# Supplementary material for: Cytokines Interleukin-1β and Tumor Necrosis Factor-α Regulate Different Transcriptional and Alternative Splicing Networks in Primary β-Cells
Source: PubMed Central journal article supplement — Diabetes. 2009 Nov 23;59(2):358–74. doi: 10.2337/db09-1159 (PMC2809955; doi:10.2337/db09-1159), 2009-11-23
Supplement: supp_db09-1159_Suppl_Table_X.pdf [file supp_db09-1159_Suppl_Table_X.pdf]

**Suppl. Table X: Exon array results for cells treated with TNF- $\alpha$ +IFN- $\gamma$  for 24h**

| Probe Set ID | Transcript Cluster ID | exon_id | Gene Title                                  | Gene Symbol | Entrez Gene ID | Splicing Index | Up/Down |
|--------------|-----------------------|---------|---------------------------------------------|-------------|----------------|----------------|---------|
| 5709365      | 7098544               | 1123986 | 2'-5' oligoadenylate synthetase 1I          | Oas1i       | 304507         | 1,48           | down    |
| 6009478      | 7098544               | 1123987 | 2'-5' oligoadenylate synthetase 1I          | Oas1i       | 304507         | 1,23           | up      |
| 6115857      | 7098544               | 1123989 | 2'-5' oligoadenylate synthetase 1I          | Oas1i       | 304507         | 1,49           | up      |
| 6147486      | 7098544               | 1123990 | 2'-5' oligoadenylate synthetase 1I          | Oas1i       | 304507         | 1,16           | up      |
| 6196405      | 7098544               | 1123988 | 2'-5' oligoadenylate synthetase 1I          | Oas1i       | 304507         | 1,05           | down    |
| 6381908      | 7098544               | 1123985 | 2'-5' oligoadenylate synthetase 1I          | Oas1i       | 304507         | 1,48           | down    |
| 6448471      | 7098544               | 1123991 | 2'-5' oligoadenylate synthetase 1I          | Oas1i       | 304507         | 1,63           | up      |
| 6695587      | 7098544               | 1123991 | 2'-5' oligoadenylate synthetase 1I          | Oas1i       | 304507         | 2,02           | down    |
| 6737496      | 7098544               | 1123991 | 2'-5' oligoadenylate synthetase 1I          | Oas1i       | 304507         | 2,15           | up      |
| 5672696      | 7102456               | 1133681 | 2'-5' oligoadenylate synthetase 1K          | Oas1k       | 494198         | 1,23           | down    |
| 5769351      | 7102456               | 1133680 | 2'-5' oligoadenylate synthetase 1K          | Oas1k       | 494198         | 1,33           | down    |
| 5786554      | 7102456               | 1133677 | 2'-5' oligoadenylate synthetase 1K          | Oas1k       | 494198         | 1,59           | up      |
| 5864118      | 7102456               | 1133678 | 2'-5' oligoadenylate synthetase 1K          | Oas1k       | 494198         | 2,50           | up      |
| 5973989      | 7102456               | 1133676 | 2'-5' oligoadenylate synthetase 1K          | Oas1k       | 494198         | 1,27           | up      |
| 6604582      | 7102456               | 1133676 | 2'-5' oligoadenylate synthetase 1K          | Oas1k       | 494198         | 1,54           | up      |
| 6638916      | 7102456               | 1133679 | 2'-5' oligoadenylate synthetase 1K          | Oas1k       | 494198         | 1,08           | down    |
| 6725783      | 7102456               | 1133681 | 2'-5' oligoadenylate synthetase 1K          | Oas1k       | 494198         | 1,23           | up      |
| 5620428      | 7098547               | 1123999 | 2'-5' oligoadenylate synthetase 1A          | Oas1a       | 192281         | 1,23           | up      |
| 5879969      | 7098547               | 1123996 | 2'-5' oligoadenylate synthetase 1A          | Oas1a       | 192281         | 1,60           | up      |
| 5937137      | 7098547               | 1124001 | 2'-5' oligoadenylate synthetase 1A          | Oas1a       | 192281         | 1,80           | down    |
| 6236607      | 7098547               | 1124000 | 2'-5' oligoadenylate synthetase 1A          | Oas1a       | 192281         | 2,08           | down    |
| 6275519      | 7098547               | 1124003 | 2'-5' oligoadenylate synthetase 1A          | Oas1a       | 192281         | 1,65           | down    |
| 6390640      | 7098547               | 1124002 | 2'-5' oligoadenylate synthetase 1A          | Oas1a       | 192281         | 1,65           | down    |
| 6426242      | 7098547               | 1123998 | 2'-5' oligoadenylate synthetase 1A          | Oas1a       | 192281         | 4,92           | up      |
| 6542543      | 7098547               | 1123997 | 2'-5' oligoadenylate synthetase 1A          | Oas1a       | 192281         | 3,15           | up      |
| 5747176      | 7102451               | 1133666 | 2-5 oligoadenylate synthetase 1B            | Oas1b       | 246268         | 1,84           | up      |
| 5775546      | 7102451               | 1133668 | 2-5 oligoadenylate synthetase 1B            | Oas1b       | 246268         | 1,54           | down    |
| 6063513      | 7102451               | 1133670 | 2-5 oligoadenylate synthetase 1B            | Oas1b       | 246268         | 2,50           | up      |
| 6091554      | 7102451               | 1133671 | 2-5 oligoadenylate synthetase 1B            | Oas1b       | 246268         | 1,03           | up      |
| 6346138      | 7102451               | 1133666 | 2-5 oligoadenylate synthetase 1B            | Oas1b       | 246268         | 2,35           | down    |
| 6358784      | 7102451               | 1133667 | 2-5 oligoadenylate synthetase 1B            | Oas1b       | 246268         | 1,01           | up      |
| 6724804      | 7102451               | 1133669 | 2-5 oligoadenylate synthetase 1B            | Oas1b       | 246268         | 1,34           | up      |
| 5651934      | 7103001               | 1135104 | 2'-5' oligoadenylate synthetase-like 2      | Oas12       | 304549         | 7,78           | down    |
| 5656665      | 7103001               | 1135104 | 2'-5' oligoadenylate synthetase-like 2      | Oas12       | 304549         | 1,68           | up      |
| 6056295      | 7103001               | 1135098 | 2'-5' oligoadenylate synthetase-like 2      | Oas12       | 304549         | 2,11           | up      |
| 6215854      | 7103001               | 1135101 | 2'-5' oligoadenylate synthetase-like 2      | Oas12       | 304549         | 1,34           | up      |
| 6435093      | 7103001               | 1135103 | 2'-5' oligoadenylate synthetase-like 2      | Oas12       | 304549         | 1,94           | down    |
| 6486269      | 7103001               | 1135100 | 2'-5' oligoadenylate synthetase-like 2      | Oas12       | 304549         | 1,17           | down    |
| 6563387      | 7103001               | 1135099 | 2'-5' oligoadenylate synthetase-like 2      | Oas12       | 304549         | 1,04           | up      |
| 6615309      | 7103001               | 1135102 | 2'-5' oligoadenylate synthetase-like 2      | Oas12       | 304549         | 1,21           | up      |
| 5733611      | 7103432               | 1136214 | 2'-5'-oligoadenylate synthetase 2, 69/71kDa | Oas2        | 363938         | 1,40           | up      |
| 5854719      | 7103432               | 1136216 | 2'-5'-oligoadenylate synthetase 2, 69/71kDa | Oas2        | 363938         | 1,09           | up      |
| 6108591      | 7103432               | 1136215 | 2'-5'-oligoadenylate synthetase 2, 69/71kDa | Oas2        | 363938         | 1,55           | up      |
| 6127610      | 7103432               | 1136212 | 2'-5'-oligoadenylate synthetase 2, 69/71kDa | Oas2        | 363938         | 1,60           | down    |
| 6172069      | 7103432               | 1136221 | 2'-5'-oligoadenylate synthetase 2, 69/71kDa | Oas2        | 363938         | 2,08           | down    |
| 6218833      | 7103432               | 1136212 | 2'-5'-oligoadenylate synthetase 2, 69/71kDa | Oas2        | 363938         | 1,23           | down    |
| 6251715      | 7103432               | 1136218 | 2'-5'-oligoadenylate synthetase 2, 69/71kDa | Oas2        | 363938         | 1,61           | down    |
| 6252603      | 7103432               | 1136219 | 2'-5'-oligoadenylate synthetase 2, 69/71kDa | Oas2        | 363938         | 1,68           | up      |
| 6328359      | 7103432               | 1136220 | 2'-5'-oligoadenylate synthetase 2, 69/71kDa | Oas2        | 363938         | 1,95           | down    |
| 6337497      | 7103432               | 1136213 | 2'-5'-oligoadenylate synthetase 2, 69/71kDa | Oas2        | 363938         | 2,52           | up      |
| 6517825      | 7103432               | 1136222 | 2'-5'-oligoadenylate synthetase 2, 69/71kDa | Oas2        | 363938         | 1,66           | down    |
| 6564864      | 7103432               | 1136213 | 2'-5'-oligoadenylate synthetase 2, 69/71kDa | Oas2        | 363938         | 1,13           | down    |
| 6701470      | 7103432               | 1136217 | 2'-5'-oligoadenylate synthetase 2, 69/71kDa | Oas2        | 363938         | 2,02           | down    |

|         |         |         |                                                                   |        |        |      |      |
|---------|---------|---------|-------------------------------------------------------------------|--------|--------|------|------|
| 5644169 | 7102992 | 1135089 | 2'-5'-oligoadenylate synthetase-like                              | Oasl   | 304545 | 2,00 | down |
| 5879021 | 7102992 | 1135088 | 2'-5'-oligoadenylate synthetase-like                              | Oasl   | 304545 | 1,42 | up   |
| 5903505 | 7102992 | 1135084 | 2'-5'-oligoadenylate synthetase-like                              | Oasl   | 304545 | 1,24 | down |
| 5975456 | 7102992 | 1135089 | 2'-5'-oligoadenylate synthetase-like                              | Oasl   | 304545 | 1,91 | up   |
| 6072279 | 7102992 | 1135087 | 2'-5'-oligoadenylate synthetase-like                              | Oasl   | 304545 | 1,65 | up   |
| 6135576 | 7102992 | 1135084 | 2'-5'-oligoadenylate synthetase-like                              | Oasl   | 304545 | 1,38 | down |
| 6237389 | 7102992 | 1135086 | 2'-5'-oligoadenylate synthetase-like                              | Oasl   | 304545 | 1,53 | up   |
| 6364778 | 7102992 | 1135083 | 2'-5'-oligoadenylate synthetase-like                              | Oasl   | 304545 | 1,58 | down |
| 6482496 | 7102992 | 1135085 | 2'-5'-oligoadenylate synthetase-like                              | Oasl   | 304545 | 1,29 | up   |
| 5621988 | 7279207 | 1571051 | 3-oxoacid CoA transferase 2A                                      | Oxct2a | 366463 | 1,13 | up   |
| 5924895 | 7279207 | 1571052 | 3-oxoacid CoA transferase 2A                                      | Oxct2a | 366463 | 1,06 | down |
| 5939630 | 7279207 | 1571053 | 3-oxoacid CoA transferase 2A                                      | Oxct2a | 366463 | 1,28 | down |
| 6197080 | 7279207 | 1571051 | 3-oxoacid CoA transferase 2A                                      | Oxct2a | 366463 | 2,42 | down |
| 6238512 | 7279207 | 1571051 | 3-oxoacid CoA transferase 2A                                      | Oxct2a | 366463 | 1,67 | up   |
| 5637417 | 7084999 | 1090713 | 5-azacytidine induced 1                                           | Azi1   | 360672 | 1,31 | up   |
| 5640317 | 7084999 | 1090711 | 5-azacytidine induced 1                                           | Azi1   | 360672 | 1,02 | down |
| 5794941 | 7084999 | 1090718 | 5-azacytidine induced 1                                           | Azi1   | 360672 | 1,12 | up   |
| 5862069 | 7084999 | 1090724 | 5-azacytidine induced 1                                           | Azi1   | 360672 | 1,08 | up   |
| 5866981 | 7084999 | 1090705 | 5-azacytidine induced 1                                           | Azi1   | 360672 | 1,31 | up   |
| 5930863 | 7084999 | 1090722 | 5-azacytidine induced 1                                           | Azi1   | 360672 | 1,38 | up   |
| 5955229 | 7084999 | 1090715 | 5-azacytidine induced 1                                           | Azi1   | 360672 | 2,77 | up   |
| 5975956 | 7084999 | 1090708 | 5-azacytidine induced 1                                           | Azi1   | 360672 | 1,10 | up   |
| 6051163 | 7084999 | 1090714 | 5-azacytidine induced 1                                           | Azi1   | 360672 | 1,14 | up   |
| 6056167 | 7084999 | 1090707 | 5-azacytidine induced 1                                           | Azi1   | 360672 | 1,40 | up   |
| 6075562 | 7084999 | 1090709 | 5-azacytidine induced 1                                           | Azi1   | 360672 | 1,06 | down |
| 6125000 | 7084999 | 1090702 | 5-azacytidine induced 1                                           | Azi1   | 360672 | 1,29 | down |
| 6165196 | 7084999 | 1090712 | 5-azacytidine induced 1                                           | Azi1   | 360672 | 1,78 | down |
| 6201459 | 7084999 | 1090703 | 5-azacytidine induced 1                                           | Azi1   | 360672 | 1,60 | down |
| 6230865 | 7084999 | 1090716 | 5-azacytidine induced 1                                           | Azi1   | 360672 | 1,10 | up   |
| 6254775 | 7084999 | 1090719 | 5-azacytidine induced 1                                           | Azi1   | 360672 | 1,06 | down |
| 6293849 | 7084999 | 1090710 | 5-azacytidine induced 1                                           | Azi1   | 360672 | 1,03 | up   |
| 6386356 | 7084999 | 1090717 | 5-azacytidine induced 1                                           | Azi1   | 360672 | 1,27 | down |
| 6460877 | 7084999 | 1090699 | 5-azacytidine induced 1                                           | Azi1   | 360672 | 1,09 | up   |
| 6472637 | 7084999 | 1090704 | 5-azacytidine induced 1                                           | Azi1   | 360672 | 1,29 | up   |
| 6472732 | 7084999 | 1090700 | 5-azacytidine induced 1                                           | Azi1   | 360672 | 1,43 | up   |
| 6527965 | 7084999 | 1090720 | 5-azacytidine induced 1                                           | Azi1   | 360672 | 1,17 | down |
| 6580232 | 7084999 | 1090701 | 5-azacytidine induced 1                                           | Azi1   | 360672 | 1,05 | down |
| 6605269 | 7084999 | 1090698 | 5-azacytidine induced 1                                           | Azi1   | 360672 | 1,02 | up   |
| 6658260 | 7084999 | 1090706 | 5-azacytidine induced 1                                           | Azi1   | 360672 | 1,35 | down |
| 6662323 | 7084999 | 1090721 | 5-azacytidine induced 1                                           | Azi1   | 360672 | 1,04 | up   |
| 6677101 | 7084999 | 1090724 | 5-azacytidine induced 1                                           | Azi1   | 360672 | 1,46 | up   |
| 6742768 | 7084999 | 1090704 | 5-azacytidine induced 1                                           | Azi1   | 360672 | 2,15 | down |
| 5669460 | 7154584 | 1262121 | 5-methyltetrahydrofolate-homocysteine methyltransferase reductase | Mtrr   | 290947 | 1,21 | down |
| 5697838 | 7154584 | 1262109 | 5-methyltetrahydrofolate-homocysteine methyltransferase reductase | Mtrr   | 290947 | 1,20 | down |
| 5711692 | 7154584 | 1262113 | 5-methyltetrahydrofolate-homocysteine methyltransferase reductase | Mtrr   | 290947 | 1,01 | up   |
| 5720087 | 7154584 | 1262115 | 5-methyltetrahydrofolate-homocysteine methyltransferase reductase | Mtrr   | 290947 | 1,10 | down |
| 5730998 | 7154584 | 1262105 | 5-methyltetrahydrofolate-homocysteine methyltransferase reductase | Mtrr   | 290947 | 1,78 | up   |
| 5781411 | 7154584 | 1262117 | 5-methyltetrahydrofolate-homocysteine methyltransferase reductase | Mtrr   | 290947 | 1,18 | up   |
| 5875782 | 7154584 | 1262106 | 5-methyltetrahydrofolate-homocysteine methyltransferase reductase | Mtrr   | 290947 | 1,05 | up   |
| 6005324 | 7154584 | 1262113 | 5-methyltetrahydrofolate-homocysteine methyltransferase reductase | Mtrr   | 290947 | 1,05 | down |
| 6248099 | 7154584 | 1262119 | 5-methyltetrahydrofolate-homocysteine methyltransferase reductase | Mtrr   | 290947 | 1,60 | up   |
| 6407482 | 7154584 | 1262111 | 5-methyltetrahydrofolate-homocysteine methyltransferase reductase | Mtrr   | 290947 | 1,05 | up   |
| 6455025 | 7154584 | 1262122 | 5-methyltetrahydrofolate-homocysteine methyltransferase reductase | Mtrr   | 290947 | 1,16 | up   |
| 6488624 | 7154584 | 1262110 | 5-methyltetrahydrofolate-homocysteine methyltransferase reductase | Mtrr   | 290947 | 1,15 | up   |
| 6495892 | 7154584 | 1262106 | 5-methyltetrahydrofolate-homocysteine methyltransferase reductase | Mtrr   | 290947 | 2,17 | down |
| 6504485 | 7154584 | 1262112 | 5-methyltetrahydrofolate-homocysteine methyltransferase reductase | Mtrr   | 290947 | 1,07 | up   |

|         |         |         |                                                                                   |         |        |      |      |
|---------|---------|---------|-----------------------------------------------------------------------------------|---------|--------|------|------|
| 6567969 | 7154584 | 1262119 | 5-methyltetrahydrofolate-homocysteine methyltransferase reductase                 | Mtrr    | 290947 | 1,85 | down |
| 6638684 | 7154584 | 1262116 | 5-methyltetrahydrofolate-homocysteine methyltransferase reductase                 | Mtrr    | 290947 | 1,17 | up   |
| 6690693 | 7154584 | 1262118 | 5-methyltetrahydrofolate-homocysteine methyltransferase reductase                 | Mtrr    | 290947 | 1,49 | up   |
| 5648566 | 7159665 | 1274311 | 6-phosphofructo-2-kinase/fructose-2,6-biphosphatase 3                             | Pfkfb3  | 117276 | 1,54 | up   |
| 5666908 | 7159665 | 1274315 | 6-phosphofructo-2-kinase/fructose-2,6-biphosphatase 3                             | Pfkfb3  | 117276 | 1,76 | up   |
| 5670352 | 7159665 | 1274319 | 6-phosphofructo-2-kinase/fructose-2,6-biphosphatase 3                             | Pfkfb3  | 117276 | 1,36 | up   |
| 5688951 | 7159665 | 1274316 | 6-phosphofructo-2-kinase/fructose-2,6-biphosphatase 3                             | Pfkfb3  | 117276 | 1,01 | up   |
| 5700872 | 7159665 | 1274314 | 6-phosphofructo-2-kinase/fructose-2,6-biphosphatase 3                             | Pfkfb3  | 117276 | 1,21 | up   |
| 5737247 | 7159665 | 1274307 | 6-phosphofructo-2-kinase/fructose-2,6-biphosphatase 3                             | Pfkfb3  | 117276 | 1,32 | down |
| 5789613 | 7159665 | 1274308 | 6-phosphofructo-2-kinase/fructose-2,6-biphosphatase 3                             | Pfkfb3  | 117276 | 1,36 | up   |
| 5889366 | 7159665 | 1274306 | 6-phosphofructo-2-kinase/fructose-2,6-biphosphatase 3                             | Pfkfb3  | 117276 | 1,62 | down |
| 5942631 | 7159665 | 1274306 | 6-phosphofructo-2-kinase/fructose-2,6-biphosphatase 3                             | Pfkfb3  | 117276 | 1,71 | down |
| 6115158 | 7159665 | 1274322 | 6-phosphofructo-2-kinase/fructose-2,6-biphosphatase 3                             | Pfkfb3  | 117276 | 3,08 | down |
| 6129802 | 7159665 | 1274312 | 6-phosphofructo-2-kinase/fructose-2,6-biphosphatase 3                             | Pfkfb3  | 117276 | 1,71 | up   |
| 6152977 | 7159665 | 1274318 | 6-phosphofructo-2-kinase/fructose-2,6-biphosphatase 3                             | Pfkfb3  | 117276 | 2,50 | up   |
| 6181114 | 7159665 | 1274321 | 6-phosphofructo-2-kinase/fructose-2,6-biphosphatase 3                             | Pfkfb3  | 117276 | 1,84 | down |
| 6216325 | 7159665 | 1274317 | 6-phosphofructo-2-kinase/fructose-2,6-biphosphatase 3                             | Pfkfb3  | 117276 | 1,05 | down |
| 6228567 | 7159665 | 1274320 | 6-phosphofructo-2-kinase/fructose-2,6-biphosphatase 3                             | Pfkfb3  | 117276 | 2,12 | down |
| 6263159 | 7159665 | 1274323 | 6-phosphofructo-2-kinase/fructose-2,6-biphosphatase 3                             | Pfkfb3  | 117276 | 1,49 | down |
| 6287777 | 7159665 | 1274313 | 6-phosphofructo-2-kinase/fructose-2,6-biphosphatase 3                             | Pfkfb3  | 117276 | 1,63 | up   |
| 6504948 | 7159665 | 1274310 | 6-phosphofructo-2-kinase/fructose-2,6-biphosphatase 3                             | Pfkfb3  | 117276 | 1,67 | down |
| 6523159 | 7159665 | 1274309 | 6-phosphofructo-2-kinase/fructose-2,6-biphosphatase 3                             | Pfkfb3  | 117276 | 1,22 | up   |
| 5724964 | 7345424 | 1733746 | 6-pyruvoyl-tetrahydropterin synthase                                              | Pts     | 29498  | 1,01 | up   |
| 5772334 | 7345424 | 1733746 | 6-pyruvoyl-tetrahydropterin synthase                                              | Pts     | 29498  | 1,47 | up   |
| 5845781 | 7345424 | 1733742 | 6-pyruvoyl-tetrahydropterin synthase                                              | Pts     | 29498  | 1,25 | up   |
| 5868808 | 7345424 | 1733741 | 6-pyruvoyl-tetrahydropterin synthase                                              | Pts     | 29498  | 1,20 | down |
| 6086392 | 7345424 | 1733743 | 6-pyruvoyl-tetrahydropterin synthase                                              | Pts     | 29498  | 1,26 | up   |
| 6107708 | 7345424 | 1733744 | 6-pyruvoyl-tetrahydropterin synthase                                              | Pts     | 29498  | 1,14 | up   |
| 6342636 | 7345424 | 1733745 | 6-pyruvoyl-tetrahydropterin synthase                                              | Pts     | 29498  | 2,50 | down |
| 5635825 | 7038734 | 982368  | 7-dehydrocholesterol reductase                                                    | Dhcr7   | 64191  | 1,16 | down |
| 6283441 | 7038734 | 982363  | 7-dehydrocholesterol reductase                                                    | Dhcr7   | 64191  | 2,20 | up   |
| 6341321 | 7038734 | 982366  | 7-dehydrocholesterol reductase                                                    | Dhcr7   | 64191  | 1,03 | down |
| 6352837 | 7038734 | 982370  | 7-dehydrocholesterol reductase                                                    | Dhcr7   | 64191  | 1,17 | up   |
| 6382993 | 7038734 | 982372  | 7-dehydrocholesterol reductase                                                    | Dhcr7   | 64191  | 1,36 | down |
| 6450350 | 7038734 | 982364  | 7-dehydrocholesterol reductase                                                    | Dhcr7   | 64191  | 1,12 | up   |
| 6462128 | 7038734 | 982371  | 7-dehydrocholesterol reductase                                                    | Dhcr7   | 64191  | 1,20 | up   |
| 6551640 | 7038734 | 982367  | 7-dehydrocholesterol reductase                                                    | Dhcr7   | 64191  | 1,09 | up   |
| 6632457 | 7038734 | 982365  | 7-dehydrocholesterol reductase                                                    | Dhcr7   | 64191  | 1,06 | down |
| 6678885 | 7038734 | 982369  | 7-dehydrocholesterol reductase                                                    | Dhcr7   | 64191  | 1,05 | up   |
| 5620539 | 7267380 | 1540449 | a disintegrin-like and metalloprotease (reprolysin type) with thrombospondin type | Adamts9 | 312566 | 1,22 | up   |
| 5654537 | 7267380 | 1540434 | a disintegrin-like and metalloprotease (reprolysin type) with thrombospondin type | Adamts9 | 312566 | 1,01 | down |
| 5666520 | 7267380 | 1540391 | a disintegrin-like and metalloprotease (reprolysin type) with thrombospondin type | Adamts9 | 312566 | 1,25 | down |
| 5687431 | 7267380 | 1540392 | a disintegrin-like and metalloprotease (reprolysin type) with thrombospondin type | Adamts9 | 312566 | 1,11 | down |
| 5698615 | 7267380 | 1540435 | a disintegrin-like and metalloprotease (reprolysin type) with thrombospondin type | Adamts9 | 312566 | 1,14 | up   |
| 5709406 | 7267380 | 1540389 | a disintegrin-like and metalloprotease (reprolysin type) with thrombospondin type | Adamts9 | 312566 | 1,01 | down |
| 5757498 | 7267380 | 1540431 | a disintegrin-like and metalloprotease (reprolysin type) with thrombospondin type | Adamts9 | 312566 | 1,12 | down |
| 5764048 | 7267380 | 1540421 | a disintegrin-like and metalloprotease (reprolysin type) with thrombospondin type | Adamts9 | 312566 | 1,36 | up   |
| 5764344 | 7267380 | 1540423 | a disintegrin-like and metalloprotease (reprolysin type) with thrombospondin type | Adamts9 | 312566 | 1,14 | down |
| 5805067 | 7267380 | 1540448 | a disintegrin-like and metalloprotease (reprolysin type) with thrombospondin type | Adamts9 | 312566 | 1,14 | down |
| 5806689 | 7267380 | 1540411 | a disintegrin-like and metalloprotease (reprolysin type) with thrombospondin type | Adamts9 | 312566 | 1,34 | up   |
| 5819036 | 7267380 | 1540420 | a disintegrin-like and metalloprotease (reprolysin type) with thrombospondin type | Adamts9 | 312566 | 1,39 | up   |
| 5843916 | 7267380 | 1540419 | a disintegrin-like and metalloprotease (reprolysin type) with thrombospondin type | Adamts9 | 312566 | 1,03 | up   |
| 5889023 | 7267380 | 1540401 | a disintegrin-like and metalloprotease (reprolysin type) with thrombospondin type | Adamts9 | 312566 | 1,03 | up   |
| 5889405 | 7267380 | 1540449 | a disintegrin-like and metalloprotease (reprolysin type) with thrombospondin type | Adamts9 | 312566 | 1,22 | down |
| 5899429 | 7267380 | 1540385 | a disintegrin-like and metalloprotease (reprolysin type) with thrombospondin type | Adamts9 | 312566 | 1,06 | up   |
| 5905958 | 7267380 | 1540450 | a disintegrin-like and metalloprotease (reprolysin type) with thrombospondin type | Adamts9 | 312566 | 1,21 | up   |

|         |         |         |                                                                                   |         |        |      |      |
|---------|---------|---------|-----------------------------------------------------------------------------------|---------|--------|------|------|
| 5979583 | 7267380 | 1540422 | a disintegrin-like and metalloprotease (reprolysin type) with thrombospondin type | Adamts9 | 312566 | 1,04 | up   |
| 6015108 | 7267380 | 1540409 | a disintegrin-like and metalloprotease (reprolysin type) with thrombospondin type | Adamts9 | 312566 | 1,02 | down |
| 6030011 | 7267380 | 1540417 | a disintegrin-like and metalloprotease (reprolysin type) with thrombospondin type | Adamts9 | 312566 | 1,96 | up   |
| 6034156 | 7267380 | 1540401 | a disintegrin-like and metalloprotease (reprolysin type) with thrombospondin type | Adamts9 | 312566 | 1,41 | up   |
| 6051617 | 7267380 | 1540409 | a disintegrin-like and metalloprotease (reprolysin type) with thrombospondin type | Adamts9 | 312566 | 1,43 | up   |
| 6065162 | 7267380 | 1540437 | a disintegrin-like and metalloprotease (reprolysin type) with thrombospondin type | Adamts9 | 312566 | 1,02 | down |
| 6086847 | 7267380 | 1540427 | a disintegrin-like and metalloprotease (reprolysin type) with thrombospondin type | Adamts9 | 312566 | 1,02 | down |
| 6093414 | 7267380 | 1540382 | a disintegrin-like and metalloprotease (reprolysin type) with thrombospondin type | Adamts9 | 312566 | 1,10 | down |
| 6117423 | 7267380 | 1540394 | a disintegrin-like and metalloprotease (reprolysin type) with thrombospondin type | Adamts9 | 312566 | 1,00 | down |
| 6154869 | 7267380 | 1540413 | a disintegrin-like and metalloprotease (reprolysin type) with thrombospondin type | Adamts9 | 312566 | 1,02 | up   |
| 6184195 | 7267380 | 1540382 | a disintegrin-like and metalloprotease (reprolysin type) with thrombospondin type | Adamts9 | 312566 | 1,10 | down |
| 6197822 | 7267380 | 1540390 | a disintegrin-like and metalloprotease (reprolysin type) with thrombospondin type | Adamts9 | 312566 | 1,23 | down |
| 6222419 | 7267380 | 1540425 | a disintegrin-like and metalloprotease (reprolysin type) with thrombospondin type | Adamts9 | 312566 | 1,29 | up   |
| 6227732 | 7267380 | 1540410 | a disintegrin-like and metalloprotease (reprolysin type) with thrombospondin type | Adamts9 | 312566 | 1,07 | up   |
| 6255735 | 7267380 | 1540405 | a disintegrin-like and metalloprotease (reprolysin type) with thrombospondin type | Adamts9 | 312566 | 1,33 | down |
| 6290433 | 7267380 | 1540427 | a disintegrin-like and metalloprotease (reprolysin type) with thrombospondin type | Adamts9 | 312566 | 1,05 | down |
| 6318559 | 7267380 | 1540438 | a disintegrin-like and metalloprotease (reprolysin type) with thrombospondin type | Adamts9 | 312566 | 1,00 | down |
| 6324502 | 7267380 | 1540414 | a disintegrin-like and metalloprotease (reprolysin type) with thrombospondin type | Adamts9 | 312566 | 1,02 | down |
| 6380179 | 7267380 | 1540406 | a disintegrin-like and metalloprotease (reprolysin type) with thrombospondin type | Adamts9 | 312566 | 1,07 | up   |
| 6383731 | 7267380 | 1540398 | a disintegrin-like and metalloprotease (reprolysin type) with thrombospondin type | Adamts9 | 312566 | 1,14 | up   |
| 6419435 | 7267380 | 1540409 | a disintegrin-like and metalloprotease (reprolysin type) with thrombospondin type | Adamts9 | 312566 | 1,33 | down |
| 6447913 | 7267380 | 1540425 | a disintegrin-like and metalloprotease (reprolysin type) with thrombospondin type | Adamts9 | 312566 | 1,02 | down |
| 6498275 | 7267380 | 1540398 | a disintegrin-like and metalloprotease (reprolysin type) with thrombospondin type | Adamts9 | 312566 | 1,14 | up   |
| 6508891 | 7267380 | 1540416 | a disintegrin-like and metalloprotease (reprolysin type) with thrombospondin type | Adamts9 | 312566 | 1,36 | down |
| 6510785 | 7267380 | 1540451 | a disintegrin-like and metalloprotease (reprolysin type) with thrombospondin type | Adamts9 | 312566 | 1,19 | down |
| 6516805 | 7267380 | 1540402 | a disintegrin-like and metalloprotease (reprolysin type) with thrombospondin type | Adamts9 | 312566 | 1,04 | up   |
| 6570546 | 7267380 | 1540395 | a disintegrin-like and metalloprotease (reprolysin type) with thrombospondin type | Adamts9 | 312566 | 1,00 | up   |
| 6577018 | 7267380 | 1540393 | a disintegrin-like and metalloprotease (reprolysin type) with thrombospondin type | Adamts9 | 312566 | 1,74 | up   |
| 6619930 | 7267380 | 1540416 | a disintegrin-like and metalloprotease (reprolysin type) with thrombospondin type | Adamts9 | 312566 | 1,25 | up   |
| 6630892 | 7267380 | 1540424 | a disintegrin-like and metalloprotease (reprolysin type) with thrombospondin type | Adamts9 | 312566 | 1,03 | up   |
| 6661246 | 7267380 | 1540398 | a disintegrin-like and metalloprotease (reprolysin type) with thrombospondin type | Adamts9 | 312566 | 1,37 | down |
| 6668347 | 7267380 | 1540436 | a disintegrin-like and metalloprotease (reprolysin type) with thrombospondin type | Adamts9 | 312566 | 1,01 | down |
| 6685006 | 7267380 | 1540440 | a disintegrin-like and metalloprotease (reprolysin type) with thrombospondin type | Adamts9 | 312566 | 1,45 | down |
| 6686524 | 7267380 | 1540417 | a disintegrin-like and metalloprotease (reprolysin type) with thrombospondin type | Adamts9 | 312566 | 1,04 | up   |
| 6711985 | 7267380 | 1540451 | a disintegrin-like and metalloprotease (reprolysin type) with thrombospondin type | Adamts9 | 312566 | 1,04 | down |
| 6714183 | 7267380 | 1540402 | a disintegrin-like and metalloprotease (reprolysin type) with thrombospondin type | Adamts9 | 312566 | 1,53 | down |
| 6746738 | 7267380 | 1540414 | a disintegrin-like and metalloprotease (reprolysin type) with thrombospondin type | Adamts9 | 312566 | 1,30 | down |
| 5916080 | 7026578 | 952719  | A kinase (PRKA) anchor protein 12                                                 | Akap12  | 83425  | 1,80 | up   |
| 6018267 | 7026578 | 952718  | A kinase (PRKA) anchor protein 12                                                 | Akap12  | 83425  | 1,21 | up   |
| 6039369 | 7026578 | 952718  | A kinase (PRKA) anchor protein 12                                                 | Akap12  | 83425  | 1,35 | up   |
| 6089645 | 7026578 | 952713  | A kinase (PRKA) anchor protein 12                                                 | Akap12  | 83425  | 1,67 | down |
| 6165531 | 7026578 | 952718  | A kinase (PRKA) anchor protein 12                                                 | Akap12  | 83425  | 1,50 | down |
| 6272205 | 7026578 | 952717  | A kinase (PRKA) anchor protein 12                                                 | Akap12  | 83425  | 1,00 | up   |
| 6283187 | 7026578 | 952717  | A kinase (PRKA) anchor protein 12                                                 | Akap12  | 83425  | 1,56 | up   |
| 6313994 | 7026578 | 952715  | A kinase (PRKA) anchor protein 12                                                 | Akap12  | 83425  | 1,54 | down |
| 6379541 | 7026578 | 952716  | A kinase (PRKA) anchor protein 12                                                 | Akap12  | 83425  | 1,94 | down |
| 6396395 | 7026578 | 952713  | A kinase (PRKA) anchor protein 12                                                 | Akap12  | 83425  | 2,12 | down |
| 6427730 | 7026578 | 952717  | A kinase (PRKA) anchor protein 12                                                 | Akap12  | 83425  | 1,57 | up   |
| 6565976 | 7026578 | 952717  | A kinase (PRKA) anchor protein 12                                                 | Akap12  | 83425  | 1,18 | down |
| 6567780 | 7026578 | 952715  | A kinase (PRKA) anchor protein 12                                                 | Akap12  | 83425  | 2,08 | down |
| 6635629 | 7026578 | 952717  | A kinase (PRKA) anchor protein 12                                                 | Akap12  | 83425  | 1,14 | down |
| 6680764 | 7026578 | 952714  | A kinase (PRKA) anchor protein 12                                                 | Akap12  | 83425  | 1,34 | down |
| 5653344 | 7275485 | 1561235 | A kinase (PRKA) anchor protein 2                                                  | Akap2   | 298024 | 1,09 | up   |
| 5720544 | 7275485 | 1561233 | A kinase (PRKA) anchor protein 2                                                  | Akap2   | 298024 | 1,81 | down |
| 5734643 | 7275485 | 1561232 | A kinase (PRKA) anchor protein 2                                                  | Akap2   | 298024 | 1,21 | up   |
| 5803797 | 7275485 | 1561234 | A kinase (PRKA) anchor protein 2                                                  | Akap2   | 298024 | 1,11 | up   |

|         |         |         |                                     |       |        |      |      |
|---------|---------|---------|-------------------------------------|-------|--------|------|------|
| 5945636 | 7275485 | 1561233 | A kinase (PRKA) anchor protein 2    | Akap2 | 298024 | 1,81 | down |
| 6010770 | 7275485 | 1561233 | A kinase (PRKA) anchor protein 2    | Akap2 | 298024 | 1,93 | down |
| 6050343 | 7275485 | 1561233 | A kinase (PRKA) anchor protein 2    | Akap2 | 298024 | 1,13 | up   |
| 6063099 | 7275485 | 1561232 | A kinase (PRKA) anchor protein 2    | Akap2 | 298024 | 3,19 | up   |
| 6126581 | 7275485 | 1561233 | A kinase (PRKA) anchor protein 2    | Akap2 | 298024 | 1,30 | down |
| 6190223 | 7275485 | 1561231 | A kinase (PRKA) anchor protein 2    | Akap2 | 298024 | 2,55 | down |
| 6227700 | 7275485 | 1561233 | A kinase (PRKA) anchor protein 2    | Akap2 | 298024 | 1,39 | up   |
| 6592868 | 7275485 | 1561233 | A kinase (PRKA) anchor protein 2    | Akap2 | 298024 | 1,46 | up   |
| 6679373 | 7275485 | 1561233 | A kinase (PRKA) anchor protein 2    | Akap2 | 298024 | 1,02 | up   |
| 5625357 | 7224166 | 1432685 | absent in melanoma 1                | Aim1  | 309866 | 2,06 | up   |
| 5653783 | 7224166 | 1432661 | absent in melanoma 1                | Aim1  | 309866 | 1,00 | down |
| 5668742 | 7224166 | 1432679 | absent in melanoma 1                | Aim1  | 309866 | 1,38 | up   |
| 5668816 | 7224166 | 1432668 | absent in melanoma 1                | Aim1  | 309866 | 1,10 | down |
| 5756420 | 7224166 | 1432669 | absent in melanoma 1                | Aim1  | 309866 | 1,07 | down |
| 5847911 | 7224166 | 1432675 | absent in melanoma 1                | Aim1  | 309866 | 1,28 | up   |
| 6025526 | 7224166 | 1432667 | absent in melanoma 1                | Aim1  | 309866 | 1,03 | down |
| 6061286 | 7224166 | 1432661 | absent in melanoma 1                | Aim1  | 309866 | 1,72 | down |
| 6074802 | 7224166 | 1432671 | absent in melanoma 1                | Aim1  | 309866 | 1,05 | up   |
| 6093803 | 7224166 | 1432684 | absent in melanoma 1                | Aim1  | 309866 | 1,22 | down |
| 6098911 | 7224166 | 1432665 | absent in melanoma 1                | Aim1  | 309866 | 1,49 | up   |
| 6178934 | 7224166 | 1432671 | absent in melanoma 1                | Aim1  | 309866 | 1,02 | down |
| 6287498 | 7224166 | 1432672 | absent in melanoma 1                | Aim1  | 309866 | 1,16 | down |
| 6291922 | 7224166 | 1432664 | absent in melanoma 1                | Aim1  | 309866 | 1,36 | up   |
| 6314742 | 7224166 | 1432673 | absent in melanoma 1                | Aim1  | 309866 | 1,11 | down |
| 6329187 | 7224166 | 1432680 | absent in melanoma 1                | Aim1  | 309866 | 1,46 | up   |
| 6329238 | 7224166 | 1432678 | absent in melanoma 1                | Aim1  | 309866 | 1,39 | down |
| 6371298 | 7224166 | 1432684 | absent in melanoma 1                | Aim1  | 309866 | 1,11 | up   |
| 6386044 | 7224166 | 1432685 | absent in melanoma 1                | Aim1  | 309866 | 1,85 | up   |
| 6473292 | 7224166 | 1432666 | absent in melanoma 1                | Aim1  | 309866 | 1,03 | down |
| 6606730 | 7224166 | 1432670 | absent in melanoma 1                | Aim1  | 309866 | 1,36 | up   |
| 6700470 | 7224166 | 1432682 | absent in melanoma 1                | Aim1  | 309866 | 1,16 | down |
| 6723675 | 7224166 | 1432681 | absent in melanoma 1                | Aim1  | 309866 | 1,16 | up   |
| 5656104 | 7070578 | 1057650 | acetyl-coenzyme A carboxylase alpha | Acaca | 60581  | 1,27 | up   |
| 5664127 | 7070578 | 1057640 | acetyl-coenzyme A carboxylase alpha | Acaca | 60581  | 1,79 | down |
| 5670068 | 7070578 | 1057687 | acetyl-coenzyme A carboxylase alpha | Acaca | 60581  | 1,14 | up   |
| 5675284 | 7070578 | 1057667 | acetyl-coenzyme A carboxylase alpha | Acaca | 60581  | 2,01 | down |
| 5682562 | 7070578 | 1057685 | acetyl-coenzyme A carboxylase alpha | Acaca | 60581  | 1,00 | down |
| 5684970 | 7070578 | 1057663 | acetyl-coenzyme A carboxylase alpha | Acaca | 60581  | 1,34 | up   |
| 5688446 | 7070578 | 1057680 | acetyl-coenzyme A carboxylase alpha | Acaca | 60581  | 1,44 | down |
| 5716308 | 7070578 | 1057646 | acetyl-coenzyme A carboxylase alpha | Acaca | 60581  | 1,29 | down |
| 5763710 | 7070578 | 1057661 | acetyl-coenzyme A carboxylase alpha | Acaca | 60581  | 1,10 | up   |
| 5780987 | 7070578 | 1057664 | acetyl-coenzyme A carboxylase alpha | Acaca | 60581  | 1,26 | up   |
| 5788556 | 7070578 | 1057676 | acetyl-coenzyme A carboxylase alpha | Acaca | 60581  | 1,06 | down |
| 5796594 | 7070578 | 1057648 | acetyl-coenzyme A carboxylase alpha | Acaca | 60581  | 1,41 | up   |
| 5823086 | 7070578 | 1057665 | acetyl-coenzyme A carboxylase alpha | Acaca | 60581  | 1,22 | up   |
| 5846180 | 7070578 | 1057686 | acetyl-coenzyme A carboxylase alpha | Acaca | 60581  | 1,12 | down |
| 5849919 | 7070578 | 1057653 | acetyl-coenzyme A carboxylase alpha | Acaca | 60581  | 1,37 | down |
| 5850235 | 7070578 | 1057681 | acetyl-coenzyme A carboxylase alpha | Acaca | 60581  | 1,06 | down |
| 5859689 | 7070578 | 1057636 | acetyl-coenzyme A carboxylase alpha | Acaca | 60581  | 1,26 | up   |
| 5868315 | 7070578 | 1057652 | acetyl-coenzyme A carboxylase alpha | Acaca | 60581  | 1,15 | up   |
| 5868921 | 7070578 | 1057687 | acetyl-coenzyme A carboxylase alpha | Acaca | 60581  | 1,03 | up   |
| 5890800 | 7070578 | 1057672 | acetyl-coenzyme A carboxylase alpha | Acaca | 60581  | 1,09 | down |
| 5956967 | 7070578 | 1057683 | acetyl-coenzyme A carboxylase alpha | Acaca | 60581  | 1,13 | down |
| 5972453 | 7070578 | 1057668 | acetyl-coenzyme A carboxylase alpha | Acaca | 60581  | 1,02 | up   |
| 5985332 | 7070578 | 1057655 | acetyl-coenzyme A carboxylase alpha | Acaca | 60581  | 1,30 | up   |
| 6039940 | 7070578 | 1057670 | acetyl-coenzyme A carboxylase alpha | Acaca | 60581  | 1,22 | up   |

|         |         |         |                                     |       |        |      |      |
|---------|---------|---------|-------------------------------------|-------|--------|------|------|
| 6053186 | 7070578 | 1057658 | acetyl-coenzyme A carboxylase alpha | Acaca | 60581  | 1,02 | up   |
| 6068954 | 7070578 | 1057639 | acetyl-coenzyme A carboxylase alpha | Acaca | 60581  | 1,27 | down |
| 6069279 | 7070578 | 1057674 | acetyl-coenzyme A carboxylase alpha | Acaca | 60581  | 1,02 | down |
| 6097459 | 7070578 | 1057660 | acetyl-coenzyme A carboxylase alpha | Acaca | 60581  | 1,08 | down |
| 6156403 | 7070578 | 1057635 | acetyl-coenzyme A carboxylase alpha | Acaca | 60581  | 1,04 | up   |
| 6157178 | 7070578 | 1057677 | acetyl-coenzyme A carboxylase alpha | Acaca | 60581  | 1,52 | down |
| 6175024 | 7070578 | 1057644 | acetyl-coenzyme A carboxylase alpha | Acaca | 60581  | 1,05 | down |
| 6199415 | 7070578 | 1057657 | acetyl-coenzyme A carboxylase alpha | Acaca | 60581  | 1,01 | up   |
| 6233634 | 7070578 | 1057666 | acetyl-coenzyme A carboxylase alpha | Acaca | 60581  | 1,22 | up   |
| 6271453 | 7070578 | 1057675 | acetyl-coenzyme A carboxylase alpha | Acaca | 60581  | 1,20 | down |
| 6280273 | 7070578 | 1057673 | acetyl-coenzyme A carboxylase alpha | Acaca | 60581  | 1,04 | down |
| 6299965 | 7070578 | 1057662 | acetyl-coenzyme A carboxylase alpha | Acaca | 60581  | 1,03 | up   |
| 6324397 | 7070578 | 1057671 | acetyl-coenzyme A carboxylase alpha | Acaca | 60581  | 1,29 | down |
| 6354068 | 7070578 | 1057649 | acetyl-coenzyme A carboxylase alpha | Acaca | 60581  | 1,05 | down |
| 6407742 | 7070578 | 1057640 | acetyl-coenzyme A carboxylase alpha | Acaca | 60581  | 1,01 | up   |
| 6419249 | 7070578 | 1057647 | acetyl-coenzyme A carboxylase alpha | Acaca | 60581  | 1,17 | up   |
| 6430381 | 7070578 | 1057678 | acetyl-coenzyme A carboxylase alpha | Acaca | 60581  | 1,25 | down |
| 6489591 | 7070578 | 1057659 | acetyl-coenzyme A carboxylase alpha | Acaca | 60581  | 1,04 | up   |
| 6528184 | 7070578 | 1057651 | acetyl-coenzyme A carboxylase alpha | Acaca | 60581  | 1,18 | down |
| 6538769 | 7070578 | 1057638 | acetyl-coenzyme A carboxylase alpha | Acaca | 60581  | 1,43 | up   |
| 6569456 | 7070578 | 1057679 | acetyl-coenzyme A carboxylase alpha | Acaca | 60581  | 1,18 | down |
| 6572132 | 7070578 | 1057643 | acetyl-coenzyme A carboxylase alpha | Acaca | 60581  | 1,16 | up   |
| 6583024 | 7070578 | 1057682 | acetyl-coenzyme A carboxylase alpha | Acaca | 60581  | 1,06 | up   |
| 6587582 | 7070578 | 1057656 | acetyl-coenzyme A carboxylase alpha | Acaca | 60581  | 1,10 | up   |
| 6614798 | 7070578 | 1057684 | acetyl-coenzyme A carboxylase alpha | Acaca | 60581  | 1,13 | up   |
| 6664006 | 7070578 | 1057645 | acetyl-coenzyme A carboxylase alpha | Acaca | 60581  | 1,28 | down |
| 6671394 | 7070578 | 1057654 | acetyl-coenzyme A carboxylase alpha | Acaca | 60581  | 1,01 | up   |
| 6702267 | 7070578 | 1057642 | acetyl-coenzyme A carboxylase alpha | Acaca | 60581  | 1,09 | up   |
| 6719711 | 7070578 | 1057641 | acetyl-coenzyme A carboxylase alpha | Acaca | 60581  | 1,74 | up   |
| 6722456 | 7070578 | 1057637 | acetyl-coenzyme A carboxylase alpha | Acaca | 60581  | 1,12 | down |
| 6737186 | 7070578 | 1057669 | acetyl-coenzyme A carboxylase alpha | Acaca | 60581  | 1,31 | up   |
| 5630153 | 7229963 | 1447341 | acid phosphatase 2, lysosomal       | Acp2  | 24162  | 2,71 | up   |
| 5893969 | 7229963 | 1447340 | acid phosphatase 2, lysosomal       | Acp2  | 24162  | 1,21 | down |
| 5902847 | 7229963 | 1447345 | acid phosphatase 2, lysosomal       | Acp2  | 24162  | 1,07 | up   |
| 5973257 | 7229963 | 1447342 | acid phosphatase 2, lysosomal       | Acp2  | 24162  | 1,84 | down |
| 6082247 | 7229963 | 1447344 | acid phosphatase 2, lysosomal       | Acp2  | 24162  | 1,21 | down |
| 6120962 | 7229963 | 1447347 | acid phosphatase 2, lysosomal       | Acp2  | 24162  | 1,13 | down |
| 6121654 | 7229963 | 1447345 | acid phosphatase 2, lysosomal       | Acp2  | 24162  | 1,24 | down |
| 6381886 | 7229963 | 1447348 | acid phosphatase 2, lysosomal       | Acp2  | 24162  | 1,15 | up   |
| 6416213 | 7229963 | 1447343 | acid phosphatase 2, lysosomal       | Acp2  | 24162  | 1,44 | down |
| 6518943 | 7229963 | 1447339 | acid phosphatase 2, lysosomal       | Acp2  | 24162  | 1,15 | up   |
| 6563748 | 7229963 | 1447346 | acid phosphatase 2, lysosomal       | Acp2  | 24162  | 1,03 | down |
| 6681933 | 7229963 | 1447349 | acid phosphatase 2, lysosomal       | Acp2  | 24162  | 1,09 | up   |
| 5626403 | 7050655 | 1011011 | acid phosphatase, testicular        | Acpt  | 308569 | 1,00 | down |
| 5626443 | 7050655 | 1011014 | acid phosphatase, testicular        | Acpt  | 308569 | 1,30 | up   |
| 5634014 | 7050655 | 1011005 | acid phosphatase, testicular        | Acpt  | 308569 | 1,03 | down |
| 5691110 | 7050655 | 1011008 | acid phosphatase, testicular        | Acpt  | 308569 | 1,07 | down |
| 5792785 | 7050655 | 1011013 | acid phosphatase, testicular        | Acpt  | 308569 | 1,23 | up   |
| 5897621 | 7050655 | 1011004 | acid phosphatase, testicular        | Acpt  | 308569 | 1,31 | up   |
| 6089727 | 7050655 | 1011006 | acid phosphatase, testicular        | Acpt  | 308569 | 1,37 | up   |
| 6312918 | 7050655 | 1011010 | acid phosphatase, testicular        | Acpt  | 308569 | 1,01 | up   |
| 6331974 | 7050655 | 1011010 | acid phosphatase, testicular        | Acpt  | 308569 | 1,16 | up   |
| 6486727 | 7050655 | 1011004 | acid phosphatase, testicular        | Acpt  | 308569 | 1,08 | down |
| 6493444 | 7050655 | 1011006 | acid phosphatase, testicular        | Acpt  | 308569 | 1,11 | up   |
| 6505718 | 7050655 | 1011003 | acid phosphatase, testicular        | Acpt  | 308569 | 1,57 | up   |
| 6531251 | 7050655 | 1011013 | acid phosphatase, testicular        | Acpt  | 308569 | 1,57 | down |

|         |         |         |                                                                  |        |        |      |      |
|---------|---------|---------|------------------------------------------------------------------|--------|--------|------|------|
| 6545405 | 7050655 | 1011002 | acid phosphatase, testicular                                     | Acpt   | 308569 | 1,09 | up   |
| 6570668 | 7050655 | 1011009 | acid phosphatase, testicular                                     | Acpt   | 308569 | 1,03 | down |
| 6685714 | 7050655 | 1011007 | acid phosphatase, testicular                                     | Acpt   | 308569 | 1,01 | up   |
| 5692997 | 7197027 | 1367770 | acidic (leucine-rich) nuclear phosphoprotein 32 family, member E | Anp32e | 361999 | 1,21 | down |
| 6105888 | 7197027 | 1367769 | acidic (leucine-rich) nuclear phosphoprotein 32 family, member E | Anp32e | 361999 | 1,03 | down |
| 6163548 | 7197027 | 1367772 | acidic (leucine-rich) nuclear phosphoprotein 32 family, member E | Anp32e | 361999 | 2,43 | down |
| 6235551 | 7197027 | 1367771 | acidic (leucine-rich) nuclear phosphoprotein 32 family, member E | Anp32e | 361999 | 1,28 | up   |
| 6395308 | 7197027 | 1367768 | acidic (leucine-rich) nuclear phosphoprotein 32 family, member E | Anp32e | 361999 | 1,33 | up   |
| 6560527 | 7197027 | 1367770 | acidic (leucine-rich) nuclear phosphoprotein 32 family, member E | Anp32e | 361999 | 1,35 | down |
| 6585695 | 7197027 | 1367767 | acidic (leucine-rich) nuclear phosphoprotein 32 family, member E | Anp32e | 361999 | 1,20 | down |
| 6595071 | 7197027 | 1367766 | acidic (leucine-rich) nuclear phosphoprotein 32 family, member E | Anp32e | 361999 | 1,73 | up   |
| 5650865 | 7127103 | 1194293 | actin binding LIM protein family, member 2                       | Ablim2 | 360958 | 2,23 | up   |
| 5699391 | 7127103 | 1194306 | actin binding LIM protein family, member 2                       | Ablim2 | 360958 | 1,45 | up   |
| 5820231 | 7127103 | 1194297 | actin binding LIM protein family, member 2                       | Ablim2 | 360958 | 1,21 | up   |
| 5830220 | 7127103 | 1194299 | actin binding LIM protein family, member 2                       | Ablim2 | 360958 | 1,13 | down |
| 5830969 | 7127103 | 1194300 | actin binding LIM protein family, member 2                       | Ablim2 | 360958 | 1,21 | up   |
| 5854021 | 7127103 | 1194301 | actin binding LIM protein family, member 2                       | Ablim2 | 360958 | 1,18 | up   |
| 5959460 | 7127103 | 1194296 | actin binding LIM protein family, member 2                       | Ablim2 | 360958 | 1,67 | down |
| 6032974 | 7127103 | 1194294 | actin binding LIM protein family, member 2                       | Ablim2 | 360958 | 1,01 | up   |
| 6057062 | 7127103 | 1194299 | actin binding LIM protein family, member 2                       | Ablim2 | 360958 | 1,06 | down |
| 6137274 | 7127103 | 1194303 | actin binding LIM protein family, member 2                       | Ablim2 | 360958 | 1,09 | up   |
| 6193571 | 7127103 | 1194292 | actin binding LIM protein family, member 2                       | Ablim2 | 360958 | 1,42 | down |
| 6362339 | 7127103 | 1194295 | actin binding LIM protein family, member 2                       | Ablim2 | 360958 | 1,98 | up   |
| 6374131 | 7127103 | 1194302 | actin binding LIM protein family, member 2                       | Ablim2 | 360958 | 1,11 | down |
| 6378579 | 7127103 | 1194304 | actin binding LIM protein family, member 2                       | Ablim2 | 360958 | 1,04 | down |
| 6412100 | 7127103 | 1194305 | actin binding LIM protein family, member 2                       | Ablim2 | 360958 | 1,04 | down |
| 6469587 | 7127103 | 1194307 | actin binding LIM protein family, member 2                       | Ablim2 | 360958 | 1,41 | up   |
| 6511931 | 7127103 | 1194298 | actin binding LIM protein family, member 2                       | Ablim2 | 360958 | 1,32 | down |
| 6639974 | 7127103 | 1194291 | actin binding LIM protein family, member 2                       | Ablim2 | 360958 | 1,36 | up   |
| 5635809 | 7127099 | 1194280 | actin filament associated protein 1                              | Afap1  | 140935 | 1,19 | up   |
| 5718019 | 7127099 | 1194275 | actin filament associated protein 1                              | Afap1  | 140935 | 1,09 | up   |
| 5855894 | 7127099 | 1194272 | actin filament associated protein 1                              | Afap1  | 140935 | 1,01 | down |
| 5993782 | 7127099 | 1194283 | actin filament associated protein 1                              | Afap1  | 140935 | 1,07 | down |
| 6028501 | 7127099 | 1194278 | actin filament associated protein 1                              | Afap1  | 140935 | 1,23 | up   |
| 6125604 | 7127099 | 1194272 | actin filament associated protein 1                              | Afap1  | 140935 | 1,79 | up   |
| 6170995 | 7127099 | 1194286 | actin filament associated protein 1                              | Afap1  | 140935 | 1,76 | down |
| 6207579 | 7127099 | 1194277 | actin filament associated protein 1                              | Afap1  | 140935 | 1,72 | up   |
| 6258272 | 7127099 | 1194285 | actin filament associated protein 1                              | Afap1  | 140935 | 1,08 | up   |
| 6266233 | 7127099 | 1194285 | actin filament associated protein 1                              | Afap1  | 140935 | 1,11 | up   |
| 6372159 | 7127099 | 1194287 | actin filament associated protein 1                              | Afap1  | 140935 | 1,41 | down |
| 6524269 | 7127099 | 1194276 | actin filament associated protein 1                              | Afap1  | 140935 | 1,22 | down |
| 6534861 | 7127099 | 1194284 | actin filament associated protein 1                              | Afap1  | 140935 | 1,07 | up   |
| 6536119 | 7127099 | 1194279 | actin filament associated protein 1                              | Afap1  | 140935 | 1,37 | up   |
| 6579224 | 7127099 | 1194273 | actin filament associated protein 1                              | Afap1  | 140935 | 1,03 | up   |
| 6621932 | 7127099 | 1194282 | actin filament associated protein 1                              | Afap1  | 140935 | 1,10 | up   |
| 6629716 | 7127099 | 1194281 | actin filament associated protein 1                              | Afap1  | 140935 | 1,62 | down |
| 6644822 | 7127099 | 1194271 | actin filament associated protein 1                              | Afap1  | 140935 | 1,08 | down |
| 6651972 | 7127099 | 1194274 | actin filament associated protein 1                              | Afap1  | 140935 | 2,13 | down |
| 5622270 | 7243253 | 1481233 | actin, alpha, cardiac muscle 1                                   | Actc1  | 29275  | 1,13 | down |
| 5659483 | 7243253 | 1481235 | actin, alpha, cardiac muscle 1                                   | Actc1  | 29275  | 1,16 | down |
| 6045991 | 7243253 | 1481233 | actin, alpha, cardiac muscle 1                                   | Actc1  | 29275  | 1,18 | down |
| 6163375 | 7243253 | 1481232 | actin, alpha, cardiac muscle 1                                   | Actc1  | 29275  | 1,01 | up   |
| 6223516 | 7243253 | 1481231 | actin, alpha, cardiac muscle 1                                   | Actc1  | 29275  | 1,12 | up   |
| 6276633 | 7243253 | 1481234 | actin, alpha, cardiac muscle 1                                   | Actc1  | 29275  | 1,16 | down |
| 6291293 | 7243253 | 1481236 | actin, alpha, cardiac muscle 1                                   | Actc1  | 29275  | 1,07 | up   |
| 6309726 | 7243253 | 1481236 | actin, alpha, cardiac muscle 1                                   | Actc1  | 29275  | 1,71 | down |

|         |         |         |                                |        |        |      |      |
|---------|---------|---------|--------------------------------|--------|--------|------|------|
| 6318563 | 7243253 | 1481235 | actin, alpha, cardiac muscle 1 | Actc1  | 29275  | 1,23 | down |
| 6351826 | 7243253 | 1481229 | actin, alpha, cardiac muscle 1 | Actc1  | 29275  | 1,36 | up   |
| 6544547 | 7243253 | 1481230 | actin, alpha, cardiac muscle 1 | Actc1  | 29275  | 1,03 | up   |
| 5689178 | 7064134 | 1041414 | actin-binding LIM protein 1    | Ablim1 | 307989 | 1,08 | up   |
| 5808607 | 7064134 | 1041422 | actin-binding LIM protein 1    | Ablim1 | 307989 | 1,38 | up   |
| 5827823 | 7064134 | 1041429 | actin-binding LIM protein 1    | Ablim1 | 307989 | 1,02 | down |
| 5953826 | 7064134 | 1041438 | actin-binding LIM protein 1    | Ablim1 | 307989 | 1,05 | up   |
| 5989057 | 7064134 | 1041418 | actin-binding LIM protein 1    | Ablim1 | 307989 | 1,09 | up   |
| 6042115 | 7064134 | 1041419 | actin-binding LIM protein 1    | Ablim1 | 307989 | 1,08 | down |
| 6105617 | 7064134 | 1041438 | actin-binding LIM protein 1    | Ablim1 | 307989 | 1,17 | up   |
| 6220311 | 7064134 | 1041430 | actin-binding LIM protein 1    | Ablim1 | 307989 | 1,09 | down |
| 6223297 | 7064134 | 1041428 | actin-binding LIM protein 1    | Ablim1 | 307989 | 1,14 | down |
| 6339126 | 7064134 | 1041420 | actin-binding LIM protein 1    | Ablim1 | 307989 | 1,22 | up   |
| 6391435 | 7064134 | 1041436 | actin-binding LIM protein 1    | Ablim1 | 307989 | 1,16 | down |
| 6463497 | 7064134 | 1041427 | actin-binding LIM protein 1    | Ablim1 | 307989 | 1,10 | down |
| 6549708 | 7064134 | 1041415 | actin-binding LIM protein 1    | Ablim1 | 307989 | 1,04 | up   |
| 6687015 | 7064134 | 1041423 | actin-binding LIM protein 1    | Ablim1 | 307989 | 1,15 | down |
| 6692455 | 7064134 | 1041442 | actin-binding LIM protein 1    | Ablim1 | 307989 | 1,07 | up   |
| 6741722 | 7064134 | 1041417 | actin-binding LIM protein 1    | Ablim1 | 307989 | 1,10 | up   |
| 5637385 | 7159027 | 1272738 | actinin alpha 2                | Actn2  | 291245 | 1,02 | down |
| 5729278 | 7159027 | 1272737 | actinin alpha 2                | Actn2  | 291245 | 1,02 | down |
| 5785617 | 7159027 | 1272739 | actinin alpha 2                | Actn2  | 291245 | 1,09 | up   |
| 5819213 | 7159027 | 1272730 | actinin alpha 2                | Actn2  | 291245 | 1,06 | up   |
| 5843204 | 7159027 | 1272733 | actinin alpha 2                | Actn2  | 291245 | 1,02 | up   |
| 5844822 | 7159027 | 1272726 | actinin alpha 2                | Actn2  | 291245 | 1,07 | up   |
| 5917243 | 7159027 | 1272734 | actinin alpha 2                | Actn2  | 291245 | 1,01 | up   |
| 5922584 | 7159027 | 1272729 | actinin alpha 2                | Actn2  | 291245 | 1,04 | down |
| 5947655 | 7159027 | 1272723 | actinin alpha 2                | Actn2  | 291245 | 2,23 | up   |
| 5965731 | 7159027 | 1272727 | actinin alpha 2                | Actn2  | 291245 | 1,34 | down |
| 6089999 | 7159027 | 1272718 | actinin alpha 2                | Actn2  | 291245 | 1,19 | down |
| 6120312 | 7159027 | 1272712 | actinin alpha 2                | Actn2  | 291245 | 1,13 | down |
| 6133656 | 7159027 | 1272716 | actinin alpha 2                | Actn2  | 291245 | 1,17 | up   |
| 6275047 | 7159027 | 1272728 | actinin alpha 2                | Actn2  | 291245 | 1,01 | down |
| 6305320 | 7159027 | 1272722 | actinin alpha 2                | Actn2  | 291245 | 1,04 | down |
| 6337887 | 7159027 | 1272735 | actinin alpha 2                | Actn2  | 291245 | 1,01 | up   |
| 6350792 | 7159027 | 1272722 | actinin alpha 2                | Actn2  | 291245 | 1,13 | down |
| 6433237 | 7159027 | 1272720 | actinin alpha 2                | Actn2  | 291245 | 1,11 | up   |
| 6453979 | 7159027 | 1272736 | actinin alpha 2                | Actn2  | 291245 | 1,45 | up   |
| 6467290 | 7159027 | 1272732 | actinin alpha 2                | Actn2  | 291245 | 1,15 | down |
| 6516443 | 7159027 | 1272724 | actinin alpha 2                | Actn2  | 291245 | 1,42 | down |
| 6580137 | 7159027 | 1272717 | actinin alpha 2                | Actn2  | 291245 | 1,11 | down |
| 6604146 | 7159027 | 1272712 | actinin alpha 2                | Actn2  | 291245 | 1,26 | down |
| 6608969 | 7159027 | 1272739 | actinin alpha 2                | Actn2  | 291245 | 1,10 | down |
| 5744738 | 7059644 | 1030655 | actinin alpha 3                | Actn3  | 171009 | 1,31 | up   |
| 5836889 | 7059644 | 1030651 | actinin alpha 3                | Actn3  | 171009 | 1,26 | up   |
| 5940583 | 7059644 | 1030664 | actinin alpha 3                | Actn3  | 171009 | 1,40 | down |
| 6009251 | 7059644 | 1030653 | actinin alpha 3                | Actn3  | 171009 | 1,65 | up   |
| 6018411 | 7059644 | 1030667 | actinin alpha 3                | Actn3  | 171009 | 2,07 | up   |
| 6068642 | 7059644 | 1030665 | actinin alpha 3                | Actn3  | 171009 | 1,11 | down |
| 6098779 | 7059644 | 1030666 | actinin alpha 3                | Actn3  | 171009 | 1,23 | up   |
| 6104754 | 7059644 | 1030662 | actinin alpha 3                | Actn3  | 171009 | 1,33 | down |
| 6113170 | 7059644 | 1030661 | actinin alpha 3                | Actn3  | 171009 | 1,22 | up   |
| 6296912 | 7059644 | 1030650 | actinin alpha 3                | Actn3  | 171009 | 1,33 | down |
| 6309439 | 7059644 | 1030647 | actinin alpha 3                | Actn3  | 171009 | 1,03 | up   |
| 6333922 | 7059644 | 1030668 | actinin alpha 3                | Actn3  | 171009 | 1,37 | down |
| 6393792 | 7059644 | 1030659 | actinin alpha 3                | Actn3  | 171009 | 1,04 | down |



|         |         |         |                                       |        |        |      |      |
|---------|---------|---------|---------------------------------------|--------|--------|------|------|
| 6464756 | 7059644 | 1030657 | actinin alpha 3                       | Actn3  | 171009 | 1,17 | up   |
| 6470086 | 7059644 | 1030648 | actinin alpha 3                       | Actn3  | 171009 | 1,00 | up   |
| 6472146 | 7059644 | 1030658 | actinin alpha 3                       | Actn3  | 171009 | 1,10 | up   |
| 6489001 | 7059644 | 1030668 | actinin alpha 3                       | Actn3  | 171009 | 1,14 | down |
| 6514072 | 7059644 | 1030652 | actinin alpha 3                       | Actn3  | 171009 | 1,70 | up   |
| 6519949 | 7059644 | 1030649 | actinin alpha 3                       | Actn3  | 171009 | 1,10 | down |
| 6593287 | 7059644 | 1030654 | actinin alpha 3                       | Actn3  | 171009 | 1,19 | down |
| 6650924 | 7059644 | 1030660 | actinin alpha 3                       | Actn3  | 171009 | 1,00 | up   |
| 6661592 | 7059644 | 1030656 | actinin alpha 3                       | Actn3  | 171009 | 1,06 | down |
| 6740877 | 7059644 | 1030663 | actinin alpha 3                       | Actn3  | 171009 | 2,04 | down |
| 5666514 | 7192902 | 1357763 | actin-like 6A                         | Actl6a | 361925 | 1,21 | down |
| 5783745 | 7192902 | 1357753 | actin-like 6A                         | Actl6a | 361925 | 1,02 | down |
| 5841337 | 7192902 | 1357757 | actin-like 6A                         | Actl6a | 361925 | 1,12 | up   |
| 5859384 | 7192902 | 1357766 | actin-like 6A                         | Actl6a | 361925 | 1,90 | down |
| 5876724 | 7192902 | 1357766 | actin-like 6A                         | Actl6a | 361925 | 1,52 | down |
| 5886998 | 7192902 | 1357762 | actin-like 6A                         | Actl6a | 361925 | 1,13 | down |
| 5940955 | 7192902 | 1357751 | actin-like 6A                         | Actl6a | 361925 | 1,14 | up   |
| 6061409 | 7192902 | 1357764 | actin-like 6A                         | Actl6a | 361925 | 1,33 | down |
| 6085654 | 7192902 | 1357759 | actin-like 6A                         | Actl6a | 361925 | 1,33 | up   |
| 6306794 | 7192902 | 1357758 | actin-like 6A                         | Actl6a | 361925 | 1,03 | up   |
| 6312803 | 7192902 | 1357749 | actin-like 6A                         | Actl6a | 361925 | 2,27 | down |
| 6369130 | 7192902 | 1357765 | actin-like 6A                         | Actl6a | 361925 | 1,06 | down |
| 6438730 | 7192902 | 1357752 | actin-like 6A                         | Actl6a | 361925 | 1,03 | up   |
| 6603439 | 7192902 | 1357754 | actin-like 6A                         | Actl6a | 361925 | 1,28 | up   |
| 5745613 | 7258176 | 1518214 | activation-induced cytidine deaminase | aicda  | 399679 | 1,15 | down |
| 5782945 | 7258176 | 1518213 | activation-induced cytidine deaminase | aicda  | 399679 | 1,01 | up   |
| 5990770 | 7258176 | 1518209 | activation-induced cytidine deaminase | aicda  | 399679 | 1,15 | up   |
| 6055542 | 7258176 | 1518218 | activation-induced cytidine deaminase | aicda  | 399679 | 1,19 | up   |
| 6218045 | 7258176 | 1518211 | activation-induced cytidine deaminase | aicda  | 399679 | 1,32 | down |
| 6331795 | 7258176 | 1518215 | activation-induced cytidine deaminase | aicda  | 399679 | 1,01 | up   |
| 6542254 | 7258176 | 1518217 | activation-induced cytidine deaminase | aicda  | 399679 | 1,41 | down |
| 6690048 | 7258176 | 1518216 | activation-induced cytidine deaminase | aicda  | 399679 | 2,05 | down |
| 5638684 | 7070140 | 1056519 | active BCR-related gene               | Abr    | 287537 | 1,08 | up   |
| 5647013 | 7070140 | 1056520 | active BCR-related gene               | Abr    | 287537 | 1,04 | up   |
| 5658902 | 7070140 | 1056517 | active BCR-related gene               | Abr    | 287537 | 1,20 | up   |
| 5666556 | 7070140 | 1056535 | active BCR-related gene               | Abr    | 287537 | 1,15 | up   |
| 5730083 | 7070140 | 1056534 | active BCR-related gene               | Abr    | 287537 | 1,16 | down |
| 5790693 | 7070140 | 1056521 | active BCR-related gene               | Abr    | 287537 | 1,16 | down |
| 5875425 | 7070140 | 1056515 | active BCR-related gene               | Abr    | 287537 | 1,32 | down |
| 6038215 | 7070140 | 1056530 | active BCR-related gene               | Abr    | 287537 | 1,02 | down |
| 6086723 | 7070140 | 1056500 | active BCR-related gene               | Abr    | 287537 | 1,12 | up   |
| 6112653 | 7070140 | 1056531 | active BCR-related gene               | Abr    | 287537 | 1,01 | down |
| 6222851 | 7070140 | 1056481 | active BCR-related gene               | Abr    | 287537 | 1,11 | up   |
| 6250380 | 7070140 | 1056522 | active BCR-related gene               | Abr    | 287537 | 1,02 | down |
| 6260934 | 7070140 | 1056513 | active BCR-related gene               | Abr    | 287537 | 1,01 | up   |
| 6316601 | 7070140 | 1056514 | active BCR-related gene               | Abr    | 287537 | 1,20 | down |
| 6348329 | 7070140 | 1056503 | active BCR-related gene               | Abr    | 287537 | 1,23 | up   |
| 6349715 | 7070140 | 1056518 | active BCR-related gene               | Abr    | 287537 | 1,04 | up   |
| 6505012 | 7070140 | 1056512 | active BCR-related gene               | Abr    | 287537 | 1,00 | up   |
| 6513247 | 7070140 | 1056495 | active BCR-related gene               | Abr    | 287537 | 1,03 | down |
| 6520465 | 7070140 | 1056533 | active BCR-related gene               | Abr    | 287537 | 1,00 | down |
| 6522123 | 7070140 | 1056529 | active BCR-related gene               | Abr    | 287537 | 1,21 | down |
| 6546936 | 7070140 | 1056532 | active BCR-related gene               | Abr    | 287537 | 1,03 | down |
| 6557762 | 7070140 | 1056535 | active BCR-related gene               | Abr    | 287537 | 1,69 | up   |
| 6563437 | 7070140 | 1056495 | active BCR-related gene               | Abr    | 287537 | 1,25 | up   |
| 6571799 | 7070140 | 1056531 | active BCR-related gene               | Abr    | 287537 | 1,26 | down |

|         |         |         |                                                           |        |        |      |      |
|---------|---------|---------|-----------------------------------------------------------|--------|--------|------|------|
| 6725943 | 7070140 | 1056506 | active BCR-related gene                                   | Abr    | 287537 | 1,01 | up   |
| 6732437 | 7070140 | 1056502 | active BCR-related gene                                   | Abr    | 287537 | 1,08 | down |
| 5700747 | 7320875 | 1674491 | activin A receptor type II-like 1                         | Acvrl1 | 25237  | 1,06 | down |
| 5887998 | 7320875 | 1674485 | activin A receptor type II-like 1                         | Acvrl1 | 25237  | 1,04 | up   |
| 5905754 | 7320875 | 1674484 | activin A receptor type II-like 1                         | Acvrl1 | 25237  | 1,65 | down |
| 5906254 | 7320875 | 1674489 | activin A receptor type II-like 1                         | Acvrl1 | 25237  | 1,53 | down |
| 6032294 | 7320875 | 1674496 | activin A receptor type II-like 1                         | Acvrl1 | 25237  | 1,38 | down |
| 6038926 | 7320875 | 1674493 | activin A receptor type II-like 1                         | Acvrl1 | 25237  | 1,14 | up   |
| 6059289 | 7320875 | 1674494 | activin A receptor type II-like 1                         | Acvrl1 | 25237  | 1,02 | down |
| 6208984 | 7320875 | 1674484 | activin A receptor type II-like 1                         | Acvrl1 | 25237  | 1,07 | down |
| 6210692 | 7320875 | 1674495 | activin A receptor type II-like 1                         | Acvrl1 | 25237  | 1,09 | up   |
| 6254818 | 7320875 | 1674487 | activin A receptor type II-like 1                         | Acvrl1 | 25237  | 1,05 | up   |
| 6290228 | 7320875 | 1674486 | activin A receptor type II-like 1                         | Acvrl1 | 25237  | 2,25 | down |
| 6330185 | 7320875 | 1674492 | activin A receptor type II-like 1                         | Acvrl1 | 25237  | 1,32 | up   |
| 6411582 | 7320875 | 1674488 | activin A receptor type II-like 1                         | Acvrl1 | 25237  | 1,07 | up   |
| 6461886 | 7320875 | 1674486 | activin A receptor type II-like 1                         | Acvrl1 | 25237  | 1,65 | down |
| 6493152 | 7320875 | 1674496 | activin A receptor type II-like 1                         | Acvrl1 | 25237  | 1,01 | down |
| 6521907 | 7320875 | 1674488 | activin A receptor type II-like 1                         | Acvrl1 | 25237  | 1,00 | up   |
| 6599185 | 7320875 | 1674496 | activin A receptor type II-like 1                         | Acvrl1 | 25237  | 1,09 | up   |
| 6619643 | 7320875 | 1674490 | activin A receptor type II-like 1                         | Acvrl1 | 25237  | 1,18 | up   |
| 6706907 | 7320875 | 1674497 | activin A receptor type II-like 1                         | Acvrl1 | 25237  | 1,17 | up   |
| 6717175 | 7320875 | 1674496 | activin A receptor type II-like 1                         | Acvrl1 | 25237  | 1,89 | down |
| 6728727 | 7320875 | 1674496 | activin A receptor type II-like 1                         | Acvrl1 | 25237  | 1,04 | up   |
| 5845547 | 7320883 | 1674518 | activin A receptor, type IB                               | Acvrlb | 29381  | 1,24 | up   |
| 5852692 | 7320883 | 1674512 | activin A receptor, type IB                               | Acvrlb | 29381  | 2,21 | up   |
| 5884711 | 7320883 | 1674513 | activin A receptor, type IB                               | Acvrlb | 29381  | 1,22 | up   |
| 6076457 | 7320883 | 1674520 | activin A receptor, type IB                               | Acvrlb | 29381  | 1,54 | down |
| 6337494 | 7320883 | 1674515 | activin A receptor, type IB                               | Acvrlb | 29381  | 1,64 | down |
| 6404497 | 7320883 | 1674519 | activin A receptor, type IB                               | Acvrlb | 29381  | 1,11 | up   |
| 6440473 | 7320883 | 1674514 | activin A receptor, type IB                               | Acvrlb | 29381  | 1,28 | down |
| 6674752 | 7320883 | 1674517 | activin A receptor, type IB                               | Acvrlb | 29381  | 1,04 | up   |
| 6717354 | 7320883 | 1674516 | activin A receptor, type IB                               | Acvrlb | 29381  | 1,65 | up   |
| 5620080 | 7036197 | 976329  | acyl-CoA synthetase medium-chain family member 2          | Acsm2  | 246263 | 1,03 | down |
| 5659649 | 7036197 | 976338  | acyl-CoA synthetase medium-chain family member 2          | Acsm2  | 246263 | 1,12 | up   |
| 5836324 | 7036197 | 976339  | acyl-CoA synthetase medium-chain family member 2          | Acsm2  | 246263 | 1,08 | down |
| 5895364 | 7036197 | 976337  | acyl-CoA synthetase medium-chain family member 2          | Acsm2  | 246263 | 1,10 | down |
| 5920896 | 7036197 | 976335  | acyl-CoA synthetase medium-chain family member 2          | Acsm2  | 246263 | 1,01 | up   |
| 6063413 | 7036197 | 976328  | acyl-CoA synthetase medium-chain family member 2          | Acsm2  | 246263 | 1,30 | down |
| 6099677 | 7036197 | 976336  | acyl-CoA synthetase medium-chain family member 2          | Acsm2  | 246263 | 2,59 | down |
| 6142843 | 7036197 | 976327  | acyl-CoA synthetase medium-chain family member 2          | Acsm2  | 246263 | 1,13 | down |
| 6159834 | 7036197 | 976331  | acyl-CoA synthetase medium-chain family member 2          | Acsm2  | 246263 | 1,01 | up   |
| 6276950 | 7036197 | 976333  | acyl-CoA synthetase medium-chain family member 2          | Acsm2  | 246263 | 1,40 | up   |
| 6289944 | 7036197 | 976332  | acyl-CoA synthetase medium-chain family member 2          | Acsm2  | 246263 | 1,01 | down |
| 6375222 | 7036197 | 976334  | acyl-CoA synthetase medium-chain family member 2          | Acsm2  | 246263 | 1,11 | down |
| 6482535 | 7036197 | 976330  | acyl-CoA synthetase medium-chain family member 2          | Acsm2  | 246263 | 1,25 | up   |
| 6692999 | 7036197 | 976333  | acyl-CoA synthetase medium-chain family member 2          | Acsm2  | 246263 | 1,06 | up   |
| 6718134 | 7036197 | 976326  | acyl-CoA synthetase medium-chain family member 2          | Acsm2  | 246263 | 1,31 | up   |
| 5839203 | 7247817 | 1492010 | acyl-CoA thioesterase 8                                   | Acot8  | 170588 | 1,84 | down |
| 5937196 | 7247817 | 1492006 | acyl-CoA thioesterase 8                                   | Acot8  | 170588 | 2,28 | up   |
| 6001054 | 7247817 | 1492005 | acyl-CoA thioesterase 8                                   | Acot8  | 170588 | 1,14 | down |
| 6118815 | 7247817 | 1492009 | acyl-CoA thioesterase 8                                   | Acot8  | 170588 | 1,24 | up   |
| 6245672 | 7247817 | 1492007 | acyl-CoA thioesterase 8                                   | Acot8  | 170588 | 1,19 | down |
| 6299947 | 7247817 | 1492010 | acyl-CoA thioesterase 8                                   | Acot8  | 170588 | 1,53 | up   |
| 6475245 | 7247817 | 1492005 | acyl-CoA thioesterase 8                                   | Acot8  | 170588 | 1,32 | down |
| 6546299 | 7247817 | 1492008 | acyl-CoA thioesterase 8                                   | Acot8  | 170588 | 1,05 | down |
| 5692122 | 7215892 | 1412696 | acyl-Coenzyme A dehydrogenase, C-4 to C-12 straight chain | Acadm  | 24158  | 1,23 | up   |

|         |         |         |                                                            |          |        |      |      |
|---------|---------|---------|------------------------------------------------------------|----------|--------|------|------|
| 5851755 | 7215892 | 1412695 | acyl-Coenzyme A dehydrogenase, C-4 to C-12 straight chain  | Acadm    | 24158  | 1,27 | down |
| 6114019 | 7215892 | 1412692 | acyl-Coenzyme A dehydrogenase, C-4 to C-12 straight chain  | Acadm    | 24158  | 1,35 | up   |
| 6118015 | 7215892 | 1412691 | acyl-Coenzyme A dehydrogenase, C-4 to C-12 straight chain  | Acadm    | 24158  | 1,66 | down |
| 6142506 | 7215892 | 1412690 | acyl-Coenzyme A dehydrogenase, C-4 to C-12 straight chain  | Acadm    | 24158  | 1,11 | up   |
| 6245974 | 7215892 | 1412699 | acyl-Coenzyme A dehydrogenase, C-4 to C-12 straight chain  | Acadm    | 24158  | 1,58 | down |
| 6323511 | 7215892 | 1412698 | acyl-Coenzyme A dehydrogenase, C-4 to C-12 straight chain  | Acadm    | 24158  | 1,14 | down |
| 6413195 | 7215892 | 1412688 | acyl-Coenzyme A dehydrogenase, C-4 to C-12 straight chain  | Acadm    | 24158  | 1,51 | down |
| 6428474 | 7215892 | 1412694 | acyl-Coenzyme A dehydrogenase, C-4 to C-12 straight chain  | Acadm    | 24158  | 1,27 | up   |
| 6539184 | 7215892 | 1412687 | acyl-Coenzyme A dehydrogenase, C-4 to C-12 straight chain  | Acadm    | 24158  | 2,23 | down |
| 6626602 | 7215892 | 1412689 | acyl-Coenzyme A dehydrogenase, C-4 to C-12 straight chain  | Acadm    | 24158  | 1,25 | down |
| 6667309 | 7215892 | 1412697 | acyl-Coenzyme A dehydrogenase, C-4 to C-12 straight chain  | Acadm    | 24158  | 1,42 | up   |
| 6712992 | 7215892 | 1412693 | acyl-Coenzyme A dehydrogenase, C-4 to C-12 straight chain  | Acadm    | 24158  | 1,01 | down |
| 5678804 | 7037519 | 979404  | acyl-Coenzyme A dehydrogenase, short/branched chain        | Acadsb   | 25618  | 1,92 | up   |
| 5738939 | 7037519 | 979405  | acyl-Coenzyme A dehydrogenase, short/branched chain        | Acadsb   | 25618  | 1,04 | up   |
| 5777997 | 7037519 | 979414  | acyl-Coenzyme A dehydrogenase, short/branched chain        | Acadsb   | 25618  | 1,10 | down |
| 5838744 | 7037519 | 979408  | acyl-Coenzyme A dehydrogenase, short/branched chain        | Acadsb   | 25618  | 1,05 | down |
| 6215752 | 7037519 | 979405  | acyl-Coenzyme A dehydrogenase, short/branched chain        | Acadsb   | 25618  | 1,13 | up   |
| 6501515 | 7037519 | 979407  | acyl-Coenzyme A dehydrogenase, short/branched chain        | Acadsb   | 25618  | 1,03 | down |
| 6513446 | 7037519 | 979413  | acyl-Coenzyme A dehydrogenase, short/branched chain        | Acadsb   | 25618  | 1,09 | up   |
| 6529311 | 7037519 | 979406  | acyl-Coenzyme A dehydrogenase, short/branched chain        | Acadsb   | 25618  | 1,18 | down |
| 6547286 | 7037519 | 979409  | acyl-Coenzyme A dehydrogenase, short/branched chain        | Acadsb   | 25618  | 2,03 | down |
| 6628038 | 7037519 | 979411  | acyl-Coenzyme A dehydrogenase, short/branched chain        | Acadsb   | 25618  | 1,47 | down |
| 6668716 | 7037519 | 979410  | acyl-Coenzyme A dehydrogenase, short/branched chain        | Acadsb   | 25618  | 1,03 | up   |
| 6699996 | 7037519 | 979412  | acyl-Coenzyme A dehydrogenase, short/branched chain        | Acadsb   | 25618  | 1,35 | up   |
| 5647716 | 7146964 | 1243202 | ADAM metallopeptidase domain 3A (cyritestin 1)             | Adam3a   | 57021  | 1,26 | up   |
| 5715313 | 7146964 | 1243208 | ADAM metallopeptidase domain 3A (cyritestin 1)             | Adam3a   | 57021  | 1,47 | down |
| 5797536 | 7146964 | 1243206 | ADAM metallopeptidase domain 3A (cyritestin 1)             | Adam3a   | 57021  | 1,05 | down |
| 5930916 | 7146964 | 1243217 | ADAM metallopeptidase domain 3A (cyritestin 1)             | Adam3a   | 57021  | 1,21 | up   |
| 6043436 | 7146964 | 1243215 | ADAM metallopeptidase domain 3A (cyritestin 1)             | Adam3a   | 57021  | 1,16 | up   |
| 6065540 | 7146964 | 1243209 | ADAM metallopeptidase domain 3A (cyritestin 1)             | Adam3a   | 57021  | 1,53 | down |
| 6098452 | 7146964 | 1243210 | ADAM metallopeptidase domain 3A (cyritestin 1)             | Adam3a   | 57021  | 1,03 | down |
| 6104670 | 7146964 | 1243218 | ADAM metallopeptidase domain 3A (cyritestin 1)             | Adam3a   | 57021  | 1,42 | down |
| 6280411 | 7146964 | 1243208 | ADAM metallopeptidase domain 3A (cyritestin 1)             | Adam3a   | 57021  | 1,44 | down |
| 6346082 | 7146964 | 1243214 | ADAM metallopeptidase domain 3A (cyritestin 1)             | Adam3a   | 57021  | 1,02 | up   |
| 6352511 | 7146964 | 1243213 | ADAM metallopeptidase domain 3A (cyritestin 1)             | Adam3a   | 57021  | 1,02 | up   |
| 6362527 | 7146964 | 1243216 | ADAM metallopeptidase domain 3A (cyritestin 1)             | Adam3a   | 57021  | 1,33 | up   |
| 6395699 | 7146964 | 1243203 | ADAM metallopeptidase domain 3A (cyritestin 1)             | Adam3a   | 57021  | 1,08 | down |
| 6407654 | 7146964 | 1243200 | ADAM metallopeptidase domain 3A (cyritestin 1)             | Adam3a   | 57021  | 1,02 | up   |
| 6423354 | 7146964 | 1243200 | ADAM metallopeptidase domain 3A (cyritestin 1)             | Adam3a   | 57021  | 1,02 | down |
| 6455689 | 7146964 | 1243216 | ADAM metallopeptidase domain 3A (cyritestin 1)             | Adam3a   | 57021  | 1,45 | down |
| 6460283 | 7146964 | 1243204 | ADAM metallopeptidase domain 3A (cyritestin 1)             | Adam3a   | 57021  | 2,36 | down |
| 6464572 | 7146964 | 1243200 | ADAM metallopeptidase domain 3A (cyritestin 1)             | Adam3a   | 57021  | 1,01 | up   |
| 6464988 | 7146964 | 1243211 | ADAM metallopeptidase domain 3A (cyritestin 1)             | Adam3a   | 57021  | 1,04 | down |
| 6565324 | 7146964 | 1243212 | ADAM metallopeptidase domain 3A (cyritestin 1)             | Adam3a   | 57021  | 1,59 | down |
| 6582653 | 7146964 | 1243213 | ADAM metallopeptidase domain 3A (cyritestin 1)             | Adam3a   | 57021  | 1,02 | up   |
| 6610402 | 7146964 | 1243219 | ADAM metallopeptidase domain 3A (cyritestin 1)             | Adam3a   | 57021  | 1,06 | up   |
| 6615141 | 7146964 | 1243201 | ADAM metallopeptidase domain 3A (cyritestin 1)             | Adam3a   | 57021  | 1,08 | down |
| 6659604 | 7146964 | 1243207 | ADAM metallopeptidase domain 3A (cyritestin 1)             | Adam3a   | 57021  | 1,02 | up   |
| 6716575 | 7146964 | 1243205 | ADAM metallopeptidase domain 3A (cyritestin 1)             | Adam3a   | 57021  | 1,02 | down |
| 5736941 | 7170845 | 1301871 | ADAM metallopeptidase with thrombospondin type 1 motif, 19 | Adamts19 | 361332 | 1,01 | up   |
| 5752884 | 7170845 | 1301874 | ADAM metallopeptidase with thrombospondin type 1 motif, 19 | Adamts19 | 361332 | 1,18 | down |
| 5811465 | 7170845 | 1301890 | ADAM metallopeptidase with thrombospondin type 1 motif, 19 | Adamts19 | 361332 | 1,07 | up   |
| 5826985 | 7170845 | 1301887 | ADAM metallopeptidase with thrombospondin type 1 motif, 19 | Adamts19 | 361332 | 1,13 | down |
| 5852467 | 7170845 | 1301909 | ADAM metallopeptidase with thrombospondin type 1 motif, 19 | Adamts19 | 361332 | 1,19 | down |
| 5928867 | 7170845 | 1301884 | ADAM metallopeptidase with thrombospondin type 1 motif, 19 | Adamts19 | 361332 | 1,11 | up   |
| 5937768 | 7170845 | 1301851 | ADAM metallopeptidase with thrombospondin type 1 motif, 19 | Adamts19 | 361332 | 1,07 | up   |

|         |         |         |                                                            |          |        |      |      |
|---------|---------|---------|------------------------------------------------------------|----------|--------|------|------|
| 5960244 | 7170845 | 1301851 | ADAM metallopeptidase with thrombospondin type 1 motif, 19 | Adamts19 | 361332 | 2,14 | down |
| 6000458 | 7170845 | 1301858 | ADAM metallopeptidase with thrombospondin type 1 motif, 19 | Adamts19 | 361332 | 1,05 | up   |
| 6064018 | 7170845 | 1301902 | ADAM metallopeptidase with thrombospondin type 1 motif, 19 | Adamts19 | 361332 | 1,00 | down |
| 6066535 | 7170845 | 1301900 | ADAM metallopeptidase with thrombospondin type 1 motif, 19 | Adamts19 | 361332 | 1,16 | up   |
| 6108954 | 7170845 | 1301852 | ADAM metallopeptidase with thrombospondin type 1 motif, 19 | Adamts19 | 361332 | 1,06 | down |
| 6112386 | 7170845 | 1301852 | ADAM metallopeptidase with thrombospondin type 1 motif, 19 | Adamts19 | 361332 | 1,10 | down |
| 6221855 | 7170845 | 1301910 | ADAM metallopeptidase with thrombospondin type 1 motif, 19 | Adamts19 | 361332 | 1,03 | up   |
| 6226015 | 7170845 | 1301862 | ADAM metallopeptidase with thrombospondin type 1 motif, 19 | Adamts19 | 361332 | 1,15 | down |
| 6334601 | 7170845 | 1301893 | ADAM metallopeptidase with thrombospondin type 1 motif, 19 | Adamts19 | 361332 | 1,14 | up   |
| 6369979 | 7170845 | 1301867 | ADAM metallopeptidase with thrombospondin type 1 motif, 19 | Adamts19 | 361332 | 1,05 | down |
| 6370456 | 7170845 | 1301909 | ADAM metallopeptidase with thrombospondin type 1 motif, 19 | Adamts19 | 361332 | 1,04 | up   |
| 6422011 | 7170845 | 1301863 | ADAM metallopeptidase with thrombospondin type 1 motif, 19 | Adamts19 | 361332 | 1,21 | down |
| 6431355 | 7170845 | 1301880 | ADAM metallopeptidase with thrombospondin type 1 motif, 19 | Adamts19 | 361332 | 1,13 | down |
| 6499757 | 7170845 | 1301852 | ADAM metallopeptidase with thrombospondin type 1 motif, 19 | Adamts19 | 361332 | 1,43 | down |
| 6506654 | 7170845 | 1301852 | ADAM metallopeptidase with thrombospondin type 1 motif, 19 | Adamts19 | 361332 | 1,23 | down |
| 6553930 | 7170845 | 1301889 | ADAM metallopeptidase with thrombospondin type 1 motif, 19 | Adamts19 | 361332 | 1,04 | down |
| 6563008 | 7170845 | 1301860 | ADAM metallopeptidase with thrombospondin type 1 motif, 19 | Adamts19 | 361332 | 1,28 | up   |
| 6567457 | 7170845 | 1301876 | ADAM metallopeptidase with thrombospondin type 1 motif, 19 | Adamts19 | 361332 | 1,05 | up   |
| 6606149 | 7170845 | 1301865 | ADAM metallopeptidase with thrombospondin type 1 motif, 19 | Adamts19 | 361332 | 1,39 | down |
| 6618109 | 7170845 | 1301882 | ADAM metallopeptidase with thrombospondin type 1 motif, 19 | Adamts19 | 361332 | 1,10 | down |
| 6631347 | 7170845 | 1301904 | ADAM metallopeptidase with thrombospondin type 1 motif, 19 | Adamts19 | 361332 | 1,50 | up   |
| 6685081 | 7170845 | 1301852 | ADAM metallopeptidase with thrombospondin type 1 motif, 19 | Adamts19 | 361332 | 1,20 | down |
| 5619445 | 7189184 | 1347616 | ADAM metallopeptidase with thrombospondin type 1 motif, 6  | Adamts6  | 361886 | 1,22 | up   |
| 5622841 | 7189184 | 1347600 | ADAM metallopeptidase with thrombospondin type 1 motif, 6  | Adamts6  | 361886 | 1,14 | down |
| 5624631 | 7189184 | 1347573 | ADAM metallopeptidase with thrombospondin type 1 motif, 6  | Adamts6  | 361886 | 1,59 | down |
| 5632620 | 7189184 | 1347570 | ADAM metallopeptidase with thrombospondin type 1 motif, 6  | Adamts6  | 361886 | 1,09 | down |
| 5660563 | 7189184 | 1347572 | ADAM metallopeptidase with thrombospondin type 1 motif, 6  | Adamts6  | 361886 | 2,02 | up   |
| 5675496 | 7189184 | 1347583 | ADAM metallopeptidase with thrombospondin type 1 motif, 6  | Adamts6  | 361886 | 1,25 | down |
| 5715081 | 7189184 | 1347572 | ADAM metallopeptidase with thrombospondin type 1 motif, 6  | Adamts6  | 361886 | 1,15 | up   |
| 5725781 | 7189184 | 1347578 | ADAM metallopeptidase with thrombospondin type 1 motif, 6  | Adamts6  | 361886 | 1,36 | up   |
| 5727536 | 7189184 | 1347595 | ADAM metallopeptidase with thrombospondin type 1 motif, 6  | Adamts6  | 361886 | 1,69 | up   |
| 5840588 | 7189184 | 1347601 | ADAM metallopeptidase with thrombospondin type 1 motif, 6  | Adamts6  | 361886 | 1,10 | up   |
| 5855702 | 7189184 | 1347579 | ADAM metallopeptidase with thrombospondin type 1 motif, 6  | Adamts6  | 361886 | 1,31 | up   |
| 5864955 | 7189184 | 1347594 | ADAM metallopeptidase with thrombospondin type 1 motif, 6  | Adamts6  | 361886 | 1,37 | down |
| 5867399 | 7189184 | 1347616 | ADAM metallopeptidase with thrombospondin type 1 motif, 6  | Adamts6  | 361886 | 1,72 | up   |
| 5911988 | 7189184 | 1347616 | ADAM metallopeptidase with thrombospondin type 1 motif, 6  | Adamts6  | 361886 | 1,17 | down |
| 6007909 | 7189184 | 1347601 | ADAM metallopeptidase with thrombospondin type 1 motif, 6  | Adamts6  | 361886 | 1,08 | up   |
| 6026304 | 7189184 | 1347617 | ADAM metallopeptidase with thrombospondin type 1 motif, 6  | Adamts6  | 361886 | 1,50 | down |
| 6030370 | 7189184 | 1347581 | ADAM metallopeptidase with thrombospondin type 1 motif, 6  | Adamts6  | 361886 | 1,17 | down |
| 6046553 | 7189184 | 1347592 | ADAM metallopeptidase with thrombospondin type 1 motif, 6  | Adamts6  | 361886 | 1,14 | down |
| 6077020 | 7189184 | 1347586 | ADAM metallopeptidase with thrombospondin type 1 motif, 6  | Adamts6  | 361886 | 1,23 | up   |
| 6117210 | 7189184 | 1347588 | ADAM metallopeptidase with thrombospondin type 1 motif, 6  | Adamts6  | 361886 | 1,43 | down |
| 6129623 | 7189184 | 1347617 | ADAM metallopeptidase with thrombospondin type 1 motif, 6  | Adamts6  | 361886 | 1,59 | down |
| 6155553 | 7189184 | 1347601 | ADAM metallopeptidase with thrombospondin type 1 motif, 6  | Adamts6  | 361886 | 1,16 | down |
| 6162342 | 7189184 | 1347612 | ADAM metallopeptidase with thrombospondin type 1 motif, 6  | Adamts6  | 361886 | 1,04 | down |
| 6178464 | 7189184 | 1347601 | ADAM metallopeptidase with thrombospondin type 1 motif, 6  | Adamts6  | 361886 | 2,33 | up   |
| 6255030 | 7189184 | 1347573 | ADAM metallopeptidase with thrombospondin type 1 motif, 6  | Adamts6  | 361886 | 1,33 | up   |
| 6276211 | 7189184 | 1347590 | ADAM metallopeptidase with thrombospondin type 1 motif, 6  | Adamts6  | 361886 | 1,81 | up   |
| 6298168 | 7189184 | 1347609 | ADAM metallopeptidase with thrombospondin type 1 motif, 6  | Adamts6  | 361886 | 1,56 | up   |
| 6409605 | 7189184 | 1347616 | ADAM metallopeptidase with thrombospondin type 1 motif, 6  | Adamts6  | 361886 | 1,08 | down |
| 6418051 | 7189184 | 1347598 | ADAM metallopeptidase with thrombospondin type 1 motif, 6  | Adamts6  | 361886 | 1,01 | down |
| 6427885 | 7189184 | 1347597 | ADAM metallopeptidase with thrombospondin type 1 motif, 6  | Adamts6  | 361886 | 1,22 | down |
| 6454457 | 7189184 | 1347587 | ADAM metallopeptidase with thrombospondin type 1 motif, 6  | Adamts6  | 361886 | 1,63 | up   |
| 6481982 | 7189184 | 1347611 | ADAM metallopeptidase with thrombospondin type 1 motif, 6  | Adamts6  | 361886 | 1,06 | down |
| 6524293 | 7189184 | 1347588 | ADAM metallopeptidase with thrombospondin type 1 motif, 6  | Adamts6  | 361886 | 1,13 | up   |
| 6530646 | 7189184 | 1347591 | ADAM metallopeptidase with thrombospondin type 1 motif, 6  | Adamts6  | 361886 | 1,26 | up   |

|         |         |         |                                                           |         |        |      |      |
|---------|---------|---------|-----------------------------------------------------------|---------|--------|------|------|
| 6622888 | 7189184 | 1347574 | ADAM metallopeptidase with thrombospondin type 1 motif, 6 | Adamts6 | 361886 | 1,32 | down |
| 6653855 | 7189184 | 1347575 | ADAM metallopeptidase with thrombospondin type 1 motif, 6 | Adamts6 | 361886 | 2,72 | down |
| 6707443 | 7189184 | 1347599 | ADAM metallopeptidase with thrombospondin type 1 motif, 6 | Adamts6 | 361886 | 1,30 | down |
| 5739710 | 7334331 | 1705695 | ADAM metallopeptidase with thrombospondin type 1 motif, 8 | Adamts8 | 300475 | 1,39 | up   |
| 6122807 | 7334331 | 1705695 | ADAM metallopeptidase with thrombospondin type 1 motif, 8 | Adamts8 | 300475 | 1,02 | up   |
| 6152516 | 7334331 | 1705693 | ADAM metallopeptidase with thrombospondin type 1 motif, 8 | Adamts8 | 300475 | 1,13 | up   |
| 6210995 | 7334331 | 1705696 | ADAM metallopeptidase with thrombospondin type 1 motif, 8 | Adamts8 | 300475 | 1,09 | up   |
| 6223694 | 7334331 | 1705693 | ADAM metallopeptidase with thrombospondin type 1 motif, 8 | Adamts8 | 300475 | 1,14 | up   |
| 6367828 | 7334331 | 1705692 | ADAM metallopeptidase with thrombospondin type 1 motif, 8 | Adamts8 | 300475 | 1,05 | up   |
| 6381328 | 7334331 | 1705692 | ADAM metallopeptidase with thrombospondin type 1 motif, 8 | Adamts8 | 300475 | 1,07 | up   |
| 6396921 | 7334331 | 1705697 | ADAM metallopeptidase with thrombospondin type 1 motif, 8 | Adamts8 | 300475 | 1,48 | down |
| 6428344 | 7334331 | 1705695 | ADAM metallopeptidase with thrombospondin type 1 motif, 8 | Adamts8 | 300475 | 1,04 | down |
| 6443559 | 7334331 | 1705692 | ADAM metallopeptidase with thrombospondin type 1 motif, 8 | Adamts8 | 300475 | 1,28 | up   |
| 6503932 | 7334331 | 1705697 | ADAM metallopeptidase with thrombospondin type 1 motif, 8 | Adamts8 | 300475 | 1,42 | down |
| 6522574 | 7334331 | 1705689 | ADAM metallopeptidase with thrombospondin type 1 motif, 8 | Adamts8 | 300475 | 1,12 | up   |
| 6674885 | 7334331 | 1705697 | ADAM metallopeptidase with thrombospondin type 1 motif, 8 | Adamts8 | 300475 | 1,04 | up   |
| 5631440 | 7117187 | 1170121 | ADAM metallopeptidase with thrombospondin type 1, motif 3 | Adamts3 | 305253 | 1,12 | up   |
| 5646089 | 7117187 | 1170156 | ADAM metallopeptidase with thrombospondin type 1, motif 3 | Adamts3 | 305253 | 1,03 | up   |
| 5647148 | 7117187 | 1170133 | ADAM metallopeptidase with thrombospondin type 1, motif 3 | Adamts3 | 305253 | 1,03 | down |
| 5744385 | 7117187 | 1170101 | ADAM metallopeptidase with thrombospondin type 1, motif 3 | Adamts3 | 305253 | 2,24 | up   |
| 5777850 | 7117187 | 1170134 | ADAM metallopeptidase with thrombospondin type 1, motif 3 | Adamts3 | 305253 | 1,25 | up   |
| 5819989 | 7117187 | 1170156 | ADAM metallopeptidase with thrombospondin type 1, motif 3 | Adamts3 | 305253 | 1,19 | up   |
| 5826482 | 7117187 | 1170156 | ADAM metallopeptidase with thrombospondin type 1, motif 3 | Adamts3 | 305253 | 1,14 | down |
| 5864065 | 7117187 | 1170146 | ADAM metallopeptidase with thrombospondin type 1, motif 3 | Adamts3 | 305253 | 1,02 | up   |
| 5886471 | 7117187 | 1170135 | ADAM metallopeptidase with thrombospondin type 1, motif 3 | Adamts3 | 305253 | 1,32 | down |
| 5915280 | 7117187 | 1170149 | ADAM metallopeptidase with thrombospondin type 1, motif 3 | Adamts3 | 305253 | 1,17 | down |
| 5918725 | 7117187 | 1170147 | ADAM metallopeptidase with thrombospondin type 1, motif 3 | Adamts3 | 305253 | 1,03 | up   |
| 5956792 | 7117187 | 1170136 | ADAM metallopeptidase with thrombospondin type 1, motif 3 | Adamts3 | 305253 | 1,49 | up   |
| 5974362 | 7117187 | 1170137 | ADAM metallopeptidase with thrombospondin type 1, motif 3 | Adamts3 | 305253 | 1,13 | down |
| 5989489 | 7117187 | 1170104 | ADAM metallopeptidase with thrombospondin type 1, motif 3 | Adamts3 | 305253 | 1,07 | down |
| 6018925 | 7117187 | 1170143 | ADAM metallopeptidase with thrombospondin type 1, motif 3 | Adamts3 | 305253 | 1,27 | down |
| 6023370 | 7117187 | 1170149 | ADAM metallopeptidase with thrombospondin type 1, motif 3 | Adamts3 | 305253 | 1,07 | down |
| 6033756 | 7117187 | 1170156 | ADAM metallopeptidase with thrombospondin type 1, motif 3 | Adamts3 | 305253 | 1,19 | up   |
| 6049550 | 7117187 | 1170131 | ADAM metallopeptidase with thrombospondin type 1, motif 3 | Adamts3 | 305253 | 1,17 | down |
| 6064349 | 7117187 | 1170148 | ADAM metallopeptidase with thrombospondin type 1, motif 3 | Adamts3 | 305253 | 1,51 | up   |
| 6066101 | 7117187 | 1170136 | ADAM metallopeptidase with thrombospondin type 1, motif 3 | Adamts3 | 305253 | 1,21 | down |
| 6096967 | 7117187 | 1170101 | ADAM metallopeptidase with thrombospondin type 1, motif 3 | Adamts3 | 305253 | 1,01 | up   |
| 6124494 | 7117187 | 1170140 | ADAM metallopeptidase with thrombospondin type 1, motif 3 | Adamts3 | 305253 | 1,01 | up   |
| 6141972 | 7117187 | 1170152 | ADAM metallopeptidase with thrombospondin type 1, motif 3 | Adamts3 | 305253 | 1,18 | up   |
| 6165743 | 7117187 | 1170101 | ADAM metallopeptidase with thrombospondin type 1, motif 3 | Adamts3 | 305253 | 1,24 | down |
| 6415708 | 7117187 | 1170142 | ADAM metallopeptidase with thrombospondin type 1, motif 3 | Adamts3 | 305253 | 1,05 | down |
| 6431263 | 7117187 | 1170108 | ADAM metallopeptidase with thrombospondin type 1, motif 3 | Adamts3 | 305253 | 1,00 | up   |
| 6530070 | 7117187 | 1170156 | ADAM metallopeptidase with thrombospondin type 1, motif 3 | Adamts3 | 305253 | 1,13 | down |
| 6588210 | 7117187 | 1170101 | ADAM metallopeptidase with thrombospondin type 1, motif 3 | Adamts3 | 305253 | 1,06 | down |
| 6665102 | 7117187 | 1170139 | ADAM metallopeptidase with thrombospondin type 1, motif 3 | Adamts3 | 305253 | 1,16 | down |
| 6730019 | 7117187 | 1170138 | ADAM metallopeptidase with thrombospondin type 1, motif 3 | Adamts3 | 305253 | 1,08 | down |
| 5638184 | 7180943 | 1327459 | adaptor-related protein complex 1, gamma 1 subunit        | Ap1g1   | 171494 | 1,45 | down |
| 5687229 | 7180943 | 1327466 | adaptor-related protein complex 1, gamma 1 subunit        | Ap1g1   | 171494 | 1,10 | down |
| 5760842 | 7180943 | 1327468 | adaptor-related protein complex 1, gamma 1 subunit        | Ap1g1   | 171494 | 1,56 | down |
| 5770665 | 7180943 | 1327447 | adaptor-related protein complex 1, gamma 1 subunit        | Ap1g1   | 171494 | 1,09 | down |
| 5787755 | 7180943 | 1327451 | adaptor-related protein complex 1, gamma 1 subunit        | Ap1g1   | 171494 | 1,10 | up   |
| 5793027 | 7180943 | 1327469 | adaptor-related protein complex 1, gamma 1 subunit        | Ap1g1   | 171494 | 1,05 | up   |
| 5825106 | 7180943 | 1327457 | adaptor-related protein complex 1, gamma 1 subunit        | Ap1g1   | 171494 | 1,26 | down |
| 5836494 | 7180943 | 1327467 | adaptor-related protein complex 1, gamma 1 subunit        | Ap1g1   | 171494 | 1,08 | down |
| 5921747 | 7180943 | 1327453 | adaptor-related protein complex 1, gamma 1 subunit        | Ap1g1   | 171494 | 1,13 | up   |
| 5924718 | 7180943 | 1327452 | adaptor-related protein complex 1, gamma 1 subunit        | Ap1g1   | 171494 | 1,23 | up   |

|         |         |         |                                                    |       |        |      |      |
|---------|---------|---------|----------------------------------------------------|-------|--------|------|------|
| 5964931 | 7180943 | 1327469 | adaptor-related protein complex 1, gamma 1 subunit | Ap1g1 | 171494 | 2,84 | up   |
| 5974718 | 7180943 | 1327452 | adaptor-related protein complex 1, gamma 1 subunit | Ap1g1 | 171494 | 1,02 | up   |
| 6062326 | 7180943 | 1327454 | adaptor-related protein complex 1, gamma 1 subunit | Ap1g1 | 171494 | 1,36 | down |
| 6079323 | 7180943 | 1327450 | adaptor-related protein complex 1, gamma 1 subunit | Ap1g1 | 171494 | 1,29 | up   |
| 6089128 | 7180943 | 1327457 | adaptor-related protein complex 1, gamma 1 subunit | Ap1g1 | 171494 | 1,11 | down |
| 6133850 | 7180943 | 1327469 | adaptor-related protein complex 1, gamma 1 subunit | Ap1g1 | 171494 | 1,03 | down |
| 6156399 | 7180943 | 1327458 | adaptor-related protein complex 1, gamma 1 subunit | Ap1g1 | 171494 | 1,06 | down |
| 6172384 | 7180943 | 1327469 | adaptor-related protein complex 1, gamma 1 subunit | Ap1g1 | 171494 | 1,04 | up   |
| 6265378 | 7180943 | 1327464 | adaptor-related protein complex 1, gamma 1 subunit | Ap1g1 | 171494 | 1,02 | up   |
| 6291658 | 7180943 | 1327455 | adaptor-related protein complex 1, gamma 1 subunit | Ap1g1 | 171494 | 1,04 | up   |
| 6313737 | 7180943 | 1327462 | adaptor-related protein complex 1, gamma 1 subunit | Ap1g1 | 171494 | 1,02 | down |
| 6315828 | 7180943 | 1327463 | adaptor-related protein complex 1, gamma 1 subunit | Ap1g1 | 171494 | 1,08 | down |
| 6316899 | 7180943 | 1327461 | adaptor-related protein complex 1, gamma 1 subunit | Ap1g1 | 171494 | 1,20 | down |
| 6331058 | 7180943 | 1327466 | adaptor-related protein complex 1, gamma 1 subunit | Ap1g1 | 171494 | 1,23 | up   |
| 6342903 | 7180943 | 1327465 | adaptor-related protein complex 1, gamma 1 subunit | Ap1g1 | 171494 | 1,02 | up   |
| 6355748 | 7180943 | 1327449 | adaptor-related protein complex 1, gamma 1 subunit | Ap1g1 | 171494 | 1,08 | down |
| 6374013 | 7180943 | 1327460 | adaptor-related protein complex 1, gamma 1 subunit | Ap1g1 | 171494 | 1,35 | down |
| 6380079 | 7180943 | 1327456 | adaptor-related protein complex 1, gamma 1 subunit | Ap1g1 | 171494 | 1,01 | down |
| 6576647 | 7180943 | 1327469 | adaptor-related protein complex 1, gamma 1 subunit | Ap1g1 | 171494 | 1,01 | down |
| 6600911 | 7180943 | 1327450 | adaptor-related protein complex 1, gamma 1 subunit | Ap1g1 | 171494 | 1,03 | up   |
| 5623421 | 7197638 | 1369573 | adaptor-related protein complex 4, beta 1 subunit  | Ap4b1 | 310746 | 1,57 | up   |
| 5626147 | 7197638 | 1369566 | adaptor-related protein complex 4, beta 1 subunit  | Ap4b1 | 310746 | 2,45 | up   |
| 5713547 | 7197638 | 1369569 | adaptor-related protein complex 4, beta 1 subunit  | Ap4b1 | 310746 | 1,07 | down |
| 5764210 | 7197638 | 1369572 | adaptor-related protein complex 4, beta 1 subunit  | Ap4b1 | 310746 | 1,03 | up   |
| 5894002 | 7197638 | 1369563 | adaptor-related protein complex 4, beta 1 subunit  | Ap4b1 | 310746 | 1,63 | down |
| 6073954 | 7197638 | 1369574 | adaptor-related protein complex 4, beta 1 subunit  | Ap4b1 | 310746 | 1,09 | down |
| 6114839 | 7197638 | 1369572 | adaptor-related protein complex 4, beta 1 subunit  | Ap4b1 | 310746 | 1,28 | down |
| 6211462 | 7197638 | 1369564 | adaptor-related protein complex 4, beta 1 subunit  | Ap4b1 | 310746 | 1,07 | down |
| 6254068 | 7197638 | 1369568 | adaptor-related protein complex 4, beta 1 subunit  | Ap4b1 | 310746 | 1,03 | up   |
| 6364364 | 7197638 | 1369563 | adaptor-related protein complex 4, beta 1 subunit  | Ap4b1 | 310746 | 1,14 | down |
| 6374921 | 7197638 | 1369573 | adaptor-related protein complex 4, beta 1 subunit  | Ap4b1 | 310746 | 1,11 | up   |
| 6414032 | 7197638 | 1369570 | adaptor-related protein complex 4, beta 1 subunit  | Ap4b1 | 310746 | 1,17 | down |
| 6616528 | 7197638 | 1369568 | adaptor-related protein complex 4, beta 1 subunit  | Ap4b1 | 310746 | 1,21 | up   |
| 6651249 | 7197638 | 1369563 | adaptor-related protein complex 4, beta 1 subunit  | Ap4b1 | 310746 | 1,07 | up   |
| 6659585 | 7197638 | 1369567 | adaptor-related protein complex 4, beta 1 subunit  | Ap4b1 | 310746 | 1,02 | down |
| 6706977 | 7197638 | 1369573 | adaptor-related protein complex 4, beta 1 subunit  | Ap4b1 | 310746 | 1,23 | down |
| 5740863 | 7298008 | 1616674 | adaptor-related protein complex AP-4, sigma 1      | Ap4s1 | 366618 | 1,00 | down |
| 5819665 | 7298008 | 1616679 | adaptor-related protein complex AP-4, sigma 1      | Ap4s1 | 366618 | 1,07 | down |
| 5834144 | 7298008 | 1616675 | adaptor-related protein complex AP-4, sigma 1      | Ap4s1 | 366618 | 1,02 | up   |
| 6099994 | 7298008 | 1616676 | adaptor-related protein complex AP-4, sigma 1      | Ap4s1 | 366618 | 1,05 | down |
| 6336138 | 7298008 | 1616674 | adaptor-related protein complex AP-4, sigma 1      | Ap4s1 | 366618 | 1,01 | down |
| 6350093 | 7298008 | 1616679 | adaptor-related protein complex AP-4, sigma 1      | Ap4s1 | 366618 | 1,71 | down |
| 6404445 | 7298008 | 1616674 | adaptor-related protein complex AP-4, sigma 1      | Ap4s1 | 366618 | 1,19 | down |
| 5715925 | 7255695 | 1511810 | adducin 2 (beta)                                   | Add2  | 24171  | 1,02 | down |
| 5812178 | 7255695 | 1511818 | adducin 2 (beta)                                   | Add2  | 24171  | 1,10 | up   |
| 5913194 | 7255695 | 1511815 | adducin 2 (beta)                                   | Add2  | 24171  | 1,14 | up   |
| 5963895 | 7255695 | 1511806 | adducin 2 (beta)                                   | Add2  | 24171  | 1,35 | up   |
| 5983879 | 7255695 | 1511809 | adducin 2 (beta)                                   | Add2  | 24171  | 2,13 | up   |
| 5985831 | 7255695 | 1511808 | adducin 2 (beta)                                   | Add2  | 24171  | 1,37 | down |
| 6089091 | 7255695 | 1511812 | adducin 2 (beta)                                   | Add2  | 24171  | 1,76 | up   |
| 6158209 | 7255695 | 1511818 | adducin 2 (beta)                                   | Add2  | 24171  | 1,17 | down |
| 6252295 | 7255695 | 1511817 | adducin 2 (beta)                                   | Add2  | 24171  | 1,14 | up   |
| 6355644 | 7255695 | 1511814 | adducin 2 (beta)                                   | Add2  | 24171  | 1,15 | down |
| 6434509 | 7255695 | 1511808 | adducin 2 (beta)                                   | Add2  | 24171  | 1,64 | down |
| 6498801 | 7255695 | 1511807 | adducin 2 (beta)                                   | Add2  | 24171  | 1,21 | down |
| 6515463 | 7255695 | 1511816 | adducin 2 (beta)                                   | Add2  | 24171  | 1,37 | down |

|         |         |         |                                      |       |        |      |      |
|---------|---------|---------|--------------------------------------|-------|--------|------|------|
| 6565362 | 7255695 | 1511808 | adducin 2 (beta)                     | Add2  | 24171  | 1,04 | up   |
| 6566080 | 7255695 | 1511818 | adducin 2 (beta)                     | Add2  | 24171  | 1,36 | down |
| 6629255 | 7255695 | 1511813 | adducin 2 (beta)                     | Add2  | 24171  | 1,19 | down |
| 6643684 | 7255695 | 1511811 | adducin 2 (beta)                     | Add2  | 24171  | 1,16 | down |
| 5701559 | 7063839 | 1040576 | adducin 3 (gamma)                    | Add3  | 25230  | 1,01 | down |
| 5752517 | 7063839 | 1040578 | adducin 3 (gamma)                    | Add3  | 25230  | 1,44 | down |
| 5756861 | 7063839 | 1040573 | adducin 3 (gamma)                    | Add3  | 25230  | 1,13 | down |
| 5765015 | 7063839 | 1040571 | adducin 3 (gamma)                    | Add3  | 25230  | 1,11 | down |
| 5792564 | 7063839 | 1040572 | adducin 3 (gamma)                    | Add3  | 25230  | 1,26 | up   |
| 5811498 | 7063839 | 1040567 | adducin 3 (gamma)                    | Add3  | 25230  | 1,38 | up   |
| 5821009 | 7063839 | 1040577 | adducin 3 (gamma)                    | Add3  | 25230  | 1,03 | down |
| 5851608 | 7063839 | 1040570 | adducin 3 (gamma)                    | Add3  | 25230  | 1,01 | down |
| 5874487 | 7063839 | 1040569 | adducin 3 (gamma)                    | Add3  | 25230  | 1,02 | down |
| 5983976 | 7063839 | 1040566 | adducin 3 (gamma)                    | Add3  | 25230  | 1,21 | down |
| 6281075 | 7063839 | 1040573 | adducin 3 (gamma)                    | Add3  | 25230  | 1,25 | up   |
| 6294318 | 7063839 | 1040574 | adducin 3 (gamma)                    | Add3  | 25230  | 1,35 | down |
| 6436818 | 7063839 | 1040566 | adducin 3 (gamma)                    | Add3  | 25230  | 1,35 | up   |
| 6640790 | 7063839 | 1040568 | adducin 3 (gamma)                    | Add3  | 25230  | 1,10 | up   |
| 6671585 | 7063839 | 1040575 | adducin 3 (gamma)                    | Add3  | 25230  | 1,17 | up   |
| 5628466 | 7185622 | 1339215 | adenosine deaminase, tRNA-specific 1 | Adat1 | 690810 | 1,10 | up   |
| 5730241 | 7185622 | 1339216 | adenosine deaminase, tRNA-specific 1 | Adat1 | 690810 | 2,24 | down |
| 5770013 | 7185622 | 1339224 | adenosine deaminase, tRNA-specific 1 | Adat1 | 690810 | 1,06 | up   |
| 5927421 | 7185622 | 1339208 | adenosine deaminase, tRNA-specific 1 | Adat1 | 690810 | 1,06 | up   |
| 5962418 | 7185622 | 1339214 | adenosine deaminase, tRNA-specific 1 | Adat1 | 690810 | 1,13 | up   |
| 5989850 | 7185622 | 1339219 | adenosine deaminase, tRNA-specific 1 | Adat1 | 690810 | 1,80 | down |
| 5991227 | 7185622 | 1339222 | adenosine deaminase, tRNA-specific 1 | Adat1 | 690810 | 1,47 | down |
| 6004351 | 7185622 | 1339214 | adenosine deaminase, tRNA-specific 1 | Adat1 | 690810 | 1,26 | down |
| 6046345 | 7185622 | 1339209 | adenosine deaminase, tRNA-specific 1 | Adat1 | 690810 | 1,40 | down |
| 6160857 | 7185622 | 1339210 | adenosine deaminase, tRNA-specific 1 | Adat1 | 690810 | 1,01 | up   |
| 6234060 | 7185622 | 1339207 | adenosine deaminase, tRNA-specific 1 | Adat1 | 690810 | 1,05 | down |
| 6375556 | 7185622 | 1339221 | adenosine deaminase, tRNA-specific 1 | Adat1 | 690810 | 1,31 | down |
| 6420265 | 7185622 | 1339212 | adenosine deaminase, tRNA-specific 1 | Adat1 | 690810 | 1,08 | down |
| 6435643 | 7185622 | 1339220 | adenosine deaminase, tRNA-specific 1 | Adat1 | 690810 | 1,36 | up   |
| 6609775 | 7185622 | 1339211 | adenosine deaminase, tRNA-specific 1 | Adat1 | 690810 | 1,13 | down |
| 5630337 | 7035439 | 974528  | adenosine monophosphate deaminase 3  | Ampd3 | 25095  | 1,12 | down |
| 5640590 | 7035439 | 974517  | adenosine monophosphate deaminase 3  | Ampd3 | 25095  | 1,00 | up   |
| 5656838 | 7035439 | 974531  | adenosine monophosphate deaminase 3  | Ampd3 | 25095  | 1,03 | down |
| 5793062 | 7035439 | 974525  | adenosine monophosphate deaminase 3  | Ampd3 | 25095  | 1,44 | up   |
| 5890536 | 7035439 | 974527  | adenosine monophosphate deaminase 3  | Ampd3 | 25095  | 1,35 | down |
| 5940864 | 7035439 | 974520  | adenosine monophosphate deaminase 3  | Ampd3 | 25095  | 1,13 | down |
| 5984708 | 7035439 | 974530  | adenosine monophosphate deaminase 3  | Ampd3 | 25095  | 1,85 | down |
| 5989487 | 7035439 | 974528  | adenosine monophosphate deaminase 3  | Ampd3 | 25095  | 1,61 | up   |
| 5998261 | 7035439 | 974518  | adenosine monophosphate deaminase 3  | Ampd3 | 25095  | 1,35 | down |
| 6062165 | 7035439 | 974526  | adenosine monophosphate deaminase 3  | Ampd3 | 25095  | 1,13 | up   |
| 6117587 | 7035439 | 974518  | adenosine monophosphate deaminase 3  | Ampd3 | 25095  | 1,51 | up   |
| 6134958 | 7035439 | 974519  | adenosine monophosphate deaminase 3  | Ampd3 | 25095  | 1,35 | up   |
| 6142147 | 7035439 | 974517  | adenosine monophosphate deaminase 3  | Ampd3 | 25095  | 1,99 | down |
| 6159958 | 7035439 | 974522  | adenosine monophosphate deaminase 3  | Ampd3 | 25095  | 2,08 | down |
| 6177078 | 7035439 | 974523  | adenosine monophosphate deaminase 3  | Ampd3 | 25095  | 1,18 | down |
| 6323337 | 7035439 | 974524  | adenosine monophosphate deaminase 3  | Ampd3 | 25095  | 1,60 | up   |
| 6390974 | 7035439 | 974529  | adenosine monophosphate deaminase 3  | Ampd3 | 25095  | 1,03 | down |
| 6429091 | 7035439 | 974521  | adenosine monophosphate deaminase 3  | Ampd3 | 25095  | 1,25 | up   |
| 5676370 | 7120827 | 1179311 | adenylate cyclase 1 (brain)          | Adcy1 | 305509 | 1,44 | up   |
| 5732850 | 7120827 | 1179343 | adenylate cyclase 1 (brain)          | Adcy1 | 305509 | 1,63 | down |
| 5740295 | 7120827 | 1179311 | adenylate cyclase 1 (brain)          | Adcy1 | 305509 | 1,08 | up   |
| 5837466 | 7120827 | 1179306 | adenylate cyclase 1 (brain)          | Adcy1 | 305509 | 1,02 | down |

|         |         |         |                             |       |        |      |      |
|---------|---------|---------|-----------------------------|-------|--------|------|------|
| 5864537 | 7120827 | 1179301 | adenylate cyclase 1 (brain) | Adcy1 | 305509 | 1,08 | down |
| 5903240 | 7120827 | 1179349 | adenylate cyclase 1 (brain) | Adcy1 | 305509 | 1,53 | down |
| 5926080 | 7120827 | 1179332 | adenylate cyclase 1 (brain) | Adcy1 | 305509 | 1,02 | down |
| 5971454 | 7120827 | 1179329 | adenylate cyclase 1 (brain) | Adcy1 | 305509 | 1,28 | down |
| 5992479 | 7120827 | 1179349 | adenylate cyclase 1 (brain) | Adcy1 | 305509 | 1,24 | up   |
| 6050307 | 7120827 | 1179333 | adenylate cyclase 1 (brain) | Adcy1 | 305509 | 3,40 | down |
| 6051396 | 7120827 | 1179317 | adenylate cyclase 1 (brain) | Adcy1 | 305509 | 1,34 | up   |
| 6070511 | 7120827 | 1179333 | adenylate cyclase 1 (brain) | Adcy1 | 305509 | 1,64 | down |
| 6087249 | 7120827 | 1179324 | adenylate cyclase 1 (brain) | Adcy1 | 305509 | 1,22 | up   |
| 6114134 | 7120827 | 1179325 | adenylate cyclase 1 (brain) | Adcy1 | 305509 | 1,88 | up   |
| 6178534 | 7120827 | 1179333 | adenylate cyclase 1 (brain) | Adcy1 | 305509 | 1,09 | down |
| 6192535 | 7120827 | 1179334 | adenylate cyclase 1 (brain) | Adcy1 | 305509 | 1,19 | up   |
| 6237884 | 7120827 | 1179347 | adenylate cyclase 1 (brain) | Adcy1 | 305509 | 1,81 | up   |
| 6326124 | 7120827 | 1179313 | adenylate cyclase 1 (brain) | Adcy1 | 305509 | 1,10 | down |
| 6380030 | 7120827 | 1179349 | adenylate cyclase 1 (brain) | Adcy1 | 305509 | 1,24 | up   |
| 6455171 | 7120827 | 1179328 | adenylate cyclase 1 (brain) | Adcy1 | 305509 | 1,08 | down |
| 6465347 | 7120827 | 1179333 | adenylate cyclase 1 (brain) | Adcy1 | 305509 | 1,27 | up   |
| 6510984 | 7120827 | 1179341 | adenylate cyclase 1 (brain) | Adcy1 | 305509 | 1,08 | up   |
| 6565636 | 7120827 | 1179344 | adenylate cyclase 1 (brain) | Adcy1 | 305509 | 2,17 | down |
| 6664250 | 7120827 | 1179340 | adenylate cyclase 1 (brain) | Adcy1 | 305509 | 1,00 | down |
| 6687466 | 7120827 | 1179327 | adenylate cyclase 1 (brain) | Adcy1 | 305509 | 2,01 | up   |
| 6726064 | 7120827 | 1179323 | adenylate cyclase 1 (brain) | Adcy1 | 305509 | 1,33 | up   |
| 5642316 | 7154556 | 1262010 | adenylate cyclase 2 (brain) | Adcy2 | 81636  | 1,42 | down |
| 5652427 | 7154556 | 1262011 | adenylate cyclase 2 (brain) | Adcy2 | 81636  | 1,49 | up   |
| 5730406 | 7154556 | 1262000 | adenylate cyclase 2 (brain) | Adcy2 | 81636  | 1,21 | up   |
| 5748905 | 7154556 | 1262009 | adenylate cyclase 2 (brain) | Adcy2 | 81636  | 1,40 | up   |
| 5751215 | 7154556 | 1261999 | adenylate cyclase 2 (brain) | Adcy2 | 81636  | 1,52 | down |
| 5758657 | 7154556 | 1261994 | adenylate cyclase 2 (brain) | Adcy2 | 81636  | 1,03 | up   |
| 5782099 | 7154556 | 1262002 | adenylate cyclase 2 (brain) | Adcy2 | 81636  | 1,03 | down |
| 6078931 | 7154556 | 1262008 | adenylate cyclase 2 (brain) | Adcy2 | 81636  | 1,26 | up   |
| 6098786 | 7154556 | 1262005 | adenylate cyclase 2 (brain) | Adcy2 | 81636  | 1,65 | up   |
| 6109950 | 7154556 | 1262007 | adenylate cyclase 2 (brain) | Adcy2 | 81636  | 1,36 | down |
| 6168070 | 7154556 | 1261995 | adenylate cyclase 2 (brain) | Adcy2 | 81636  | 1,26 | up   |
| 6174483 | 7154556 | 1262014 | adenylate cyclase 2 (brain) | Adcy2 | 81636  | 1,01 | up   |
| 6174532 | 7154556 | 1262004 | adenylate cyclase 2 (brain) | Adcy2 | 81636  | 1,02 | down |
| 6184544 | 7154556 | 1262010 | adenylate cyclase 2 (brain) | Adcy2 | 81636  | 1,22 | down |
| 6264286 | 7154556 | 1262001 | adenylate cyclase 2 (brain) | Adcy2 | 81636  | 1,01 | down |
| 6296497 | 7154556 | 1262006 | adenylate cyclase 2 (brain) | Adcy2 | 81636  | 1,40 | down |
| 6346268 | 7154556 | 1261997 | adenylate cyclase 2 (brain) | Adcy2 | 81636  | 1,53 | down |
| 6354297 | 7154556 | 1262013 | adenylate cyclase 2 (brain) | Adcy2 | 81636  | 2,24 | down |
| 6357465 | 7154556 | 1261998 | adenylate cyclase 2 (brain) | Adcy2 | 81636  | 1,25 | down |
| 6376548 | 7154556 | 1262012 | adenylate cyclase 2 (brain) | Adcy2 | 81636  | 1,07 | down |
| 6399593 | 7154556 | 1262017 | adenylate cyclase 2 (brain) | Adcy2 | 81636  | 1,16 | up   |
| 6407302 | 7154556 | 1261996 | adenylate cyclase 2 (brain) | Adcy2 | 81636  | 1,03 | up   |
| 6441912 | 7154556 | 1261997 | adenylate cyclase 2 (brain) | Adcy2 | 81636  | 1,01 | up   |
| 6465911 | 7154556 | 1261993 | adenylate cyclase 2 (brain) | Adcy2 | 81636  | 1,00 | up   |
| 6494566 | 7154556 | 1262014 | adenylate cyclase 2 (brain) | Adcy2 | 81636  | 1,01 | up   |
| 6511399 | 7154556 | 1262016 | adenylate cyclase 2 (brain) | Adcy2 | 81636  | 1,08 | up   |
| 6519041 | 7154556 | 1262003 | adenylate cyclase 2 (brain) | Adcy2 | 81636  | 1,32 | down |
| 6639579 | 7154556 | 1262015 | adenylate cyclase 2 (brain) | Adcy2 | 81636  | 1,53 | up   |
| 5714837 | 7277738 | 1567147 | adenylate kinase 3-like 1   | Ak311 | 29223  | 1,07 | down |
| 5774829 | 7277738 | 1567144 | adenylate kinase 3-like 1   | Ak311 | 29223  | 1,02 | up   |
| 5952112 | 7277738 | 1567149 | adenylate kinase 3-like 1   | Ak311 | 29223  | 1,95 | down |
| 6214954 | 7277738 | 1567148 | adenylate kinase 3-like 1   | Ak311 | 29223  | 1,29 | up   |
| 6439364 | 7277738 | 1567143 | adenylate kinase 3-like 1   | Ak311 | 29223  | 2,88 | down |
| 6586292 | 7277738 | 1567147 | adenylate kinase 3-like 1   | Ak311 | 29223  | 1,67 | down |



|         |         |         |                                      |        |        |      |      |
|---------|---------|---------|--------------------------------------|--------|--------|------|------|
| 6629164 | 7277738 | 1567145 | adenylate kinase 3-like 1            | Ak311  | 29223  | 1,42 | up   |
| 6746468 | 7277738 | 1567146 | adenylate kinase 3-like 1            | Ak311  | 29223  | 1,32 | up   |
| 5732398 | 7335147 | 1707477 | adipocyte-specific adhesion molecule | Asam   | 286939 | 1,08 | down |
| 5837598 | 7335147 | 1707482 | adipocyte-specific adhesion molecule | Asam   | 286939 | 1,07 | up   |
| 5877174 | 7335147 | 1707480 | adipocyte-specific adhesion molecule | Asam   | 286939 | 1,24 | up   |
| 5908508 | 7335147 | 1707475 | adipocyte-specific adhesion molecule | Asam   | 286939 | 1,05 | up   |
| 6009477 | 7335147 | 1707479 | adipocyte-specific adhesion molecule | Asam   | 286939 | 1,09 | up   |
| 6085884 | 7335147 | 1707481 | adipocyte-specific adhesion molecule | Asam   | 286939 | 1,07 | up   |
| 6147891 | 7335147 | 1707478 | adipocyte-specific adhesion molecule | Asam   | 286939 | 1,11 | down |
| 6163774 | 7335147 | 1707482 | adipocyte-specific adhesion molecule | Asam   | 286939 | 1,23 | down |
| 6299142 | 7335147 | 1707481 | adipocyte-specific adhesion molecule | Asam   | 286939 | 1,10 | down |
| 6366836 | 7335147 | 1707475 | adipocyte-specific adhesion molecule | Asam   | 286939 | 1,73 | up   |
| 6424760 | 7335147 | 1707482 | adipocyte-specific adhesion molecule | Asam   | 286939 | 1,20 | down |
| 6537809 | 7335147 | 1707482 | adipocyte-specific adhesion molecule | Asam   | 286939 | 1,43 | down |
| 6646047 | 7335147 | 1707476 | adipocyte-specific adhesion molecule | Asam   | 286939 | 1,33 | down |
| 6707539 | 7335147 | 1707482 | adipocyte-specific adhesion molecule | Asam   | 286939 | 1,02 | up   |
| 6719734 | 7335147 | 1707475 | adipocyte-specific adhesion molecule | Asam   | 286939 | 2,55 | down |
| 5767839 | 7369781 | 1795028 | ADP-ribosylation factor-like 13B     | Arl13b | 304037 | 1,24 | up   |
| 5879365 | 7369781 | 1795030 | ADP-ribosylation factor-like 13B     | Arl13b | 304037 | 1,72 | down |
| 5972866 | 7369781 | 1795031 | ADP-ribosylation factor-like 13B     | Arl13b | 304037 | 1,10 | down |
| 6088616 | 7369781 | 1795038 | ADP-ribosylation factor-like 13B     | Arl13b | 304037 | 1,08 | down |
| 6150860 | 7369781 | 1795038 | ADP-ribosylation factor-like 13B     | Arl13b | 304037 | 1,05 | down |
| 6223895 | 7369781 | 1795025 | ADP-ribosylation factor-like 13B     | Arl13b | 304037 | 1,01 | down |
| 6314542 | 7369781 | 1795027 | ADP-ribosylation factor-like 13B     | Arl13b | 304037 | 1,07 | up   |
| 6336936 | 7369781 | 1795032 | ADP-ribosylation factor-like 13B     | Arl13b | 304037 | 1,01 | up   |
| 6338455 | 7369781 | 1795029 | ADP-ribosylation factor-like 13B     | Arl13b | 304037 | 1,13 | down |
| 6568790 | 7369781 | 1795035 | ADP-ribosylation factor-like 13B     | Arl13b | 304037 | 2,19 | up   |
| 6590033 | 7369781 | 1795036 | ADP-ribosylation factor-like 13B     | Arl13b | 304037 | 1,29 | up   |
| 5863165 | 7305953 | 1637526 | ADP-ribosylation factor-like 4A      | Arl4a  | 29308  | 1,61 | up   |
| 5980970 | 7305953 | 1637525 | ADP-ribosylation factor-like 4A      | Arl4a  | 29308  | 1,32 | down |
| 6113273 | 7305953 | 1637528 | ADP-ribosylation factor-like 4A      | Arl4a  | 29308  | 2,05 | down |
| 6444582 | 7305953 | 1637527 | ADP-ribosylation factor-like 4A      | Arl4a  | 29308  | 1,26 | up   |
| 6507127 | 7305953 | 1637527 | ADP-ribosylation factor-like 4A      | Arl4a  | 29308  | 1,27 | up   |
| 6649396 | 7305953 | 1637527 | ADP-ribosylation factor-like 4A      | Arl4a  | 29308  | 1,10 | down |
| 5772837 | 7105375 | 1140962 | ADP-ribosylation factor-like 8A      | Arl8a  | 498234 | 3,99 | down |
| 5775851 | 7105375 | 1140968 | ADP-ribosylation factor-like 8A      | Arl8a  | 498234 | 1,05 | up   |
| 5802298 | 7105375 | 1140966 | ADP-ribosylation factor-like 8A      | Arl8a  | 498234 | 1,01 | down |
| 5879878 | 7105375 | 1140967 | ADP-ribosylation factor-like 8A      | Arl8a  | 498234 | 1,21 | up   |
| 6281000 | 7105375 | 1140965 | ADP-ribosylation factor-like 8A      | Arl8a  | 498234 | 1,23 | up   |
| 6507629 | 7105375 | 1140968 | ADP-ribosylation factor-like 8A      | Arl8a  | 498234 | 1,09 | up   |
| 6549266 | 7105375 | 1140964 | ADP-ribosylation factor-like 8A      | Arl8a  | 498234 | 1,06 | up   |
| 6574963 | 7105375 | 1140962 | ADP-ribosylation factor-like 8A      | Arl8a  | 498234 | 1,42 | up   |
| 6672387 | 7105375 | 1140963 | ADP-ribosylation factor-like 8A      | Arl8a  | 498234 | 1,27 | up   |
| 5633765 | 7120690 | 1179045 | AE binding protein 1                 | Aebp1  | 305494 | 1,05 | down |
| 5647156 | 7120690 | 1179050 | AE binding protein 1                 | Aebp1  | 305494 | 1,36 | up   |
| 5669763 | 7120690 | 1179048 | AE binding protein 1                 | Aebp1  | 305494 | 1,32 | up   |
| 5785189 | 7120690 | 1179052 | AE binding protein 1                 | Aebp1  | 305494 | 1,11 | down |
| 5930757 | 7120690 | 1179049 | AE binding protein 1                 | Aebp1  | 305494 | 1,01 | up   |
| 5932046 | 7120690 | 1179048 | AE binding protein 1                 | Aebp1  | 305494 | 1,09 | up   |
| 6009899 | 7120690 | 1179044 | AE binding protein 1                 | Aebp1  | 305494 | 1,22 | up   |
| 6090915 | 7120690 | 1179038 | AE binding protein 1                 | Aebp1  | 305494 | 1,07 | down |
| 6106956 | 7120690 | 1179055 | AE binding protein 1                 | Aebp1  | 305494 | 1,11 | down |
| 6150419 | 7120690 | 1179048 | AE binding protein 1                 | Aebp1  | 305494 | 1,06 | up   |
| 6151385 | 7120690 | 1179041 | AE binding protein 1                 | Aebp1  | 305494 | 1,37 | up   |
| 6204542 | 7120690 | 1179054 | AE binding protein 1                 | Aebp1  | 305494 | 1,09 | up   |
| 6261469 | 7120690 | 1179048 | AE binding protein 1                 | Aebp1  | 305494 | 1,06 | down |

|         |         |         |                           |       |        |      |      |
|---------|---------|---------|---------------------------|-------|--------|------|------|
| 6285792 | 7120690 | 1179039 | AE binding protein 1      | Aebp1 | 305494 | 1,31 | down |
| 6286338 | 7120690 | 1179045 | AE binding protein 1      | Aebp1 | 305494 | 2,21 | down |
| 6290274 | 7120690 | 1179051 | AE binding protein 1      | Aebp1 | 305494 | 1,80 | up   |
| 6357818 | 7120690 | 1179046 | AE binding protein 1      | Aebp1 | 305494 | 1,21 | up   |
| 6440671 | 7120690 | 1179054 | AE binding protein 1      | Aebp1 | 305494 | 1,32 | up   |
| 6477817 | 7120690 | 1179043 | AE binding protein 1      | Aebp1 | 305494 | 1,01 | up   |
| 6650059 | 7120690 | 1179040 | AE binding protein 1      | Aebp1 | 305494 | 1,04 | down |
| 6704736 | 7120690 | 1179055 | AE binding protein 1      | Aebp1 | 305494 | 1,10 | down |
| 6706031 | 7120690 | 1179053 | AE binding protein 1      | Aebp1 | 305494 | 1,05 | up   |
| 6736011 | 7120690 | 1179054 | AE binding protein 1      | Aebp1 | 305494 | 1,27 | down |
| 6744824 | 7120690 | 1179047 | AE binding protein 1      | Aebp1 | 305494 | 1,24 | down |
| 5711506 | 7067556 | 1050045 | AF4/FMR2 family, member 4 | Aff4  | 303132 | 1,08 | up   |
| 5767867 | 7067556 | 1050049 | AF4/FMR2 family, member 4 | Aff4  | 303132 | 2,44 | down |
| 5827562 | 7067556 | 1050033 | AF4/FMR2 family, member 4 | Aff4  | 303132 | 1,19 | up   |
| 5842156 | 7067556 | 1050047 | AF4/FMR2 family, member 4 | Aff4  | 303132 | 1,21 | up   |
| 5871567 | 7067556 | 1050026 | AF4/FMR2 family, member 4 | Aff4  | 303132 | 1,18 | up   |
| 5941664 | 7067556 | 1050037 | AF4/FMR2 family, member 4 | Aff4  | 303132 | 1,02 | up   |
| 5961661 | 7067556 | 1050027 | AF4/FMR2 family, member 4 | Aff4  | 303132 | 1,12 | up   |
| 5986992 | 7067556 | 1050039 | AF4/FMR2 family, member 4 | Aff4  | 303132 | 1,10 | down |
| 6035587 | 7067556 | 1050048 | AF4/FMR2 family, member 4 | Aff4  | 303132 | 1,26 | up   |
| 6146684 | 7067556 | 1050041 | AF4/FMR2 family, member 4 | Aff4  | 303132 | 1,15 | up   |
| 6158820 | 7067556 | 1050027 | AF4/FMR2 family, member 4 | Aff4  | 303132 | 1,01 | down |
| 6193712 | 7067556 | 1050029 | AF4/FMR2 family, member 4 | Aff4  | 303132 | 1,03 | up   |
| 6210505 | 7067556 | 1050049 | AF4/FMR2 family, member 4 | Aff4  | 303132 | 1,07 | down |
| 6264856 | 7067556 | 1050046 | AF4/FMR2 family, member 4 | Aff4  | 303132 | 1,12 | up   |
| 6282086 | 7067556 | 1050032 | AF4/FMR2 family, member 4 | Aff4  | 303132 | 1,08 | down |
| 6287076 | 7067556 | 1050028 | AF4/FMR2 family, member 4 | Aff4  | 303132 | 1,16 | up   |
| 6372481 | 7067556 | 1050036 | AF4/FMR2 family, member 4 | Aff4  | 303132 | 1,09 | down |
| 6374902 | 7067556 | 1050027 | AF4/FMR2 family, member 4 | Aff4  | 303132 | 1,06 | up   |
| 6430326 | 7067556 | 1050043 | AF4/FMR2 family, member 4 | Aff4  | 303132 | 1,07 | up   |
| 6438951 | 7067556 | 1050044 | AF4/FMR2 family, member 4 | Aff4  | 303132 | 1,18 | up   |
| 6486008 | 7067556 | 1050040 | AF4/FMR2 family, member 4 | Aff4  | 303132 | 1,06 | up   |
| 6520080 | 7067556 | 1050037 | AF4/FMR2 family, member 4 | Aff4  | 303132 | 1,23 | up   |
| 6540112 | 7067556 | 1050022 | AF4/FMR2 family, member 4 | Aff4  | 303132 | 1,13 | down |
| 6548150 | 7067556 | 1050050 | AF4/FMR2 family, member 4 | Aff4  | 303132 | 1,33 | down |
| 6568791 | 7067556 | 1050049 | AF4/FMR2 family, member 4 | Aff4  | 303132 | 1,12 | down |
| 6616817 | 7067556 | 1050035 | AF4/FMR2 family, member 4 | Aff4  | 303132 | 1,04 | down |
| 6646023 | 7067556 | 1050027 | AF4/FMR2 family, member 4 | Aff4  | 303132 | 1,05 | down |
| 6655755 | 7067556 | 1050040 | AF4/FMR2 family, member 4 | Aff4  | 303132 | 1,03 | down |
| 6668453 | 7067556 | 1050038 | AF4/FMR2 family, member 4 | Aff4  | 303132 | 1,13 | down |
| 6672570 | 7067556 | 1050048 | AF4/FMR2 family, member 4 | Aff4  | 303132 | 1,15 | down |
| 5640529 | 7293870 | 1605858 | agrln                     | Agm   | 25592  | 1,12 | up   |
| 5660723 | 7293870 | 1605859 | agrln                     | Agm   | 25592  | 2,95 | down |
| 5667382 | 7293870 | 1605854 | agrln                     | Agm   | 25592  | 1,17 | down |
| 5684722 | 7293870 | 1605880 | agrln                     | Agm   | 25592  | 1,24 | up   |
| 5698755 | 7293870 | 1605871 | agrln                     | Agm   | 25592  | 1,20 | down |
| 5700491 | 7293870 | 1605860 | agrln                     | Agm   | 25592  | 1,21 | down |
| 5711304 | 7293870 | 1605852 | agrln                     | Agm   | 25592  | 1,01 | down |
| 5759961 | 7293870 | 1605859 | agrln                     | Agm   | 25592  | 1,47 | down |
| 5778430 | 7293870 | 1605859 | agrln                     | Agm   | 25592  | 1,07 | up   |
| 5811015 | 7293870 | 1605879 | agrln                     | Agm   | 25592  | 1,23 | up   |
| 5814122 | 7293870 | 1605884 | agrln                     | Agm   | 25592  | 4,30 | down |
| 5830467 | 7293870 | 1605872 | agrln                     | Agm   | 25592  | 1,12 | down |
| 5839298 | 7293870 | 1605857 | agrln                     | Agm   | 25592  | 1,03 | down |
| 5851446 | 7293870 | 1605865 | agrln                     | Agm   | 25592  | 1,25 | up   |
| 5858959 | 7293870 | 1605875 | agrln                     | Agm   | 25592  | 1,34 | up   |

|         |         |         |                                            |         |        |      |      |
|---------|---------|---------|--------------------------------------------|---------|--------|------|------|
| 5872636 | 7293870 | 1605864 | agrin                                      | Agm     | 25592  | 1,17 | down |
| 5895251 | 7293870 | 1605853 | agrin                                      | Agm     | 25592  | 1,40 | up   |
| 5908888 | 7293870 | 1605856 | agrin                                      | Agm     | 25592  | 2,17 | down |
| 5909265 | 7293870 | 1605850 | agrin                                      | Agm     | 25592  | 1,14 | down |
| 5952972 | 7293870 | 1605851 | agrin                                      | Agm     | 25592  | 1,11 | up   |
| 5957655 | 7293870 | 1605877 | agrin                                      | Agm     | 25592  | 1,20 | up   |
| 5968399 | 7293870 | 1605869 | agrin                                      | Agm     | 25592  | 1,09 | down |
| 5988385 | 7293870 | 1605863 | agrin                                      | Agm     | 25592  | 1,55 | up   |
| 6006194 | 7293870 | 1605858 | agrin                                      | Agm     | 25592  | 1,57 | down |
| 6020066 | 7293870 | 1605861 | agrin                                      | Agm     | 25592  | 1,57 | down |
| 6027515 | 7293870 | 1605873 | agrin                                      | Agm     | 25592  | 1,17 | down |
| 6041590 | 7293870 | 1605883 | agrin                                      | Agm     | 25592  | 1,43 | down |
| 6195123 | 7293870 | 1605849 | agrin                                      | Agm     | 25592  | 1,04 | up   |
| 6272933 | 7293870 | 1605866 | agrin                                      | Agm     | 25592  | 1,30 | down |
| 6277750 | 7293870 | 1605882 | agrin                                      | Agm     | 25592  | 1,50 | down |
| 6288380 | 7293870 | 1605884 | agrin                                      | Agm     | 25592  | 2,20 | down |
| 6291195 | 7293870 | 1605874 | agrin                                      | Agm     | 25592  | 1,55 | up   |
| 6292571 | 7293870 | 1605878 | agrin                                      | Agm     | 25592  | 1,08 | up   |
| 6316997 | 7293870 | 1605855 | agrin                                      | Agm     | 25592  | 1,27 | down |
| 6333688 | 7293870 | 1605882 | agrin                                      | Agm     | 25592  | 1,14 | down |
| 6360333 | 7293870 | 1605878 | agrin                                      | Agm     | 25592  | 1,13 | down |
| 6390742 | 7293870 | 1605876 | agrin                                      | Agm     | 25592  | 1,02 | up   |
| 6392617 | 7293870 | 1605868 | agrin                                      | Agm     | 25592  | 1,72 | down |
| 6399048 | 7293870 | 1605877 | agrin                                      | Agm     | 25592  | 1,21 | up   |
| 6420669 | 7293870 | 1605848 | agrin                                      | Agm     | 25592  | 1,10 | up   |
| 6462587 | 7293870 | 1605882 | agrin                                      | Agm     | 25592  | 1,15 | down |
| 6496651 | 7293870 | 1605881 | agrin                                      | Agm     | 25592  | 1,16 | up   |
| 6511366 | 7293870 | 1605862 | agrin                                      | Agm     | 25592  | 1,44 | down |
| 6566305 | 7293870 | 1605871 | agrin                                      | Agm     | 25592  | 1,03 | up   |
| 6598535 | 7293870 | 1605867 | agrin                                      | Agm     | 25592  | 1,00 | down |
| 6710294 | 7293870 | 1605868 | agrin                                      | Agm     | 25592  | 1,39 | up   |
| 6716412 | 7293870 | 1605870 | agrin                                      | Agm     | 25592  | 1,47 | up   |
| 6742736 | 7039589 | 984514  | AHNAK nucleoprotein                        | Ahnak   | 191572 | 1,08 | up   |
| 5650082 | 7199758 | 1375238 | alcohol dehydrogenase 1 (class I)          | Adh1    | 24172  | 2,92 | down |
| 5723540 | 7199758 | 1375235 | alcohol dehydrogenase 1 (class I)          | Adh1    | 24172  | 1,04 | down |
| 5754696 | 7199758 | 1375237 | alcohol dehydrogenase 1 (class I)          | Adh1    | 24172  | 1,20 | up   |
| 5864245 | 7199758 | 1375237 | alcohol dehydrogenase 1 (class I)          | Adh1    | 24172  | 1,86 | up   |
| 6077703 | 7199758 | 1375236 | alcohol dehydrogenase 1 (class I)          | Adh1    | 24172  | 1,42 | up   |
| 6100515 | 7199758 | 1375239 | alcohol dehydrogenase 1 (class I)          | Adh1    | 24172  | 1,11 | up   |
| 6117847 | 7199758 | 1375238 | alcohol dehydrogenase 1 (class I)          | Adh1    | 24172  | 1,03 | down |
| 6152639 | 7199758 | 1375240 | alcohol dehydrogenase 1 (class I)          | Adh1    | 24172  | 2,07 | down |
| 6178871 | 7199758 | 1375242 | alcohol dehydrogenase 1 (class I)          | Adh1    | 24172  | 1,55 | up   |
| 6214089 | 7199758 | 1375239 | alcohol dehydrogenase 1 (class I)          | Adh1    | 24172  | 1,01 | down |
| 6225541 | 7199758 | 1375243 | alcohol dehydrogenase 1 (class I)          | Adh1    | 24172  | 1,76 | down |
| 6293576 | 7199758 | 1375239 | alcohol dehydrogenase 1 (class I)          | Adh1    | 24172  | 1,58 | down |
| 6434838 | 7199758 | 1375241 | alcohol dehydrogenase 1 (class I)          | Adh1    | 24172  | 1,11 | up   |
| 6624406 | 7199758 | 1375243 | alcohol dehydrogenase 1 (class I)          | Adh1    | 24172  | 1,01 | down |
| 5627367 | 7059414 | 1030200 | aldehyde dehydrogenase 3 family, member B1 | Aldh3b1 | 309147 | 1,11 | up   |
| 5665968 | 7059414 | 1030197 | aldehyde dehydrogenase 3 family, member B1 | Aldh3b1 | 309147 | 1,15 | down |
| 5791896 | 7059414 | 1030194 | aldehyde dehydrogenase 3 family, member B1 | Aldh3b1 | 309147 | 1,12 | down |
| 5899038 | 7059414 | 1030195 | aldehyde dehydrogenase 3 family, member B1 | Aldh3b1 | 309147 | 1,35 | up   |
| 5920298 | 7059414 | 1030201 | aldehyde dehydrogenase 3 family, member B1 | Aldh3b1 | 309147 | 2,17 | down |
| 5922787 | 7059414 | 1030198 | aldehyde dehydrogenase 3 family, member B1 | Aldh3b1 | 309147 | 1,05 | up   |
| 6000853 | 7059414 | 1030195 | aldehyde dehydrogenase 3 family, member B1 | Aldh3b1 | 309147 | 1,30 | down |
| 6091971 | 7059414 | 1030193 | aldehyde dehydrogenase 3 family, member B1 | Aldh3b1 | 309147 | 1,14 | up   |
| 6224407 | 7059414 | 1030192 | aldehyde dehydrogenase 3 family, member B1 | Aldh3b1 | 309147 | 1,04 | down |

|         |         |         |                                            |         |        |      |      |
|---------|---------|---------|--------------------------------------------|---------|--------|------|------|
| 6386788 | 7059414 | 1030191 | aldehyde dehydrogenase 3 family, member B1 | Aldh3b1 | 309147 | 1,10 | down |
| 6445154 | 7059414 | 1030196 | aldehyde dehydrogenase 3 family, member B1 | Aldh3b1 | 309147 | 1,02 | up   |
| 6454026 | 7059414 | 1030195 | aldehyde dehydrogenase 3 family, member B1 | Aldh3b1 | 309147 | 1,18 | up   |
| 6666642 | 7059414 | 1030199 | aldehyde dehydrogenase 3 family, member B1 | Aldh3b1 | 309147 | 1,17 | down |
| 6710468 | 7059414 | 1030192 | aldehyde dehydrogenase 3 family, member B1 | Aldh3b1 | 309147 | 1,19 | up   |
| 5624680 | 7354841 | 1756787 | aldehyde oxidase 3                         | Aox3    | 493909 | 1,03 | down |
| 5646017 | 7354841 | 1756793 | aldehyde oxidase 3                         | Aox3    | 493909 | 1,01 | up   |
| 5698895 | 7354841 | 1756793 | aldehyde oxidase 3                         | Aox3    | 493909 | 1,41 | down |
| 5761280 | 7354841 | 1756769 | aldehyde oxidase 3                         | Aox3    | 493909 | 1,16 | up   |
| 5803990 | 7354841 | 1756778 | aldehyde oxidase 3                         | Aox3    | 493909 | 1,01 | down |
| 5804828 | 7354841 | 1756786 | aldehyde oxidase 3                         | Aox3    | 493909 | 1,12 | down |
| 5805923 | 7354841 | 1756768 | aldehyde oxidase 3                         | Aox3    | 493909 | 1,32 | up   |
| 5826106 | 7354841 | 1756790 | aldehyde oxidase 3                         | Aox3    | 493909 | 1,11 | up   |
| 5838692 | 7354841 | 1756767 | aldehyde oxidase 3                         | Aox3    | 493909 | 1,30 | up   |
| 5847885 | 7354841 | 1756781 | aldehyde oxidase 3                         | Aox3    | 493909 | 1,10 | up   |
| 5851512 | 7354841 | 1756792 | aldehyde oxidase 3                         | Aox3    | 493909 | 1,06 | down |
| 5863742 | 7354841 | 1756775 | aldehyde oxidase 3                         | Aox3    | 493909 | 1,10 | down |
| 5879038 | 7354841 | 1756789 | aldehyde oxidase 3                         | Aox3    | 493909 | 1,58 | up   |
| 5881404 | 7354841 | 1756784 | aldehyde oxidase 3                         | Aox3    | 493909 | 1,06 | up   |
| 5924192 | 7354841 | 1756763 | aldehyde oxidase 3                         | Aox3    | 493909 | 1,24 | up   |
| 5928277 | 7354841 | 1756774 | aldehyde oxidase 3                         | Aox3    | 493909 | 1,33 | down |
| 5967268 | 7354841 | 1756765 | aldehyde oxidase 3                         | Aox3    | 493909 | 1,21 | down |
| 5986556 | 7354841 | 1756764 | aldehyde oxidase 3                         | Aox3    | 493909 | 1,22 | down |
| 6002265 | 7354841 | 1756777 | aldehyde oxidase 3                         | Aox3    | 493909 | 1,01 | down |
| 6067555 | 7354841 | 1756788 | aldehyde oxidase 3                         | Aox3    | 493909 | 1,05 | up   |
| 6076303 | 7354841 | 1756785 | aldehyde oxidase 3                         | Aox3    | 493909 | 1,01 | down |
| 6118499 | 7354841 | 1756779 | aldehyde oxidase 3                         | Aox3    | 493909 | 1,17 | up   |
| 6122959 | 7354841 | 1756760 | aldehyde oxidase 3                         | Aox3    | 493909 | 1,61 | up   |
| 6187018 | 7354841 | 1756771 | aldehyde oxidase 3                         | Aox3    | 493909 | 1,01 | up   |
| 6198045 | 7354841 | 1756783 | aldehyde oxidase 3                         | Aox3    | 493909 | 1,03 | down |
| 6210143 | 7354841 | 1756782 | aldehyde oxidase 3                         | Aox3    | 493909 | 1,06 | up   |
| 6215287 | 7354841 | 1756791 | aldehyde oxidase 3                         | Aox3    | 493909 | 1,20 | up   |
| 6319061 | 7354841 | 1756771 | aldehyde oxidase 3                         | Aox3    | 493909 | 1,27 | down |
| 6339083 | 7354841 | 1756766 | aldehyde oxidase 3                         | Aox3    | 493909 | 1,27 | down |
| 6395418 | 7354841 | 1756770 | aldehyde oxidase 3                         | Aox3    | 493909 | 1,05 | down |
| 6402352 | 7354841 | 1756761 | aldehyde oxidase 3                         | Aox3    | 493909 | 1,46 | down |
| 6466522 | 7354841 | 1756776 | aldehyde oxidase 3                         | Aox3    | 493909 | 1,13 | up   |
| 6478660 | 7354841 | 1756760 | aldehyde oxidase 3                         | Aox3    | 493909 | 1,10 | down |
| 6485745 | 7354841 | 1756762 | aldehyde oxidase 3                         | Aox3    | 493909 | 1,16 | up   |
| 6647275 | 7354841 | 1756764 | aldehyde oxidase 3                         | Aox3    | 493909 | 1,24 | down |
| 6663668 | 7354841 | 1756780 | aldehyde oxidase 3                         | Aox3    | 493909 | 2,35 | down |
| 6680832 | 7354841 | 1756773 | aldehyde oxidase 3                         | Aox3    | 493909 | 1,01 | up   |
| 6713778 | 7354841 | 1756772 | aldehyde oxidase 3                         | Aox3    | 493909 | 1,03 | down |
| 5619842 | 7354870 | 1756915 | aldehyde oxidase 3-like 1                  | Aox3l1  | 316421 | 1,57 | up   |
| 5677438 | 7354870 | 1756911 | aldehyde oxidase 3-like 1                  | Aox3l1  | 316421 | 1,04 | up   |
| 5678024 | 7354870 | 1756927 | aldehyde oxidase 3-like 1                  | Aox3l1  | 316421 | 1,44 | up   |
| 5735506 | 7354870 | 1756928 | aldehyde oxidase 3-like 1                  | Aox3l1  | 316421 | 1,97 | up   |
| 5739806 | 7354870 | 1756925 | aldehyde oxidase 3-like 1                  | Aox3l1  | 316421 | 1,32 | up   |
| 5787683 | 7354870 | 1756903 | aldehyde oxidase 3-like 1                  | Aox3l1  | 316421 | 1,05 | down |
| 5819769 | 7354870 | 1756905 | aldehyde oxidase 3-like 1                  | Aox3l1  | 316421 | 1,01 | down |
| 5839925 | 7354870 | 1756924 | aldehyde oxidase 3-like 1                  | Aox3l1  | 316421 | 1,12 | down |
| 5891489 | 7354870 | 1756904 | aldehyde oxidase 3-like 1                  | Aox3l1  | 316421 | 1,25 | down |
| 5958793 | 7354870 | 1756918 | aldehyde oxidase 3-like 1                  | Aox3l1  | 316421 | 1,36 | up   |
| 6069901 | 7354870 | 1756916 | aldehyde oxidase 3-like 1                  | Aox3l1  | 316421 | 1,03 | up   |
| 6071714 | 7354870 | 1756900 | aldehyde oxidase 3-like 1                  | Aox3l1  | 316421 | 1,04 | up   |
| 6087603 | 7354870 | 1756931 | aldehyde oxidase 3-like 1                  | Aox3l1  | 316421 | 1,57 | down |

|         |         |         |                                                             |         |        |      |      |
|---------|---------|---------|-------------------------------------------------------------|---------|--------|------|------|
| 6146529 | 7354870 | 1756932 | aldehyde oxidase 3-like 1                                   | Aox31l  | 316421 | 1,02 | down |
| 6151096 | 7354870 | 1756923 | aldehyde oxidase 3-like 1                                   | Aox31l  | 316421 | 1,33 | up   |
| 6263715 | 7354870 | 1756909 | aldehyde oxidase 3-like 1                                   | Aox31l  | 316421 | 1,07 | down |
| 6266810 | 7354870 | 1756906 | aldehyde oxidase 3-like 1                                   | Aox31l  | 316421 | 1,35 | up   |
| 6292480 | 7354870 | 1756914 | aldehyde oxidase 3-like 1                                   | Aox31l  | 316421 | 1,12 | up   |
| 6358379 | 7354870 | 1756920 | aldehyde oxidase 3-like 1                                   | Aox31l  | 316421 | 1,29 | up   |
| 6371612 | 7354870 | 1756912 | aldehyde oxidase 3-like 1                                   | Aox31l  | 316421 | 1,22 | up   |
| 6435451 | 7354870 | 1756913 | aldehyde oxidase 3-like 1                                   | Aox31l  | 316421 | 1,73 | up   |
| 6467918 | 7354870 | 1756926 | aldehyde oxidase 3-like 1                                   | Aox31l  | 316421 | 1,06 | down |
| 6521756 | 7354870 | 1756901 | aldehyde oxidase 3-like 1                                   | Aox31l  | 316421 | 1,20 | down |
| 6522410 | 7354870 | 1756907 | aldehyde oxidase 3-like 1                                   | Aox31l  | 316421 | 1,00 | down |
| 6526460 | 7354870 | 1756921 | aldehyde oxidase 3-like 1                                   | Aox31l  | 316421 | 1,05 | up   |
| 6565854 | 7354870 | 1756917 | aldehyde oxidase 3-like 1                                   | Aox31l  | 316421 | 1,04 | up   |
| 6571688 | 7354870 | 1756922 | aldehyde oxidase 3-like 1                                   | Aox31l  | 316421 | 1,41 | up   |
| 6578273 | 7354870 | 1756929 | aldehyde oxidase 3-like 1                                   | Aox31l  | 316421 | 1,56 | down |
| 6614186 | 7354870 | 1756898 | aldehyde oxidase 3-like 1                                   | Aox31l  | 316421 | 1,06 | up   |
| 6627213 | 7354870 | 1756930 | aldehyde oxidase 3-like 1                                   | Aox31l  | 316421 | 1,08 | down |
| 6637758 | 7354870 | 1756899 | aldehyde oxidase 3-like 1                                   | Aox31l  | 316421 | 1,45 | down |
| 6638790 | 7354870 | 1756908 | aldehyde oxidase 3-like 1                                   | Aox31l  | 316421 | 1,14 | up   |
| 6670970 | 7354870 | 1756910 | aldehyde oxidase 3-like 1                                   | Aox31l  | 316421 | 1,49 | down |
| 6675129 | 7354870 | 1756919 | aldehyde oxidase 3-like 1                                   | Aox31l  | 316421 | 2,17 | up   |
| 6695936 | 7354870 | 1756902 | aldehyde oxidase 3-like 1                                   | Aox31l  | 316421 | 1,11 | down |
| 5636284 | 7252383 | 1503517 | aldo-keto reductase family 1, member B10 (aldose reductase) | Akr1b10 | 296972 | 1,09 | down |
| 5761227 | 7252383 | 1503527 | aldo-keto reductase family 1, member B10 (aldose reductase) | Akr1b10 | 296972 | 1,27 | up   |
| 5850008 | 7252383 | 1503519 | aldo-keto reductase family 1, member B10 (aldose reductase) | Akr1b10 | 296972 | 1,25 | down |
| 5861155 | 7252383 | 1503518 | aldo-keto reductase family 1, member B10 (aldose reductase) | Akr1b10 | 296972 | 1,17 | up   |
| 5898936 | 7252383 | 1503520 | aldo-keto reductase family 1, member B10 (aldose reductase) | Akr1b10 | 296972 | 1,18 | down |
| 5902140 | 7252383 | 1503521 | aldo-keto reductase family 1, member B10 (aldose reductase) | Akr1b10 | 296972 | 1,39 | down |
| 5980539 | 7252383 | 1503524 | aldo-keto reductase family 1, member B10 (aldose reductase) | Akr1b10 | 296972 | 1,09 | up   |
| 5990472 | 7252383 | 1503527 | aldo-keto reductase family 1, member B10 (aldose reductase) | Akr1b10 | 296972 | 1,34 | down |
| 6375636 | 7252383 | 1503526 | aldo-keto reductase family 1, member B10 (aldose reductase) | Akr1b10 | 296972 | 1,04 | down |
| 6443602 | 7252383 | 1503525 | aldo-keto reductase family 1, member B10 (aldose reductase) | Akr1b10 | 296972 | 1,05 | up   |
| 6464522 | 7252383 | 1503528 | aldo-keto reductase family 1, member B10 (aldose reductase) | Akr1b10 | 296972 | 1,17 | down |
| 6585156 | 7252383 | 1503522 | aldo-keto reductase family 1, member B10 (aldose reductase) | Akr1b10 | 296972 | 3,71 | up   |
| 6698449 | 7252383 | 1503523 | aldo-keto reductase family 1, member B10 (aldose reductase) | Akr1b10 | 296972 | 2,44 | up   |
| 5772486 | 7252382 | 1503513 | aldo-keto reductase family 1, member B8                     | Akr1b8  | 286921 | 3,39 | up   |
| 6017805 | 7252382 | 1503512 | aldo-keto reductase family 1, member B8                     | Akr1b8  | 286921 | 2,32 | down |
| 6061149 | 7252382 | 1503515 | aldo-keto reductase family 1, member B8                     | Akr1b8  | 286921 | 1,40 | up   |
| 6150769 | 7252382 | 1503511 | aldo-keto reductase family 1, member B8                     | Akr1b8  | 286921 | 1,24 | up   |
| 6406425 | 7252382 | 1503506 | aldo-keto reductase family 1, member B8                     | Akr1b8  | 286921 | 2,00 | down |
| 6471856 | 7252382 | 1503509 | aldo-keto reductase family 1, member B8                     | Akr1b8  | 286921 | 1,68 | up   |
| 6490386 | 7252382 | 1503514 | aldo-keto reductase family 1, member B8                     | Akr1b8  | 286921 | 1,72 | down |
| 6537267 | 7252382 | 1503508 | aldo-keto reductase family 1, member B8                     | Akr1b8  | 286921 | 2,32 | up   |
| 6705980 | 7252382 | 1503506 | aldo-keto reductase family 1, member B8                     | Akr1b8  | 286921 | 2,06 | down |
| 5620261 | 7079963 | 1079466 | aldolase C, fructose-bisphosphate                           | Aldoc   | 24191  | 1,20 | down |
| 5744327 | 7079963 | 1079471 | aldolase C, fructose-bisphosphate                           | Aldoc   | 24191  | 1,00 | up   |
| 5784578 | 7079963 | 1079464 | aldolase C, fructose-bisphosphate                           | Aldoc   | 24191  | 2,08 | down |
| 5799929 | 7079963 | 1079472 | aldolase C, fructose-bisphosphate                           | Aldoc   | 24191  | 1,12 | up   |
| 5863486 | 7079963 | 1079467 | aldolase C, fructose-bisphosphate                           | Aldoc   | 24191  | 1,20 | up   |
| 5896112 | 7079963 | 1079466 | aldolase C, fructose-bisphosphate                           | Aldoc   | 24191  | 1,12 | up   |
| 6224654 | 7079963 | 1079468 | aldolase C, fructose-bisphosphate                           | Aldoc   | 24191  | 1,44 | up   |
| 6228939 | 7079963 | 1079465 | aldolase C, fructose-bisphosphate                           | Aldoc   | 24191  | 1,35 | down |
| 6253599 | 7079963 | 1079469 | aldolase C, fructose-bisphosphate                           | Aldoc   | 24191  | 1,10 | up   |
| 6400427 | 7079963 | 1079470 | aldolase C, fructose-bisphosphate                           | Aldoc   | 24191  | 1,08 | up   |
| 6633146 | 7079963 | 1079471 | aldolase C, fructose-bisphosphate                           | Aldoc   | 24191  | 1,13 | up   |
| 6654150 | 7079963 | 1079464 | aldolase C, fructose-bisphosphate                           | Aldoc   | 24191  | 1,39 | up   |

|         |         |         |                                                                 |                                            |                   |      |      |
|---------|---------|---------|-----------------------------------------------------------------|--------------------------------------------|-------------------|------|------|
| 6675067 | 7079963 | 1079465 | aldolase C, fructose-bisphosphate                               | Aldoc                                      | 24191             | 1,22 | down |
| 5633651 | 7276905 | 1564807 | alkaline ceramidase 2                                           | Acer2                                      | 313339            | 1,41 | up   |
| 5710761 | 7276905 | 1564817 | alkaline ceramidase 2                                           | Acer2                                      | 313339            | 1,13 | down |
| 5732634 | 7276905 | 1564817 | alkaline ceramidase 2                                           | Acer2                                      | 313339            | 1,19 | down |
| 5765082 | 7276905 | 1564817 | alkaline ceramidase 2                                           | Acer2                                      | 313339            | 1,37 | up   |
| 5793428 | 7276905 | 1564813 | alkaline ceramidase 2                                           | Acer2                                      | 313339            | 1,06 | up   |
| 5804977 | 7276905 | 1564819 | alkaline ceramidase 2                                           | Acer2                                      | 313339            | 1,00 | up   |
| 5826680 | 7276905 | 1564817 | alkaline ceramidase 2                                           | Acer2                                      | 313339            | 1,22 | down |
| 5944870 | 7276905 | 1564815 | alkaline ceramidase 2                                           | Acer2                                      | 313339            | 1,41 | down |
| 6025509 | 7276905 | 1564819 | alkaline ceramidase 2                                           | Acer2                                      | 313339            | 1,20 | up   |
| 6275434 | 7276905 | 1564817 | alkaline ceramidase 2                                           | Acer2                                      | 313339            | 1,17 | up   |
| 6294471 | 7276905 | 1564812 | alkaline ceramidase 2                                           | Acer2                                      | 313339            | 1,37 | down |
| 6487936 | 7276905 | 1564820 | alkaline ceramidase 2                                           | Acer2                                      | 313339            | 1,22 | up   |
| 6508480 | 7276905 | 1564817 | alkaline ceramidase 2                                           | Acer2                                      | 313339            | 1,09 | down |
| 6567617 | 7276905 | 1564812 | alkaline ceramidase 2                                           | Acer2                                      | 313339            | 2,22 | up   |
| 6588963 | 7276905 | 1564807 | alkaline ceramidase 2                                           | Acer2                                      | 313339            | 1,53 | up   |
| 6616588 | 7276905 | 1564819 | alkaline ceramidase 2                                           | Acer2                                      | 313339            | 1,14 | up   |
| 6627301 | 7276905 | 1564817 | alkaline ceramidase 2                                           | Acer2                                      | 313339            | 1,19 | up   |
| 6640248 | 7276905 | 1564818 | alkaline ceramidase 2                                           | Acer2                                      | 313339            | 1,68 | down |
| 6682170 | 7276905 | 1564809 | alkaline ceramidase 2                                           | Acer2                                      | 313339            | 1,47 | down |
| 5711856 | 7258105 | 1518002 | alpha-1-inhibitor III                                           | LOC297568                                  | 297568            | 1,11 | up   |
| 5805561 | 7258105 | 1518008 | alpha-1-inhibitor III                                           | LOC297568                                  | 297568            | 1,70 | down |
| 5839311 | 7258105 | 1518013 | alpha-1-inhibitor III                                           | LOC297568                                  | 297568            | 1,10 | up   |
| 5860016 | 7258105 | 1517999 | alpha-1-inhibitor III                                           | LOC297568                                  | 297568            | 1,00 | up   |
| 6038308 | 7258105 | 1518008 | alpha-1-inhibitor III                                           | LOC297568                                  | 297568            | 1,23 | down |
| 6050609 | 7258105 | 1518018 | alpha-1-inhibitor III                                           | LOC297568                                  | 297568            | 1,00 | up   |
| 6057578 | 7258105 | 1518007 | alpha-1-inhibitor III                                           | LOC297568                                  | 297568            | 1,28 | up   |
| 6202473 | 7258105 | 1518003 | alpha-1-inhibitor III                                           | LOC297568                                  | 297568            | 1,02 | up   |
| 6320443 | 7258105 | 1518010 | alpha-1-inhibitor III                                           | LOC297568                                  | 297568            | 2,01 | down |
| 6353421 | 7258105 | 1517998 | alpha-1-inhibitor III                                           | LOC297568                                  | 297568            | 1,87 | up   |
| 6400962 | 7258105 | 1518011 | alpha-1-inhibitor III                                           | LOC297568                                  | 297568            | 1,00 | up   |
| 6518246 | 7258105 | 1518000 | alpha-1-inhibitor III                                           | LOC297568                                  | 297568            | 1,05 | down |
| 6521946 | 7258105 | 1517990 | alpha-1-inhibitor III                                           | LOC297568                                  | 297568            | 1,93 | up   |
| 6560992 | 7258105 | 1518005 | alpha-1-inhibitor III                                           | LOC297568                                  | 297568            | 1,25 | up   |
| 6564356 | 7258105 | 1517993 | alpha-1-inhibitor III                                           | LOC297568                                  | 297568            | 1,33 | down |
| 5852738 | 7258105 | 1517991 | alpha-1-inhibitor III /// murinoglobulin 1                      | _OC297568 /// Mug                          | 297568 /// 497794 | 1,21 | up   |
| 5980672 | 7258105 | 1517989 | alpha-1-inhibitor III /// murinoglobulin 1                      | _OC297568 /// Mug                          | 297568 /// 497794 | 1,86 | up   |
| 6567765 | 7258105 | 1517992 | alpha-1-inhibitor III /// murinoglobulin 1                      | _OC297568 /// Mug                          | 297568 /// 497794 | 1,07 | down |
| 6636337 | 7258105 | 1517987 | alpha-1-inhibitor III /// murinoglobulin 1                      | _OC297568 /// Mug                          | 297568 /// 497794 | 1,16 | up   |
| 6709429 | 7258105 | 1517991 | alpha-1-inhibitor III /// murinoglobulin 1                      | _OC297568 /// Mug                          | 297568 /// 497794 | 1,03 | down |
| 5641889 | 7258105 | 1517985 | alpha-1-inhibitor III /// murinoglobulin 1 /// murinoglobulin 2 | 297568 /// Mug1 /// 568 /// 497794 /// 408 | 1,36              | up   |      |
| 5920281 | 7258105 | 1517986 | alpha-1-inhibitor III /// murinoglobulin 1 /// murinoglobulin 2 | 297568 /// Mug1 /// 568 /// 497794 /// 408 | 1,24              | up   |      |
| 6499812 | 7258105 | 1517984 | alpha-1-inhibitor III /// murinoglobulin 1 /// murinoglobulin 2 | 297568 /// Mug1 /// 568 /// 497794 /// 408 | 1,23              | up   |      |
| 5633277 | 7258105 | 1518006 | alpha-1-inhibitor III /// murinoglobulin 2                      | _OC297568 /// Mug:                         | 297568 /// 408236 | 1,15 | up   |
| 5663676 | 7258105 | 1518008 | alpha-1-inhibitor III /// murinoglobulin 2                      | _OC297568 /// Mug:                         | 297568 /// 408236 | 1,27 | down |
| 5702401 | 7258105 | 1517988 | alpha-1-inhibitor III /// murinoglobulin 2                      | _OC297568 /// Mug:                         | 297568 /// 408236 | 1,54 | down |
| 5864632 | 7258105 | 1518009 | alpha-1-inhibitor III /// murinoglobulin 2                      | _OC297568 /// Mug:                         | 297568 /// 408236 | 1,00 | up   |
| 6084621 | 7258105 | 1518012 | alpha-1-inhibitor III /// murinoglobulin 2                      | _OC297568 /// Mug:                         | 297568 /// 408236 | 1,10 | up   |
| 6325570 | 7258105 | 1517997 | alpha-1-inhibitor III /// murinoglobulin 2                      | _OC297568 /// Mug:                         | 297568 /// 408236 | 1,32 | down |
| 6381121 | 7258105 | 1518014 | alpha-1-inhibitor III /// murinoglobulin 2                      | _OC297568 /// Mug:                         | 297568 /// 408236 | 1,74 | down |
| 6403323 | 7258105 | 1518001 | alpha-1-inhibitor III /// murinoglobulin 2                      | _OC297568 /// Mug:                         | 297568 /// 408236 | 1,17 | up   |
| 6694764 | 7258105 | 1518004 | alpha-1-inhibitor III /// murinoglobulin 2                      | _OC297568 /// Mug:                         | 297568 /// 408236 | 1,17 | up   |
| 6273765 | 7258105 | 1517995 | alpha-1-inhibitor III /// murinoglobulin 2 /// murinoglobulin 1 | 297568 /// Mug2 /// 568 /// 408236 /// 497 | 1,27              | down |      |
| 6296741 | 7258105 | 1517996 | alpha-1-inhibitor III /// murinoglobulin 2 /// murinoglobulin 1 | 297568 /// Mug2 /// 568 /// 408236 /// 497 | 1,02              | down |      |
| 6504705 | 7258105 | 1517994 | alpha-1-inhibitor III /// murinoglobulin 2 /// murinoglobulin 1 | 297568 /// Mug2 /// 568 /// 408236 /// 497 | 1,04              | down |      |
| 6508670 | 7258105 | 1518017 | alpha-1-inhibitor III /// similar to Murinoglobulin 1 homolog   | _297568 /// RGD156                         | 297568 /// 297572 | 1,00 | up   |

|         |         |         |                                                                                                                             |        |        |      |      |
|---------|---------|---------|-----------------------------------------------------------------------------------------------------------------------------|--------|--------|------|------|
| 6296297 | 7258105 | 1518015 | alpha-1-inhibitor III /// similar to Murinoglobulin 1 homolog /// murinoglobulin 2 ÿ68 /// RGD1566313568 /// 297572 /// 408 |        | 1,48   | up   |      |
| 6348493 | 7258105 | 1518016 | alpha-1-inhibitor III /// similar to Murinoglobulin 1 homolog /// murinoglobulin 2 ÿ68 /// RGD1566313568 /// 297572 /// 408 |        | 1,09   | down |      |
| 5638271 | 7258100 | 1517966 | alpha-2-macroglobulin                                                                                                       | A2m    | 24153  | 1,05 | down |
| 5673845 | 7258100 | 1517955 | alpha-2-macroglobulin                                                                                                       | A2m    | 24153  | 1,39 | down |
| 5677744 | 7258100 | 1517948 | alpha-2-macroglobulin                                                                                                       | A2m    | 24153  | 1,79 | up   |
| 5698333 | 7258100 | 1517958 | alpha-2-macroglobulin                                                                                                       | A2m    | 24153  | 1,11 | up   |
| 5714458 | 7258100 | 1517975 | alpha-2-macroglobulin                                                                                                       | A2m    | 24153  | 1,32 | up   |
| 5720405 | 7258100 | 1517960 | alpha-2-macroglobulin                                                                                                       | A2m    | 24153  | 1,06 | up   |
| 5755022 | 7258100 | 1517967 | alpha-2-macroglobulin                                                                                                       | A2m    | 24153  | 1,04 | up   |
| 5781084 | 7258100 | 1517961 | alpha-2-macroglobulin                                                                                                       | A2m    | 24153  | 1,75 | down |
| 5795135 | 7258100 | 1517972 | alpha-2-macroglobulin                                                                                                       | A2m    | 24153  | 1,05 | up   |
| 5810896 | 7258100 | 1517949 | alpha-2-macroglobulin                                                                                                       | A2m    | 24153  | 1,60 | up   |
| 5839062 | 7258100 | 1517953 | alpha-2-macroglobulin                                                                                                       | A2m    | 24153  | 1,86 | up   |
| 5872908 | 7258100 | 1517979 | alpha-2-macroglobulin                                                                                                       | A2m    | 24153  | 1,09 | up   |
| 5877355 | 7258100 | 1517949 | alpha-2-macroglobulin                                                                                                       | A2m    | 24153  | 1,06 | down |
| 5897530 | 7258100 | 1517952 | alpha-2-macroglobulin                                                                                                       | A2m    | 24153  | 1,04 | down |
| 5945193 | 7258100 | 1517971 | alpha-2-macroglobulin                                                                                                       | A2m    | 24153  | 1,06 | down |
| 5976615 | 7258100 | 1517951 | alpha-2-macroglobulin                                                                                                       | A2m    | 24153  | 1,09 | down |
| 5980127 | 7258100 | 1517957 | alpha-2-macroglobulin                                                                                                       | A2m    | 24153  | 1,29 | up   |
| 6049292 | 7258100 | 1517961 | alpha-2-macroglobulin                                                                                                       | A2m    | 24153  | 1,04 | up   |
| 6080333 | 7258100 | 1517970 | alpha-2-macroglobulin                                                                                                       | A2m    | 24153  | 1,23 | up   |
| 6170521 | 7258100 | 1517965 | alpha-2-macroglobulin                                                                                                       | A2m    | 24153  | 1,48 | down |
| 6173395 | 7258100 | 1517976 | alpha-2-macroglobulin                                                                                                       | A2m    | 24153  | 1,55 | down |
| 6173516 | 7258100 | 1517966 | alpha-2-macroglobulin                                                                                                       | A2m    | 24153  | 1,08 | up   |
| 6181248 | 7258100 | 1517973 | alpha-2-macroglobulin                                                                                                       | A2m    | 24153  | 1,38 | down |
| 6215953 | 7258100 | 1517958 | alpha-2-macroglobulin                                                                                                       | A2m    | 24153  | 1,18 | up   |
| 6254071 | 7258100 | 1517956 | alpha-2-macroglobulin                                                                                                       | A2m    | 24153  | 1,14 | up   |
| 6270624 | 7258100 | 1517964 | alpha-2-macroglobulin                                                                                                       | A2m    | 24153  | 1,80 | down |
| 6271157 | 7258100 | 1517978 | alpha-2-macroglobulin                                                                                                       | A2m    | 24153  | 1,48 | down |
| 6322240 | 7258100 | 1517950 | alpha-2-macroglobulin                                                                                                       | A2m    | 24153  | 1,19 | down |
| 6325264 | 7258100 | 1517959 | alpha-2-macroglobulin                                                                                                       | A2m    | 24153  | 1,19 | down |
| 6343305 | 7258100 | 1517947 | alpha-2-macroglobulin                                                                                                       | A2m    | 24153  | 1,11 | down |
| 6351094 | 7258100 | 1517971 | alpha-2-macroglobulin                                                                                                       | A2m    | 24153  | 1,32 | up   |
| 6359547 | 7258100 | 1517977 | alpha-2-macroglobulin                                                                                                       | A2m    | 24153  | 1,00 | up   |
| 6379689 | 7258100 | 1517968 | alpha-2-macroglobulin                                                                                                       | A2m    | 24153  | 1,08 | up   |
| 6389216 | 7258100 | 1517951 | alpha-2-macroglobulin                                                                                                       | A2m    | 24153  | 2,23 | up   |
| 6425018 | 7258100 | 1517946 | alpha-2-macroglobulin                                                                                                       | A2m    | 24153  | 1,05 | up   |
| 6426696 | 7258100 | 1517946 | alpha-2-macroglobulin                                                                                                       | A2m    | 24153  | 1,31 | up   |
| 6537074 | 7258100 | 1517969 | alpha-2-macroglobulin                                                                                                       | A2m    | 24153  | 1,94 | up   |
| 6547414 | 7258100 | 1517962 | alpha-2-macroglobulin                                                                                                       | A2m    | 24153  | 1,15 | down |
| 6612009 | 7258100 | 1517945 | alpha-2-macroglobulin                                                                                                       | A2m    | 24153  | 1,24 | down |
| 6622350 | 7258100 | 1517963 | alpha-2-macroglobulin                                                                                                       | A2m    | 24153  | 1,20 | up   |
| 6687263 | 7258100 | 1517954 | alpha-2-macroglobulin                                                                                                       | A2m    | 24153  | 1,57 | down |
| 6718098 | 7258100 | 1517974 | alpha-2-macroglobulin                                                                                                       | A2m    | 24153  | 1,07 | up   |
| 5676307 | 7213945 | 1407850 | alpha-kinase 1                                                                                                              | Alpk1  | 310879 | 1,27 | up   |
| 5773521 | 7213945 | 1407853 | alpha-kinase 1                                                                                                              | Alpk1  | 310879 | 1,23 | up   |
| 5829989 | 7213945 | 1407839 | alpha-kinase 1                                                                                                              | Alpk1  | 310879 | 1,10 | down |
| 6288029 | 7213945 | 1407838 | alpha-kinase 1                                                                                                              | Alpk1  | 310879 | 1,29 | up   |
| 6418702 | 7213945 | 1407842 | alpha-kinase 1                                                                                                              | Alpk1  | 310879 | 1,34 | down |
| 6428332 | 7213945 | 1407837 | alpha-kinase 1                                                                                                              | Alpk1  | 310879 | 1,03 | up   |
| 6726522 | 7213945 | 1407838 | alpha-kinase 1                                                                                                              | Alpk1  | 310879 | 1,23 | up   |
| 6395115 | 7033504 | 969868  | alpha-kinase 3                                                                                                              | Alpk3  | 365298 | 1,05 | down |
| 5965445 | 7340757 | 1721909 | ALS2 C-terminal like                                                                                                        | Als2cl | 316017 | 1,91 | up   |
| 5977888 | 7340757 | 1721909 | ALS2 C-terminal like                                                                                                        | Als2cl | 316017 | 1,02 | up   |
| 6080493 | 7340757 | 1721881 | ALS2 C-terminal like                                                                                                        | Als2cl | 316017 | 1,01 | down |
| 6285132 | 7340757 | 1721909 | ALS2 C-terminal like                                                                                                        | Als2cl | 316017 | 1,14 | down |

|         |         |         |                                    |       |        |      |      |
|---------|---------|---------|------------------------------------|-------|--------|------|------|
| 5650805 | 7255663 | 1511707 | Alstrom syndrome 1 homolog (human) | Alms1 | 297408 | 1,25 | up   |
| 5784908 | 7255663 | 1511700 | Alstrom syndrome 1 homolog (human) | Alms1 | 297408 | 1,25 | down |
| 5800578 | 7255663 | 1511716 | Alstrom syndrome 1 homolog (human) | Alms1 | 297408 | 1,47 | up   |
| 5875224 | 7255663 | 1511724 | Alstrom syndrome 1 homolog (human) | Alms1 | 297408 | 1,32 | up   |
| 5942648 | 7255663 | 1511716 | Alstrom syndrome 1 homolog (human) | Alms1 | 297408 | 1,08 | up   |
| 5949292 | 7255663 | 1511695 | Alstrom syndrome 1 homolog (human) | Alms1 | 297408 | 1,20 | down |
| 6068216 | 7255663 | 1511689 | Alstrom syndrome 1 homolog (human) | Alms1 | 297408 | 1,06 | up   |
| 6086872 | 7255663 | 1511706 | Alstrom syndrome 1 homolog (human) | Alms1 | 297408 | 1,36 | up   |
| 6098224 | 7255663 | 1511705 | Alstrom syndrome 1 homolog (human) | Alms1 | 297408 | 1,07 | up   |
| 6123250 | 7255663 | 1511704 | Alstrom syndrome 1 homolog (human) | Alms1 | 297408 | 1,32 | down |
| 6131496 | 7255663 | 1511718 | Alstrom syndrome 1 homolog (human) | Alms1 | 297408 | 1,15 | down |
| 6147953 | 7255663 | 1511694 | Alstrom syndrome 1 homolog (human) | Alms1 | 297408 | 1,08 | down |
| 6156542 | 7255663 | 1511720 | Alstrom syndrome 1 homolog (human) | Alms1 | 297408 | 1,39 | up   |
| 6156721 | 7255663 | 1511702 | Alstrom syndrome 1 homolog (human) | Alms1 | 297408 | 1,45 | down |
| 6176219 | 7255663 | 1511690 | Alstrom syndrome 1 homolog (human) | Alms1 | 297408 | 2,04 | down |
| 6176898 | 7255663 | 1511689 | Alstrom syndrome 1 homolog (human) | Alms1 | 297408 | 1,09 | down |
| 6224346 | 7255663 | 1511691 | Alstrom syndrome 1 homolog (human) | Alms1 | 297408 | 1,04 | down |
| 6326063 | 7255663 | 1511699 | Alstrom syndrome 1 homolog (human) | Alms1 | 297408 | 1,08 | down |
| 6332423 | 7255663 | 1511710 | Alstrom syndrome 1 homolog (human) | Alms1 | 297408 | 1,04 | up   |
| 6356706 | 7255663 | 1511703 | Alstrom syndrome 1 homolog (human) | Alms1 | 297408 | 1,10 | down |
| 6380627 | 7255663 | 1511705 | Alstrom syndrome 1 homolog (human) | Alms1 | 297408 | 1,03 | up   |
| 6416401 | 7255663 | 1511702 | Alstrom syndrome 1 homolog (human) | Alms1 | 297408 | 1,11 | down |
| 6438589 | 7255663 | 1511701 | Alstrom syndrome 1 homolog (human) | Alms1 | 297408 | 1,23 | down |
| 6439982 | 7255663 | 1511709 | Alstrom syndrome 1 homolog (human) | Alms1 | 297408 | 1,01 | down |
| 6539137 | 7255663 | 1511705 | Alstrom syndrome 1 homolog (human) | Alms1 | 297408 | 1,26 | up   |
| 6599139 | 7255663 | 1511718 | Alstrom syndrome 1 homolog (human) | Alms1 | 297408 | 1,28 | down |
| 6608919 | 7255663 | 1511717 | Alstrom syndrome 1 homolog (human) | Alms1 | 297408 | 1,04 | down |
| 6626250 | 7255663 | 1511691 | Alstrom syndrome 1 homolog (human) | Alms1 | 297408 | 1,09 | up   |
| 6631664 | 7255663 | 1511706 | Alstrom syndrome 1 homolog (human) | Alms1 | 297408 | 1,51 | up   |
| 6652849 | 7255663 | 1511705 | Alstrom syndrome 1 homolog (human) | Alms1 | 297408 | 1,47 | down |
| 6682461 | 7255663 | 1511708 | Alstrom syndrome 1 homolog (human) | Alms1 | 297408 | 1,12 | up   |
| 5930683 | 7324519 | 1682359 | ALX homeobox 1                     | Alx1  | 25401  | 1,31 | up   |
| 6107191 | 7324519 | 1682356 | ALX homeobox 1                     | Alx1  | 25401  | 1,21 | down |
| 6306267 | 7324519 | 1682359 | ALX homeobox 1                     | Alx1  | 25401  | 3,10 | up   |
| 6461866 | 7324519 | 1682359 | ALX homeobox 1                     | Alx1  | 25401  | 1,68 | down |
| 6537552 | 7324519 | 1682359 | ALX homeobox 1                     | Alx1  | 25401  | 1,42 | down |
| 6558942 | 7324519 | 1682359 | ALX homeobox 1                     | Alx1  | 25401  | 1,36 | up   |
| 6600653 | 7324519 | 1682358 | ALX homeobox 1                     | Alx1  | 25401  | 1,37 | up   |
| 6608568 | 7324519 | 1682357 | ALX homeobox 1                     | Alx1  | 25401  | 1,11 | up   |
| 5618414 | 7150676 | 1252324 | aminoadipate aminotransferase      | Aadat | 29416  | 1,36 | up   |
| 5884369 | 7150676 | 1252325 | aminoadipate aminotransferase      | Aadat | 29416  | 1,24 | up   |
| 5998698 | 7150676 | 1252323 | aminoadipate aminotransferase      | Aadat | 29416  | 1,01 | down |
| 6088381 | 7150676 | 1252331 | aminoadipate aminotransferase      | Aadat | 29416  | 1,02 | up   |
| 6112464 | 7150676 | 1252326 | aminoadipate aminotransferase      | Aadat | 29416  | 1,17 | up   |
| 6170029 | 7150676 | 1252329 | aminoadipate aminotransferase      | Aadat | 29416  | 1,40 | down |
| 6197916 | 7150676 | 1252335 | aminoadipate aminotransferase      | Aadat | 29416  | 1,01 | down |
| 6233689 | 7150676 | 1252328 | aminoadipate aminotransferase      | Aadat | 29416  | 2,08 | up   |
| 6356821 | 7150676 | 1252334 | aminoadipate aminotransferase      | Aadat | 29416  | 1,44 | down |
| 6427350 | 7150676 | 1252331 | aminoadipate aminotransferase      | Aadat | 29416  | 1,21 | down |
| 6460549 | 7150676 | 1252335 | aminoadipate aminotransferase      | Aadat | 29416  | 1,54 | down |
| 6511326 | 7150676 | 1252327 | aminoadipate aminotransferase      | Aadat | 29416  | 1,65 | down |
| 6597855 | 7150676 | 1252332 | aminoadipate aminotransferase      | Aadat | 29416  | 1,38 | down |
| 6617754 | 7150676 | 1252330 | aminoadipate aminotransferase      | Aadat | 29416  | 1,35 | up   |
| 6669534 | 7150676 | 1252333 | aminoadipate aminotransferase      | Aadat | 29416  | 1,07 | up   |
| 5855780 | 7161420 | 1278768 | aminopeptidase O                   | Npepo | 290963 | 1,11 | down |
| 5905076 | 7161420 | 1278775 | aminopeptidase O                   | Npepo | 290963 | 1,51 | up   |



|         |         |         |                            |       |        |      |      |
|---------|---------|---------|----------------------------|-------|--------|------|------|
| 5958415 | 7161420 | 1278765 | aminopeptidase O           | Npepo | 290963 | 1,29 | up   |
| 5970611 | 7161420 | 1278770 | aminopeptidase O           | Npepo | 290963 | 2,09 | down |
| 5989668 | 7161420 | 1278763 | aminopeptidase O           | Npepo | 290963 | 1,09 | down |
| 5998568 | 7161420 | 1278771 | aminopeptidase O           | Npepo | 290963 | 1,19 | down |
| 6097074 | 7161420 | 1278762 | aminopeptidase O           | Npepo | 290963 | 1,06 | down |
| 6101755 | 7161420 | 1278761 | aminopeptidase O           | Npepo | 290963 | 1,01 | up   |
| 6263085 | 7161420 | 1278769 | aminopeptidase O           | Npepo | 290963 | 2,97 | down |
| 6326965 | 7161420 | 1278771 | aminopeptidase O           | Npepo | 290963 | 1,70 | down |
| 6330583 | 7161420 | 1278773 | aminopeptidase O           | Npepo | 290963 | 1,58 | up   |
| 6374811 | 7161420 | 1278774 | aminopeptidase O           | Npepo | 290963 | 2,11 | up   |
| 6419758 | 7161420 | 1278764 | aminopeptidase O           | Npepo | 290963 | 1,15 | down |
| 6478413 | 7161420 | 1278767 | aminopeptidase O           | Npepo | 290963 | 1,56 | up   |
| 6525738 | 7161420 | 1278766 | aminopeptidase O           | Npepo | 290963 | 1,64 | down |
| 6727945 | 7161420 | 1278772 | aminopeptidase O           | Npepo | 290963 | 1,78 | up   |
| 5655308 | 7326150 | 1686181 | amplified in osteosarcoma  | Os9   | 362891 | 1,06 | up   |
| 5685447 | 7326150 | 1686175 | amplified in osteosarcoma  | Os9   | 362891 | 1,07 | down |
| 5692720 | 7326150 | 1686190 | amplified in osteosarcoma  | Os9   | 362891 | 1,77 | up   |
| 5714833 | 7326150 | 1686186 | amplified in osteosarcoma  | Os9   | 362891 | 1,12 | up   |
| 5878245 | 7326150 | 1686177 | amplified in osteosarcoma  | Os9   | 362891 | 1,09 | up   |
| 5943132 | 7326150 | 1686189 | amplified in osteosarcoma  | Os9   | 362891 | 1,19 | up   |
| 6083460 | 7326150 | 1686179 | amplified in osteosarcoma  | Os9   | 362891 | 1,16 | up   |
| 6174270 | 7326150 | 1686188 | amplified in osteosarcoma  | Os9   | 362891 | 1,12 | down |
| 6190350 | 7326150 | 1686190 | amplified in osteosarcoma  | Os9   | 362891 | 1,18 | up   |
| 6215253 | 7326150 | 1686182 | amplified in osteosarcoma  | Os9   | 362891 | 1,08 | up   |
| 6221047 | 7326150 | 1686185 | amplified in osteosarcoma  | Os9   | 362891 | 1,20 | up   |
| 6263398 | 7326150 | 1686180 | amplified in osteosarcoma  | Os9   | 362891 | 1,04 | down |
| 6345589 | 7326150 | 1686183 | amplified in osteosarcoma  | Os9   | 362891 | 2,22 | down |
| 6356446 | 7326150 | 1686176 | amplified in osteosarcoma  | Os9   | 362891 | 1,16 | down |
| 6462513 | 7326150 | 1686187 | amplified in osteosarcoma  | Os9   | 362891 | 1,02 | down |
| 6548738 | 7326150 | 1686184 | amplified in osteosarcoma  | Os9   | 362891 | 1,09 | down |
| 6651423 | 7326150 | 1686178 | amplified in osteosarcoma  | Os9   | 362891 | 1,26 | down |
| 6739642 | 7326150 | 1686174 | amplified in osteosarcoma  | Os9   | 362891 | 1,11 | down |
| 5673857 | 7295410 | 1609788 | anaplastic lymphoma kinase | Alk   | 266802 | 1,46 | up   |
| 5742832 | 7295410 | 1609784 | anaplastic lymphoma kinase | Alk   | 266802 | 1,14 | up   |
| 5853674 | 7295410 | 1609785 | anaplastic lymphoma kinase | Alk   | 266802 | 1,14 | up   |
| 6195449 | 7295410 | 1609792 | anaplastic lymphoma kinase | Alk   | 266802 | 1,24 | down |
| 6207797 | 7295410 | 1609783 | anaplastic lymphoma kinase | Alk   | 266802 | 1,35 | down |
| 6305708 | 7295410 | 1609786 | anaplastic lymphoma kinase | Alk   | 266802 | 1,30 | up   |
| 6352175 | 7295410 | 1609791 | anaplastic lymphoma kinase | Alk   | 266802 | 1,07 | down |
| 6445412 | 7295410 | 1609790 | anaplastic lymphoma kinase | Alk   | 266802 | 1,20 | down |
| 6567240 | 7295410 | 1609789 | anaplastic lymphoma kinase | Alk   | 266802 | 1,99 | down |
| 6740816 | 7295410 | 1609787 | anaplastic lymphoma kinase | Alk   | 266802 | 1,41 | down |
| 5718781 | 7375811 | 1811060 | androgen receptor          | Ar    | 24208  | 1,02 | up   |
| 5742499 | 7375811 | 1811067 | androgen receptor          | Ar    | 24208  | 1,08 | up   |
| 5753985 | 7375811 | 1811062 | androgen receptor          | Ar    | 24208  | 1,74 | up   |
| 5808690 | 7375811 | 1811059 | androgen receptor          | Ar    | 24208  | 1,42 | up   |
| 6037410 | 7375811 | 1811061 | androgen receptor          | Ar    | 24208  | 1,28 | up   |
| 6061021 | 7375811 | 1811063 | androgen receptor          | Ar    | 24208  | 2,56 | up   |
| 6147117 | 7375811 | 1811066 | androgen receptor          | Ar    | 24208  | 1,58 | up   |
| 6218009 | 7375811 | 1811058 | androgen receptor          | Ar    | 24208  | 1,21 | down |
| 6227092 | 7375811 | 1811066 | androgen receptor          | Ar    | 24208  | 1,03 | up   |
| 6294346 | 7375811 | 1811058 | androgen receptor          | Ar    | 24208  | 1,02 | down |
| 6371040 | 7375811 | 1811058 | androgen receptor          | Ar    | 24208  | 1,44 | down |
| 6495610 | 7375811 | 1811058 | androgen receptor          | Ar    | 24208  | 1,45 | down |
| 6498272 | 7375811 | 1811059 | androgen receptor          | Ar    | 24208  | 2,15 | up   |
| 6626607 | 7375811 | 1811058 | androgen receptor          | Ar    | 24208  | 1,20 | down |

|         |         |         |                                                  |        |        |      |      |
|---------|---------|---------|--------------------------------------------------|--------|--------|------|------|
| 6661052 | 7375811 | 1811058 | androgen receptor                                | Ar     | 24208  | 1,03 | down |
| 6662346 | 7375811 | 1811058 | androgen receptor                                | Ar     | 24208  | 1,92 | down |
| 6683041 | 7375811 | 1811058 | androgen receptor                                | Ar     | 24208  | 1,26 | up   |
| 6694920 | 7375811 | 1811060 | androgen receptor                                | Ar     | 24208  | 1,35 | up   |
| 6697026 | 7375811 | 1811065 | androgen receptor                                | Ar     | 24208  | 1,54 | down |
| 6714256 | 7375811 | 1811064 | androgen receptor                                | Ar     | 24208  | 1,50 | up   |
| 5630968 | 7202550 | 1381619 | angiogenic factor with G patch and FHA domains 1 | Aggf1  | 310005 | 1,07 | up   |
| 6046924 | 7202550 | 1381619 | angiogenic factor with G patch and FHA domains 1 | Aggf1  | 310005 | 1,15 | down |
| 6270486 | 7202550 | 1381619 | angiogenic factor with G patch and FHA domains 1 | Aggf1  | 310005 | 1,15 | down |
| 6290955 | 7202550 | 1381617 | angiogenic factor with G patch and FHA domains 1 | Aggf1  | 310005 | 1,08 | down |
| 6362114 | 7202550 | 1381619 | angiogenic factor with G patch and FHA domains 1 | Aggf1  | 310005 | 1,57 | up   |
| 6590502 | 7202550 | 1381618 | angiogenic factor with G patch and FHA domains 1 | Aggf1  | 310005 | 1,37 | up   |
| 6716947 | 7202550 | 1381615 | angiogenic factor with G patch and FHA domains 1 | Aggf1  | 310005 | 1,16 | down |
| 6718153 | 7202550 | 1381616 | angiogenic factor with G patch and FHA domains 1 | Aggf1  | 310005 | 1,23 | down |
| 5703633 | 7342356 | 1725881 | angiomin-like 1                                  | Amotl1 | 315430 | 1,54 | down |
| 5736857 | 7342356 | 1725886 | angiomin-like 1                                  | Amotl1 | 315430 | 1,18 | down |
| 5989041 | 7342356 | 1725889 | angiomin-like 1                                  | Amotl1 | 315430 | 1,26 | up   |
| 6272484 | 7342356 | 1725876 | angiomin-like 1                                  | Amotl1 | 315430 | 1,72 | down |
| 6286881 | 7342356 | 1725878 | angiomin-like 1                                  | Amotl1 | 315430 | 1,45 | down |
| 6371475 | 7342356 | 1725877 | angiomin-like 1                                  | Amotl1 | 315430 | 1,15 | down |
| 6371901 | 7342356 | 1725905 | angiomin-like 1                                  | Amotl1 | 315430 | 1,51 | up   |
| 6404790 | 7342356 | 1725888 | angiomin-like 1                                  | Amotl1 | 315430 | 1,00 | down |
| 6409035 | 7342356 | 1725887 | angiomin-like 1                                  | Amotl1 | 315430 | 1,48 | up   |
| 6433675 | 7342356 | 1725879 | angiomin-like 1                                  | Amotl1 | 315430 | 1,15 | up   |
| 6437815 | 7342356 | 1725896 | angiomin-like 1                                  | Amotl1 | 315430 | 1,41 | up   |
| 6485303 | 7342356 | 1725884 | angiomin-like 1                                  | Amotl1 | 315430 | 1,59 | down |
| 6512439 | 7342356 | 1725883 | angiomin-like 1                                  | Amotl1 | 315430 | 1,58 | down |
| 6637978 | 7342356 | 1725902 | angiomin-like 1                                  | Amotl1 | 315430 | 1,11 | down |
| 6686661 | 7342356 | 1725885 | angiomin-like 1                                  | Amotl1 | 315430 | 1,05 | up   |
| 6725750 | 7343122 | 1727724 | anillin, actin binding protein                   | Anln   | 307056 | 1,18 | up   |
| 5640791 | 7213908 | 1407678 | ankyrin 2, neuronal                              | Ank2   | 362036 | 1,54 | up   |
| 5680006 | 7213908 | 1407701 | ankyrin 2, neuronal                              | Ank2   | 362036 | 1,88 | up   |
| 5680042 | 7213908 | 1407681 | ankyrin 2, neuronal                              | Ank2   | 362036 | 1,17 | up   |
| 5698364 | 7213908 | 1407652 | ankyrin 2, neuronal                              | Ank2   | 362036 | 1,15 | down |
| 5710244 | 7213908 | 1407683 | ankyrin 2, neuronal                              | Ank2   | 362036 | 1,01 | up   |
| 5719238 | 7213908 | 1407700 | ankyrin 2, neuronal                              | Ank2   | 362036 | 1,50 | down |
| 5733952 | 7213908 | 1407651 | ankyrin 2, neuronal                              | Ank2   | 362036 | 1,53 | down |
| 5946420 | 7213908 | 1407644 | ankyrin 2, neuronal                              | Ank2   | 362036 | 1,02 | up   |
| 6013086 | 7213908 | 1407637 | ankyrin 2, neuronal                              | Ank2   | 362036 | 1,08 | up   |
| 6039798 | 7213908 | 1407690 | ankyrin 2, neuronal                              | Ank2   | 362036 | 1,15 | down |
| 6044714 | 7213908 | 1407695 | ankyrin 2, neuronal                              | Ank2   | 362036 | 1,42 | up   |
| 6046354 | 7213908 | 1407710 | ankyrin 2, neuronal                              | Ank2   | 362036 | 1,01 | down |
| 6054185 | 7213908 | 1407641 | ankyrin 2, neuronal                              | Ank2   | 362036 | 1,14 | down |
| 6111006 | 7213908 | 1407699 | ankyrin 2, neuronal                              | Ank2   | 362036 | 1,03 | up   |
| 6115552 | 7213908 | 1407676 | ankyrin 2, neuronal                              | Ank2   | 362036 | 1,05 | up   |
| 6131392 | 7213908 | 1407750 | ankyrin 2, neuronal                              | Ank2   | 362036 | 1,60 | up   |
| 6143133 | 7213908 | 1407684 | ankyrin 2, neuronal                              | Ank2   | 362036 | 1,66 | up   |
| 6171201 | 7213908 | 1407643 | ankyrin 2, neuronal                              | Ank2   | 362036 | 1,32 | up   |
| 6201626 | 7213908 | 1407750 | ankyrin 2, neuronal                              | Ank2   | 362036 | 1,26 | up   |
| 6225029 | 7213908 | 1407712 | ankyrin 2, neuronal                              | Ank2   | 362036 | 1,46 | down |
| 6245099 | 7213908 | 1407651 | ankyrin 2, neuronal                              | Ank2   | 362036 | 1,53 | down |
| 6272224 | 7213908 | 1407675 | ankyrin 2, neuronal                              | Ank2   | 362036 | 1,29 | down |
| 6345247 | 7213908 | 1407703 | ankyrin 2, neuronal                              | Ank2   | 362036 | 1,14 | down |
| 6347385 | 7213908 | 1407685 | ankyrin 2, neuronal                              | Ank2   | 362036 | 1,64 | up   |
| 6387676 | 7213908 | 1407646 | ankyrin 2, neuronal                              | Ank2   | 362036 | 1,79 | up   |
| 6402477 | 7213908 | 1407638 | ankyrin 2, neuronal                              | Ank2   | 362036 | 1,14 | down |

|         |         |         |                                                             |        |        |      |      |
|---------|---------|---------|-------------------------------------------------------------|--------|--------|------|------|
| 6456222 | 7213908 | 1407700 | ankyrin 2, neuronal                                         | Ank2   | 362036 | 1,55 | up   |
| 6476341 | 7213908 | 1407696 | ankyrin 2, neuronal                                         | Ank2   | 362036 | 1,90 | up   |
| 6555567 | 7213908 | 1407690 | ankyrin 2, neuronal                                         | Ank2   | 362036 | 1,31 | up   |
| 6572945 | 7213908 | 1407717 | ankyrin 2, neuronal                                         | Ank2   | 362036 | 1,18 | up   |
| 6604780 | 7213908 | 1407651 | ankyrin 2, neuronal                                         | Ank2   | 362036 | 1,89 | down |
| 6699942 | 7213908 | 1407698 | ankyrin 2, neuronal                                         | Ank2   | 362036 | 1,18 | up   |
| 6725217 | 7213908 | 1407702 | ankyrin 2, neuronal                                         | Ank2   | 362036 | 1,36 | down |
| 5668412 | 7222244 | 1428264 | ankyrin 3, epithelial                                       | Ank3   | 361833 | 1,53 | down |
| 5681934 | 7222244 | 1428247 | ankyrin 3, epithelial                                       | Ank3   | 361833 | 1,29 | down |
| 5694005 | 7222244 | 1428276 | ankyrin 3, epithelial                                       | Ank3   | 361833 | 1,41 | up   |
| 5696645 | 7222244 | 1428279 | ankyrin 3, epithelial                                       | Ank3   | 361833 | 1,13 | up   |
| 5703125 | 7222244 | 1428250 | ankyrin 3, epithelial                                       | Ank3   | 361833 | 1,61 | down |
| 5734430 | 7222244 | 1428246 | ankyrin 3, epithelial                                       | Ank3   | 361833 | 1,34 | down |
| 5750870 | 7222244 | 1428258 | ankyrin 3, epithelial                                       | Ank3   | 361833 | 1,16 | up   |
| 5752795 | 7222244 | 1428265 | ankyrin 3, epithelial                                       | Ank3   | 361833 | 1,24 | up   |
| 5771647 | 7222244 | 1428280 | ankyrin 3, epithelial                                       | Ank3   | 361833 | 1,15 | down |
| 5776578 | 7222244 | 1428248 | ankyrin 3, epithelial                                       | Ank3   | 361833 | 1,95 | down |
| 5837764 | 7222244 | 1428275 | ankyrin 3, epithelial                                       | Ank3   | 361833 | 1,04 | down |
| 5886752 | 7222244 | 1428268 | ankyrin 3, epithelial                                       | Ank3   | 361833 | 1,22 | down |
| 5897436 | 7222244 | 1428253 | ankyrin 3, epithelial                                       | Ank3   | 361833 | 1,14 | down |
| 5899013 | 7222244 | 1428277 | ankyrin 3, epithelial                                       | Ank3   | 361833 | 1,13 | up   |
| 5908972 | 7222244 | 1428245 | ankyrin 3, epithelial                                       | Ank3   | 361833 | 1,04 | up   |
| 5918122 | 7222244 | 1428261 | ankyrin 3, epithelial                                       | Ank3   | 361833 | 1,20 | down |
| 5923547 | 7222244 | 1428269 | ankyrin 3, epithelial                                       | Ank3   | 361833 | 1,25 | down |
| 5991215 | 7222244 | 1428256 | ankyrin 3, epithelial                                       | Ank3   | 361833 | 1,01 | down |
| 6043101 | 7222244 | 1428255 | ankyrin 3, epithelial                                       | Ank3   | 361833 | 1,51 | up   |
| 6063066 | 7222244 | 1428285 | ankyrin 3, epithelial                                       | Ank3   | 361833 | 2,06 | up   |
| 6085958 | 7222244 | 1428278 | ankyrin 3, epithelial                                       | Ank3   | 361833 | 1,34 | down |
| 6104937 | 7222244 | 1428263 | ankyrin 3, epithelial                                       | Ank3   | 361833 | 1,14 | up   |
| 6119681 | 7222244 | 1428271 | ankyrin 3, epithelial                                       | Ank3   | 361833 | 1,27 | down |
| 6122269 | 7222244 | 1428248 | ankyrin 3, epithelial                                       | Ank3   | 361833 | 1,16 | down |
| 6158986 | 7222244 | 1428266 | ankyrin 3, epithelial                                       | Ank3   | 361833 | 1,02 | down |
| 6175208 | 7222244 | 1428251 | ankyrin 3, epithelial                                       | Ank3   | 361833 | 1,33 | up   |
| 6221220 | 7222244 | 1428259 | ankyrin 3, epithelial                                       | Ank3   | 361833 | 1,19 | up   |
| 6224888 | 7222244 | 1428262 | ankyrin 3, epithelial                                       | Ank3   | 361833 | 1,71 | up   |
| 6355809 | 7222244 | 1428257 | ankyrin 3, epithelial                                       | Ank3   | 361833 | 1,03 | down |
| 6431249 | 7222244 | 1428254 | ankyrin 3, epithelial                                       | Ank3   | 361833 | 1,04 | down |
| 6448914 | 7222244 | 1428261 | ankyrin 3, epithelial                                       | Ank3   | 361833 | 1,09 | down |
| 6478665 | 7222244 | 1428250 | ankyrin 3, epithelial                                       | Ank3   | 361833 | 1,56 | up   |
| 6515175 | 7222244 | 1428260 | ankyrin 3, epithelial                                       | Ank3   | 361833 | 1,17 | up   |
| 6537256 | 7222244 | 1428249 | ankyrin 3, epithelial                                       | Ank3   | 361833 | 1,47 | up   |
| 6581575 | 7222244 | 1428282 | ankyrin 3, epithelial                                       | Ank3   | 361833 | 1,01 | up   |
| 6584605 | 7222244 | 1428275 | ankyrin 3, epithelial                                       | Ank3   | 361833 | 1,01 | up   |
| 6594851 | 7222244 | 1428270 | ankyrin 3, epithelial                                       | Ank3   | 361833 | 1,06 | down |
| 6598929 | 7222244 | 1428252 | ankyrin 3, epithelial                                       | Ank3   | 361833 | 1,43 | down |
| 6607745 | 7222244 | 1428273 | ankyrin 3, epithelial                                       | Ank3   | 361833 | 1,06 | down |
| 6615855 | 7222244 | 1428272 | ankyrin 3, epithelial                                       | Ank3   | 361833 | 1,28 | up   |
| 6630887 | 7222244 | 1428244 | ankyrin 3, epithelial                                       | Ank3   | 361833 | 1,60 | down |
| 6638526 | 7222244 | 1428267 | ankyrin 3, epithelial                                       | Ank3   | 361833 | 1,08 | down |
| 6672486 | 7222244 | 1428274 | ankyrin 3, epithelial                                       | Ank3   | 361833 | 1,12 | up   |
| 6676452 | 7222244 | 1428281 | ankyrin 3, epithelial                                       | Ank3   | 361833 | 1,12 | down |
| 6680545 | 7222244 | 1428284 | ankyrin 3, epithelial                                       | Ank3   | 361833 | 1,40 | up   |
| 6718359 | 7222244 | 1428283 | ankyrin 3, epithelial                                       | Ank3   | 361833 | 1,04 | down |
| 5682698 | 7217143 | 1415587 | ankyrin repeat and sterile alpha motif domain containing 1A | Anks1a | 309639 | 1,09 | up   |
| 5689048 | 7217143 | 1415608 | ankyrin repeat and sterile alpha motif domain containing 1A | Anks1a | 309639 | 1,18 | up   |
| 5728347 | 7217143 | 1415580 | ankyrin repeat and sterile alpha motif domain containing 1A | Anks1a | 309639 | 1,39 | up   |

|         |         |         |                                                             |         |        |      |      |
|---------|---------|---------|-------------------------------------------------------------|---------|--------|------|------|
| 5756526 | 7217143 | 1415618 | ankyrin repeat and sterile alpha motif domain containing 1A | Anks1a  | 309639 | 1,38 | down |
| 5805682 | 7217143 | 1415609 | ankyrin repeat and sterile alpha motif domain containing 1A | Anks1a  | 309639 | 1,15 | up   |
| 5807230 | 7217143 | 1415592 | ankyrin repeat and sterile alpha motif domain containing 1A | Anks1a  | 309639 | 1,11 | up   |
| 5814472 | 7217143 | 1415616 | ankyrin repeat and sterile alpha motif domain containing 1A | Anks1a  | 309639 | 1,07 | up   |
| 5815653 | 7217143 | 1415613 | ankyrin repeat and sterile alpha motif domain containing 1A | Anks1a  | 309639 | 1,03 | up   |
| 5931983 | 7217143 | 1415590 | ankyrin repeat and sterile alpha motif domain containing 1A | Anks1a  | 309639 | 1,06 | down |
| 6039916 | 7217143 | 1415593 | ankyrin repeat and sterile alpha motif domain containing 1A | Anks1a  | 309639 | 1,19 | up   |
| 6045481 | 7217143 | 1415583 | ankyrin repeat and sterile alpha motif domain containing 1A | Anks1a  | 309639 | 1,11 | up   |
| 6051124 | 7217143 | 1415614 | ankyrin repeat and sterile alpha motif domain containing 1A | Anks1a  | 309639 | 1,01 | down |
| 6063732 | 7217143 | 1415619 | ankyrin repeat and sterile alpha motif domain containing 1A | Anks1a  | 309639 | 1,15 | down |
| 6157513 | 7217143 | 1415589 | ankyrin repeat and sterile alpha motif domain containing 1A | Anks1a  | 309639 | 1,12 | up   |
| 6201435 | 7217143 | 1415596 | ankyrin repeat and sterile alpha motif domain containing 1A | Anks1a  | 309639 | 1,20 | down |
| 6225577 | 7217143 | 1415606 | ankyrin repeat and sterile alpha motif domain containing 1A | Anks1a  | 309639 | 1,02 | down |
| 6241507 | 7217143 | 1415588 | ankyrin repeat and sterile alpha motif domain containing 1A | Anks1a  | 309639 | 1,01 | up   |
| 6293274 | 7217143 | 1415612 | ankyrin repeat and sterile alpha motif domain containing 1A | Anks1a  | 309639 | 1,20 | up   |
| 6356084 | 7217143 | 1415610 | ankyrin repeat and sterile alpha motif domain containing 1A | Anks1a  | 309639 | 1,16 | up   |
| 6404225 | 7217143 | 1415611 | ankyrin repeat and sterile alpha motif domain containing 1A | Anks1a  | 309639 | 1,23 | down |
| 6425731 | 7217143 | 1415591 | ankyrin repeat and sterile alpha motif domain containing 1A | Anks1a  | 309639 | 1,05 | up   |
| 6497219 | 7217143 | 1415596 | ankyrin repeat and sterile alpha motif domain containing 1A | Anks1a  | 309639 | 1,06 | down |
| 6543186 | 7217143 | 1415615 | ankyrin repeat and sterile alpha motif domain containing 1A | Anks1a  | 309639 | 1,20 | down |
| 6663138 | 7217143 | 1415584 | ankyrin repeat and sterile alpha motif domain containing 1A | Anks1a  | 309639 | 1,35 | up   |
| 6692801 | 7217143 | 1415618 | ankyrin repeat and sterile alpha motif domain containing 1A | Anks1a  | 309639 | 1,58 | down |
| 6738734 | 7217143 | 1415603 | ankyrin repeat and sterile alpha motif domain containing 1A | Anks1a  | 309639 | 1,30 | down |
| 5633794 | 7117158 | 1170024 | ankyrin repeat domain 17                                    | Ankrd17 | 289521 | 1,35 | up   |
| 5654263 | 7117158 | 1170012 | ankyrin repeat domain 17                                    | Ankrd17 | 289521 | 1,14 | up   |
| 5662228 | 7117158 | 1170002 | ankyrin repeat domain 17                                    | Ankrd17 | 289521 | 1,29 | up   |
| 5751898 | 7117158 | 1170016 | ankyrin repeat domain 17                                    | Ankrd17 | 289521 | 1,30 | up   |
| 5758003 | 7117158 | 1170029 | ankyrin repeat domain 17                                    | Ankrd17 | 289521 | 1,23 | down |
| 5769582 | 7117158 | 1170004 | ankyrin repeat domain 17                                    | Ankrd17 | 289521 | 1,22 | up   |
| 5776656 | 7117158 | 1170009 | ankyrin repeat domain 17                                    | Ankrd17 | 289521 | 1,01 | down |
| 5782867 | 7117158 | 1170040 | ankyrin repeat domain 17                                    | Ankrd17 | 289521 | 1,27 | down |
| 5793039 | 7117158 | 1170028 | ankyrin repeat domain 17                                    | Ankrd17 | 289521 | 1,09 | down |
| 5801358 | 7117158 | 1170013 | ankyrin repeat domain 17                                    | Ankrd17 | 289521 | 1,11 | up   |
| 5843036 | 7117158 | 1170015 | ankyrin repeat domain 17                                    | Ankrd17 | 289521 | 1,14 | up   |
| 5870297 | 7117158 | 1170017 | ankyrin repeat domain 17                                    | Ankrd17 | 289521 | 1,06 | down |
| 5870393 | 7117158 | 1170001 | ankyrin repeat domain 17                                    | Ankrd17 | 289521 | 1,22 | down |
| 5914416 | 7117158 | 1170023 | ankyrin repeat domain 17                                    | Ankrd17 | 289521 | 1,13 | down |
| 5950797 | 7117158 | 1170041 | ankyrin repeat domain 17                                    | Ankrd17 | 289521 | 1,06 | up   |
| 5968055 | 7117158 | 1170022 | ankyrin repeat domain 17                                    | Ankrd17 | 289521 | 1,42 | down |
| 6009389 | 7117158 | 1170040 | ankyrin repeat domain 17                                    | Ankrd17 | 289521 | 1,17 | down |
| 6047178 | 7117158 | 1170007 | ankyrin repeat domain 17                                    | Ankrd17 | 289521 | 1,27 | up   |
| 6099697 | 7117158 | 1170030 | ankyrin repeat domain 17                                    | Ankrd17 | 289521 | 1,08 | up   |
| 6124107 | 7117158 | 1170018 | ankyrin repeat domain 17                                    | Ankrd17 | 289521 | 1,12 | up   |
| 6129079 | 7117158 | 1170014 | ankyrin repeat domain 17                                    | Ankrd17 | 289521 | 1,15 | up   |
| 6134279 | 7117158 | 1170031 | ankyrin repeat domain 17                                    | Ankrd17 | 289521 | 1,09 | down |
| 6142776 | 7117158 | 1170010 | ankyrin repeat domain 17                                    | Ankrd17 | 289521 | 1,05 | up   |
| 6154121 | 7117158 | 1170028 | ankyrin repeat domain 17                                    | Ankrd17 | 289521 | 1,73 | down |
| 6168826 | 7117158 | 1170029 | ankyrin repeat domain 17                                    | Ankrd17 | 289521 | 1,91 | down |
| 6184201 | 7117158 | 1170016 | ankyrin repeat domain 17                                    | Ankrd17 | 289521 | 1,15 | down |
| 6185610 | 7117158 | 1169997 | ankyrin repeat domain 17                                    | Ankrd17 | 289521 | 1,07 | down |
| 6198208 | 7117158 | 1170030 | ankyrin repeat domain 17                                    | Ankrd17 | 289521 | 1,54 | down |
| 6208919 | 7117158 | 1170039 | ankyrin repeat domain 17                                    | Ankrd17 | 289521 | 1,13 | down |
| 6209974 | 7117158 | 1170033 | ankyrin repeat domain 17                                    | Ankrd17 | 289521 | 1,09 | up   |
| 6248716 | 7117158 | 1170015 | ankyrin repeat domain 17                                    | Ankrd17 | 289521 | 1,59 | up   |
| 6270838 | 7117158 | 1170015 | ankyrin repeat domain 17                                    | Ankrd17 | 289521 | 1,33 | up   |
| 6380593 | 7117158 | 1170025 | ankyrin repeat domain 17                                    | Ankrd17 | 289521 | 1,13 | up   |

|         |         |         |                          |         |        |      |      |
|---------|---------|---------|--------------------------|---------|--------|------|------|
| 6415510 | 7117158 | 1170008 | ankyrin repeat domain 17 | Ankrd17 | 289521 | 1,37 | up   |
| 6474529 | 7117158 | 1170026 | ankyrin repeat domain 17 | Ankrd17 | 289521 | 1,19 | down |
| 6477690 | 7117158 | 1170039 | ankyrin repeat domain 17 | Ankrd17 | 289521 | 1,22 | up   |
| 6512584 | 7117158 | 1170011 | ankyrin repeat domain 17 | Ankrd17 | 289521 | 1,05 | down |
| 6546010 | 7117158 | 1170003 | ankyrin repeat domain 17 | Ankrd17 | 289521 | 1,05 | down |
| 6557561 | 7117158 | 1170005 | ankyrin repeat domain 17 | Ankrd17 | 289521 | 1,02 | up   |
| 6593579 | 7117158 | 1170043 | ankyrin repeat domain 17 | Ankrd17 | 289521 | 1,39 | down |
| 6637270 | 7117158 | 1170008 | ankyrin repeat domain 17 | Ankrd17 | 289521 | 1,09 | up   |
| 6643833 | 7117158 | 1170023 | ankyrin repeat domain 17 | Ankrd17 | 289521 | 1,08 | up   |
| 6662163 | 7117158 | 1170015 | ankyrin repeat domain 17 | Ankrd17 | 289521 | 1,58 | up   |
| 6679916 | 7117158 | 1169997 | ankyrin repeat domain 17 | Ankrd17 | 289521 | 2,00 | up   |
| 6716106 | 7117158 | 1170030 | ankyrin repeat domain 17 | Ankrd17 | 289521 | 1,42 | down |
| 5767003 | 7361073 | 1772314 | ankyrin repeat domain 23 | Ankrd23 | 316330 | 1,21 | down |
| 5777685 | 7361073 | 1772314 | ankyrin repeat domain 23 | Ankrd23 | 316330 | 1,10 | up   |
| 5782601 | 7361073 | 1772320 | ankyrin repeat domain 23 | Ankrd23 | 316330 | 1,25 | down |
| 5961264 | 7361073 | 1772323 | ankyrin repeat domain 23 | Ankrd23 | 316330 | 1,02 | down |
| 6054508 | 7361073 | 1772314 | ankyrin repeat domain 23 | Ankrd23 | 316330 | 1,27 | up   |
| 6186746 | 7361073 | 1772315 | ankyrin repeat domain 23 | Ankrd23 | 316330 | 1,24 | up   |
| 6228672 | 7361073 | 1772316 | ankyrin repeat domain 23 | Ankrd23 | 316330 | 1,18 | down |
| 6469791 | 7361073 | 1772317 | ankyrin repeat domain 23 | Ankrd23 | 316330 | 1,05 | up   |
| 6489170 | 7361073 | 1772321 | ankyrin repeat domain 23 | Ankrd23 | 316330 | 1,35 | up   |
| 6515741 | 7361073 | 1772319 | ankyrin repeat domain 23 | Ankrd23 | 316330 | 1,11 | up   |
| 6578801 | 7361073 | 1772318 | ankyrin repeat domain 23 | Ankrd23 | 316330 | 1,03 | down |
| 6639389 | 7361073 | 1772322 | ankyrin repeat domain 23 | Ankrd23 | 316330 | 1,04 | down |
| 5764614 | 7361073 | 1772324 | ankyrin repeat domain 39 | Ankrd39 | 367251 | 1,03 | down |
| 6140737 | 7361073 | 1772326 | ankyrin repeat domain 39 | Ankrd39 | 367251 | 1,02 | up   |
| 6279428 | 7361073 | 1772329 | ankyrin repeat domain 39 | Ankrd39 | 367251 | 1,33 | down |
| 6368089 | 7361073 | 1772324 | ankyrin repeat domain 39 | Ankrd39 | 367251 | 1,24 | down |
| 6595054 | 7361073 | 1772327 | ankyrin repeat domain 39 | Ankrd39 | 367251 | 2,34 | down |
| 5636259 | 7233012 | 1455412 | ankyrin repeat domain 5  | Ankrd5  | 296184 | 1,34 | down |
| 5915745 | 7233012 | 1455424 | ankyrin repeat domain 5  | Ankrd5  | 296184 | 1,02 | up   |
| 5921213 | 7233012 | 1455415 | ankyrin repeat domain 5  | Ankrd5  | 296184 | 1,19 | down |
| 6019398 | 7233012 | 1455418 | ankyrin repeat domain 5  | Ankrd5  | 296184 | 1,08 | down |
| 6203561 | 7233012 | 1455421 | ankyrin repeat domain 5  | Ankrd5  | 296184 | 1,06 | up   |
| 6342921 | 7233012 | 1455422 | ankyrin repeat domain 5  | Ankrd5  | 296184 | 1,07 | down |
| 6354534 | 7233012 | 1455414 | ankyrin repeat domain 5  | Ankrd5  | 296184 | 1,08 | down |
| 6399097 | 7233012 | 1455417 | ankyrin repeat domain 5  | Ankrd5  | 296184 | 1,01 | down |
| 6510939 | 7233012 | 1455419 | ankyrin repeat domain 5  | Ankrd5  | 296184 | 1,13 | down |
| 6590441 | 7233012 | 1455416 | ankyrin repeat domain 5  | Ankrd5  | 296184 | 1,27 | down |
| 6644799 | 7233012 | 1455425 | ankyrin repeat domain 5  | Ankrd5  | 296184 | 2,08 | down |
| 6663608 | 7233012 | 1455420 | ankyrin repeat domain 5  | Ankrd5  | 296184 | 1,15 | down |
| 6667093 | 7233012 | 1455423 | ankyrin repeat domain 5  | Ankrd5  | 296184 | 1,16 | up   |
| 5753766 | 7370009 | 1795812 | ankyrin repeat domain 57 | Ankrd57 | 503306 | 1,34 | up   |
| 5949472 | 7370009 | 1795812 | ankyrin repeat domain 57 | Ankrd57 | 503306 | 1,41 | up   |
| 6116451 | 7370009 | 1795811 | ankyrin repeat domain 57 | Ankrd57 | 503306 | 1,36 | down |
| 6123807 | 7370009 | 1795812 | ankyrin repeat domain 57 | Ankrd57 | 503306 | 1,05 | down |
| 6258250 | 7370009 | 1795812 | ankyrin repeat domain 57 | Ankrd57 | 503306 | 1,06 | down |
| 6443236 | 7370009 | 1795812 | ankyrin repeat domain 57 | Ankrd57 | 503306 | 2,32 | down |
| 6540539 | 7370009 | 1795812 | ankyrin repeat domain 57 | Ankrd57 | 503306 | 1,13 | up   |
| 6700730 | 7370009 | 1795812 | ankyrin repeat domain 57 | Ankrd57 | 503306 | 1,21 | up   |
| 5692398 | 7323560 | 1680020 | anoctamin 4              | Ano4    | 299714 | 1,08 | down |
| 5698243 | 7323560 | 1680060 | anoctamin 4              | Ano4    | 299714 | 1,23 | up   |
| 5723500 | 7323560 | 1680041 | anoctamin 4              | Ano4    | 299714 | 1,13 | up   |
| 5786953 | 7323560 | 1680007 | anoctamin 4              | Ano4    | 299714 | 1,20 | down |
| 5811865 | 7323560 | 1680008 | anoctamin 4              | Ano4    | 299714 | 1,00 | up   |
| 5819301 | 7323560 | 1680081 | anoctamin 4              | Ano4    | 299714 | 1,31 | down |

|         |         |         |                                              |         |        |      |      |
|---------|---------|---------|----------------------------------------------|---------|--------|------|------|
| 5879009 | 7323560 | 1680013 | anoctamin 4                                  | Ano4    | 299714 | 1,19 | up   |
| 5906826 | 7323560 | 1680013 | anoctamin 4                                  | Ano4    | 299714 | 1,02 | down |
| 5931963 | 7323560 | 1680008 | anoctamin 4                                  | Ano4    | 299714 | 1,09 | up   |
| 6013014 | 7323560 | 1680010 | anoctamin 4                                  | Ano4    | 299714 | 1,25 | down |
| 6014539 | 7323560 | 1680011 | anoctamin 4                                  | Ano4    | 299714 | 1,11 | up   |
| 6104867 | 7323560 | 1680017 | anoctamin 4                                  | Ano4    | 299714 | 1,17 | down |
| 6107068 | 7323560 | 1680038 | anoctamin 4                                  | Ano4    | 299714 | 1,05 | down |
| 6286212 | 7323560 | 1680012 | anoctamin 4                                  | Ano4    | 299714 | 1,55 | down |
| 6363996 | 7323560 | 1680025 | anoctamin 4                                  | Ano4    | 299714 | 1,88 | up   |
| 6412952 | 7323560 | 1680022 | anoctamin 4                                  | Ano4    | 299714 | 1,15 | down |
| 6429436 | 7323560 | 1680081 | anoctamin 4                                  | Ano4    | 299714 | 1,08 | down |
| 6455680 | 7323560 | 1680028 | anoctamin 4                                  | Ano4    | 299714 | 1,00 | up   |
| 6485523 | 7323560 | 1680055 | anoctamin 4                                  | Ano4    | 299714 | 1,25 | down |
| 6547788 | 7323560 | 1680060 | anoctamin 4                                  | Ano4    | 299714 | 1,00 | up   |
| 6551788 | 7323560 | 1680018 | anoctamin 4                                  | Ano4    | 299714 | 1,63 | up   |
| 6554540 | 7323560 | 1680045 | anoctamin 4                                  | Ano4    | 299714 | 1,00 | up   |
| 6561286 | 7323560 | 1680066 | anoctamin 4                                  | Ano4    | 299714 | 1,63 | up   |
| 6580323 | 7323560 | 1680014 | anoctamin 4                                  | Ano4    | 299714 | 1,15 | up   |
| 6589455 | 7323560 | 1680033 | anoctamin 4                                  | Ano4    | 299714 | 1,83 | down |
| 6627351 | 7323560 | 1680034 | anoctamin 4                                  | Ano4    | 299714 | 1,03 | down |
| 6628328 | 7323560 | 1680044 | anoctamin 4                                  | Ano4    | 299714 | 2,01 | up   |
| 6721177 | 7323560 | 1680057 | anoctamin 4                                  | Ano4    | 299714 | 1,01 | down |
| 6743123 | 7323560 | 1680030 | anoctamin 4                                  | Ano4    | 299714 | 1,03 | up   |
| 5768917 | 7297421 | 1615072 | anterior gradient homolog 2 (Xenopus laevis) | Agr2    | 298961 | 1,38 | up   |
| 5818299 | 7297421 | 1615074 | anterior gradient homolog 2 (Xenopus laevis) | Agr2    | 298961 | 1,86 | down |
| 5901218 | 7297421 | 1615068 | anterior gradient homolog 2 (Xenopus laevis) | Agr2    | 298961 | 1,85 | down |
| 5901539 | 7297421 | 1615069 | anterior gradient homolog 2 (Xenopus laevis) | Agr2    | 298961 | 1,14 | down |
| 5973128 | 7297421 | 1615073 | anterior gradient homolog 2 (Xenopus laevis) | Agr2    | 298961 | 2,06 | down |
| 6540084 | 7297421 | 1615070 | anterior gradient homolog 2 (Xenopus laevis) | Agr2    | 298961 | 1,41 | up   |
| 6603532 | 7297421 | 1615071 | anterior gradient homolog 2 (Xenopus laevis) | Agr2    | 298961 | 1,08 | up   |
| 5987549 | 7070546 | 1057564 | AP1 gamma subunit binding protein 1          | Ap1gbp1 | 84479  | 1,08 | up   |
| 6305979 | 7070546 | 1057565 | AP1 gamma subunit binding protein 1          | Ap1gbp1 | 84479  | 1,17 | up   |
| 6437459 | 7070546 | 1057566 | AP1 gamma subunit binding protein 1          | Ap1gbp1 | 84479  | 1,15 | up   |
| 6566773 | 7070546 | 1057565 | AP1 gamma subunit binding protein 1          | Ap1gbp1 | 84479  | 1,12 | up   |
| 6618312 | 7070546 | 1057563 | AP1 gamma subunit binding protein 1          | Ap1gbp1 | 84479  | 1,31 | down |
| 6746837 | 7070546 | 1057565 | AP1 gamma subunit binding protein 1          | Ap1gbp1 | 84479  | 2,12 | down |
| 5805182 | 7041273 | 988584  | APOBEC1 complementation factor               | A1cf    | 170912 | 1,07 | up   |
| 5812894 | 7041273 | 988591  | APOBEC1 complementation factor               | A1cf    | 170912 | 1,20 | up   |
| 5864713 | 7041273 | 988591  | APOBEC1 complementation factor               | A1cf    | 170912 | 2,10 | down |
| 5925630 | 7041273 | 988590  | APOBEC1 complementation factor               | A1cf    | 170912 | 2,45 | up   |
| 5946507 | 7041273 | 988583  | APOBEC1 complementation factor               | A1cf    | 170912 | 1,10 | down |
| 5973076 | 7041273 | 988590  | APOBEC1 complementation factor               | A1cf    | 170912 | 2,66 | up   |
| 6077509 | 7041273 | 988589  | APOBEC1 complementation factor               | A1cf    | 170912 | 1,22 | down |
| 6207722 | 7041273 | 988588  | APOBEC1 complementation factor               | A1cf    | 170912 | 1,03 | up   |
| 6211095 | 7041273 | 988587  | APOBEC1 complementation factor               | A1cf    | 170912 | 1,10 | down |
| 6220349 | 7041273 | 988585  | APOBEC1 complementation factor               | A1cf    | 170912 | 1,26 | down |
| 6324145 | 7041273 | 988583  | APOBEC1 complementation factor               | A1cf    | 170912 | 1,31 | down |
| 6422934 | 7041273 | 988590  | APOBEC1 complementation factor               | A1cf    | 170912 | 2,07 | up   |
| 6537212 | 7041273 | 988592  | APOBEC1 complementation factor               | A1cf    | 170912 | 1,48 | down |
| 6564583 | 7041273 | 988586  | APOBEC1 complementation factor               | A1cf    | 170912 | 1,09 | up   |
| 5716006 | 7210599 | 1400513 | apolipoprotein A-I binding protein           | Apoa1bp | 295229 | 1,13 | down |
| 5861055 | 7210599 | 1400514 | apolipoprotein A-I binding protein           | Apoa1bp | 295229 | 1,32 | down |
| 5870893 | 7210599 | 1400510 | apolipoprotein A-I binding protein           | Apoa1bp | 295229 | 1,27 | up   |
| 5916351 | 7210599 | 1400512 | apolipoprotein A-I binding protein           | Apoa1bp | 295229 | 1,14 | down |
| 5965495 | 7210599 | 1400514 | apolipoprotein A-I binding protein           | Apoa1bp | 295229 | 1,03 | down |
| 5968691 | 7210599 | 1400514 | apolipoprotein A-I binding protein           | Apoa1bp | 295229 | 1,01 | down |

|         |         |         |                                             |         |        |      |      |
|---------|---------|---------|---------------------------------------------|---------|--------|------|------|
| 6015590 | 7210599 | 1400511 | apolipoprotein A-I binding protein          | Apoa1bp | 295229 | 1,07 | down |
| 6168952 | 7210599 | 1400513 | apolipoprotein A-I binding protein          | Apoa1bp | 295229 | 1,27 | up   |
| 6437901 | 7210599 | 1400514 | apolipoprotein A-I binding protein          | Apoa1bp | 295229 | 1,21 | up   |
| 6729417 | 7210599 | 1400510 | apolipoprotein A-I binding protein          | Apoa1bp | 295229 | 2,28 | down |
| 5721265 | 7329479 | 1694174 | apolipoprotein L 9a                         | Apol9a  | 503164 | 1,01 | down |
| 5866712 | 7329479 | 1694176 | apolipoprotein L 9a                         | Apol9a  | 503164 | 1,66 | down |
| 5881446 | 7329479 | 1694173 | apolipoprotein L 9a                         | Apol9a  | 503164 | 1,58 | down |
| 6030293 | 7329479 | 1694175 | apolipoprotein L 9a                         | Apol9a  | 503164 | 1,05 | down |
| 6534289 | 7329479 | 1694177 | apolipoprotein L 9a                         | Apol9a  | 503164 | 2,35 | up   |
| 5627579 | 7080812 | 1081165 | apoptosis antagonizing transcription factor | Aatf    | 114512 | 2,17 | up   |
| 5647405 | 7080812 | 1081168 | apoptosis antagonizing transcription factor | Aatf    | 114512 | 1,15 | down |
| 5700060 | 7080812 | 1081161 | apoptosis antagonizing transcription factor | Aatf    | 114512 | 1,01 | up   |
| 5762639 | 7080812 | 1081158 | apoptosis antagonizing transcription factor | Aatf    | 114512 | 1,07 | up   |
| 5987736 | 7080812 | 1081156 | apoptosis antagonizing transcription factor | Aatf    | 114512 | 1,33 | down |
| 6001096 | 7080812 | 1081168 | apoptosis antagonizing transcription factor | Aatf    | 114512 | 1,25 | up   |
| 6033903 | 7080812 | 1081163 | apoptosis antagonizing transcription factor | Aatf    | 114512 | 1,10 | up   |
| 6034882 | 7080812 | 1081160 | apoptosis antagonizing transcription factor | Aatf    | 114512 | 1,22 | down |
| 6050944 | 7080812 | 1081168 | apoptosis antagonizing transcription factor | Aatf    | 114512 | 1,32 | down |
| 6106149 | 7080812 | 1081156 | apoptosis antagonizing transcription factor | Aatf    | 114512 | 1,26 | down |
| 6211379 | 7080812 | 1081159 | apoptosis antagonizing transcription factor | Aatf    | 114512 | 1,17 | down |
| 6245097 | 7080812 | 1081167 | apoptosis antagonizing transcription factor | Aatf    | 114512 | 1,01 | down |
| 6256022 | 7080812 | 1081157 | apoptosis antagonizing transcription factor | Aatf    | 114512 | 1,66 | up   |
| 6261284 | 7080812 | 1081164 | apoptosis antagonizing transcription factor | Aatf    | 114512 | 1,33 | up   |
| 6324752 | 7080812 | 1081166 | apoptosis antagonizing transcription factor | Aatf    | 114512 | 1,31 | up   |
| 6415395 | 7080812 | 1081162 | apoptosis antagonizing transcription factor | Aatf    | 114512 | 1,32 | up   |
| 6573631 | 7080812 | 1081168 | apoptosis antagonizing transcription factor | Aatf    | 114512 | 1,39 | down |
| 6051118 | 7084993 | 1090664 | apoptosis-associated tyrosine kinase        | Aatk    | 690853 | 1,50 | down |
| 6382977 | 7084993 | 1090665 | apoptosis-associated tyrosine kinase        | Aatk    | 690853 | 1,06 | up   |
| 6565344 | 7084993 | 1090666 | apoptosis-associated tyrosine kinase        | Aatk    | 690853 | 1,29 | down |
| 5617759 | 7323725 | 1680456 | apoptotic peptidase activating factor 1     | Apaf1   | 78963  | 1,21 | down |
| 5657024 | 7323725 | 1680451 | apoptotic peptidase activating factor 1     | Apaf1   | 78963  | 1,01 | up   |
| 5657236 | 7323725 | 1680467 | apoptotic peptidase activating factor 1     | Apaf1   | 78963  | 1,27 | down |
| 5713477 | 7323725 | 1680449 | apoptotic peptidase activating factor 1     | Apaf1   | 78963  | 1,32 | up   |
| 5763728 | 7323725 | 1680463 | apoptotic peptidase activating factor 1     | Apaf1   | 78963  | 2,72 | down |
| 5778162 | 7323725 | 1680467 | apoptotic peptidase activating factor 1     | Apaf1   | 78963  | 1,89 | down |
| 5823977 | 7323725 | 1680450 | apoptotic peptidase activating factor 1     | Apaf1   | 78963  | 1,54 | up   |
| 5831704 | 7323725 | 1680459 | apoptotic peptidase activating factor 1     | Apaf1   | 78963  | 1,04 | down |
| 5838404 | 7323725 | 1680458 | apoptotic peptidase activating factor 1     | Apaf1   | 78963  | 1,21 | up   |
| 5885574 | 7323725 | 1680464 | apoptotic peptidase activating factor 1     | Apaf1   | 78963  | 1,14 | down |
| 5992340 | 7323725 | 1680455 | apoptotic peptidase activating factor 1     | Apaf1   | 78963  | 1,07 | down |
| 6015782 | 7323725 | 1680460 | apoptotic peptidase activating factor 1     | Apaf1   | 78963  | 1,60 | up   |
| 6030794 | 7323725 | 1680457 | apoptotic peptidase activating factor 1     | Apaf1   | 78963  | 1,12 | up   |
| 6127302 | 7323725 | 1680456 | apoptotic peptidase activating factor 1     | Apaf1   | 78963  | 1,22 | down |
| 6160921 | 7323725 | 1680452 | apoptotic peptidase activating factor 1     | Apaf1   | 78963  | 1,06 | up   |
| 6180627 | 7323725 | 1680467 | apoptotic peptidase activating factor 1     | Apaf1   | 78963  | 1,18 | up   |
| 6209852 | 7323725 | 1680453 | apoptotic peptidase activating factor 1     | Apaf1   | 78963  | 1,32 | down |
| 6233556 | 7323725 | 1680454 | apoptotic peptidase activating factor 1     | Apaf1   | 78963  | 1,03 | down |
| 6355215 | 7323725 | 1680465 | apoptotic peptidase activating factor 1     | Apaf1   | 78963  | 1,08 | down |
| 6492124 | 7323725 | 1680466 | apoptotic peptidase activating factor 1     | Apaf1   | 78963  | 1,08 | down |
| 6616828 | 7323725 | 1680466 | apoptotic peptidase activating factor 1     | Apaf1   | 78963  | 1,72 | down |
| 6618357 | 7323725 | 1680462 | apoptotic peptidase activating factor 1     | Apaf1   | 78963  | 1,01 | down |
| 6619268 | 7323725 | 1680446 | apoptotic peptidase activating factor 1     | Apaf1   | 78963  | 1,43 | up   |
| 6633634 | 7323725 | 1680443 | apoptotic peptidase activating factor 1     | Apaf1   | 78963  | 1,72 | down |
| 6641136 | 7323725 | 1680445 | apoptotic peptidase activating factor 1     | Apaf1   | 78963  | 1,10 | down |
| 6644288 | 7323725 | 1680449 | apoptotic peptidase activating factor 1     | Apaf1   | 78963  | 1,52 | up   |
| 6649829 | 7323725 | 1680448 | apoptotic peptidase activating factor 1     | Apaf1   | 78963  | 1,15 | up   |

|         |         |         |                                                          |        |        |      |      |
|---------|---------|---------|----------------------------------------------------------|--------|--------|------|------|
| 6663541 | 7323725 | 1680447 | apoptotic peptidase activating factor 1                  | Apaf1  | 78963  | 1,08 | up   |
| 6681431 | 7323725 | 1680444 | apoptotic peptidase activating factor 1                  | Apaf1  | 78963  | 1,05 | up   |
| 6707514 | 7323725 | 1680461 | apoptotic peptidase activating factor 1                  | Apaf1  | 78963  | 1,79 | up   |
| 6171348 | 7254050 | 1507627 | aquaporin 1                                              | Aqp1   | 25240  | 1,25 | up   |
| 6246863 | 7254050 | 1507625 | aquaporin 1                                              | Aqp1   | 25240  | 1,06 | up   |
| 6266020 | 7254050 | 1507624 | aquaporin 1                                              | Aqp1   | 25240  | 1,09 | down |
| 6459283 | 7254050 | 1507626 | aquaporin 1                                              | Aqp1   | 25240  | 2,23 | down |
| 6464683 | 7254050 | 1507623 | aquaporin 1                                              | Aqp1   | 25240  | 1,39 | up   |
| 5664118 | 7282343 | 1578684 | ArfGAP with coiled-coil, ankyrin repeat and PH domains 3 | Acap3  | 313772 | 1,71 | down |
| 5683422 | 7282343 | 1578675 | ArfGAP with coiled-coil, ankyrin repeat and PH domains 3 | Acap3  | 313772 | 1,21 | up   |
| 5693237 | 7282343 | 1578692 | ArfGAP with coiled-coil, ankyrin repeat and PH domains 3 | Acap3  | 313772 | 1,09 | down |
| 5717185 | 7282343 | 1578667 | ArfGAP with coiled-coil, ankyrin repeat and PH domains 3 | Acap3  | 313772 | 1,01 | up   |
| 5823929 | 7282343 | 1578686 | ArfGAP with coiled-coil, ankyrin repeat and PH domains 3 | Acap3  | 313772 | 1,38 | down |
| 5826245 | 7282343 | 1578686 | ArfGAP with coiled-coil, ankyrin repeat and PH domains 3 | Acap3  | 313772 | 1,02 | up   |
| 5874786 | 7282343 | 1578692 | ArfGAP with coiled-coil, ankyrin repeat and PH domains 3 | Acap3  | 313772 | 1,31 | down |
| 5876195 | 7282343 | 1578674 | ArfGAP with coiled-coil, ankyrin repeat and PH domains 3 | Acap3  | 313772 | 1,08 | down |
| 5878399 | 7282343 | 1578692 | ArfGAP with coiled-coil, ankyrin repeat and PH domains 3 | Acap3  | 313772 | 1,14 | up   |
| 5904326 | 7282343 | 1578686 | ArfGAP with coiled-coil, ankyrin repeat and PH domains 3 | Acap3  | 313772 | 1,56 | up   |
| 5925764 | 7282343 | 1578662 | ArfGAP with coiled-coil, ankyrin repeat and PH domains 3 | Acap3  | 313772 | 1,80 | down |
| 6017723 | 7282343 | 1578691 | ArfGAP with coiled-coil, ankyrin repeat and PH domains 3 | Acap3  | 313772 | 1,33 | up   |
| 6034431 | 7282343 | 1578684 | ArfGAP with coiled-coil, ankyrin repeat and PH domains 3 | Acap3  | 313772 | 1,19 | up   |
| 6135490 | 7282343 | 1578690 | ArfGAP with coiled-coil, ankyrin repeat and PH domains 3 | Acap3  | 313772 | 1,03 | down |
| 6198204 | 7282343 | 1578688 | ArfGAP with coiled-coil, ankyrin repeat and PH domains 3 | Acap3  | 313772 | 1,06 | down |
| 6248054 | 7282343 | 1578679 | ArfGAP with coiled-coil, ankyrin repeat and PH domains 3 | Acap3  | 313772 | 1,17 | up   |
| 6260332 | 7282343 | 1578691 | ArfGAP with coiled-coil, ankyrin repeat and PH domains 3 | Acap3  | 313772 | 1,36 | down |
| 6264606 | 7282343 | 1578681 | ArfGAP with coiled-coil, ankyrin repeat and PH domains 3 | Acap3  | 313772 | 1,10 | up   |
| 6267628 | 7282343 | 1578669 | ArfGAP with coiled-coil, ankyrin repeat and PH domains 3 | Acap3  | 313772 | 1,36 | down |
| 6344437 | 7282343 | 1578671 | ArfGAP with coiled-coil, ankyrin repeat and PH domains 3 | Acap3  | 313772 | 1,01 | down |
| 6351266 | 7282343 | 1578673 | ArfGAP with coiled-coil, ankyrin repeat and PH domains 3 | Acap3  | 313772 | 1,25 | up   |
| 6355824 | 7282343 | 1578682 | ArfGAP with coiled-coil, ankyrin repeat and PH domains 3 | Acap3  | 313772 | 1,14 | up   |
| 6395737 | 7282343 | 1578663 | ArfGAP with coiled-coil, ankyrin repeat and PH domains 3 | Acap3  | 313772 | 1,22 | up   |
| 6458715 | 7282343 | 1578680 | ArfGAP with coiled-coil, ankyrin repeat and PH domains 3 | Acap3  | 313772 | 1,03 | down |
| 6470869 | 7282343 | 1578689 | ArfGAP with coiled-coil, ankyrin repeat and PH domains 3 | Acap3  | 313772 | 1,00 | up   |
| 6486960 | 7282343 | 1578692 | ArfGAP with coiled-coil, ankyrin repeat and PH domains 3 | Acap3  | 313772 | 1,08 | down |
| 6539326 | 7282343 | 1578672 | ArfGAP with coiled-coil, ankyrin repeat and PH domains 3 | Acap3  | 313772 | 1,13 | up   |
| 6617221 | 7282343 | 1578687 | ArfGAP with coiled-coil, ankyrin repeat and PH domains 3 | Acap3  | 313772 | 1,09 | down |
| 6638859 | 7282343 | 1578692 | ArfGAP with coiled-coil, ankyrin repeat and PH domains 3 | Acap3  | 313772 | 1,18 | down |
| 6641421 | 7282343 | 1578676 | ArfGAP with coiled-coil, ankyrin repeat and PH domains 3 | Acap3  | 313772 | 1,05 | down |
| 6651701 | 7282343 | 1578683 | ArfGAP with coiled-coil, ankyrin repeat and PH domains 3 | Acap3  | 313772 | 1,06 | down |
| 6664485 | 7282343 | 1578685 | ArfGAP with coiled-coil, ankyrin repeat and PH domains 3 | Acap3  | 313772 | 1,21 | up   |
| 6686133 | 7282343 | 1578670 | ArfGAP with coiled-coil, ankyrin repeat and PH domains 3 | Acap3  | 313772 | 1,14 | down |
| 5653337 | 7151468 | 1254147 | Arg/Abl-interacting protein ArgBP2                       | Argbp2 | 114901 | 1,57 | down |
| 5671356 | 7151468 | 1254152 | Arg/Abl-interacting protein ArgBP2                       | Argbp2 | 114901 | 1,21 | down |
| 5709283 | 7151468 | 1254166 | Arg/Abl-interacting protein ArgBP2                       | Argbp2 | 114901 | 1,07 | down |
| 5718409 | 7151468 | 1254167 | Arg/Abl-interacting protein ArgBP2                       | Argbp2 | 114901 | 1,31 | down |
| 5747520 | 7151468 | 1254161 | Arg/Abl-interacting protein ArgBP2                       | Argbp2 | 114901 | 1,23 | up   |
| 5818651 | 7151468 | 1254156 | Arg/Abl-interacting protein ArgBP2                       | Argbp2 | 114901 | 1,12 | up   |
| 5818988 | 7151468 | 1254169 | Arg/Abl-interacting protein ArgBP2                       | Argbp2 | 114901 | 1,95 | up   |
| 5877518 | 7151468 | 1254156 | Arg/Abl-interacting protein ArgBP2                       | Argbp2 | 114901 | 1,38 | down |
| 5898027 | 7151468 | 1254145 | Arg/Abl-interacting protein ArgBP2                       | Argbp2 | 114901 | 1,22 | down |
| 5943858 | 7151468 | 1254160 | Arg/Abl-interacting protein ArgBP2                       | Argbp2 | 114901 | 1,21 | down |
| 5949692 | 7151468 | 1254148 | Arg/Abl-interacting protein ArgBP2                       | Argbp2 | 114901 | 1,20 | down |
| 5987679 | 7151468 | 1254147 | Arg/Abl-interacting protein ArgBP2                       | Argbp2 | 114901 | 1,32 | up   |
| 6014142 | 7151468 | 1254146 | Arg/Abl-interacting protein ArgBP2                       | Argbp2 | 114901 | 1,60 | down |
| 6041232 | 7151468 | 1254162 | Arg/Abl-interacting protein ArgBP2                       | Argbp2 | 114901 | 1,11 | down |
| 6087516 | 7151468 | 1254169 | Arg/Abl-interacting protein ArgBP2                       | Argbp2 | 114901 | 1,24 | down |



|         |         |         |                                                              |        |        |      |      |
|---------|---------|---------|--------------------------------------------------------------|--------|--------|------|------|
| 6111481 | 7151468 | 1254165 | Arg/Abl-interacting protein ArgBP2                           | Argbp2 | 114901 | 1,40 | up   |
| 6117034 | 7151468 | 1254155 | Arg/Abl-interacting protein ArgBP2                           | Argbp2 | 114901 | 1,25 | down |
| 6121053 | 7151468 | 1254164 | Arg/Abl-interacting protein ArgBP2                           | Argbp2 | 114901 | 1,10 | up   |
| 6151152 | 7151468 | 1254167 | Arg/Abl-interacting protein ArgBP2                           | Argbp2 | 114901 | 1,05 | up   |
| 6156251 | 7151468 | 1254159 | Arg/Abl-interacting protein ArgBP2                           | Argbp2 | 114901 | 1,00 | down |
| 6168886 | 7151468 | 1254151 | Arg/Abl-interacting protein ArgBP2                           | Argbp2 | 114901 | 1,42 | down |
| 6248775 | 7151468 | 1254168 | Arg/Abl-interacting protein ArgBP2                           | Argbp2 | 114901 | 1,12 | down |
| 6397133 | 7151468 | 1254156 | Arg/Abl-interacting protein ArgBP2                           | Argbp2 | 114901 | 2,05 | up   |
| 6467388 | 7151468 | 1254150 | Arg/Abl-interacting protein ArgBP2                           | Argbp2 | 114901 | 1,04 | up   |
| 6538998 | 7151468 | 1254163 | Arg/Abl-interacting protein ArgBP2                           | Argbp2 | 114901 | 1,13 | up   |
| 6541345 | 7151468 | 1254166 | Arg/Abl-interacting protein ArgBP2                           | Argbp2 | 114901 | 1,07 | down |
| 6572138 | 7151468 | 1254157 | Arg/Abl-interacting protein ArgBP2                           | Argbp2 | 114901 | 1,01 | down |
| 6592698 | 7151468 | 1254149 | Arg/Abl-interacting protein ArgBP2                           | Argbp2 | 114901 | 1,18 | up   |
| 6607649 | 7151468 | 1254158 | Arg/Abl-interacting protein ArgBP2                           | Argbp2 | 114901 | 1,33 | up   |
| 6616482 | 7151468 | 1254154 | Arg/Abl-interacting protein ArgBP2                           | Argbp2 | 114901 | 1,16 | up   |
| 6674895 | 7151468 | 1254153 | Arg/Abl-interacting protein ArgBP2                           | Argbp2 | 114901 | 1,15 | down |
| 6701006 | 7151468 | 1254163 | Arg/Abl-interacting protein ArgBP2                           | Argbp2 | 114901 | 1,12 | up   |
| 5660440 | 7273983 | 1557526 | arginyl-tRNA synthetase 2, mitochondrial                     | Rars2  | 297969 | 1,03 | up   |
| 5663977 | 7273983 | 1557543 | arginyl-tRNA synthetase 2, mitochondrial                     | Rars2  | 297969 | 1,05 | down |
| 5724348 | 7273983 | 1557540 | arginyl-tRNA synthetase 2, mitochondrial                     | Rars2  | 297969 | 1,38 | down |
| 5765901 | 7273983 | 1557546 | arginyl-tRNA synthetase 2, mitochondrial                     | Rars2  | 297969 | 1,16 | down |
| 5847653 | 7273983 | 1557538 | arginyl-tRNA synthetase 2, mitochondrial                     | Rars2  | 297969 | 1,11 | up   |
| 5859477 | 7273983 | 1557531 | arginyl-tRNA synthetase 2, mitochondrial                     | Rars2  | 297969 | 1,13 | up   |
| 5933404 | 7273983 | 1557537 | arginyl-tRNA synthetase 2, mitochondrial                     | Rars2  | 297969 | 1,43 | down |
| 5937840 | 7273983 | 1557544 | arginyl-tRNA synthetase 2, mitochondrial                     | Rars2  | 297969 | 1,15 | down |
| 6012613 | 7273983 | 1557534 | arginyl-tRNA synthetase 2, mitochondrial                     | Rars2  | 297969 | 1,70 | up   |
| 6028627 | 7273983 | 1557525 | arginyl-tRNA synthetase 2, mitochondrial                     | Rars2  | 297969 | 1,18 | up   |
| 6080939 | 7273983 | 1557539 | arginyl-tRNA synthetase 2, mitochondrial                     | Rars2  | 297969 | 1,05 | down |
| 6357382 | 7273983 | 1557530 | arginyl-tRNA synthetase 2, mitochondrial                     | Rars2  | 297969 | 1,06 | up   |
| 6378972 | 7273983 | 1557524 | arginyl-tRNA synthetase 2, mitochondrial                     | Rars2  | 297969 | 1,14 | up   |
| 6398239 | 7273983 | 1557545 | arginyl-tRNA synthetase 2, mitochondrial                     | Rars2  | 297969 | 1,10 | up   |
| 6401281 | 7273983 | 1557536 | arginyl-tRNA synthetase 2, mitochondrial                     | Rars2  | 297969 | 1,20 | down |
| 6456845 | 7273983 | 1557527 | arginyl-tRNA synthetase 2, mitochondrial                     | Rars2  | 297969 | 1,11 | down |
| 6533689 | 7273983 | 1557532 | arginyl-tRNA synthetase 2, mitochondrial                     | Rars2  | 297969 | 1,03 | up   |
| 6555433 | 7273983 | 1557523 | arginyl-tRNA synthetase 2, mitochondrial                     | Rars2  | 297969 | 1,01 | up   |
| 6716974 | 7273983 | 1557535 | arginyl-tRNA synthetase 2, mitochondrial                     | Rars2  | 297969 | 1,12 | down |
| 6741713 | 7273983 | 1557542 | arginyl-tRNA synthetase 2, mitochondrial                     | Rars2  | 297969 | 1,11 | down |
| 5681309 | 7375561 | 1810505 | aristaless related homeobox                                  | Arx    | 317268 | 1,12 | down |
| 5835692 | 7375561 | 1810503 | aristaless related homeobox                                  | Arx    | 317268 | 1,02 | up   |
| 5850664 | 7375561 | 1810505 | aristaless related homeobox                                  | Arx    | 317268 | 1,02 | down |
| 5922272 | 7375561 | 1810499 | aristaless related homeobox                                  | Arx    | 317268 | 1,14 | up   |
| 5930242 | 7375561 | 1810498 | aristaless related homeobox                                  | Arx    | 317268 | 1,04 | up   |
| 6095146 | 7375561 | 1810500 | aristaless related homeobox                                  | Arx    | 317268 | 1,05 | down |
| 6128869 | 7375561 | 1810505 | aristaless related homeobox                                  | Arx    | 317268 | 3,30 | down |
| 6153680 | 7375561 | 1810499 | aristaless related homeobox                                  | Arx    | 317268 | 1,19 | down |
| 6247329 | 7375561 | 1810499 | aristaless related homeobox                                  | Arx    | 317268 | 1,20 | up   |
| 6272174 | 7375561 | 1810499 | aristaless related homeobox                                  | Arx    | 317268 | 1,10 | down |
| 6391664 | 7375561 | 1810499 | aristaless related homeobox                                  | Arx    | 317268 | 1,31 | up   |
| 6429836 | 7375561 | 1810499 | aristaless related homeobox                                  | Arx    | 317268 | 1,83 | up   |
| 6481716 | 7375561 | 1810498 | aristaless related homeobox                                  | Arx    | 317268 | 1,63 | down |
| 6508785 | 7375561 | 1810495 | aristaless related homeobox                                  | Arx    | 317268 | 1,64 | down |
| 5650795 | 7095262 | 1115656 | armadillo repeat gene deleted in velo-cardio-facial syndrome | Arvcf  | 303798 | 1,34 | up   |
| 5698903 | 7095262 | 1115635 | armadillo repeat gene deleted in velo-cardio-facial syndrome | Arvcf  | 303798 | 1,07 | up   |
| 5831718 | 7095262 | 1115639 | armadillo repeat gene deleted in velo-cardio-facial syndrome | Arvcf  | 303798 | 1,18 | down |
| 5899611 | 7095262 | 1115645 | armadillo repeat gene deleted in velo-cardio-facial syndrome | Arvcf  | 303798 | 1,51 | down |
| 6064049 | 7095262 | 1115650 | armadillo repeat gene deleted in velo-cardio-facial syndrome | Arvcf  | 303798 | 1,25 | down |

|         |         |         |                                                              |        |        |      |      |
|---------|---------|---------|--------------------------------------------------------------|--------|--------|------|------|
| 6170507 | 7095262 | 1115643 | armadillo repeat gene deleted in velo-cardio-facial syndrome | Arvcf  | 303798 | 1,37 | down |
| 6229265 | 7095262 | 1115640 | armadillo repeat gene deleted in velo-cardio-facial syndrome | Arvcf  | 303798 | 1,21 | up   |
| 6311654 | 7095262 | 1115638 | armadillo repeat gene deleted in velo-cardio-facial syndrome | Arvcf  | 303798 | 1,95 | down |
| 6319656 | 7095262 | 1115641 | armadillo repeat gene deleted in velo-cardio-facial syndrome | Arvcf  | 303798 | 1,08 | down |
| 6332286 | 7095262 | 1115640 | armadillo repeat gene deleted in velo-cardio-facial syndrome | Arvcf  | 303798 | 1,03 | down |
| 6421213 | 7095262 | 1115651 | armadillo repeat gene deleted in velo-cardio-facial syndrome | Arvcf  | 303798 | 1,70 | down |
| 6452842 | 7095262 | 1115637 | armadillo repeat gene deleted in velo-cardio-facial syndrome | Arvcf  | 303798 | 1,67 | up   |
| 6466545 | 7095262 | 1115651 | armadillo repeat gene deleted in velo-cardio-facial syndrome | Arvcf  | 303798 | 1,18 | down |
| 6474207 | 7095262 | 1115648 | armadillo repeat gene deleted in velo-cardio-facial syndrome | Arvcf  | 303798 | 1,14 | down |
| 6516660 | 7095262 | 1115665 | armadillo repeat gene deleted in velo-cardio-facial syndrome | Arvcf  | 303798 | 1,44 | up   |
| 6571838 | 7095262 | 1115635 | armadillo repeat gene deleted in velo-cardio-facial syndrome | Arvcf  | 303798 | 1,12 | down |
| 6586004 | 7095262 | 1115642 | armadillo repeat gene deleted in velo-cardio-facial syndrome | Arvcf  | 303798 | 1,38 | down |
| 6590720 | 7095262 | 1115652 | armadillo repeat gene deleted in velo-cardio-facial syndrome | Arvcf  | 303798 | 1,10 | up   |
| 6630005 | 7095262 | 1115664 | armadillo repeat gene deleted in velo-cardio-facial syndrome | Arvcf  | 303798 | 1,00 | down |
| 6667082 | 7095262 | 1115647 | armadillo repeat gene deleted in velo-cardio-facial syndrome | Arvcf  | 303798 | 1,12 | up   |
| 5646519 | 7144135 | 1236326 | arrestin domain containing 2                                 | Arrdc2 | 306344 | 1,98 | down |
| 5747005 | 7144135 | 1236327 | arrestin domain containing 2                                 | Arrdc2 | 306344 | 1,65 | down |
| 5976398 | 7144135 | 1236323 | arrestin domain containing 2                                 | Arrdc2 | 306344 | 1,60 | up   |
| 6033331 | 7144135 | 1236327 | arrestin domain containing 2                                 | Arrdc2 | 306344 | 1,02 | down |
| 6066300 | 7144135 | 1236327 | arrestin domain containing 2                                 | Arrdc2 | 306344 | 1,45 | up   |
| 6077747 | 7144135 | 1236326 | arrestin domain containing 2                                 | Arrdc2 | 306344 | 1,26 | up   |
| 6107210 | 7144135 | 1236323 | arrestin domain containing 2                                 | Arrdc2 | 306344 | 1,26 | down |
| 6114431 | 7144135 | 1236325 | arrestin domain containing 2                                 | Arrdc2 | 306344 | 1,65 | up   |
| 6148156 | 7144135 | 1236323 | arrestin domain containing 2                                 | Arrdc2 | 306344 | 1,18 | down |
| 6150452 | 7144135 | 1236324 | arrestin domain containing 2                                 | Arrdc2 | 306344 | 2,24 | up   |
| 6195265 | 7144135 | 1236325 | arrestin domain containing 2                                 | Arrdc2 | 306344 | 1,17 | down |
| 6249731 | 7144135 | 1236323 | arrestin domain containing 2                                 | Arrdc2 | 306344 | 1,05 | down |
| 6359334 | 7144135 | 1236323 | arrestin domain containing 2                                 | Arrdc2 | 306344 | 1,33 | down |
| 6479802 | 7144135 | 1236323 | arrestin domain containing 2                                 | Arrdc2 | 306344 | 1,35 | down |
| 6489678 | 7144135 | 1236327 | arrestin domain containing 2                                 | Arrdc2 | 306344 | 1,21 | up   |
| 6510461 | 7144135 | 1236323 | arrestin domain containing 2                                 | Arrdc2 | 306344 | 1,28 | down |
| 6546959 | 7144135 | 1236327 | arrestin domain containing 2                                 | Arrdc2 | 306344 | 1,29 | down |
| 6605117 | 7144135 | 1236327 | arrestin domain containing 2                                 | Arrdc2 | 306344 | 1,12 | up   |
| 6738183 | 7144135 | 1236326 | arrestin domain containing 2                                 | Arrdc2 | 306344 | 1,87 | up   |
| 5662890 | 7052567 | 1015264 | arrestin domain containing 4                                 | Arrdc4 | 293019 | 1,10 | up   |
| 5743018 | 7052567 | 1015263 | arrestin domain containing 4                                 | Arrdc4 | 293019 | 1,25 | down |
| 5981442 | 7052567 | 1015265 | arrestin domain containing 4                                 | Arrdc4 | 293019 | 1,46 | up   |
| 6092882 | 7052567 | 1015260 | arrestin domain containing 4                                 | Arrdc4 | 293019 | 1,02 | up   |
| 6219756 | 7052567 | 1015265 | arrestin domain containing 4                                 | Arrdc4 | 293019 | 1,26 | up   |
| 6237855 | 7052567 | 1015256 | arrestin domain containing 4                                 | Arrdc4 | 293019 | 1,16 | up   |
| 6365014 | 7052567 | 1015261 | arrestin domain containing 4                                 | Arrdc4 | 293019 | 1,22 | up   |
| 6565143 | 7052567 | 1015267 | arrestin domain containing 4                                 | Arrdc4 | 293019 | 1,43 | down |
| 5675501 | 7290406 | 1597669 | artemin                                                      | Artn   | 362572 | 2,17 | up   |
| 5733080 | 7290406 | 1597668 | artemin                                                      | Artn   | 362572 | 1,61 | down |
| 5824069 | 7290406 | 1597672 | artemin                                                      | Artn   | 362572 | 1,01 | down |
| 5864857 | 7290406 | 1597671 | artemin                                                      | Artn   | 362572 | 2,07 | down |
| 5890204 | 7290406 | 1597668 | artemin                                                      | Artn   | 362572 | 1,00 | up   |
| 5960289 | 7290406 | 1597670 | artemin                                                      | Artn   | 362572 | 1,10 | up   |
| 5966491 | 7290406 | 1597669 | artemin                                                      | Artn   | 362572 | 1,13 | down |
| 5994593 | 7290406 | 1597668 | artemin                                                      | Artn   | 362572 | 1,62 | up   |
| 6194116 | 7290406 | 1597671 | artemin                                                      | Artn   | 362572 | 1,06 | down |
| 6340353 | 7290406 | 1597669 | artemin                                                      | Artn   | 362572 | 1,02 | down |
| 6396548 | 7290406 | 1597667 | artemin                                                      | Artn   | 362572 | 1,00 | down |
| 6741962 | 7290406 | 1597669 | artemin                                                      | Artn   | 362572 | 1,54 | down |
| 5693055 | 7196966 | 1367645 | aryl hydrocarbon receptor nuclear translocator               | Arnt   | 25242  | 1,19 | up   |
| 5749068 | 7196966 | 1367643 | aryl hydrocarbon receptor nuclear translocator               | Arnt   | 25242  | 1,19 | down |

|         |         |         |                                                                      |       |        |      |      |
|---------|---------|---------|----------------------------------------------------------------------|-------|--------|------|------|
| 5832169 | 7196966 | 1367637 | aryl hydrocarbon receptor nuclear translocator                       | Arnt  | 25242  | 1,19 | up   |
| 5877052 | 7196966 | 1367636 | aryl hydrocarbon receptor nuclear translocator                       | Arnt  | 25242  | 1,05 | up   |
| 5929568 | 7196966 | 1367631 | aryl hydrocarbon receptor nuclear translocator                       | Arnt  | 25242  | 1,70 | down |
| 5938284 | 7196966 | 1367634 | aryl hydrocarbon receptor nuclear translocator                       | Arnt  | 25242  | 1,07 | up   |
| 5960755 | 7196966 | 1367636 | aryl hydrocarbon receptor nuclear translocator                       | Arnt  | 25242  | 1,02 | up   |
| 5991420 | 7196966 | 1367649 | aryl hydrocarbon receptor nuclear translocator                       | Arnt  | 25242  | 1,32 | up   |
| 6037680 | 7196966 | 1367629 | aryl hydrocarbon receptor nuclear translocator                       | Arnt  | 25242  | 1,35 | up   |
| 6046516 | 7196966 | 1367630 | aryl hydrocarbon receptor nuclear translocator                       | Arnt  | 25242  | 1,25 | up   |
| 6050349 | 7196966 | 1367646 | aryl hydrocarbon receptor nuclear translocator                       | Arnt  | 25242  | 1,08 | down |
| 6053360 | 7196966 | 1367644 | aryl hydrocarbon receptor nuclear translocator                       | Arnt  | 25242  | 1,28 | up   |
| 6171596 | 7196966 | 1367635 | aryl hydrocarbon receptor nuclear translocator                       | Arnt  | 25242  | 1,02 | up   |
| 6178310 | 7196966 | 1367635 | aryl hydrocarbon receptor nuclear translocator                       | Arnt  | 25242  | 1,12 | up   |
| 6222315 | 7196966 | 1367640 | aryl hydrocarbon receptor nuclear translocator                       | Arnt  | 25242  | 1,21 | down |
| 6254791 | 7196966 | 1367634 | aryl hydrocarbon receptor nuclear translocator                       | Arnt  | 25242  | 1,69 | up   |
| 6277591 | 7196966 | 1367648 | aryl hydrocarbon receptor nuclear translocator                       | Arnt  | 25242  | 1,10 | down |
| 6301649 | 7196966 | 1367642 | aryl hydrocarbon receptor nuclear translocator                       | Arnt  | 25242  | 1,02 | down |
| 6315340 | 7196966 | 1367651 | aryl hydrocarbon receptor nuclear translocator                       | Arnt  | 25242  | 1,10 | down |
| 6379950 | 7196966 | 1367632 | aryl hydrocarbon receptor nuclear translocator                       | Arnt  | 25242  | 1,06 | up   |
| 6383806 | 7196966 | 1367640 | aryl hydrocarbon receptor nuclear translocator                       | Arnt  | 25242  | 2,27 | down |
| 6438112 | 7196966 | 1367647 | aryl hydrocarbon receptor nuclear translocator                       | Arnt  | 25242  | 1,73 | down |
| 6475821 | 7196966 | 1367650 | aryl hydrocarbon receptor nuclear translocator                       | Arnt  | 25242  | 1,21 | up   |
| 6582301 | 7196966 | 1367638 | aryl hydrocarbon receptor nuclear translocator                       | Arnt  | 25242  | 1,08 | down |
| 6589829 | 7196966 | 1367639 | aryl hydrocarbon receptor nuclear translocator                       | Arnt  | 25242  | 1,14 | up   |
| 6712088 | 7196966 | 1367634 | aryl hydrocarbon receptor nuclear translocator                       | Arnt  | 25242  | 1,13 | up   |
| 6738716 | 7196966 | 1367641 | aryl hydrocarbon receptor nuclear translocator                       | Arnt  | 25242  | 1,28 | down |
| 5745538 | 7069195 | 1053999 | asialoglycoprotein receptor 2                                        | Asgr2 | 29403  | 1,01 | down |
| 6016489 | 7069195 | 1053995 | asialoglycoprotein receptor 2                                        | Asgr2 | 29403  | 1,11 | up   |
| 6058320 | 7069195 | 1054002 | asialoglycoprotein receptor 2                                        | Asgr2 | 29403  | 1,07 | down |
| 6135591 | 7069195 | 1053996 | asialoglycoprotein receptor 2                                        | Asgr2 | 29403  | 1,09 | up   |
| 6266488 | 7069195 | 1054001 | asialoglycoprotein receptor 2                                        | Asgr2 | 29403  | 1,57 | down |
| 6266870 | 7069195 | 1054003 | asialoglycoprotein receptor 2                                        | Asgr2 | 29403  | 1,40 | up   |
| 6276287 | 7069195 | 1054000 | asialoglycoprotein receptor 2                                        | Asgr2 | 29403  | 1,10 | down |
| 6311011 | 7069195 | 1053996 | asialoglycoprotein receptor 2                                        | Asgr2 | 29403  | 1,09 | down |
| 6323155 | 7069195 | 1053996 | asialoglycoprotein receptor 2                                        | Asgr2 | 29403  | 1,50 | up   |
| 6450366 | 7069195 | 1053997 | asialoglycoprotein receptor 2                                        | Asgr2 | 29403  | 1,11 | down |
| 6567348 | 7069195 | 1053998 | asialoglycoprotein receptor 2                                        | Asgr2 | 29403  | 1,05 | down |
| 6608247 | 7069195 | 1054000 | asialoglycoprotein receptor 2                                        | Asgr2 | 29403  | 1,08 | up   |
| 6649923 | 7069195 | 1053997 | asialoglycoprotein receptor 2                                        | Asgr2 | 29403  | 2,59 | down |
| 6696720 | 7069195 | 1054000 | asialoglycoprotein receptor 2                                        | Asgr2 | 29403  | 1,26 | down |
| 5643006 | 7105814 | 1141787 | asp (abnormal spindle) homolog, microcephaly associated (Drosophila) | Aspm  | 289054 | 1,17 | up   |
| 5649128 | 7105814 | 1141781 | asp (abnormal spindle) homolog, microcephaly associated (Drosophila) | Aspm  | 289054 | 1,03 | up   |
| 5762811 | 7105814 | 1141786 | asp (abnormal spindle) homolog, microcephaly associated (Drosophila) | Aspm  | 289054 | 1,10 | up   |
| 5780628 | 7105814 | 1141784 | asp (abnormal spindle) homolog, microcephaly associated (Drosophila) | Aspm  | 289054 | 1,11 | down |
| 5782337 | 7105814 | 1141793 | asp (abnormal spindle) homolog, microcephaly associated (Drosophila) | Aspm  | 289054 | 1,24 | down |
| 5797639 | 7105814 | 1141780 | asp (abnormal spindle) homolog, microcephaly associated (Drosophila) | Aspm  | 289054 | 1,25 | up   |
| 5849143 | 7105814 | 1141777 | asp (abnormal spindle) homolog, microcephaly associated (Drosophila) | Aspm  | 289054 | 1,44 | down |
| 5854761 | 7105814 | 1141787 | asp (abnormal spindle) homolog, microcephaly associated (Drosophila) | Aspm  | 289054 | 1,07 | down |
| 5859471 | 7105814 | 1141794 | asp (abnormal spindle) homolog, microcephaly associated (Drosophila) | Aspm  | 289054 | 1,20 | up   |
| 5859759 | 7105814 | 1141796 | asp (abnormal spindle) homolog, microcephaly associated (Drosophila) | Aspm  | 289054 | 1,22 | up   |
| 5877333 | 7105814 | 1141777 | asp (abnormal spindle) homolog, microcephaly associated (Drosophila) | Aspm  | 289054 | 1,27 | up   |
| 5880851 | 7105814 | 1141791 | asp (abnormal spindle) homolog, microcephaly associated (Drosophila) | Aspm  | 289054 | 1,12 | up   |
| 5910820 | 7105814 | 1141779 | asp (abnormal spindle) homolog, microcephaly associated (Drosophila) | Aspm  | 289054 | 1,33 | up   |
| 5940328 | 7105814 | 1141783 | asp (abnormal spindle) homolog, microcephaly associated (Drosophila) | Aspm  | 289054 | 1,02 | down |
| 5942959 | 7105814 | 1141774 | asp (abnormal spindle) homolog, microcephaly associated (Drosophila) | Aspm  | 289054 | 1,32 | down |
| 5943908 | 7105814 | 1141785 | asp (abnormal spindle) homolog, microcephaly associated (Drosophila) | Aspm  | 289054 | 1,00 | up   |
| 5957665 | 7105814 | 1141800 | asp (abnormal spindle) homolog, microcephaly associated (Drosophila) | Aspm  | 289054 | 1,18 | up   |

|         |         |         |                                                                      |        |        |      |      |
|---------|---------|---------|----------------------------------------------------------------------|--------|--------|------|------|
| 5986520 | 7105814 | 1141788 | asp (abnormal spindle) homolog, microcephaly associated (Drosophila) | Aspm   | 289054 | 1,22 | up   |
| 6017191 | 7105814 | 1141802 | asp (abnormal spindle) homolog, microcephaly associated (Drosophila) | Aspm   | 289054 | 1,13 | down |
| 6127386 | 7105814 | 1141799 | asp (abnormal spindle) homolog, microcephaly associated (Drosophila) | Aspm   | 289054 | 1,14 | up   |
| 6175856 | 7105814 | 1141791 | asp (abnormal spindle) homolog, microcephaly associated (Drosophila) | Aspm   | 289054 | 1,10 | up   |
| 6179095 | 7105814 | 1141789 | asp (abnormal spindle) homolog, microcephaly associated (Drosophila) | Aspm   | 289054 | 1,04 | up   |
| 6224315 | 7105814 | 1141790 | asp (abnormal spindle) homolog, microcephaly associated (Drosophila) | Aspm   | 289054 | 1,14 | down |
| 6230663 | 7105814 | 1141804 | asp (abnormal spindle) homolog, microcephaly associated (Drosophila) | Aspm   | 289054 | 1,08 | up   |
| 6242291 | 7105814 | 1141791 | asp (abnormal spindle) homolog, microcephaly associated (Drosophila) | Aspm   | 289054 | 1,14 | up   |
| 6279276 | 7105814 | 1141776 | asp (abnormal spindle) homolog, microcephaly associated (Drosophila) | Aspm   | 289054 | 1,86 | down |
| 6319296 | 7105814 | 1141785 | asp (abnormal spindle) homolog, microcephaly associated (Drosophila) | Aspm   | 289054 | 1,26 | down |
| 6382843 | 7105814 | 1141786 | asp (abnormal spindle) homolog, microcephaly associated (Drosophila) | Aspm   | 289054 | 1,18 | up   |
| 6387669 | 7105814 | 1141798 | asp (abnormal spindle) homolog, microcephaly associated (Drosophila) | Aspm   | 289054 | 1,02 | down |
| 6392478 | 7105814 | 1141797 | asp (abnormal spindle) homolog, microcephaly associated (Drosophila) | Aspm   | 289054 | 1,07 | up   |
| 6445708 | 7105814 | 1141795 | asp (abnormal spindle) homolog, microcephaly associated (Drosophila) | Aspm   | 289054 | 1,24 | up   |
| 6466133 | 7105814 | 1141782 | asp (abnormal spindle) homolog, microcephaly associated (Drosophila) | Aspm   | 289054 | 1,90 | down |
| 6518546 | 7105814 | 1141774 | asp (abnormal spindle) homolog, microcephaly associated (Drosophila) | Aspm   | 289054 | 1,45 | down |
| 6575316 | 7105814 | 1141802 | asp (abnormal spindle) homolog, microcephaly associated (Drosophila) | Aspm   | 289054 | 1,12 | down |
| 6592296 | 7105814 | 1141794 | asp (abnormal spindle) homolog, microcephaly associated (Drosophila) | Aspm   | 289054 | 1,82 | down |
| 6672222 | 7105814 | 1141803 | asp (abnormal spindle) homolog, microcephaly associated (Drosophila) | Aspm   | 289054 | 2,50 | up   |
| 6684861 | 7105814 | 1141792 | asp (abnormal spindle) homolog, microcephaly associated (Drosophila) | Aspm   | 289054 | 1,15 | up   |
| 5702160 | 7060230 | 1032041 | asparaginase like 1                                                  | Asrgl1 | 246307 | 1,43 | up   |
| 5813063 | 7060230 | 1032043 | asparaginase like 1                                                  | Asrgl1 | 246307 | 1,11 | down |
| 5867833 | 7060230 | 1032045 | asparaginase like 1                                                  | Asrgl1 | 246307 | 1,20 | up   |
| 5938927 | 7060230 | 1032044 | asparaginase like 1                                                  | Asrgl1 | 246307 | 1,23 | down |
| 5963948 | 7060230 | 1032039 | asparaginase like 1                                                  | Asrgl1 | 246307 | 2,52 | down |
| 6027953 | 7060230 | 1032042 | asparaginase like 1                                                  | Asrgl1 | 246307 | 1,12 | down |
| 6137134 | 7060230 | 1032045 | asparaginase like 1                                                  | Asrgl1 | 246307 | 1,08 | up   |
| 6282776 | 7060230 | 1032040 | asparaginase like 1                                                  | Asrgl1 | 246307 | 1,01 | up   |
| 6292946 | 7060230 | 1032040 | asparaginase like 1                                                  | Asrgl1 | 246307 | 1,13 | up   |
| 5666897 | 7151063 | 1253069 | aspartylglucosaminidase                                              | Aga    | 290923 | 1,02 | down |
| 5767508 | 7151063 | 1253073 | aspartylglucosaminidase                                              | Aga    | 290923 | 1,12 | down |
| 5930131 | 7151063 | 1253067 | aspartylglucosaminidase                                              | Aga    | 290923 | 1,67 | down |
| 6126702 | 7151063 | 1253065 | aspartylglucosaminidase                                              | Aga    | 290923 | 1,40 | down |
| 6261318 | 7151063 | 1253064 | aspartylglucosaminidase                                              | Aga    | 290923 | 1,05 | down |
| 6424896 | 7151063 | 1253063 | aspartylglucosaminidase                                              | Aga    | 290923 | 1,32 | down |
| 6449602 | 7151063 | 1253070 | aspartylglucosaminidase                                              | Aga    | 290923 | 1,07 | down |
| 6479341 | 7151063 | 1253062 | aspartylglucosaminidase                                              | Aga    | 290923 | 1,17 | up   |
| 6572963 | 7151063 | 1253068 | aspartylglucosaminidase                                              | Aga    | 290923 | 1,31 | down |
| 5635886 | 7113083 | 1159971 | aspartyl-tRNA synthetase 2 (mitochondrial)                           | Dars2  | 304919 | 1,63 | up   |
| 5673313 | 7113083 | 1159969 | aspartyl-tRNA synthetase 2 (mitochondrial)                           | Dars2  | 304919 | 1,07 | up   |
| 5694754 | 7113083 | 1159979 | aspartyl-tRNA synthetase 2 (mitochondrial)                           | Dars2  | 304919 | 1,01 | up   |
| 5734987 | 7113083 | 1159966 | aspartyl-tRNA synthetase 2 (mitochondrial)                           | Dars2  | 304919 | 1,69 | down |
| 5751285 | 7113083 | 1159975 | aspartyl-tRNA synthetase 2 (mitochondrial)                           | Dars2  | 304919 | 1,12 | down |
| 5837611 | 7113083 | 1159980 | aspartyl-tRNA synthetase 2 (mitochondrial)                           | Dars2  | 304919 | 1,34 | down |
| 5841446 | 7113083 | 1159974 | aspartyl-tRNA synthetase 2 (mitochondrial)                           | Dars2  | 304919 | 1,34 | up   |
| 5881011 | 7113083 | 1159964 | aspartyl-tRNA synthetase 2 (mitochondrial)                           | Dars2  | 304919 | 1,02 | down |
| 5961303 | 7113083 | 1159963 | aspartyl-tRNA synthetase 2 (mitochondrial)                           | Dars2  | 304919 | 1,12 | up   |
| 5995714 | 7113083 | 1159967 | aspartyl-tRNA synthetase 2 (mitochondrial)                           | Dars2  | 304919 | 1,12 | up   |
| 6198335 | 7113083 | 1159963 | aspartyl-tRNA synthetase 2 (mitochondrial)                           | Dars2  | 304919 | 1,01 | up   |
| 6206504 | 7113083 | 1159966 | aspartyl-tRNA synthetase 2 (mitochondrial)                           | Dars2  | 304919 | 2,15 | down |
| 6304189 | 7113083 | 1159973 | aspartyl-tRNA synthetase 2 (mitochondrial)                           | Dars2  | 304919 | 1,28 | down |
| 6317345 | 7113083 | 1159970 | aspartyl-tRNA synthetase 2 (mitochondrial)                           | Dars2  | 304919 | 1,20 | down |
| 6375205 | 7113083 | 1159976 | aspartyl-tRNA synthetase 2 (mitochondrial)                           | Dars2  | 304919 | 1,33 | down |
| 6446439 | 7113083 | 1159977 | aspartyl-tRNA synthetase 2 (mitochondrial)                           | Dars2  | 304919 | 1,35 | up   |
| 6598995 | 7113083 | 1159978 | aspartyl-tRNA synthetase 2 (mitochondrial)                           | Dars2  | 304919 | 1,48 | down |
| 6707338 | 7113083 | 1159972 | aspartyl-tRNA synthetase 2 (mitochondrial)                           | Dars2  | 304919 | 1,21 | down |

|         |         |         |                                                    |         |        |      |      |
|---------|---------|---------|----------------------------------------------------|---------|--------|------|------|
| 5654881 | 7320337 | 1673323 | AT rich interactive domain 2 (Arid-rfx like)       | Arid2   | 366980 | 1,04 | down |
| 6509611 | 7320337 | 1673340 | AT rich interactive domain 2 (Arid-rfx like)       | Arid2   | 366980 | 1,32 | down |
| 5777265 | 7165280 | 1287234 | AT rich interactive domain 4B (Rbp1 like)          | Arid4b  | 84481  | 1,17 | up   |
| 5811243 | 7165280 | 1287245 | AT rich interactive domain 4B (Rbp1 like)          | Arid4b  | 84481  | 1,11 | down |
| 5829076 | 7165280 | 1287240 | AT rich interactive domain 4B (Rbp1 like)          | Arid4b  | 84481  | 1,18 | down |
| 5951842 | 7165280 | 1287237 | AT rich interactive domain 4B (Rbp1 like)          | Arid4b  | 84481  | 1,04 | down |
| 5985962 | 7165280 | 1287247 | AT rich interactive domain 4B (Rbp1 like)          | Arid4b  | 84481  | 1,08 | up   |
| 6036388 | 7165280 | 1287230 | AT rich interactive domain 4B (Rbp1 like)          | Arid4b  | 84481  | 1,08 | up   |
| 6047556 | 7165280 | 1287242 | AT rich interactive domain 4B (Rbp1 like)          | Arid4b  | 84481  | 1,09 | down |
| 6080248 | 7165280 | 1287246 | AT rich interactive domain 4B (Rbp1 like)          | Arid4b  | 84481  | 1,18 | down |
| 6110453 | 7165280 | 1287229 | AT rich interactive domain 4B (Rbp1 like)          | Arid4b  | 84481  | 1,30 | up   |
| 6143984 | 7165280 | 1287241 | AT rich interactive domain 4B (Rbp1 like)          | Arid4b  | 84481  | 1,00 | down |
| 6157847 | 7165280 | 1287231 | AT rich interactive domain 4B (Rbp1 like)          | Arid4b  | 84481  | 1,21 | down |
| 6249965 | 7165280 | 1287239 | AT rich interactive domain 4B (Rbp1 like)          | Arid4b  | 84481  | 2,20 | down |
| 6271953 | 7165280 | 1287227 | AT rich interactive domain 4B (Rbp1 like)          | Arid4b  | 84481  | 1,43 | down |
| 6308910 | 7165280 | 1287229 | AT rich interactive domain 4B (Rbp1 like)          | Arid4b  | 84481  | 1,24 | down |
| 6316325 | 7165280 | 1287244 | AT rich interactive domain 4B (Rbp1 like)          | Arid4b  | 84481  | 1,15 | up   |
| 6328264 | 7165280 | 1287232 | AT rich interactive domain 4B (Rbp1 like)          | Arid4b  | 84481  | 1,14 | up   |
| 6378880 | 7165280 | 1287248 | AT rich interactive domain 4B (Rbp1 like)          | Arid4b  | 84481  | 1,27 | down |
| 6541269 | 7165280 | 1287243 | AT rich interactive domain 4B (Rbp1 like)          | Arid4b  | 84481  | 1,00 | down |
| 6551949 | 7165280 | 1287236 | AT rich interactive domain 4B (Rbp1 like)          | Arid4b  | 84481  | 1,17 | up   |
| 6573285 | 7165280 | 1287238 | AT rich interactive domain 4B (Rbp1 like)          | Arid4b  | 84481  | 1,04 | down |
| 6585856 | 7165280 | 1287235 | AT rich interactive domain 4B (Rbp1 like)          | Arid4b  | 84481  | 1,22 | up   |
| 6605698 | 7165280 | 1287233 | AT rich interactive domain 4B (Rbp1 like)          | Arid4b  | 84481  | 1,24 | up   |
| 6666111 | 7165280 | 1287228 | AT rich interactive domain 4B (Rbp1 like)          | Arid4b  | 84481  | 1,01 | down |
| 6015842 | 7218259 | 1418799 | AT rich interactive domain 5B (Mrf1 like)          | Arid5b  | 309728 | 1,07 | down |
| 6016108 | 7218259 | 1418796 | AT rich interactive domain 5B (Mrf1 like)          | Arid5b  | 309728 | 1,07 | up   |
| 6022524 | 7218259 | 1418772 | AT rich interactive domain 5B (Mrf1 like)          | Arid5b  | 309728 | 1,82 | up   |
| 6088239 | 7218259 | 1418803 | AT rich interactive domain 5B (Mrf1 like)          | Arid5b  | 309728 | 1,20 | up   |
| 6090929 | 7218259 | 1418805 | AT rich interactive domain 5B (Mrf1 like)          | Arid5b  | 309728 | 1,14 | down |
| 6255056 | 7218259 | 1418801 | AT rich interactive domain 5B (Mrf1 like)          | Arid5b  | 309728 | 1,20 | down |
| 6292381 | 7218259 | 1418785 | AT rich interactive domain 5B (Mrf1 like)          | Arid5b  | 309728 | 1,32 | up   |
| 6431325 | 7218259 | 1418798 | AT rich interactive domain 5B (Mrf1 like)          | Arid5b  | 309728 | 1,06 | up   |
| 6486865 | 7218259 | 1418777 | AT rich interactive domain 5B (Mrf1 like)          | Arid5b  | 309728 | 1,49 | up   |
| 6576894 | 7218259 | 1418805 | AT rich interactive domain 5B (Mrf1 like)          | Arid5b  | 309728 | 1,62 | down |
| 6593411 | 7218259 | 1418798 | AT rich interactive domain 5B (Mrf1 like)          | Arid5b  | 309728 | 1,91 | down |
| 6635611 | 7218259 | 1418804 | AT rich interactive domain 5B (Mrf1 like)          | Arid5b  | 309728 | 1,15 | up   |
| 6681203 | 7218259 | 1418771 | AT rich interactive domain 5B (Mrf1 like)          | Arid5b  | 309728 | 1,67 | down |
| 5635281 | 7309811 | 1647120 | ataxin 3                                           | Atxn3   | 60331  | 1,88 | down |
| 5942547 | 7309811 | 1647125 | ataxin 3                                           | Atxn3   | 60331  | 1,12 | up   |
| 6109376 | 7309811 | 1647117 | ataxin 3                                           | Atxn3   | 60331  | 1,04 | up   |
| 6194353 | 7309811 | 1647126 | ataxin 3                                           | Atxn3   | 60331  | 1,38 | down |
| 6211454 | 7309811 | 1647122 | ataxin 3                                           | Atxn3   | 60331  | 1,56 | up   |
| 6332257 | 7309811 | 1647118 | ataxin 3                                           | Atxn3   | 60331  | 1,10 | up   |
| 6398030 | 7309811 | 1647123 | ataxin 3                                           | Atxn3   | 60331  | 1,37 | up   |
| 6568647 | 7309811 | 1647127 | ataxin 3                                           | Atxn3   | 60331  | 2,24 | down |
| 6590942 | 7309811 | 1647121 | ataxin 3                                           | Atxn3   | 60331  | 1,20 | up   |
| 6614167 | 7309811 | 1647119 | ataxin 3                                           | Atxn3   | 60331  | 1,02 | down |
| 6638390 | 7309811 | 1647124 | ataxin 3                                           | Atxn3   | 60331  | 1,03 | up   |
| 6731434 | 7309811 | 1647126 | ataxin 3                                           | Atxn3   | 60331  | 1,63 | up   |
| 5749292 | 7297274 | 1614633 | ataxin 7-like 1                                    | Atxn711 | 314033 | 1,19 | down |
| 5968818 | 7297274 | 1614633 | ataxin 7-like 1                                    | Atxn711 | 314033 | 1,08 | up   |
| 5719651 | 7175368 | 1313287 | ATG12 autophagy related 12 homolog (S. cerevisiae) | Atg12   | 361321 | 2,46 | down |
| 5951824 | 7175368 | 1313281 | ATG12 autophagy related 12 homolog (S. cerevisiae) | Atg12   | 361321 | 1,08 | up   |
| 6035038 | 7175368 | 1313287 | ATG12 autophagy related 12 homolog (S. cerevisiae) | Atg12   | 361321 | 1,22 | up   |
| 6160738 | 7175368 | 1313286 | ATG12 autophagy related 12 homolog (S. cerevisiae) | Atg12   | 361321 | 1,10 | up   |

|         |         |         |                                                    |       |        |      |      |
|---------|---------|---------|----------------------------------------------------|-------|--------|------|------|
| 6166747 | 7175368 | 1313280 | ATG12 autophagy related 12 homolog (S. cerevisiae) | Atg12 | 361321 | 1,42 | down |
| 6202826 | 7175368 | 1313280 | ATG12 autophagy related 12 homolog (S. cerevisiae) | Atg12 | 361321 | 1,09 | down |
| 6555277 | 7175368 | 1313279 | ATG12 autophagy related 12 homolog (S. cerevisiae) | Atg12 | 361321 | 1,44 | up   |
| 6701533 | 7175368 | 1313281 | ATG12 autophagy related 12 homolog (S. cerevisiae) | Atg12 | 361321 | 1,28 | up   |
| 5669731 | 7039271 | 983681  | ATG2 autophagy related 2 homolog A (S. cerevisiae) | Atg2a | 689688 | 1,07 | down |
| 5686563 | 7039271 | 983702  | ATG2 autophagy related 2 homolog A (S. cerevisiae) | Atg2a | 689688 | 1,10 | down |
| 5696025 | 7039271 | 983710  | ATG2 autophagy related 2 homolog A (S. cerevisiae) | Atg2a | 689688 | 1,56 | down |
| 5697209 | 7039271 | 983701  | ATG2 autophagy related 2 homolog A (S. cerevisiae) | Atg2a | 689688 | 1,10 | up   |
| 5699412 | 7039271 | 983711  | ATG2 autophagy related 2 homolog A (S. cerevisiae) | Atg2a | 689688 | 1,41 | down |
| 5700017 | 7039271 | 983706  | ATG2 autophagy related 2 homolog A (S. cerevisiae) | Atg2a | 689688 | 1,39 | up   |
| 5702290 | 7039271 | 983707  | ATG2 autophagy related 2 homolog A (S. cerevisiae) | Atg2a | 689688 | 1,08 | up   |
| 5726511 | 7039271 | 983697  | ATG2 autophagy related 2 homolog A (S. cerevisiae) | Atg2a | 689688 | 1,01 | down |
| 5752894 | 7039271 | 983686  | ATG2 autophagy related 2 homolog A (S. cerevisiae) | Atg2a | 689688 | 1,43 | down |
| 5763034 | 7039271 | 983699  | ATG2 autophagy related 2 homolog A (S. cerevisiae) | Atg2a | 689688 | 1,13 | up   |
| 5781139 | 7039271 | 983687  | ATG2 autophagy related 2 homolog A (S. cerevisiae) | Atg2a | 689688 | 1,02 | up   |
| 5793130 | 7039271 | 983698  | ATG2 autophagy related 2 homolog A (S. cerevisiae) | Atg2a | 689688 | 1,02 | up   |
| 5814516 | 7039271 | 983688  | ATG2 autophagy related 2 homolog A (S. cerevisiae) | Atg2a | 689688 | 1,03 | up   |
| 5824256 | 7039271 | 983685  | ATG2 autophagy related 2 homolog A (S. cerevisiae) | Atg2a | 689688 | 1,34 | up   |
| 5832934 | 7039271 | 983682  | ATG2 autophagy related 2 homolog A (S. cerevisiae) | Atg2a | 689688 | 1,21 | down |
| 5897873 | 7039271 | 983697  | ATG2 autophagy related 2 homolog A (S. cerevisiae) | Atg2a | 689688 | 1,01 | up   |
| 5898995 | 7039271 | 983705  | ATG2 autophagy related 2 homolog A (S. cerevisiae) | Atg2a | 689688 | 1,07 | down |
| 5913939 | 7039271 | 983700  | ATG2 autophagy related 2 homolog A (S. cerevisiae) | Atg2a | 689688 | 1,06 | down |
| 5943917 | 7039271 | 983689  | ATG2 autophagy related 2 homolog A (S. cerevisiae) | Atg2a | 689688 | 1,08 | up   |
| 5945648 | 7039271 | 983695  | ATG2 autophagy related 2 homolog A (S. cerevisiae) | Atg2a | 689688 | 1,13 | up   |
| 6058045 | 7039271 | 983683  | ATG2 autophagy related 2 homolog A (S. cerevisiae) | Atg2a | 689688 | 1,20 | up   |
| 6067498 | 7039271 | 983680  | ATG2 autophagy related 2 homolog A (S. cerevisiae) | Atg2a | 689688 | 1,13 | up   |
| 6082363 | 7039271 | 983708  | ATG2 autophagy related 2 homolog A (S. cerevisiae) | Atg2a | 689688 | 1,03 | up   |
| 6163075 | 7039271 | 983706  | ATG2 autophagy related 2 homolog A (S. cerevisiae) | Atg2a | 689688 | 1,80 | down |
| 6209797 | 7039271 | 983696  | ATG2 autophagy related 2 homolog A (S. cerevisiae) | Atg2a | 689688 | 1,09 | down |
| 6217766 | 7039271 | 983704  | ATG2 autophagy related 2 homolog A (S. cerevisiae) | Atg2a | 689688 | 1,01 | down |
| 6247637 | 7039271 | 983706  | ATG2 autophagy related 2 homolog A (S. cerevisiae) | Atg2a | 689688 | 1,41 | down |
| 6260432 | 7039271 | 983715  | ATG2 autophagy related 2 homolog A (S. cerevisiae) | Atg2a | 689688 | 1,35 | down |
| 6262564 | 7039271 | 983712  | ATG2 autophagy related 2 homolog A (S. cerevisiae) | Atg2a | 689688 | 1,40 | down |
| 6271669 | 7039271 | 983705  | ATG2 autophagy related 2 homolog A (S. cerevisiae) | Atg2a | 689688 | 1,14 | down |
| 6310461 | 7039271 | 983694  | ATG2 autophagy related 2 homolog A (S. cerevisiae) | Atg2a | 689688 | 1,03 | down |
| 6317912 | 7039271 | 983691  | ATG2 autophagy related 2 homolog A (S. cerevisiae) | Atg2a | 689688 | 1,11 | up   |
| 6339242 | 7039271 | 983693  | ATG2 autophagy related 2 homolog A (S. cerevisiae) | Atg2a | 689688 | 1,17 | up   |
| 6345228 | 7039271 | 983717  | ATG2 autophagy related 2 homolog A (S. cerevisiae) | Atg2a | 689688 | 1,26 | down |
| 6394030 | 7039271 | 983685  | ATG2 autophagy related 2 homolog A (S. cerevisiae) | Atg2a | 689688 | 1,03 | up   |
| 6456162 | 7039271 | 983688  | ATG2 autophagy related 2 homolog A (S. cerevisiae) | Atg2a | 689688 | 2,26 | up   |
| 6463499 | 7039271 | 983709  | ATG2 autophagy related 2 homolog A (S. cerevisiae) | Atg2a | 689688 | 1,28 | down |
| 6498412 | 7039271 | 983713  | ATG2 autophagy related 2 homolog A (S. cerevisiae) | Atg2a | 689688 | 1,08 | down |
| 6514936 | 7039271 | 983706  | ATG2 autophagy related 2 homolog A (S. cerevisiae) | Atg2a | 689688 | 1,01 | up   |
| 6519325 | 7039271 | 983700  | ATG2 autophagy related 2 homolog A (S. cerevisiae) | Atg2a | 689688 | 1,19 | up   |
| 6519401 | 7039271 | 983684  | ATG2 autophagy related 2 homolog A (S. cerevisiae) | Atg2a | 689688 | 1,10 | up   |
| 6577805 | 7039271 | 983690  | ATG2 autophagy related 2 homolog A (S. cerevisiae) | Atg2a | 689688 | 1,03 | down |
| 6582279 | 7039271 | 983692  | ATG2 autophagy related 2 homolog A (S. cerevisiae) | Atg2a | 689688 | 1,39 | up   |
| 6590182 | 7039271 | 983688  | ATG2 autophagy related 2 homolog A (S. cerevisiae) | Atg2a | 689688 | 1,21 | down |
| 6604606 | 7039271 | 983703  | ATG2 autophagy related 2 homolog A (S. cerevisiae) | Atg2a | 689688 | 1,09 | up   |
| 6681696 | 7039271 | 983680  | ATG2 autophagy related 2 homolog A (S. cerevisiae) | Atg2a | 689688 | 1,15 | up   |
| 6694583 | 7039271 | 983716  | ATG2 autophagy related 2 homolog A (S. cerevisiae) | Atg2a | 689688 | 1,73 | down |
| 6723507 | 7039271 | 983717  | ATG2 autophagy related 2 homolog A (S. cerevisiae) | Atg2a | 689688 | 1,16 | up   |
| 5785627 | 7357890 | 1764397 | ATG4 autophagy related 4 homolog B (S. cerevisiae) | Atg4b | 316640 | 2,50 | down |
| 5834752 | 7357890 | 1764392 | ATG4 autophagy related 4 homolog B (S. cerevisiae) | Atg4b | 316640 | 1,55 | up   |
| 5888669 | 7357890 | 1764393 | ATG4 autophagy related 4 homolog B (S. cerevisiae) | Atg4b | 316640 | 1,37 | down |
| 6001208 | 7357890 | 1764397 | ATG4 autophagy related 4 homolog B (S. cerevisiae) | Atg4b | 316640 | 1,33 | up   |

|         |         |         |                                                    |       |        |      |      |
|---------|---------|---------|----------------------------------------------------|-------|--------|------|------|
| 6041078 | 7357890 | 1764396 | ATG4 autophagy related 4 homolog B (S. cerevisiae) | Atg4b | 316640 | 1,15 | up   |
| 6135531 | 7357890 | 1764397 | ATG4 autophagy related 4 homolog B (S. cerevisiae) | Atg4b | 316640 | 1,24 | up   |
| 6325913 | 7357890 | 1764391 | ATG4 autophagy related 4 homolog B (S. cerevisiae) | Atg4b | 316640 | 1,39 | up   |
| 6338624 | 7357890 | 1764394 | ATG4 autophagy related 4 homolog B (S. cerevisiae) | Atg4b | 316640 | 1,17 | down |
| 6415894 | 7357890 | 1764391 | ATG4 autophagy related 4 homolog B (S. cerevisiae) | Atg4b | 316640 | 1,10 | down |
| 6580185 | 7357890 | 1764397 | ATG4 autophagy related 4 homolog B (S. cerevisiae) | Atg4b | 316640 | 1,34 | down |
| 6682829 | 7357890 | 1764397 | ATG4 autophagy related 4 homolog B (S. cerevisiae) | Atg4b | 316640 | 1,10 | up   |
| 6719137 | 7357890 | 1764397 | ATG4 autophagy related 4 homolog B (S. cerevisiae) | Atg4b | 316640 | 1,40 | up   |
| 6732350 | 7357890 | 1764395 | ATG4 autophagy related 4 homolog B (S. cerevisiae) | Atg4b | 316640 | 1,22 | down |
| 5625507 | 7363911 | 1778844 | ATG9 autophagy related 9 homolog A (S. cerevisiae) | Atg9a | 363254 | 1,01 | up   |
| 5687723 | 7363911 | 1778838 | ATG9 autophagy related 9 homolog A (S. cerevisiae) | Atg9a | 363254 | 1,02 | down |
| 5693457 | 7363911 | 1778831 | ATG9 autophagy related 9 homolog A (S. cerevisiae) | Atg9a | 363254 | 1,05 | up   |
| 5701678 | 7363911 | 1778835 | ATG9 autophagy related 9 homolog A (S. cerevisiae) | Atg9a | 363254 | 1,01 | up   |
| 5777274 | 7363911 | 1778843 | ATG9 autophagy related 9 homolog A (S. cerevisiae) | Atg9a | 363254 | 1,04 | up   |
| 5826567 | 7363911 | 1778835 | ATG9 autophagy related 9 homolog A (S. cerevisiae) | Atg9a | 363254 | 1,15 | up   |
| 5873615 | 7363911 | 1778839 | ATG9 autophagy related 9 homolog A (S. cerevisiae) | Atg9a | 363254 | 1,04 | up   |
| 6048797 | 7363911 | 1778840 | ATG9 autophagy related 9 homolog A (S. cerevisiae) | Atg9a | 363254 | 1,22 | down |
| 6086900 | 7363911 | 1778845 | ATG9 autophagy related 9 homolog A (S. cerevisiae) | Atg9a | 363254 | 2,22 | down |
| 6088130 | 7363911 | 1778830 | ATG9 autophagy related 9 homolog A (S. cerevisiae) | Atg9a | 363254 | 1,22 | down |
| 6114506 | 7363911 | 1778833 | ATG9 autophagy related 9 homolog A (S. cerevisiae) | Atg9a | 363254 | 1,20 | up   |
| 6125266 | 7363911 | 1778845 | ATG9 autophagy related 9 homolog A (S. cerevisiae) | Atg9a | 363254 | 1,26 | up   |
| 6211923 | 7363911 | 1778834 | ATG9 autophagy related 9 homolog A (S. cerevisiae) | Atg9a | 363254 | 1,11 | up   |
| 6227055 | 7363911 | 1778838 | ATG9 autophagy related 9 homolog A (S. cerevisiae) | Atg9a | 363254 | 1,01 | down |
| 6241191 | 7363911 | 1778837 | ATG9 autophagy related 9 homolog A (S. cerevisiae) | Atg9a | 363254 | 1,06 | down |
| 6384575 | 7363911 | 1778841 | ATG9 autophagy related 9 homolog A (S. cerevisiae) | Atg9a | 363254 | 1,02 | up   |
| 6475634 | 7363911 | 1778843 | ATG9 autophagy related 9 homolog A (S. cerevisiae) | Atg9a | 363254 | 1,18 | up   |
| 6541991 | 7363911 | 1778836 | ATG9 autophagy related 9 homolog A (S. cerevisiae) | Atg9a | 363254 | 1,06 | up   |
| 6556616 | 7363911 | 1778842 | ATG9 autophagy related 9 homolog A (S. cerevisiae) | Atg9a | 363254 | 1,21 | down |
| 6636045 | 7363911 | 1778832 | ATG9 autophagy related 9 homolog A (S. cerevisiae) | Atg9a | 363254 | 1,16 | up   |
| 6667421 | 7363911 | 1778831 | ATG9 autophagy related 9 homolog A (S. cerevisiae) | Atg9a | 363254 | 1,06 | down |
| 5625236 | 7287337 | 1589988 | AT-hook transcription factor                       | Akna  | 362530 | 1,52 | up   |
| 5645468 | 7287337 | 1589990 | AT-hook transcription factor                       | Akna  | 362530 | 1,35 | up   |
| 5729785 | 7287337 | 1589994 | AT-hook transcription factor                       | Akna  | 362530 | 1,73 | down |
| 5751463 | 7287337 | 1589979 | AT-hook transcription factor                       | Akna  | 362530 | 1,40 | up   |
| 5821889 | 7287337 | 1589974 | AT-hook transcription factor                       | Akna  | 362530 | 1,01 | up   |
| 5838591 | 7287337 | 1589996 | AT-hook transcription factor                       | Akna  | 362530 | 2,50 | up   |
| 5864584 | 7287337 | 1589983 | AT-hook transcription factor                       | Akna  | 362530 | 1,75 | down |
| 5866648 | 7287337 | 1589997 | AT-hook transcription factor                       | Akna  | 362530 | 2,22 | down |
| 5942283 | 7287337 | 1589987 | AT-hook transcription factor                       | Akna  | 362530 | 1,17 | up   |
| 6000745 | 7287337 | 1589975 | AT-hook transcription factor                       | Akna  | 362530 | 1,54 | down |
| 6016620 | 7287337 | 1589971 | AT-hook transcription factor                       | Akna  | 362530 | 1,48 | up   |
| 6072461 | 7287337 | 1589987 | AT-hook transcription factor                       | Akna  | 362530 | 1,95 | up   |
| 6120194 | 7287337 | 1589993 | AT-hook transcription factor                       | Akna  | 362530 | 2,08 | up   |
| 6163202 | 7287337 | 1589986 | AT-hook transcription factor                       | Akna  | 362530 | 1,15 | up   |
| 6190516 | 7287337 | 1589969 | AT-hook transcription factor                       | Akna  | 362530 | 1,63 | down |
| 6199863 | 7287337 | 1589977 | AT-hook transcription factor                       | Akna  | 362530 | 1,53 | up   |
| 6206377 | 7287337 | 1589996 | AT-hook transcription factor                       | Akna  | 362530 | 1,26 | up   |
| 6222446 | 7287337 | 1589994 | AT-hook transcription factor                       | Akna  | 362530 | 1,45 | up   |
| 6303469 | 7287337 | 1589990 | AT-hook transcription factor                       | Akna  | 362530 | 1,90 | up   |
| 6331168 | 7287337 | 1589980 | AT-hook transcription factor                       | Akna  | 362530 | 1,53 | up   |
| 6346685 | 7287337 | 1589969 | AT-hook transcription factor                       | Akna  | 362530 | 1,36 | up   |
| 6386896 | 7287337 | 1589973 | AT-hook transcription factor                       | Akna  | 362530 | 1,15 | down |
| 6394658 | 7287337 | 1589994 | AT-hook transcription factor                       | Akna  | 362530 | 3,51 | up   |
| 6488379 | 7287337 | 1589994 | AT-hook transcription factor                       | Akna  | 362530 | 1,19 | up   |
| 6522448 | 7287337 | 1589982 | AT-hook transcription factor                       | Akna  | 362530 | 1,30 | up   |
| 6539870 | 7287337 | 1589984 | AT-hook transcription factor                       | Akna  | 362530 | 1,86 | down |

|         |         |         |                                |         |        |      |      |
|---------|---------|---------|--------------------------------|---------|--------|------|------|
| 6573001 | 7287337 | 1589972 | AT-hook transcription factor   | Akna    | 362530 | 1,80 | down |
| 6640918 | 7287337 | 1589971 | AT-hook transcription factor   | Akna    | 362530 | 1,58 | up   |
| 6711280 | 7287337 | 1589992 | AT-hook transcription factor   | Akna    | 362530 | 2,11 | up   |
| 6744974 | 7287337 | 1589990 | AT-hook transcription factor   | Akna    | 362530 | 1,26 | up   |
| 5775623 | 7181442 | 1328886 | ATM interactor                 | Atmin   | 315037 | 1,07 | up   |
| 5823051 | 7181442 | 1328886 | ATM interactor                 | Atmin   | 315037 | 1,07 | down |
| 6404385 | 7181442 | 1328886 | ATM interactor                 | Atmin   | 315037 | 1,18 | up   |
| 6660795 | 7181442 | 1328886 | ATM interactor                 | Atmin   | 315037 | 1,34 | up   |
| 5618140 | 7155116 | 1263405 | ATP/GTP binding protein 1      | Agtppb1 | 290986 | 1,04 | down |
| 5673188 | 7155116 | 1263417 | ATP/GTP binding protein 1      | Agtppb1 | 290986 | 1,01 | up   |
| 5731357 | 7155116 | 1263394 | ATP/GTP binding protein 1      | Agtppb1 | 290986 | 1,19 | up   |
| 5758259 | 7155116 | 1263427 | ATP/GTP binding protein 1      | Agtppb1 | 290986 | 1,16 | down |
| 5790687 | 7155116 | 1263401 | ATP/GTP binding protein 1      | Agtppb1 | 290986 | 1,19 | up   |
| 5873509 | 7155116 | 1263399 | ATP/GTP binding protein 1      | Agtppb1 | 290986 | 1,04 | up   |
| 5912424 | 7155116 | 1263398 | ATP/GTP binding protein 1      | Agtppb1 | 290986 | 1,13 | up   |
| 5916001 | 7155116 | 1263424 | ATP/GTP binding protein 1      | Agtppb1 | 290986 | 1,05 | down |
| 5976704 | 7155116 | 1263431 | ATP/GTP binding protein 1      | Agtppb1 | 290986 | 1,28 | down |
| 6006334 | 7155116 | 1263410 | ATP/GTP binding protein 1      | Agtppb1 | 290986 | 1,01 | up   |
| 6049599 | 7155116 | 1263442 | ATP/GTP binding protein 1      | Agtppb1 | 290986 | 1,10 | down |
| 6132197 | 7155116 | 1263405 | ATP/GTP binding protein 1      | Agtppb1 | 290986 | 1,09 | up   |
| 6134142 | 7155116 | 1263423 | ATP/GTP binding protein 1      | Agtppb1 | 290986 | 1,15 | down |
| 6188706 | 7155116 | 1263416 | ATP/GTP binding protein 1      | Agtppb1 | 290986 | 1,19 | up   |
| 6228486 | 7155116 | 1263443 | ATP/GTP binding protein 1      | Agtppb1 | 290986 | 1,68 | down |
| 6235048 | 7155116 | 1263415 | ATP/GTP binding protein 1      | Agtppb1 | 290986 | 1,11 | up   |
| 6248300 | 7155116 | 1263439 | ATP/GTP binding protein 1      | Agtppb1 | 290986 | 1,15 | down |
| 6263411 | 7155116 | 1263391 | ATP/GTP binding protein 1      | Agtppb1 | 290986 | 1,10 | up   |
| 6306284 | 7155116 | 1263413 | ATP/GTP binding protein 1      | Agtppb1 | 290986 | 1,03 | down |
| 6347335 | 7155116 | 1263412 | ATP/GTP binding protein 1      | Agtppb1 | 290986 | 1,01 | up   |
| 6426612 | 7155116 | 1263390 | ATP/GTP binding protein 1      | Agtppb1 | 290986 | 1,46 | up   |
| 6439384 | 7155116 | 1263391 | ATP/GTP binding protein 1      | Agtppb1 | 290986 | 1,16 | up   |
| 6459082 | 7155116 | 1263397 | ATP/GTP binding protein 1      | Agtppb1 | 290986 | 1,09 | down |
| 6537997 | 7155116 | 1263443 | ATP/GTP binding protein 1      | Agtppb1 | 290986 | 1,73 | down |
| 6550758 | 7155116 | 1263406 | ATP/GTP binding protein 1      | Agtppb1 | 290986 | 1,12 | down |
| 6567658 | 7155116 | 1263443 | ATP/GTP binding protein 1      | Agtppb1 | 290986 | 2,03 | down |
| 6591373 | 7155116 | 1263421 | ATP/GTP binding protein 1      | Agtppb1 | 290986 | 1,38 | down |
| 6665469 | 7155116 | 1263404 | ATP/GTP binding protein 1      | Agtppb1 | 290986 | 1,39 | up   |
| 6671437 | 7155116 | 1263440 | ATP/GTP binding protein 1      | Agtppb1 | 290986 | 1,59 | down |
| 6682337 | 7155116 | 1263400 | ATP/GTP binding protein 1      | Agtppb1 | 290986 | 1,11 | up   |
| 6692730 | 7155116 | 1263406 | ATP/GTP binding protein 1      | Agtppb1 | 290986 | 1,07 | up   |
| 6701266 | 7155116 | 1263401 | ATP/GTP binding protein 1      | Agtppb1 | 290986 | 1,36 | up   |
| 6733976 | 7155116 | 1263422 | ATP/GTP binding protein 1      | Agtppb1 | 290986 | 1,18 | down |
| 6742351 | 7155116 | 1263392 | ATP/GTP binding protein 1      | Agtppb1 | 290986 | 1,06 | up   |
| 6371491 | 7229886 | 1447165 | ATP/GTP binding protein-like 2 | Agbl2   | 366124 | 1,00 | up   |
| 6515388 | 7229886 | 1447145 | ATP/GTP binding protein-like 2 | Agbl2   | 366124 | 1,37 | up   |
| 5627790 | 7281077 | 1575560 | ATPase type 13A2               | Atp13a2 | 362645 | 1,05 | down |
| 5638868 | 7281077 | 1575562 | ATPase type 13A2               | Atp13a2 | 362645 | 1,07 | down |
| 5661805 | 7281077 | 1575544 | ATPase type 13A2               | Atp13a2 | 362645 | 1,15 | down |
| 5664913 | 7281077 | 1575543 | ATPase type 13A2               | Atp13a2 | 362645 | 1,13 | down |
| 5665679 | 7281077 | 1575550 | ATPase type 13A2               | Atp13a2 | 362645 | 1,33 | down |
| 5720170 | 7281077 | 1575558 | ATPase type 13A2               | Atp13a2 | 362645 | 1,05 | down |
| 5723679 | 7281077 | 1575549 | ATPase type 13A2               | Atp13a2 | 362645 | 1,04 | down |
| 5752093 | 7281077 | 1575552 | ATPase type 13A2               | Atp13a2 | 362645 | 1,29 | down |
| 5824014 | 7281077 | 1575545 | ATPase type 13A2               | Atp13a2 | 362645 | 1,12 | down |
| 5842197 | 7281077 | 1575555 | ATPase type 13A2               | Atp13a2 | 362645 | 1,05 | up   |
| 5849590 | 7281077 | 1575557 | ATPase type 13A2               | Atp13a2 | 362645 | 1,23 | up   |
| 5872877 | 7281077 | 1575554 | ATPase type 13A2               | Atp13a2 | 362645 | 1,07 | up   |



|         |         |         |                                                                          |         |        |      |      |
|---------|---------|---------|--------------------------------------------------------------------------|---------|--------|------|------|
| 5964814 | 7281077 | 1575562 | ATPase type 13A2                                                         | Atp13a2 | 362645 | 1,49 | down |
| 6016474 | 7281077 | 1575547 | ATPase type 13A2                                                         | Atp13a2 | 362645 | 1,22 | up   |
| 6071720 | 7281077 | 1575546 | ATPase type 13A2                                                         | Atp13a2 | 362645 | 1,06 | up   |
| 6163139 | 7281077 | 1575555 | ATPase type 13A2                                                         | Atp13a2 | 362645 | 1,17 | down |
| 6179177 | 7281077 | 1575548 | ATPase type 13A2                                                         | Atp13a2 | 362645 | 1,06 | up   |
| 6188052 | 7281077 | 1575564 | ATPase type 13A2                                                         | Atp13a2 | 362645 | 1,26 | down |
| 6198223 | 7281077 | 1575562 | ATPase type 13A2                                                         | Atp13a2 | 362645 | 1,03 | up   |
| 6335574 | 7281077 | 1575540 | ATPase type 13A2                                                         | Atp13a2 | 362645 | 1,37 | up   |
| 6344339 | 7281077 | 1575559 | ATPase type 13A2                                                         | Atp13a2 | 362645 | 1,63 | down |
| 6354673 | 7281077 | 1575563 | ATPase type 13A2                                                         | Atp13a2 | 362645 | 1,07 | down |
| 6400215 | 7281077 | 1575551 | ATPase type 13A2                                                         | Atp13a2 | 362645 | 1,14 | up   |
| 6474479 | 7281077 | 1575565 | ATPase type 13A2                                                         | Atp13a2 | 362645 | 1,11 | down |
| 6527223 | 7281077 | 1575564 | ATPase type 13A2                                                         | Atp13a2 | 362645 | 2,29 | down |
| 6530902 | 7281077 | 1575553 | ATPase type 13A2                                                         | Atp13a2 | 362645 | 1,03 | down |
| 6571421 | 7281077 | 1575561 | ATPase type 13A2                                                         | Atp13a2 | 362645 | 1,17 | up   |
| 6597800 | 7281077 | 1575541 | ATPase type 13A2                                                         | Atp13a2 | 362645 | 1,02 | up   |
| 6603925 | 7281077 | 1575542 | ATPase type 13A2                                                         | Atp13a2 | 362645 | 1,41 | up   |
| 6648364 | 7281077 | 1575556 | ATPase type 13A2                                                         | Atp13a2 | 362645 | 1,60 | up   |
| 5643586 | 7118356 | 1173141 | ATPase, aminophospholipid transporter (APLT), class I, type 8A, member 1 | Atp8a1  | 289615 | 1,30 | up   |
| 5699954 | 7118356 | 1173152 | ATPase, aminophospholipid transporter (APLT), class I, type 8A, member 1 | Atp8a1  | 289615 | 1,06 | down |
| 5713034 | 7118356 | 1173198 | ATPase, aminophospholipid transporter (APLT), class I, type 8A, member 1 | Atp8a1  | 289615 | 1,04 | down |
| 5745366 | 7118356 | 1173137 | ATPase, aminophospholipid transporter (APLT), class I, type 8A, member 1 | Atp8a1  | 289615 | 1,02 | down |
| 5776234 | 7118356 | 1173155 | ATPase, aminophospholipid transporter (APLT), class I, type 8A, member 1 | Atp8a1  | 289615 | 1,53 | up   |
| 5800853 | 7118356 | 1173165 | ATPase, aminophospholipid transporter (APLT), class I, type 8A, member 1 | Atp8a1  | 289615 | 1,10 | up   |
| 5855460 | 7118356 | 1173105 | ATPase, aminophospholipid transporter (APLT), class I, type 8A, member 1 | Atp8a1  | 289615 | 1,13 | down |
| 5922432 | 7118356 | 1173105 | ATPase, aminophospholipid transporter (APLT), class I, type 8A, member 1 | Atp8a1  | 289615 | 1,29 | up   |
| 5966415 | 7118356 | 1173131 | ATPase, aminophospholipid transporter (APLT), class I, type 8A, member 1 | Atp8a1  | 289615 | 1,47 | up   |
| 5971396 | 7118356 | 1173138 | ATPase, aminophospholipid transporter (APLT), class I, type 8A, member 1 | Atp8a1  | 289615 | 1,18 | up   |
| 5983779 | 7118356 | 1173202 | ATPase, aminophospholipid transporter (APLT), class I, type 8A, member 1 | Atp8a1  | 289615 | 1,22 | down |
| 5984886 | 7118356 | 1173197 | ATPase, aminophospholipid transporter (APLT), class I, type 8A, member 1 | Atp8a1  | 289615 | 1,24 | up   |
| 6012767 | 7118356 | 1173149 | ATPase, aminophospholipid transporter (APLT), class I, type 8A, member 1 | Atp8a1  | 289615 | 2,02 | up   |
| 6056022 | 7118356 | 1173127 | ATPase, aminophospholipid transporter (APLT), class I, type 8A, member 1 | Atp8a1  | 289615 | 1,34 | up   |
| 6059569 | 7118356 | 1173172 | ATPase, aminophospholipid transporter (APLT), class I, type 8A, member 1 | Atp8a1  | 289615 | 1,15 | down |
| 6064249 | 7118356 | 1173143 | ATPase, aminophospholipid transporter (APLT), class I, type 8A, member 1 | Atp8a1  | 289615 | 1,02 | down |
| 6094155 | 7118356 | 1173189 | ATPase, aminophospholipid transporter (APLT), class I, type 8A, member 1 | Atp8a1  | 289615 | 1,05 | up   |
| 6097102 | 7118356 | 1173134 | ATPase, aminophospholipid transporter (APLT), class I, type 8A, member 1 | Atp8a1  | 289615 | 1,20 | down |
| 6132279 | 7118356 | 1173119 | ATPase, aminophospholipid transporter (APLT), class I, type 8A, member 1 | Atp8a1  | 289615 | 1,34 | up   |
| 6164612 | 7118356 | 1173188 | ATPase, aminophospholipid transporter (APLT), class I, type 8A, member 1 | Atp8a1  | 289615 | 1,02 | down |
| 6194701 | 7118356 | 1173187 | ATPase, aminophospholipid transporter (APLT), class I, type 8A, member 1 | Atp8a1  | 289615 | 1,02 | up   |
| 6235880 | 7118356 | 1173182 | ATPase, aminophospholipid transporter (APLT), class I, type 8A, member 1 | Atp8a1  | 289615 | 1,39 | down |
| 6247124 | 7118356 | 1173147 | ATPase, aminophospholipid transporter (APLT), class I, type 8A, member 1 | Atp8a1  | 289615 | 1,15 | down |
| 6281637 | 7118356 | 1173157 | ATPase, aminophospholipid transporter (APLT), class I, type 8A, member 1 | Atp8a1  | 289615 | 1,00 | up   |
| 6316818 | 7118356 | 1173116 | ATPase, aminophospholipid transporter (APLT), class I, type 8A, member 1 | Atp8a1  | 289615 | 1,22 | down |
| 6317605 | 7118356 | 1173157 | ATPase, aminophospholipid transporter (APLT), class I, type 8A, member 1 | Atp8a1  | 289615 | 1,18 | down |
| 6327251 | 7118356 | 1173177 | ATPase, aminophospholipid transporter (APLT), class I, type 8A, member 1 | Atp8a1  | 289615 | 1,04 | down |
| 6409665 | 7118356 | 1173117 | ATPase, aminophospholipid transporter (APLT), class I, type 8A, member 1 | Atp8a1  | 289615 | 1,52 | down |
| 6445329 | 7118356 | 1173133 | ATPase, aminophospholipid transporter (APLT), class I, type 8A, member 1 | Atp8a1  | 289615 | 1,15 | up   |
| 6468631 | 7118356 | 1173106 | ATPase, aminophospholipid transporter (APLT), class I, type 8A, member 1 | Atp8a1  | 289615 | 1,06 | up   |
| 6487794 | 7118356 | 1173142 | ATPase, aminophospholipid transporter (APLT), class I, type 8A, member 1 | Atp8a1  | 289615 | 1,14 | up   |
| 6492330 | 7118356 | 1173181 | ATPase, aminophospholipid transporter (APLT), class I, type 8A, member 1 | Atp8a1  | 289615 | 1,05 | up   |
| 6517094 | 7118356 | 1173146 | ATPase, aminophospholipid transporter (APLT), class I, type 8A, member 1 | Atp8a1  | 289615 | 1,07 | down |
| 6605005 | 7118356 | 1173201 | ATPase, aminophospholipid transporter (APLT), class I, type 8A, member 1 | Atp8a1  | 289615 | 1,06 | down |
| 6613573 | 7118356 | 1173118 | ATPase, aminophospholipid transporter (APLT), class I, type 8A, member 1 | Atp8a1  | 289615 | 1,10 | up   |
| 6621609 | 7118356 | 1173183 | ATPase, aminophospholipid transporter (APLT), class I, type 8A, member 1 | Atp8a1  | 289615 | 1,02 | down |
| 6642127 | 7118356 | 1173167 | ATPase, aminophospholipid transporter (APLT), class I, type 8A, member 1 | Atp8a1  | 289615 | 1,07 | up   |
| 6674531 | 7118356 | 1173139 | ATPase, aminophospholipid transporter (APLT), class I, type 8A, member 1 | Atp8a1  | 289615 | 1,24 | up   |

|         |         |         |                                                                          |        |        |      |      |
|---------|---------|---------|--------------------------------------------------------------------------|--------|--------|------|------|
| 6682168 | 7118356 | 1173148 | ATPase, aminophospholipid transporter (APLT), class I, type 8A, member 1 | Atp8a1 | 289615 | 1,06 | up   |
| 6689366 | 7118356 | 1173178 | ATPase, aminophospholipid transporter (APLT), class I, type 8A, member 1 | Atp8a1 | 289615 | 1,16 | up   |
| 6699121 | 7118356 | 1173158 | ATPase, aminophospholipid transporter (APLT), class I, type 8A, member 1 | Atp8a1 | 289615 | 1,02 | down |
| 5649256 | 7268482 | 1543721 | ATPase, Ca++ transporting, plasma membrane 2                             | Atp2b2 | 24215  | 1,07 | down |
| 5651753 | 7268482 | 1543717 | ATPase, Ca++ transporting, plasma membrane 2                             | Atp2b2 | 24215  | 1,02 | down |
| 5677600 | 7268482 | 1543720 | ATPase, Ca++ transporting, plasma membrane 2                             | Atp2b2 | 24215  | 1,63 | up   |
| 5727345 | 7268482 | 1543712 | ATPase, Ca++ transporting, plasma membrane 2                             | Atp2b2 | 24215  | 1,01 | down |
| 5728221 | 7268482 | 1543713 | ATPase, Ca++ transporting, plasma membrane 2                             | Atp2b2 | 24215  | 1,17 | down |
| 5832200 | 7268482 | 1543704 | ATPase, Ca++ transporting, plasma membrane 2                             | Atp2b2 | 24215  | 1,20 | up   |
| 5865789 | 7268482 | 1543722 | ATPase, Ca++ transporting, plasma membrane 2                             | Atp2b2 | 24215  | 3,33 | up   |
| 5885728 | 7268482 | 1543705 | ATPase, Ca++ transporting, plasma membrane 2                             | Atp2b2 | 24215  | 1,27 | down |
| 5912570 | 7268482 | 1543716 | ATPase, Ca++ transporting, plasma membrane 2                             | Atp2b2 | 24215  | 1,35 | down |
| 6025041 | 7268482 | 1543719 | ATPase, Ca++ transporting, plasma membrane 2                             | Atp2b2 | 24215  | 1,74 | up   |
| 6082423 | 7268482 | 1543718 | ATPase, Ca++ transporting, plasma membrane 2                             | Atp2b2 | 24215  | 1,16 | down |
| 6190575 | 7268482 | 1543706 | ATPase, Ca++ transporting, plasma membrane 2                             | Atp2b2 | 24215  | 1,25 | down |
| 6264907 | 7268482 | 1543708 | ATPase, Ca++ transporting, plasma membrane 2                             | Atp2b2 | 24215  | 1,06 | up   |
| 6265406 | 7268482 | 1543715 | ATPase, Ca++ transporting, plasma membrane 2                             | Atp2b2 | 24215  | 1,09 | up   |
| 6360152 | 7268482 | 1543702 | ATPase, Ca++ transporting, plasma membrane 2                             | Atp2b2 | 24215  | 1,26 | down |
| 6366295 | 7268482 | 1543707 | ATPase, Ca++ transporting, plasma membrane 2                             | Atp2b2 | 24215  | 1,16 | up   |
| 6511693 | 7268482 | 1543701 | ATPase, Ca++ transporting, plasma membrane 2                             | Atp2b2 | 24215  | 1,18 | down |
| 6518671 | 7268482 | 1543719 | ATPase, Ca++ transporting, plasma membrane 2                             | Atp2b2 | 24215  | 1,23 | up   |
| 6614619 | 7268482 | 1543703 | ATPase, Ca++ transporting, plasma membrane 2                             | Atp2b2 | 24215  | 1,33 | down |
| 6665168 | 7268482 | 1543709 | ATPase, Ca++ transporting, plasma membrane 2                             | Atp2b2 | 24215  | 1,13 | up   |
| 6703548 | 7268482 | 1543714 | ATPase, Ca++ transporting, plasma membrane 2                             | Atp2b2 | 24215  | 1,11 | down |
| 6715251 | 7268482 | 1543710 | ATPase, Ca++ transporting, plasma membrane 2                             | Atp2b2 | 24215  | 1,18 | down |
| 6738498 | 7268482 | 1543711 | ATPase, Ca++ transporting, plasma membrane 2                             | Atp2b2 | 24215  | 1,06 | up   |
| 5630298 | 7111227 | 1155325 | ATPase, Ca++ transporting, plasma membrane 4                             | Atp2b4 | 29600  | 1,04 | down |
| 5690712 | 7111227 | 1155335 | ATPase, Ca++ transporting, plasma membrane 4                             | Atp2b4 | 29600  | 1,06 | down |
| 5729789 | 7111227 | 1155327 | ATPase, Ca++ transporting, plasma membrane 4                             | Atp2b4 | 29600  | 2,41 | up   |
| 5882711 | 7111227 | 1155321 | ATPase, Ca++ transporting, plasma membrane 4                             | Atp2b4 | 29600  | 1,03 | down |
| 5944034 | 7111227 | 1155331 | ATPase, Ca++ transporting, plasma membrane 4                             | Atp2b4 | 29600  | 1,37 | down |
| 5964649 | 7111227 | 1155319 | ATPase, Ca++ transporting, plasma membrane 4                             | Atp2b4 | 29600  | 1,66 | down |
| 6073477 | 7111227 | 1155334 | ATPase, Ca++ transporting, plasma membrane 4                             | Atp2b4 | 29600  | 1,02 | up   |
| 6096368 | 7111227 | 1155328 | ATPase, Ca++ transporting, plasma membrane 4                             | Atp2b4 | 29600  | 1,11 | down |
| 6126454 | 7111227 | 1155333 | ATPase, Ca++ transporting, plasma membrane 4                             | Atp2b4 | 29600  | 1,24 | up   |
| 6145303 | 7111227 | 1155322 | ATPase, Ca++ transporting, plasma membrane 4                             | Atp2b4 | 29600  | 1,02 | up   |
| 6153389 | 7111227 | 1155330 | ATPase, Ca++ transporting, plasma membrane 4                             | Atp2b4 | 29600  | 1,28 | up   |
| 6157677 | 7111227 | 1155323 | ATPase, Ca++ transporting, plasma membrane 4                             | Atp2b4 | 29600  | 1,13 | up   |
| 6242569 | 7111227 | 1155324 | ATPase, Ca++ transporting, plasma membrane 4                             | Atp2b4 | 29600  | 1,10 | up   |
| 6289234 | 7111227 | 1155335 | ATPase, Ca++ transporting, plasma membrane 4                             | Atp2b4 | 29600  | 1,14 | up   |
| 6376341 | 7111227 | 1155317 | ATPase, Ca++ transporting, plasma membrane 4                             | Atp2b4 | 29600  | 1,10 | down |
| 6420961 | 7111227 | 1155336 | ATPase, Ca++ transporting, plasma membrane 4                             | Atp2b4 | 29600  | 1,39 | up   |
| 6431738 | 7111227 | 1155318 | ATPase, Ca++ transporting, plasma membrane 4                             | Atp2b4 | 29600  | 1,25 | up   |
| 6449186 | 7111227 | 1155317 | ATPase, Ca++ transporting, plasma membrane 4                             | Atp2b4 | 29600  | 1,10 | down |
| 6544634 | 7111227 | 1155329 | ATPase, Ca++ transporting, plasma membrane 4                             | Atp2b4 | 29600  | 1,22 | up   |
| 6544666 | 7111227 | 1155326 | ATPase, Ca++ transporting, plasma membrane 4                             | Atp2b4 | 29600  | 1,07 | down |
| 6647614 | 7111227 | 1155318 | ATPase, Ca++ transporting, plasma membrane 4                             | Atp2b4 | 29600  | 1,24 | up   |
| 6726948 | 7111227 | 1155320 | ATPase, Ca++ transporting, plasma membrane 4                             | Atp2b4 | 29600  | 1,33 | down |
| 6729959 | 7111227 | 1155332 | ATPase, Ca++ transporting, plasma membrane 4                             | Atp2b4 | 29600  | 1,12 | up   |
| 5703750 | 7032204 | 966173  | ATPase, class V, type 10A                                                | Atp10a | 365266 | 1,20 | down |
| 5730159 | 7032204 | 966173  | ATPase, class V, type 10A                                                | Atp10a | 365266 | 1,08 | up   |
| 5806654 | 7032204 | 966155  | ATPase, class V, type 10A                                                | Atp10a | 365266 | 1,23 | down |
| 5867930 | 7032204 | 966172  | ATPase, class V, type 10A                                                | Atp10a | 365266 | 2,37 | up   |
| 5891271 | 7032204 | 966162  | ATPase, class V, type 10A                                                | Atp10a | 365266 | 1,07 | down |
| 5953151 | 7032204 | 966170  | ATPase, class V, type 10A                                                | Atp10a | 365266 | 1,25 | down |
| 5956503 | 7032204 | 966161  | ATPase, class V, type 10A                                                | Atp10a | 365266 | 1,12 | up   |

|         |         |         |                                                |         |        |      |      |
|---------|---------|---------|------------------------------------------------|---------|--------|------|------|
| 5979348 | 7032204 | 966157  | ATPase, class V, type 10A                      | Atp10a  | 365266 | 1,00 | down |
| 6036438 | 7032204 | 966120  | ATPase, class V, type 10A                      | Atp10a  | 365266 | 1,37 | down |
| 6219227 | 7032204 | 966163  | ATPase, class V, type 10A                      | Atp10a  | 365266 | 2,09 | up   |
| 6303552 | 7032204 | 966167  | ATPase, class V, type 10A                      | Atp10a  | 365266 | 1,35 | up   |
| 6307143 | 7032204 | 966166  | ATPase, class V, type 10A                      | Atp10a  | 365266 | 1,22 | up   |
| 6476797 | 7032204 | 966169  | ATPase, class V, type 10A                      | Atp10a  | 365266 | 1,02 | up   |
| 6575634 | 7032204 | 966173  | ATPase, class V, type 10A                      | Atp10a  | 365266 | 1,55 | up   |
| 6602293 | 7032204 | 966165  | ATPase, class V, type 10A                      | Atp10a  | 365266 | 1,11 | up   |
| 6700789 | 7032204 | 966160  | ATPase, class V, type 10A                      | Atp10a  | 365266 | 1,03 | up   |
| 6732174 | 7032204 | 966164  | ATPase, class V, type 10A                      | Atp10a  | 365266 | 1,04 | down |
| 5662550 | 7125160 | 1189597 | ATPase, class V, type 10D                      | Atp10d  | 360932 | 1,54 | down |
| 5670029 | 7125160 | 1189583 | ATPase, class V, type 10D                      | Atp10d  | 360932 | 1,08 | down |
| 5694889 | 7125160 | 1189564 | ATPase, class V, type 10D                      | Atp10d  | 360932 | 1,17 | down |
| 5723715 | 7125160 | 1189570 | ATPase, class V, type 10D                      | Atp10d  | 360932 | 3,03 | down |
| 5725193 | 7125160 | 1189585 | ATPase, class V, type 10D                      | Atp10d  | 360932 | 1,05 | down |
| 5754981 | 7125160 | 1189600 | ATPase, class V, type 10D                      | Atp10d  | 360932 | 1,13 | up   |
| 5774907 | 7125160 | 1189595 | ATPase, class V, type 10D                      | Atp10d  | 360932 | 1,15 | up   |
| 5793860 | 7125160 | 1189577 | ATPase, class V, type 10D                      | Atp10d  | 360932 | 1,01 | down |
| 5949922 | 7125160 | 1189564 | ATPase, class V, type 10D                      | Atp10d  | 360932 | 1,05 | up   |
| 5979015 | 7125160 | 1189564 | ATPase, class V, type 10D                      | Atp10d  | 360932 | 1,23 | up   |
| 6013490 | 7125160 | 1189582 | ATPase, class V, type 10D                      | Atp10d  | 360932 | 1,02 | down |
| 6028222 | 7125160 | 1189574 | ATPase, class V, type 10D                      | Atp10d  | 360932 | 1,58 | down |
| 6187294 | 7125160 | 1189592 | ATPase, class V, type 10D                      | Atp10d  | 360932 | 1,05 | up   |
| 6212698 | 7125160 | 1189564 | ATPase, class V, type 10D                      | Atp10d  | 360932 | 1,29 | up   |
| 6266279 | 7125160 | 1189565 | ATPase, class V, type 10D                      | Atp10d  | 360932 | 1,07 | up   |
| 6320627 | 7125160 | 1189590 | ATPase, class V, type 10D                      | Atp10d  | 360932 | 1,24 | up   |
| 6349091 | 7125160 | 1189589 | ATPase, class V, type 10D                      | Atp10d  | 360932 | 1,01 | up   |
| 6356083 | 7125160 | 1189569 | ATPase, class V, type 10D                      | Atp10d  | 360932 | 1,32 | down |
| 6359482 | 7125160 | 1189590 | ATPase, class V, type 10D                      | Atp10d  | 360932 | 1,74 | up   |
| 6362148 | 7125160 | 1189600 | ATPase, class V, type 10D                      | Atp10d  | 360932 | 1,68 | down |
| 6385871 | 7125160 | 1189574 | ATPase, class V, type 10D                      | Atp10d  | 360932 | 1,39 | down |
| 6399667 | 7125160 | 1189597 | ATPase, class V, type 10D                      | Atp10d  | 360932 | 1,46 | up   |
| 6406755 | 7125160 | 1189576 | ATPase, class V, type 10D                      | Atp10d  | 360932 | 1,33 | down |
| 6437102 | 7125160 | 1189586 | ATPase, class V, type 10D                      | Atp10d  | 360932 | 1,26 | down |
| 6456833 | 7125160 | 1189588 | ATPase, class V, type 10D                      | Atp10d  | 360932 | 1,45 | up   |
| 6465442 | 7125160 | 1189600 | ATPase, class V, type 10D                      | Atp10d  | 360932 | 1,27 | down |
| 6528964 | 7125160 | 1189575 | ATPase, class V, type 10D                      | Atp10d  | 360932 | 1,01 | down |
| 6599721 | 7125160 | 1189567 | ATPase, class V, type 10D                      | Atp10d  | 360932 | 2,48 | down |
| 6655406 | 7125160 | 1189607 | ATPase, class V, type 10D                      | Atp10d  | 360932 | 1,42 | up   |
| 6675417 | 7125160 | 1189580 | ATPase, class V, type 10D                      | Atp10d  | 360932 | 1,16 | up   |
| 6675621 | 7125160 | 1189584 | ATPase, class V, type 10D                      | Atp10d  | 360932 | 1,27 | down |
| 6712648 | 7125160 | 1189599 | ATPase, class V, type 10D                      | Atp10d  | 360932 | 1,76 | up   |
| 6184554 | 7193056 | 1358280 | ATPase, class VI, type 11B                     | Atp11b  | 361929 | 1,22 | down |
| 6264174 | 7193056 | 1358279 | ATPase, class VI, type 11B                     | Atp11b  | 361929 | 1,42 | down |
| 6299856 | 7193056 | 1358287 | ATPase, class VI, type 11B                     | Atp11b  | 361929 | 1,14 | down |
| 6308707 | 7193056 | 1358278 | ATPase, class VI, type 11B                     | Atp11b  | 361929 | 1,22 | down |
| 6359041 | 7193056 | 1358284 | ATPase, class VI, type 11B                     | Atp11b  | 361929 | 1,31 | down |
| 6583720 | 7193056 | 1358280 | ATPase, class VI, type 11B                     | Atp11b  | 361929 | 1,17 | down |
| 6743193 | 7193056 | 1358287 | ATPase, class VI, type 11B                     | Atp11b  | 361929 | 2,02 | down |
| 5946554 | 7384509 | 1830719 | Atpase, class VI, type 11C                     | Atp11c  | 317599 | 1,17 | up   |
| 5955119 | 7384509 | 1830719 | Atpase, class VI, type 11C                     | Atp11c  | 317599 | 1,11 | down |
| 6462012 | 7384509 | 1830719 | Atpase, class VI, type 11C                     | Atp11c  | 317599 | 1,03 | down |
| 6595229 | 7384509 | 1830719 | Atpase, class VI, type 11C                     | Atp11c  | 317599 | 1,72 | down |
| 6216433 | 7252053 | 1502533 | ATPase, H transporting, lysosomal V1 subunit F | Atp6v1f | 116664 | 1,12 | down |
| 6248759 | 7252053 | 1502531 | ATPase, H transporting, lysosomal V1 subunit F | Atp6v1f | 116664 | 2,33 | down |
| 6562561 | 7252053 | 1502532 | ATPase, H transporting, lysosomal V1 subunit F | Atp6v1f | 116664 | 1,25 | up   |

|         |         |         |                                                     |        |        |      |      |
|---------|---------|---------|-----------------------------------------------------|--------|--------|------|------|
| 5634909 | 7048865 | 1007255 | ATPase, Na+/K+ transporting, alpha 3 polypeptide    | Atp1a3 | 24213  | 1,12 | up   |
| 5750826 | 7048865 | 1007273 | ATPase, Na+/K+ transporting, alpha 3 polypeptide    | Atp1a3 | 24213  | 1,84 | down |
| 5805381 | 7048865 | 1007274 | ATPase, Na+/K+ transporting, alpha 3 polypeptide    | Atp1a3 | 24213  | 1,16 | down |
| 5922708 | 7048865 | 1007260 | ATPase, Na+/K+ transporting, alpha 3 polypeptide    | Atp1a3 | 24213  | 1,12 | down |
| 5997412 | 7048865 | 1007262 | ATPase, Na+/K+ transporting, alpha 3 polypeptide    | Atp1a3 | 24213  | 1,54 | up   |
| 6036626 | 7048865 | 1007266 | ATPase, Na+/K+ transporting, alpha 3 polypeptide    | Atp1a3 | 24213  | 1,01 | down |
| 6101860 | 7048865 | 1007259 | ATPase, Na+/K+ transporting, alpha 3 polypeptide    | Atp1a3 | 24213  | 1,21 | up   |
| 6179442 | 7048865 | 1007256 | ATPase, Na+/K+ transporting, alpha 3 polypeptide    | Atp1a3 | 24213  | 1,31 | up   |
| 6225254 | 7048865 | 1007271 | ATPase, Na+/K+ transporting, alpha 3 polypeptide    | Atp1a3 | 24213  | 1,63 | down |
| 6248700 | 7048865 | 1007261 | ATPase, Na+/K+ transporting, alpha 3 polypeptide    | Atp1a3 | 24213  | 2,69 | down |
| 6264749 | 7048865 | 1007265 | ATPase, Na+/K+ transporting, alpha 3 polypeptide    | Atp1a3 | 24213  | 1,45 | down |
| 6288843 | 7048865 | 1007267 | ATPase, Na+/K+ transporting, alpha 3 polypeptide    | Atp1a3 | 24213  | 1,23 | up   |
| 6303774 | 7048865 | 1007254 | ATPase, Na+/K+ transporting, alpha 3 polypeptide    | Atp1a3 | 24213  | 1,40 | down |
| 6367840 | 7048865 | 1007272 | ATPase, Na+/K+ transporting, alpha 3 polypeptide    | Atp1a3 | 24213  | 1,34 | up   |
| 6423733 | 7048865 | 1007276 | ATPase, Na+/K+ transporting, alpha 3 polypeptide    | Atp1a3 | 24213  | 1,07 | up   |
| 6434947 | 7048865 | 1007270 | ATPase, Na+/K+ transporting, alpha 3 polypeptide    | Atp1a3 | 24213  | 1,17 | down |
| 6461542 | 7048865 | 1007269 | ATPase, Na+/K+ transporting, alpha 3 polypeptide    | Atp1a3 | 24213  | 1,02 | down |
| 6478587 | 7048865 | 1007258 | ATPase, Na+/K+ transporting, alpha 3 polypeptide    | Atp1a3 | 24213  | 1,31 | down |
| 6545786 | 7048865 | 1007257 | ATPase, Na+/K+ transporting, alpha 3 polypeptide    | Atp1a3 | 24213  | 1,48 | down |
| 6558932 | 7048865 | 1007275 | ATPase, Na+/K+ transporting, alpha 3 polypeptide    | Atp1a3 | 24213  | 1,28 | up   |
| 6718629 | 7048865 | 1007268 | ATPase, Na+/K+ transporting, alpha 3 polypeptide    | Atp1a3 | 24213  | 1,23 | up   |
| 6726326 | 7048865 | 1007263 | ATPase, Na+/K+ transporting, alpha 3 polypeptide    | Atp1a3 | 24213  | 1,50 | down |
| 6744178 | 7048865 | 1007264 | ATPase, Na+/K+ transporting, alpha 3 polypeptide    | Atp1a3 | 24213  | 1,19 | down |
| 6744362 | 7048865 | 1007253 | ATPase, Na+/K+ transporting, alpha 3 polypeptide    | Atp1a3 | 24213  | 1,79 | up   |
| 5632434 | 7198644 | 1372281 | ATP-binding cassette, sub-family A (ABC1), member 4 | Abca4  | 310836 | 1,10 | down |
| 5657461 | 7198644 | 1372341 | ATP-binding cassette, sub-family A (ABC1), member 4 | Abca4  | 310836 | 1,08 | up   |
| 5669931 | 7198644 | 1372288 | ATP-binding cassette, sub-family A (ABC1), member 4 | Abca4  | 310836 | 1,66 | down |
| 5671319 | 7198644 | 1372291 | ATP-binding cassette, sub-family A (ABC1), member 4 | Abca4  | 310836 | 1,17 | up   |
| 5712441 | 7198644 | 1372316 | ATP-binding cassette, sub-family A (ABC1), member 4 | Abca4  | 310836 | 1,06 | down |
| 5729199 | 7198644 | 1372292 | ATP-binding cassette, sub-family A (ABC1), member 4 | Abca4  | 310836 | 1,00 | up   |
| 5737873 | 7198644 | 1372335 | ATP-binding cassette, sub-family A (ABC1), member 4 | Abca4  | 310836 | 1,04 | up   |
| 5748162 | 7198644 | 1372303 | ATP-binding cassette, sub-family A (ABC1), member 4 | Abca4  | 310836 | 1,04 | down |
| 5751753 | 7198644 | 1372301 | ATP-binding cassette, sub-family A (ABC1), member 4 | Abca4  | 310836 | 1,00 | up   |
| 5753268 | 7198644 | 1372355 | ATP-binding cassette, sub-family A (ABC1), member 4 | Abca4  | 310836 | 2,05 | up   |
| 5768085 | 7198644 | 1372322 | ATP-binding cassette, sub-family A (ABC1), member 4 | Abca4  | 310836 | 1,12 | up   |
| 5776198 | 7198644 | 1372276 | ATP-binding cassette, sub-family A (ABC1), member 4 | Abca4  | 310836 | 1,02 | down |
| 5779588 | 7198644 | 1372324 | ATP-binding cassette, sub-family A (ABC1), member 4 | Abca4  | 310836 | 1,02 | up   |
| 5782000 | 7198644 | 1372351 | ATP-binding cassette, sub-family A (ABC1), member 4 | Abca4  | 310836 | 1,45 | down |
| 5855338 | 7198644 | 1372353 | ATP-binding cassette, sub-family A (ABC1), member 4 | Abca4  | 310836 | 1,21 | down |
| 5859160 | 7198644 | 1372349 | ATP-binding cassette, sub-family A (ABC1), member 4 | Abca4  | 310836 | 1,42 | down |
| 5860285 | 7198644 | 1372272 | ATP-binding cassette, sub-family A (ABC1), member 4 | Abca4  | 310836 | 1,09 | down |
| 5905592 | 7198644 | 1372347 | ATP-binding cassette, sub-family A (ABC1), member 4 | Abca4  | 310836 | 1,48 | down |
| 5951290 | 7198644 | 1372323 | ATP-binding cassette, sub-family A (ABC1), member 4 | Abca4  | 310836 | 1,05 | up   |
| 5974708 | 7198644 | 1372333 | ATP-binding cassette, sub-family A (ABC1), member 4 | Abca4  | 310836 | 1,03 | up   |
| 5989743 | 7198644 | 1372310 | ATP-binding cassette, sub-family A (ABC1), member 4 | Abca4  | 310836 | 1,05 | up   |
| 6071166 | 7198644 | 1372343 | ATP-binding cassette, sub-family A (ABC1), member 4 | Abca4  | 310836 | 1,19 | down |
| 6073546 | 7198644 | 1372280 | ATP-binding cassette, sub-family A (ABC1), member 4 | Abca4  | 310836 | 1,00 | up   |
| 6136714 | 7198644 | 1372267 | ATP-binding cassette, sub-family A (ABC1), member 4 | Abca4  | 310836 | 1,12 | down |
| 6152975 | 7198644 | 1372308 | ATP-binding cassette, sub-family A (ABC1), member 4 | Abca4  | 310836 | 1,25 | down |
| 6160972 | 7198644 | 1372273 | ATP-binding cassette, sub-family A (ABC1), member 4 | Abca4  | 310836 | 1,20 | down |
| 6163883 | 7198644 | 1372354 | ATP-binding cassette, sub-family A (ABC1), member 4 | Abca4  | 310836 | 1,17 | up   |
| 6216590 | 7198644 | 1372338 | ATP-binding cassette, sub-family A (ABC1), member 4 | Abca4  | 310836 | 1,04 | down |
| 6217005 | 7198644 | 1372282 | ATP-binding cassette, sub-family A (ABC1), member 4 | Abca4  | 310836 | 1,01 | down |
| 6218911 | 7198644 | 1372345 | ATP-binding cassette, sub-family A (ABC1), member 4 | Abca4  | 310836 | 1,03 | up   |
| 6240042 | 7198644 | 1372318 | ATP-binding cassette, sub-family A (ABC1), member 4 | Abca4  | 310836 | 1,31 | down |
| 6263941 | 7198644 | 1372323 | ATP-binding cassette, sub-family A (ABC1), member 4 | Abca4  | 310836 | 1,10 | up   |

|         |         |         |                                                      |        |        |      |      |
|---------|---------|---------|------------------------------------------------------|--------|--------|------|------|
| 6271057 | 7198644 | 1372293 | ATP-binding cassette, sub-family A (ABC1), member 4  | Abca4  | 310836 | 1,07 | down |
| 6287987 | 7198644 | 1372290 | ATP-binding cassette, sub-family A (ABC1), member 4  | Abca4  | 310836 | 1,13 | up   |
| 6324190 | 7198644 | 1372325 | ATP-binding cassette, sub-family A (ABC1), member 4  | Abca4  | 310836 | 1,46 | up   |
| 6372142 | 7198644 | 1372308 | ATP-binding cassette, sub-family A (ABC1), member 4  | Abca4  | 310836 | 1,14 | down |
| 6373981 | 7198644 | 1372317 | ATP-binding cassette, sub-family A (ABC1), member 4  | Abca4  | 310836 | 1,28 | down |
| 6384288 | 7198644 | 1372348 | ATP-binding cassette, sub-family A (ABC1), member 4  | Abca4  | 310836 | 1,48 | up   |
| 6402049 | 7198644 | 1372350 | ATP-binding cassette, sub-family A (ABC1), member 4  | Abca4  | 310836 | 2,01 | up   |
| 6413107 | 7198644 | 1372327 | ATP-binding cassette, sub-family A (ABC1), member 4  | Abca4  | 310836 | 1,10 | up   |
| 6417025 | 7198644 | 1372336 | ATP-binding cassette, sub-family A (ABC1), member 4  | Abca4  | 310836 | 1,35 | up   |
| 6429495 | 7198644 | 1372319 | ATP-binding cassette, sub-family A (ABC1), member 4  | Abca4  | 310836 | 1,13 | up   |
| 6440259 | 7198644 | 1372330 | ATP-binding cassette, sub-family A (ABC1), member 4  | Abca4  | 310836 | 1,20 | up   |
| 6479159 | 7198644 | 1372344 | ATP-binding cassette, sub-family A (ABC1), member 4  | Abca4  | 310836 | 1,12 | up   |
| 6534786 | 7198644 | 1372315 | ATP-binding cassette, sub-family A (ABC1), member 4  | Abca4  | 310836 | 1,00 | up   |
| 6541989 | 7198644 | 1372321 | ATP-binding cassette, sub-family A (ABC1), member 4  | Abca4  | 310836 | 1,56 | up   |
| 6562339 | 7198644 | 1372309 | ATP-binding cassette, sub-family A (ABC1), member 4  | Abca4  | 310836 | 1,16 | down |
| 6588965 | 7198644 | 1372327 | ATP-binding cassette, sub-family A (ABC1), member 4  | Abca4  | 310836 | 2,24 | down |
| 6595051 | 7198644 | 1372356 | ATP-binding cassette, sub-family A (ABC1), member 4  | Abca4  | 310836 | 1,27 | up   |
| 6624451 | 7198644 | 1372320 | ATP-binding cassette, sub-family A (ABC1), member 4  | Abca4  | 310836 | 1,03 | down |
| 6634044 | 7198644 | 1372311 | ATP-binding cassette, sub-family A (ABC1), member 4  | Abca4  | 310836 | 1,23 | down |
| 6661924 | 7198644 | 1372323 | ATP-binding cassette, sub-family A (ABC1), member 4  | Abca4  | 310836 | 1,03 | down |
| 6693967 | 7198644 | 1372337 | ATP-binding cassette, sub-family A (ABC1), member 4  | Abca4  | 310836 | 1,56 | up   |
| 6705822 | 7198644 | 1372302 | ATP-binding cassette, sub-family A (ABC1), member 4  | Abca4  | 310836 | 1,00 | up   |
| 6708439 | 7198644 | 1372294 | ATP-binding cassette, sub-family A (ABC1), member 4  | Abca4  | 310836 | 1,02 | down |
| 5617712 | 7083965 | 1088230 | ATP-binding cassette, sub-family A (ABC1), member 8a | Abca8a | 303638 | 1,29 | down |
| 5626810 | 7083965 | 1088243 | ATP-binding cassette, sub-family A (ABC1), member 8a | Abca8a | 303638 | 1,05 | up   |
| 5629262 | 7083965 | 1088241 | ATP-binding cassette, sub-family A (ABC1), member 8a | Abca8a | 303638 | 1,07 | up   |
| 5667752 | 7083965 | 1088234 | ATP-binding cassette, sub-family A (ABC1), member 8a | Abca8a | 303638 | 1,62 | down |
| 5736728 | 7083965 | 1088254 | ATP-binding cassette, sub-family A (ABC1), member 8a | Abca8a | 303638 | 1,31 | down |
| 5753443 | 7083965 | 1088213 | ATP-binding cassette, sub-family A (ABC1), member 8a | Abca8a | 303638 | 1,12 | down |
| 5790347 | 7083965 | 1088213 | ATP-binding cassette, sub-family A (ABC1), member 8a | Abca8a | 303638 | 1,00 | up   |
| 5796408 | 7083965 | 1088248 | ATP-binding cassette, sub-family A (ABC1), member 8a | Abca8a | 303638 | 1,35 | down |
| 5804504 | 7083965 | 1088253 | ATP-binding cassette, sub-family A (ABC1), member 8a | Abca8a | 303638 | 1,13 | up   |
| 5839011 | 7083965 | 1088231 | ATP-binding cassette, sub-family A (ABC1), member 8a | Abca8a | 303638 | 1,12 | up   |
| 5844751 | 7083965 | 1088226 | ATP-binding cassette, sub-family A (ABC1), member 8a | Abca8a | 303638 | 1,04 | up   |
| 5847207 | 7083965 | 1088238 | ATP-binding cassette, sub-family A (ABC1), member 8a | Abca8a | 303638 | 1,40 | down |
| 5905006 | 7083965 | 1088237 | ATP-binding cassette, sub-family A (ABC1), member 8a | Abca8a | 303638 | 1,12 | up   |
| 5939153 | 7083965 | 1088224 | ATP-binding cassette, sub-family A (ABC1), member 8a | Abca8a | 303638 | 1,06 | up   |
| 6029000 | 7083965 | 1088240 | ATP-binding cassette, sub-family A (ABC1), member 8a | Abca8a | 303638 | 1,06 | down |
| 6068315 | 7083965 | 1088246 | ATP-binding cassette, sub-family A (ABC1), member 8a | Abca8a | 303638 | 1,00 | up   |
| 6086364 | 7083965 | 1088217 | ATP-binding cassette, sub-family A (ABC1), member 8a | Abca8a | 303638 | 1,28 | up   |
| 6107558 | 7083965 | 1088227 | ATP-binding cassette, sub-family A (ABC1), member 8a | Abca8a | 303638 | 1,03 | up   |
| 6122837 | 7083965 | 1088245 | ATP-binding cassette, sub-family A (ABC1), member 8a | Abca8a | 303638 | 1,04 | up   |
| 6147149 | 7083965 | 1088239 | ATP-binding cassette, sub-family A (ABC1), member 8a | Abca8a | 303638 | 1,44 | down |
| 6148980 | 7083965 | 1088232 | ATP-binding cassette, sub-family A (ABC1), member 8a | Abca8a | 303638 | 1,05 | down |
| 6152870 | 7083965 | 1088251 | ATP-binding cassette, sub-family A (ABC1), member 8a | Abca8a | 303638 | 1,19 | down |
| 6185075 | 7083965 | 1088245 | ATP-binding cassette, sub-family A (ABC1), member 8a | Abca8a | 303638 | 1,43 | down |
| 6197745 | 7083965 | 1088235 | ATP-binding cassette, sub-family A (ABC1), member 8a | Abca8a | 303638 | 1,00 | down |
| 6218551 | 7083965 | 1088216 | ATP-binding cassette, sub-family A (ABC1), member 8a | Abca8a | 303638 | 1,00 | up   |
| 6233734 | 7083965 | 1088218 | ATP-binding cassette, sub-family A (ABC1), member 8a | Abca8a | 303638 | 1,77 | up   |
| 6243622 | 7083965 | 1088242 | ATP-binding cassette, sub-family A (ABC1), member 8a | Abca8a | 303638 | 1,02 | up   |
| 6317916 | 7083965 | 1088228 | ATP-binding cassette, sub-family A (ABC1), member 8a | Abca8a | 303638 | 1,31 | down |
| 6346267 | 7083965 | 1088223 | ATP-binding cassette, sub-family A (ABC1), member 8a | Abca8a | 303638 | 1,08 | up   |
| 6380000 | 7083965 | 1088225 | ATP-binding cassette, sub-family A (ABC1), member 8a | Abca8a | 303638 | 2,11 | down |
| 6420806 | 7083965 | 1088229 | ATP-binding cassette, sub-family A (ABC1), member 8a | Abca8a | 303638 | 1,01 | down |
| 6459578 | 7083965 | 1088215 | ATP-binding cassette, sub-family A (ABC1), member 8a | Abca8a | 303638 | 1,11 | down |
| 6514559 | 7083965 | 1088219 | ATP-binding cassette, sub-family A (ABC1), member 8a | Abca8a | 303638 | 1,02 | down |

|         |         |         |                                                         |        |        |      |      |
|---------|---------|---------|---------------------------------------------------------|--------|--------|------|------|
| 6574989 | 7083965 | 1088214 | ATP-binding cassette, sub-family A (ABC1), member 8a    | Abca8a | 303638 | 1,05 | up   |
| 6611186 | 7083965 | 1088250 | ATP-binding cassette, sub-family A (ABC1), member 8a    | Abca8a | 303638 | 1,48 | down |
| 6612645 | 7083965 | 1088221 | ATP-binding cassette, sub-family A (ABC1), member 8a    | Abca8a | 303638 | 1,67 | down |
| 6650927 | 7083965 | 1088225 | ATP-binding cassette, sub-family A (ABC1), member 8a    | Abca8a | 303638 | 1,29 | down |
| 6656268 | 7083965 | 1088247 | ATP-binding cassette, sub-family A (ABC1), member 8a    | Abca8a | 303638 | 1,16 | up   |
| 6664912 | 7083965 | 1088222 | ATP-binding cassette, sub-family A (ABC1), member 8a    | Abca8a | 303638 | 1,03 | up   |
| 6671489 | 7083965 | 1088219 | ATP-binding cassette, sub-family A (ABC1), member 8a    | Abca8a | 303638 | 1,08 | down |
| 6697639 | 7083965 | 1088227 | ATP-binding cassette, sub-family A (ABC1), member 8a    | Abca8a | 303638 | 1,07 | down |
| 5619823 | 7250393 | 1498326 | ATP-binding cassette, sub-family B (MDR/TAP), member 1  | Abcb1  | 170913 | 2,34 | down |
| 5698086 | 7250393 | 1498339 | ATP-binding cassette, sub-family B (MDR/TAP), member 1  | Abcb1  | 170913 | 1,01 | up   |
| 5742066 | 7250393 | 1498338 | ATP-binding cassette, sub-family B (MDR/TAP), member 1  | Abcb1  | 170913 | 2,49 | up   |
| 5782776 | 7250393 | 1498331 | ATP-binding cassette, sub-family B (MDR/TAP), member 1  | Abcb1  | 170913 | 2,74 | down |
| 5840139 | 7250393 | 1498329 | ATP-binding cassette, sub-family B (MDR/TAP), member 1  | Abcb1  | 170913 | 2,45 | down |
| 5895570 | 7250393 | 1498336 | ATP-binding cassette, sub-family B (MDR/TAP), member 1  | Abcb1  | 170913 | 1,41 | up   |
| 5980846 | 7250393 | 1498334 | ATP-binding cassette, sub-family B (MDR/TAP), member 1  | Abcb1  | 170913 | 1,29 | down |
| 6007333 | 7250393 | 1498314 | ATP-binding cassette, sub-family B (MDR/TAP), member 1  | Abcb1  | 170913 | 3,96 | down |
| 6016868 | 7250393 | 1498324 | ATP-binding cassette, sub-family B (MDR/TAP), member 1  | Abcb1  | 170913 | 2,42 | up   |
| 6097230 | 7250393 | 1498328 | ATP-binding cassette, sub-family B (MDR/TAP), member 1  | Abcb1  | 170913 | 2,05 | down |
| 6098828 | 7250393 | 1498317 | ATP-binding cassette, sub-family B (MDR/TAP), member 1  | Abcb1  | 170913 | 2,16 | up   |
| 6145358 | 7250393 | 1498337 | ATP-binding cassette, sub-family B (MDR/TAP), member 1  | Abcb1  | 170913 | 1,46 | up   |
| 6167416 | 7250393 | 1498339 | ATP-binding cassette, sub-family B (MDR/TAP), member 1  | Abcb1  | 170913 | 1,62 | down |
| 6198334 | 7250393 | 1498321 | ATP-binding cassette, sub-family B (MDR/TAP), member 1  | Abcb1  | 170913 | 1,59 | down |
| 6231297 | 7250393 | 1498320 | ATP-binding cassette, sub-family B (MDR/TAP), member 1  | Abcb1  | 170913 | 1,16 | up   |
| 6253952 | 7250393 | 1498313 | ATP-binding cassette, sub-family B (MDR/TAP), member 1  | Abcb1  | 170913 | 3,26 | down |
| 6267936 | 7250393 | 1498323 | ATP-binding cassette, sub-family B (MDR/TAP), member 1  | Abcb1  | 170913 | 1,10 | up   |
| 6272544 | 7250393 | 1498335 | ATP-binding cassette, sub-family B (MDR/TAP), member 1  | Abcb1  | 170913 | 1,07 | up   |
| 6276903 | 7250393 | 1498330 | ATP-binding cassette, sub-family B (MDR/TAP), member 1  | Abcb1  | 170913 | 1,95 | up   |
| 6282355 | 7250393 | 1498325 | ATP-binding cassette, sub-family B (MDR/TAP), member 1  | Abcb1  | 170913 | 1,20 | up   |
| 6284395 | 7250393 | 1498339 | ATP-binding cassette, sub-family B (MDR/TAP), member 1  | Abcb1  | 170913 | 3,39 | down |
| 6327593 | 7250393 | 1498332 | ATP-binding cassette, sub-family B (MDR/TAP), member 1  | Abcb1  | 170913 | 1,59 | down |
| 6358410 | 7250393 | 1498333 | ATP-binding cassette, sub-family B (MDR/TAP), member 1  | Abcb1  | 170913 | 3,84 | up   |
| 6361510 | 7250393 | 1498327 | ATP-binding cassette, sub-family B (MDR/TAP), member 1  | Abcb1  | 170913 | 1,17 | down |
| 6469306 | 7250393 | 1498322 | ATP-binding cassette, sub-family B (MDR/TAP), member 1  | Abcb1  | 170913 | 1,45 | down |
| 6574248 | 7250393 | 1498340 | ATP-binding cassette, sub-family B (MDR/TAP), member 1  | Abcb1  | 170913 | 5,12 | down |
| 6625428 | 7250393 | 1498319 | ATP-binding cassette, sub-family B (MDR/TAP), member 1  | Abcb1  | 170913 | 1,62 | down |
| 6626563 | 7250393 | 1498316 | ATP-binding cassette, sub-family B (MDR/TAP), member 1  | Abcb1  | 170913 | 1,34 | down |
| 6703837 | 7250393 | 1498318 | ATP-binding cassette, sub-family B (MDR/TAP), member 1  | Abcb1  | 170913 | 1,28 | up   |
| 6721437 | 7250393 | 1498334 | ATP-binding cassette, sub-family B (MDR/TAP), member 1  | Abcb1  | 170913 | 1,08 | down |
| 6739095 | 7250393 | 1498315 | ATP-binding cassette, sub-family B (MDR/TAP), member 1  | Abcb1  | 170913 | 1,02 | up   |
| 5650532 | 7250403 | 1498363 | ATP-binding cassette, sub-family B (MDR/TAP), member 1B | Abcb1b | 24646  | 1,76 | up   |
| 5658451 | 7250403 | 1498356 | ATP-binding cassette, sub-family B (MDR/TAP), member 1B | Abcb1b | 24646  | 1,16 | down |
| 5695568 | 7250403 | 1498359 | ATP-binding cassette, sub-family B (MDR/TAP), member 1B | Abcb1b | 24646  | 1,03 | up   |
| 5729475 | 7250403 | 1498374 | ATP-binding cassette, sub-family B (MDR/TAP), member 1B | Abcb1b | 24646  | 1,25 | down |
| 5730001 | 7250403 | 1498376 | ATP-binding cassette, sub-family B (MDR/TAP), member 1B | Abcb1b | 24646  | 1,95 | down |
| 5741873 | 7250403 | 1498367 | ATP-binding cassette, sub-family B (MDR/TAP), member 1B | Abcb1b | 24646  | 1,43 | down |
| 5760636 | 7250403 | 1498375 | ATP-binding cassette, sub-family B (MDR/TAP), member 1B | Abcb1b | 24646  | 1,48 | up   |
| 5800715 | 7250403 | 1498372 | ATP-binding cassette, sub-family B (MDR/TAP), member 1B | Abcb1b | 24646  | 1,64 | up   |
| 5847446 | 7250403 | 1498364 | ATP-binding cassette, sub-family B (MDR/TAP), member 1B | Abcb1b | 24646  | 3,00 | down |
| 5975570 | 7250403 | 1498365 | ATP-binding cassette, sub-family B (MDR/TAP), member 1B | Abcb1b | 24646  | 1,30 | down |
| 6079384 | 7250403 | 1498362 | ATP-binding cassette, sub-family B (MDR/TAP), member 1B | Abcb1b | 24646  | 1,49 | up   |
| 6129825 | 7250403 | 1498381 | ATP-binding cassette, sub-family B (MDR/TAP), member 1B | Abcb1b | 24646  | 2,32 | down |
| 6153883 | 7250403 | 1498361 | ATP-binding cassette, sub-family B (MDR/TAP), member 1B | Abcb1b | 24646  | 1,93 | down |
| 6171255 | 7250403 | 1498359 | ATP-binding cassette, sub-family B (MDR/TAP), member 1B | Abcb1b | 24646  | 1,50 | up   |
| 6221184 | 7250403 | 1498379 | ATP-binding cassette, sub-family B (MDR/TAP), member 1B | Abcb1b | 24646  | 5,42 | down |
| 6228271 | 7250403 | 1498378 | ATP-binding cassette, sub-family B (MDR/TAP), member 1B | Abcb1b | 24646  | 3,87 | down |
| 6247446 | 7250403 | 1498368 | ATP-binding cassette, sub-family B (MDR/TAP), member 1B | Abcb1b | 24646  | 1,06 | up   |

|         |         |         |                                                         |        |       |      |      |
|---------|---------|---------|---------------------------------------------------------|--------|-------|------|------|
| 6282170 | 7250403 | 1498371 | ATP-binding cassette, sub-family B (MDR/TAP), member 1B | Abcb1b | 24646 | 1,15 | up   |
| 6286851 | 7250403 | 1498360 | ATP-binding cassette, sub-family B (MDR/TAP), member 1B | Abcb1b | 24646 | 1,79 | up   |
| 6299354 | 7250403 | 1498357 | ATP-binding cassette, sub-family B (MDR/TAP), member 1B | Abcb1b | 24646 | 2,96 | down |
| 6326477 | 7250403 | 1498377 | ATP-binding cassette, sub-family B (MDR/TAP), member 1B | Abcb1b | 24646 | 1,27 | down |
| 6410145 | 7250403 | 1498370 | ATP-binding cassette, sub-family B (MDR/TAP), member 1B | Abcb1b | 24646 | 1,55 | up   |
| 6417916 | 7250403 | 1498358 | ATP-binding cassette, sub-family B (MDR/TAP), member 1B | Abcb1b | 24646 | 4,07 | down |
| 6531383 | 7250403 | 1498355 | ATP-binding cassette, sub-family B (MDR/TAP), member 1B | Abcb1b | 24646 | 1,83 | up   |
| 6566984 | 7250403 | 1498380 | ATP-binding cassette, sub-family B (MDR/TAP), member 1B | Abcb1b | 24646 | 1,08 | down |
| 6597141 | 7250403 | 1498357 | ATP-binding cassette, sub-family B (MDR/TAP), member 1B | Abcb1b | 24646 | 1,90 | up   |
| 6611732 | 7250403 | 1498373 | ATP-binding cassette, sub-family B (MDR/TAP), member 1B | Abcb1b | 24646 | 1,27 | up   |
| 6617983 | 7250403 | 1498369 | ATP-binding cassette, sub-family B (MDR/TAP), member 1B | Abcb1b | 24646 | 1,05 | down |
| 6741153 | 7250403 | 1498366 | ATP-binding cassette, sub-family B (MDR/TAP), member 1B | Abcb1b | 24646 | 2,18 | up   |
| 5633359 | 7250417 | 1498424 | ATP-binding cassette, sub-family B (MDR/TAP), member 4  | Abcb4  | 24891 | 1,38 | up   |
| 5649552 | 7250417 | 1498405 | ATP-binding cassette, sub-family B (MDR/TAP), member 4  | Abcb4  | 24891 | 1,20 | down |
| 5683292 | 7250417 | 1498415 | ATP-binding cassette, sub-family B (MDR/TAP), member 4  | Abcb4  | 24891 | 1,38 | down |
| 5753312 | 7250417 | 1498410 | ATP-binding cassette, sub-family B (MDR/TAP), member 4  | Abcb4  | 24891 | 1,05 | up   |
| 5809317 | 7250417 | 1498408 | ATP-binding cassette, sub-family B (MDR/TAP), member 4  | Abcb4  | 24891 | 1,26 | up   |
| 5813985 | 7250417 | 1498414 | ATP-binding cassette, sub-family B (MDR/TAP), member 4  | Abcb4  | 24891 | 6,42 | up   |
| 5828129 | 7250417 | 1498421 | ATP-binding cassette, sub-family B (MDR/TAP), member 4  | Abcb4  | 24891 | 1,22 | down |
| 5842791 | 7250417 | 1498407 | ATP-binding cassette, sub-family B (MDR/TAP), member 4  | Abcb4  | 24891 | 1,61 | up   |
| 5865732 | 7250417 | 1498428 | ATP-binding cassette, sub-family B (MDR/TAP), member 4  | Abcb4  | 24891 | 1,37 | up   |
| 5900790 | 7250417 | 1498422 | ATP-binding cassette, sub-family B (MDR/TAP), member 4  | Abcb4  | 24891 | 1,60 | up   |
| 5910306 | 7250417 | 1498425 | ATP-binding cassette, sub-family B (MDR/TAP), member 4  | Abcb4  | 24891 | 1,46 | down |
| 5947346 | 7250417 | 1498411 | ATP-binding cassette, sub-family B (MDR/TAP), member 4  | Abcb4  | 24891 | 1,38 | down |
| 6097121 | 7250417 | 1498412 | ATP-binding cassette, sub-family B (MDR/TAP), member 4  | Abcb4  | 24891 | 1,22 | up   |
| 6109372 | 7250417 | 1498406 | ATP-binding cassette, sub-family B (MDR/TAP), member 4  | Abcb4  | 24891 | 1,36 | up   |
| 6257094 | 7250417 | 1498417 | ATP-binding cassette, sub-family B (MDR/TAP), member 4  | Abcb4  | 24891 | 1,09 | up   |
| 6298172 | 7250417 | 1498423 | ATP-binding cassette, sub-family B (MDR/TAP), member 4  | Abcb4  | 24891 | 1,14 | up   |
| 6347525 | 7250417 | 1498427 | ATP-binding cassette, sub-family B (MDR/TAP), member 4  | Abcb4  | 24891 | 1,23 | down |
| 6369272 | 7250417 | 1498419 | ATP-binding cassette, sub-family B (MDR/TAP), member 4  | Abcb4  | 24891 | 1,05 | down |
| 6431894 | 7250417 | 1498430 | ATP-binding cassette, sub-family B (MDR/TAP), member 4  | Abcb4  | 24891 | 1,32 | down |
| 6441881 | 7250417 | 1498426 | ATP-binding cassette, sub-family B (MDR/TAP), member 4  | Abcb4  | 24891 | 1,35 | down |
| 6488481 | 7250417 | 1498418 | ATP-binding cassette, sub-family B (MDR/TAP), member 4  | Abcb4  | 24891 | 1,16 | down |
| 6508924 | 7250417 | 1498420 | ATP-binding cassette, sub-family B (MDR/TAP), member 4  | Abcb4  | 24891 | 1,08 | down |
| 6564372 | 7250417 | 1498406 | ATP-binding cassette, sub-family B (MDR/TAP), member 4  | Abcb4  | 24891 | 1,24 | down |
| 6569813 | 7250417 | 1498416 | ATP-binding cassette, sub-family B (MDR/TAP), member 4  | Abcb4  | 24891 | 1,14 | up   |
| 6610466 | 7250417 | 1498404 | ATP-binding cassette, sub-family B (MDR/TAP), member 4  | Abcb4  | 24891 | 1,41 | down |
| 6657348 | 7250417 | 1498409 | ATP-binding cassette, sub-family B (MDR/TAP), member 4  | Abcb4  | 24891 | 1,99 | down |
| 6685683 | 7250417 | 1498413 | ATP-binding cassette, sub-family B (MDR/TAP), member 4  | Abcb4  | 24891 | 1,05 | down |
| 6693277 | 7250417 | 1498429 | ATP-binding cassette, sub-family B (MDR/TAP), member 4  | Abcb4  | 24891 | 1,04 | up   |
| 5911374 | 7098148 | 1123068 | ATP-binding cassette, sub-family B (MDR/TAP), member 9  | Abcb9  | 63886 | 1,20 | down |
| 5952332 | 7098148 | 1123060 | ATP-binding cassette, sub-family B (MDR/TAP), member 9  | Abcb9  | 63886 | 1,05 | down |
| 5953932 | 7098148 | 1123067 | ATP-binding cassette, sub-family B (MDR/TAP), member 9  | Abcb9  | 63886 | 1,24 | down |
| 5955059 | 7098148 | 1123060 | ATP-binding cassette, sub-family B (MDR/TAP), member 9  | Abcb9  | 63886 | 1,01 | up   |
| 5985681 | 7098148 | 1123064 | ATP-binding cassette, sub-family B (MDR/TAP), member 9  | Abcb9  | 63886 | 1,33 | up   |
| 6001448 | 7098148 | 1123061 | ATP-binding cassette, sub-family B (MDR/TAP), member 9  | Abcb9  | 63886 | 1,04 | up   |
| 6072121 | 7098148 | 1123069 | ATP-binding cassette, sub-family B (MDR/TAP), member 9  | Abcb9  | 63886 | 1,11 | up   |
| 6223018 | 7098148 | 1123062 | ATP-binding cassette, sub-family B (MDR/TAP), member 9  | Abcb9  | 63886 | 2,10 | down |
| 6268232 | 7098148 | 1123072 | ATP-binding cassette, sub-family B (MDR/TAP), member 9  | Abcb9  | 63886 | 1,09 | up   |
| 6297275 | 7098148 | 1123063 | ATP-binding cassette, sub-family B (MDR/TAP), member 9  | Abcb9  | 63886 | 1,20 | up   |
| 6338555 | 7098148 | 1123065 | ATP-binding cassette, sub-family B (MDR/TAP), member 9  | Abcb9  | 63886 | 1,00 | up   |
| 6453750 | 7098148 | 1123071 | ATP-binding cassette, sub-family B (MDR/TAP), member 9  | Abcb9  | 63886 | 1,90 | up   |
| 6643380 | 7098148 | 1123059 | ATP-binding cassette, sub-family B (MDR/TAP), member 9  | Abcb9  | 63886 | 1,87 | up   |
| 6652007 | 7098148 | 1123070 | ATP-binding cassette, sub-family B (MDR/TAP), member 9  | Abcb9  | 63886 | 1,20 | up   |
| 6715827 | 7098148 | 1123066 | ATP-binding cassette, sub-family B (MDR/TAP), member 9  | Abcb9  | 63886 | 1,35 | down |
| 6726362 | 7098148 | 1123070 | ATP-binding cassette, sub-family B (MDR/TAP), member 9  | Abcb9  | 63886 | 1,00 | up   |

|         |         |         |                                                          |        |        |      |      |
|---------|---------|---------|----------------------------------------------------------|--------|--------|------|------|
| 5671248 | 7352044 | 1750018 | ATP-binding cassette, sub-family C (CFTR/MRP), member 10 | Abcc10 | 316231 | 1,18 | down |
| 5722772 | 7352044 | 1750004 | ATP-binding cassette, sub-family C (CFTR/MRP), member 10 | Abcc10 | 316231 | 1,44 | up   |
| 5765729 | 7352044 | 1750013 | ATP-binding cassette, sub-family C (CFTR/MRP), member 10 | Abcc10 | 316231 | 1,21 | down |
| 5792624 | 7352044 | 1750010 | ATP-binding cassette, sub-family C (CFTR/MRP), member 10 | Abcc10 | 316231 | 1,30 | down |
| 5794836 | 7352044 | 1750015 | ATP-binding cassette, sub-family C (CFTR/MRP), member 10 | Abcc10 | 316231 | 1,99 | down |
| 5852980 | 7352044 | 1750011 | ATP-binding cassette, sub-family C (CFTR/MRP), member 10 | Abcc10 | 316231 | 1,47 | down |
| 5871188 | 7352044 | 1750012 | ATP-binding cassette, sub-family C (CFTR/MRP), member 10 | Abcc10 | 316231 | 1,15 | up   |
| 5886459 | 7352044 | 1750021 | ATP-binding cassette, sub-family C (CFTR/MRP), member 10 | Abcc10 | 316231 | 1,24 | down |
| 6021223 | 7352044 | 1750007 | ATP-binding cassette, sub-family C (CFTR/MRP), member 10 | Abcc10 | 316231 | 1,10 | up   |
| 6055249 | 7352044 | 1750009 | ATP-binding cassette, sub-family C (CFTR/MRP), member 10 | Abcc10 | 316231 | 1,10 | up   |
| 6077685 | 7352044 | 1750005 | ATP-binding cassette, sub-family C (CFTR/MRP), member 10 | Abcc10 | 316231 | 1,41 | down |
| 6142945 | 7352044 | 1750017 | ATP-binding cassette, sub-family C (CFTR/MRP), member 10 | Abcc10 | 316231 | 1,26 | down |
| 6174018 | 7352044 | 1750004 | ATP-binding cassette, sub-family C (CFTR/MRP), member 10 | Abcc10 | 316231 | 1,10 | up   |
| 6235295 | 7352044 | 1750014 | ATP-binding cassette, sub-family C (CFTR/MRP), member 10 | Abcc10 | 316231 | 1,07 | down |
| 6297926 | 7352044 | 1750004 | ATP-binding cassette, sub-family C (CFTR/MRP), member 10 | Abcc10 | 316231 | 1,16 | down |
| 6301144 | 7352044 | 1750004 | ATP-binding cassette, sub-family C (CFTR/MRP), member 10 | Abcc10 | 316231 | 1,64 | down |
| 6316011 | 7352044 | 1750016 | ATP-binding cassette, sub-family C (CFTR/MRP), member 10 | Abcc10 | 316231 | 1,10 | up   |
| 6333449 | 7352044 | 1750004 | ATP-binding cassette, sub-family C (CFTR/MRP), member 10 | Abcc10 | 316231 | 1,00 | down |
| 6423201 | 7352044 | 1750004 | ATP-binding cassette, sub-family C (CFTR/MRP), member 10 | Abcc10 | 316231 | 1,49 | down |
| 6436650 | 7352044 | 1750008 | ATP-binding cassette, sub-family C (CFTR/MRP), member 10 | Abcc10 | 316231 | 1,15 | down |
| 6479011 | 7352044 | 1750020 | ATP-binding cassette, sub-family C (CFTR/MRP), member 10 | Abcc10 | 316231 | 1,43 | up   |
| 6495949 | 7352044 | 1750023 | ATP-binding cassette, sub-family C (CFTR/MRP), member 10 | Abcc10 | 316231 | 1,62 | down |
| 6572422 | 7352044 | 1750019 | ATP-binding cassette, sub-family C (CFTR/MRP), member 10 | Abcc10 | 316231 | 1,46 | up   |
| 6627084 | 7352044 | 1750004 | ATP-binding cassette, sub-family C (CFTR/MRP), member 10 | Abcc10 | 316231 | 1,08 | up   |
| 6717766 | 7352044 | 1750011 | ATP-binding cassette, sub-family C (CFTR/MRP), member 10 | Abcc10 | 316231 | 1,15 | up   |
| 5776984 | 7051110 | 1012070 | ATP-binding cassette, sub-family C (CFTR/MRP), member 6  | Abcc6  | 81642  | 1,12 | down |
| 5815792 | 7051110 | 1012055 | ATP-binding cassette, sub-family C (CFTR/MRP), member 6  | Abcc6  | 81642  | 1,08 | up   |
| 5912364 | 7051110 | 1012066 | ATP-binding cassette, sub-family C (CFTR/MRP), member 6  | Abcc6  | 81642  | 1,12 | down |
| 5945898 | 7051110 | 1012056 | ATP-binding cassette, sub-family C (CFTR/MRP), member 6  | Abcc6  | 81642  | 1,36 | up   |
| 5954666 | 7051110 | 1012048 | ATP-binding cassette, sub-family C (CFTR/MRP), member 6  | Abcc6  | 81642  | 1,12 | down |
| 5960620 | 7051110 | 1012045 | ATP-binding cassette, sub-family C (CFTR/MRP), member 6  | Abcc6  | 81642  | 1,13 | down |
| 5975429 | 7051110 | 1012050 | ATP-binding cassette, sub-family C (CFTR/MRP), member 6  | Abcc6  | 81642  | 1,12 | down |
| 6025615 | 7051110 | 1012043 | ATP-binding cassette, sub-family C (CFTR/MRP), member 6  | Abcc6  | 81642  | 1,04 | up   |
| 6038932 | 7051110 | 1012061 | ATP-binding cassette, sub-family C (CFTR/MRP), member 6  | Abcc6  | 81642  | 1,67 | down |
| 6085227 | 7051110 | 1012054 | ATP-binding cassette, sub-family C (CFTR/MRP), member 6  | Abcc6  | 81642  | 2,27 | down |
| 6124989 | 7051110 | 1012073 | ATP-binding cassette, sub-family C (CFTR/MRP), member 6  | Abcc6  | 81642  | 1,03 | up   |
| 6198597 | 7051110 | 1012064 | ATP-binding cassette, sub-family C (CFTR/MRP), member 6  | Abcc6  | 81642  | 1,24 | down |
| 6223908 | 7051110 | 1012052 | ATP-binding cassette, sub-family C (CFTR/MRP), member 6  | Abcc6  | 81642  | 1,02 | down |
| 6233580 | 7051110 | 1012055 | ATP-binding cassette, sub-family C (CFTR/MRP), member 6  | Abcc6  | 81642  | 1,32 | up   |
| 6245049 | 7051110 | 1012067 | ATP-binding cassette, sub-family C (CFTR/MRP), member 6  | Abcc6  | 81642  | 1,07 | up   |
| 6252608 | 7051110 | 1012065 | ATP-binding cassette, sub-family C (CFTR/MRP), member 6  | Abcc6  | 81642  | 1,18 | down |
| 6255939 | 7051110 | 1012047 | ATP-binding cassette, sub-family C (CFTR/MRP), member 6  | Abcc6  | 81642  | 1,19 | up   |
| 6308992 | 7051110 | 1012074 | ATP-binding cassette, sub-family C (CFTR/MRP), member 6  | Abcc6  | 81642  | 1,42 | up   |
| 6312171 | 7051110 | 1012042 | ATP-binding cassette, sub-family C (CFTR/MRP), member 6  | Abcc6  | 81642  | 1,06 | down |
| 6333500 | 7051110 | 1012046 | ATP-binding cassette, sub-family C (CFTR/MRP), member 6  | Abcc6  | 81642  | 1,26 | up   |
| 6363659 | 7051110 | 1012057 | ATP-binding cassette, sub-family C (CFTR/MRP), member 6  | Abcc6  | 81642  | 1,18 | down |
| 6365186 | 7051110 | 1012058 | ATP-binding cassette, sub-family C (CFTR/MRP), member 6  | Abcc6  | 81642  | 1,06 | up   |
| 6383999 | 7051110 | 1012048 | ATP-binding cassette, sub-family C (CFTR/MRP), member 6  | Abcc6  | 81642  | 1,06 | up   |
| 6413857 | 7051110 | 1012051 | ATP-binding cassette, sub-family C (CFTR/MRP), member 6  | Abcc6  | 81642  | 1,01 | up   |
| 6437805 | 7051110 | 1012054 | ATP-binding cassette, sub-family C (CFTR/MRP), member 6  | Abcc6  | 81642  | 1,54 | down |
| 6495856 | 7051110 | 1012049 | ATP-binding cassette, sub-family C (CFTR/MRP), member 6  | Abcc6  | 81642  | 1,24 | up   |
| 6512715 | 7051110 | 1012053 | ATP-binding cassette, sub-family C (CFTR/MRP), member 6  | Abcc6  | 81642  | 1,53 | down |
| 6524833 | 7051110 | 1012062 | ATP-binding cassette, sub-family C (CFTR/MRP), member 6  | Abcc6  | 81642  | 1,00 | down |
| 6567955 | 7051110 | 1012072 | ATP-binding cassette, sub-family C (CFTR/MRP), member 6  | Abcc6  | 81642  | 1,14 | up   |
| 6608285 | 7051110 | 1012069 | ATP-binding cassette, sub-family C (CFTR/MRP), member 6  | Abcc6  | 81642  | 1,00 | up   |
| 6635007 | 7051110 | 1012063 | ATP-binding cassette, sub-family C (CFTR/MRP), member 6  | Abcc6  | 81642  | 1,01 | down |



|         |         |         |                                                                                                                          |         |        |      |      |
|---------|---------|---------|--------------------------------------------------------------------------------------------------------------------------|---------|--------|------|------|
| 6660207 | 7051110 | 1012071 | ATP-binding cassette, sub-family C (CFTR/MRP), member 6                                                                  | Abcc6   | 81642  | 1,11 | up   |
| 6687601 | 7051110 | 1012059 | ATP-binding cassette, sub-family C (CFTR/MRP), member 6                                                                  | Abcc6   | 81642  | 1,03 | down |
| 6698591 | 7051110 | 1012047 | ATP-binding cassette, sub-family C (CFTR/MRP), member 6                                                                  | Abcc6   | 81642  | 1,09 | up   |
| 6701036 | 7051110 | 1012060 | ATP-binding cassette, sub-family C (CFTR/MRP), member 6                                                                  | Abcc6   | 81642  | 1,25 | up   |
| 6722366 | 7051110 | 1012044 | ATP-binding cassette, sub-family C (CFTR/MRP), member 6                                                                  | Abcc6   | 81642  | 1,24 | down |
| 6732470 | 7051110 | 1012068 | ATP-binding cassette, sub-family C (CFTR/MRP), member 6                                                                  | Abcc6   | 81642  | 1,31 | down |
| 5737055 | 7308714 | 1644376 | ATP-binding cassette, sub-family D (ALD), member 4                                                                       | Abcd4   | 299196 | 1,35 | down |
| 5817138 | 7308714 | 1644374 | ATP-binding cassette, sub-family D (ALD), member 4                                                                       | Abcd4   | 299196 | 1,14 | down |
| 6008598 | 7308714 | 1644368 | ATP-binding cassette, sub-family D (ALD), member 4                                                                       | Abcd4   | 299196 | 1,38 | up   |
| 6022702 | 7308714 | 1644366 | ATP-binding cassette, sub-family D (ALD), member 4                                                                       | Abcd4   | 299196 | 1,12 | down |
| 6078520 | 7308714 | 1644378 | ATP-binding cassette, sub-family D (ALD), member 4                                                                       | Abcd4   | 299196 | 1,96 | up   |
| 6156115 | 7308714 | 1644370 | ATP-binding cassette, sub-family D (ALD), member 4                                                                       | Abcd4   | 299196 | 1,06 | down |
| 6165919 | 7308714 | 1644377 | ATP-binding cassette, sub-family D (ALD), member 4                                                                       | Abcd4   | 299196 | 1,79 | down |
| 6211267 | 7308714 | 1644373 | ATP-binding cassette, sub-family D (ALD), member 4                                                                       | Abcd4   | 299196 | 1,22 | up   |
| 6253872 | 7308714 | 1644372 | ATP-binding cassette, sub-family D (ALD), member 4                                                                       | Abcd4   | 299196 | 1,22 | up   |
| 6416309 | 7308714 | 1644375 | ATP-binding cassette, sub-family D (ALD), member 4                                                                       | Abcd4   | 299196 | 1,04 | up   |
| 6423343 | 7308714 | 1644373 | ATP-binding cassette, sub-family D (ALD), member 4                                                                       | Abcd4   | 299196 | 1,20 | down |
| 6430158 | 7308714 | 1644369 | ATP-binding cassette, sub-family D (ALD), member 4                                                                       | Abcd4   | 299196 | 1,02 | down |
| 6537478 | 7308714 | 1644379 | ATP-binding cassette, sub-family D (ALD), member 4                                                                       | Abcd4   | 299196 | 1,29 | up   |
| 6700664 | 7308714 | 1644367 | ATP-binding cassette, sub-family D (ALD), member 4                                                                       | Abcd4   | 299196 | 1,18 | down |
| 6715603 | 7308714 | 1644371 | ATP-binding cassette, sub-family D (ALD), member 4                                                                       | Abcd4   | 299196 | 2,75 | up   |
| 5718248 | 7122815 | 1184280 | ATP-binding cassette, sub-family G (WHITE), member 3-like 1                                                              | Abcg31l | 289453 | 1,39 | down |
| 5761941 | 7122815 | 1184279 | ATP-binding cassette, sub-family G (WHITE), member 3-like 1                                                              | Abcg31l | 289453 | 1,57 | down |
| 5785795 | 7122815 | 1184286 | ATP-binding cassette, sub-family G (WHITE), member 3-like 1                                                              | Abcg31l | 289453 | 1,26 | down |
| 6027852 | 7122815 | 1184292 | ATP-binding cassette, sub-family G (WHITE), member 3-like 1                                                              | Abcg31l | 289453 | 2,42 | up   |
| 6040515 | 7122815 | 1184289 | ATP-binding cassette, sub-family G (WHITE), member 3-like 1                                                              | Abcg31l | 289453 | 2,28 | up   |
| 6105979 | 7122815 | 1184285 | ATP-binding cassette, sub-family G (WHITE), member 3-like 1                                                              | Abcg31l | 289453 | 1,01 | up   |
| 6108078 | 7122815 | 1184281 | ATP-binding cassette, sub-family G (WHITE), member 3-like 1                                                              | Abcg31l | 289453 | 2,20 | down |
| 6136263 | 7122815 | 1184293 | ATP-binding cassette, sub-family G (WHITE), member 3-like 1                                                              | Abcg31l | 289453 | 1,95 | up   |
| 6256577 | 7122815 | 1184287 | ATP-binding cassette, sub-family G (WHITE), member 3-like 1                                                              | Abcg31l | 289453 | 1,01 | up   |
| 6328271 | 7122815 | 1184283 | ATP-binding cassette, sub-family G (WHITE), member 3-like 1                                                              | Abcg31l | 289453 | 1,52 | down |
| 6356892 | 7122815 | 1184284 | ATP-binding cassette, sub-family G (WHITE), member 3-like 1                                                              | Abcg31l | 289453 | 1,61 | down |
| 6405294 | 7122815 | 1184288 | ATP-binding cassette, sub-family G (WHITE), member 3-like 1                                                              | Abcg31l | 289453 | 1,45 | down |
| 6447997 | 7122815 | 1184294 | ATP-binding cassette, sub-family G (WHITE), member 3-like 1                                                              | Abcg31l | 289453 | 1,25 | down |
| 6604709 | 7122815 | 1184291 | ATP-binding cassette, sub-family G (WHITE), member 3-like 1                                                              | Abcg31l | 289453 | 1,93 | up   |
| 6617253 | 7122815 | 1184282 | ATP-binding cassette, sub-family G (WHITE), member 3-like 1                                                              | Abcg31l | 289453 | 1,07 | down |
| 6741627 | 7122815 | 1184290 | ATP-binding cassette, sub-family G (WHITE), member 3-like 1                                                              | Abcg31l | 289453 | 1,39 | up   |
| 6014882 | 7122778 | 1184200 | ATP-binding cassette, sub-family G (WHITE), member 3-like 2                                                              | Abcg312 | 360910 | 2,21 | down |
| 6057098 | 7122778 | 1184199 | ATP-binding cassette, sub-family G (WHITE), member 3-like 2                                                              | Abcg312 | 360910 | 3,63 | down |
| 6479309 | 7122778 | 1184194 | ATP-binding cassette, sub-family G (WHITE), member 3-like 2                                                              | Abcg312 | 360910 | 2,19 | down |
| 5867655 | 7122778 | 1184207 | ATP-binding cassette, sub-family G (WHITE), member 3-like 2 /// similar to ATPbcg312 /// LOC36099 360910 /// 360997      |         |        | 1,34 | down |
| 6072686 | 7122778 | 1184208 | ATP-binding cassette, sub-family G (WHITE), member 3-like 2 /// similar to ATPbcg312 /// LOC36099 360910 /// 360997      |         |        | 1,75 | down |
| 6182140 | 7122778 | 1184202 | ATP-binding cassette, sub-family G (WHITE), member 3-like 2 /// similar to ATPbcg312 /// LOC36099 360910 /// 360997      |         |        | 1,20 | down |
| 6237195 | 7122778 | 1184193 | ATP-binding cassette, sub-family G (WHITE), member 3-like 2 /// similar to ATPbcg312 /// LOC36099 360910 /// 360997      |         |        | 1,05 | down |
| 6240618 | 7122778 | 1184206 | ATP-binding cassette, sub-family G (WHITE), member 3-like 2 /// similar to ATPbcg312 /// LOC36099 360910 /// 360997      |         |        | 1,70 | up   |
| 6408537 | 7122778 | 1184204 | ATP-binding cassette, sub-family G (WHITE), member 3-like 2 /// similar to ATPbcg312 /// LOC36099 360910 /// 360997      |         |        | 1,04 | down |
| 6474229 | 7122778 | 1184196 | ATP-binding cassette, sub-family G (WHITE), member 3-like 2 /// similar to ATPbcg312 /// LOC36099 360910 /// 360997      |         |        | 2,08 | up   |
| 6547548 | 7122778 | 1184197 | ATP-binding cassette, sub-family G (WHITE), member 3-like 2 /// similar to ATPbcg312 /// LOC36099 360910 /// 360997      |         |        | 1,87 | down |
| 6709638 | 7122778 | 1184195 | ATP-binding cassette, sub-family G (WHITE), member 3-like 2 /// similar to ATPbcg312 /// LOC36099 360910 /// 360997      |         |        | 2,11 | down |
| 5729540 | 7122778 | 1184205 | ATP-binding cassette, sub-family G (WHITE), member 3-like 2 /// similar to ATP12 /// LOC360997 ///310 /// 360997 /// 498 |         |        | 2,67 | up   |
| 5791168 | 7122778 | 1184201 | ATP-binding cassette, sub-family G (WHITE), member 3-like 2 /// similar to ATP12 /// LOC360997 ///310 /// 360997 /// 498 |         |        | 2,49 | up   |
| 6153643 | 7122778 | 1184193 | ATP-binding cassette, sub-family G (WHITE), member 3-like 2 /// similar to ATP12 /// LOC360997 ///310 /// 360997 /// 498 |         |        | 2,04 | up   |
| 6203931 | 7122778 | 1184198 | ATP-binding cassette, sub-family G (WHITE), member 3-like 2 /// similar to ATP12 /// LOC360997 ///310 /// 360997 /// 498 |         |        | 1,95 | down |
| 6389927 | 7122778 | 1184205 | ATP-binding cassette, sub-family G (WHITE), member 3-like 2 /// similar to ATP12 /// LOC360997 ///310 /// 360997 /// 498 |         |        | 1,39 | up   |
| 6695863 | 7122778 | 1184203 | ATP-binding cassette, sub-family G (WHITE), member 3-like 2 /// similar to ATP12 /// LOC360997 ///310 /// 360997 /// 498 |         |        | 1,79 | up   |
| 5831398 | 7043535 | 994164  | attractin like 1                                                                                                         | Atrnl1  | 307992 | 1,08 | down |

|         |         |         |                                       |          |        |      |      |
|---------|---------|---------|---------------------------------------|----------|--------|------|------|
| 5690368 | 7282319 | 1578598 | aurora kinase A interacting protein 1 | Aurkaip1 | 298687 | 1,04 | up   |
| 5721526 | 7282319 | 1578597 | aurora kinase A interacting protein 1 | Aurkaip1 | 298687 | 1,12 | down |
| 5792952 | 7282319 | 1578597 | aurora kinase A interacting protein 1 | Aurkaip1 | 298687 | 1,04 | down |
| 6274831 | 7282319 | 1578597 | aurora kinase A interacting protein 1 | Aurkaip1 | 298687 | 1,22 | up   |
| 6283840 | 7282319 | 1578599 | aurora kinase A interacting protein 1 | Aurkaip1 | 298687 | 1,82 | down |
| 6349743 | 7282319 | 1578597 | aurora kinase A interacting protein 1 | Aurkaip1 | 298687 | 2,63 | up   |
| 6407711 | 7282319 | 1578597 | aurora kinase A interacting protein 1 | Aurkaip1 | 298687 | 1,12 | down |
| 6488945 | 7282319 | 1578596 | aurora kinase A interacting protein 1 | Aurkaip1 | 298687 | 1,28 | down |
| 6586961 | 7282319 | 1578596 | aurora kinase A interacting protein 1 | Aurkaip1 | 298687 | 1,04 | down |
| 5634867 | 7217583 | 1416977 | autoimmune regulator                  | Aire     | 294328 | 2,59 | up   |
| 5666349 | 7217583 | 1416972 | autoimmune regulator                  | Aire     | 294328 | 1,86 | up   |
| 5695505 | 7217583 | 1416966 | autoimmune regulator                  | Aire     | 294328 | 1,59 | down |
| 5752534 | 7217583 | 1416978 | autoimmune regulator                  | Aire     | 294328 | 1,31 | up   |
| 5777583 | 7217583 | 1416971 | autoimmune regulator                  | Aire     | 294328 | 1,16 | down |
| 5824709 | 7217583 | 1416970 | autoimmune regulator                  | Aire     | 294328 | 1,01 | up   |
| 5924520 | 7217583 | 1416965 | autoimmune regulator                  | Aire     | 294328 | 1,36 | down |
| 5986607 | 7217583 | 1416978 | autoimmune regulator                  | Aire     | 294328 | 1,10 | down |
| 5989711 | 7217583 | 1416969 | autoimmune regulator                  | Aire     | 294328 | 1,09 | up   |
| 6080662 | 7217583 | 1416974 | autoimmune regulator                  | Aire     | 294328 | 1,18 | down |
| 6084848 | 7217583 | 1416975 | autoimmune regulator                  | Aire     | 294328 | 1,10 | down |
| 6135662 | 7217583 | 1416968 | autoimmune regulator                  | Aire     | 294328 | 1,40 | down |
| 6202918 | 7217583 | 1416976 | autoimmune regulator                  | Aire     | 294328 | 1,09 | down |
| 6249274 | 7217583 | 1416967 | autoimmune regulator                  | Aire     | 294328 | 1,29 | up   |
| 6542415 | 7217583 | 1416973 | autoimmune regulator                  | Aire     | 294328 | 1,40 | up   |
| 6699145 | 7217583 | 1416977 | autoimmune regulator                  | Aire     | 294328 | 1,01 | down |
| 6725583 | 7217583 | 1416974 | autoimmune regulator                  | Aire     | 294328 | 1,04 | up   |
| 5649454 | 7093158 | 1110521 | B and T lymphocyte associated         | Btla     | 407756 | 1,00 | up   |
| 5968223 | 7093158 | 1110514 | B and T lymphocyte associated         | Btla     | 407756 | 1,16 | down |
| 5985424 | 7093158 | 1110515 | B and T lymphocyte associated         | Btla     | 407756 | 1,06 | up   |
| 6023797 | 7093158 | 1110516 | B and T lymphocyte associated         | Btla     | 407756 | 1,10 | up   |
| 6362918 | 7093158 | 1110519 | B and T lymphocyte associated         | Btla     | 407756 | 1,23 | down |
| 6470924 | 7093158 | 1110517 | B and T lymphocyte associated         | Btla     | 407756 | 1,44 | down |
| 6487672 | 7093158 | 1110520 | B and T lymphocyte associated         | Btla     | 407756 | 1,17 | down |
| 6580698 | 7093158 | 1110520 | B and T lymphocyte associated         | Btla     | 407756 | 1,01 | down |
| 6639927 | 7093158 | 1110522 | B and T lymphocyte associated         | Btla     | 407756 | 1,00 | up   |
| 6645520 | 7093158 | 1110521 | B and T lymphocyte associated         | Btla     | 407756 | 2,42 | down |
| 5652224 | 7139085 | 1223657 | B lymphoid tyrosine kinase            | Blk      | 364403 | 1,00 | down |
| 5665023 | 7139085 | 1223658 | B lymphoid tyrosine kinase            | Blk      | 364403 | 1,50 | down |
| 5686412 | 7139085 | 1223662 | B lymphoid tyrosine kinase            | Blk      | 364403 | 1,27 | down |
| 5711698 | 7139085 | 1223654 | B lymphoid tyrosine kinase            | Blk      | 364403 | 1,05 | up   |
| 5747501 | 7139085 | 1223658 | B lymphoid tyrosine kinase            | Blk      | 364403 | 1,05 | up   |
| 5811480 | 7139085 | 1223661 | B lymphoid tyrosine kinase            | Blk      | 364403 | 1,63 | down |
| 5841414 | 7139085 | 1223656 | B lymphoid tyrosine kinase            | Blk      | 364403 | 1,10 | down |
| 5864923 | 7139085 | 1223653 | B lymphoid tyrosine kinase            | Blk      | 364403 | 1,15 | down |
| 5943793 | 7139085 | 1223664 | B lymphoid tyrosine kinase            | Blk      | 364403 | 1,05 | down |
| 6128582 | 7139085 | 1223655 | B lymphoid tyrosine kinase            | Blk      | 364403 | 1,12 | up   |
| 6168815 | 7139085 | 1223653 | B lymphoid tyrosine kinase            | Blk      | 364403 | 1,13 | down |
| 6310143 | 7139085 | 1223660 | B lymphoid tyrosine kinase            | Blk      | 364403 | 1,03 | up   |
| 6392315 | 7139085 | 1223659 | B lymphoid tyrosine kinase            | Blk      | 364403 | 1,05 | down |
| 6396097 | 7139085 | 1223663 | B lymphoid tyrosine kinase            | Blk      | 364403 | 2,26 | down |
| 6469351 | 7139085 | 1223674 | B lymphoid tyrosine kinase            | Blk      | 364403 | 1,44 | up   |
| 5744629 | 7341989 | 1725044 | baculoviral IAP repeat-containing 2   | Birc2    | 60371  | 1,39 | down |
| 5784401 | 7341989 | 1725048 | baculoviral IAP repeat-containing 2   | Birc2    | 60371  | 2,08 | up   |
| 5786327 | 7341989 | 1725052 | baculoviral IAP repeat-containing 2   | Birc2    | 60371  | 1,13 | up   |
| 5825327 | 7341989 | 1725051 | baculoviral IAP repeat-containing 2   | Birc2    | 60371  | 1,41 | up   |
| 5901021 | 7341989 | 1725044 | baculoviral IAP repeat-containing 2   | Birc2    | 60371  | 1,01 | down |

|         |         |         |                                                       |          |        |      |      |
|---------|---------|---------|-------------------------------------------------------|----------|--------|------|------|
| 5936281 | 7341989 | 1725044 | baculoviral IAP repeat-containing 2                   | Birc2    | 60371  | 1,26 | down |
| 6147360 | 7341989 | 1725045 | baculoviral IAP repeat-containing 2                   | Birc2    | 60371  | 1,31 | down |
| 6220210 | 7341989 | 1725052 | baculoviral IAP repeat-containing 2                   | Birc2    | 60371  | 1,52 | up   |
| 6289602 | 7341989 | 1725044 | baculoviral IAP repeat-containing 2                   | Birc2    | 60371  | 2,56 | down |
| 6294155 | 7341989 | 1725045 | baculoviral IAP repeat-containing 2                   | Birc2    | 60371  | 1,00 | up   |
| 6329510 | 7341989 | 1725052 | baculoviral IAP repeat-containing 2                   | Birc2    | 60371  | 1,26 | down |
| 6447598 | 7341989 | 1725045 | baculoviral IAP repeat-containing 2                   | Birc2    | 60371  | 1,33 | down |
| 6473187 | 7341989 | 1725052 | baculoviral IAP repeat-containing 2                   | Birc2    | 60371  | 1,11 | up   |
| 6531718 | 7341989 | 1725050 | baculoviral IAP repeat-containing 2                   | Birc2    | 60371  | 1,09 | up   |
| 6570921 | 7341989 | 1725052 | baculoviral IAP repeat-containing 2                   | Birc2    | 60371  | 1,13 | down |
| 6585015 | 7341989 | 1725047 | baculoviral IAP repeat-containing 2                   | Birc2    | 60371  | 1,64 | up   |
| 6668882 | 7341989 | 1725049 | baculoviral IAP repeat-containing 2                   | Birc2    | 60371  | 6,20 | up   |
| 6708661 | 7341989 | 1725048 | baculoviral IAP repeat-containing 2                   | Birc2    | 60371  | 1,33 | up   |
| 6713727 | 7341989 | 1725046 | baculoviral IAP repeat-containing 2                   | Birc2    | 60371  | 1,35 | up   |
| 5679629 | 7341999 | 1725071 | baculoviral IAP repeat-containing 3                   | Birc3    | 78971  | 3,90 | down |
| 5787669 | 7341999 | 1725070 | baculoviral IAP repeat-containing 3                   | Birc3    | 78971  | 2,25 | down |
| 5856477 | 7341999 | 1725062 | baculoviral IAP repeat-containing 3                   | Birc3    | 78971  | 1,25 | up   |
| 5903319 | 7341999 | 1725063 | baculoviral IAP repeat-containing 3                   | Birc3    | 78971  | 2,31 | down |
| 6158470 | 7341999 | 1725066 | baculoviral IAP repeat-containing 3                   | Birc3    | 78971  | 2,99 | down |
| 6232897 | 7341999 | 1725069 | baculoviral IAP repeat-containing 3                   | Birc3    | 78971  | 2,14 | up   |
| 6300405 | 7341999 | 1725064 | baculoviral IAP repeat-containing 3                   | Birc3    | 78971  | 1,05 | up   |
| 6361270 | 7341999 | 1725065 | baculoviral IAP repeat-containing 3                   | Birc3    | 78971  | 1,25 | up   |
| 6630065 | 7341999 | 1725068 | baculoviral IAP repeat-containing 3                   | Birc3    | 78971  | 1,34 | up   |
| 6686061 | 7341999 | 1725067 | baculoviral IAP repeat-containing 3                   | Birc3    | 78971  | 1,15 | up   |
| 5770650 | 7096589 | 1118504 | BAlI-associated protein 2-like 1                      | Baiap211 | 304282 | 1,41 | down |
| 5848655 | 7096589 | 1118513 | BAlI-associated protein 2-like 1                      | Baiap211 | 304282 | 1,07 | down |
| 5895948 | 7096589 | 1118514 | BAlI-associated protein 2-like 1                      | Baiap211 | 304282 | 1,11 | down |
| 5987137 | 7096589 | 1118517 | BAlI-associated protein 2-like 1                      | Baiap211 | 304282 | 1,09 | up   |
| 6038878 | 7096589 | 1118520 | BAlI-associated protein 2-like 1                      | Baiap211 | 304282 | 2,20 | up   |
| 6039084 | 7096589 | 1118521 | BAlI-associated protein 2-like 1                      | Baiap211 | 304282 | 1,19 | up   |
| 6048217 | 7096589 | 1118524 | BAlI-associated protein 2-like 1                      | Baiap211 | 304282 | 1,51 | up   |
| 6189706 | 7096589 | 1118515 | BAlI-associated protein 2-like 1                      | Baiap211 | 304282 | 1,95 | up   |
| 6193479 | 7096589 | 1118507 | BAlI-associated protein 2-like 1                      | Baiap211 | 304282 | 1,43 | up   |
| 6227589 | 7096589 | 1118525 | BAlI-associated protein 2-like 1                      | Baiap211 | 304282 | 1,09 | down |
| 6286105 | 7096589 | 1118528 | BAlI-associated protein 2-like 1                      | Baiap211 | 304282 | 1,04 | up   |
| 6347987 | 7096589 | 1118527 | BAlI-associated protein 2-like 1                      | Baiap211 | 304282 | 1,13 | down |
| 6530182 | 7096589 | 1118506 | BAlI-associated protein 2-like 1                      | Baiap211 | 304282 | 1,31 | up   |
| 6540679 | 7096589 | 1118504 | BAlI-associated protein 2-like 1                      | Baiap211 | 304282 | 1,37 | down |
| 6559888 | 7096589 | 1118523 | BAlI-associated protein 2-like 1                      | Baiap211 | 304282 | 1,53 | up   |
| 6601871 | 7096589 | 1118529 | BAlI-associated protein 2-like 1                      | Baiap211 | 304282 | 1,08 | up   |
| 5873882 | 7257144 | 1515591 | basic helix-loop-helix domain containing, class B2    | Bhlhb2   | 79431  | 1,04 | up   |
| 6025454 | 7257144 | 1515593 | basic helix-loop-helix domain containing, class B2    | Bhlhb2   | 79431  | 1,51 | up   |
| 6096327 | 7257144 | 1515589 | basic helix-loop-helix domain containing, class B2    | Bhlhb2   | 79431  | 1,55 | down |
| 6151848 | 7257144 | 1515592 | basic helix-loop-helix domain containing, class B2    | Bhlhb2   | 79431  | 1,41 | up   |
| 6168974 | 7257144 | 1515590 | basic helix-loop-helix domain containing, class B2    | Bhlhb2   | 79431  | 1,15 | down |
| 6342762 | 7257144 | 1515589 | basic helix-loop-helix domain containing, class B2    | Bhlhb2   | 79431  | 2,97 | down |
| 6449214 | 7257144 | 1515593 | basic helix-loop-helix domain containing, class B2    | Bhlhb2   | 79431  | 1,30 | up   |
| 6629309 | 7257144 | 1515594 | basic helix-loop-helix domain containing, class B2    | Bhlhb2   | 79431  | 1,49 | up   |
| 6739864 | 7257144 | 1515594 | basic helix-loop-helix domain containing, class B2    | Bhlhb2   | 79431  | 1,22 | down |
| 6228697 | 7039265 | 983651  | basic leucine zipper transcription factor, ATF-like 2 | Batf2    | 309178 | 1,41 | down |
| 5641691 | 7350013 | 1745105 | bassoon                                               | Bsn      | 29138  | 2,15 | up   |
| 5698722 | 7350013 | 1745104 | bassoon                                               | Bsn      | 29138  | 1,19 | down |
| 5705398 | 7350013 | 1745100 | bassoon                                               | Bsn      | 29138  | 1,24 | down |
| 5720952 | 7350013 | 1745104 | bassoon                                               | Bsn      | 29138  | 1,17 | down |
| 5828150 | 7350013 | 1745103 | bassoon                                               | Bsn      | 29138  | 1,17 | up   |
| 5830951 | 7350013 | 1745103 | bassoon                                               | Bsn      | 29138  | 1,01 | down |

|         |         |         |                       |      |        |      |      |
|---------|---------|---------|-----------------------|------|--------|------|------|
| 5836239 | 7350013 | 1745106 | bassoon               | Bsn  | 29138  | 1,43 | down |
| 5865825 | 7350013 | 1745102 | bassoon               | Bsn  | 29138  | 1,10 | down |
| 5892281 | 7350013 | 1745094 | bassoon               | Bsn  | 29138  | 1,21 | down |
| 5895719 | 7350013 | 1745105 | bassoon               | Bsn  | 29138  | 1,16 | down |
| 5908937 | 7350013 | 1745102 | bassoon               | Bsn  | 29138  | 1,01 | up   |
| 5937362 | 7350013 | 1745103 | bassoon               | Bsn  | 29138  | 1,00 | down |
| 6012804 | 7350013 | 1745103 | bassoon               | Bsn  | 29138  | 1,22 | up   |
| 6063791 | 7350013 | 1745102 | bassoon               | Bsn  | 29138  | 1,15 | up   |
| 6089681 | 7350013 | 1745100 | bassoon               | Bsn  | 29138  | 1,49 | down |
| 6116675 | 7350013 | 1745103 | bassoon               | Bsn  | 29138  | 1,07 | up   |
| 6126843 | 7350013 | 1745103 | bassoon               | Bsn  | 29138  | 1,13 | up   |
| 6140172 | 7350013 | 1745103 | bassoon               | Bsn  | 29138  | 1,16 | up   |
| 6210515 | 7350013 | 1745106 | bassoon               | Bsn  | 29138  | 1,78 | up   |
| 6232096 | 7350013 | 1745102 | bassoon               | Bsn  | 29138  | 1,14 | up   |
| 6245190 | 7350013 | 1745100 | bassoon               | Bsn  | 29138  | 1,01 | up   |
| 6257855 | 7350013 | 1745101 | bassoon               | Bsn  | 29138  | 1,18 | down |
| 6331189 | 7350013 | 1745103 | bassoon               | Bsn  | 29138  | 1,02 | down |
| 6358295 | 7350013 | 1745097 | bassoon               | Bsn  | 29138  | 1,03 | up   |
| 6369551 | 7350013 | 1745107 | bassoon               | Bsn  | 29138  | 1,43 | up   |
| 6399327 | 7350013 | 1745103 | bassoon               | Bsn  | 29138  | 1,13 | down |
| 6406078 | 7350013 | 1745102 | bassoon               | Bsn  | 29138  | 1,28 | up   |
| 6413810 | 7350013 | 1745103 | bassoon               | Bsn  | 29138  | 1,18 | down |
| 6454328 | 7350013 | 1745098 | bassoon               | Bsn  | 29138  | 1,28 | down |
| 6458926 | 7350013 | 1745099 | bassoon               | Bsn  | 29138  | 1,05 | up   |
| 6460918 | 7350013 | 1745096 | bassoon               | Bsn  | 29138  | 1,01 | down |
| 6468579 | 7350013 | 1745106 | bassoon               | Bsn  | 29138  | 1,19 | down |
| 6479836 | 7350013 | 1745100 | bassoon               | Bsn  | 29138  | 1,01 | down |
| 6560669 | 7350013 | 1745102 | bassoon               | Bsn  | 29138  | 1,01 | up   |
| 6667391 | 7350013 | 1745103 | bassoon               | Bsn  | 29138  | 1,31 | down |
| 6675324 | 7350013 | 1745100 | bassoon               | Bsn  | 29138  | 1,01 | up   |
| 6693723 | 7350013 | 1745105 | bassoon               | Bsn  | 29138  | 1,18 | up   |
| 6740853 | 7350013 | 1745105 | bassoon               | Bsn  | 29138  | 2,95 | down |
| 5641634 | 7048723 | 1006955 | B-cell CLL/lymphoma 3 | Bcl3 | 680611 | 2,43 | up   |
| 5861046 | 7048723 | 1006951 | B-cell CLL/lymphoma 3 | Bcl3 | 680611 | 1,33 | down |
| 5877247 | 7048723 | 1006956 | B-cell CLL/lymphoma 3 | Bcl3 | 680611 | 1,65 | down |
| 5965197 | 7048723 | 1006948 | B-cell CLL/lymphoma 3 | Bcl3 | 680611 | 1,82 | up   |
| 6034429 | 7048723 | 1006953 | B-cell CLL/lymphoma 3 | Bcl3 | 680611 | 1,18 | down |
| 6076844 | 7048723 | 1006952 | B-cell CLL/lymphoma 3 | Bcl3 | 680611 | 2,59 | down |
| 6081744 | 7048723 | 1006950 | B-cell CLL/lymphoma 3 | Bcl3 | 680611 | 1,59 | up   |
| 6254187 | 7048723 | 1006949 | B-cell CLL/lymphoma 3 | Bcl3 | 680611 | 1,71 | down |
| 6429425 | 7048723 | 1006956 | B-cell CLL/lymphoma 3 | Bcl3 | 680611 | 8,26 | down |
| 6612212 | 7048723 | 1006954 | B-cell CLL/lymphoma 3 | Bcl3 | 680611 | 1,76 | up   |
| 5766406 | 7089381 | 1102061 | B-cell CLL/lymphoma 6 | Bcl6 | 303836 | 1,73 | up   |
| 5917864 | 7089381 | 1102068 | B-cell CLL/lymphoma 6 | Bcl6 | 303836 | 1,58 | down |
| 5969886 | 7089381 | 1102068 | B-cell CLL/lymphoma 6 | Bcl6 | 303836 | 1,17 | down |
| 6045539 | 7089381 | 1102062 | B-cell CLL/lymphoma 6 | Bcl6 | 303836 | 1,54 | up   |
| 6101921 | 7089381 | 1102057 | B-cell CLL/lymphoma 6 | Bcl6 | 303836 | 1,66 | down |
| 6188794 | 7089381 | 1102063 | B-cell CLL/lymphoma 6 | Bcl6 | 303836 | 1,20 | up   |
| 6195062 | 7089381 | 1102059 | B-cell CLL/lymphoma 6 | Bcl6 | 303836 | 1,34 | up   |
| 6471339 | 7089381 | 1102066 | B-cell CLL/lymphoma 6 | Bcl6 | 303836 | 1,02 | up   |
| 6529016 | 7089381 | 1102063 | B-cell CLL/lymphoma 6 | Bcl6 | 303836 | 1,83 | up   |
| 6539940 | 7089381 | 1102060 | B-cell CLL/lymphoma 6 | Bcl6 | 303836 | 1,31 | up   |
| 6576071 | 7089381 | 1102065 | B-cell CLL/lymphoma 6 | Bcl6 | 303836 | 1,12 | down |
| 6655429 | 7089381 | 1102068 | B-cell CLL/lymphoma 6 | Bcl6 | 303836 | 1,67 | down |
| 6745765 | 7089381 | 1102068 | B-cell CLL/lymphoma 6 | Bcl6 | 303836 | 1,75 | down |
| 5673802 | 7062529 | 1037852 | B-cell linker         | Blnk | 499356 | 1,37 | up   |

|         |         |         |                                              |        |        |      |      |
|---------|---------|---------|----------------------------------------------|--------|--------|------|------|
| 5789007 | 7062529 | 1037861 | B-cell linker                                | Blnk   | 499356 | 1,26 | up   |
| 5814820 | 7062529 | 1037877 | B-cell linker                                | Blnk   | 499356 | 1,58 | up   |
| 5866512 | 7062529 | 1037855 | B-cell linker                                | Blnk   | 499356 | 1,07 | up   |
| 5868280 | 7062529 | 1037856 | B-cell linker                                | Blnk   | 499356 | 1,16 | up   |
| 5888776 | 7062529 | 1037870 | B-cell linker                                | Blnk   | 499356 | 1,02 | up   |
| 5927608 | 7062529 | 1037859 | B-cell linker                                | Blnk   | 499356 | 1,22 | down |
| 6006276 | 7062529 | 1037876 | B-cell linker                                | Blnk   | 499356 | 1,07 | down |
| 6008406 | 7062529 | 1037873 | B-cell linker                                | Blnk   | 499356 | 3,06 | up   |
| 6125166 | 7062529 | 1037869 | B-cell linker                                | Blnk   | 499356 | 1,42 | up   |
| 6199150 | 7062529 | 1037854 | B-cell linker                                | Blnk   | 499356 | 1,03 | up   |
| 6336151 | 7062529 | 1037853 | B-cell linker                                | Blnk   | 499356 | 1,16 | up   |
| 6574083 | 7062529 | 1037850 | B-cell linker                                | Blnk   | 499356 | 1,31 | up   |
| 6645006 | 7062529 | 1037868 | B-cell linker                                | Blnk   | 499356 | 1,47 | up   |
| 6707089 | 7062529 | 1037875 | B-cell linker                                | Blnk   | 499356 | 1,10 | up   |
| 6724373 | 7062529 | 1037850 | B-cell linker                                | Blnk   | 499356 | 1,15 | down |
| 5774276 | 7221055 | 1425394 | BCL2-antagonist/killer 1                     | Bak1   | 116502 | 2,27 | down |
| 5815221 | 7221055 | 1425391 | BCL2-antagonist/killer 1                     | Bak1   | 116502 | 1,15 | up   |
| 5881396 | 7221055 | 1425395 | BCL2-antagonist/killer 1                     | Bak1   | 116502 | 1,77 | down |
| 5891981 | 7221055 | 1425390 | BCL2-antagonist/killer 1                     | Bak1   | 116502 | 1,24 | up   |
| 6194540 | 7221055 | 1425390 | BCL2-antagonist/killer 1                     | Bak1   | 116502 | 1,23 | down |
| 6199140 | 7221055 | 1425390 | BCL2-antagonist/killer 1                     | Bak1   | 116502 | 1,40 | up   |
| 6213226 | 7221055 | 1425394 | BCL2-antagonist/killer 1                     | Bak1   | 116502 | 2,42 | down |
| 6262184 | 7221055 | 1425392 | BCL2-antagonist/killer 1                     | Bak1   | 116502 | 1,05 | down |
| 6307232 | 7221055 | 1425391 | BCL2-antagonist/killer 1                     | Bak1   | 116502 | 1,05 | up   |
| 6402587 | 7221055 | 1425393 | BCL2-antagonist/killer 1                     | Bak1   | 116502 | 1,64 | down |
| 5757574 | 7356077 | 1760061 | BCS1-like (yeast)                            | Bcs1l  | 301514 | 1,10 | up   |
| 5771028 | 7356077 | 1760061 | BCS1-like (yeast)                            | Bcs1l  | 301514 | 1,40 | up   |
| 6023262 | 7356077 | 1760066 | BCS1-like (yeast)                            | Bcs1l  | 301514 | 1,08 | up   |
| 6048565 | 7356077 | 1760064 | BCS1-like (yeast)                            | Bcs1l  | 301514 | 1,06 | up   |
| 6322722 | 7356077 | 1760067 | BCS1-like (yeast)                            | Bcs1l  | 301514 | 1,25 | up   |
| 6429811 | 7356077 | 1760065 | BCS1-like (yeast)                            | Bcs1l  | 301514 | 2,20 | down |
| 6538418 | 7356077 | 1760063 | BCS1-like (yeast)                            | Bcs1l  | 301514 | 1,30 | up   |
| 6560913 | 7356077 | 1760062 | BCS1-like (yeast)                            | Bcs1l  | 301514 | 2,14 | down |
| 6684823 | 7356077 | 1760068 | BCS1-like (yeast)                            | Bcs1l  | 301514 | 1,17 | down |
| 6742950 | 7356077 | 1760061 | BCS1-like (yeast)                            | Bcs1l  | 301514 | 1,02 | down |
| 5687345 | 7082845 | 1085814 | beclin 1, autophagy related                  | Becn1  | 114558 | 1,17 | up   |
| 5705604 | 7082845 | 1085813 | beclin 1, autophagy related                  | Becn1  | 114558 | 1,11 | down |
| 5742337 | 7082845 | 1085804 | beclin 1, autophagy related                  | Becn1  | 114558 | 1,10 | up   |
| 5773575 | 7082845 | 1085812 | beclin 1, autophagy related                  | Becn1  | 114558 | 1,43 | down |
| 5800062 | 7082845 | 1085809 | beclin 1, autophagy related                  | Becn1  | 114558 | 1,15 | up   |
| 5832164 | 7082845 | 1085805 | beclin 1, autophagy related                  | Becn1  | 114558 | 1,07 | down |
| 5841950 | 7082845 | 1085811 | beclin 1, autophagy related                  | Becn1  | 114558 | 1,23 | up   |
| 6090849 | 7082845 | 1085814 | beclin 1, autophagy related                  | Becn1  | 114558 | 1,16 | down |
| 6158880 | 7082845 | 1085807 | beclin 1, autophagy related                  | Becn1  | 114558 | 1,05 | up   |
| 6254940 | 7082845 | 1085808 | beclin 1, autophagy related                  | Becn1  | 114558 | 1,54 | down |
| 6552582 | 7082845 | 1085806 | beclin 1, autophagy related                  | Becn1  | 114558 | 1,17 | down |
| 6580335 | 7082845 | 1085810 | beclin 1, autophagy related                  | Becn1  | 114558 | 1,08 | up   |
| 6619510 | 7082845 | 1085809 | beclin 1, autophagy related                  | Becn1  | 114558 | 1,12 | up   |
| 6702984 | 7082845 | 1085803 | beclin 1, autophagy related                  | Becn1  | 114558 | 2,33 | up   |
| 5626575 | 7070869 | 1058489 | benzodiazapine receptor associated protein 1 | Bzrap1 | 287609 | 1,08 | down |
| 5627395 | 7070869 | 1058498 | benzodiazapine receptor associated protein 1 | Bzrap1 | 287609 | 1,07 | down |
| 5640104 | 7070869 | 1058496 | benzodiazapine receptor associated protein 1 | Bzrap1 | 287609 | 1,07 | down |
| 5684840 | 7070869 | 1058489 | benzodiazapine receptor associated protein 1 | Bzrap1 | 287609 | 2,41 | down |
| 5704883 | 7070869 | 1058499 | benzodiazapine receptor associated protein 1 | Bzrap1 | 287609 | 1,13 | up   |
| 5754964 | 7070869 | 1058478 | benzodiazapine receptor associated protein 1 | Bzrap1 | 287609 | 1,02 | down |
| 5763484 | 7070869 | 1058474 | benzodiazapine receptor associated protein 1 | Bzrap1 | 287609 | 1,59 | down |

|         |         |         |                                                   |       |        |      |      |
|---------|---------|---------|---------------------------------------------------|-------|--------|------|------|
| 5780184 | 7070869 | 1058491 | benzodiazapine receptor associated protein 1      | Bzap1 | 287609 | 1,05 | up   |
| 5789564 | 7070869 | 1058480 | benzodiazapine receptor associated protein 1      | Bzap1 | 287609 | 1,20 | down |
| 5820327 | 7070869 | 1058472 | benzodiazapine receptor associated protein 1      | Bzap1 | 287609 | 1,02 | down |
| 5827261 | 7070869 | 1058482 | benzodiazapine receptor associated protein 1      | Bzap1 | 287609 | 1,32 | down |
| 5899060 | 7070869 | 1058495 | benzodiazapine receptor associated protein 1      | Bzap1 | 287609 | 1,01 | up   |
| 5922070 | 7070869 | 1058488 | benzodiazapine receptor associated protein 1      | Bzap1 | 287609 | 1,14 | up   |
| 5922451 | 7070869 | 1058481 | benzodiazapine receptor associated protein 1      | Bzap1 | 287609 | 1,23 | down |
| 5929812 | 7070869 | 1058493 | benzodiazapine receptor associated protein 1      | Bzap1 | 287609 | 1,71 | down |
| 5962074 | 7070869 | 1058484 | benzodiazapine receptor associated protein 1      | Bzap1 | 287609 | 1,12 | down |
| 6005727 | 7070869 | 1058490 | benzodiazapine receptor associated protein 1      | Bzap1 | 287609 | 1,24 | down |
| 6009592 | 7070869 | 1058479 | benzodiazapine receptor associated protein 1      | Bzap1 | 287609 | 1,76 | up   |
| 6027533 | 7070869 | 1058473 | benzodiazapine receptor associated protein 1      | Bzap1 | 287609 | 1,17 | up   |
| 6034938 | 7070869 | 1058492 | benzodiazapine receptor associated protein 1      | Bzap1 | 287609 | 1,26 | down |
| 6081799 | 7070869 | 1058495 | benzodiazapine receptor associated protein 1      | Bzap1 | 287609 | 1,19 | down |
| 6119117 | 7070869 | 1058502 | benzodiazapine receptor associated protein 1      | Bzap1 | 287609 | 1,05 | down |
| 6232646 | 7070869 | 1058476 | benzodiazapine receptor associated protein 1      | Bzap1 | 287609 | 1,31 | down |
| 6279229 | 7070869 | 1058487 | benzodiazapine receptor associated protein 1      | Bzap1 | 287609 | 1,32 | down |
| 6285270 | 7070869 | 1058497 | benzodiazapine receptor associated protein 1      | Bzap1 | 287609 | 1,09 | up   |
| 6292670 | 7070869 | 1058489 | benzodiazapine receptor associated protein 1      | Bzap1 | 287609 | 2,00 | up   |
| 6304830 | 7070869 | 1058489 | benzodiazapine receptor associated protein 1      | Bzap1 | 287609 | 1,14 | up   |
| 6310859 | 7070869 | 1058494 | benzodiazapine receptor associated protein 1      | Bzap1 | 287609 | 1,13 | up   |
| 6320000 | 7070869 | 1058484 | benzodiazapine receptor associated protein 1      | Bzap1 | 287609 | 1,66 | up   |
| 6362265 | 7070869 | 1058470 | benzodiazapine receptor associated protein 1      | Bzap1 | 287609 | 1,10 | up   |
| 6371044 | 7070869 | 1058485 | benzodiazapine receptor associated protein 1      | Bzap1 | 287609 | 1,60 | up   |
| 6402640 | 7070869 | 1058475 | benzodiazapine receptor associated protein 1      | Bzap1 | 287609 | 2,91 | up   |
| 6416499 | 7070869 | 1058474 | benzodiazapine receptor associated protein 1      | Bzap1 | 287609 | 1,10 | up   |
| 6433193 | 7070869 | 1058471 | benzodiazapine receptor associated protein 1      | Bzap1 | 287609 | 1,03 | up   |
| 6481950 | 7070869 | 1058482 | benzodiazapine receptor associated protein 1      | Bzap1 | 287609 | 1,20 | up   |
| 6488072 | 7070869 | 1058501 | benzodiazapine receptor associated protein 1      | Bzap1 | 287609 | 1,11 | up   |
| 6528589 | 7070869 | 1058491 | benzodiazapine receptor associated protein 1      | Bzap1 | 287609 | 2,14 | up   |
| 6568261 | 7070869 | 1058502 | benzodiazapine receptor associated protein 1      | Bzap1 | 287609 | 1,16 | up   |
| 6606592 | 7070869 | 1058481 | benzodiazapine receptor associated protein 1      | Bzap1 | 287609 | 1,07 | down |
| 6611256 | 7070869 | 1058491 | benzodiazapine receptor associated protein 1      | Bzap1 | 287609 | 1,54 | up   |
| 6618242 | 7070869 | 1058486 | benzodiazapine receptor associated protein 1      | Bzap1 | 287609 | 1,01 | up   |
| 6640851 | 7070869 | 1058477 | benzodiazapine receptor associated protein 1      | Bzap1 | 287609 | 1,15 | up   |
| 6650806 | 7070869 | 1058491 | benzodiazapine receptor associated protein 1      | Bzap1 | 287609 | 1,07 | up   |
| 6695811 | 7070869 | 1058502 | benzodiazapine receptor associated protein 1      | Bzap1 | 287609 | 1,49 | up   |
| 6698355 | 7070869 | 1058491 | benzodiazapine receptor associated protein 1      | Bzap1 | 287609 | 1,17 | up   |
| 6716118 | 7070869 | 1058491 | benzodiazapine receptor associated protein 1      | Bzap1 | 287609 | 1,19 | down |
| 5958215 | 7315206 | 1660010 | bestrophin 3                                      | Best3 | 314847 | 1,62 | up   |
| 6144221 | 7315206 | 1660034 | bestrophin 3                                      | Best3 | 314847 | 1,55 | up   |
| 5716476 | 7335700 | 1708717 | beta-site APP cleaving enzyme 1                   | Bace1 | 29392  | 1,15 | down |
| 5757380 | 7335700 | 1708719 | beta-site APP cleaving enzyme 1                   | Bace1 | 29392  | 1,15 | up   |
| 5864172 | 7335700 | 1708720 | beta-site APP cleaving enzyme 1                   | Bace1 | 29392  | 1,25 | up   |
| 6006335 | 7335700 | 1708723 | beta-site APP cleaving enzyme 1                   | Bace1 | 29392  | 1,05 | down |
| 6030772 | 7335700 | 1708722 | beta-site APP cleaving enzyme 1                   | Bace1 | 29392  | 1,14 | up   |
| 6183129 | 7335700 | 1708718 | beta-site APP cleaving enzyme 1                   | Bace1 | 29392  | 1,35 | down |
| 6219484 | 7335700 | 1708717 | beta-site APP cleaving enzyme 1                   | Bace1 | 29392  | 1,01 | down |
| 6325359 | 7335700 | 1708724 | beta-site APP cleaving enzyme 1                   | Bace1 | 29392  | 1,01 | down |
| 6690501 | 7335700 | 1708721 | beta-site APP cleaving enzyme 1                   | Bace1 | 29392  | 1,10 | down |
| 6742441 | 7335700 | 1708725 | beta-site APP cleaving enzyme 1                   | Bace1 | 29392  | 1,01 | down |
| 5994249 | 7029985 | 960593  | biliverdin reductase B (flavin reductase (NADPH)) | Blvrb | 292737 | 1,13 | down |
| 6010870 | 7029985 | 960591  | biliverdin reductase B (flavin reductase (NADPH)) | Blvrb | 292737 | 1,62 | up   |
| 6205377 | 7029985 | 960587  | biliverdin reductase B (flavin reductase (NADPH)) | Blvrb | 292737 | 1,14 | down |
| 6305467 | 7029985 | 960595  | biliverdin reductase B (flavin reductase (NADPH)) | Blvrb | 292737 | 1,06 | down |
| 6348597 | 7029985 | 960596  | biliverdin reductase B (flavin reductase (NADPH)) | Blvrb | 292737 | 1,21 | up   |

|         |         |         |                                                   |        |        |      |      |
|---------|---------|---------|---------------------------------------------------|--------|--------|------|------|
| 6469418 | 7029985 | 960594  | biliverdin reductase B (flavin reductase (NADPH)) | Blvrb  | 292737 | 1,06 | down |
| 6501712 | 7029985 | 960587  | biliverdin reductase B (flavin reductase (NADPH)) | Blvrb  | 292737 | 2,59 | down |
| 6190414 | 7143272 | 1234232 | biotinidase                                       | Btd    | 306262 | 1,04 | down |
| 6349016 | 7143272 | 1234234 | biotinidase                                       | Btd    | 306262 | 1,01 | up   |
| 6359537 | 7143272 | 1234233 | biotinidase                                       | Btd    | 306262 | 1,73 | down |
| 6531742 | 7143272 | 1234231 | biotinidase                                       | Btd    | 306262 | 1,05 | down |
| 5648570 | 7123421 | 1185825 | BMP-2 inducible kinase                            | Bmp2k  | 498333 | 1,11 | down |
| 5669317 | 7123421 | 1185828 | BMP-2 inducible kinase                            | Bmp2k  | 498333 | 1,16 | down |
| 5852853 | 7123421 | 1185830 | BMP-2 inducible kinase                            | Bmp2k  | 498333 | 1,01 | down |
| 6041602 | 7123421 | 1185812 | BMP-2 inducible kinase                            | Bmp2k  | 498333 | 1,08 | up   |
| 6046971 | 7123421 | 1185834 | BMP-2 inducible kinase                            | Bmp2k  | 498333 | 1,22 | up   |
| 6086567 | 7123421 | 1185839 | BMP-2 inducible kinase                            | Bmp2k  | 498333 | 1,27 | up   |
| 6116793 | 7123421 | 1185840 | BMP-2 inducible kinase                            | Bmp2k  | 498333 | 1,10 | up   |
| 6356223 | 7123421 | 1185825 | BMP-2 inducible kinase                            | Bmp2k  | 498333 | 2,23 | down |
| 6361680 | 7123421 | 1185831 | BMP-2 inducible kinase                            | Bmp2k  | 498333 | 1,21 | down |
| 6391620 | 7123421 | 1185831 | BMP-2 inducible kinase                            | Bmp2k  | 498333 | 1,25 | up   |
| 6480892 | 7123421 | 1185825 | BMP-2 inducible kinase                            | Bmp2k  | 498333 | 1,24 | down |
| 6526284 | 7123421 | 1185821 | BMP-2 inducible kinase                            | Bmp2k  | 498333 | 1,35 | down |
| 6536991 | 7123421 | 1185833 | BMP-2 inducible kinase                            | Bmp2k  | 498333 | 1,00 | up   |
| 6631080 | 7123421 | 1185821 | BMP-2 inducible kinase                            | Bmp2k  | 498333 | 1,07 | down |
| 6746852 | 7123421 | 1185836 | BMP-2 inducible kinase                            | Bmp2k  | 498333 | 1,24 | up   |
| 5704805 | 7087805 | 1097501 | bobby sox homolog (Drosophila)                    | Bbx    | 303970 | 1,05 | down |
| 5755850 | 7087805 | 1097500 | bobby sox homolog (Drosophila)                    | Bbx    | 303970 | 1,04 | up   |
| 5800373 | 7087805 | 1097469 | bobby sox homolog (Drosophila)                    | Bbx    | 303970 | 1,32 | down |
| 5931738 | 7087805 | 1097484 | bobby sox homolog (Drosophila)                    | Bbx    | 303970 | 1,04 | up   |
| 5984582 | 7087805 | 1097490 | bobby sox homolog (Drosophila)                    | Bbx    | 303970 | 1,02 | up   |
| 5991481 | 7087805 | 1097492 | bobby sox homolog (Drosophila)                    | Bbx    | 303970 | 1,05 | up   |
| 5999814 | 7087805 | 1097500 | bobby sox homolog (Drosophila)                    | Bbx    | 303970 | 1,30 | up   |
| 6116530 | 7087805 | 1097491 | bobby sox homolog (Drosophila)                    | Bbx    | 303970 | 1,01 | up   |
| 6155466 | 7087805 | 1097488 | bobby sox homolog (Drosophila)                    | Bbx    | 303970 | 1,04 | down |
| 6157568 | 7087805 | 1097482 | bobby sox homolog (Drosophila)                    | Bbx    | 303970 | 1,06 | down |
| 6503774 | 7087805 | 1097502 | bobby sox homolog (Drosophila)                    | Bbx    | 303970 | 1,24 | up   |
| 6506440 | 7087805 | 1097495 | bobby sox homolog (Drosophila)                    | Bbx    | 303970 | 1,00 | down |
| 6571664 | 7087805 | 1097477 | bobby sox homolog (Drosophila)                    | Bbx    | 303970 | 1,44 | up   |
| 6688404 | 7087805 | 1097478 | bobby sox homolog (Drosophila)                    | Bbx    | 303970 | 1,09 | down |
| 6693879 | 7087805 | 1097484 | bobby sox homolog (Drosophila)                    | Bbx    | 303970 | 1,15 | up   |
| 6699939 | 7087805 | 1097493 | bobby sox homolog (Drosophila)                    | Bbx    | 303970 | 2,03 | up   |
| 6709994 | 7087805 | 1097492 | bobby sox homolog (Drosophila)                    | Bbx    | 303970 | 1,06 | down |
| 6739111 | 7087805 | 1097499 | bobby sox homolog (Drosophila)                    | Bbx    | 303970 | 1,22 | down |
| 5828180 | 7210637 | 1400603 | bone gamma-carboxyglutamate (gla) protein         | Bglap  | 25295  | 1,31 | up   |
| 5876615 | 7210637 | 1400606 | bone gamma-carboxyglutamate (gla) protein         | Bglap  | 25295  | 1,03 | up   |
| 5894046 | 7210637 | 1400602 | bone gamma-carboxyglutamate (gla) protein         | Bglap  | 25295  | 1,09 | up   |
| 5968250 | 7210637 | 1400606 | bone gamma-carboxyglutamate (gla) protein         | Bglap  | 25295  | 1,15 | up   |
| 6095204 | 7210637 | 1400604 | bone gamma-carboxyglutamate (gla) protein         | Bglap  | 25295  | 1,26 | down |
| 6735087 | 7210637 | 1400605 | bone gamma-carboxyglutamate (gla) protein         | Bglap  | 25295  | 2,04 | down |
| 5713732 | 7249102 | 1495258 | brain derived neurotrophic factor                 | Bdnf   | 24225  | 1,05 | down |
| 5977234 | 7249102 | 1495257 | brain derived neurotrophic factor                 | Bdnf   | 24225  | 2,09 | down |
| 6172103 | 7249102 | 1495256 | brain derived neurotrophic factor                 | Bdnf   | 24225  | 2,23 | down |
| 6199817 | 7249102 | 1495259 | brain derived neurotrophic factor                 | Bdnf   | 24225  | 1,04 | up   |
| 6465105 | 7249102 | 1495258 | brain derived neurotrophic factor                 | Bdnf   | 24225  | 1,05 | up   |
| 6530638 | 7249102 | 1495257 | brain derived neurotrophic factor                 | Bdnf   | 24225  | 1,16 | up   |
| 6565868 | 7249102 | 1495259 | brain derived neurotrophic factor                 | Bdnf   | 24225  | 1,23 | up   |
| 6622801 | 7249102 | 1495259 | brain derived neurotrophic factor                 | Bdnf   | 24225  | 1,17 | up   |
| 6640186 | 7249102 | 1495255 | brain derived neurotrophic factor                 | Bdnf   | 24225  | 1,18 | down |
| 5643796 | 7046645 | 1002597 | brain protein 44-like                             | Brp441 | 171087 | 1,14 | down |
| 6000181 | 7046645 | 1002594 | brain protein 44-like                             | Brp441 | 171087 | 2,16 | up   |

|         |         |         |                                              |        |        |      |      |
|---------|---------|---------|----------------------------------------------|--------|--------|------|------|
| 6175554 | 7046645 | 1002595 | brain protein 44-like                        | Brp441 | 171087 | 1,01 | down |
| 6179701 | 7046645 | 1002596 | brain protein 44-like                        | Brp441 | 171087 | 1,10 | down |
| 6272184 | 7046645 | 1002594 | brain protein 44-like                        | Brp441 | 171087 | 1,15 | up   |
| 6637130 | 7046645 | 1002597 | brain protein 44-like                        | Brp441 | 171087 | 2,37 | up   |
| 5636403 | 7279881 | 1572723 | brain-specific angiogenesis inhibitor 2      | Bai2   | 313058 | 1,19 | up   |
| 5648745 | 7279881 | 1572741 | brain-specific angiogenesis inhibitor 2      | Bai2   | 313058 | 1,16 | down |
| 5662188 | 7279881 | 1572737 | brain-specific angiogenesis inhibitor 2      | Bai2   | 313058 | 1,08 | down |
| 5793187 | 7279881 | 1572731 | brain-specific angiogenesis inhibitor 2      | Bai2   | 313058 | 1,44 | down |
| 5829650 | 7279881 | 1572734 | brain-specific angiogenesis inhibitor 2      | Bai2   | 313058 | 1,29 | up   |
| 5895152 | 7279881 | 1572716 | brain-specific angiogenesis inhibitor 2      | Bai2   | 313058 | 1,21 | down |
| 5938534 | 7279881 | 1572722 | brain-specific angiogenesis inhibitor 2      | Bai2   | 313058 | 3,11 | down |
| 5963378 | 7279881 | 1572746 | brain-specific angiogenesis inhibitor 2      | Bai2   | 313058 | 1,02 | up   |
| 5976103 | 7279881 | 1572724 | brain-specific angiogenesis inhibitor 2      | Bai2   | 313058 | 1,50 | down |
| 6009735 | 7279881 | 1572716 | brain-specific angiogenesis inhibitor 2      | Bai2   | 313058 | 1,03 | up   |
| 6056548 | 7279881 | 1572743 | brain-specific angiogenesis inhibitor 2      | Bai2   | 313058 | 1,09 | up   |
| 6066592 | 7279881 | 1572730 | brain-specific angiogenesis inhibitor 2      | Bai2   | 313058 | 1,04 | down |
| 6115306 | 7279881 | 1572747 | brain-specific angiogenesis inhibitor 2      | Bai2   | 313058 | 1,13 | up   |
| 6238558 | 7279881 | 1572736 | brain-specific angiogenesis inhibitor 2      | Bai2   | 313058 | 1,35 | down |
| 6365374 | 7279881 | 1572738 | brain-specific angiogenesis inhibitor 2      | Bai2   | 313058 | 1,56 | down |
| 6370572 | 7279881 | 1572738 | brain-specific angiogenesis inhibitor 2      | Bai2   | 313058 | 1,03 | down |
| 6385731 | 7279881 | 1572733 | brain-specific angiogenesis inhibitor 2      | Bai2   | 313058 | 1,33 | down |
| 6427637 | 7279881 | 1572745 | brain-specific angiogenesis inhibitor 2      | Bai2   | 313058 | 1,28 | up   |
| 6432046 | 7279881 | 1572736 | brain-specific angiogenesis inhibitor 2      | Bai2   | 313058 | 1,04 | up   |
| 6463420 | 7279881 | 1572729 | brain-specific angiogenesis inhibitor 2      | Bai2   | 313058 | 1,28 | down |
| 6486360 | 7279881 | 1572732 | brain-specific angiogenesis inhibitor 2      | Bai2   | 313058 | 1,53 | down |
| 6552665 | 7279881 | 1572719 | brain-specific angiogenesis inhibitor 2      | Bai2   | 313058 | 1,02 | up   |
| 6557309 | 7279881 | 1572729 | brain-specific angiogenesis inhibitor 2      | Bai2   | 313058 | 1,37 | down |
| 6582005 | 7279881 | 1572726 | brain-specific angiogenesis inhibitor 2      | Bai2   | 313058 | 1,17 | up   |
| 6585941 | 7279881 | 1572746 | brain-specific angiogenesis inhibitor 2      | Bai2   | 313058 | 1,20 | down |
| 6619332 | 7279881 | 1572742 | brain-specific angiogenesis inhibitor 2      | Bai2   | 313058 | 1,51 | up   |
| 6627103 | 7279881 | 1572716 | brain-specific angiogenesis inhibitor 2      | Bai2   | 313058 | 1,19 | down |
| 6627269 | 7279881 | 1572740 | brain-specific angiogenesis inhibitor 2      | Bai2   | 313058 | 1,36 | up   |
| 6656478 | 7279881 | 1572721 | brain-specific angiogenesis inhibitor 2      | Bai2   | 313058 | 1,18 | up   |
| 6658118 | 7279881 | 1572728 | brain-specific angiogenesis inhibitor 2      | Bai2   | 313058 | 1,10 | down |
| 6674694 | 7279881 | 1572736 | brain-specific angiogenesis inhibitor 2      | Bai2   | 313058 | 1,00 | down |
| 6686149 | 7279881 | 1572727 | brain-specific angiogenesis inhibitor 2      | Bai2   | 313058 | 1,08 | up   |
| 6700090 | 7279881 | 1572744 | brain-specific angiogenesis inhibitor 2      | Bai2   | 313058 | 1,28 | down |
| 6709056 | 7279881 | 1572720 | brain-specific angiogenesis inhibitor 2      | Bai2   | 313058 | 1,07 | up   |
| 6739885 | 7279881 | 1572725 | brain-specific angiogenesis inhibitor 2      | Bai2   | 313058 | 1,02 | down |
| 5846101 | 7271115 | 1550297 | branched chain aminotransferase 1, cytosolic | Bcat1  | 29592  | 1,03 | up   |
| 5850843 | 7271115 | 1550299 | branched chain aminotransferase 1, cytosolic | Bcat1  | 29592  | 2,03 | down |
| 5885046 | 7271115 | 1550296 | branched chain aminotransferase 1, cytosolic | Bcat1  | 29592  | 1,22 | up   |
| 5951501 | 7271115 | 1550289 | branched chain aminotransferase 1, cytosolic | Bcat1  | 29592  | 1,12 | down |
| 6001757 | 7271115 | 1550292 | branched chain aminotransferase 1, cytosolic | Bcat1  | 29592  | 1,11 | up   |
| 6093308 | 7271115 | 1550295 | branched chain aminotransferase 1, cytosolic | Bcat1  | 29592  | 1,20 | up   |
| 6145812 | 7271115 | 1550293 | branched chain aminotransferase 1, cytosolic | Bcat1  | 29592  | 1,11 | up   |
| 6264997 | 7271115 | 1550289 | branched chain aminotransferase 1, cytosolic | Bcat1  | 29592  | 1,09 | up   |
| 6274057 | 7271115 | 1550289 | branched chain aminotransferase 1, cytosolic | Bcat1  | 29592  | 1,16 | down |
| 6307065 | 7271115 | 1550298 | branched chain aminotransferase 1, cytosolic | Bcat1  | 29592  | 1,61 | down |
| 6321141 | 7271115 | 1550294 | branched chain aminotransferase 1, cytosolic | Bcat1  | 29592  | 1,15 | down |
| 6416046 | 7271115 | 1550297 | branched chain aminotransferase 1, cytosolic | Bcat1  | 29592  | 1,03 | up   |
| 6558376 | 7271115 | 1550291 | branched chain aminotransferase 1, cytosolic | Bcat1  | 29592  | 1,07 | down |
| 6629637 | 7271115 | 1550289 | branched chain aminotransferase 1, cytosolic | Bcat1  | 29592  | 1,17 | down |
| 6742745 | 7271115 | 1550290 | branched chain aminotransferase 1, cytosolic | Bcat1  | 29592  | 1,25 | up   |
| 5628013 | 7099740 | 1127037 | breast cancer 2                              | Brca2  | 360254 | 1,66 | up   |
| 5631527 | 7099740 | 1127028 | breast cancer 2                              | Brca2  | 360254 | 1,48 | up   |



|         |         |         |                                          |       |        |      |      |
|---------|---------|---------|------------------------------------------|-------|--------|------|------|
| 5650709 | 7099740 | 1127042 | breast cancer 2                          | Brca2 | 360254 | 1,03 | down |
| 5686870 | 7099740 | 1127044 | breast cancer 2                          | Brca2 | 360254 | 1,11 | down |
| 5697050 | 7099740 | 1127025 | breast cancer 2                          | Brca2 | 360254 | 1,04 | down |
| 5743292 | 7099740 | 1127036 | breast cancer 2                          | Brca2 | 360254 | 1,14 | up   |
| 5831936 | 7099740 | 1127032 | breast cancer 2                          | Brca2 | 360254 | 1,26 | down |
| 5911312 | 7099740 | 1127043 | breast cancer 2                          | Brca2 | 360254 | 1,92 | up   |
| 5911745 | 7099740 | 1127038 | breast cancer 2                          | Brca2 | 360254 | 1,08 | up   |
| 5918881 | 7099740 | 1127048 | breast cancer 2                          | Brca2 | 360254 | 1,04 | down |
| 5936251 | 7099740 | 1127030 | breast cancer 2                          | Brca2 | 360254 | 1,35 | up   |
| 5946216 | 7099740 | 1127034 | breast cancer 2                          | Brca2 | 360254 | 1,30 | up   |
| 5951591 | 7099740 | 1127040 | breast cancer 2                          | Brca2 | 360254 | 1,76 | down |
| 5972281 | 7099740 | 1127043 | breast cancer 2                          | Brca2 | 360254 | 1,16 | down |
| 5977931 | 7099740 | 1127042 | breast cancer 2                          | Brca2 | 360254 | 1,16 | down |
| 5995559 | 7099740 | 1127041 | breast cancer 2                          | Brca2 | 360254 | 1,09 | down |
| 6087008 | 7099740 | 1127047 | breast cancer 2                          | Brca2 | 360254 | 1,02 | up   |
| 6103446 | 7099740 | 1127049 | breast cancer 2                          | Brca2 | 360254 | 1,20 | up   |
| 6114511 | 7099740 | 1127051 | breast cancer 2                          | Brca2 | 360254 | 1,04 | down |
| 6124937 | 7099740 | 1127044 | breast cancer 2                          | Brca2 | 360254 | 1,34 | down |
| 6133824 | 7099740 | 1127042 | breast cancer 2                          | Brca2 | 360254 | 1,10 | down |
| 6135414 | 7099740 | 1127036 | breast cancer 2                          | Brca2 | 360254 | 1,02 | down |
| 6181501 | 7099740 | 1127048 | breast cancer 2                          | Brca2 | 360254 | 2,24 | up   |
| 6212655 | 7099740 | 1127027 | breast cancer 2                          | Brca2 | 360254 | 1,35 | down |
| 6312776 | 7099740 | 1127045 | breast cancer 2                          | Brca2 | 360254 | 1,21 | down |
| 6322876 | 7099740 | 1127046 | breast cancer 2                          | Brca2 | 360254 | 1,15 | down |
| 6332852 | 7099740 | 1127026 | breast cancer 2                          | Brca2 | 360254 | 1,08 | down |
| 6351044 | 7099740 | 1127050 | breast cancer 2                          | Brca2 | 360254 | 1,04 | up   |
| 6385865 | 7099740 | 1127033 | breast cancer 2                          | Brca2 | 360254 | 1,01 | up   |
| 6412867 | 7099740 | 1127026 | breast cancer 2                          | Brca2 | 360254 | 1,31 | up   |
| 6432522 | 7099740 | 1127039 | breast cancer 2                          | Brca2 | 360254 | 1,18 | up   |
| 6482709 | 7099740 | 1127031 | breast cancer 2                          | Brca2 | 360254 | 1,01 | down |
| 6567034 | 7099740 | 1127029 | breast cancer 2                          | Brca2 | 360254 | 1,20 | down |
| 6633330 | 7099740 | 1127035 | breast cancer 2                          | Brca2 | 360254 | 1,34 | down |
| 6636258 | 7099740 | 1127042 | breast cancer 2                          | Brca2 | 360254 | 1,26 | up   |
| 6673276 | 7099740 | 1127043 | breast cancer 2                          | Brca2 | 360254 | 1,98 | up   |
| 6707100 | 7099740 | 1127030 | breast cancer 2                          | Brca2 | 360254 | 1,07 | up   |
| 6730235 | 7099740 | 1127042 | breast cancer 2                          | Brca2 | 360254 | 1,01 | up   |
| 5676698 | 7331844 | 1700212 | bridging integrator 2                    | Bin2  | 366988 | 1,05 | up   |
| 5718784 | 7331844 | 1700216 | bridging integrator 2                    | Bin2  | 366988 | 1,02 | down |
| 5876324 | 7331844 | 1700211 | bridging integrator 2                    | Bin2  | 366988 | 1,28 | up   |
| 5912289 | 7331844 | 1700208 | bridging integrator 2                    | Bin2  | 366988 | 1,23 | up   |
| 5975021 | 7331844 | 1700209 | bridging integrator 2                    | Bin2  | 366988 | 1,07 | down |
| 6000838 | 7331844 | 1700209 | bridging integrator 2                    | Bin2  | 366988 | 1,19 | up   |
| 6090506 | 7331844 | 1700215 | bridging integrator 2                    | Bin2  | 366988 | 1,13 | down |
| 6135897 | 7331844 | 1700209 | bridging integrator 2                    | Bin2  | 366988 | 1,02 | down |
| 6170746 | 7331844 | 1700208 | bridging integrator 2                    | Bin2  | 366988 | 1,12 | up   |
| 6207035 | 7331844 | 1700208 | bridging integrator 2                    | Bin2  | 366988 | 1,02 | down |
| 6251865 | 7331844 | 1700210 | bridging integrator 2                    | Bin2  | 366988 | 1,14 | down |
| 6296338 | 7331844 | 1700209 | bridging integrator 2                    | Bin2  | 366988 | 1,10 | up   |
| 6396114 | 7331844 | 1700218 | bridging integrator 2                    | Bin2  | 366988 | 1,15 | down |
| 6487543 | 7331844 | 1700214 | bridging integrator 2                    | Bin2  | 366988 | 1,01 | down |
| 6550124 | 7331844 | 1700217 | bridging integrator 2                    | Bin2  | 366988 | 1,03 | up   |
| 6557978 | 7331844 | 1700208 | bridging integrator 2                    | Bin2  | 366988 | 2,01 | down |
| 6651164 | 7331844 | 1700213 | bridging integrator 2                    | Bin2  | 366988 | 1,15 | up   |
| 5648007 | 7257361 | 1516088 | bromodomain and PHD finger containing, 1 | Brpf1 | 679713 | 1,20 | up   |
| 5658110 | 7257361 | 1516095 | bromodomain and PHD finger containing, 1 | Brpf1 | 679713 | 1,18 | down |
| 5672771 | 7257361 | 1516091 | bromodomain and PHD finger containing, 1 | Brpf1 | 679713 | 1,24 | down |

|         |         |         |                                                |         |        |      |      |
|---------|---------|---------|------------------------------------------------|---------|--------|------|------|
| 5724841 | 7257361 | 1516100 | bromodomain and PHD finger containing, 1       | Brpf1   | 679713 | 1,28 | down |
| 5773810 | 7257361 | 1516088 | bromodomain and PHD finger containing, 1       | Brpf1   | 679713 | 1,27 | up   |
| 5827341 | 7257361 | 1516097 | bromodomain and PHD finger containing, 1       | Brpf1   | 679713 | 2,05 | down |
| 5860867 | 7257361 | 1516086 | bromodomain and PHD finger containing, 1       | Brpf1   | 679713 | 1,19 | up   |
| 5865725 | 7257361 | 1516098 | bromodomain and PHD finger containing, 1       | Brpf1   | 679713 | 1,23 | down |
| 5868252 | 7257361 | 1516096 | bromodomain and PHD finger containing, 1       | Brpf1   | 679713 | 1,02 | down |
| 5880242 | 7257361 | 1516086 | bromodomain and PHD finger containing, 1       | Brpf1   | 679713 | 1,10 | down |
| 5898051 | 7257361 | 1516095 | bromodomain and PHD finger containing, 1       | Brpf1   | 679713 | 1,12 | up   |
| 5917979 | 7257361 | 1516098 | bromodomain and PHD finger containing, 1       | Brpf1   | 679713 | 1,08 | down |
| 5980912 | 7257361 | 1516099 | bromodomain and PHD finger containing, 1       | Brpf1   | 679713 | 1,02 | up   |
| 6040680 | 7257361 | 1516090 | bromodomain and PHD finger containing, 1       | Brpf1   | 679713 | 1,06 | up   |
| 6121375 | 7257361 | 1516093 | bromodomain and PHD finger containing, 1       | Brpf1   | 679713 | 1,60 | down |
| 6123698 | 7257361 | 1516100 | bromodomain and PHD finger containing, 1       | Brpf1   | 679713 | 1,28 | down |
| 6148461 | 7257361 | 1516088 | bromodomain and PHD finger containing, 1       | Brpf1   | 679713 | 1,20 | down |
| 6165003 | 7257361 | 1516089 | bromodomain and PHD finger containing, 1       | Brpf1   | 679713 | 1,14 | up   |
| 6225334 | 7257361 | 1516092 | bromodomain and PHD finger containing, 1       | Brpf1   | 679713 | 1,00 | down |
| 6335954 | 7257361 | 1516085 | bromodomain and PHD finger containing, 1       | Brpf1   | 679713 | 1,05 | down |
| 6348445 | 7257361 | 1516097 | bromodomain and PHD finger containing, 1       | Brpf1   | 679713 | 1,14 | down |
| 6449477 | 7257361 | 1516097 | bromodomain and PHD finger containing, 1       | Brpf1   | 679713 | 1,47 | up   |
| 6501448 | 7257361 | 1516094 | bromodomain and PHD finger containing, 1       | Brpf1   | 679713 | 1,15 | up   |
| 6546664 | 7257361 | 1516087 | bromodomain and PHD finger containing, 1       | Brpf1   | 679713 | 1,06 | up   |
| 6584166 | 7257361 | 1516101 | bromodomain and PHD finger containing, 1       | Brpf1   | 679713 | 1,35 | up   |
| 6606101 | 7257361 | 1516098 | bromodomain and PHD finger containing, 1       | Brpf1   | 679713 | 1,08 | down |
| 6742223 | 7257361 | 1516090 | bromodomain and PHD finger containing, 1       | Brpf1   | 679713 | 1,17 | down |
| 5659061 | 7173863 | 1309675 | bruno-like 4, RNA binding protein (Drosophila) | Brunol4 | 307540 | 1,82 | up   |
| 5665401 | 7173863 | 1309737 | bruno-like 4, RNA binding protein (Drosophila) | Brunol4 | 307540 | 1,06 | up   |
| 5675666 | 7173863 | 1309712 | bruno-like 4, RNA binding protein (Drosophila) | Brunol4 | 307540 | 1,12 | up   |
| 5764751 | 7173863 | 1309657 | bruno-like 4, RNA binding protein (Drosophila) | Brunol4 | 307540 | 1,42 | up   |
| 5804912 | 7173863 | 1309671 | bruno-like 4, RNA binding protein (Drosophila) | Brunol4 | 307540 | 1,14 | up   |
| 5848768 | 7173863 | 1309664 | bruno-like 4, RNA binding protein (Drosophila) | Brunol4 | 307540 | 1,37 | up   |
| 6089116 | 7173863 | 1309667 | bruno-like 4, RNA binding protein (Drosophila) | Brunol4 | 307540 | 1,45 | down |
| 6092111 | 7173863 | 1309669 | bruno-like 4, RNA binding protein (Drosophila) | Brunol4 | 307540 | 1,19 | down |
| 6094745 | 7173863 | 1309657 | bruno-like 4, RNA binding protein (Drosophila) | Brunol4 | 307540 | 1,08 | up   |
| 6182482 | 7173863 | 1309677 | bruno-like 4, RNA binding protein (Drosophila) | Brunol4 | 307540 | 1,29 | down |
| 6187269 | 7173863 | 1309672 | bruno-like 4, RNA binding protein (Drosophila) | Brunol4 | 307540 | 1,16 | up   |
| 6223980 | 7173863 | 1309657 | bruno-like 4, RNA binding protein (Drosophila) | Brunol4 | 307540 | 1,31 | down |
| 6390131 | 7173863 | 1309737 | bruno-like 4, RNA binding protein (Drosophila) | Brunol4 | 307540 | 1,19 | up   |
| 6419025 | 7173863 | 1309667 | bruno-like 4, RNA binding protein (Drosophila) | Brunol4 | 307540 | 1,22 | down |
| 6658793 | 7173863 | 1309677 | bruno-like 4, RNA binding protein (Drosophila) | Brunol4 | 307540 | 1,28 | up   |
| 6668421 | 7173863 | 1309662 | bruno-like 4, RNA binding protein (Drosophila) | Brunol4 | 307540 | 1,60 | up   |
| 6694051 | 7173863 | 1309661 | bruno-like 4, RNA binding protein (Drosophila) | Brunol4 | 307540 | 1,03 | down |
| 6704068 | 7173863 | 1309674 | bruno-like 4, RNA binding protein (Drosophila) | Brunol4 | 307540 | 1,32 | up   |
| 5756488 | 7312250 | 1652654 | bruno-like 5, RNA binding protein (Drosophila) | Brunol5 | 314647 | 1,31 | down |
| 5898600 | 7312250 | 1652647 | bruno-like 5, RNA binding protein (Drosophila) | Brunol5 | 314647 | 1,05 | up   |
| 5920059 | 7312250 | 1652654 | bruno-like 5, RNA binding protein (Drosophila) | Brunol5 | 314647 | 1,19 | down |
| 5953566 | 7312250 | 1652652 | bruno-like 5, RNA binding protein (Drosophila) | Brunol5 | 314647 | 1,27 | down |
| 5960988 | 7312250 | 1652653 | bruno-like 5, RNA binding protein (Drosophila) | Brunol5 | 314647 | 1,03 | up   |
| 5974749 | 7312250 | 1652643 | bruno-like 5, RNA binding protein (Drosophila) | Brunol5 | 314647 | 1,36 | down |
| 6030109 | 7312250 | 1652651 | bruno-like 5, RNA binding protein (Drosophila) | Brunol5 | 314647 | 1,60 | up   |
| 6054101 | 7312250 | 1652651 | bruno-like 5, RNA binding protein (Drosophila) | Brunol5 | 314647 | 1,18 | down |
| 6159141 | 7312250 | 1652655 | bruno-like 5, RNA binding protein (Drosophila) | Brunol5 | 314647 | 1,16 | down |
| 6202020 | 7312250 | 1652644 | bruno-like 5, RNA binding protein (Drosophila) | Brunol5 | 314647 | 1,03 | down |
| 6292017 | 7312250 | 1652645 | bruno-like 5, RNA binding protein (Drosophila) | Brunol5 | 314647 | 1,62 | up   |
| 6293111 | 7312250 | 1652649 | bruno-like 5, RNA binding protein (Drosophila) | Brunol5 | 314647 | 4,21 | down |
| 6341287 | 7312250 | 1652650 | bruno-like 5, RNA binding protein (Drosophila) | Brunol5 | 314647 | 1,23 | up   |
| 6397179 | 7312250 | 1652640 | bruno-like 5, RNA binding protein (Drosophila) | Brunol5 | 314647 | 1,15 | up   |

|         |         |         |                                                                     |           |        |      |      |
|---------|---------|---------|---------------------------------------------------------------------|-----------|--------|------|------|
| 6490835 | 7312250 | 1652648 | bruno-like 5, RNA binding protein (Drosophila)                      | Brunol5   | 314647 | 1,20 | up   |
| 6624171 | 7312250 | 1652641 | bruno-like 5, RNA binding protein (Drosophila)                      | Brunol5   | 314647 | 1,27 | down |
| 6657968 | 7312250 | 1652646 | bruno-like 5, RNA binding protein (Drosophila)                      | Brunol5   | 314647 | 1,44 | up   |
| 5635202 | 7336835 | 1711585 | bruno-like 6, RNA binding protein (Drosophila)                      | Brunol6   | 300758 | 1,06 | up   |
| 5667269 | 7336835 | 1711598 | bruno-like 6, RNA binding protein (Drosophila)                      | Brunol6   | 300758 | 1,76 | up   |
| 5765677 | 7336835 | 1711604 | bruno-like 6, RNA binding protein (Drosophila)                      | Brunol6   | 300758 | 1,13 | up   |
| 5801088 | 7336835 | 1711594 | bruno-like 6, RNA binding protein (Drosophila)                      | Brunol6   | 300758 | 1,14 | down |
| 5812309 | 7336835 | 1711597 | bruno-like 6, RNA binding protein (Drosophila)                      | Brunol6   | 300758 | 1,05 | up   |
| 5860271 | 7336835 | 1711598 | bruno-like 6, RNA binding protein (Drosophila)                      | Brunol6   | 300758 | 1,36 | down |
| 5871756 | 7336835 | 1711601 | bruno-like 6, RNA binding protein (Drosophila)                      | Brunol6   | 300758 | 1,09 | up   |
| 5908448 | 7336835 | 1711591 | bruno-like 6, RNA binding protein (Drosophila)                      | Brunol6   | 300758 | 1,10 | down |
| 6064120 | 7336835 | 1711604 | bruno-like 6, RNA binding protein (Drosophila)                      | Brunol6   | 300758 | 1,21 | up   |
| 6077088 | 7336835 | 1711600 | bruno-like 6, RNA binding protein (Drosophila)                      | Brunol6   | 300758 | 1,10 | up   |
| 6276869 | 7336835 | 1711602 | bruno-like 6, RNA binding protein (Drosophila)                      | Brunol6   | 300758 | 1,04 | down |
| 6347966 | 7336835 | 1711603 | bruno-like 6, RNA binding protein (Drosophila)                      | Brunol6   | 300758 | 1,23 | up   |
| 6518939 | 7336835 | 1711602 | bruno-like 6, RNA binding protein (Drosophila)                      | Brunol6   | 300758 | 1,27 | up   |
| 6555716 | 7336835 | 1711596 | bruno-like 6, RNA binding protein (Drosophila)                      | Brunol6   | 300758 | 1,06 | up   |
| 6589871 | 7336835 | 1711587 | bruno-like 6, RNA binding protein (Drosophila)                      | Brunol6   | 300758 | 1,05 | up   |
| 6664636 | 7336835 | 1711595 | bruno-like 6, RNA binding protein (Drosophila)                      | Brunol6   | 300758 | 1,98 | down |
| 5688846 | 7323083 | 1678798 | BTB (POZ) domain containing 11                                      | Btbd11    | 314675 | 1,06 | up   |
| 5872782 | 7323083 | 1678792 | BTB (POZ) domain containing 11                                      | Btbd11    | 314675 | 1,04 | up   |
| 5949912 | 7323083 | 1678826 | BTB (POZ) domain containing 11                                      | Btbd11    | 314675 | 1,16 | down |
| 5962236 | 7323083 | 1678792 | BTB (POZ) domain containing 11                                      | Btbd11    | 314675 | 1,27 | down |
| 6115190 | 7323083 | 1678802 | BTB (POZ) domain containing 11                                      | Btbd11    | 314675 | 1,23 | up   |
| 6129616 | 7323083 | 1678827 | BTB (POZ) domain containing 11                                      | Btbd11    | 314675 | 1,32 | up   |
| 6169777 | 7323083 | 1678792 | BTB (POZ) domain containing 11                                      | Btbd11    | 314675 | 1,80 | up   |
| 6322234 | 7323083 | 1678806 | BTB (POZ) domain containing 11                                      | Btbd11    | 314675 | 2,08 | down |
| 6337641 | 7323083 | 1678792 | BTB (POZ) domain containing 11                                      | Btbd11    | 314675 | 1,23 | up   |
| 6384666 | 7323083 | 1678794 | BTB (POZ) domain containing 11                                      | Btbd11    | 314675 | 1,27 | down |
| 6390284 | 7323083 | 1678795 | BTB (POZ) domain containing 11                                      | Btbd11    | 314675 | 1,25 | down |
| 6409830 | 7323083 | 1678793 | BTB (POZ) domain containing 11                                      | Btbd11    | 314675 | 1,12 | up   |
| 6425863 | 7323083 | 1678801 | BTB (POZ) domain containing 11                                      | Btbd11    | 314675 | 1,19 | up   |
| 6429128 | 7323083 | 1678792 | BTB (POZ) domain containing 11                                      | Btbd11    | 314675 | 1,22 | down |
| 6480285 | 7323083 | 1678816 | BTB (POZ) domain containing 11                                      | Btbd11    | 314675 | 1,06 | down |
| 6548796 | 7323083 | 1678808 | BTB (POZ) domain containing 11                                      | Btbd11    | 314675 | 1,82 | down |
| 6626701 | 7323083 | 1678804 | BTB (POZ) domain containing 11                                      | Btbd11    | 314675 | 1,05 | down |
| 6630832 | 7323083 | 1678797 | BTB (POZ) domain containing 11                                      | Btbd11    | 314675 | 1,70 | down |
| 6668055 | 7323083 | 1678805 | BTB (POZ) domain containing 11                                      | Btbd11    | 314675 | 1,02 | down |
| 6732206 | 7323083 | 1678809 | BTB (POZ) domain containing 11                                      | Btbd11    | 314675 | 1,09 | down |
| 6739702 | 7323083 | 1678796 | BTB (POZ) domain containing 11                                      | Btbd11    | 314675 | 1,08 | up   |
| 6001158 | 7065265 | 1044575 | BTB (POZ) domain containing 12                                      | Btbd12    | 302953 | 1,03 | down |
| 5648037 | 7086522 | 1093940 | BTB and CNC homology 1, basic leucine zipper transcription factor 1 | Bach1     | 304127 | 1,66 | up   |
| 5673865 | 7086522 | 1093950 | BTB and CNC homology 1, basic leucine zipper transcription factor 1 | Bach1     | 304127 | 1,49 | up   |
| 5720052 | 7086522 | 1093950 | BTB and CNC homology 1, basic leucine zipper transcription factor 1 | Bach1     | 304127 | 1,01 | up   |
| 5828620 | 7086522 | 1093934 | BTB and CNC homology 1, basic leucine zipper transcription factor 1 | Bach1     | 304127 | 1,84 | down |
| 6085597 | 7086522 | 1093950 | BTB and CNC homology 1, basic leucine zipper transcription factor 1 | Bach1     | 304127 | 1,63 | up   |
| 6087978 | 7086522 | 1093942 | BTB and CNC homology 1, basic leucine zipper transcription factor 1 | Bach1     | 304127 | 1,36 | up   |
| 6103678 | 7086522 | 1093933 | BTB and CNC homology 1, basic leucine zipper transcription factor 1 | Bach1     | 304127 | 1,05 | down |
| 6374432 | 7086522 | 1093940 | BTB and CNC homology 1, basic leucine zipper transcription factor 1 | Bach1     | 304127 | 1,34 | up   |
| 6677173 | 7086522 | 1093943 | BTB and CNC homology 1, basic leucine zipper transcription factor 1 | Bach1     | 304127 | 1,52 | up   |
| 5791956 | 7372840 | 1803754 | C1GALT1-specific chaperone 1                                        | C1galt1c1 | 302499 | 1,64 | up   |
| 6077644 | 7372840 | 1803757 | C1GALT1-specific chaperone 1                                        | C1galt1c1 | 302499 | 1,18 | down |
| 6187408 | 7372840 | 1803755 | C1GALT1-specific chaperone 1                                        | C1galt1c1 | 302499 | 1,20 | up   |
| 6703400 | 7372840 | 1803758 | C1GALT1-specific chaperone 1                                        | C1galt1c1 | 302499 | 1,30 | down |
| 5763355 | 7181510 | 1329133 | cadherin 13                                                         | Cdh13     | 192248 | 1,08 | down |
| 5780267 | 7181510 | 1329125 | cadherin 13                                                         | Cdh13     | 192248 | 1,21 | down |

|         |         |         |                                                                               |        |        |      |      |
|---------|---------|---------|-------------------------------------------------------------------------------|--------|--------|------|------|
| 5925613 | 7181510 | 1329122 | cadherin 13                                                                   | Cdh13  | 192248 | 1,05 | up   |
| 6009746 | 7181510 | 1329126 | cadherin 13                                                                   | Cdh13  | 192248 | 1,41 | up   |
| 6022156 | 7181510 | 1329127 | cadherin 13                                                                   | Cdh13  | 192248 | 2,36 | up   |
| 6278957 | 7181510 | 1329121 | cadherin 13                                                                   | Cdh13  | 192248 | 1,00 | up   |
| 6327289 | 7181510 | 1329123 | cadherin 13                                                                   | Cdh13  | 192248 | 1,22 | down |
| 6485549 | 7181510 | 1329130 | cadherin 13                                                                   | Cdh13  | 192248 | 1,76 | down |
| 6502840 | 7181510 | 1329129 | cadherin 13                                                                   | Cdh13  | 192248 | 1,11 | down |
| 6581008 | 7181510 | 1329132 | cadherin 13                                                                   | Cdh13  | 192248 | 1,01 | down |
| 6609680 | 7181510 | 1329133 | cadherin 13                                                                   | Cdh13  | 192248 | 1,01 | down |
| 6643153 | 7181510 | 1329124 | cadherin 13                                                                   | Cdh13  | 192248 | 1,21 | up   |
| 6655217 | 7181510 | 1329131 | cadherin 13                                                                   | Cdh13  | 192248 | 1,04 | down |
| 6680082 | 7181510 | 1329128 | cadherin 13                                                                   | Cdh13  | 192248 | 1,02 | down |
| 6732189 | 7181510 | 1329134 | cadherin 13                                                                   | Cdh13  | 192248 | 1,26 | up   |
| 5683177 | 7247856 | 1492115 | cadherin 22                                                                   | Cdh22  | 29182  | 1,06 | up   |
| 5697495 | 7247856 | 1492120 | cadherin 22                                                                   | Cdh22  | 29182  | 1,35 | up   |
| 5731276 | 7247856 | 1492111 | cadherin 22                                                                   | Cdh22  | 29182  | 1,25 | down |
| 5745023 | 7247856 | 1492114 | cadherin 22                                                                   | Cdh22  | 29182  | 1,03 | up   |
| 5987810 | 7247856 | 1492118 | cadherin 22                                                                   | Cdh22  | 29182  | 1,42 | up   |
| 6017674 | 7247856 | 1492112 | cadherin 22                                                                   | Cdh22  | 29182  | 1,41 | up   |
| 6071805 | 7247856 | 1492110 | cadherin 22                                                                   | Cdh22  | 29182  | 1,40 | down |
| 6090208 | 7247856 | 1492113 | cadherin 22                                                                   | Cdh22  | 29182  | 1,05 | down |
| 6109011 | 7247856 | 1492117 | cadherin 22                                                                   | Cdh22  | 29182  | 1,19 | up   |
| 6245482 | 7247856 | 1492109 | cadherin 22                                                                   | Cdh22  | 29182  | 2,02 | down |
| 6320215 | 7247856 | 1492111 | cadherin 22                                                                   | Cdh22  | 29182  | 1,28 | up   |
| 6474507 | 7247856 | 1492119 | cadherin 22                                                                   | Cdh22  | 29182  | 1,32 | up   |
| 6520564 | 7247856 | 1492119 | cadherin 22                                                                   | Cdh22  | 29182  | 1,05 | down |
| 6628394 | 7247856 | 1492116 | cadherin 22                                                                   | Cdh22  | 29182  | 1,09 | up   |
| 6631773 | 7247856 | 1492120 | cadherin 22                                                                   | Cdh22  | 29182  | 1,44 | down |
| 6016426 | 7180732 | 1326737 | cadherin 3, type 1, P-cadherin (placental)                                    | Cdh3   | 116777 | 1,10 | up   |
| 6407055 | 7180732 | 1326736 | cadherin 3, type 1, P-cadherin (placental)                                    | Cdh3   | 116777 | 1,22 | up   |
| 5711643 | 7178411 | 1321047 | cadherin 8                                                                    | Cdh8   | 84408  | 1,06 | up   |
| 5725240 | 7178411 | 1321041 | cadherin 8                                                                    | Cdh8   | 84408  | 1,45 | down |
| 5911342 | 7178411 | 1321042 | cadherin 8                                                                    | Cdh8   | 84408  | 1,19 | up   |
| 5912954 | 7178411 | 1321053 | cadherin 8                                                                    | Cdh8   | 84408  | 1,05 | up   |
| 6002926 | 7178411 | 1321051 | cadherin 8                                                                    | Cdh8   | 84408  | 1,29 | up   |
| 6103662 | 7178411 | 1321045 | cadherin 8                                                                    | Cdh8   | 84408  | 1,15 | up   |
| 6106227 | 7178411 | 1321044 | cadherin 8                                                                    | Cdh8   | 84408  | 1,09 | down |
| 6151661 | 7178411 | 1321042 | cadherin 8                                                                    | Cdh8   | 84408  | 2,04 | down |
| 6224240 | 7178411 | 1321049 | cadherin 8                                                                    | Cdh8   | 84408  | 1,94 | up   |
| 6275178 | 7178411 | 1321048 | cadherin 8                                                                    | Cdh8   | 84408  | 1,05 | down |
| 6407050 | 7178411 | 1321042 | cadherin 8                                                                    | Cdh8   | 84408  | 1,15 | down |
| 6511339 | 7178411 | 1321043 | cadherin 8                                                                    | Cdh8   | 84408  | 1,12 | up   |
| 6614198 | 7178411 | 1321046 | cadherin 8                                                                    | Cdh8   | 84408  | 1,09 | up   |
| 6617347 | 7178411 | 1321050 | cadherin 8                                                                    | Cdh8   | 84408  | 1,44 | down |
| 6667097 | 7178411 | 1321052 | cadherin 8                                                                    | Cdh8   | 84408  | 1,08 | up   |
| 6743041 | 7178411 | 1321052 | cadherin 8                                                                    | Cdh8   | 84408  | 1,19 | up   |
| 5651932 | 7212718 | 1404944 | cadherin, EGF LAG seven-pass G-type receptor 2 (flamingo homolog, Drosophila) | Celsr2 | 83465  | 2,05 | down |
| 5655635 | 7212718 | 1404961 | cadherin, EGF LAG seven-pass G-type receptor 2 (flamingo homolog, Drosophila) | Celsr2 | 83465  | 1,03 | down |
| 5667437 | 7212718 | 1404958 | cadherin, EGF LAG seven-pass G-type receptor 2 (flamingo homolog, Drosophila) | Celsr2 | 83465  | 1,12 | down |
| 5675858 | 7212718 | 1404938 | cadherin, EGF LAG seven-pass G-type receptor 2 (flamingo homolog, Drosophila) | Celsr2 | 83465  | 1,92 | down |
| 5732789 | 7212718 | 1404946 | cadherin, EGF LAG seven-pass G-type receptor 2 (flamingo homolog, Drosophila) | Celsr2 | 83465  | 1,42 | down |
| 5769502 | 7212718 | 1404963 | cadherin, EGF LAG seven-pass G-type receptor 2 (flamingo homolog, Drosophila) | Celsr2 | 83465  | 1,63 | up   |
| 5780132 | 7212718 | 1404952 | cadherin, EGF LAG seven-pass G-type receptor 2 (flamingo homolog, Drosophila) | Celsr2 | 83465  | 1,55 | up   |
| 5822282 | 7212718 | 1404953 | cadherin, EGF LAG seven-pass G-type receptor 2 (flamingo homolog, Drosophila) | Celsr2 | 83465  | 1,35 | down |
| 5846134 | 7212718 | 1404960 | cadherin, EGF LAG seven-pass G-type receptor 2 (flamingo homolog, Drosophila) | Celsr2 | 83465  | 1,58 | down |
| 5887592 | 7212718 | 1404940 | cadherin, EGF LAG seven-pass G-type receptor 2 (flamingo homolog, Drosophila) | Celsr2 | 83465  | 1,22 | up   |

|         |         |         |                                                                               |          |        |      |      |
|---------|---------|---------|-------------------------------------------------------------------------------|----------|--------|------|------|
| 5932325 | 7212718 | 1404945 | cadherin, EGF LAG seven-pass G-type receptor 2 (flamingo homolog, Drosophila) | Celsr2   | 83465  | 1,03 | down |
| 5933205 | 7212718 | 1404944 | cadherin, EGF LAG seven-pass G-type receptor 2 (flamingo homolog, Drosophila) | Celsr2   | 83465  | 1,16 | down |
| 5942845 | 7212718 | 1404939 | cadherin, EGF LAG seven-pass G-type receptor 2 (flamingo homolog, Drosophila) | Celsr2   | 83465  | 1,02 | up   |
| 5989678 | 7212718 | 1404962 | cadherin, EGF LAG seven-pass G-type receptor 2 (flamingo homolog, Drosophila) | Celsr2   | 83465  | 1,24 | up   |
| 6005958 | 7212718 | 1404950 | cadherin, EGF LAG seven-pass G-type receptor 2 (flamingo homolog, Drosophila) | Celsr2   | 83465  | 1,23 | up   |
| 6046069 | 7212718 | 1404957 | cadherin, EGF LAG seven-pass G-type receptor 2 (flamingo homolog, Drosophila) | Celsr2   | 83465  | 1,19 | down |
| 6086903 | 7212718 | 1404943 | cadherin, EGF LAG seven-pass G-type receptor 2 (flamingo homolog, Drosophila) | Celsr2   | 83465  | 1,24 | down |
| 6112143 | 7212718 | 1404940 | cadherin, EGF LAG seven-pass G-type receptor 2 (flamingo homolog, Drosophila) | Celsr2   | 83465  | 1,36 | down |
| 6136164 | 7212718 | 1404959 | cadherin, EGF LAG seven-pass G-type receptor 2 (flamingo homolog, Drosophila) | Celsr2   | 83465  | 1,03 | up   |
| 6153084 | 7212718 | 1404948 | cadherin, EGF LAG seven-pass G-type receptor 2 (flamingo homolog, Drosophila) | Celsr2   | 83465  | 1,14 | up   |
| 6154054 | 7212718 | 1404964 | cadherin, EGF LAG seven-pass G-type receptor 2 (flamingo homolog, Drosophila) | Celsr2   | 83465  | 1,07 | up   |
| 6177121 | 7212718 | 1404937 | cadherin, EGF LAG seven-pass G-type receptor 2 (flamingo homolog, Drosophila) | Celsr2   | 83465  | 2,07 | down |
| 6214493 | 7212718 | 1404955 | cadherin, EGF LAG seven-pass G-type receptor 2 (flamingo homolog, Drosophila) | Celsr2   | 83465  | 1,05 | down |
| 6245419 | 7212718 | 1404944 | cadherin, EGF LAG seven-pass G-type receptor 2 (flamingo homolog, Drosophila) | Celsr2   | 83465  | 1,48 | down |
| 6305177 | 7212718 | 1404947 | cadherin, EGF LAG seven-pass G-type receptor 2 (flamingo homolog, Drosophila) | Celsr2   | 83465  | 1,25 | down |
| 6351155 | 7212718 | 1404942 | cadherin, EGF LAG seven-pass G-type receptor 2 (flamingo homolog, Drosophila) | Celsr2   | 83465  | 1,03 | up   |
| 6367502 | 7212718 | 1404941 | cadherin, EGF LAG seven-pass G-type receptor 2 (flamingo homolog, Drosophila) | Celsr2   | 83465  | 1,02 | up   |
| 6428183 | 7212718 | 1404966 | cadherin, EGF LAG seven-pass G-type receptor 2 (flamingo homolog, Drosophila) | Celsr2   | 83465  | 1,19 | up   |
| 6430644 | 7212718 | 1404942 | cadherin, EGF LAG seven-pass G-type receptor 2 (flamingo homolog, Drosophila) | Celsr2   | 83465  | 1,04 | up   |
| 6481446 | 7212718 | 1404941 | cadherin, EGF LAG seven-pass G-type receptor 2 (flamingo homolog, Drosophila) | Celsr2   | 83465  | 1,28 | down |
| 6505764 | 7212718 | 1404937 | cadherin, EGF LAG seven-pass G-type receptor 2 (flamingo homolog, Drosophila) | Celsr2   | 83465  | 1,45 | up   |
| 6522079 | 7212718 | 1404956 | cadherin, EGF LAG seven-pass G-type receptor 2 (flamingo homolog, Drosophila) | Celsr2   | 83465  | 1,13 | up   |
| 6539810 | 7212718 | 1404954 | cadherin, EGF LAG seven-pass G-type receptor 2 (flamingo homolog, Drosophila) | Celsr2   | 83465  | 1,18 | down |
| 6621181 | 7212718 | 1404938 | cadherin, EGF LAG seven-pass G-type receptor 2 (flamingo homolog, Drosophila) | Celsr2   | 83465  | 1,33 | up   |
| 6636445 | 7212718 | 1404951 | cadherin, EGF LAG seven-pass G-type receptor 2 (flamingo homolog, Drosophila) | Celsr2   | 83465  | 1,03 | up   |
| 6686984 | 7212718 | 1404949 | cadherin, EGF LAG seven-pass G-type receptor 2 (flamingo homolog, Drosophila) | Celsr2   | 83465  | 1,82 | up   |
| 5715161 | 7138047 | 1221235 | cadherin-like 24                                                              | Cdh24    | 498515 | 1,03 | up   |
| 5866371 | 7138047 | 1221244 | cadherin-like 24                                                              | Cdh24    | 498515 | 1,16 | down |
| 5866592 | 7138047 | 1221242 | cadherin-like 24                                                              | Cdh24    | 498515 | 1,76 | down |
| 6004507 | 7138047 | 1221246 | cadherin-like 24                                                              | Cdh24    | 498515 | 1,03 | up   |
| 6024922 | 7138047 | 1221238 | cadherin-like 24                                                              | Cdh24    | 498515 | 1,15 | up   |
| 6041092 | 7138047 | 1221234 | cadherin-like 24                                                              | Cdh24    | 498515 | 1,31 | down |
| 6090191 | 7138047 | 1221244 | cadherin-like 24                                                              | Cdh24    | 498515 | 2,68 | up   |
| 6205143 | 7138047 | 1221238 | cadherin-like 24                                                              | Cdh24    | 498515 | 1,35 | up   |
| 6334966 | 7138047 | 1221239 | cadherin-like 24                                                              | Cdh24    | 498515 | 1,15 | up   |
| 6409682 | 7138047 | 1221244 | cadherin-like 24                                                              | Cdh24    | 498515 | 1,32 | down |
| 6450181 | 7138047 | 1221243 | cadherin-like 24                                                              | Cdh24    | 498515 | 1,04 | up   |
| 6454174 | 7138047 | 1221233 | cadherin-like 24                                                              | Cdh24    | 498515 | 1,07 | up   |
| 6607237 | 7138047 | 1221241 | cadherin-like 24                                                              | Cdh24    | 498515 | 1,00 | down |
| 6667532 | 7138047 | 1221236 | cadherin-like 24                                                              | Cdh24    | 498515 | 1,04 | up   |
| 6700367 | 7138047 | 1221240 | cadherin-like 24                                                              | Cdh24    | 498515 | 1,07 | up   |
| 6062707 | 7056254 | 1023335 | calcitonin/calcitonin-related polypeptide, alpha                              | Calca    | 24241  | 1,92 | up   |
| 6080546 | 7056254 | 1023333 | calcitonin/calcitonin-related polypeptide, alpha                              | Calca    | 24241  | 1,13 | down |
| 6188235 | 7056254 | 1023336 | calcitonin/calcitonin-related polypeptide, alpha                              | Calca    | 24241  | 1,57 | down |
| 6360216 | 7056254 | 1023337 | calcitonin/calcitonin-related polypeptide, alpha                              | Calca    | 24241  | 1,04 | down |
| 6384359 | 7056254 | 1023334 | calcitonin/calcitonin-related polypeptide, alpha                              | Calca    | 24241  | 3,31 | up   |
| 6590191 | 7056254 | 1023332 | calcitonin/calcitonin-related polypeptide, alpha                              | Calca    | 24241  | 1,15 | up   |
| 6415619 | 7038969 | 982981  | calcium binding protein 2                                                     | Cabp2    | 499298 | 1,04 | up   |
| 5648191 | 7148574 | 1247418 | calcium channel, voltage-dependent, alpha2/delta subunit 3                    | Cacna2d3 | 306243 | 1,15 | up   |
| 5651285 | 7148574 | 1247446 | calcium channel, voltage-dependent, alpha2/delta subunit 3                    | Cacna2d3 | 306243 | 1,00 | up   |
| 5683966 | 7148574 | 1247421 | calcium channel, voltage-dependent, alpha2/delta subunit 3                    | Cacna2d3 | 306243 | 1,21 | up   |
| 5691639 | 7148574 | 1247416 | calcium channel, voltage-dependent, alpha2/delta subunit 3                    | Cacna2d3 | 306243 | 1,37 | up   |
| 5706697 | 7148574 | 1247423 | calcium channel, voltage-dependent, alpha2/delta subunit 3                    | Cacna2d3 | 306243 | 1,07 | up   |
| 5734667 | 7148574 | 1247436 | calcium channel, voltage-dependent, alpha2/delta subunit 3                    | Cacna2d3 | 306243 | 1,42 | down |
| 5774312 | 7148574 | 1247444 | calcium channel, voltage-dependent, alpha2/delta subunit 3                    | Cacna2d3 | 306243 | 1,52 | up   |
| 5784374 | 7148574 | 1247427 | calcium channel, voltage-dependent, alpha2/delta subunit 3                    | Cacna2d3 | 306243 | 1,14 | up   |

|         |         |         |                                                              |          |        |      |      |
|---------|---------|---------|--------------------------------------------------------------|----------|--------|------|------|
| 5784465 | 7148574 | 1247420 | calcium channel, voltage-dependent, alpha2/delta subunit 3   | Cacna2d3 | 306243 | 1,03 | down |
| 5805191 | 7148574 | 1247448 | calcium channel, voltage-dependent, alpha2/delta subunit 3   | Cacna2d3 | 306243 | 1,30 | up   |
| 5822162 | 7148574 | 1247428 | calcium channel, voltage-dependent, alpha2/delta subunit 3   | Cacna2d3 | 306243 | 1,08 | down |
| 5823166 | 7148574 | 1247419 | calcium channel, voltage-dependent, alpha2/delta subunit 3   | Cacna2d3 | 306243 | 1,05 | down |
| 5835237 | 7148574 | 1247417 | calcium channel, voltage-dependent, alpha2/delta subunit 3   | Cacna2d3 | 306243 | 1,11 | down |
| 5876318 | 7148574 | 1247433 | calcium channel, voltage-dependent, alpha2/delta subunit 3   | Cacna2d3 | 306243 | 1,31 | down |
| 5894376 | 7148574 | 1247442 | calcium channel, voltage-dependent, alpha2/delta subunit 3   | Cacna2d3 | 306243 | 1,01 | up   |
| 5910174 | 7148574 | 1247437 | calcium channel, voltage-dependent, alpha2/delta subunit 3   | Cacna2d3 | 306243 | 1,19 | down |
| 5958293 | 7148574 | 1247429 | calcium channel, voltage-dependent, alpha2/delta subunit 3   | Cacna2d3 | 306243 | 1,01 | up   |
| 5959428 | 7148574 | 1247426 | calcium channel, voltage-dependent, alpha2/delta subunit 3   | Cacna2d3 | 306243 | 1,05 | up   |
| 5960682 | 7148574 | 1247441 | calcium channel, voltage-dependent, alpha2/delta subunit 3   | Cacna2d3 | 306243 | 1,24 | down |
| 6018780 | 7148574 | 1247425 | calcium channel, voltage-dependent, alpha2/delta subunit 3   | Cacna2d3 | 306243 | 1,01 | down |
| 6035815 | 7148574 | 1247414 | calcium channel, voltage-dependent, alpha2/delta subunit 3   | Cacna2d3 | 306243 | 2,23 | down |
| 6212478 | 7148574 | 1247443 | calcium channel, voltage-dependent, alpha2/delta subunit 3   | Cacna2d3 | 306243 | 1,26 | up   |
| 6231268 | 7148574 | 1247438 | calcium channel, voltage-dependent, alpha2/delta subunit 3   | Cacna2d3 | 306243 | 1,13 | down |
| 6247257 | 7148574 | 1247434 | calcium channel, voltage-dependent, alpha2/delta subunit 3   | Cacna2d3 | 306243 | 1,35 | down |
| 6260265 | 7148574 | 1247439 | calcium channel, voltage-dependent, alpha2/delta subunit 3   | Cacna2d3 | 306243 | 1,15 | down |
| 6261650 | 7148574 | 1247431 | calcium channel, voltage-dependent, alpha2/delta subunit 3   | Cacna2d3 | 306243 | 1,00 | up   |
| 6280816 | 7148574 | 1247424 | calcium channel, voltage-dependent, alpha2/delta subunit 3   | Cacna2d3 | 306243 | 1,19 | up   |
| 6282015 | 7148574 | 1247415 | calcium channel, voltage-dependent, alpha2/delta subunit 3   | Cacna2d3 | 306243 | 1,20 | up   |
| 6309353 | 7148574 | 1247435 | calcium channel, voltage-dependent, alpha2/delta subunit 3   | Cacna2d3 | 306243 | 1,02 | up   |
| 6309649 | 7148574 | 1247445 | calcium channel, voltage-dependent, alpha2/delta subunit 3   | Cacna2d3 | 306243 | 1,29 | up   |
| 6316773 | 7148574 | 1247440 | calcium channel, voltage-dependent, alpha2/delta subunit 3   | Cacna2d3 | 306243 | 1,78 | down |
| 6467479 | 7148574 | 1247432 | calcium channel, voltage-dependent, alpha2/delta subunit 3   | Cacna2d3 | 306243 | 1,03 | up   |
| 6546769 | 7148574 | 1247422 | calcium channel, voltage-dependent, alpha2/delta subunit 3   | Cacna2d3 | 306243 | 1,02 | up   |
| 6569407 | 7148574 | 1247413 | calcium channel, voltage-dependent, alpha2/delta subunit 3   | Cacna2d3 | 306243 | 1,22 | up   |
| 6599451 | 7148574 | 1247412 | calcium channel, voltage-dependent, alpha2/delta subunit 3   | Cacna2d3 | 306243 | 1,07 | up   |
| 6645587 | 7148574 | 1247430 | calcium channel, voltage-dependent, alpha2/delta subunit 3   | Cacna2d3 | 306243 | 1,35 | down |
| 6678661 | 7148574 | 1247422 | calcium channel, voltage-dependent, alpha2/delta subunit 3   | Cacna2d3 | 306243 | 1,28 | up   |
| 6695856 | 7148574 | 1247447 | calcium channel, voltage-dependent, alpha2/delta subunit 3   | Cacna2d3 | 306243 | 1,59 | down |
| 5858966 | 7047552 | 1004716 | calcium channel, voltage-dependent, gamma subunit 8          | Cacng8   | 140729 | 1,18 | up   |
| 5898178 | 7047552 | 1004715 | calcium channel, voltage-dependent, gamma subunit 8          | Cacng8   | 140729 | 2,34 | up   |
| 5970097 | 7047552 | 1004715 | calcium channel, voltage-dependent, gamma subunit 8          | Cacng8   | 140729 | 1,21 | up   |
| 6161797 | 7047552 | 1004715 | calcium channel, voltage-dependent, gamma subunit 8          | Cacng8   | 140729 | 1,24 | down |
| 6303251 | 7047552 | 1004718 | calcium channel, voltage-dependent, gamma subunit 8          | Cacng8   | 140729 | 1,08 | down |
| 6343830 | 7047552 | 1004717 | calcium channel, voltage-dependent, gamma subunit 8          | Cacng8   | 140729 | 1,37 | down |
| 5728144 | 7380003 | 1820742 | calcium channel, voltage-dependent, L type, alpha 1F subunit | Cacna1f  | 114493 | 1,01 | down |
| 5777320 | 7380003 | 1820758 | calcium channel, voltage-dependent, L type, alpha 1F subunit | Cacna1f  | 114493 | 1,26 | down |
| 5789499 | 7380003 | 1820776 | calcium channel, voltage-dependent, L type, alpha 1F subunit | Cacna1f  | 114493 | 1,20 | up   |
| 5813291 | 7380003 | 1820769 | calcium channel, voltage-dependent, L type, alpha 1F subunit | Cacna1f  | 114493 | 1,15 | up   |
| 5827297 | 7380003 | 1820737 | calcium channel, voltage-dependent, L type, alpha 1F subunit | Cacna1f  | 114493 | 1,01 | up   |
| 5841677 | 7380003 | 1820747 | calcium channel, voltage-dependent, L type, alpha 1F subunit | Cacna1f  | 114493 | 1,57 | up   |
| 5842245 | 7380003 | 1820752 | calcium channel, voltage-dependent, L type, alpha 1F subunit | Cacna1f  | 114493 | 1,45 | down |
| 5893141 | 7380003 | 1820756 | calcium channel, voltage-dependent, L type, alpha 1F subunit | Cacna1f  | 114493 | 1,10 | down |
| 5931832 | 7380003 | 1820739 | calcium channel, voltage-dependent, L type, alpha 1F subunit | Cacna1f  | 114493 | 1,78 | down |
| 5944788 | 7380003 | 1820774 | calcium channel, voltage-dependent, L type, alpha 1F subunit | Cacna1f  | 114493 | 1,02 | up   |
| 5950331 | 7380003 | 1820738 | calcium channel, voltage-dependent, L type, alpha 1F subunit | Cacna1f  | 114493 | 1,12 | up   |
| 5960961 | 7380003 | 1820778 | calcium channel, voltage-dependent, L type, alpha 1F subunit | Cacna1f  | 114493 | 1,01 | up   |
| 5987441 | 7380003 | 1820746 | calcium channel, voltage-dependent, L type, alpha 1F subunit | Cacna1f  | 114493 | 1,35 | down |
| 5996961 | 7380003 | 1820771 | calcium channel, voltage-dependent, L type, alpha 1F subunit | Cacna1f  | 114493 | 1,01 | up   |
| 6022359 | 7380003 | 1820781 | calcium channel, voltage-dependent, L type, alpha 1F subunit | Cacna1f  | 114493 | 1,07 | up   |
| 6024745 | 7380003 | 1820745 | calcium channel, voltage-dependent, L type, alpha 1F subunit | Cacna1f  | 114493 | 1,36 | up   |
| 6041594 | 7380003 | 1820777 | calcium channel, voltage-dependent, L type, alpha 1F subunit | Cacna1f  | 114493 | 1,31 | down |
| 6055327 | 7380003 | 1820755 | calcium channel, voltage-dependent, L type, alpha 1F subunit | Cacna1f  | 114493 | 1,01 | up   |
| 6062409 | 7380003 | 1820773 | calcium channel, voltage-dependent, L type, alpha 1F subunit | Cacna1f  | 114493 | 1,11 | up   |
| 6086588 | 7380003 | 1820744 | calcium channel, voltage-dependent, L type, alpha 1F subunit | Cacna1f  | 114493 | 1,11 | up   |

|         |         |         |                                                              |         |        |      |      |
|---------|---------|---------|--------------------------------------------------------------|---------|--------|------|------|
| 6101527 | 7380003 | 1820775 | calcium channel, voltage-dependent, L type, alpha 1F subunit | Cacna1f | 114493 | 1,09 | down |
| 6105284 | 7380003 | 1820751 | calcium channel, voltage-dependent, L type, alpha 1F subunit | Cacna1f | 114493 | 1,01 | up   |
| 6114449 | 7380003 | 1820760 | calcium channel, voltage-dependent, L type, alpha 1F subunit | Cacna1f | 114493 | 1,22 | down |
| 6118625 | 7380003 | 1820780 | calcium channel, voltage-dependent, L type, alpha 1F subunit | Cacna1f | 114493 | 1,01 | down |
| 6138638 | 7380003 | 1820741 | calcium channel, voltage-dependent, L type, alpha 1F subunit | Cacna1f | 114493 | 1,16 | up   |
| 6150268 | 7380003 | 1820762 | calcium channel, voltage-dependent, L type, alpha 1F subunit | Cacna1f | 114493 | 1,15 | down |
| 6154883 | 7380003 | 1820779 | calcium channel, voltage-dependent, L type, alpha 1F subunit | Cacna1f | 114493 | 1,07 | down |
| 6162390 | 7380003 | 1820772 | calcium channel, voltage-dependent, L type, alpha 1F subunit | Cacna1f | 114493 | 1,13 | down |
| 6168234 | 7380003 | 1820743 | calcium channel, voltage-dependent, L type, alpha 1F subunit | Cacna1f | 114493 | 1,06 | up   |
| 6192559 | 7380003 | 1820763 | calcium channel, voltage-dependent, L type, alpha 1F subunit | Cacna1f | 114493 | 1,04 | down |
| 6268220 | 7380003 | 1820773 | calcium channel, voltage-dependent, L type, alpha 1F subunit | Cacna1f | 114493 | 1,40 | down |
| 6275665 | 7380003 | 1820770 | calcium channel, voltage-dependent, L type, alpha 1F subunit | Cacna1f | 114493 | 1,29 | up   |
| 6293524 | 7380003 | 1820740 | calcium channel, voltage-dependent, L type, alpha 1F subunit | Cacna1f | 114493 | 1,11 | down |
| 6322975 | 7380003 | 1820750 | calcium channel, voltage-dependent, L type, alpha 1F subunit | Cacna1f | 114493 | 1,01 | down |
| 6337583 | 7380003 | 1820761 | calcium channel, voltage-dependent, L type, alpha 1F subunit | Cacna1f | 114493 | 1,04 | up   |
| 6341399 | 7380003 | 1820764 | calcium channel, voltage-dependent, L type, alpha 1F subunit | Cacna1f | 114493 | 1,04 | up   |
| 6366063 | 7380003 | 1820754 | calcium channel, voltage-dependent, L type, alpha 1F subunit | Cacna1f | 114493 | 1,91 | down |
| 6399493 | 7380003 | 1820768 | calcium channel, voltage-dependent, L type, alpha 1F subunit | Cacna1f | 114493 | 1,55 | down |
| 6414074 | 7380003 | 1820782 | calcium channel, voltage-dependent, L type, alpha 1F subunit | Cacna1f | 114493 | 1,14 | up   |
| 6442621 | 7380003 | 1820757 | calcium channel, voltage-dependent, L type, alpha 1F subunit | Cacna1f | 114493 | 1,01 | up   |
| 6492076 | 7380003 | 1820767 | calcium channel, voltage-dependent, L type, alpha 1F subunit | Cacna1f | 114493 | 1,06 | up   |
| 6596883 | 7380003 | 1820749 | calcium channel, voltage-dependent, L type, alpha 1F subunit | Cacna1f | 114493 | 1,14 | down |
| 6597683 | 7380003 | 1820782 | calcium channel, voltage-dependent, L type, alpha 1F subunit | Cacna1f | 114493 | 1,40 | down |
| 6607810 | 7380003 | 1820768 | calcium channel, voltage-dependent, L type, alpha 1F subunit | Cacna1f | 114493 | 1,32 | up   |
| 6607904 | 7380003 | 1820753 | calcium channel, voltage-dependent, L type, alpha 1F subunit | Cacna1f | 114493 | 1,23 | down |
| 6623079 | 7380003 | 1820748 | calcium channel, voltage-dependent, L type, alpha 1F subunit | Cacna1f | 114493 | 1,03 | down |
| 6649698 | 7380003 | 1820766 | calcium channel, voltage-dependent, L type, alpha 1F subunit | Cacna1f | 114493 | 1,22 | up   |
| 6689640 | 7380003 | 1820783 | calcium channel, voltage-dependent, L type, alpha 1F subunit | Cacna1f | 114493 | 2,61 | down |
| 6694382 | 7380003 | 1820764 | calcium channel, voltage-dependent, L type, alpha 1F subunit | Cacna1f | 114493 | 1,91 | down |
| 6721179 | 7380003 | 1820765 | calcium channel, voltage-dependent, L type, alpha 1F subunit | Cacna1f | 114493 | 1,72 | down |
| 6730225 | 7380003 | 1820759 | calcium channel, voltage-dependent, L type, alpha 1F subunit | Cacna1f | 114493 | 1,12 | down |
| 5628855 | 7236652 | 1464888 | calcium channel, voltage-dependent, N type, alpha 1B subunit | Cacna1b | 257648 | 1,63 | down |
| 5652403 | 7236652 | 1464904 | calcium channel, voltage-dependent, N type, alpha 1B subunit | Cacna1b | 257648 | 1,14 | down |
| 5653883 | 7236652 | 1464876 | calcium channel, voltage-dependent, N type, alpha 1B subunit | Cacna1b | 257648 | 1,51 | down |
| 5681197 | 7236652 | 1464922 | calcium channel, voltage-dependent, N type, alpha 1B subunit | Cacna1b | 257648 | 1,25 | up   |
| 5685144 | 7236652 | 1464878 | calcium channel, voltage-dependent, N type, alpha 1B subunit | Cacna1b | 257648 | 1,11 | down |
| 5690407 | 7236652 | 1464903 | calcium channel, voltage-dependent, N type, alpha 1B subunit | Cacna1b | 257648 | 1,17 | down |
| 5693289 | 7236652 | 1464910 | calcium channel, voltage-dependent, N type, alpha 1B subunit | Cacna1b | 257648 | 1,17 | down |
| 5693682 | 7236652 | 1464896 | calcium channel, voltage-dependent, N type, alpha 1B subunit | Cacna1b | 257648 | 1,03 | down |
| 5699327 | 7236652 | 1464890 | calcium channel, voltage-dependent, N type, alpha 1B subunit | Cacna1b | 257648 | 1,16 | down |
| 5705366 | 7236652 | 1464900 | calcium channel, voltage-dependent, N type, alpha 1B subunit | Cacna1b | 257648 | 1,03 | up   |
| 5709783 | 7236652 | 1464915 | calcium channel, voltage-dependent, N type, alpha 1B subunit | Cacna1b | 257648 | 1,14 | up   |
| 5719705 | 7236652 | 1464921 | calcium channel, voltage-dependent, N type, alpha 1B subunit | Cacna1b | 257648 | 1,09 | down |
| 5784178 | 7236652 | 1464883 | calcium channel, voltage-dependent, N type, alpha 1B subunit | Cacna1b | 257648 | 1,01 | down |
| 5803586 | 7236652 | 1464878 | calcium channel, voltage-dependent, N type, alpha 1B subunit | Cacna1b | 257648 | 1,01 | up   |
| 5805807 | 7236652 | 1464911 | calcium channel, voltage-dependent, N type, alpha 1B subunit | Cacna1b | 257648 | 1,36 | down |
| 5845214 | 7236652 | 1464894 | calcium channel, voltage-dependent, N type, alpha 1B subunit | Cacna1b | 257648 | 1,33 | down |
| 5856789 | 7236652 | 1464886 | calcium channel, voltage-dependent, N type, alpha 1B subunit | Cacna1b | 257648 | 2,08 | up   |
| 5895445 | 7236652 | 1464877 | calcium channel, voltage-dependent, N type, alpha 1B subunit | Cacna1b | 257648 | 1,60 | down |
| 5919376 | 7236652 | 1464905 | calcium channel, voltage-dependent, N type, alpha 1B subunit | Cacna1b | 257648 | 1,59 | up   |
| 5953563 | 7236652 | 1464923 | calcium channel, voltage-dependent, N type, alpha 1B subunit | Cacna1b | 257648 | 1,31 | up   |
| 5971321 | 7236652 | 1464923 | calcium channel, voltage-dependent, N type, alpha 1B subunit | Cacna1b | 257648 | 1,74 | up   |
| 5978791 | 7236652 | 1464909 | calcium channel, voltage-dependent, N type, alpha 1B subunit | Cacna1b | 257648 | 1,02 | down |
| 5998194 | 7236652 | 1464887 | calcium channel, voltage-dependent, N type, alpha 1B subunit | Cacna1b | 257648 | 1,00 | down |
| 6047224 | 7236652 | 1464899 | calcium channel, voltage-dependent, N type, alpha 1B subunit | Cacna1b | 257648 | 1,06 | up   |
| 6071161 | 7236652 | 1464902 | calcium channel, voltage-dependent, N type, alpha 1B subunit | Cacna1b | 257648 | 1,37 | up   |

|         |         |         |                                                              |         |        |      |      |
|---------|---------|---------|--------------------------------------------------------------|---------|--------|------|------|
| 6073667 | 7236652 | 1464906 | calcium channel, voltage-dependent, N type, alpha 1B subunit | Cacna1b | 257648 | 1,21 | up   |
| 6098253 | 7236652 | 1464893 | calcium channel, voltage-dependent, N type, alpha 1B subunit | Cacna1b | 257648 | 1,06 | up   |
| 6146157 | 7236652 | 1464904 | calcium channel, voltage-dependent, N type, alpha 1B subunit | Cacna1b | 257648 | 1,26 | up   |
| 6195943 | 7236652 | 1464903 | calcium channel, voltage-dependent, N type, alpha 1B subunit | Cacna1b | 257648 | 1,17 | down |
| 6230828 | 7236652 | 1464901 | calcium channel, voltage-dependent, N type, alpha 1B subunit | Cacna1b | 257648 | 1,20 | down |
| 6326611 | 7236652 | 1464917 | calcium channel, voltage-dependent, N type, alpha 1B subunit | Cacna1b | 257648 | 1,02 | up   |
| 6330424 | 7236652 | 1464912 | calcium channel, voltage-dependent, N type, alpha 1B subunit | Cacna1b | 257648 | 1,02 | up   |
| 6337671 | 7236652 | 1464907 | calcium channel, voltage-dependent, N type, alpha 1B subunit | Cacna1b | 257648 | 1,17 | down |
| 6370147 | 7236652 | 1464885 | calcium channel, voltage-dependent, N type, alpha 1B subunit | Cacna1b | 257648 | 1,19 | down |
| 6378756 | 7236652 | 1464881 | calcium channel, voltage-dependent, N type, alpha 1B subunit | Cacna1b | 257648 | 1,11 | up   |
| 6393218 | 7236652 | 1464884 | calcium channel, voltage-dependent, N type, alpha 1B subunit | Cacna1b | 257648 | 1,20 | up   |
| 6442572 | 7236652 | 1464914 | calcium channel, voltage-dependent, N type, alpha 1B subunit | Cacna1b | 257648 | 1,25 | up   |
| 6452785 | 7236652 | 1464916 | calcium channel, voltage-dependent, N type, alpha 1B subunit | Cacna1b | 257648 | 1,38 | down |
| 6476900 | 7236652 | 1464880 | calcium channel, voltage-dependent, N type, alpha 1B subunit | Cacna1b | 257648 | 1,18 | down |
| 6498245 | 7236652 | 1464898 | calcium channel, voltage-dependent, N type, alpha 1B subunit | Cacna1b | 257648 | 1,21 | down |
| 6504476 | 7236652 | 1464911 | calcium channel, voltage-dependent, N type, alpha 1B subunit | Cacna1b | 257648 | 1,19 | down |
| 6515344 | 7236652 | 1464913 | calcium channel, voltage-dependent, N type, alpha 1B subunit | Cacna1b | 257648 | 1,07 | down |
| 6547963 | 7236652 | 1464882 | calcium channel, voltage-dependent, N type, alpha 1B subunit | Cacna1b | 257648 | 1,27 | down |
| 6552597 | 7236652 | 1464920 | calcium channel, voltage-dependent, N type, alpha 1B subunit | Cacna1b | 257648 | 1,02 | up   |
| 6554600 | 7236652 | 1464879 | calcium channel, voltage-dependent, N type, alpha 1B subunit | Cacna1b | 257648 | 1,75 | down |
| 6567583 | 7236652 | 1464877 | calcium channel, voltage-dependent, N type, alpha 1B subunit | Cacna1b | 257648 | 1,22 | up   |
| 6624579 | 7236652 | 1464895 | calcium channel, voltage-dependent, N type, alpha 1B subunit | Cacna1b | 257648 | 1,41 | up   |
| 6634697 | 7236652 | 1464897 | calcium channel, voltage-dependent, N type, alpha 1B subunit | Cacna1b | 257648 | 1,09 | up   |
| 6648581 | 7236652 | 1464908 | calcium channel, voltage-dependent, N type, alpha 1B subunit | Cacna1b | 257648 | 1,13 | down |
| 6680539 | 7236652 | 1464919 | calcium channel, voltage-dependent, N type, alpha 1B subunit | Cacna1b | 257648 | 1,28 | down |
| 6680638 | 7236652 | 1464918 | calcium channel, voltage-dependent, N type, alpha 1B subunit | Cacna1b | 257648 | 1,01 | down |
| 6700864 | 7236652 | 1464892 | calcium channel, voltage-dependent, N type, alpha 1B subunit | Cacna1b | 257648 | 1,15 | down |
| 6716140 | 7236652 | 1464891 | calcium channel, voltage-dependent, N type, alpha 1B subunit | Cacna1b | 257648 | 1,23 | up   |
| 6723785 | 7236652 | 1464923 | calcium channel, voltage-dependent, N type, alpha 1B subunit | Cacna1b | 257648 | 1,14 | up   |
| 6724135 | 7236652 | 1464889 | calcium channel, voltage-dependent, N type, alpha 1B subunit | Cacna1b | 257648 | 1,26 | down |
| 5633770 | 7112511 | 1158406 | calcium channel, voltage-dependent, R type, alpha 1E subunit | Cacna1e | 54234  | 1,06 | down |
| 5676921 | 7112511 | 1158412 | calcium channel, voltage-dependent, R type, alpha 1E subunit | Cacna1e | 54234  | 1,08 | up   |
| 5692190 | 7112511 | 1158413 | calcium channel, voltage-dependent, R type, alpha 1E subunit | Cacna1e | 54234  | 1,15 | up   |
| 5695032 | 7112511 | 1158411 | calcium channel, voltage-dependent, R type, alpha 1E subunit | Cacna1e | 54234  | 1,00 | up   |
| 5713387 | 7112511 | 1158435 | calcium channel, voltage-dependent, R type, alpha 1E subunit | Cacna1e | 54234  | 2,19 | down |
| 5716514 | 7112511 | 1158410 | calcium channel, voltage-dependent, R type, alpha 1E subunit | Cacna1e | 54234  | 1,11 | down |
| 5721757 | 7112511 | 1158407 | calcium channel, voltage-dependent, R type, alpha 1E subunit | Cacna1e | 54234  | 1,29 | up   |
| 5725888 | 7112511 | 1158439 | calcium channel, voltage-dependent, R type, alpha 1E subunit | Cacna1e | 54234  | 1,02 | up   |
| 5729335 | 7112511 | 1158431 | calcium channel, voltage-dependent, R type, alpha 1E subunit | Cacna1e | 54234  | 1,01 | up   |
| 5755346 | 7112511 | 1158427 | calcium channel, voltage-dependent, R type, alpha 1E subunit | Cacna1e | 54234  | 1,33 | up   |
| 5772533 | 7112511 | 1158424 | calcium channel, voltage-dependent, R type, alpha 1E subunit | Cacna1e | 54234  | 1,06 | down |
| 5778662 | 7112511 | 1158419 | calcium channel, voltage-dependent, R type, alpha 1E subunit | Cacna1e | 54234  | 1,05 | up   |
| 5798180 | 7112511 | 1158415 | calcium channel, voltage-dependent, R type, alpha 1E subunit | Cacna1e | 54234  | 1,09 | down |
| 5810409 | 7112511 | 1158426 | calcium channel, voltage-dependent, R type, alpha 1E subunit | Cacna1e | 54234  | 1,06 | up   |
| 5821321 | 7112511 | 1158420 | calcium channel, voltage-dependent, R type, alpha 1E subunit | Cacna1e | 54234  | 1,05 | down |
| 5829382 | 7112511 | 1158436 | calcium channel, voltage-dependent, R type, alpha 1E subunit | Cacna1e | 54234  | 1,03 | up   |
| 5850104 | 7112511 | 1158437 | calcium channel, voltage-dependent, R type, alpha 1E subunit | Cacna1e | 54234  | 1,03 | down |
| 5856211 | 7112511 | 1158452 | calcium channel, voltage-dependent, R type, alpha 1E subunit | Cacna1e | 54234  | 1,36 | up   |
| 5895641 | 7112511 | 1158450 | calcium channel, voltage-dependent, R type, alpha 1E subunit | Cacna1e | 54234  | 1,10 | down |
| 5896059 | 7112511 | 1158409 | calcium channel, voltage-dependent, R type, alpha 1E subunit | Cacna1e | 54234  | 1,12 | up   |
| 5917892 | 7112511 | 1158443 | calcium channel, voltage-dependent, R type, alpha 1E subunit | Cacna1e | 54234  | 1,03 | up   |
| 5955517 | 7112511 | 1158434 | calcium channel, voltage-dependent, R type, alpha 1E subunit | Cacna1e | 54234  | 1,06 | up   |
| 5959197 | 7112511 | 1158425 | calcium channel, voltage-dependent, R type, alpha 1E subunit | Cacna1e | 54234  | 1,00 | up   |
| 6004300 | 7112511 | 1158441 | calcium channel, voltage-dependent, R type, alpha 1E subunit | Cacna1e | 54234  | 1,10 | down |
| 6066123 | 7112511 | 1158453 | calcium channel, voltage-dependent, R type, alpha 1E subunit | Cacna1e | 54234  | 1,42 | up   |
| 6086084 | 7112511 | 1158429 | calcium channel, voltage-dependent, R type, alpha 1E subunit | Cacna1e | 54234  | 1,14 | up   |



|         |         |         |                                                              |         |       |      |      |
|---------|---------|---------|--------------------------------------------------------------|---------|-------|------|------|
| 6089712 | 7112511 | 1158440 | calcium channel, voltage-dependent, R type, alpha 1E subunit | Cacna1e | 54234 | 1,07 | down |
| 6114853 | 7112511 | 1158418 | calcium channel, voltage-dependent, R type, alpha 1E subunit | Cacna1e | 54234 | 1,17 | up   |
| 6119436 | 7112511 | 1158438 | calcium channel, voltage-dependent, R type, alpha 1E subunit | Cacna1e | 54234 | 1,10 | down |
| 6279645 | 7112511 | 1158453 | calcium channel, voltage-dependent, R type, alpha 1E subunit | Cacna1e | 54234 | 1,45 | down |
| 6313331 | 7112511 | 1158428 | calcium channel, voltage-dependent, R type, alpha 1E subunit | Cacna1e | 54234 | 1,10 | down |
| 6366760 | 7112511 | 1158422 | calcium channel, voltage-dependent, R type, alpha 1E subunit | Cacna1e | 54234 | 1,18 | down |
| 6389602 | 7112511 | 1158417 | calcium channel, voltage-dependent, R type, alpha 1E subunit | Cacna1e | 54234 | 1,06 | down |
| 6415673 | 7112511 | 1158442 | calcium channel, voltage-dependent, R type, alpha 1E subunit | Cacna1e | 54234 | 1,25 | down |
| 6426268 | 7112511 | 1158430 | calcium channel, voltage-dependent, R type, alpha 1E subunit | Cacna1e | 54234 | 1,01 | down |
| 6429414 | 7112511 | 1158447 | calcium channel, voltage-dependent, R type, alpha 1E subunit | Cacna1e | 54234 | 1,04 | down |
| 6461408 | 7112511 | 1158448 | calcium channel, voltage-dependent, R type, alpha 1E subunit | Cacna1e | 54234 | 1,55 | up   |
| 6489307 | 7112511 | 1158446 | calcium channel, voltage-dependent, R type, alpha 1E subunit | Cacna1e | 54234 | 1,03 | up   |
| 6556446 | 7112511 | 1158451 | calcium channel, voltage-dependent, R type, alpha 1E subunit | Cacna1e | 54234 | 1,29 | up   |
| 6557893 | 7112511 | 1158432 | calcium channel, voltage-dependent, R type, alpha 1E subunit | Cacna1e | 54234 | 1,12 | down |
| 6559778 | 7112511 | 1158417 | calcium channel, voltage-dependent, R type, alpha 1E subunit | Cacna1e | 54234 | 1,09 | up   |
| 6570584 | 7112511 | 1158444 | calcium channel, voltage-dependent, R type, alpha 1E subunit | Cacna1e | 54234 | 1,02 | down |
| 6588677 | 7112511 | 1158438 | calcium channel, voltage-dependent, R type, alpha 1E subunit | Cacna1e | 54234 | 1,15 | down |
| 6591441 | 7112511 | 1158406 | calcium channel, voltage-dependent, R type, alpha 1E subunit | Cacna1e | 54234 | 1,01 | down |
| 6591824 | 7112511 | 1158408 | calcium channel, voltage-dependent, R type, alpha 1E subunit | Cacna1e | 54234 | 1,24 | down |
| 6599024 | 7112511 | 1158436 | calcium channel, voltage-dependent, R type, alpha 1E subunit | Cacna1e | 54234 | 1,03 | up   |
| 6612369 | 7112511 | 1158433 | calcium channel, voltage-dependent, R type, alpha 1E subunit | Cacna1e | 54234 | 1,25 | up   |
| 6621295 | 7112511 | 1158421 | calcium channel, voltage-dependent, R type, alpha 1E subunit | Cacna1e | 54234 | 1,27 | down |
| 6623490 | 7112511 | 1158405 | calcium channel, voltage-dependent, R type, alpha 1E subunit | Cacna1e | 54234 | 1,21 | down |
| 6640204 | 7112511 | 1158449 | calcium channel, voltage-dependent, R type, alpha 1E subunit | Cacna1e | 54234 | 1,78 | up   |
| 6641235 | 7112511 | 1158414 | calcium channel, voltage-dependent, R type, alpha 1E subunit | Cacna1e | 54234 | 1,05 | down |
| 6680787 | 7112511 | 1158416 | calcium channel, voltage-dependent, R type, alpha 1E subunit | Cacna1e | 54234 | 1,02 | up   |
| 6687487 | 7112511 | 1158423 | calcium channel, voltage-dependent, R type, alpha 1E subunit | Cacna1e | 54234 | 1,40 | down |
| 6730199 | 7112511 | 1158445 | calcium channel, voltage-dependent, R type, alpha 1E subunit | Cacna1e | 54234 | 1,27 | up   |
| 5622534 | 7318953 | 1669656 | calcium channel, voltage-dependent, T type, alpha 1I subunit | Cacna1i | 56827 | 1,19 | up   |
| 5703299 | 7318953 | 1669652 | calcium channel, voltage-dependent, T type, alpha 1I subunit | Cacna1i | 56827 | 1,06 | up   |
| 5710221 | 7318953 | 1669648 | calcium channel, voltage-dependent, T type, alpha 1I subunit | Cacna1i | 56827 | 1,19 | down |
| 5720921 | 7318953 | 1669674 | calcium channel, voltage-dependent, T type, alpha 1I subunit | Cacna1i | 56827 | 1,07 | up   |
| 5803649 | 7318953 | 1669661 | calcium channel, voltage-dependent, T type, alpha 1I subunit | Cacna1i | 56827 | 1,12 | up   |
| 5818555 | 7318953 | 1669664 | calcium channel, voltage-dependent, T type, alpha 1I subunit | Cacna1i | 56827 | 1,22 | down |
| 5848083 | 7318953 | 1669656 | calcium channel, voltage-dependent, T type, alpha 1I subunit | Cacna1i | 56827 | 1,18 | up   |
| 5856253 | 7318953 | 1669672 | calcium channel, voltage-dependent, T type, alpha 1I subunit | Cacna1i | 56827 | 1,07 | down |
| 5919008 | 7318953 | 1669677 | calcium channel, voltage-dependent, T type, alpha 1I subunit | Cacna1i | 56827 | 1,77 | down |
| 5922922 | 7318953 | 1669666 | calcium channel, voltage-dependent, T type, alpha 1I subunit | Cacna1i | 56827 | 1,09 | up   |
| 6007627 | 7318953 | 1669654 | calcium channel, voltage-dependent, T type, alpha 1I subunit | Cacna1i | 56827 | 1,18 | down |
| 6041233 | 7318953 | 1669667 | calcium channel, voltage-dependent, T type, alpha 1I subunit | Cacna1i | 56827 | 1,06 | down |
| 6062153 | 7318953 | 1669647 | calcium channel, voltage-dependent, T type, alpha 1I subunit | Cacna1i | 56827 | 1,26 | down |
| 6130254 | 7318953 | 1669662 | calcium channel, voltage-dependent, T type, alpha 1I subunit | Cacna1i | 56827 | 1,12 | up   |
| 6139100 | 7318953 | 1669683 | calcium channel, voltage-dependent, T type, alpha 1I subunit | Cacna1i | 56827 | 1,13 | down |
| 6158623 | 7318953 | 1669671 | calcium channel, voltage-dependent, T type, alpha 1I subunit | Cacna1i | 56827 | 1,09 | up   |
| 6181945 | 7318953 | 1669649 | calcium channel, voltage-dependent, T type, alpha 1I subunit | Cacna1i | 56827 | 1,21 | up   |
| 6183105 | 7318953 | 1669684 | calcium channel, voltage-dependent, T type, alpha 1I subunit | Cacna1i | 56827 | 1,13 | up   |
| 6190440 | 7318953 | 1669682 | calcium channel, voltage-dependent, T type, alpha 1I subunit | Cacna1i | 56827 | 1,76 | down |
| 6194094 | 7318953 | 1669656 | calcium channel, voltage-dependent, T type, alpha 1I subunit | Cacna1i | 56827 | 1,03 | up   |
| 6247531 | 7318953 | 1669671 | calcium channel, voltage-dependent, T type, alpha 1I subunit | Cacna1i | 56827 | 1,04 | down |
| 6262078 | 7318953 | 1669663 | calcium channel, voltage-dependent, T type, alpha 1I subunit | Cacna1i | 56827 | 1,02 | down |
| 6291155 | 7318953 | 1669680 | calcium channel, voltage-dependent, T type, alpha 1I subunit | Cacna1i | 56827 | 1,12 | down |
| 6326501 | 7318953 | 1669680 | calcium channel, voltage-dependent, T type, alpha 1I subunit | Cacna1i | 56827 | 1,38 | up   |
| 6330354 | 7318953 | 1669678 | calcium channel, voltage-dependent, T type, alpha 1I subunit | Cacna1i | 56827 | 1,05 | up   |
| 6344004 | 7318953 | 1669673 | calcium channel, voltage-dependent, T type, alpha 1I subunit | Cacna1i | 56827 | 1,27 | down |
| 6353966 | 7318953 | 1669675 | calcium channel, voltage-dependent, T type, alpha 1I subunit | Cacna1i | 56827 | 1,22 | up   |
| 6356841 | 7318953 | 1669676 | calcium channel, voltage-dependent, T type, alpha 1I subunit | Cacna1i | 56827 | 1,27 | down |

|         |         |         |                                                                  |         |        |      |      |
|---------|---------|---------|------------------------------------------------------------------|---------|--------|------|------|
| 6410284 | 7318953 | 1669648 | calcium channel, voltage-dependent, T type, alpha II subunit     | Cacna1i | 56827  | 1,07 | up   |
| 6434048 | 7318953 | 1669684 | calcium channel, voltage-dependent, T type, alpha II subunit     | Cacna1i | 56827  | 1,02 | down |
| 6448484 | 7318953 | 1669669 | calcium channel, voltage-dependent, T type, alpha II subunit     | Cacna1i | 56827  | 1,45 | down |
| 6454128 | 7318953 | 1669668 | calcium channel, voltage-dependent, T type, alpha II subunit     | Cacna1i | 56827  | 1,09 | down |
| 6465914 | 7318953 | 1669657 | calcium channel, voltage-dependent, T type, alpha II subunit     | Cacna1i | 56827  | 1,17 | down |
| 6481373 | 7318953 | 1669681 | calcium channel, voltage-dependent, T type, alpha II subunit     | Cacna1i | 56827  | 1,18 | up   |
| 6506382 | 7318953 | 1669651 | calcium channel, voltage-dependent, T type, alpha II subunit     | Cacna1i | 56827  | 1,13 | down |
| 6535043 | 7318953 | 1669659 | calcium channel, voltage-dependent, T type, alpha II subunit     | Cacna1i | 56827  | 1,06 | up   |
| 6578515 | 7318953 | 1669681 | calcium channel, voltage-dependent, T type, alpha II subunit     | Cacna1i | 56827  | 2,10 | down |
| 6588406 | 7318953 | 1669658 | calcium channel, voltage-dependent, T type, alpha II subunit     | Cacna1i | 56827  | 1,20 | down |
| 6592183 | 7318953 | 1669670 | calcium channel, voltage-dependent, T type, alpha II subunit     | Cacna1i | 56827  | 1,44 | down |
| 6602262 | 7318953 | 1669655 | calcium channel, voltage-dependent, T type, alpha II subunit     | Cacna1i | 56827  | 1,16 | down |
| 6630240 | 7318953 | 1669663 | calcium channel, voltage-dependent, T type, alpha II subunit     | Cacna1i | 56827  | 1,07 | up   |
| 6638987 | 7318953 | 1669653 | calcium channel, voltage-dependent, T type, alpha II subunit     | Cacna1i | 56827  | 1,11 | up   |
| 6668650 | 7318953 | 1669679 | calcium channel, voltage-dependent, T type, alpha II subunit     | Cacna1i | 56827  | 1,70 | down |
| 6694776 | 7318953 | 1669650 | calcium channel, voltage-dependent, T type, alpha II subunit     | Cacna1i | 56827  | 1,06 | down |
| 6732492 | 7318953 | 1669660 | calcium channel, voltage-dependent, T type, alpha II subunit     | Cacna1i | 56827  | 1,01 | down |
| 6733816 | 7318953 | 1669665 | calcium channel, voltage-dependent, T type, alpha II subunit     | Cacna1i | 56827  | 1,11 | down |
| 5665206 | 7143904 | 1235803 | calcium homeostasis endoplasmic reticulum protein                | Cherp   | 290614 | 1,03 | up   |
| 5770924 | 7143904 | 1235809 | calcium homeostasis endoplasmic reticulum protein                | Cherp   | 290614 | 1,02 | up   |
| 5783653 | 7143904 | 1235807 | calcium homeostasis endoplasmic reticulum protein                | Cherp   | 290614 | 1,03 | down |
| 5813038 | 7143904 | 1235808 | calcium homeostasis endoplasmic reticulum protein                | Cherp   | 290614 | 1,08 | down |
| 5842134 | 7143904 | 1235814 | calcium homeostasis endoplasmic reticulum protein                | Cherp   | 290614 | 1,21 | down |
| 5950084 | 7143904 | 1235804 | calcium homeostasis endoplasmic reticulum protein                | Cherp   | 290614 | 1,02 | up   |
| 5993066 | 7143904 | 1235807 | calcium homeostasis endoplasmic reticulum protein                | Cherp   | 290614 | 1,19 | up   |
| 6064370 | 7143904 | 1235799 | calcium homeostasis endoplasmic reticulum protein                | Cherp   | 290614 | 1,08 | down |
| 6098662 | 7143904 | 1235811 | calcium homeostasis endoplasmic reticulum protein                | Cherp   | 290614 | 1,02 | down |
| 6122444 | 7143904 | 1235817 | calcium homeostasis endoplasmic reticulum protein                | Cherp   | 290614 | 1,15 | down |
| 6151877 | 7143904 | 1235802 | calcium homeostasis endoplasmic reticulum protein                | Cherp   | 290614 | 1,30 | down |
| 6208686 | 7143904 | 1235799 | calcium homeostasis endoplasmic reticulum protein                | Cherp   | 290614 | 1,33 | down |
| 6214906 | 7143904 | 1235812 | calcium homeostasis endoplasmic reticulum protein                | Cherp   | 290614 | 1,45 | up   |
| 6216196 | 7143904 | 1235815 | calcium homeostasis endoplasmic reticulum protein                | Cherp   | 290614 | 1,01 | down |
| 6242341 | 7143904 | 1235805 | calcium homeostasis endoplasmic reticulum protein                | Cherp   | 290614 | 1,02 | down |
| 6244719 | 7143904 | 1235802 | calcium homeostasis endoplasmic reticulum protein                | Cherp   | 290614 | 1,14 | up   |
| 6246776 | 7143904 | 1235814 | calcium homeostasis endoplasmic reticulum protein                | Cherp   | 290614 | 1,03 | up   |
| 6322899 | 7143904 | 1235817 | calcium homeostasis endoplasmic reticulum protein                | Cherp   | 290614 | 1,04 | up   |
| 6417348 | 7143904 | 1235816 | calcium homeostasis endoplasmic reticulum protein                | Cherp   | 290614 | 1,24 | down |
| 6454535 | 7143904 | 1235806 | calcium homeostasis endoplasmic reticulum protein                | Cherp   | 290614 | 1,11 | down |
| 6521621 | 7143904 | 1235808 | calcium homeostasis endoplasmic reticulum protein                | Cherp   | 290614 | 1,34 | up   |
| 6527514 | 7143904 | 1235800 | calcium homeostasis endoplasmic reticulum protein                | Cherp   | 290614 | 1,15 | up   |
| 6529835 | 7143904 | 1235817 | calcium homeostasis endoplasmic reticulum protein                | Cherp   | 290614 | 1,05 | down |
| 6692635 | 7143904 | 1235810 | calcium homeostasis endoplasmic reticulum protein                | Cherp   | 290614 | 1,11 | down |
| 6736722 | 7143904 | 1235813 | calcium homeostasis endoplasmic reticulum protein                | Cherp   | 290614 | 1,06 | up   |
| 5620731 | 7127912 | 1196135 | calcium/calmodulin-dependent protein kinase (CaM kinase) II beta | Camk2b  | 24245  | 1,03 | down |
| 5630143 | 7127912 | 1196153 | calcium/calmodulin-dependent protein kinase (CaM kinase) II beta | Camk2b  | 24245  | 1,24 | up   |
| 5747699 | 7127912 | 1196153 | calcium/calmodulin-dependent protein kinase (CaM kinase) II beta | Camk2b  | 24245  | 1,40 | up   |
| 5773543 | 7127912 | 1196149 | calcium/calmodulin-dependent protein kinase (CaM kinase) II beta | Camk2b  | 24245  | 1,15 | up   |
| 5795525 | 7127912 | 1196134 | calcium/calmodulin-dependent protein kinase (CaM kinase) II beta | Camk2b  | 24245  | 1,01 | up   |
| 5841917 | 7127912 | 1196152 | calcium/calmodulin-dependent protein kinase (CaM kinase) II beta | Camk2b  | 24245  | 1,10 | up   |
| 5864804 | 7127912 | 1196140 | calcium/calmodulin-dependent protein kinase (CaM kinase) II beta | Camk2b  | 24245  | 2,38 | down |
| 5962609 | 7127912 | 1196151 | calcium/calmodulin-dependent protein kinase (CaM kinase) II beta | Camk2b  | 24245  | 1,07 | up   |
| 6023400 | 7127912 | 1196145 | calcium/calmodulin-dependent protein kinase (CaM kinase) II beta | Camk2b  | 24245  | 1,05 | up   |
| 6040050 | 7127912 | 1196147 | calcium/calmodulin-dependent protein kinase (CaM kinase) II beta | Camk2b  | 24245  | 1,08 | up   |
| 6177571 | 7127912 | 1196148 | calcium/calmodulin-dependent protein kinase (CaM kinase) II beta | Camk2b  | 24245  | 1,11 | up   |
| 6395493 | 7127912 | 1196142 | calcium/calmodulin-dependent protein kinase (CaM kinase) II beta | Camk2b  | 24245  | 1,01 | up   |
| 6420719 | 7127912 | 1196139 | calcium/calmodulin-dependent protein kinase (CaM kinase) II beta | Camk2b  | 24245  | 1,18 | down |

|         |         |         |                                                                  |        |        |      |      |
|---------|---------|---------|------------------------------------------------------------------|--------|--------|------|------|
| 6426144 | 7127912 | 1196146 | calcium/calmodulin-dependent protein kinase (CaM kinase) II beta | Camk2b | 24245  | 1,33 | down |
| 6541511 | 7127912 | 1196138 | calcium/calmodulin-dependent protein kinase (CaM kinase) II beta | Camk2b | 24245  | 1,78 | up   |
| 6549149 | 7127912 | 1196136 | calcium/calmodulin-dependent protein kinase (CaM kinase) II beta | Camk2b | 24245  | 1,69 | down |
| 6579956 | 7127912 | 1196150 | calcium/calmodulin-dependent protein kinase (CaM kinase) II beta | Camk2b | 24245  | 1,14 | up   |
| 6664462 | 7127912 | 1196141 | calcium/calmodulin-dependent protein kinase (CaM kinase) II beta | Camk2b | 24245  | 1,14 | up   |
| 6676331 | 7127912 | 1196144 | calcium/calmodulin-dependent protein kinase (CaM kinase) II beta | Camk2b | 24245  | 1,18 | down |
| 6682796 | 7127912 | 1196137 | calcium/calmodulin-dependent protein kinase (CaM kinase) II beta | Camk2b | 24245  | 1,28 | down |
| 6725030 | 7127912 | 1196143 | calcium/calmodulin-dependent protein kinase (CaM kinase) II beta | Camk2b | 24245  | 1,02 | up   |
| 5683038 | 7198855 | 1373036 | calcium/calmodulin-dependent protein kinase II delta             | Camk2d | 24246  | 1,08 | down |
| 5702967 | 7198855 | 1373046 | calcium/calmodulin-dependent protein kinase II delta             | Camk2d | 24246  | 1,45 | down |
| 5732333 | 7198855 | 1373043 | calcium/calmodulin-dependent protein kinase II delta             | Camk2d | 24246  | 1,04 | down |
| 5905080 | 7198855 | 1373047 | calcium/calmodulin-dependent protein kinase II delta             | Camk2d | 24246  | 1,30 | up   |
| 5925055 | 7198855 | 1373035 | calcium/calmodulin-dependent protein kinase II delta             | Camk2d | 24246  | 1,26 | down |
| 5941144 | 7198855 | 1373038 | calcium/calmodulin-dependent protein kinase II delta             | Camk2d | 24246  | 1,28 | down |
| 6025236 | 7198855 | 1373041 | calcium/calmodulin-dependent protein kinase II delta             | Camk2d | 24246  | 1,05 | up   |
| 6154328 | 7198855 | 1373033 | calcium/calmodulin-dependent protein kinase II delta             | Camk2d | 24246  | 1,30 | up   |
| 6179297 | 7198855 | 1373029 | calcium/calmodulin-dependent protein kinase II delta             | Camk2d | 24246  | 1,19 | up   |
| 6255868 | 7198855 | 1373027 | calcium/calmodulin-dependent protein kinase II delta             | Camk2d | 24246  | 1,05 | up   |
| 6258133 | 7198855 | 1373037 | calcium/calmodulin-dependent protein kinase II delta             | Camk2d | 24246  | 1,63 | up   |
| 6387058 | 7198855 | 1373031 | calcium/calmodulin-dependent protein kinase II delta             | Camk2d | 24246  | 1,16 | up   |
| 6425557 | 7198855 | 1373028 | calcium/calmodulin-dependent protein kinase II delta             | Camk2d | 24246  | 1,30 | up   |
| 6511160 | 7198855 | 1373044 | calcium/calmodulin-dependent protein kinase II delta             | Camk2d | 24246  | 1,17 | up   |
| 6524925 | 7198855 | 1373030 | calcium/calmodulin-dependent protein kinase II delta             | Camk2d | 24246  | 1,12 | down |
| 6565067 | 7198855 | 1373034 | calcium/calmodulin-dependent protein kinase II delta             | Camk2d | 24246  | 2,60 | up   |
| 6607960 | 7198855 | 1373032 | calcium/calmodulin-dependent protein kinase II delta             | Camk2d | 24246  | 1,49 | up   |
| 6627296 | 7198855 | 1373045 | calcium/calmodulin-dependent protein kinase II delta             | Camk2d | 24246  | 1,05 | up   |
| 6656017 | 7198855 | 1373040 | calcium/calmodulin-dependent protein kinase II delta             | Camk2d | 24246  | 2,28 | down |
| 6660098 | 7198855 | 1373042 | calcium/calmodulin-dependent protein kinase II delta             | Camk2d | 24246  | 1,23 | down |
| 6709314 | 7198855 | 1373039 | calcium/calmodulin-dependent protein kinase II delta             | Camk2d | 24246  | 1,01 | up   |
| 5700808 | 7030224 | 961116  | calpain 12                                                       | Capn12 | 308476 | 1,49 | down |
| 5811704 | 7030224 | 961120  | calpain 12                                                       | Capn12 | 308476 | 1,01 | down |
| 5936246 | 7030224 | 961130  | calpain 12                                                       | Capn12 | 308476 | 1,36 | down |
| 5982794 | 7030224 | 961132  | calpain 12                                                       | Capn12 | 308476 | 1,12 | up   |
| 6131773 | 7030224 | 961126  | calpain 12                                                       | Capn12 | 308476 | 1,40 | up   |
| 6149612 | 7030224 | 961127  | calpain 12                                                       | Capn12 | 308476 | 1,03 | up   |
| 6170994 | 7030224 | 961122  | calpain 12                                                       | Capn12 | 308476 | 1,16 | down |
| 6182845 | 7030224 | 961118  | calpain 12                                                       | Capn12 | 308476 | 1,01 | up   |
| 6185175 | 7030224 | 961137  | calpain 12                                                       | Capn12 | 308476 | 1,17 | down |
| 6276141 | 7030224 | 961137  | calpain 12                                                       | Capn12 | 308476 | 1,68 | up   |
| 6308275 | 7030224 | 961129  | calpain 12                                                       | Capn12 | 308476 | 1,16 | down |
| 6389467 | 7030224 | 961125  | calpain 12                                                       | Capn12 | 308476 | 2,02 | up   |
| 6399271 | 7030224 | 961124  | calpain 12                                                       | Capn12 | 308476 | 1,46 | down |
| 6409438 | 7030224 | 961124  | calpain 12                                                       | Capn12 | 308476 | 1,11 | up   |
| 6433409 | 7030224 | 961121  | calpain 12                                                       | Capn12 | 308476 | 1,39 | up   |
| 6448624 | 7030224 | 961128  | calpain 12                                                       | Capn12 | 308476 | 1,00 | up   |
| 6483623 | 7030224 | 961131  | calpain 12                                                       | Capn12 | 308476 | 1,04 | down |
| 6590890 | 7030224 | 961117  | calpain 12                                                       | Capn12 | 308476 | 1,03 | up   |
| 6624414 | 7030224 | 961135  | calpain 12                                                       | Capn12 | 308476 | 1,15 | up   |
| 6696508 | 7030224 | 961136  | calpain 12                                                       | Capn12 | 308476 | 2,09 | up   |
| 6713490 | 7030224 | 961119  | calpain 12                                                       | Capn12 | 308476 | 1,43 | up   |
| 6715518 | 7030224 | 961123  | calpain 12                                                       | Capn12 | 308476 | 1,08 | up   |
| 5658167 | 7295379 | 1609560 | calpain 13                                                       | Capn13 | 362701 | 1,04 | up   |
| 5699713 | 7295379 | 1609573 | calpain 13                                                       | Capn13 | 362701 | 1,15 | down |
| 5705522 | 7295379 | 1609568 | calpain 13                                                       | Capn13 | 362701 | 1,05 | down |
| 5779171 | 7295379 | 1609563 | calpain 13                                                       | Capn13 | 362701 | 1,04 | down |
| 5807893 | 7295379 | 1609572 | calpain 13                                                       | Capn13 | 362701 | 1,07 | up   |

|         |         |         |                          |        |        |      |      |
|---------|---------|---------|--------------------------|--------|--------|------|------|
| 5812658 | 7295379 | 1609571 | calpain 13               | Capn13 | 362701 | 1,03 | up   |
| 5817349 | 7295379 | 1609577 | calpain 13               | Capn13 | 362701 | 1,49 | down |
| 5871610 | 7295379 | 1609580 | calpain 13               | Capn13 | 362701 | 1,01 | up   |
| 5927740 | 7295379 | 1609567 | calpain 13               | Capn13 | 362701 | 1,01 | down |
| 6001911 | 7295379 | 1609560 | calpain 13               | Capn13 | 362701 | 1,09 | down |
| 6013816 | 7295379 | 1609579 | calpain 13               | Capn13 | 362701 | 1,17 | down |
| 6028893 | 7295379 | 1609566 | calpain 13               | Capn13 | 362701 | 1,02 | up   |
| 6028995 | 7295379 | 1609579 | calpain 13               | Capn13 | 362701 | 1,03 | down |
| 6060340 | 7295379 | 1609565 | calpain 13               | Capn13 | 362701 | 1,16 | down |
| 6152748 | 7295379 | 1609576 | calpain 13               | Capn13 | 362701 | 1,05 | up   |
| 6157053 | 7295379 | 1609581 | calpain 13               | Capn13 | 362701 | 1,08 | down |
| 6313634 | 7295379 | 1609570 | calpain 13               | Capn13 | 362701 | 1,01 | up   |
| 6424985 | 7295379 | 1609575 | calpain 13               | Capn13 | 362701 | 1,12 | up   |
| 6429602 | 7295379 | 1609578 | calpain 13               | Capn13 | 362701 | 1,13 | up   |
| 6451426 | 7295379 | 1609569 | calpain 13               | Capn13 | 362701 | 1,01 | up   |
| 6454622 | 7295379 | 1609574 | calpain 13               | Capn13 | 362701 | 1,41 | up   |
| 6482751 | 7295379 | 1609565 | calpain 13               | Capn13 | 362701 | 1,20 | up   |
| 6512839 | 7295379 | 1609564 | calpain 13               | Capn13 | 362701 | 2,18 | down |
| 6576468 | 7295379 | 1609562 | calpain 13               | Capn13 | 362701 | 1,02 | down |
| 6657293 | 7295379 | 1609561 | calpain 13               | Capn13 | 362701 | 1,17 | down |
| 5690841 | 7143240 | 1234172 | calpain 7                | Capn7  | 306260 | 1,05 | down |
| 5697132 | 7143240 | 1234157 | calpain 7                | Capn7  | 306260 | 1,51 | down |
| 5713942 | 7143240 | 1234178 | calpain 7                | Capn7  | 306260 | 1,47 | down |
| 5730134 | 7143240 | 1234171 | calpain 7                | Capn7  | 306260 | 1,04 | down |
| 5741037 | 7143240 | 1234177 | calpain 7                | Capn7  | 306260 | 1,09 | down |
| 5765199 | 7143240 | 1234162 | calpain 7                | Capn7  | 306260 | 1,24 | down |
| 5767578 | 7143240 | 1234160 | calpain 7                | Capn7  | 306260 | 1,06 | up   |
| 5776238 | 7143240 | 1234178 | calpain 7                | Capn7  | 306260 | 1,07 | down |
| 5826761 | 7143240 | 1234165 | calpain 7                | Capn7  | 306260 | 1,04 | down |
| 5882947 | 7143240 | 1234162 | calpain 7                | Capn7  | 306260 | 1,03 | up   |
| 5915328 | 7143240 | 1234166 | calpain 7                | Capn7  | 306260 | 1,02 | down |
| 6003766 | 7143240 | 1234178 | calpain 7                | Capn7  | 306260 | 1,08 | up   |
| 6003919 | 7143240 | 1234169 | calpain 7                | Capn7  | 306260 | 1,41 | up   |
| 6085200 | 7143240 | 1234155 | calpain 7                | Capn7  | 306260 | 1,63 | up   |
| 6211844 | 7143240 | 1234157 | calpain 7                | Capn7  | 306260 | 1,54 | up   |
| 6378018 | 7143240 | 1234166 | calpain 7                | Capn7  | 306260 | 1,06 | down |
| 6430098 | 7143240 | 1234175 | calpain 7                | Capn7  | 306260 | 1,06 | up   |
| 6430354 | 7143240 | 1234172 | calpain 7                | Capn7  | 306260 | 1,17 | down |
| 6472006 | 7143240 | 1234158 | calpain 7                | Capn7  | 306260 | 1,08 | up   |
| 6472301 | 7143240 | 1234178 | calpain 7                | Capn7  | 306260 | 1,14 | down |
| 6502459 | 7143240 | 1234168 | calpain 7                | Capn7  | 306260 | 1,17 | down |
| 6550486 | 7143240 | 1234176 | calpain 7                | Capn7  | 306260 | 1,00 | up   |
| 6551745 | 7143240 | 1234167 | calpain 7                | Capn7  | 306260 | 1,22 | down |
| 6639294 | 7143240 | 1234164 | calpain 7                | Capn7  | 306260 | 1,05 | up   |
| 6669932 | 7143240 | 1234163 | calpain 7                | Capn7  | 306260 | 1,20 | up   |
| 6711693 | 7143240 | 1234174 | calpain 7                | Capn7  | 306260 | 1,04 | down |
| 6728032 | 7143240 | 1234170 | calpain 7                | Capn7  | 306260 | 1,04 | up   |
| 6733232 | 7143240 | 1234178 | calpain 7                | Capn7  | 306260 | 1,26 | down |
| 6746481 | 7143240 | 1234173 | calpain 7                | Capn7  | 306260 | 1,03 | up   |
| 6255479 | 7183182 | 1333559 | calpain, small subunit 2 | Capns2 | 679870 | 1,14 | up   |
| 6473997 | 7183182 | 1333559 | calpain, small subunit 2 | Capns2 | 679870 | 1,43 | down |
| 6604926 | 7183182 | 1333559 | calpain, small subunit 2 | Capns2 | 679870 | 1,93 | up   |
| 5718614 | 7198565 | 1372050 | calponin 3, acidic       | Cnn3   | 54321  | 1,26 | down |
| 5842828 | 7198565 | 1372053 | calponin 3, acidic       | Cnn3   | 54321  | 1,01 | down |
| 5867231 | 7198565 | 1372054 | calponin 3, acidic       | Cnn3   | 54321  | 1,02 | down |
| 6052999 | 7198565 | 1372052 | calponin 3, acidic       | Cnn3   | 54321  | 1,40 | up   |

|         |         |         |                                                  |         |        |      |      |
|---------|---------|---------|--------------------------------------------------|---------|--------|------|------|
| 6058087 | 7198565 | 1372058 | calponin 3, acidic                               | Cnn3    | 54321  | 2,11 | down |
| 6157024 | 7198565 | 1372051 | calponin 3, acidic                               | Cnn3    | 54321  | 1,50 | up   |
| 6287890 | 7198565 | 1372056 | calponin 3, acidic                               | Cnn3    | 54321  | 1,12 | down |
| 6330611 | 7198565 | 1372055 | calponin 3, acidic                               | Cnn3    | 54321  | 1,00 | down |
| 6382150 | 7198565 | 1372057 | calponin 3, acidic                               | Cnn3    | 54321  | 1,09 | down |
| 5659807 | 7241772 | 1477820 | cAMP responsive element binding protein 3-like 1 | Creb3l1 | 362165 | 1,23 | up   |
| 5736059 | 7241772 | 1477813 | cAMP responsive element binding protein 3-like 1 | Creb3l1 | 362165 | 1,05 | down |
| 5746565 | 7241772 | 1477817 | cAMP responsive element binding protein 3-like 1 | Creb3l1 | 362165 | 1,17 | down |
| 5835602 | 7241772 | 1477820 | cAMP responsive element binding protein 3-like 1 | Creb3l1 | 362165 | 1,10 | up   |
| 5857070 | 7241772 | 1477810 | cAMP responsive element binding protein 3-like 1 | Creb3l1 | 362165 | 1,18 | up   |
| 5977146 | 7241772 | 1477815 | cAMP responsive element binding protein 3-like 1 | Creb3l1 | 362165 | 1,03 | up   |
| 5987317 | 7241772 | 1477812 | cAMP responsive element binding protein 3-like 1 | Creb3l1 | 362165 | 1,10 | up   |
| 6023393 | 7241772 | 1477811 | cAMP responsive element binding protein 3-like 1 | Creb3l1 | 362165 | 1,14 | down |
| 6037948 | 7241772 | 1477820 | cAMP responsive element binding protein 3-like 1 | Creb3l1 | 362165 | 1,13 | down |
| 6086526 | 7241772 | 1477820 | cAMP responsive element binding protein 3-like 1 | Creb3l1 | 362165 | 1,73 | up   |
| 6190396 | 7241772 | 1477818 | cAMP responsive element binding protein 3-like 1 | Creb3l1 | 362165 | 3,00 | down |
| 6195086 | 7241772 | 1477818 | cAMP responsive element binding protein 3-like 1 | Creb3l1 | 362165 | 1,34 | up   |
| 6196457 | 7241772 | 1477811 | cAMP responsive element binding protein 3-like 1 | Creb3l1 | 362165 | 1,02 | down |
| 6367335 | 7241772 | 1477814 | cAMP responsive element binding protein 3-like 1 | Creb3l1 | 362165 | 1,08 | up   |
| 6397480 | 7241772 | 1477819 | cAMP responsive element binding protein 3-like 1 | Creb3l1 | 362165 | 1,16 | up   |
| 6457349 | 7241772 | 1477816 | cAMP responsive element binding protein 3-like 1 | Creb3l1 | 362165 | 1,07 | up   |
| 6512211 | 7241772 | 1477815 | cAMP responsive element binding protein 3-like 1 | Creb3l1 | 362165 | 1,14 | down |
| 6560900 | 7241772 | 1477820 | cAMP responsive element binding protein 3-like 1 | Creb3l1 | 362165 | 1,18 | up   |
| 6583990 | 7241772 | 1477808 | cAMP responsive element binding protein 3-like 1 | Creb3l1 | 362165 | 1,01 | up   |
| 6651923 | 7241772 | 1477809 | cAMP responsive element binding protein 3-like 1 | Creb3l1 | 362165 | 1,18 | down |
| 5646701 | 7158671 | 1271968 | cAMP responsive element modulator                | Crem    | 25620  | 1,06 | up   |
| 5835847 | 7158671 | 1271973 | cAMP responsive element modulator                | Crem    | 25620  | 1,67 | up   |
| 5839777 | 7158671 | 1271970 | cAMP responsive element modulator                | Crem    | 25620  | 1,10 | up   |
| 5845564 | 7158671 | 1271969 | cAMP responsive element modulator                | Crem    | 25620  | 1,06 | up   |
| 5993934 | 7158671 | 1271972 | cAMP responsive element modulator                | Crem    | 25620  | 1,20 | down |
| 6059094 | 7158671 | 1271977 | cAMP responsive element modulator                | Crem    | 25620  | 1,21 | down |
| 6207883 | 7158671 | 1271973 | cAMP responsive element modulator                | Crem    | 25620  | 1,73 | up   |
| 6239081 | 7158671 | 1271979 | cAMP responsive element modulator                | Crem    | 25620  | 1,38 | down |
| 6346919 | 7158671 | 1271976 | cAMP responsive element modulator                | Crem    | 25620  | 1,03 | down |
| 6410390 | 7158671 | 1271975 | cAMP responsive element modulator                | Crem    | 25620  | 1,77 | down |
| 6484983 | 7158671 | 1271975 | cAMP responsive element modulator                | Crem    | 25620  | 2,20 | down |
| 6636921 | 7158671 | 1271971 | cAMP responsive element modulator                | Crem    | 25620  | 1,15 | up   |
| 6639301 | 7158671 | 1271974 | cAMP responsive element modulator                | Crem    | 25620  | 1,24 | down |
| 6655252 | 7158671 | 1271969 | cAMP responsive element modulator                | Crem    | 25620  | 1,02 | up   |
| 6708039 | 7158671 | 1271978 | cAMP responsive element modulator                | Crem    | 25620  | 1,38 | down |
| 5624241 | 7271128 | 1550313 | cancer susceptibility candidate 1                | Casc1   | 297720 | 1,12 | down |
| 5677382 | 7271128 | 1550318 | cancer susceptibility candidate 1                | Casc1   | 297720 | 1,12 | up   |
| 5839971 | 7271128 | 1550329 | cancer susceptibility candidate 1                | Casc1   | 297720 | 1,01 | down |
| 5922818 | 7271128 | 1550325 | cancer susceptibility candidate 1                | Casc1   | 297720 | 1,58 | up   |
| 5932631 | 7271128 | 1550321 | cancer susceptibility candidate 1                | Casc1   | 297720 | 1,20 | up   |
| 5956955 | 7271128 | 1550312 | cancer susceptibility candidate 1                | Casc1   | 297720 | 1,70 | down |
| 5983286 | 7271128 | 1550326 | cancer susceptibility candidate 1                | Casc1   | 297720 | 2,58 | up   |
| 5985040 | 7271128 | 1550323 | cancer susceptibility candidate 1                | Casc1   | 297720 | 1,51 | up   |
| 6117505 | 7271128 | 1550330 | cancer susceptibility candidate 1                | Casc1   | 297720 | 1,26 | up   |
| 6260141 | 7271128 | 1550317 | cancer susceptibility candidate 1                | Casc1   | 297720 | 1,05 | up   |
| 6268598 | 7271128 | 1550313 | cancer susceptibility candidate 1                | Casc1   | 297720 | 1,04 | up   |
| 6273452 | 7271128 | 1550323 | cancer susceptibility candidate 1                | Casc1   | 297720 | 1,01 | up   |
| 6386610 | 7271128 | 1550312 | cancer susceptibility candidate 1                | Casc1   | 297720 | 1,06 | down |
| 6467489 | 7271128 | 1550328 | cancer susceptibility candidate 1                | Casc1   | 297720 | 1,81 | up   |
| 6556445 | 7271128 | 1550322 | cancer susceptibility candidate 1                | Casc1   | 297720 | 1,06 | down |
| 6703464 | 7271128 | 1550320 | cancer susceptibility candidate 1                | Casc1   | 297720 | 1,48 | down |

|         |         |         |                                                         |       |        |      |      |
|---------|---------|---------|---------------------------------------------------------|-------|--------|------|------|
| 6723812 | 7271128 | 1550324 | cancer susceptibility candidate 1                       | Casc1 | 297720 | 1,07 | up   |
| 5650623 | 7355609 | 1758999 | carbamoyl-phosphate synthetase 1, mitochondrial         | Cps1  | 497840 | 1,13 | up   |
| 5697485 | 7355609 | 1758978 | carbamoyl-phosphate synthetase 1, mitochondrial         | Cps1  | 497840 | 1,01 | down |
| 5698016 | 7355609 | 1758982 | carbamoyl-phosphate synthetase 1, mitochondrial         | Cps1  | 497840 | 1,42 | down |
| 5781249 | 7355609 | 1758981 | carbamoyl-phosphate synthetase 1, mitochondrial         | Cps1  | 497840 | 1,00 | up   |
| 5802162 | 7355609 | 1758976 | carbamoyl-phosphate synthetase 1, mitochondrial         | Cps1  | 497840 | 1,03 | up   |
| 5806598 | 7355609 | 1759003 | carbamoyl-phosphate synthetase 1, mitochondrial         | Cps1  | 497840 | 1,10 | up   |
| 5812191 | 7355609 | 1758993 | carbamoyl-phosphate synthetase 1, mitochondrial         | Cps1  | 497840 | 1,05 | down |
| 5822310 | 7355609 | 1758983 | carbamoyl-phosphate synthetase 1, mitochondrial         | Cps1  | 497840 | 1,10 | down |
| 5923386 | 7355609 | 1758986 | carbamoyl-phosphate synthetase 1, mitochondrial         | Cps1  | 497840 | 1,02 | up   |
| 5941840 | 7355609 | 1758973 | carbamoyl-phosphate synthetase 1, mitochondrial         | Cps1  | 497840 | 1,05 | down |
| 5988922 | 7355609 | 1758988 | carbamoyl-phosphate synthetase 1, mitochondrial         | Cps1  | 497840 | 1,10 | down |
| 6016540 | 7355609 | 1758995 | carbamoyl-phosphate synthetase 1, mitochondrial         | Cps1  | 497840 | 2,07 | up   |
| 6031473 | 7355609 | 1758992 | carbamoyl-phosphate synthetase 1, mitochondrial         | Cps1  | 497840 | 1,07 | up   |
| 6032891 | 7355609 | 1758994 | carbamoyl-phosphate synthetase 1, mitochondrial         | Cps1  | 497840 | 1,02 | up   |
| 6049790 | 7355609 | 1758985 | carbamoyl-phosphate synthetase 1, mitochondrial         | Cps1  | 497840 | 1,04 | down |
| 6085309 | 7355609 | 1758979 | carbamoyl-phosphate synthetase 1, mitochondrial         | Cps1  | 497840 | 1,42 | down |
| 6100682 | 7355609 | 1758998 | carbamoyl-phosphate synthetase 1, mitochondrial         | Cps1  | 497840 | 1,38 | up   |
| 6143428 | 7355609 | 1758991 | carbamoyl-phosphate synthetase 1, mitochondrial         | Cps1  | 497840 | 1,43 | up   |
| 6144557 | 7355609 | 1758996 | carbamoyl-phosphate synthetase 1, mitochondrial         | Cps1  | 497840 | 1,03 | down |
| 6153734 | 7355609 | 1758972 | carbamoyl-phosphate synthetase 1, mitochondrial         | Cps1  | 497840 | 1,20 | down |
| 6183737 | 7355609 | 1758977 | carbamoyl-phosphate synthetase 1, mitochondrial         | Cps1  | 497840 | 1,02 | up   |
| 6194418 | 7355609 | 1758987 | carbamoyl-phosphate synthetase 1, mitochondrial         | Cps1  | 497840 | 1,39 | down |
| 6200216 | 7355609 | 1759002 | carbamoyl-phosphate synthetase 1, mitochondrial         | Cps1  | 497840 | 1,16 | down |
| 6250499 | 7355609 | 1759005 | carbamoyl-phosphate synthetase 1, mitochondrial         | Cps1  | 497840 | 1,06 | up   |
| 6254906 | 7355609 | 1758975 | carbamoyl-phosphate synthetase 1, mitochondrial         | Cps1  | 497840 | 1,05 | down |
| 6284426 | 7355609 | 1759000 | carbamoyl-phosphate synthetase 1, mitochondrial         | Cps1  | 497840 | 1,57 | down |
| 6370163 | 7355609 | 1759001 | carbamoyl-phosphate synthetase 1, mitochondrial         | Cps1  | 497840 | 1,12 | down |
| 6373204 | 7355609 | 1758974 | carbamoyl-phosphate synthetase 1, mitochondrial         | Cps1  | 497840 | 1,41 | up   |
| 6409220 | 7355609 | 1759007 | carbamoyl-phosphate synthetase 1, mitochondrial         | Cps1  | 497840 | 1,09 | down |
| 6425664 | 7355609 | 1758997 | carbamoyl-phosphate synthetase 1, mitochondrial         | Cps1  | 497840 | 1,23 | down |
| 6450449 | 7355609 | 1759006 | carbamoyl-phosphate synthetase 1, mitochondrial         | Cps1  | 497840 | 1,05 | down |
| 6577963 | 7355609 | 1758984 | carbamoyl-phosphate synthetase 1, mitochondrial         | Cps1  | 497840 | 1,13 | up   |
| 6620855 | 7355609 | 1758996 | carbamoyl-phosphate synthetase 1, mitochondrial         | Cps1  | 497840 | 1,42 | up   |
| 6698474 | 7355609 | 1759008 | carbamoyl-phosphate synthetase 1, mitochondrial         | Cps1  | 497840 | 1,02 | down |
| 6702381 | 7355609 | 1758980 | carbamoyl-phosphate synthetase 1, mitochondrial         | Cps1  | 497840 | 1,36 | down |
| 6712562 | 7355609 | 1758989 | carbamoyl-phosphate synthetase 1, mitochondrial         | Cps1  | 497840 | 1,19 | down |
| 6722834 | 7355609 | 1759004 | carbamoyl-phosphate synthetase 1, mitochondrial         | Cps1  | 497840 | 1,08 | down |
| 6734622 | 7355609 | 1758990 | carbamoyl-phosphate synthetase 1, mitochondrial         | Cps1  | 497840 | 1,06 | down |
| 5734798 | 7230218 | 1447760 | carbohydrate (keratan sulfate Gal-6) sulfotransferase 1 | Chst1 | 295934 | 1,24 | up   |
| 5944317 | 7230218 | 1447760 | carbohydrate (keratan sulfate Gal-6) sulfotransferase 1 | Chst1 | 295934 | 2,71 | down |
| 6115307 | 7230218 | 1447761 | carbohydrate (keratan sulfate Gal-6) sulfotransferase 1 | Chst1 | 295934 | 1,05 | up   |
| 6234977 | 7230218 | 1447759 | carbohydrate (keratan sulfate Gal-6) sulfotransferase 1 | Chst1 | 295934 | 1,10 | up   |
| 5687552 | 7057966 | 1026814 | carboxypeptidase X (M14 family), member 2               | Cpxm2 | 293566 | 2,15 | down |
| 5693830 | 7057966 | 1026827 | carboxypeptidase X (M14 family), member 2               | Cpxm2 | 293566 | 1,15 | up   |
| 5859526 | 7057966 | 1026815 | carboxypeptidase X (M14 family), member 2               | Cpxm2 | 293566 | 1,20 | up   |
| 5877472 | 7057966 | 1026842 | carboxypeptidase X (M14 family), member 2               | Cpxm2 | 293566 | 1,16 | down |
| 5900612 | 7057966 | 1026826 | carboxypeptidase X (M14 family), member 2               | Cpxm2 | 293566 | 1,89 | down |
| 6028416 | 7057966 | 1026821 | carboxypeptidase X (M14 family), member 2               | Cpxm2 | 293566 | 1,11 | down |
| 6143441 | 7057966 | 1026816 | carboxypeptidase X (M14 family), member 2               | Cpxm2 | 293566 | 1,00 | up   |
| 6152895 | 7057966 | 1026827 | carboxypeptidase X (M14 family), member 2               | Cpxm2 | 293566 | 1,22 | up   |
| 6454916 | 7057966 | 1026818 | carboxypeptidase X (M14 family), member 2               | Cpxm2 | 293566 | 1,12 | down |
| 6491584 | 7057966 | 1026817 | carboxypeptidase X (M14 family), member 2               | Cpxm2 | 293566 | 1,32 | down |
| 6511597 | 7057966 | 1026834 | carboxypeptidase X (M14 family), member 2               | Cpxm2 | 293566 | 1,04 | down |
| 6668687 | 7057966 | 1026832 | carboxypeptidase X (M14 family), member 2               | Cpxm2 | 293566 | 1,37 | down |
| 6670337 | 7057966 | 1026822 | carboxypeptidase X (M14 family), member 2               | Cpxm2 | 293566 | 1,66 | down |

|         |         |         |                                                            |          |        |      |      |
|---------|---------|---------|------------------------------------------------------------|----------|--------|------|------|
| 6681603 | 7057966 | 1026820 | carboxypeptidase X (M14 family), member 2                  | Cpxm2    | 293566 | 1,73 | down |
| 6730805 | 7057966 | 1026837 | carboxypeptidase X (M14 family), member 2                  | Cpxm2    | 293566 | 1,02 | up   |
| 5727734 | 7120108 | 1177680 | carboxypeptidase Z                                         | Cpz      | 83575  | 1,00 | down |
| 5838440 | 7120108 | 1177685 | carboxypeptidase Z                                         | Cpz      | 83575  | 1,51 | down |
| 6085836 | 7120108 | 1177678 | carboxypeptidase Z                                         | Cpz      | 83575  | 1,44 | up   |
| 6201411 | 7120108 | 1177686 | carboxypeptidase Z                                         | Cpz      | 83575  | 1,17 | up   |
| 6217652 | 7120108 | 1177677 | carboxypeptidase Z                                         | Cpz      | 83575  | 2,11 | down |
| 6272468 | 7120108 | 1177681 | carboxypeptidase Z                                         | Cpz      | 83575  | 1,24 | up   |
| 6301256 | 7120108 | 1177686 | carboxypeptidase Z                                         | Cpz      | 83575  | 1,20 | up   |
| 6303809 | 7120108 | 1177679 | carboxypeptidase Z                                         | Cpz      | 83575  | 1,21 | up   |
| 6408183 | 7120108 | 1177675 | carboxypeptidase Z                                         | Cpz      | 83575  | 1,33 | up   |
| 6422826 | 7120108 | 1177684 | carboxypeptidase Z                                         | Cpz      | 83575  | 1,02 | down |
| 6430275 | 7120108 | 1177683 | carboxypeptidase Z                                         | Cpz      | 83575  | 1,15 | down |
| 6535018 | 7120108 | 1177686 | carboxypeptidase Z                                         | Cpz      | 83575  | 1,20 | up   |
| 6545268 | 7120108 | 1177686 | carboxypeptidase Z                                         | Cpz      | 83575  | 1,02 | down |
| 6585872 | 7120108 | 1177676 | carboxypeptidase Z                                         | Cpz      | 83575  | 1,03 | up   |
| 6661892 | 7120108 | 1177682 | carboxypeptidase Z                                         | Cpz      | 83575  | 1,11 | up   |
| 5690028 | 7029675 | 959960  | carcinoembryonic antigen-related cell adhesion molecule 10 | Ceacam10 | 287009 | 1,03 | up   |
| 6337895 | 7029675 | 959959  | carcinoembryonic antigen-related cell adhesion molecule 10 | Ceacam10 | 287009 | 1,15 | down |
| 6659791 | 7029675 | 959958  | carcinoembryonic antigen-related cell adhesion molecule 10 | Ceacam10 | 287009 | 2,35 | down |
| 6710411 | 7029675 | 959958  | carcinoembryonic antigen-related cell adhesion molecule 10 | Ceacam10 | 287009 | 1,24 | up   |
| 5675933 | 7029208 | 959116  | carcinoembryonic antigen-related cell adhesion molecule 3  | Ceacam3  | 24926  | 1,01 | up   |
| 5857932 | 7029208 | 959112  | carcinoembryonic antigen-related cell adhesion molecule 3  | Ceacam3  | 24926  | 1,03 | up   |
| 5916045 | 7029208 | 959115  | carcinoembryonic antigen-related cell adhesion molecule 3  | Ceacam3  | 24926  | 1,01 | down |
| 6087481 | 7029208 | 959117  | carcinoembryonic antigen-related cell adhesion molecule 3  | Ceacam3  | 24926  | 1,18 | down |
| 6214466 | 7029208 | 959117  | carcinoembryonic antigen-related cell adhesion molecule 3  | Ceacam3  | 24926  | 1,33 | up   |
| 6232629 | 7029208 | 959114  | carcinoembryonic antigen-related cell adhesion molecule 3  | Ceacam3  | 24926  | 1,02 | up   |
| 6374059 | 7029208 | 959113  | carcinoembryonic antigen-related cell adhesion molecule 3  | Ceacam3  | 24926  | 1,02 | down |
| 6471197 | 7029208 | 959117  | carcinoembryonic antigen-related cell adhesion molecule 3  | Ceacam3  | 24926  | 1,46 | down |
| 6491310 | 7029208 | 959117  | carcinoembryonic antigen-related cell adhesion molecule 3  | Ceacam3  | 24926  | 1,28 | up   |
| 6677514 | 7029208 | 959111  | carcinoembryonic antigen-related cell adhesion molecule 3  | Ceacam3  | 24926  | 2,27 | up   |
| 6745614 | 7029208 | 959117  | carcinoembryonic antigen-related cell adhesion molecule 3  | Ceacam3  | 24926  | 1,42 | down |
| 5697501 | 7261367 | 1526171 | carnitine O-octanoyltransferase                            | Crot     | 83842  | 1,06 | up   |
| 5715224 | 7261367 | 1526182 | carnitine O-octanoyltransferase                            | Crot     | 83842  | 1,22 | up   |
| 5794151 | 7261367 | 1526166 | carnitine O-octanoyltransferase                            | Crot     | 83842  | 1,16 | down |
| 5849113 | 7261367 | 1526170 | carnitine O-octanoyltransferase                            | Crot     | 83842  | 1,40 | down |
| 5877000 | 7261367 | 1526173 | carnitine O-octanoyltransferase                            | Crot     | 83842  | 1,05 | up   |
| 5906439 | 7261367 | 1526183 | carnitine O-octanoyltransferase                            | Crot     | 83842  | 1,22 | down |
| 5947995 | 7261367 | 1526169 | carnitine O-octanoyltransferase                            | Crot     | 83842  | 1,37 | down |
| 5951264 | 7261367 | 1526181 | carnitine O-octanoyltransferase                            | Crot     | 83842  | 1,27 | down |
| 6074703 | 7261367 | 1526180 | carnitine O-octanoyltransferase                            | Crot     | 83842  | 1,64 | up   |
| 6080061 | 7261367 | 1526177 | carnitine O-octanoyltransferase                            | Crot     | 83842  | 1,20 | up   |
| 6084556 | 7261367 | 1526167 | carnitine O-octanoyltransferase                            | Crot     | 83842  | 1,49 | down |
| 6171251 | 7261367 | 1526166 | carnitine O-octanoyltransferase                            | Crot     | 83842  | 1,37 | down |
| 6191105 | 7261367 | 1526168 | carnitine O-octanoyltransferase                            | Crot     | 83842  | 1,12 | up   |
| 6194796 | 7261367 | 1526176 | carnitine O-octanoyltransferase                            | Crot     | 83842  | 2,07 | up   |
| 6261924 | 7261367 | 1526167 | carnitine O-octanoyltransferase                            | Crot     | 83842  | 1,20 | up   |
| 6326514 | 7261367 | 1526172 | carnitine O-octanoyltransferase                            | Crot     | 83842  | 1,25 | down |
| 6417239 | 7261367 | 1526178 | carnitine O-octanoyltransferase                            | Crot     | 83842  | 1,35 | up   |
| 6426975 | 7261367 | 1526174 | carnitine O-octanoyltransferase                            | Crot     | 83842  | 1,20 | down |
| 6628498 | 7261367 | 1526175 | carnitine O-octanoyltransferase                            | Crot     | 83842  | 1,37 | up   |
| 6630059 | 7261367 | 1526179 | carnitine O-octanoyltransferase                            | Crot     | 83842  | 1,07 | up   |
| 5719592 | 7050780 | 1011382 | carnitine palmitoyltransferase 1c                          | Cpt1c    | 308579 | 1,84 | down |
| 5725395 | 7050780 | 1011386 | carnitine palmitoyltransferase 1c                          | Cpt1c    | 308579 | 1,68 | up   |
| 5730448 | 7050780 | 1011374 | carnitine palmitoyltransferase 1c                          | Cpt1c    | 308579 | 1,18 | down |
| 5763157 | 7050780 | 1011371 | carnitine palmitoyltransferase 1c                          | Cpt1c    | 308579 | 1,59 | up   |

|         |         |         |                                                 |         |        |      |      |
|---------|---------|---------|-------------------------------------------------|---------|--------|------|------|
| 5783121 | 7050780 | 1011377 | carnitine palmitoyltransferase 1c               | Cpt1c   | 308579 | 1,23 | up   |
| 5784662 | 7050780 | 1011370 | carnitine palmitoyltransferase 1c               | Cpt1c   | 308579 | 1,46 | down |
| 5946755 | 7050780 | 1011371 | carnitine palmitoyltransferase 1c               | Cpt1c   | 308579 | 1,05 | up   |
| 5948232 | 7050780 | 1011373 | carnitine palmitoyltransferase 1c               | Cpt1c   | 308579 | 1,18 | up   |
| 6033728 | 7050780 | 1011384 | carnitine palmitoyltransferase 1c               | Cpt1c   | 308579 | 1,03 | up   |
| 6062824 | 7050780 | 1011385 | carnitine palmitoyltransferase 1c               | Cpt1c   | 308579 | 1,30 | down |
| 6079873 | 7050780 | 1011377 | carnitine palmitoyltransferase 1c               | Cpt1c   | 308579 | 1,21 | up   |
| 6094388 | 7050780 | 1011379 | carnitine palmitoyltransferase 1c               | Cpt1c   | 308579 | 1,07 | up   |
| 6126752 | 7050780 | 1011379 | carnitine palmitoyltransferase 1c               | Cpt1c   | 308579 | 1,18 | down |
| 6127143 | 7050780 | 1011375 | carnitine palmitoyltransferase 1c               | Cpt1c   | 308579 | 1,03 | down |
| 6143095 | 7050780 | 1011370 | carnitine palmitoyltransferase 1c               | Cpt1c   | 308579 | 1,39 | down |
| 6149644 | 7050780 | 1011380 | carnitine palmitoyltransferase 1c               | Cpt1c   | 308579 | 1,13 | down |
| 6216068 | 7050780 | 1011390 | carnitine palmitoyltransferase 1c               | Cpt1c   | 308579 | 1,15 | down |
| 6233046 | 7050780 | 1011385 | carnitine palmitoyltransferase 1c               | Cpt1c   | 308579 | 1,03 | up   |
| 6382113 | 7050780 | 1011385 | carnitine palmitoyltransferase 1c               | Cpt1c   | 308579 | 1,09 | up   |
| 6432513 | 7050780 | 1011378 | carnitine palmitoyltransferase 1c               | Cpt1c   | 308579 | 1,22 | down |
| 6443387 | 7050780 | 1011372 | carnitine palmitoyltransferase 1c               | Cpt1c   | 308579 | 1,16 | down |
| 6576767 | 7050780 | 1011377 | carnitine palmitoyltransferase 1c               | Cpt1c   | 308579 | 1,23 | down |
| 6611573 | 7050780 | 1011373 | carnitine palmitoyltransferase 1c               | Cpt1c   | 308579 | 1,41 | up   |
| 6664612 | 7050780 | 1011381 | carnitine palmitoyltransferase 1c               | Cpt1c   | 308579 | 1,05 | down |
| 6732949 | 7050780 | 1011378 | carnitine palmitoyltransferase 1c               | Cpt1c   | 308579 | 1,96 | up   |
| 6736229 | 7050780 | 1011376 | carnitine palmitoyltransferase 1c               | Cpt1c   | 308579 | 1,35 | down |
| 5631354 | 7202911 | 1382474 | CART prepropeptide                              | Cartpt  | 29131  | 1,15 | up   |
| 5665895 | 7202911 | 1382475 | CART prepropeptide                              | Cartpt  | 29131  | 1,36 | up   |
| 5882639 | 7202911 | 1382476 | CART prepropeptide                              | Cartpt  | 29131  | 1,38 | down |
| 6082908 | 7202911 | 1382476 | CART prepropeptide                              | Cartpt  | 29131  | 2,37 | up   |
| 6088666 | 7202911 | 1382474 | CART prepropeptide                              | Cartpt  | 29131  | 1,13 | down |
| 6239426 | 7202911 | 1382477 | CART prepropeptide                              | Cartpt  | 29131  | 1,06 | down |
| 5731848 | 7042159 | 990854  | cartilage acidic protein 1                      | Crtac1  | 171438 | 1,06 | up   |
| 5734467 | 7042159 | 990854  | cartilage acidic protein 1                      | Crtac1  | 171438 | 2,50 | down |
| 5773990 | 7042159 | 990850  | cartilage acidic protein 1                      | Crtac1  | 171438 | 1,06 | up   |
| 6045596 | 7042159 | 990854  | cartilage acidic protein 1                      | Crtac1  | 171438 | 1,32 | up   |
| 6159848 | 7042159 | 990852  | cartilage acidic protein 1                      | Crtac1  | 171438 | 1,14 | down |
| 6257734 | 7042159 | 990853  | cartilage acidic protein 1                      | Crtac1  | 171438 | 1,02 | down |
| 6445780 | 7042159 | 990849  | cartilage acidic protein 1                      | Crtac1  | 171438 | 1,67 | down |
| 6639248 | 7042159 | 990851  | cartilage acidic protein 1                      | Crtac1  | 171438 | 1,12 | down |
| 5808723 | 7337380 | 1713039 | casein kinase 1, gamma 1                        | Csnk1g1 | 64086  | 1,05 | up   |
| 5862872 | 7337380 | 1713043 | casein kinase 1, gamma 1                        | Csnk1g1 | 64086  | 1,09 | down |
| 5907319 | 7337380 | 1713036 | casein kinase 1, gamma 1                        | Csnk1g1 | 64086  | 1,15 | down |
| 6010683 | 7337380 | 1713041 | casein kinase 1, gamma 1                        | Csnk1g1 | 64086  | 1,13 | up   |
| 6017759 | 7337380 | 1713035 | casein kinase 1, gamma 1                        | Csnk1g1 | 64086  | 1,18 | up   |
| 6045771 | 7337380 | 1713040 | casein kinase 1, gamma 1                        | Csnk1g1 | 64086  | 1,03 | up   |
| 6120679 | 7337380 | 1713044 | casein kinase 1, gamma 1                        | Csnk1g1 | 64086  | 1,36 | up   |
| 6245211 | 7337380 | 1713045 | casein kinase 1, gamma 1                        | Csnk1g1 | 64086  | 2,03 | down |
| 6325483 | 7337380 | 1713045 | casein kinase 1, gamma 1                        | Csnk1g1 | 64086  | 2,42 | down |
| 6369287 | 7337380 | 1713037 | casein kinase 1, gamma 1                        | Csnk1g1 | 64086  | 1,01 | up   |
| 6482717 | 7337380 | 1713043 | casein kinase 1, gamma 1                        | Csnk1g1 | 64086  | 1,09 | down |
| 6552721 | 7337380 | 1713038 | casein kinase 1, gamma 1                        | Csnk1g1 | 64086  | 1,10 | down |
| 6561157 | 7337380 | 1713042 | casein kinase 1, gamma 1                        | Csnk1g1 | 64086  | 1,17 | up   |
| 6631897 | 7337380 | 1713034 | casein kinase 1, gamma 1                        | Csnk1g1 | 64086  | 1,64 | down |
| 6742064 | 7337380 | 1713036 | casein kinase 1, gamma 1                        | Csnk1g1 | 64086  | 1,01 | down |
| 5939936 | 7332570 | 1701737 | caspase 4, apoptosis-related cysteine peptidase | Casp4   | 114555 | 2,94 | down |
| 5994357 | 7332570 | 1701731 | caspase 4, apoptosis-related cysteine peptidase | Casp4   | 114555 | 2,25 | down |
| 6202145 | 7332570 | 1701732 | caspase 4, apoptosis-related cysteine peptidase | Casp4   | 114555 | 1,28 | up   |
| 6210375 | 7332570 | 1701736 | caspase 4, apoptosis-related cysteine peptidase | Casp4   | 114555 | 1,05 | down |
| 6490637 | 7332570 | 1701734 | caspase 4, apoptosis-related cysteine peptidase | Casp4   | 114555 | 1,88 | up   |



|         |         |         |                                                  |        |        |      |      |
|---------|---------|---------|--------------------------------------------------|--------|--------|------|------|
| 6515331 | 7332570 | 1701733 | caspase 4, apoptosis-related cysteine peptidase  | Casp4  | 114555 | 1,28 | up   |
| 6523876 | 7332570 | 1701732 | caspase 4, apoptosis-related cysteine peptidase  | Casp4  | 114555 | 1,96 | down |
| 6586119 | 7332570 | 1701732 | caspase 4, apoptosis-related cysteine peptidase  | Casp4  | 114555 | 1,13 | down |
| 6665227 | 7332570 | 1701735 | caspase 4, apoptosis-related cysteine peptidase  | Casp4  | 114555 | 1,90 | up   |
| 5643950 | 7096842 | 1119245 | caspase recruitment domain family, member 11     | Card11 | 304314 | 1,15 | down |
| 5684568 | 7096842 | 1119249 | caspase recruitment domain family, member 11     | Card11 | 304314 | 1,10 | down |
| 5705173 | 7096842 | 1119242 | caspase recruitment domain family, member 11     | Card11 | 304314 | 1,03 | up   |
| 5715528 | 7096842 | 1119243 | caspase recruitment domain family, member 11     | Card11 | 304314 | 1,04 | up   |
| 5720629 | 7096842 | 1119244 | caspase recruitment domain family, member 11     | Card11 | 304314 | 1,31 | up   |
| 5766313 | 7096842 | 1119250 | caspase recruitment domain family, member 11     | Card11 | 304314 | 1,49 | down |
| 5803519 | 7096842 | 1119252 | caspase recruitment domain family, member 11     | Card11 | 304314 | 1,06 | down |
| 5810516 | 7096842 | 1119259 | caspase recruitment domain family, member 11     | Card11 | 304314 | 1,22 | down |
| 5815687 | 7096842 | 1119256 | caspase recruitment domain family, member 11     | Card11 | 304314 | 2,22 | down |
| 5921671 | 7096842 | 1119257 | caspase recruitment domain family, member 11     | Card11 | 304314 | 1,06 | up   |
| 5997758 | 7096842 | 1119247 | caspase recruitment domain family, member 11     | Card11 | 304314 | 1,10 | up   |
| 6112177 | 7096842 | 1119251 | caspase recruitment domain family, member 11     | Card11 | 304314 | 1,06 | up   |
| 6190427 | 7096842 | 1119258 | caspase recruitment domain family, member 11     | Card11 | 304314 | 1,91 | down |
| 6220165 | 7096842 | 1119248 | caspase recruitment domain family, member 11     | Card11 | 304314 | 1,90 | up   |
| 6263410 | 7096842 | 1119233 | caspase recruitment domain family, member 11     | Card11 | 304314 | 1,42 | down |
| 6273591 | 7096842 | 1119246 | caspase recruitment domain family, member 11     | Card11 | 304314 | 1,26 | down |
| 6276879 | 7096842 | 1119260 | caspase recruitment domain family, member 11     | Card11 | 304314 | 2,26 | up   |
| 6308678 | 7096842 | 1119254 | caspase recruitment domain family, member 11     | Card11 | 304314 | 1,05 | up   |
| 6346310 | 7096842 | 1119255 | caspase recruitment domain family, member 11     | Card11 | 304314 | 1,02 | down |
| 6353237 | 7096842 | 1119225 | caspase recruitment domain family, member 11     | Card11 | 304314 | 1,14 | up   |
| 6371841 | 7096842 | 1119245 | caspase recruitment domain family, member 11     | Card11 | 304314 | 1,06 | down |
| 6385467 | 7096842 | 1119260 | caspase recruitment domain family, member 11     | Card11 | 304314 | 1,73 | down |
| 6437542 | 7096842 | 1119238 | caspase recruitment domain family, member 11     | Card11 | 304314 | 1,03 | down |
| 6447929 | 7096842 | 1119235 | caspase recruitment domain family, member 11     | Card11 | 304314 | 1,23 | up   |
| 6559498 | 7096842 | 1119239 | caspase recruitment domain family, member 11     | Card11 | 304314 | 1,15 | up   |
| 6598996 | 7096842 | 1119260 | caspase recruitment domain family, member 11     | Card11 | 304314 | 1,18 | up   |
| 6662487 | 7096842 | 1119254 | caspase recruitment domain family, member 11     | Card11 | 304314 | 1,41 | down |
| 6663553 | 7096842 | 1119253 | caspase recruitment domain family, member 11     | Card11 | 304314 | 1,25 | up   |
| 6721895 | 7096842 | 1119240 | caspase recruitment domain family, member 11     | Card11 | 304314 | 1,56 | up   |
| 5653474 | 7230653 | 1448940 | catalase                                         | Cat    | 24248  | 1,14 | up   |
| 5776384 | 7230653 | 1448949 | catalase                                         | Cat    | 24248  | 1,24 | down |
| 5794675 | 7230653 | 1448938 | catalase                                         | Cat    | 24248  | 1,10 | down |
| 5853359 | 7230653 | 1448937 | catalase                                         | Cat    | 24248  | 1,28 | up   |
| 5928226 | 7230653 | 1448939 | catalase                                         | Cat    | 24248  | 1,18 | up   |
| 5966569 | 7230653 | 1448945 | catalase                                         | Cat    | 24248  | 1,13 | up   |
| 5981564 | 7230653 | 1448946 | catalase                                         | Cat    | 24248  | 1,04 | up   |
| 5997765 | 7230653 | 1448949 | catalase                                         | Cat    | 24248  | 1,30 | down |
| 5998871 | 7230653 | 1448948 | catalase                                         | Cat    | 24248  | 1,02 | up   |
| 6047618 | 7230653 | 1448936 | catalase                                         | Cat    | 24248  | 1,28 | down |
| 6224518 | 7230653 | 1448947 | catalase                                         | Cat    | 24248  | 1,12 | up   |
| 6350848 | 7230653 | 1448942 | catalase                                         | Cat    | 24248  | 1,24 | up   |
| 6498055 | 7230653 | 1448949 | catalase                                         | Cat    | 24248  | 2,16 | down |
| 6561994 | 7230653 | 1448936 | catalase                                         | Cat    | 24248  | 1,29 | down |
| 6620071 | 7230653 | 1448941 | catalase                                         | Cat    | 24248  | 1,24 | up   |
| 6704348 | 7230653 | 1448944 | catalase                                         | Cat    | 24248  | 1,05 | up   |
| 6717472 | 7230653 | 1448943 | catalase                                         | Cat    | 24248  | 1,08 | up   |
| 5634628 | 7129696 | 1200590 | catechol-O-methyltransferase domain containing 1 | Comtd1 | 305685 | 2,29 | up   |
| 5806778 | 7129696 | 1200588 | catechol-O-methyltransferase domain containing 1 | Comtd1 | 305685 | 1,05 | up   |
| 5822460 | 7129696 | 1200587 | catechol-O-methyltransferase domain containing 1 | Comtd1 | 305685 | 1,15 | up   |
| 5958363 | 7129696 | 1200590 | catechol-O-methyltransferase domain containing 1 | Comtd1 | 305685 | 1,41 | up   |
| 6186983 | 7129696 | 1200586 | catechol-O-methyltransferase domain containing 1 | Comtd1 | 305685 | 1,72 | down |
| 6265696 | 7129696 | 1200589 | catechol-O-methyltransferase domain containing 1 | Comtd1 | 305685 | 1,77 | down |

|         |         |         |                                                  |        |        |      |      |
|---------|---------|---------|--------------------------------------------------|--------|--------|------|------|
| 6303094 | 7129696 | 1200588 | catechol-O-methyltransferase domain containing 1 | Comtd1 | 305685 | 1,02 | up   |
| 6633910 | 7129696 | 1200587 | catechol-O-methyltransferase domain containing 1 | Comtd1 | 305685 | 1,33 | down |
| 6741338 | 7129696 | 1200591 | catechol-O-methyltransferase domain containing 1 | Comtd1 | 305685 | 1,76 | down |
| 5821081 | 7104905 | 1140015 | cathepsin E                                      | Ctse   | 25424  | 1,17 | up   |
| 6012977 | 7104905 | 1140009 | cathepsin E                                      | Ctse   | 25424  | 1,22 | down |
| 6085054 | 7104905 | 1140012 | cathepsin E                                      | Ctse   | 25424  | 1,14 | up   |
| 6087581 | 7104905 | 1140018 | cathepsin E                                      | Ctse   | 25424  | 1,13 | up   |
| 6239378 | 7104905 | 1140009 | cathepsin E                                      | Ctse   | 25424  | 1,06 | up   |
| 6263554 | 7104905 | 1140013 | cathepsin E                                      | Ctse   | 25424  | 1,56 | up   |
| 6285732 | 7104905 | 1140012 | cathepsin E                                      | Ctse   | 25424  | 1,09 | up   |
| 6407840 | 7104905 | 1140017 | cathepsin E                                      | Ctse   | 25424  | 1,06 | down |
| 6571568 | 7104905 | 1140010 | cathepsin E                                      | Ctse   | 25424  | 1,07 | up   |
| 6637933 | 7104905 | 1140011 | cathepsin E                                      | Ctse   | 25424  | 2,09 | down |
| 6650857 | 7104905 | 1140016 | cathepsin E                                      | Ctse   | 25424  | 1,06 | up   |
| 6664072 | 7104905 | 1140014 | cathepsin E                                      | Ctse   | 25424  | 1,34 | down |
| 5877511 | 7240245 | 1474461 | CBF1 interacting corepressor                     | Cir    | 362149 | 1,40 | down |
| 6142570 | 7240245 | 1474460 | CBF1 interacting corepressor                     | Cir    | 362149 | 1,29 | up   |
| 6187891 | 7240245 | 1474460 | CBF1 interacting corepressor                     | Cir    | 362149 | 1,23 | up   |
| 6317460 | 7240245 | 1474463 | CBF1 interacting corepressor                     | Cir    | 362149 | 1,29 | up   |
| 6403120 | 7240245 | 1474465 | CBF1 interacting corepressor                     | Cir    | 362149 | 2,11 | down |
| 6416661 | 7240245 | 1474467 | CBF1 interacting corepressor                     | Cir    | 362149 | 1,70 | up   |
| 6567522 | 7240245 | 1474461 | CBF1 interacting corepressor                     | Cir    | 362149 | 1,06 | up   |
| 6613856 | 7240245 | 1474468 | CBF1 interacting corepressor                     | Cir    | 362149 | 1,76 | up   |
| 6616411 | 7240245 | 1474469 | CBF1 interacting corepressor                     | Cir    | 362149 | 1,60 | down |
| 6644912 | 7240245 | 1474461 | CBF1 interacting corepressor                     | Cir    | 362149 | 1,11 | down |
| 6648375 | 7240245 | 1474462 | CBF1 interacting corepressor                     | Cir    | 362149 | 1,00 | up   |
| 6652650 | 7240245 | 1474464 | CBF1 interacting corepressor                     | Cir    | 362149 | 1,19 | up   |
| 6672323 | 7240245 | 1474461 | CBF1 interacting corepressor                     | Cir    | 362149 | 1,10 | down |
| 6702791 | 7240245 | 1474466 | CBF1 interacting corepressor                     | Cir    | 362149 | 1,11 | down |
| 5754940 | 7235544 | 1462205 | CCAAT/enhancer binding protein (C/EBP), beta     | Cebpβ  | 24253  | 1,42 | up   |
| 5879125 | 7235544 | 1462205 | CCAAT/enhancer binding protein (C/EBP), beta     | Cebpβ  | 24253  | 1,06 | up   |
| 5963859 | 7235544 | 1462205 | CCAAT/enhancer binding protein (C/EBP), beta     | Cebpβ  | 24253  | 2,60 | down |
| 6335379 | 7235544 | 1462205 | CCAAT/enhancer binding protein (C/EBP), beta     | Cebpβ  | 24253  | 2,74 | down |
| 6397806 | 7235544 | 1462206 | CCAAT/enhancer binding protein (C/EBP), beta     | Cebpβ  | 24253  | 1,12 | up   |
| 6417368 | 7235544 | 1462206 | CCAAT/enhancer binding protein (C/EBP), beta     | Cebpβ  | 24253  | 1,21 | up   |
| 6466575 | 7235544 | 1462205 | CCAAT/enhancer binding protein (C/EBP), beta     | Cebpβ  | 24253  | 1,27 | down |
| 6669084 | 7235544 | 1462205 | CCAAT/enhancer binding protein (C/EBP), beta     | Cebpβ  | 24253  | 1,37 | up   |
| 5662400 | 7076972 | 1073181 | CCR4-NOT transcription complex, subunit 6        | Cnot6  | 287249 | 1,22 | down |
| 5755429 | 7076972 | 1073171 | CCR4-NOT transcription complex, subunit 6        | Cnot6  | 287249 | 1,51 | up   |
| 5873961 | 7076972 | 1073175 | CCR4-NOT transcription complex, subunit 6        | Cnot6  | 287249 | 1,24 | up   |
| 5900925 | 7076972 | 1073182 | CCR4-NOT transcription complex, subunit 6        | Cnot6  | 287249 | 1,19 | down |
| 5973822 | 7076972 | 1073183 | CCR4-NOT transcription complex, subunit 6        | Cnot6  | 287249 | 1,33 | up   |
| 6030450 | 7076972 | 1073180 | CCR4-NOT transcription complex, subunit 6        | Cnot6  | 287249 | 1,23 | up   |
| 6172618 | 7076972 | 1073175 | CCR4-NOT transcription complex, subunit 6        | Cnot6  | 287249 | 1,33 | down |
| 6243215 | 7076972 | 1073173 | CCR4-NOT transcription complex, subunit 6        | Cnot6  | 287249 | 1,07 | up   |
| 6300508 | 7076972 | 1073178 | CCR4-NOT transcription complex, subunit 6        | Cnot6  | 287249 | 1,16 | down |
| 6340054 | 7076972 | 1073182 | CCR4-NOT transcription complex, subunit 6        | Cnot6  | 287249 | 1,10 | up   |
| 6348191 | 7076972 | 1073176 | CCR4-NOT transcription complex, subunit 6        | Cnot6  | 287249 | 1,27 | down |
| 6567972 | 7076972 | 1073172 | CCR4-NOT transcription complex, subunit 6        | Cnot6  | 287249 | 1,47 | down |
| 6624145 | 7076972 | 1073177 | CCR4-NOT transcription complex, subunit 6        | Cnot6  | 287249 | 2,20 | up   |
| 6690495 | 7076972 | 1073174 | CCR4-NOT transcription complex, subunit 6        | Cnot6  | 287249 | 1,06 | up   |
| 6730612 | 7076972 | 1073184 | CCR4-NOT transcription complex, subunit 6        | Cnot6  | 287249 | 1,14 | down |
| 5677022 | 7146000 | 1240663 | CCR4-NOT transcription complex, subunit 7        | Cnot7  | 306492 | 1,08 | up   |
| 5685239 | 7146000 | 1240660 | CCR4-NOT transcription complex, subunit 7        | Cnot7  | 306492 | 1,05 | up   |
| 5809758 | 7146000 | 1240662 | CCR4-NOT transcription complex, subunit 7        | Cnot7  | 306492 | 1,21 | up   |
| 5864464 | 7146000 | 1240659 | CCR4-NOT transcription complex, subunit 7        | Cnot7  | 306492 | 1,03 | up   |

|         |         |         |                                                  |        |        |      |      |
|---------|---------|---------|--------------------------------------------------|--------|--------|------|------|
| 6018555 | 7146000 | 1240658 | CCR4-NOT transcription complex, subunit 7        | Cnot7  | 306492 | 1,02 | up   |
| 6061757 | 7146000 | 1240663 | CCR4-NOT transcription complex, subunit 7        | Cnot7  | 306492 | 1,20 | down |
| 6173680 | 7146000 | 1240654 | CCR4-NOT transcription complex, subunit 7        | Cnot7  | 306492 | 1,12 | down |
| 6217748 | 7146000 | 1240657 | CCR4-NOT transcription complex, subunit 7        | Cnot7  | 306492 | 1,10 | down |
| 6638092 | 7146000 | 1240656 | CCR4-NOT transcription complex, subunit 7        | Cnot7  | 306492 | 1,23 | down |
| 5698119 | 7219866 | 1422723 | CD24 molecule                                    | Cd24   | 25145  | 1,02 | up   |
| 5730469 | 7219866 | 1422723 | CD24 molecule                                    | Cd24   | 25145  | 1,00 | down |
| 5821697 | 7219866 | 1422723 | CD24 molecule                                    | Cd24   | 25145  | 1,11 | up   |
| 5926988 | 7219866 | 1422723 | CD24 molecule                                    | Cd24   | 25145  | 2,86 | up   |
| 5977262 | 7219866 | 1422722 | CD24 molecule                                    | Cd24   | 25145  | 2,14 | up   |
| 6049760 | 7219866 | 1422723 | CD24 molecule                                    | Cd24   | 25145  | 1,11 | down |
| 6060582 | 7219866 | 1422723 | CD24 molecule                                    | Cd24   | 25145  | 1,18 | down |
| 6301198 | 7219866 | 1422722 | CD24 molecule                                    | Cd24   | 25145  | 1,75 | up   |
| 6368857 | 7219866 | 1422723 | CD24 molecule                                    | Cd24   | 25145  | 1,53 | up   |
| 6536829 | 7219866 | 1422723 | CD24 molecule                                    | Cd24   | 25145  | 1,14 | up   |
| 6564111 | 7219866 | 1422723 | CD24 molecule                                    | Cd24   | 25145  | 1,55 | down |
| 5619229 | 7269641 | 1546248 | CD27 molecule                                    | Cd27   | 500318 | 1,04 | up   |
| 5700623 | 7269641 | 1546254 | CD27 molecule                                    | Cd27   | 500318 | 1,02 | up   |
| 5764258 | 7269641 | 1546252 | CD27 molecule                                    | Cd27   | 500318 | 2,36 | up   |
| 5785463 | 7269641 | 1546250 | CD27 molecule                                    | Cd27   | 500318 | 1,67 | down |
| 6129202 | 7269641 | 1546249 | CD27 molecule                                    | Cd27   | 500318 | 1,06 | up   |
| 6346907 | 7269641 | 1546251 | CD27 molecule                                    | Cd27   | 500318 | 1,44 | up   |
| 6360095 | 7269641 | 1546250 | CD27 molecule                                    | Cd27   | 500318 | 1,07 | up   |
| 6704340 | 7269641 | 1546253 | CD27 molecule                                    | Cd27   | 500318 | 1,21 | down |
| 6580811 | 7041061 | 988084  | CD274 molecule                                   | Cd274  | 499342 | 1,21 | up   |
| 5656646 | 7352385 | 1750842 | CD2-associated protein                           | Cd2ap  | 316258 | 1,02 | down |
| 5665451 | 7352385 | 1750846 | CD2-associated protein                           | Cd2ap  | 316258 | 1,19 | up   |
| 5700594 | 7352385 | 1750835 | CD2-associated protein                           | Cd2ap  | 316258 | 1,14 | up   |
| 5762192 | 7352385 | 1750847 | CD2-associated protein                           | Cd2ap  | 316258 | 1,32 | up   |
| 5765192 | 7352385 | 1750838 | CD2-associated protein                           | Cd2ap  | 316258 | 1,12 | up   |
| 5977076 | 7352385 | 1750847 | CD2-associated protein                           | Cd2ap  | 316258 | 1,01 | down |
| 6007297 | 7352385 | 1750844 | CD2-associated protein                           | Cd2ap  | 316258 | 1,22 | down |
| 6155798 | 7352385 | 1750849 | CD2-associated protein                           | Cd2ap  | 316258 | 1,07 | up   |
| 6263845 | 7352385 | 1750848 | CD2-associated protein                           | Cd2ap  | 316258 | 1,11 | down |
| 6297695 | 7352385 | 1750840 | CD2-associated protein                           | Cd2ap  | 316258 | 1,03 | down |
| 6335356 | 7352385 | 1750851 | CD2-associated protein                           | Cd2ap  | 316258 | 1,14 | up   |
| 6345775 | 7352385 | 1750843 | CD2-associated protein                           | Cd2ap  | 316258 | 1,39 | down |
| 6370391 | 7352385 | 1750841 | CD2-associated protein                           | Cd2ap  | 316258 | 1,05 | down |
| 6416491 | 7352385 | 1750845 | CD2-associated protein                           | Cd2ap  | 316258 | 1,54 | up   |
| 6444313 | 7352385 | 1750839 | CD2-associated protein                           | Cd2ap  | 316258 | 1,19 | up   |
| 6493587 | 7352385 | 1750836 | CD2-associated protein                           | Cd2ap  | 316258 | 1,18 | up   |
| 6636214 | 7352385 | 1750837 | CD2-associated protein                           | Cd2ap  | 316258 | 4,21 | down |
| 6657488 | 7352385 | 1750839 | CD2-associated protein                           | Cd2ap  | 316258 | 1,09 | down |
| 6705493 | 7352385 | 1750845 | CD2-associated protein                           | Cd2ap  | 316258 | 2,49 | down |
| 6708867 | 7352385 | 1750850 | CD2-associated protein                           | Cd2ap  | 316258 | 1,76 | down |
| 5867997 | 7073577 | 1064762 | CD300A molecule                                  | Cd300a | 501736 | 1,06 | up   |
| 6177073 | 7073577 | 1064763 | CD300A molecule                                  | Cd300a | 501736 | 1,52 | down |
| 6258784 | 7073577 | 1064760 | CD300A molecule                                  | Cd300a | 501736 | 1,35 | up   |
| 6330738 | 7073577 | 1064764 | CD300A molecule                                  | Cd300a | 501736 | 1,13 | up   |
| 6376585 | 7073577 | 1064759 | CD300A molecule                                  | Cd300a | 501736 | 1,57 | down |
| 6395812 | 7073577 | 1064765 | CD300A molecule                                  | Cd300a | 501736 | 1,15 | down |
| 6535661 | 7073577 | 1064761 | CD300A molecule                                  | Cd300a | 501736 | 2,01 | down |
| 6609725 | 7073577 | 1064762 | CD300A molecule                                  | Cd300a | 501736 | 1,45 | down |
| 5767989 | 7235393 | 1461715 | CD40 molecule, TNF receptor superfamily member 5 | Cd40   | 171369 | 1,11 | up   |
| 5874545 | 7235393 | 1461709 | CD40 molecule, TNF receptor superfamily member 5 | Cd40   | 171369 | 1,50 | up   |
| 5948637 | 7235393 | 1461716 | CD40 molecule, TNF receptor superfamily member 5 | Cd40   | 171369 | 1,32 | up   |

|         |         |         |                                                                           |      |        |      |      |
|---------|---------|---------|---------------------------------------------------------------------------|------|--------|------|------|
| 6041326 | 7235393 | 1461705 | CD40 molecule, TNF receptor superfamily member 5                          | Cd40 | 171369 | 1,84 | down |
| 6071858 | 7235393 | 1461717 | CD40 molecule, TNF receptor superfamily member 5                          | Cd40 | 171369 | 1,16 | down |
| 6074592 | 7235393 | 1461708 | CD40 molecule, TNF receptor superfamily member 5                          | Cd40 | 171369 | 2,20 | up   |
| 6100015 | 7235393 | 1461710 | CD40 molecule, TNF receptor superfamily member 5                          | Cd40 | 171369 | 2,74 | up   |
| 6100046 | 7235393 | 1461719 | CD40 molecule, TNF receptor superfamily member 5                          | Cd40 | 171369 | 1,09 | up   |
| 6623152 | 7235393 | 1461719 | CD40 molecule, TNF receptor superfamily member 5                          | Cd40 | 171369 | 1,11 | down |
| 6715883 | 7235393 | 1461707 | CD40 molecule, TNF receptor superfamily member 5                          | Cd40 | 171369 | 1,45 | up   |
| 5783798 | 7242411 | 1479249 | Cd44 molecule                                                             | Cd44 | 25406  | 2,31 | up   |
| 5825076 | 7242411 | 1479230 | Cd44 molecule                                                             | Cd44 | 25406  | 1,20 | up   |
| 5843073 | 7242411 | 1479235 | Cd44 molecule                                                             | Cd44 | 25406  | 1,33 | down |
| 5870718 | 7242411 | 1479242 | Cd44 molecule                                                             | Cd44 | 25406  | 3,39 | down |
| 5872959 | 7242411 | 1479231 | Cd44 molecule                                                             | Cd44 | 25406  | 2,74 | up   |
| 5890377 | 7242411 | 1479238 | Cd44 molecule                                                             | Cd44 | 25406  | 1,10 | up   |
| 5969176 | 7242411 | 1479241 | Cd44 molecule                                                             | Cd44 | 25406  | 1,71 | down |
| 5994625 | 7242411 | 1479229 | Cd44 molecule                                                             | Cd44 | 25406  | 1,51 | up   |
| 6115320 | 7242411 | 1479243 | Cd44 molecule                                                             | Cd44 | 25406  | 3,67 | down |
| 6244536 | 7242411 | 1479246 | Cd44 molecule                                                             | Cd44 | 25406  | 2,80 | up   |
| 6251718 | 7242411 | 1479239 | Cd44 molecule                                                             | Cd44 | 25406  | 3,55 | down |
| 6293760 | 7242411 | 1479245 | Cd44 molecule                                                             | Cd44 | 25406  | 2,42 | up   |
| 6308129 | 7242411 | 1479244 | Cd44 molecule                                                             | Cd44 | 25406  | 3,17 | down |
| 6338479 | 7242411 | 1479236 | Cd44 molecule                                                             | Cd44 | 25406  | 2,44 | down |
| 6340517 | 7242411 | 1479232 | Cd44 molecule                                                             | Cd44 | 25406  | 1,53 | up   |
| 6434447 | 7242411 | 1479247 | Cd44 molecule                                                             | Cd44 | 25406  | 2,20 | up   |
| 6457865 | 7242411 | 1479241 | Cd44 molecule                                                             | Cd44 | 25406  | 1,09 | down |
| 6489714 | 7242411 | 1479248 | Cd44 molecule                                                             | Cd44 | 25406  | 3,68 | up   |
| 6533970 | 7242411 | 1479240 | Cd44 molecule                                                             | Cd44 | 25406  | 3,71 | down |
| 6569321 | 7242411 | 1479233 | Cd44 molecule                                                             | Cd44 | 25406  | 1,03 | down |
| 6630737 | 7242411 | 1479237 | Cd44 molecule                                                             | Cd44 | 25406  | 1,31 | down |
| 6729789 | 7242411 | 1479234 | Cd44 molecule                                                             | Cd44 | 25406  | 1,43 | up   |
| 5637095 | 7060361 | 1032334 | Cd5 molecule                                                              | Cd5  | 54236  | 2,80 | down |
| 5725436 | 7060361 | 1032338 | Cd5 molecule                                                              | Cd5  | 54236  | 1,10 | up   |
| 5770174 | 7060361 | 1032332 | Cd5 molecule                                                              | Cd5  | 54236  | 1,11 | down |
| 5797097 | 7060361 | 1032328 | Cd5 molecule                                                              | Cd5  | 54236  | 1,11 | up   |
| 5821426 | 7060361 | 1032334 | Cd5 molecule                                                              | Cd5  | 54236  | 1,09 | down |
| 5836629 | 7060361 | 1032334 | Cd5 molecule                                                              | Cd5  | 54236  | 1,05 | down |
| 5888102 | 7060361 | 1032333 | Cd5 molecule                                                              | Cd5  | 54236  | 1,28 | down |
| 5899340 | 7060361 | 1032328 | Cd5 molecule                                                              | Cd5  | 54236  | 1,00 | down |
| 5965590 | 7060361 | 1032330 | Cd5 molecule                                                              | Cd5  | 54236  | 1,01 | down |
| 5985347 | 7060361 | 1032335 | Cd5 molecule                                                              | Cd5  | 54236  | 1,23 | up   |
| 6144401 | 7060361 | 1032329 | Cd5 molecule                                                              | Cd5  | 54236  | 1,07 | up   |
| 6244897 | 7060361 | 1032336 | Cd5 molecule                                                              | Cd5  | 54236  | 1,35 | down |
| 6470562 | 7060361 | 1032334 | Cd5 molecule                                                              | Cd5  | 54236  | 1,14 | down |
| 6493581 | 7060361 | 1032331 | Cd5 molecule                                                              | Cd5  | 54236  | 1,24 | down |
| 6583702 | 7060361 | 1032334 | Cd5 molecule                                                              | Cd5  | 54236  | 1,27 | down |
| 6636626 | 7060361 | 1032337 | Cd5 molecule                                                              | Cd5  | 54236  | 1,56 | up   |
| 5721404 | 7270038 | 1547246 | Cd69 molecule                                                             | Cd69 | 29187  | 3,50 | up   |
| 5928284 | 7270038 | 1547248 | Cd69 molecule                                                             | Cd69 | 29187  | 2,09 | up   |
| 6181648 | 7270038 | 1547245 | Cd69 molecule                                                             | Cd69 | 29187  | 1,96 | down |
| 6182521 | 7270038 | 1547247 | Cd69 molecule                                                             | Cd69 | 29187  | 1,88 | up   |
| 6258061 | 7270038 | 1547249 | Cd69 molecule                                                             | Cd69 | 29187  | 1,80 | up   |
| 6329823 | 7270038 | 1547250 | Cd69 molecule                                                             | Cd69 | 29187  | 3,79 | down |
| 5727419 | 7170979 | 1302160 | Cd74 molecule, major histocompatibility complex, class II invariant chain | Cd74 | 25599  | 1,08 | up   |
| 5954234 | 7170979 | 1302162 | Cd74 molecule, major histocompatibility complex, class II invariant chain | Cd74 | 25599  | 1,20 | up   |
| 5995166 | 7170979 | 1302164 | Cd74 molecule, major histocompatibility complex, class II invariant chain | Cd74 | 25599  | 1,01 | up   |
| 6007764 | 7170979 | 1302167 | Cd74 molecule, major histocompatibility complex, class II invariant chain | Cd74 | 25599  | 3,51 | down |
| 6086666 | 7170979 | 1302165 | Cd74 molecule, major histocompatibility complex, class II invariant chain | Cd74 | 25599  | 1,09 | up   |

|         |         |         |                                                                           |          |        |      |      |
|---------|---------|---------|---------------------------------------------------------------------------|----------|--------|------|------|
| 6183597 | 7170979 | 1302161 | Cd74 molecule, major histocompatibility complex, class II invariant chain | Cd74     | 25599  | 1,22 | down |
| 6255822 | 7170979 | 1302166 | Cd74 molecule, major histocompatibility complex, class II invariant chain | Cd74     | 25599  | 1,43 | up   |
| 6578400 | 7170979 | 1302163 | Cd74 molecule, major histocompatibility complex, class II invariant chain | Cd74     | 25599  | 1,31 | up   |
| 5658912 | 7241972 | 1478252 | Cd82 molecule                                                             | Cd82     | 83628  | 1,08 | up   |
| 5840543 | 7241972 | 1478254 | Cd82 molecule                                                             | Cd82     | 83628  | 1,09 | up   |
| 5941347 | 7241972 | 1478250 | Cd82 molecule                                                             | Cd82     | 83628  | 1,21 | down |
| 5987939 | 7241972 | 1478250 | Cd82 molecule                                                             | Cd82     | 83628  | 1,42 | up   |
| 6031210 | 7241972 | 1478259 | Cd82 molecule                                                             | Cd82     | 83628  | 1,48 | down |
| 6079009 | 7241972 | 1478257 | Cd82 molecule                                                             | Cd82     | 83628  | 1,06 | up   |
| 6305710 | 7241972 | 1478255 | Cd82 molecule                                                             | Cd82     | 83628  | 1,19 | up   |
| 6333416 | 7241972 | 1478251 | Cd82 molecule                                                             | Cd82     | 83628  | 1,11 | up   |
| 6446012 | 7241972 | 1478256 | Cd82 molecule                                                             | Cd82     | 83628  | 1,02 | up   |
| 6474668 | 7241972 | 1478253 | Cd82 molecule                                                             | Cd82     | 83628  | 1,04 | up   |
| 6555737 | 7241972 | 1478250 | Cd82 molecule                                                             | Cd82     | 83628  | 4,59 | down |
| 6569483 | 7241972 | 1478260 | Cd82 molecule                                                             | Cd82     | 83628  | 1,39 | down |
| 6715340 | 7241972 | 1478258 | Cd82 molecule                                                             | Cd82     | 83628  | 1,10 | down |
| 5627673 | 7246271 | 1488549 | CD93 molecule                                                             | Cd93     | 84398  | 1,01 | up   |
| 5708697 | 7246271 | 1488549 | CD93 molecule                                                             | Cd93     | 84398  | 1,65 | down |
| 5711996 | 7246271 | 1488549 | CD93 molecule                                                             | Cd93     | 84398  | 1,05 | up   |
| 5713096 | 7246271 | 1488549 | CD93 molecule                                                             | Cd93     | 84398  | 1,23 | down |
| 5722922 | 7246271 | 1488548 | CD93 molecule                                                             | Cd93     | 84398  | 1,67 | down |
| 5726645 | 7246271 | 1488551 | CD93 molecule                                                             | Cd93     | 84398  | 1,35 | down |
| 5746965 | 7246271 | 1488549 | CD93 molecule                                                             | Cd93     | 84398  | 1,02 | down |
| 5784046 | 7246271 | 1488548 | CD93 molecule                                                             | Cd93     | 84398  | 1,02 | up   |
| 5820050 | 7246271 | 1488551 | CD93 molecule                                                             | Cd93     | 84398  | 1,01 | up   |
| 5847294 | 7246271 | 1488549 | CD93 molecule                                                             | Cd93     | 84398  | 1,01 | up   |
| 5860112 | 7246271 | 1488549 | CD93 molecule                                                             | Cd93     | 84398  | 1,15 | down |
| 5964238 | 7246271 | 1488549 | CD93 molecule                                                             | Cd93     | 84398  | 1,08 | up   |
| 6147084 | 7246271 | 1488550 | CD93 molecule                                                             | Cd93     | 84398  | 1,00 | up   |
| 6220905 | 7246271 | 1488550 | CD93 molecule                                                             | Cd93     | 84398  | 1,06 | down |
| 6226700 | 7246271 | 1488549 | CD93 molecule                                                             | Cd93     | 84398  | 2,00 | down |
| 6414871 | 7246271 | 1488549 | CD93 molecule                                                             | Cd93     | 84398  | 1,37 | down |
| 6417533 | 7246271 | 1488551 | CD93 molecule                                                             | Cd93     | 84398  | 1,08 | down |
| 6418970 | 7246271 | 1488551 | CD93 molecule                                                             | Cd93     | 84398  | 1,08 | down |
| 6586189 | 7246271 | 1488549 | CD93 molecule                                                             | Cd93     | 84398  | 1,06 | up   |
| 6608550 | 7246271 | 1488551 | CD93 molecule                                                             | Cd93     | 84398  | 1,01 | down |
| 5629160 | 7154655 | 1262320 | CDC14 cell division cycle 14 homolog B (S. cerevisiae)                    | Cdc14b   | 361195 | 1,44 | down |
| 5785266 | 7154655 | 1262329 | CDC14 cell division cycle 14 homolog B (S. cerevisiae)                    | Cdc14b   | 361195 | 1,03 | down |
| 5790726 | 7154655 | 1262332 | CDC14 cell division cycle 14 homolog B (S. cerevisiae)                    | Cdc14b   | 361195 | 1,10 | up   |
| 5878563 | 7154655 | 1262340 | CDC14 cell division cycle 14 homolog B (S. cerevisiae)                    | Cdc14b   | 361195 | 1,15 | down |
| 5937801 | 7154655 | 1262341 | CDC14 cell division cycle 14 homolog B (S. cerevisiae)                    | Cdc14b   | 361195 | 1,13 | down |
| 5989006 | 7154655 | 1262318 | CDC14 cell division cycle 14 homolog B (S. cerevisiae)                    | Cdc14b   | 361195 | 1,30 | up   |
| 5992158 | 7154655 | 1262337 | CDC14 cell division cycle 14 homolog B (S. cerevisiae)                    | Cdc14b   | 361195 | 1,13 | up   |
| 6047933 | 7154655 | 1262341 | CDC14 cell division cycle 14 homolog B (S. cerevisiae)                    | Cdc14b   | 361195 | 1,17 | down |
| 6051637 | 7154655 | 1262328 | CDC14 cell division cycle 14 homolog B (S. cerevisiae)                    | Cdc14b   | 361195 | 1,43 | down |
| 6074831 | 7154655 | 1262321 | CDC14 cell division cycle 14 homolog B (S. cerevisiae)                    | Cdc14b   | 361195 | 1,06 | up   |
| 6189491 | 7154655 | 1262330 | CDC14 cell division cycle 14 homolog B (S. cerevisiae)                    | Cdc14b   | 361195 | 1,03 | down |
| 6245678 | 7154655 | 1262341 | CDC14 cell division cycle 14 homolog B (S. cerevisiae)                    | Cdc14b   | 361195 | 1,09 | down |
| 6253860 | 7154655 | 1262331 | CDC14 cell division cycle 14 homolog B (S. cerevisiae)                    | Cdc14b   | 361195 | 1,19 | up   |
| 6269429 | 7154655 | 1262325 | CDC14 cell division cycle 14 homolog B (S. cerevisiae)                    | Cdc14b   | 361195 | 1,40 | down |
| 6294530 | 7154655 | 1262326 | CDC14 cell division cycle 14 homolog B (S. cerevisiae)                    | Cdc14b   | 361195 | 1,24 | down |
| 6397485 | 7154655 | 1262327 | CDC14 cell division cycle 14 homolog B (S. cerevisiae)                    | Cdc14b   | 361195 | 1,15 | down |
| 6660678 | 7154655 | 1262322 | CDC14 cell division cycle 14 homolog B (S. cerevisiae)                    | Cdc14b   | 361195 | 1,16 | down |
| 6733220 | 7154655 | 1262342 | CDC14 cell division cycle 14 homolog B (S. cerevisiae)                    | Cdc14b   | 361195 | 1,08 | down |
| 5740961 | 7318631 | 1669027 | CDC42 effector protein (Rho GTPase binding) 1                             | Cdc42ep1 | 315121 | 1,02 | down |
| 5752203 | 7318631 | 1669027 | CDC42 effector protein (Rho GTPase binding) 1                             | Cdc42ep1 | 315121 | 2,20 | down |

|         |         |         |                                                     |          |        |      |      |
|---------|---------|---------|-----------------------------------------------------|----------|--------|------|------|
| 6109413 | 7318631 | 1669026 | CDC42 effector protein (Rho GTPase binding) 1       | Cdc42ep1 | 315121 | 1,10 | up   |
| 6228304 | 7318631 | 1669026 | CDC42 effector protein (Rho GTPase binding) 1       | Cdc42ep1 | 315121 | 1,07 | up   |
| 6278824 | 7318631 | 1669027 | CDC42 effector protein (Rho GTPase binding) 1       | Cdc42ep1 | 315121 | 1,16 | down |
| 6293219 | 7318631 | 1669027 | CDC42 effector protein (Rho GTPase binding) 1       | Cdc42ep1 | 315121 | 1,20 | up   |
| 6393553 | 7318631 | 1669026 | CDC42 effector protein (Rho GTPase binding) 1       | Cdc42ep1 | 315121 | 1,50 | up   |
| 6595007 | 7318631 | 1669027 | CDC42 effector protein (Rho GTPase binding) 1       | Cdc42ep1 | 315121 | 1,11 | up   |
| 6732209 | 7318631 | 1669026 | CDC42 effector protein (Rho GTPase binding) 1       | Cdc42ep1 | 315121 | 1,01 | up   |
| 5699487 | 7088432 | 1099419 | Cdc42 GTPase-activating protein                     | Cdgap    | 288093 | 1,24 | up   |
| 5924849 | 7088432 | 1099421 | Cdc42 GTPase-activating protein                     | Cdgap    | 288093 | 1,05 | up   |
| 5930998 | 7088432 | 1099416 | Cdc42 GTPase-activating protein                     | Cdgap    | 288093 | 1,21 | up   |
| 6072112 | 7088432 | 1099411 | Cdc42 GTPase-activating protein                     | Cdgap    | 288093 | 1,09 | up   |
| 6220873 | 7088432 | 1099393 | Cdc42 GTPase-activating protein                     | Cdgap    | 288093 | 1,52 | down |
| 6348291 | 7088432 | 1099421 | Cdc42 GTPase-activating protein                     | Cdgap    | 288093 | 1,12 | up   |
| 6364348 | 7088432 | 1099410 | Cdc42 GTPase-activating protein                     | Cdgap    | 288093 | 1,31 | up   |
| 6387679 | 7088432 | 1099409 | Cdc42 GTPase-activating protein                     | Cdgap    | 288093 | 1,11 | down |
| 6453569 | 7088432 | 1099418 | Cdc42 GTPase-activating protein                     | Cdgap    | 288093 | 1,02 | up   |
| 6501366 | 7088432 | 1099412 | Cdc42 GTPase-activating protein                     | Cdgap    | 288093 | 1,06 | up   |
| 6555271 | 7088432 | 1099408 | Cdc42 GTPase-activating protein                     | Cdgap    | 288093 | 1,24 | down |
| 6579125 | 7088432 | 1099413 | Cdc42 GTPase-activating protein                     | Cdgap    | 288093 | 1,08 | down |
| 6610556 | 7088432 | 1099421 | Cdc42 GTPase-activating protein                     | Cdgap    | 288093 | 2,64 | down |
| 6713367 | 7088432 | 1099420 | Cdc42 GTPase-activating protein                     | Cdgap    | 288093 | 1,55 | up   |
| 5664555 | 7038971 | 982983  | CDK2-associated protein 2                           | Cdk2ap2  | 688405 | 1,21 | up   |
| 5797860 | 7038971 | 982984  | CDK2-associated protein 2                           | Cdk2ap2  | 688405 | 1,02 | up   |
| 6009763 | 7038971 | 982983  | CDK2-associated protein 2                           | Cdk2ap2  | 688405 | 1,08 | up   |
| 6161655 | 7038971 | 982983  | CDK2-associated protein 2                           | Cdk2ap2  | 688405 | 1,44 | down |
| 6205198 | 7038971 | 982983  | CDK2-associated protein 2                           | Cdk2ap2  | 688405 | 1,25 | up   |
| 6432674 | 7038971 | 982985  | CDK2-associated protein 2                           | Cdk2ap2  | 688405 | 1,11 | up   |
| 6495626 | 7038971 | 982985  | CDK2-associated protein 2                           | Cdk2ap2  | 688405 | 1,09 | down |
| 6642150 | 7038971 | 982985  | CDK2-associated protein 2                           | Cdk2ap2  | 688405 | 1,10 | up   |
| 5624464 | 7167876 | 1294075 | Cdk5 and Abl enzyme substrate 1                     | Cables1  | 307585 | 2,35 | down |
| 5682659 | 7167876 | 1294073 | Cdk5 and Abl enzyme substrate 1                     | Cables1  | 307585 | 1,72 | down |
| 5723426 | 7167876 | 1294049 | Cdk5 and Abl enzyme substrate 1                     | Cables1  | 307585 | 1,18 | down |
| 5759824 | 7167876 | 1294063 | Cdk5 and Abl enzyme substrate 1                     | Cables1  | 307585 | 1,37 | down |
| 6097374 | 7167876 | 1294049 | Cdk5 and Abl enzyme substrate 1                     | Cables1  | 307585 | 1,23 | down |
| 6251254 | 7167876 | 1294049 | Cdk5 and Abl enzyme substrate 1                     | Cables1  | 307585 | 1,17 | up   |
| 6303077 | 7167876 | 1294083 | Cdk5 and Abl enzyme substrate 1                     | Cables1  | 307585 | 1,04 | down |
| 6378132 | 7167876 | 1294083 | Cdk5 and Abl enzyme substrate 1                     | Cables1  | 307585 | 1,29 | up   |
| 6418022 | 7167876 | 1294060 | Cdk5 and Abl enzyme substrate 1                     | Cables1  | 307585 | 1,23 | down |
| 6534483 | 7167876 | 1294081 | Cdk5 and Abl enzyme substrate 1                     | Cables1  | 307585 | 1,07 | up   |
| 6562950 | 7167876 | 1294073 | Cdk5 and Abl enzyme substrate 1                     | Cables1  | 307585 | 1,00 | down |
| 6664734 | 7167876 | 1294074 | Cdk5 and Abl enzyme substrate 1                     | Cables1  | 307585 | 1,16 | down |
| 6712378 | 7167876 | 1294082 | Cdk5 and Abl enzyme substrate 1                     | Cables1  | 307585 | 1,01 | up   |
| 5708966 | 7157341 | 1269135 | CDK5 regulatory subunit associated protein 1-like 1 | Cdkal1   | 361243 | 1,06 | down |
| 6143745 | 7157341 | 1269134 | CDK5 regulatory subunit associated protein 1-like 1 | Cdkal1   | 361243 | 1,48 | up   |
| 6225643 | 7157341 | 1269147 | CDK5 regulatory subunit associated protein 1-like 1 | Cdkal1   | 361243 | 1,80 | down |
| 6384196 | 7157341 | 1269149 | CDK5 regulatory subunit associated protein 1-like 1 | Cdkal1   | 361243 | 1,01 | up   |
| 6478402 | 7157341 | 1269137 | CDK5 regulatory subunit associated protein 1-like 1 | Cdkal1   | 361243 | 1,38 | up   |
| 6725636 | 7157341 | 1269136 | CDK5 regulatory subunit associated protein 1-like 1 | Cdkal1   | 361243 | 1,56 | up   |
| 5757894 | 7145493 | 1239529 | CDKN2A interacting protein                          | Cdkn2aip | 306455 | 1,67 | up   |
| 5987165 | 7145493 | 1239531 | CDKN2A interacting protein                          | Cdkn2aip | 306455 | 2,58 | down |
| 6080205 | 7145493 | 1239532 | CDKN2A interacting protein                          | Cdkn2aip | 306455 | 1,37 | up   |
| 6197244 | 7145493 | 1239534 | CDKN2A interacting protein                          | Cdkn2aip | 306455 | 1,20 | down |
| 6209041 | 7145493 | 1239530 | CDKN2A interacting protein                          | Cdkn2aip | 306455 | 1,16 | down |
| 6296661 | 7145493 | 1239531 | CDKN2A interacting protein                          | Cdkn2aip | 306455 | 1,44 | up   |
| 6328736 | 7145493 | 1239532 | CDKN2A interacting protein                          | Cdkn2aip | 306455 | 1,34 | up   |
| 6334712 | 7145493 | 1239532 | CDKN2A interacting protein                          | Cdkn2aip | 306455 | 1,07 | up   |

|         |         |         |                            |          |        |      |      |
|---------|---------|---------|----------------------------|----------|--------|------|------|
| 6510093 | 7145493 | 1239532 | CDKN2A interacting protein | Cdkn2aip | 306455 | 1,03 | down |
| 6710495 | 7145493 | 1239533 | CDKN2A interacting protein | Cdkn2aip | 306455 | 1,28 | down |
| 5799461 | 7334627 | 1706474 | Cdon homolog (mouse)       | Cdon     | 50938  | 1,01 | up   |
| 5818238 | 7334627 | 1706480 | Cdon homolog (mouse)       | Cdon     | 50938  | 1,06 | down |
| 5828186 | 7334627 | 1706481 | Cdon homolog (mouse)       | Cdon     | 50938  | 1,44 | up   |
| 5918588 | 7334627 | 1706483 | Cdon homolog (mouse)       | Cdon     | 50938  | 1,08 | up   |
| 5921214 | 7334627 | 1706482 | Cdon homolog (mouse)       | Cdon     | 50938  | 1,11 | down |
| 5927598 | 7334627 | 1706470 | Cdon homolog (mouse)       | Cdon     | 50938  | 1,09 | down |
| 5931945 | 7334627 | 1706475 | Cdon homolog (mouse)       | Cdon     | 50938  | 1,25 | up   |
| 5940173 | 7334627 | 1706479 | Cdon homolog (mouse)       | Cdon     | 50938  | 1,15 | up   |
| 5943192 | 7334627 | 1706487 | Cdon homolog (mouse)       | Cdon     | 50938  | 1,10 | down |
| 5958876 | 7334627 | 1706470 | Cdon homolog (mouse)       | Cdon     | 50938  | 1,07 | down |
| 6101718 | 7334627 | 1706479 | Cdon homolog (mouse)       | Cdon     | 50938  | 1,05 | down |
| 6119454 | 7334627 | 1706484 | Cdon homolog (mouse)       | Cdon     | 50938  | 1,14 | up   |
| 6145262 | 7334627 | 1706488 | Cdon homolog (mouse)       | Cdon     | 50938  | 1,19 | up   |
| 6202561 | 7334627 | 1706473 | Cdon homolog (mouse)       | Cdon     | 50938  | 1,14 | down |
| 6261165 | 7334627 | 1706472 | Cdon homolog (mouse)       | Cdon     | 50938  | 1,32 | up   |
| 6273760 | 7334627 | 1706486 | Cdon homolog (mouse)       | Cdon     | 50938  | 1,42 | down |
| 6290092 | 7334627 | 1706471 | Cdon homolog (mouse)       | Cdon     | 50938  | 1,04 | down |
| 6350066 | 7334627 | 1706476 | Cdon homolog (mouse)       | Cdon     | 50938  | 1,08 | down |
| 6369540 | 7334627 | 1706478 | Cdon homolog (mouse)       | Cdon     | 50938  | 1,23 | down |
| 6470916 | 7334627 | 1706475 | Cdon homolog (mouse)       | Cdon     | 50938  | 1,17 | up   |
| 6474205 | 7334627 | 1706475 | Cdon homolog (mouse)       | Cdon     | 50938  | 1,14 | up   |
| 6505828 | 7334627 | 1706469 | Cdon homolog (mouse)       | Cdon     | 50938  | 1,17 | down |
| 6571811 | 7334627 | 1706476 | Cdon homolog (mouse)       | Cdon     | 50938  | 1,62 | up   |
| 6655960 | 7334627 | 1706475 | Cdon homolog (mouse)       | Cdon     | 50938  | 1,03 | down |
| 6660622 | 7334627 | 1706477 | Cdon homolog (mouse)       | Cdon     | 50938  | 1,03 | down |
| 6682285 | 7334627 | 1706484 | Cdon homolog (mouse)       | Cdon     | 50938  | 1,46 | up   |
| 6684439 | 7334627 | 1706485 | Cdon homolog (mouse)       | Cdon     | 50938  | 2,07 | down |
| 5961626 | 7090278 | 1104099 | cell adhesion molecule 2   | Cadm2    | 360687 | 1,14 | up   |
| 5976364 | 7090278 | 1104091 | cell adhesion molecule 2   | Cadm2    | 360687 | 1,03 | up   |
| 6317547 | 7090278 | 1104103 | cell adhesion molecule 2   | Cadm2    | 360687 | 1,72 | up   |
| 6440613 | 7090278 | 1104096 | cell adhesion molecule 2   | Cadm2    | 360687 | 1,11 | up   |
| 6633088 | 7090278 | 1104093 | cell adhesion molecule 2   | Cadm2    | 360687 | 1,02 | up   |
| 6663485 | 7090278 | 1104076 | cell adhesion molecule 2   | Cadm2    | 360687 | 1,18 | up   |
| 6677384 | 7090278 | 1104075 | cell adhesion molecule 2   | Cadm2    | 360687 | 1,11 | up   |
| 6696949 | 7090278 | 1104089 | cell adhesion molecule 2   | Cadm2    | 360687 | 1,19 | up   |
| 5658117 | 7337902 | 1714546 | cell cycle progression 1   | Ccp1     | 363098 | 1,22 | down |
| 5661789 | 7337902 | 1714538 | cell cycle progression 1   | Ccp1     | 363098 | 1,14 | up   |
| 5947683 | 7337902 | 1714548 | cell cycle progression 1   | Ccp1     | 363098 | 1,05 | down |
| 5986432 | 7337902 | 1714540 | cell cycle progression 1   | Ccp1     | 363098 | 1,04 | up   |
| 6005018 | 7337902 | 1714547 | cell cycle progression 1   | Ccp1     | 363098 | 1,06 | up   |
| 6026388 | 7337902 | 1714541 | cell cycle progression 1   | Ccp1     | 363098 | 1,25 | down |
| 6257841 | 7337902 | 1714544 | cell cycle progression 1   | Ccp1     | 363098 | 1,03 | up   |
| 6293362 | 7337902 | 1714545 | cell cycle progression 1   | Ccp1     | 363098 | 1,02 | up   |
| 6315840 | 7337902 | 1714548 | cell cycle progression 1   | Ccp1     | 363098 | 1,37 | up   |
| 6423415 | 7337902 | 1714547 | cell cycle progression 1   | Ccp1     | 363098 | 1,46 | down |
| 6540962 | 7337902 | 1714542 | cell cycle progression 1   | Ccp1     | 363098 | 1,26 | down |
| 5690045 | 7161300 | 1278552 | cell cycle related kinase  | Ccrk     | 364666 | 1,18 | down |
| 5696190 | 7161300 | 1278554 | cell cycle related kinase  | Ccrk     | 364666 | 1,51 | down |
| 5754374 | 7161300 | 1278551 | cell cycle related kinase  | Ccrk     | 364666 | 1,02 | down |
| 5940935 | 7161300 | 1278552 | cell cycle related kinase  | Ccrk     | 364666 | 1,12 | up   |
| 5974002 | 7161300 | 1278551 | cell cycle related kinase  | Ccrk     | 364666 | 1,35 | down |
| 6004574 | 7161300 | 1278551 | cell cycle related kinase  | Ccrk     | 364666 | 1,44 | up   |
| 6066184 | 7161300 | 1278553 | cell cycle related kinase  | Ccrk     | 364666 | 1,18 | up   |
| 6165225 | 7161300 | 1278550 | cell cycle related kinase  | Ccrk     | 364666 | 1,11 | down |

|         |         |         |                                            |       |        |      |      |
|---------|---------|---------|--------------------------------------------|-------|--------|------|------|
| 6192511 | 7161300 | 1278554 | cell cycle related kinase                  | Ccrk  | 364666 | 2,79 | up   |
| 6381565 | 7161300 | 1278550 | cell cycle related kinase                  | Ccrk  | 364666 | 1,24 | up   |
| 6530371 | 7161300 | 1278549 | cell cycle related kinase                  | Ccrk  | 364666 | 1,04 | up   |
| 6564446 | 7161300 | 1278549 | cell cycle related kinase                  | Ccrk  | 364666 | 1,01 | up   |
| 5626572 | 7268451 | 1543629 | cell death-inducing DFFA-like effector c   | Cidec | 500292 | 1,26 | down |
| 5673259 | 7268451 | 1543626 | cell death-inducing DFFA-like effector c   | Cidec | 500292 | 1,92 | down |
| 5699919 | 7268451 | 1543631 | cell death-inducing DFFA-like effector c   | Cidec | 500292 | 2,86 | down |
| 5741754 | 7268451 | 1543627 | cell death-inducing DFFA-like effector c   | Cidec | 500292 | 1,15 | up   |
| 5816957 | 7268451 | 1543630 | cell death-inducing DFFA-like effector c   | Cidec | 500292 | 1,02 | up   |
| 5830448 | 7268451 | 1543626 | cell death-inducing DFFA-like effector c   | Cidec | 500292 | 1,54 | down |
| 6134552 | 7268451 | 1543631 | cell death-inducing DFFA-like effector c   | Cidec | 500292 | 4,47 | down |
| 6269561 | 7268451 | 1543628 | cell death-inducing DFFA-like effector c   | Cidec | 500292 | 1,91 | up   |
| 6441468 | 7268451 | 1543626 | cell death-inducing DFFA-like effector c   | Cidec | 500292 | 1,28 | up   |
| 6473618 | 7268451 | 1543626 | cell death-inducing DFFA-like effector c   | Cidec | 500292 | 1,58 | up   |
| 5655285 | 7218195 | 1418559 | cell division cycle 2, G1 to S and G2 to M | Cdc2  | 54237  | 1,14 | up   |
| 5667422 | 7218195 | 1418556 | cell division cycle 2, G1 to S and G2 to M | Cdc2  | 54237  | 1,31 | down |
| 5992008 | 7218195 | 1418558 | cell division cycle 2, G1 to S and G2 to M | Cdc2  | 54237  | 1,50 | down |
| 6052985 | 7218195 | 1418555 | cell division cycle 2, G1 to S and G2 to M | Cdc2  | 54237  | 2,00 | down |
| 6299939 | 7218195 | 1418560 | cell division cycle 2, G1 to S and G2 to M | Cdc2  | 54237  | 1,00 | down |
| 6319563 | 7218195 | 1418554 | cell division cycle 2, G1 to S and G2 to M | Cdc2  | 54237  | 1,49 | up   |
| 6360742 | 7218195 | 1418552 | cell division cycle 2, G1 to S and G2 to M | Cdc2  | 54237  | 1,08 | up   |
| 6548042 | 7218195 | 1418555 | cell division cycle 2, G1 to S and G2 to M | Cdc2  | 54237  | 1,07 | down |
| 6692009 | 7218195 | 1418553 | cell division cycle 2, G1 to S and G2 to M | Cdc2  | 54237  | 1,45 | up   |
| 6736323 | 7218195 | 1418557 | cell division cycle 2, G1 to S and G2 to M | Cdc2  | 54237  | 1,37 | down |
| 5620640 | 7184981 | 1337843 | centromere protein T                       | Cenpt | 307805 | 2,42 | down |
| 5768234 | 7184981 | 1337845 | centromere protein T                       | Cenpt | 307805 | 1,54 | down |
| 5801704 | 7184981 | 1337841 | centromere protein T                       | Cenpt | 307805 | 1,44 | down |
| 5802576 | 7184981 | 1337845 | centromere protein T                       | Cenpt | 307805 | 1,10 | up   |
| 5810198 | 7184981 | 1337838 | centromere protein T                       | Cenpt | 307805 | 1,17 | down |
| 5892128 | 7184981 | 1337843 | centromere protein T                       | Cenpt | 307805 | 1,46 | up   |
| 5896001 | 7184981 | 1337849 | centromere protein T                       | Cenpt | 307805 | 1,11 | up   |
| 5915320 | 7184981 | 1337854 | centromere protein T                       | Cenpt | 307805 | 1,23 | up   |
| 5944214 | 7184981 | 1337847 | centromere protein T                       | Cenpt | 307805 | 2,28 | up   |
| 5965847 | 7184981 | 1337846 | centromere protein T                       | Cenpt | 307805 | 1,15 | down |
| 6288916 | 7184981 | 1337850 | centromere protein T                       | Cenpt | 307805 | 1,16 | up   |
| 6371742 | 7184981 | 1337842 | centromere protein T                       | Cenpt | 307805 | 1,03 | down |
| 6476867 | 7184981 | 1337854 | centromere protein T                       | Cenpt | 307805 | 1,06 | up   |
| 6545005 | 7184981 | 1337847 | centromere protein T                       | Cenpt | 307805 | 1,02 | up   |
| 6575560 | 7184981 | 1337836 | centromere protein T                       | Cenpt | 307805 | 1,36 | down |
| 6596089 | 7184981 | 1337848 | centromere protein T                       | Cenpt | 307805 | 1,34 | down |
| 6733062 | 7184981 | 1337835 | centromere protein T                       | Cenpt | 307805 | 1,58 | down |
| 6739331 | 7184981 | 1337842 | centromere protein T                       | Cenpt | 307805 | 1,35 | up   |
| 5656660 | 7060790 | 1033227 | centrosomal protein 78kDa                  | Cep78 | 60347  | 1,03 | up   |
| 5764554 | 7060790 | 1033219 | centrosomal protein 78kDa                  | Cep78 | 60347  | 1,03 | up   |
| 5841055 | 7060790 | 1033221 | centrosomal protein 78kDa                  | Cep78 | 60347  | 1,22 | down |
| 5880042 | 7060790 | 1033221 | centrosomal protein 78kDa                  | Cep78 | 60347  | 1,33 | down |
| 5936638 | 7060790 | 1033216 | centrosomal protein 78kDa                  | Cep78 | 60347  | 1,57 | up   |
| 6038064 | 7060790 | 1033224 | centrosomal protein 78kDa                  | Cep78 | 60347  | 1,64 | up   |
| 6059790 | 7060790 | 1033218 | centrosomal protein 78kDa                  | Cep78 | 60347  | 1,57 | up   |
| 6150412 | 7060790 | 1033215 | centrosomal protein 78kDa                  | Cep78 | 60347  | 1,17 | up   |
| 6194845 | 7060790 | 1033221 | centrosomal protein 78kDa                  | Cep78 | 60347  | 1,00 | up   |
| 6352311 | 7060790 | 1033217 | centrosomal protein 78kDa                  | Cep78 | 60347  | 1,28 | down |
| 6408023 | 7060790 | 1033220 | centrosomal protein 78kDa                  | Cep78 | 60347  | 1,02 | down |
| 6442717 | 7060790 | 1033223 | centrosomal protein 78kDa                  | Cep78 | 60347  | 2,02 | up   |
| 6481691 | 7060790 | 1033225 | centrosomal protein 78kDa                  | Cep78 | 60347  | 1,18 | down |
| 6602107 | 7060790 | 1033222 | centrosomal protein 78kDa                  | Cep78 | 60347  | 1,38 | up   |



|         |         |         |                                                            |       |        |      |      |
|---------|---------|---------|------------------------------------------------------------|-------|--------|------|------|
| 6656192 | 7060790 | 1033219 | centrosomal protein 78kDa                                  | Cep78 | 60347  | 1,16 | up   |
| 6667669 | 7060790 | 1033214 | centrosomal protein 78kDa                                  | Cep78 | 60347  | 1,36 | up   |
| 6707977 | 7060790 | 1033226 | centrosomal protein 78kDa                                  | Cep78 | 60347  | 1,46 | down |
| 5645095 | 7192307 | 1355994 | ceruloplasmin                                              | Cp    | 24268  | 1,62 | up   |
| 5665881 | 7192307 | 1355989 | ceruloplasmin                                              | Cp    | 24268  | 1,41 | up   |
| 5769395 | 7192307 | 1355987 | ceruloplasmin                                              | Cp    | 24268  | 4,00 | down |
| 5846700 | 7192307 | 1355988 | ceruloplasmin                                              | Cp    | 24268  | 1,79 | down |
| 5935112 | 7192307 | 1355992 | ceruloplasmin                                              | Cp    | 24268  | 1,01 | down |
| 6003440 | 7192307 | 1356002 | ceruloplasmin                                              | Cp    | 24268  | 1,37 | down |
| 6020185 | 7192307 | 1355987 | ceruloplasmin                                              | Cp    | 24268  | 1,86 | down |
| 6092076 | 7192307 | 1355991 | ceruloplasmin                                              | Cp    | 24268  | 1,66 | down |
| 6139601 | 7192307 | 1355986 | ceruloplasmin                                              | Cp    | 24268  | 1,57 | up   |
| 6142453 | 7192307 | 1355994 | ceruloplasmin                                              | Cp    | 24268  | 1,53 | up   |
| 6172181 | 7192307 | 1356001 | ceruloplasmin                                              | Cp    | 24268  | 2,36 | up   |
| 6183835 | 7192307 | 1355988 | ceruloplasmin                                              | Cp    | 24268  | 1,45 | up   |
| 6185896 | 7192307 | 1355999 | ceruloplasmin                                              | Cp    | 24268  | 1,80 | down |
| 6304110 | 7192307 | 1355984 | ceruloplasmin                                              | Cp    | 24268  | 4,26 | down |
| 6364812 | 7192307 | 1355997 | ceruloplasmin                                              | Cp    | 24268  | 1,74 | down |
| 6396813 | 7192307 | 1355990 | ceruloplasmin                                              | Cp    | 24268  | 1,68 | up   |
| 6449929 | 7192307 | 1356000 | ceruloplasmin                                              | Cp    | 24268  | 1,57 | up   |
| 6450013 | 7192307 | 1355993 | ceruloplasmin                                              | Cp    | 24268  | 2,08 | down |
| 6594105 | 7192307 | 1355996 | ceruloplasmin                                              | Cp    | 24268  | 1,22 | down |
| 6687074 | 7192307 | 1355998 | ceruloplasmin                                              | Cp    | 24268  | 1,02 | up   |
| 6706339 | 7192307 | 1355995 | ceruloplasmin                                              | Cp    | 24268  | 1,53 | up   |
| 6731921 | 7192307 | 1355985 | ceruloplasmin                                              | Cp    | 24268  | 1,36 | down |
| 5624532 | 7114652 | 1163897 | chaperone, ABC1 activity of bc1 complex homolog (S. pombe) | Cabc1 | 360887 | 1,11 | down |
| 5682179 | 7114652 | 1163891 | chaperone, ABC1 activity of bc1 complex homolog (S. pombe) | Cabc1 | 360887 | 1,34 | down |
| 5694510 | 7114652 | 1163887 | chaperone, ABC1 activity of bc1 complex homolog (S. pombe) | Cabc1 | 360887 | 1,06 | down |
| 5708547 | 7114652 | 1163886 | chaperone, ABC1 activity of bc1 complex homolog (S. pombe) | Cabc1 | 360887 | 1,01 | up   |
| 5718176 | 7114652 | 1163900 | chaperone, ABC1 activity of bc1 complex homolog (S. pombe) | Cabc1 | 360887 | 1,87 | up   |
| 5739178 | 7114652 | 1163896 | chaperone, ABC1 activity of bc1 complex homolog (S. pombe) | Cabc1 | 360887 | 1,50 | down |
| 5793551 | 7114652 | 1163890 | chaperone, ABC1 activity of bc1 complex homolog (S. pombe) | Cabc1 | 360887 | 1,14 | up   |
| 5810342 | 7114652 | 1163895 | chaperone, ABC1 activity of bc1 complex homolog (S. pombe) | Cabc1 | 360887 | 1,37 | up   |
| 5812855 | 7114652 | 1163898 | chaperone, ABC1 activity of bc1 complex homolog (S. pombe) | Cabc1 | 360887 | 1,10 | up   |
| 5933290 | 7114652 | 1163893 | chaperone, ABC1 activity of bc1 complex homolog (S. pombe) | Cabc1 | 360887 | 1,02 | up   |
| 6062805 | 7114652 | 1163900 | chaperone, ABC1 activity of bc1 complex homolog (S. pombe) | Cabc1 | 360887 | 2,22 | up   |
| 6156369 | 7114652 | 1163889 | chaperone, ABC1 activity of bc1 complex homolog (S. pombe) | Cabc1 | 360887 | 1,33 | down |
| 6299297 | 7114652 | 1163886 | chaperone, ABC1 activity of bc1 complex homolog (S. pombe) | Cabc1 | 360887 | 1,07 | up   |
| 6364123 | 7114652 | 1163888 | chaperone, ABC1 activity of bc1 complex homolog (S. pombe) | Cabc1 | 360887 | 1,29 | up   |
| 6382956 | 7114652 | 1163900 | chaperone, ABC1 activity of bc1 complex homolog (S. pombe) | Cabc1 | 360887 | 1,31 | up   |
| 6493975 | 7114652 | 1163887 | chaperone, ABC1 activity of bc1 complex homolog (S. pombe) | Cabc1 | 360887 | 1,50 | down |
| 6639753 | 7114652 | 1163899 | chaperone, ABC1 activity of bc1 complex homolog (S. pombe) | Cabc1 | 360887 | 1,52 | up   |
| 6711066 | 7114652 | 1163892 | chaperone, ABC1 activity of bc1 complex homolog (S. pombe) | Cabc1 | 360887 | 1,71 | down |
| 6730844 | 7114652 | 1163894 | chaperone, ABC1 activity of bc1 complex homolog (S. pombe) | Cabc1 | 360887 | 1,83 | up   |
| 5617859 | 7196065 | 1365712 | chaperonin containing Tcp1, subunit 3 (gamma)              | Cct3  | 295230 | 1,29 | up   |
| 5735581 | 7196065 | 1365726 | chaperonin containing Tcp1, subunit 3 (gamma)              | Cct3  | 295230 | 1,35 | down |
| 5783368 | 7196065 | 1365719 | chaperonin containing Tcp1, subunit 3 (gamma)              | Cct3  | 295230 | 1,21 | down |
| 5785121 | 7196065 | 1365725 | chaperonin containing Tcp1, subunit 3 (gamma)              | Cct3  | 295230 | 1,43 | up   |
| 5841477 | 7196065 | 1365724 | chaperonin containing Tcp1, subunit 3 (gamma)              | Cct3  | 295230 | 1,20 | down |
| 5877766 | 7196065 | 1365726 | chaperonin containing Tcp1, subunit 3 (gamma)              | Cct3  | 295230 | 1,56 | down |
| 5919243 | 7196065 | 1365716 | chaperonin containing Tcp1, subunit 3 (gamma)              | Cct3  | 295230 | 1,04 | down |
| 5953402 | 7196065 | 1365720 | chaperonin containing Tcp1, subunit 3 (gamma)              | Cct3  | 295230 | 1,06 | down |
| 6035748 | 7196065 | 1365718 | chaperonin containing Tcp1, subunit 3 (gamma)              | Cct3  | 295230 | 1,19 | up   |
| 6284469 | 7196065 | 1365717 | chaperonin containing Tcp1, subunit 3 (gamma)              | Cct3  | 295230 | 1,26 | down |
| 6365549 | 7196065 | 1365714 | chaperonin containing Tcp1, subunit 3 (gamma)              | Cct3  | 295230 | 1,04 | up   |
| 6409984 | 7196065 | 1365722 | chaperonin containing Tcp1, subunit 3 (gamma)              | Cct3  | 295230 | 1,03 | down |

|         |         |         |                                               |        |        |       |      |
|---------|---------|---------|-----------------------------------------------|--------|--------|-------|------|
| 6491999 | 7196065 | 1365721 | chaperonin containing Tcp1, subunit 3 (gamma) | Cct3   | 295230 | 1,22  | up   |
| 6553649 | 7196065 | 1365723 | chaperonin containing Tcp1, subunit 3 (gamma) | Cct3   | 295230 | 1,22  | down |
| 6641760 | 7196065 | 1365715 | chaperonin containing Tcp1, subunit 3 (gamma) | Cct3   | 295230 | 1,09  | up   |
| 6741939 | 7196065 | 1365713 | chaperonin containing Tcp1, subunit 3 (gamma) | Cct3   | 295230 | 1,16  | up   |
| 5809474 | 7070338 | 1056986 | chemokine (C-C motif) ligand 2                | Ccl2   | 24770  | 1,24  | up   |
| 5827720 | 7070338 | 1056985 | chemokine (C-C motif) ligand 2                | Ccl2   | 24770  | 4,75  | down |
| 5878091 | 7070338 | 1056988 | chemokine (C-C motif) ligand 2                | Ccl2   | 24770  | 2,01  | up   |
| 5921871 | 7070338 | 1056987 | chemokine (C-C motif) ligand 2                | Ccl2   | 24770  | 2,10  | up   |
| 6087932 | 7070338 | 1056989 | chemokine (C-C motif) ligand 2                | Ccl2   | 24770  | 3,07  | down |
| 6643693 | 7070338 | 1056988 | chemokine (C-C motif) ligand 2                | Ccl2   | 24770  | 1,26  | down |
| 5625408 | 7356847 | 1761784 | chemokine (C-C motif) ligand 20               | Ccl20  | 29538  | 1,06  | up   |
| 6236483 | 7356847 | 1761782 | chemokine (C-C motif) ligand 20               | Ccl20  | 29538  | 2,05  | up   |
| 6368153 | 7356847 | 1761781 | chemokine (C-C motif) ligand 20               | Ccl20  | 29538  | 3,42  | down |
| 6656884 | 7356847 | 1761781 | chemokine (C-C motif) ligand 20               | Ccl20  | 29538  | 2,25  | down |
| 6700626 | 7356847 | 1761783 | chemokine (C-C motif) ligand 20               | Ccl20  | 29538  | 1,88  | up   |
| 5839092 | 7190089 | 1350004 | chemokine (C-C motif) ligand 28               | Ccl28  | 114492 | 1,02  | down |
| 6026223 | 7190089 | 1350002 | chemokine (C-C motif) ligand 28               | Ccl28  | 114492 | 1,32  | down |
| 6178204 | 7190089 | 1350004 | chemokine (C-C motif) ligand 28               | Ccl28  | 114492 | 1,13  | down |
| 6239646 | 7190089 | 1350003 | chemokine (C-C motif) ligand 28               | Ccl28  | 114492 | 1,00  | up   |
| 6334854 | 7190089 | 1350002 | chemokine (C-C motif) ligand 28               | Ccl28  | 114492 | 1,03  | down |
| 6342353 | 7190089 | 1350004 | chemokine (C-C motif) ligand 28               | Ccl28  | 114492 | 2,05  | up   |
| 6410686 | 7190089 | 1350004 | chemokine (C-C motif) ligand 28               | Ccl28  | 114492 | 1,00  | down |
| 6697224 | 7190089 | 1350004 | chemokine (C-C motif) ligand 28               | Ccl28  | 114492 | 1,07  | down |
| 5840029 | 7080732 | 1080987 | chemokine (C-C motif) ligand 5                | Ccl5   | 81780  | 6,71  | down |
| 5938690 | 7080732 | 1080984 | chemokine (C-C motif) ligand 5                | Ccl5   | 81780  | 1,29  | up   |
| 6195065 | 7080732 | 1080985 | chemokine (C-C motif) ligand 5                | Ccl5   | 81780  | 4,79  | up   |
| 6234530 | 7080732 | 1080986 | chemokine (C-C motif) ligand 5                | Ccl5   | 81780  | 1,81  | down |
| 6557841 | 7080732 | 1080985 | chemokine (C-C motif) ligand 5                | Ccl5   | 81780  | 2,45  | down |
| 5631231 | 7116933 | 1169533 | chemokine (C-X-C motif) ligand 10             | Cxcl10 | 245920 | 1,07  | down |
| 5701565 | 7116933 | 1169532 | chemokine (C-X-C motif) ligand 10             | Cxcl10 | 245920 | 4,74  | down |
| 5780587 | 7116933 | 1169534 | chemokine (C-X-C motif) ligand 10             | Cxcl10 | 245920 | 1,23  | down |
| 6284588 | 7116933 | 1169532 | chemokine (C-X-C motif) ligand 10             | Cxcl10 | 245920 | 11,04 | down |
| 6325647 | 7116933 | 1169535 | chemokine (C-X-C motif) ligand 10             | Cxcl10 | 245920 | 1,50  | up   |
| 6433818 | 7116933 | 1169535 | chemokine (C-X-C motif) ligand 10             | Cxcl10 | 245920 | 1,66  | up   |
| 6531806 | 7116933 | 1169536 | chemokine (C-X-C motif) ligand 10             | Cxcl10 | 245920 | 1,61  | down |
| 5633763 | 7116931 | 1169527 | chemokine (C-X-C motif) ligand 11             | Cxcl11 | 305236 | 1,53  | up   |
| 5651799 | 7116931 | 1169530 | chemokine (C-X-C motif) ligand 11             | Cxcl11 | 305236 | 3,91  | down |
| 6128487 | 7116931 | 1169528 | chemokine (C-X-C motif) ligand 11             | Cxcl11 | 305236 | 1,32  | up   |
| 6503672 | 7116931 | 1169529 | chemokine (C-X-C motif) ligand 11             | Cxcl11 | 305236 | 1,02  | up   |
| 5689139 | 7079368 | 1078074 | chemokine (C-X-C motif) ligand 16             | Cxcl16 | 497942 | 2,89  | down |
| 5839731 | 7079368 | 1078070 | chemokine (C-X-C motif) ligand 16             | Cxcl16 | 497942 | 1,05  | down |
| 5899586 | 7079368 | 1078073 | chemokine (C-X-C motif) ligand 16             | Cxcl16 | 497942 | 1,19  | up   |
| 6390188 | 7079368 | 1078071 | chemokine (C-X-C motif) ligand 16             | Cxcl16 | 497942 | 1,10  | down |
| 6569082 | 7079368 | 1078070 | chemokine (C-X-C motif) ligand 16             | Cxcl16 | 497942 | 1,06  | down |
| 6588716 | 7079368 | 1078072 | chemokine (C-X-C motif) ligand 16             | Cxcl16 | 497942 | 1,08  | up   |
| 5754679 | 7116938 | 1169544 | chemokine (C-X-C motif) ligand 9              | Cxcl9  | 246759 | 3,28  | up   |
| 5856721 | 7116938 | 1169545 | chemokine (C-X-C motif) ligand 9              | Cxcl9  | 246759 | 1,25  | down |
| 6062432 | 7116938 | 1169542 | chemokine (C-X-C motif) ligand 9              | Cxcl9  | 246759 | 1,23  | down |
| 6384458 | 7116938 | 1169543 | chemokine (C-X-C motif) ligand 9              | Cxcl9  | 246759 | 3,09  | down |
| 6500752 | 7116938 | 1169546 | chemokine (C-X-C motif) ligand 9              | Cxcl9  | 246759 | 1,67  | up   |
| 6500964 | 7116938 | 1169541 | chemokine (C-X-C motif) ligand 9              | Cxcl9  | 246759 | 29,27 | down |
| 6593607 | 7116938 | 1169546 | chemokine (C-X-C motif) ligand 9              | Cxcl9  | 246759 | 2,91  | up   |
| 5648930 | 7058813 | 1028897 | chitinase domain containing 1                 | Chid1  | 293628 | 1,21  | down |
| 5825112 | 7058813 | 1028911 | chitinase domain containing 1                 | Chid1  | 293628 | 2,15  | up   |
| 5849019 | 7058813 | 1028909 | chitinase domain containing 1                 | Chid1  | 293628 | 1,10  | up   |
| 5877656 | 7058813 | 1028894 | chitinase domain containing 1                 | Chid1  | 293628 | 1,04  | up   |

|         |         |         |                                    |         |        |      |      |
|---------|---------|---------|------------------------------------|---------|--------|------|------|
| 5914481 | 7058813 | 1028907 | chitinase domain containing 1      | Chid1   | 293628 | 1,01 | up   |
| 5994978 | 7058813 | 1028895 | chitinase domain containing 1      | Chid1   | 293628 | 1,18 | up   |
| 6046017 | 7058813 | 1028910 | chitinase domain containing 1      | Chid1   | 293628 | 1,06 | down |
| 6199968 | 7058813 | 1028903 | chitinase domain containing 1      | Chid1   | 293628 | 1,01 | up   |
| 6201404 | 7058813 | 1028896 | chitinase domain containing 1      | Chid1   | 293628 | 1,17 | down |
| 6285387 | 7058813 | 1028914 | chitinase domain containing 1      | Chid1   | 293628 | 1,09 | down |
| 6308783 | 7058813 | 1028904 | chitinase domain containing 1      | Chid1   | 293628 | 1,53 | down |
| 6376646 | 7058813 | 1028913 | chitinase domain containing 1      | Chid1   | 293628 | 1,07 | down |
| 6689573 | 7058813 | 1028915 | chitinase domain containing 1      | Chid1   | 293628 | 1,04 | down |
| 6737825 | 7058813 | 1028916 | chitinase domain containing 1      | Chid1   | 293628 | 1,07 | up   |
| 5743778 | 7344093 | 1730348 | CHK1 checkpoint homolog (S. pombe) | Chek1   | 140583 | 1,43 | down |
| 5753726 | 7344093 | 1730341 | CHK1 checkpoint homolog (S. pombe) | Chek1   | 140583 | 1,23 | down |
| 5797227 | 7344093 | 1730349 | CHK1 checkpoint homolog (S. pombe) | Chek1   | 140583 | 1,17 | down |
| 5947504 | 7344093 | 1730342 | CHK1 checkpoint homolog (S. pombe) | Chek1   | 140583 | 1,36 | down |
| 5960887 | 7344093 | 1730351 | CHK1 checkpoint homolog (S. pombe) | Chek1   | 140583 | 2,11 | up   |
| 6012187 | 7344093 | 1730350 | CHK1 checkpoint homolog (S. pombe) | Chek1   | 140583 | 1,11 | up   |
| 6137001 | 7344093 | 1730344 | CHK1 checkpoint homolog (S. pombe) | Chek1   | 140583 | 1,29 | down |
| 6138195 | 7344093 | 1730343 | CHK1 checkpoint homolog (S. pombe) | Chek1   | 140583 | 1,03 | up   |
| 6149664 | 7344093 | 1730346 | CHK1 checkpoint homolog (S. pombe) | Chek1   | 140583 | 1,24 | up   |
| 6198329 | 7344093 | 1730347 | CHK1 checkpoint homolog (S. pombe) | Chek1   | 140583 | 1,15 | up   |
| 6251914 | 7344093 | 1730349 | CHK1 checkpoint homolog (S. pombe) | Chek1   | 140583 | 1,03 | up   |
| 6344066 | 7344093 | 1730345 | CHK1 checkpoint homolog (S. pombe) | Chek1   | 140583 | 1,75 | down |
| 6355854 | 7344093 | 1730341 | CHK1 checkpoint homolog (S. pombe) | Chek1   | 140583 | 1,51 | up   |
| 6396448 | 7344093 | 1730351 | CHK1 checkpoint homolog (S. pombe) | Chek1   | 140583 | 1,15 | up   |
| 6628688 | 7344093 | 1730352 | CHK1 checkpoint homolog (S. pombe) | Chek1   | 140583 | 1,01 | up   |
| 6675234 | 7344093 | 1730345 | CHK1 checkpoint homolog (S. pombe) | Chek1   | 140583 | 1,24 | up   |
| 5673107 | 7089599 | 1102636 | chloride channel 2                 | Clcn2   | 29232  | 1,05 | down |
| 5708693 | 7089599 | 1102646 | chloride channel 2                 | Clcn2   | 29232  | 1,46 | down |
| 5769718 | 7089599 | 1102649 | chloride channel 2                 | Clcn2   | 29232  | 1,37 | down |
| 5801180 | 7089599 | 1102634 | chloride channel 2                 | Clcn2   | 29232  | 1,07 | up   |
| 5803830 | 7089599 | 1102626 | chloride channel 2                 | Clcn2   | 29232  | 1,00 | up   |
| 5811279 | 7089599 | 1102640 | chloride channel 2                 | Clcn2   | 29232  | 1,81 | down |
| 5816490 | 7089599 | 1102630 | chloride channel 2                 | Clcn2   | 29232  | 1,82 | up   |
| 5822067 | 7089599 | 1102632 | chloride channel 2                 | Clcn2   | 29232  | 1,04 | up   |
| 5869518 | 7089599 | 1102647 | chloride channel 2                 | Clcn2   | 29232  | 1,44 | down |
| 5879438 | 7089599 | 1102633 | chloride channel 2                 | Clcn2   | 29232  | 1,07 | up   |
| 5954115 | 7089599 | 1102635 | chloride channel 2                 | Clcn2   | 29232  | 1,28 | down |
| 5988353 | 7089599 | 1102638 | chloride channel 2                 | Clcn2   | 29232  | 1,29 | down |
| 6000861 | 7089599 | 1102645 | chloride channel 2                 | Clcn2   | 29232  | 1,20 | up   |
| 6001340 | 7089599 | 1102631 | chloride channel 2                 | Clcn2   | 29232  | 1,16 | up   |
| 6074200 | 7089599 | 1102648 | chloride channel 2                 | Clcn2   | 29232  | 1,69 | down |
| 6177543 | 7089599 | 1102640 | chloride channel 2                 | Clcn2   | 29232  | 1,28 | down |
| 6257098 | 7089599 | 1102629 | chloride channel 2                 | Clcn2   | 29232  | 1,53 | down |
| 6264094 | 7089599 | 1102637 | chloride channel 2                 | Clcn2   | 29232  | 1,26 | down |
| 6281351 | 7089599 | 1102627 | chloride channel 2                 | Clcn2   | 29232  | 1,08 | down |
| 6298597 | 7089599 | 1102639 | chloride channel 2                 | Clcn2   | 29232  | 2,16 | down |
| 6374150 | 7089599 | 1102642 | chloride channel 2                 | Clcn2   | 29232  | 1,24 | up   |
| 6447990 | 7089599 | 1102626 | chloride channel 2                 | Clcn2   | 29232  | 1,13 | up   |
| 6542376 | 7089599 | 1102643 | chloride channel 2                 | Clcn2   | 29232  | 1,07 | down |
| 6555348 | 7089599 | 1102628 | chloride channel 2                 | Clcn2   | 29232  | 1,04 | down |
| 6561781 | 7089599 | 1102641 | chloride channel 2                 | Clcn2   | 29232  | 1,70 | down |
| 6681101 | 7089599 | 1102644 | chloride channel 2                 | Clcn2   | 29232  | 1,09 | up   |
| 5626501 | 7374466 | 1807862 | chloride channel 4-2               | Clcn4-2 | 60586  | 1,24 | down |
| 5731469 | 7374466 | 1807861 | chloride channel 4-2               | Clcn4-2 | 60586  | 1,04 | down |
| 5762436 | 7374466 | 1807859 | chloride channel 4-2               | Clcn4-2 | 60586  | 1,13 | down |
| 5861755 | 7374466 | 1807867 | chloride channel 4-2               | Clcn4-2 | 60586  | 1,13 | down |

|         |         |         |                                                      |         |        |      |      |
|---------|---------|---------|------------------------------------------------------|---------|--------|------|------|
| 5902106 | 7374466 | 1807858 | chloride channel 4-2                                 | Clcn4-2 | 60586  | 1,32 | down |
| 5904792 | 7374466 | 1807864 | chloride channel 4-2                                 | Clcn4-2 | 60586  | 1,04 | down |
| 5984739 | 7374466 | 1807855 | chloride channel 4-2                                 | Clcn4-2 | 60586  | 1,13 | down |
| 6017165 | 7374466 | 1807862 | chloride channel 4-2                                 | Clcn4-2 | 60586  | 1,02 | up   |
| 6035395 | 7374466 | 1807854 | chloride channel 4-2                                 | Clcn4-2 | 60586  | 1,35 | up   |
| 6124188 | 7374466 | 1807866 | chloride channel 4-2                                 | Clcn4-2 | 60586  | 1,34 | up   |
| 6142951 | 7374466 | 1807853 | chloride channel 4-2                                 | Clcn4-2 | 60586  | 1,24 | up   |
| 6195624 | 7374466 | 1807860 | chloride channel 4-2                                 | Clcn4-2 | 60586  | 2,14 | up   |
| 6254459 | 7374466 | 1807865 | chloride channel 4-2                                 | Clcn4-2 | 60586  | 1,01 | down |
| 6297781 | 7374466 | 1807862 | chloride channel 4-2                                 | Clcn4-2 | 60586  | 1,08 | up   |
| 6607364 | 7374466 | 1807857 | chloride channel 4-2                                 | Clcn4-2 | 60586  | 1,04 | up   |
| 6662314 | 7374466 | 1807856 | chloride channel 4-2                                 | Clcn4-2 | 60586  | 1,25 | up   |
| 6704692 | 7374466 | 1807863 | chloride channel 4-2                                 | Clcn4-2 | 60586  | 1,06 | down |
| 5652345 | 7215277 | 1411034 | chloride channel, calcium activated, family member 4 | Clca4   | 362053 | 1,16 | down |
| 5652813 | 7215277 | 1411044 | chloride channel, calcium activated, family member 4 | Clca4   | 362053 | 1,21 | down |
| 5703047 | 7215277 | 1411048 | chloride channel, calcium activated, family member 4 | Clca4   | 362053 | 1,53 | up   |
| 5709539 | 7215277 | 1411036 | chloride channel, calcium activated, family member 4 | Clca4   | 362053 | 1,26 | down |
| 5723134 | 7215277 | 1411048 | chloride channel, calcium activated, family member 4 | Clca4   | 362053 | 1,48 | down |
| 5729170 | 7215277 | 1411039 | chloride channel, calcium activated, family member 4 | Clca4   | 362053 | 1,00 | down |
| 5757242 | 7215277 | 1411045 | chloride channel, calcium activated, family member 4 | Clca4   | 362053 | 1,05 | down |
| 5806844 | 7215277 | 1411040 | chloride channel, calcium activated, family member 4 | Clca4   | 362053 | 1,00 | up   |
| 5854867 | 7215277 | 1411043 | chloride channel, calcium activated, family member 4 | Clca4   | 362053 | 1,03 | up   |
| 5855637 | 7215277 | 1411041 | chloride channel, calcium activated, family member 4 | Clca4   | 362053 | 2,20 | down |
| 5909468 | 7215277 | 1411046 | chloride channel, calcium activated, family member 4 | Clca4   | 362053 | 1,07 | down |
| 5939845 | 7215277 | 1411047 | chloride channel, calcium activated, family member 4 | Clca4   | 362053 | 1,36 | up   |
| 6049311 | 7215277 | 1411034 | chloride channel, calcium activated, family member 4 | Clca4   | 362053 | 1,00 | up   |
| 6459667 | 7215277 | 1411042 | chloride channel, calcium activated, family member 4 | Clca4   | 362053 | 1,15 | down |
| 6559119 | 7215277 | 1411035 | chloride channel, calcium activated, family member 4 | Clca4   | 362053 | 1,23 | down |
| 6618166 | 7215277 | 1411045 | chloride channel, calcium activated, family member 4 | Clca4   | 362053 | 1,07 | down |
| 6635081 | 7215277 | 1411050 | chloride channel, calcium activated, family member 4 | Clca4   | 362053 | 1,04 | down |
| 6652703 | 7215277 | 1411049 | chloride channel, calcium activated, family member 4 | Clca4   | 362053 | 1,31 | down |
| 6661872 | 7215277 | 1411038 | chloride channel, calcium activated, family member 4 | Clca4   | 362053 | 1,61 | down |
| 6717457 | 7215277 | 1411037 | chloride channel, calcium activated, family member 4 | Clca4   | 362053 | 1,00 | up   |
| 6721031 | 7215277 | 1411034 | chloride channel, calcium activated, family member 4 | Clca4   | 362053 | 1,04 | up   |
| 5622768 | 7038898 | 982841  | choline kinase alpha                                 | Chka    | 29194  | 1,74 | down |
| 5636276 | 7038898 | 982845  | choline kinase alpha                                 | Chka    | 29194  | 1,15 | up   |
| 5642058 | 7038898 | 982851  | choline kinase alpha                                 | Chka    | 29194  | 1,01 | down |
| 5659883 | 7038898 | 982850  | choline kinase alpha                                 | Chka    | 29194  | 1,25 | down |
| 5707539 | 7038898 | 982846  | choline kinase alpha                                 | Chka    | 29194  | 1,11 | up   |
| 5788787 | 7038898 | 982853  | choline kinase alpha                                 | Chka    | 29194  | 1,14 | up   |
| 5790433 | 7038898 | 982843  | choline kinase alpha                                 | Chka    | 29194  | 1,14 | up   |
| 5805380 | 7038898 | 982842  | choline kinase alpha                                 | Chka    | 29194  | 1,21 | up   |
| 5846602 | 7038898 | 982853  | choline kinase alpha                                 | Chka    | 29194  | 1,36 | up   |
| 5861363 | 7038898 | 982842  | choline kinase alpha                                 | Chka    | 29194  | 1,33 | down |
| 5947197 | 7038898 | 982842  | choline kinase alpha                                 | Chka    | 29194  | 1,13 | down |
| 6370448 | 7038898 | 982849  | choline kinase alpha                                 | Chka    | 29194  | 1,05 | up   |
| 6453248 | 7038898 | 982842  | choline kinase alpha                                 | Chka    | 29194  | 2,50 | down |
| 6494864 | 7038898 | 982844  | choline kinase alpha                                 | Chka    | 29194  | 1,28 | up   |
| 6518452 | 7038898 | 982847  | choline kinase alpha                                 | Chka    | 29194  | 1,14 | up   |
| 6572644 | 7038898 | 982852  | choline kinase alpha                                 | Chka    | 29194  | 1,14 | down |
| 6683490 | 7038898 | 982848  | choline kinase alpha                                 | Chka    | 29194  | 1,58 | up   |
| 6702682 | 7038898 | 982842  | choline kinase alpha                                 | Chka    | 29194  | 1,83 | down |
| 5911377 | 7357164 | 1762578 | cholinergic receptor, nicotinic, gamma               | Chrng   | 25753  | 1,07 | down |
| 5941507 | 7357164 | 1762587 | cholinergic receptor, nicotinic, gamma               | Chrng   | 25753  | 2,09 | down |
| 6036845 | 7357164 | 1762581 | cholinergic receptor, nicotinic, gamma               | Chrng   | 25753  | 1,30 | up   |
| 6068103 | 7357164 | 1762586 | cholinergic receptor, nicotinic, gamma               | Chrng   | 25753  | 1,51 | down |

|         |         |         |                                               |        |        |      |      |
|---------|---------|---------|-----------------------------------------------|--------|--------|------|------|
| 6078796 | 7357164 | 1762585 | cholinergic receptor, nicotinic, gamma        | Chrng  | 25753  | 1,12 | up   |
| 6100783 | 7357164 | 1762582 | cholinergic receptor, nicotinic, gamma        | Chrng  | 25753  | 1,02 | up   |
| 6192889 | 7357164 | 1762579 | cholinergic receptor, nicotinic, gamma        | Chrng  | 25753  | 1,35 | down |
| 6358919 | 7357164 | 1762589 | cholinergic receptor, nicotinic, gamma        | Chrng  | 25753  | 1,04 | up   |
| 6435873 | 7357164 | 1762578 | cholinergic receptor, nicotinic, gamma        | Chrng  | 25753  | 1,01 | down |
| 6454009 | 7357164 | 1762581 | cholinergic receptor, nicotinic, gamma        | Chrng  | 25753  | 1,02 | down |
| 6470382 | 7357164 | 1762586 | cholinergic receptor, nicotinic, gamma        | Chrng  | 25753  | 1,02 | up   |
| 6491476 | 7357164 | 1762588 | cholinergic receptor, nicotinic, gamma        | Chrng  | 25753  | 1,18 | down |
| 6520592 | 7357164 | 1762584 | cholinergic receptor, nicotinic, gamma        | Chrng  | 25753  | 1,50 | down |
| 6541940 | 7357164 | 1762580 | cholinergic receptor, nicotinic, gamma        | Chrng  | 25753  | 1,02 | up   |
| 6616530 | 7357164 | 1762587 | cholinergic receptor, nicotinic, gamma        | Chrng  | 25753  | 1,07 | up   |
| 6679594 | 7357164 | 1762590 | cholinergic receptor, nicotinic, gamma        | Chrng  | 25753  | 1,14 | down |
| 6679890 | 7357164 | 1762589 | cholinergic receptor, nicotinic, gamma        | Chrng  | 25753  | 1,02 | down |
| 6741031 | 7357164 | 1762583 | cholinergic receptor, nicotinic, gamma        | Chrng  | 25753  | 1,00 | up   |
| 5729838 | 7340657 | 1721629 | chondroitin sulfate proteoglycan 5            | Cspg5  | 50568  | 2,02 | down |
| 5791488 | 7340657 | 1721628 | chondroitin sulfate proteoglycan 5            | Cspg5  | 50568  | 1,06 | up   |
| 6069931 | 7340657 | 1721628 | chondroitin sulfate proteoglycan 5            | Cspg5  | 50568  | 1,26 | down |
| 6083079 | 7340657 | 1721630 | chondroitin sulfate proteoglycan 5            | Cspg5  | 50568  | 1,13 | down |
| 6201550 | 7340657 | 1721628 | chondroitin sulfate proteoglycan 5            | Cspg5  | 50568  | 1,16 | down |
| 6426333 | 7340657 | 1721631 | chondroitin sulfate proteoglycan 5            | Cspg5  | 50568  | 1,24 | up   |
| 6428048 | 7340657 | 1721628 | chondroitin sulfate proteoglycan 5            | Cspg5  | 50568  | 1,68 | down |
| 6443830 | 7340657 | 1721628 | chondroitin sulfate proteoglycan 5            | Cspg5  | 50568  | 2,07 | down |
| 6467330 | 7340657 | 1721632 | chondroitin sulfate proteoglycan 5            | Cspg5  | 50568  | 1,36 | up   |
| 6532391 | 7340657 | 1721628 | chondroitin sulfate proteoglycan 5            | Cspg5  | 50568  | 1,27 | down |
| 6655286 | 7340657 | 1721628 | chondroitin sulfate proteoglycan 5            | Cspg5  | 50568  | 1,07 | up   |
| 6699732 | 7340657 | 1721630 | chondroitin sulfate proteoglycan 5            | Cspg5  | 50568  | 1,50 | up   |
| 6707606 | 7340657 | 1721631 | chondroitin sulfate proteoglycan 5            | Cspg5  | 50568  | 2,07 | up   |
| 5684603 | 7095021 | 1115125 | chordin                                       | Chrd   | 117275 | 1,97 | down |
| 5695811 | 7095021 | 1115121 | chordin                                       | Chrd   | 117275 | 1,01 | up   |
| 5710283 | 7095021 | 1115124 | chordin                                       | Chrd   | 117275 | 1,05 | down |
| 5778022 | 7095021 | 1115125 | chordin                                       | Chrd   | 117275 | 1,24 | down |
| 5809786 | 7095021 | 1115120 | chordin                                       | Chrd   | 117275 | 1,24 | down |
| 6230338 | 7095021 | 1115122 | chordin                                       | Chrd   | 117275 | 1,40 | down |
| 5774628 | 7086975 | 1095337 | chromatin assembly factor 1, subunit B (p60)  | Chaf1b | 288242 | 1,32 | up   |
| 5914303 | 7086975 | 1095334 | chromatin assembly factor 1, subunit B (p60)  | Chaf1b | 288242 | 1,03 | down |
| 5927154 | 7086975 | 1095331 | chromatin assembly factor 1, subunit B (p60)  | Chaf1b | 288242 | 1,12 | up   |
| 6005754 | 7086975 | 1095326 | chromatin assembly factor 1, subunit B (p60)  | Chaf1b | 288242 | 1,00 | up   |
| 6081691 | 7086975 | 1095332 | chromatin assembly factor 1, subunit B (p60)  | Chaf1b | 288242 | 1,21 | down |
| 6107506 | 7086975 | 1095323 | chromatin assembly factor 1, subunit B (p60)  | Chaf1b | 288242 | 1,07 | down |
| 6124285 | 7086975 | 1095335 | chromatin assembly factor 1, subunit B (p60)  | Chaf1b | 288242 | 1,29 | down |
| 6182217 | 7086975 | 1095325 | chromatin assembly factor 1, subunit B (p60)  | Chaf1b | 288242 | 1,16 | up   |
| 6193350 | 7086975 | 1095329 | chromatin assembly factor 1, subunit B (p60)  | Chaf1b | 288242 | 1,50 | up   |
| 6302026 | 7086975 | 1095324 | chromatin assembly factor 1, subunit B (p60)  | Chaf1b | 288242 | 1,16 | up   |
| 6415331 | 7086975 | 1095324 | chromatin assembly factor 1, subunit B (p60)  | Chaf1b | 288242 | 2,06 | down |
| 6418454 | 7086975 | 1095336 | chromatin assembly factor 1, subunit B (p60)  | Chaf1b | 288242 | 1,09 | down |
| 6483189 | 7086975 | 1095330 | chromatin assembly factor 1, subunit B (p60)  | Chaf1b | 288242 | 1,20 | down |
| 6536727 | 7086975 | 1095327 | chromatin assembly factor 1, subunit B (p60)  | Chaf1b | 288242 | 1,91 | down |
| 6558771 | 7086975 | 1095333 | chromatin assembly factor 1, subunit B (p60)  | Chaf1b | 288242 | 1,19 | down |
| 5695469 | 7171525 | 1303474 | chromatin modifying protein 1B                | Chmp1b | 689364 | 1,17 | up   |
| 6267924 | 7171525 | 1303474 | chromatin modifying protein 1B                | Chmp1b | 689364 | 1,07 | up   |
| 6302320 | 7171525 | 1303474 | chromatin modifying protein 1B                | Chmp1b | 689364 | 1,11 | down |
| 6589323 | 7171525 | 1303475 | chromatin modifying protein 1B                | Chmp1b | 689364 | 1,40 | down |
| 5626148 | 7235503 | 1462084 | chromosome segregation 1-like (S. cerevisiae) | Cse1l  | 362273 | 1,13 | up   |
| 5676614 | 7235503 | 1462069 | chromosome segregation 1-like (S. cerevisiae) | Cse1l  | 362273 | 1,42 | down |
| 5700555 | 7235503 | 1462077 | chromosome segregation 1-like (S. cerevisiae) | Cse1l  | 362273 | 1,42 | up   |
| 5735589 | 7235503 | 1462074 | chromosome segregation 1-like (S. cerevisiae) | Cse1l  | 362273 | 1,18 | up   |

|         |         |         |                                                        |       |        |      |      |
|---------|---------|---------|--------------------------------------------------------|-------|--------|------|------|
| 5738805 | 7235503 | 1462072 | chromosome segregation 1-like ( <i>S. cerevisiae</i> ) | Cse11 | 362273 | 1,34 | down |
| 5874126 | 7235503 | 1462060 | chromosome segregation 1-like ( <i>S. cerevisiae</i> ) | Cse11 | 362273 | 1,17 | up   |
| 5897291 | 7235503 | 1462061 | chromosome segregation 1-like ( <i>S. cerevisiae</i> ) | Cse11 | 362273 | 1,04 | up   |
| 5982444 | 7235503 | 1462080 | chromosome segregation 1-like ( <i>S. cerevisiae</i> ) | Cse11 | 362273 | 1,10 | up   |
| 6051331 | 7235503 | 1462067 | chromosome segregation 1-like ( <i>S. cerevisiae</i> ) | Cse11 | 362273 | 2,58 | up   |
| 6073445 | 7235503 | 1462078 | chromosome segregation 1-like ( <i>S. cerevisiae</i> ) | Cse11 | 362273 | 1,14 | down |
| 6087532 | 7235503 | 1462066 | chromosome segregation 1-like ( <i>S. cerevisiae</i> ) | Cse11 | 362273 | 1,05 | down |
| 6138928 | 7235503 | 1462064 | chromosome segregation 1-like ( <i>S. cerevisiae</i> ) | Cse11 | 362273 | 1,10 | down |
| 6220711 | 7235503 | 1462079 | chromosome segregation 1-like ( <i>S. cerevisiae</i> ) | Cse11 | 362273 | 1,27 | up   |
| 6234446 | 7235503 | 1462071 | chromosome segregation 1-like ( <i>S. cerevisiae</i> ) | Cse11 | 362273 | 1,01 | up   |
| 6298881 | 7235503 | 1462083 | chromosome segregation 1-like ( <i>S. cerevisiae</i> ) | Cse11 | 362273 | 1,43 | up   |
| 6308411 | 7235503 | 1462081 | chromosome segregation 1-like ( <i>S. cerevisiae</i> ) | Cse11 | 362273 | 1,21 | down |
| 6396880 | 7235503 | 1462065 | chromosome segregation 1-like ( <i>S. cerevisiae</i> ) | Cse11 | 362273 | 1,34 | down |
| 6408818 | 7235503 | 1462082 | chromosome segregation 1-like ( <i>S. cerevisiae</i> ) | Cse11 | 362273 | 1,01 | down |
| 6441336 | 7235503 | 1462075 | chromosome segregation 1-like ( <i>S. cerevisiae</i> ) | Cse11 | 362273 | 1,15 | up   |
| 6513525 | 7235503 | 1462068 | chromosome segregation 1-like ( <i>S. cerevisiae</i> ) | Cse11 | 362273 | 1,38 | down |
| 6525190 | 7235503 | 1462070 | chromosome segregation 1-like ( <i>S. cerevisiae</i> ) | Cse11 | 362273 | 1,20 | up   |
| 6537068 | 7235503 | 1462076 | chromosome segregation 1-like ( <i>S. cerevisiae</i> ) | Cse11 | 362273 | 1,37 | down |
| 6561573 | 7235503 | 1462084 | chromosome segregation 1-like ( <i>S. cerevisiae</i> ) | Cse11 | 362273 | 1,12 | down |
| 6649612 | 7235503 | 1462062 | chromosome segregation 1-like ( <i>S. cerevisiae</i> ) | Cse11 | 362273 | 1,28 | up   |
| 6685969 | 7235503 | 1462073 | chromosome segregation 1-like ( <i>S. cerevisiae</i> ) | Cse11 | 362273 | 1,20 | down |
| 6723440 | 7235503 | 1462063 | chromosome segregation 1-like ( <i>S. cerevisiae</i> ) | Cse11 | 362273 | 1,53 | down |
| 5659849 | 7292517 | 1602526 | ciliary rootlet coiled-coil, rootletin                 | Crocc | 313663 | 1,10 | up   |
| 5835357 | 7292517 | 1602527 | ciliary rootlet coiled-coil, rootletin                 | Crocc | 313663 | 1,77 | down |
| 5861647 | 7292517 | 1602535 | ciliary rootlet coiled-coil, rootletin                 | Crocc | 313663 | 1,04 | down |
| 5892295 | 7292517 | 1602543 | ciliary rootlet coiled-coil, rootletin                 | Crocc | 313663 | 1,01 | down |
| 5901379 | 7292517 | 1602530 | ciliary rootlet coiled-coil, rootletin                 | Crocc | 313663 | 1,65 | down |
| 5966783 | 7292517 | 1602521 | ciliary rootlet coiled-coil, rootletin                 | Crocc | 313663 | 1,19 | up   |
| 6020627 | 7292517 | 1602528 | ciliary rootlet coiled-coil, rootletin                 | Crocc | 313663 | 1,06 | down |
| 6059249 | 7292517 | 1602533 | ciliary rootlet coiled-coil, rootletin                 | Crocc | 313663 | 1,29 | up   |
| 6112065 | 7292517 | 1602527 | ciliary rootlet coiled-coil, rootletin                 | Crocc | 313663 | 1,25 | up   |
| 6140276 | 7292517 | 1602524 | ciliary rootlet coiled-coil, rootletin                 | Crocc | 313663 | 1,32 | down |
| 6314454 | 7292517 | 1602536 | ciliary rootlet coiled-coil, rootletin                 | Crocc | 313663 | 1,12 | down |
| 6333199 | 7292517 | 1602529 | ciliary rootlet coiled-coil, rootletin                 | Crocc | 313663 | 1,52 | up   |
| 6376771 | 7292517 | 1602544 | ciliary rootlet coiled-coil, rootletin                 | Crocc | 313663 | 1,08 | down |
| 6429925 | 7292517 | 1602537 | ciliary rootlet coiled-coil, rootletin                 | Crocc | 313663 | 1,09 | up   |
| 6439328 | 7292517 | 1602541 | ciliary rootlet coiled-coil, rootletin                 | Crocc | 313663 | 1,26 | up   |
| 6515708 | 7292517 | 1602530 | ciliary rootlet coiled-coil, rootletin                 | Crocc | 313663 | 1,01 | up   |
| 6548722 | 7292517 | 1602531 | ciliary rootlet coiled-coil, rootletin                 | Crocc | 313663 | 1,26 | down |
| 6557053 | 7292517 | 1602532 | ciliary rootlet coiled-coil, rootletin                 | Crocc | 313663 | 1,48 | up   |
| 6572485 | 7292517 | 1602523 | ciliary rootlet coiled-coil, rootletin                 | Crocc | 313663 | 1,35 | down |
| 6576541 | 7292517 | 1602534 | ciliary rootlet coiled-coil, rootletin                 | Crocc | 313663 | 1,25 | up   |
| 6625270 | 7292517 | 1602545 | ciliary rootlet coiled-coil, rootletin                 | Crocc | 313663 | 1,05 | up   |
| 6646343 | 7292517 | 1602542 | ciliary rootlet coiled-coil, rootletin                 | Crocc | 313663 | 1,42 | down |
| 6667936 | 7292517 | 1602539 | ciliary rootlet coiled-coil, rootletin                 | Crocc | 313663 | 1,05 | down |
| 6707836 | 7292517 | 1602525 | ciliary rootlet coiled-coil, rootletin                 | Crocc | 313663 | 1,47 | down |
| 5799546 | 7211363 | 1402035 | cingulin                                               | Cgn   | 310655 | 1,33 | down |
| 6331522 | 7211363 | 1402035 | cingulin                                               | Cgn   | 310655 | 1,52 | up   |
| 6694851 | 7211363 | 1402035 | cingulin                                               | Cgn   | 310655 | 1,06 | up   |
| 6719811 | 7211363 | 1402035 | cingulin                                               | Cgn   | 310655 | 1,04 | down |
| 5668677 | 7347396 | 1738516 | cingulin-like 1                                        | Cgn11 | 315795 | 1,01 | down |
| 5803889 | 7347396 | 1738487 | cingulin-like 1                                        | Cgn11 | 315795 | 1,02 | up   |
| 5878828 | 7347396 | 1738520 | cingulin-like 1                                        | Cgn11 | 315795 | 1,15 | up   |
| 5949689 | 7347396 | 1738515 | cingulin-like 1                                        | Cgn11 | 315795 | 1,60 | up   |
| 6000921 | 7347396 | 1738482 | cingulin-like 1                                        | Cgn11 | 315795 | 1,17 | down |
| 6041249 | 7347396 | 1738490 | cingulin-like 1                                        | Cgn11 | 315795 | 1,20 | up   |

|         |         |         |                                                      |       |        |      |      |
|---------|---------|---------|------------------------------------------------------|-------|--------|------|------|
| 6129740 | 7347396 | 1738495 | cingulin-like 1                                      | Cgnl1 | 315795 | 1,19 | up   |
| 6235131 | 7347396 | 1738513 | cingulin-like 1                                      | Cgnl1 | 315795 | 1,10 | up   |
| 6274036 | 7347396 | 1738521 | cingulin-like 1                                      | Cgnl1 | 315795 | 1,46 | down |
| 6329734 | 7347396 | 1738493 | cingulin-like 1                                      | Cgnl1 | 315795 | 1,39 | up   |
| 6383791 | 7347396 | 1738484 | cingulin-like 1                                      | Cgnl1 | 315795 | 2,53 | up   |
| 6411773 | 7347396 | 1738482 | cingulin-like 1                                      | Cgnl1 | 315795 | 1,01 | up   |
| 6446765 | 7347396 | 1738486 | cingulin-like 1                                      | Cgnl1 | 315795 | 1,32 | down |
| 6485540 | 7347396 | 1738482 | cingulin-like 1                                      | Cgnl1 | 315795 | 1,67 | down |
| 6518953 | 7347396 | 1738516 | cingulin-like 1                                      | Cgnl1 | 315795 | 1,40 | down |
| 6522523 | 7347396 | 1738496 | cingulin-like 1                                      | Cgnl1 | 315795 | 1,14 | down |
| 6537011 | 7347396 | 1738482 | cingulin-like 1                                      | Cgnl1 | 315795 | 1,71 | up   |
| 6554761 | 7347396 | 1738519 | cingulin-like 1                                      | Cgnl1 | 315795 | 1,03 | down |
| 6555588 | 7347396 | 1738526 | cingulin-like 1                                      | Cgnl1 | 315795 | 1,10 | down |
| 6571393 | 7347396 | 1738492 | cingulin-like 1                                      | Cgnl1 | 315795 | 1,04 | up   |
| 6592647 | 7347396 | 1738483 | cingulin-like 1                                      | Cgnl1 | 315795 | 1,10 | down |
| 6676178 | 7347396 | 1738494 | cingulin-like 1                                      | Cgnl1 | 315795 | 1,76 | up   |
| 6679264 | 7347396 | 1738517 | cingulin-like 1                                      | Cgnl1 | 315795 | 1,07 | down |
| 5942550 | 7324337 | 1682061 | citrate synthase                                     | Cs    | 170587 | 1,29 | up   |
| 6022520 | 7324337 | 1682062 | citrate synthase                                     | Cs    | 170587 | 1,18 | up   |
| 5625459 | 7102841 | 1134782 | citron (rho-interacting, serine/threonine kinase 21) | Cit   | 83620  | 1,51 | down |
| 5626301 | 7102841 | 1134774 | citron (rho-interacting, serine/threonine kinase 21) | Cit   | 83620  | 1,21 | up   |
| 5675034 | 7102841 | 1134776 | citron (rho-interacting, serine/threonine kinase 21) | Cit   | 83620  | 1,61 | down |
| 5770060 | 7102841 | 1134763 | citron (rho-interacting, serine/threonine kinase 21) | Cit   | 83620  | 1,13 | up   |
| 5771965 | 7102841 | 1134778 | citron (rho-interacting, serine/threonine kinase 21) | Cit   | 83620  | 1,34 | up   |
| 5825908 | 7102841 | 1134780 | citron (rho-interacting, serine/threonine kinase 21) | Cit   | 83620  | 1,21 | down |
| 5866008 | 7102841 | 1134790 | citron (rho-interacting, serine/threonine kinase 21) | Cit   | 83620  | 1,13 | down |
| 5878387 | 7102841 | 1134767 | citron (rho-interacting, serine/threonine kinase 21) | Cit   | 83620  | 1,11 | down |
| 6002201 | 7102841 | 1134755 | citron (rho-interacting, serine/threonine kinase 21) | Cit   | 83620  | 1,05 | down |
| 6007210 | 7102841 | 1134764 | citron (rho-interacting, serine/threonine kinase 21) | Cit   | 83620  | 1,32 | up   |
| 6031543 | 7102841 | 1134757 | citron (rho-interacting, serine/threonine kinase 21) | Cit   | 83620  | 1,16 | up   |
| 6103827 | 7102841 | 1134783 | citron (rho-interacting, serine/threonine kinase 21) | Cit   | 83620  | 1,17 | down |
| 6149858 | 7102841 | 1134772 | citron (rho-interacting, serine/threonine kinase 21) | Cit   | 83620  | 1,14 | down |
| 6156667 | 7102841 | 1134775 | citron (rho-interacting, serine/threonine kinase 21) | Cit   | 83620  | 1,16 | up   |
| 6233020 | 7102841 | 1134788 | citron (rho-interacting, serine/threonine kinase 21) | Cit   | 83620  | 1,15 | up   |
| 6263483 | 7102841 | 1134756 | citron (rho-interacting, serine/threonine kinase 21) | Cit   | 83620  | 1,57 | up   |
| 6274070 | 7102841 | 1134765 | citron (rho-interacting, serine/threonine kinase 21) | Cit   | 83620  | 1,00 | down |
| 6315078 | 7102841 | 1134760 | citron (rho-interacting, serine/threonine kinase 21) | Cit   | 83620  | 1,36 | down |
| 6318520 | 7102841 | 1134758 | citron (rho-interacting, serine/threonine kinase 21) | Cit   | 83620  | 1,14 | down |
| 6335389 | 7102841 | 1134762 | citron (rho-interacting, serine/threonine kinase 21) | Cit   | 83620  | 1,46 | up   |
| 6360158 | 7102841 | 1134786 | citron (rho-interacting, serine/threonine kinase 21) | Cit   | 83620  | 1,30 | up   |
| 6387796 | 7102841 | 1134779 | citron (rho-interacting, serine/threonine kinase 21) | Cit   | 83620  | 1,13 | up   |
| 6416053 | 7102841 | 1134773 | citron (rho-interacting, serine/threonine kinase 21) | Cit   | 83620  | 1,07 | up   |
| 6420472 | 7102841 | 1134759 | citron (rho-interacting, serine/threonine kinase 21) | Cit   | 83620  | 1,10 | down |
| 6441615 | 7102841 | 1134768 | citron (rho-interacting, serine/threonine kinase 21) | Cit   | 83620  | 1,54 | up   |
| 6443796 | 7102841 | 1134777 | citron (rho-interacting, serine/threonine kinase 21) | Cit   | 83620  | 1,08 | down |
| 6448592 | 7102841 | 1134769 | citron (rho-interacting, serine/threonine kinase 21) | Cit   | 83620  | 1,09 | up   |
| 6448908 | 7102841 | 1134771 | citron (rho-interacting, serine/threonine kinase 21) | Cit   | 83620  | 1,57 | down |
| 6474038 | 7102841 | 1134766 | citron (rho-interacting, serine/threonine kinase 21) | Cit   | 83620  | 1,36 | up   |
| 6476052 | 7102841 | 1134784 | citron (rho-interacting, serine/threonine kinase 21) | Cit   | 83620  | 1,85 | up   |
| 6591380 | 7102841 | 1134781 | citron (rho-interacting, serine/threonine kinase 21) | Cit   | 83620  | 1,57 | up   |
| 6594810 | 7102841 | 1134770 | citron (rho-interacting, serine/threonine kinase 21) | Cit   | 83620  | 1,71 | up   |
| 6674335 | 7102841 | 1134753 | citron (rho-interacting, serine/threonine kinase 21) | Cit   | 83620  | 1,19 | down |
| 6676765 | 7102841 | 1134761 | citron (rho-interacting, serine/threonine kinase 21) | Cit   | 83620  | 1,10 | up   |
| 6697970 | 7102841 | 1134771 | citron (rho-interacting, serine/threonine kinase 21) | Cit   | 83620  | 3,23 | down |
| 6704891 | 7102841 | 1134785 | citron (rho-interacting, serine/threonine kinase 21) | Cit   | 83620  | 1,38 | up   |
| 6730018 | 7102841 | 1134787 | citron (rho-interacting, serine/threonine kinase 21) | Cit   | 83620  | 1,10 | down |

|         |         |         |                                                      |        |        |      |      |
|---------|---------|---------|------------------------------------------------------|--------|--------|------|------|
| 6731738 | 7102841 | 1134754 | citron (rho-interacting, serine/threonine kinase 21) | Cit    | 83620  | 1,11 | down |
| 6740727 | 7102841 | 1134789 | citron (rho-interacting, serine/threonine kinase 21) | Cit    | 83620  | 1,07 | down |
| 5734677 | 7182324 | 1331456 | CKLF-like MARVEL transmembrane domain containing 3   | Cmtm3  | 291813 | 1,03 | down |
| 5737192 | 7182324 | 1331456 | CKLF-like MARVEL transmembrane domain containing 3   | Cmtm3  | 291813 | 2,40 | down |
| 5880215 | 7182324 | 1331462 | CKLF-like MARVEL transmembrane domain containing 3   | Cmtm3  | 291813 | 1,03 | up   |
| 6014848 | 7182324 | 1331459 | CKLF-like MARVEL transmembrane domain containing 3   | Cmtm3  | 291813 | 1,04 | up   |
| 6015832 | 7182324 | 1331461 | CKLF-like MARVEL transmembrane domain containing 3   | Cmtm3  | 291813 | 1,19 | down |
| 6050493 | 7182324 | 1331463 | CKLF-like MARVEL transmembrane domain containing 3   | Cmtm3  | 291813 | 1,22 | down |
| 6195208 | 7182324 | 1331457 | CKLF-like MARVEL transmembrane domain containing 3   | Cmtm3  | 291813 | 1,09 | down |
| 6646858 | 7182324 | 1331457 | CKLF-like MARVEL transmembrane domain containing 3   | Cmtm3  | 291813 | 1,12 | up   |
| 6677064 | 7182324 | 1331456 | CKLF-like MARVEL transmembrane domain containing 3   | Cmtm3  | 291813 | 1,71 | down |
| 6681901 | 7182324 | 1331460 | CKLF-like MARVEL transmembrane domain containing 3   | Cmtm3  | 291813 | 1,06 | up   |
| 5642891 | 7279555 | 1571960 | claspin homolog (Xenopus laevis)                     | Clspn  | 298534 | 1,11 | up   |
| 5717286 | 7279555 | 1571975 | claspin homolog (Xenopus laevis)                     | Clspn  | 298534 | 2,50 | down |
| 5798633 | 7279555 | 1571955 | claspin homolog (Xenopus laevis)                     | Clspn  | 298534 | 1,08 | up   |
| 5816551 | 7279555 | 1571974 | claspin homolog (Xenopus laevis)                     | Clspn  | 298534 | 1,38 | down |
| 5835927 | 7279555 | 1571964 | claspin homolog (Xenopus laevis)                     | Clspn  | 298534 | 1,24 | up   |
| 5869050 | 7279555 | 1571974 | claspin homolog (Xenopus laevis)                     | Clspn  | 298534 | 1,16 | down |
| 5879254 | 7279555 | 1571959 | claspin homolog (Xenopus laevis)                     | Clspn  | 298534 | 1,11 | down |
| 5943357 | 7279555 | 1571963 | claspin homolog (Xenopus laevis)                     | Clspn  | 298534 | 1,06 | down |
| 6021023 | 7279555 | 1571969 | claspin homolog (Xenopus laevis)                     | Clspn  | 298534 | 1,34 | down |
| 6025847 | 7279555 | 1571947 | claspin homolog (Xenopus laevis)                     | Clspn  | 298534 | 1,26 | up   |
| 6046993 | 7279555 | 1571965 | claspin homolog (Xenopus laevis)                     | Clspn  | 298534 | 1,14 | up   |
| 6047412 | 7279555 | 1571954 | claspin homolog (Xenopus laevis)                     | Clspn  | 298534 | 1,11 | down |
| 6067088 | 7279555 | 1571966 | claspin homolog (Xenopus laevis)                     | Clspn  | 298534 | 1,15 | up   |
| 6102706 | 7279555 | 1571949 | claspin homolog (Xenopus laevis)                     | Clspn  | 298534 | 1,02 | down |
| 6126810 | 7279555 | 1571949 | claspin homolog (Xenopus laevis)                     | Clspn  | 298534 | 1,05 | up   |
| 6136218 | 7279555 | 1571958 | claspin homolog (Xenopus laevis)                     | Clspn  | 298534 | 1,08 | up   |
| 6167080 | 7279555 | 1571976 | claspin homolog (Xenopus laevis)                     | Clspn  | 298534 | 1,67 | up   |
| 6259742 | 7279555 | 1571963 | claspin homolog (Xenopus laevis)                     | Clspn  | 298534 | 1,12 | down |
| 6301642 | 7279555 | 1571962 | claspin homolog (Xenopus laevis)                     | Clspn  | 298534 | 1,34 | down |
| 6307425 | 7279555 | 1571961 | claspin homolog (Xenopus laevis)                     | Clspn  | 298534 | 1,52 | down |
| 6325094 | 7279555 | 1571970 | claspin homolog (Xenopus laevis)                     | Clspn  | 298534 | 1,03 | down |
| 6360818 | 7279555 | 1571948 | claspin homolog (Xenopus laevis)                     | Clspn  | 298534 | 1,59 | down |
| 6374144 | 7279555 | 1571946 | claspin homolog (Xenopus laevis)                     | Clspn  | 298534 | 1,04 | down |
| 6396493 | 7279555 | 1571972 | claspin homolog (Xenopus laevis)                     | Clspn  | 298534 | 1,40 | down |
| 6419348 | 7279555 | 1571957 | claspin homolog (Xenopus laevis)                     | Clspn  | 298534 | 1,02 | down |
| 6437941 | 7279555 | 1571959 | claspin homolog (Xenopus laevis)                     | Clspn  | 298534 | 1,07 | up   |
| 6497955 | 7279555 | 1571956 | claspin homolog (Xenopus laevis)                     | Clspn  | 298534 | 1,03 | up   |
| 6561130 | 7279555 | 1571971 | claspin homolog (Xenopus laevis)                     | Clspn  | 298534 | 1,17 | down |
| 6600727 | 7279555 | 1571968 | claspin homolog (Xenopus laevis)                     | Clspn  | 298534 | 1,18 | down |
| 6628181 | 7279555 | 1571973 | claspin homolog (Xenopus laevis)                     | Clspn  | 298534 | 1,13 | up   |
| 6735991 | 7279555 | 1571967 | claspin homolog (Xenopus laevis)                     | Clspn  | 298534 | 1,94 | up   |
| 5698272 | 7146166 | 1241166 | claudin 23                                           | Cldn23 | 290789 | 1,07 | down |
| 5943707 | 7146166 | 1241166 | claudin 23                                           | Cldn23 | 290789 | 1,24 | down |
| 5958595 | 7146166 | 1241167 | claudin 23                                           | Cldn23 | 290789 | 1,14 | up   |
| 5973584 | 7146166 | 1241166 | claudin 23                                           | Cldn23 | 290789 | 1,20 | up   |
| 6024225 | 7146166 | 1241166 | claudin 23                                           | Cldn23 | 290789 | 1,44 | down |
| 6103451 | 7146166 | 1241166 | claudin 23                                           | Cldn23 | 290789 | 2,38 | down |
| 6243606 | 7146166 | 1241166 | claudin 23                                           | Cldn23 | 290789 | 1,08 | down |
| 5781789 | 7065357 | 1044743 | claudin 6                                            | Cldn6  | 287098 | 1,12 | up   |
| 6281573 | 7065357 | 1044742 | claudin 6                                            | Cldn6  | 287098 | 2,43 | up   |
| 5673717 | 7232438 | 1453833 | c-mer proto-oncogene tyrosine kinase                 | Mertk  | 65037  | 1,26 | up   |
| 5797460 | 7232438 | 1453838 | c-mer proto-oncogene tyrosine kinase                 | Mertk  | 65037  | 1,09 | down |
| 5856009 | 7232438 | 1453827 | c-mer proto-oncogene tyrosine kinase                 | Mertk  | 65037  | 1,15 | down |
| 5872807 | 7232438 | 1453835 | c-mer proto-oncogene tyrosine kinase                 | Mertk  | 65037  | 2,87 | up   |



|         |         |         |                                                 |        |        |      |      |
|---------|---------|---------|-------------------------------------------------|--------|--------|------|------|
| 6019240 | 7232438 | 1453832 | c-mer proto-oncogene tyrosine kinase            | Mertk  | 65037  | 1,28 | up   |
| 6048863 | 7232438 | 1453826 | c-mer proto-oncogene tyrosine kinase            | Mertk  | 65037  | 1,30 | down |
| 6054021 | 7232438 | 1453842 | c-mer proto-oncogene tyrosine kinase            | Mertk  | 65037  | 1,23 | up   |
| 6070912 | 7232438 | 1453839 | c-mer proto-oncogene tyrosine kinase            | Mertk  | 65037  | 1,21 | up   |
| 6181307 | 7232438 | 1453837 | c-mer proto-oncogene tyrosine kinase            | Mertk  | 65037  | 1,03 | down |
| 6185525 | 7232438 | 1453826 | c-mer proto-oncogene tyrosine kinase            | Mertk  | 65037  | 1,85 | up   |
| 6201762 | 7232438 | 1453834 | c-mer proto-oncogene tyrosine kinase            | Mertk  | 65037  | 1,61 | down |
| 6217164 | 7232438 | 1453836 | c-mer proto-oncogene tyrosine kinase            | Mertk  | 65037  | 1,04 | down |
| 6340605 | 7232438 | 1453843 | c-mer proto-oncogene tyrosine kinase            | Mertk  | 65037  | 1,93 | up   |
| 6373052 | 7232438 | 1453830 | c-mer proto-oncogene tyrosine kinase            | Mertk  | 65037  | 1,01 | down |
| 6384308 | 7232438 | 1453841 | c-mer proto-oncogene tyrosine kinase            | Mertk  | 65037  | 1,21 | down |
| 6438120 | 7232438 | 1453829 | c-mer proto-oncogene tyrosine kinase            | Mertk  | 65037  | 1,01 | down |
| 6491177 | 7232438 | 1453828 | c-mer proto-oncogene tyrosine kinase            | Mertk  | 65037  | 1,14 | down |
| 6511534 | 7232438 | 1453831 | c-mer proto-oncogene tyrosine kinase            | Mertk  | 65037  | 1,03 | up   |
| 6577201 | 7232438 | 1453827 | c-mer proto-oncogene tyrosine kinase            | Mertk  | 65037  | 1,29 | down |
| 6637769 | 7232438 | 1453825 | c-mer proto-oncogene tyrosine kinase            | Mertk  | 65037  | 1,03 | up   |
| 6733148 | 7232438 | 1453840 | c-mer proto-oncogene tyrosine kinase            | Mertk  | 65037  | 1,12 | up   |
| 5639163 | 7045969 | 1000820 | Cnksr family member 3                           | Cnksr3 | 308113 | 1,24 | up   |
| 5651708 | 7045969 | 1000815 | Cnksr family member 3                           | Cnksr3 | 308113 | 1,06 | up   |
| 5660297 | 7045969 | 1000818 | Cnksr family member 3                           | Cnksr3 | 308113 | 4,08 | down |
| 5682846 | 7045969 | 1000814 | Cnksr family member 3                           | Cnksr3 | 308113 | 1,33 | down |
| 5712743 | 7045969 | 1000821 | Cnksr family member 3                           | Cnksr3 | 308113 | 1,51 | up   |
| 5911839 | 7045969 | 1000815 | Cnksr family member 3                           | Cnksr3 | 308113 | 1,23 | down |
| 5948580 | 7045969 | 1000814 | Cnksr family member 3                           | Cnksr3 | 308113 | 1,15 | up   |
| 5978456 | 7045969 | 1000814 | Cnksr family member 3                           | Cnksr3 | 308113 | 1,38 | up   |
| 5999553 | 7045969 | 1000824 | Cnksr family member 3                           | Cnksr3 | 308113 | 1,97 | up   |
| 6029543 | 7045969 | 1000817 | Cnksr family member 3                           | Cnksr3 | 308113 | 1,53 | up   |
| 6039562 | 7045969 | 1000815 | Cnksr family member 3                           | Cnksr3 | 308113 | 1,72 | down |
| 6064549 | 7045969 | 1000822 | Cnksr family member 3                           | Cnksr3 | 308113 | 1,18 | up   |
| 6146931 | 7045969 | 1000816 | Cnksr family member 3                           | Cnksr3 | 308113 | 2,28 | down |
| 6291698 | 7045969 | 1000826 | Cnksr family member 3                           | Cnksr3 | 308113 | 1,05 | down |
| 6297040 | 7045969 | 1000814 | Cnksr family member 3                           | Cnksr3 | 308113 | 2,11 | down |
| 6460948 | 7045969 | 1000825 | Cnksr family member 3                           | Cnksr3 | 308113 | 1,40 | up   |
| 6498962 | 7045969 | 1000819 | Cnksr family member 3                           | Cnksr3 | 308113 | 1,09 | up   |
| 6518141 | 7045969 | 1000823 | Cnksr family member 3                           | Cnksr3 | 308113 | 1,10 | down |
| 6586857 | 7045969 | 1000818 | Cnksr family member 3                           | Cnksr3 | 308113 | 2,22 | down |
| 6681465 | 7045969 | 1000816 | Cnksr family member 3                           | Cnksr3 | 308113 | 1,02 | up   |
| 5647390 | 7167700 | 1293596 | coagulation factor VIII, procoagulant component | F8     | 302470 | 2,07 | down |
| 5659223 | 7167700 | 1293604 | coagulation factor VIII, procoagulant component | F8     | 302470 | 1,07 | down |
| 5661114 | 7167700 | 1293598 | coagulation factor VIII, procoagulant component | F8     | 302470 | 1,04 | up   |
| 5694102 | 7167700 | 1293609 | coagulation factor VIII, procoagulant component | F8     | 302470 | 1,68 | up   |
| 5705127 | 7167700 | 1293605 | coagulation factor VIII, procoagulant component | F8     | 302470 | 1,38 | down |
| 5707144 | 7167700 | 1293617 | coagulation factor VIII, procoagulant component | F8     | 302470 | 1,20 | up   |
| 5720970 | 7167700 | 1293592 | coagulation factor VIII, procoagulant component | F8     | 302470 | 1,08 | down |
| 5729005 | 7167700 | 1293604 | coagulation factor VIII, procoagulant component | F8     | 302470 | 1,49 | up   |
| 5814124 | 7167700 | 1293616 | coagulation factor VIII, procoagulant component | F8     | 302470 | 1,18 | up   |
| 5823923 | 7167700 | 1293594 | coagulation factor VIII, procoagulant component | F8     | 302470 | 1,26 | up   |
| 5828649 | 7167700 | 1293610 | coagulation factor VIII, procoagulant component | F8     | 302470 | 1,10 | down |
| 5846618 | 7167700 | 1293614 | coagulation factor VIII, procoagulant component | F8     | 302470 | 1,20 | down |
| 5857873 | 7167700 | 1293599 | coagulation factor VIII, procoagulant component | F8     | 302470 | 1,22 | up   |
| 5885476 | 7167700 | 1293605 | coagulation factor VIII, procoagulant component | F8     | 302470 | 1,21 | up   |
| 5917742 | 7167700 | 1293608 | coagulation factor VIII, procoagulant component | F8     | 302470 | 1,94 | down |
| 5934716 | 7167700 | 1293593 | coagulation factor VIII, procoagulant component | F8     | 302470 | 1,19 | down |
| 5959906 | 7167700 | 1293604 | coagulation factor VIII, procoagulant component | F8     | 302470 | 1,46 | up   |
| 5963818 | 7167700 | 1293619 | coagulation factor VIII, procoagulant component | F8     | 302470 | 1,08 | down |
| 5972659 | 7167700 | 1293616 | coagulation factor VIII, procoagulant component | F8     | 302470 | 1,00 | up   |

|         |         |         |                                                                 |      |        |      |      |
|---------|---------|---------|-----------------------------------------------------------------|------|--------|------|------|
| 6006381 | 7167700 | 1293604 | coagulation factor VIII, procoagulant component                 | F8   | 302470 | 1,23 | up   |
| 6045915 | 7167700 | 1293613 | coagulation factor VIII, procoagulant component                 | F8   | 302470 | 1,05 | up   |
| 6089736 | 7167700 | 1293597 | coagulation factor VIII, procoagulant component                 | F8   | 302470 | 2,01 | up   |
| 6115704 | 7167700 | 1293600 | coagulation factor VIII, procoagulant component                 | F8   | 302470 | 1,00 | down |
| 6123930 | 7167700 | 1293595 | coagulation factor VIII, procoagulant component                 | F8   | 302470 | 1,20 | down |
| 6132513 | 7167700 | 1293598 | coagulation factor VIII, procoagulant component                 | F8   | 302470 | 1,11 | up   |
| 6133518 | 7167700 | 1293612 | coagulation factor VIII, procoagulant component                 | F8   | 302470 | 1,50 | down |
| 6146326 | 7167700 | 1293609 | coagulation factor VIII, procoagulant component                 | F8   | 302470 | 1,03 | up   |
| 6153048 | 7167700 | 1293596 | coagulation factor VIII, procoagulant component                 | F8   | 302470 | 1,02 | down |
| 6161399 | 7167700 | 1293604 | coagulation factor VIII, procoagulant component                 | F8   | 302470 | 1,09 | down |
| 6182905 | 7167700 | 1293604 | coagulation factor VIII, procoagulant component                 | F8   | 302470 | 1,16 | up   |
| 6193128 | 7167700 | 1293616 | coagulation factor VIII, procoagulant component                 | F8   | 302470 | 1,08 | up   |
| 6207162 | 7167700 | 1293606 | coagulation factor VIII, procoagulant component                 | F8   | 302470 | 1,09 | up   |
| 6231461 | 7167700 | 1293611 | coagulation factor VIII, procoagulant component                 | F8   | 302470 | 1,12 | down |
| 6247403 | 7167700 | 1293607 | coagulation factor VIII, procoagulant component                 | F8   | 302470 | 1,27 | up   |
| 6255430 | 7167700 | 1293592 | coagulation factor VIII, procoagulant component                 | F8   | 302470 | 1,05 | down |
| 6258792 | 7167700 | 1293593 | coagulation factor VIII, procoagulant component                 | F8   | 302470 | 1,07 | down |
| 6258969 | 7167700 | 1293618 | coagulation factor VIII, procoagulant component                 | F8   | 302470 | 1,19 | down |
| 6296549 | 7167700 | 1293608 | coagulation factor VIII, procoagulant component                 | F8   | 302470 | 1,00 | down |
| 6308684 | 7167700 | 1293603 | coagulation factor VIII, procoagulant component                 | F8   | 302470 | 1,03 | down |
| 6366714 | 7167700 | 1293604 | coagulation factor VIII, procoagulant component                 | F8   | 302470 | 1,12 | up   |
| 6368329 | 7167700 | 1293605 | coagulation factor VIII, procoagulant component                 | F8   | 302470 | 1,21 | up   |
| 6442559 | 7167700 | 1293597 | coagulation factor VIII, procoagulant component                 | F8   | 302470 | 1,05 | down |
| 6450091 | 7167700 | 1293604 | coagulation factor VIII, procoagulant component                 | F8   | 302470 | 1,69 | down |
| 6451701 | 7167700 | 1293596 | coagulation factor VIII, procoagulant component                 | F8   | 302470 | 1,08 | down |
| 6479765 | 7167700 | 1293605 | coagulation factor VIII, procoagulant component                 | F8   | 302470 | 1,68 | up   |
| 6571549 | 7167700 | 1293592 | coagulation factor VIII, procoagulant component                 | F8   | 302470 | 1,15 | up   |
| 6585775 | 7167700 | 1293604 | coagulation factor VIII, procoagulant component                 | F8   | 302470 | 1,26 | down |
| 6641811 | 7167700 | 1293615 | coagulation factor VIII, procoagulant component                 | F8   | 302470 | 1,18 | up   |
| 6713645 | 7167700 | 1293606 | coagulation factor VIII, procoagulant component                 | F8   | 302470 | 1,09 | up   |
| 6728029 | 7167700 | 1293605 | coagulation factor VIII, procoagulant component                 | F8   | 302470 | 1,08 | down |
| 6734642 | 7167700 | 1293597 | coagulation factor VIII, procoagulant component                 | F8   | 302470 | 1,47 | up   |
| 6737400 | 7167700 | 1293594 | coagulation factor VIII, procoagulant component                 | F8   | 302470 | 1,45 | up   |
| 6742748 | 7167700 | 1293601 | coagulation factor VIII, procoagulant component                 | F8   | 302470 | 1,37 | down |
| 5626989 | 7155531 | 1264509 | coagulation factor XII (Hageman factor)                         | F12  | 306761 | 1,12 | down |
| 5690230 | 7155531 | 1264520 | coagulation factor XII (Hageman factor)                         | F12  | 306761 | 1,30 | up   |
| 5717682 | 7155531 | 1264508 | coagulation factor XII (Hageman factor)                         | F12  | 306761 | 1,12 | down |
| 5802152 | 7155531 | 1264507 | coagulation factor XII (Hageman factor)                         | F12  | 306761 | 1,10 | up   |
| 5922060 | 7155531 | 1264508 | coagulation factor XII (Hageman factor)                         | F12  | 306761 | 1,25 | up   |
| 5948808 | 7155531 | 1264518 | coagulation factor XII (Hageman factor)                         | F12  | 306761 | 2,14 | down |
| 6016706 | 7155531 | 1264515 | coagulation factor XII (Hageman factor)                         | F12  | 306761 | 1,21 | up   |
| 6038678 | 7155531 | 1264511 | coagulation factor XII (Hageman factor)                         | F12  | 306761 | 1,25 | down |
| 6130517 | 7155531 | 1264513 | coagulation factor XII (Hageman factor)                         | F12  | 306761 | 1,33 | down |
| 6130715 | 7155531 | 1264519 | coagulation factor XII (Hageman factor)                         | F12  | 306761 | 1,41 | down |
| 6175011 | 7155531 | 1264510 | coagulation factor XII (Hageman factor)                         | F12  | 306761 | 1,33 | up   |
| 6225632 | 7155531 | 1264506 | coagulation factor XII (Hageman factor)                         | F12  | 306761 | 1,75 | down |
| 6395030 | 7155531 | 1264517 | coagulation factor XII (Hageman factor)                         | F12  | 306761 | 1,08 | down |
| 6435846 | 7155531 | 1264514 | coagulation factor XII (Hageman factor)                         | F12  | 306761 | 1,14 | up   |
| 6467779 | 7155531 | 1264506 | coagulation factor XII (Hageman factor)                         | F12  | 306761 | 1,53 | up   |
| 6600942 | 7155531 | 1264516 | coagulation factor XII (Hageman factor)                         | F12  | 306761 | 1,24 | up   |
| 6690527 | 7155531 | 1264516 | coagulation factor XII (Hageman factor)                         | F12  | 306761 | 1,11 | down |
| 6706960 | 7155531 | 1264512 | coagulation factor XII (Hageman factor)                         | F12  | 306761 | 1,07 | down |
| 5664636 | 7284380 | 1583483 | coenzyme Q3 homolog, methyltransferase ( <i>S. cerevisiae</i> ) | Coq3 | 29309  | 1,02 | up   |
| 5779303 | 7284380 | 1583485 | coenzyme Q3 homolog, methyltransferase ( <i>S. cerevisiae</i> ) | Coq3 | 29309  | 1,78 | down |
| 5811886 | 7284380 | 1583484 | coenzyme Q3 homolog, methyltransferase ( <i>S. cerevisiae</i> ) | Coq3 | 29309  | 2,05 | up   |
| 5930466 | 7284380 | 1583482 | coenzyme Q3 homolog, methyltransferase ( <i>S. cerevisiae</i> ) | Coq3 | 29309  | 1,02 | up   |

|         |         |         |                                                                 |         |        |      |      |
|---------|---------|---------|-----------------------------------------------------------------|---------|--------|------|------|
| 6070269 | 7284380 | 1583480 | coenzyme Q3 homolog, methyltransferase ( <i>S. cerevisiae</i> ) | Coq3    | 29309  | 1,05 | down |
| 6077791 | 7284380 | 1583483 | coenzyme Q3 homolog, methyltransferase ( <i>S. cerevisiae</i> ) | Coq3    | 29309  | 1,27 | down |
| 6385506 | 7284380 | 1583481 | coenzyme Q3 homolog, methyltransferase ( <i>S. cerevisiae</i> ) | Coq3    | 29309  | 1,01 | up   |
| 6476504 | 7284380 | 1583480 | coenzyme Q3 homolog, methyltransferase ( <i>S. cerevisiae</i> ) | Coq3    | 29309  | 1,16 | down |
| 5691761 | 7179870 | 1324640 | coiled-coil and C2 domain containing 1A                         | Ce2d1a  | 288908 | 1,51 | down |
| 5706018 | 7179870 | 1324650 | coiled-coil and C2 domain containing 1A                         | Ce2d1a  | 288908 | 1,02 | down |
| 5722739 | 7179870 | 1324644 | coiled-coil and C2 domain containing 1A                         | Ce2d1a  | 288908 | 1,12 | down |
| 5730213 | 7179870 | 1324641 | coiled-coil and C2 domain containing 1A                         | Ce2d1a  | 288908 | 1,10 | down |
| 5739347 | 7179870 | 1324643 | coiled-coil and C2 domain containing 1A                         | Ce2d1a  | 288908 | 2,05 | up   |
| 5805675 | 7179870 | 1324633 | coiled-coil and C2 domain containing 1A                         | Ce2d1a  | 288908 | 1,01 | up   |
| 5881509 | 7179870 | 1324632 | coiled-coil and C2 domain containing 1A                         | Ce2d1a  | 288908 | 1,13 | up   |
| 5910607 | 7179870 | 1324655 | coiled-coil and C2 domain containing 1A                         | Ce2d1a  | 288908 | 1,17 | up   |
| 5921915 | 7179870 | 1324634 | coiled-coil and C2 domain containing 1A                         | Ce2d1a  | 288908 | 1,13 | up   |
| 5930250 | 7179870 | 1324636 | coiled-coil and C2 domain containing 1A                         | Ce2d1a  | 288908 | 1,17 | down |
| 5979388 | 7179870 | 1324653 | coiled-coil and C2 domain containing 1A                         | Ce2d1a  | 288908 | 1,02 | up   |
| 6014020 | 7179870 | 1324651 | coiled-coil and C2 domain containing 1A                         | Ce2d1a  | 288908 | 1,12 | down |
| 6020834 | 7179870 | 1324637 | coiled-coil and C2 domain containing 1A                         | Ce2d1a  | 288908 | 1,01 | down |
| 6028636 | 7179870 | 1324635 | coiled-coil and C2 domain containing 1A                         | Ce2d1a  | 288908 | 1,01 | down |
| 6097905 | 7179870 | 1324630 | coiled-coil and C2 domain containing 1A                         | Ce2d1a  | 288908 | 1,04 | up   |
| 6122932 | 7179870 | 1324638 | coiled-coil and C2 domain containing 1A                         | Ce2d1a  | 288908 | 1,17 | down |
| 6150849 | 7179870 | 1324631 | coiled-coil and C2 domain containing 1A                         | Ce2d1a  | 288908 | 1,12 | up   |
| 6176685 | 7179870 | 1324657 | coiled-coil and C2 domain containing 1A                         | Ce2d1a  | 288908 | 1,20 | down |
| 6190333 | 7179870 | 1324647 | coiled-coil and C2 domain containing 1A                         | Ce2d1a  | 288908 | 1,22 | down |
| 6225823 | 7179870 | 1324639 | coiled-coil and C2 domain containing 1A                         | Ce2d1a  | 288908 | 1,07 | down |
| 6271141 | 7179870 | 1324648 | coiled-coil and C2 domain containing 1A                         | Ce2d1a  | 288908 | 1,36 | down |
| 6317183 | 7179870 | 1324656 | coiled-coil and C2 domain containing 1A                         | Ce2d1a  | 288908 | 1,13 | down |
| 6397660 | 7179870 | 1324654 | coiled-coil and C2 domain containing 1A                         | Ce2d1a  | 288908 | 1,36 | up   |
| 6459024 | 7179870 | 1324642 | coiled-coil and C2 domain containing 1A                         | Ce2d1a  | 288908 | 1,17 | down |
| 6459779 | 7179870 | 1324635 | coiled-coil and C2 domain containing 1A                         | Ce2d1a  | 288908 | 1,01 | down |
| 6469708 | 7179870 | 1324634 | coiled-coil and C2 domain containing 1A                         | Ce2d1a  | 288908 | 1,09 | up   |
| 6498782 | 7179870 | 1324646 | coiled-coil and C2 domain containing 1A                         | Ce2d1a  | 288908 | 1,03 | down |
| 6537597 | 7179870 | 1324631 | coiled-coil and C2 domain containing 1A                         | Ce2d1a  | 288908 | 1,03 | up   |
| 6597615 | 7179870 | 1324649 | coiled-coil and C2 domain containing 1A                         | Ce2d1a  | 288908 | 1,69 | down |
| 6706715 | 7179870 | 1324652 | coiled-coil and C2 domain containing 1A                         | Ce2d1a  | 288908 | 1,17 | up   |
| 6725250 | 7179870 | 1324645 | coiled-coil and C2 domain containing 1A                         | Ce2d1a  | 288908 | 1,18 | up   |
| 5630429 | 7188909 | 1346798 | coiled-coil domain containing 125                               | Ccdc125 | 499518 | 1,16 | down |
| 5735793 | 7188909 | 1346801 | coiled-coil domain containing 125                               | Ccdc125 | 499518 | 2,21 | down |
| 5745817 | 7188909 | 1346812 | coiled-coil domain containing 125                               | Ccdc125 | 499518 | 1,08 | up   |
| 5759073 | 7188909 | 1346799 | coiled-coil domain containing 125                               | Ccdc125 | 499518 | 1,47 | up   |
| 5838751 | 7188909 | 1346804 | coiled-coil domain containing 125                               | Ccdc125 | 499518 | 1,15 | up   |
| 5963998 | 7188909 | 1346798 | coiled-coil domain containing 125                               | Ccdc125 | 499518 | 1,08 | up   |
| 6026515 | 7188909 | 1346798 | coiled-coil domain containing 125                               | Ccdc125 | 499518 | 1,10 | down |
| 6294785 | 7188909 | 1346809 | coiled-coil domain containing 125                               | Ccdc125 | 499518 | 1,10 | down |
| 6303625 | 7188909 | 1346808 | coiled-coil domain containing 125                               | Ccdc125 | 499518 | 1,01 | down |
| 6442056 | 7188909 | 1346811 | coiled-coil domain containing 125                               | Ccdc125 | 499518 | 1,49 | down |
| 6588188 | 7188909 | 1346812 | coiled-coil domain containing 125                               | Ccdc125 | 499518 | 1,02 | up   |
| 6650330 | 7188909 | 1346806 | coiled-coil domain containing 125                               | Ccdc125 | 499518 | 1,11 | up   |
| 6667899 | 7188909 | 1346803 | coiled-coil domain containing 125                               | Ccdc125 | 499518 | 1,18 | up   |
| 6680016 | 7188909 | 1346801 | coiled-coil domain containing 125                               | Ccdc125 | 499518 | 1,03 | down |
| 5801792 | 7254088 | 1507735 | coiled-coil domain containing 129                               | Ccdc129 | 500139 | 1,04 | up   |
| 6155414 | 7254088 | 1507750 | coiled-coil domain containing 129                               | Ccdc129 | 500139 | 1,21 | down |
| 6202274 | 7254088 | 1507747 | coiled-coil domain containing 129                               | Ccdc129 | 500139 | 1,08 | down |
| 6242741 | 7254088 | 1507734 | coiled-coil domain containing 129                               | Ccdc129 | 500139 | 1,05 | down |
| 6256195 | 7254088 | 1507738 | coiled-coil domain containing 129                               | Ccdc129 | 500139 | 1,00 | down |
| 6401653 | 7254088 | 1507736 | coiled-coil domain containing 129                               | Ccdc129 | 500139 | 1,04 | down |
| 6430668 | 7254088 | 1507749 | coiled-coil domain containing 129                               | Ccdc129 | 500139 | 1,33 | up   |

|         |         |         |                                   |         |        |      |      |
|---------|---------|---------|-----------------------------------|---------|--------|------|------|
| 6512180 | 7254088 | 1507750 | coiled-coil domain containing 129 | Ccdc129 | 500139 | 1,68 | up   |
| 6585919 | 7254088 | 1507747 | coiled-coil domain containing 129 | Ccdc129 | 500139 | 1,14 | down |
| 6588711 | 7254088 | 1507747 | coiled-coil domain containing 129 | Ccdc129 | 500139 | 1,02 | down |
| 6711695 | 7254088 | 1507750 | coiled-coil domain containing 129 | Ccdc129 | 500139 | 2,22 | up   |
| 6736703 | 7254088 | 1507748 | coiled-coil domain containing 129 | Ccdc129 | 500139 | 1,00 | up   |
| 5675738 | 7319219 | 1670298 | coiled-coil domain containing 134 | Ccdc134 | 500909 | 1,18 | up   |
| 5887684 | 7319219 | 1670302 | coiled-coil domain containing 134 | Ccdc134 | 500909 | 1,20 | down |
| 5949010 | 7319219 | 1670303 | coiled-coil domain containing 134 | Ccdc134 | 500909 | 1,59 | up   |
| 6034779 | 7319219 | 1670300 | coiled-coil domain containing 134 | Ccdc134 | 500909 | 1,24 | up   |
| 6125673 | 7319219 | 1670297 | coiled-coil domain containing 134 | Ccdc134 | 500909 | 1,20 | down |
| 6249333 | 7319219 | 1670301 | coiled-coil domain containing 134 | Ccdc134 | 500909 | 1,03 | down |
| 6437372 | 7319219 | 1670302 | coiled-coil domain containing 134 | Ccdc134 | 500909 | 2,00 | down |
| 6464633 | 7319219 | 1670296 | coiled-coil domain containing 134 | Ccdc134 | 500909 | 1,05 | up   |
| 6601721 | 7319219 | 1670299 | coiled-coil domain containing 134 | Ccdc134 | 500909 | 1,01 | down |
| 5879549 | 7344190 | 1730601 | coiled-coil domain containing 15  | Ccdc15  | 367056 | 1,13 | up   |
| 6023189 | 7344190 | 1730602 | coiled-coil domain containing 15  | Ccdc15  | 367056 | 1,20 | down |
| 6027868 | 7344190 | 1730616 | coiled-coil domain containing 15  | Ccdc15  | 367056 | 2,07 | down |
| 6041264 | 7344190 | 1730608 | coiled-coil domain containing 15  | Ccdc15  | 367056 | 1,00 | down |
| 6199212 | 7344190 | 1730610 | coiled-coil domain containing 15  | Ccdc15  | 367056 | 1,26 | down |
| 6286596 | 7344190 | 1730606 | coiled-coil domain containing 15  | Ccdc15  | 367056 | 1,01 | up   |
| 6539530 | 7344190 | 1730610 | coiled-coil domain containing 15  | Ccdc15  | 367056 | 1,04 | down |
| 6679556 | 7344190 | 1730617 | coiled-coil domain containing 15  | Ccdc15  | 367056 | 1,14 | up   |
| 6682721 | 7344190 | 1730599 | coiled-coil domain containing 15  | Ccdc15  | 367056 | 1,19 | up   |
| 6705368 | 7344190 | 1730615 | coiled-coil domain containing 15  | Ccdc15  | 367056 | 1,46 | up   |
| 6745691 | 7344190 | 1730609 | coiled-coil domain containing 15  | Ccdc15  | 367056 | 1,26 | down |
| 5669884 | 7335447 | 1708166 | coiled-coil domain containing 153 | Ccdc153 | 300663 | 1,17 | down |
| 5692749 | 7335447 | 1708161 | coiled-coil domain containing 153 | Ccdc153 | 300663 | 1,43 | down |
| 5995100 | 7335447 | 1708168 | coiled-coil domain containing 153 | Ccdc153 | 300663 | 1,37 | down |
| 6212839 | 7335447 | 1708167 | coiled-coil domain containing 153 | Ccdc153 | 300663 | 1,01 | up   |
| 6429575 | 7335447 | 1708167 | coiled-coil domain containing 153 | Ccdc153 | 300663 | 1,08 | down |
| 6454907 | 7335447 | 1708162 | coiled-coil domain containing 153 | Ccdc153 | 300663 | 2,09 | up   |
| 6498190 | 7335447 | 1708163 | coiled-coil domain containing 153 | Ccdc153 | 300663 | 1,10 | up   |
| 6576526 | 7335447 | 1708165 | coiled-coil domain containing 153 | Ccdc153 | 300663 | 1,11 | up   |
| 6667007 | 7335447 | 1708164 | coiled-coil domain containing 153 | Ccdc153 | 300663 | 1,10 | up   |
| 5619165 | 7373732 | 1805974 | coiled-coil domain containing 22  | Ccdc22  | 317381 | 1,30 | up   |
| 5625516 | 7373732 | 1805968 | coiled-coil domain containing 22  | Ccdc22  | 317381 | 1,30 | up   |
| 5981312 | 7373732 | 1805979 | coiled-coil domain containing 22  | Ccdc22  | 317381 | 1,01 | up   |
| 5982305 | 7373732 | 1805969 | coiled-coil domain containing 22  | Ccdc22  | 317381 | 1,10 | down |
| 6014062 | 7373732 | 1805970 | coiled-coil domain containing 22  | Ccdc22  | 317381 | 1,25 | down |
| 6052550 | 7373732 | 1805977 | coiled-coil domain containing 22  | Ccdc22  | 317381 | 1,16 | up   |
| 6241960 | 7373732 | 1805980 | coiled-coil domain containing 22  | Ccdc22  | 317381 | 1,35 | down |
| 6250180 | 7373732 | 1805973 | coiled-coil domain containing 22  | Ccdc22  | 317381 | 1,72 | down |
| 6276598 | 7373732 | 1805976 | coiled-coil domain containing 22  | Ccdc22  | 317381 | 1,23 | up   |
| 6371239 | 7373732 | 1805978 | coiled-coil domain containing 22  | Ccdc22  | 317381 | 1,48 | up   |
| 6404615 | 7373732 | 1805966 | coiled-coil domain containing 22  | Ccdc22  | 317381 | 1,03 | up   |
| 6460708 | 7373732 | 1805975 | coiled-coil domain containing 22  | Ccdc22  | 317381 | 1,44 | up   |
| 6464033 | 7373732 | 1805965 | coiled-coil domain containing 22  | Ccdc22  | 317381 | 1,07 | up   |
| 6468018 | 7373732 | 1805969 | coiled-coil domain containing 22  | Ccdc22  | 317381 | 1,20 | up   |
| 6477660 | 7373732 | 1805971 | coiled-coil domain containing 22  | Ccdc22  | 317381 | 1,81 | down |
| 6479885 | 7373732 | 1805974 | coiled-coil domain containing 22  | Ccdc22  | 317381 | 1,07 | up   |
| 6525181 | 7373732 | 1805974 | coiled-coil domain containing 22  | Ccdc22  | 317381 | 1,04 | up   |
| 6625590 | 7373732 | 1805980 | coiled-coil domain containing 22  | Ccdc22  | 317381 | 2,58 | down |
| 6672073 | 7373732 | 1805969 | coiled-coil domain containing 22  | Ccdc22  | 317381 | 1,27 | down |
| 5683092 | 7313913 | 1656888 | coiled-coil domain containing 41  | Ccdc41  | 366872 | 1,09 | up   |
| 5737372 | 7313913 | 1656884 | coiled-coil domain containing 41  | Ccdc41  | 366872 | 1,21 | up   |
| 5819212 | 7313913 | 1656895 | coiled-coil domain containing 41  | Ccdc41  | 366872 | 1,23 | down |

|         |         |         |                                   |         |        |      |      |
|---------|---------|---------|-----------------------------------|---------|--------|------|------|
| 5852812 | 7313913 | 1656895 | coiled-coil domain containing 41  | Ccdc41  | 366872 | 1,33 | down |
| 5876490 | 7313913 | 1656886 | coiled-coil domain containing 41  | Ccdc41  | 366872 | 2,59 | up   |
| 5916266 | 7313913 | 1656892 | coiled-coil domain containing 41  | Ccdc41  | 366872 | 1,64 | down |
| 5977325 | 7313913 | 1656887 | coiled-coil domain containing 41  | Ccdc41  | 366872 | 1,42 | up   |
| 5980948 | 7313913 | 1656894 | coiled-coil domain containing 41  | Ccdc41  | 366872 | 1,15 | down |
| 6045092 | 7313913 | 1656881 | coiled-coil domain containing 41  | Ccdc41  | 366872 | 1,04 | up   |
| 6173794 | 7313913 | 1656883 | coiled-coil domain containing 41  | Ccdc41  | 366872 | 1,35 | up   |
| 6222089 | 7313913 | 1656893 | coiled-coil domain containing 41  | Ccdc41  | 366872 | 1,17 | up   |
| 6292058 | 7313913 | 1656880 | coiled-coil domain containing 41  | Ccdc41  | 366872 | 1,66 | up   |
| 6347034 | 7313913 | 1656889 | coiled-coil domain containing 41  | Ccdc41  | 366872 | 2,55 | down |
| 6412129 | 7313913 | 1656882 | coiled-coil domain containing 41  | Ccdc41  | 366872 | 1,65 | down |
| 6418011 | 7313913 | 1656896 | coiled-coil domain containing 41  | Ccdc41  | 366872 | 1,04 | up   |
| 6424571 | 7313913 | 1656885 | coiled-coil domain containing 41  | Ccdc41  | 366872 | 1,12 | down |
| 6429648 | 7313913 | 1656891 | coiled-coil domain containing 41  | Ccdc41  | 366872 | 1,60 | down |
| 6486802 | 7313913 | 1656890 | coiled-coil domain containing 41  | Ccdc41  | 366872 | 1,12 | down |
| 6615220 | 7313913 | 1656891 | coiled-coil domain containing 41  | Ccdc41  | 366872 | 1,09 | up   |
| 6718167 | 7313913 | 1656885 | coiled-coil domain containing 41  | Ccdc41  | 366872 | 1,33 | up   |
| 5651472 | 7098867 | 1124933 | coiled-coil domain containing 64  | Ccdc64  | 304537 | 1,39 | up   |
| 6117779 | 7098867 | 1124956 | coiled-coil domain containing 64  | Ccdc64  | 304537 | 1,09 | up   |
| 6316201 | 7098867 | 1124933 | coiled-coil domain containing 64  | Ccdc64  | 304537 | 1,66 | down |
| 6469336 | 7098867 | 1124962 | coiled-coil domain containing 64  | Ccdc64  | 304537 | 1,01 | up   |
| 6482610 | 7098867 | 1124929 | coiled-coil domain containing 64  | Ccdc64  | 304537 | 1,05 | down |
| 6490389 | 7098867 | 1124962 | coiled-coil domain containing 64  | Ccdc64  | 304537 | 2,86 | up   |
| 6612899 | 7098867 | 1124959 | coiled-coil domain containing 64  | Ccdc64  | 304537 | 1,16 | up   |
| 6693090 | 7098867 | 1124946 | coiled-coil domain containing 64  | Ccdc64  | 304537 | 1,11 | up   |
| 6746728 | 7098867 | 1124946 | coiled-coil domain containing 64  | Ccdc64  | 304537 | 1,21 | down |
| 5668858 | 7059970 | 1031450 | coiled-coil domain containing 88B | Ccdc88b | 361715 | 1,27 | up   |
| 5825786 | 7059970 | 1031442 | coiled-coil domain containing 88B | Ccdc88b | 361715 | 1,53 | up   |
| 5833913 | 7059970 | 1031449 | coiled-coil domain containing 88B | Ccdc88b | 361715 | 1,17 | down |
| 5863635 | 7059970 | 1031449 | coiled-coil domain containing 88B | Ccdc88b | 361715 | 1,13 | down |
| 5896790 | 7059970 | 1031444 | coiled-coil domain containing 88B | Ccdc88b | 361715 | 1,32 | down |
| 6061694 | 7059970 | 1031457 | coiled-coil domain containing 88B | Ccdc88b | 361715 | 1,19 | up   |
| 6101582 | 7059970 | 1031448 | coiled-coil domain containing 88B | Ccdc88b | 361715 | 1,07 | up   |
| 6158057 | 7059970 | 1031446 | coiled-coil domain containing 88B | Ccdc88b | 361715 | 1,10 | up   |
| 6210893 | 7059970 | 1031458 | coiled-coil domain containing 88B | Ccdc88b | 361715 | 1,18 | up   |
| 6219779 | 7059970 | 1031456 | coiled-coil domain containing 88B | Ccdc88b | 361715 | 1,46 | up   |
| 6222653 | 7059970 | 1031442 | coiled-coil domain containing 88B | Ccdc88b | 361715 | 1,27 | up   |
| 6243418 | 7059970 | 1031443 | coiled-coil domain containing 88B | Ccdc88b | 361715 | 1,05 | up   |
| 6243610 | 7059970 | 1031455 | coiled-coil domain containing 88B | Ccdc88b | 361715 | 1,11 | up   |
| 6305628 | 7059970 | 1031442 | coiled-coil domain containing 88B | Ccdc88b | 361715 | 1,03 | up   |
| 6338176 | 7059970 | 1031445 | coiled-coil domain containing 88B | Ccdc88b | 361715 | 1,22 | up   |
| 6445726 | 7059970 | 1031447 | coiled-coil domain containing 88B | Ccdc88b | 361715 | 1,24 | down |
| 6483750 | 7059970 | 1031444 | coiled-coil domain containing 88B | Ccdc88b | 361715 | 1,10 | up   |
| 6567247 | 7059970 | 1031450 | coiled-coil domain containing 88B | Ccdc88b | 361715 | 1,17 | down |
| 6576816 | 7059970 | 1031454 | coiled-coil domain containing 88B | Ccdc88b | 361715 | 1,09 | down |
| 6633022 | 7059970 | 1031452 | coiled-coil domain containing 88B | Ccdc88b | 361715 | 2,12 | down |
| 6684500 | 7059970 | 1031453 | coiled-coil domain containing 88B | Ccdc88b | 361715 | 1,13 | up   |
| 6169425 | 7156372 | 1266715 | coiled-coil domain containing 90A | Ccdc90a | 291034 | 1,15 | down |
| 5755616 | 7370475 | 1797140 | coiled-coil domain containing 94  | Ccdc94  | 501285 | 1,44 | down |
| 5892274 | 7370475 | 1797142 | coiled-coil domain containing 94  | Ccdc94  | 501285 | 1,14 | up   |
| 5948105 | 7370475 | 1797141 | coiled-coil domain containing 94  | Ccdc94  | 501285 | 1,02 | up   |
| 5999024 | 7370475 | 1797144 | coiled-coil domain containing 94  | Ccdc94  | 501285 | 1,31 | up   |
| 6147010 | 7370475 | 1797139 | coiled-coil domain containing 94  | Ccdc94  | 501285 | 1,00 | up   |
| 6605871 | 7370475 | 1797145 | coiled-coil domain containing 94  | Ccdc94  | 501285 | 1,24 | down |
| 6685981 | 7370475 | 1797143 | coiled-coil domain containing 94  | Ccdc94  | 501285 | 1,46 | up   |
| 6703717 | 7370475 | 1797138 | coiled-coil domain containing 94  | Ccdc94  | 501285 | 1,24 | up   |

|         |         |         |                            |         |       |      |      |
|---------|---------|---------|----------------------------|---------|-------|------|------|
| 5682275 | 7250799 | 1499353 | collagen, type I, alpha 2  | Coll1a2 | 84352 | 1,73 | down |
| 5717853 | 7250799 | 1499382 | collagen, type I, alpha 2  | Coll1a2 | 84352 | 1,21 | down |
| 5725857 | 7250799 | 1499351 | collagen, type I, alpha 2  | Coll1a2 | 84352 | 1,15 | down |
| 5747353 | 7250799 | 1499369 | collagen, type I, alpha 2  | Coll1a2 | 84352 | 1,14 | up   |
| 5754202 | 7250799 | 1499359 | collagen, type I, alpha 2  | Coll1a2 | 84352 | 1,08 | up   |
| 5766976 | 7250799 | 1499358 | collagen, type I, alpha 2  | Coll1a2 | 84352 | 1,05 | up   |
| 5775382 | 7250799 | 1499379 | collagen, type I, alpha 2  | Coll1a2 | 84352 | 1,42 | down |
| 5781609 | 7250799 | 1499396 | collagen, type I, alpha 2  | Coll1a2 | 84352 | 1,19 | up   |
| 5787650 | 7250799 | 1499381 | collagen, type I, alpha 2  | Coll1a2 | 84352 | 1,33 | up   |
| 5811652 | 7250799 | 1499360 | collagen, type I, alpha 2  | Coll1a2 | 84352 | 1,33 | down |
| 5816252 | 7250799 | 1499397 | collagen, type I, alpha 2  | Coll1a2 | 84352 | 1,02 | down |
| 5819417 | 7250799 | 1499363 | collagen, type I, alpha 2  | Coll1a2 | 84352 | 1,09 | down |
| 5838171 | 7250799 | 1499399 | collagen, type I, alpha 2  | Coll1a2 | 84352 | 1,47 | up   |
| 5853615 | 7250799 | 1499385 | collagen, type I, alpha 2  | Coll1a2 | 84352 | 1,00 | down |
| 5860390 | 7250799 | 1499391 | collagen, type I, alpha 2  | Coll1a2 | 84352 | 1,21 | down |
| 5862248 | 7250799 | 1499366 | collagen, type I, alpha 2  | Coll1a2 | 84352 | 1,67 | up   |
| 5873165 | 7250799 | 1499354 | collagen, type I, alpha 2  | Coll1a2 | 84352 | 1,15 | down |
| 5883516 | 7250799 | 1499393 | collagen, type I, alpha 2  | Coll1a2 | 84352 | 1,15 | down |
| 5897510 | 7250799 | 1499380 | collagen, type I, alpha 2  | Coll1a2 | 84352 | 1,06 | down |
| 5902652 | 7250799 | 1499387 | collagen, type I, alpha 2  | Coll1a2 | 84352 | 1,18 | up   |
| 5906365 | 7250799 | 1499374 | collagen, type I, alpha 2  | Coll1a2 | 84352 | 1,37 | up   |
| 5931548 | 7250799 | 1499373 | collagen, type I, alpha 2  | Coll1a2 | 84352 | 1,06 | up   |
| 6001243 | 7250799 | 1499392 | collagen, type I, alpha 2  | Coll1a2 | 84352 | 1,16 | up   |
| 6019598 | 7250799 | 1499355 | collagen, type I, alpha 2  | Coll1a2 | 84352 | 1,07 | up   |
| 6044212 | 7250799 | 1499352 | collagen, type I, alpha 2  | Coll1a2 | 84352 | 1,41 | up   |
| 6084652 | 7250799 | 1499389 | collagen, type I, alpha 2  | Coll1a2 | 84352 | 1,07 | up   |
| 6085464 | 7250799 | 1499350 | collagen, type I, alpha 2  | Coll1a2 | 84352 | 1,20 | up   |
| 6091185 | 7250799 | 1499386 | collagen, type I, alpha 2  | Coll1a2 | 84352 | 1,09 | up   |
| 6102110 | 7250799 | 1499368 | collagen, type I, alpha 2  | Coll1a2 | 84352 | 1,08 | down |
| 6115516 | 7250799 | 1499365 | collagen, type I, alpha 2  | Coll1a2 | 84352 | 1,05 | down |
| 6167786 | 7250799 | 1499364 | collagen, type I, alpha 2  | Coll1a2 | 84352 | 1,49 | down |
| 6184045 | 7250799 | 1499357 | collagen, type I, alpha 2  | Coll1a2 | 84352 | 1,23 | down |
| 6194897 | 7250799 | 1499361 | collagen, type I, alpha 2  | Coll1a2 | 84352 | 1,17 | up   |
| 6210405 | 7250799 | 1499388 | collagen, type I, alpha 2  | Coll1a2 | 84352 | 1,34 | down |
| 6219623 | 7250799 | 1499375 | collagen, type I, alpha 2  | Coll1a2 | 84352 | 1,15 | down |
| 6228974 | 7250799 | 1499394 | collagen, type I, alpha 2  | Coll1a2 | 84352 | 2,07 | down |
| 6301327 | 7250799 | 1499378 | collagen, type I, alpha 2  | Coll1a2 | 84352 | 1,17 | down |
| 6351261 | 7250799 | 1499376 | collagen, type I, alpha 2  | Coll1a2 | 84352 | 1,14 | down |
| 6356820 | 7250799 | 1499395 | collagen, type I, alpha 2  | Coll1a2 | 84352 | 1,32 | down |
| 6369121 | 7250799 | 1499370 | collagen, type I, alpha 2  | Coll1a2 | 84352 | 1,28 | up   |
| 6387933 | 7250799 | 1499383 | collagen, type I, alpha 2  | Coll1a2 | 84352 | 1,11 | down |
| 6440601 | 7250799 | 1499367 | collagen, type I, alpha 2  | Coll1a2 | 84352 | 1,32 | down |
| 6487788 | 7250799 | 1499371 | collagen, type I, alpha 2  | Coll1a2 | 84352 | 1,10 | up   |
| 6525196 | 7250799 | 1499349 | collagen, type I, alpha 2  | Coll1a2 | 84352 | 1,16 | up   |
| 6546386 | 7250799 | 1499390 | collagen, type I, alpha 2  | Coll1a2 | 84352 | 1,20 | up   |
| 6592823 | 7250799 | 1499362 | collagen, type I, alpha 2  | Coll1a2 | 84352 | 1,14 | up   |
| 6610293 | 7250799 | 1499372 | collagen, type I, alpha 2  | Coll1a2 | 84352 | 1,46 | down |
| 6615333 | 7250799 | 1499398 | collagen, type I, alpha 2  | Coll1a2 | 84352 | 1,04 | down |
| 6691733 | 7250799 | 1499377 | collagen, type I, alpha 2  | Coll1a2 | 84352 | 1,24 | up   |
| 6695318 | 7250799 | 1499384 | collagen, type I, alpha 2  | Coll1a2 | 84352 | 1,04 | up   |
| 6734970 | 7250799 | 1499356 | collagen, type I, alpha 2  | Coll1a2 | 84352 | 1,69 | down |
| 5619738 | 7331446 | 1699320 | collagen, type II, alpha 1 | Col2a1  | 25412 | 1,27 | down |
| 5631499 | 7331446 | 1699335 | collagen, type II, alpha 1 | Col2a1  | 25412 | 1,50 | up   |
| 5639735 | 7331446 | 1699330 | collagen, type II, alpha 1 | Col2a1  | 25412 | 1,27 | up   |
| 5667428 | 7331446 | 1699316 | collagen, type II, alpha 1 | Col2a1  | 25412 | 1,09 | up   |
| 5671297 | 7331446 | 1699325 | collagen, type II, alpha 1 | Col2a1  | 25412 | 1,78 | up   |

|         |         |         |                             |        |       |      |      |
|---------|---------|---------|-----------------------------|--------|-------|------|------|
| 5679814 | 7331446 | 1699317 | collagen, type II, alpha 1  | Col2a1 | 25412 | 1,10 | down |
| 5690049 | 7331446 | 1699329 | collagen, type II, alpha 1  | Col2a1 | 25412 | 1,11 | up   |
| 5758459 | 7331446 | 1699327 | collagen, type II, alpha 1  | Col2a1 | 25412 | 1,40 | down |
| 5777712 | 7331446 | 1699326 | collagen, type II, alpha 1  | Col2a1 | 25412 | 1,08 | up   |
| 5780540 | 7331446 | 1699314 | collagen, type II, alpha 1  | Col2a1 | 25412 | 1,59 | up   |
| 5790345 | 7331446 | 1699342 | collagen, type II, alpha 1  | Col2a1 | 25412 | 1,38 | down |
| 5795387 | 7331446 | 1699313 | collagen, type II, alpha 1  | Col2a1 | 25412 | 1,35 | up   |
| 5810477 | 7331446 | 1699311 | collagen, type II, alpha 1  | Col2a1 | 25412 | 1,50 | up   |
| 5822897 | 7331446 | 1699340 | collagen, type II, alpha 1  | Col2a1 | 25412 | 1,10 | down |
| 5828615 | 7331446 | 1699318 | collagen, type II, alpha 1  | Col2a1 | 25412 | 1,66 | down |
| 5854220 | 7331446 | 1699333 | collagen, type II, alpha 1  | Col2a1 | 25412 | 1,16 | down |
| 5871070 | 7331446 | 1699344 | collagen, type II, alpha 1  | Col2a1 | 25412 | 1,18 | up   |
| 5927230 | 7331446 | 1699321 | collagen, type II, alpha 1  | Col2a1 | 25412 | 1,18 | down |
| 5978032 | 7331446 | 1699301 | collagen, type II, alpha 1  | Col2a1 | 25412 | 1,42 | up   |
| 5988224 | 7331446 | 1699343 | collagen, type II, alpha 1  | Col2a1 | 25412 | 1,02 | up   |
| 6008792 | 7331446 | 1699332 | collagen, type II, alpha 1  | Col2a1 | 25412 | 1,20 | up   |
| 6023937 | 7331446 | 1699305 | collagen, type II, alpha 1  | Col2a1 | 25412 | 1,05 | up   |
| 6049346 | 7331446 | 1699328 | collagen, type II, alpha 1  | Col2a1 | 25412 | 1,45 | down |
| 6076085 | 7331446 | 1699303 | collagen, type II, alpha 1  | Col2a1 | 25412 | 1,53 | up   |
| 6094200 | 7331446 | 1699296 | collagen, type II, alpha 1  | Col2a1 | 25412 | 1,33 | down |
| 6136224 | 7331446 | 1699307 | collagen, type II, alpha 1  | Col2a1 | 25412 | 1,56 | up   |
| 6151999 | 7331446 | 1699310 | collagen, type II, alpha 1  | Col2a1 | 25412 | 1,21 | up   |
| 6171453 | 7331446 | 1699324 | collagen, type II, alpha 1  | Col2a1 | 25412 | 1,15 | down |
| 6172040 | 7331446 | 1699306 | collagen, type II, alpha 1  | Col2a1 | 25412 | 1,15 | down |
| 6173981 | 7331446 | 1699308 | collagen, type II, alpha 1  | Col2a1 | 25412 | 1,73 | up   |
| 6174598 | 7331446 | 1699338 | collagen, type II, alpha 1  | Col2a1 | 25412 | 1,54 | up   |
| 6187179 | 7331446 | 1699299 | collagen, type II, alpha 1  | Col2a1 | 25412 | 1,03 | down |
| 6210051 | 7331446 | 1699348 | collagen, type II, alpha 1  | Col2a1 | 25412 | 1,09 | up   |
| 6217065 | 7331446 | 1699339 | collagen, type II, alpha 1  | Col2a1 | 25412 | 1,05 | up   |
| 6221205 | 7331446 | 1699309 | collagen, type II, alpha 1  | Col2a1 | 25412 | 1,10 | down |
| 6239575 | 7331446 | 1699336 | collagen, type II, alpha 1  | Col2a1 | 25412 | 1,34 | down |
| 6257035 | 7331446 | 1699304 | collagen, type II, alpha 1  | Col2a1 | 25412 | 1,26 | down |
| 6278238 | 7331446 | 1699315 | collagen, type II, alpha 1  | Col2a1 | 25412 | 1,30 | up   |
| 6295629 | 7331446 | 1699319 | collagen, type II, alpha 1  | Col2a1 | 25412 | 1,56 | down |
| 6324997 | 7331446 | 1699313 | collagen, type II, alpha 1  | Col2a1 | 25412 | 1,57 | up   |
| 6327101 | 7331446 | 1699300 | collagen, type II, alpha 1  | Col2a1 | 25412 | 1,21 | down |
| 6382321 | 7331446 | 1699297 | collagen, type II, alpha 1  | Col2a1 | 25412 | 1,18 | up   |
| 6392381 | 7331446 | 1699323 | collagen, type II, alpha 1  | Col2a1 | 25412 | 1,14 | up   |
| 6450578 | 7331446 | 1699302 | collagen, type II, alpha 1  | Col2a1 | 25412 | 1,28 | down |
| 6482024 | 7331446 | 1699312 | collagen, type II, alpha 1  | Col2a1 | 25412 | 1,01 | down |
| 6517716 | 7331446 | 1699346 | collagen, type II, alpha 1  | Col2a1 | 25412 | 1,36 | up   |
| 6542787 | 7331446 | 1699348 | collagen, type II, alpha 1  | Col2a1 | 25412 | 1,26 | up   |
| 6566173 | 7331446 | 1699334 | collagen, type II, alpha 1  | Col2a1 | 25412 | 1,76 | up   |
| 6599008 | 7331446 | 1699298 | collagen, type II, alpha 1  | Col2a1 | 25412 | 1,29 | down |
| 6608512 | 7331446 | 1699345 | collagen, type II, alpha 1  | Col2a1 | 25412 | 1,51 | down |
| 6625080 | 7331446 | 1699341 | collagen, type II, alpha 1  | Col2a1 | 25412 | 1,16 | down |
| 6626325 | 7331446 | 1699322 | collagen, type II, alpha 1  | Col2a1 | 25412 | 1,21 | down |
| 6640310 | 7331446 | 1699330 | collagen, type II, alpha 1  | Col2a1 | 25412 | 2,02 | up   |
| 6649444 | 7331446 | 1699337 | collagen, type II, alpha 1  | Col2a1 | 25412 | 1,05 | up   |
| 6663354 | 7331446 | 1699307 | collagen, type II, alpha 1  | Col2a1 | 25412 | 1,06 | down |
| 6700077 | 7331446 | 1699347 | collagen, type II, alpha 1  | Col2a1 | 25412 | 2,04 | down |
| 6703722 | 7331446 | 1699296 | collagen, type II, alpha 1  | Col2a1 | 25412 | 1,07 | down |
| 6707301 | 7331446 | 1699331 | collagen, type II, alpha 1  | Col2a1 | 25412 | 1,06 | up   |
| 5627936 | 7354140 | 1755117 | collagen, type III, alpha 1 | Col3a1 | 84032 | 1,34 | up   |
| 5670575 | 7354140 | 1755126 | collagen, type III, alpha 1 | Col3a1 | 84032 | 1,75 | up   |
| 5682812 | 7354140 | 1755162 | collagen, type III, alpha 1 | Col3a1 | 84032 | 1,24 | down |

|         |         |         |                             |        |        |      |      |
|---------|---------|---------|-----------------------------|--------|--------|------|------|
| 5734306 | 7354140 | 1755141 | collagen, type III, alpha 1 | Col3a1 | 84032  | 1,22 | down |
| 5757977 | 7354140 | 1755159 | collagen, type III, alpha 1 | Col3a1 | 84032  | 1,25 | up   |
| 5771331 | 7354140 | 1755158 | collagen, type III, alpha 1 | Col3a1 | 84032  | 1,02 | down |
| 5773172 | 7354140 | 1755143 | collagen, type III, alpha 1 | Col3a1 | 84032  | 1,12 | down |
| 5813713 | 7354140 | 1755146 | collagen, type III, alpha 1 | Col3a1 | 84032  | 1,50 | down |
| 5880562 | 7354140 | 1755111 | collagen, type III, alpha 1 | Col3a1 | 84032  | 1,07 | down |
| 5882583 | 7354140 | 1755155 | collagen, type III, alpha 1 | Col3a1 | 84032  | 1,37 | down |
| 5888051 | 7354140 | 1755128 | collagen, type III, alpha 1 | Col3a1 | 84032  | 1,04 | up   |
| 5920036 | 7354140 | 1755129 | collagen, type III, alpha 1 | Col3a1 | 84032  | 1,21 | up   |
| 5959081 | 7354140 | 1755132 | collagen, type III, alpha 1 | Col3a1 | 84032  | 1,05 | up   |
| 5967668 | 7354140 | 1755131 | collagen, type III, alpha 1 | Col3a1 | 84032  | 1,16 | up   |
| 5976980 | 7354140 | 1755151 | collagen, type III, alpha 1 | Col3a1 | 84032  | 1,18 | down |
| 5997036 | 7354140 | 1755154 | collagen, type III, alpha 1 | Col3a1 | 84032  | 1,03 | down |
| 6006887 | 7354140 | 1755127 | collagen, type III, alpha 1 | Col3a1 | 84032  | 1,03 | up   |
| 6012991 | 7354140 | 1755160 | collagen, type III, alpha 1 | Col3a1 | 84032  | 1,51 | down |
| 6048275 | 7354140 | 1755154 | collagen, type III, alpha 1 | Col3a1 | 84032  | 1,48 | down |
| 6075051 | 7354140 | 1755145 | collagen, type III, alpha 1 | Col3a1 | 84032  | 1,12 | down |
| 6143174 | 7354140 | 1755161 | collagen, type III, alpha 1 | Col3a1 | 84032  | 1,17 | up   |
| 6145126 | 7354140 | 1755130 | collagen, type III, alpha 1 | Col3a1 | 84032  | 1,27 | up   |
| 6146413 | 7354140 | 1755150 | collagen, type III, alpha 1 | Col3a1 | 84032  | 1,14 | up   |
| 6161793 | 7354140 | 1755153 | collagen, type III, alpha 1 | Col3a1 | 84032  | 1,19 | down |
| 6233178 | 7354140 | 1755120 | collagen, type III, alpha 1 | Col3a1 | 84032  | 1,49 | down |
| 6241362 | 7354140 | 1755116 | collagen, type III, alpha 1 | Col3a1 | 84032  | 1,07 | up   |
| 6255882 | 7354140 | 1755147 | collagen, type III, alpha 1 | Col3a1 | 84032  | 1,70 | down |
| 6259096 | 7354140 | 1755118 | collagen, type III, alpha 1 | Col3a1 | 84032  | 1,62 | down |
| 6311465 | 7354140 | 1755152 | collagen, type III, alpha 1 | Col3a1 | 84032  | 1,58 | down |
| 6341154 | 7354140 | 1755136 | collagen, type III, alpha 1 | Col3a1 | 84032  | 1,52 | up   |
| 6360335 | 7354140 | 1755112 | collagen, type III, alpha 1 | Col3a1 | 84032  | 1,22 | down |
| 6372977 | 7354140 | 1755149 | collagen, type III, alpha 1 | Col3a1 | 84032  | 1,01 | down |
| 6374411 | 7354140 | 1755121 | collagen, type III, alpha 1 | Col3a1 | 84032  | 1,63 | down |
| 6433701 | 7354140 | 1755144 | collagen, type III, alpha 1 | Col3a1 | 84032  | 1,19 | up   |
| 6444288 | 7354140 | 1755138 | collagen, type III, alpha 1 | Col3a1 | 84032  | 1,19 | up   |
| 6472725 | 7354140 | 1755135 | collagen, type III, alpha 1 | Col3a1 | 84032  | 1,30 | down |
| 6472751 | 7354140 | 1755124 | collagen, type III, alpha 1 | Col3a1 | 84032  | 1,04 | up   |
| 6482089 | 7354140 | 1755122 | collagen, type III, alpha 1 | Col3a1 | 84032  | 1,21 | up   |
| 6485346 | 7354140 | 1755125 | collagen, type III, alpha 1 | Col3a1 | 84032  | 1,18 | up   |
| 6521992 | 7354140 | 1755114 | collagen, type III, alpha 1 | Col3a1 | 84032  | 1,01 | up   |
| 6544106 | 7354140 | 1755115 | collagen, type III, alpha 1 | Col3a1 | 84032  | 2,55 | down |
| 6546094 | 7354140 | 1755148 | collagen, type III, alpha 1 | Col3a1 | 84032  | 1,06 | up   |
| 6566101 | 7354140 | 1755157 | collagen, type III, alpha 1 | Col3a1 | 84032  | 1,21 | down |
| 6601571 | 7354140 | 1755163 | collagen, type III, alpha 1 | Col3a1 | 84032  | 1,01 | down |
| 6603648 | 7354140 | 1755123 | collagen, type III, alpha 1 | Col3a1 | 84032  | 1,74 | down |
| 6611882 | 7354140 | 1755139 | collagen, type III, alpha 1 | Col3a1 | 84032  | 1,11 | down |
| 6648841 | 7354140 | 1755133 | collagen, type III, alpha 1 | Col3a1 | 84032  | 1,10 | up   |
| 6652063 | 7354140 | 1755134 | collagen, type III, alpha 1 | Col3a1 | 84032  | 1,51 | down |
| 6655879 | 7354140 | 1755156 | collagen, type III, alpha 1 | Col3a1 | 84032  | 1,12 | up   |
| 6657624 | 7354140 | 1755142 | collagen, type III, alpha 1 | Col3a1 | 84032  | 1,65 | down |
| 6687482 | 7354140 | 1755115 | collagen, type III, alpha 1 | Col3a1 | 84032  | 1,06 | down |
| 6699261 | 7354140 | 1755119 | collagen, type III, alpha 1 | Col3a1 | 84032  | 1,26 | down |
| 6721119 | 7354140 | 1755113 | collagen, type III, alpha 1 | Col3a1 | 84032  | 1,31 | down |
| 6721841 | 7354140 | 1755137 | collagen, type III, alpha 1 | Col3a1 | 84032  | 1,06 | down |
| 6733289 | 7354140 | 1755140 | collagen, type III, alpha 1 | Col3a1 | 84032  | 1,10 | down |
| 5649845 | 7147828 | 1245553 | collagen, type IV, alpha 1  | Col4a1 | 290905 | 1,42 | down |
| 5663204 | 7147828 | 1245565 | collagen, type IV, alpha 1  | Col4a1 | 290905 | 1,24 | up   |
| 5675487 | 7147828 | 1245496 | collagen, type IV, alpha 1  | Col4a1 | 290905 | 1,13 | up   |
| 5679363 | 7147828 | 1245520 | collagen, type IV, alpha 1  | Col4a1 | 290905 | 1,13 | up   |



|         |         |         |                            |        |        |      |      |
|---------|---------|---------|----------------------------|--------|--------|------|------|
| 5733585 | 7147828 | 1245519 | collagen, type IV, alpha 1 | Col4a1 | 290905 | 1,63 | down |
| 5748661 | 7147828 | 1245532 | collagen, type IV, alpha 1 | Col4a1 | 290905 | 1,30 | down |
| 5759743 | 7147828 | 1245541 | collagen, type IV, alpha 1 | Col4a1 | 290905 | 1,23 | down |
| 5764486 | 7147828 | 1245531 | collagen, type IV, alpha 1 | Col4a1 | 290905 | 1,66 | up   |
| 5790087 | 7147828 | 1245549 | collagen, type IV, alpha 1 | Col4a1 | 290905 | 1,04 | up   |
| 5791333 | 7147828 | 1245569 | collagen, type IV, alpha 1 | Col4a1 | 290905 | 1,61 | up   |
| 5816622 | 7147828 | 1245496 | collagen, type IV, alpha 1 | Col4a1 | 290905 | 1,01 | down |
| 5827476 | 7147828 | 1245544 | collagen, type IV, alpha 1 | Col4a1 | 290905 | 1,66 | down |
| 5856209 | 7147828 | 1245533 | collagen, type IV, alpha 1 | Col4a1 | 290905 | 1,30 | up   |
| 5882928 | 7147828 | 1245542 | collagen, type IV, alpha 1 | Col4a1 | 290905 | 1,12 | up   |
| 5923227 | 7147828 | 1245512 | collagen, type IV, alpha 1 | Col4a1 | 290905 | 1,32 | up   |
| 5927023 | 7147828 | 1245518 | collagen, type IV, alpha 1 | Col4a1 | 290905 | 1,03 | down |
| 5948146 | 7147828 | 1245560 | collagen, type IV, alpha 1 | Col4a1 | 290905 | 1,63 | down |
| 5970291 | 7147828 | 1245534 | collagen, type IV, alpha 1 | Col4a1 | 290905 | 1,10 | down |
| 5970497 | 7147828 | 1245540 | collagen, type IV, alpha 1 | Col4a1 | 290905 | 1,15 | up   |
| 5973393 | 7147828 | 1245545 | collagen, type IV, alpha 1 | Col4a1 | 290905 | 1,06 | up   |
| 5989129 | 7147828 | 1245543 | collagen, type IV, alpha 1 | Col4a1 | 290905 | 1,32 | down |
| 5991337 | 7147828 | 1245515 | collagen, type IV, alpha 1 | Col4a1 | 290905 | 1,40 | up   |
| 6002773 | 7147828 | 1245523 | collagen, type IV, alpha 1 | Col4a1 | 290905 | 1,25 | up   |
| 6017768 | 7147828 | 1245568 | collagen, type IV, alpha 1 | Col4a1 | 290905 | 1,64 | up   |
| 6048586 | 7147828 | 1245530 | collagen, type IV, alpha 1 | Col4a1 | 290905 | 1,34 | up   |
| 6054629 | 7147828 | 1245547 | collagen, type IV, alpha 1 | Col4a1 | 290905 | 1,29 | down |
| 6071861 | 7147828 | 1245549 | collagen, type IV, alpha 1 | Col4a1 | 290905 | 1,02 | up   |
| 6077691 | 7147828 | 1245516 | collagen, type IV, alpha 1 | Col4a1 | 290905 | 1,57 | up   |
| 6087471 | 7147828 | 1245569 | collagen, type IV, alpha 1 | Col4a1 | 290905 | 1,73 | down |
| 6096351 | 7147828 | 1245557 | collagen, type IV, alpha 1 | Col4a1 | 290905 | 1,12 | up   |
| 6099922 | 7147828 | 1245569 | collagen, type IV, alpha 1 | Col4a1 | 290905 | 1,19 | up   |
| 6101702 | 7147828 | 1245521 | collagen, type IV, alpha 1 | Col4a1 | 290905 | 1,65 | down |
| 6107636 | 7147828 | 1245522 | collagen, type IV, alpha 1 | Col4a1 | 290905 | 1,57 | up   |
| 6117613 | 7147828 | 1245562 | collagen, type IV, alpha 1 | Col4a1 | 290905 | 1,97 | up   |
| 6119679 | 7147828 | 1245517 | collagen, type IV, alpha 1 | Col4a1 | 290905 | 1,51 | up   |
| 6129793 | 7147828 | 1245526 | collagen, type IV, alpha 1 | Col4a1 | 290905 | 1,03 | down |
| 6162775 | 7147828 | 1245548 | collagen, type IV, alpha 1 | Col4a1 | 290905 | 1,19 | up   |
| 6163403 | 7147828 | 1245506 | collagen, type IV, alpha 1 | Col4a1 | 290905 | 1,22 | down |
| 6250748 | 7147828 | 1245539 | collagen, type IV, alpha 1 | Col4a1 | 290905 | 1,04 | up   |
| 6257377 | 7147828 | 1245556 | collagen, type IV, alpha 1 | Col4a1 | 290905 | 1,27 | down |
| 6258844 | 7147828 | 1245546 | collagen, type IV, alpha 1 | Col4a1 | 290905 | 1,72 | up   |
| 6261091 | 7147828 | 1245552 | collagen, type IV, alpha 1 | Col4a1 | 290905 | 1,26 | down |
| 6284999 | 7147828 | 1245567 | collagen, type IV, alpha 1 | Col4a1 | 290905 | 1,04 | up   |
| 6300989 | 7147828 | 1245535 | collagen, type IV, alpha 1 | Col4a1 | 290905 | 1,47 | down |
| 6313448 | 7147828 | 1245513 | collagen, type IV, alpha 1 | Col4a1 | 290905 | 1,09 | up   |
| 6323465 | 7147828 | 1245532 | collagen, type IV, alpha 1 | Col4a1 | 290905 | 1,43 | down |
| 6324401 | 7147828 | 1245550 | collagen, type IV, alpha 1 | Col4a1 | 290905 | 2,12 | up   |
| 6327269 | 7147828 | 1245525 | collagen, type IV, alpha 1 | Col4a1 | 290905 | 1,10 | up   |
| 6339035 | 7147828 | 1245561 | collagen, type IV, alpha 1 | Col4a1 | 290905 | 1,22 | down |
| 6391328 | 7147828 | 1245527 | collagen, type IV, alpha 1 | Col4a1 | 290905 | 1,07 | up   |
| 6413101 | 7147828 | 1245564 | collagen, type IV, alpha 1 | Col4a1 | 290905 | 1,10 | up   |
| 6443817 | 7147828 | 1245569 | collagen, type IV, alpha 1 | Col4a1 | 290905 | 1,21 | down |
| 6470142 | 7147828 | 1245569 | collagen, type IV, alpha 1 | Col4a1 | 290905 | 1,14 | down |
| 6484590 | 7147828 | 1245554 | collagen, type IV, alpha 1 | Col4a1 | 290905 | 1,12 | up   |
| 6500794 | 7147828 | 1245559 | collagen, type IV, alpha 1 | Col4a1 | 290905 | 1,12 | down |
| 6556680 | 7147828 | 1245569 | collagen, type IV, alpha 1 | Col4a1 | 290905 | 1,10 | down |
| 6558733 | 7147828 | 1245514 | collagen, type IV, alpha 1 | Col4a1 | 290905 | 1,89 | up   |
| 6580970 | 7147828 | 1245538 | collagen, type IV, alpha 1 | Col4a1 | 290905 | 1,87 | up   |
| 6588263 | 7147828 | 1245569 | collagen, type IV, alpha 1 | Col4a1 | 290905 | 1,02 | down |
| 6606913 | 7147828 | 1245554 | collagen, type IV, alpha 1 | Col4a1 | 290905 | 1,09 | down |

|         |         |         |                                                                  |          |        |      |      |
|---------|---------|---------|------------------------------------------------------------------|----------|--------|------|------|
| 6616618 | 7147828 | 1245563 | collagen, type IV, alpha 1                                       | Col4a1   | 290905 | 1,69 | down |
| 6620335 | 7147828 | 1245569 | collagen, type IV, alpha 1                                       | Col4a1   | 290905 | 1,02 | up   |
| 6683898 | 7147828 | 1245547 | collagen, type IV, alpha 1                                       | Col4a1   | 290905 | 2,28 | up   |
| 6724160 | 7147828 | 1245558 | collagen, type IV, alpha 1                                       | Col4a1   | 290905 | 1,00 | up   |
| 5646652 | 7188638 | 1346188 | collagen, type IV, alpha 3 (Goodpasture antigen) binding protein | Col4a3bp | 365652 | 1,21 | up   |
| 5688169 | 7188638 | 1346188 | collagen, type IV, alpha 3 (Goodpasture antigen) binding protein | Col4a3bp | 365652 | 2,20 | down |
| 5690906 | 7188638 | 1346192 | collagen, type IV, alpha 3 (Goodpasture antigen) binding protein | Col4a3bp | 365652 | 1,08 | up   |
| 5792764 | 7188638 | 1346189 | collagen, type IV, alpha 3 (Goodpasture antigen) binding protein | Col4a3bp | 365652 | 1,04 | down |
| 5837112 | 7188638 | 1346194 | collagen, type IV, alpha 3 (Goodpasture antigen) binding protein | Col4a3bp | 365652 | 1,12 | down |
| 5986269 | 7188638 | 1346206 | collagen, type IV, alpha 3 (Goodpasture antigen) binding protein | Col4a3bp | 365652 | 1,01 | up   |
| 5997803 | 7188638 | 1346210 | collagen, type IV, alpha 3 (Goodpasture antigen) binding protein | Col4a3bp | 365652 | 1,27 | up   |
| 6050804 | 7188638 | 1346205 | collagen, type IV, alpha 3 (Goodpasture antigen) binding protein | Col4a3bp | 365652 | 1,01 | up   |
| 6085982 | 7188638 | 1346210 | collagen, type IV, alpha 3 (Goodpasture antigen) binding protein | Col4a3bp | 365652 | 1,17 | down |
| 6163395 | 7188638 | 1346200 | collagen, type IV, alpha 3 (Goodpasture antigen) binding protein | Col4a3bp | 365652 | 1,14 | down |
| 6174176 | 7188638 | 1346202 | collagen, type IV, alpha 3 (Goodpasture antigen) binding protein | Col4a3bp | 365652 | 1,11 | down |
| 6191522 | 7188638 | 1346198 | collagen, type IV, alpha 3 (Goodpasture antigen) binding protein | Col4a3bp | 365652 | 1,31 | down |
| 6196576 | 7188638 | 1346194 | collagen, type IV, alpha 3 (Goodpasture antigen) binding protein | Col4a3bp | 365652 | 1,19 | up   |
| 6234028 | 7188638 | 1346188 | collagen, type IV, alpha 3 (Goodpasture antigen) binding protein | Col4a3bp | 365652 | 1,25 | up   |
| 6297058 | 7188638 | 1346204 | collagen, type IV, alpha 3 (Goodpasture antigen) binding protein | Col4a3bp | 365652 | 1,33 | down |
| 6361557 | 7188638 | 1346211 | collagen, type IV, alpha 3 (Goodpasture antigen) binding protein | Col4a3bp | 365652 | 1,12 | up   |
| 6362383 | 7188638 | 1346188 | collagen, type IV, alpha 3 (Goodpasture antigen) binding protein | Col4a3bp | 365652 | 1,10 | up   |
| 6378527 | 7188638 | 1346201 | collagen, type IV, alpha 3 (Goodpasture antigen) binding protein | Col4a3bp | 365652 | 1,24 | up   |
| 6408132 | 7188638 | 1346199 | collagen, type IV, alpha 3 (Goodpasture antigen) binding protein | Col4a3bp | 365652 | 1,47 | down |
| 6443056 | 7188638 | 1346197 | collagen, type IV, alpha 3 (Goodpasture antigen) binding protein | Col4a3bp | 365652 | 1,11 | down |
| 6463649 | 7188638 | 1346197 | collagen, type IV, alpha 3 (Goodpasture antigen) binding protein | Col4a3bp | 365652 | 1,10 | down |
| 6468947 | 7188638 | 1346195 | collagen, type IV, alpha 3 (Goodpasture antigen) binding protein | Col4a3bp | 365652 | 1,07 | down |
| 6558071 | 7188638 | 1346207 | collagen, type IV, alpha 3 (Goodpasture antigen) binding protein | Col4a3bp | 365652 | 1,31 | up   |
| 6580115 | 7188638 | 1346196 | collagen, type IV, alpha 3 (Goodpasture antigen) binding protein | Col4a3bp | 365652 | 1,18 | down |
| 6647880 | 7188638 | 1346188 | collagen, type IV, alpha 3 (Goodpasture antigen) binding protein | Col4a3bp | 365652 | 1,30 | up   |
| 6653612 | 7188638 | 1346207 | collagen, type IV, alpha 3 (Goodpasture antigen) binding protein | Col4a3bp | 365652 | 1,04 | up   |
| 6679681 | 7188638 | 1346210 | collagen, type IV, alpha 3 (Goodpasture antigen) binding protein | Col4a3bp | 365652 | 1,74 | up   |
| 6693328 | 7188638 | 1346208 | collagen, type IV, alpha 3 (Goodpasture antigen) binding protein | Col4a3bp | 365652 | 1,28 | down |
| 5664849 | 7380497 | 1821880 | collagen, type IV, alpha 5                                       | Col4a5   | 363457 | 1,00 | up   |
| 5893147 | 7380497 | 1821876 | collagen, type IV, alpha 5                                       | Col4a5   | 363457 | 1,28 | down |
| 6183768 | 7380497 | 1821821 | collagen, type IV, alpha 5                                       | Col4a5   | 363457 | 1,14 | up   |
| 6610834 | 7380497 | 1821880 | collagen, type IV, alpha 5                                       | Col4a5   | 363457 | 1,00 | down |
| 5626266 | 7225634 | 1436226 | collagen, type V, alpha 1                                        | Col5a1   | 85490  | 1,40 | up   |
| 5665108 | 7225634 | 1436225 | collagen, type V, alpha 1                                        | Col5a1   | 85490  | 1,08 | up   |
| 5668831 | 7225634 | 1436190 | collagen, type V, alpha 1                                        | Col5a1   | 85490  | 1,28 | down |
| 5693876 | 7225634 | 1436218 | collagen, type V, alpha 1                                        | Col5a1   | 85490  | 1,09 | down |
| 5714287 | 7225634 | 1436248 | collagen, type V, alpha 1                                        | Col5a1   | 85490  | 1,16 | down |
| 5733751 | 7225634 | 1436194 | collagen, type V, alpha 1                                        | Col5a1   | 85490  | 1,27 | up   |
| 5754900 | 7225634 | 1436244 | collagen, type V, alpha 1                                        | Col5a1   | 85490  | 1,06 | down |
| 5777419 | 7225634 | 1436223 | collagen, type V, alpha 1                                        | Col5a1   | 85490  | 1,07 | down |
| 5781921 | 7225634 | 1436222 | collagen, type V, alpha 1                                        | Col5a1   | 85490  | 1,68 | up   |
| 5788081 | 7225634 | 1436230 | collagen, type V, alpha 1                                        | Col5a1   | 85490  | 1,51 | down |
| 5795909 | 7225634 | 1436238 | collagen, type V, alpha 1                                        | Col5a1   | 85490  | 1,04 | up   |
| 5800033 | 7225634 | 1436193 | collagen, type V, alpha 1                                        | Col5a1   | 85490  | 1,12 | up   |
| 5809976 | 7225634 | 1436241 | collagen, type V, alpha 1                                        | Col5a1   | 85490  | 1,02 | up   |
| 5870468 | 7225634 | 1436210 | collagen, type V, alpha 1                                        | Col5a1   | 85490  | 1,13 | up   |
| 5872714 | 7225634 | 1436246 | collagen, type V, alpha 1                                        | Col5a1   | 85490  | 1,06 | up   |
| 5881168 | 7225634 | 1436216 | collagen, type V, alpha 1                                        | Col5a1   | 85490  | 1,55 | down |
| 5910881 | 7225634 | 1436236 | collagen, type V, alpha 1                                        | Col5a1   | 85490  | 1,17 | down |
| 5917648 | 7225634 | 1436251 | collagen, type V, alpha 1                                        | Col5a1   | 85490  | 1,04 | up   |
| 5952809 | 7225634 | 1436219 | collagen, type V, alpha 1                                        | Col5a1   | 85490  | 1,09 | down |
| 5960494 | 7225634 | 1436187 | collagen, type V, alpha 1                                        | Col5a1   | 85490  | 1,02 | up   |

|         |         |         |                           |        |       |      |      |
|---------|---------|---------|---------------------------|--------|-------|------|------|
| 5962789 | 7225634 | 1436201 | collagen, type V, alpha 1 | Col5a1 | 85490 | 1,21 | down |
| 6022529 | 7225634 | 1436208 | collagen, type V, alpha 1 | Col5a1 | 85490 | 1,16 | up   |
| 6026445 | 7225634 | 1436192 | collagen, type V, alpha 1 | Col5a1 | 85490 | 1,02 | up   |
| 6043958 | 7225634 | 1436239 | collagen, type V, alpha 1 | Col5a1 | 85490 | 1,14 | down |
| 6073554 | 7225634 | 1436221 | collagen, type V, alpha 1 | Col5a1 | 85490 | 1,41 | down |
| 6082265 | 7225634 | 1436234 | collagen, type V, alpha 1 | Col5a1 | 85490 | 1,09 | up   |
| 6106625 | 7225634 | 1436189 | collagen, type V, alpha 1 | Col5a1 | 85490 | 1,75 | up   |
| 6149553 | 7225634 | 1436214 | collagen, type V, alpha 1 | Col5a1 | 85490 | 1,37 | up   |
| 6151812 | 7225634 | 1436203 | collagen, type V, alpha 1 | Col5a1 | 85490 | 1,05 | up   |
| 6161716 | 7225634 | 1436247 | collagen, type V, alpha 1 | Col5a1 | 85490 | 1,06 | up   |
| 6162946 | 7225634 | 1436245 | collagen, type V, alpha 1 | Col5a1 | 85490 | 1,16 | up   |
| 6187772 | 7225634 | 1436233 | collagen, type V, alpha 1 | Col5a1 | 85490 | 1,12 | down |
| 6190966 | 7225634 | 1436207 | collagen, type V, alpha 1 | Col5a1 | 85490 | 1,01 | down |
| 6197868 | 7225634 | 1436205 | collagen, type V, alpha 1 | Col5a1 | 85490 | 1,26 | down |
| 6204707 | 7225634 | 1436231 | collagen, type V, alpha 1 | Col5a1 | 85490 | 1,42 | up   |
| 6230883 | 7225634 | 1436250 | collagen, type V, alpha 1 | Col5a1 | 85490 | 1,02 | up   |
| 6245158 | 7225634 | 1436191 | collagen, type V, alpha 1 | Col5a1 | 85490 | 1,16 | up   |
| 6246649 | 7225634 | 1436188 | collagen, type V, alpha 1 | Col5a1 | 85490 | 1,07 | up   |
| 6276516 | 7225634 | 1436227 | collagen, type V, alpha 1 | Col5a1 | 85490 | 1,17 | down |
| 6277341 | 7225634 | 1436209 | collagen, type V, alpha 1 | Col5a1 | 85490 | 1,13 | down |
| 6294259 | 7225634 | 1436215 | collagen, type V, alpha 1 | Col5a1 | 85490 | 1,92 | down |
| 6301299 | 7225634 | 1436211 | collagen, type V, alpha 1 | Col5a1 | 85490 | 1,58 | down |
| 6324302 | 7225634 | 1436220 | collagen, type V, alpha 1 | Col5a1 | 85490 | 1,34 | up   |
| 6341600 | 7225634 | 1436235 | collagen, type V, alpha 1 | Col5a1 | 85490 | 1,17 | up   |
| 6383035 | 7225634 | 1436197 | collagen, type V, alpha 1 | Col5a1 | 85490 | 1,01 | up   |
| 6410519 | 7225634 | 1436232 | collagen, type V, alpha 1 | Col5a1 | 85490 | 1,73 | down |
| 6422513 | 7225634 | 1436224 | collagen, type V, alpha 1 | Col5a1 | 85490 | 2,24 | up   |
| 6462858 | 7225634 | 1436199 | collagen, type V, alpha 1 | Col5a1 | 85490 | 1,12 | down |
| 6497090 | 7225634 | 1436206 | collagen, type V, alpha 1 | Col5a1 | 85490 | 1,93 | down |
| 6499816 | 7225634 | 1436195 | collagen, type V, alpha 1 | Col5a1 | 85490 | 1,16 | down |
| 6515347 | 7225634 | 1436249 | collagen, type V, alpha 1 | Col5a1 | 85490 | 1,11 | up   |
| 6548293 | 7225634 | 1436237 | collagen, type V, alpha 1 | Col5a1 | 85490 | 1,91 | down |
| 6563026 | 7225634 | 1436240 | collagen, type V, alpha 1 | Col5a1 | 85490 | 1,11 | down |
| 6591656 | 7225634 | 1436202 | collagen, type V, alpha 1 | Col5a1 | 85490 | 1,01 | down |
| 6594881 | 7225634 | 1436243 | collagen, type V, alpha 1 | Col5a1 | 85490 | 1,14 | up   |
| 6595295 | 7225634 | 1436229 | collagen, type V, alpha 1 | Col5a1 | 85490 | 1,21 | down |
| 6602721 | 7225634 | 1436196 | collagen, type V, alpha 1 | Col5a1 | 85490 | 3,69 | up   |
| 6631708 | 7225634 | 1436204 | collagen, type V, alpha 1 | Col5a1 | 85490 | 1,08 | down |
| 6656005 | 7225634 | 1436198 | collagen, type V, alpha 1 | Col5a1 | 85490 | 1,10 | down |
| 6660241 | 7225634 | 1436200 | collagen, type V, alpha 1 | Col5a1 | 85490 | 1,35 | down |
| 6687133 | 7225634 | 1436228 | collagen, type V, alpha 1 | Col5a1 | 85490 | 1,06 | down |
| 6689769 | 7225634 | 1436242 | collagen, type V, alpha 1 | Col5a1 | 85490 | 1,02 | up   |
| 6701087 | 7225634 | 1436212 | collagen, type V, alpha 1 | Col5a1 | 85490 | 1,17 | up   |
| 6721783 | 7225634 | 1436213 | collagen, type V, alpha 1 | Col5a1 | 85490 | 1,26 | down |
| 5653467 | 7342881 | 1727067 | collagen, type V, alpha 3 | Col5a3 | 60379 | 1,28 | down |
| 5665622 | 7342881 | 1727080 | collagen, type V, alpha 3 | Col5a3 | 60379 | 1,32 | down |
| 5690004 | 7342881 | 1727096 | collagen, type V, alpha 3 | Col5a3 | 60379 | 1,02 | up   |
| 5768782 | 7342881 | 1727126 | collagen, type V, alpha 3 | Col5a3 | 60379 | 1,56 | down |
| 5771313 | 7342881 | 1727086 | collagen, type V, alpha 3 | Col5a3 | 60379 | 1,38 | down |
| 5805219 | 7342881 | 1727119 | collagen, type V, alpha 3 | Col5a3 | 60379 | 1,18 | up   |
| 5807679 | 7342881 | 1727104 | collagen, type V, alpha 3 | Col5a3 | 60379 | 1,23 | down |
| 5826414 | 7342881 | 1727102 | collagen, type V, alpha 3 | Col5a3 | 60379 | 1,20 | down |
| 5830447 | 7342881 | 1727075 | collagen, type V, alpha 3 | Col5a3 | 60379 | 1,00 | down |
| 5853929 | 7342881 | 1727092 | collagen, type V, alpha 3 | Col5a3 | 60379 | 1,08 | down |
| 5868624 | 7342881 | 1727093 | collagen, type V, alpha 3 | Col5a3 | 60379 | 1,74 | down |
| 5877919 | 7342881 | 1727065 | collagen, type V, alpha 3 | Col5a3 | 60379 | 1,25 | up   |

|         |         |         |                           |        |       |      |      |
|---------|---------|---------|---------------------------|--------|-------|------|------|
| 5890397 | 7342881 | 1727132 | collagen, type V, alpha 3 | Col5a3 | 60379 | 1,06 | up   |
| 5892115 | 7342881 | 1727120 | collagen, type V, alpha 3 | Col5a3 | 60379 | 1,45 | up   |
| 5917822 | 7342881 | 1727070 | collagen, type V, alpha 3 | Col5a3 | 60379 | 1,06 | down |
| 5934837 | 7342881 | 1727116 | collagen, type V, alpha 3 | Col5a3 | 60379 | 1,02 | up   |
| 5939099 | 7342881 | 1727131 | collagen, type V, alpha 3 | Col5a3 | 60379 | 1,18 | up   |
| 5964683 | 7342881 | 1727130 | collagen, type V, alpha 3 | Col5a3 | 60379 | 1,36 | down |
| 5982025 | 7342881 | 1727127 | collagen, type V, alpha 3 | Col5a3 | 60379 | 1,23 | up   |
| 6038774 | 7342881 | 1727123 | collagen, type V, alpha 3 | Col5a3 | 60379 | 1,34 | up   |
| 6064942 | 7342881 | 1727101 | collagen, type V, alpha 3 | Col5a3 | 60379 | 1,02 | down |
| 6069826 | 7342881 | 1727114 | collagen, type V, alpha 3 | Col5a3 | 60379 | 2,83 | up   |
| 6080046 | 7342881 | 1727071 | collagen, type V, alpha 3 | Col5a3 | 60379 | 1,22 | down |
| 6109638 | 7342881 | 1727124 | collagen, type V, alpha 3 | Col5a3 | 60379 | 1,02 | up   |
| 6128024 | 7342881 | 1727110 | collagen, type V, alpha 3 | Col5a3 | 60379 | 1,22 | down |
| 6140894 | 7342881 | 1727100 | collagen, type V, alpha 3 | Col5a3 | 60379 | 2,67 | down |
| 6141694 | 7342881 | 1727088 | collagen, type V, alpha 3 | Col5a3 | 60379 | 1,09 | down |
| 6184001 | 7342881 | 1727089 | collagen, type V, alpha 3 | Col5a3 | 60379 | 1,41 | down |
| 6184521 | 7342881 | 1727106 | collagen, type V, alpha 3 | Col5a3 | 60379 | 1,02 | up   |
| 6192991 | 7342881 | 1727077 | collagen, type V, alpha 3 | Col5a3 | 60379 | 1,13 | down |
| 6210971 | 7342881 | 1727085 | collagen, type V, alpha 3 | Col5a3 | 60379 | 1,11 | down |
| 6227288 | 7342881 | 1727082 | collagen, type V, alpha 3 | Col5a3 | 60379 | 1,18 | up   |
| 6245202 | 7342881 | 1727111 | collagen, type V, alpha 3 | Col5a3 | 60379 | 1,06 | up   |
| 6253297 | 7342881 | 1727099 | collagen, type V, alpha 3 | Col5a3 | 60379 | 1,17 | down |
| 6321458 | 7342881 | 1727103 | collagen, type V, alpha 3 | Col5a3 | 60379 | 1,14 | up   |
| 6322439 | 7342881 | 1727115 | collagen, type V, alpha 3 | Col5a3 | 60379 | 1,08 | up   |
| 6344012 | 7342881 | 1727095 | collagen, type V, alpha 3 | Col5a3 | 60379 | 1,17 | down |
| 6351771 | 7342881 | 1727066 | collagen, type V, alpha 3 | Col5a3 | 60379 | 1,06 | up   |
| 6361312 | 7342881 | 1727105 | collagen, type V, alpha 3 | Col5a3 | 60379 | 1,20 | down |
| 6363294 | 7342881 | 1727069 | collagen, type V, alpha 3 | Col5a3 | 60379 | 2,52 | up   |
| 6403327 | 7342881 | 1727113 | collagen, type V, alpha 3 | Col5a3 | 60379 | 1,43 | down |
| 6409266 | 7342881 | 1727128 | collagen, type V, alpha 3 | Col5a3 | 60379 | 1,23 | up   |
| 6412942 | 7342881 | 1727074 | collagen, type V, alpha 3 | Col5a3 | 60379 | 1,05 | up   |
| 6418762 | 7342881 | 1727112 | collagen, type V, alpha 3 | Col5a3 | 60379 | 1,06 | up   |
| 6420832 | 7342881 | 1727109 | collagen, type V, alpha 3 | Col5a3 | 60379 | 1,02 | down |
| 6460970 | 7342881 | 1727118 | collagen, type V, alpha 3 | Col5a3 | 60379 | 1,75 | down |
| 6482146 | 7342881 | 1727098 | collagen, type V, alpha 3 | Col5a3 | 60379 | 1,54 | down |
| 6491462 | 7342881 | 1727125 | collagen, type V, alpha 3 | Col5a3 | 60379 | 1,04 | up   |
| 6511083 | 7342881 | 1727090 | collagen, type V, alpha 3 | Col5a3 | 60379 | 1,37 | down |
| 6518975 | 7342881 | 1727129 | collagen, type V, alpha 3 | Col5a3 | 60379 | 1,33 | up   |
| 6529033 | 7342881 | 1727081 | collagen, type V, alpha 3 | Col5a3 | 60379 | 1,33 | up   |
| 6536673 | 7342881 | 1727083 | collagen, type V, alpha 3 | Col5a3 | 60379 | 1,18 | up   |
| 6546160 | 7342881 | 1727094 | collagen, type V, alpha 3 | Col5a3 | 60379 | 1,18 | down |
| 6568216 | 7342881 | 1727072 | collagen, type V, alpha 3 | Col5a3 | 60379 | 1,30 | down |
| 6573886 | 7342881 | 1727097 | collagen, type V, alpha 3 | Col5a3 | 60379 | 1,13 | up   |
| 6583119 | 7342881 | 1727117 | collagen, type V, alpha 3 | Col5a3 | 60379 | 1,06 | up   |
| 6585120 | 7342881 | 1727074 | collagen, type V, alpha 3 | Col5a3 | 60379 | 1,01 | up   |
| 6602045 | 7342881 | 1727091 | collagen, type V, alpha 3 | Col5a3 | 60379 | 1,02 | up   |
| 6616788 | 7342881 | 1727079 | collagen, type V, alpha 3 | Col5a3 | 60379 | 1,01 | down |
| 6619847 | 7342881 | 1727070 | collagen, type V, alpha 3 | Col5a3 | 60379 | 2,03 | up   |
| 6657870 | 7342881 | 1727068 | collagen, type V, alpha 3 | Col5a3 | 60379 | 1,47 | down |
| 6658534 | 7342881 | 1727121 | collagen, type V, alpha 3 | Col5a3 | 60379 | 1,36 | down |
| 6669533 | 7342881 | 1727108 | collagen, type V, alpha 3 | Col5a3 | 60379 | 1,33 | up   |
| 6669838 | 7342881 | 1727073 | collagen, type V, alpha 3 | Col5a3 | 60379 | 1,04 | up   |
| 6687570 | 7342881 | 1727078 | collagen, type V, alpha 3 | Col5a3 | 60379 | 1,35 | down |
| 6693103 | 7342881 | 1727107 | collagen, type V, alpha 3 | Col5a3 | 60379 | 1,48 | down |
| 6697258 | 7342881 | 1727084 | collagen, type V, alpha 3 | Col5a3 | 60379 | 1,35 | down |
| 6706476 | 7342881 | 1727076 | collagen, type V, alpha 3 | Col5a3 | 60379 | 1,06 | up   |

|         |         |         |                            |         |        |      |      |
|---------|---------|---------|----------------------------|---------|--------|------|------|
| 6715093 | 7342881 | 1727087 | collagen, type V, alpha 3  | Col5a3  | 60379  | 1,30 | down |
| 6741528 | 7342881 | 1727122 | collagen, type V, alpha 3  | Col5a3  | 60379  | 1,33 | up   |
| 5796285 | 7217679 | 1417291 | collagen, type VI, alpha 1 | Col6a1  | 294337 | 1,32 | down |
| 5649861 | 7198210 | 1371011 | collagen, type XI, alpha 1 | Coll1a1 | 25654  | 1,46 | down |
| 5693804 | 7198210 | 1371019 | collagen, type XI, alpha 1 | Coll1a1 | 25654  | 1,43 | down |
| 5731305 | 7198210 | 1371018 | collagen, type XI, alpha 1 | Coll1a1 | 25654  | 1,25 | down |
| 5800677 | 7198210 | 1371017 | collagen, type XI, alpha 1 | Coll1a1 | 25654  | 1,06 | down |
| 5951426 | 7198210 | 1371021 | collagen, type XI, alpha 1 | Coll1a1 | 25654  | 1,03 | down |
| 6168189 | 7198210 | 1371020 | collagen, type XI, alpha 1 | Coll1a1 | 25654  | 1,17 | up   |
| 6168606 | 7198210 | 1371025 | collagen, type XI, alpha 1 | Coll1a1 | 25654  | 1,04 | up   |
| 6281955 | 7198210 | 1371023 | collagen, type XI, alpha 1 | Coll1a1 | 25654  | 1,09 | down |
| 6289981 | 7198210 | 1371024 | collagen, type XI, alpha 1 | Coll1a1 | 25654  | 1,07 | down |
| 6291861 | 7198210 | 1371016 | collagen, type XI, alpha 1 | Coll1a1 | 25654  | 1,03 | up   |
| 6329034 | 7198210 | 1371022 | collagen, type XI, alpha 1 | Coll1a1 | 25654  | 1,13 | up   |
| 6335909 | 7198210 | 1371026 | collagen, type XI, alpha 1 | Coll1a1 | 25654  | 1,01 | down |
| 6368634 | 7198210 | 1371013 | collagen, type XI, alpha 1 | Coll1a1 | 25654  | 1,02 | down |
| 6379452 | 7198210 | 1371014 | collagen, type XI, alpha 1 | Coll1a1 | 25654  | 1,04 | down |
| 6546600 | 7198210 | 1371012 | collagen, type XI, alpha 1 | Coll1a1 | 25654  | 1,05 | down |
| 5640150 | 7220967 | 1425182 | collagen, type XI, alpha 2 | Coll1a2 | 294279 | 1,08 | up   |
| 5640621 | 7220967 | 1425196 | collagen, type XI, alpha 2 | Coll1a2 | 294279 | 1,02 | down |
| 5673740 | 7220967 | 1425166 | collagen, type XI, alpha 2 | Coll1a2 | 294279 | 1,01 | down |
| 5675395 | 7220967 | 1425188 | collagen, type XI, alpha 2 | Coll1a2 | 294279 | 1,24 | up   |
| 5698202 | 7220967 | 1425152 | collagen, type XI, alpha 2 | Coll1a2 | 294279 | 1,05 | down |
| 5699424 | 7220967 | 1425165 | collagen, type XI, alpha 2 | Coll1a2 | 294279 | 1,42 | down |
| 5708845 | 7220967 | 1425169 | collagen, type XI, alpha 2 | Coll1a2 | 294279 | 1,40 | up   |
| 5717971 | 7220967 | 1425154 | collagen, type XI, alpha 2 | Coll1a2 | 294279 | 1,18 | up   |
| 5775392 | 7220967 | 1425160 | collagen, type XI, alpha 2 | Coll1a2 | 294279 | 1,00 | up   |
| 5791764 | 7220967 | 1425190 | collagen, type XI, alpha 2 | Coll1a2 | 294279 | 1,33 | up   |
| 5810114 | 7220967 | 1425176 | collagen, type XI, alpha 2 | Coll1a2 | 294279 | 1,05 | down |
| 5817474 | 7220967 | 1425158 | collagen, type XI, alpha 2 | Coll1a2 | 294279 | 1,22 | down |
| 5842562 | 7220967 | 1425184 | collagen, type XI, alpha 2 | Coll1a2 | 294279 | 1,10 | down |
| 5843681 | 7220967 | 1425147 | collagen, type XI, alpha 2 | Coll1a2 | 294279 | 1,12 | down |
| 5855075 | 7220967 | 1425201 | collagen, type XI, alpha 2 | Coll1a2 | 294279 | 1,43 | down |
| 5863208 | 7220967 | 1425153 | collagen, type XI, alpha 2 | Coll1a2 | 294279 | 1,13 | up   |
| 5864422 | 7220967 | 1425171 | collagen, type XI, alpha 2 | Coll1a2 | 294279 | 1,11 | down |
| 5930362 | 7220967 | 1425203 | collagen, type XI, alpha 2 | Coll1a2 | 294279 | 1,25 | down |
| 5933376 | 7220967 | 1425193 | collagen, type XI, alpha 2 | Coll1a2 | 294279 | 1,11 | up   |
| 5935438 | 7220967 | 1425199 | collagen, type XI, alpha 2 | Coll1a2 | 294279 | 1,08 | up   |
| 5944110 | 7220967 | 1425161 | collagen, type XI, alpha 2 | Coll1a2 | 294279 | 1,30 | down |
| 6037941 | 7220967 | 1425164 | collagen, type XI, alpha 2 | Coll1a2 | 294279 | 1,66 | down |
| 6073964 | 7220967 | 1425168 | collagen, type XI, alpha 2 | Coll1a2 | 294279 | 1,04 | up   |
| 6083800 | 7220967 | 1425186 | collagen, type XI, alpha 2 | Coll1a2 | 294279 | 1,23 | down |
| 6135432 | 7220967 | 1425191 | collagen, type XI, alpha 2 | Coll1a2 | 294279 | 1,35 | down |
| 6148838 | 7220967 | 1425195 | collagen, type XI, alpha 2 | Coll1a2 | 294279 | 1,47 | down |
| 6186018 | 7220967 | 1425151 | collagen, type XI, alpha 2 | Coll1a2 | 294279 | 1,85 | down |
| 6191351 | 7220967 | 1425157 | collagen, type XI, alpha 2 | Coll1a2 | 294279 | 1,10 | up   |
| 6204931 | 7220967 | 1425165 | collagen, type XI, alpha 2 | Coll1a2 | 294279 | 1,10 | down |
| 6229507 | 7220967 | 1425204 | collagen, type XI, alpha 2 | Coll1a2 | 294279 | 1,09 | down |
| 6239380 | 7220967 | 1425174 | collagen, type XI, alpha 2 | Coll1a2 | 294279 | 1,05 | down |
| 6247161 | 7220967 | 1425206 | collagen, type XI, alpha 2 | Coll1a2 | 294279 | 1,32 | up   |
| 6255563 | 7220967 | 1425198 | collagen, type XI, alpha 2 | Coll1a2 | 294279 | 1,01 | up   |
| 6259929 | 7220967 | 1425177 | collagen, type XI, alpha 2 | Coll1a2 | 294279 | 1,04 | down |
| 6263167 | 7220967 | 1425150 | collagen, type XI, alpha 2 | Coll1a2 | 294279 | 1,62 | down |
| 6266813 | 7220967 | 1425207 | collagen, type XI, alpha 2 | Coll1a2 | 294279 | 1,34 | up   |
| 6287361 | 7220967 | 1425189 | collagen, type XI, alpha 2 | Coll1a2 | 294279 | 1,07 | up   |
| 6298772 | 7220967 | 1425192 | collagen, type XI, alpha 2 | Coll1a2 | 294279 | 1,35 | down |

|         |         |         |                             |          |        |      |      |
|---------|---------|---------|-----------------------------|----------|--------|------|------|
| 6312799 | 7220967 | 1425202 | collagen, type XI, alpha 2  | Coll1a2  | 294279 | 1,15 | up   |
| 6326711 | 7220967 | 1425200 | collagen, type XI, alpha 2  | Coll1a2  | 294279 | 1,11 | down |
| 6330471 | 7220967 | 1425167 | collagen, type XI, alpha 2  | Coll1a2  | 294279 | 1,00 | down |
| 6342330 | 7220967 | 1425181 | collagen, type XI, alpha 2  | Coll1a2  | 294279 | 1,10 | up   |
| 6358386 | 7220967 | 1425162 | collagen, type XI, alpha 2  | Coll1a2  | 294279 | 1,66 | up   |
| 6395521 | 7220967 | 1425179 | collagen, type XI, alpha 2  | Coll1a2  | 294279 | 1,32 | down |
| 6406093 | 7220967 | 1425178 | collagen, type XI, alpha 2  | Coll1a2  | 294279 | 1,12 | down |
| 6426571 | 7220967 | 1425146 | collagen, type XI, alpha 2  | Coll1a2  | 294279 | 1,36 | up   |
| 6440199 | 7220967 | 1425183 | collagen, type XI, alpha 2  | Coll1a2  | 294279 | 1,09 | down |
| 6491056 | 7220967 | 1425163 | collagen, type XI, alpha 2  | Coll1a2  | 294279 | 1,03 | down |
| 6506188 | 7220967 | 1425159 | collagen, type XI, alpha 2  | Coll1a2  | 294279 | 1,04 | up   |
| 6518860 | 7220967 | 1425180 | collagen, type XI, alpha 2  | Coll1a2  | 294279 | 1,13 | up   |
| 6519298 | 7220967 | 1425207 | collagen, type XI, alpha 2  | Coll1a2  | 294279 | 1,33 | up   |
| 6524706 | 7220967 | 1425155 | collagen, type XI, alpha 2  | Coll1a2  | 294279 | 1,32 | down |
| 6537755 | 7220967 | 1425148 | collagen, type XI, alpha 2  | Coll1a2  | 294279 | 1,55 | down |
| 6548085 | 7220967 | 1425175 | collagen, type XI, alpha 2  | Coll1a2  | 294279 | 1,02 | up   |
| 6548570 | 7220967 | 1425149 | collagen, type XI, alpha 2  | Coll1a2  | 294279 | 1,89 | down |
| 6552270 | 7220967 | 1425205 | collagen, type XI, alpha 2  | Coll1a2  | 294279 | 1,16 | down |
| 6558214 | 7220967 | 1425185 | collagen, type XI, alpha 2  | Coll1a2  | 294279 | 1,03 | down |
| 6607963 | 7220967 | 1425197 | collagen, type XI, alpha 2  | Coll1a2  | 294279 | 1,04 | up   |
| 6628047 | 7220967 | 1425156 | collagen, type XI, alpha 2  | Coll1a2  | 294279 | 1,06 | down |
| 6642252 | 7220967 | 1425173 | collagen, type XI, alpha 2  | Coll1a2  | 294279 | 1,12 | up   |
| 6675169 | 7220967 | 1425170 | collagen, type XI, alpha 2  | Coll1a2  | 294279 | 1,10 | up   |
| 6686636 | 7220967 | 1425172 | collagen, type XI, alpha 2  | Coll1a2  | 294279 | 1,54 | up   |
| 6688942 | 7220967 | 1425187 | collagen, type XI, alpha 2  | Coll1a2  | 294279 | 3,23 | down |
| 6695077 | 7220967 | 1425194 | collagen, type XI, alpha 2  | Coll1a2  | 294279 | 1,09 | down |
| 5621493 | 7317088 | 1664999 | collagen, type XIV, alpha 1 | Coll14a1 | 314981 | 1,21 | up   |
| 5658514 | 7317088 | 1665035 | collagen, type XIV, alpha 1 | Coll14a1 | 314981 | 1,08 | down |
| 5677716 | 7317088 | 1665036 | collagen, type XIV, alpha 1 | Coll14a1 | 314981 | 1,03 | down |
| 5735288 | 7317088 | 1665008 | collagen, type XIV, alpha 1 | Coll14a1 | 314981 | 1,06 | up   |
| 5758373 | 7317088 | 1665051 | collagen, type XIV, alpha 1 | Coll14a1 | 314981 | 1,13 | down |
| 5761536 | 7317088 | 1665018 | collagen, type XIV, alpha 1 | Coll14a1 | 314981 | 1,17 | down |
| 5784668 | 7317088 | 1665057 | collagen, type XIV, alpha 1 | Coll14a1 | 314981 | 1,60 | up   |
| 5789875 | 7317088 | 1665016 | collagen, type XIV, alpha 1 | Coll14a1 | 314981 | 1,42 | up   |
| 5790048 | 7317088 | 1665001 | collagen, type XIV, alpha 1 | Coll14a1 | 314981 | 1,03 | up   |
| 5827210 | 7317088 | 1665025 | collagen, type XIV, alpha 1 | Coll14a1 | 314981 | 1,35 | down |
| 5850830 | 7317088 | 1664995 | collagen, type XIV, alpha 1 | Coll14a1 | 314981 | 1,57 | up   |
| 5904477 | 7317088 | 1665020 | collagen, type XIV, alpha 1 | Coll14a1 | 314981 | 1,21 | up   |
| 5905993 | 7317088 | 1665034 | collagen, type XIV, alpha 1 | Coll14a1 | 314981 | 1,10 | down |
| 5909981 | 7317088 | 1665059 | collagen, type XIV, alpha 1 | Coll14a1 | 314981 | 1,43 | up   |
| 5950544 | 7317088 | 1665002 | collagen, type XIV, alpha 1 | Coll14a1 | 314981 | 1,98 | down |
| 5958003 | 7317088 | 1665021 | collagen, type XIV, alpha 1 | Coll14a1 | 314981 | 1,06 | down |
| 5962673 | 7317088 | 1664998 | collagen, type XIV, alpha 1 | Coll14a1 | 314981 | 1,76 | down |
| 5969703 | 7317088 | 1665027 | collagen, type XIV, alpha 1 | Coll14a1 | 314981 | 1,07 | down |
| 5971199 | 7317088 | 1665039 | collagen, type XIV, alpha 1 | Coll14a1 | 314981 | 1,07 | up   |
| 5986792 | 7317088 | 1665032 | collagen, type XIV, alpha 1 | Coll14a1 | 314981 | 1,18 | up   |
| 6018208 | 7317088 | 1664997 | collagen, type XIV, alpha 1 | Coll14a1 | 314981 | 1,18 | up   |
| 6093387 | 7317088 | 1665051 | collagen, type XIV, alpha 1 | Coll14a1 | 314981 | 2,54 | down |
| 6111207 | 7317088 | 1665056 | collagen, type XIV, alpha 1 | Coll14a1 | 314981 | 1,27 | down |
| 6119125 | 7317088 | 1665042 | collagen, type XIV, alpha 1 | Coll14a1 | 314981 | 1,13 | down |
| 6143383 | 7317088 | 1664998 | collagen, type XIV, alpha 1 | Coll14a1 | 314981 | 1,50 | down |
| 6147300 | 7317088 | 1665024 | collagen, type XIV, alpha 1 | Coll14a1 | 314981 | 1,15 | up   |
| 6148884 | 7317088 | 1665028 | collagen, type XIV, alpha 1 | Coll14a1 | 314981 | 1,12 | down |
| 6187768 | 7317088 | 1665022 | collagen, type XIV, alpha 1 | Coll14a1 | 314981 | 1,13 | up   |
| 6204342 | 7317088 | 1665009 | collagen, type XIV, alpha 1 | Coll14a1 | 314981 | 1,21 | up   |
| 6222930 | 7317088 | 1665011 | collagen, type XIV, alpha 1 | Coll14a1 | 314981 | 1,27 | up   |

|         |         |         |                              |          |        |      |      |
|---------|---------|---------|------------------------------|----------|--------|------|------|
| 6223446 | 7317088 | 1664991 | collagen, type XIV, alpha 1  | Coll14a1 | 314981 | 1,15 | down |
| 6236204 | 7317088 | 1665037 | collagen, type XIV, alpha 1  | Coll14a1 | 314981 | 1,12 | up   |
| 6283297 | 7317088 | 1665030 | collagen, type XIV, alpha 1  | Coll14a1 | 314981 | 1,00 | down |
| 6313130 | 7317088 | 1665007 | collagen, type XIV, alpha 1  | Coll14a1 | 314981 | 1,15 | up   |
| 6325692 | 7317088 | 1664993 | collagen, type XIV, alpha 1  | Coll14a1 | 314981 | 1,29 | up   |
| 6327391 | 7317088 | 1665012 | collagen, type XIV, alpha 1  | Coll14a1 | 314981 | 1,03 | down |
| 6337490 | 7317088 | 1665000 | collagen, type XIV, alpha 1  | Coll14a1 | 314981 | 1,31 | down |
| 6364320 | 7317088 | 1665060 | collagen, type XIV, alpha 1  | Coll14a1 | 314981 | 1,00 | up   |
| 6370246 | 7317088 | 1665047 | collagen, type XIV, alpha 1  | Coll14a1 | 314981 | 1,39 | up   |
| 6375106 | 7317088 | 1665029 | collagen, type XIV, alpha 1  | Coll14a1 | 314981 | 2,27 | down |
| 6392734 | 7317088 | 1664987 | collagen, type XIV, alpha 1  | Coll14a1 | 314981 | 1,25 | up   |
| 6393779 | 7317088 | 1665041 | collagen, type XIV, alpha 1  | Coll14a1 | 314981 | 1,25 | up   |
| 6526986 | 7317088 | 1664996 | collagen, type XIV, alpha 1  | Coll14a1 | 314981 | 1,49 | up   |
| 6528062 | 7317088 | 1665017 | collagen, type XIV, alpha 1  | Coll14a1 | 314981 | 1,00 | up   |
| 6532825 | 7317088 | 1665026 | collagen, type XIV, alpha 1  | Coll14a1 | 314981 | 1,38 | up   |
| 6612650 | 7317088 | 1664994 | collagen, type XIV, alpha 1  | Coll14a1 | 314981 | 1,77 | down |
| 6626380 | 7317088 | 1664990 | collagen, type XIV, alpha 1  | Coll14a1 | 314981 | 1,61 | down |
| 6726890 | 7317088 | 1665048 | collagen, type XIV, alpha 1  | Coll14a1 | 314981 | 1,12 | up   |
| 6738432 | 7317088 | 1664986 | collagen, type XIV, alpha 1  | Coll14a1 | 314981 | 1,24 | up   |
| 5665185 | 7274892 | 1559584 | collagen, type XV, alpha 1   | Coll15a1 | 298069 | 1,10 | up   |
| 5703435 | 7274892 | 1559585 | collagen, type XV, alpha 1   | Coll15a1 | 298069 | 1,09 | up   |
| 6359781 | 7274892 | 1559585 | collagen, type XV, alpha 1   | Coll15a1 | 298069 | 1,69 | up   |
| 5618644 | 7279949 | 1572849 | collagen, type XVI, alpha 1  | Coll16a1 | 366474 | 1,09 | down |
| 5621320 | 7279949 | 1572846 | collagen, type XVI, alpha 1  | Coll16a1 | 366474 | 1,49 | down |
| 5634723 | 7279949 | 1572834 | collagen, type XVI, alpha 1  | Coll16a1 | 366474 | 1,02 | up   |
| 5663978 | 7279949 | 1572832 | collagen, type XVI, alpha 1  | Coll16a1 | 366474 | 1,49 | down |
| 5682229 | 7279949 | 1572843 | collagen, type XVI, alpha 1  | Coll16a1 | 366474 | 1,55 | up   |
| 5740776 | 7279949 | 1572846 | collagen, type XVI, alpha 1  | Coll16a1 | 366474 | 1,24 | up   |
| 5772416 | 7279949 | 1572837 | collagen, type XVI, alpha 1  | Coll16a1 | 366474 | 1,07 | up   |
| 5817323 | 7279949 | 1572838 | collagen, type XVI, alpha 1  | Coll16a1 | 366474 | 1,22 | up   |
| 5867221 | 7279949 | 1572830 | collagen, type XVI, alpha 1  | Coll16a1 | 366474 | 1,39 | up   |
| 5925245 | 7279949 | 1572848 | collagen, type XVI, alpha 1  | Coll16a1 | 366474 | 1,06 | up   |
| 5935269 | 7279949 | 1572831 | collagen, type XVI, alpha 1  | Coll16a1 | 366474 | 1,28 | up   |
| 5983989 | 7279949 | 1572846 | collagen, type XVI, alpha 1  | Coll16a1 | 366474 | 1,37 | down |
| 6056656 | 7279949 | 1572835 | collagen, type XVI, alpha 1  | Coll16a1 | 366474 | 1,11 | up   |
| 6142734 | 7279949 | 1572842 | collagen, type XVI, alpha 1  | Coll16a1 | 366474 | 1,02 | down |
| 6333650 | 7279949 | 1572847 | collagen, type XVI, alpha 1  | Coll16a1 | 366474 | 1,18 | down |
| 6354976 | 7279949 | 1572833 | collagen, type XVI, alpha 1  | Coll16a1 | 366474 | 1,41 | up   |
| 6357297 | 7279949 | 1572841 | collagen, type XVI, alpha 1  | Coll16a1 | 366474 | 1,16 | down |
| 6372314 | 7279949 | 1572845 | collagen, type XVI, alpha 1  | Coll16a1 | 366474 | 1,09 | up   |
| 6441722 | 7279949 | 1572840 | collagen, type XVI, alpha 1  | Coll16a1 | 366474 | 1,29 | down |
| 6451490 | 7279949 | 1572830 | collagen, type XVI, alpha 1  | Coll16a1 | 366474 | 1,18 | up   |
| 6589129 | 7279949 | 1572844 | collagen, type XVI, alpha 1  | Coll16a1 | 366474 | 1,11 | up   |
| 6609210 | 7279949 | 1572839 | collagen, type XVI, alpha 1  | Coll16a1 | 366474 | 1,40 | down |
| 6624026 | 7279949 | 1572836 | collagen, type XVI, alpha 1  | Coll16a1 | 366474 | 2,18 | down |
| 5618009 | 7063515 | 1039695 | collagen, type XVII, alpha 1 | Coll17a1 | 294027 | 1,08 | up   |
| 5627488 | 7063515 | 1039686 | collagen, type XVII, alpha 1 | Coll17a1 | 294027 | 1,01 | up   |
| 5631731 | 7063515 | 1039674 | collagen, type XVII, alpha 1 | Coll17a1 | 294027 | 1,41 | up   |
| 5643237 | 7063515 | 1039658 | collagen, type XVII, alpha 1 | Coll17a1 | 294027 | 1,03 | down |
| 5645386 | 7063515 | 1039654 | collagen, type XVII, alpha 1 | Coll17a1 | 294027 | 1,02 | up   |
| 5684998 | 7063515 | 1039661 | collagen, type XVII, alpha 1 | Coll17a1 | 294027 | 1,13 | up   |
| 5733645 | 7063515 | 1039642 | collagen, type XVII, alpha 1 | Coll17a1 | 294027 | 1,19 | down |
| 5736274 | 7063515 | 1039677 | collagen, type XVII, alpha 1 | Coll17a1 | 294027 | 1,07 | up   |
| 5740238 | 7063515 | 1039645 | collagen, type XVII, alpha 1 | Coll17a1 | 294027 | 2,02 | down |
| 5743987 | 7063515 | 1039681 | collagen, type XVII, alpha 1 | Coll17a1 | 294027 | 1,08 | up   |
| 5744048 | 7063515 | 1039634 | collagen, type XVII, alpha 1 | Coll17a1 | 294027 | 1,41 | up   |

|         |         |         |                               |         |        |      |      |
|---------|---------|---------|-------------------------------|---------|--------|------|------|
| 5749099 | 7063515 | 1039633 | collagen, type XVII, alpha 1  | Col17a1 | 294027 | 1,36 | up   |
| 5751430 | 7063515 | 1039671 | collagen, type XVII, alpha 1  | Col17a1 | 294027 | 1,25 | down |
| 5754524 | 7063515 | 1039641 | collagen, type XVII, alpha 1  | Col17a1 | 294027 | 1,02 | up   |
| 5779224 | 7063515 | 1039651 | collagen, type XVII, alpha 1  | Col17a1 | 294027 | 3,03 | down |
| 5825796 | 7063515 | 1039671 | collagen, type XVII, alpha 1  | Col17a1 | 294027 | 1,14 | down |
| 5867174 | 7063515 | 1039640 | collagen, type XVII, alpha 1  | Col17a1 | 294027 | 1,59 | down |
| 5877110 | 7063515 | 1039678 | collagen, type XVII, alpha 1  | Col17a1 | 294027 | 1,20 | down |
| 5899682 | 7063515 | 1039669 | collagen, type XVII, alpha 1  | Col17a1 | 294027 | 1,35 | down |
| 5906970 | 7063515 | 1039689 | collagen, type XVII, alpha 1  | Col17a1 | 294027 | 1,37 | up   |
| 5931100 | 7063515 | 1039683 | collagen, type XVII, alpha 1  | Col17a1 | 294027 | 1,19 | down |
| 5934359 | 7063515 | 1039664 | collagen, type XVII, alpha 1  | Col17a1 | 294027 | 1,52 | up   |
| 5943709 | 7063515 | 1039659 | collagen, type XVII, alpha 1  | Col17a1 | 294027 | 1,06 | down |
| 5954731 | 7063515 | 1039685 | collagen, type XVII, alpha 1  | Col17a1 | 294027 | 1,03 | down |
| 5955379 | 7063515 | 1039647 | collagen, type XVII, alpha 1  | Col17a1 | 294027 | 1,02 | up   |
| 5961202 | 7063515 | 1039687 | collagen, type XVII, alpha 1  | Col17a1 | 294027 | 1,17 | up   |
| 6005225 | 7063515 | 1039650 | collagen, type XVII, alpha 1  | Col17a1 | 294027 | 1,17 | down |
| 6008309 | 7063515 | 1039683 | collagen, type XVII, alpha 1  | Col17a1 | 294027 | 1,74 | up   |
| 6084825 | 7063515 | 1039691 | collagen, type XVII, alpha 1  | Col17a1 | 294027 | 1,22 | up   |
| 6134280 | 7063515 | 1039667 | collagen, type XVII, alpha 1  | Col17a1 | 294027 | 1,43 | down |
| 6145586 | 7063515 | 1039631 | collagen, type XVII, alpha 1  | Col17a1 | 294027 | 1,79 | down |
| 6175254 | 7063515 | 1039675 | collagen, type XVII, alpha 1  | Col17a1 | 294027 | 1,02 | up   |
| 6175522 | 7063515 | 1039648 | collagen, type XVII, alpha 1  | Col17a1 | 294027 | 1,02 | down |
| 6193830 | 7063515 | 1039637 | collagen, type XVII, alpha 1  | Col17a1 | 294027 | 1,07 | up   |
| 6220512 | 7063515 | 1039688 | collagen, type XVII, alpha 1  | Col17a1 | 294027 | 1,33 | up   |
| 6221746 | 7063515 | 1039632 | collagen, type XVII, alpha 1  | Col17a1 | 294027 | 1,06 | down |
| 6224323 | 7063515 | 1039630 | collagen, type XVII, alpha 1  | Col17a1 | 294027 | 1,07 | down |
| 6253013 | 7063515 | 1039672 | collagen, type XVII, alpha 1  | Col17a1 | 294027 | 1,14 | down |
| 6259998 | 7063515 | 1039644 | collagen, type XVII, alpha 1  | Col17a1 | 294027 | 1,18 | down |
| 6267715 | 7063515 | 1039630 | collagen, type XVII, alpha 1  | Col17a1 | 294027 | 1,34 | down |
| 6277781 | 7063515 | 1039670 | collagen, type XVII, alpha 1  | Col17a1 | 294027 | 1,30 | up   |
| 6286990 | 7063515 | 1039662 | collagen, type XVII, alpha 1  | Col17a1 | 294027 | 1,23 | down |
| 6302546 | 7063515 | 1039649 | collagen, type XVII, alpha 1  | Col17a1 | 294027 | 1,07 | down |
| 6385564 | 7063515 | 1039672 | collagen, type XVII, alpha 1  | Col17a1 | 294027 | 1,01 | up   |
| 6389292 | 7063515 | 1039646 | collagen, type XVII, alpha 1  | Col17a1 | 294027 | 2,08 | down |
| 6402861 | 7063515 | 1039635 | collagen, type XVII, alpha 1  | Col17a1 | 294027 | 1,29 | up   |
| 6436277 | 7063515 | 1039666 | collagen, type XVII, alpha 1  | Col17a1 | 294027 | 1,03 | down |
| 6489602 | 7063515 | 1039655 | collagen, type XVII, alpha 1  | Col17a1 | 294027 | 1,19 | down |
| 6493236 | 7063515 | 1039660 | collagen, type XVII, alpha 1  | Col17a1 | 294027 | 1,06 | up   |
| 6527036 | 7063515 | 1039638 | collagen, type XVII, alpha 1  | Col17a1 | 294027 | 1,13 | up   |
| 6528434 | 7063515 | 1039630 | collagen, type XVII, alpha 1  | Col17a1 | 294027 | 1,03 | up   |
| 6542354 | 7063515 | 1039684 | collagen, type XVII, alpha 1  | Col17a1 | 294027 | 1,08 | up   |
| 6595702 | 7063515 | 1039679 | collagen, type XVII, alpha 1  | Col17a1 | 294027 | 1,61 | up   |
| 6640064 | 7063515 | 1039656 | collagen, type XVII, alpha 1  | Col17a1 | 294027 | 1,47 | down |
| 6670338 | 7063515 | 1039672 | collagen, type XVII, alpha 1  | Col17a1 | 294027 | 1,01 | up   |
| 6686578 | 7063515 | 1039657 | collagen, type XVII, alpha 1  | Col17a1 | 294027 | 1,53 | up   |
| 6700232 | 7063515 | 1039672 | collagen, type XVII, alpha 1  | Col17a1 | 294027 | 1,29 | down |
| 6703576 | 7063515 | 1039690 | collagen, type XVII, alpha 1  | Col17a1 | 294027 | 1,02 | up   |
| 6710849 | 7063515 | 1039639 | collagen, type XVII, alpha 1  | Col17a1 | 294027 | 1,02 | down |
| 5871086 | 7217650 | 1417208 | collagen, type XVIII, alpha 1 | Col18a1 | 85251  | 1,88 | down |
| 6206572 | 7217650 | 1417210 | collagen, type XVIII, alpha 1 | Col18a1 | 85251  | 1,02 | down |
| 6382958 | 7217650 | 1417207 | collagen, type XVIII, alpha 1 | Col18a1 | 85251  | 1,20 | down |
| 6508253 | 7217650 | 1417209 | collagen, type XVIII, alpha 1 | Col18a1 | 85251  | 1,52 | down |
| 5626226 | 7236358 | 1464230 | collagen, type XX, alpha 1    | Col20a1 | 311716 | 1,16 | up   |
| 5649301 | 7236358 | 1464232 | collagen, type XX, alpha 1    | Col20a1 | 311716 | 1,46 | up   |
| 5745971 | 7236358 | 1464233 | collagen, type XX, alpha 1    | Col20a1 | 311716 | 1,12 | down |
| 5775144 | 7236358 | 1464221 | collagen, type XX, alpha 1    | Col20a1 | 311716 | 1,05 | up   |



|         |         |         |                              |         |        |      |      |
|---------|---------|---------|------------------------------|---------|--------|------|------|
| 5834347 | 7236358 | 1464224 | collagen, type XX, alpha 1   | Col20a1 | 311716 | 1,18 | up   |
| 5896456 | 7236358 | 1464233 | collagen, type XX, alpha 1   | Col20a1 | 311716 | 1,12 | down |
| 6107848 | 7236358 | 1464231 | collagen, type XX, alpha 1   | Col20a1 | 311716 | 1,07 | up   |
| 6301504 | 7236358 | 1464218 | collagen, type XX, alpha 1   | Col20a1 | 311716 | 1,06 | up   |
| 6436922 | 7236358 | 1464234 | collagen, type XX, alpha 1   | Col20a1 | 311716 | 1,18 | down |
| 6490537 | 7236358 | 1464228 | collagen, type XX, alpha 1   | Col20a1 | 311716 | 1,25 | down |
| 6527300 | 7236358 | 1464222 | collagen, type XX, alpha 1   | Col20a1 | 311716 | 1,53 | up   |
| 6542102 | 7236358 | 1464223 | collagen, type XX, alpha 1   | Col20a1 | 311716 | 1,02 | down |
| 6611285 | 7236358 | 1464229 | collagen, type XX, alpha 1   | Col20a1 | 311716 | 1,21 | down |
| 6661860 | 7236358 | 1464233 | collagen, type XX, alpha 1   | Col20a1 | 311716 | 1,68 | up   |
| 6704813 | 7236358 | 1464226 | collagen, type XX, alpha 1   | Col20a1 | 311716 | 1,51 | up   |
| 6745977 | 7236358 | 1464218 | collagen, type XX, alpha 1   | Col20a1 | 311716 | 1,22 | up   |
| 5628264 | 7328695 | 1692358 | collagen, type XXII, alpha 1 | Col22a1 | 315071 | 1,02 | up   |
| 5638399 | 7328695 | 1692360 | collagen, type XXII, alpha 1 | Col22a1 | 315071 | 1,24 | up   |
| 5653714 | 7328695 | 1692269 | collagen, type XXII, alpha 1 | Col22a1 | 315071 | 1,42 | up   |
| 5680343 | 7328695 | 1692274 | collagen, type XXII, alpha 1 | Col22a1 | 315071 | 1,50 | down |
| 5685827 | 7328695 | 1692279 | collagen, type XXII, alpha 1 | Col22a1 | 315071 | 1,27 | down |
| 5691586 | 7328695 | 1692350 | collagen, type XXII, alpha 1 | Col22a1 | 315071 | 1,05 | down |
| 5693388 | 7328695 | 1692331 | collagen, type XXII, alpha 1 | Col22a1 | 315071 | 1,04 | up   |
| 5708138 | 7328695 | 1692281 | collagen, type XXII, alpha 1 | Col22a1 | 315071 | 1,04 | up   |
| 5750213 | 7328695 | 1692319 | collagen, type XXII, alpha 1 | Col22a1 | 315071 | 1,25 | down |
| 5803468 | 7328695 | 1692282 | collagen, type XXII, alpha 1 | Col22a1 | 315071 | 1,13 | up   |
| 5820738 | 7328695 | 1692351 | collagen, type XXII, alpha 1 | Col22a1 | 315071 | 1,22 | down |
| 5822615 | 7328695 | 1692348 | collagen, type XXII, alpha 1 | Col22a1 | 315071 | 1,05 | up   |
| 5845972 | 7328695 | 1692353 | collagen, type XXII, alpha 1 | Col22a1 | 315071 | 1,01 | down |
| 5848169 | 7328695 | 1692366 | collagen, type XXII, alpha 1 | Col22a1 | 315071 | 1,55 | up   |
| 5855845 | 7328695 | 1692283 | collagen, type XXII, alpha 1 | Col22a1 | 315071 | 1,36 | down |
| 5858920 | 7328695 | 1692286 | collagen, type XXII, alpha 1 | Col22a1 | 315071 | 1,04 | down |
| 5888205 | 7328695 | 1692307 | collagen, type XXII, alpha 1 | Col22a1 | 315071 | 1,06 | up   |
| 5895921 | 7328695 | 1692365 | collagen, type XXII, alpha 1 | Col22a1 | 315071 | 1,55 | up   |
| 5922634 | 7328695 | 1692315 | collagen, type XXII, alpha 1 | Col22a1 | 315071 | 1,17 | down |
| 5924338 | 7328695 | 1692333 | collagen, type XXII, alpha 1 | Col22a1 | 315071 | 1,34 | up   |
| 5932214 | 7328695 | 1692278 | collagen, type XXII, alpha 1 | Col22a1 | 315071 | 1,18 | up   |
| 5932661 | 7328695 | 1692369 | collagen, type XXII, alpha 1 | Col22a1 | 315071 | 1,31 | up   |
| 5937465 | 7328695 | 1692325 | collagen, type XXII, alpha 1 | Col22a1 | 315071 | 1,13 | up   |
| 5939201 | 7328695 | 1692349 | collagen, type XXII, alpha 1 | Col22a1 | 315071 | 1,23 | up   |
| 5956733 | 7328695 | 1692272 | collagen, type XXII, alpha 1 | Col22a1 | 315071 | 1,19 | up   |
| 5957431 | 7328695 | 1692276 | collagen, type XXII, alpha 1 | Col22a1 | 315071 | 1,02 | down |
| 5995648 | 7328695 | 1692354 | collagen, type XXII, alpha 1 | Col22a1 | 315071 | 1,08 | down |
| 6002579 | 7328695 | 1692295 | collagen, type XXII, alpha 1 | Col22a1 | 315071 | 1,07 | down |
| 6011608 | 7328695 | 1692347 | collagen, type XXII, alpha 1 | Col22a1 | 315071 | 1,10 | down |
| 6020990 | 7328695 | 1692324 | collagen, type XXII, alpha 1 | Col22a1 | 315071 | 1,52 | up   |
| 6026529 | 7328695 | 1692274 | collagen, type XXII, alpha 1 | Col22a1 | 315071 | 1,30 | down |
| 6056547 | 7328695 | 1692268 | collagen, type XXII, alpha 1 | Col22a1 | 315071 | 1,18 | down |
| 6071683 | 7328695 | 1692267 | collagen, type XXII, alpha 1 | Col22a1 | 315071 | 1,15 | up   |
| 6083504 | 7328695 | 1692337 | collagen, type XXII, alpha 1 | Col22a1 | 315071 | 2,39 | up   |
| 6112152 | 7328695 | 1692306 | collagen, type XXII, alpha 1 | Col22a1 | 315071 | 1,08 | down |
| 6128386 | 7328695 | 1692326 | collagen, type XXII, alpha 1 | Col22a1 | 315071 | 1,32 | up   |
| 6136901 | 7328695 | 1692359 | collagen, type XXII, alpha 1 | Col22a1 | 315071 | 1,06 | up   |
| 6138841 | 7328695 | 1692269 | collagen, type XXII, alpha 1 | Col22a1 | 315071 | 1,41 | down |
| 6197435 | 7328695 | 1692372 | collagen, type XXII, alpha 1 | Col22a1 | 315071 | 1,37 | up   |
| 6257760 | 7328695 | 1692330 | collagen, type XXII, alpha 1 | Col22a1 | 315071 | 1,00 | up   |
| 6292005 | 7328695 | 1692328 | collagen, type XXII, alpha 1 | Col22a1 | 315071 | 1,08 | down |
| 6298964 | 7328695 | 1692356 | collagen, type XXII, alpha 1 | Col22a1 | 315071 | 1,06 | down |
| 6320408 | 7328695 | 1692299 | collagen, type XXII, alpha 1 | Col22a1 | 315071 | 1,42 | up   |
| 6336616 | 7328695 | 1692339 | collagen, type XXII, alpha 1 | Col22a1 | 315071 | 1,36 | up   |

|         |         |         |                                          |         |        |      |      |
|---------|---------|---------|------------------------------------------|---------|--------|------|------|
| 6339452 | 7328695 | 1692348 | collagen, type XXII, alpha 1             | Col22a1 | 315071 | 1,20 | down |
| 6363569 | 7328695 | 1692294 | collagen, type XXII, alpha 1             | Col22a1 | 315071 | 1,48 | down |
| 6363768 | 7328695 | 1692312 | collagen, type XXII, alpha 1             | Col22a1 | 315071 | 1,44 | up   |
| 6443838 | 7328695 | 1692302 | collagen, type XXII, alpha 1             | Col22a1 | 315071 | 1,28 | up   |
| 6455302 | 7328695 | 1692327 | collagen, type XXII, alpha 1             | Col22a1 | 315071 | 1,19 | down |
| 6481769 | 7328695 | 1692340 | collagen, type XXII, alpha 1             | Col22a1 | 315071 | 1,24 | up   |
| 6494911 | 7328695 | 1692299 | collagen, type XXII, alpha 1             | Col22a1 | 315071 | 1,13 | down |
| 6498621 | 7328695 | 1692329 | collagen, type XXII, alpha 1             | Col22a1 | 315071 | 1,12 | down |
| 6508181 | 7328695 | 1692317 | collagen, type XXII, alpha 1             | Col22a1 | 315071 | 1,08 | up   |
| 6511982 | 7328695 | 1692305 | collagen, type XXII, alpha 1             | Col22a1 | 315071 | 1,01 | down |
| 6554961 | 7328695 | 1692280 | collagen, type XXII, alpha 1             | Col22a1 | 315071 | 1,28 | down |
| 6657584 | 7328695 | 1692298 | collagen, type XXII, alpha 1             | Col22a1 | 315071 | 1,64 | up   |
| 6659561 | 7328695 | 1692380 | collagen, type XXII, alpha 1             | Col22a1 | 315071 | 1,14 | down |
| 6672784 | 7328695 | 1692291 | collagen, type XXII, alpha 1             | Col22a1 | 315071 | 1,50 | down |
| 6698358 | 7328695 | 1692290 | collagen, type XXII, alpha 1             | Col22a1 | 315071 | 1,15 | up   |
| 6701557 | 7328695 | 1692355 | collagen, type XXII, alpha 1             | Col22a1 | 315071 | 1,46 | down |
| 6706106 | 7328695 | 1692361 | collagen, type XXII, alpha 1             | Col22a1 | 315071 | 1,03 | up   |
| 6710236 | 7328695 | 1692296 | collagen, type XXII, alpha 1             | Col22a1 | 315071 | 1,18 | down |
| 6712010 | 7328695 | 1692362 | collagen, type XXII, alpha 1             | Col22a1 | 315071 | 1,44 | up   |
| 6725168 | 7328695 | 1692322 | collagen, type XXII, alpha 1             | Col22a1 | 315071 | 1,31 | up   |
| 6746704 | 7328695 | 1692343 | collagen, type XXII, alpha 1             | Col22a1 | 315071 | 1,43 | down |
| 5674945 | 7067406 | 1049595 | collagen, type XXIII, alpha 1            | Col23a1 | 353303 | 1,20 | down |
| 5711470 | 7067406 | 1049601 | collagen, type XXIII, alpha 1            | Col23a1 | 353303 | 1,02 | up   |
| 5721890 | 7067406 | 1049593 | collagen, type XXIII, alpha 1            | Col23a1 | 353303 | 1,21 | up   |
| 5798192 | 7067406 | 1049587 | collagen, type XXIII, alpha 1            | Col23a1 | 353303 | 1,57 | down |
| 5837708 | 7067406 | 1049577 | collagen, type XXIII, alpha 1            | Col23a1 | 353303 | 1,24 | up   |
| 5865510 | 7067406 | 1049596 | collagen, type XXIII, alpha 1            | Col23a1 | 353303 | 1,02 | up   |
| 6090335 | 7067406 | 1049581 | collagen, type XXIII, alpha 1            | Col23a1 | 353303 | 1,37 | up   |
| 6117157 | 7067406 | 1049600 | collagen, type XXIII, alpha 1            | Col23a1 | 353303 | 1,01 | up   |
| 6146977 | 7067406 | 1049592 | collagen, type XXIII, alpha 1            | Col23a1 | 353303 | 1,02 | up   |
| 6196233 | 7067406 | 1049599 | collagen, type XXIII, alpha 1            | Col23a1 | 353303 | 1,67 | down |
| 6197069 | 7067406 | 1049576 | collagen, type XXIII, alpha 1            | Col23a1 | 353303 | 1,39 | down |
| 6222935 | 7067406 | 1049589 | collagen, type XXIII, alpha 1            | Col23a1 | 353303 | 1,02 | up   |
| 6288089 | 7067406 | 1049575 | collagen, type XXIII, alpha 1            | Col23a1 | 353303 | 1,48 | up   |
| 6297247 | 7067406 | 1049590 | collagen, type XXIII, alpha 1            | Col23a1 | 353303 | 1,06 | up   |
| 6310876 | 7067406 | 1049579 | collagen, type XXIII, alpha 1            | Col23a1 | 353303 | 1,02 | down |
| 6341994 | 7067406 | 1049585 | collagen, type XXIII, alpha 1            | Col23a1 | 353303 | 1,10 | down |
| 6443464 | 7067406 | 1049583 | collagen, type XXIII, alpha 1            | Col23a1 | 353303 | 1,21 | down |
| 6457727 | 7067406 | 1049578 | collagen, type XXIII, alpha 1            | Col23a1 | 353303 | 1,41 | up   |
| 6527175 | 7067406 | 1049586 | collagen, type XXIII, alpha 1            | Col23a1 | 353303 | 1,07 | up   |
| 6586548 | 7067406 | 1049597 | collagen, type XXIII, alpha 1            | Col23a1 | 353303 | 1,21 | down |
| 6591059 | 7067406 | 1049582 | collagen, type XXIII, alpha 1            | Col23a1 | 353303 | 1,13 | down |
| 6605691 | 7067406 | 1049601 | collagen, type XXIII, alpha 1            | Col23a1 | 353303 | 1,13 | up   |
| 6614300 | 7067406 | 1049598 | collagen, type XXIII, alpha 1            | Col23a1 | 353303 | 1,09 | down |
| 6637724 | 7067406 | 1049594 | collagen, type XXIII, alpha 1            | Col23a1 | 353303 | 1,03 | down |
| 6685515 | 7067406 | 1049575 | collagen, type XXIII, alpha 1            | Col23a1 | 353303 | 1,03 | up   |
| 6708536 | 7067406 | 1049584 | collagen, type XXIII, alpha 1            | Col23a1 | 353303 | 1,18 | down |
| 6716987 | 7067406 | 1049580 | collagen, type XXIII, alpha 1            | Col23a1 | 353303 | 1,09 | down |
| 6719074 | 7067406 | 1049588 | collagen, type XXIII, alpha 1            | Col23a1 | 353303 | 2,16 | up   |
| 5645694 | 7212626 | 1404709 | colony stimulating factor 1 (macrophage) | Csf1    | 78965  | 1,31 | down |
| 5713494 | 7212626 | 1404712 | colony stimulating factor 1 (macrophage) | Csf1    | 78965  | 2,86 | down |
| 5742887 | 7212626 | 1404708 | colony stimulating factor 1 (macrophage) | Csf1    | 78965  | 1,96 | down |
| 5774566 | 7212626 | 1404716 | colony stimulating factor 1 (macrophage) | Csf1    | 78965  | 2,44 | up   |
| 5781564 | 7212626 | 1404713 | colony stimulating factor 1 (macrophage) | Csf1    | 78965  | 1,85 | down |
| 5793197 | 7212626 | 1404714 | colony stimulating factor 1 (macrophage) | Csf1    | 78965  | 1,37 | up   |
| 5817698 | 7212626 | 1404716 | colony stimulating factor 1 (macrophage) | Csf1    | 78965  | 1,04 | up   |

|         |         |         |                                              |         |        |      |      |
|---------|---------|---------|----------------------------------------------|---------|--------|------|------|
| 5945323 | 7212626 | 1404708 | colony stimulating factor 1 (macrophage)     | Csf1    | 78965  | 1,08 | up   |
| 6005055 | 7212626 | 1404711 | colony stimulating factor 1 (macrophage)     | Csf1    | 78965  | 1,45 | up   |
| 6075637 | 7212626 | 1404712 | colony stimulating factor 1 (macrophage)     | Csf1    | 78965  | 1,03 | down |
| 6087692 | 7212626 | 1404710 | colony stimulating factor 1 (macrophage)     | Csf1    | 78965  | 1,45 | down |
| 6174544 | 7212626 | 1404716 | colony stimulating factor 1 (macrophage)     | Csf1    | 78965  | 1,25 | down |
| 6232127 | 7212626 | 1404712 | colony stimulating factor 1 (macrophage)     | Csf1    | 78965  | 1,21 | down |
| 6330336 | 7212626 | 1404708 | colony stimulating factor 1 (macrophage)     | Csf1    | 78965  | 1,62 | down |
| 6388120 | 7212626 | 1404712 | colony stimulating factor 1 (macrophage)     | Csf1    | 78965  | 1,65 | up   |
| 6440350 | 7212626 | 1404715 | colony stimulating factor 1 (macrophage)     | Csf1    | 78965  | 1,90 | up   |
| 6446401 | 7212626 | 1404708 | colony stimulating factor 1 (macrophage)     | Csf1    | 78965  | 1,08 | up   |
| 5636902 | 7171034 | 1302297 | colony stimulating factor 1 receptor         | Csflr   | 307403 | 1,12 | up   |
| 5638091 | 7171034 | 1302295 | colony stimulating factor 1 receptor         | Csflr   | 307403 | 1,00 | up   |
| 5667856 | 7171034 | 1302278 | colony stimulating factor 1 receptor         | Csflr   | 307403 | 1,00 | up   |
| 5703899 | 7171034 | 1302289 | colony stimulating factor 1 receptor         | Csflr   | 307403 | 1,21 | down |
| 5732576 | 7171034 | 1302283 | colony stimulating factor 1 receptor         | Csflr   | 307403 | 2,17 | up   |
| 5782265 | 7171034 | 1302276 | colony stimulating factor 1 receptor         | Csflr   | 307403 | 1,05 | up   |
| 5787428 | 7171034 | 1302282 | colony stimulating factor 1 receptor         | Csflr   | 307403 | 1,47 | up   |
| 5811497 | 7171034 | 1302273 | colony stimulating factor 1 receptor         | Csflr   | 307403 | 1,34 | down |
| 5853172 | 7171034 | 1302284 | colony stimulating factor 1 receptor         | Csflr   | 307403 | 1,03 | up   |
| 5868452 | 7171034 | 1302277 | colony stimulating factor 1 receptor         | Csflr   | 307403 | 1,24 | down |
| 5894865 | 7171034 | 1302296 | colony stimulating factor 1 receptor         | Csflr   | 307403 | 1,07 | down |
| 5908800 | 7171034 | 1302279 | colony stimulating factor 1 receptor         | Csflr   | 307403 | 1,12 | up   |
| 5920054 | 7171034 | 1302278 | colony stimulating factor 1 receptor         | Csflr   | 307403 | 1,17 | up   |
| 5921431 | 7171034 | 1302298 | colony stimulating factor 1 receptor         | Csflr   | 307403 | 1,09 | up   |
| 5973937 | 7171034 | 1302275 | colony stimulating factor 1 receptor         | Csflr   | 307403 | 1,24 | up   |
| 6002193 | 7171034 | 1302299 | colony stimulating factor 1 receptor         | Csflr   | 307403 | 1,28 | down |
| 6175247 | 7171034 | 1302298 | colony stimulating factor 1 receptor         | Csflr   | 307403 | 1,01 | up   |
| 6232543 | 7171034 | 1302294 | colony stimulating factor 1 receptor         | Csflr   | 307403 | 1,47 | down |
| 6269811 | 7171034 | 1302290 | colony stimulating factor 1 receptor         | Csflr   | 307403 | 1,18 | down |
| 6274181 | 7171034 | 1302281 | colony stimulating factor 1 receptor         | Csflr   | 307403 | 1,08 | up   |
| 6374968 | 7171034 | 1302299 | colony stimulating factor 1 receptor         | Csflr   | 307403 | 1,16 | up   |
| 6445604 | 7171034 | 1302293 | colony stimulating factor 1 receptor         | Csflr   | 307403 | 1,23 | up   |
| 6502919 | 7171034 | 1302293 | colony stimulating factor 1 receptor         | Csflr   | 307403 | 1,66 | down |
| 6529462 | 7171034 | 1302299 | colony stimulating factor 1 receptor         | Csflr   | 307403 | 1,21 | up   |
| 6618096 | 7171034 | 1302288 | colony stimulating factor 1 receptor         | Csflr   | 307403 | 1,11 | down |
| 6628440 | 7171034 | 1302291 | colony stimulating factor 1 receptor         | Csflr   | 307403 | 1,14 | down |
| 6728482 | 7171034 | 1302280 | colony stimulating factor 1 receptor         | Csflr   | 307403 | 1,06 | up   |
| 6737436 | 7171034 | 1302277 | colony stimulating factor 1 receptor         | Csflr   | 307403 | 1,42 | up   |
| 5771487 | 7318456 | 1668629 | COMM domain containing 5                     | Commmd5 | 245974 | 1,18 | down |
| 5783418 | 7318456 | 1668627 | COMM domain containing 5                     | Commmd5 | 245974 | 1,10 | up   |
| 5830256 | 7318456 | 1668629 | COMM domain containing 5                     | Commmd5 | 245974 | 1,02 | up   |
| 6443279 | 7318456 | 1668628 | COMM domain containing 5                     | Commmd5 | 245974 | 2,23 | down |
| 5687766 | 7118196 | 1172701 | COMM domain containing 8                     | Commmd8 | 289603 | 1,32 | up   |
| 6142254 | 7118196 | 1172698 | COMM domain containing 8                     | Commmd8 | 289603 | 1,18 | up   |
| 6245154 | 7118196 | 1172700 | COMM domain containing 8                     | Commmd8 | 289603 | 1,20 | up   |
| 6410463 | 7118196 | 1172696 | COMM domain containing 8                     | Commmd8 | 289603 | 1,12 | down |
| 6418719 | 7118196 | 1172702 | COMM domain containing 8                     | Commmd8 | 289603 | 1,15 | down |
| 6478020 | 7118196 | 1172696 | COMM domain containing 8                     | Commmd8 | 289603 | 3,47 | down |
| 5632760 | 7115728 | 1166531 | complement component (3b/4b) receptor 1-like | Cr1l    | 54243  | 1,14 | up   |
| 5737674 | 7115728 | 1166525 | complement component (3b/4b) receptor 1-like | Cr1l    | 54243  | 1,04 | down |
| 5879271 | 7115728 | 1166529 | complement component (3b/4b) receptor 1-like | Cr1l    | 54243  | 1,47 | up   |
| 5882845 | 7115728 | 1166524 | complement component (3b/4b) receptor 1-like | Cr1l    | 54243  | 1,02 | up   |
| 5992450 | 7115728 | 1166526 | complement component (3b/4b) receptor 1-like | Cr1l    | 54243  | 1,09 | down |
| 6210062 | 7115728 | 1166528 | complement component (3b/4b) receptor 1-like | Cr1l    | 54243  | 1,01 | up   |
| 6268669 | 7115728 | 1166527 | complement component (3b/4b) receptor 1-like | Cr1l    | 54243  | 1,04 | down |
| 6400969 | 7115728 | 1166522 | complement component (3b/4b) receptor 1-like | Cr1l    | 54243  | 1,22 | down |

|         |         |         |                                              |      |        |       |      |
|---------|---------|---------|----------------------------------------------|------|--------|-------|------|
| 6417267 | 7115728 | 1166522 | complement component (3b/4b) receptor 1-like | Cr1l | 54243  | 1,14  | down |
| 6433755 | 7115728 | 1166532 | complement component (3b/4b) receptor 1-like | Cr1l | 54243  | 1,23  | up   |
| 6523518 | 7115728 | 1166532 | complement component (3b/4b) receptor 1-like | Cr1l | 54243  | 1,80  | down |
| 6554962 | 7115728 | 1166528 | complement component (3b/4b) receptor 1-like | Cr1l | 54243  | 1,67  | down |
| 6629459 | 7115728 | 1166530 | complement component (3b/4b) receptor 1-like | Cr1l | 54243  | 1,30  | up   |
| 6722126 | 7115728 | 1166523 | complement component (3b/4b) receptor 1-like | Cr1l | 54243  | 2,18  | down |
| 5740483 | 7258323 | 1518482 | complement component 1, r subcomponent       | C1r  | 312705 | 1,47  | down |
| 5850274 | 7258323 | 1518471 | complement component 1, r subcomponent       | C1r  | 312705 | 1,44  | up   |
| 5931422 | 7258323 | 1518474 | complement component 1, r subcomponent       | C1r  | 312705 | 1,35  | up   |
| 5939433 | 7258323 | 1518476 | complement component 1, r subcomponent       | C1r  | 312705 | 5,85  | up   |
| 5988892 | 7258323 | 1518482 | complement component 1, r subcomponent       | C1r  | 312705 | 3,59  | up   |
| 6016803 | 7258323 | 1518474 | complement component 1, r subcomponent       | C1r  | 312705 | 1,01  | up   |
| 6080797 | 7258323 | 1518480 | complement component 1, r subcomponent       | C1r  | 312705 | 6,86  | up   |
| 6104957 | 7258323 | 1518478 | complement component 1, r subcomponent       | C1r  | 312705 | 12,73 | up   |
| 6317247 | 7258323 | 1518481 | complement component 1, r subcomponent       | C1r  | 312705 | 1,32  | down |
| 6324241 | 7258323 | 1518475 | complement component 1, r subcomponent       | C1r  | 312705 | 7,87  | up   |
| 6326421 | 7258323 | 1518477 | complement component 1, r subcomponent       | C1r  | 312705 | 3,16  | up   |
| 6706790 | 7258323 | 1518479 | complement component 1, r subcomponent       | C1r  | 312705 | 1,07  | up   |
| 6707899 | 7258323 | 1518477 | complement component 1, r subcomponent       | C1r  | 312705 | 2,09  | up   |
| 5647304 | 7269448 | 1545877 | complement component 1, s subcomponent       | C1s  | 192262 | 1,23  | up   |
| 5662949 | 7269448 | 1545882 | complement component 1, s subcomponent       | C1s  | 192262 | 1,88  | up   |
| 5678326 | 7269448 | 1545876 | complement component 1, s subcomponent       | C1s  | 192262 | 1,10  | up   |
| 5827223 | 7269448 | 1545879 | complement component 1, s subcomponent       | C1s  | 192262 | 1,52  | up   |
| 5851904 | 7269448 | 1545875 | complement component 1, s subcomponent       | C1s  | 192262 | 1,06  | up   |
| 6074943 | 7269448 | 1545881 | complement component 1, s subcomponent       | C1s  | 192262 | 2,44  | up   |
| 6128130 | 7269448 | 1545883 | complement component 1, s subcomponent       | C1s  | 192262 | 2,37  | up   |
| 6139849 | 7269448 | 1545885 | complement component 1, s subcomponent       | C1s  | 192262 | 1,84  | down |
| 6281501 | 7269448 | 1545884 | complement component 1, s subcomponent       | C1s  | 192262 | 2,31  | up   |
| 6313085 | 7269448 | 1545880 | complement component 1, s subcomponent       | C1s  | 192262 | 2,62  | down |
| 6394600 | 7269448 | 1545886 | complement component 1, s subcomponent       | C1s  | 192262 | 3,82  | down |
| 6471210 | 7269448 | 1545878 | complement component 1, s subcomponent       | C1s  | 192262 | 1,38  | up   |
| 6625463 | 7269448 | 1545874 | complement component 1, s subcomponent       | C1s  | 192262 | 2,06  | down |
| 5636418 | 7371642 | 1800632 | complement component 3                       | C3   | 24232  | 3,47  | up   |
| 5658858 | 7371642 | 1800596 | complement component 3                       | C3   | 24232  | 4,48  | down |
| 5662068 | 7371642 | 1800612 | complement component 3                       | C3   | 24232  | 1,22  | up   |
| 5696544 | 7371642 | 1800603 | complement component 3                       | C3   | 24232  | 2,87  | down |
| 5729810 | 7371642 | 1800611 | complement component 3                       | C3   | 24232  | 1,55  | up   |
| 5746009 | 7371642 | 1800625 | complement component 3                       | C3   | 24232  | 1,53  | down |
| 5796343 | 7371642 | 1800621 | complement component 3                       | C3   | 24232  | 1,14  | down |
| 5800464 | 7371642 | 1800638 | complement component 3                       | C3   | 24232  | 1,76  | down |
| 5830932 | 7371642 | 1800602 | complement component 3                       | C3   | 24232  | 1,79  | down |
| 5880442 | 7371642 | 1800610 | complement component 3                       | C3   | 24232  | 1,00  | down |
| 5880554 | 7371642 | 1800614 | complement component 3                       | C3   | 24232  | 1,43  | up   |
| 5883192 | 7371642 | 1800613 | complement component 3                       | C3   | 24232  | 1,31  | up   |
| 5919926 | 7371642 | 1800597 | complement component 3                       | C3   | 24232  | 2,57  | down |
| 5948670 | 7371642 | 1800623 | complement component 3                       | C3   | 24232  | 1,36  | up   |
| 5956845 | 7371642 | 1800601 | complement component 3                       | C3   | 24232  | 1,62  | down |
| 5977363 | 7371642 | 1800599 | complement component 3                       | C3   | 24232  | 1,04  | up   |
| 6025551 | 7371642 | 1800636 | complement component 3                       | C3   | 24232  | 1,05  | up   |
| 6060260 | 7371642 | 1800615 | complement component 3                       | C3   | 24232  | 1,06  | down |
| 6073825 | 7371642 | 1800635 | complement component 3                       | C3   | 24232  | 1,75  | up   |
| 6122202 | 7371642 | 1800616 | complement component 3                       | C3   | 24232  | 1,73  | down |
| 6145714 | 7371642 | 1800604 | complement component 3                       | C3   | 24232  | 2,63  | down |
| 6151612 | 7371642 | 1800600 | complement component 3                       | C3   | 24232  | 1,64  | down |
| 6186298 | 7371642 | 1800616 | complement component 3                       | C3   | 24232  | 1,35  | up   |
| 6253972 | 7371642 | 1800629 | complement component 3                       | C3   | 24232  | 2,29  | up   |

|         |         |         |                                |      |        |      |      |
|---------|---------|---------|--------------------------------|------|--------|------|------|
| 6267262 | 7371642 | 1800635 | complement component 3         | C3   | 24232  | 1,52 | up   |
| 6274947 | 7371642 | 1800627 | complement component 3         | C3   | 24232  | 1,51 | up   |
| 6287600 | 7371642 | 1800619 | complement component 3         | C3   | 24232  | 1,78 | up   |
| 6358673 | 7371642 | 1800630 | complement component 3         | C3   | 24232  | 2,09 | up   |
| 6373041 | 7371642 | 1800638 | complement component 3         | C3   | 24232  | 2,88 | down |
| 6388324 | 7371642 | 1800618 | complement component 3         | C3   | 24232  | 1,34 | down |
| 6392367 | 7371642 | 1800622 | complement component 3         | C3   | 24232  | 1,04 | up   |
| 6437265 | 7371642 | 1800624 | complement component 3         | C3   | 24232  | 1,22 | up   |
| 6442401 | 7371642 | 1800621 | complement component 3         | C3   | 24232  | 3,53 | down |
| 6472422 | 7371642 | 1800605 | complement component 3         | C3   | 24232  | 2,24 | down |
| 6543043 | 7371642 | 1800610 | complement component 3         | C3   | 24232  | 1,10 | up   |
| 6573373 | 7371642 | 1800620 | complement component 3         | C3   | 24232  | 1,59 | down |
| 6579413 | 7371642 | 1800628 | complement component 3         | C3   | 24232  | 1,42 | up   |
| 6618475 | 7371642 | 1800606 | complement component 3         | C3   | 24232  | 2,22 | down |
| 6620119 | 7371642 | 1800626 | complement component 3         | C3   | 24232  | 1,73 | down |
| 6666543 | 7371642 | 1800633 | complement component 3         | C3   | 24232  | 1,31 | up   |
| 6670916 | 7371642 | 1800608 | complement component 3         | C3   | 24232  | 1,17 | down |
| 6699431 | 7371642 | 1800631 | complement component 3         | C3   | 24232  | 2,71 | up   |
| 6700008 | 7371642 | 1800607 | complement component 3         | C3   | 24232  | 1,82 | down |
| 6703436 | 7371642 | 1800617 | complement component 3         | C3   | 24232  | 1,23 | up   |
| 6723575 | 7371642 | 1800598 | complement component 3         | C3   | 24232  | 1,02 | down |
| 5646665 | 7216846 | 1414834 | complement component 4, gene 2 | C4-2 | 406161 | 1,55 | down |
| 5685910 | 7216846 | 1414831 | complement component 4, gene 2 | C4-2 | 406161 | 1,27 | up   |
| 5764124 | 7216846 | 1414836 | complement component 4, gene 2 | C4-2 | 406161 | 1,36 | up   |
| 5780503 | 7216846 | 1414844 | complement component 4, gene 2 | C4-2 | 406161 | 1,06 | up   |
| 5842307 | 7216846 | 1414825 | complement component 4, gene 2 | C4-2 | 406161 | 1,47 | down |
| 5852269 | 7216846 | 1414841 | complement component 4, gene 2 | C4-2 | 406161 | 1,26 | down |
| 5884262 | 7216846 | 1414826 | complement component 4, gene 2 | C4-2 | 406161 | 1,21 | down |
| 5985208 | 7216846 | 1414848 | complement component 4, gene 2 | C4-2 | 406161 | 1,15 | down |
| 6013601 | 7216846 | 1414833 | complement component 4, gene 2 | C4-2 | 406161 | 1,19 | up   |
| 6017279 | 7216846 | 1414855 | complement component 4, gene 2 | C4-2 | 406161 | 1,11 | down |
| 6019612 | 7216846 | 1414838 | complement component 4, gene 2 | C4-2 | 406161 | 1,08 | up   |
| 6055132 | 7216846 | 1414851 | complement component 4, gene 2 | C4-2 | 406161 | 1,67 | down |
| 6070322 | 7216846 | 1414830 | complement component 4, gene 2 | C4-2 | 406161 | 1,02 | down |
| 6088898 | 7216846 | 1414828 | complement component 4, gene 2 | C4-2 | 406161 | 1,09 | up   |
| 6125807 | 7216846 | 1414856 | complement component 4, gene 2 | C4-2 | 406161 | 1,56 | down |
| 6131142 | 7216846 | 1414852 | complement component 4, gene 2 | C4-2 | 406161 | 1,18 | up   |
| 6171194 | 7216846 | 1414839 | complement component 4, gene 2 | C4-2 | 406161 | 1,15 | up   |
| 6181092 | 7216846 | 1414836 | complement component 4, gene 2 | C4-2 | 406161 | 1,12 | down |
| 6211716 | 7216846 | 1414835 | complement component 4, gene 2 | C4-2 | 406161 | 1,27 | up   |
| 6259100 | 7216846 | 1414849 | complement component 4, gene 2 | C4-2 | 406161 | 1,16 | down |
| 6277520 | 7216846 | 1414845 | complement component 4, gene 2 | C4-2 | 406161 | 1,00 | up   |
| 6291738 | 7216846 | 1414847 | complement component 4, gene 2 | C4-2 | 406161 | 1,50 | up   |
| 6321117 | 7216846 | 1414857 | complement component 4, gene 2 | C4-2 | 406161 | 1,06 | down |
| 6377201 | 7216846 | 1414866 | complement component 4, gene 2 | C4-2 | 406161 | 1,06 | down |
| 6443388 | 7216846 | 1414854 | complement component 4, gene 2 | C4-2 | 406161 | 1,20 | up   |
| 6490291 | 7216846 | 1414843 | complement component 4, gene 2 | C4-2 | 406161 | 1,22 | up   |
| 6554026 | 7216846 | 1414835 | complement component 4, gene 2 | C4-2 | 406161 | 1,05 | down |
| 6557964 | 7216846 | 1414837 | complement component 4, gene 2 | C4-2 | 406161 | 1,06 | down |
| 6584661 | 7216846 | 1414850 | complement component 4, gene 2 | C4-2 | 406161 | 1,07 | up   |
| 6597308 | 7216846 | 1414854 | complement component 4, gene 2 | C4-2 | 406161 | 1,01 | down |
| 6598682 | 7216846 | 1414842 | complement component 4, gene 2 | C4-2 | 406161 | 1,01 | down |
| 6638389 | 7216846 | 1414827 | complement component 4, gene 2 | C4-2 | 406161 | 1,47 | down |
| 6677569 | 7216846 | 1414862 | complement component 4, gene 2 | C4-2 | 406161 | 1,23 | down |
| 6737081 | 7216846 | 1414829 | complement component 4, gene 2 | C4-2 | 406161 | 1,03 | up   |
| 6741065 | 7216846 | 1414840 | complement component 4, gene 2 | C4-2 | 406161 | 1,02 | up   |

|         |         |         |                                                                             |              |                  |      |      |
|---------|---------|---------|-----------------------------------------------------------------------------|--------------|------------------|------|------|
| 6742332 | 7216846 | 1414832 | complement component 4, gene 2                                              | C4-2         | 406161           | 1,17 | down |
| 6742395 | 7216846 | 1414846 | complement component 4, gene 2                                              | C4-2         | 406161           | 1,08 | up   |
| 5661776 | 7216846 | 1414822 | complement component 4B (Childo blood group)                                | C4b          | 24233            | 1,07 | up   |
| 5774193 | 7216846 | 1414815 | complement component 4B (Childo blood group)                                | C4b          | 24233            | 1,18 | up   |
| 5814917 | 7216846 | 1414811 | complement component 4B (Childo blood group)                                | C4b          | 24233            | 1,40 | up   |
| 5836738 | 7216846 | 1414803 | complement component 4B (Childo blood group)                                | C4b          | 24233            | 1,17 | up   |
| 5870052 | 7216846 | 1414824 | complement component 4B (Childo blood group)                                | C4b          | 24233            | 1,28 | up   |
| 5870590 | 7216846 | 1414823 | complement component 4B (Childo blood group)                                | C4b          | 24233            | 1,69 | down |
| 5879439 | 7216846 | 1414797 | complement component 4B (Childo blood group)                                | C4b          | 24233            | 1,25 | down |
| 6013399 | 7216846 | 1414795 | complement component 4B (Childo blood group)                                | C4b          | 24233            | 1,00 | up   |
| 6018639 | 7216846 | 1414812 | complement component 4B (Childo blood group)                                | C4b          | 24233            | 2,61 | up   |
| 6019361 | 7216846 | 1414807 | complement component 4B (Childo blood group)                                | C4b          | 24233            | 1,22 | down |
| 6020520 | 7216846 | 1414810 | complement component 4B (Childo blood group)                                | C4b          | 24233            | 1,05 | down |
| 6033530 | 7216846 | 1414817 | complement component 4B (Childo blood group)                                | C4b          | 24233            | 1,28 | down |
| 6039641 | 7216846 | 1414823 | complement component 4B (Childo blood group)                                | C4b          | 24233            | 1,38 | down |
| 6048048 | 7216846 | 1414804 | complement component 4B (Childo blood group)                                | C4b          | 24233            | 1,17 | down |
| 6067960 | 7216846 | 1414818 | complement component 4B (Childo blood group)                                | C4b          | 24233            | 1,13 | up   |
| 6085071 | 7216846 | 1414853 | complement component 4B (Childo blood group)                                | C4b          | 24233            | 1,32 | up   |
| 6093198 | 7216846 | 1414804 | complement component 4B (Childo blood group)                                | C4b          | 24233            | 1,16 | down |
| 6140649 | 7216846 | 1414819 | complement component 4B (Childo blood group)                                | C4b          | 24233            | 1,28 | down |
| 6220837 | 7216846 | 1414793 | complement component 4B (Childo blood group)                                | C4b          | 24233            | 1,44 | up   |
| 6252651 | 7216846 | 1414799 | complement component 4B (Childo blood group)                                | C4b          | 24233            | 1,43 | up   |
| 6272956 | 7216846 | 1414794 | complement component 4B (Childo blood group)                                | C4b          | 24233            | 1,52 | down |
| 6315178 | 7216846 | 1414798 | complement component 4B (Childo blood group)                                | C4b          | 24233            | 1,77 | down |
| 6318031 | 7216846 | 1414806 | complement component 4B (Childo blood group)                                | C4b          | 24233            | 1,00 | up   |
| 6338086 | 7216846 | 1414805 | complement component 4B (Childo blood group)                                | C4b          | 24233            | 1,07 | down |
| 6348486 | 7216846 | 1414816 | complement component 4B (Childo blood group)                                | C4b          | 24233            | 1,03 | up   |
| 6400370 | 7216846 | 1414813 | complement component 4B (Childo blood group)                                | C4b          | 24233            | 1,19 | up   |
| 6413806 | 7216846 | 1414821 | complement component 4B (Childo blood group)                                | C4b          | 24233            | 1,92 | down |
| 6461920 | 7216846 | 1414796 | complement component 4B (Childo blood group)                                | C4b          | 24233            | 1,53 | down |
| 6496230 | 7216846 | 1414800 | complement component 4B (Childo blood group)                                | C4b          | 24233            | 1,18 | up   |
| 6522778 | 7216846 | 1414808 | complement component 4B (Childo blood group)                                | C4b          | 24233            | 1,21 | down |
| 6547728 | 7216846 | 1414809 | complement component 4B (Childo blood group)                                | C4b          | 24233            | 1,20 | up   |
| 6574067 | 7216846 | 1414820 | complement component 4B (Childo blood group)                                | C4b          | 24233            | 1,07 | down |
| 6659516 | 7216846 | 1414803 | complement component 4B (Childo blood group)                                | C4b          | 24233            | 1,39 | down |
| 6715430 | 7216846 | 1414802 | complement component 4B (Childo blood group)                                | C4b          | 24233            | 1,13 | up   |
| 6717136 | 7216846 | 1414814 | complement component 4B (Childo blood group)                                | C4b          | 24233            | 1,06 | up   |
| 6733392 | 7216846 | 1414801 | complement component 4B (Childo blood group)                                | C4b          | 24233            | 1,14 | down |
| 5713537 | 7216846 | 1414859 | complement component 4B (Childo blood group) /// complement component 4, ge | C4b /// C4-2 | 24233 /// 406161 | 1,44 | up   |
| 6050818 | 7216846 | 1414863 | complement component 4B (Childo blood group) /// complement component 4, ge | C4b /// C4-2 | 24233 /// 406161 | 1,20 | up   |
| 6113488 | 7216846 | 1414867 | complement component 4B (Childo blood group) /// complement component 4, ge | C4b /// C4-2 | 24233 /// 406161 | 1,19 | down |
| 6222597 | 7216846 | 1414864 | complement component 4B (Childo blood group) /// complement component 4, ge | C4b /// C4-2 | 24233 /// 406161 | 1,17 | up   |
| 6405850 | 7216846 | 1414865 | complement component 4B (Childo blood group) /// complement component 4, ge | C4b /// C4-2 | 24233 /// 406161 | 1,11 | up   |
| 6420517 | 7216846 | 1414865 | complement component 4B (Childo blood group) /// complement component 4, ge | C4b /// C4-2 | 24233 /// 406161 | 1,27 | up   |
| 6512059 | 7216846 | 1414861 | complement component 4B (Childo blood group) /// complement component 4, ge | C4b /// C4-2 | 24233 /// 406161 | 1,48 | down |
| 6548600 | 7216846 | 1414860 | complement component 4B (Childo blood group) /// complement component 4, ge | C4b /// C4-2 | 24233 /// 406161 | 1,08 | down |
| 6599354 | 7216846 | 1414858 | complement component 4B (Childo blood group) /// complement component 4, ge | C4b /// C4-2 | 24233 /// 406161 | 1,23 | up   |
| 5791055 | 7190247 | 1350358 | complement component 6                                                      | C6           | 24237            | 1,14 | down |
| 5841437 | 7190247 | 1350357 | complement component 6                                                      | C6           | 24237            | 1,22 | down |
| 5902509 | 7190247 | 1350351 | complement component 6                                                      | C6           | 24237            | 1,21 | down |
| 5911154 | 7190247 | 1350364 | complement component 6                                                      | C6           | 24237            | 1,06 | down |
| 5948975 | 7190247 | 1350351 | complement component 6                                                      | C6           | 24237            | 1,07 | up   |
| 5958499 | 7190247 | 1350359 | complement component 6                                                      | C6           | 24237            | 1,70 | down |
| 5992500 | 7190247 | 1350363 | complement component 6                                                      | C6           | 24237            | 1,33 | down |
| 6000529 | 7190247 | 1350360 | complement component 6                                                      | C6           | 24237            | 1,15 | up   |
| 6061421 | 7190247 | 1350352 | complement component 6                                                      | C6           | 24237            | 1,28 | up   |

|         |         |         |                                         |      |        |      |      |
|---------|---------|---------|-----------------------------------------|------|--------|------|------|
| 6285968 | 7190247 | 1350356 | complement component 6                  | C6   | 24237  | 1,41 | up   |
| 6322297 | 7190247 | 1350364 | complement component 6                  | C6   | 24237  | 1,04 | down |
| 6430614 | 7190247 | 1350353 | complement component 6                  | C6   | 24237  | 1,15 | up   |
| 6441280 | 7190247 | 1350355 | complement component 6                  | C6   | 24237  | 1,23 | up   |
| 6490200 | 7190247 | 1350354 | complement component 6                  | C6   | 24237  | 1,19 | up   |
| 6543200 | 7190247 | 1350361 | complement component 6                  | C6   | 24237  | 2,48 | down |
| 6570696 | 7190247 | 1350348 | complement component 6                  | C6   | 24237  | 1,31 | up   |
| 6630455 | 7190247 | 1350362 | complement component 6                  | C6   | 24237  | 1,48 | down |
| 6707558 | 7190247 | 1350350 | complement component 6                  | C6   | 24237  | 1,86 | up   |
| 6743004 | 7190247 | 1350349 | complement component 6                  | C6   | 24237  | 1,13 | down |
| 5652522 | 7216827 | 1414729 | complement factor B                     | Cfb  | 294257 | 1,16 | down |
| 5691292 | 7216827 | 1414737 | complement factor B                     | Cfb  | 294257 | 1,99 | down |
| 5699059 | 7216827 | 1414725 | complement factor B                     | Cfb  | 294257 | 4,06 | up   |
| 5767205 | 7216827 | 1414724 | complement factor B                     | Cfb  | 294257 | 1,09 | up   |
| 5863118 | 7216827 | 1414728 | complement factor B                     | Cfb  | 294257 | 1,28 | up   |
| 5863568 | 7216827 | 1414726 | complement factor B                     | Cfb  | 294257 | 1,64 | up   |
| 5864041 | 7216827 | 1414738 | complement factor B                     | Cfb  | 294257 | 1,40 | down |
| 5890415 | 7216827 | 1414736 | complement factor B                     | Cfb  | 294257 | 1,21 | up   |
| 6017147 | 7216827 | 1414727 | complement factor B                     | Cfb  | 294257 | 1,44 | up   |
| 6109212 | 7216827 | 1414739 | complement factor B                     | Cfb  | 294257 | 1,37 | down |
| 6203562 | 7216827 | 1414730 | complement factor B                     | Cfb  | 294257 | 1,72 | up   |
| 6204347 | 7216827 | 1414735 | complement factor B                     | Cfb  | 294257 | 1,76 | up   |
| 6255092 | 7216827 | 1414734 | complement factor B                     | Cfb  | 294257 | 1,93 | up   |
| 6322803 | 7216827 | 1414742 | complement factor B                     | Cfb  | 294257 | 1,43 | down |
| 6500281 | 7216827 | 1414741 | complement factor B                     | Cfb  | 294257 | 1,42 | down |
| 6531000 | 7216827 | 1414733 | complement factor B                     | Cfb  | 294257 | 1,05 | down |
| 6617986 | 7216827 | 1414731 | complement factor B                     | Cfb  | 294257 | 1,41 | down |
| 6703420 | 7216827 | 1414732 | complement factor B                     | Cfb  | 294257 | 1,00 | up   |
| 6733349 | 7216827 | 1414740 | complement factor B                     | Cfb  | 294257 | 1,20 | down |
| 5679301 | 7111837 | 1156832 | complement factor H                     | Cfh  | 155012 | 1,21 | up   |
| 5694442 | 7111837 | 1156841 | complement factor H                     | Cfh  | 155012 | 2,11 | up   |
| 5720825 | 7111837 | 1156822 | complement factor H                     | Cfh  | 155012 | 1,07 | up   |
| 5787585 | 7111837 | 1156822 | complement factor H                     | Cfh  | 155012 | 1,79 | down |
| 5790211 | 7111837 | 1156838 | complement factor H                     | Cfh  | 155012 | 1,52 | down |
| 5825914 | 7111837 | 1156826 | complement factor H                     | Cfh  | 155012 | 1,00 | up   |
| 5832455 | 7111837 | 1156823 | complement factor H                     | Cfh  | 155012 | 1,11 | down |
| 5938652 | 7111837 | 1156829 | complement factor H                     | Cfh  | 155012 | 1,19 | up   |
| 6010821 | 7111837 | 1156831 | complement factor H                     | Cfh  | 155012 | 1,08 | down |
| 6011586 | 7111837 | 1156836 | complement factor H                     | Cfh  | 155012 | 1,17 | down |
| 6111157 | 7111837 | 1156825 | complement factor H                     | Cfh  | 155012 | 1,48 | down |
| 6134821 | 7111837 | 1156828 | complement factor H                     | Cfh  | 155012 | 1,10 | up   |
| 6139763 | 7111837 | 1156835 | complement factor H                     | Cfh  | 155012 | 1,84 | up   |
| 6142913 | 7111837 | 1156828 | complement factor H                     | Cfh  | 155012 | 1,00 | up   |
| 6256474 | 7111837 | 1156832 | complement factor H                     | Cfh  | 155012 | 1,44 | up   |
| 6262563 | 7111837 | 1156834 | complement factor H                     | Cfh  | 155012 | 1,02 | up   |
| 6322516 | 7111837 | 1156833 | complement factor H                     | Cfh  | 155012 | 1,11 | up   |
| 6412837 | 7111837 | 1156842 | complement factor H                     | Cfh  | 155012 | 1,38 | down |
| 6449067 | 7111837 | 1156830 | complement factor H                     | Cfh  | 155012 | 1,26 | up   |
| 6458420 | 7111837 | 1156837 | complement factor H                     | Cfh  | 155012 | 1,09 | down |
| 6458965 | 7111837 | 1156822 | complement factor H                     | Cfh  | 155012 | 1,61 | up   |
| 6494260 | 7111837 | 1156840 | complement factor H                     | Cfh  | 155012 | 1,15 | down |
| 6509996 | 7111837 | 1156839 | complement factor H                     | Cfh  | 155012 | 1,12 | up   |
| 6514839 | 7111837 | 1156827 | complement factor H                     | Cfh  | 155012 | 1,11 | down |
| 6562356 | 7111837 | 1156843 | complement factor H                     | Cfh  | 155012 | 1,57 | down |
| 6708680 | 7111837 | 1156824 | complement factor H                     | Cfh  | 155012 | 1,05 | up   |
| 5625822 | 7208606 | 1395663 | component of oligomeric golgi complex 6 | Cog6 | 310411 | 1,32 | down |

|         |         |         |                                                  |        |        |      |      |
|---------|---------|---------|--------------------------------------------------|--------|--------|------|------|
| 5695191 | 7208606 | 1395662 | component of oligomeric golgi complex 6          | Cog6   | 310411 | 1,35 | up   |
| 5752684 | 7208606 | 1395668 | component of oligomeric golgi complex 6          | Cog6   | 310411 | 1,01 | down |
| 5818290 | 7208606 | 1395668 | component of oligomeric golgi complex 6          | Cog6   | 310411 | 1,16 | up   |
| 5821356 | 7208606 | 1395669 | component of oligomeric golgi complex 6          | Cog6   | 310411 | 1,11 | down |
| 5845124 | 7208606 | 1395675 | component of oligomeric golgi complex 6          | Cog6   | 310411 | 1,14 | down |
| 5878458 | 7208606 | 1395666 | component of oligomeric golgi complex 6          | Cog6   | 310411 | 1,52 | down |
| 5951721 | 7208606 | 1395657 | component of oligomeric golgi complex 6          | Cog6   | 310411 | 1,10 | up   |
| 6009461 | 7208606 | 1395661 | component of oligomeric golgi complex 6          | Cog6   | 310411 | 1,51 | down |
| 6039078 | 7208606 | 1395660 | component of oligomeric golgi complex 6          | Cog6   | 310411 | 1,08 | down |
| 6049393 | 7208606 | 1395664 | component of oligomeric golgi complex 6          | Cog6   | 310411 | 1,02 | up   |
| 6199742 | 7208606 | 1395662 | component of oligomeric golgi complex 6          | Cog6   | 310411 | 1,08 | down |
| 6243368 | 7208606 | 1395665 | component of oligomeric golgi complex 6          | Cog6   | 310411 | 1,06 | down |
| 6261889 | 7208606 | 1395673 | component of oligomeric golgi complex 6          | Cog6   | 310411 | 1,02 | down |
| 6322325 | 7208606 | 1395674 | component of oligomeric golgi complex 6          | Cog6   | 310411 | 1,32 | up   |
| 6328162 | 7208606 | 1395667 | component of oligomeric golgi complex 6          | Cog6   | 310411 | 1,05 | down |
| 6486844 | 7208606 | 1395671 | component of oligomeric golgi complex 6          | Cog6   | 310411 | 1,23 | up   |
| 6555663 | 7208606 | 1395658 | component of oligomeric golgi complex 6          | Cog6   | 310411 | 1,04 | down |
| 6565991 | 7208606 | 1395659 | component of oligomeric golgi complex 6          | Cog6   | 310411 | 1,72 | down |
| 6586072 | 7208606 | 1395676 | component of oligomeric golgi complex 6          | Cog6   | 310411 | 1,12 | up   |
| 6674486 | 7208606 | 1395670 | component of oligomeric golgi complex 6          | Cog6   | 310411 | 1,04 | up   |
| 6742409 | 7208606 | 1395672 | component of oligomeric golgi complex 6          | Cog6   | 310411 | 2,12 | down |
| 5660222 | 7291853 | 1600984 | connector enhancer of kinase suppressor of Ras 1 | Cnksr1 | 298545 | 1,50 | up   |
| 5677930 | 7291853 | 1600980 | connector enhancer of kinase suppressor of Ras 1 | Cnksr1 | 298545 | 1,06 | up   |
| 5688834 | 7291853 | 1600983 | connector enhancer of kinase suppressor of Ras 1 | Cnksr1 | 298545 | 1,34 | up   |
| 5754231 | 7291853 | 1600972 | connector enhancer of kinase suppressor of Ras 1 | Cnksr1 | 298545 | 1,37 | up   |
| 5828963 | 7291853 | 1600988 | connector enhancer of kinase suppressor of Ras 1 | Cnksr1 | 298545 | 1,46 | down |
| 5872274 | 7291853 | 1600970 | connector enhancer of kinase suppressor of Ras 1 | Cnksr1 | 298545 | 1,35 | down |
| 5908146 | 7291853 | 1600981 | connector enhancer of kinase suppressor of Ras 1 | Cnksr1 | 298545 | 1,05 | up   |
| 5947431 | 7291853 | 1600987 | connector enhancer of kinase suppressor of Ras 1 | Cnksr1 | 298545 | 1,27 | up   |
| 6096448 | 7291853 | 1600969 | connector enhancer of kinase suppressor of Ras 1 | Cnksr1 | 298545 | 1,19 | down |
| 6228396 | 7291853 | 1600974 | connector enhancer of kinase suppressor of Ras 1 | Cnksr1 | 298545 | 1,45 | up   |
| 6238097 | 7291853 | 1600982 | connector enhancer of kinase suppressor of Ras 1 | Cnksr1 | 298545 | 1,02 | up   |
| 6251706 | 7291853 | 1600980 | connector enhancer of kinase suppressor of Ras 1 | Cnksr1 | 298545 | 1,63 | down |
| 6255225 | 7291853 | 1600968 | connector enhancer of kinase suppressor of Ras 1 | Cnksr1 | 298545 | 1,35 | down |
| 6256244 | 7291853 | 1600976 | connector enhancer of kinase suppressor of Ras 1 | Cnksr1 | 298545 | 2,20 | down |
| 6306655 | 7291853 | 1600989 | connector enhancer of kinase suppressor of Ras 1 | Cnksr1 | 298545 | 1,32 | down |
| 6345658 | 7291853 | 1600972 | connector enhancer of kinase suppressor of Ras 1 | Cnksr1 | 298545 | 1,26 | up   |
| 6350990 | 7291853 | 1600979 | connector enhancer of kinase suppressor of Ras 1 | Cnksr1 | 298545 | 1,05 | down |
| 6373327 | 7291853 | 1600975 | connector enhancer of kinase suppressor of Ras 1 | Cnksr1 | 298545 | 1,29 | up   |
| 6417083 | 7291853 | 1600976 | connector enhancer of kinase suppressor of Ras 1 | Cnksr1 | 298545 | 1,59 | up   |
| 6423065 | 7291853 | 1600986 | connector enhancer of kinase suppressor of Ras 1 | Cnksr1 | 298545 | 1,31 | up   |
| 6525366 | 7291853 | 1600973 | connector enhancer of kinase suppressor of Ras 1 | Cnksr1 | 298545 | 1,13 | down |
| 6531699 | 7291853 | 1600982 | connector enhancer of kinase suppressor of Ras 1 | Cnksr1 | 298545 | 1,11 | up   |
| 6539887 | 7291853 | 1600985 | connector enhancer of kinase suppressor of Ras 1 | Cnksr1 | 298545 | 1,11 | down |
| 6550348 | 7291853 | 1600978 | connector enhancer of kinase suppressor of Ras 1 | Cnksr1 | 298545 | 1,36 | up   |
| 6612787 | 7291853 | 1600971 | connector enhancer of kinase suppressor of Ras 1 | Cnksr1 | 298545 | 1,30 | up   |
| 6632679 | 7291853 | 1600988 | connector enhancer of kinase suppressor of Ras 1 | Cnksr1 | 298545 | 1,09 | up   |
| 5663930 | 7374954 | 1809274 | connector enhancer of kinase suppressor of Ras 2 | Cnksr2 | 59322  | 1,67 | up   |
| 5674325 | 7374954 | 1809270 | connector enhancer of kinase suppressor of Ras 2 | Cnksr2 | 59322  | 1,09 | down |
| 5716588 | 7374954 | 1809255 | connector enhancer of kinase suppressor of Ras 2 | Cnksr2 | 59322  | 1,03 | up   |
| 5768179 | 7374954 | 1809255 | connector enhancer of kinase suppressor of Ras 2 | Cnksr2 | 59322  | 1,03 | up   |
| 5795514 | 7374954 | 1809267 | connector enhancer of kinase suppressor of Ras 2 | Cnksr2 | 59322  | 1,05 | down |
| 5868911 | 7374954 | 1809261 | connector enhancer of kinase suppressor of Ras 2 | Cnksr2 | 59322  | 1,00 | down |
| 5925509 | 7374954 | 1809269 | connector enhancer of kinase suppressor of Ras 2 | Cnksr2 | 59322  | 1,27 | up   |
| 5950414 | 7374954 | 1809256 | connector enhancer of kinase suppressor of Ras 2 | Cnksr2 | 59322  | 1,20 | down |
| 5999166 | 7374954 | 1809277 | connector enhancer of kinase suppressor of Ras 2 | Cnksr2 | 59322  | 1,41 | down |



|         |         |         |                                                                    |         |        |      |      |
|---------|---------|---------|--------------------------------------------------------------------|---------|--------|------|------|
| 6024800 | 7374954 | 1809263 | connector enhancer of kinase suppressor of Ras 2                   | Cnksr2  | 59322  | 1,27 | up   |
| 6081419 | 7374954 | 1809275 | connector enhancer of kinase suppressor of Ras 2                   | Cnksr2  | 59322  | 1,09 | up   |
| 6095373 | 7374954 | 1809258 | connector enhancer of kinase suppressor of Ras 2                   | Cnksr2  | 59322  | 1,08 | up   |
| 6195527 | 7374954 | 1809276 | connector enhancer of kinase suppressor of Ras 2                   | Cnksr2  | 59322  | 1,06 | up   |
| 6242843 | 7374954 | 1809271 | connector enhancer of kinase suppressor of Ras 2                   | Cnksr2  | 59322  | 1,14 | up   |
| 6333084 | 7374954 | 1809259 | connector enhancer of kinase suppressor of Ras 2                   | Cnksr2  | 59322  | 1,10 | up   |
| 6373803 | 7374954 | 1809264 | connector enhancer of kinase suppressor of Ras 2                   | Cnksr2  | 59322  | 2,11 | down |
| 6390515 | 7374954 | 1809260 | connector enhancer of kinase suppressor of Ras 2                   | Cnksr2  | 59322  | 1,27 | down |
| 6392583 | 7374954 | 1809255 | connector enhancer of kinase suppressor of Ras 2                   | Cnksr2  | 59322  | 1,30 | down |
| 6439988 | 7374954 | 1809257 | connector enhancer of kinase suppressor of Ras 2                   | Cnksr2  | 59322  | 1,15 | down |
| 6468355 | 7374954 | 1809262 | connector enhancer of kinase suppressor of Ras 2                   | Cnksr2  | 59322  | 1,06 | up   |
| 6487675 | 7374954 | 1809274 | connector enhancer of kinase suppressor of Ras 2                   | Cnksr2  | 59322  | 1,58 | down |
| 6514777 | 7374954 | 1809268 | connector enhancer of kinase suppressor of Ras 2                   | Cnksr2  | 59322  | 1,16 | down |
| 6540582 | 7374954 | 1809266 | connector enhancer of kinase suppressor of Ras 2                   | Cnksr2  | 59322  | 1,00 | up   |
| 6545090 | 7374954 | 1809265 | connector enhancer of kinase suppressor of Ras 2                   | Cnksr2  | 59322  | 1,02 | up   |
| 6613127 | 7374954 | 1809272 | connector enhancer of kinase suppressor of Ras 2                   | Cnksr2  | 59322  | 1,17 | up   |
| 6622052 | 7374954 | 1809273 | connector enhancer of kinase suppressor of Ras 2                   | Cnksr2  | 59322  | 1,30 | down |
| 6666458 | 7374954 | 1809255 | connector enhancer of kinase suppressor of Ras 2                   | Cnksr2  | 59322  | 1,10 | up   |
| 6723794 | 7374954 | 1809275 | connector enhancer of kinase suppressor of Ras 2                   | Cnksr2  | 59322  | 1,41 | up   |
| 5629706 | 7181169 | 1328123 | contactin associated protein-like 4                                | Cntnap4 | 307865 | 1,15 | down |
| 5723172 | 7181169 | 1328109 | contactin associated protein-like 4                                | Cntnap4 | 307865 | 1,72 | up   |
| 5728860 | 7181169 | 1328160 | contactin associated protein-like 4                                | Cntnap4 | 307865 | 1,83 | down |
| 5768509 | 7181169 | 1328128 | contactin associated protein-like 4                                | Cntnap4 | 307865 | 1,12 | up   |
| 5815719 | 7181169 | 1328130 | contactin associated protein-like 4                                | Cntnap4 | 307865 | 1,04 | up   |
| 5831325 | 7181169 | 1328145 | contactin associated protein-like 4                                | Cntnap4 | 307865 | 1,38 | down |
| 5837255 | 7181169 | 1328160 | contactin associated protein-like 4                                | Cntnap4 | 307865 | 1,21 | up   |
| 5860068 | 7181169 | 1328152 | contactin associated protein-like 4                                | Cntnap4 | 307865 | 1,20 | up   |
| 6064086 | 7181169 | 1328131 | contactin associated protein-like 4                                | Cntnap4 | 307865 | 1,10 | up   |
| 6137767 | 7181169 | 1328160 | contactin associated protein-like 4                                | Cntnap4 | 307865 | 1,08 | up   |
| 6203967 | 7181169 | 1328160 | contactin associated protein-like 4                                | Cntnap4 | 307865 | 1,36 | down |
| 6219205 | 7181169 | 1328146 | contactin associated protein-like 4                                | Cntnap4 | 307865 | 1,03 | up   |
| 6242869 | 7181169 | 1328144 | contactin associated protein-like 4                                | Cntnap4 | 307865 | 1,20 | up   |
| 6278061 | 7181169 | 1328135 | contactin associated protein-like 4                                | Cntnap4 | 307865 | 2,26 | down |
| 6280618 | 7181169 | 1328160 | contactin associated protein-like 4                                | Cntnap4 | 307865 | 1,12 | down |
| 6283530 | 7181169 | 1328136 | contactin associated protein-like 4                                | Cntnap4 | 307865 | 1,25 | down |
| 6331423 | 7181169 | 1328139 | contactin associated protein-like 4                                | Cntnap4 | 307865 | 1,05 | up   |
| 6423952 | 7181169 | 1328155 | contactin associated protein-like 4                                | Cntnap4 | 307865 | 1,37 | down |
| 6446547 | 7181169 | 1328109 | contactin associated protein-like 4                                | Cntnap4 | 307865 | 1,19 | up   |
| 6483796 | 7181169 | 1328160 | contactin associated protein-like 4                                | Cntnap4 | 307865 | 1,40 | up   |
| 6494872 | 7181169 | 1328160 | contactin associated protein-like 4                                | Cntnap4 | 307865 | 1,35 | up   |
| 6531626 | 7181169 | 1328104 | contactin associated protein-like 4                                | Cntnap4 | 307865 | 1,01 | down |
| 6544606 | 7181169 | 1328147 | contactin associated protein-like 4                                | Cntnap4 | 307865 | 1,03 | down |
| 6557300 | 7181169 | 1328154 | contactin associated protein-like 4                                | Cntnap4 | 307865 | 1,22 | up   |
| 6557470 | 7181169 | 1328151 | contactin associated protein-like 4                                | Cntnap4 | 307865 | 1,67 | up   |
| 6565042 | 7181169 | 1328092 | contactin associated protein-like 4                                | Cntnap4 | 307865 | 1,05 | up   |
| 6596713 | 7181169 | 1328135 | contactin associated protein-like 4                                | Cntnap4 | 307865 | 1,12 | up   |
| 6655280 | 7181169 | 1328159 | contactin associated protein-like 4                                | Cntnap4 | 307865 | 1,06 | down |
| 6673440 | 7181169 | 1328158 | contactin associated protein-like 4                                | Cntnap4 | 307865 | 1,17 | down |
| 6696761 | 7181169 | 1328139 | contactin associated protein-like 4                                | Cntnap4 | 307865 | 1,24 | down |
| 6701351 | 7181169 | 1328140 | contactin associated protein-like 4                                | Cntnap4 | 307865 | 1,69 | down |
| 6728483 | 7181169 | 1328142 | contactin associated protein-like 4                                | Cntnap4 | 307865 | 1,18 | down |
| 5639986 | 7244305 | 1484200 | COP9 constitutive photomorphogenic homolog subunit 2 (Arabidopsis) | Cops2   | 261736 | 1,11 | down |
| 5734026 | 7244305 | 1484191 | COP9 constitutive photomorphogenic homolog subunit 2 (Arabidopsis) | Cops2   | 261736 | 1,20 | up   |
| 5792227 | 7244305 | 1484194 | COP9 constitutive photomorphogenic homolog subunit 2 (Arabidopsis) | Cops2   | 261736 | 1,15 | up   |
| 5810307 | 7244305 | 1484195 | COP9 constitutive photomorphogenic homolog subunit 2 (Arabidopsis) | Cops2   | 261736 | 1,04 | down |
| 5864918 | 7244305 | 1484197 | COP9 constitutive photomorphogenic homolog subunit 2 (Arabidopsis) | Cops2   | 261736 | 1,17 | up   |

|         |         |         |                                                                     |        |        |      |      |
|---------|---------|---------|---------------------------------------------------------------------|--------|--------|------|------|
| 5895362 | 7244305 | 1484204 | COP9 constitutive photomorphogenic homolog subunit 2 (Arabidopsis)  | Cops2  | 261736 | 1,49 | up   |
| 5931559 | 7244305 | 1484203 | COP9 constitutive photomorphogenic homolog subunit 2 (Arabidopsis)  | Cops2  | 261736 | 1,32 | up   |
| 5964083 | 7244305 | 1484192 | COP9 constitutive photomorphogenic homolog subunit 2 (Arabidopsis)  | Cops2  | 261736 | 1,26 | up   |
| 6023621 | 7244305 | 1484191 | COP9 constitutive photomorphogenic homolog subunit 2 (Arabidopsis)  | Cops2  | 261736 | 1,27 | up   |
| 6120453 | 7244305 | 1484202 | COP9 constitutive photomorphogenic homolog subunit 2 (Arabidopsis)  | Cops2  | 261736 | 1,13 | down |
| 6176090 | 7244305 | 1484204 | COP9 constitutive photomorphogenic homolog subunit 2 (Arabidopsis)  | Cops2  | 261736 | 1,05 | down |
| 6270337 | 7244305 | 1484199 | COP9 constitutive photomorphogenic homolog subunit 2 (Arabidopsis)  | Cops2  | 261736 | 2,33 | down |
| 6443645 | 7244305 | 1484191 | COP9 constitutive photomorphogenic homolog subunit 2 (Arabidopsis)  | Cops2  | 261736 | 1,06 | up   |
| 6462266 | 7244305 | 1484201 | COP9 constitutive photomorphogenic homolog subunit 2 (Arabidopsis)  | Cops2  | 261736 | 1,42 | down |
| 6513582 | 7244305 | 1484198 | COP9 constitutive photomorphogenic homolog subunit 2 (Arabidopsis)  | Cops2  | 261736 | 1,23 | down |
| 6609263 | 7244305 | 1484198 | COP9 constitutive photomorphogenic homolog subunit 2 (Arabidopsis)  | Cops2  | 261736 | 1,12 | up   |
| 6647175 | 7244305 | 1484196 | COP9 constitutive photomorphogenic homolog subunit 2 (Arabidopsis)  | Cops2  | 261736 | 1,14 | down |
| 6689798 | 7244305 | 1484193 | COP9 constitutive photomorphogenic homolog subunit 2 (Arabidopsis)  | Cops2  | 261736 | 1,23 | up   |
| 5690459 | 7357103 | 1762388 | COP9 constitutive photomorphogenic homolog subunit 7B (Arabidopsis) | Cops7b | 363273 | 1,00 | down |
| 5830749 | 7357103 | 1762384 | COP9 constitutive photomorphogenic homolog subunit 7B (Arabidopsis) | Cops7b | 363273 | 1,26 | up   |
| 5944346 | 7357103 | 1762389 | COP9 constitutive photomorphogenic homolog subunit 7B (Arabidopsis) | Cops7b | 363273 | 1,03 | down |
| 6067645 | 7357103 | 1762385 | COP9 constitutive photomorphogenic homolog subunit 7B (Arabidopsis) | Cops7b | 363273 | 1,15 | down |
| 6325599 | 7357103 | 1762390 | COP9 constitutive photomorphogenic homolog subunit 7B (Arabidopsis) | Cops7b | 363273 | 1,02 | down |
| 6338538 | 7357103 | 1762389 | COP9 constitutive photomorphogenic homolog subunit 7B (Arabidopsis) | Cops7b | 363273 | 1,21 | down |
| 6404726 | 7357103 | 1762394 | COP9 constitutive photomorphogenic homolog subunit 7B (Arabidopsis) | Cops7b | 363273 | 1,02 | up   |
| 6495145 | 7357103 | 1762382 | COP9 constitutive photomorphogenic homolog subunit 7B (Arabidopsis) | Cops7b | 363273 | 1,06 | up   |
| 6528361 | 7357103 | 1762393 | COP9 constitutive photomorphogenic homolog subunit 7B (Arabidopsis) | Cops7b | 363273 | 1,11 | down |
| 5644923 | 7357566 | 1763487 | COP9 constitutive photomorphogenic homolog subunit 8 (Arabidopsis)  | Cops8  | 363283 | 1,16 | down |
| 5721887 | 7357566 | 1763484 | COP9 constitutive photomorphogenic homolog subunit 8 (Arabidopsis)  | Cops8  | 363283 | 1,19 | up   |
| 5725071 | 7357566 | 1763483 | COP9 constitutive photomorphogenic homolog subunit 8 (Arabidopsis)  | Cops8  | 363283 | 1,21 | up   |
| 6079213 | 7357566 | 1763486 | COP9 constitutive photomorphogenic homolog subunit 8 (Arabidopsis)  | Cops8  | 363283 | 1,01 | up   |
| 6212946 | 7357566 | 1763488 | COP9 constitutive photomorphogenic homolog subunit 8 (Arabidopsis)  | Cops8  | 363283 | 1,84 | down |
| 6299852 | 7357566 | 1763489 | COP9 constitutive photomorphogenic homolog subunit 8 (Arabidopsis)  | Cops8  | 363283 | 1,00 | down |
| 6476699 | 7357566 | 1763482 | COP9 constitutive photomorphogenic homolog subunit 8 (Arabidopsis)  | Cops8  | 363283 | 1,47 | up   |
| 6722881 | 7357566 | 1763490 | COP9 constitutive photomorphogenic homolog subunit 8 (Arabidopsis)  | Cops8  | 363283 | 1,09 | up   |
| 5657105 | 7221247 | 1425828 | copine V                                                            | Cpne5  | 309650 | 1,03 | down |
| 5665260 | 7221247 | 1425822 | copine V                                                            | Cpne5  | 309650 | 1,09 | up   |
| 5666095 | 7221247 | 1425826 | copine V                                                            | Cpne5  | 309650 | 1,06 | up   |
| 5694507 | 7221247 | 1425834 | copine V                                                            | Cpne5  | 309650 | 1,19 | down |
| 5694792 | 7221247 | 1425832 | copine V                                                            | Cpne5  | 309650 | 1,17 | down |
| 5847396 | 7221247 | 1425824 | copine V                                                            | Cpne5  | 309650 | 2,41 | down |
| 5849632 | 7221247 | 1425855 | copine V                                                            | Cpne5  | 309650 | 1,02 | up   |
| 5872218 | 7221247 | 1425857 | copine V                                                            | Cpne5  | 309650 | 1,28 | up   |
| 5933717 | 7221247 | 1425829 | copine V                                                            | Cpne5  | 309650 | 1,23 | down |
| 5994404 | 7221247 | 1425843 | copine V                                                            | Cpne5  | 309650 | 1,03 | up   |
| 6016973 | 7221247 | 1425823 | copine V                                                            | Cpne5  | 309650 | 1,13 | up   |
| 6117061 | 7221247 | 1425846 | copine V                                                            | Cpne5  | 309650 | 1,25 | up   |
| 6164742 | 7221247 | 1425825 | copine V                                                            | Cpne5  | 309650 | 1,37 | up   |
| 6167722 | 7221247 | 1425849 | copine V                                                            | Cpne5  | 309650 | 1,04 | up   |
| 6249877 | 7221247 | 1425847 | copine V                                                            | Cpne5  | 309650 | 1,02 | down |
| 6284701 | 7221247 | 1425848 | copine V                                                            | Cpne5  | 309650 | 1,01 | down |
| 6387666 | 7221247 | 1425837 | copine V                                                            | Cpne5  | 309650 | 1,57 | up   |
| 6499257 | 7221247 | 1425857 | copine V                                                            | Cpne5  | 309650 | 1,19 | down |
| 6540743 | 7221247 | 1425839 | copine V                                                            | Cpne5  | 309650 | 1,40 | up   |
| 6579562 | 7221247 | 1425856 | copine V                                                            | Cpne5  | 309650 | 1,04 | down |
| 6601499 | 7221247 | 1425838 | copine V                                                            | Cpne5  | 309650 | 1,27 | down |
| 6616394 | 7221247 | 1425836 | copine V                                                            | Cpne5  | 309650 | 1,01 | up   |
| 6722972 | 7221247 | 1425827 | copine V                                                            | Cpne5  | 309650 | 1,04 | down |
| 6743255 | 7221247 | 1425830 | copine V                                                            | Cpne5  | 309650 | 1,02 | up   |
| 5783517 | 7092406 | 1108780 | coproporphyrinogen oxidase                                          | Cpox   | 304024 | 2,47 | up   |
| 5836618 | 7092406 | 1108786 | coproporphyrinogen oxidase                                          | Cpox   | 304024 | 1,26 | up   |

|         |         |         |                                                                               |         |        |      |      |
|---------|---------|---------|-------------------------------------------------------------------------------|---------|--------|------|------|
| 5914146 | 7092406 | 1108780 | coproporphyrinogen oxidase                                                    | Cpox    | 304024 | 1,13 | up   |
| 6022817 | 7092406 | 1108780 | coproporphyrinogen oxidase                                                    | Cpox    | 304024 | 1,30 | down |
| 6033506 | 7092406 | 1108787 | coproporphyrinogen oxidase                                                    | Cpox    | 304024 | 1,31 | up   |
| 6265748 | 7092406 | 1108784 | coproporphyrinogen oxidase                                                    | Cpox    | 304024 | 1,24 | down |
| 6360382 | 7092406 | 1108780 | coproporphyrinogen oxidase                                                    | Cpox    | 304024 | 1,02 | down |
| 6502964 | 7092406 | 1108781 | coproporphyrinogen oxidase                                                    | Cpox    | 304024 | 1,01 | down |
| 6600575 | 7092406 | 1108789 | coproporphyrinogen oxidase                                                    | Cpox    | 304024 | 1,42 | down |
| 6626043 | 7092406 | 1108788 | coproporphyrinogen oxidase                                                    | Cpox    | 304024 | 1,05 | down |
| 6708816 | 7092406 | 1108780 | coproporphyrinogen oxidase                                                    | Cpox    | 304024 | 1,24 | down |
| 5797576 | 7234195 | 1458968 | core-binding factor, runt domain, alpha subunit 2, translocated to, 2 (human) | Cbfa2t2 | 296293 | 1,30 | down |
| 6157854 | 7234195 | 1458981 | core-binding factor, runt domain, alpha subunit 2, translocated to, 2 (human) | Cbfa2t2 | 296293 | 1,15 | down |
| 6543535 | 7234195 | 1458968 | core-binding factor, runt domain, alpha subunit 2, translocated to, 2 (human) | Cbfa2t2 | 296293 | 1,13 | down |
| 5700184 | 7099030 | 1125328 | coronin, actin binding protein 1C                                             | Coro1c  | 501841 | 1,11 | down |
| 5718356 | 7099030 | 1125350 | coronin, actin binding protein 1C                                             | Coro1c  | 501841 | 1,22 | up   |
| 5759845 | 7099030 | 1125351 | coronin, actin binding protein 1C                                             | Coro1c  | 501841 | 1,36 | up   |
| 5851327 | 7099030 | 1125352 | coronin, actin binding protein 1C                                             | Coro1c  | 501841 | 1,56 | up   |
| 6124839 | 7099030 | 1125349 | coronin, actin binding protein 1C                                             | Coro1c  | 501841 | 1,35 | up   |
| 6226392 | 7099030 | 1125347 | coronin, actin binding protein 1C                                             | Coro1c  | 501841 | 1,25 | up   |
| 6261530 | 7099030 | 1125348 | coronin, actin binding protein 1C                                             | Coro1c  | 501841 | 1,19 | up   |
| 6353587 | 7099030 | 1125356 | coronin, actin binding protein 1C                                             | Coro1c  | 501841 | 1,16 | up   |
| 6391024 | 7099030 | 1125354 | coronin, actin binding protein 1C                                             | Coro1c  | 501841 | 1,01 | down |
| 6455606 | 7099030 | 1125334 | coronin, actin binding protein 1C                                             | Coro1c  | 501841 | 1,66 | up   |
| 6511935 | 7099030 | 1125356 | coronin, actin binding protein 1C                                             | Coro1c  | 501841 | 1,33 | down |
| 6630147 | 7099030 | 1125355 | coronin, actin binding protein 1C                                             | Coro1c  | 501841 | 1,09 | up   |
| 5619509 | 7285914 | 1586705 | coronin, actin binding protein 2A                                             | Coro2a  | 313235 | 1,28 | up   |
| 5690300 | 7285914 | 1586704 | coronin, actin binding protein 2A                                             | Coro2a  | 313235 | 1,17 | down |
| 5731467 | 7285914 | 1586703 | coronin, actin binding protein 2A                                             | Coro2a  | 313235 | 1,41 | up   |
| 5935402 | 7285914 | 1586707 | coronin, actin binding protein 2A                                             | Coro2a  | 313235 | 1,04 | up   |
| 6086227 | 7285914 | 1586702 | coronin, actin binding protein 2A                                             | Coro2a  | 313235 | 1,05 | down |
| 6240812 | 7285914 | 1586709 | coronin, actin binding protein 2A                                             | Coro2a  | 313235 | 2,31 | down |
| 6382835 | 7285914 | 1586708 | coronin, actin binding protein 2A                                             | Coro2a  | 313235 | 1,22 | down |
| 6404530 | 7285914 | 1586712 | coronin, actin binding protein 2A                                             | Coro2a  | 313235 | 1,21 | down |
| 6433628 | 7285914 | 1586711 | coronin, actin binding protein 2A                                             | Coro2a  | 313235 | 1,21 | down |
| 6549339 | 7285914 | 1586710 | coronin, actin binding protein 2A                                             | Coro2a  | 313235 | 1,32 | up   |
| 6635686 | 7285914 | 1586706 | coronin, actin binding protein 2A                                             | Coro2a  | 313235 | 1,43 | down |
| 6698642 | 7285914 | 1586713 | coronin, actin binding protein 2A                                             | Coro2a  | 313235 | 1,34 | up   |
| 5774226 | 7072608 | 1062297 | corticotropin releasing hormone receptor 1                                    | Crhr1   | 58959  | 1,37 | up   |
| 5774943 | 7072608 | 1062301 | corticotropin releasing hormone receptor 1                                    | Crhr1   | 58959  | 1,09 | up   |
| 5792423 | 7072608 | 1062306 | corticotropin releasing hormone receptor 1                                    | Crhr1   | 58959  | 1,95 | down |
| 5836942 | 7072608 | 1062298 | corticotropin releasing hormone receptor 1                                    | Crhr1   | 58959  | 1,15 | down |
| 5915164 | 7072608 | 1062307 | corticotropin releasing hormone receptor 1                                    | Crhr1   | 58959  | 1,11 | down |
| 5982311 | 7072608 | 1062304 | corticotropin releasing hormone receptor 1                                    | Crhr1   | 58959  | 1,00 | up   |
| 6042126 | 7072608 | 1062299 | corticotropin releasing hormone receptor 1                                    | Crhr1   | 58959  | 1,58 | up   |
| 6054437 | 7072608 | 1062303 | corticotropin releasing hormone receptor 1                                    | Crhr1   | 58959  | 1,27 | up   |
| 6096386 | 7072608 | 1062300 | corticotropin releasing hormone receptor 1                                    | Crhr1   | 58959  | 1,82 | down |
| 6221617 | 7072608 | 1062309 | corticotropin releasing hormone receptor 1                                    | Crhr1   | 58959  | 1,08 | down |
| 6349628 | 7072608 | 1062297 | corticotropin releasing hormone receptor 1                                    | Crhr1   | 58959  | 1,45 | down |
| 6361070 | 7072608 | 1062305 | corticotropin releasing hormone receptor 1                                    | Crhr1   | 58959  | 1,42 | down |
| 6620080 | 7072608 | 1062302 | corticotropin releasing hormone receptor 1                                    | Crhr1   | 58959  | 1,11 | up   |
| 6649024 | 7072608 | 1062298 | corticotropin releasing hormone receptor 1                                    | Crhr1   | 58959  | 1,53 | down |
| 6699101 | 7072608 | 1062308 | corticotropin releasing hormone receptor 1                                    | Crhr1   | 58959  | 1,04 | up   |
| 5708086 | 7186220 | 1340760 | COX4 neighbor                                                                 | Cox4nb  | 361425 | 1,67 | down |
| 5802729 | 7186220 | 1340758 | COX4 neighbor                                                                 | Cox4nb  | 361425 | 2,20 | up   |
| 6059417 | 7186220 | 1340757 | COX4 neighbor                                                                 | Cox4nb  | 361425 | 1,26 | up   |
| 6618905 | 7186220 | 1340759 | COX4 neighbor                                                                 | Cox4nb  | 361425 | 1,54 | up   |
| 6651671 | 7186220 | 1340756 | COX4 neighbor                                                                 | Cox4nb  | 361425 | 1,00 | down |

|         |         |         |                                                           |         |        |      |      |
|---------|---------|---------|-----------------------------------------------------------|---------|--------|------|------|
| 6713781 | 7186220 | 1340755 | COX4 neighbor                                             | Cox4nb  | 361425 | 1,41 | down |
| 5641149 | 7201680 | 1379713 | coxsackie virus and adenovirus receptor-like 1            | Cxadr1l | 361873 | 2,08 | down |
| 5657470 | 7349291 | 1742991 | coxsackie virus and adenovirus receptor-like 1            | Cxadr1l | 361873 | 2,38 | up   |
| 5663334 | 7349291 | 1742993 | coxsackie virus and adenovirus receptor-like 1            | Cxadr1l | 361873 | 1,45 | down |
| 5732539 | 7201680 | 1379707 | coxsackie virus and adenovirus receptor-like 1            | Cxadr1l | 361873 | 1,22 | up   |
| 5840307 | 7349291 | 1742987 | coxsackie virus and adenovirus receptor-like 1            | Cxadr1l | 361873 | 1,05 | down |
| 5883765 | 7201680 | 1379712 | coxsackie virus and adenovirus receptor-like 1            | Cxadr1l | 361873 | 1,57 | up   |
| 5883974 | 7349291 | 1742989 | coxsackie virus and adenovirus receptor-like 1            | Cxadr1l | 361873 | 1,94 | up   |
| 5887007 | 7349291 | 1742985 | coxsackie virus and adenovirus receptor-like 1            | Cxadr1l | 361873 | 1,61 | down |
| 6027786 | 7349291 | 1742988 | coxsackie virus and adenovirus receptor-like 1            | Cxadr1l | 361873 | 1,02 | up   |
| 6030739 | 7349291 | 1742993 | coxsackie virus and adenovirus receptor-like 1            | Cxadr1l | 361873 | 1,13 | down |
| 6032661 | 7349291 | 1742986 | coxsackie virus and adenovirus receptor-like 1            | Cxadr1l | 361873 | 1,09 | down |
| 6079264 | 7201680 | 1379708 | coxsackie virus and adenovirus receptor-like 1            | Cxadr1l | 361873 | 1,50 | up   |
| 6167900 | 7201680 | 1379711 | coxsackie virus and adenovirus receptor-like 1            | Cxadr1l | 361873 | 2,32 | down |
| 6191974 | 7349291 | 1742989 | coxsackie virus and adenovirus receptor-like 1            | Cxadr1l | 361873 | 1,08 | up   |
| 6196586 | 7201680 | 1379710 | coxsackie virus and adenovirus receptor-like 1            | Cxadr1l | 361873 | 1,45 | up   |
| 6257228 | 7201680 | 1379710 | coxsackie virus and adenovirus receptor-like 1            | Cxadr1l | 361873 | 1,17 | up   |
| 6275393 | 7201680 | 1379713 | coxsackie virus and adenovirus receptor-like 1            | Cxadr1l | 361873 | 1,65 | down |
| 6343712 | 7349291 | 1742992 | coxsackie virus and adenovirus receptor-like 1            | Cxadr1l | 361873 | 1,58 | down |
| 6379113 | 7201680 | 1379711 | coxsackie virus and adenovirus receptor-like 1            | Cxadr1l | 361873 | 1,86 | up   |
| 6435729 | 7201680 | 1379706 | coxsackie virus and adenovirus receptor-like 1            | Cxadr1l | 361873 | 1,09 | up   |
| 6441128 | 7349291 | 1742987 | coxsackie virus and adenovirus receptor-like 1            | Cxadr1l | 361873 | 1,46 | up   |
| 6453001 | 7349291 | 1742990 | coxsackie virus and adenovirus receptor-like 1            | Cxadr1l | 361873 | 1,47 | up   |
| 6455067 | 7349291 | 1742992 | coxsackie virus and adenovirus receptor-like 1            | Cxadr1l | 361873 | 1,03 | down |
| 6566328 | 7201680 | 1379712 | coxsackie virus and adenovirus receptor-like 1            | Cxadr1l | 361873 | 1,80 | down |
| 6666741 | 7201680 | 1379709 | coxsackie virus and adenovirus receptor-like 1            | Cxadr1l | 361873 | 1,21 | up   |
| 6686443 | 7201680 | 1379712 | coxsackie virus and adenovirus receptor-like 1            | Cxadr1l | 361873 | 1,25 | up   |
| 6718476 | 7201680 | 1379708 | coxsackie virus and adenovirus receptor-like 1            | Cxadr1l | 361873 | 1,63 | down |
| 5621815 | 7310704 | 1649083 | creatine kinase, brain                                    | Ckb     | 24264  | 1,00 | down |
| 5659771 | 7310704 | 1649077 | creatine kinase, brain                                    | Ckb     | 24264  | 1,31 | up   |
| 5751934 | 7310704 | 1649085 | creatine kinase, brain                                    | Ckb     | 24264  | 2,04 | up   |
| 5910869 | 7310704 | 1649081 | creatine kinase, brain                                    | Ckb     | 24264  | 1,82 | up   |
| 5987828 | 7310704 | 1649078 | creatine kinase, brain                                    | Ckb     | 24264  | 1,20 | down |
| 6088000 | 7310704 | 1649082 | creatine kinase, brain                                    | Ckb     | 24264  | 1,50 | up   |
| 6113931 | 7310704 | 1649084 | creatine kinase, brain                                    | Ckb     | 24264  | 1,12 | down |
| 6394200 | 7310704 | 1649079 | creatine kinase, brain                                    | Ckb     | 24264  | 1,10 | down |
| 6487385 | 7310704 | 1649078 | creatine kinase, brain                                    | Ckb     | 24264  | 1,34 | down |
| 6502513 | 7310704 | 1649080 | creatine kinase, brain                                    | Ckb     | 24264  | 1,01 | down |
| 6085029 | 7303515 | 1630947 | crooked neck pre-mRNA splicing factor-like 1 (Drosophila) | Crnk1l  | 116481 | 1,70 | up   |
| 6108128 | 7303515 | 1630947 | crooked neck pre-mRNA splicing factor-like 1 (Drosophila) | Crnk1l  | 116481 | 1,04 | down |
| 6719923 | 7303515 | 1630946 | crooked neck pre-mRNA splicing factor-like 1 (Drosophila) | Crnk1l  | 116481 | 2,28 | down |
| 5651222 | 7223099 | 1430251 | c-ros oncogene 1 , receptor tyrosine kinase               | Ros1    | 25346  | 1,41 | down |
| 5710332 | 7223099 | 1430270 | c-ros oncogene 1 , receptor tyrosine kinase               | Ros1    | 25346  | 1,47 | up   |
| 5716139 | 7223099 | 1430236 | c-ros oncogene 1 , receptor tyrosine kinase               | Ros1    | 25346  | 1,27 | up   |
| 5720500 | 7223099 | 1430265 | c-ros oncogene 1 , receptor tyrosine kinase               | Ros1    | 25346  | 2,01 | up   |
| 5758969 | 7223099 | 1430243 | c-ros oncogene 1 , receptor tyrosine kinase               | Ros1    | 25346  | 1,62 | up   |
| 5765954 | 7223099 | 1430250 | c-ros oncogene 1 , receptor tyrosine kinase               | Ros1    | 25346  | 1,08 | down |
| 5779078 | 7223099 | 1430260 | c-ros oncogene 1 , receptor tyrosine kinase               | Ros1    | 25346  | 1,03 | down |
| 5785978 | 7223099 | 1430233 | c-ros oncogene 1 , receptor tyrosine kinase               | Ros1    | 25346  | 1,28 | up   |
| 5795893 | 7223099 | 1430276 | c-ros oncogene 1 , receptor tyrosine kinase               | Ros1    | 25346  | 2,05 | up   |
| 5796502 | 7223099 | 1430239 | c-ros oncogene 1 , receptor tyrosine kinase               | Ros1    | 25346  | 1,17 | up   |
| 5832760 | 7223099 | 1430249 | c-ros oncogene 1 , receptor tyrosine kinase               | Ros1    | 25346  | 1,04 | up   |
| 5868551 | 7223099 | 1430234 | c-ros oncogene 1 , receptor tyrosine kinase               | Ros1    | 25346  | 1,31 | down |
| 5899855 | 7223099 | 1430262 | c-ros oncogene 1 , receptor tyrosine kinase               | Ros1    | 25346  | 1,06 | up   |
| 5909310 | 7223099 | 1430256 | c-ros oncogene 1 , receptor tyrosine kinase               | Ros1    | 25346  | 1,21 | down |
| 5963184 | 7223099 | 1430251 | c-ros oncogene 1 , receptor tyrosine kinase               | Ros1    | 25346  | 1,10 | up   |

|         |         |         |                                                                              |         |        |      |      |
|---------|---------|---------|------------------------------------------------------------------------------|---------|--------|------|------|
| 5986258 | 7223099 | 1430255 | c-ros oncogene 1 , receptor tyrosine kinase                                  | Ros1    | 25346  | 1,07 | up   |
| 6002676 | 7223099 | 1430265 | c-ros oncogene 1 , receptor tyrosine kinase                                  | Ros1    | 25346  | 1,20 | down |
| 6011728 | 7223099 | 1430271 | c-ros oncogene 1 , receptor tyrosine kinase                                  | Ros1    | 25346  | 1,43 | up   |
| 6014631 | 7223099 | 1430275 | c-ros oncogene 1 , receptor tyrosine kinase                                  | Ros1    | 25346  | 1,58 | up   |
| 6016597 | 7223099 | 1430252 | c-ros oncogene 1 , receptor tyrosine kinase                                  | Ros1    | 25346  | 1,20 | down |
| 6017153 | 7223099 | 1430254 | c-ros oncogene 1 , receptor tyrosine kinase                                  | Ros1    | 25346  | 1,37 | down |
| 6021603 | 7223099 | 1430235 | c-ros oncogene 1 , receptor tyrosine kinase                                  | Ros1    | 25346  | 1,18 | down |
| 6028324 | 7223099 | 1430247 | c-ros oncogene 1 , receptor tyrosine kinase                                  | Ros1    | 25346  | 1,16 | down |
| 6043500 | 7223099 | 1430269 | c-ros oncogene 1 , receptor tyrosine kinase                                  | Ros1    | 25346  | 1,21 | up   |
| 6061898 | 7223099 | 1430245 | c-ros oncogene 1 , receptor tyrosine kinase                                  | Ros1    | 25346  | 1,17 | down |
| 6075525 | 7223099 | 1430258 | c-ros oncogene 1 , receptor tyrosine kinase                                  | Ros1    | 25346  | 1,29 | down |
| 6090587 | 7223099 | 1430232 | c-ros oncogene 1 , receptor tyrosine kinase                                  | Ros1    | 25346  | 1,29 | up   |
| 6096575 | 7223099 | 1430266 | c-ros oncogene 1 , receptor tyrosine kinase                                  | Ros1    | 25346  | 1,28 | down |
| 6105935 | 7223099 | 1430242 | c-ros oncogene 1 , receptor tyrosine kinase                                  | Ros1    | 25346  | 1,42 | up   |
| 6111816 | 7223099 | 1430251 | c-ros oncogene 1 , receptor tyrosine kinase                                  | Ros1    | 25346  | 1,58 | up   |
| 6120217 | 7223099 | 1430237 | c-ros oncogene 1 , receptor tyrosine kinase                                  | Ros1    | 25346  | 1,10 | up   |
| 6132096 | 7223099 | 1430248 | c-ros oncogene 1 , receptor tyrosine kinase                                  | Ros1    | 25346  | 2,07 | up   |
| 6134363 | 7223099 | 1430261 | c-ros oncogene 1 , receptor tyrosine kinase                                  | Ros1    | 25346  | 1,07 | up   |
| 6134962 | 7223099 | 1430278 | c-ros oncogene 1 , receptor tyrosine kinase                                  | Ros1    | 25346  | 1,30 | up   |
| 6158010 | 7223099 | 1430244 | c-ros oncogene 1 , receptor tyrosine kinase                                  | Ros1    | 25346  | 1,03 | down |
| 6175372 | 7223099 | 1430255 | c-ros oncogene 1 , receptor tyrosine kinase                                  | Ros1    | 25346  | 1,49 | down |
| 6189538 | 7223099 | 1430238 | c-ros oncogene 1 , receptor tyrosine kinase                                  | Ros1    | 25346  | 1,16 | up   |
| 6199623 | 7223099 | 1430246 | c-ros oncogene 1 , receptor tyrosine kinase                                  | Ros1    | 25346  | 1,20 | down |
| 6272592 | 7223099 | 1430259 | c-ros oncogene 1 , receptor tyrosine kinase                                  | Ros1    | 25346  | 1,42 | down |
| 6286198 | 7223099 | 1430241 | c-ros oncogene 1 , receptor tyrosine kinase                                  | Ros1    | 25346  | 1,17 | up   |
| 6287082 | 7223099 | 1430278 | c-ros oncogene 1 , receptor tyrosine kinase                                  | Ros1    | 25346  | 1,34 | up   |
| 6335329 | 7223099 | 1430257 | c-ros oncogene 1 , receptor tyrosine kinase                                  | Ros1    | 25346  | 1,43 | down |
| 6339167 | 7223099 | 1430266 | c-ros oncogene 1 , receptor tyrosine kinase                                  | Ros1    | 25346  | 1,02 | down |
| 6349470 | 7223099 | 1430240 | c-ros oncogene 1 , receptor tyrosine kinase                                  | Ros1    | 25346  | 1,03 | down |
| 6350905 | 7223099 | 1430248 | c-ros oncogene 1 , receptor tyrosine kinase                                  | Ros1    | 25346  | 1,00 | down |
| 6357837 | 7223099 | 1430271 | c-ros oncogene 1 , receptor tyrosine kinase                                  | Ros1    | 25346  | 1,44 | up   |
| 6474206 | 7223099 | 1430268 | c-ros oncogene 1 , receptor tyrosine kinase                                  | Ros1    | 25346  | 1,34 | up   |
| 6488595 | 7223099 | 1430264 | c-ros oncogene 1 , receptor tyrosine kinase                                  | Ros1    | 25346  | 1,18 | down |
| 6491505 | 7223099 | 1430258 | c-ros oncogene 1 , receptor tyrosine kinase                                  | Ros1    | 25346  | 1,10 | down |
| 6564361 | 7223099 | 1430272 | c-ros oncogene 1 , receptor tyrosine kinase                                  | Ros1    | 25346  | 1,56 | up   |
| 6576821 | 7223099 | 1430253 | c-ros oncogene 1 , receptor tyrosine kinase                                  | Ros1    | 25346  | 1,44 | up   |
| 6578017 | 7223099 | 1430267 | c-ros oncogene 1 , receptor tyrosine kinase                                  | Ros1    | 25346  | 1,25 | down |
| 6621580 | 7223099 | 1430273 | c-ros oncogene 1 , receptor tyrosine kinase                                  | Ros1    | 25346  | 1,10 | up   |
| 6664303 | 7223099 | 1430277 | c-ros oncogene 1 , receptor tyrosine kinase                                  | Ros1    | 25346  | 2,22 | up   |
| 6700959 | 7223099 | 1430271 | c-ros oncogene 1 , receptor tyrosine kinase                                  | Ros1    | 25346  | 1,37 | up   |
| 6729210 | 7223099 | 1430263 | c-ros oncogene 1 , receptor tyrosine kinase                                  | Ros1    | 25346  | 1,16 | up   |
| 6744067 | 7223099 | 1430274 | c-ros oncogene 1 , receptor tyrosine kinase                                  | Ros1    | 25346  | 1,65 | up   |
| 6372444 | 7233359 | 1456506 | CSRP2 binding protein                                                        | Csrp2bp | 362224 | 1,20 | up   |
| 6423813 | 7233359 | 1456506 | CSRP2 binding protein                                                        | Csrp2bp | 362224 | 1,13 | down |
| 6497712 | 7233359 | 1456519 | CSRP2 binding protein                                                        | Csrp2bp | 362224 | 1,20 | up   |
| 6729587 | 7233359 | 1456504 | CSRP2 binding protein                                                        | Csrp2bp | 362224 | 1,04 | up   |
| 5678642 | 7177631 | 1318859 | CTD (carboxy-terminal domain, RNA polymerase II, polypeptide A) phosphatase, | Ctdp1   | 291414 | 1,04 | up   |
| 5916531 | 7177631 | 1318857 | CTD (carboxy-terminal domain, RNA polymerase II, polypeptide A) phosphatase, | Ctdp1   | 291414 | 1,19 | up   |
| 6016305 | 7177631 | 1318860 | CTD (carboxy-terminal domain, RNA polymerase II, polypeptide A) phosphatase, | Ctdp1   | 291414 | 1,21 | down |
| 6101609 | 7177631 | 1318865 | CTD (carboxy-terminal domain, RNA polymerase II, polypeptide A) phosphatase, | Ctdp1   | 291414 | 1,00 | up   |
| 6118575 | 7177631 | 1318858 | CTD (carboxy-terminal domain, RNA polymerase II, polypeptide A) phosphatase, | Ctdp1   | 291414 | 1,38 | down |
| 6227200 | 7177631 | 1318866 | CTD (carboxy-terminal domain, RNA polymerase II, polypeptide A) phosphatase, | Ctdp1   | 291414 | 1,03 | up   |
| 6241463 | 7177631 | 1318862 | CTD (carboxy-terminal domain, RNA polymerase II, polypeptide A) phosphatase, | Ctdp1   | 291414 | 1,18 | up   |
| 6263400 | 7177631 | 1318844 | CTD (carboxy-terminal domain, RNA polymerase II, polypeptide A) phosphatase, | Ctdp1   | 291414 | 1,79 | down |
| 6285390 | 7177631 | 1318858 | CTD (carboxy-terminal domain, RNA polymerase II, polypeptide A) phosphatase, | Ctdp1   | 291414 | 1,18 | down |
| 6378311 | 7177631 | 1318856 | CTD (carboxy-terminal domain, RNA polymerase II, polypeptide A) phosphatase, | Ctdp1   | 291414 | 1,11 | down |

|         |         |         |                                                                              |        |        |      |      |
|---------|---------|---------|------------------------------------------------------------------------------|--------|--------|------|------|
| 6461009 | 7177631 | 1318850 | CTD (carboxy-terminal domain, RNA polymerase II, polypeptide A) phosphatase, | Ctdp1  | 291414 | 2,66 | down |
| 6629230 | 7177631 | 1318864 | CTD (carboxy-terminal domain, RNA polymerase II, polypeptide A) phosphatase, | Ctdp1  | 291414 | 1,16 | up   |
| 6652844 | 7177631 | 1318839 | CTD (carboxy-terminal domain, RNA polymerase II, polypeptide A) phosphatase, | Ctdp1  | 291414 | 1,03 | up   |
| 6654861 | 7177631 | 1318863 | CTD (carboxy-terminal domain, RNA polymerase II, polypeptide A) phosphatase, | Ctdp1  | 291414 | 1,31 | up   |
| 6709499 | 7177631 | 1318839 | CTD (carboxy-terminal domain, RNA polymerase II, polypeptide A) phosphatase, | Ctdp1  | 291414 | 1,75 | down |
| 5820893 | 7356027 | 1759983 | CTD (carboxy-terminal domain, RNA polymerase II, polypeptide A) small phosph | Ctdsp1 | 363249 | 1,45 | up   |
| 5862579 | 7356027 | 1759984 | CTD (carboxy-terminal domain, RNA polymerase II, polypeptide A) small phosph | Ctdsp1 | 363249 | 1,28 | down |
| 5929870 | 7356027 | 1759986 | CTD (carboxy-terminal domain, RNA polymerase II, polypeptide A) small phosph | Ctdsp1 | 363249 | 1,11 | up   |
| 5945379 | 7356027 | 1759986 | CTD (carboxy-terminal domain, RNA polymerase II, polypeptide A) small phosph | Ctdsp1 | 363249 | 1,03 | down |
| 6090600 | 7356027 | 1759987 | CTD (carboxy-terminal domain, RNA polymerase II, polypeptide A) small phosph | Ctdsp1 | 363249 | 1,09 | down |
| 6305823 | 7356027 | 1759981 | CTD (carboxy-terminal domain, RNA polymerase II, polypeptide A) small phosph | Ctdsp1 | 363249 | 2,72 | down |
| 6413042 | 7356027 | 1759978 | CTD (carboxy-terminal domain, RNA polymerase II, polypeptide A) small phosph | Ctdsp1 | 363249 | 1,20 | up   |
| 6439126 | 7356027 | 1759985 | CTD (carboxy-terminal domain, RNA polymerase II, polypeptide A) small phosph | Ctdsp1 | 363249 | 1,25 | down |
| 6721398 | 7356027 | 1759985 | CTD (carboxy-terminal domain, RNA polymerase II, polypeptide A) small phosph | Ctdsp1 | 363249 | 1,12 | down |
| 5619026 | 7147416 | 1244425 | CUB and Sushi multiple domains 1                                             | Csmd1  | 364634 | 1,00 | down |
| 5625601 | 7147416 | 1244356 | CUB and Sushi multiple domains 1                                             | Csmd1  | 364634 | 1,02 | up   |
| 5628114 | 7147416 | 1244478 | CUB and Sushi multiple domains 1                                             | Csmd1  | 364634 | 1,41 | down |
| 5652042 | 7147416 | 1244460 | CUB and Sushi multiple domains 1                                             | Csmd1  | 364634 | 1,24 | down |
| 5676203 | 7147416 | 1244484 | CUB and Sushi multiple domains 1                                             | Csmd1  | 364634 | 1,55 | up   |
| 5689964 | 7147416 | 1244442 | CUB and Sushi multiple domains 1                                             | Csmd1  | 364634 | 1,10 | up   |
| 5693080 | 7147416 | 1244422 | CUB and Sushi multiple domains 1                                             | Csmd1  | 364634 | 2,06 | down |
| 5705669 | 7147416 | 1244385 | CUB and Sushi multiple domains 1                                             | Csmd1  | 364634 | 1,27 | up   |
| 5714839 | 7147416 | 1244474 | CUB and Sushi multiple domains 1                                             | Csmd1  | 364634 | 1,37 | down |
| 5737269 | 7147416 | 1244427 | CUB and Sushi multiple domains 1                                             | Csmd1  | 364634 | 1,26 | down |
| 5754750 | 7147416 | 1244487 | CUB and Sushi multiple domains 1                                             | Csmd1  | 364634 | 1,22 | down |
| 5756725 | 7147416 | 1244445 | CUB and Sushi multiple domains 1                                             | Csmd1  | 364634 | 1,01 | down |
| 5779236 | 7147416 | 1244479 | CUB and Sushi multiple domains 1                                             | Csmd1  | 364634 | 1,12 | down |
| 5796721 | 7147416 | 1244413 | CUB and Sushi multiple domains 1                                             | Csmd1  | 364634 | 1,00 | down |
| 5831980 | 7147416 | 1244342 | CUB and Sushi multiple domains 1                                             | Csmd1  | 364634 | 1,09 | down |
| 5834947 | 7147416 | 1244398 | CUB and Sushi multiple domains 1                                             | Csmd1  | 364634 | 1,10 | down |
| 5847414 | 7147416 | 1244421 | CUB and Sushi multiple domains 1                                             | Csmd1  | 364634 | 1,08 | up   |
| 5985598 | 7147416 | 1244417 | CUB and Sushi multiple domains 1                                             | Csmd1  | 364634 | 1,03 | up   |
| 6009136 | 7147416 | 1244455 | CUB and Sushi multiple domains 1                                             | Csmd1  | 364634 | 1,14 | up   |
| 6009216 | 7147416 | 1244433 | CUB and Sushi multiple domains 1                                             | Csmd1  | 364634 | 1,26 | up   |
| 6009438 | 7147416 | 1244392 | CUB and Sushi multiple domains 1                                             | Csmd1  | 364634 | 1,13 | down |
| 6015131 | 7147416 | 1244488 | CUB and Sushi multiple domains 1                                             | Csmd1  | 364634 | 1,78 | up   |
| 6019193 | 7147416 | 1244423 | CUB and Sushi multiple domains 1                                             | Csmd1  | 364634 | 1,00 | up   |
| 6088289 | 7147416 | 1244415 | CUB and Sushi multiple domains 1                                             | Csmd1  | 364634 | 1,39 | up   |
| 6092963 | 7147416 | 1244426 | CUB and Sushi multiple domains 1                                             | Csmd1  | 364634 | 1,05 | down |
| 6094296 | 7147416 | 1244481 | CUB and Sushi multiple domains 1                                             | Csmd1  | 364634 | 1,26 | up   |
| 6101926 | 7147416 | 1244444 | CUB and Sushi multiple domains 1                                             | Csmd1  | 364634 | 1,30 | up   |
| 6107838 | 7147416 | 1244456 | CUB and Sushi multiple domains 1                                             | Csmd1  | 364634 | 1,14 | up   |
| 6120726 | 7147416 | 1244473 | CUB and Sushi multiple domains 1                                             | Csmd1  | 364634 | 1,03 | down |
| 6124370 | 7147416 | 1244431 | CUB and Sushi multiple domains 1                                             | Csmd1  | 364634 | 1,20 | up   |
| 6125074 | 7147416 | 1244483 | CUB and Sushi multiple domains 1                                             | Csmd1  | 364634 | 1,01 | down |
| 6142365 | 7147416 | 1244467 | CUB and Sushi multiple domains 1                                             | Csmd1  | 364634 | 1,62 | up   |
| 6151390 | 7147416 | 1244425 | CUB and Sushi multiple domains 1                                             | Csmd1  | 364634 | 1,03 | up   |
| 6160265 | 7147416 | 1244389 | CUB and Sushi multiple domains 1                                             | Csmd1  | 364634 | 1,29 | up   |
| 6165282 | 7147416 | 1244301 | CUB and Sushi multiple domains 1                                             | Csmd1  | 364634 | 1,02 | down |
| 6165969 | 7147416 | 1244466 | CUB and Sushi multiple domains 1                                             | Csmd1  | 364634 | 1,26 | up   |
| 6170196 | 7147416 | 1244418 | CUB and Sushi multiple domains 1                                             | Csmd1  | 364634 | 1,12 | down |
| 6188051 | 7147416 | 1244470 | CUB and Sushi multiple domains 1                                             | Csmd1  | 364634 | 1,24 | up   |
| 6213789 | 7147416 | 1244460 | CUB and Sushi multiple domains 1                                             | Csmd1  | 364634 | 1,03 | down |
| 6217946 | 7147416 | 1244463 | CUB and Sushi multiple domains 1                                             | Csmd1  | 364634 | 1,39 | down |
| 6225372 | 7147416 | 1244396 | CUB and Sushi multiple domains 1                                             | Csmd1  | 364634 | 1,06 | down |
| 6279759 | 7147416 | 1244391 | CUB and Sushi multiple domains 1                                             | Csmd1  | 364634 | 1,01 | down |

|         |         |         |                                  |       |        |      |      |
|---------|---------|---------|----------------------------------|-------|--------|------|------|
| 6310630 | 7147416 | 1244480 | CUB and Sushi multiple domains 1 | Csmd1 | 364634 | 2,24 | down |
| 6312234 | 7147416 | 1244419 | CUB and Sushi multiple domains 1 | Csmd1 | 364634 | 1,11 | down |
| 6346348 | 7147416 | 1244465 | CUB and Sushi multiple domains 1 | Csmd1 | 364634 | 1,43 | up   |
| 6365459 | 7147416 | 1244398 | CUB and Sushi multiple domains 1 | Csmd1 | 364634 | 2,62 | down |
| 6395524 | 7147416 | 1244486 | CUB and Sushi multiple domains 1 | Csmd1 | 364634 | 1,31 | up   |
| 6404690 | 7147416 | 1244389 | CUB and Sushi multiple domains 1 | Csmd1 | 364634 | 1,14 | down |
| 6407081 | 7147416 | 1244430 | CUB and Sushi multiple domains 1 | Csmd1 | 364634 | 1,10 | up   |
| 6410036 | 7147416 | 1244439 | CUB and Sushi multiple domains 1 | Csmd1 | 364634 | 1,01 | down |
| 6411361 | 7147416 | 1244472 | CUB and Sushi multiple domains 1 | Csmd1 | 364634 | 1,24 | up   |
| 6413763 | 7147416 | 1244433 | CUB and Sushi multiple domains 1 | Csmd1 | 364634 | 1,87 | down |
| 6431407 | 7147416 | 1244361 | CUB and Sushi multiple domains 1 | Csmd1 | 364634 | 1,04 | up   |
| 6441125 | 7147416 | 1244288 | CUB and Sushi multiple domains 1 | Csmd1 | 364634 | 1,06 | down |
| 6450821 | 7147416 | 1244363 | CUB and Sushi multiple domains 1 | Csmd1 | 364634 | 1,55 | up   |
| 6455987 | 7147416 | 1244435 | CUB and Sushi multiple domains 1 | Csmd1 | 364634 | 1,15 | up   |
| 6461527 | 7147416 | 1244477 | CUB and Sushi multiple domains 1 | Csmd1 | 364634 | 1,47 | down |
| 6477735 | 7147416 | 1244448 | CUB and Sushi multiple domains 1 | Csmd1 | 364634 | 1,37 | up   |
| 6496508 | 7147416 | 1244373 | CUB and Sushi multiple domains 1 | Csmd1 | 364634 | 1,24 | down |
| 6499566 | 7147416 | 1244386 | CUB and Sushi multiple domains 1 | Csmd1 | 364634 | 1,02 | down |
| 6499875 | 7147416 | 1244410 | CUB and Sushi multiple domains 1 | Csmd1 | 364634 | 1,03 | down |
| 6500887 | 7147416 | 1244424 | CUB and Sushi multiple domains 1 | Csmd1 | 364634 | 1,18 | up   |
| 6503846 | 7147416 | 1244402 | CUB and Sushi multiple domains 1 | Csmd1 | 364634 | 1,46 | down |
| 6539544 | 7147416 | 1244387 | CUB and Sushi multiple domains 1 | Csmd1 | 364634 | 1,14 | down |
| 6560831 | 7147416 | 1244373 | CUB and Sushi multiple domains 1 | Csmd1 | 364634 | 1,06 | up   |
| 6574024 | 7147416 | 1244446 | CUB and Sushi multiple domains 1 | Csmd1 | 364634 | 1,02 | up   |
| 6576331 | 7147416 | 1244376 | CUB and Sushi multiple domains 1 | Csmd1 | 364634 | 1,66 | down |
| 6611353 | 7147416 | 1244351 | CUB and Sushi multiple domains 1 | Csmd1 | 364634 | 1,16 | down |
| 6612302 | 7147416 | 1244409 | CUB and Sushi multiple domains 1 | Csmd1 | 364634 | 1,25 | down |
| 6612807 | 7147416 | 1244304 | CUB and Sushi multiple domains 1 | Csmd1 | 364634 | 1,43 | up   |
| 6630847 | 7147416 | 1244471 | CUB and Sushi multiple domains 1 | Csmd1 | 364634 | 1,03 | down |
| 6667534 | 7147416 | 1244395 | CUB and Sushi multiple domains 1 | Csmd1 | 364634 | 1,09 | down |
| 6692858 | 7147416 | 1244441 | CUB and Sushi multiple domains 1 | Csmd1 | 364634 | 1,00 | down |
| 6701921 | 7147416 | 1244443 | CUB and Sushi multiple domains 1 | Csmd1 | 364634 | 1,84 | up   |
| 6730876 | 7147416 | 1244399 | CUB and Sushi multiple domains 1 | Csmd1 | 364634 | 1,13 | down |
| 5628198 | 7372840 | 1803774 | cullin 4B                        | Cul4b | 302502 | 1,17 | down |
| 5674923 | 7372840 | 1803776 | cullin 4B                        | Cul4b | 302502 | 1,32 | down |
| 5676594 | 7372840 | 1803770 | cullin 4B                        | Cul4b | 302502 | 1,02 | up   |
| 5831328 | 7372840 | 1803766 | cullin 4B                        | Cul4b | 302502 | 1,23 | up   |
| 5868312 | 7372840 | 1803770 | cullin 4B                        | Cul4b | 302502 | 1,05 | up   |
| 5898244 | 7372840 | 1803788 | cullin 4B                        | Cul4b | 302502 | 2,01 | down |
| 5898431 | 7372840 | 1803771 | cullin 4B                        | Cul4b | 302502 | 1,32 | up   |
| 5947292 | 7372840 | 1803785 | cullin 4B                        | Cul4b | 302502 | 1,08 | up   |
| 5949845 | 7372840 | 1803770 | cullin 4B                        | Cul4b | 302502 | 1,08 | down |
| 6008158 | 7372840 | 1803777 | cullin 4B                        | Cul4b | 302502 | 1,20 | up   |
| 6016556 | 7372840 | 1803789 | cullin 4B                        | Cul4b | 302502 | 1,60 | down |
| 6079630 | 7372840 | 1803780 | cullin 4B                        | Cul4b | 302502 | 1,10 | down |
| 6087300 | 7372840 | 1803783 | cullin 4B                        | Cul4b | 302502 | 1,25 | down |
| 6226885 | 7372840 | 1803779 | cullin 4B                        | Cul4b | 302502 | 1,01 | up   |
| 6310825 | 7372840 | 1803781 | cullin 4B                        | Cul4b | 302502 | 1,17 | down |
| 6316586 | 7372840 | 1803765 | cullin 4B                        | Cul4b | 302502 | 1,37 | down |
| 6347079 | 7372840 | 1803768 | cullin 4B                        | Cul4b | 302502 | 1,04 | down |
| 6451328 | 7372840 | 1803775 | cullin 4B                        | Cul4b | 302502 | 1,08 | down |
| 6451914 | 7372840 | 1803787 | cullin 4B                        | Cul4b | 302502 | 1,01 | down |
| 6464681 | 7372840 | 1803784 | cullin 4B                        | Cul4b | 302502 | 1,08 | up   |
| 6481057 | 7372840 | 1803782 | cullin 4B                        | Cul4b | 302502 | 1,16 | up   |
| 6516858 | 7372840 | 1803789 | cullin 4B                        | Cul4b | 302502 | 1,91 | down |
| 6585475 | 7372840 | 1803770 | cullin 4B                        | Cul4b | 302502 | 1,09 | up   |

|         |         |         |                                         |       |        |      |      |
|---------|---------|---------|-----------------------------------------|-------|--------|------|------|
| 6603060 | 7372840 | 1803778 | cullin 4B                               | Cul4b | 302502 | 1,07 | down |
| 6624276 | 7372840 | 1803772 | cullin 4B                               | Cul4b | 302502 | 1,29 | up   |
| 6636667 | 7372840 | 1803786 | cullin 4B                               | Cul4b | 302502 | 1,03 | down |
| 5658070 | 7098411 | 1123713 | cut-like homeobox 2                     | Cux2  | 288665 | 1,52 | down |
| 5843088 | 7098411 | 1123721 | cut-like homeobox 2                     | Cux2  | 288665 | 1,51 | down |
| 5860920 | 7098411 | 1123715 | cut-like homeobox 2                     | Cux2  | 288665 | 1,00 | up   |
| 5870698 | 7098411 | 1123709 | cut-like homeobox 2                     | Cux2  | 288665 | 1,02 | up   |
| 5895976 | 7098411 | 1123704 | cut-like homeobox 2                     | Cux2  | 288665 | 1,53 | up   |
| 5964347 | 7098411 | 1123737 | cut-like homeobox 2                     | Cux2  | 288665 | 1,09 | down |
| 6094832 | 7098411 | 1123737 | cut-like homeobox 2                     | Cux2  | 288665 | 1,27 | down |
| 6128077 | 7098411 | 1123722 | cut-like homeobox 2                     | Cux2  | 288665 | 1,47 | down |
| 6146315 | 7098411 | 1123725 | cut-like homeobox 2                     | Cux2  | 288665 | 1,20 | down |
| 6161184 | 7098411 | 1123733 | cut-like homeobox 2                     | Cux2  | 288665 | 1,37 | down |
| 6162317 | 7098411 | 1123727 | cut-like homeobox 2                     | Cux2  | 288665 | 1,03 | down |
| 6164123 | 7098411 | 1123714 | cut-like homeobox 2                     | Cux2  | 288665 | 1,16 | down |
| 6167566 | 7098411 | 1123724 | cut-like homeobox 2                     | Cux2  | 288665 | 2,74 | down |
| 6281481 | 7098411 | 1123726 | cut-like homeobox 2                     | Cux2  | 288665 | 1,18 | down |
| 6304754 | 7098411 | 1123737 | cut-like homeobox 2                     | Cux2  | 288665 | 1,43 | up   |
| 6357094 | 7098411 | 1123713 | cut-like homeobox 2                     | Cux2  | 288665 | 1,05 | up   |
| 6362192 | 7098411 | 1123734 | cut-like homeobox 2                     | Cux2  | 288665 | 1,02 | down |
| 6375234 | 7098411 | 1123736 | cut-like homeobox 2                     | Cux2  | 288665 | 1,54 | down |
| 6384311 | 7098411 | 1123720 | cut-like homeobox 2                     | Cux2  | 288665 | 1,55 | down |
| 6476481 | 7098411 | 1123726 | cut-like homeobox 2                     | Cux2  | 288665 | 1,66 | up   |
| 6525377 | 7098411 | 1123716 | cut-like homeobox 2                     | Cux2  | 288665 | 1,03 | down |
| 6569983 | 7098411 | 1123737 | cut-like homeobox 2                     | Cux2  | 288665 | 1,83 | down |
| 5626315 | 7172066 | 1304744 | CXXC finger 1 (PHD domain)              | Cxxc1 | 291440 | 1,07 | up   |
| 5676658 | 7172066 | 1304737 | CXXC finger 1 (PHD domain)              | Cxxc1 | 291440 | 1,08 | down |
| 5995011 | 7172066 | 1304744 | CXXC finger 1 (PHD domain)              | Cxxc1 | 291440 | 1,33 | down |
| 6025714 | 7172066 | 1304739 | CXXC finger 1 (PHD domain)              | Cxxc1 | 291440 | 1,24 | up   |
| 6040523 | 7172066 | 1304737 | CXXC finger 1 (PHD domain)              | Cxxc1 | 291440 | 1,08 | up   |
| 6105297 | 7172066 | 1304742 | CXXC finger 1 (PHD domain)              | Cxxc1 | 291440 | 2,11 | up   |
| 6182422 | 7172066 | 1304737 | CXXC finger 1 (PHD domain)              | Cxxc1 | 291440 | 1,00 | up   |
| 6234080 | 7172066 | 1304744 | CXXC finger 1 (PHD domain)              | Cxxc1 | 291440 | 1,24 | up   |
| 6295432 | 7172066 | 1304737 | CXXC finger 1 (PHD domain)              | Cxxc1 | 291440 | 1,01 | up   |
| 6320665 | 7172066 | 1304744 | CXXC finger 1 (PHD domain)              | Cxxc1 | 291440 | 1,00 | down |
| 6324339 | 7172066 | 1304741 | CXXC finger 1 (PHD domain)              | Cxxc1 | 291440 | 1,27 | down |
| 6353563 | 7172066 | 1304740 | CXXC finger 1 (PHD domain)              | Cxxc1 | 291440 | 1,21 | up   |
| 6451715 | 7172066 | 1304736 | CXXC finger 1 (PHD domain)              | Cxxc1 | 291440 | 1,20 | up   |
| 6469974 | 7172066 | 1304734 | CXXC finger 1 (PHD domain)              | Cxxc1 | 291440 | 1,23 | down |
| 6485341 | 7172066 | 1304743 | CXXC finger 1 (PHD domain)              | Cxxc1 | 291440 | 1,01 | up   |
| 6516684 | 7172066 | 1304744 | CXXC finger 1 (PHD domain)              | Cxxc1 | 291440 | 1,04 | down |
| 6517460 | 7172066 | 1304738 | CXXC finger 1 (PHD domain)              | Cxxc1 | 291440 | 1,30 | up   |
| 6667422 | 7172066 | 1304738 | CXXC finger 1 (PHD domain)              | Cxxc1 | 291440 | 1,21 | up   |
| 6680610 | 7172066 | 1304737 | CXXC finger 1 (PHD domain)              | Cxxc1 | 291440 | 1,20 | down |
| 6732281 | 7172066 | 1304735 | CXXC finger 1 (PHD domain)              | Cxxc1 | 291440 | 1,14 | up   |
| 5643506 | 7353522 | 1753518 | cyclic nucleotide gated channel alpha 3 | Cnga3 | 85257  | 1,17 | up   |
| 5680205 | 7353522 | 1753519 | cyclic nucleotide gated channel alpha 3 | Cnga3 | 85257  | 1,29 | down |
| 5989508 | 7353522 | 1753515 | cyclic nucleotide gated channel alpha 3 | Cnga3 | 85257  | 2,03 | down |
| 6312891 | 7353522 | 1753514 | cyclic nucleotide gated channel alpha 3 | Cnga3 | 85257  | 1,11 | up   |
| 6413520 | 7353522 | 1753517 | cyclic nucleotide gated channel alpha 3 | Cnga3 | 85257  | 1,26 | down |
| 6418186 | 7353522 | 1753518 | cyclic nucleotide gated channel alpha 3 | Cnga3 | 85257  | 1,29 | down |
| 6588845 | 7353522 | 1753518 | cyclic nucleotide gated channel alpha 3 | Cnga3 | 85257  | 1,22 | up   |
| 6679530 | 7353522 | 1753516 | cyclic nucleotide gated channel alpha 3 | Cnga3 | 85257  | 1,11 | up   |
| 5635925 | 7178662 | 1321637 | cyclic nucleotide gated channel beta 1  | Cngb1 | 83686  | 1,14 | down |
| 5676781 | 7178662 | 1321635 | cyclic nucleotide gated channel beta 1  | Cngb1 | 83686  | 1,55 | up   |
| 5736829 | 7178662 | 1321655 | cyclic nucleotide gated channel beta 1  | Cngb1 | 83686  | 1,03 | up   |



|         |         |         |                                        |       |        |      |      |
|---------|---------|---------|----------------------------------------|-------|--------|------|------|
| 5747505 | 7178662 | 1321662 | cyclic nucleotide gated channel beta 1 | Cngb1 | 83686  | 1,07 | up   |
| 5759082 | 7178662 | 1321658 | cyclic nucleotide gated channel beta 1 | Cngb1 | 83686  | 1,14 | up   |
| 5761828 | 7178662 | 1321651 | cyclic nucleotide gated channel beta 1 | Cngb1 | 83686  | 1,34 | down |
| 5774742 | 7178662 | 1321634 | cyclic nucleotide gated channel beta 1 | Cngb1 | 83686  | 1,77 | down |
| 5783275 | 7178662 | 1321644 | cyclic nucleotide gated channel beta 1 | Cngb1 | 83686  | 1,84 | down |
| 5815707 | 7178662 | 1321646 | cyclic nucleotide gated channel beta 1 | Cngb1 | 83686  | 1,06 | up   |
| 5823561 | 7178662 | 1321664 | cyclic nucleotide gated channel beta 1 | Cngb1 | 83686  | 1,06 | down |
| 5880558 | 7178662 | 1321640 | cyclic nucleotide gated channel beta 1 | Cngb1 | 83686  | 1,21 | down |
| 5903509 | 7178662 | 1321641 | cyclic nucleotide gated channel beta 1 | Cngb1 | 83686  | 1,64 | down |
| 5945540 | 7178662 | 1321643 | cyclic nucleotide gated channel beta 1 | Cngb1 | 83686  | 1,16 | down |
| 5947189 | 7178662 | 1321642 | cyclic nucleotide gated channel beta 1 | Cngb1 | 83686  | 1,45 | down |
| 5950376 | 7178662 | 1321654 | cyclic nucleotide gated channel beta 1 | Cngb1 | 83686  | 2,34 | down |
| 6000758 | 7178662 | 1321638 | cyclic nucleotide gated channel beta 1 | Cngb1 | 83686  | 1,01 | down |
| 6017638 | 7178662 | 1321660 | cyclic nucleotide gated channel beta 1 | Cngb1 | 83686  | 1,31 | up   |
| 6078944 | 7178662 | 1321667 | cyclic nucleotide gated channel beta 1 | Cngb1 | 83686  | 1,03 | up   |
| 6131351 | 7178662 | 1321636 | cyclic nucleotide gated channel beta 1 | Cngb1 | 83686  | 1,38 | down |
| 6184116 | 7178662 | 1321656 | cyclic nucleotide gated channel beta 1 | Cngb1 | 83686  | 1,37 | down |
| 6199881 | 7178662 | 1321669 | cyclic nucleotide gated channel beta 1 | Cngb1 | 83686  | 1,70 | down |
| 6223515 | 7178662 | 1321652 | cyclic nucleotide gated channel beta 1 | Cngb1 | 83686  | 1,04 | up   |
| 6233543 | 7178662 | 1321661 | cyclic nucleotide gated channel beta 1 | Cngb1 | 83686  | 1,53 | down |
| 6296287 | 7178662 | 1321653 | cyclic nucleotide gated channel beta 1 | Cngb1 | 83686  | 1,28 | up   |
| 6333731 | 7178662 | 1321654 | cyclic nucleotide gated channel beta 1 | Cngb1 | 83686  | 1,13 | up   |
| 6369209 | 7178662 | 1321645 | cyclic nucleotide gated channel beta 1 | Cngb1 | 83686  | 1,39 | up   |
| 6426832 | 7178662 | 1321649 | cyclic nucleotide gated channel beta 1 | Cngb1 | 83686  | 1,10 | down |
| 6450509 | 7178662 | 1321657 | cyclic nucleotide gated channel beta 1 | Cngb1 | 83686  | 1,15 | down |
| 6456318 | 7178662 | 1321666 | cyclic nucleotide gated channel beta 1 | Cngb1 | 83686  | 1,07 | down |
| 6466276 | 7178662 | 1321668 | cyclic nucleotide gated channel beta 1 | Cngb1 | 83686  | 1,04 | down |
| 6496062 | 7178662 | 1321659 | cyclic nucleotide gated channel beta 1 | Cngb1 | 83686  | 1,11 | up   |
| 6505022 | 7178662 | 1321650 | cyclic nucleotide gated channel beta 1 | Cngb1 | 83686  | 1,32 | down |
| 6564236 | 7178662 | 1321652 | cyclic nucleotide gated channel beta 1 | Cngb1 | 83686  | 1,37 | down |
| 6565534 | 7178662 | 1321663 | cyclic nucleotide gated channel beta 1 | Cngb1 | 83686  | 1,04 | up   |
| 6579325 | 7178662 | 1321635 | cyclic nucleotide gated channel beta 1 | Cngb1 | 83686  | 1,96 | up   |
| 6588598 | 7178662 | 1321665 | cyclic nucleotide gated channel beta 1 | Cngb1 | 83686  | 1,02 | down |
| 6666562 | 7178662 | 1321639 | cyclic nucleotide gated channel beta 1 | Cngb1 | 83686  | 1,78 | down |
| 6688660 | 7178662 | 1321647 | cyclic nucleotide gated channel beta 1 | Cngb1 | 83686  | 1,51 | up   |
| 6713009 | 7178662 | 1321646 | cyclic nucleotide gated channel beta 1 | Cngb1 | 83686  | 1,35 | up   |
| 6729395 | 7178662 | 1321646 | cyclic nucleotide gated channel beta 1 | Cngb1 | 83686  | 1,24 | up   |
| 5675699 | 7273220 | 1555867 | cyclin C                               | Ccnc  | 114839 | 1,20 | up   |
| 5944840 | 7273220 | 1555861 | cyclin C                               | Ccnc  | 114839 | 1,05 | down |
| 5951312 | 7273220 | 1555852 | cyclin C                               | Ccnc  | 114839 | 1,25 | up   |
| 5992940 | 7273220 | 1555865 | cyclin C                               | Ccnc  | 114839 | 1,19 | down |
| 6027784 | 7273220 | 1555864 | cyclin C                               | Ccnc  | 114839 | 1,09 | up   |
| 6038271 | 7273220 | 1555867 | cyclin C                               | Ccnc  | 114839 | 1,03 | down |
| 6237055 | 7273220 | 1555854 | cyclin C                               | Ccnc  | 114839 | 1,00 | up   |
| 6239082 | 7273220 | 1555858 | cyclin C                               | Ccnc  | 114839 | 1,28 | up   |
| 6282886 | 7273220 | 1555859 | cyclin C                               | Ccnc  | 114839 | 2,05 | up   |
| 6364311 | 7273220 | 1555852 | cyclin C                               | Ccnc  | 114839 | 1,71 | down |
| 6387613 | 7273220 | 1555855 | cyclin C                               | Ccnc  | 114839 | 1,20 | down |
| 6455209 | 7273220 | 1555862 | cyclin C                               | Ccnc  | 114839 | 1,26 | up   |
| 6475425 | 7273220 | 1555856 | cyclin C                               | Ccnc  | 114839 | 1,06 | up   |
| 6554899 | 7273220 | 1555852 | cyclin C                               | Ccnc  | 114839 | 1,41 | up   |
| 6660061 | 7273220 | 1555868 | cyclin C                               | Ccnc  | 114839 | 1,19 | down |
| 6690714 | 7273220 | 1555857 | cyclin C                               | Ccnc  | 114839 | 1,05 | up   |
| 5672022 | 7353441 | 1753341 | cyclin M3                              | Cnnm3 | 301345 | 1,32 | up   |
| 5824057 | 7353441 | 1753336 | cyclin M3                              | Cnnm3 | 301345 | 1,09 | up   |
| 5915425 | 7353441 | 1753332 | cyclin M3                              | Cnnm3 | 301345 | 1,08 | up   |

|         |         |         |                                              |        |        |      |      |
|---------|---------|---------|----------------------------------------------|--------|--------|------|------|
| 5954927 | 7353441 | 1753339 | cyclin M3                                    | Cnnm3  | 301345 | 2,01 | down |
| 5997445 | 7353441 | 1753343 | cyclin M3                                    | Cnnm3  | 301345 | 1,02 | up   |
| 6101036 | 7353441 | 1753332 | cyclin M3                                    | Cnnm3  | 301345 | 1,20 | up   |
| 6210380 | 7353441 | 1753338 | cyclin M3                                    | Cnnm3  | 301345 | 1,03 | up   |
| 6577061 | 7353441 | 1753340 | cyclin M3                                    | Cnnm3  | 301345 | 1,20 | down |
| 6653374 | 7353441 | 1753334 | cyclin M3                                    | Cnnm3  | 301345 | 1,19 | up   |
| 5682014 | 7355421 | 1758517 | cyclin Y-like 1                              | Ccnyl1 | 316452 | 1,24 | up   |
| 5684278 | 7355421 | 1758523 | cyclin Y-like 1                              | Ccnyl1 | 316452 | 1,07 | down |
| 5891148 | 7355421 | 1758520 | cyclin Y-like 1                              | Ccnyl1 | 316452 | 1,69 | down |
| 5963449 | 7355421 | 1758521 | cyclin Y-like 1                              | Ccnyl1 | 316452 | 1,24 | down |
| 5971914 | 7355421 | 1758515 | cyclin Y-like 1                              | Ccnyl1 | 316452 | 1,40 | down |
| 6158477 | 7355421 | 1758522 | cyclin Y-like 1                              | Ccnyl1 | 316452 | 1,24 | down |
| 6192831 | 7355421 | 1758518 | cyclin Y-like 1                              | Ccnyl1 | 316452 | 1,19 | down |
| 6235560 | 7355421 | 1758520 | cyclin Y-like 1                              | Ccnyl1 | 316452 | 1,35 | down |
| 6243318 | 7355421 | 1758524 | cyclin Y-like 1                              | Ccnyl1 | 316452 | 1,09 | down |
| 6246229 | 7355421 | 1758522 | cyclin Y-like 1                              | Ccnyl1 | 316452 | 1,25 | down |
| 6404143 | 7355421 | 1758519 | cyclin Y-like 1                              | Ccnyl1 | 316452 | 1,06 | up   |
| 6475045 | 7355421 | 1758516 | cyclin Y-like 1                              | Ccnyl1 | 316452 | 1,09 | down |
| 6680194 | 7355421 | 1758513 | cyclin Y-like 1                              | Ccnyl1 | 316452 | 1,04 | up   |
| 5621180 | 7221453 | 1426344 | cystathionine beta synthase                  | Cbs    | 24250  | 2,19 | down |
| 5622452 | 7221453 | 1426352 | cystathionine beta synthase                  | Cbs    | 24250  | 1,02 | up   |
| 5638829 | 7221453 | 1426345 | cystathionine beta synthase                  | Cbs    | 24250  | 1,15 | up   |
| 5652261 | 7221453 | 1426342 | cystathionine beta synthase                  | Cbs    | 24250  | 1,28 | down |
| 5684879 | 7221453 | 1426355 | cystathionine beta synthase                  | Cbs    | 24250  | 1,11 | down |
| 5735151 | 7221453 | 1426339 | cystathionine beta synthase                  | Cbs    | 24250  | 1,02 | down |
| 5756102 | 7221453 | 1426357 | cystathionine beta synthase                  | Cbs    | 24250  | 1,06 | up   |
| 5772342 | 7221453 | 1426351 | cystathionine beta synthase                  | Cbs    | 24250  | 1,05 | up   |
| 5811579 | 7221453 | 1426346 | cystathionine beta synthase                  | Cbs    | 24250  | 1,59 | up   |
| 5844010 | 7221453 | 1426357 | cystathionine beta synthase                  | Cbs    | 24250  | 1,53 | down |
| 6025777 | 7221453 | 1426348 | cystathionine beta synthase                  | Cbs    | 24250  | 1,39 | down |
| 6051874 | 7221453 | 1426340 | cystathionine beta synthase                  | Cbs    | 24250  | 1,02 | up   |
| 6285493 | 7221453 | 1426350 | cystathionine beta synthase                  | Cbs    | 24250  | 1,22 | up   |
| 6317080 | 7221453 | 1426354 | cystathionine beta synthase                  | Cbs    | 24250  | 1,17 | down |
| 6330295 | 7221453 | 1426356 | cystathionine beta synthase                  | Cbs    | 24250  | 1,01 | down |
| 6367953 | 7221453 | 1426349 | cystathionine beta synthase                  | Cbs    | 24250  | 1,37 | up   |
| 6390957 | 7221453 | 1426347 | cystathionine beta synthase                  | Cbs    | 24250  | 1,23 | up   |
| 6418589 | 7221453 | 1426343 | cystathionine beta synthase                  | Cbs    | 24250  | 1,33 | up   |
| 6687304 | 7221453 | 1426353 | cystathionine beta synthase                  | Cbs    | 24250  | 1,09 | down |
| 6729025 | 7221453 | 1426355 | cystathionine beta synthase                  | Cbs    | 24250  | 1,10 | up   |
| 6740683 | 7221453 | 1426355 | cystathionine beta synthase                  | Cbs    | 24250  | 1,19 | down |
| 5651794 | 7314821 | 1659018 | cysteine and glycine-rich protein 2          | Csrp2  | 29317  | 2,03 | down |
| 5819359 | 7314821 | 1659018 | cysteine and glycine-rich protein 2          | Csrp2  | 29317  | 1,05 | up   |
| 5960099 | 7314821 | 1659019 | cysteine and glycine-rich protein 2          | Csrp2  | 29317  | 1,10 | up   |
| 6014536 | 7314821 | 1659018 | cysteine and glycine-rich protein 2          | Csrp2  | 29317  | 1,01 | down |
| 6100787 | 7314821 | 1659015 | cysteine and glycine-rich protein 2          | Csrp2  | 29317  | 1,23 | down |
| 6339794 | 7314821 | 1659017 | cysteine and glycine-rich protein 2          | Csrp2  | 29317  | 1,30 | down |
| 6459833 | 7314821 | 1659018 | cysteine and glycine-rich protein 2          | Csrp2  | 29317  | 1,54 | down |
| 6710306 | 7314821 | 1659016 | cysteine and glycine-rich protein 2          | Csrp2  | 29317  | 1,49 | up   |
| 6653387 | 7263152 | 1530364 | cysteine rich BMP regulator 2 (chordin like) | Crim2  | 296952 | 1,16 | down |
| 5732737 | 7332099 | 1700792 | cysteine sulfinic acid decarboxylase         | Csad   | 60356  | 1,18 | up   |
| 5766912 | 7332099 | 1700805 | cysteine sulfinic acid decarboxylase         | Csad   | 60356  | 1,05 | up   |
| 5891926 | 7332099 | 1700799 | cysteine sulfinic acid decarboxylase         | Csad   | 60356  | 1,16 | down |
| 5921457 | 7332099 | 1700807 | cysteine sulfinic acid decarboxylase         | Csad   | 60356  | 1,76 | up   |
| 5936784 | 7332099 | 1700806 | cysteine sulfinic acid decarboxylase         | Csad   | 60356  | 1,45 | up   |
| 6118198 | 7332099 | 1700796 | cysteine sulfinic acid decarboxylase         | Csad   | 60356  | 1,24 | up   |
| 6175686 | 7332099 | 1700804 | cysteine sulfinic acid decarboxylase         | Csad   | 60356  | 1,30 | up   |

|         |         |         |                                                          |         |        |      |      |
|---------|---------|---------|----------------------------------------------------------|---------|--------|------|------|
| 6236959 | 7332099 | 1700801 | cysteine sulfinic acid decarboxylase                     | Csad    | 60356  | 1,28 | down |
| 6237408 | 7332099 | 1700793 | cysteine sulfinic acid decarboxylase                     | Csad    | 60356  | 1,32 | up   |
| 6251375 | 7332099 | 1700802 | cysteine sulfinic acid decarboxylase                     | Csad    | 60356  | 1,07 | up   |
| 6349165 | 7332099 | 1700797 | cysteine sulfinic acid decarboxylase                     | Csad    | 60356  | 1,43 | up   |
| 6353164 | 7332099 | 1700795 | cysteine sulfinic acid decarboxylase                     | Csad    | 60356  | 1,17 | up   |
| 6491377 | 7332099 | 1700800 | cysteine sulfinic acid decarboxylase                     | Csad    | 60356  | 1,16 | up   |
| 6644329 | 7332099 | 1700792 | cysteine sulfinic acid decarboxylase                     | Csad    | 60356  | 1,21 | up   |
| 6656497 | 7332099 | 1700803 | cysteine sulfinic acid decarboxylase                     | Csad    | 60356  | 2,66 | down |
| 6666108 | 7332099 | 1700791 | cysteine sulfinic acid decarboxylase                     | Csad    | 60356  | 1,40 | up   |
| 6668038 | 7332099 | 1700798 | cysteine sulfinic acid decarboxylase                     | Csad    | 60356  | 1,44 | down |
| 6685359 | 7332099 | 1700794 | cysteine sulfinic acid decarboxylase                     | Csad    | 60356  | 1,25 | down |
| 5649356 | 7376206 | 1811979 | cysteine-rich hydrophobic domain 1                       | Chic1   | 363484 | 1,09 | down |
| 6513207 | 7376206 | 1811972 | cysteine-rich hydrophobic domain 1                       | Chic1   | 363484 | 1,26 | up   |
| 5786104 | 7296860 | 1613440 | cytidine monophosphate (UMP-CMP) kinase 2, mitochondrial | Cmpk2   | 314004 | 1,12 | up   |
| 6122175 | 7296860 | 1613435 | cytidine monophosphate (UMP-CMP) kinase 2, mitochondrial | Cmpk2   | 314004 | 1,62 | down |
| 6190723 | 7296860 | 1613438 | cytidine monophosphate (UMP-CMP) kinase 2, mitochondrial | Cmpk2   | 314004 | 1,45 | up   |
| 6211752 | 7296860 | 1613435 | cytidine monophosphate (UMP-CMP) kinase 2, mitochondrial | Cmpk2   | 314004 | 2,04 | up   |
| 6272054 | 7296860 | 1613437 | cytidine monophosphate (UMP-CMP) kinase 2, mitochondrial | Cmpk2   | 314004 | 1,96 | up   |
| 6369627 | 7296860 | 1613440 | cytidine monophosphate (UMP-CMP) kinase 2, mitochondrial | Cmpk2   | 314004 | 1,12 | up   |
| 6431137 | 7296860 | 1613439 | cytidine monophosphate (UMP-CMP) kinase 2, mitochondrial | Cmpk2   | 314004 | 1,90 | down |
| 6577360 | 7296860 | 1613439 | cytidine monophosphate (UMP-CMP) kinase 2, mitochondrial | Cmpk2   | 314004 | 1,26 | down |
| 6688514 | 7296860 | 1613439 | cytidine monophosphate (UMP-CMP) kinase 2, mitochondrial | Cmpk2   | 314004 | 1,06 | down |
| 5756871 | 7379801 | 1820330 | cytochrome b-245, beta polypeptide                       | Cybb    | 66021  | 1,09 | up   |
| 5757022 | 7379801 | 1820332 | cytochrome b-245, beta polypeptide                       | Cybb    | 66021  | 2,19 | up   |
| 5776519 | 7379801 | 1820336 | cytochrome b-245, beta polypeptide                       | Cybb    | 66021  | 1,34 | up   |
| 5816855 | 7379801 | 1820327 | cytochrome b-245, beta polypeptide                       | Cybb    | 66021  | 1,37 | down |
| 5838473 | 7379801 | 1820329 | cytochrome b-245, beta polypeptide                       | Cybb    | 66021  | 2,07 | down |
| 5925037 | 7379801 | 1820338 | cytochrome b-245, beta polypeptide                       | Cybb    | 66021  | 1,26 | down |
| 5964421 | 7379801 | 1820339 | cytochrome b-245, beta polypeptide                       | Cybb    | 66021  | 1,14 | up   |
| 6126289 | 7379801 | 1820331 | cytochrome b-245, beta polypeptide                       | Cybb    | 66021  | 1,06 | down |
| 6352424 | 7379801 | 1820327 | cytochrome b-245, beta polypeptide                       | Cybb    | 66021  | 1,85 | up   |
| 6369732 | 7379801 | 1820335 | cytochrome b-245, beta polypeptide                       | Cybb    | 66021  | 1,27 | down |
| 6581853 | 7379801 | 1820328 | cytochrome b-245, beta polypeptide                       | Cybb    | 66021  | 1,43 | up   |
| 6614162 | 7379801 | 1820326 | cytochrome b-245, beta polypeptide                       | Cybb    | 66021  | 1,17 | down |
| 6663063 | 7379801 | 1820337 | cytochrome b-245, beta polypeptide                       | Cybb    | 66021  | 1,33 | down |
| 6696934 | 7379801 | 1820334 | cytochrome b-245, beta polypeptide                       | Cybb    | 66021  | 1,34 | up   |
| 6734774 | 7379801 | 1820333 | cytochrome b-245, beta polypeptide                       | Cybb    | 66021  | 1,10 | down |
| 5814856 | 7240420 | 1475079 | cytochrome c, testis                                     | Cyct    | 25310  | 1,05 | up   |
| 6410356 | 7240420 | 1475080 | cytochrome c, testis                                     | Cyct    | 25310  | 1,04 | down |
| 5660256 | 7029939 | 960507  | cytochrome P450 monooxygenase CYP2T1                     | Cyp2t1  | 171380 | 1,02 | up   |
| 5803738 | 7029939 | 960503  | cytochrome P450 monooxygenase CYP2T1                     | Cyp2t1  | 171380 | 1,08 | down |
| 5986663 | 7029939 | 960506  | cytochrome P450 monooxygenase CYP2T1                     | Cyp2t1  | 171380 | 1,73 | down |
| 6026244 | 7029939 | 960504  | cytochrome P450 monooxygenase CYP2T1                     | Cyp2t1  | 171380 | 1,12 | up   |
| 6121256 | 7029939 | 960511  | cytochrome P450 monooxygenase CYP2T1                     | Cyp2t1  | 171380 | 1,59 | up   |
| 6124812 | 7029939 | 960508  | cytochrome P450 monooxygenase CYP2T1                     | Cyp2t1  | 171380 | 1,34 | up   |
| 6171949 | 7029939 | 960509  | cytochrome P450 monooxygenase CYP2T1                     | Cyp2t1  | 171380 | 1,60 | up   |
| 6564107 | 7029939 | 960508  | cytochrome P450 monooxygenase CYP2T1                     | Cyp2t1  | 171380 | 1,80 | up   |
| 6596220 | 7029939 | 960510  | cytochrome P450 monooxygenase CYP2T1                     | Cyp2t1  | 171380 | 1,51 | up   |
| 6677475 | 7029939 | 960505  | cytochrome P450 monooxygenase CYP2T1                     | Cyp2t1  | 171380 | 1,74 | down |
| 6707309 | 7029939 | 960502  | cytochrome P450 monooxygenase CYP2T1                     | Cyp2t1  | 171380 | 2,04 | down |
| 5662417 | 7345842 | 1734723 | cytochrome P450, family 19, subfamily a, polypeptide 1   | Cyp19a1 | 25147  | 1,38 | up   |
| 5701575 | 7345842 | 1734724 | cytochrome P450, family 19, subfamily a, polypeptide 1   | Cyp19a1 | 25147  | 1,27 | down |
| 6175668 | 7345842 | 1734722 | cytochrome P450, family 19, subfamily a, polypeptide 1   | Cyp19a1 | 25147  | 1,05 | up   |
| 6200093 | 7345842 | 1734725 | cytochrome P450, family 19, subfamily a, polypeptide 1   | Cyp19a1 | 25147  | 1,22 | down |
| 6460688 | 7345842 | 1734728 | cytochrome P450, family 19, subfamily a, polypeptide 1   | Cyp19a1 | 25147  | 1,02 | up   |
| 6557966 | 7345842 | 1734727 | cytochrome P450, family 19, subfamily a, polypeptide 1   | Cyp19a1 | 25147  | 1,42 | down |

|         |         |         |                                                                                  |                   |                   |      |      |
|---------|---------|---------|----------------------------------------------------------------------------------|-------------------|-------------------|------|------|
| 6645893 | 7345842 | 1734729 | cytochrome P450, family 19, subfamily a, polypeptide 1                           | Cyp19a1           | 25147             | 2,90 | down |
| 6674454 | 7345842 | 1734721 | cytochrome P450, family 19, subfamily a, polypeptide 1                           | Cyp19a1           | 25147             | 1,04 | up   |
| 6701923 | 7345842 | 1734726 | cytochrome P450, family 19, subfamily a, polypeptide 1                           | Cyp19a1           | 25147             | 1,07 | up   |
| 5944103 | 7330159 | 1695626 | cytochrome P450, family 2, subfamily d, polypeptide 1                            | Cyp2d1            | 266684            | 1,27 | up   |
| 6203399 | 7330159 | 1695634 | cytochrome P450, family 2, subfamily d, polypeptide 1                            | Cyp2d1            | 266684            | 1,02 | down |
| 6440832 | 7330159 | 1695634 | cytochrome P450, family 2, subfamily d, polypeptide 1                            | Cyp2d1            | 266684            | 2,71 | up   |
| 6620012 | 7330159 | 1695630 | cytochrome P450, family 2, subfamily d, polypeptide 1                            | Cyp2d1            | 266684            | 1,60 | down |
| 5626079 | 7330159 | 1695629 | cytochrome P450, family 2, subfamily d, polypeptide 1 /// cytochrome P450, famil | Cyp2d1 /// Cyp2d5 | 266684 /// 286963 | 1,25 | down |
| 5767733 | 7330159 | 1695628 | cytochrome P450, family 2, subfamily d, polypeptide 1 /// cytochrome P450, famil | Cyp2d1 /// Cyp2d5 | 266684 /// 286963 | 1,10 | up   |
| 6018611 | 7330159 | 1695631 | cytochrome P450, family 2, subfamily d, polypeptide 1 /// cytochrome P450, famil | Cyp2d1 /// Cyp2d5 | 266684 /// 286963 | 1,34 | down |
| 6018939 | 7330159 | 1695627 | cytochrome P450, family 2, subfamily d, polypeptide 1 /// cytochrome P450, famil | Cyp2d1 /// Cyp2d5 | 266684 /// 286963 | 1,11 | up   |
| 6162484 | 7330159 | 1695632 | cytochrome P450, family 2, subfamily d, polypeptide 1 /// cytochrome P450, famil | Cyp2d1 /// Cyp2d5 | 266684 /// 286963 | 1,31 | down |
| 6219953 | 7330159 | 1695625 | cytochrome P450, family 2, subfamily d, polypeptide 1 /// cytochrome P450, famil | Cyp2d1 /// Cyp2d5 | 266684 /// 286963 | 1,35 | up   |
| 6689056 | 7330159 | 1695633 | cytochrome P450, family 2, subfamily d, polypeptide 1 /// cytochrome P450, famil | Cyp2d1 /// Cyp2d5 | 266684 /// 286963 | 1,11 | up   |
| 5895638 | 7356120 | 1760147 | cytochrome P450, family 27, subfamily a, polypeptide 1                           | Cyp27a1           | 301517            | 1,15 | down |
| 6143513 | 7356120 | 1760145 | cytochrome P450, family 27, subfamily a, polypeptide 1                           | Cyp27a1           | 301517            | 1,31 | down |
| 6188414 | 7356120 | 1760149 | cytochrome P450, family 27, subfamily a, polypeptide 1                           | Cyp27a1           | 301517            | 1,65 | up   |
| 6191975 | 7356120 | 1760152 | cytochrome P450, family 27, subfamily a, polypeptide 1                           | Cyp27a1           | 301517            | 4,67 | up   |
| 6192836 | 7356120 | 1760144 | cytochrome P450, family 27, subfamily a, polypeptide 1                           | Cyp27a1           | 301517            | 1,21 | up   |
| 6204207 | 7356120 | 1760152 | cytochrome P450, family 27, subfamily a, polypeptide 1                           | Cyp27a1           | 301517            | 2,23 | down |
| 6302254 | 7356120 | 1760143 | cytochrome P450, family 27, subfamily a, polypeptide 1                           | Cyp27a1           | 301517            | 1,03 | up   |
| 6315010 | 7356120 | 1760148 | cytochrome P450, family 27, subfamily a, polypeptide 1                           | Cyp27a1           | 301517            | 1,22 | up   |
| 6342218 | 7356120 | 1760146 | cytochrome P450, family 27, subfamily a, polypeptide 1                           | Cyp27a1           | 301517            | 1,28 | up   |
| 6414633 | 7356120 | 1760142 | cytochrome P450, family 27, subfamily a, polypeptide 1                           | Cyp27a1           | 301517            | 1,15 | up   |
| 6497963 | 7356120 | 1760151 | cytochrome P450, family 27, subfamily a, polypeptide 1                           | Cyp27a1           | 301517            | 1,34 | down |
| 6604733 | 7356120 | 1760143 | cytochrome P450, family 27, subfamily a, polypeptide 1                           | Cyp27a1           | 301517            | 2,85 | down |
| 6607733 | 7356120 | 1760150 | cytochrome P450, family 27, subfamily a, polypeptide 1                           | Cyp27a1           | 301517            | 1,34 | down |
| 6735539 | 7356120 | 1760151 | cytochrome P450, family 27, subfamily a, polypeptide 1                           | Cyp27a1           | 301517            | 1,20 | down |
| 5631515 | 7290141 | 1597026 | cytochrome P450, family 4, subfamily a, polypeptide 2 /// cytochrome P450, famil | Cyp4a2 /// Cyp4a3 | 24306 /// 298423  | 1,68 | down |
| 5844408 | 7290141 | 1597026 | cytochrome P450, family 4, subfamily a, polypeptide 2 /// cytochrome P450, famil | Cyp4a2 /// Cyp4a3 | 24306 /// 298423  | 1,10 | down |
| 6071842 | 7290141 | 1597027 | cytochrome P450, family 4, subfamily a, polypeptide 2 /// cytochrome P450, famil | Cyp4a2 /// Cyp4a3 | 24306 /// 298423  | 1,31 | down |
| 6215468 | 7290141 | 1597029 | cytochrome P450, family 4, subfamily a, polypeptide 2 /// cytochrome P450, famil | Cyp4a2 /// Cyp4a3 | 24306 /// 298423  | 1,03 | up   |
| 6336904 | 7290141 | 1597022 | cytochrome P450, family 4, subfamily a, polypeptide 2 /// cytochrome P450, famil | Cyp4a2 /// Cyp4a3 | 24306 /// 298423  | 1,04 | down |
| 6617059 | 7290141 | 1597023 | cytochrome P450, family 4, subfamily a, polypeptide 2 /// cytochrome P450, famil | Cyp4a2 /// Cyp4a3 | 24306 /// 298423  | 2,06 | up   |
| 5763176 | 7290141 | 1597021 | cytochrome P450, family 4, subfamily a, polypeptide 3                            | Cyp4a3            | 298423            | 1,16 | up   |
| 5941625 | 7290141 | 1597030 | cytochrome P450, family 4, subfamily a, polypeptide 3                            | Cyp4a3            | 298423            | 1,28 | up   |
| 6100616 | 7290141 | 1597032 | cytochrome P450, family 4, subfamily a, polypeptide 3                            | Cyp4a3            | 298423            | 2,34 | down |
| 6207365 | 7290141 | 1597031 | cytochrome P450, family 4, subfamily a, polypeptide 3                            | Cyp4a3            | 298423            | 1,18 | up   |
| 6547131 | 7290141 | 1597028 | cytochrome P450, family 4, subfamily a, polypeptide 3                            | Cyp4a3            | 298423            | 1,03 | down |
| 6665063 | 7290141 | 1597024 | cytochrome P450, family 4, subfamily a, polypeptide 3                            | Cyp4a3            | 298423            | 1,08 | up   |
| 6707668 | 7290141 | 1597025 | cytochrome P450, family 4, subfamily a, polypeptide 3                            | Cyp4a3            | 298423            | 1,61 | up   |
| 5647383 | 7143971 | 1235926 | cytochrome P450, family 4, subfamily f, polypeptide 18                           | Cyp4f18           | 290623            | 1,10 | down |
| 5696530 | 7143971 | 1235935 | cytochrome P450, family 4, subfamily f, polypeptide 18                           | Cyp4f18           | 290623            | 1,06 | up   |
| 5697801 | 7143971 | 1235923 | cytochrome P450, family 4, subfamily f, polypeptide 18                           | Cyp4f18           | 290623            | 1,63 | down |
| 5701902 | 7143971 | 1235921 | cytochrome P450, family 4, subfamily f, polypeptide 18                           | Cyp4f18           | 290623            | 1,20 | up   |
| 5736198 | 7143971 | 1235935 | cytochrome P450, family 4, subfamily f, polypeptide 18                           | Cyp4f18           | 290623            | 1,00 | up   |
| 5816637 | 7143971 | 1235925 | cytochrome P450, family 4, subfamily f, polypeptide 18                           | Cyp4f18           | 290623            | 1,13 | up   |
| 5869564 | 7143971 | 1235926 | cytochrome P450, family 4, subfamily f, polypeptide 18                           | Cyp4f18           | 290623            | 1,06 | up   |
| 6149212 | 7143971 | 1235928 | cytochrome P450, family 4, subfamily f, polypeptide 18                           | Cyp4f18           | 290623            | 1,48 | up   |
| 6188893 | 7143971 | 1235930 | cytochrome P450, family 4, subfamily f, polypeptide 18                           | Cyp4f18           | 290623            | 1,00 | up   |
| 6220291 | 7143971 | 1235934 | cytochrome P450, family 4, subfamily f, polypeptide 18                           | Cyp4f18           | 290623            | 1,95 | down |
| 6244144 | 7143971 | 1235924 | cytochrome P450, family 4, subfamily f, polypeptide 18                           | Cyp4f18           | 290623            | 1,00 | up   |
| 6296836 | 7143971 | 1235935 | cytochrome P450, family 4, subfamily f, polypeptide 18                           | Cyp4f18           | 290623            | 1,11 | down |
| 6413386 | 7143971 | 1235931 | cytochrome P450, family 4, subfamily f, polypeptide 18                           | Cyp4f18           | 290623            | 1,16 | down |
| 6454216 | 7143971 | 1235929 | cytochrome P450, family 4, subfamily f, polypeptide 18                           | Cyp4f18           | 290623            | 1,03 | down |
| 6564916 | 7143971 | 1235933 | cytochrome P450, family 4, subfamily f, polypeptide 18                           | Cyp4f18           | 290623            | 1,03 | down |

|         |         |         |                                                                                      |                                                  |        |      |      |
|---------|---------|---------|--------------------------------------------------------------------------------------|--------------------------------------------------|--------|------|------|
| 5621480 | 7301616 | 1625889 | cytochrome P450, family 46, subfamily a, polypeptide 1                               | Cyp46a1                                          | 362782 | 1,44 | up   |
| 5668313 | 7301616 | 1625901 | cytochrome P450, family 46, subfamily a, polypeptide 1                               | Cyp46a1                                          | 362782 | 1,07 | down |
| 5714939 | 7301616 | 1625896 | cytochrome P450, family 46, subfamily a, polypeptide 1                               | Cyp46a1                                          | 362782 | 1,43 | up   |
| 5732111 | 7301616 | 1625904 | cytochrome P450, family 46, subfamily a, polypeptide 1                               | Cyp46a1                                          | 362782 | 1,19 | up   |
| 5820195 | 7301616 | 1625905 | cytochrome P450, family 46, subfamily a, polypeptide 1                               | Cyp46a1                                          | 362782 | 1,01 | down |
| 5861210 | 7301616 | 1625912 | cytochrome P450, family 46, subfamily a, polypeptide 1                               | Cyp46a1                                          | 362782 | 1,15 | down |
| 5868073 | 7301616 | 1625897 | cytochrome P450, family 46, subfamily a, polypeptide 1                               | Cyp46a1                                          | 362782 | 1,15 | down |
| 5897593 | 7301616 | 1625910 | cytochrome P450, family 46, subfamily a, polypeptide 1                               | Cyp46a1                                          | 362782 | 1,03 | up   |
| 5963567 | 7301616 | 1625893 | cytochrome P450, family 46, subfamily a, polypeptide 1                               | Cyp46a1                                          | 362782 | 1,22 | up   |
| 6000918 | 7301616 | 1625911 | cytochrome P450, family 46, subfamily a, polypeptide 1                               | Cyp46a1                                          | 362782 | 1,65 | down |
| 6023254 | 7301616 | 1625908 | cytochrome P450, family 46, subfamily a, polypeptide 1                               | Cyp46a1                                          | 362782 | 1,27 | up   |
| 6032931 | 7301616 | 1625908 | cytochrome P450, family 46, subfamily a, polypeptide 1                               | Cyp46a1                                          | 362782 | 2,45 | down |
| 6122953 | 7301616 | 1625909 | cytochrome P450, family 46, subfamily a, polypeptide 1                               | Cyp46a1                                          | 362782 | 1,76 | down |
| 6155274 | 7301616 | 1625907 | cytochrome P450, family 46, subfamily a, polypeptide 1                               | Cyp46a1                                          | 362782 | 1,29 | down |
| 6216851 | 7301616 | 1625892 | cytochrome P450, family 46, subfamily a, polypeptide 1                               | Cyp46a1                                          | 362782 | 1,24 | up   |
| 6439130 | 7301616 | 1625906 | cytochrome P450, family 46, subfamily a, polypeptide 1                               | Cyp46a1                                          | 362782 | 1,04 | down |
| 6562086 | 7301616 | 1625902 | cytochrome P450, family 46, subfamily a, polypeptide 1                               | Cyp46a1                                          | 362782 | 1,13 | down |
| 5680729 | 7328956 | 1693101 | cytochrome P450, subfamily 11B, polypeptide 2                                        | Cyp11b2                                          | 24294  | 1,14 | up   |
| 5776200 | 7328956 | 1693096 | cytochrome P450, subfamily 11B, polypeptide 2                                        | Cyp11b2                                          | 24294  | 2,55 | up   |
| 5835394 | 7328956 | 1693094 | cytochrome P450, subfamily 11B, polypeptide 2                                        | Cyp11b2                                          | 24294  | 1,05 | up   |
| 6019303 | 7328956 | 1693095 | cytochrome P450, subfamily 11B, polypeptide 2                                        | Cyp11b2                                          | 24294  | 1,11 | up   |
| 6053969 | 7328956 | 1693098 | cytochrome P450, subfamily 11B, polypeptide 2                                        | Cyp11b2                                          | 24294  | 1,16 | down |
| 6165271 | 7328956 | 1693099 | cytochrome P450, subfamily 11B, polypeptide 2                                        | Cyp11b2                                          | 24294  | 1,17 | down |
| 6224116 | 7328956 | 1693100 | cytochrome P450, subfamily 11B, polypeptide 2                                        | Cyp11b2                                          | 24294  | 1,10 | down |
| 6314175 | 7328956 | 1693097 | cytochrome P450, subfamily 11B, polypeptide 2                                        | Cyp11b2                                          | 24294  | 1,38 | up   |
| 5994238 | 7328956 | 1693103 | cytochrome P450, subfamily 11B, polypeptide 2 /// cytochrome P450, subfamily 1b2 /// | Cyp11b1 /// C <sub>γ</sub> 94 /// 500892 /// 353 |        | 1,25 | down |
| 6474670 | 7328956 | 1693102 | cytochrome P450, subfamily 11B, polypeptide 2 /// cytochrome P450, subfamily 1b2 /// | Cyp11b1 /// C <sub>γ</sub> 94 /// 500892 /// 353 |        | 1,08 | down |
| 5625324 | 7248318 | 1493342 | cytochrome P450, subfamily 24                                                        | Cyp24a1                                          | 25279  | 1,19 | up   |
| 5629569 | 7248318 | 1493342 | cytochrome P450, subfamily 24                                                        | Cyp24a1                                          | 25279  | 1,09 | down |
| 5645250 | 7248318 | 1493336 | cytochrome P450, subfamily 24                                                        | Cyp24a1                                          | 25279  | 1,28 | up   |
| 5755502 | 7248318 | 1493338 | cytochrome P450, subfamily 24                                                        | Cyp24a1                                          | 25279  | 1,11 | up   |
| 5929851 | 7248318 | 1493341 | cytochrome P450, subfamily 24                                                        | Cyp24a1                                          | 25279  | 1,01 | up   |
| 6062584 | 7248318 | 1493337 | cytochrome P450, subfamily 24                                                        | Cyp24a1                                          | 25279  | 1,18 | down |
| 6180711 | 7248318 | 1493331 | cytochrome P450, subfamily 24                                                        | Cyp24a1                                          | 25279  | 1,43 | up   |
| 6191258 | 7248318 | 1493335 | cytochrome P450, subfamily 24                                                        | Cyp24a1                                          | 25279  | 1,00 | down |
| 6248947 | 7248318 | 1493340 | cytochrome P450, subfamily 24                                                        | Cyp24a1                                          | 25279  | 2,22 | down |
| 6341315 | 7248318 | 1493333 | cytochrome P450, subfamily 24                                                        | Cyp24a1                                          | 25279  | 1,03 | down |
| 6444433 | 7248318 | 1493342 | cytochrome P450, subfamily 24                                                        | Cyp24a1                                          | 25279  | 1,10 | down |
| 6518432 | 7248318 | 1493342 | cytochrome P450, subfamily 24                                                        | Cyp24a1                                          | 25279  | 1,39 | down |
| 6581650 | 7248318 | 1493332 | cytochrome P450, subfamily 24                                                        | Cyp24a1                                          | 25279  | 1,46 | down |
| 6616472 | 7248318 | 1493342 | cytochrome P450, subfamily 24                                                        | Cyp24a1                                          | 25279  | 1,28 | down |
| 6664309 | 7248318 | 1493339 | cytochrome P450, subfamily 24                                                        | Cyp24a1                                          | 25279  | 1,20 | down |
| 6670902 | 7248318 | 1493332 | cytochrome P450, subfamily 24                                                        | Cyp24a1                                          | 25279  | 1,05 | down |
| 6695570 | 7248318 | 1493334 | cytochrome P450, subfamily 24                                                        | Cyp24a1                                          | 25279  | 1,12 | down |
| 5672622 | 7100386 | 1128531 | cytohesin 3                                                                          | Cyth3                                            | 116693 | 1,12 | up   |
| 5885708 | 7100386 | 1128533 | cytohesin 3                                                                          | Cyth3                                            | 116693 | 1,34 | up   |
| 5940424 | 7100386 | 1128535 | cytohesin 3                                                                          | Cyth3                                            | 116693 | 1,06 | up   |
| 5957377 | 7100386 | 1128541 | cytohesin 3                                                                          | Cyth3                                            | 116693 | 1,06 | up   |
| 5966977 | 7100386 | 1128537 | cytohesin 3                                                                          | Cyth3                                            | 116693 | 1,15 | up   |
| 5977139 | 7100386 | 1128538 | cytohesin 3                                                                          | Cyth3                                            | 116693 | 1,13 | up   |
| 6103675 | 7100386 | 1128534 | cytohesin 3                                                                          | Cyth3                                            | 116693 | 1,30 | up   |
| 6278632 | 7100386 | 1128536 | cytohesin 3                                                                          | Cyth3                                            | 116693 | 1,37 | down |
| 6322270 | 7100386 | 1128539 | cytohesin 3                                                                          | Cyth3                                            | 116693 | 1,01 | up   |
| 6548766 | 7100386 | 1128530 | cytohesin 3                                                                          | Cyth3                                            | 116693 | 2,33 | down |
| 6569173 | 7100386 | 1128540 | cytohesin 3                                                                          | Cyth3                                            | 116693 | 1,06 | down |
| 6745393 | 7100386 | 1128532 | cytohesin 3                                                                          | Cyth3                                            | 116693 | 1,10 | down |

|         |         |         |                                           |        |        |      |      |
|---------|---------|---------|-------------------------------------------|--------|--------|------|------|
| 5663085 | 7340125 | 1720451 | cytokine inducible SH2-containing protein | Cish   | 83681  | 2,14 | down |
| 5757034 | 7340125 | 1720447 | cytokine inducible SH2-containing protein | Cish   | 83681  | 1,02 | down |
| 6144737 | 7340125 | 1720451 | cytokine inducible SH2-containing protein | Cish   | 83681  | 1,07 | up   |
| 6692337 | 7340125 | 1720450 | cytokine inducible SH2-containing protein | Cish   | 83681  | 1,49 | up   |
| 5677693 | 7032083 | 965686  | cytoplasmic FMR1 interacting protein 1    | Cyfp1  | 308666 | 1,13 | up   |
| 5710039 | 7032083 | 965672  | cytoplasmic FMR1 interacting protein 1    | Cyfp1  | 308666 | 1,37 | down |
| 5777307 | 7032083 | 965690  | cytoplasmic FMR1 interacting protein 1    | Cyfp1  | 308666 | 1,21 | up   |
| 5804582 | 7032083 | 965680  | cytoplasmic FMR1 interacting protein 1    | Cyfp1  | 308666 | 1,06 | up   |
| 5824633 | 7032083 | 965678  | cytoplasmic FMR1 interacting protein 1    | Cyfp1  | 308666 | 1,06 | up   |
| 5828467 | 7032083 | 965693  | cytoplasmic FMR1 interacting protein 1    | Cyfp1  | 308666 | 1,09 | up   |
| 5916397 | 7032083 | 965682  | cytoplasmic FMR1 interacting protein 1    | Cyfp1  | 308666 | 1,07 | up   |
| 5929216 | 7032083 | 965682  | cytoplasmic FMR1 interacting protein 1    | Cyfp1  | 308666 | 1,19 | down |
| 5932394 | 7032083 | 965682  | cytoplasmic FMR1 interacting protein 1    | Cyfp1  | 308666 | 1,03 | up   |
| 5963513 | 7032083 | 965670  | cytoplasmic FMR1 interacting protein 1    | Cyfp1  | 308666 | 1,28 | down |
| 5966644 | 7032083 | 965683  | cytoplasmic FMR1 interacting protein 1    | Cyfp1  | 308666 | 1,50 | down |
| 5973864 | 7032083 | 965697  | cytoplasmic FMR1 interacting protein 1    | Cyfp1  | 308666 | 1,17 | up   |
| 6006550 | 7032083 | 965664  | cytoplasmic FMR1 interacting protein 1    | Cyfp1  | 308666 | 1,29 | down |
| 6039126 | 7032083 | 965680  | cytoplasmic FMR1 interacting protein 1    | Cyfp1  | 308666 | 1,14 | down |
| 6087232 | 7032083 | 965682  | cytoplasmic FMR1 interacting protein 1    | Cyfp1  | 308666 | 1,54 | down |
| 6132292 | 7032083 | 965668  | cytoplasmic FMR1 interacting protein 1    | Cyfp1  | 308666 | 1,20 | up   |
| 6185959 | 7032083 | 965675  | cytoplasmic FMR1 interacting protein 1    | Cyfp1  | 308666 | 1,08 | down |
| 6196447 | 7032083 | 965694  | cytoplasmic FMR1 interacting protein 1    | Cyfp1  | 308666 | 1,00 | down |
| 6279153 | 7032083 | 965692  | cytoplasmic FMR1 interacting protein 1    | Cyfp1  | 308666 | 1,15 | down |
| 6280188 | 7032083 | 965663  | cytoplasmic FMR1 interacting protein 1    | Cyfp1  | 308666 | 1,25 | up   |
| 6347171 | 7032083 | 965697  | cytoplasmic FMR1 interacting protein 1    | Cyfp1  | 308666 | 1,46 | down |
| 6348078 | 7032083 | 965689  | cytoplasmic FMR1 interacting protein 1    | Cyfp1  | 308666 | 1,01 | up   |
| 6356528 | 7032083 | 965684  | cytoplasmic FMR1 interacting protein 1    | Cyfp1  | 308666 | 1,24 | up   |
| 6400727 | 7032083 | 965681  | cytoplasmic FMR1 interacting protein 1    | Cyfp1  | 308666 | 2,47 | down |
| 6404116 | 7032083 | 965666  | cytoplasmic FMR1 interacting protein 1    | Cyfp1  | 308666 | 1,08 | up   |
| 6415319 | 7032083 | 965691  | cytoplasmic FMR1 interacting protein 1    | Cyfp1  | 308666 | 1,11 | up   |
| 6443652 | 7032083 | 965681  | cytoplasmic FMR1 interacting protein 1    | Cyfp1  | 308666 | 1,35 | down |
| 6460814 | 7032083 | 965679  | cytoplasmic FMR1 interacting protein 1    | Cyfp1  | 308666 | 1,16 | down |
| 6473999 | 7032083 | 965674  | cytoplasmic FMR1 interacting protein 1    | Cyfp1  | 308666 | 1,14 | up   |
| 6533321 | 7032083 | 965685  | cytoplasmic FMR1 interacting protein 1    | Cyfp1  | 308666 | 1,09 | up   |
| 6541782 | 7032083 | 965669  | cytoplasmic FMR1 interacting protein 1    | Cyfp1  | 308666 | 1,05 | down |
| 6548351 | 7032083 | 965652  | cytoplasmic FMR1 interacting protein 1    | Cyfp1  | 308666 | 1,18 | down |
| 6557828 | 7032083 | 965674  | cytoplasmic FMR1 interacting protein 1    | Cyfp1  | 308666 | 1,10 | down |
| 6568348 | 7032083 | 965684  | cytoplasmic FMR1 interacting protein 1    | Cyfp1  | 308666 | 1,02 | down |
| 6580038 | 7032083 | 965687  | cytoplasmic FMR1 interacting protein 1    | Cyfp1  | 308666 | 1,06 | down |
| 6719306 | 7032083 | 965667  | cytoplasmic FMR1 interacting protein 1    | Cyfp1  | 308666 | 1,18 | down |
| 6735844 | 7032083 | 965696  | cytoplasmic FMR1 interacting protein 1    | Cyfp1  | 308666 | 1,02 | down |
| 6738444 | 7032083 | 965695  | cytoplasmic FMR1 interacting protein 1    | Cyfp1  | 308666 | 1,19 | down |
| 5636305 | 7340977 | 1722466 | cytoplasmic linker associated protein 2   | Clasp2 | 114514 | 1,06 | up   |
| 5651856 | 7340977 | 1722463 | cytoplasmic linker associated protein 2   | Clasp2 | 114514 | 1,33 | up   |
| 5657077 | 7340977 | 1722475 | cytoplasmic linker associated protein 2   | Clasp2 | 114514 | 1,19 | down |
| 5679860 | 7340977 | 1722483 | cytoplasmic linker associated protein 2   | Clasp2 | 114514 | 1,09 | up   |
| 5714176 | 7340977 | 1722486 | cytoplasmic linker associated protein 2   | Clasp2 | 114514 | 1,08 | up   |
| 5755088 | 7340977 | 1722482 | cytoplasmic linker associated protein 2   | Clasp2 | 114514 | 1,15 | up   |
| 5771283 | 7340977 | 1722485 | cytoplasmic linker associated protein 2   | Clasp2 | 114514 | 1,09 | down |
| 5797701 | 7340977 | 1722480 | cytoplasmic linker associated protein 2   | Clasp2 | 114514 | 1,02 | down |
| 5840915 | 7340977 | 1722468 | cytoplasmic linker associated protein 2   | Clasp2 | 114514 | 1,48 | up   |
| 5891111 | 7340977 | 1722487 | cytoplasmic linker associated protein 2   | Clasp2 | 114514 | 1,03 | down |
| 5910027 | 7340977 | 1722481 | cytoplasmic linker associated protein 2   | Clasp2 | 114514 | 1,09 | down |
| 6009883 | 7340977 | 1722472 | cytoplasmic linker associated protein 2   | Clasp2 | 114514 | 1,05 | down |
| 6037645 | 7340977 | 1722484 | cytoplasmic linker associated protein 2   | Clasp2 | 114514 | 1,01 | up   |
| 6114470 | 7340977 | 1722474 | cytoplasmic linker associated protein 2   | Clasp2 | 114514 | 1,28 | down |

|         |         |         |                                                       |           |        |      |      |
|---------|---------|---------|-------------------------------------------------------|-----------|--------|------|------|
| 6124129 | 7340977 | 1722476 | cytoplasmic linker associated protein 2               | Clasp2    | 114514 | 1,09 | down |
| 6136728 | 7340977 | 1722458 | cytoplasmic linker associated protein 2               | Clasp2    | 114514 | 1,16 | up   |
| 6140511 | 7340977 | 1722476 | cytoplasmic linker associated protein 2               | Clasp2    | 114514 | 1,29 | down |
| 6140983 | 7340977 | 1722457 | cytoplasmic linker associated protein 2               | Clasp2    | 114514 | 2,93 | up   |
| 6162013 | 7340977 | 1722471 | cytoplasmic linker associated protein 2               | Clasp2    | 114514 | 1,22 | down |
| 6218474 | 7340977 | 1722461 | cytoplasmic linker associated protein 2               | Clasp2    | 114514 | 1,12 | up   |
| 6315291 | 7340977 | 1722467 | cytoplasmic linker associated protein 2               | Clasp2    | 114514 | 1,29 | up   |
| 6321871 | 7340977 | 1722461 | cytoplasmic linker associated protein 2               | Clasp2    | 114514 | 1,11 | down |
| 6341214 | 7340977 | 1722473 | cytoplasmic linker associated protein 2               | Clasp2    | 114514 | 1,39 | down |
| 6398083 | 7340977 | 1722479 | cytoplasmic linker associated protein 2               | Clasp2    | 114514 | 1,16 | up   |
| 6471215 | 7340977 | 1722465 | cytoplasmic linker associated protein 2               | Clasp2    | 114514 | 1,12 | down |
| 6472100 | 7340977 | 1722460 | cytoplasmic linker associated protein 2               | Clasp2    | 114514 | 1,20 | down |
| 6486954 | 7340977 | 1722469 | cytoplasmic linker associated protein 2               | Clasp2    | 114514 | 1,04 | up   |
| 6496798 | 7340977 | 1722462 | cytoplasmic linker associated protein 2               | Clasp2    | 114514 | 1,20 | up   |
| 6516130 | 7340977 | 1722478 | cytoplasmic linker associated protein 2               | Clasp2    | 114514 | 1,00 | down |
| 6550635 | 7340977 | 1722464 | cytoplasmic linker associated protein 2               | Clasp2    | 114514 | 1,03 | down |
| 6572566 | 7340977 | 1722470 | cytoplasmic linker associated protein 2               | Clasp2    | 114514 | 1,05 | up   |
| 6584312 | 7340977 | 1722459 | cytoplasmic linker associated protein 2               | Clasp2    | 114514 | 1,83 | down |
| 6601696 | 7340977 | 1722477 | cytoplasmic linker associated protein 2               | Clasp2    | 114514 | 1,23 | down |
| 5730927 | 7062173 | 1036977 | cytoplasmic polyadenylation element binding protein 3 | Cpeb3     | 309510 | 1,25 | down |
| 6472340 | 7062173 | 1037017 | cytoplasmic polyadenylation element binding protein 3 | Cpeb3     | 309510 | 1,11 | up   |
| 5781591 | 7376566 | 1812886 | dachshund homolog 2 (Drosophila)                      | Dach2     | 302333 | 1,05 | up   |
| 6687420 | 7376566 | 1812848 | dachshund homolog 2 (Drosophila)                      | Dach2     | 302333 | 1,04 | down |
| 5725340 | 7142081 | 1230949 | DAZ interacting protein 1                             | Dzip1     | 364475 | 1,51 | down |
| 5799164 | 7142081 | 1230952 | DAZ interacting protein 1                             | Dzip1     | 364475 | 1,08 | down |
| 5928229 | 7142081 | 1230957 | DAZ interacting protein 1                             | Dzip1     | 364475 | 1,17 | down |
| 6002327 | 7142081 | 1230985 | DAZ interacting protein 1                             | Dzip1     | 364475 | 1,01 | up   |
| 6154061 | 7142081 | 1230964 | DAZ interacting protein 1                             | Dzip1     | 364475 | 1,12 | down |
| 6328658 | 7142081 | 1230955 | DAZ interacting protein 1                             | Dzip1     | 364475 | 1,03 | up   |
| 6474077 | 7142081 | 1230949 | DAZ interacting protein 1                             | Dzip1     | 364475 | 1,21 | up   |
| 6540179 | 7142081 | 1230965 | DAZ interacting protein 1                             | Dzip1     | 364475 | 1,00 | down |
| 5824701 | 7124223 | 1187524 | DAZ interacting protein 1, pseudogene 1               | Dzip1-ps1 | 364128 | 2,19 | up   |
| 5984570 | 7124223 | 1187524 | DAZ interacting protein 1, pseudogene 1               | Dzip1-ps1 | 364128 | 1,84 | down |
| 6031464 | 7124223 | 1187524 | DAZ interacting protein 1, pseudogene 1               | Dzip1-ps1 | 364128 | 1,01 | up   |
| 6240781 | 7124223 | 1187524 | DAZ interacting protein 1, pseudogene 1               | Dzip1-ps1 | 364128 | 1,53 | up   |
| 6384835 | 7124223 | 1187524 | DAZ interacting protein 1, pseudogene 1               | Dzip1-ps1 | 364128 | 1,20 | down |
| 6450973 | 7124223 | 1187524 | DAZ interacting protein 1, pseudogene 1               | Dzip1-ps1 | 364128 | 1,10 | down |
| 5707730 | 7339650 | 1719047 | DAZ interacting protein 1-like                        | Dzip1l    | 315952 | 1,04 | up   |
| 5785827 | 7339650 | 1719039 | DAZ interacting protein 1-like                        | Dzip1l    | 315952 | 1,12 | up   |
| 5947298 | 7339650 | 1719041 | DAZ interacting protein 1-like                        | Dzip1l    | 315952 | 2,12 | up   |
| 6027066 | 7339650 | 1719053 | DAZ interacting protein 1-like                        | Dzip1l    | 315952 | 1,04 | down |
| 6104738 | 7339650 | 1719051 | DAZ interacting protein 1-like                        | Dzip1l    | 315952 | 1,63 | up   |
| 6189146 | 7339650 | 1719048 | DAZ interacting protein 1-like                        | Dzip1l    | 315952 | 1,32 | down |
| 6245342 | 7339650 | 1719049 | DAZ interacting protein 1-like                        | Dzip1l    | 315952 | 1,40 | down |
| 6260612 | 7339650 | 1719038 | DAZ interacting protein 1-like                        | Dzip1l    | 315952 | 1,45 | up   |
| 6333348 | 7339650 | 1719046 | DAZ interacting protein 1-like                        | Dzip1l    | 315952 | 1,38 | up   |
| 6348536 | 7339650 | 1719040 | DAZ interacting protein 1-like                        | Dzip1l    | 315952 | 1,15 | up   |
| 6392492 | 7339650 | 1719049 | DAZ interacting protein 1-like                        | Dzip1l    | 315952 | 1,21 | down |
| 6423664 | 7339650 | 1719050 | DAZ interacting protein 1-like                        | Dzip1l    | 315952 | 1,10 | up   |
| 6425564 | 7339650 | 1719042 | DAZ interacting protein 1-like                        | Dzip1l    | 315952 | 1,43 | down |
| 6428849 | 7339650 | 1719050 | DAZ interacting protein 1-like                        | Dzip1l    | 315952 | 1,26 | up   |
| 6454522 | 7339650 | 1719044 | DAZ interacting protein 1-like                        | Dzip1l    | 315952 | 1,21 | down |
| 6484824 | 7339650 | 1719038 | DAZ interacting protein 1-like                        | Dzip1l    | 315952 | 1,37 | up   |
| 6517573 | 7339650 | 1719052 | DAZ interacting protein 1-like                        | Dzip1l    | 315952 | 1,91 | down |
| 6586441 | 7339650 | 1719050 | DAZ interacting protein 1-like                        | Dzip1l    | 315952 | 1,58 | down |
| 6639229 | 7339650 | 1719045 | DAZ interacting protein 1-like                        | Dzip1l    | 315952 | 1,49 | down |

|         |         |         |                                           |        |        |      |      |
|---------|---------|---------|-------------------------------------------|--------|--------|------|------|
| 6744610 | 7339650 | 1719043 | DAZ interacting protein 1-like            | Dzip11 | 315952 | 1,61 | down |
| 5793297 | 7221817 | 1427153 | D-dopachrome tautomerase                  | Ddt    | 29318  | 1,16 | up   |
| 6108480 | 7221817 | 1427151 | D-dopachrome tautomerase                  | Ddt    | 29318  | 1,68 | down |
| 6192020 | 7221817 | 1427152 | D-dopachrome tautomerase                  | Ddt    | 29318  | 1,35 | up   |
| 6247985 | 7221817 | 1427153 | D-dopachrome tautomerase                  | Ddt    | 29318  | 1,01 | down |
| 6457955 | 7221817 | 1427151 | D-dopachrome tautomerase                  | Ddt    | 29318  | 1,21 | down |
| 5624537 | 7161974 | 1280115 | DEAD (Asp-Glu-Ala-Asp) box polypeptide 46 | Ddx46  | 245957 | 1,03 | up   |
| 5673094 | 7161974 | 1280113 | DEAD (Asp-Glu-Ala-Asp) box polypeptide 46 | Ddx46  | 245957 | 1,39 | down |
| 5719838 | 7161974 | 1280104 | DEAD (Asp-Glu-Ala-Asp) box polypeptide 46 | Ddx46  | 245957 | 1,23 | down |
| 5871721 | 7161974 | 1280105 | DEAD (Asp-Glu-Ala-Asp) box polypeptide 46 | Ddx46  | 245957 | 1,05 | down |
| 5997417 | 7161974 | 1280122 | DEAD (Asp-Glu-Ala-Asp) box polypeptide 46 | Ddx46  | 245957 | 1,05 | down |
| 6005570 | 7161974 | 1280106 | DEAD (Asp-Glu-Ala-Asp) box polypeptide 46 | Ddx46  | 245957 | 1,13 | down |
| 6013986 | 7161974 | 1280118 | DEAD (Asp-Glu-Ala-Asp) box polypeptide 46 | Ddx46  | 245957 | 1,00 | down |
| 6023481 | 7161974 | 1280102 | DEAD (Asp-Glu-Ala-Asp) box polypeptide 46 | Ddx46  | 245957 | 1,34 | down |
| 6032934 | 7161974 | 1280107 | DEAD (Asp-Glu-Ala-Asp) box polypeptide 46 | Ddx46  | 245957 | 1,12 | down |
| 6036064 | 7161974 | 1280112 | DEAD (Asp-Glu-Ala-Asp) box polypeptide 46 | Ddx46  | 245957 | 1,44 | up   |
| 6129767 | 7161974 | 1280100 | DEAD (Asp-Glu-Ala-Asp) box polypeptide 46 | Ddx46  | 245957 | 1,02 | down |
| 6177492 | 7161974 | 1280121 | DEAD (Asp-Glu-Ala-Asp) box polypeptide 46 | Ddx46  | 245957 | 1,29 | up   |
| 6211451 | 7161974 | 1280117 | DEAD (Asp-Glu-Ala-Asp) box polypeptide 46 | Ddx46  | 245957 | 2,45 | up   |
| 6215278 | 7161974 | 1280119 | DEAD (Asp-Glu-Ala-Asp) box polypeptide 46 | Ddx46  | 245957 | 1,17 | down |
| 6223274 | 7161974 | 1280110 | DEAD (Asp-Glu-Ala-Asp) box polypeptide 46 | Ddx46  | 245957 | 1,00 | down |
| 6224848 | 7161974 | 1280100 | DEAD (Asp-Glu-Ala-Asp) box polypeptide 46 | Ddx46  | 245957 | 2,54 | down |
| 6269619 | 7161974 | 1280120 | DEAD (Asp-Glu-Ala-Asp) box polypeptide 46 | Ddx46  | 245957 | 1,15 | up   |
| 6285081 | 7161974 | 1280111 | DEAD (Asp-Glu-Ala-Asp) box polypeptide 46 | Ddx46  | 245957 | 1,11 | down |
| 6318748 | 7161974 | 1280123 | DEAD (Asp-Glu-Ala-Asp) box polypeptide 46 | Ddx46  | 245957 | 1,22 | up   |
| 6319982 | 7161974 | 1280101 | DEAD (Asp-Glu-Ala-Asp) box polypeptide 46 | Ddx46  | 245957 | 1,06 | down |
| 6406501 | 7161974 | 1280116 | DEAD (Asp-Glu-Ala-Asp) box polypeptide 46 | Ddx46  | 245957 | 1,09 | up   |
| 6461446 | 7161974 | 1280114 | DEAD (Asp-Glu-Ala-Asp) box polypeptide 46 | Ddx46  | 245957 | 1,49 | down |
| 6480740 | 7161974 | 1280109 | DEAD (Asp-Glu-Ala-Asp) box polypeptide 46 | Ddx46  | 245957 | 1,23 | up   |
| 6600794 | 7161974 | 1280108 | DEAD (Asp-Glu-Ala-Asp) box polypeptide 46 | Ddx46  | 245957 | 1,01 | down |
| 6606665 | 7161974 | 1280103 | DEAD (Asp-Glu-Ala-Asp) box polypeptide 46 | Ddx46  | 245957 | 1,14 | down |
| 6737895 | 7161974 | 1280123 | DEAD (Asp-Glu-Ala-Asp) box polypeptide 46 | Ddx46  | 245957 | 2,46 | up   |
| 5647183 | 7185315 | 1338616 | DEAH (Asp-Glu-Ala-His) box polypeptide 38 | Dhx38  | 292007 | 1,59 | down |
| 5706465 | 7185315 | 1338592 | DEAH (Asp-Glu-Ala-His) box polypeptide 38 | Dhx38  | 292007 | 1,03 | down |
| 5768346 | 7185315 | 1338599 | DEAH (Asp-Glu-Ala-His) box polypeptide 38 | Dhx38  | 292007 | 1,11 | down |
| 5782069 | 7185315 | 1338594 | DEAH (Asp-Glu-Ala-His) box polypeptide 38 | Dhx38  | 292007 | 1,39 | down |
| 5789692 | 7185315 | 1338602 | DEAH (Asp-Glu-Ala-His) box polypeptide 38 | Dhx38  | 292007 | 1,00 | down |
| 5811226 | 7185315 | 1338600 | DEAH (Asp-Glu-Ala-His) box polypeptide 38 | Dhx38  | 292007 | 1,01 | down |
| 5825715 | 7185315 | 1338604 | DEAH (Asp-Glu-Ala-His) box polypeptide 38 | Dhx38  | 292007 | 1,03 | up   |
| 5828149 | 7185315 | 1338614 | DEAH (Asp-Glu-Ala-His) box polypeptide 38 | Dhx38  | 292007 | 1,18 | down |
| 5866026 | 7185315 | 1338595 | DEAH (Asp-Glu-Ala-His) box polypeptide 38 | Dhx38  | 292007 | 1,57 | down |
| 5876438 | 7185315 | 1338601 | DEAH (Asp-Glu-Ala-His) box polypeptide 38 | Dhx38  | 292007 | 1,65 | up   |
| 5886170 | 7185315 | 1338611 | DEAH (Asp-Glu-Ala-His) box polypeptide 38 | Dhx38  | 292007 | 2,26 | up   |
| 5950831 | 7185315 | 1338606 | DEAH (Asp-Glu-Ala-His) box polypeptide 38 | Dhx38  | 292007 | 1,30 | down |
| 5967036 | 7185315 | 1338589 | DEAH (Asp-Glu-Ala-His) box polypeptide 38 | Dhx38  | 292007 | 1,27 | down |
| 5970768 | 7185315 | 1338603 | DEAH (Asp-Glu-Ala-His) box polypeptide 38 | Dhx38  | 292007 | 1,09 | down |
| 6031647 | 7185315 | 1338615 | DEAH (Asp-Glu-Ala-His) box polypeptide 38 | Dhx38  | 292007 | 1,22 | down |
| 6060373 | 7185315 | 1338607 | DEAH (Asp-Glu-Ala-His) box polypeptide 38 | Dhx38  | 292007 | 1,36 | up   |
| 6206435 | 7185315 | 1338596 | DEAH (Asp-Glu-Ala-His) box polypeptide 38 | Dhx38  | 292007 | 1,00 | down |
| 6228683 | 7185315 | 1338591 | DEAH (Asp-Glu-Ala-His) box polypeptide 38 | Dhx38  | 292007 | 2,27 | up   |
| 6306109 | 7185315 | 1338593 | DEAH (Asp-Glu-Ala-His) box polypeptide 38 | Dhx38  | 292007 | 1,12 | down |
| 6327237 | 7185315 | 1338605 | DEAH (Asp-Glu-Ala-His) box polypeptide 38 | Dhx38  | 292007 | 1,19 | up   |
| 6468149 | 7185315 | 1338608 | DEAH (Asp-Glu-Ala-His) box polypeptide 38 | Dhx38  | 292007 | 1,30 | up   |
| 6489055 | 7185315 | 1338599 | DEAH (Asp-Glu-Ala-His) box polypeptide 38 | Dhx38  | 292007 | 1,14 | down |
| 6524036 | 7185315 | 1338613 | DEAH (Asp-Glu-Ala-His) box polypeptide 38 | Dhx38  | 292007 | 1,73 | up   |
| 6540246 | 7185315 | 1338612 | DEAH (Asp-Glu-Ala-His) box polypeptide 38 | Dhx38  | 292007 | 1,64 | up   |



|         |         |         |                                           |        |        |      |      |
|---------|---------|---------|-------------------------------------------|--------|--------|------|------|
| 6681492 | 7185315 | 1338597 | DEAH (Asp-Glu-Ala-His) box polypeptide 38 | Dhx38  | 292007 | 1,39 | down |
| 6716180 | 7185315 | 1338590 | DEAH (Asp-Glu-Ala-His) box polypeptide 38 | Dhx38  | 292007 | 1,07 | down |
| 6726250 | 7185315 | 1338609 | DEAH (Asp-Glu-Ala-His) box polypeptide 38 | Dhx38  | 292007 | 1,95 | up   |
| 6741579 | 7185315 | 1338604 | DEAH (Asp-Glu-Ala-His) box polypeptide 38 | Dhx38  | 292007 | 1,06 | up   |
| 5652667 | 7322023 | 1676660 | death-associated protein kinase 3         | Dapk3  | 64391  | 1,04 | up   |
| 5659477 | 7322023 | 1676657 | death-associated protein kinase 3         | Dapk3  | 64391  | 2,20 | up   |
| 5813669 | 7322023 | 1676663 | death-associated protein kinase 3         | Dapk3  | 64391  | 1,21 | up   |
| 5881000 | 7322023 | 1676664 | death-associated protein kinase 3         | Dapk3  | 64391  | 1,29 | up   |
| 6290068 | 7322023 | 1676659 | death-associated protein kinase 3         | Dapk3  | 64391  | 1,21 | down |
| 6337174 | 7322023 | 1676656 | death-associated protein kinase 3         | Dapk3  | 64391  | 1,13 | down |
| 6350329 | 7322023 | 1676665 | death-associated protein kinase 3         | Dapk3  | 64391  | 1,80 | down |
| 6707968 | 7322023 | 1676658 | death-associated protein kinase 3         | Dapk3  | 64391  | 1,44 | down |
| 6710028 | 7322023 | 1676662 | death-associated protein kinase 3         | Dapk3  | 64391  | 1,07 | down |
| 6735174 | 7322023 | 1676661 | death-associated protein kinase 3         | Dapk3  | 64391  | 1,22 | down |
| 5786290 | 7037764 | 979960  | dedicator of cyto-kinesis 1               | Dock1  | 309081 | 1,48 | up   |
| 6270834 | 7037764 | 980111  | dedicator of cyto-kinesis 1               | Dock1  | 309081 | 1,74 | up   |
| 6599844 | 7037764 | 979960  | dedicator of cyto-kinesis 1               | Dock1  | 309081 | 1,10 | up   |
| 5661157 | 7378997 | 1818630 | dedicator of cytokinesis 11               | Dock11 | 313438 | 1,21 | down |
| 5764690 | 7378997 | 1818634 | dedicator of cytokinesis 11               | Dock11 | 313438 | 1,09 | down |
| 5883165 | 7378997 | 1818625 | dedicator of cytokinesis 11               | Dock11 | 313438 | 1,15 | down |
| 5891949 | 7378997 | 1818627 | dedicator of cytokinesis 11               | Dock11 | 313438 | 1,10 | down |
| 6077072 | 7378997 | 1818620 | dedicator of cytokinesis 11               | Dock11 | 313438 | 1,13 | down |
| 6228623 | 7378997 | 1818626 | dedicator of cytokinesis 11               | Dock11 | 313438 | 1,05 | up   |
| 6299110 | 7378997 | 1818629 | dedicator of cytokinesis 11               | Dock11 | 313438 | 1,22 | down |
| 6435747 | 7378997 | 1818633 | dedicator of cytokinesis 11               | Dock11 | 313438 | 1,05 | down |
| 6439128 | 7378997 | 1818632 | dedicator of cytokinesis 11               | Dock11 | 313438 | 1,08 | up   |
| 6502137 | 7378997 | 1818630 | dedicator of cytokinesis 11               | Dock11 | 313438 | 1,52 | down |
| 6588492 | 7378997 | 1818624 | dedicator of cytokinesis 11               | Dock11 | 313438 | 1,32 | down |
| 6590920 | 7378997 | 1818628 | dedicator of cytokinesis 11               | Dock11 | 313438 | 1,17 | down |
| 6619059 | 7378997 | 1818620 | dedicator of cytokinesis 11               | Dock11 | 313438 | 1,27 | down |
| 6653758 | 7378997 | 1818625 | dedicator of cytokinesis 11               | Dock11 | 313438 | 1,13 | down |
| 6661663 | 7378997 | 1818623 | dedicator of cytokinesis 11               | Dock11 | 313438 | 1,01 | up   |
| 5636720 | 7076160 | 1070877 | dedicator of cytokinesis 2                | Dock2  | 360509 | 1,08 | down |
| 5673943 | 7076160 | 1070878 | dedicator of cytokinesis 2                | Dock2  | 360509 | 1,43 | up   |
| 5755350 | 7076160 | 1070911 | dedicator of cytokinesis 2                | Dock2  | 360509 | 1,78 | down |
| 5760791 | 7076160 | 1070876 | dedicator of cytokinesis 2                | Dock2  | 360509 | 1,04 | down |
| 5776910 | 7076160 | 1070884 | dedicator of cytokinesis 2                | Dock2  | 360509 | 1,41 | down |
| 5789587 | 7076160 | 1070961 | dedicator of cytokinesis 2                | Dock2  | 360509 | 1,41 | up   |
| 5793122 | 7076160 | 1070952 | dedicator of cytokinesis 2                | Dock2  | 360509 | 1,26 | down |
| 5796817 | 7076160 | 1070975 | dedicator of cytokinesis 2                | Dock2  | 360509 | 1,29 | up   |
| 5804576 | 7076160 | 1070969 | dedicator of cytokinesis 2                | Dock2  | 360509 | 1,02 | down |
| 5818606 | 7076160 | 1070910 | dedicator of cytokinesis 2                | Dock2  | 360509 | 1,05 | up   |
| 5844965 | 7076160 | 1070976 | dedicator of cytokinesis 2                | Dock2  | 360509 | 1,27 | up   |
| 5855793 | 7076160 | 1070957 | dedicator of cytokinesis 2                | Dock2  | 360509 | 1,65 | down |
| 5882972 | 7076160 | 1070967 | dedicator of cytokinesis 2                | Dock2  | 360509 | 1,06 | up   |
| 5903108 | 7076160 | 1070882 | dedicator of cytokinesis 2                | Dock2  | 360509 | 1,38 | down |
| 5910678 | 7076160 | 1070896 | dedicator of cytokinesis 2                | Dock2  | 360509 | 1,29 | down |
| 5918417 | 7076160 | 1070959 | dedicator of cytokinesis 2                | Dock2  | 360509 | 1,06 | up   |
| 6073137 | 7076160 | 1070955 | dedicator of cytokinesis 2                | Dock2  | 360509 | 1,15 | up   |
| 6076502 | 7076160 | 1070906 | dedicator of cytokinesis 2                | Dock2  | 360509 | 1,15 | up   |
| 6094863 | 7076160 | 1070977 | dedicator of cytokinesis 2                | Dock2  | 360509 | 1,11 | down |
| 6133534 | 7076160 | 1070946 | dedicator of cytokinesis 2                | Dock2  | 360509 | 1,09 | down |
| 6149424 | 7076160 | 1070978 | dedicator of cytokinesis 2                | Dock2  | 360509 | 1,28 | up   |
| 6151757 | 7076160 | 1070958 | dedicator of cytokinesis 2                | Dock2  | 360509 | 1,23 | up   |
| 6152981 | 7076160 | 1070967 | dedicator of cytokinesis 2                | Dock2  | 360509 | 2,14 | up   |
| 6157055 | 7076160 | 1070957 | dedicator of cytokinesis 2                | Dock2  | 360509 | 1,45 | down |

|         |         |         |                             |       |        |      |      |
|---------|---------|---------|-----------------------------|-------|--------|------|------|
| 6162216 | 7076160 | 1070873 | dedicator of cytokinesis 2  | Dock2 | 360509 | 1,01 | up   |
| 6162734 | 7076160 | 1070898 | dedicator of cytokinesis 2  | Dock2 | 360509 | 1,64 | down |
| 6163181 | 7076160 | 1070938 | dedicator of cytokinesis 2  | Dock2 | 360509 | 1,31 | up   |
| 6171666 | 7076160 | 1070947 | dedicator of cytokinesis 2  | Dock2 | 360509 | 1,49 | down |
| 6173975 | 7076160 | 1070890 | dedicator of cytokinesis 2  | Dock2 | 360509 | 1,05 | down |
| 6176484 | 7076160 | 1070900 | dedicator of cytokinesis 2  | Dock2 | 360509 | 1,05 | down |
| 6230375 | 7076160 | 1070882 | dedicator of cytokinesis 2  | Dock2 | 360509 | 1,48 | down |
| 6235892 | 7076160 | 1070964 | dedicator of cytokinesis 2  | Dock2 | 360509 | 1,10 | down |
| 6246483 | 7076160 | 1070968 | dedicator of cytokinesis 2  | Dock2 | 360509 | 1,25 | down |
| 6261178 | 7076160 | 1070881 | dedicator of cytokinesis 2  | Dock2 | 360509 | 1,55 | up   |
| 6319477 | 7076160 | 1070889 | dedicator of cytokinesis 2  | Dock2 | 360509 | 1,01 | up   |
| 6348215 | 7076160 | 1070986 | dedicator of cytokinesis 2  | Dock2 | 360509 | 1,12 | up   |
| 6371139 | 7076160 | 1070948 | dedicator of cytokinesis 2  | Dock2 | 360509 | 1,05 | down |
| 6407234 | 7076160 | 1070956 | dedicator of cytokinesis 2  | Dock2 | 360509 | 1,36 | up   |
| 6408463 | 7076160 | 1070981 | dedicator of cytokinesis 2  | Dock2 | 360509 | 1,02 | up   |
| 6420017 | 7076160 | 1070954 | dedicator of cytokinesis 2  | Dock2 | 360509 | 2,42 | down |
| 6426264 | 7076160 | 1070905 | dedicator of cytokinesis 2  | Dock2 | 360509 | 1,22 | down |
| 6481619 | 7076160 | 1070966 | dedicator of cytokinesis 2  | Dock2 | 360509 | 1,15 | up   |
| 6494870 | 7076160 | 1070875 | dedicator of cytokinesis 2  | Dock2 | 360509 | 1,03 | up   |
| 6499708 | 7076160 | 1070893 | dedicator of cytokinesis 2  | Dock2 | 360509 | 1,06 | down |
| 6504113 | 7076160 | 1070892 | dedicator of cytokinesis 2  | Dock2 | 360509 | 1,30 | up   |
| 6535542 | 7076160 | 1070972 | dedicator of cytokinesis 2  | Dock2 | 360509 | 1,25 | down |
| 6568761 | 7076160 | 1070986 | dedicator of cytokinesis 2  | Dock2 | 360509 | 3,82 | up   |
| 6571763 | 7076160 | 1070891 | dedicator of cytokinesis 2  | Dock2 | 360509 | 1,03 | down |
| 6589221 | 7076160 | 1070974 | dedicator of cytokinesis 2  | Dock2 | 360509 | 1,37 | down |
| 6593770 | 7076160 | 1070880 | dedicator of cytokinesis 2  | Dock2 | 360509 | 1,12 | up   |
| 6604967 | 7076160 | 1070895 | dedicator of cytokinesis 2  | Dock2 | 360509 | 1,12 | down |
| 6646723 | 7076160 | 1070973 | dedicator of cytokinesis 2  | Dock2 | 360509 | 1,43 | up   |
| 6667086 | 7076160 | 1070874 | dedicator of cytokinesis 2  | Dock2 | 360509 | 1,23 | up   |
| 6737817 | 7076160 | 1070907 | dedicator of cytokinesis 2  | Dock2 | 360509 | 1,25 | up   |
| 5622020 | 7349817 | 1744588 | dedicator of cyto-kinesis 3 | Dock3 | 315992 | 1,41 | up   |
| 5623464 | 7349817 | 1744610 | dedicator of cyto-kinesis 3 | Dock3 | 315992 | 2,37 | up   |
| 5630317 | 7349817 | 1744594 | dedicator of cyto-kinesis 3 | Dock3 | 315992 | 1,27 | up   |
| 5630477 | 7349817 | 1744654 | dedicator of cyto-kinesis 3 | Dock3 | 315992 | 1,17 | up   |
| 5677155 | 7349817 | 1744630 | dedicator of cyto-kinesis 3 | Dock3 | 315992 | 1,14 | down |
| 5685188 | 7349817 | 1744650 | dedicator of cyto-kinesis 3 | Dock3 | 315992 | 1,52 | down |
| 5720318 | 7349817 | 1744640 | dedicator of cyto-kinesis 3 | Dock3 | 315992 | 1,14 | down |
| 5727970 | 7349817 | 1744662 | dedicator of cyto-kinesis 3 | Dock3 | 315992 | 1,17 | up   |
| 5802958 | 7349817 | 1744617 | dedicator of cyto-kinesis 3 | Dock3 | 315992 | 1,11 | up   |
| 5808612 | 7349817 | 1744592 | dedicator of cyto-kinesis 3 | Dock3 | 315992 | 2,21 | up   |
| 5843374 | 7349817 | 1744622 | dedicator of cyto-kinesis 3 | Dock3 | 315992 | 1,06 | down |
| 5860114 | 7349817 | 1744625 | dedicator of cyto-kinesis 3 | Dock3 | 315992 | 1,24 | down |
| 5874419 | 7349817 | 1744638 | dedicator of cyto-kinesis 3 | Dock3 | 315992 | 1,29 | up   |
| 5879239 | 7349817 | 1744585 | dedicator of cyto-kinesis 3 | Dock3 | 315992 | 1,18 | up   |
| 5881469 | 7349817 | 1744626 | dedicator of cyto-kinesis 3 | Dock3 | 315992 | 1,05 | down |
| 5882451 | 7349817 | 1744622 | dedicator of cyto-kinesis 3 | Dock3 | 315992 | 1,30 | down |
| 5883736 | 7349817 | 1744624 | dedicator of cyto-kinesis 3 | Dock3 | 315992 | 1,24 | down |
| 5885428 | 7349817 | 1744593 | dedicator of cyto-kinesis 3 | Dock3 | 315992 | 1,18 | down |
| 5892071 | 7349817 | 1744659 | dedicator of cyto-kinesis 3 | Dock3 | 315992 | 1,12 | up   |
| 5892811 | 7349817 | 1744635 | dedicator of cyto-kinesis 3 | Dock3 | 315992 | 1,11 | down |
| 5944844 | 7349817 | 1744638 | dedicator of cyto-kinesis 3 | Dock3 | 315992 | 1,22 | down |
| 5955440 | 7349817 | 1744629 | dedicator of cyto-kinesis 3 | Dock3 | 315992 | 1,11 | up   |
| 6056733 | 7349817 | 1744621 | dedicator of cyto-kinesis 3 | Dock3 | 315992 | 1,45 | up   |
| 6065879 | 7349817 | 1744637 | dedicator of cyto-kinesis 3 | Dock3 | 315992 | 1,22 | down |
| 6128769 | 7349817 | 1744586 | dedicator of cyto-kinesis 3 | Dock3 | 315992 | 1,10 | up   |
| 6165403 | 7349817 | 1744634 | dedicator of cyto-kinesis 3 | Dock3 | 315992 | 1,08 | down |

|         |         |         |                             |       |        |      |      |
|---------|---------|---------|-----------------------------|-------|--------|------|------|
| 6198829 | 7349817 | 1744621 | dedicator of cyto-kinesis 3 | Dock3 | 315992 | 1,09 | down |
| 6237809 | 7349817 | 1744615 | dedicator of cyto-kinesis 3 | Dock3 | 315992 | 1,82 | down |
| 6237918 | 7349817 | 1744593 | dedicator of cyto-kinesis 3 | Dock3 | 315992 | 1,02 | up   |
| 6239848 | 7349817 | 1744620 | dedicator of cyto-kinesis 3 | Dock3 | 315992 | 1,11 | down |
| 6264821 | 7349817 | 1744614 | dedicator of cyto-kinesis 3 | Dock3 | 315992 | 1,14 | down |
| 6273394 | 7349817 | 1744604 | dedicator of cyto-kinesis 3 | Dock3 | 315992 | 1,21 | down |
| 6292892 | 7349817 | 1744606 | dedicator of cyto-kinesis 3 | Dock3 | 315992 | 1,03 | down |
| 6296140 | 7349817 | 1744636 | dedicator of cyto-kinesis 3 | Dock3 | 315992 | 1,27 | up   |
| 6306901 | 7349817 | 1744631 | dedicator of cyto-kinesis 3 | Dock3 | 315992 | 1,43 | down |
| 6310015 | 7349817 | 1744650 | dedicator of cyto-kinesis 3 | Dock3 | 315992 | 1,11 | up   |
| 6310496 | 7349817 | 1744639 | dedicator of cyto-kinesis 3 | Dock3 | 315992 | 1,08 | down |
| 6313334 | 7349817 | 1744595 | dedicator of cyto-kinesis 3 | Dock3 | 315992 | 1,08 | down |
| 6360175 | 7349817 | 1744656 | dedicator of cyto-kinesis 3 | Dock3 | 315992 | 1,18 | up   |
| 6368226 | 7349817 | 1744594 | dedicator of cyto-kinesis 3 | Dock3 | 315992 | 1,38 | up   |
| 6371353 | 7349817 | 1744603 | dedicator of cyto-kinesis 3 | Dock3 | 315992 | 1,15 | up   |
| 6385701 | 7349817 | 1744618 | dedicator of cyto-kinesis 3 | Dock3 | 315992 | 1,38 | up   |
| 6401953 | 7349817 | 1744611 | dedicator of cyto-kinesis 3 | Dock3 | 315992 | 1,34 | up   |
| 6486839 | 7349817 | 1744609 | dedicator of cyto-kinesis 3 | Dock3 | 315992 | 1,30 | up   |
| 6501565 | 7349817 | 1744612 | dedicator of cyto-kinesis 3 | Dock3 | 315992 | 1,27 | down |
| 6502039 | 7349817 | 1744616 | dedicator of cyto-kinesis 3 | Dock3 | 315992 | 1,63 | up   |
| 6532325 | 7349817 | 1744648 | dedicator of cyto-kinesis 3 | Dock3 | 315992 | 2,13 | up   |
| 6568756 | 7349817 | 1744623 | dedicator of cyto-kinesis 3 | Dock3 | 315992 | 1,03 | up   |
| 6612187 | 7349817 | 1744652 | dedicator of cyto-kinesis 3 | Dock3 | 315992 | 1,34 | down |
| 6612561 | 7349817 | 1744633 | dedicator of cyto-kinesis 3 | Dock3 | 315992 | 1,25 | up   |
| 6644682 | 7349817 | 1744650 | dedicator of cyto-kinesis 3 | Dock3 | 315992 | 1,11 | up   |
| 6670549 | 7349817 | 1744632 | dedicator of cyto-kinesis 3 | Dock3 | 315992 | 1,55 | up   |
| 6686195 | 7349817 | 1744646 | dedicator of cyto-kinesis 3 | Dock3 | 315992 | 1,50 | up   |
| 6694371 | 7349817 | 1744620 | dedicator of cyto-kinesis 3 | Dock3 | 315992 | 1,01 | up   |
| 6728780 | 7349817 | 1744649 | dedicator of cyto-kinesis 3 | Dock3 | 315992 | 1,37 | up   |
| 6738251 | 7349817 | 1744591 | dedicator of cyto-kinesis 3 | Dock3 | 315992 | 1,19 | up   |
| 5619477 | 7343052 | 1727542 | dedicator of cytokinesis 6  | Dock6 | 367039 | 1,12 | down |
| 5628661 | 7343052 | 1727511 | dedicator of cytokinesis 6  | Dock6 | 367039 | 1,32 | down |
| 5635602 | 7343052 | 1727534 | dedicator of cytokinesis 6  | Dock6 | 367039 | 1,10 | up   |
| 5714395 | 7343052 | 1727541 | dedicator of cytokinesis 6  | Dock6 | 367039 | 1,30 | up   |
| 5716538 | 7343052 | 1727501 | dedicator of cytokinesis 6  | Dock6 | 367039 | 1,38 | up   |
| 5744378 | 7343052 | 1727515 | dedicator of cytokinesis 6  | Dock6 | 367039 | 1,50 | up   |
| 5762277 | 7343052 | 1727540 | dedicator of cytokinesis 6  | Dock6 | 367039 | 2,22 | up   |
| 5785954 | 7343052 | 1727548 | dedicator of cytokinesis 6  | Dock6 | 367039 | 1,03 | up   |
| 5848315 | 7343052 | 1727552 | dedicator of cytokinesis 6  | Dock6 | 367039 | 1,10 | down |
| 5869156 | 7343052 | 1727522 | dedicator of cytokinesis 6  | Dock6 | 367039 | 1,24 | up   |
| 5878071 | 7343052 | 1727551 | dedicator of cytokinesis 6  | Dock6 | 367039 | 1,37 | down |
| 5902522 | 7343052 | 1727518 | dedicator of cytokinesis 6  | Dock6 | 367039 | 1,05 | up   |
| 5919941 | 7343052 | 1727525 | dedicator of cytokinesis 6  | Dock6 | 367039 | 1,21 | up   |
| 5943567 | 7343052 | 1727545 | dedicator of cytokinesis 6  | Dock6 | 367039 | 1,94 | down |
| 5969432 | 7343052 | 1727510 | dedicator of cytokinesis 6  | Dock6 | 367039 | 1,86 | up   |
| 5989182 | 7343052 | 1727532 | dedicator of cytokinesis 6  | Dock6 | 367039 | 1,13 | down |
| 6005933 | 7343052 | 1727544 | dedicator of cytokinesis 6  | Dock6 | 367039 | 1,25 | down |
| 6006575 | 7343052 | 1727520 | dedicator of cytokinesis 6  | Dock6 | 367039 | 1,28 | down |
| 6013369 | 7343052 | 1727516 | dedicator of cytokinesis 6  | Dock6 | 367039 | 1,49 | up   |
| 6016301 | 7343052 | 1727547 | dedicator of cytokinesis 6  | Dock6 | 367039 | 1,24 | up   |
| 6067186 | 7343052 | 1727507 | dedicator of cytokinesis 6  | Dock6 | 367039 | 1,15 | up   |
| 6072479 | 7343052 | 1727524 | dedicator of cytokinesis 6  | Dock6 | 367039 | 1,10 | up   |
| 6089642 | 7343052 | 1727519 | dedicator of cytokinesis 6  | Dock6 | 367039 | 1,33 | down |
| 6123599 | 7343052 | 1727521 | dedicator of cytokinesis 6  | Dock6 | 367039 | 1,34 | down |
| 6191312 | 7343052 | 1727535 | dedicator of cytokinesis 6  | Dock6 | 367039 | 1,35 | up   |
| 6230256 | 7343052 | 1727502 | dedicator of cytokinesis 6  | Dock6 | 367039 | 1,02 | down |

|         |         |         |                                                         |       |        |      |      |
|---------|---------|---------|---------------------------------------------------------|-------|--------|------|------|
| 6233960 | 7343052 | 1727536 | dedicator of cytokinesis 6                              | Dock6 | 367039 | 1,15 | down |
| 6250228 | 7343052 | 1727540 | dedicator of cytokinesis 6                              | Dock6 | 367039 | 1,11 | down |
| 6270147 | 7343052 | 1727533 | dedicator of cytokinesis 6                              | Dock6 | 367039 | 1,27 | down |
| 6282337 | 7343052 | 1727503 | dedicator of cytokinesis 6                              | Dock6 | 367039 | 1,02 | up   |
| 6292815 | 7343052 | 1727505 | dedicator of cytokinesis 6                              | Dock6 | 367039 | 1,15 | up   |
| 6320641 | 7343052 | 1727531 | dedicator of cytokinesis 6                              | Dock6 | 367039 | 1,15 | up   |
| 6333159 | 7343052 | 1727507 | dedicator of cytokinesis 6                              | Dock6 | 367039 | 1,73 | down |
| 6363061 | 7343052 | 1727553 | dedicator of cytokinesis 6                              | Dock6 | 367039 | 1,46 | down |
| 6368287 | 7343052 | 1727549 | dedicator of cytokinesis 6                              | Dock6 | 367039 | 1,05 | down |
| 6381288 | 7343052 | 1727527 | dedicator of cytokinesis 6                              | Dock6 | 367039 | 1,05 | up   |
| 6382684 | 7343052 | 1727550 | dedicator of cytokinesis 6                              | Dock6 | 367039 | 1,52 | down |
| 6386771 | 7343052 | 1727526 | dedicator of cytokinesis 6                              | Dock6 | 367039 | 1,03 | up   |
| 6414962 | 7343052 | 1727512 | dedicator of cytokinesis 6                              | Dock6 | 367039 | 1,09 | down |
| 6480170 | 7343052 | 1727517 | dedicator of cytokinesis 6                              | Dock6 | 367039 | 1,55 | up   |
| 6488991 | 7343052 | 1727519 | dedicator of cytokinesis 6                              | Dock6 | 367039 | 1,90 | down |
| 6499372 | 7343052 | 1727523 | dedicator of cytokinesis 6                              | Dock6 | 367039 | 1,00 | up   |
| 6514265 | 7343052 | 1727543 | dedicator of cytokinesis 6                              | Dock6 | 367039 | 1,05 | up   |
| 6548939 | 7343052 | 1727529 | dedicator of cytokinesis 6                              | Dock6 | 367039 | 1,26 | down |
| 6553691 | 7343052 | 1727530 | dedicator of cytokinesis 6                              | Dock6 | 367039 | 1,50 | up   |
| 6574747 | 7343052 | 1727508 | dedicator of cytokinesis 6                              | Dock6 | 367039 | 1,10 | down |
| 6587522 | 7343052 | 1727509 | dedicator of cytokinesis 6                              | Dock6 | 367039 | 1,31 | down |
| 6590146 | 7343052 | 1727543 | dedicator of cytokinesis 6                              | Dock6 | 367039 | 1,06 | down |
| 6590519 | 7343052 | 1727518 | dedicator of cytokinesis 6                              | Dock6 | 367039 | 1,31 | up   |
| 6590944 | 7343052 | 1727514 | dedicator of cytokinesis 6                              | Dock6 | 367039 | 1,59 | down |
| 6610451 | 7343052 | 1727504 | dedicator of cytokinesis 6                              | Dock6 | 367039 | 1,82 | up   |
| 6618327 | 7343052 | 1727546 | dedicator of cytokinesis 6                              | Dock6 | 367039 | 1,07 | up   |
| 6625166 | 7343052 | 1727513 | dedicator of cytokinesis 6                              | Dock6 | 367039 | 1,28 | up   |
| 6666486 | 7343052 | 1727519 | dedicator of cytokinesis 6                              | Dock6 | 367039 | 1,06 | down |
| 6685625 | 7343052 | 1727506 | dedicator of cytokinesis 6                              | Dock6 | 367039 | 1,25 | down |
| 5675411 | 7058768 | 1028799 | deformed epidermal autoregulatory factor 1 (Drosophila) | Deaf1 | 83632  | 2,49 | up   |
| 5778958 | 7058768 | 1028790 | deformed epidermal autoregulatory factor 1 (Drosophila) | Deaf1 | 83632  | 1,50 | up   |
| 5806604 | 7058768 | 1028799 | deformed epidermal autoregulatory factor 1 (Drosophila) | Deaf1 | 83632  | 1,38 | up   |
| 5960970 | 7058768 | 1028791 | deformed epidermal autoregulatory factor 1 (Drosophila) | Deaf1 | 83632  | 1,09 | up   |
| 6044525 | 7058768 | 1028799 | deformed epidermal autoregulatory factor 1 (Drosophila) | Deaf1 | 83632  | 1,87 | up   |
| 6094678 | 7058768 | 1028787 | deformed epidermal autoregulatory factor 1 (Drosophila) | Deaf1 | 83632  | 1,37 | down |
| 6150050 | 7058768 | 1028789 | deformed epidermal autoregulatory factor 1 (Drosophila) | Deaf1 | 83632  | 1,27 | down |
| 6227807 | 7058768 | 1028788 | deformed epidermal autoregulatory factor 1 (Drosophila) | Deaf1 | 83632  | 1,88 | down |
| 6393456 | 7058768 | 1028794 | deformed epidermal autoregulatory factor 1 (Drosophila) | Deaf1 | 83632  | 1,01 | down |
| 6409387 | 7058768 | 1028790 | deformed epidermal autoregulatory factor 1 (Drosophila) | Deaf1 | 83632  | 1,14 | up   |
| 6430321 | 7058768 | 1028798 | deformed epidermal autoregulatory factor 1 (Drosophila) | Deaf1 | 83632  | 1,17 | down |
| 6473906 | 7058768 | 1028796 | deformed epidermal autoregulatory factor 1 (Drosophila) | Deaf1 | 83632  | 1,28 | up   |
| 6597555 | 7058768 | 1028797 | deformed epidermal autoregulatory factor 1 (Drosophila) | Deaf1 | 83632  | 1,21 | up   |
| 6677201 | 7058768 | 1028793 | deformed epidermal autoregulatory factor 1 (Drosophila) | Deaf1 | 83632  | 1,08 | down |
| 6706870 | 7058768 | 1028799 | deformed epidermal autoregulatory factor 1 (Drosophila) | Deaf1 | 83632  | 2,12 | up   |
| 6707651 | 7058768 | 1028795 | deformed epidermal autoregulatory factor 1 (Drosophila) | Deaf1 | 83632  | 1,12 | down |
| 6737066 | 7058768 | 1028792 | deformed epidermal autoregulatory factor 1 (Drosophila) | Deaf1 | 83632  | 1,14 | up   |
| 6739360 | 7058768 | 1028799 | deformed epidermal autoregulatory factor 1 (Drosophila) | Deaf1 | 83632  | 1,13 | up   |
| 5761610 | 7307688 | 1641930 | dehydrogenase/reductase (SDR family) member 7           | Dhrs7 | 299131 | 1,02 | down |
| 5830097 | 7307688 | 1641934 | dehydrogenase/reductase (SDR family) member 7           | Dhrs7 | 299131 | 2,27 | down |
| 6054137 | 7307688 | 1641932 | dehydrogenase/reductase (SDR family) member 7           | Dhrs7 | 299131 | 1,94 | down |
| 6167779 | 7307688 | 1641928 | dehydrogenase/reductase (SDR family) member 7           | Dhrs7 | 299131 | 1,36 | up   |
| 6193968 | 7307688 | 1641931 | dehydrogenase/reductase (SDR family) member 7           | Dhrs7 | 299131 | 1,11 | down |
| 6287284 | 7307688 | 1641929 | dehydrogenase/reductase (SDR family) member 7           | Dhrs7 | 299131 | 1,17 | up   |
| 6421191 | 7307688 | 1641933 | dehydrogenase/reductase (SDR family) member 7           | Dhrs7 | 299131 | 1,70 | down |
| 6678118 | 7307688 | 1641935 | dehydrogenase/reductase (SDR family) member 7           | Dhrs7 | 299131 | 1,11 | up   |
| 6726376 | 7307688 | 1641928 | dehydrogenase/reductase (SDR family) member 7           | Dhrs7 | 299131 | 1,54 | up   |

|         |         |         |                                     |       |        |      |      |
|---------|---------|---------|-------------------------------------|-------|--------|------|------|
| 5782500 | 7146093 | 1240973 | deleted in liver cancer 1           | Dlc1  | 58834  | 1,94 | down |
| 5845664 | 7146093 | 1240961 | deleted in liver cancer 1           | Dlc1  | 58834  | 1,60 | down |
| 5919066 | 7146093 | 1240983 | deleted in liver cancer 1           | Dlc1  | 58834  | 1,14 | up   |
| 5946277 | 7146093 | 1240960 | deleted in liver cancer 1           | Dlc1  | 58834  | 1,52 | down |
| 6022501 | 7146093 | 1240974 | deleted in liver cancer 1           | Dlc1  | 58834  | 1,22 | down |
| 6078198 | 7146093 | 1240980 | deleted in liver cancer 1           | Dlc1  | 58834  | 1,18 | down |
| 6097567 | 7146093 | 1240968 | deleted in liver cancer 1           | Dlc1  | 58834  | 1,19 | down |
| 6114195 | 7146093 | 1240984 | deleted in liver cancer 1           | Dlc1  | 58834  | 1,06 | up   |
| 6173999 | 7146093 | 1240976 | deleted in liver cancer 1           | Dlc1  | 58834  | 1,19 | down |
| 6203162 | 7146093 | 1240985 | deleted in liver cancer 1           | Dlc1  | 58834  | 2,28 | down |
| 6212119 | 7146093 | 1240983 | deleted in liver cancer 1           | Dlc1  | 58834  | 1,41 | down |
| 6226275 | 7146093 | 1240982 | deleted in liver cancer 1           | Dlc1  | 58834  | 1,20 | up   |
| 6297338 | 7146093 | 1240967 | deleted in liver cancer 1           | Dlc1  | 58834  | 1,10 | down |
| 6317400 | 7146093 | 1240977 | deleted in liver cancer 1           | Dlc1  | 58834  | 1,33 | up   |
| 6351433 | 7146093 | 1240972 | deleted in liver cancer 1           | Dlc1  | 58834  | 1,58 | down |
| 6362392 | 7146093 | 1240976 | deleted in liver cancer 1           | Dlc1  | 58834  | 1,10 | down |
| 6459740 | 7146093 | 1240984 | deleted in liver cancer 1           | Dlc1  | 58834  | 1,75 | down |
| 6645120 | 7146093 | 1240981 | deleted in liver cancer 1           | Dlc1  | 58834  | 1,19 | down |
| 5624138 | 7037488 | 979302  | deleted in malignant brain tumors 1 | Dmbt1 | 170568 | 1,05 | up   |
| 5682388 | 7037488 | 979285  | deleted in malignant brain tumors 1 | Dmbt1 | 170568 | 1,15 | down |
| 5685260 | 7037488 | 979277  | deleted in malignant brain tumors 1 | Dmbt1 | 170568 | 1,11 | up   |
| 5710068 | 7037488 | 979271  | deleted in malignant brain tumors 1 | Dmbt1 | 170568 | 1,27 | down |
| 5716461 | 7037488 | 979258  | deleted in malignant brain tumors 1 | Dmbt1 | 170568 | 1,00 | down |
| 5751078 | 7037488 | 979289  | deleted in malignant brain tumors 1 | Dmbt1 | 170568 | 1,14 | up   |
| 5758983 | 7037488 | 979273  | deleted in malignant brain tumors 1 | Dmbt1 | 170568 | 1,69 | down |
| 5778569 | 7037488 | 979297  | deleted in malignant brain tumors 1 | Dmbt1 | 170568 | 1,70 | down |
| 5841979 | 7037488 | 979295  | deleted in malignant brain tumors 1 | Dmbt1 | 170568 | 1,02 | up   |
| 5850004 | 7037488 | 979298  | deleted in malignant brain tumors 1 | Dmbt1 | 170568 | 1,06 | up   |
| 5928472 | 7037488 | 979300  | deleted in malignant brain tumors 1 | Dmbt1 | 170568 | 1,52 | down |
| 5986501 | 7037488 | 979272  | deleted in malignant brain tumors 1 | Dmbt1 | 170568 | 1,09 | up   |
| 5997221 | 7037488 | 979272  | deleted in malignant brain tumors 1 | Dmbt1 | 170568 | 1,15 | down |
| 6044339 | 7037488 | 979282  | deleted in malignant brain tumors 1 | Dmbt1 | 170568 | 1,03 | down |
| 6074350 | 7037488 | 979295  | deleted in malignant brain tumors 1 | Dmbt1 | 170568 | 1,55 | up   |
| 6095710 | 7037488 | 979257  | deleted in malignant brain tumors 1 | Dmbt1 | 170568 | 1,36 | down |
| 6098703 | 7037488 | 979270  | deleted in malignant brain tumors 1 | Dmbt1 | 170568 | 1,39 | up   |
| 6105899 | 7037488 | 979281  | deleted in malignant brain tumors 1 | Dmbt1 | 170568 | 1,58 | up   |
| 6109487 | 7037488 | 979295  | deleted in malignant brain tumors 1 | Dmbt1 | 170568 | 1,27 | down |
| 6116995 | 7037488 | 979288  | deleted in malignant brain tumors 1 | Dmbt1 | 170568 | 1,72 | up   |
| 6126374 | 7037488 | 979261  | deleted in malignant brain tumors 1 | Dmbt1 | 170568 | 1,16 | up   |
| 6182481 | 7037488 | 979276  | deleted in malignant brain tumors 1 | Dmbt1 | 170568 | 1,09 | down |
| 6187283 | 7037488 | 979286  | deleted in malignant brain tumors 1 | Dmbt1 | 170568 | 1,65 | up   |
| 6195131 | 7037488 | 979294  | deleted in malignant brain tumors 1 | Dmbt1 | 170568 | 1,14 | down |
| 6200099 | 7037488 | 979261  | deleted in malignant brain tumors 1 | Dmbt1 | 170568 | 1,47 | down |
| 6206643 | 7037488 | 979284  | deleted in malignant brain tumors 1 | Dmbt1 | 170568 | 1,08 | up   |
| 6207118 | 7037488 | 979266  | deleted in malignant brain tumors 1 | Dmbt1 | 170568 | 1,78 | down |
| 6209744 | 7037488 | 979296  | deleted in malignant brain tumors 1 | Dmbt1 | 170568 | 1,15 | up   |
| 6224451 | 7037488 | 979287  | deleted in malignant brain tumors 1 | Dmbt1 | 170568 | 1,02 | up   |
| 6226287 | 7037488 | 979290  | deleted in malignant brain tumors 1 | Dmbt1 | 170568 | 1,03 | up   |
| 6266118 | 7037488 | 979297  | deleted in malignant brain tumors 1 | Dmbt1 | 170568 | 1,18 | down |
| 6305371 | 7037488 | 979262  | deleted in malignant brain tumors 1 | Dmbt1 | 170568 | 1,14 | up   |
| 6347721 | 7037488 | 979283  | deleted in malignant brain tumors 1 | Dmbt1 | 170568 | 1,25 | up   |
| 6348340 | 7037488 | 979279  | deleted in malignant brain tumors 1 | Dmbt1 | 170568 | 1,37 | down |
| 6377118 | 7037488 | 979267  | deleted in malignant brain tumors 1 | Dmbt1 | 170568 | 1,06 | up   |
| 6379088 | 7037488 | 979268  | deleted in malignant brain tumors 1 | Dmbt1 | 170568 | 1,22 | up   |
| 6419967 | 7037488 | 979293  | deleted in malignant brain tumors 1 | Dmbt1 | 170568 | 1,32 | up   |
| 6439779 | 7037488 | 979284  | deleted in malignant brain tumors 1 | Dmbt1 | 170568 | 1,19 | up   |

|         |         |         |                                        |       |        |      |      |
|---------|---------|---------|----------------------------------------|-------|--------|------|------|
| 6446564 | 7037488 | 979284  | deleted in malignant brain tumors 1    | Dmbt1 | 170568 | 1,13 | down |
| 6447723 | 7037488 | 979264  | deleted in malignant brain tumors 1    | Dmbt1 | 170568 | 1,26 | down |
| 6484677 | 7037488 | 979272  | deleted in malignant brain tumors 1    | Dmbt1 | 170568 | 1,76 | down |
| 6507382 | 7037488 | 979263  | deleted in malignant brain tumors 1    | Dmbt1 | 170568 | 1,33 | up   |
| 6507522 | 7037488 | 979260  | deleted in malignant brain tumors 1    | Dmbt1 | 170568 | 1,02 | up   |
| 6509074 | 7037488 | 979303  | deleted in malignant brain tumors 1    | Dmbt1 | 170568 | 1,12 | down |
| 6528635 | 7037488 | 979265  | deleted in malignant brain tumors 1    | Dmbt1 | 170568 | 1,07 | down |
| 6542318 | 7037488 | 979275  | deleted in malignant brain tumors 1    | Dmbt1 | 170568 | 1,12 | up   |
| 6557127 | 7037488 | 979256  | deleted in malignant brain tumors 1    | Dmbt1 | 170568 | 1,13 | down |
| 6585866 | 7037488 | 979274  | deleted in malignant brain tumors 1    | Dmbt1 | 170568 | 1,12 | up   |
| 6601647 | 7037488 | 979291  | deleted in malignant brain tumors 1    | Dmbt1 | 170568 | 1,03 | up   |
| 6614095 | 7037488 | 979292  | deleted in malignant brain tumors 1    | Dmbt1 | 170568 | 1,07 | up   |
| 6646326 | 7037488 | 979269  | deleted in malignant brain tumors 1    | Dmbt1 | 170568 | 1,00 | down |
| 6669123 | 7037488 | 979278  | deleted in malignant brain tumors 1    | Dmbt1 | 170568 | 1,52 | down |
| 6705924 | 7037488 | 979259  | deleted in malignant brain tumors 1    | Dmbt1 | 170568 | 1,18 | down |
| 6709701 | 7037488 | 979301  | deleted in malignant brain tumors 1    | Dmbt1 | 170568 | 1,06 | down |
| 6717802 | 7037488 | 979299  | deleted in malignant brain tumors 1    | Dmbt1 | 170568 | 1,08 | up   |
| 6733333 | 7037488 | 979286  | deleted in malignant brain tumors 1    | Dmbt1 | 170568 | 1,07 | down |
| 6742336 | 7037488 | 979302  | deleted in malignant brain tumors 1    | Dmbt1 | 170568 | 1,26 | up   |
| 5757641 | 7364655 | 1780719 | delta/notch-like EGF repeat containing | Dner  | 316573 | 2,43 | up   |
| 5857197 | 7364655 | 1780718 | delta/notch-like EGF repeat containing | Dner  | 316573 | 1,96 | up   |
| 5871292 | 7364655 | 1780711 | delta/notch-like EGF repeat containing | Dner  | 316573 | 1,15 | down |
| 6104608 | 7364655 | 1780714 | delta/notch-like EGF repeat containing | Dner  | 316573 | 1,08 | down |
| 6179867 | 7364655 | 1780715 | delta/notch-like EGF repeat containing | Dner  | 316573 | 1,04 | down |
| 6196129 | 7364655 | 1780716 | delta/notch-like EGF repeat containing | Dner  | 316573 | 1,52 | up   |
| 6459899 | 7364655 | 1780710 | delta/notch-like EGF repeat containing | Dner  | 316573 | 1,35 | up   |
| 6509533 | 7364655 | 1780712 | delta/notch-like EGF repeat containing | Dner  | 316573 | 1,45 | down |
| 6519118 | 7364655 | 1780717 | delta/notch-like EGF repeat containing | Dner  | 316573 | 1,10 | down |
| 6640811 | 7364655 | 1780713 | delta/notch-like EGF repeat containing | Dner  | 316573 | 1,07 | down |
| 5669423 | 7047097 | 1003762 | delta-like 1 (Drosophila)              | Dll1  | 84010  | 1,13 | up   |
| 5766741 | 7047097 | 1003771 | delta-like 1 (Drosophila)              | Dll1  | 84010  | 1,20 | up   |
| 5777791 | 7047097 | 1003770 | delta-like 1 (Drosophila)              | Dll1  | 84010  | 1,23 | down |
| 5780001 | 7047097 | 1003773 | delta-like 1 (Drosophila)              | Dll1  | 84010  | 1,20 | down |
| 5805262 | 7047097 | 1003768 | delta-like 1 (Drosophila)              | Dll1  | 84010  | 1,14 | up   |
| 5872380 | 7047097 | 1003769 | delta-like 1 (Drosophila)              | Dll1  | 84010  | 1,46 | down |
| 6029479 | 7047097 | 1003766 | delta-like 1 (Drosophila)              | Dll1  | 84010  | 2,33 | down |
| 6031908 | 7047097 | 1003765 | delta-like 1 (Drosophila)              | Dll1  | 84010  | 1,82 | up   |
| 6045020 | 7047097 | 1003763 | delta-like 1 (Drosophila)              | Dll1  | 84010  | 1,05 | down |
| 6198945 | 7047097 | 1003773 | delta-like 1 (Drosophila)              | Dll1  | 84010  | 1,42 | down |
| 6235085 | 7047097 | 1003762 | delta-like 1 (Drosophila)              | Dll1  | 84010  | 1,43 | down |
| 6251074 | 7047097 | 1003764 | delta-like 1 (Drosophila)              | Dll1  | 84010  | 1,40 | up   |
| 6463078 | 7047097 | 1003772 | delta-like 1 (Drosophila)              | Dll1  | 84010  | 1,07 | down |
| 6467930 | 7047097 | 1003765 | delta-like 1 (Drosophila)              | Dll1  | 84010  | 1,05 | down |
| 6586859 | 7047097 | 1003767 | delta-like 1 (Drosophila)              | Dll1  | 84010  | 1,09 | up   |
| 5660425 | 7231589 | 1451687 | delta-like 4 (Drosophila)              | Dll4  | 311332 | 1,16 | up   |
| 5968263 | 7231589 | 1451683 | delta-like 4 (Drosophila)              | Dll4  | 311332 | 1,30 | up   |
| 6008218 | 7231589 | 1451691 | delta-like 4 (Drosophila)              | Dll4  | 311332 | 1,02 | up   |
| 6010993 | 7231589 | 1451685 | delta-like 4 (Drosophila)              | Dll4  | 311332 | 1,22 | down |
| 6015275 | 7231589 | 1451690 | delta-like 4 (Drosophila)              | Dll4  | 311332 | 1,77 | up   |
| 6020544 | 7231589 | 1451692 | delta-like 4 (Drosophila)              | Dll4  | 311332 | 1,35 | up   |
| 6189295 | 7231589 | 1451689 | delta-like 4 (Drosophila)              | Dll4  | 311332 | 1,27 | down |
| 6195831 | 7231589 | 1451694 | delta-like 4 (Drosophila)              | Dll4  | 311332 | 1,18 | down |
| 6416470 | 7231589 | 1451689 | delta-like 4 (Drosophila)              | Dll4  | 311332 | 1,22 | up   |
| 6443386 | 7231589 | 1451688 | delta-like 4 (Drosophila)              | Dll4  | 311332 | 1,34 | up   |
| 6462691 | 7231589 | 1451687 | delta-like 4 (Drosophila)              | Dll4  | 311332 | 1,10 | down |
| 6571478 | 7231589 | 1451684 | delta-like 4 (Drosophila)              | Dll4  | 311332 | 2,24 | down |

|         |         |         |                                                              |          |        |      |      |
|---------|---------|---------|--------------------------------------------------------------|----------|--------|------|------|
| 5618622 | 7238115 | 1468558 | DENN/MADD domain containing 1A                               | Dennd1a  | 311913 | 1,27 | up   |
| 5652674 | 7238115 | 1468560 | DENN/MADD domain containing 1A                               | Dennd1a  | 311913 | 1,39 | up   |
| 5654121 | 7238115 | 1468557 | DENN/MADD domain containing 1A                               | Dennd1a  | 311913 | 1,12 | up   |
| 5878815 | 7238115 | 1468557 | DENN/MADD domain containing 1A                               | Dennd1a  | 311913 | 2,11 | down |
| 6118957 | 7238115 | 1468558 | DENN/MADD domain containing 1A                               | Dennd1a  | 311913 | 1,18 | down |
| 6260291 | 7238115 | 1468558 | DENN/MADD domain containing 1A                               | Dennd1a  | 311913 | 1,43 | down |
| 6277382 | 7238115 | 1468558 | DENN/MADD domain containing 1A                               | Dennd1a  | 311913 | 1,13 | down |
| 6457093 | 7238115 | 1468557 | DENN/MADD domain containing 1A                               | Dennd1a  | 311913 | 1,50 | up   |
| 6469535 | 7238115 | 1468558 | DENN/MADD domain containing 1A                               | Dennd1a  | 311913 | 1,42 | up   |
| 6497149 | 7238115 | 1468558 | DENN/MADD domain containing 1A                               | Dennd1a  | 311913 | 1,18 | up   |
| 6723697 | 7238115 | 1468557 | DENN/MADD domain containing 1A                               | Dennd1a  | 311913 | 1,01 | up   |
| 5718833 | 7197820 | 1370092 | DENN/MADD domain containing 2D                               | Dennd2d  | 310772 | 2,11 | up   |
| 5724436 | 7197820 | 1370094 | DENN/MADD domain containing 2D                               | Dennd2d  | 310772 | 1,02 | up   |
| 5856190 | 7197820 | 1370101 | DENN/MADD domain containing 2D                               | Dennd2d  | 310772 | 1,66 | up   |
| 5941428 | 7197820 | 1370088 | DENN/MADD domain containing 2D                               | Dennd2d  | 310772 | 1,11 | down |
| 6044874 | 7197820 | 1370095 | DENN/MADD domain containing 2D                               | Dennd2d  | 310772 | 1,45 | up   |
| 6048553 | 7197820 | 1370095 | DENN/MADD domain containing 2D                               | Dennd2d  | 310772 | 1,11 | up   |
| 6243263 | 7197820 | 1370100 | DENN/MADD domain containing 2D                               | Dennd2d  | 310772 | 1,22 | down |
| 6273129 | 7197820 | 1370091 | DENN/MADD domain containing 2D                               | Dennd2d  | 310772 | 1,71 | up   |
| 6337515 | 7197820 | 1370103 | DENN/MADD domain containing 2D                               | Dennd2d  | 310772 | 1,37 | up   |
| 6372753 | 7197820 | 1370085 | DENN/MADD domain containing 2D                               | Dennd2d  | 310772 | 1,10 | down |
| 6387889 | 7197820 | 1370093 | DENN/MADD domain containing 2D                               | Dennd2d  | 310772 | 2,01 | up   |
| 6604594 | 7197820 | 1370102 | DENN/MADD domain containing 2D                               | Dennd2d  | 310772 | 1,04 | up   |
| 6673039 | 7197820 | 1370090 | DENN/MADD domain containing 2D                               | Dennd2d  | 310772 | 1,19 | up   |
| 5867932 | 7124111 | 1187271 | deoxycytidine kinase                                         | Dck      | 79127  | 1,31 | up   |
| 6131064 | 7124111 | 1187276 | deoxycytidine kinase                                         | Dck      | 79127  | 2,24 | down |
| 6214002 | 7124111 | 1187274 | deoxycytidine kinase                                         | Dck      | 79127  | 1,15 | up   |
| 6336088 | 7124111 | 1187276 | deoxycytidine kinase                                         | Dck      | 79127  | 1,20 | down |
| 6480094 | 7124111 | 1187275 | deoxycytidine kinase                                         | Dck      | 79127  | 1,12 | down |
| 6550412 | 7124111 | 1187273 | deoxycytidine kinase                                         | Dck      | 79127  | 1,35 | up   |
| 6631579 | 7124111 | 1187272 | deoxycytidine kinase                                         | Dck      | 79127  | 1,15 | down |
| 6694605 | 7124111 | 1187270 | deoxycytidine kinase                                         | Dck      | 79127  | 1,27 | up   |
| 5622106 | 7235319 | 1461545 | deoxynucleotidyltransferase, terminal, interacting protein 1 | Dnttip1  | 171437 | 1,02 | down |
| 5651705 | 7235319 | 1461544 | deoxynucleotidyltransferase, terminal, interacting protein 1 | Dnttip1  | 171437 | 1,28 | up   |
| 5740488 | 7235319 | 1461544 | deoxynucleotidyltransferase, terminal, interacting protein 1 | Dnttip1  | 171437 | 2,14 | down |
| 5745074 | 7235319 | 1461541 | deoxynucleotidyltransferase, terminal, interacting protein 1 | Dnttip1  | 171437 | 1,06 | down |
| 5780131 | 7235319 | 1461539 | deoxynucleotidyltransferase, terminal, interacting protein 1 | Dnttip1  | 171437 | 1,01 | down |
| 5995655 | 7235319 | 1461546 | deoxynucleotidyltransferase, terminal, interacting protein 1 | Dnttip1  | 171437 | 1,16 | up   |
| 6006946 | 7235319 | 1461533 | deoxynucleotidyltransferase, terminal, interacting protein 1 | Dnttip1  | 171437 | 1,14 | up   |
| 6140383 | 7235319 | 1461547 | deoxynucleotidyltransferase, terminal, interacting protein 1 | Dnttip1  | 171437 | 1,23 | down |
| 6188980 | 7235319 | 1461542 | deoxynucleotidyltransferase, terminal, interacting protein 1 | Dnttip1  | 171437 | 1,27 | up   |
| 6226141 | 7235319 | 1461535 | deoxynucleotidyltransferase, terminal, interacting protein 1 | Dnttip1  | 171437 | 1,17 | up   |
| 6240465 | 7235319 | 1461537 | deoxynucleotidyltransferase, terminal, interacting protein 1 | Dnttip1  | 171437 | 1,47 | down |
| 6407338 | 7235319 | 1461532 | deoxynucleotidyltransferase, terminal, interacting protein 1 | Dnttip1  | 171437 | 1,17 | up   |
| 6465808 | 7235319 | 1461538 | deoxynucleotidyltransferase, terminal, interacting protein 1 | Dnttip1  | 171437 | 1,39 | up   |
| 6490717 | 7235319 | 1461540 | deoxynucleotidyltransferase, terminal, interacting protein 1 | Dnttip1  | 171437 | 1,02 | up   |
| 6497092 | 7235319 | 1461534 | deoxynucleotidyltransferase, terminal, interacting protein 1 | Dnttip1  | 171437 | 1,04 | down |
| 6543726 | 7235319 | 1461534 | deoxynucleotidyltransferase, terminal, interacting protein 1 | Dnttip1  | 171437 | 1,15 | up   |
| 6569109 | 7235319 | 1461543 | deoxynucleotidyltransferase, terminal, interacting protein 1 | Dnttip1  | 171437 | 1,03 | down |
| 6713573 | 7235319 | 1461536 | deoxynucleotidyltransferase, terminal, interacting protein 1 | Dnttip1  | 171437 | 1,26 | down |
| 5624930 | 7378634 | 1817780 | deoxyribonuclease 1-like 1                                   | Dnase111 | 363522 | 1,38 | down |
| 5951640 | 7378634 | 1817779 | deoxyribonuclease 1-like 1                                   | Dnase111 | 363522 | 1,02 | up   |
| 5994163 | 7378634 | 1817775 | deoxyribonuclease 1-like 1                                   | Dnase111 | 363522 | 1,17 | up   |
| 6079916 | 7378634 | 1817781 | deoxyribonuclease 1-like 1                                   | Dnase111 | 363522 | 1,01 | up   |
| 6132287 | 7378634 | 1817776 | deoxyribonuclease 1-like 1                                   | Dnase111 | 363522 | 1,13 | up   |
| 6142374 | 7378634 | 1817777 | deoxyribonuclease 1-like 1                                   | Dnase111 | 363522 | 1,40 | up   |

|         |         |         |                                       |          |        |      |      |
|---------|---------|---------|---------------------------------------|----------|--------|------|------|
| 6209837 | 7378634 | 1817780 | deoxyribonuclease 1-like 1            | Dnase111 | 363522 | 1,19 | down |
| 6500813 | 7378634 | 1817778 | deoxyribonuclease 1-like 1            | Dnase111 | 363522 | 2,02 | down |
| 6566969 | 7378634 | 1817780 | deoxyribonuclease 1-like 1            | Dnase111 | 363522 | 1,68 | down |
| 6600861 | 7378634 | 1817775 | deoxyribonuclease 1-like 1            | Dnase111 | 363522 | 1,14 | down |
| 6640990 | 7378634 | 1817780 | deoxyribonuclease 1-like 1            | Dnase111 | 363522 | 1,32 | down |
| 6676613 | 7378634 | 1817780 | deoxyribonuclease 1-like 1            | Dnase111 | 363522 | 1,30 | down |
| 5685682 | 7074943 | 1068287 | deoxyribonuclease I                   | Dnase1   | 25633  | 1,29 | down |
| 5699193 | 7074943 | 1068282 | deoxyribonuclease I                   | Dnase1   | 25633  | 1,11 | down |
| 5715048 | 7074943 | 1068280 | deoxyribonuclease I                   | Dnase1   | 25633  | 1,36 | down |
| 5860077 | 7074943 | 1068280 | deoxyribonuclease I                   | Dnase1   | 25633  | 2,02 | down |
| 5895315 | 7074943 | 1068282 | deoxyribonuclease I                   | Dnase1   | 25633  | 1,40 | up   |
| 5915629 | 7074943 | 1068286 | deoxyribonuclease I                   | Dnase1   | 25633  | 1,00 | down |
| 6066555 | 7074943 | 1068288 | deoxyribonuclease I                   | Dnase1   | 25633  | 1,03 | up   |
| 6093203 | 7074943 | 1068288 | deoxyribonuclease I                   | Dnase1   | 25633  | 1,02 | down |
| 6372921 | 7074943 | 1068285 | deoxyribonuclease I                   | Dnase1   | 25633  | 1,05 | up   |
| 6380886 | 7074943 | 1068283 | deoxyribonuclease I                   | Dnase1   | 25633  | 1,03 | down |
| 6460148 | 7074943 | 1068281 | deoxyribonuclease I                   | Dnase1   | 25633  | 1,24 | up   |
| 6686785 | 7074943 | 1068284 | deoxyribonuclease I                   | Dnase1   | 25633  | 1,03 | up   |
| 6689925 | 7074943 | 1068287 | deoxyribonuclease I                   | Dnase1   | 25633  | 1,09 | down |
| 5712157 | 7331237 | 1698716 | developing brain homeobox 2           | Dbx2     | 541457 | 2,05 | down |
| 5799068 | 7331237 | 1698714 | developing brain homeobox 2           | Dbx2     | 541457 | 1,07 | down |
| 5925001 | 7331237 | 1698713 | developing brain homeobox 2           | Dbx2     | 541457 | 1,07 | down |
| 5976138 | 7331237 | 1698714 | developing brain homeobox 2           | Dbx2     | 541457 | 1,64 | down |
| 6485515 | 7331237 | 1698713 | developing brain homeobox 2           | Dbx2     | 541457 | 1,04 | down |
| 5718570 | 7100396 | 1128562 | diacylglycerol lipase, beta           | Daglb    | 304289 | 1,69 | up   |
| 5836570 | 7100396 | 1128561 | diacylglycerol lipase, beta           | Daglb    | 304289 | 1,81 | up   |
| 5858593 | 7100396 | 1128561 | diacylglycerol lipase, beta           | Daglb    | 304289 | 1,03 | down |
| 5874708 | 7100396 | 1128572 | diacylglycerol lipase, beta           | Daglb    | 304289 | 1,13 | up   |
| 5874967 | 7100396 | 1128564 | diacylglycerol lipase, beta           | Daglb    | 304289 | 1,24 | down |
| 5878624 | 7100396 | 1128576 | diacylglycerol lipase, beta           | Daglb    | 304289 | 1,47 | down |
| 5934805 | 7100396 | 1128578 | diacylglycerol lipase, beta           | Daglb    | 304289 | 1,01 | down |
| 6008373 | 7100396 | 1128567 | diacylglycerol lipase, beta           | Daglb    | 304289 | 1,37 | down |
| 6013555 | 7100396 | 1128563 | diacylglycerol lipase, beta           | Daglb    | 304289 | 1,29 | up   |
| 6072691 | 7100396 | 1128564 | diacylglycerol lipase, beta           | Daglb    | 304289 | 1,05 | down |
| 6073223 | 7100396 | 1128568 | diacylglycerol lipase, beta           | Daglb    | 304289 | 2,01 | down |
| 6172844 | 7100396 | 1128574 | diacylglycerol lipase, beta           | Daglb    | 304289 | 1,15 | up   |
| 6207819 | 7100396 | 1128578 | diacylglycerol lipase, beta           | Daglb    | 304289 | 1,75 | up   |
| 6211059 | 7100396 | 1128571 | diacylglycerol lipase, beta           | Daglb    | 304289 | 1,06 | up   |
| 6252587 | 7100396 | 1128575 | diacylglycerol lipase, beta           | Daglb    | 304289 | 1,05 | down |
| 6290900 | 7100396 | 1128573 | diacylglycerol lipase, beta           | Daglb    | 304289 | 1,01 | up   |
| 6294116 | 7100396 | 1128577 | diacylglycerol lipase, beta           | Daglb    | 304289 | 1,18 | down |
| 6453637 | 7100396 | 1128563 | diacylglycerol lipase, beta           | Daglb    | 304289 | 1,13 | up   |
| 6494071 | 7100396 | 1128578 | diacylglycerol lipase, beta           | Daglb    | 304289 | 1,30 | down |
| 6508236 | 7100396 | 1128577 | diacylglycerol lipase, beta           | Daglb    | 304289 | 1,31 | down |
| 6527894 | 7100396 | 1128570 | diacylglycerol lipase, beta           | Daglb    | 304289 | 1,58 | down |
| 6533778 | 7100396 | 1128565 | diacylglycerol lipase, beta           | Daglb    | 304289 | 1,03 | up   |
| 6697262 | 7100396 | 1128566 | diacylglycerol lipase, beta           | Daglb    | 304289 | 1,04 | up   |
| 5967807 | 7376820 | 1813440 | diaphanous homolog 2 (Drosophila)     | Diaph2   | 317189 | 1,10 | down |
| 6427008 | 7376820 | 1813434 | diaphanous homolog 2 (Drosophila)     | Diaph2   | 317189 | 1,17 | down |
| 6483803 | 7376820 | 1813416 | diaphanous homolog 2 (Drosophila)     | Diaph2   | 317189 | 1,27 | down |
| 5697102 | 7290172 | 1597110 | diencephalon/mesencephalon homeobox 1 | Dmbx1    | 313512 | 1,15 | down |
| 5706173 | 7290172 | 1597114 | diencephalon/mesencephalon homeobox 1 | Dmbx1    | 313512 | 2,40 | up   |
| 5860625 | 7290172 | 1597108 | diencephalon/mesencephalon homeobox 1 | Dmbx1    | 313512 | 1,42 | down |
| 5899512 | 7290172 | 1597112 | diencephalon/mesencephalon homeobox 1 | Dmbx1    | 313512 | 1,27 | up   |
| 6004478 | 7290172 | 1597112 | diencephalon/mesencephalon homeobox 1 | Dmbx1    | 313512 | 1,09 | up   |
| 6163667 | 7290172 | 1597107 | diencephalon/mesencephalon homeobox 1 | Dmbx1    | 313512 | 1,11 | up   |



|         |         |         |                                       |           |        |      |      |
|---------|---------|---------|---------------------------------------|-----------|--------|------|------|
| 6167079 | 7290172 | 1597112 | diencephalon/mesencephalon homeobox 1 | Dmbx1     | 313512 | 1,02 | down |
| 6195936 | 7290172 | 1597115 | diencephalon/mesencephalon homeobox 1 | Dmbx1     | 313512 | 1,08 | up   |
| 6297694 | 7290172 | 1597113 | diencephalon/mesencephalon homeobox 1 | Dmbx1     | 313512 | 1,02 | down |
| 6361533 | 7290172 | 1597112 | diencephalon/mesencephalon homeobox 1 | Dmbx1     | 313512 | 1,06 | down |
| 6489935 | 7290172 | 1597115 | diencephalon/mesencephalon homeobox 1 | Dmbx1     | 313512 | 1,06 | up   |
| 6599136 | 7290172 | 1597109 | diencephalon/mesencephalon homeobox 1 | Dmbx1     | 313512 | 1,19 | down |
| 6631598 | 7290172 | 1597112 | diencephalon/mesencephalon homeobox 1 | Dmbx1     | 313512 | 1,36 | down |
| 6663858 | 7290172 | 1597111 | diencephalon/mesencephalon homeobox 1 | Dmbx1     | 313512 | 1,29 | down |
| 6666691 | 7290172 | 1597116 | diencephalon/mesencephalon homeobox 1 | Dmbx1     | 313512 | 1,19 | up   |
| 5705556 | 7345462 | 1733816 | dihydroliipoamide S-acetyltransferase | Dlat      | 81654  | 1,04 | up   |
| 5879359 | 7345462 | 1733811 | dihydroliipoamide S-acetyltransferase | Dlat      | 81654  | 1,07 | down |
| 5903492 | 7345462 | 1733800 | dihydroliipoamide S-acetyltransferase | Dlat      | 81654  | 1,73 | up   |
| 5910590 | 7345462 | 1733813 | dihydroliipoamide S-acetyltransferase | Dlat      | 81654  | 1,19 | down |
| 5988442 | 7345462 | 1733816 | dihydroliipoamide S-acetyltransferase | Dlat      | 81654  | 1,27 | up   |
| 6073153 | 7345462 | 1733804 | dihydroliipoamide S-acetyltransferase | Dlat      | 81654  | 1,14 | down |
| 6134185 | 7345462 | 1733803 | dihydroliipoamide S-acetyltransferase | Dlat      | 81654  | 1,72 | down |
| 6171806 | 7345462 | 1733812 | dihydroliipoamide S-acetyltransferase | Dlat      | 81654  | 1,28 | down |
| 6336649 | 7345462 | 1733801 | dihydroliipoamide S-acetyltransferase | Dlat      | 81654  | 1,22 | down |
| 6350530 | 7345462 | 1733815 | dihydroliipoamide S-acetyltransferase | Dlat      | 81654  | 1,28 | up   |
| 6373152 | 7345462 | 1733802 | dihydroliipoamide S-acetyltransferase | Dlat      | 81654  | 1,01 | down |
| 6389114 | 7345462 | 1733799 | dihydroliipoamide S-acetyltransferase | Dlat      | 81654  | 1,60 | down |
| 6408896 | 7345462 | 1733810 | dihydroliipoamide S-acetyltransferase | Dlat      | 81654  | 1,08 | down |
| 6447856 | 7345462 | 1733816 | dihydroliipoamide S-acetyltransferase | Dlat      | 81654  | 1,06 | up   |
| 6490142 | 7345462 | 1733816 | dihydroliipoamide S-acetyltransferase | Dlat      | 81654  | 1,10 | up   |
| 6511269 | 7345462 | 1733807 | dihydroliipoamide S-acetyltransferase | Dlat      | 81654  | 2,29 | up   |
| 6630478 | 7345462 | 1733811 | dihydroliipoamide S-acetyltransferase | Dlat      | 81654  | 1,17 | up   |
| 6648503 | 7345462 | 1733808 | dihydroliipoamide S-acetyltransferase | Dlat      | 81654  | 1,05 | down |
| 6669940 | 7345462 | 1733814 | dihydroliipoamide S-acetyltransferase | Dlat      | 81654  | 1,07 | up   |
| 6676409 | 7345462 | 1733806 | dihydroliipoamide S-acetyltransferase | Dlat      | 81654  | 1,05 | down |
| 5618812 | 7196187 | 1365986 | Dingo protein                         | LOC499653 | 499653 | 1,31 | up   |
| 5634713 | 7196187 | 1365990 | Dingo protein                         | LOC499653 | 499653 | 1,38 | down |
| 5697261 | 7196187 | 1365988 | Dingo protein                         | LOC499653 | 499653 | 2,19 | down |
| 5702379 | 7196187 | 1365957 | Dingo protein                         | LOC499653 | 499653 | 2,01 | down |
| 5705457 | 7196187 | 1365960 | Dingo protein                         | LOC499653 | 499653 | 1,39 | up   |
| 5787169 | 7196187 | 1365988 | Dingo protein                         | LOC499653 | 499653 | 1,11 | down |
| 5796314 | 7196187 | 1365976 | Dingo protein                         | LOC499653 | 499653 | 1,27 | down |
| 5801539 | 7196187 | 1365954 | Dingo protein                         | LOC499653 | 499653 | 1,27 | up   |
| 5850776 | 7196187 | 1365978 | Dingo protein                         | LOC499653 | 499653 | 1,04 | up   |
| 5944011 | 7196187 | 1365978 | Dingo protein                         | LOC499653 | 499653 | 1,10 | up   |
| 5988035 | 7196187 | 1365989 | Dingo protein                         | LOC499653 | 499653 | 1,09 | up   |
| 5988393 | 7196187 | 1365966 | Dingo protein                         | LOC499653 | 499653 | 1,37 | up   |
| 5994131 | 7196187 | 1365988 | Dingo protein                         | LOC499653 | 499653 | 1,35 | down |
| 6012934 | 7196187 | 1365953 | Dingo protein                         | LOC499653 | 499653 | 1,10 | down |
| 6057975 | 7196187 | 1365979 | Dingo protein                         | LOC499653 | 499653 | 1,03 | up   |
| 6075212 | 7196187 | 1365982 | Dingo protein                         | LOC499653 | 499653 | 1,24 | up   |
| 6112453 | 7196187 | 1365974 | Dingo protein                         | LOC499653 | 499653 | 1,09 | down |
| 6140082 | 7196187 | 1365981 | Dingo protein                         | LOC499653 | 499653 | 1,30 | down |
| 6160785 | 7196187 | 1365962 | Dingo protein                         | LOC499653 | 499653 | 1,01 | up   |
| 6180703 | 7196187 | 1365972 | Dingo protein                         | LOC499653 | 499653 | 1,03 | down |
| 6219148 | 7196187 | 1365983 | Dingo protein                         | LOC499653 | 499653 | 1,03 | down |
| 6225410 | 7196187 | 1365965 | Dingo protein                         | LOC499653 | 499653 | 1,03 | down |
| 6230322 | 7196187 | 1365954 | Dingo protein                         | LOC499653 | 499653 | 1,34 | down |
| 6247015 | 7196187 | 1365985 | Dingo protein                         | LOC499653 | 499653 | 1,22 | down |
| 6272877 | 7196187 | 1365980 | Dingo protein                         | LOC499653 | 499653 | 1,12 | up   |
| 6305887 | 7196187 | 1365953 | Dingo protein                         | LOC499653 | 499653 | 1,04 | down |
| 6358177 | 7196187 | 1365988 | Dingo protein                         | LOC499653 | 499653 | 1,13 | down |

|         |         |         |                                                                                                                         |           |        |      |      |
|---------|---------|---------|-------------------------------------------------------------------------------------------------------------------------|-----------|--------|------|------|
| 6364769 | 7196187 | 1365959 | Dingo protein                                                                                                           | LOC499653 | 499653 | 1,01 | up   |
| 6368139 | 7196187 | 1365970 | Dingo protein                                                                                                           | LOC499653 | 499653 | 1,60 | up   |
| 6388733 | 7196187 | 1365971 | Dingo protein                                                                                                           | LOC499653 | 499653 | 1,31 | up   |
| 6422387 | 7196187 | 1365965 | Dingo protein                                                                                                           | LOC499653 | 499653 | 1,02 | up   |
| 6462208 | 7196187 | 1365975 | Dingo protein                                                                                                           | LOC499653 | 499653 | 1,26 | down |
| 6471253 | 7196187 | 1365958 | Dingo protein                                                                                                           | LOC499653 | 499653 | 1,31 | down |
| 6566511 | 7196187 | 1365967 | Dingo protein                                                                                                           | LOC499653 | 499653 | 1,05 | down |
| 6567221 | 7196187 | 1365987 | Dingo protein                                                                                                           | LOC499653 | 499653 | 1,43 | up   |
| 6569301 | 7196187 | 1365984 | Dingo protein                                                                                                           | LOC499653 | 499653 | 1,66 | down |
| 6576128 | 7196187 | 1365988 | Dingo protein                                                                                                           | LOC499653 | 499653 | 1,30 | up   |
| 6624434 | 7196187 | 1365977 | Dingo protein                                                                                                           | LOC499653 | 499653 | 1,16 | up   |
| 6680711 | 7196187 | 1365970 | Dingo protein                                                                                                           | LOC499653 | 499653 | 1,20 | down |
| 6686856 | 7196187 | 1365963 | Dingo protein                                                                                                           | LOC499653 | 499653 | 1,35 | up   |
| 6714070 | 7196187 | 1365973 | Dingo protein                                                                                                           | LOC499653 | 499653 | 1,18 | down |
| 6715109 | 7196187 | 1365961 | Dingo protein                                                                                                           | LOC499653 | 499653 | 1,36 | up   |
| 6729307 | 7196187 | 1365957 | Dingo protein                                                                                                           | LOC499653 | 499653 | 1,33 | down |
| 5727181 | 7217747 | 1417512 | DIP2 disco-interacting protein 2 homolog A (Drosophila) /// similar to Disco-interDip2a /// LOC68768: 690211 /// 687682 |           |        | 1,04 | down |
| 6131700 | 7217747 | 1417466 | DIP2 disco-interacting protein 2 homolog A (Drosophila) /// similar to Disco-interDip2a /// LOC68768: 690211 /// 687682 |           |        | 1,14 | down |
| 5700078 | 7185021 | 1337940 | dipeptidase 3                                                                                                           | Dpep3     | 364994 | 1,40 | down |
| 5717527 | 7185021 | 1337946 | dipeptidase 3                                                                                                           | Dpep3     | 364994 | 1,01 | down |
| 5802528 | 7185021 | 1337946 | dipeptidase 3                                                                                                           | Dpep3     | 364994 | 1,09 | down |
| 5823300 | 7185021 | 1337941 | dipeptidase 3                                                                                                           | Dpep3     | 364994 | 1,77 | down |
| 5888140 | 7185021 | 1337937 | dipeptidase 3                                                                                                           | Dpep3     | 364994 | 1,01 | down |
| 5916091 | 7185021 | 1337946 | dipeptidase 3                                                                                                           | Dpep3     | 364994 | 1,31 | up   |
| 5928869 | 7185021 | 1337938 | dipeptidase 3                                                                                                           | Dpep3     | 364994 | 1,45 | up   |
| 5939301 | 7185021 | 1337939 | dipeptidase 3                                                                                                           | Dpep3     | 364994 | 1,20 | up   |
| 6008388 | 7185021 | 1337937 | dipeptidase 3                                                                                                           | Dpep3     | 364994 | 1,83 | down |
| 6104318 | 7185021 | 1337936 | dipeptidase 3                                                                                                           | Dpep3     | 364994 | 1,03 | down |
| 6333828 | 7185021 | 1337946 | dipeptidase 3                                                                                                           | Dpep3     | 364994 | 2,51 | up   |
| 6352778 | 7185021 | 1337944 | dipeptidase 3                                                                                                           | Dpep3     | 364994 | 1,14 | down |
| 6382012 | 7185021 | 1337942 | dipeptidase 3                                                                                                           | Dpep3     | 364994 | 1,02 | down |
| 6431978 | 7185021 | 1337937 | dipeptidase 3                                                                                                           | Dpep3     | 364994 | 1,39 | down |
| 6532570 | 7185021 | 1337943 | dipeptidase 3                                                                                                           | Dpep3     | 364994 | 1,08 | down |
| 6614721 | 7185021 | 1337945 | dipeptidase 3                                                                                                           | Dpep3     | 364994 | 1,14 | down |
| 5676712 | 7367994 | 1789236 | dipeptidyl peptidase 9                                                                                                  | Dpp9      | 301130 | 2,36 | up   |
| 5864317 | 7367994 | 1789265 | dipeptidyl peptidase 9                                                                                                  | Dpp9      | 301130 | 1,05 | up   |
| 5994381 | 7367994 | 1789258 | dipeptidyl peptidase 9                                                                                                  | Dpp9      | 301130 | 1,04 | up   |
| 6040212 | 7367994 | 1789253 | dipeptidyl peptidase 9                                                                                                  | Dpp9      | 301130 | 1,20 | down |
| 6052098 | 7367994 | 1789246 | dipeptidyl peptidase 9                                                                                                  | Dpp9      | 301130 | 1,07 | up   |
| 6107182 | 7367994 | 1789240 | dipeptidyl peptidase 9                                                                                                  | Dpp9      | 301130 | 1,06 | up   |
| 6196939 | 7367994 | 1789252 | dipeptidyl peptidase 9                                                                                                  | Dpp9      | 301130 | 1,05 | down |
| 6237473 | 7367994 | 1789237 | dipeptidyl peptidase 9                                                                                                  | Dpp9      | 301130 | 1,09 | down |
| 6256375 | 7367994 | 1789264 | dipeptidyl peptidase 9                                                                                                  | Dpp9      | 301130 | 1,11 | down |
| 6290056 | 7367994 | 1789254 | dipeptidyl peptidase 9                                                                                                  | Dpp9      | 301130 | 1,06 | down |
| 6305923 | 7367994 | 1789262 | dipeptidyl peptidase 9                                                                                                  | Dpp9      | 301130 | 1,00 | up   |
| 6314083 | 7367994 | 1789261 | dipeptidyl peptidase 9                                                                                                  | Dpp9      | 301130 | 1,16 | down |
| 6316624 | 7367994 | 1789257 | dipeptidyl peptidase 9                                                                                                  | Dpp9      | 301130 | 1,01 | down |
| 6350545 | 7367994 | 1789259 | dipeptidyl peptidase 9                                                                                                  | Dpp9      | 301130 | 1,00 | down |
| 6404281 | 7367994 | 1789250 | dipeptidyl peptidase 9                                                                                                  | Dpp9      | 301130 | 1,13 | down |
| 6450064 | 7367994 | 1789247 | dipeptidyl peptidase 9                                                                                                  | Dpp9      | 301130 | 1,12 | up   |
| 6461085 | 7367994 | 1789260 | dipeptidyl peptidase 9                                                                                                  | Dpp9      | 301130 | 1,19 | down |
| 6473119 | 7367994 | 1789248 | dipeptidyl peptidase 9                                                                                                  | Dpp9      | 301130 | 1,07 | down |
| 6478190 | 7367994 | 1789266 | dipeptidyl peptidase 9                                                                                                  | Dpp9      | 301130 | 1,22 | down |
| 6519986 | 7367994 | 1789247 | dipeptidyl peptidase 9                                                                                                  | Dpp9      | 301130 | 1,04 | down |
| 6600825 | 7367994 | 1789249 | dipeptidyl peptidase 9                                                                                                  | Dpp9      | 301130 | 1,17 | up   |
| 5656775 | 7110544 | 1153434 | dipeptidylpeptidase 10                                                                                                  | Dpp10     | 363972 | 1,20 | down |

|         |         |         |                        |       |        |      |      |
|---------|---------|---------|------------------------|-------|--------|------|------|
| 5681502 | 7110544 | 1153440 | dipeptidylpeptidase 10 | Dpp10 | 363972 | 1,23 | up   |
| 5738581 | 7110544 | 1153423 | dipeptidylpeptidase 10 | Dpp10 | 363972 | 1,24 | up   |
| 5808966 | 7110544 | 1153430 | dipeptidylpeptidase 10 | Dpp10 | 363972 | 1,52 | down |
| 5829355 | 7110544 | 1153438 | dipeptidylpeptidase 10 | Dpp10 | 363972 | 2,09 | up   |
| 5850663 | 7110544 | 1153421 | dipeptidylpeptidase 10 | Dpp10 | 363972 | 1,41 | up   |
| 5876764 | 7110544 | 1153427 | dipeptidylpeptidase 10 | Dpp10 | 363972 | 1,49 | down |
| 5931635 | 7110544 | 1153426 | dipeptidylpeptidase 10 | Dpp10 | 363972 | 1,45 | down |
| 6096519 | 7110544 | 1153432 | dipeptidylpeptidase 10 | Dpp10 | 363972 | 2,24 | up   |
| 6100481 | 7110544 | 1153431 | dipeptidylpeptidase 10 | Dpp10 | 363972 | 1,64 | down |
| 6158995 | 7110544 | 1153436 | dipeptidylpeptidase 10 | Dpp10 | 363972 | 1,25 | down |
| 6164646 | 7110544 | 1153424 | dipeptidylpeptidase 10 | Dpp10 | 363972 | 1,62 | down |
| 6295263 | 7110544 | 1153442 | dipeptidylpeptidase 10 | Dpp10 | 363972 | 2,20 | up   |
| 6332293 | 7110544 | 1153429 | dipeptidylpeptidase 10 | Dpp10 | 363972 | 1,39 | up   |
| 6384461 | 7110544 | 1153425 | dipeptidylpeptidase 10 | Dpp10 | 363972 | 1,46 | down |
| 6393140 | 7110544 | 1153428 | dipeptidylpeptidase 10 | Dpp10 | 363972 | 1,61 | down |
| 6530056 | 7110544 | 1153441 | dipeptidylpeptidase 10 | Dpp10 | 363972 | 1,90 | up   |
| 6551339 | 7110544 | 1153426 | dipeptidylpeptidase 10 | Dpp10 | 363972 | 1,22 | down |
| 6559132 | 7110544 | 1153437 | dipeptidylpeptidase 10 | Dpp10 | 363972 | 1,63 | down |
| 6572553 | 7110544 | 1153435 | dipeptidylpeptidase 10 | Dpp10 | 363972 | 1,14 | up   |
| 6603198 | 7110544 | 1153437 | dipeptidylpeptidase 10 | Dpp10 | 363972 | 2,89 | up   |
| 6625826 | 7110544 | 1153420 | dipeptidylpeptidase 10 | Dpp10 | 363972 | 1,57 | down |
| 6689335 | 7110544 | 1153433 | dipeptidylpeptidase 10 | Dpp10 | 363972 | 1,01 | up   |
| 6698443 | 7110544 | 1153439 | dipeptidylpeptidase 10 | Dpp10 | 363972 | 1,59 | down |
| 6732419 | 7110544 | 1153422 | dipeptidylpeptidase 10 | Dpp10 | 363972 | 1,58 | down |
| 5644388 | 7239509 | 1472532 | dipeptidylpeptidase 4  | Dpp4  | 25253  | 1,00 | up   |
| 5696029 | 7239509 | 1472544 | dipeptidylpeptidase 4  | Dpp4  | 25253  | 1,02 | up   |
| 5708705 | 7239509 | 1472546 | dipeptidylpeptidase 4  | Dpp4  | 25253  | 1,00 | down |
| 5749938 | 7239509 | 1472552 | dipeptidylpeptidase 4  | Dpp4  | 25253  | 1,06 | up   |
| 5779380 | 7239509 | 1472553 | dipeptidylpeptidase 4  | Dpp4  | 25253  | 1,14 | down |
| 5850383 | 7239509 | 1472547 | dipeptidylpeptidase 4  | Dpp4  | 25253  | 1,03 | up   |
| 5868854 | 7239509 | 1472542 | dipeptidylpeptidase 4  | Dpp4  | 25253  | 1,06 | down |
| 5875780 | 7239509 | 1472551 | dipeptidylpeptidase 4  | Dpp4  | 25253  | 1,16 | down |
| 5906046 | 7239509 | 1472540 | dipeptidylpeptidase 4  | Dpp4  | 25253  | 1,07 | down |
| 5924377 | 7239509 | 1472550 | dipeptidylpeptidase 4  | Dpp4  | 25253  | 1,00 | up   |
| 5936507 | 7239509 | 1472534 | dipeptidylpeptidase 4  | Dpp4  | 25253  | 1,02 | up   |
| 5956312 | 7239509 | 1472539 | dipeptidylpeptidase 4  | Dpp4  | 25253  | 1,28 | down |
| 6014475 | 7239509 | 1472548 | dipeptidylpeptidase 4  | Dpp4  | 25253  | 1,00 | down |
| 6065981 | 7239509 | 1472535 | dipeptidylpeptidase 4  | Dpp4  | 25253  | 1,41 | up   |
| 6139050 | 7239509 | 1472545 | dipeptidylpeptidase 4  | Dpp4  | 25253  | 1,04 | up   |
| 6214358 | 7239509 | 1472536 | dipeptidylpeptidase 4  | Dpp4  | 25253  | 1,02 | up   |
| 6280192 | 7239509 | 1472549 | dipeptidylpeptidase 4  | Dpp4  | 25253  | 1,04 | up   |
| 6280260 | 7239509 | 1472554 | dipeptidylpeptidase 4  | Dpp4  | 25253  | 1,01 | up   |
| 6336252 | 7239509 | 1472555 | dipeptidylpeptidase 4  | Dpp4  | 25253  | 1,16 | down |
| 6340060 | 7239509 | 1472547 | dipeptidylpeptidase 4  | Dpp4  | 25253  | 1,17 | down |
| 6409894 | 7239509 | 1472556 | dipeptidylpeptidase 4  | Dpp4  | 25253  | 1,10 | down |
| 6484791 | 7239509 | 1472537 | dipeptidylpeptidase 4  | Dpp4  | 25253  | 2,03 | down |
| 6496641 | 7239509 | 1472530 | dipeptidylpeptidase 4  | Dpp4  | 25253  | 1,02 | down |
| 6551865 | 7239509 | 1472538 | dipeptidylpeptidase 4  | Dpp4  | 25253  | 1,19 | up   |
| 6555083 | 7239509 | 1472531 | dipeptidylpeptidase 4  | Dpp4  | 25253  | 1,01 | up   |
| 6609982 | 7239509 | 1472543 | dipeptidylpeptidase 4  | Dpp4  | 25253  | 1,77 | up   |
| 6697169 | 7239509 | 1472533 | dipeptidylpeptidase 4  | Dpp4  | 25253  | 1,03 | up   |
| 6697355 | 7239509 | 1472541 | dipeptidylpeptidase 4  | Dpp4  | 25253  | 1,13 | up   |
| 6727963 | 7239509 | 1472532 | dipeptidylpeptidase 4  | Dpp4  | 25253  | 1,00 | up   |
| 5674446 | 7260307 | 1523400 | dipeptidylpeptidase 6  | Dpp6  | 29272  | 1,23 | down |
| 5787741 | 7260307 | 1523417 | dipeptidylpeptidase 6  | Dpp6  | 29272  | 1,43 | up   |
| 5793799 | 7260307 | 1523404 | dipeptidylpeptidase 6  | Dpp6  | 29272  | 1,19 | up   |

|         |         |         |                                     |      |        |      |      |
|---------|---------|---------|-------------------------------------|------|--------|------|------|
| 5794592 | 7260307 | 1523395 | dipeptidylpeptidase 6               | Dpp6 | 29272  | 1,25 | down |
| 5838017 | 7260307 | 1523401 | dipeptidylpeptidase 6               | Dpp6 | 29272  | 1,14 | up   |
| 5868487 | 7260307 | 1523405 | dipeptidylpeptidase 6               | Dpp6 | 29272  | 1,38 | down |
| 5870852 | 7260307 | 1523414 | dipeptidylpeptidase 6               | Dpp6 | 29272  | 1,02 | down |
| 5948572 | 7260307 | 1523396 | dipeptidylpeptidase 6               | Dpp6 | 29272  | 1,09 | up   |
| 5961961 | 7260307 | 1523408 | dipeptidylpeptidase 6               | Dpp6 | 29272  | 1,22 | up   |
| 6055158 | 7260307 | 1523399 | dipeptidylpeptidase 6               | Dpp6 | 29272  | 1,04 | down |
| 6063996 | 7260307 | 1523406 | dipeptidylpeptidase 6               | Dpp6 | 29272  | 1,12 | down |
| 6100361 | 7260307 | 1523393 | dipeptidylpeptidase 6               | Dpp6 | 29272  | 1,29 | down |
| 6172139 | 7260307 | 1523407 | dipeptidylpeptidase 6               | Dpp6 | 29272  | 1,67 | up   |
| 6181567 | 7260307 | 1523412 | dipeptidylpeptidase 6               | Dpp6 | 29272  | 1,46 | down |
| 6293548 | 7260307 | 1523409 | dipeptidylpeptidase 6               | Dpp6 | 29272  | 1,45 | down |
| 6294171 | 7260307 | 1523419 | dipeptidylpeptidase 6               | Dpp6 | 29272  | 2,10 | up   |
| 6334152 | 7260307 | 1523398 | dipeptidylpeptidase 6               | Dpp6 | 29272  | 1,00 | up   |
| 6361411 | 7260307 | 1523419 | dipeptidylpeptidase 6               | Dpp6 | 29272  | 1,52 | up   |
| 6375571 | 7260307 | 1523411 | dipeptidylpeptidase 6               | Dpp6 | 29272  | 1,45 | up   |
| 6381779 | 7260307 | 1523418 | dipeptidylpeptidase 6               | Dpp6 | 29272  | 1,19 | up   |
| 6392588 | 7260307 | 1523413 | dipeptidylpeptidase 6               | Dpp6 | 29272  | 1,11 | down |
| 6412427 | 7260307 | 1523403 | dipeptidylpeptidase 6               | Dpp6 | 29272  | 1,14 | up   |
| 6461473 | 7260307 | 1523415 | dipeptidylpeptidase 6               | Dpp6 | 29272  | 1,08 | up   |
| 6463236 | 7260307 | 1523394 | dipeptidylpeptidase 6               | Dpp6 | 29272  | 1,33 | down |
| 6545474 | 7260307 | 1523416 | dipeptidylpeptidase 6               | Dpp6 | 29272  | 1,38 | up   |
| 6610818 | 7260307 | 1523410 | dipeptidylpeptidase 6               | Dpp6 | 29272  | 1,35 | up   |
| 6662810 | 7260307 | 1523402 | dipeptidylpeptidase 6               | Dpp6 | 29272  | 1,02 | up   |
| 6678400 | 7260307 | 1523397 | dipeptidylpeptidase 6               | Dpp6 | 29272  | 1,58 | up   |
| 5722378 | 7277904 | 1567786 | disabled homolog 1 (Drosophila)     | Dab1 | 266729 | 1,50 | up   |
| 5730790 | 7277904 | 1567794 | disabled homolog 1 (Drosophila)     | Dab1 | 266729 | 1,13 | down |
| 5860105 | 7277904 | 1567794 | disabled homolog 1 (Drosophila)     | Dab1 | 266729 | 3,70 | up   |
| 5954445 | 7277904 | 1567793 | disabled homolog 1 (Drosophila)     | Dab1 | 266729 | 1,03 | down |
| 5991473 | 7277904 | 1567791 | disabled homolog 1 (Drosophila)     | Dab1 | 266729 | 1,04 | up   |
| 6067648 | 7277904 | 1567796 | disabled homolog 1 (Drosophila)     | Dab1 | 266729 | 1,06 | down |
| 6085891 | 7277904 | 1567788 | disabled homolog 1 (Drosophila)     | Dab1 | 266729 | 1,03 | up   |
| 6188859 | 7277904 | 1567789 | disabled homolog 1 (Drosophila)     | Dab1 | 266729 | 1,58 | up   |
| 6212266 | 7277904 | 1567795 | disabled homolog 1 (Drosophila)     | Dab1 | 266729 | 1,11 | down |
| 6217388 | 7277904 | 1567785 | disabled homolog 1 (Drosophila)     | Dab1 | 266729 | 1,35 | down |
| 6335381 | 7277904 | 1567793 | disabled homolog 1 (Drosophila)     | Dab1 | 266729 | 1,46 | down |
| 6493888 | 7277904 | 1567792 | disabled homolog 1 (Drosophila)     | Dab1 | 266729 | 1,09 | down |
| 6561268 | 7277904 | 1567784 | disabled homolog 1 (Drosophila)     | Dab1 | 266729 | 1,11 | down |
| 6592422 | 7277904 | 1567794 | disabled homolog 1 (Drosophila)     | Dab1 | 266729 | 1,12 | down |
| 6703309 | 7277904 | 1567790 | disabled homolog 1 (Drosophila)     | Dab1 | 266729 | 1,30 | up   |
| 6727086 | 7277904 | 1567787 | disabled homolog 1 (Drosophila)     | Dab1 | 266729 | 1,43 | down |
| 5722979 | 7375958 | 1811489 | discs, large homolog 3 (Drosophila) | Dlg3 | 58948  | 1,58 | up   |
| 5755526 | 7375958 | 1811496 | discs, large homolog 3 (Drosophila) | Dlg3 | 58948  | 1,05 | down |
| 5780648 | 7375958 | 1811481 | discs, large homolog 3 (Drosophila) | Dlg3 | 58948  | 1,23 | up   |
| 5907661 | 7375958 | 1811488 | discs, large homolog 3 (Drosophila) | Dlg3 | 58948  | 1,09 | down |
| 5915851 | 7375958 | 1811484 | discs, large homolog 3 (Drosophila) | Dlg3 | 58948  | 1,03 | up   |
| 6013707 | 7375958 | 1811487 | discs, large homolog 3 (Drosophila) | Dlg3 | 58948  | 1,37 | up   |
| 6060689 | 7375958 | 1811498 | discs, large homolog 3 (Drosophila) | Dlg3 | 58948  | 1,11 | down |
| 6070347 | 7375958 | 1811492 | discs, large homolog 3 (Drosophila) | Dlg3 | 58948  | 1,48 | down |
| 6235952 | 7375958 | 1811479 | discs, large homolog 3 (Drosophila) | Dlg3 | 58948  | 2,06 | up   |
| 6289287 | 7375958 | 1811493 | discs, large homolog 3 (Drosophila) | Dlg3 | 58948  | 1,33 | down |
| 6292500 | 7375958 | 1811485 | discs, large homolog 3 (Drosophila) | Dlg3 | 58948  | 1,37 | up   |
| 6331307 | 7375958 | 1811491 | discs, large homolog 3 (Drosophila) | Dlg3 | 58948  | 1,45 | down |
| 6335832 | 7375958 | 1811490 | discs, large homolog 3 (Drosophila) | Dlg3 | 58948  | 1,12 | down |
| 6339706 | 7375958 | 1811497 | discs, large homolog 3 (Drosophila) | Dlg3 | 58948  | 1,05 | up   |
| 6356643 | 7375958 | 1811480 | discs, large homolog 3 (Drosophila) | Dlg3 | 58948  | 1,41 | up   |

|         |         |         |                                     |        |        |      |      |
|---------|---------|---------|-------------------------------------|--------|--------|------|------|
| 6369945 | 7375958 | 1811494 | discs, large homolog 3 (Drosophila) | Dlg3   | 58948  | 1,01 | down |
| 6417912 | 7375958 | 1811495 | discs, large homolog 3 (Drosophila) | Dlg3   | 58948  | 1,01 | down |
| 6418605 | 7375958 | 1811482 | discs, large homolog 3 (Drosophila) | Dlg3   | 58948  | 2,12 | up   |
| 6447592 | 7375958 | 1811499 | discs, large homolog 3 (Drosophila) | Dlg3   | 58948  | 1,39 | down |
| 6653462 | 7375958 | 1811479 | discs, large homolog 3 (Drosophila) | Dlg3   | 58948  | 1,43 | up   |
| 6690496 | 7375958 | 1811483 | discs, large homolog 3 (Drosophila) | Dlg3   | 58948  | 1,13 | up   |
| 6718423 | 7375958 | 1811486 | discs, large homolog 3 (Drosophila) | Dlg3   | 58948  | 1,56 | up   |
| 5633271 | 7129578 | 1200068 | discs, large homolog 5 (Drosophila) | Dlg5   | 305645 | 1,08 | up   |
| 5668512 | 7129578 | 1200052 | discs, large homolog 5 (Drosophila) | Dlg5   | 305645 | 1,06 | up   |
| 5688983 | 7129578 | 1200075 | discs, large homolog 5 (Drosophila) | Dlg5   | 305645 | 1,34 | down |
| 5716168 | 7129578 | 1200075 | discs, large homolog 5 (Drosophila) | Dlg5   | 305645 | 1,10 | up   |
| 5728317 | 7129578 | 1200043 | discs, large homolog 5 (Drosophila) | Dlg5   | 305645 | 1,26 | down |
| 5736555 | 7129578 | 1200048 | discs, large homolog 5 (Drosophila) | Dlg5   | 305645 | 1,24 | up   |
| 5753102 | 7129578 | 1200061 | discs, large homolog 5 (Drosophila) | Dlg5   | 305645 | 1,01 | up   |
| 5829481 | 7129578 | 1200063 | discs, large homolog 5 (Drosophila) | Dlg5   | 305645 | 1,55 | up   |
| 5891572 | 7129578 | 1200075 | discs, large homolog 5 (Drosophila) | Dlg5   | 305645 | 1,01 | up   |
| 5898738 | 7129578 | 1200063 | discs, large homolog 5 (Drosophila) | Dlg5   | 305645 | 1,00 | up   |
| 6028900 | 7129578 | 1200075 | discs, large homolog 5 (Drosophila) | Dlg5   | 305645 | 1,46 | up   |
| 6030898 | 7129578 | 1200062 | discs, large homolog 5 (Drosophila) | Dlg5   | 305645 | 1,02 | down |
| 6065375 | 7129578 | 1200044 | discs, large homolog 5 (Drosophila) | Dlg5   | 305645 | 1,15 | up   |
| 6080814 | 7129578 | 1200053 | discs, large homolog 5 (Drosophila) | Dlg5   | 305645 | 1,19 | up   |
| 6119011 | 7129578 | 1200075 | discs, large homolog 5 (Drosophila) | Dlg5   | 305645 | 1,26 | up   |
| 6125576 | 7129578 | 1200072 | discs, large homolog 5 (Drosophila) | Dlg5   | 305645 | 1,34 | down |
| 6270330 | 7129578 | 1200075 | discs, large homolog 5 (Drosophila) | Dlg5   | 305645 | 1,09 | down |
| 6287202 | 7129578 | 1200056 | discs, large homolog 5 (Drosophila) | Dlg5   | 305645 | 1,27 | up   |
| 6303609 | 7129578 | 1200069 | discs, large homolog 5 (Drosophila) | Dlg5   | 305645 | 1,05 | down |
| 6303653 | 7129578 | 1200075 | discs, large homolog 5 (Drosophila) | Dlg5   | 305645 | 1,32 | down |
| 6377028 | 7129578 | 1200071 | discs, large homolog 5 (Drosophila) | Dlg5   | 305645 | 1,03 | down |
| 6377928 | 7129578 | 1200075 | discs, large homolog 5 (Drosophila) | Dlg5   | 305645 | 2,01 | down |
| 6442360 | 7129578 | 1200074 | discs, large homolog 5 (Drosophila) | Dlg5   | 305645 | 1,06 | up   |
| 6459805 | 7129578 | 1200054 | discs, large homolog 5 (Drosophila) | Dlg5   | 305645 | 1,55 | down |
| 6490724 | 7129578 | 1200050 | discs, large homolog 5 (Drosophila) | Dlg5   | 305645 | 1,03 | down |
| 6493292 | 7129578 | 1200055 | discs, large homolog 5 (Drosophila) | Dlg5   | 305645 | 1,32 | up   |
| 6500987 | 7129578 | 1200045 | discs, large homolog 5 (Drosophila) | Dlg5   | 305645 | 1,35 | down |
| 6577800 | 7129578 | 1200049 | discs, large homolog 5 (Drosophila) | Dlg5   | 305645 | 1,52 | down |
| 6593885 | 7129578 | 1200075 | discs, large homolog 5 (Drosophila) | Dlg5   | 305645 | 1,29 | down |
| 6597583 | 7129578 | 1200059 | discs, large homolog 5 (Drosophila) | Dlg5   | 305645 | 1,62 | up   |
| 6608120 | 7129578 | 1200057 | discs, large homolog 5 (Drosophila) | Dlg5   | 305645 | 1,11 | up   |
| 6633038 | 7129578 | 1200060 | discs, large homolog 5 (Drosophila) | Dlg5   | 305645 | 1,01 | down |
| 6645228 | 7129578 | 1200046 | discs, large homolog 5 (Drosophila) | Dlg5   | 305645 | 1,29 | down |
| 6672136 | 7129578 | 1200042 | discs, large homolog 5 (Drosophila) | Dlg5   | 305645 | 1,69 | down |
| 6691832 | 7129578 | 1200053 | discs, large homolog 5 (Drosophila) | Dlg5   | 305645 | 1,32 | down |
| 6702602 | 7129578 | 1200047 | discs, large homolog 5 (Drosophila) | Dlg5   | 305645 | 1,19 | up   |
| 5668473 | 7345465 | 1733832 | DIX domain containing 1             | Dixdc1 | 363062 | 1,42 | down |
| 5682166 | 7345465 | 1733845 | DIX domain containing 1             | Dixdc1 | 363062 | 1,01 | up   |
| 5720655 | 7345465 | 1733838 | DIX domain containing 1             | Dixdc1 | 363062 | 2,02 | down |
| 5773568 | 7345465 | 1733819 | DIX domain containing 1             | Dixdc1 | 363062 | 1,26 | up   |
| 5862928 | 7345465 | 1733819 | DIX domain containing 1             | Dixdc1 | 363062 | 1,85 | down |
| 5881916 | 7345465 | 1733837 | DIX domain containing 1             | Dixdc1 | 363062 | 1,20 | down |
| 6061482 | 7345465 | 1733847 | DIX domain containing 1             | Dixdc1 | 363062 | 1,14 | down |
| 6073327 | 7345465 | 1733820 | DIX domain containing 1             | Dixdc1 | 363062 | 2,18 | down |
| 6094717 | 7345465 | 1733834 | DIX domain containing 1             | Dixdc1 | 363062 | 1,22 | up   |
| 6133156 | 7345465 | 1733819 | DIX domain containing 1             | Dixdc1 | 363062 | 1,30 | down |
| 6189362 | 7345465 | 1733824 | DIX domain containing 1             | Dixdc1 | 363062 | 1,27 | down |
| 6190068 | 7345465 | 1733826 | DIX domain containing 1             | Dixdc1 | 363062 | 1,05 | up   |
| 6223917 | 7345465 | 1733821 | DIX domain containing 1             | Dixdc1 | 363062 | 1,23 | up   |

|         |         |         |                         |        |        |      |      |
|---------|---------|---------|-------------------------|--------|--------|------|------|
| 6242773 | 7345465 | 1733830 | DIX domain containing 1 | Dixdc1 | 363062 | 1,01 | down |
| 6267436 | 7345465 | 1733829 | DIX domain containing 1 | Dixdc1 | 363062 | 1,25 | up   |
| 6278461 | 7345465 | 1733819 | DIX domain containing 1 | Dixdc1 | 363062 | 1,31 | down |
| 6370099 | 7345465 | 1733833 | DIX domain containing 1 | Dixdc1 | 363062 | 1,30 | down |
| 6389998 | 7345465 | 1733819 | DIX domain containing 1 | Dixdc1 | 363062 | 1,01 | up   |
| 6459759 | 7345465 | 1733846 | DIX domain containing 1 | Dixdc1 | 363062 | 1,42 | up   |
| 6551858 | 7345465 | 1733828 | DIX domain containing 1 | Dixdc1 | 363062 | 1,59 | down |
| 6671327 | 7345465 | 1733846 | DIX domain containing 1 | Dixdc1 | 363062 | 1,83 | down |
| 6717501 | 7345465 | 1733851 | DIX domain containing 1 | Dixdc1 | 363062 | 1,15 | up   |
| 6722336 | 7345465 | 1733831 | DIX domain containing 1 | Dixdc1 | 363062 | 1,23 | down |
| 6739667 | 7345465 | 1733819 | DIX domain containing 1 | Dixdc1 | 363062 | 1,26 | down |
| 5663083 | 7278352 | 1569012 | DMRT-like family A2     | Dmrta2 | 313471 | 1,31 | down |
| 5664439 | 7278352 | 1569016 | DMRT-like family A2     | Dmrta2 | 313471 | 1,03 | down |
| 5664868 | 7278352 | 1569016 | DMRT-like family A2     | Dmrta2 | 313471 | 1,07 | up   |
| 5709551 | 7278352 | 1569016 | DMRT-like family A2     | Dmrta2 | 313471 | 1,02 | up   |
| 5897445 | 7278352 | 1569016 | DMRT-like family A2     | Dmrta2 | 313471 | 1,60 | down |
| 5926625 | 7278352 | 1569016 | DMRT-like family A2     | Dmrta2 | 313471 | 1,34 | down |
| 6061710 | 7278352 | 1569014 | DMRT-like family A2     | Dmrta2 | 313471 | 1,00 | up   |
| 6149317 | 7278352 | 1569014 | DMRT-like family A2     | Dmrta2 | 313471 | 1,55 | up   |
| 6227959 | 7278352 | 1569016 | DMRT-like family A2     | Dmrta2 | 313471 | 1,01 | down |
| 6233284 | 7278352 | 1569016 | DMRT-like family A2     | Dmrta2 | 313471 | 1,07 | up   |
| 6235105 | 7278352 | 1569014 | DMRT-like family A2     | Dmrta2 | 313471 | 1,00 | up   |
| 6240976 | 7278352 | 1569016 | DMRT-like family A2     | Dmrta2 | 313471 | 1,11 | up   |
| 6241210 | 7278352 | 1569016 | DMRT-like family A2     | Dmrta2 | 313471 | 2,20 | up   |
| 6260072 | 7278352 | 1569016 | DMRT-like family A2     | Dmrta2 | 313471 | 1,00 | up   |
| 6267320 | 7278352 | 1569016 | DMRT-like family A2     | Dmrta2 | 313471 | 1,21 | down |
| 6277077 | 7278352 | 1569014 | DMRT-like family A2     | Dmrta2 | 313471 | 1,04 | down |
| 6303606 | 7278352 | 1569014 | DMRT-like family A2     | Dmrta2 | 313471 | 1,38 | up   |
| 6380261 | 7278352 | 1569016 | DMRT-like family A2     | Dmrta2 | 313471 | 1,21 | up   |
| 5917951 | 7382544 | 1826449 | DMRT-like family C1c    | Dmrta2 | 313471 | 1,66 | down |
| 6010602 | 7382544 | 1826445 | DMRT-like family C1c    | Dmrta2 | 313471 | 2,31 | up   |
| 6058748 | 7382544 | 1826446 | DMRT-like family C1c    | Dmrta2 | 313471 | 1,15 | up   |
| 6140504 | 7382544 | 1826451 | DMRT-like family C1c    | Dmrta2 | 313471 | 1,03 | up   |
| 6315158 | 7382544 | 1826448 | DMRT-like family C1c    | Dmrta2 | 313471 | 1,51 | down |
| 6390182 | 7382544 | 1826447 | DMRT-like family C1c    | Dmrta2 | 313471 | 1,09 | down |
| 6399463 | 7382544 | 1826451 | DMRT-like family C1c    | Dmrta2 | 313471 | 1,18 | down |
| 6457901 | 7382544 | 1826448 | DMRT-like family C1c    | Dmrta2 | 313471 | 1,17 | up   |
| 6476759 | 7382544 | 1826450 | DMRT-like family C1c    | Dmrta2 | 313471 | 1,07 | down |
| 6724731 | 7382544 | 1826452 | DMRT-like family C1c    | Dmrta2 | 313471 | 1,39 | up   |
| 5648876 | 7345882 | 1734805 | Dmx-like 2              | Dmxl2  | 315676 | 1,17 | down |
| 5702195 | 7345882 | 1734791 | Dmx-like 2              | Dmxl2  | 315676 | 1,05 | down |
| 5725260 | 7345882 | 1734794 | Dmx-like 2              | Dmxl2  | 315676 | 2,02 | down |
| 5736250 | 7345882 | 1734812 | Dmx-like 2              | Dmxl2  | 315676 | 1,07 | up   |
| 5804174 | 7345882 | 1734796 | Dmx-like 2              | Dmxl2  | 315676 | 1,52 | down |
| 5804292 | 7345882 | 1734816 | Dmx-like 2              | Dmxl2  | 315676 | 1,32 | up   |
| 5815064 | 7345882 | 1734796 | Dmx-like 2              | Dmxl2  | 315676 | 2,32 | down |
| 5837716 | 7345882 | 1734792 | Dmx-like 2              | Dmxl2  | 315676 | 1,08 | down |
| 5867625 | 7345882 | 1734807 | Dmx-like 2              | Dmxl2  | 315676 | 1,07 | down |
| 5880156 | 7345882 | 1734808 | Dmx-like 2              | Dmxl2  | 315676 | 1,04 | up   |
| 5961117 | 7345882 | 1734806 | Dmx-like 2              | Dmxl2  | 315676 | 1,77 | down |
| 5980396 | 7345882 | 1734801 | Dmx-like 2              | Dmxl2  | 315676 | 1,08 | up   |
| 5981424 | 7345882 | 1734790 | Dmx-like 2              | Dmxl2  | 315676 | 1,17 | up   |
| 6111684 | 7345882 | 1734792 | Dmx-like 2              | Dmxl2  | 315676 | 1,02 | down |
| 6132457 | 7345882 | 1734796 | Dmx-like 2              | Dmxl2  | 315676 | 1,11 | up   |
| 6137774 | 7345882 | 1734789 | Dmx-like 2              | Dmxl2  | 315676 | 1,09 | down |
| 6153947 | 7345882 | 1734793 | Dmx-like 2              | Dmxl2  | 315676 | 1,25 | up   |

|         |         |         |                                                                              |         |        |      |      |
|---------|---------|---------|------------------------------------------------------------------------------|---------|--------|------|------|
| 6182599 | 7345882 | 1734808 | Dmx-like 2                                                                   | Dmxl2   | 315676 | 1,28 | up   |
| 6230761 | 7345882 | 1734798 | Dmx-like 2                                                                   | Dmxl2   | 315676 | 1,52 | up   |
| 6441645 | 7345882 | 1734806 | Dmx-like 2                                                                   | Dmxl2   | 315676 | 1,20 | up   |
| 6479687 | 7345882 | 1734795 | Dmx-like 2                                                                   | Dmxl2   | 315676 | 1,62 | up   |
| 6487595 | 7345882 | 1734812 | Dmx-like 2                                                                   | Dmxl2   | 315676 | 1,13 | up   |
| 6506012 | 7345882 | 1734800 | Dmx-like 2                                                                   | Dmxl2   | 315676 | 1,16 | down |
| 6577430 | 7345882 | 1734796 | Dmx-like 2                                                                   | Dmxl2   | 315676 | 1,42 | up   |
| 6605068 | 7345882 | 1734804 | Dmx-like 2                                                                   | Dmxl2   | 315676 | 1,03 | down |
| 6617224 | 7345882 | 1734814 | Dmx-like 2                                                                   | Dmxl2   | 315676 | 1,37 | down |
| 6682641 | 7345882 | 1734795 | Dmx-like 2                                                                   | Dmxl2   | 315676 | 1,12 | up   |
| 5702535 | 7281533 | 1576785 | DNA fragmentation factor, alpha subunit                                      | Dffa    | 114214 | 2,38 | up   |
| 5968206 | 7281533 | 1576784 | DNA fragmentation factor, alpha subunit                                      | Dffa    | 114214 | 1,16 | down |
| 6499398 | 7281533 | 1576781 | DNA fragmentation factor, alpha subunit                                      | Dffa    | 114214 | 1,07 | down |
| 6559001 | 7281533 | 1576782 | DNA fragmentation factor, alpha subunit                                      | Dffa    | 114214 | 1,27 | up   |
| 6563831 | 7281533 | 1576783 | DNA fragmentation factor, alpha subunit                                      | Dffa    | 114214 | 1,96 | down |
| 6673436 | 7281533 | 1576781 | DNA fragmentation factor, alpha subunit                                      | Dffa    | 114214 | 1,36 | down |
| 5638105 | 7292657 | 1602844 | DNA-damage inducible protein 2                                               | Ddi2    | 313668 | 1,01 | down |
| 5727663 | 7292657 | 1602847 | DNA-damage inducible protein 2                                               | Ddi2    | 313668 | 1,03 | down |
| 5730394 | 7292657 | 1602847 | DNA-damage inducible protein 2                                               | Ddi2    | 313668 | 1,06 | down |
| 5772540 | 7292657 | 1602836 | DNA-damage inducible protein 2                                               | Ddi2    | 313668 | 1,22 | down |
| 5905162 | 7292657 | 1602836 | DNA-damage inducible protein 2                                               | Ddi2    | 313668 | 1,08 | down |
| 6085689 | 7292657 | 1602841 | DNA-damage inducible protein 2                                               | Ddi2    | 313668 | 1,14 | down |
| 6147390 | 7292657 | 1602836 | DNA-damage inducible protein 2                                               | Ddi2    | 313668 | 1,09 | up   |
| 6155442 | 7292657 | 1602842 | DNA-damage inducible protein 2                                               | Ddi2    | 313668 | 1,08 | down |
| 6178356 | 7292657 | 1602845 | DNA-damage inducible protein 2                                               | Ddi2    | 313668 | 1,11 | up   |
| 6246820 | 7292657 | 1602846 | DNA-damage inducible protein 2                                               | Ddi2    | 313668 | 1,00 | up   |
| 6287195 | 7292657 | 1602836 | DNA-damage inducible protein 2                                               | Ddi2    | 313668 | 1,12 | down |
| 6318979 | 7292657 | 1602845 | DNA-damage inducible protein 2                                               | Ddi2    | 313668 | 1,32 | up   |
| 6329697 | 7292657 | 1602837 | DNA-damage inducible protein 2                                               | Ddi2    | 313668 | 1,21 | down |
| 6356823 | 7292657 | 1602847 | DNA-damage inducible protein 2                                               | Ddi2    | 313668 | 2,91 | down |
| 6379163 | 7292657 | 1602836 | DNA-damage inducible protein 2                                               | Ddi2    | 313668 | 1,21 | down |
| 6581380 | 7292657 | 1602843 | DNA-damage inducible protein 2                                               | Ddi2    | 313668 | 1,11 | up   |
| 6611116 | 7292657 | 1602840 | DNA-damage inducible protein 2                                               | Ddi2    | 313668 | 1,08 | down |
| 5663260 | 7292669 | 1602867 | DnaJ (Hsp40) homolog, subfamily C, member 16                                 | Dnajc16 | 362652 | 1,13 | down |
| 5758262 | 7292669 | 1602873 | DnaJ (Hsp40) homolog, subfamily C, member 16                                 | Dnajc16 | 362652 | 1,28 | down |
| 5832241 | 7292669 | 1602875 | DnaJ (Hsp40) homolog, subfamily C, member 16                                 | Dnajc16 | 362652 | 1,34 | down |
| 5985876 | 7292669 | 1602870 | DnaJ (Hsp40) homolog, subfamily C, member 16                                 | Dnajc16 | 362652 | 1,29 | down |
| 6058985 | 7292669 | 1602865 | DnaJ (Hsp40) homolog, subfamily C, member 16                                 | Dnajc16 | 362652 | 1,23 | down |
| 6067246 | 7292669 | 1602866 | DnaJ (Hsp40) homolog, subfamily C, member 16                                 | Dnajc16 | 362652 | 1,03 | down |
| 6168591 | 7292669 | 1602875 | DnaJ (Hsp40) homolog, subfamily C, member 16                                 | Dnajc16 | 362652 | 1,29 | up   |
| 6191024 | 7292669 | 1602868 | DnaJ (Hsp40) homolog, subfamily C, member 16                                 | Dnajc16 | 362652 | 1,38 | up   |
| 6305031 | 7292669 | 1602864 | DnaJ (Hsp40) homolog, subfamily C, member 16                                 | Dnajc16 | 362652 | 2,56 | down |
| 6320256 | 7292669 | 1602863 | DnaJ (Hsp40) homolog, subfamily C, member 16                                 | Dnajc16 | 362652 | 1,17 | up   |
| 6322560 | 7292669 | 1602862 | DnaJ (Hsp40) homolog, subfamily C, member 16                                 | Dnajc16 | 362652 | 1,04 | down |
| 6433179 | 7292669 | 1602871 | DnaJ (Hsp40) homolog, subfamily C, member 16                                 | Dnajc16 | 362652 | 1,68 | up   |
| 6438649 | 7292669 | 1602874 | DnaJ (Hsp40) homolog, subfamily C, member 16                                 | Dnajc16 | 362652 | 1,25 | up   |
| 6693936 | 7292669 | 1602872 | DnaJ (Hsp40) homolog, subfamily C, member 16                                 | Dnajc16 | 362652 | 1,00 | up   |
| 6724526 | 7292669 | 1602869 | DnaJ (Hsp40) homolog, subfamily C, member 16                                 | Dnajc16 | 362652 | 1,04 | down |
| 5618072 | 7178060 | 1320153 | docking protein 6                                                            | Dok6    | 498898 | 1,21 | down |
| 6471532 | 7178060 | 1320153 | docking protein 6                                                            | Dok6    | 498898 | 2,18 | up   |
| 6496768 | 7178060 | 1320153 | docking protein 6                                                            | Dok6    | 498898 | 1,14 | up   |
| 6662639 | 7178060 | 1320153 | docking protein 6                                                            | Dok6    | 498898 | 1,26 | up   |
| 5737060 | 7065530 | 1044963 | dodecenoyl-Coenzyme A delta isomerase (3,2 trans-enoyl-Coenzyme A isomerase) | Dci     | 29740  | 1,13 | down |
| 5854667 | 7065530 | 1044959 | dodecenoyl-Coenzyme A delta isomerase (3,2 trans-enoyl-Coenzyme A isomerase) | Dci     | 29740  | 1,13 | down |
| 5884586 | 7065530 | 1044964 | dodecenoyl-Coenzyme A delta isomerase (3,2 trans-enoyl-Coenzyme A isomerase) | Dci     | 29740  | 1,19 | up   |
| 5904945 | 7065530 | 1044958 | dodecenoyl-Coenzyme A delta isomerase (3,2 trans-enoyl-Coenzyme A isomerase) | Dci     | 29740  | 1,01 | up   |

|         |         |         |                                                                              |        |        |      |      |
|---------|---------|---------|------------------------------------------------------------------------------|--------|--------|------|------|
| 6004535 | 7065530 | 1044961 | dodecenoyl-Coenzyme A delta isomerase (3,2 trans-enoyl-Coenzyme A isomerase) | Dci    | 29740  | 1,07 | up   |
| 6545454 | 7065530 | 1044960 | dodecenoyl-Coenzyme A delta isomerase (3,2 trans-enoyl-Coenzyme A isomerase) | Dci    | 29740  | 1,50 | up   |
| 6705100 | 7065530 | 1044965 | dodecenoyl-Coenzyme A delta isomerase (3,2 trans-enoyl-Coenzyme A isomerase) | Dci    | 29740  | 1,26 | down |
| 6742442 | 7065530 | 1044962 | dodecenoyl-Coenzyme A delta isomerase (3,2 trans-enoyl-Coenzyme A isomerase) | Dci    | 29740  | 2,52 | down |
| 5652390 | 7128240 | 1196937 | dopa decarboxylase (aromatic L-amino acid decarboxylase)                     | Ddc    | 24311  | 1,37 | down |
| 5743040 | 7128240 | 1196945 | dopa decarboxylase (aromatic L-amino acid decarboxylase)                     | Ddc    | 24311  | 1,05 | down |
| 5799098 | 7128240 | 1196946 | dopa decarboxylase (aromatic L-amino acid decarboxylase)                     | Ddc    | 24311  | 1,02 | up   |
| 5811849 | 7128240 | 1196937 | dopa decarboxylase (aromatic L-amino acid decarboxylase)                     | Ddc    | 24311  | 1,06 | down |
| 5817658 | 7128240 | 1196941 | dopa decarboxylase (aromatic L-amino acid decarboxylase)                     | Ddc    | 24311  | 1,54 | down |
| 5836901 | 7128240 | 1196942 | dopa decarboxylase (aromatic L-amino acid decarboxylase)                     | Ddc    | 24311  | 1,04 | up   |
| 5864191 | 7128240 | 1196948 | dopa decarboxylase (aromatic L-amino acid decarboxylase)                     | Ddc    | 24311  | 1,29 | down |
| 5876227 | 7128240 | 1196939 | dopa decarboxylase (aromatic L-amino acid decarboxylase)                     | Ddc    | 24311  | 1,50 | down |
| 5984742 | 7128240 | 1196937 | dopa decarboxylase (aromatic L-amino acid decarboxylase)                     | Ddc    | 24311  | 2,15 | up   |
| 6065961 | 7128240 | 1196949 | dopa decarboxylase (aromatic L-amino acid decarboxylase)                     | Ddc    | 24311  | 1,13 | up   |
| 6102979 | 7128240 | 1196937 | dopa decarboxylase (aromatic L-amino acid decarboxylase)                     | Ddc    | 24311  | 1,42 | up   |
| 6206531 | 7128240 | 1196950 | dopa decarboxylase (aromatic L-amino acid decarboxylase)                     | Ddc    | 24311  | 1,33 | down |
| 6226905 | 7128240 | 1196937 | dopa decarboxylase (aromatic L-amino acid decarboxylase)                     | Ddc    | 24311  | 1,51 | up   |
| 6292831 | 7128240 | 1196944 | dopa decarboxylase (aromatic L-amino acid decarboxylase)                     | Ddc    | 24311  | 1,04 | up   |
| 6565935 | 7128240 | 1196940 | dopa decarboxylase (aromatic L-amino acid decarboxylase)                     | Ddc    | 24311  | 1,14 | up   |
| 6576396 | 7128240 | 1196937 | dopa decarboxylase (aromatic L-amino acid decarboxylase)                     | Ddc    | 24311  | 1,10 | down |
| 6640068 | 7128240 | 1196940 | dopa decarboxylase (aromatic L-amino acid decarboxylase)                     | Ddc    | 24311  | 1,32 | up   |
| 6654008 | 7128240 | 1196938 | dopa decarboxylase (aromatic L-amino acid decarboxylase)                     | Ddc    | 24311  | 1,15 | up   |
| 6686864 | 7128240 | 1196943 | dopa decarboxylase (aromatic L-amino acid decarboxylase)                     | Ddc    | 24311  | 1,39 | up   |
| 6692406 | 7128240 | 1196947 | dopa decarboxylase (aromatic L-amino acid decarboxylase)                     | Ddc    | 24311  | 1,27 | down |
| 5868869 | 7086966 | 1095234 | dopey family member 2                                                        | Dopey2 | 304077 | 1,69 | up   |
| 6645641 | 7086966 | 1095291 | dopey family member 2                                                        | Dopey2 | 304077 | 1,21 | down |
| 5868091 | 7079861 | 1079195 | double C2-like domains, beta                                                 | Doc2b  | 81820  | 1,93 | down |
| 5915620 | 7079861 | 1079201 | double C2-like domains, beta                                                 | Doc2b  | 81820  | 1,10 | up   |
| 6026953 | 7079861 | 1079196 | double C2-like domains, beta                                                 | Doc2b  | 81820  | 1,21 | up   |
| 6085591 | 7079861 | 1079201 | double C2-like domains, beta                                                 | Doc2b  | 81820  | 1,25 | up   |
| 6159097 | 7079861 | 1079202 | double C2-like domains, beta                                                 | Doc2b  | 81820  | 1,11 | up   |
| 6164307 | 7079861 | 1079201 | double C2-like domains, beta                                                 | Doc2b  | 81820  | 2,43 | up   |
| 6202777 | 7079861 | 1079201 | double C2-like domains, beta                                                 | Doc2b  | 81820  | 2,70 | down |
| 6262384 | 7079861 | 1079200 | double C2-like domains, beta                                                 | Doc2b  | 81820  | 1,14 | down |
| 6275925 | 7079861 | 1079198 | double C2-like domains, beta                                                 | Doc2b  | 81820  | 1,03 | up   |
| 6373948 | 7079861 | 1079199 | double C2-like domains, beta                                                 | Doc2b  | 81820  | 1,07 | down |
| 6432641 | 7079861 | 1079202 | double C2-like domains, beta                                                 | Doc2b  | 81820  | 1,63 | up   |
| 6440333 | 7079861 | 1079194 | double C2-like domains, beta                                                 | Doc2b  | 81820  | 1,06 | down |
| 6637316 | 7079861 | 1079197 | double C2-like domains, beta                                                 | Doc2b  | 81820  | 1,06 | down |
| 5684035 | 7230886 | 1449561 | doublecortin domain containing 5                                             | Dcdc5  | 295980 | 1,35 | down |
| 5927867 | 7230886 | 1449565 | doublecortin domain containing 5                                             | Dcdc5  | 295980 | 1,20 | down |
| 5936608 | 7230886 | 1449564 | doublecortin domain containing 5                                             | Dcdc5  | 295980 | 1,29 | down |
| 5978512 | 7230886 | 1449552 | doublecortin domain containing 5                                             | Dcdc5  | 295980 | 1,00 | up   |
| 6000916 | 7230886 | 1449550 | doublecortin domain containing 5                                             | Dcdc5  | 295980 | 1,71 | down |
| 6062544 | 7230886 | 1449555 | doublecortin domain containing 5                                             | Dcdc5  | 295980 | 1,75 | down |
| 6158990 | 7230886 | 1449568 | doublecortin domain containing 5                                             | Dcdc5  | 295980 | 1,06 | down |
| 6218698 | 7230886 | 1449561 | doublecortin domain containing 5                                             | Dcdc5  | 295980 | 1,03 | up   |
| 6227419 | 7230886 | 1449566 | doublecortin domain containing 5                                             | Dcdc5  | 295980 | 2,29 | up   |
| 6289661 | 7230886 | 1449560 | doublecortin domain containing 5                                             | Dcdc5  | 295980 | 1,39 | down |
| 6337443 | 7230886 | 1449560 | doublecortin domain containing 5                                             | Dcdc5  | 295980 | 1,14 | up   |
| 6341157 | 7230886 | 1449553 | doublecortin domain containing 5                                             | Dcdc5  | 295980 | 2,04 | down |
| 6367549 | 7230886 | 1449548 | doublecortin domain containing 5                                             | Dcdc5  | 295980 | 1,01 | down |
| 6384190 | 7230886 | 1449568 | doublecortin domain containing 5                                             | Dcdc5  | 295980 | 1,02 | down |
| 6474880 | 7230886 | 1449567 | doublecortin domain containing 5                                             | Dcdc5  | 295980 | 1,01 | down |
| 6592448 | 7230886 | 1449548 | doublecortin domain containing 5                                             | Dcdc5  | 295980 | 1,08 | down |
| 6604939 | 7230886 | 1449562 | doublecortin domain containing 5                                             | Dcdc5  | 295980 | 1,28 | down |



|         |         |         |                                     |        |        |      |      |
|---------|---------|---------|-------------------------------------|--------|--------|------|------|
| 6618447 | 7230886 | 1449556 | doublecortin domain containing 5    | Dcdc5  | 295980 | 1,23 | up   |
| 6630498 | 7230886 | 1449532 | doublecortin domain containing 5    | Dcdc5  | 295980 | 1,12 | up   |
| 6683853 | 7230886 | 1449559 | doublecortin domain containing 5    | Dcdc5  | 295980 | 1,68 | up   |
| 6694322 | 7230886 | 1449554 | doublecortin domain containing 5    | Dcdc5  | 295980 | 1,08 | up   |
| 5710005 | 7194202 | 1361303 | doublecortin-like kinase 1          | Dclk1  | 83825  | 1,13 | down |
| 5873889 | 7194202 | 1361296 | doublecortin-like kinase 1          | Dclk1  | 83825  | 1,17 | up   |
| 5943948 | 7194202 | 1361302 | doublecortin-like kinase 1          | Dclk1  | 83825  | 1,64 | up   |
| 6124103 | 7194202 | 1361309 | doublecortin-like kinase 1          | Dclk1  | 83825  | 1,35 | down |
| 6212388 | 7194202 | 1361305 | doublecortin-like kinase 1          | Dclk1  | 83825  | 1,64 | down |
| 6261852 | 7194202 | 1361306 | doublecortin-like kinase 1          | Dclk1  | 83825  | 1,19 | down |
| 6270264 | 7194202 | 1361304 | doublecortin-like kinase 1          | Dclk1  | 83825  | 1,14 | up   |
| 6299017 | 7194202 | 1361308 | doublecortin-like kinase 1          | Dclk1  | 83825  | 1,60 | up   |
| 6303437 | 7194202 | 1361298 | doublecortin-like kinase 1          | Dclk1  | 83825  | 2,22 | up   |
| 6308950 | 7194202 | 1361300 | doublecortin-like kinase 1          | Dclk1  | 83825  | 1,18 | down |
| 6498992 | 7194202 | 1361299 | doublecortin-like kinase 1          | Dclk1  | 83825  | 1,18 | up   |
| 6515615 | 7194202 | 1361310 | doublecortin-like kinase 1          | Dclk1  | 83825  | 1,26 | down |
| 6572695 | 7194202 | 1361301 | doublecortin-like kinase 1          | Dclk1  | 83825  | 1,02 | down |
| 6596800 | 7194202 | 1361307 | doublecortin-like kinase 1          | Dclk1  | 83825  | 1,76 | down |
| 6736405 | 7194202 | 1361295 | doublecortin-like kinase 1          | Dclk1  | 83825  | 2,24 | up   |
| 5680970 | 7091695 | 1107201 | downstream neighbor of SON          | Donson | 288257 | 1,65 | up   |
| 5750345 | 7091695 | 1107201 | downstream neighbor of SON          | Donson | 288257 | 1,64 | up   |
| 5804398 | 7091695 | 1107195 | downstream neighbor of SON          | Donson | 288257 | 1,12 | down |
| 5913626 | 7091695 | 1107194 | downstream neighbor of SON          | Donson | 288257 | 1,07 | down |
| 5975520 | 7091695 | 1107195 | downstream neighbor of SON          | Donson | 288257 | 1,22 | down |
| 6009497 | 7091695 | 1107202 | downstream neighbor of SON          | Donson | 288257 | 2,50 | down |
| 6009807 | 7091695 | 1107200 | downstream neighbor of SON          | Donson | 288257 | 1,22 | up   |
| 6039067 | 7091695 | 1107203 | downstream neighbor of SON          | Donson | 288257 | 2,25 | down |
| 6131844 | 7091695 | 1107199 | downstream neighbor of SON          | Donson | 288257 | 1,79 | up   |
| 6201046 | 7091695 | 1107196 | downstream neighbor of SON          | Donson | 288257 | 1,13 | up   |
| 6448769 | 7091695 | 1107198 | downstream neighbor of SON          | Donson | 288257 | 1,74 | up   |
| 6507962 | 7091695 | 1107197 | downstream neighbor of SON          | Donson | 288257 | 1,05 | up   |
| 6670977 | 7091695 | 1107197 | downstream neighbor of SON          | Donson | 288257 | 4,68 | down |
| 6713513 | 7091695 | 1107193 | downstream neighbor of SON          | Donson | 288257 | 2,26 | down |
| 6075582 | 7148904 | 1248292 | DPH3, KTI11 homolog (S. cerevisiae) | Dph3   | 680594 | 1,66 | up   |
| 6146146 | 7148904 | 1248292 | DPH3, KTI11 homolog (S. cerevisiae) | Dph3   | 680594 | 1,22 | up   |
| 6239631 | 7148904 | 1248289 | DPH3, KTI11 homolog (S. cerevisiae) | Dph3   | 680594 | 1,38 | down |
| 6320555 | 7148904 | 1248292 | DPH3, KTI11 homolog (S. cerevisiae) | Dph3   | 680594 | 1,13 | up   |
| 6336368 | 7148904 | 1248294 | DPH3, KTI11 homolog (S. cerevisiae) | Dph3   | 680594 | 1,38 | down |
| 6344651 | 7148904 | 1248290 | DPH3, KTI11 homolog (S. cerevisiae) | Dph3   | 680594 | 1,27 | down |
| 6430962 | 7148904 | 1248294 | DPH3, KTI11 homolog (S. cerevisiae) | Dph3   | 680594 | 1,16 | up   |
| 6431307 | 7148904 | 1248288 | DPH3, KTI11 homolog (S. cerevisiae) | Dph3   | 680594 | 2,05 | down |
| 6461393 | 7148904 | 1248293 | DPH3, KTI11 homolog (S. cerevisiae) | Dph3   | 680594 | 1,17 | up   |
| 6471348 | 7148904 | 1248292 | DPH3, KTI11 homolog (S. cerevisiae) | Dph3   | 680594 | 1,01 | down |
| 6525025 | 7148904 | 1248292 | DPH3, KTI11 homolog (S. cerevisiae) | Dph3   | 680594 | 1,04 | down |
| 6578079 | 7148904 | 1248291 | DPH3, KTI11 homolog (S. cerevisiae) | Dph3   | 680594 | 1,17 | down |
| 6683106 | 7148904 | 1248292 | DPH3, KTI11 homolog (S. cerevisiae) | Dph3   | 680594 | 1,20 | up   |
| 5648471 | 7270397 | 1548132 | dual specificity phosphatase 16     | Dusp16 | 297682 | 1,36 | up   |
| 5723281 | 7270397 | 1548137 | dual specificity phosphatase 16     | Dusp16 | 297682 | 1,39 | up   |
| 5740871 | 7270397 | 1548124 | dual specificity phosphatase 16     | Dusp16 | 297682 | 1,40 | down |
| 5778207 | 7270397 | 1548125 | dual specificity phosphatase 16     | Dusp16 | 297682 | 1,33 | up   |
| 6009947 | 7270397 | 1548129 | dual specificity phosphatase 16     | Dusp16 | 297682 | 1,61 | up   |
| 6261493 | 7270397 | 1548126 | dual specificity phosphatase 16     | Dusp16 | 297682 | 1,54 | up   |
| 6266454 | 7270397 | 1548126 | dual specificity phosphatase 16     | Dusp16 | 297682 | 1,11 | up   |
| 6335314 | 7270397 | 1548126 | dual specificity phosphatase 16     | Dusp16 | 297682 | 2,14 | down |
| 6590078 | 7270397 | 1548136 | dual specificity phosphatase 16     | Dusp16 | 297682 | 1,43 | up   |
| 6616896 | 7270397 | 1548128 | dual specificity phosphatase 16     | Dusp16 | 297682 | 1,70 | up   |

|         |         |         |                                                                   |        |        |      |      |
|---------|---------|---------|-------------------------------------------------------------------|--------|--------|------|------|
| 5683364 | 7152381 | 1256261 | dual specificity phosphatase 26 (putative)                        | Dusp26 | 306527 | 1,36 | down |
| 6020713 | 7152381 | 1256257 | dual specificity phosphatase 26 (putative)                        | Dusp26 | 306527 | 1,07 | down |
| 6115140 | 7152381 | 1256258 | dual specificity phosphatase 26 (putative)                        | Dusp26 | 306527 | 1,31 | up   |
| 6159700 | 7152381 | 1256257 | dual specificity phosphatase 26 (putative)                        | Dusp26 | 306527 | 1,67 | up   |
| 6562819 | 7152381 | 1256257 | dual specificity phosphatase 26 (putative)                        | Dusp26 | 306527 | 2,06 | up   |
| 6633322 | 7152381 | 1256259 | dual specificity phosphatase 26 (putative)                        | Dusp26 | 306527 | 1,00 | down |
| 6686915 | 7152381 | 1256260 | dual specificity phosphatase 26 (putative)                        | Dusp26 | 306527 | 1,65 | down |
| 6725725 | 7152381 | 1256261 | dual specificity phosphatase 26 (putative)                        | Dusp26 | 306527 | 2,12 | down |
| 5870078 | 7378524 | 1817524 | dual specificity phosphatase 9                                    | Dusp9  | 293847 | 1,30 | up   |
| 5973626 | 7378524 | 1817522 | dual specificity phosphatase 9                                    | Dusp9  | 293847 | 1,06 | up   |
| 6025075 | 7378524 | 1817522 | dual specificity phosphatase 9                                    | Dusp9  | 293847 | 1,02 | up   |
| 6030005 | 7378524 | 1817522 | dual specificity phosphatase 9                                    | Dusp9  | 293847 | 1,01 | down |
| 6044539 | 7378524 | 1817522 | dual specificity phosphatase 9                                    | Dusp9  | 293847 | 1,14 | up   |
| 6093647 | 7378524 | 1817524 | dual specificity phosphatase 9                                    | Dusp9  | 293847 | 2,26 | up   |
| 6103145 | 7378524 | 1817523 | dual specificity phosphatase 9                                    | Dusp9  | 293847 | 1,15 | up   |
| 6112564 | 7378524 | 1817524 | dual specificity phosphatase 9                                    | Dusp9  | 293847 | 1,13 | down |
| 6129342 | 7378524 | 1817525 | dual specificity phosphatase 9                                    | Dusp9  | 293847 | 1,30 | down |
| 6135899 | 7378524 | 1817522 | dual specificity phosphatase 9                                    | Dusp9  | 293847 | 1,23 | down |
| 6271944 | 7378524 | 1817521 | dual specificity phosphatase 9                                    | Dusp9  | 293847 | 1,14 | down |
| 6294227 | 7378524 | 1817525 | dual specificity phosphatase 9                                    | Dusp9  | 293847 | 1,76 | down |
| 6388531 | 7378524 | 1817524 | dual specificity phosphatase 9                                    | Dusp9  | 293847 | 1,14 | down |
| 6514457 | 7378524 | 1817522 | dual specificity phosphatase 9                                    | Dusp9  | 293847 | 1,03 | down |
| 5666604 | 7030127 | 960864  | dual-specificity tyrosine-(Y)-phosphorylation regulated kinase 1b | Dyrk1b | 308468 | 1,18 | down |
| 5682533 | 7030127 | 960861  | dual-specificity tyrosine-(Y)-phosphorylation regulated kinase 1b | Dyrk1b | 308468 | 1,24 | up   |
| 5687963 | 7030127 | 960862  | dual-specificity tyrosine-(Y)-phosphorylation regulated kinase 1b | Dyrk1b | 308468 | 1,40 | down |
| 5695977 | 7030127 | 960858  | dual-specificity tyrosine-(Y)-phosphorylation regulated kinase 1b | Dyrk1b | 308468 | 1,61 | up   |
| 5698747 | 7030127 | 960856  | dual-specificity tyrosine-(Y)-phosphorylation regulated kinase 1b | Dyrk1b | 308468 | 1,81 | up   |
| 5964627 | 7030127 | 960868  | dual-specificity tyrosine-(Y)-phosphorylation regulated kinase 1b | Dyrk1b | 308468 | 1,50 | down |
| 5978373 | 7030127 | 960859  | dual-specificity tyrosine-(Y)-phosphorylation regulated kinase 1b | Dyrk1b | 308468 | 1,29 | down |
| 5984108 | 7030127 | 960868  | dual-specificity tyrosine-(Y)-phosphorylation regulated kinase 1b | Dyrk1b | 308468 | 2,53 | up   |
| 6186940 | 7030127 | 960865  | dual-specificity tyrosine-(Y)-phosphorylation regulated kinase 1b | Dyrk1b | 308468 | 1,23 | up   |
| 6375438 | 7030127 | 960868  | dual-specificity tyrosine-(Y)-phosphorylation regulated kinase 1b | Dyrk1b | 308468 | 1,03 | down |
| 6555848 | 7030127 | 960860  | dual-specificity tyrosine-(Y)-phosphorylation regulated kinase 1b | Dyrk1b | 308468 | 1,95 | down |
| 6593116 | 7030127 | 960867  | dual-specificity tyrosine-(Y)-phosphorylation regulated kinase 1b | Dyrk1b | 308468 | 1,03 | up   |
| 6688185 | 7030127 | 960868  | dual-specificity tyrosine-(Y)-phosphorylation regulated kinase 1b | Dyrk1b | 308468 | 1,24 | up   |
| 6714713 | 7030127 | 960864  | dual-specificity tyrosine-(Y)-phosphorylation regulated kinase 1b | Dyrk1b | 308468 | 1,71 | down |
| 5644448 | 7113169 | 1160193 | dynamain 3                                                        | Dnm3   | 171574 | 1,48 | down |
| 5650954 | 7113169 | 1160179 | dynamain 3                                                        | Dnm3   | 171574 | 1,55 | down |
| 5659312 | 7113169 | 1160184 | dynamain 3                                                        | Dnm3   | 171574 | 1,04 | down |
| 5684071 | 7113169 | 1160193 | dynamain 3                                                        | Dnm3   | 171574 | 1,89 | down |
| 5697034 | 7113169 | 1160174 | dynamain 3                                                        | Dnm3   | 171574 | 1,16 | up   |
| 5763214 | 7113169 | 1160177 | dynamain 3                                                        | Dnm3   | 171574 | 1,08 | up   |
| 5771489 | 7113169 | 1160174 | dynamain 3                                                        | Dnm3   | 171574 | 1,13 | down |
| 5771944 | 7113169 | 1160188 | dynamain 3                                                        | Dnm3   | 171574 | 1,31 | down |
| 5799664 | 7113169 | 1160174 | dynamain 3                                                        | Dnm3   | 171574 | 1,90 | down |
| 5968420 | 7113169 | 1160175 | dynamain 3                                                        | Dnm3   | 171574 | 1,71 | up   |
| 6004997 | 7113169 | 1160186 | dynamain 3                                                        | Dnm3   | 171574 | 1,18 | up   |
| 6040655 | 7113169 | 1160172 | dynamain 3                                                        | Dnm3   | 171574 | 1,02 | up   |
| 6049928 | 7113169 | 1160178 | dynamain 3                                                        | Dnm3   | 171574 | 1,08 | down |
| 6055872 | 7113169 | 1160185 | dynamain 3                                                        | Dnm3   | 171574 | 1,15 | down |
| 6061791 | 7113169 | 1160175 | dynamain 3                                                        | Dnm3   | 171574 | 2,19 | down |
| 6302037 | 7113169 | 1160192 | dynamain 3                                                        | Dnm3   | 171574 | 1,26 | up   |
| 6383892 | 7113169 | 1160181 | dynamain 3                                                        | Dnm3   | 171574 | 1,43 | up   |
| 6470809 | 7113169 | 1160190 | dynamain 3                                                        | Dnm3   | 171574 | 1,04 | down |
| 6513105 | 7113169 | 1160180 | dynamain 3                                                        | Dnm3   | 171574 | 1,17 | up   |
| 6531655 | 7113169 | 1160182 | dynamain 3                                                        | Dnm3   | 171574 | 1,28 | up   |

|         |         |         |                                    |         |        |      |      |
|---------|---------|---------|------------------------------------|---------|--------|------|------|
| 6589493 | 7113169 | 1160175 | dynamlin 3                         | Dnm3    | 171574 | 1,13 | down |
| 6620487 | 7113169 | 1160189 | dynamlin 3                         | Dnm3    | 171574 | 1,70 | up   |
| 6641411 | 7113169 | 1160187 | dynamlin 3                         | Dnm3    | 171574 | 1,49 | up   |
| 6647235 | 7113169 | 1160172 | dynamlin 3                         | Dnm3    | 171574 | 1,28 | down |
| 6662428 | 7113169 | 1160173 | dynamlin 3                         | Dnm3    | 171574 | 1,58 | up   |
| 6678541 | 7113169 | 1160183 | dynamlin 3                         | Dnm3    | 171574 | 1,18 | down |
| 6687289 | 7113169 | 1160191 | dynamlin 3                         | Dnm3    | 171574 | 1,03 | up   |
| 6694062 | 7113169 | 1160176 | dynamlin 3                         | Dnm3    | 171574 | 1,09 | up   |
| 5651291 | 7341958 | 1724910 | dynein cytoplasmic 2 heavy chain 1 | Dync2h1 | 65209  | 1,04 | up   |
| 5658038 | 7341958 | 1724871 | dynein cytoplasmic 2 heavy chain 1 | Dync2h1 | 65209  | 1,37 | down |
| 5658856 | 7341958 | 1724864 | dynein cytoplasmic 2 heavy chain 1 | Dync2h1 | 65209  | 1,22 | up   |
| 5668465 | 7341958 | 1724878 | dynein cytoplasmic 2 heavy chain 1 | Dync2h1 | 65209  | 1,18 | down |
| 5684360 | 7341958 | 1724932 | dynein cytoplasmic 2 heavy chain 1 | Dync2h1 | 65209  | 1,01 | up   |
| 5692975 | 7341958 | 1724927 | dynein cytoplasmic 2 heavy chain 1 | Dync2h1 | 65209  | 1,17 | down |
| 5702530 | 7341958 | 1724890 | dynein cytoplasmic 2 heavy chain 1 | Dync2h1 | 65209  | 1,24 | up   |
| 5715951 | 7341958 | 1724906 | dynein cytoplasmic 2 heavy chain 1 | Dync2h1 | 65209  | 1,06 | down |
| 5717826 | 7341958 | 1724893 | dynein cytoplasmic 2 heavy chain 1 | Dync2h1 | 65209  | 1,21 | up   |
| 5729938 | 7341958 | 1724874 | dynein cytoplasmic 2 heavy chain 1 | Dync2h1 | 65209  | 1,06 | down |
| 5758738 | 7341958 | 1724891 | dynein cytoplasmic 2 heavy chain 1 | Dync2h1 | 65209  | 1,32 | down |
| 5776526 | 7341958 | 1724883 | dynein cytoplasmic 2 heavy chain 1 | Dync2h1 | 65209  | 1,19 | down |
| 5793480 | 7341958 | 1724867 | dynein cytoplasmic 2 heavy chain 1 | Dync2h1 | 65209  | 1,26 | down |
| 5807938 | 7341958 | 1724880 | dynein cytoplasmic 2 heavy chain 1 | Dync2h1 | 65209  | 1,32 | down |
| 5820112 | 7341958 | 1724925 | dynein cytoplasmic 2 heavy chain 1 | Dync2h1 | 65209  | 1,21 | up   |
| 5829016 | 7341958 | 1724940 | dynein cytoplasmic 2 heavy chain 1 | Dync2h1 | 65209  | 1,30 | down |
| 5829549 | 7341958 | 1724888 | dynein cytoplasmic 2 heavy chain 1 | Dync2h1 | 65209  | 1,81 | down |
| 5837033 | 7341958 | 1724865 | dynein cytoplasmic 2 heavy chain 1 | Dync2h1 | 65209  | 1,16 | down |
| 5842887 | 7341958 | 1724905 | dynein cytoplasmic 2 heavy chain 1 | Dync2h1 | 65209  | 1,11 | up   |
| 5844254 | 7341958 | 1724909 | dynein cytoplasmic 2 heavy chain 1 | Dync2h1 | 65209  | 1,10 | up   |
| 5849339 | 7341958 | 1724908 | dynein cytoplasmic 2 heavy chain 1 | Dync2h1 | 65209  | 1,33 | down |
| 5871278 | 7341958 | 1724868 | dynein cytoplasmic 2 heavy chain 1 | Dync2h1 | 65209  | 1,10 | up   |
| 5871606 | 7341958 | 1724923 | dynein cytoplasmic 2 heavy chain 1 | Dync2h1 | 65209  | 1,08 | down |
| 5872673 | 7341958 | 1724863 | dynein cytoplasmic 2 heavy chain 1 | Dync2h1 | 65209  | 1,02 | down |
| 5885933 | 7341958 | 1724899 | dynein cytoplasmic 2 heavy chain 1 | Dync2h1 | 65209  | 1,27 | up   |
| 5908892 | 7341958 | 1724922 | dynein cytoplasmic 2 heavy chain 1 | Dync2h1 | 65209  | 1,28 | down |
| 5916736 | 7341958 | 1724936 | dynein cytoplasmic 2 heavy chain 1 | Dync2h1 | 65209  | 1,25 | up   |
| 5930211 | 7341958 | 1724917 | dynein cytoplasmic 2 heavy chain 1 | Dync2h1 | 65209  | 1,13 | down |
| 5942091 | 7341958 | 1724920 | dynein cytoplasmic 2 heavy chain 1 | Dync2h1 | 65209  | 1,81 | down |
| 5948194 | 7341958 | 1724898 | dynein cytoplasmic 2 heavy chain 1 | Dync2h1 | 65209  | 1,54 | up   |
| 5963828 | 7341958 | 1724934 | dynein cytoplasmic 2 heavy chain 1 | Dync2h1 | 65209  | 1,02 | up   |
| 5967571 | 7341958 | 1724877 | dynein cytoplasmic 2 heavy chain 1 | Dync2h1 | 65209  | 1,14 | up   |
| 5972479 | 7341958 | 1724933 | dynein cytoplasmic 2 heavy chain 1 | Dync2h1 | 65209  | 1,09 | down |
| 6003291 | 7341958 | 1724918 | dynein cytoplasmic 2 heavy chain 1 | Dync2h1 | 65209  | 1,11 | down |
| 6011086 | 7341958 | 1724902 | dynein cytoplasmic 2 heavy chain 1 | Dync2h1 | 65209  | 1,84 | up   |
| 6026216 | 7341958 | 1724925 | dynein cytoplasmic 2 heavy chain 1 | Dync2h1 | 65209  | 1,40 | up   |
| 6029328 | 7341958 | 1724902 | dynein cytoplasmic 2 heavy chain 1 | Dync2h1 | 65209  | 1,14 | up   |
| 6036434 | 7341958 | 1724915 | dynein cytoplasmic 2 heavy chain 1 | Dync2h1 | 65209  | 1,15 | up   |
| 6044447 | 7341958 | 1724886 | dynein cytoplasmic 2 heavy chain 1 | Dync2h1 | 65209  | 1,11 | down |
| 6068207 | 7341958 | 1724935 | dynein cytoplasmic 2 heavy chain 1 | Dync2h1 | 65209  | 1,12 | down |
| 6068251 | 7341958 | 1724904 | dynein cytoplasmic 2 heavy chain 1 | Dync2h1 | 65209  | 1,16 | down |
| 6080348 | 7341958 | 1724866 | dynein cytoplasmic 2 heavy chain 1 | Dync2h1 | 65209  | 1,51 | up   |
| 6097613 | 7341958 | 1724881 | dynein cytoplasmic 2 heavy chain 1 | Dync2h1 | 65209  | 1,03 | up   |
| 6102425 | 7341958 | 1724929 | dynein cytoplasmic 2 heavy chain 1 | Dync2h1 | 65209  | 1,08 | up   |
| 6110443 | 7341958 | 1724862 | dynein cytoplasmic 2 heavy chain 1 | Dync2h1 | 65209  | 1,63 | down |
| 6127044 | 7341958 | 1724872 | dynein cytoplasmic 2 heavy chain 1 | Dync2h1 | 65209  | 1,06 | up   |
| 6158507 | 7341958 | 1724941 | dynein cytoplasmic 2 heavy chain 1 | Dync2h1 | 65209  | 1,38 | down |
| 6189846 | 7341958 | 1724913 | dynein cytoplasmic 2 heavy chain 1 | Dync2h1 | 65209  | 1,33 | up   |

|         |         |         |                                    |         |        |      |      |
|---------|---------|---------|------------------------------------|---------|--------|------|------|
| 6201376 | 7341958 | 1724928 | dynein cytoplasmic 2 heavy chain 1 | Dync2h1 | 65209  | 1,31 | up   |
| 6202864 | 7341958 | 1724910 | dynein cytoplasmic 2 heavy chain 1 | Dync2h1 | 65209  | 1,18 | down |
| 6205844 | 7341958 | 1724907 | dynein cytoplasmic 2 heavy chain 1 | Dync2h1 | 65209  | 1,38 | down |
| 6214464 | 7341958 | 1724940 | dynein cytoplasmic 2 heavy chain 1 | Dync2h1 | 65209  | 1,34 | up   |
| 6215898 | 7341958 | 1724930 | dynein cytoplasmic 2 heavy chain 1 | Dync2h1 | 65209  | 1,16 | down |
| 6217980 | 7341958 | 1724859 | dynein cytoplasmic 2 heavy chain 1 | Dync2h1 | 65209  | 1,85 | up   |
| 6234683 | 7341958 | 1724870 | dynein cytoplasmic 2 heavy chain 1 | Dync2h1 | 65209  | 1,21 | up   |
| 6242208 | 7341958 | 1724912 | dynein cytoplasmic 2 heavy chain 1 | Dync2h1 | 65209  | 1,13 | up   |
| 6242694 | 7341958 | 1724914 | dynein cytoplasmic 2 heavy chain 1 | Dync2h1 | 65209  | 1,15 | down |
| 6280455 | 7341958 | 1724894 | dynein cytoplasmic 2 heavy chain 1 | Dync2h1 | 65209  | 2,24 | up   |
| 6282966 | 7341958 | 1724901 | dynein cytoplasmic 2 heavy chain 1 | Dync2h1 | 65209  | 1,25 | up   |
| 6284786 | 7341958 | 1724885 | dynein cytoplasmic 2 heavy chain 1 | Dync2h1 | 65209  | 1,18 | up   |
| 6292574 | 7341958 | 1724856 | dynein cytoplasmic 2 heavy chain 1 | Dync2h1 | 65209  | 1,16 | down |
| 6297447 | 7341958 | 1724900 | dynein cytoplasmic 2 heavy chain 1 | Dync2h1 | 65209  | 1,43 | down |
| 6320297 | 7341958 | 1724864 | dynein cytoplasmic 2 heavy chain 1 | Dync2h1 | 65209  | 1,30 | down |
| 6344873 | 7341958 | 1724879 | dynein cytoplasmic 2 heavy chain 1 | Dync2h1 | 65209  | 1,16 | down |
| 6375019 | 7341958 | 1724895 | dynein cytoplasmic 2 heavy chain 1 | Dync2h1 | 65209  | 1,63 | up   |
| 6378332 | 7341958 | 1724861 | dynein cytoplasmic 2 heavy chain 1 | Dync2h1 | 65209  | 1,12 | up   |
| 6408902 | 7341958 | 1724937 | dynein cytoplasmic 2 heavy chain 1 | Dync2h1 | 65209  | 1,18 | down |
| 6436544 | 7341958 | 1724882 | dynein cytoplasmic 2 heavy chain 1 | Dync2h1 | 65209  | 1,50 | up   |
| 6453372 | 7341958 | 1724887 | dynein cytoplasmic 2 heavy chain 1 | Dync2h1 | 65209  | 1,53 | up   |
| 6479007 | 7341958 | 1724903 | dynein cytoplasmic 2 heavy chain 1 | Dync2h1 | 65209  | 1,17 | down |
| 6479342 | 7341958 | 1724896 | dynein cytoplasmic 2 heavy chain 1 | Dync2h1 | 65209  | 1,42 | down |
| 6483710 | 7341958 | 1724938 | dynein cytoplasmic 2 heavy chain 1 | Dync2h1 | 65209  | 1,03 | down |
| 6488952 | 7341958 | 1724884 | dynein cytoplasmic 2 heavy chain 1 | Dync2h1 | 65209  | 1,17 | up   |
| 6490655 | 7341958 | 1724895 | dynein cytoplasmic 2 heavy chain 1 | Dync2h1 | 65209  | 1,12 | up   |
| 6521692 | 7341958 | 1724914 | dynein cytoplasmic 2 heavy chain 1 | Dync2h1 | 65209  | 1,10 | down |
| 6523632 | 7341958 | 1724860 | dynein cytoplasmic 2 heavy chain 1 | Dync2h1 | 65209  | 1,47 | up   |
| 6544678 | 7341958 | 1724924 | dynein cytoplasmic 2 heavy chain 1 | Dync2h1 | 65209  | 1,20 | up   |
| 6552315 | 7341958 | 1724931 | dynein cytoplasmic 2 heavy chain 1 | Dync2h1 | 65209  | 1,04 | up   |
| 6555997 | 7341958 | 1724921 | dynein cytoplasmic 2 heavy chain 1 | Dync2h1 | 65209  | 1,91 | down |
| 6561947 | 7341958 | 1724926 | dynein cytoplasmic 2 heavy chain 1 | Dync2h1 | 65209  | 1,11 | up   |
| 6567683 | 7341958 | 1724876 | dynein cytoplasmic 2 heavy chain 1 | Dync2h1 | 65209  | 1,02 | up   |
| 6582933 | 7341958 | 1724889 | dynein cytoplasmic 2 heavy chain 1 | Dync2h1 | 65209  | 1,01 | up   |
| 6584192 | 7341958 | 1724911 | dynein cytoplasmic 2 heavy chain 1 | Dync2h1 | 65209  | 1,11 | down |
| 6586561 | 7341958 | 1724875 | dynein cytoplasmic 2 heavy chain 1 | Dync2h1 | 65209  | 1,13 | down |
| 6590108 | 7341958 | 1724892 | dynein cytoplasmic 2 heavy chain 1 | Dync2h1 | 65209  | 1,14 | up   |
| 6592290 | 7341958 | 1724857 | dynein cytoplasmic 2 heavy chain 1 | Dync2h1 | 65209  | 1,27 | up   |
| 6636401 | 7341958 | 1724897 | dynein cytoplasmic 2 heavy chain 1 | Dync2h1 | 65209  | 1,27 | up   |
| 6663920 | 7341958 | 1724916 | dynein cytoplasmic 2 heavy chain 1 | Dync2h1 | 65209  | 1,29 | down |
| 6676940 | 7341958 | 1724858 | dynein cytoplasmic 2 heavy chain 1 | Dync2h1 | 65209  | 1,31 | up   |
| 6681831 | 7341958 | 1724873 | dynein cytoplasmic 2 heavy chain 1 | Dync2h1 | 65209  | 1,11 | down |
| 6686448 | 7341958 | 1724919 | dynein cytoplasmic 2 heavy chain 1 | Dync2h1 | 65209  | 1,36 | up   |
| 6689413 | 7341958 | 1724869 | dynein cytoplasmic 2 heavy chain 1 | Dync2h1 | 65209  | 1,24 | down |
| 6697093 | 7341958 | 1724939 | dynein cytoplasmic 2 heavy chain 1 | Dync2h1 | 65209  | 1,06 | down |
| 6727599 | 7341958 | 1724906 | dynein cytoplasmic 2 heavy chain 1 | Dync2h1 | 65209  | 1,13 | down |
| 6732672 | 7341958 | 1724941 | dynein cytoplasmic 2 heavy chain 1 | Dync2h1 | 65209  | 1,36 | down |
| 5680248 | 7046264 | 1001473 | dynein light chain Tctex-type 1    | Dynlt1  | 83462  | 1,15 | up   |
| 6204488 | 7046264 | 1001470 | dynein light chain Tctex-type 1    | Dynlt1  | 83462  | 1,42 | up   |
| 6271682 | 7046264 | 1001472 | dynein light chain Tctex-type 1    | Dynlt1  | 83462  | 1,10 | up   |
| 6282658 | 7046264 | 1001475 | dynein light chain Tctex-type 1    | Dynlt1  | 83462  | 3,43 | down |
| 6358001 | 7046264 | 1001471 | dynein light chain Tctex-type 1    | Dynlt1  | 83462  | 1,08 | up   |
| 6520067 | 7046264 | 1001474 | dynein light chain Tctex-type 1    | Dynlt1  | 83462  | 1,12 | down |
| 5695640 | 7373587 | 1805620 | dynein light chain Tctex-type 3    | Dynlt3  | 363448 | 2,35 | up   |
| 5717429 | 7373587 | 1805617 | dynein light chain Tctex-type 3    | Dynlt3  | 363448 | 1,13 | up   |
| 5786582 | 7373587 | 1805620 | dynein light chain Tctex-type 3    | Dynlt3  | 363448 | 1,05 | down |

|         |         |         |                                  |        |        |      |      |
|---------|---------|---------|----------------------------------|--------|--------|------|------|
| 5822779 | 7373587 | 1805615 | dynein light chain Tctex-type 3  | Dynlt3 | 363448 | 1,12 | down |
| 6087767 | 7373587 | 1805620 | dynein light chain Tctex-type 3  | Dynlt3 | 363448 | 1,02 | up   |
| 6125467 | 7373587 | 1805616 | dynein light chain Tctex-type 3  | Dynlt3 | 363448 | 1,06 | down |
| 6243690 | 7373587 | 1805619 | dynein light chain Tctex-type 3  | Dynlt3 | 363448 | 1,60 | down |
| 6685300 | 7373587 | 1805618 | dynein light chain Tctex-type 3  | Dynlt3 | 363448 | 1,02 | up   |
| 5641763 | 7084792 | 1090355 | dynein, axonemal, heavy chain 17 | Dnah17 | 287845 | 1,35 | down |
| 5660132 | 7084792 | 1090348 | dynein, axonemal, heavy chain 17 | Dnah17 | 287845 | 1,12 | up   |
| 5691082 | 7084792 | 1090322 | dynein, axonemal, heavy chain 17 | Dnah17 | 287845 | 1,88 | down |
| 5707272 | 7084792 | 1090323 | dynein, axonemal, heavy chain 17 | Dnah17 | 287845 | 1,12 | up   |
| 5721626 | 7084792 | 1090320 | dynein, axonemal, heavy chain 17 | Dnah17 | 287845 | 1,14 | down |
| 5737709 | 7084792 | 1090350 | dynein, axonemal, heavy chain 17 | Dnah17 | 287845 | 1,57 | down |
| 5755748 | 7084792 | 1090330 | dynein, axonemal, heavy chain 17 | Dnah17 | 287845 | 1,76 | down |
| 5788559 | 7084792 | 1090331 | dynein, axonemal, heavy chain 17 | Dnah17 | 287845 | 1,44 | up   |
| 5848419 | 7084792 | 1090328 | dynein, axonemal, heavy chain 17 | Dnah17 | 287845 | 1,05 | up   |
| 5858124 | 7084792 | 1090349 | dynein, axonemal, heavy chain 17 | Dnah17 | 287845 | 1,94 | up   |
| 5939635 | 7084792 | 1090325 | dynein, axonemal, heavy chain 17 | Dnah17 | 287845 | 1,09 | down |
| 5961880 | 7084792 | 1090324 | dynein, axonemal, heavy chain 17 | Dnah17 | 287845 | 1,12 | down |
| 5986280 | 7084792 | 1090320 | dynein, axonemal, heavy chain 17 | Dnah17 | 287845 | 1,42 | down |
| 5995495 | 7084792 | 1090332 | dynein, axonemal, heavy chain 17 | Dnah17 | 287845 | 1,11 | up   |
| 6020605 | 7084792 | 1090334 | dynein, axonemal, heavy chain 17 | Dnah17 | 287845 | 1,07 | up   |
| 6031419 | 7084792 | 1090343 | dynein, axonemal, heavy chain 17 | Dnah17 | 287845 | 1,75 | down |
| 6167620 | 7084792 | 1090342 | dynein, axonemal, heavy chain 17 | Dnah17 | 287845 | 1,43 | down |
| 6194173 | 7084792 | 1090352 | dynein, axonemal, heavy chain 17 | Dnah17 | 287845 | 1,17 | up   |
| 6253641 | 7084792 | 1090326 | dynein, axonemal, heavy chain 17 | Dnah17 | 287845 | 1,09 | down |
| 6274912 | 7084792 | 1090353 | dynein, axonemal, heavy chain 17 | Dnah17 | 287845 | 1,27 | down |
| 6303238 | 7084792 | 1090354 | dynein, axonemal, heavy chain 17 | Dnah17 | 287845 | 1,50 | down |
| 6358718 | 7084792 | 1090335 | dynein, axonemal, heavy chain 17 | Dnah17 | 287845 | 1,02 | down |
| 6364087 | 7084792 | 1090346 | dynein, axonemal, heavy chain 17 | Dnah17 | 287845 | 1,09 | up   |
| 6368355 | 7084792 | 1090338 | dynein, axonemal, heavy chain 17 | Dnah17 | 287845 | 1,01 | up   |
| 6370621 | 7084792 | 1090358 | dynein, axonemal, heavy chain 17 | Dnah17 | 287845 | 1,42 | down |
| 6371978 | 7084792 | 1090337 | dynein, axonemal, heavy chain 17 | Dnah17 | 287845 | 1,07 | up   |
| 6404467 | 7084792 | 1090356 | dynein, axonemal, heavy chain 17 | Dnah17 | 287845 | 1,24 | down |
| 6434953 | 7084792 | 1090345 | dynein, axonemal, heavy chain 17 | Dnah17 | 287845 | 1,02 | up   |
| 6445768 | 7084792 | 1090327 | dynein, axonemal, heavy chain 17 | Dnah17 | 287845 | 2,35 | up   |
| 6458626 | 7084792 | 1090359 | dynein, axonemal, heavy chain 17 | Dnah17 | 287845 | 1,55 | down |
| 6498235 | 7084792 | 1090333 | dynein, axonemal, heavy chain 17 | Dnah17 | 287845 | 1,17 | down |
| 6517275 | 7084792 | 1090360 | dynein, axonemal, heavy chain 17 | Dnah17 | 287845 | 1,29 | down |
| 6596019 | 7084792 | 1090336 | dynein, axonemal, heavy chain 17 | Dnah17 | 287845 | 1,12 | up   |
| 6667804 | 7084792 | 1090344 | dynein, axonemal, heavy chain 17 | Dnah17 | 287845 | 1,10 | down |
| 6668823 | 7084792 | 1090347 | dynein, axonemal, heavy chain 17 | Dnah17 | 287845 | 1,06 | up   |
| 6705708 | 7084792 | 1090357 | dynein, axonemal, heavy chain 17 | Dnah17 | 287845 | 1,20 | down |
| 6743469 | 7084792 | 1090321 | dynein, axonemal, heavy chain 17 | Dnah17 | 287845 | 1,09 | up   |
| 5620888 | 7255522 | 1511399 | dysferlin                        | Dysf   | 312492 | 1,07 | up   |
| 5651052 | 7255522 | 1511412 | dysferlin                        | Dysf   | 312492 | 1,01 | up   |
| 5653569 | 7255522 | 1511400 | dysferlin                        | Dysf   | 312492 | 1,09 | up   |
| 5658181 | 7255522 | 1511438 | dysferlin                        | Dysf   | 312492 | 1,65 | up   |
| 5699977 | 7255522 | 1511445 | dysferlin                        | Dysf   | 312492 | 1,01 | up   |
| 5739264 | 7255522 | 1511431 | dysferlin                        | Dysf   | 312492 | 1,04 | down |
| 5741670 | 7255522 | 1511397 | dysferlin                        | Dysf   | 312492 | 1,21 | down |
| 5752676 | 7255522 | 1511437 | dysferlin                        | Dysf   | 312492 | 1,37 | up   |
| 5761045 | 7255522 | 1511435 | dysferlin                        | Dysf   | 312492 | 1,11 | down |
| 5765792 | 7255522 | 1511441 | dysferlin                        | Dysf   | 312492 | 1,03 | up   |
| 5793017 | 7255522 | 1511406 | dysferlin                        | Dysf   | 312492 | 1,32 | up   |
| 5800533 | 7255522 | 1511392 | dysferlin                        | Dysf   | 312492 | 1,30 | down |
| 5820197 | 7255522 | 1511405 | dysferlin                        | Dysf   | 312492 | 1,16 | down |
| 5863570 | 7255522 | 1511439 | dysferlin                        | Dysf   | 312492 | 1,14 | up   |

|         |         |         |                     |           |        |      |      |
|---------|---------|---------|---------------------|-----------|--------|------|------|
| 5883687 | 7255522 | 1511394 | dysferlin           | Dysf      | 312492 | 1,33 | down |
| 5895526 | 7255522 | 1511430 | dysferlin           | Dysf      | 312492 | 1,04 | up   |
| 5907081 | 7255522 | 1511398 | dysferlin           | Dysf      | 312492 | 1,23 | down |
| 5925271 | 7255522 | 1511443 | dysferlin           | Dysf      | 312492 | 1,47 | down |
| 5928579 | 7255522 | 1511434 | dysferlin           | Dysf      | 312492 | 1,15 | up   |
| 6062672 | 7255522 | 1511424 | dysferlin           | Dysf      | 312492 | 1,06 | up   |
| 6065374 | 7255522 | 1511427 | dysferlin           | Dysf      | 312492 | 1,03 | up   |
| 6078115 | 7255522 | 1511396 | dysferlin           | Dysf      | 312492 | 1,24 | down |
| 6111279 | 7255522 | 1511448 | dysferlin           | Dysf      | 312492 | 1,14 | down |
| 6123826 | 7255522 | 1511432 | dysferlin           | Dysf      | 312492 | 3,30 | down |
| 6152009 | 7255522 | 1511388 | dysferlin           | Dysf      | 312492 | 1,85 | down |
| 6172479 | 7255522 | 1511421 | dysferlin           | Dysf      | 312492 | 1,32 | down |
| 6184841 | 7255522 | 1511436 | dysferlin           | Dysf      | 312492 | 1,04 | up   |
| 6206117 | 7255522 | 1511422 | dysferlin           | Dysf      | 312492 | 1,00 | down |
| 6237336 | 7255522 | 1511402 | dysferlin           | Dysf      | 312492 | 1,10 | down |
| 6258031 | 7255522 | 1511447 | dysferlin           | Dysf      | 312492 | 1,03 | down |
| 6287836 | 7255522 | 1511391 | dysferlin           | Dysf      | 312492 | 1,07 | up   |
| 6290846 | 7255522 | 1511425 | dysferlin           | Dysf      | 312492 | 1,42 | down |
| 6311673 | 7255522 | 1511417 | dysferlin           | Dysf      | 312492 | 1,02 | down |
| 6340637 | 7255522 | 1511418 | dysferlin           | Dysf      | 312492 | 1,46 | down |
| 6370749 | 7255522 | 1511404 | dysferlin           | Dysf      | 312492 | 1,09 | up   |
| 6387919 | 7255522 | 1511414 | dysferlin           | Dysf      | 312492 | 1,85 | up   |
| 6392024 | 7255522 | 1511446 | dysferlin           | Dysf      | 312492 | 1,11 | up   |
| 6400474 | 7255522 | 1511395 | dysferlin           | Dysf      | 312492 | 1,06 | down |
| 6402524 | 7255522 | 1511447 | dysferlin           | Dysf      | 312492 | 1,18 | down |
| 6414617 | 7255522 | 1511413 | dysferlin           | Dysf      | 312492 | 1,30 | up   |
| 6427600 | 7255522 | 1511416 | dysferlin           | Dysf      | 312492 | 1,03 | up   |
| 6461904 | 7255522 | 1511442 | dysferlin           | Dysf      | 312492 | 1,40 | up   |
| 6489486 | 7255522 | 1511426 | dysferlin           | Dysf      | 312492 | 1,12 | up   |
| 6489524 | 7255522 | 1511390 | dysferlin           | Dysf      | 312492 | 1,33 | up   |
| 6505561 | 7255522 | 1511444 | dysferlin           | Dysf      | 312492 | 1,08 | down |
| 6534952 | 7255522 | 1511429 | dysferlin           | Dysf      | 312492 | 1,30 | up   |
| 6587369 | 7255522 | 1511407 | dysferlin           | Dysf      | 312492 | 1,05 | up   |
| 6592216 | 7255522 | 1511408 | dysferlin           | Dysf      | 312492 | 1,08 | up   |
| 6646999 | 7255522 | 1511440 | dysferlin           | Dysf      | 312492 | 1,06 | down |
| 6679059 | 7255522 | 1511415 | dysferlin           | Dysf      | 312492 | 1,01 | down |
| 6715770 | 7255522 | 1511393 | dysferlin           | Dysf      | 312492 | 1,40 | up   |
| 5827968 | 7237514 | 1466954 | dystonia 1          | Dyt1      | 266606 | 1,40 | down |
| 5866080 | 7237514 | 1466956 | dystonia 1          | Dyt1      | 266606 | 1,00 | down |
| 6045974 | 7237514 | 1466958 | dystonia 1          | Dyt1      | 266606 | 3,11 | up   |
| 6046505 | 7237514 | 1466958 | dystonia 1          | Dyt1      | 266606 | 1,01 | up   |
| 6190183 | 7237514 | 1466957 | dystonia 1          | Dyt1      | 266606 | 1,11 | down |
| 6305301 | 7237514 | 1466957 | dystonia 1          | Dyt1      | 266606 | 1,23 | down |
| 6386388 | 7237514 | 1466953 | dystonia 1          | Dyt1      | 266606 | 1,46 | down |
| 6406917 | 7237514 | 1466955 | dystonia 1          | Dyt1      | 266606 | 1,15 | down |
| 5673513 | 7072419 | 1061841 | E2F1-inducible gene | LOC303566 | 303566 | 1,58 | down |
| 5680351 | 7072419 | 1061841 | E2F1-inducible gene | LOC303566 | 303566 | 1,52 | down |
| 5738301 | 7072419 | 1061840 | E2F1-inducible gene | LOC303566 | 303566 | 1,09 | up   |
| 5934722 | 7072419 | 1061846 | E2F1-inducible gene | LOC303566 | 303566 | 1,07 | up   |
| 6090544 | 7072419 | 1061848 | E2F1-inducible gene | LOC303566 | 303566 | 1,14 | down |
| 6212383 | 7072419 | 1061847 | E2F1-inducible gene | LOC303566 | 303566 | 1,01 | up   |
| 6218946 | 7072419 | 1061841 | E2F1-inducible gene | LOC303566 | 303566 | 1,13 | up   |
| 6334596 | 7072419 | 1061845 | E2F1-inducible gene | LOC303566 | 303566 | 1,08 | up   |
| 6470221 | 7072419 | 1061848 | E2F1-inducible gene | LOC303566 | 303566 | 1,10 | up   |
| 6578702 | 7072419 | 1061843 | E2F1-inducible gene | LOC303566 | 303566 | 1,01 | down |
| 6597897 | 7072419 | 1061841 | E2F1-inducible gene | LOC303566 | 303566 | 1,25 | up   |

|         |         |         |                                                  |           |        |      |      |
|---------|---------|---------|--------------------------------------------------|-----------|--------|------|------|
| 6622008 | 7072419 | 1061844 | E2F1-inducible gene                              | LOC303566 | 303566 | 1,03 | up   |
| 6645435 | 7072419 | 1061841 | E2F1-inducible gene                              | LOC303566 | 303566 | 2,54 | up   |
| 6664573 | 7072419 | 1061842 | E2F1-inducible gene                              | LOC303566 | 303566 | 1,23 | down |
| 6694765 | 7072419 | 1061848 | E2F1-inducible gene                              | LOC303566 | 303566 | 1,73 | down |
| 5733335 | 7111427 | 1155772 | E74-like factor 3                                | Elf3      | 304815 | 1,05 | up   |
| 5777413 | 7111427 | 1155765 | E74-like factor 3                                | Elf3      | 304815 | 1,14 | up   |
| 5839054 | 7111427 | 1155773 | E74-like factor 3                                | Elf3      | 304815 | 2,55 | down |
| 5854651 | 7111427 | 1155769 | E74-like factor 3                                | Elf3      | 304815 | 1,34 | down |
| 5972504 | 7111427 | 1155770 | E74-like factor 3                                | Elf3      | 304815 | 1,08 | up   |
| 6032151 | 7111427 | 1155766 | E74-like factor 3                                | Elf3      | 304815 | 1,11 | up   |
| 6258373 | 7111427 | 1155767 | E74-like factor 3                                | Elf3      | 304815 | 1,14 | up   |
| 6387960 | 7111427 | 1155764 | E74-like factor 3                                | Elf3      | 304815 | 1,58 | down |
| 6574964 | 7111427 | 1155771 | E74-like factor 3                                | Elf3      | 304815 | 1,59 | down |
| 6617361 | 7111427 | 1155768 | E74-like factor 3                                | Elf3      | 304815 | 1,51 | up   |
| 6681541 | 7111427 | 1155771 | E74-like factor 3                                | Elf3      | 304815 | 2,36 | up   |
| 5776721 | 7066764 | 1048144 | early B-cell factor 1                            | Ebf1      | 116543 | 1,21 | up   |
| 5800689 | 7066764 | 1048145 | early B-cell factor 1                            | Ebf1      | 116543 | 1,46 | up   |
| 5927198 | 7066764 | 1048148 | early B-cell factor 1                            | Ebf1      | 116543 | 1,04 | down |
| 5943542 | 7066764 | 1048146 | early B-cell factor 1                            | Ebf1      | 116543 | 1,22 | down |
| 5964921 | 7066764 | 1048155 | early B-cell factor 1                            | Ebf1      | 116543 | 1,02 | down |
| 6022842 | 7066764 | 1048150 | early B-cell factor 1                            | Ebf1      | 116543 | 1,50 | down |
| 6193406 | 7066764 | 1048159 | early B-cell factor 1                            | Ebf1      | 116543 | 2,05 | down |
| 6220984 | 7066764 | 1048144 | early B-cell factor 1                            | Ebf1      | 116543 | 1,02 | up   |
| 6232939 | 7066764 | 1048151 | early B-cell factor 1                            | Ebf1      | 116543 | 1,17 | up   |
| 6246559 | 7066764 | 1048156 | early B-cell factor 1                            | Ebf1      | 116543 | 1,05 | up   |
| 6254457 | 7066764 | 1048152 | early B-cell factor 1                            | Ebf1      | 116543 | 1,03 | down |
| 6266122 | 7066764 | 1048153 | early B-cell factor 1                            | Ebf1      | 116543 | 1,26 | up   |
| 6337898 | 7066764 | 1048149 | early B-cell factor 1                            | Ebf1      | 116543 | 1,23 | down |
| 6449387 | 7066764 | 1048157 | early B-cell factor 1                            | Ebf1      | 116543 | 1,22 | up   |
| 6545629 | 7066764 | 1048147 | early B-cell factor 1                            | Ebf1      | 116543 | 1,20 | down |
| 6551451 | 7066764 | 1048154 | early B-cell factor 1                            | Ebf1      | 116543 | 1,47 | down |
| 6581605 | 7066764 | 1048158 | early B-cell factor 1                            | Ebf1      | 116543 | 1,09 | down |
| 5671660 | 7029395 | 959450  | echinoderm microtubule associated protein like 2 | Eml2      | 192360 | 2,01 | down |
| 5716844 | 7029395 | 959444  | echinoderm microtubule associated protein like 2 | Eml2      | 192360 | 1,27 | down |
| 5717653 | 7029395 | 959449  | echinoderm microtubule associated protein like 2 | Eml2      | 192360 | 1,09 | up   |
| 5749449 | 7029395 | 959437  | echinoderm microtubule associated protein like 2 | Eml2      | 192360 | 1,07 | down |
| 5752561 | 7029395 | 959430  | echinoderm microtubule associated protein like 2 | Eml2      | 192360 | 1,09 | down |
| 5788679 | 7029395 | 959431  | echinoderm microtubule associated protein like 2 | Eml2      | 192360 | 1,04 | down |
| 5816762 | 7029395 | 959430  | echinoderm microtubule associated protein like 2 | Eml2      | 192360 | 1,03 | down |
| 5845555 | 7029395 | 959448  | echinoderm microtubule associated protein like 2 | Eml2      | 192360 | 1,04 | up   |
| 6005560 | 7029395 | 959436  | echinoderm microtubule associated protein like 2 | Eml2      | 192360 | 1,32 | up   |
| 6077608 | 7029395 | 959439  | echinoderm microtubule associated protein like 2 | Eml2      | 192360 | 1,00 | down |
| 6140149 | 7029395 | 959451  | echinoderm microtubule associated protein like 2 | Eml2      | 192360 | 1,00 | up   |
| 6165947 | 7029395 | 959443  | echinoderm microtubule associated protein like 2 | Eml2      | 192360 | 1,09 | up   |
| 6170214 | 7029395 | 959434  | echinoderm microtubule associated protein like 2 | Eml2      | 192360 | 1,98 | up   |
| 6247288 | 7029395 | 959441  | echinoderm microtubule associated protein like 2 | Eml2      | 192360 | 1,72 | up   |
| 6259831 | 7029395 | 959433  | echinoderm microtubule associated protein like 2 | Eml2      | 192360 | 1,24 | down |
| 6269692 | 7029395 | 959445  | echinoderm microtubule associated protein like 2 | Eml2      | 192360 | 2,19 | down |
| 6337534 | 7029395 | 959446  | echinoderm microtubule associated protein like 2 | Eml2      | 192360 | 1,09 | down |
| 6403773 | 7029395 | 959432  | echinoderm microtubule associated protein like 2 | Eml2      | 192360 | 1,85 | up   |
| 6496144 | 7029395 | 959442  | echinoderm microtubule associated protein like 2 | Eml2      | 192360 | 1,10 | up   |
| 6558603 | 7029395 | 959435  | echinoderm microtubule associated protein like 2 | Eml2      | 192360 | 1,04 | down |
| 6601656 | 7029395 | 959440  | echinoderm microtubule associated protein like 2 | Eml2      | 192360 | 1,07 | up   |
| 6700745 | 7029395 | 959438  | echinoderm microtubule associated protein like 2 | Eml2      | 192360 | 1,47 | up   |
| 5780501 | 7133612 | 1210223 | ecto-NOX disulfide-thiol exchanger 1             | Enox1     | 306038 | 1,05 | up   |
| 6352429 | 7133612 | 1210300 | ecto-NOX disulfide-thiol exchanger 1             | Enox1     | 306038 | 1,09 | down |

|         |         |         |                                                    |        |        |      |      |
|---------|---------|---------|----------------------------------------------------|--------|--------|------|------|
| 6617177 | 7133612 | 1210223 | ecto-NOX disulfide-thiol exchanger 1               | Enox1  | 306038 | 1,34 | down |
| 5730072 | 7225246 | 1435176 | ectonucleoside triphosphate diphosphohydrolase 2   | Entpd2 | 64467  | 1,98 | up   |
| 5753858 | 7225246 | 1435178 | ectonucleoside triphosphate diphosphohydrolase 2   | Entpd2 | 64467  | 1,57 | up   |
| 5904861 | 7225246 | 1435179 | ectonucleoside triphosphate diphosphohydrolase 2   | Entpd2 | 64467  | 1,53 | up   |
| 5918830 | 7225246 | 1435174 | ectonucleoside triphosphate diphosphohydrolase 2   | Entpd2 | 64467  | 1,17 | up   |
| 6130761 | 7225246 | 1435175 | ectonucleoside triphosphate diphosphohydrolase 2   | Entpd2 | 64467  | 1,13 | up   |
| 6255654 | 7225246 | 1435182 | ectonucleoside triphosphate diphosphohydrolase 2   | Entpd2 | 64467  | 1,07 | up   |
| 6294648 | 7225246 | 1435177 | ectonucleoside triphosphate diphosphohydrolase 2   | Entpd2 | 64467  | 1,27 | up   |
| 6369644 | 7225246 | 1435181 | ectonucleoside triphosphate diphosphohydrolase 2   | Entpd2 | 64467  | 2,64 | down |
| 6431854 | 7225246 | 1435181 | ectonucleoside triphosphate diphosphohydrolase 2   | Entpd2 | 64467  | 1,09 | down |
| 6467070 | 7225246 | 1435183 | ectonucleoside triphosphate diphosphohydrolase 2   | Entpd2 | 64467  | 1,95 | down |
| 6537600 | 7225246 | 1435183 | ectonucleoside triphosphate diphosphohydrolase 2   | Entpd2 | 64467  | 1,48 | down |
| 6550914 | 7225246 | 1435183 | ectonucleoside triphosphate diphosphohydrolase 2   | Entpd2 | 64467  | 1,54 | down |
| 6553156 | 7225246 | 1435180 | ectonucleoside triphosphate diphosphohydrolase 2   | Entpd2 | 64467  | 1,28 | down |
| 5638090 | 7025785 | 950794  | ectonucleotide pyrophosphatase/phosphodiesterase 1 | Enpp1  | 85496  | 1,25 | down |
| 5666929 | 7025785 | 950792  | ectonucleotide pyrophosphatase/phosphodiesterase 1 | Enpp1  | 85496  | 1,15 | up   |
| 5668638 | 7025785 | 950773  | ectonucleotide pyrophosphatase/phosphodiesterase 1 | Enpp1  | 85496  | 1,23 | up   |
| 5818106 | 7025785 | 950776  | ectonucleotide pyrophosphatase/phosphodiesterase 1 | Enpp1  | 85496  | 1,08 | down |
| 5818568 | 7025785 | 950782  | ectonucleotide pyrophosphatase/phosphodiesterase 1 | Enpp1  | 85496  | 1,50 | down |
| 5882343 | 7025785 | 950770  | ectonucleotide pyrophosphatase/phosphodiesterase 1 | Enpp1  | 85496  | 1,13 | up   |
| 5912980 | 7025785 | 950775  | ectonucleotide pyrophosphatase/phosphodiesterase 1 | Enpp1  | 85496  | 1,20 | up   |
| 5920937 | 7025785 | 950795  | ectonucleotide pyrophosphatase/phosphodiesterase 1 | Enpp1  | 85496  | 1,25 | up   |
| 6020663 | 7025785 | 950791  | ectonucleotide pyrophosphatase/phosphodiesterase 1 | Enpp1  | 85496  | 1,05 | down |
| 6025563 | 7025785 | 950789  | ectonucleotide pyrophosphatase/phosphodiesterase 1 | Enpp1  | 85496  | 1,40 | up   |
| 6037222 | 7025785 | 950774  | ectonucleotide pyrophosphatase/phosphodiesterase 1 | Enpp1  | 85496  | 2,03 | down |
| 6105171 | 7025785 | 950771  | ectonucleotide pyrophosphatase/phosphodiesterase 1 | Enpp1  | 85496  | 1,29 | up   |
| 6133349 | 7025785 | 950778  | ectonucleotide pyrophosphatase/phosphodiesterase 1 | Enpp1  | 85496  | 1,10 | up   |
| 6136620 | 7025785 | 950783  | ectonucleotide pyrophosphatase/phosphodiesterase 1 | Enpp1  | 85496  | 1,19 | down |
| 6181335 | 7025785 | 950784  | ectonucleotide pyrophosphatase/phosphodiesterase 1 | Enpp1  | 85496  | 1,55 | down |
| 6226546 | 7025785 | 950793  | ectonucleotide pyrophosphatase/phosphodiesterase 1 | Enpp1  | 85496  | 1,14 | down |
| 6235025 | 7025785 | 950780  | ectonucleotide pyrophosphatase/phosphodiesterase 1 | Enpp1  | 85496  | 1,23 | up   |
| 6236268 | 7025785 | 950772  | ectonucleotide pyrophosphatase/phosphodiesterase 1 | Enpp1  | 85496  | 1,29 | up   |
| 6289972 | 7025785 | 950781  | ectonucleotide pyrophosphatase/phosphodiesterase 1 | Enpp1  | 85496  | 1,22 | down |
| 6420360 | 7025785 | 950779  | ectonucleotide pyrophosphatase/phosphodiesterase 1 | Enpp1  | 85496  | 1,17 | down |
| 6463575 | 7025785 | 950793  | ectonucleotide pyrophosphatase/phosphodiesterase 1 | Enpp1  | 85496  | 1,14 | up   |
| 6568635 | 7025785 | 950785  | ectonucleotide pyrophosphatase/phosphodiesterase 1 | Enpp1  | 85496  | 1,14 | down |
| 6568770 | 7025785 | 950788  | ectonucleotide pyrophosphatase/phosphodiesterase 1 | Enpp1  | 85496  | 1,28 | down |
| 6621577 | 7025785 | 950786  | ectonucleotide pyrophosphatase/phosphodiesterase 1 | Enpp1  | 85496  | 1,92 | up   |
| 6640663 | 7025785 | 950777  | ectonucleotide pyrophosphatase/phosphodiesterase 1 | Enpp1  | 85496  | 1,19 | down |
| 6699484 | 7025785 | 950787  | ectonucleotide pyrophosphatase/phosphodiesterase 1 | Enpp1  | 85496  | 1,33 | down |
| 6729729 | 7025785 | 950790  | ectonucleotide pyrophosphatase/phosphodiesterase 1 | Enpp1  | 85496  | 1,02 | down |
| 5640479 | 7025761 | 950720  | ectonucleotide pyrophosphatase/phosphodiesterase 3 | Enpp3  | 54410  | 1,13 | down |
| 5709380 | 7025761 | 950724  | ectonucleotide pyrophosphatase/phosphodiesterase 3 | Enpp3  | 54410  | 1,02 | up   |
| 5712021 | 7025761 | 950731  | ectonucleotide pyrophosphatase/phosphodiesterase 3 | Enpp3  | 54410  | 1,60 | down |
| 5765751 | 7025761 | 950732  | ectonucleotide pyrophosphatase/phosphodiesterase 3 | Enpp3  | 54410  | 2,01 | down |
| 5780310 | 7025761 | 950742  | ectonucleotide pyrophosphatase/phosphodiesterase 3 | Enpp3  | 54410  | 1,22 | down |
| 5835902 | 7025761 | 950740  | ectonucleotide pyrophosphatase/phosphodiesterase 3 | Enpp3  | 54410  | 1,12 | up   |
| 5849629 | 7025761 | 950733  | ectonucleotide pyrophosphatase/phosphodiesterase 3 | Enpp3  | 54410  | 1,20 | down |
| 5854463 | 7025761 | 950728  | ectonucleotide pyrophosphatase/phosphodiesterase 3 | Enpp3  | 54410  | 1,04 | up   |
| 5886439 | 7025761 | 950722  | ectonucleotide pyrophosphatase/phosphodiesterase 3 | Enpp3  | 54410  | 1,04 | up   |
| 5981178 | 7025761 | 950743  | ectonucleotide pyrophosphatase/phosphodiesterase 3 | Enpp3  | 54410  | 1,51 | down |
| 5988964 | 7025761 | 950730  | ectonucleotide pyrophosphatase/phosphodiesterase 3 | Enpp3  | 54410  | 1,20 | up   |
| 6107827 | 7025761 | 950719  | ectonucleotide pyrophosphatase/phosphodiesterase 3 | Enpp3  | 54410  | 1,02 | up   |
| 6113013 | 7025761 | 950739  | ectonucleotide pyrophosphatase/phosphodiesterase 3 | Enpp3  | 54410  | 1,16 | down |
| 6164067 | 7025761 | 950729  | ectonucleotide pyrophosphatase/phosphodiesterase 3 | Enpp3  | 54410  | 1,32 | up   |
| 6171843 | 7025761 | 950719  | ectonucleotide pyrophosphatase/phosphodiesterase 3 | Enpp3  | 54410  | 1,02 | up   |



|         |         |         |                                                    |        |        |      |      |
|---------|---------|---------|----------------------------------------------------|--------|--------|------|------|
| 6192760 | 7025761 | 950738  | ectonucleotide pyrophosphatase/phosphodiesterase 3 | Enpp3  | 54410  | 1,14 | down |
| 6252944 | 7025761 | 950739  | ectonucleotide pyrophosphatase/phosphodiesterase 3 | Enpp3  | 54410  | 1,75 | up   |
| 6330845 | 7025761 | 950721  | ectonucleotide pyrophosphatase/phosphodiesterase 3 | Enpp3  | 54410  | 1,16 | up   |
| 6429448 | 7025761 | 950723  | ectonucleotide pyrophosphatase/phosphodiesterase 3 | Enpp3  | 54410  | 1,08 | up   |
| 6460610 | 7025761 | 950735  | ectonucleotide pyrophosphatase/phosphodiesterase 3 | Enpp3  | 54410  | 1,07 | up   |
| 6468964 | 7025761 | 950741  | ectonucleotide pyrophosphatase/phosphodiesterase 3 | Enpp3  | 54410  | 1,19 | down |
| 6492260 | 7025761 | 950737  | ectonucleotide pyrophosphatase/phosphodiesterase 3 | Enpp3  | 54410  | 1,06 | up   |
| 6514447 | 7025761 | 950725  | ectonucleotide pyrophosphatase/phosphodiesterase 3 | Enpp3  | 54410  | 1,12 | down |
| 6532247 | 7025761 | 950736  | ectonucleotide pyrophosphatase/phosphodiesterase 3 | Enpp3  | 54410  | 1,16 | down |
| 6539052 | 7025761 | 950727  | ectonucleotide pyrophosphatase/phosphodiesterase 3 | Enpp3  | 54410  | 1,74 | down |
| 6583582 | 7025761 | 950734  | ectonucleotide pyrophosphatase/phosphodiesterase 3 | Enpp3  | 54410  | 1,02 | up   |
| 6649974 | 7025761 | 950726  | ectonucleotide pyrophosphatase/phosphodiesterase 3 | Enpp3  | 54410  | 1,41 | down |
| 5623224 | 7352252 | 1750574 | ectonucleotide pyrophosphatase/phosphodiesterase 4 | Enpp4  | 301261 | 1,82 | down |
| 5672453 | 7352252 | 1750566 | ectonucleotide pyrophosphatase/phosphodiesterase 4 | Enpp4  | 301261 | 1,62 | down |
| 5906565 | 7352252 | 1750570 | ectonucleotide pyrophosphatase/phosphodiesterase 4 | Enpp4  | 301261 | 1,06 | down |
| 6058664 | 7352252 | 1750574 | ectonucleotide pyrophosphatase/phosphodiesterase 4 | Enpp4  | 301261 | 1,01 | down |
| 6176555 | 7352252 | 1750574 | ectonucleotide pyrophosphatase/phosphodiesterase 4 | Enpp4  | 301261 | 1,34 | up   |
| 6176645 | 7352252 | 1750574 | ectonucleotide pyrophosphatase/phosphodiesterase 4 | Enpp4  | 301261 | 1,23 | up   |
| 6309153 | 7352252 | 1750571 | ectonucleotide pyrophosphatase/phosphodiesterase 4 | Enpp4  | 301261 | 1,25 | up   |
| 6327940 | 7352252 | 1750574 | ectonucleotide pyrophosphatase/phosphodiesterase 4 | Enpp4  | 301261 | 2,16 | down |
| 6366708 | 7352252 | 1750574 | ectonucleotide pyrophosphatase/phosphodiesterase 4 | Enpp4  | 301261 | 1,05 | down |
| 6394484 | 7352252 | 1750574 | ectonucleotide pyrophosphatase/phosphodiesterase 4 | Enpp4  | 301261 | 1,28 | down |
| 6426006 | 7352252 | 1750570 | ectonucleotide pyrophosphatase/phosphodiesterase 4 | Enpp4  | 301261 | 1,50 | up   |
| 6597486 | 7352252 | 1750574 | ectonucleotide pyrophosphatase/phosphodiesterase 4 | Enpp4  | 301261 | 1,19 | up   |
| 6671532 | 7352252 | 1750566 | ectonucleotide pyrophosphatase/phosphodiesterase 4 | Enpp4  | 301261 | 1,90 | down |
| 6699317 | 7352252 | 1750574 | ectonucleotide pyrophosphatase/phosphodiesterase 4 | Enpp4  | 301261 | 1,11 | up   |
| 5834410 | 7330238 | 1695969 | EF-hand calcium binding domain 6                   | Efcab6 | 315179 | 1,27 | down |
| 5626644 | 7352635 | 1751452 | EF-hand domain (C-terminal) containing 1           | Efhc1  | 301295 | 1,07 | down |
| 5637156 | 7352635 | 1751454 | EF-hand domain (C-terminal) containing 1           | Efhc1  | 301295 | 1,05 | up   |
| 6023256 | 7352635 | 1751448 | EF-hand domain (C-terminal) containing 1           | Efhc1  | 301295 | 1,05 | down |
| 6042152 | 7352635 | 1751450 | EF-hand domain (C-terminal) containing 1           | Efhc1  | 301295 | 2,65 | down |
| 6424716 | 7352635 | 1751451 | EF-hand domain (C-terminal) containing 1           | Efhc1  | 301295 | 1,49 | up   |
| 6469422 | 7352635 | 1751442 | EF-hand domain (C-terminal) containing 1           | Efhc1  | 301295 | 1,43 | up   |
| 6500761 | 7352635 | 1751440 | EF-hand domain (C-terminal) containing 1           | Efhc1  | 301295 | 2,15 | down |
| 6570240 | 7352635 | 1751449 | EF-hand domain (C-terminal) containing 1           | Efhc1  | 301295 | 1,14 | down |
| 6573111 | 7352635 | 1751446 | EF-hand domain (C-terminal) containing 1           | Efhc1  | 301295 | 1,11 | down |
| 6633459 | 7352635 | 1751441 | EF-hand domain (C-terminal) containing 1           | Efhc1  | 301295 | 1,83 | down |
| 6698894 | 7352635 | 1751453 | EF-hand domain (C-terminal) containing 1           | Efhc1  | 301295 | 1,13 | down |
| 5633081 | 7225393 | 1435580 | EGF-like-domain, multiple 7                        | Egfl7  | 245963 | 2,09 | down |
| 6003193 | 7225393 | 1435577 | EGF-like-domain, multiple 7                        | Egfl7  | 245963 | 1,63 | up   |
| 6067658 | 7225393 | 1435581 | EGF-like-domain, multiple 7                        | Egfl7  | 245963 | 1,68 | down |
| 6179743 | 7225393 | 1435576 | EGF-like-domain, multiple 7                        | Egfl7  | 245963 | 1,47 | down |
| 6295493 | 7225393 | 1435581 | EGF-like-domain, multiple 7                        | Egfl7  | 245963 | 1,10 | down |
| 6357982 | 7225393 | 1435575 | EGF-like-domain, multiple 7                        | Egfl7  | 245963 | 1,59 | down |
| 6595440 | 7225393 | 1435582 | EGF-like-domain, multiple 7                        | Egfl7  | 245963 | 1,84 | up   |
| 6621708 | 7225393 | 1435584 | EGF-like-domain, multiple 7                        | Egfl7  | 245963 | 1,25 | up   |
| 6664333 | 7225393 | 1435578 | EGF-like-domain, multiple 7                        | Egfl7  | 245963 | 1,11 | up   |
| 6680233 | 7225393 | 1435585 | EGF-like-domain, multiple 7                        | Egfl7  | 245963 | 1,15 | up   |
| 6692695 | 7225393 | 1435579 | EGF-like-domain, multiple 7                        | Egfl7  | 245963 | 1,02 | down |
| 6705395 | 7225393 | 1435583 | EGF-like-domain, multiple 7                        | Egfl7  | 245963 | 1,22 | up   |
| 5625620 | 7097541 | 1121177 | elastin                                            | Eln    | 25043  | 1,15 | up   |
| 5654488 | 7097541 | 1121169 | elastin                                            | Eln    | 25043  | 1,38 | down |
| 5670943 | 7097541 | 1121173 | elastin                                            | Eln    | 25043  | 1,12 | down |
| 5682566 | 7097541 | 1121183 | elastin                                            | Eln    | 25043  | 1,60 | down |
| 5725631 | 7097541 | 1121165 | elastin                                            | Eln    | 25043  | 1,28 | up   |
| 5736254 | 7097541 | 1121159 | elastin                                            | Eln    | 25043  | 1,44 | up   |

|         |         |         |                                        |      |        |      |      |
|---------|---------|---------|----------------------------------------|------|--------|------|------|
| 5742680 | 7097541 | 1121155 | elastin                                | Eln  | 25043  | 1,09 | down |
| 5813767 | 7097541 | 1121157 | elastin                                | Eln  | 25043  | 1,47 | down |
| 5825557 | 7097541 | 1121183 | elastin                                | Eln  | 25043  | 1,31 | up   |
| 5841126 | 7097541 | 1121174 | elastin                                | Eln  | 25043  | 1,69 | down |
| 5846801 | 7097541 | 1121180 | elastin                                | Eln  | 25043  | 1,15 | up   |
| 5848544 | 7097541 | 1121147 | elastin                                | Eln  | 25043  | 1,07 | down |
| 5974856 | 7097541 | 1121177 | elastin                                | Eln  | 25043  | 1,23 | up   |
| 5988401 | 7097541 | 1121161 | elastin                                | Eln  | 25043  | 1,21 | down |
| 5991874 | 7097541 | 1121178 | elastin                                | Eln  | 25043  | 1,06 | up   |
| 6019730 | 7097541 | 1121175 | elastin                                | Eln  | 25043  | 1,23 | down |
| 6069009 | 7097541 | 1121150 | elastin                                | Eln  | 25043  | 2,77 | up   |
| 6090308 | 7097541 | 1121152 | elastin                                | Eln  | 25043  | 1,01 | down |
| 6094083 | 7097541 | 1121156 | elastin                                | Eln  | 25043  | 1,11 | up   |
| 6157140 | 7097541 | 1121149 | elastin                                | Eln  | 25043  | 1,15 | up   |
| 6248057 | 7097541 | 1121168 | elastin                                | Eln  | 25043  | 1,10 | down |
| 6270848 | 7097541 | 1121166 | elastin                                | Eln  | 25043  | 1,06 | up   |
| 6294324 | 7097541 | 1121164 | elastin                                | Eln  | 25043  | 1,01 | down |
| 6308319 | 7097541 | 1121182 | elastin                                | Eln  | 25043  | 1,29 | down |
| 6309779 | 7097541 | 1121165 | elastin                                | Eln  | 25043  | 1,35 | down |
| 6360678 | 7097541 | 1121169 | elastin                                | Eln  | 25043  | 1,11 | up   |
| 6408496 | 7097541 | 1121151 | elastin                                | Eln  | 25043  | 1,58 | down |
| 6415846 | 7097541 | 1121162 | elastin                                | Eln  | 25043  | 1,19 | down |
| 6429272 | 7097541 | 1121181 | elastin                                | Eln  | 25043  | 1,24 | down |
| 6440305 | 7097541 | 1121171 | elastin                                | Eln  | 25043  | 1,13 | down |
| 6444490 | 7097541 | 1121153 | elastin                                | Eln  | 25043  | 1,05 | up   |
| 6469133 | 7097541 | 1121176 | elastin                                | Eln  | 25043  | 1,18 | up   |
| 6469800 | 7097541 | 1121160 | elastin                                | Eln  | 25043  | 1,05 | up   |
| 6522291 | 7097541 | 1121163 | elastin                                | Eln  | 25043  | 1,31 | up   |
| 6541975 | 7097541 | 1121183 | elastin                                | Eln  | 25043  | 1,05 | down |
| 6561389 | 7097541 | 1121172 | elastin                                | Eln  | 25043  | 1,23 | up   |
| 6569835 | 7097541 | 1121148 | elastin                                | Eln  | 25043  | 1,25 | up   |
| 6609456 | 7097541 | 1121167 | elastin                                | Eln  | 25043  | 2,37 | down |
| 6611611 | 7097541 | 1121165 | elastin                                | Eln  | 25043  | 1,42 | down |
| 6620145 | 7097541 | 1121169 | elastin                                | Eln  | 25043  | 1,08 | down |
| 6637330 | 7097541 | 1121170 | elastin                                | Eln  | 25043  | 1,59 | up   |
| 6660647 | 7097541 | 1121179 | elastin                                | Eln  | 25043  | 1,01 | up   |
| 6672522 | 7097541 | 1121154 | elastin                                | Eln  | 25043  | 1,18 | down |
| 6691076 | 7097541 | 1121158 | elastin                                | Eln  | 25043  | 1,10 | up   |
| 6721099 | 7097541 | 1121154 | elastin                                | Eln  | 25043  | 1,06 | up   |
| 5650966 | 7104955 | 1140124 | ELK4, member of ETS oncogene family    | Elk4 | 304786 | 1,03 | down |
| 5747927 | 7104955 | 1140123 | ELK4, member of ETS oncogene family    | Elk4 | 304786 | 1,03 | down |
| 5851844 | 7104955 | 1140118 | ELK4, member of ETS oncogene family    | Elk4 | 304786 | 1,49 | down |
| 5942752 | 7104955 | 1140122 | ELK4, member of ETS oncogene family    | Elk4 | 304786 | 1,36 | up   |
| 5943481 | 7104955 | 1140117 | ELK4, member of ETS oncogene family    | Elk4 | 304786 | 1,11 | up   |
| 6074942 | 7104955 | 1140122 | ELK4, member of ETS oncogene family    | Elk4 | 304786 | 1,02 | down |
| 6173882 | 7104955 | 1140125 | ELK4, member of ETS oncogene family    | Elk4 | 304786 | 1,71 | up   |
| 6273648 | 7104955 | 1140122 | ELK4, member of ETS oncogene family    | Elk4 | 304786 | 1,21 | up   |
| 6600485 | 7104955 | 1140120 | ELK4, member of ETS oncogene family    | Elk4 | 304786 | 1,07 | up   |
| 6702083 | 7104955 | 1140124 | ELK4, member of ETS oncogene family    | Elk4 | 304786 | 1,02 | up   |
| 6717085 | 7104955 | 1140121 | ELK4, member of ETS oncogene family    | Elk4 | 304786 | 1,36 | up   |
| 6734564 | 7104955 | 1140118 | ELK4, member of ETS oncogene family    | Elk4 | 304786 | 1,07 | up   |
| 5660312 | 7119930 | 1177210 | Ellis van Creveld gene homolog (human) | Evc  | 289712 | 1,13 | up   |
| 5755961 | 7119930 | 1177207 | Ellis van Creveld gene homolog (human) | Evc  | 289712 | 2,14 | up   |
| 6075847 | 7119930 | 1177209 | Ellis van Creveld gene homolog (human) | Evc  | 289712 | 1,10 | up   |
| 6351037 | 7119930 | 1177207 | Ellis van Creveld gene homolog (human) | Evc  | 289712 | 1,01 | down |
| 6457108 | 7119930 | 1177208 | Ellis van Creveld gene homolog (human) | Evc  | 289712 | 1,06 | up   |

|         |         |         |                                                      |        |        |      |      |
|---------|---------|---------|------------------------------------------------------|--------|--------|------|------|
| 5629598 | 7033616 | 970230  | elongation factor Tu GTP binding domain containing 1 | Eftud1 | 308789 | 1,08 | down |
| 5647343 | 7033616 | 970201  | elongation factor Tu GTP binding domain containing 1 | Eftud1 | 308789 | 1,26 | up   |
| 5728946 | 7033616 | 970193  | elongation factor Tu GTP binding domain containing 1 | Eftud1 | 308789 | 1,16 | down |
| 5750861 | 7033616 | 970202  | elongation factor Tu GTP binding domain containing 1 | Eftud1 | 308789 | 1,20 | up   |
| 5757893 | 7033616 | 970196  | elongation factor Tu GTP binding domain containing 1 | Eftud1 | 308789 | 1,49 | up   |
| 5764579 | 7033616 | 970203  | elongation factor Tu GTP binding domain containing 1 | Eftud1 | 308789 | 1,11 | up   |
| 5836007 | 7033616 | 970200  | elongation factor Tu GTP binding domain containing 1 | Eftud1 | 308789 | 1,06 | up   |
| 5870405 | 7033616 | 970188  | elongation factor Tu GTP binding domain containing 1 | Eftud1 | 308789 | 1,12 | down |
| 5871390 | 7033616 | 970234  | elongation factor Tu GTP binding domain containing 1 | Eftud1 | 308789 | 1,23 | down |
| 5952300 | 7033616 | 970220  | elongation factor Tu GTP binding domain containing 1 | Eftud1 | 308789 | 1,01 | up   |
| 6024496 | 7033616 | 970205  | elongation factor Tu GTP binding domain containing 1 | Eftud1 | 308789 | 1,25 | up   |
| 6169303 | 7033616 | 970234  | elongation factor Tu GTP binding domain containing 1 | Eftud1 | 308789 | 1,33 | down |
| 6197372 | 7033616 | 970236  | elongation factor Tu GTP binding domain containing 1 | Eftud1 | 308789 | 1,43 | down |
| 6203628 | 7033616 | 970207  | elongation factor Tu GTP binding domain containing 1 | Eftud1 | 308789 | 1,07 | up   |
| 6239718 | 7033616 | 970198  | elongation factor Tu GTP binding domain containing 1 | Eftud1 | 308789 | 1,04 | down |
| 6261676 | 7033616 | 970199  | elongation factor Tu GTP binding domain containing 1 | Eftud1 | 308789 | 1,36 | down |
| 6269572 | 7033616 | 970189  | elongation factor Tu GTP binding domain containing 1 | Eftud1 | 308789 | 1,44 | up   |
| 6288107 | 7033616 | 970206  | elongation factor Tu GTP binding domain containing 1 | Eftud1 | 308789 | 1,11 | up   |
| 6341868 | 7033616 | 970197  | elongation factor Tu GTP binding domain containing 1 | Eftud1 | 308789 | 1,42 | up   |
| 6352386 | 7033616 | 970190  | elongation factor Tu GTP binding domain containing 1 | Eftud1 | 308789 | 1,35 | up   |
| 6359424 | 7033616 | 970228  | elongation factor Tu GTP binding domain containing 1 | Eftud1 | 308789 | 1,16 | up   |
| 6495670 | 7033616 | 970193  | elongation factor Tu GTP binding domain containing 1 | Eftud1 | 308789 | 1,37 | up   |
| 6512564 | 7033616 | 970206  | elongation factor Tu GTP binding domain containing 1 | Eftud1 | 308789 | 1,36 | up   |
| 6553245 | 7033616 | 970229  | elongation factor Tu GTP binding domain containing 1 | Eftud1 | 308789 | 1,67 | down |
| 6597051 | 7033616 | 970228  | elongation factor Tu GTP binding domain containing 1 | Eftud1 | 308789 | 1,00 | up   |
| 6636022 | 7033616 | 970236  | elongation factor Tu GTP binding domain containing 1 | Eftud1 | 308789 | 1,45 | down |
| 6720294 | 7033616 | 970198  | elongation factor Tu GTP binding domain containing 1 | Eftud1 | 308789 | 1,07 | up   |
| 6737518 | 7033616 | 970205  | elongation factor Tu GTP binding domain containing 1 | Eftud1 | 308789 | 1,53 | up   |
| 5698537 | 7054147 | 1018974 | embryonic ectoderm development                       | Eed    | 293104 | 1,41 | down |
| 5717992 | 7054147 | 1018982 | embryonic ectoderm development                       | Eed    | 293104 | 1,42 | up   |
| 5740040 | 7054147 | 1018985 | embryonic ectoderm development                       | Eed    | 293104 | 1,16 | up   |
| 5819153 | 7054147 | 1018979 | embryonic ectoderm development                       | Eed    | 293104 | 1,15 | up   |
| 5972287 | 7054147 | 1018974 | embryonic ectoderm development                       | Eed    | 293104 | 1,26 | up   |
| 5981558 | 7054147 | 1018976 | embryonic ectoderm development                       | Eed    | 293104 | 1,03 | up   |
| 6017129 | 7054147 | 1018978 | embryonic ectoderm development                       | Eed    | 293104 | 1,01 | up   |
| 6054901 | 7054147 | 1018983 | embryonic ectoderm development                       | Eed    | 293104 | 1,03 | up   |
| 6154135 | 7054147 | 1018986 | embryonic ectoderm development                       | Eed    | 293104 | 1,31 | down |
| 6326738 | 7054147 | 1018975 | embryonic ectoderm development                       | Eed    | 293104 | 1,18 | up   |
| 6358164 | 7054147 | 1018986 | embryonic ectoderm development                       | Eed    | 293104 | 1,32 | up   |
| 6369848 | 7054147 | 1018986 | embryonic ectoderm development                       | Eed    | 293104 | 1,04 | down |
| 6373513 | 7054147 | 1018984 | embryonic ectoderm development                       | Eed    | 293104 | 1,13 | down |
| 6539645 | 7054147 | 1018980 | embryonic ectoderm development                       | Eed    | 293104 | 1,58 | down |
| 6606230 | 7054147 | 1018981 | embryonic ectoderm development                       | Eed    | 293104 | 1,20 | up   |
| 6661877 | 7054147 | 1018976 | embryonic ectoderm development                       | Eed    | 293104 | 1,22 | up   |
| 5952601 | 7270592 | 1548564 | endoplasmic reticulum protein 27                     | Erp27  | 297698 | 1,21 | up   |
| 6117993 | 7270592 | 1548561 | endoplasmic reticulum protein 27                     | Erp27  | 297698 | 2,09 | up   |
| 6189696 | 7270592 | 1548556 | endoplasmic reticulum protein 27                     | Erp27  | 297698 | 2,07 | down |
| 6229315 | 7270592 | 1548562 | endoplasmic reticulum protein 27                     | Erp27  | 297698 | 1,03 | up   |
| 6234597 | 7270592 | 1548559 | endoplasmic reticulum protein 27                     | Erp27  | 297698 | 1,45 | down |
| 6431454 | 7270592 | 1548563 | endoplasmic reticulum protein 27                     | Erp27  | 297698 | 1,46 | down |
| 6629215 | 7270592 | 1548557 | endoplasmic reticulum protein 27                     | Erp27  | 297698 | 1,12 | down |
| 5706959 | 7056915 | 1024763 | endoplasmic reticulum to nucleus signaling 2         | Ern2   | 365363 | 1,11 | up   |
| 5713362 | 7056915 | 1024766 | endoplasmic reticulum to nucleus signaling 2         | Ern2   | 365363 | 1,12 | down |
| 5729340 | 7056915 | 1024750 | endoplasmic reticulum to nucleus signaling 2         | Ern2   | 365363 | 1,30 | down |
| 5745000 | 7056915 | 1024766 | endoplasmic reticulum to nucleus signaling 2         | Ern2   | 365363 | 1,06 | up   |
| 5806896 | 7056915 | 1024753 | endoplasmic reticulum to nucleus signaling 2         | Ern2   | 365363 | 1,14 | up   |

|         |         |         |                                              |       |        |      |      |
|---------|---------|---------|----------------------------------------------|-------|--------|------|------|
| 5863435 | 7056915 | 1024756 | endoplasmic reticulum to nucleus signaling 2 | Ern2  | 365363 | 1,03 | down |
| 5883410 | 7056915 | 1024767 | endoplasmic reticulum to nucleus signaling 2 | Ern2  | 365363 | 1,37 | up   |
| 5978420 | 7056915 | 1024763 | endoplasmic reticulum to nucleus signaling 2 | Ern2  | 365363 | 1,24 | down |
| 6055653 | 7056915 | 1024763 | endoplasmic reticulum to nucleus signaling 2 | Ern2  | 365363 | 1,07 | down |
| 6066091 | 7056915 | 1024751 | endoplasmic reticulum to nucleus signaling 2 | Ern2  | 365363 | 1,11 | down |
| 6101004 | 7056915 | 1024762 | endoplasmic reticulum to nucleus signaling 2 | Ern2  | 365363 | 1,09 | up   |
| 6172155 | 7056915 | 1024764 | endoplasmic reticulum to nucleus signaling 2 | Ern2  | 365363 | 1,09 | up   |
| 6349063 | 7056915 | 1024758 | endoplasmic reticulum to nucleus signaling 2 | Ern2  | 365363 | 1,25 | down |
| 6397970 | 7056915 | 1024755 | endoplasmic reticulum to nucleus signaling 2 | Ern2  | 365363 | 1,16 | up   |
| 6401208 | 7056915 | 1024760 | endoplasmic reticulum to nucleus signaling 2 | Ern2  | 365363 | 1,02 | up   |
| 6465071 | 7056915 | 1024752 | endoplasmic reticulum to nucleus signaling 2 | Ern2  | 365363 | 1,16 | down |
| 6479326 | 7056915 | 1024749 | endoplasmic reticulum to nucleus signaling 2 | Ern2  | 365363 | 2,49 | down |
| 6480360 | 7056915 | 1024769 | endoplasmic reticulum to nucleus signaling 2 | Ern2  | 365363 | 1,08 | up   |
| 6598373 | 7056915 | 1024771 | endoplasmic reticulum to nucleus signaling 2 | Ern2  | 365363 | 1,18 | up   |
| 6606677 | 7056915 | 1024754 | endoplasmic reticulum to nucleus signaling 2 | Ern2  | 365363 | 1,01 | up   |
| 6650876 | 7056915 | 1024765 | endoplasmic reticulum to nucleus signaling 2 | Ern2  | 365363 | 1,23 | down |
| 6692823 | 7056915 | 1024750 | endoplasmic reticulum to nucleus signaling 2 | Ern2  | 365363 | 1,02 | up   |
| 5749111 | 7180333 | 1325738 | endothelin receptor type A                   | Ednra | 24326  | 1,16 | up   |
| 5789036 | 7180333 | 1325741 | endothelin receptor type A                   | Ednra | 24326  | 1,18 | down |
| 5883423 | 7180333 | 1325740 | endothelin receptor type A                   | Ednra | 24326  | 1,19 | up   |
| 5902284 | 7180333 | 1325734 | endothelin receptor type A                   | Ednra | 24326  | 1,67 | down |
| 6057565 | 7180333 | 1325740 | endothelin receptor type A                   | Ednra | 24326  | 1,30 | down |
| 6297039 | 7180333 | 1325739 | endothelin receptor type A                   | Ednra | 24326  | 1,03 | down |
| 6302788 | 7180333 | 1325737 | endothelin receptor type A                   | Ednra | 24326  | 2,23 | up   |
| 6741458 | 7180333 | 1325736 | endothelin receptor type A                   | Ednra | 24326  | 1,39 | up   |
| 6744616 | 7180333 | 1325735 | endothelin receptor type A                   | Ednra | 24326  | 1,37 | down |
| 5689195 | 7095047 | 1115228 | endothelin-converting enzyme 2               | Ece2  | 408243 | 1,86 | down |
| 5690192 | 7095047 | 1115243 | endothelin-converting enzyme 2               | Ece2  | 408243 | 1,33 | up   |
| 5707352 | 7095047 | 1115241 | endothelin-converting enzyme 2               | Ece2  | 408243 | 3,07 | up   |
| 5707723 | 7095047 | 1115240 | endothelin-converting enzyme 2               | Ece2  | 408243 | 1,04 | up   |
| 5793657 | 7095047 | 1115233 | endothelin-converting enzyme 2               | Ece2  | 408243 | 1,15 | down |
| 5805953 | 7095047 | 1115231 | endothelin-converting enzyme 2               | Ece2  | 408243 | 1,16 | up   |
| 5858023 | 7095047 | 1115239 | endothelin-converting enzyme 2               | Ece2  | 408243 | 1,18 | up   |
| 5956374 | 7095047 | 1115236 | endothelin-converting enzyme 2               | Ece2  | 408243 | 1,41 | down |
| 6087668 | 7095047 | 1115238 | endothelin-converting enzyme 2               | Ece2  | 408243 | 1,61 | up   |
| 6203598 | 7095047 | 1115237 | endothelin-converting enzyme 2               | Ece2  | 408243 | 1,42 | up   |
| 6208597 | 7095047 | 1115230 | endothelin-converting enzyme 2               | Ece2  | 408243 | 1,00 | up   |
| 6259792 | 7095047 | 1115242 | endothelin-converting enzyme 2               | Ece2  | 408243 | 1,50 | down |
| 6277273 | 7095047 | 1115227 | endothelin-converting enzyme 2               | Ece2  | 408243 | 1,04 | up   |
| 6298457 | 7095047 | 1115225 | endothelin-converting enzyme 2               | Ece2  | 408243 | 1,02 | down |
| 6397922 | 7095047 | 1115232 | endothelin-converting enzyme 2               | Ece2  | 408243 | 1,22 | down |
| 6462017 | 7095047 | 1115226 | endothelin-converting enzyme 2               | Ece2  | 408243 | 1,08 | down |
| 6494527 | 7095047 | 1115235 | endothelin-converting enzyme 2               | Ece2  | 408243 | 1,69 | down |
| 6658806 | 7095047 | 1115234 | endothelin-converting enzyme 2               | Ece2  | 408243 | 1,55 | up   |
| 6680858 | 7095047 | 1115229 | endothelin-converting enzyme 2               | Ece2  | 408243 | 1,26 | down |
| 5749628 | 7369822 | 1795123 | engrailed homeobox 1                         | En1   | 685360 | 1,07 | down |
| 5938622 | 7369822 | 1795123 | engrailed homeobox 1                         | En1   | 685360 | 1,06 | down |
| 6121936 | 7369822 | 1795128 | engrailed homeobox 1                         | En1   | 685360 | 3,87 | down |
| 6148627 | 7369822 | 1795123 | engrailed homeobox 1                         | En1   | 685360 | 1,18 | down |
| 6206907 | 7369822 | 1795128 | engrailed homeobox 1                         | En1   | 685360 | 1,03 | down |
| 6346748 | 7369822 | 1795124 | engrailed homeobox 1                         | En1   | 685360 | 1,27 | up   |
| 6355913 | 7369822 | 1795123 | engrailed homeobox 1                         | En1   | 685360 | 1,16 | down |
| 6507411 | 7369822 | 1795128 | engrailed homeobox 1                         | En1   | 685360 | 1,31 | up   |
| 6548760 | 7369822 | 1795129 | engrailed homeobox 1                         | En1   | 685360 | 1,03 | down |
| 6561206 | 7369822 | 1795128 | engrailed homeobox 1                         | En1   | 685360 | 1,04 | up   |
| 5748553 | 7087282 | 1096144 | Eph receptor A6                              | Epha6 | 29202  | 1,06 | down |

|         |         |         |                 |       |        |      |      |
|---------|---------|---------|-----------------|-------|--------|------|------|
| 5831410 | 7087282 | 1096243 | Eph receptor A6 | Epha6 | 29202  | 2,03 | down |
| 6340902 | 7087282 | 1096244 | Eph receptor A6 | Epha6 | 29202  | 1,11 | up   |
| 6545564 | 7087282 | 1096243 | Eph receptor A6 | Epha6 | 29202  | 1,21 | down |
| 6586934 | 7087282 | 1096242 | Eph receptor A6 | Epha6 | 29202  | 1,02 | up   |
| 5692960 | 7292154 | 1601641 | Eph receptor B2 | Ephb2 | 313633 | 1,04 | down |
| 5714979 | 7292154 | 1601672 | Eph receptor B2 | Ephb2 | 313633 | 1,42 | down |
| 5718914 | 7292154 | 1601656 | Eph receptor B2 | Ephb2 | 313633 | 1,00 | down |
| 5806587 | 7292154 | 1601632 | Eph receptor B2 | Ephb2 | 313633 | 1,37 | down |
| 6007729 | 7292154 | 1601636 | Eph receptor B2 | Ephb2 | 313633 | 1,14 | down |
| 6049643 | 7292154 | 1601638 | Eph receptor B2 | Ephb2 | 313633 | 1,51 | down |
| 6061734 | 7292154 | 1601640 | Eph receptor B2 | Ephb2 | 313633 | 1,47 | up   |
| 6067785 | 7292154 | 1601651 | Eph receptor B2 | Ephb2 | 313633 | 1,19 | down |
| 6084290 | 7292154 | 1601635 | Eph receptor B2 | Ephb2 | 313633 | 1,74 | down |
| 6329300 | 7292154 | 1601646 | Eph receptor B2 | Ephb2 | 313633 | 1,04 | down |
| 6353544 | 7292154 | 1601642 | Eph receptor B2 | Ephb2 | 313633 | 1,41 | down |
| 6363151 | 7292154 | 1601655 | Eph receptor B2 | Ephb2 | 313633 | 1,20 | up   |
| 6535506 | 7292154 | 1601645 | Eph receptor B2 | Ephb2 | 313633 | 1,34 | down |
| 6621935 | 7292154 | 1601673 | Eph receptor B2 | Ephb2 | 313633 | 1,31 | up   |
| 6701630 | 7292154 | 1601634 | Eph receptor B2 | Ephb2 | 313633 | 1,06 | down |
| 5631250 | 7095008 | 1115055 | Eph receptor B3 | Ephb3 | 287989 | 1,11 | down |
| 5636798 | 7095008 | 1115059 | Eph receptor B3 | Ephb3 | 287989 | 1,57 | down |
| 5652934 | 7095008 | 1115061 | Eph receptor B3 | Ephb3 | 287989 | 1,02 | up   |
| 5711512 | 7095008 | 1115060 | Eph receptor B3 | Ephb3 | 287989 | 1,04 | up   |
| 5712146 | 7095008 | 1115050 | Eph receptor B3 | Ephb3 | 287989 | 2,03 | down |
| 5729890 | 7095008 | 1115049 | Eph receptor B3 | Ephb3 | 287989 | 1,02 | down |
| 5921558 | 7095008 | 1115053 | Eph receptor B3 | Ephb3 | 287989 | 1,43 | up   |
| 5968237 | 7095008 | 1115049 | Eph receptor B3 | Ephb3 | 287989 | 1,21 | up   |
| 5973683 | 7095008 | 1115053 | Eph receptor B3 | Ephb3 | 287989 | 1,23 | down |
| 6025840 | 7095008 | 1115051 | Eph receptor B3 | Ephb3 | 287989 | 1,04 | up   |
| 6043584 | 7095008 | 1115056 | Eph receptor B3 | Ephb3 | 287989 | 1,13 | up   |
| 6060666 | 7095008 | 1115058 | Eph receptor B3 | Ephb3 | 287989 | 1,38 | up   |
| 6143274 | 7095008 | 1115052 | Eph receptor B3 | Ephb3 | 287989 | 1,09 | down |
| 6144510 | 7095008 | 1115051 | Eph receptor B3 | Ephb3 | 287989 | 1,01 | down |
| 6233349 | 7095008 | 1115051 | Eph receptor B3 | Ephb3 | 287989 | 1,24 | up   |
| 6311906 | 7095008 | 1115054 | Eph receptor B3 | Ephb3 | 287989 | 1,57 | up   |
| 6312325 | 7095008 | 1115057 | Eph receptor B3 | Ephb3 | 287989 | 1,33 | up   |
| 6410749 | 7095008 | 1115064 | Eph receptor B3 | Ephb3 | 287989 | 1,00 | up   |
| 5640692 | 7253088 | 1505115 | Eph receptor B6 | Ephb6 | 312275 | 1,13 | up   |
| 5648019 | 7253088 | 1505117 | Eph receptor B6 | Ephb6 | 312275 | 1,20 | up   |
| 5856206 | 7253088 | 1505124 | Eph receptor B6 | Ephb6 | 312275 | 1,66 | down |
| 5882339 | 7253088 | 1505131 | Eph receptor B6 | Ephb6 | 312275 | 1,10 | down |
| 5884750 | 7253088 | 1505123 | Eph receptor B6 | Ephb6 | 312275 | 1,53 | up   |
| 5900021 | 7253088 | 1505118 | Eph receptor B6 | Ephb6 | 312275 | 1,30 | up   |
| 5918823 | 7253088 | 1505130 | Eph receptor B6 | Ephb6 | 312275 | 1,31 | down |
| 5981859 | 7253088 | 1505127 | Eph receptor B6 | Ephb6 | 312275 | 1,31 | up   |
| 5984662 | 7253088 | 1505122 | Eph receptor B6 | Ephb6 | 312275 | 1,77 | up   |
| 6003716 | 7253088 | 1505116 | Eph receptor B6 | Ephb6 | 312275 | 1,25 | down |
| 6021725 | 7253088 | 1505113 | Eph receptor B6 | Ephb6 | 312275 | 1,18 | up   |
| 6112802 | 7253088 | 1505125 | Eph receptor B6 | Ephb6 | 312275 | 1,32 | down |
| 6201910 | 7253088 | 1505126 | Eph receptor B6 | Ephb6 | 312275 | 1,03 | down |
| 6244574 | 7253088 | 1505128 | Eph receptor B6 | Ephb6 | 312275 | 1,34 | down |
| 6254681 | 7253088 | 1505109 | Eph receptor B6 | Ephb6 | 312275 | 1,38 | up   |
| 6298335 | 7253088 | 1505109 | Eph receptor B6 | Ephb6 | 312275 | 1,19 | up   |
| 6300968 | 7253088 | 1505109 | Eph receptor B6 | Ephb6 | 312275 | 1,64 | up   |
| 6363539 | 7253088 | 1505129 | Eph receptor B6 | Ephb6 | 312275 | 2,39 | down |
| 6421022 | 7253088 | 1505119 | Eph receptor B6 | Ephb6 | 312275 | 1,02 | up   |

|         |         |         |                         |       |        |      |      |
|---------|---------|---------|-------------------------|-------|--------|------|------|
| 6449916 | 7253088 | 1505120 | Eph receptor B6         | Ephb6 | 312275 | 1,61 | down |
| 6483917 | 7253088 | 1505132 | Eph receptor B6         | Ephb6 | 312275 | 1,11 | up   |
| 6539672 | 7253088 | 1505114 | Eph receptor B6         | Ephb6 | 312275 | 1,07 | up   |
| 6681194 | 7253088 | 1505121 | Eph receptor B6         | Ephb6 | 312275 | 1,00 | up   |
| 5640354 | 7117526 | 1171026 | EphA5                   | Epha5 | 79208  | 1,14 | up   |
| 5729407 | 7117526 | 1170987 | EphA5                   | Epha5 | 79208  | 1,10 | up   |
| 5830489 | 7117526 | 1171015 | EphA5                   | Epha5 | 79208  | 1,25 | up   |
| 5986200 | 7117526 | 1171031 | EphA5                   | Epha5 | 79208  | 1,38 | up   |
| 6063084 | 7117526 | 1171009 | EphA5                   | Epha5 | 79208  | 1,49 | down |
| 6101730 | 7117526 | 1170976 | EphA5                   | Epha5 | 79208  | 1,29 | down |
| 6110503 | 7117526 | 1170976 | EphA5                   | Epha5 | 79208  | 1,14 | down |
| 6154671 | 7117526 | 1171010 | EphA5                   | Epha5 | 79208  | 1,02 | down |
| 6283260 | 7117526 | 1170983 | EphA5                   | Epha5 | 79208  | 1,20 | down |
| 6294312 | 7117526 | 1171008 | EphA5                   | Epha5 | 79208  | 1,05 | down |
| 6382082 | 7117526 | 1171020 | EphA5                   | Epha5 | 79208  | 1,16 | down |
| 6433664 | 7117526 | 1171028 | EphA5                   | Epha5 | 79208  | 1,02 | down |
| 6466415 | 7117526 | 1171025 | EphA5                   | Epha5 | 79208  | 1,44 | up   |
| 6607737 | 7117526 | 1171027 | EphA5                   | Epha5 | 79208  | 1,58 | down |
| 6658919 | 7117526 | 1171002 | EphA5                   | Epha5 | 79208  | 1,01 | up   |
| 6680825 | 7117526 | 1171021 | EphA5                   | Epha5 | 79208  | 2,25 | down |
| 6684318 | 7117526 | 1170976 | EphA5                   | Epha5 | 79208  | 1,26 | up   |
| 6686297 | 7117526 | 1171030 | EphA5                   | Epha5 | 79208  | 1,29 | down |
| 6715130 | 7117526 | 1171019 | EphA5                   | Epha5 | 79208  | 1,09 | down |
| 5647028 | 7375891 | 1811232 | ephrin B1               | Efnb1 | 25186  | 1,06 | up   |
| 5777661 | 7375891 | 1811232 | ephrin B1               | Efnb1 | 25186  | 1,16 | down |
| 5837081 | 7375891 | 1811233 | ephrin B1               | Efnb1 | 25186  | 1,10 | up   |
| 5974432 | 7375891 | 1811234 | ephrin B1               | Efnb1 | 25186  | 1,14 | up   |
| 6048623 | 7375891 | 1811238 | ephrin B1               | Efnb1 | 25186  | 1,39 | up   |
| 6073963 | 7375891 | 1811232 | ephrin B1               | Efnb1 | 25186  | 4,29 | down |
| 6129301 | 7375891 | 1811237 | ephrin B1               | Efnb1 | 25186  | 1,07 | down |
| 6311047 | 7375891 | 1811235 | ephrin B1               | Efnb1 | 25186  | 2,04 | up   |
| 6508937 | 7375891 | 1811236 | ephrin B1               | Efnb1 | 25186  | 1,16 | up   |
| 6583363 | 7375891 | 1811232 | ephrin B1               | Efnb1 | 25186  | 1,03 | up   |
| 6663330 | 7375891 | 1811238 | ephrin B1               | Efnb1 | 25186  | 1,33 | down |
| 6726190 | 7375891 | 1811232 | ephrin B1               | Efnb1 | 25186  | 1,27 | up   |
| 6734732 | 7375891 | 1811232 | ephrin B1               | Efnb1 | 25186  | 1,17 | up   |
| 5628279 | 7214067 | 1408218 | epidermal growth factor | Egf   | 25313  | 1,59 | up   |
| 5631521 | 7214067 | 1408217 | epidermal growth factor | Egf   | 25313  | 1,15 | up   |
| 5687511 | 7214067 | 1408217 | epidermal growth factor | Egf   | 25313  | 1,06 | up   |
| 5692820 | 7214067 | 1408236 | epidermal growth factor | Egf   | 25313  | 1,11 | down |
| 5700452 | 7214067 | 1408235 | epidermal growth factor | Egf   | 25313  | 1,20 | down |
| 5702773 | 7214067 | 1408239 | epidermal growth factor | Egf   | 25313  | 1,62 | down |
| 5705775 | 7214067 | 1408234 | epidermal growth factor | Egf   | 25313  | 1,17 | up   |
| 5715278 | 7214067 | 1408231 | epidermal growth factor | Egf   | 25313  | 1,29 | up   |
| 5793643 | 7214067 | 1408221 | epidermal growth factor | Egf   | 25313  | 1,02 | up   |
| 5915947 | 7214067 | 1408226 | epidermal growth factor | Egf   | 25313  | 1,25 | up   |
| 6043815 | 7214067 | 1408219 | epidermal growth factor | Egf   | 25313  | 1,18 | down |
| 6074664 | 7214067 | 1408235 | epidermal growth factor | Egf   | 25313  | 1,13 | up   |
| 6115928 | 7214067 | 1408225 | epidermal growth factor | Egf   | 25313  | 1,17 | up   |
| 6120339 | 7214067 | 1408227 | epidermal growth factor | Egf   | 25313  | 1,25 | down |
| 6154770 | 7214067 | 1408230 | epidermal growth factor | Egf   | 25313  | 1,68 | up   |
| 6159677 | 7214067 | 1408229 | epidermal growth factor | Egf   | 25313  | 1,17 | up   |
| 6215397 | 7214067 | 1408220 | epidermal growth factor | Egf   | 25313  | 2,16 | up   |
| 6234021 | 7214067 | 1408222 | epidermal growth factor | Egf   | 25313  | 1,15 | down |
| 6247081 | 7214067 | 1408228 | epidermal growth factor | Egf   | 25313  | 1,35 | down |
| 6279391 | 7214067 | 1408223 | epidermal growth factor | Egf   | 25313  | 1,07 | down |

|         |         |         |                                                   |        |        |      |      |
|---------|---------|---------|---------------------------------------------------|--------|--------|------|------|
| 6492440 | 7214067 | 1408238 | epidermal growth factor                           | Egf    | 25313  | 1,04 | up   |
| 6615568 | 7214067 | 1408237 | epidermal growth factor                           | Egf    | 25313  | 1,02 | down |
| 6623228 | 7214067 | 1408232 | epidermal growth factor                           | Egf    | 25313  | 1,05 | up   |
| 6627671 | 7214067 | 1408217 | epidermal growth factor                           | Egf    | 25313  | 1,01 | up   |
| 6666763 | 7214067 | 1408224 | epidermal growth factor                           | Egf    | 25313  | 1,08 | up   |
| 6695642 | 7214067 | 1408219 | epidermal growth factor                           | Egf    | 25313  | 1,12 | up   |
| 6711264 | 7214067 | 1408238 | epidermal growth factor                           | Egf    | 25313  | 1,91 | down |
| 6746247 | 7214067 | 1408233 | epidermal growth factor                           | Egf    | 25313  | 1,42 | down |
| 5656336 | 7207069 | 1392007 | epithelial cell transforming sequence 2 oncogene  | Ect2   | 361921 | 1,03 | up   |
| 5832385 | 7207069 | 1392013 | epithelial cell transforming sequence 2 oncogene  | Ect2   | 361921 | 1,04 | up   |
| 5899870 | 7207069 | 1392012 | epithelial cell transforming sequence 2 oncogene  | Ect2   | 361921 | 1,22 | up   |
| 6188562 | 7207069 | 1392011 | epithelial cell transforming sequence 2 oncogene  | Ect2   | 361921 | 1,06 | up   |
| 6261629 | 7207069 | 1392014 | epithelial cell transforming sequence 2 oncogene  | Ect2   | 361921 | 1,04 | up   |
| 6416535 | 7207069 | 1392015 | epithelial cell transforming sequence 2 oncogene  | Ect2   | 361921 | 1,01 | up   |
| 6564650 | 7207069 | 1392007 | epithelial cell transforming sequence 2 oncogene  | Ect2   | 361921 | 1,03 | down |
| 6712147 | 7207069 | 1392016 | epithelial cell transforming sequence 2 oncogene  | Ect2   | 361921 | 1,12 | down |
| 5647091 | 7259141 | 1520444 | epithelial membrane protein 1                     | Emp1   | 25314  | 1,15 | up   |
| 6004146 | 7259141 | 1520445 | epithelial membrane protein 1                     | Emp1   | 25314  | 2,04 | down |
| 6069754 | 7259141 | 1520441 | epithelial membrane protein 1                     | Emp1   | 25314  | 1,06 | up   |
| 6141175 | 7259141 | 1520441 | epithelial membrane protein 1                     | Emp1   | 25314  | 1,15 | down |
| 6728436 | 7259141 | 1520443 | epithelial membrane protein 1                     | Emp1   | 25314  | 1,05 | down |
| 6736608 | 7259141 | 1520442 | epithelial membrane protein 1                     | Emp1   | 25314  | 1,01 | down |
| 6274261 | 7064843 | 1043180 | epithelial membrane protein 2                     | Emp2   | 360468 | 2,46 | down |
| 6424952 | 7064843 | 1043184 | epithelial membrane protein 2                     | Emp2   | 360468 | 1,10 | up   |
| 6428871 | 7064843 | 1043183 | epithelial membrane protein 2                     | Emp2   | 360468 | 2,84 | down |
| 6461589 | 7064843 | 1043181 | epithelial membrane protein 2                     | Emp2   | 360468 | 1,09 | down |
| 6462383 | 7064843 | 1043182 | epithelial membrane protein 2                     | Emp2   | 360468 | 1,10 | up   |
| 6617117 | 7064843 | 1043181 | epithelial membrane protein 2                     | Emp2   | 360468 | 1,58 | up   |
| 6681498 | 7064843 | 1043185 | epithelial membrane protein 2                     | Emp2   | 360468 | 3,13 | up   |
| 5640297 | 7078282 | 1075836 | epsin 2                                           | Epn2   | 60443  | 1,21 | down |
| 5721256 | 7078282 | 1075835 | epsin 2                                           | Epn2   | 60443  | 2,45 | down |
| 5723325 | 7078282 | 1075835 | epsin 2                                           | Epn2   | 60443  | 1,29 | down |
| 6022724 | 7078282 | 1075837 | epsin 2                                           | Epn2   | 60443  | 1,13 | down |
| 6034777 | 7078282 | 1075835 | epsin 2                                           | Epn2   | 60443  | 1,15 | down |
| 6096935 | 7078282 | 1075840 | epsin 2                                           | Epn2   | 60443  | 1,12 | down |
| 6192793 | 7078282 | 1075839 | epsin 2                                           | Epn2   | 60443  | 1,20 | up   |
| 6397908 | 7078282 | 1075841 | epsin 2                                           | Epn2   | 60443  | 1,20 | up   |
| 6426968 | 7078282 | 1075839 | epsin 2                                           | Epn2   | 60443  | 1,24 | up   |
| 6546153 | 7078282 | 1075838 | epsin 2                                           | Epn2   | 60443  | 1,01 | down |
| 6653804 | 7078282 | 1075842 | epsin 2                                           | Epn2   | 60443  | 1,06 | up   |
| 5720422 | 7246993 | 1490083 | ER degradation enhancer, mannosidase alpha-like 2 | Edem2  | 296304 | 1,27 | down |
| 5935510 | 7246993 | 1490082 | ER degradation enhancer, mannosidase alpha-like 2 | Edem2  | 296304 | 1,03 | up   |
| 5941066 | 7246993 | 1490084 | ER degradation enhancer, mannosidase alpha-like 2 | Edem2  | 296304 | 1,26 | down |
| 6057374 | 7246993 | 1490085 | ER degradation enhancer, mannosidase alpha-like 2 | Edem2  | 296304 | 1,09 | up   |
| 6126860 | 7246993 | 1490088 | ER degradation enhancer, mannosidase alpha-like 2 | Edem2  | 296304 | 1,11 | down |
| 6278896 | 7246993 | 1490079 | ER degradation enhancer, mannosidase alpha-like 2 | Edem2  | 296304 | 1,13 | down |
| 6308798 | 7246993 | 1490086 | ER degradation enhancer, mannosidase alpha-like 2 | Edem2  | 296304 | 1,10 | down |
| 6429678 | 7246993 | 1490087 | ER degradation enhancer, mannosidase alpha-like 2 | Edem2  | 296304 | 1,09 | down |
| 6454863 | 7246993 | 1490089 | ER degradation enhancer, mannosidase alpha-like 2 | Edem2  | 296304 | 1,60 | up   |
| 6539507 | 7246993 | 1490079 | ER degradation enhancer, mannosidase alpha-like 2 | Edem2  | 296304 | 1,40 | up   |
| 6558244 | 7246993 | 1490089 | ER degradation enhancer, mannosidase alpha-like 2 | Edem2  | 296304 | 2,32 | down |
| 6651587 | 7246993 | 1490081 | ER degradation enhancer, mannosidase alpha-like 2 | Edem2  | 296304 | 1,19 | down |
| 6664061 | 7246993 | 1490080 | ER degradation enhancer, mannosidase alpha-like 2 | Edem2  | 296304 | 1,11 | up   |
| 6709013 | 7246993 | 1490078 | ER degradation enhancer, mannosidase alpha-like 2 | Edem2  | 296304 | 2,34 | up   |
| 5850585 | 7234407 | 1459363 | ERGIC and golgi 3                                 | Ergic3 | 296306 | 1,09 | up   |
| 5960214 | 7234407 | 1459361 | ERGIC and golgi 3                                 | Ergic3 | 296306 | 1,02 | down |

|         |         |         |                                      |           |        |      |      |
|---------|---------|---------|--------------------------------------|-----------|--------|------|------|
| 6253685 | 7234407 | 1459368 | ERGIC and golgi 3                    | Ergic3    | 296306 | 1,19 | down |
| 6259590 | 7234407 | 1459360 | ERGIC and golgi 3                    | Ergic3    | 296306 | 1,29 | up   |
| 6373434 | 7234407 | 1459369 | ERGIC and golgi 3                    | Ergic3    | 296306 | 1,31 | down |
| 6408937 | 7234407 | 1459372 | ERGIC and golgi 3                    | Ergic3    | 296306 | 1,42 | up   |
| 6499031 | 7234407 | 1459366 | ERGIC and golgi 3                    | Ergic3    | 296306 | 1,10 | down |
| 6512832 | 7234407 | 1459371 | ERGIC and golgi 3                    | Ergic3    | 296306 | 1,04 | up   |
| 6579918 | 7234407 | 1459370 | ERGIC and golgi 3                    | Ergic3    | 296306 | 1,10 | up   |
| 6602160 | 7234407 | 1459359 | ERGIC and golgi 3                    | Ergic3    | 296306 | 1,65 | up   |
| 6670296 | 7234407 | 1459358 | ERGIC and golgi 3                    | Ergic3    | 296306 | 1,08 | up   |
| 6675123 | 7234407 | 1459372 | ERGIC and golgi 3                    | Ergic3    | 296306 | 1,22 | up   |
| 6677030 | 7234407 | 1459362 | ERGIC and golgi 3                    | Ergic3    | 296306 | 1,16 | up   |
| 6724831 | 7234407 | 1459372 | ERGIC and golgi 3                    | Ergic3    | 296306 | 1,16 | down |
| 5632995 | 7358708 | 1766598 | erythrocyte protein band 4.1-like 3  | Epb4.113  | 116724 | 1,01 | down |
| 5658532 | 7358708 | 1766597 | erythrocyte protein band 4.1-like 3  | Epb4.113  | 116724 | 1,04 | down |
| 5669804 | 7358708 | 1766578 | erythrocyte protein band 4.1-like 3  | Epb4.113  | 116724 | 1,42 | down |
| 5683081 | 7358708 | 1766599 | erythrocyte protein band 4.1-like 3  | Epb4.113  | 116724 | 1,22 | up   |
| 5708905 | 7358708 | 1766589 | erythrocyte protein band 4.1-like 3  | Epb4.113  | 116724 | 1,11 | up   |
| 5765900 | 7358708 | 1766583 | erythrocyte protein band 4.1-like 3  | Epb4.113  | 116724 | 1,03 | up   |
| 5800990 | 7358708 | 1766601 | erythrocyte protein band 4.1-like 3  | Epb4.113  | 116724 | 1,14 | down |
| 5902308 | 7358708 | 1766589 | erythrocyte protein band 4.1-like 3  | Epb4.113  | 116724 | 2,01 | down |
| 5996337 | 7358708 | 1766600 | erythrocyte protein band 4.1-like 3  | Epb4.113  | 116724 | 1,04 | down |
| 5997605 | 7358708 | 1766590 | erythrocyte protein band 4.1-like 3  | Epb4.113  | 116724 | 1,09 | up   |
| 6012012 | 7358708 | 1766586 | erythrocyte protein band 4.1-like 3  | Epb4.113  | 116724 | 1,08 | up   |
| 6023114 | 7358708 | 1766589 | erythrocyte protein band 4.1-like 3  | Epb4.113  | 116724 | 1,58 | down |
| 6060636 | 7358708 | 1766583 | erythrocyte protein band 4.1-like 3  | Epb4.113  | 116724 | 1,00 | down |
| 6074748 | 7358708 | 1766592 | erythrocyte protein band 4.1-like 3  | Epb4.113  | 116724 | 1,54 | up   |
| 6152352 | 7358708 | 1766587 | erythrocyte protein band 4.1-like 3  | Epb4.113  | 116724 | 1,17 | up   |
| 6285607 | 7358708 | 1766589 | erythrocyte protein band 4.1-like 3  | Epb4.113  | 116724 | 1,05 | down |
| 6307393 | 7358708 | 1766595 | erythrocyte protein band 4.1-like 3  | Epb4.113  | 116724 | 1,29 | down |
| 6343362 | 7358708 | 1766601 | erythrocyte protein band 4.1-like 3  | Epb4.113  | 116724 | 1,07 | down |
| 6401092 | 7358708 | 1766588 | erythrocyte protein band 4.1-like 3  | Epb4.113  | 116724 | 1,17 | up   |
| 6425756 | 7358708 | 1766584 | erythrocyte protein band 4.1-like 3  | Epb4.113  | 116724 | 1,18 | down |
| 6471136 | 7358708 | 1766579 | erythrocyte protein band 4.1-like 3  | Epb4.113  | 116724 | 1,09 | down |
| 6479016 | 7358708 | 1766581 | erythrocyte protein band 4.1-like 3  | Epb4.113  | 116724 | 1,11 | down |
| 6484663 | 7358708 | 1766591 | erythrocyte protein band 4.1-like 3  | Epb4.113  | 116724 | 2,94 | down |
| 6505080 | 7358708 | 1766596 | erythrocyte protein band 4.1-like 3  | Epb4.113  | 116724 | 1,02 | up   |
| 6557031 | 7358708 | 1766580 | erythrocyte protein band 4.1-like 3  | Epb4.113  | 116724 | 1,19 | up   |
| 6578377 | 7358708 | 1766585 | erythrocyte protein band 4.1-like 3  | Epb4.113  | 116724 | 1,06 | down |
| 6643729 | 7358708 | 1766582 | erythrocyte protein band 4.1-like 3  | Epb4.113  | 116724 | 1,29 | up   |
| 6652816 | 7358708 | 1766588 | erythrocyte protein band 4.1-like 3  | Epb4.113  | 116724 | 1,07 | up   |
| 5648968 | 7174281 | 1310869 | erythrocyte protein band 4.1-like 4a | Epb4.114a | 307514 | 1,17 | down |
| 5712566 | 7174281 | 1310855 | erythrocyte protein band 4.1-like 4a | Epb4.114a | 307514 | 1,24 | down |
| 5736456 | 7174281 | 1310859 | erythrocyte protein band 4.1-like 4a | Epb4.114a | 307514 | 1,10 | down |
| 5804730 | 7174281 | 1310873 | erythrocyte protein band 4.1-like 4a | Epb4.114a | 307514 | 1,22 | up   |
| 5876087 | 7174281 | 1310854 | erythrocyte protein band 4.1-like 4a | Epb4.114a | 307514 | 1,05 | down |
| 5898489 | 7174281 | 1310872 | erythrocyte protein band 4.1-like 4a | Epb4.114a | 307514 | 1,41 | down |
| 5903988 | 7174281 | 1310866 | erythrocyte protein band 4.1-like 4a | Epb4.114a | 307514 | 1,53 | down |
| 6066993 | 7174281 | 1310842 | erythrocyte protein band 4.1-like 4a | Epb4.114a | 307514 | 1,09 | up   |
| 6067285 | 7174281 | 1310858 | erythrocyte protein band 4.1-like 4a | Epb4.114a | 307514 | 1,11 | up   |
| 6198381 | 7174281 | 1310851 | erythrocyte protein band 4.1-like 4a | Epb4.114a | 307514 | 1,22 | down |
| 6246084 | 7174281 | 1310857 | erythrocyte protein band 4.1-like 4a | Epb4.114a | 307514 | 1,34 | down |
| 6247574 | 7174281 | 1310845 | erythrocyte protein band 4.1-like 4a | Epb4.114a | 307514 | 1,50 | up   |
| 6263738 | 7174281 | 1310850 | erythrocyte protein band 4.1-like 4a | Epb4.114a | 307514 | 1,12 | up   |
| 6387949 | 7174281 | 1310845 | erythrocyte protein band 4.1-like 4a | Epb4.114a | 307514 | 1,32 | up   |
| 6413737 | 7174281 | 1310871 | erythrocyte protein band 4.1-like 4a | Epb4.114a | 307514 | 1,25 | up   |
| 6462360 | 7174281 | 1310874 | erythrocyte protein band 4.1-like 4a | Epb4.114a | 307514 | 1,15 | down |



|         |         |         |                                                                      |           |        |      |      |
|---------|---------|---------|----------------------------------------------------------------------|-----------|--------|------|------|
| 6685775 | 7174281 | 1310843 | erythrocyte protein band 4.1-like 4a                                 | Epb4.114a | 307514 | 1,03 | up   |
| 6702095 | 7174281 | 1310870 | erythrocyte protein band 4.1-like 4a                                 | Epb4.114a | 307514 | 1,17 | up   |
| 6724243 | 7174281 | 1310847 | erythrocyte protein band 4.1-like 4a                                 | Epb4.114a | 307514 | 1,37 | down |
| 5780273 | 7343073 | 1727579 | erythropoietin receptor                                              | Epor      | 24336  | 1,12 | up   |
| 5802671 | 7343073 | 1727586 | erythropoietin receptor                                              | Epor      | 24336  | 1,77 | down |
| 5962264 | 7343073 | 1727582 | erythropoietin receptor                                              | Epor      | 24336  | 1,35 | up   |
| 6154590 | 7343073 | 1727582 | erythropoietin receptor                                              | Epor      | 24336  | 1,16 | down |
| 6165847 | 7343073 | 1727583 | erythropoietin receptor                                              | Epor      | 24336  | 1,13 | up   |
| 6264940 | 7343073 | 1727581 | erythropoietin receptor                                              | Epor      | 24336  | 1,10 | down |
| 6431465 | 7343073 | 1727586 | erythropoietin receptor                                              | Epor      | 24336  | 1,07 | up   |
| 6497987 | 7343073 | 1727581 | erythropoietin receptor                                              | Epor      | 24336  | 2,69 | up   |
| 6525783 | 7343073 | 1727582 | erythropoietin receptor                                              | Epor      | 24336  | 1,03 | up   |
| 6540407 | 7343073 | 1727584 | erythropoietin receptor                                              | Epor      | 24336  | 1,11 | down |
| 6540440 | 7343073 | 1727585 | erythropoietin receptor                                              | Epor      | 24336  | 1,48 | down |
| 6628612 | 7343073 | 1727580 | erythropoietin receptor                                              | Epor      | 24336  | 1,49 | down |
| 5642892 | 7245695 | 1487073 | ESF1, nucleolar pre-rRNA processing protein, homolog (S. cerevisiae) | Esf1      | 366203 | 1,01 | down |
| 5749425 | 7245695 | 1487082 | ESF1, nucleolar pre-rRNA processing protein, homolog (S. cerevisiae) | Esf1      | 366203 | 1,32 | down |
| 5778250 | 7245695 | 1487074 | ESF1, nucleolar pre-rRNA processing protein, homolog (S. cerevisiae) | Esf1      | 366203 | 1,26 | up   |
| 5869727 | 7245695 | 1487072 | ESF1, nucleolar pre-rRNA processing protein, homolog (S. cerevisiae) | Esf1      | 366203 | 1,79 | down |
| 6121922 | 7245695 | 1487078 | ESF1, nucleolar pre-rRNA processing protein, homolog (S. cerevisiae) | Esf1      | 366203 | 1,46 | up   |
| 6159057 | 7245695 | 1487077 | ESF1, nucleolar pre-rRNA processing protein, homolog (S. cerevisiae) | Esf1      | 366203 | 1,25 | up   |
| 6180613 | 7245695 | 1487075 | ESF1, nucleolar pre-rRNA processing protein, homolog (S. cerevisiae) | Esf1      | 366203 | 1,00 | up   |
| 6239280 | 7245695 | 1487076 | ESF1, nucleolar pre-rRNA processing protein, homolog (S. cerevisiae) | Esf1      | 366203 | 1,19 | down |
| 6284997 | 7245695 | 1487079 | ESF1, nucleolar pre-rRNA processing protein, homolog (S. cerevisiae) | Esf1      | 366203 | 1,16 | up   |
| 6318268 | 7245695 | 1487071 | ESF1, nucleolar pre-rRNA processing protein, homolog (S. cerevisiae) | Esf1      | 366203 | 1,03 | up   |
| 6337317 | 7245695 | 1487082 | ESF1, nucleolar pre-rRNA processing protein, homolog (S. cerevisiae) | Esf1      | 366203 | 1,52 | up   |
| 6361825 | 7245695 | 1487083 | ESF1, nucleolar pre-rRNA processing protein, homolog (S. cerevisiae) | Esf1      | 366203 | 1,30 | up   |
| 6381299 | 7245695 | 1487080 | ESF1, nucleolar pre-rRNA processing protein, homolog (S. cerevisiae) | Esf1      | 366203 | 1,47 | up   |
| 6410900 | 7245695 | 1487069 | ESF1, nucleolar pre-rRNA processing protein, homolog (S. cerevisiae) | Esf1      | 366203 | 2,10 | up   |
| 6541240 | 7245695 | 1487073 | ESF1, nucleolar pre-rRNA processing protein, homolog (S. cerevisiae) | Esf1      | 366203 | 1,40 | down |
| 6558302 | 7245695 | 1487083 | ESF1, nucleolar pre-rRNA processing protein, homolog (S. cerevisiae) | Esf1      | 366203 | 1,22 | down |
| 6598675 | 7245695 | 1487082 | ESF1, nucleolar pre-rRNA processing protein, homolog (S. cerevisiae) | Esf1      | 366203 | 1,36 | up   |
| 6677117 | 7245695 | 1487082 | ESF1, nucleolar pre-rRNA processing protein, homolog (S. cerevisiae) | Esf1      | 366203 | 1,06 | up   |
| 5634464 | 7316647 | 1664068 | estrogen receptor binding site associated, antigen, 9                | Ebag9     | 299864 | 1,04 | down |
| 5646376 | 7316647 | 1664071 | estrogen receptor binding site associated, antigen, 9                | Ebag9     | 299864 | 3,82 | down |
| 6134689 | 7316647 | 1664069 | estrogen receptor binding site associated, antigen, 9                | Ebag9     | 299864 | 1,10 | up   |
| 6178540 | 7316647 | 1664070 | estrogen receptor binding site associated, antigen, 9                | Ebag9     | 299864 | 1,08 | up   |
| 6278527 | 7316647 | 1664066 | estrogen receptor binding site associated, antigen, 9                | Ebag9     | 299864 | 1,38 | up   |
| 6385301 | 7316647 | 1664072 | estrogen receptor binding site associated, antigen, 9                | Ebag9     | 299864 | 1,28 | down |
| 6545900 | 7316647 | 1664065 | estrogen receptor binding site associated, antigen, 9                | Ebag9     | 299864 | 1,36 | up   |
| 6602757 | 7316647 | 1664065 | estrogen receptor binding site associated, antigen, 9                | Ebag9     | 299864 | 1,30 | up   |
| 6692396 | 7316647 | 1664067 | estrogen receptor binding site associated, antigen, 9                | Ebag9     | 299864 | 1,09 | up   |
| 5721745 | 7242451 | 1479340 | ets homologous factor                                                | Ehf       | 295965 | 1,06 | down |
| 5750526 | 7242451 | 1479339 | ets homologous factor                                                | Ehf       | 295965 | 1,13 | up   |
| 5778298 | 7242451 | 1479343 | ets homologous factor                                                | Ehf       | 295965 | 1,37 | down |
| 6358179 | 7242451 | 1479342 | ets homologous factor                                                | Ehf       | 295965 | 1,16 | down |
| 6443925 | 7242451 | 1479344 | ets homologous factor                                                | Ehf       | 295965 | 1,10 | down |
| 6605604 | 7242451 | 1479338 | ets homologous factor                                                | Ehf       | 295965 | 2,01 | up   |
| 6623576 | 7242451 | 1479351 | ets homologous factor                                                | Ehf       | 295965 | 1,72 | down |
| 6667315 | 7242451 | 1479346 | ets homologous factor                                                | Ehf       | 295965 | 1,24 | up   |
| 6725833 | 7242451 | 1479345 | ets homologous factor                                                | Ehf       | 295965 | 2,01 | down |
| 5685323 | 7297523 | 1615455 | ets variant 1                                                        | Etv1      | 362733 | 1,20 | down |
| 5781298 | 7297523 | 1615425 | ets variant 1                                                        | Etv1      | 362733 | 1,23 | up   |
| 5784338 | 7297523 | 1615424 | ets variant 1                                                        | Etv1      | 362733 | 1,15 | down |
| 5831304 | 7297523 | 1615454 | ets variant 1                                                        | Etv1      | 362733 | 1,15 | down |
| 6057217 | 7297523 | 1615451 | ets variant 1                                                        | Etv1      | 362733 | 2,15 | down |

|         |         |         |                                                            |        |        |      |      |
|---------|---------|---------|------------------------------------------------------------|--------|--------|------|------|
| 6113275 | 7297523 | 1615438 | ets variant 1                                              | Etv1   | 362733 | 1,18 | up   |
| 6139455 | 7297523 | 1615439 | ets variant 1                                              | Etv1   | 362733 | 1,12 | down |
| 6210641 | 7297523 | 1615453 | ets variant 1                                              | Etv1   | 362733 | 1,06 | down |
| 6259813 | 7297523 | 1615428 | ets variant 1                                              | Etv1   | 362733 | 1,42 | up   |
| 6276178 | 7297523 | 1615426 | ets variant 1                                              | Etv1   | 362733 | 1,28 | down |
| 6325893 | 7297523 | 1615432 | ets variant 1                                              | Etv1   | 362733 | 1,15 | down |
| 6595340 | 7297523 | 1615455 | ets variant 1                                              | Etv1   | 362733 | 1,01 | down |
| 6686071 | 7297523 | 1615442 | ets variant 1                                              | Etv1   | 362733 | 1,09 | down |
| 5677521 | 7089499 | 1102390 | ets variant 5                                              | Etv5   | 303828 | 1,05 | up   |
| 5755456 | 7089499 | 1102379 | ets variant 5                                              | Etv5   | 303828 | 1,63 | down |
| 5769950 | 7089499 | 1102402 | ets variant 5                                              | Etv5   | 303828 | 1,06 | down |
| 5861905 | 7089499 | 1102394 | ets variant 5                                              | Etv5   | 303828 | 1,13 | up   |
| 5866419 | 7089499 | 1102388 | ets variant 5                                              | Etv5   | 303828 | 1,06 | up   |
| 5935367 | 7089499 | 1102388 | ets variant 5                                              | Etv5   | 303828 | 1,39 | up   |
| 6054391 | 7089499 | 1102377 | ets variant 5                                              | Etv5   | 303828 | 1,16 | down |
| 6084759 | 7089499 | 1102394 | ets variant 5                                              | Etv5   | 303828 | 1,06 | down |
| 6127285 | 7089499 | 1102401 | ets variant 5                                              | Etv5   | 303828 | 2,00 | up   |
| 6273383 | 7089499 | 1102380 | ets variant 5                                              | Etv5   | 303828 | 1,11 | up   |
| 6285823 | 7089499 | 1102396 | ets variant 5                                              | Etv5   | 303828 | 1,08 | down |
| 6316869 | 7089499 | 1102400 | ets variant 5                                              | Etv5   | 303828 | 1,23 | up   |
| 6319989 | 7089499 | 1102395 | ets variant 5                                              | Etv5   | 303828 | 1,32 | up   |
| 6373113 | 7089499 | 1102390 | ets variant 5                                              | Etv5   | 303828 | 1,48 | up   |
| 6510951 | 7089499 | 1102397 | ets variant 5                                              | Etv5   | 303828 | 1,14 | up   |
| 6574116 | 7089499 | 1102378 | ets variant 5                                              | Etv5   | 303828 | 1,08 | down |
| 6591511 | 7089499 | 1102401 | ets variant 5                                              | Etv5   | 303828 | 1,66 | down |
| 6633139 | 7089499 | 1102375 | ets variant 5                                              | Etv5   | 303828 | 1,28 | down |
| 6733412 | 7089499 | 1102390 | ets variant 5                                              | Etv5   | 303828 | 1,38 | down |
| 5728616 | 7267052 | 1539409 | eukaryotic elongation factor, selenocysteine-tRNA-specific | Eefsec | 500255 | 1,11 | down |
| 5769111 | 7267052 | 1539431 | eukaryotic elongation factor, selenocysteine-tRNA-specific | Eefsec | 500255 | 1,83 | up   |
| 5979211 | 7267052 | 1539416 | eukaryotic elongation factor, selenocysteine-tRNA-specific | Eefsec | 500255 | 1,06 | down |
| 6228260 | 7267052 | 1539428 | eukaryotic elongation factor, selenocysteine-tRNA-specific | Eefsec | 500255 | 1,19 | up   |
| 6264420 | 7267052 | 1539400 | eukaryotic elongation factor, selenocysteine-tRNA-specific | Eefsec | 500255 | 1,05 | down |
| 6375906 | 7267052 | 1539441 | eukaryotic elongation factor, selenocysteine-tRNA-specific | Eefsec | 500255 | 1,11 | down |
| 6388014 | 7267052 | 1539399 | eukaryotic elongation factor, selenocysteine-tRNA-specific | Eefsec | 500255 | 1,09 | down |
| 6409849 | 7267052 | 1539427 | eukaryotic elongation factor, selenocysteine-tRNA-specific | Eefsec | 500255 | 1,09 | up   |
| 6556374 | 7267052 | 1539399 | eukaryotic elongation factor, selenocysteine-tRNA-specific | Eefsec | 500255 | 2,53 | down |
| 5670417 | 7036394 | 976761  | eukaryotic elongation factor-2 kinase                      | Eef2k  | 25435  | 1,65 | up   |
| 5744762 | 7036394 | 976757  | eukaryotic elongation factor-2 kinase                      | Eef2k  | 25435  | 1,14 | up   |
| 5787833 | 7036394 | 976755  | eukaryotic elongation factor-2 kinase                      | Eef2k  | 25435  | 1,93 | down |
| 5851984 | 7036394 | 976771  | eukaryotic elongation factor-2 kinase                      | Eef2k  | 25435  | 1,01 | down |
| 5872962 | 7036394 | 976762  | eukaryotic elongation factor-2 kinase                      | Eef2k  | 25435  | 1,84 | down |
| 5873474 | 7036394 | 976756  | eukaryotic elongation factor-2 kinase                      | Eef2k  | 25435  | 1,97 | down |
| 5945109 | 7036394 | 976755  | eukaryotic elongation factor-2 kinase                      | Eef2k  | 25435  | 1,17 | up   |
| 5960580 | 7036394 | 976762  | eukaryotic elongation factor-2 kinase                      | Eef2k  | 25435  | 1,13 | up   |
| 6186383 | 7036394 | 976765  | eukaryotic elongation factor-2 kinase                      | Eef2k  | 25435  | 1,10 | down |
| 6201395 | 7036394 | 976768  | eukaryotic elongation factor-2 kinase                      | Eef2k  | 25435  | 2,02 | down |
| 6252551 | 7036394 | 976770  | eukaryotic elongation factor-2 kinase                      | Eef2k  | 25435  | 1,22 | down |
| 6254140 | 7036394 | 976773  | eukaryotic elongation factor-2 kinase                      | Eef2k  | 25435  | 1,61 | down |
| 6312901 | 7036394 | 976772  | eukaryotic elongation factor-2 kinase                      | Eef2k  | 25435  | 1,18 | down |
| 6329010 | 7036394 | 976759  | eukaryotic elongation factor-2 kinase                      | Eef2k  | 25435  | 1,30 | down |
| 6359914 | 7036394 | 976768  | eukaryotic elongation factor-2 kinase                      | Eef2k  | 25435  | 1,26 | down |
| 6476629 | 7036394 | 976767  | eukaryotic elongation factor-2 kinase                      | Eef2k  | 25435  | 1,18 | up   |
| 6495757 | 7036394 | 976769  | eukaryotic elongation factor-2 kinase                      | Eef2k  | 25435  | 1,12 | up   |
| 6510560 | 7036394 | 976760  | eukaryotic elongation factor-2 kinase                      | Eef2k  | 25435  | 1,05 | up   |
| 6635577 | 7036394 | 976763  | eukaryotic elongation factor-2 kinase                      | Eef2k  | 25435  | 1,03 | down |
| 6683957 | 7036394 | 976764  | eukaryotic elongation factor-2 kinase                      | Eef2k  | 25435  | 1,45 | up   |

|         |         |         |                                                                                  |        |        |      |      |
|---------|---------|---------|----------------------------------------------------------------------------------|--------|--------|------|------|
| 6714939 | 7036394 | 976766  | eukaryotic elongation factor-2 kinase                                            | Eef2k  | 25435  | 1,05 | up   |
| 6733499 | 7036394 | 976758  | eukaryotic elongation factor-2 kinase                                            | Eef2k  | 25435  | 1,28 | up   |
| 6739628 | 7036394 | 976756  | eukaryotic elongation factor-2 kinase                                            | Eef2k  | 25435  | 1,14 | up   |
| 6471810 | 7114108 | 1162444 | eukaryotic translation elongation factor 1 gamma                                 | Eef1g  | 293725 | 1,11 | up   |
| 6665388 | 7114108 | 1162444 | eukaryotic translation elongation factor 1 gamma                                 | Eef1g  | 293725 | 1,11 | up   |
| 5667464 | 7291054 | 1599411 | eukaryotic translation initiation factor 2C, 3                                   | Eif2c3 | 313593 | 1,09 | down |
| 5771558 | 7291054 | 1599411 | eukaryotic translation initiation factor 2C, 3                                   | Eif2c3 | 313593 | 1,25 | up   |
| 6417575 | 7291054 | 1599389 | eukaryotic translation initiation factor 2C, 3                                   | Eif2c3 | 313593 | 1,00 | down |
| 5618271 | 7267802 | 1541887 | eukaryotic translation initiation factor 4E member 3                             | Eif4e3 | 297481 | 1,94 | up   |
| 5879494 | 7267802 | 1541906 | eukaryotic translation initiation factor 4E member 3                             | Eif4e3 | 297481 | 1,45 | up   |
| 6042601 | 7267802 | 1541896 | eukaryotic translation initiation factor 4E member 3                             | Eif4e3 | 297481 | 1,29 | up   |
| 6066444 | 7267802 | 1541895 | eukaryotic translation initiation factor 4E member 3                             | Eif4e3 | 297481 | 1,37 | up   |
| 6152850 | 7267802 | 1541903 | eukaryotic translation initiation factor 4E member 3                             | Eif4e3 | 297481 | 1,68 | up   |
| 6489608 | 7267802 | 1541890 | eukaryotic translation initiation factor 4E member 3                             | Eif4e3 | 297481 | 1,29 | up   |
| 6608597 | 7267802 | 1541894 | eukaryotic translation initiation factor 4E member 3                             | Eif4e3 | 297481 | 1,60 | up   |
| 5657579 | 7168914 | 1297020 | excision repair cross-complementing rodent repair deficiency, complementation gr | Ercc3  | 291703 | 1,22 | up   |
| 5700782 | 7168914 | 1297030 | excision repair cross-complementing rodent repair deficiency, complementation gr | Ercc3  | 291703 | 1,15 | down |
| 5835098 | 7168914 | 1297037 | excision repair cross-complementing rodent repair deficiency, complementation gr | Ercc3  | 291703 | 1,77 | down |
| 5958818 | 7168914 | 1297027 | excision repair cross-complementing rodent repair deficiency, complementation gr | Ercc3  | 291703 | 1,77 | down |
| 5990092 | 7168914 | 1297035 | excision repair cross-complementing rodent repair deficiency, complementation gr | Ercc3  | 291703 | 1,12 | down |
| 6043032 | 7168914 | 1297037 | excision repair cross-complementing rodent repair deficiency, complementation gr | Ercc3  | 291703 | 1,18 | up   |
| 6085909 | 7168914 | 1297020 | excision repair cross-complementing rodent repair deficiency, complementation gr | Ercc3  | 291703 | 1,24 | down |
| 6100699 | 7168914 | 1297024 | excision repair cross-complementing rodent repair deficiency, complementation gr | Ercc3  | 291703 | 1,16 | up   |
| 6247706 | 7168914 | 1297023 | excision repair cross-complementing rodent repair deficiency, complementation gr | Ercc3  | 291703 | 1,11 | down |
| 6278291 | 7168914 | 1297036 | excision repair cross-complementing rodent repair deficiency, complementation gr | Ercc3  | 291703 | 1,45 | up   |
| 6294392 | 7168914 | 1297021 | excision repair cross-complementing rodent repair deficiency, complementation gr | Ercc3  | 291703 | 1,06 | down |
| 6340112 | 7168914 | 1297034 | excision repair cross-complementing rodent repair deficiency, complementation gr | Ercc3  | 291703 | 1,12 | up   |
| 6396596 | 7168914 | 1297038 | excision repair cross-complementing rodent repair deficiency, complementation gr | Ercc3  | 291703 | 1,42 | down |
| 6418267 | 7168914 | 1297029 | excision repair cross-complementing rodent repair deficiency, complementation gr | Ercc3  | 291703 | 1,08 | up   |
| 6422258 | 7168914 | 1297033 | excision repair cross-complementing rodent repair deficiency, complementation gr | Ercc3  | 291703 | 1,15 | down |
| 6434616 | 7168914 | 1297026 | excision repair cross-complementing rodent repair deficiency, complementation gr | Ercc3  | 291703 | 1,07 | down |
| 6606316 | 7168914 | 1297031 | excision repair cross-complementing rodent repair deficiency, complementation gr | Ercc3  | 291703 | 1,06 | down |
| 5646482 | 7184850 | 1337606 | exocyst complex component 3-like                                                 | Exoc3l | 291961 | 1,71 | down |
| 5658581 | 7184850 | 1337600 | exocyst complex component 3-like                                                 | Exoc3l | 291961 | 1,33 | down |
| 5701410 | 7184850 | 1337611 | exocyst complex component 3-like                                                 | Exoc3l | 291961 | 1,18 | down |
| 5740883 | 7184850 | 1337612 | exocyst complex component 3-like                                                 | Exoc3l | 291961 | 1,04 | down |
| 5817769 | 7184850 | 1337601 | exocyst complex component 3-like                                                 | Exoc3l | 291961 | 1,07 | down |
| 5877861 | 7184850 | 1337604 | exocyst complex component 3-like                                                 | Exoc3l | 291961 | 1,03 | down |
| 5963732 | 7184850 | 1337601 | exocyst complex component 3-like                                                 | Exoc3l | 291961 | 2,04 | up   |
| 6095863 | 7184850 | 1337607 | exocyst complex component 3-like                                                 | Exoc3l | 291961 | 1,02 | up   |
| 6110485 | 7184850 | 1337600 | exocyst complex component 3-like                                                 | Exoc3l | 291961 | 1,31 | up   |
| 6238659 | 7184850 | 1337610 | exocyst complex component 3-like                                                 | Exoc3l | 291961 | 1,63 | down |
| 6239849 | 7184850 | 1337603 | exocyst complex component 3-like                                                 | Exoc3l | 291961 | 1,15 | down |
| 6293526 | 7184850 | 1337602 | exocyst complex component 3-like                                                 | Exoc3l | 291961 | 1,08 | up   |
| 6326116 | 7184850 | 1337612 | exocyst complex component 3-like                                                 | Exoc3l | 291961 | 1,68 | down |
| 6458779 | 7184850 | 1337608 | exocyst complex component 3-like                                                 | Exoc3l | 291961 | 1,03 | down |
| 6538614 | 7184850 | 1337610 | exocyst complex component 3-like                                                 | Exoc3l | 291961 | 1,20 | down |
| 6571731 | 7184850 | 1337601 | exocyst complex component 3-like                                                 | Exoc3l | 291961 | 1,30 | up   |
| 6594681 | 7184850 | 1337601 | exocyst complex component 3-like                                                 | Exoc3l | 291961 | 1,05 | up   |
| 6698126 | 7184850 | 1337605 | exocyst complex component 3-like                                                 | Exoc3l | 291961 | 1,26 | up   |
| 5652395 | 7108122 | 1147387 | exonuclease 1                                                                    | Exo1   | 305000 | 1,01 | up   |
| 5673349 | 7108122 | 1147400 | exonuclease 1                                                                    | Exo1   | 305000 | 1,30 | down |
| 5803188 | 7108122 | 1147401 | exonuclease 1                                                                    | Exo1   | 305000 | 1,32 | up   |
| 5831968 | 7108122 | 1147401 | exonuclease 1                                                                    | Exo1   | 305000 | 1,15 | down |
| 5901575 | 7108122 | 1147392 | exonuclease 1                                                                    | Exo1   | 305000 | 1,06 | down |
| 5909459 | 7108122 | 1147388 | exonuclease 1                                                                    | Exo1   | 305000 | 1,09 | up   |

|         |         |         |                             |       |        |      |      |
|---------|---------|---------|-----------------------------|-------|--------|------|------|
| 5955289 | 7108122 | 1147385 | exonuclease 1               | Exo1  | 305000 | 2,14 | down |
| 6044992 | 7108122 | 1147389 | exonuclease 1               | Exo1  | 305000 | 1,26 | down |
| 6100581 | 7108122 | 1147390 | exonuclease 1               | Exo1  | 305000 | 1,19 | down |
| 6123128 | 7108122 | 1147394 | exonuclease 1               | Exo1  | 305000 | 1,02 | up   |
| 6124709 | 7108122 | 1147399 | exonuclease 1               | Exo1  | 305000 | 1,03 | up   |
| 6245441 | 7108122 | 1147391 | exonuclease 1               | Exo1  | 305000 | 1,69 | down |
| 6303091 | 7108122 | 1147394 | exonuclease 1               | Exo1  | 305000 | 1,11 | up   |
| 6357440 | 7108122 | 1147398 | exonuclease 1               | Exo1  | 305000 | 1,44 | up   |
| 6357667 | 7108122 | 1147394 | exonuclease 1               | Exo1  | 305000 | 1,13 | down |
| 6426185 | 7108122 | 1147393 | exonuclease 1               | Exo1  | 305000 | 1,02 | down |
| 6592124 | 7108122 | 1147397 | exonuclease 1               | Exo1  | 305000 | 1,00 | up   |
| 5756362 | 7198274 | 1371202 | exostoses (multiple)-like 2 | Extl2 | 310803 | 1,02 | up   |
| 5762472 | 7198274 | 1371203 | exostoses (multiple)-like 2 | Extl2 | 310803 | 1,52 | up   |
| 5868212 | 7198274 | 1371201 | exostoses (multiple)-like 2 | Extl2 | 310803 | 2,22 | down |
| 6021498 | 7198274 | 1371199 | exostoses (multiple)-like 2 | Extl2 | 310803 | 1,21 | up   |
| 6043251 | 7198274 | 1371198 | exostoses (multiple)-like 2 | Extl2 | 310803 | 3,12 | down |
| 6139240 | 7198274 | 1371195 | exostoses (multiple)-like 2 | Extl2 | 310803 | 1,30 | down |
| 6536677 | 7198274 | 1371201 | exostoses (multiple)-like 2 | Extl2 | 310803 | 1,49 | up   |
| 6565188 | 7198274 | 1371204 | exostoses (multiple)-like 2 | Extl2 | 310803 | 1,15 | down |
| 6576420 | 7198274 | 1371195 | exostoses (multiple)-like 2 | Extl2 | 310803 | 1,54 | up   |
| 5636570 | 7359659 | 1768810 | exportin 5                  | Xpo5  | 363194 | 1,19 | down |
| 5666150 | 7359659 | 1768805 | exportin 5                  | Xpo5  | 363194 | 1,21 | down |
| 5687462 | 7359659 | 1768828 | exportin 5                  | Xpo5  | 363194 | 1,28 | down |
| 5729029 | 7359659 | 1768827 | exportin 5                  | Xpo5  | 363194 | 1,14 | up   |
| 5772288 | 7359659 | 1768808 | exportin 5                  | Xpo5  | 363194 | 1,16 | up   |
| 5824334 | 7359659 | 1768824 | exportin 5                  | Xpo5  | 363194 | 1,11 | up   |
| 5833877 | 7359659 | 1768829 | exportin 5                  | Xpo5  | 363194 | 1,05 | up   |
| 5883260 | 7359659 | 1768818 | exportin 5                  | Xpo5  | 363194 | 1,27 | down |
| 5893037 | 7359659 | 1768823 | exportin 5                  | Xpo5  | 363194 | 1,27 | down |
| 5919562 | 7359659 | 1768838 | exportin 5                  | Xpo5  | 363194 | 1,14 | up   |
| 5935858 | 7359659 | 1768821 | exportin 5                  | Xpo5  | 363194 | 1,00 | up   |
| 5940716 | 7359659 | 1768832 | exportin 5                  | Xpo5  | 363194 | 1,09 | down |
| 6028102 | 7359659 | 1768805 | exportin 5                  | Xpo5  | 363194 | 1,21 | down |
| 6030052 | 7359659 | 1768816 | exportin 5                  | Xpo5  | 363194 | 1,07 | up   |
| 6050461 | 7359659 | 1768822 | exportin 5                  | Xpo5  | 363194 | 1,19 | up   |
| 6109454 | 7359659 | 1768827 | exportin 5                  | Xpo5  | 363194 | 1,52 | up   |
| 6171928 | 7359659 | 1768837 | exportin 5                  | Xpo5  | 363194 | 1,22 | up   |
| 6173938 | 7359659 | 1768834 | exportin 5                  | Xpo5  | 363194 | 1,09 | down |
| 6269251 | 7359659 | 1768817 | exportin 5                  | Xpo5  | 363194 | 1,06 | up   |
| 6321340 | 7359659 | 1768841 | exportin 5                  | Xpo5  | 363194 | 1,27 | up   |
| 6328553 | 7359659 | 1768826 | exportin 5                  | Xpo5  | 363194 | 1,01 | up   |
| 6350944 | 7359659 | 1768835 | exportin 5                  | Xpo5  | 363194 | 1,23 | up   |
| 6363199 | 7359659 | 1768814 | exportin 5                  | Xpo5  | 363194 | 1,01 | down |
| 6368301 | 7359659 | 1768814 | exportin 5                  | Xpo5  | 363194 | 1,21 | down |
| 6374654 | 7359659 | 1768831 | exportin 5                  | Xpo5  | 363194 | 1,22 | down |
| 6423477 | 7359659 | 1768840 | exportin 5                  | Xpo5  | 363194 | 1,12 | down |
| 6429017 | 7359659 | 1768840 | exportin 5                  | Xpo5  | 363194 | 1,34 | down |
| 6441825 | 7359659 | 1768809 | exportin 5                  | Xpo5  | 363194 | 1,01 | down |
| 6470723 | 7359659 | 1768825 | exportin 5                  | Xpo5  | 363194 | 1,71 | down |
| 6472764 | 7359659 | 1768806 | exportin 5                  | Xpo5  | 363194 | 1,06 | up   |
| 6499688 | 7359659 | 1768804 | exportin 5                  | Xpo5  | 363194 | 1,15 | down |
| 6520543 | 7359659 | 1768812 | exportin 5                  | Xpo5  | 363194 | 1,05 | up   |
| 6524251 | 7359659 | 1768813 | exportin 5                  | Xpo5  | 363194 | 1,15 | down |
| 6584382 | 7359659 | 1768839 | exportin 5                  | Xpo5  | 363194 | 1,22 | down |
| 6621078 | 7359659 | 1768836 | exportin 5                  | Xpo5  | 363194 | 2,80 | down |
| 6648859 | 7359659 | 1768831 | exportin 5                  | Xpo5  | 363194 | 1,22 | up   |

|         |         |         |                                                |          |        |      |      |
|---------|---------|---------|------------------------------------------------|----------|--------|------|------|
| 6671387 | 7359659 | 1768804 | exportin 5                                     | Xpo5     | 363194 | 1,25 | down |
| 6699050 | 7359659 | 1768841 | exportin 5                                     | Xpo5     | 363194 | 1,27 | down |
| 6701413 | 7359659 | 1768830 | exportin 5                                     | Xpo5     | 363194 | 1,18 | up   |
| 6710615 | 7359659 | 1768811 | exportin 5                                     | Xpo5     | 363194 | 1,21 | up   |
| 5744745 | 7321029 | 1674833 | extra spindle poles like 1 (S. cerevisiae)     | Esp1l    | 315330 | 1,40 | up   |
| 6378791 | 7321029 | 1674802 | extra spindle poles like 1 (S. cerevisiae)     | Esp1l    | 315330 | 1,16 | up   |
| 5627004 | 7046271 | 1001494 | ezrin                                          | Ezr      | 54319  | 1,03 | down |
| 5964755 | 7046271 | 1001492 | ezrin                                          | Ezr      | 54319  | 1,33 | up   |
| 5980531 | 7046271 | 1001484 | ezrin                                          | Ezr      | 54319  | 1,43 | up   |
| 5998117 | 7046271 | 1001488 | ezrin                                          | Ezr      | 54319  | 1,19 | down |
| 6011763 | 7046271 | 1001491 | ezrin                                          | Ezr      | 54319  | 1,17 | down |
| 6014334 | 7046271 | 1001486 | ezrin                                          | Ezr      | 54319  | 1,27 | down |
| 6077667 | 7046271 | 1001489 | ezrin                                          | Ezr      | 54319  | 1,14 | up   |
| 6196438 | 7046271 | 1001495 | ezrin                                          | Ezr      | 54319  | 2,42 | down |
| 6215634 | 7046271 | 1001487 | ezrin                                          | Ezr      | 54319  | 1,05 | up   |
| 6223958 | 7046271 | 1001493 | ezrin                                          | Ezr      | 54319  | 1,29 | up   |
| 6232116 | 7046271 | 1001485 | ezrin                                          | Ezr      | 54319  | 2,52 | down |
| 6358476 | 7046271 | 1001482 | ezrin                                          | Ezr      | 54319  | 1,04 | down |
| 6639910 | 7046271 | 1001483 | ezrin                                          | Ezr      | 54319  | 1,20 | down |
| 6693990 | 7046271 | 1001490 | ezrin                                          | Ezr      | 54319  | 1,48 | up   |
| 6711053 | 7046271 | 1001495 | ezrin                                          | Ezr      | 54319  | 2,93 | down |
| 5629914 | 7107804 | 1146530 | F11 receptor                                   | F11r     | 116479 | 1,33 | up   |
| 5634060 | 7107804 | 1146528 | F11 receptor                                   | F11r     | 116479 | 1,04 | down |
| 5697156 | 7107804 | 1146531 | F11 receptor                                   | F11r     | 116479 | 1,30 | down |
| 5737172 | 7107804 | 1146534 | F11 receptor                                   | F11r     | 116479 | 1,14 | up   |
| 5793848 | 7107804 | 1146532 | F11 receptor                                   | F11r     | 116479 | 1,64 | down |
| 5953358 | 7107804 | 1146533 | F11 receptor                                   | F11r     | 116479 | 1,22 | up   |
| 5991939 | 7107804 | 1146535 | F11 receptor                                   | F11r     | 116479 | 2,23 | down |
| 6018772 | 7107804 | 1146536 | F11 receptor                                   | F11r     | 116479 | 1,11 | up   |
| 6093242 | 7107804 | 1146536 | F11 receptor                                   | F11r     | 116479 | 1,69 | up   |
| 6229310 | 7107804 | 1146536 | F11 receptor                                   | F11r     | 116479 | 1,11 | up   |
| 6538272 | 7107804 | 1146529 | F11 receptor                                   | F11r     | 116479 | 1,40 | down |
| 5758205 | 7079887 | 1079286 | family with sequence similarity 101, member B  | Fam101b  | 287534 | 1,84 | down |
| 6029108 | 7079887 | 1079286 | family with sequence similarity 101, member B  | Fam101b  | 287534 | 1,14 | down |
| 6127903 | 7079887 | 1079287 | family with sequence similarity 101, member B  | Fam101b  | 287534 | 1,22 | up   |
| 6291784 | 7079887 | 1079288 | family with sequence similarity 101, member B  | Fam101b  | 287534 | 1,08 | up   |
| 6350902 | 7079887 | 1079288 | family with sequence similarity 101, member B  | Fam101b  | 287534 | 3,05 | down |
| 5734047 | 7053878 | 1018355 | family with sequence similarity 108, member C1 | Fam108c1 | 361601 | 1,08 | down |
| 5918365 | 7053878 | 1018354 | family with sequence similarity 108, member C1 | Fam108c1 | 361601 | 1,21 | up   |
| 5955296 | 7053878 | 1018369 | family with sequence similarity 108, member C1 | Fam108c1 | 361601 | 1,15 | down |
| 6242960 | 7053878 | 1018368 | family with sequence similarity 108, member C1 | Fam108c1 | 361601 | 1,03 | up   |
| 6350288 | 7053878 | 1018354 | family with sequence similarity 108, member C1 | Fam108c1 | 361601 | 1,10 | up   |
| 6413748 | 7053878 | 1018369 | family with sequence similarity 108, member C1 | Fam108c1 | 361601 | 1,01 | up   |
| 6646597 | 7053878 | 1018369 | family with sequence similarity 108, member C1 | Fam108c1 | 361601 | 1,38 | up   |
| 6673019 | 7053878 | 1018369 | family with sequence similarity 108, member C1 | Fam108c1 | 361601 | 2,49 | down |
| 5972462 | 7264274 | 1533164 | family with sequence similarity 115, member C  | Fam115c  | 680422 | 2,05 | down |
| 6515789 | 7264274 | 1533165 | family with sequence similarity 115, member C  | Fam115c  | 680422 | 1,32 | down |
| 5667027 | 7142853 | 1232896 | family with sequence similarity 116, member A  | Fam116a  | 306229 | 1,18 | down |
| 5679600 | 7142853 | 1232903 | family with sequence similarity 116, member A  | Fam116a  | 306229 | 1,34 | up   |
| 5684288 | 7142853 | 1232902 | family with sequence similarity 116, member A  | Fam116a  | 306229 | 1,08 | down |
| 5743322 | 7142853 | 1232888 | family with sequence similarity 116, member A  | Fam116a  | 306229 | 1,44 | up   |
| 5853330 | 7142853 | 1232901 | family with sequence similarity 116, member A  | Fam116a  | 306229 | 1,01 | up   |
| 5876784 | 7142853 | 1232898 | family with sequence similarity 116, member A  | Fam116a  | 306229 | 1,18 | down |
| 5914517 | 7142853 | 1232899 | family with sequence similarity 116, member A  | Fam116a  | 306229 | 2,01 | down |
| 5965800 | 7142853 | 1232890 | family with sequence similarity 116, member A  | Fam116a  | 306229 | 1,27 | down |
| 6010300 | 7142853 | 1232905 | family with sequence similarity 116, member A  | Fam116a  | 306229 | 1,39 | down |

|         |         |         |                                               |         |        |      |      |
|---------|---------|---------|-----------------------------------------------|---------|--------|------|------|
| 6169470 | 7142853 | 1232897 | family with sequence similarity 116, member A | Fam116a | 306229 | 1,54 | down |
| 6196506 | 7142853 | 1232903 | family with sequence similarity 116, member A | Fam116a | 306229 | 1,35 | up   |
| 6299151 | 7142853 | 1232907 | family with sequence similarity 116, member A | Fam116a | 306229 | 1,08 | up   |
| 6344897 | 7142853 | 1232895 | family with sequence similarity 116, member A | Fam116a | 306229 | 1,11 | up   |
| 6375246 | 7142853 | 1232886 | family with sequence similarity 116, member A | Fam116a | 306229 | 1,24 | up   |
| 6422556 | 7142853 | 1232900 | family with sequence similarity 116, member A | Fam116a | 306229 | 1,03 | up   |
| 6468081 | 7142853 | 1232907 | family with sequence similarity 116, member A | Fam116a | 306229 | 1,24 | down |
| 6514403 | 7142853 | 1232893 | family with sequence similarity 116, member A | Fam116a | 306229 | 1,31 | down |
| 6516333 | 7142853 | 1232884 | family with sequence similarity 116, member A | Fam116a | 306229 | 1,38 | up   |
| 6535727 | 7142853 | 1232894 | family with sequence similarity 116, member A | Fam116a | 306229 | 1,00 | down |
| 6570105 | 7142853 | 1232889 | family with sequence similarity 116, member A | Fam116a | 306229 | 1,06 | up   |
| 6598419 | 7142853 | 1232895 | family with sequence similarity 116, member A | Fam116a | 306229 | 1,48 | down |
| 6602654 | 7142853 | 1232887 | family with sequence similarity 116, member A | Fam116a | 306229 | 1,04 | down |
| 6650257 | 7142853 | 1232895 | family with sequence similarity 116, member A | Fam116a | 306229 | 1,08 | up   |
| 6657688 | 7142853 | 1232891 | family with sequence similarity 116, member A | Fam116a | 306229 | 1,11 | up   |
| 5618884 | 7330727 | 1697143 | family with sequence similarity 116, member B | Fam116b | 362983 | 1,17 | down |
| 5641749 | 7330727 | 1697140 | family with sequence similarity 116, member B | Fam116b | 362983 | 1,04 | down |
| 5643326 | 7330727 | 1697144 | family with sequence similarity 116, member B | Fam116b | 362983 | 1,09 | down |
| 5724036 | 7330727 | 1697145 | family with sequence similarity 116, member B | Fam116b | 362983 | 1,26 | down |
| 5753407 | 7330727 | 1697141 | family with sequence similarity 116, member B | Fam116b | 362983 | 1,20 | down |
| 5767774 | 7330727 | 1697157 | family with sequence similarity 116, member B | Fam116b | 362983 | 1,82 | up   |
| 5851333 | 7330727 | 1697142 | family with sequence similarity 116, member B | Fam116b | 362983 | 1,40 | down |
| 5865839 | 7330727 | 1697152 | family with sequence similarity 116, member B | Fam116b | 362983 | 1,26 | up   |
| 5950337 | 7330727 | 1697143 | family with sequence similarity 116, member B | Fam116b | 362983 | 1,03 | down |
| 5982776 | 7330727 | 1697139 | family with sequence similarity 116, member B | Fam116b | 362983 | 1,06 | up   |
| 6041763 | 7330727 | 1697143 | family with sequence similarity 116, member B | Fam116b | 362983 | 1,41 | down |
| 6097451 | 7330727 | 1697148 | family with sequence similarity 116, member B | Fam116b | 362983 | 1,03 | up   |
| 6227625 | 7330727 | 1697141 | family with sequence similarity 116, member B | Fam116b | 362983 | 1,19 | down |
| 6356158 | 7330727 | 1697150 | family with sequence similarity 116, member B | Fam116b | 362983 | 1,39 | down |
| 6466215 | 7330727 | 1697144 | family with sequence similarity 116, member B | Fam116b | 362983 | 1,25 | down |
| 6586103 | 7330727 | 1697157 | family with sequence similarity 116, member B | Fam116b | 362983 | 1,24 | up   |
| 6597524 | 7330727 | 1697151 | family with sequence similarity 116, member B | Fam116b | 362983 | 1,19 | down |
| 6628124 | 7330727 | 1697146 | family with sequence similarity 116, member B | Fam116b | 362983 | 1,29 | down |
| 6676030 | 7330727 | 1697149 | family with sequence similarity 116, member B | Fam116b | 362983 | 1,12 | up   |
| 6678572 | 7330727 | 1697153 | family with sequence similarity 116, member B | Fam116b | 362983 | 1,31 | up   |
| 6697341 | 7330727 | 1697147 | family with sequence similarity 116, member B | Fam116b | 362983 | 1,13 | up   |
| 5723025 | 7319486 | 1670941 | family with sequence similarity 118, member A | Fam118a | 300120 | 1,58 | down |
| 5789308 | 7319486 | 1670938 | family with sequence similarity 118, member A | Fam118a | 300120 | 1,18 | down |
| 5853934 | 7319486 | 1670936 | family with sequence similarity 118, member A | Fam118a | 300120 | 1,17 | down |
| 5859105 | 7319486 | 1670943 | family with sequence similarity 118, member A | Fam118a | 300120 | 1,24 | down |
| 6050409 | 7319486 | 1670934 | family with sequence similarity 118, member A | Fam118a | 300120 | 1,88 | up   |
| 6391434 | 7319486 | 1670933 | family with sequence similarity 118, member A | Fam118a | 300120 | 1,17 | up   |
| 6399433 | 7319486 | 1670937 | family with sequence similarity 118, member A | Fam118a | 300120 | 1,04 | down |
| 6663765 | 7319486 | 1670940 | family with sequence similarity 118, member A | Fam118a | 300120 | 1,07 | down |
| 6546594 | 7363132 | 1776956 | family with sequence similarity 119, member A | Fam119a | 301466 | 1,08 | up   |
| 5628281 | 7027797 | 956311  | family with sequence similarity 120B          | Fam120b | 308218 | 1,17 | down |
| 5646655 | 7027797 | 956285  | family with sequence similarity 120B          | Fam120b | 308218 | 1,40 | down |
| 5647247 | 7027797 | 956303  | family with sequence similarity 120B          | Fam120b | 308218 | 1,31 | down |
| 5754832 | 7027797 | 956297  | family with sequence similarity 120B          | Fam120b | 308218 | 1,11 | up   |
| 5955088 | 7027797 | 956309  | family with sequence similarity 120B          | Fam120b | 308218 | 1,02 | down |
| 5975472 | 7027797 | 956297  | family with sequence similarity 120B          | Fam120b | 308218 | 1,06 | up   |
| 5984800 | 7027797 | 956286  | family with sequence similarity 120B          | Fam120b | 308218 | 1,26 | down |
| 6029453 | 7027797 | 956279  | family with sequence similarity 120B          | Fam120b | 308218 | 1,21 | up   |
| 6034000 | 7027797 | 956277  | family with sequence similarity 120B          | Fam120b | 308218 | 1,20 | down |
| 6074497 | 7027797 | 956278  | family with sequence similarity 120B          | Fam120b | 308218 | 1,02 | down |
| 6166177 | 7027797 | 956311  | family with sequence similarity 120B          | Fam120b | 308218 | 1,43 | down |

|         |         |         |                                               |         |        |      |      |
|---------|---------|---------|-----------------------------------------------|---------|--------|------|------|
| 6253550 | 7027797 | 956277  | family with sequence similarity 120B          | Fam120b | 308218 | 1,08 | down |
| 6443764 | 7027797 | 956300  | family with sequence similarity 120B          | Fam120b | 308218 | 1,09 | up   |
| 6448383 | 7027797 | 956304  | family with sequence similarity 120B          | Fam120b | 308218 | 1,14 | down |
| 6557317 | 7027797 | 956278  | family with sequence similarity 120B          | Fam120b | 308218 | 1,06 | up   |
| 6685914 | 7027797 | 956311  | family with sequence similarity 120B          | Fam120b | 308218 | 1,58 | down |
| 6691266 | 7027797 | 956277  | family with sequence similarity 120B          | Fam120b | 308218 | 1,03 | up   |
| 5637412 | 7226301 | 1438088 | family with sequence similarity 129, member B | Fam129b | 362115 | 2,10 | down |
| 5646268 | 7226301 | 1438092 | family with sequence similarity 129, member B | Fam129b | 362115 | 1,07 | down |
| 5806211 | 7226301 | 1438095 | family with sequence similarity 129, member B | Fam129b | 362115 | 1,01 | down |
| 5846382 | 7226301 | 1438094 | family with sequence similarity 129, member B | Fam129b | 362115 | 1,23 | down |
| 5970134 | 7226301 | 1438095 | family with sequence similarity 129, member B | Fam129b | 362115 | 1,02 | up   |
| 6037358 | 7226301 | 1438083 | family with sequence similarity 129, member B | Fam129b | 362115 | 1,09 | up   |
| 6105731 | 7226301 | 1438082 | family with sequence similarity 129, member B | Fam129b | 362115 | 1,13 | up   |
| 6121811 | 7226301 | 1438089 | family with sequence similarity 129, member B | Fam129b | 362115 | 1,13 | down |
| 6269685 | 7226301 | 1438087 | family with sequence similarity 129, member B | Fam129b | 362115 | 1,70 | up   |
| 6280408 | 7226301 | 1438090 | family with sequence similarity 129, member B | Fam129b | 362115 | 1,07 | down |
| 6350865 | 7226301 | 1438084 | family with sequence similarity 129, member B | Fam129b | 362115 | 1,20 | up   |
| 6438391 | 7226301 | 1438091 | family with sequence similarity 129, member B | Fam129b | 362115 | 1,12 | down |
| 6456884 | 7226301 | 1438093 | family with sequence similarity 129, member B | Fam129b | 362115 | 1,09 | up   |
| 6557675 | 7226301 | 1438071 | family with sequence similarity 129, member B | Fam129b | 362115 | 1,26 | up   |
| 6648798 | 7226301 | 1438081 | family with sequence similarity 129, member B | Fam129b | 362115 | 1,35 | down |
| 5634267 | 7265259 | 1535458 | family with sequence similarity 13, member A1 | Fam13a1 | 362378 | 1,58 | up   |
| 5685013 | 7265259 | 1535465 | family with sequence similarity 13, member A1 | Fam13a1 | 362378 | 1,60 | up   |
| 5869013 | 7265259 | 1535461 | family with sequence similarity 13, member A1 | Fam13a1 | 362378 | 1,05 | down |
| 6071666 | 7265259 | 1535456 | family with sequence similarity 13, member A1 | Fam13a1 | 362378 | 1,03 | up   |
| 6358265 | 7265259 | 1535459 | family with sequence similarity 13, member A1 | Fam13a1 | 362378 | 1,09 | down |
| 6400993 | 7265259 | 1535457 | family with sequence similarity 13, member A1 | Fam13a1 | 362378 | 1,17 | up   |
| 6468125 | 7265259 | 1535449 | family with sequence similarity 13, member A1 | Fam13a1 | 362378 | 1,41 | up   |
| 6498203 | 7265259 | 1535468 | family with sequence similarity 13, member A1 | Fam13a1 | 362378 | 1,53 | down |
| 6692468 | 7265259 | 1535438 | family with sequence similarity 13, member A1 | Fam13a1 | 362378 | 1,38 | down |
| 6707068 | 7265259 | 1535451 | family with sequence similarity 13, member A1 | Fam13a1 | 362378 | 1,35 | down |
| 5679579 | 7222221 | 1428051 | family with sequence similarity 13, member C1 | Fam13c1 | 294565 | 1,37 | down |
| 5813690 | 7222221 | 1428050 | family with sequence similarity 13, member C1 | Fam13c1 | 294565 | 1,06 | down |
| 6613057 | 7222221 | 1428050 | family with sequence similarity 13, member C1 | Fam13c1 | 294565 | 1,17 | down |
| 6682551 | 7222221 | 1428054 | family with sequence similarity 13, member C1 | Fam13c1 | 294565 | 1,16 | down |
| 6045628 | 7337492 | 1713401 | family with sequence similarity 148, member B | Fam148b | 501015 | 1,11 | down |
| 6412533 | 7337492 | 1713404 | family with sequence similarity 148, member B | Fam148b | 501015 | 1,89 | down |
| 5677659 | 7278029 | 1568161 | family with sequence similarity 151, member A | Fam151a | 313430 | 1,26 | down |
| 5892740 | 7278029 | 1568165 | family with sequence similarity 151, member A | Fam151a | 313430 | 1,08 | down |
| 5917912 | 7278029 | 1568159 | family with sequence similarity 151, member A | Fam151a | 313430 | 1,06 | down |
| 6055715 | 7278029 | 1568160 | family with sequence similarity 151, member A | Fam151a | 313430 | 1,04 | down |
| 6102659 | 7278029 | 1568165 | family with sequence similarity 151, member A | Fam151a | 313430 | 1,02 | down |
| 6125289 | 7278029 | 1568166 | family with sequence similarity 151, member A | Fam151a | 313430 | 1,06 | up   |
| 6158027 | 7278029 | 1568163 | family with sequence similarity 151, member A | Fam151a | 313430 | 1,15 | up   |
| 6194790 | 7278029 | 1568164 | family with sequence similarity 151, member A | Fam151a | 313430 | 1,22 | up   |
| 6267937 | 7278029 | 1568167 | family with sequence similarity 151, member A | Fam151a | 313430 | 2,19 | up   |
| 6708024 | 7278029 | 1568162 | family with sequence similarity 151, member A | Fam151a | 313430 | 1,30 | down |
| 5812912 | 7034603 | 972874  | family with sequence similarity 168, member A | Fam168a | 361614 | 1,16 | up   |
| 5858181 | 7034603 | 972867  | family with sequence similarity 168, member A | Fam168a | 361614 | 1,12 | up   |
| 5952207 | 7034603 | 972870  | family with sequence similarity 168, member A | Fam168a | 361614 | 1,34 | down |
| 6019390 | 7034603 | 972860  | family with sequence similarity 168, member A | Fam168a | 361614 | 1,11 | up   |
| 6150064 | 7034603 | 972860  | family with sequence similarity 168, member A | Fam168a | 361614 | 1,18 | down |
| 6158854 | 7034603 | 972877  | family with sequence similarity 168, member A | Fam168a | 361614 | 1,68 | down |
| 6226302 | 7034603 | 972865  | family with sequence similarity 168, member A | Fam168a | 361614 | 1,19 | down |
| 6267835 | 7034603 | 972877  | family with sequence similarity 168, member A | Fam168a | 361614 | 1,31 | up   |
| 6368953 | 7034603 | 972876  | family with sequence similarity 168, member A | Fam168a | 361614 | 2,07 | up   |

|         |         |         |                                               |         |        |      |      |
|---------|---------|---------|-----------------------------------------------|---------|--------|------|------|
| 6514662 | 7034603 | 972877  | family with sequence similarity 168, member A | Fam168a | 361614 | 1,26 | down |
| 6639757 | 7034603 | 972871  | family with sequence similarity 168, member A | Fam168a | 361614 | 1,06 | up   |
| 6669812 | 7034603 | 972877  | family with sequence similarity 168, member A | Fam168a | 361614 | 1,11 | up   |
| 6726997 | 7034603 | 972876  | family with sequence similarity 168, member A | Fam168a | 361614 | 1,02 | up   |
| 6737381 | 7034603 | 972875  | family with sequence similarity 168, member A | Fam168a | 361614 | 1,56 | down |
| 5808024 | 7263652 | 1531642 | family with sequence similarity 180, member A | Fam180a | 362336 | 1,00 | down |
| 5815241 | 7263652 | 1531630 | family with sequence similarity 180, member A | Fam180a | 362336 | 1,10 | up   |
| 5893337 | 7263652 | 1531632 | family with sequence similarity 180, member A | Fam180a | 362336 | 1,92 | down |
| 6134898 | 7263652 | 1531630 | family with sequence similarity 180, member A | Fam180a | 362336 | 1,04 | down |
| 6378858 | 7263652 | 1531642 | family with sequence similarity 180, member A | Fam180a | 362336 | 1,14 | down |
| 6477568 | 7263652 | 1531642 | family with sequence similarity 180, member A | Fam180a | 362336 | 2,09 | up   |
| 5625477 | 7262735 | 1529350 | family with sequence similarity 3, member C   | Fam3c   | 312159 | 1,13 | down |
| 5805083 | 7262735 | 1529343 | family with sequence similarity 3, member C   | Fam3c   | 312159 | 2,14 | up   |
| 5810532 | 7262735 | 1529349 | family with sequence similarity 3, member C   | Fam3c   | 312159 | 1,22 | up   |
| 5857298 | 7262735 | 1529347 | family with sequence similarity 3, member C   | Fam3c   | 312159 | 1,05 | down |
| 6096157 | 7262735 | 1529351 | family with sequence similarity 3, member C   | Fam3c   | 312159 | 1,81 | down |
| 6528183 | 7262735 | 1529344 | family with sequence similarity 3, member C   | Fam3c   | 312159 | 1,00 | down |
| 6575416 | 7262735 | 1529348 | family with sequence similarity 3, member C   | Fam3c   | 312159 | 1,01 | up   |
| 6652637 | 7262735 | 1529345 | family with sequence similarity 3, member C   | Fam3c   | 312159 | 1,14 | down |
| 6711800 | 7262735 | 1529352 | family with sequence similarity 3, member C   | Fam3c   | 312159 | 1,13 | up   |
| 6717882 | 7262735 | 1529346 | family with sequence similarity 3, member C   | Fam3c   | 312159 | 1,36 | down |
| 5625040 | 7186305 | 1341021 | family with sequence similarity 38, member A  | Fam38a  | 361430 | 1,13 | down |
| 5643889 | 7186305 | 1341026 | family with sequence similarity 38, member A  | Fam38a  | 361430 | 1,25 | up   |
| 5696497 | 7186305 | 1341018 | family with sequence similarity 38, member A  | Fam38a  | 361430 | 1,91 | down |
| 5717490 | 7186305 | 1341014 | family with sequence similarity 38, member A  | Fam38a  | 361430 | 1,35 | up   |
| 5788053 | 7186305 | 1341009 | family with sequence similarity 38, member A  | Fam38a  | 361430 | 1,06 | down |
| 5842430 | 7186305 | 1341029 | family with sequence similarity 38, member A  | Fam38a  | 361430 | 2,07 | up   |
| 5851283 | 7186305 | 1341007 | family with sequence similarity 38, member A  | Fam38a  | 361430 | 1,34 | up   |
| 5904210 | 7186305 | 1341005 | family with sequence similarity 38, member A  | Fam38a  | 361430 | 1,14 | down |
| 5904510 | 7186305 | 1341034 | family with sequence similarity 38, member A  | Fam38a  | 361430 | 1,61 | up   |
| 5920884 | 7186305 | 1341017 | family with sequence similarity 38, member A  | Fam38a  | 361430 | 1,09 | down |
| 5921878 | 7186305 | 1341025 | family with sequence similarity 38, member A  | Fam38a  | 361430 | 2,07 | up   |
| 5936354 | 7186305 | 1341030 | family with sequence similarity 38, member A  | Fam38a  | 361430 | 1,51 | up   |
| 5956434 | 7186305 | 1341020 | family with sequence similarity 38, member A  | Fam38a  | 361430 | 1,07 | down |
| 5982484 | 7186305 | 1341002 | family with sequence similarity 38, member A  | Fam38a  | 361430 | 1,17 | down |
| 5983257 | 7186305 | 1341024 | family with sequence similarity 38, member A  | Fam38a  | 361430 | 1,93 | up   |
| 5996057 | 7186305 | 1341027 | family with sequence similarity 38, member A  | Fam38a  | 361430 | 1,03 | down |
| 6026242 | 7186305 | 1341012 | family with sequence similarity 38, member A  | Fam38a  | 361430 | 1,20 | down |
| 6040124 | 7186305 | 1341031 | family with sequence similarity 38, member A  | Fam38a  | 361430 | 1,14 | down |
| 6113456 | 7186305 | 1341002 | family with sequence similarity 38, member A  | Fam38a  | 361430 | 1,30 | up   |
| 6155431 | 7186305 | 1341006 | family with sequence similarity 38, member A  | Fam38a  | 361430 | 1,18 | up   |
| 6164727 | 7186305 | 1341023 | family with sequence similarity 38, member A  | Fam38a  | 361430 | 1,03 | down |
| 6224105 | 7186305 | 1341010 | family with sequence similarity 38, member A  | Fam38a  | 361430 | 1,35 | up   |
| 6224494 | 7186305 | 1341032 | family with sequence similarity 38, member A  | Fam38a  | 361430 | 1,26 | up   |
| 6254469 | 7186305 | 1341019 | family with sequence similarity 38, member A  | Fam38a  | 361430 | 1,87 | up   |
| 6361095 | 7186305 | 1341022 | family with sequence similarity 38, member A  | Fam38a  | 361430 | 1,31 | up   |
| 6366856 | 7186305 | 1341028 | family with sequence similarity 38, member A  | Fam38a  | 361430 | 2,01 | up   |
| 6367621 | 7186305 | 1341001 | family with sequence similarity 38, member A  | Fam38a  | 361430 | 1,06 | down |
| 6388338 | 7186305 | 1341002 | family with sequence similarity 38, member A  | Fam38a  | 361430 | 1,07 | up   |
| 6402612 | 7186305 | 1341000 | family with sequence similarity 38, member A  | Fam38a  | 361430 | 1,26 | down |
| 6419363 | 7186305 | 1341002 | family with sequence similarity 38, member A  | Fam38a  | 361430 | 1,07 | down |
| 6435571 | 7186305 | 1341033 | family with sequence similarity 38, member A  | Fam38a  | 361430 | 4,27 | up   |
| 6442497 | 7186305 | 1341009 | family with sequence similarity 38, member A  | Fam38a  | 361430 | 1,57 | down |
| 6455989 | 7186305 | 1341011 | family with sequence similarity 38, member A  | Fam38a  | 361430 | 1,31 | up   |
| 6535303 | 7186305 | 1341013 | family with sequence similarity 38, member A  | Fam38a  | 361430 | 1,11 | up   |
| 6554457 | 7186305 | 1341004 | family with sequence similarity 38, member A  | Fam38a  | 361430 | 1,45 | up   |



|         |         |         |                                              |        |        |      |      |
|---------|---------|---------|----------------------------------------------|--------|--------|------|------|
| 6592713 | 7186305 | 1341035 | family with sequence similarity 38, member A | Fam38a | 361430 | 1,33 | up   |
| 6679579 | 7186305 | 1341008 | family with sequence similarity 38, member A | Fam38a | 361430 | 1,20 | up   |
| 6727258 | 7186305 | 1341031 | family with sequence similarity 38, member A | Fam38a | 361430 | 1,26 | down |
| 6728670 | 7186305 | 1341002 | family with sequence similarity 38, member A | Fam38a | 361430 | 1,13 | up   |
| 6741557 | 7186305 | 1341016 | family with sequence similarity 38, member A | Fam38a | 361430 | 1,06 | up   |
| 5635527 | 7094346 | 1113394 | family with sequence similarity 43, member A | Fam43a | 288031 | 1,34 | down |
| 5784576 | 7094346 | 1113394 | family with sequence similarity 43, member A | Fam43a | 288031 | 1,53 | down |
| 5827575 | 7094346 | 1113394 | family with sequence similarity 43, member A | Fam43a | 288031 | 1,17 | down |
| 6018581 | 7094346 | 1113394 | family with sequence similarity 43, member A | Fam43a | 288031 | 1,03 | down |
| 6292534 | 7094346 | 1113394 | family with sequence similarity 43, member A | Fam43a | 288031 | 1,06 | down |
| 6557059 | 7094346 | 1113394 | family with sequence similarity 43, member A | Fam43a | 288031 | 1,19 | up   |
| 5773856 | 7106018 | 1142249 | family with sequence similarity 5, member C  | Fam5c  | 286901 | 1,02 | down |
| 5824598 | 7106018 | 1142242 | family with sequence similarity 5, member C  | Fam5c  | 286901 | 1,11 | down |
| 5891765 | 7106018 | 1142244 | family with sequence similarity 5, member C  | Fam5c  | 286901 | 1,22 | down |
| 5998037 | 7106018 | 1142243 | family with sequence similarity 5, member C  | Fam5c  | 286901 | 1,20 | up   |
| 6245522 | 7106018 | 1142247 | family with sequence similarity 5, member C  | Fam5c  | 286901 | 1,11 | down |
| 6441361 | 7106018 | 1142246 | family with sequence similarity 5, member C  | Fam5c  | 286901 | 1,18 | down |
| 6455754 | 7106018 | 1142247 | family with sequence similarity 5, member C  | Fam5c  | 286901 | 1,16 | up   |
| 6490439 | 7106018 | 1142249 | family with sequence similarity 5, member C  | Fam5c  | 286901 | 1,23 | down |
| 6500186 | 7106018 | 1142248 | family with sequence similarity 5, member C  | Fam5c  | 286901 | 1,03 | up   |
| 6674223 | 7106018 | 1142243 | family with sequence similarity 5, member C  | Fam5c  | 286901 | 1,34 | up   |
| 6732505 | 7106018 | 1142245 | family with sequence similarity 5, member C  | Fam5c  | 286901 | 2,03 | down |
| 5662574 | 7385134 | 1831971 | family with sequence similarity 50, member A | FAM50A | 293862 | 1,37 | down |
| 5709310 | 7385134 | 1831982 | family with sequence similarity 50, member A | FAM50A | 293862 | 1,11 | up   |
| 5745800 | 7385134 | 1831977 | family with sequence similarity 50, member A | FAM50A | 293862 | 2,72 | down |
| 5953947 | 7385134 | 1831975 | family with sequence similarity 50, member A | FAM50A | 293862 | 1,21 | down |
| 5964334 | 7385134 | 1831978 | family with sequence similarity 50, member A | FAM50A | 293862 | 1,04 | up   |
| 5968093 | 7385134 | 1831974 | family with sequence similarity 50, member A | FAM50A | 293862 | 1,15 | up   |
| 6027369 | 7385134 | 1831972 | family with sequence similarity 50, member A | FAM50A | 293862 | 1,60 | down |
| 6059136 | 7385134 | 1831977 | family with sequence similarity 50, member A | FAM50A | 293862 | 1,20 | up   |
| 6417346 | 7385134 | 1831973 | family with sequence similarity 50, member A | FAM50A | 293862 | 1,05 | up   |
| 6423769 | 7385134 | 1831984 | family with sequence similarity 50, member A | FAM50A | 293862 | 1,27 | down |
| 6476457 | 7385134 | 1831984 | family with sequence similarity 50, member A | FAM50A | 293862 | 1,07 | down |
| 6506887 | 7385134 | 1831983 | family with sequence similarity 50, member A | FAM50A | 293862 | 1,30 | down |
| 6530920 | 7385134 | 1831979 | family with sequence similarity 50, member A | FAM50A | 293862 | 1,41 | up   |
| 6681334 | 7385134 | 1831976 | family with sequence similarity 50, member A | FAM50A | 293862 | 1,08 | down |
| 6683772 | 7385134 | 1831980 | family with sequence similarity 50, member A | FAM50A | 293862 | 1,10 | up   |
| 5661378 | 7180620 | 1326393 | family with sequence similarity 65, member A | Fam65a | 291974 | 1,14 | down |
| 5684971 | 7180620 | 1326394 | family with sequence similarity 65, member A | Fam65a | 291974 | 1,27 | down |
| 5738010 | 7180620 | 1326395 | family with sequence similarity 65, member A | Fam65a | 291974 | 1,06 | down |
| 5804200 | 7180620 | 1326394 | family with sequence similarity 65, member A | Fam65a | 291974 | 1,01 | down |
| 5836346 | 7180620 | 1326400 | family with sequence similarity 65, member A | Fam65a | 291974 | 1,13 | up   |
| 5942808 | 7180620 | 1326401 | family with sequence similarity 65, member A | Fam65a | 291974 | 1,22 | down |
| 6033579 | 7180620 | 1326394 | family with sequence similarity 65, member A | Fam65a | 291974 | 1,30 | down |
| 6206806 | 7180620 | 1326404 | family with sequence similarity 65, member A | Fam65a | 291974 | 1,20 | down |
| 6226375 | 7180620 | 1326399 | family with sequence similarity 65, member A | Fam65a | 291974 | 1,07 | down |
| 6316791 | 7180620 | 1326392 | family with sequence similarity 65, member A | Fam65a | 291974 | 1,00 | up   |
| 6356203 | 7180620 | 1326398 | family with sequence similarity 65, member A | Fam65a | 291974 | 1,31 | up   |
| 6358852 | 7180620 | 1326404 | family with sequence similarity 65, member A | Fam65a | 291974 | 2,49 | up   |
| 6405673 | 7180620 | 1326404 | family with sequence similarity 65, member A | Fam65a | 291974 | 1,03 | down |
| 6475696 | 7180620 | 1326397 | family with sequence similarity 65, member A | Fam65a | 291974 | 1,19 | up   |
| 6544680 | 7180620 | 1326396 | family with sequence similarity 65, member A | Fam65a | 291974 | 1,46 | up   |
| 6560926 | 7180620 | 1326394 | family with sequence similarity 65, member A | Fam65a | 291974 | 1,25 | down |
| 6578541 | 7180620 | 1326394 | family with sequence similarity 65, member A | Fam65a | 291974 | 1,11 | up   |
| 6579998 | 7180620 | 1326402 | family with sequence similarity 65, member A | Fam65a | 291974 | 1,50 | up   |
| 6675171 | 7180620 | 1326399 | family with sequence similarity 65, member A | Fam65a | 291974 | 1,39 | down |

|         |         |         |                                              |        |        |      |      |
|---------|---------|---------|----------------------------------------------|--------|--------|------|------|
| 5626213 | 7294264 | 1606853 | family with sequence similarity 82, member A | Fam82a | 313840 | 1,07 | down |
| 5677776 | 7294264 | 1606840 | family with sequence similarity 82, member A | Fam82a | 313840 | 1,03 | down |
| 5799173 | 7294264 | 1606860 | family with sequence similarity 82, member A | Fam82a | 313840 | 1,29 | down |
| 5896127 | 7294264 | 1606860 | family with sequence similarity 82, member A | Fam82a | 313840 | 1,43 | down |
| 5901976 | 7294264 | 1606858 | family with sequence similarity 82, member A | Fam82a | 313840 | 2,20 | down |
| 6002210 | 7294264 | 1606855 | family with sequence similarity 82, member A | Fam82a | 313840 | 1,14 | up   |
| 6012057 | 7294264 | 1606848 | family with sequence similarity 82, member A | Fam82a | 313840 | 1,23 | up   |
| 6026879 | 7294264 | 1606854 | family with sequence similarity 82, member A | Fam82a | 313840 | 1,63 | up   |
| 6073827 | 7294264 | 1606835 | family with sequence similarity 82, member A | Fam82a | 313840 | 1,02 | up   |
| 6110555 | 7294264 | 1606847 | family with sequence similarity 82, member A | Fam82a | 313840 | 1,13 | down |
| 6210645 | 7294264 | 1606860 | family with sequence similarity 82, member A | Fam82a | 313840 | 1,24 | up   |
| 6269592 | 7294264 | 1606846 | family with sequence similarity 82, member A | Fam82a | 313840 | 1,38 | down |
| 6312368 | 7294264 | 1606855 | family with sequence similarity 82, member A | Fam82a | 313840 | 1,17 | down |
| 6326408 | 7294264 | 1606857 | family with sequence similarity 82, member A | Fam82a | 313840 | 1,46 | down |
| 5802722 | 7329075 | 1693379 | family with sequence similarity 83, member H | Fam83h | 362937 | 2,46 | down |
| 5902191 | 7329075 | 1693374 | family with sequence similarity 83, member H | Fam83h | 362937 | 1,29 | up   |
| 5937256 | 7329075 | 1693376 | family with sequence similarity 83, member H | Fam83h | 362937 | 1,13 | up   |
| 6152893 | 7329075 | 1693378 | family with sequence similarity 83, member H | Fam83h | 362937 | 1,17 | up   |
| 6331258 | 7329075 | 1693375 | family with sequence similarity 83, member H | Fam83h | 362937 | 1,11 | up   |
| 6486694 | 7329075 | 1693374 | family with sequence similarity 83, member H | Fam83h | 362937 | 1,08 | up   |
| 5630601 | 7186443 | 1341270 | Fanconi anemia, complementation group A      | Fanca  | 361435 | 1,02 | up   |
| 5698793 | 7186443 | 1341315 | Fanconi anemia, complementation group A      | Fanca  | 361435 | 1,12 | down |
| 5717841 | 7186443 | 1341268 | Fanconi anemia, complementation group A      | Fanca  | 361435 | 1,03 | up   |
| 5737021 | 7186443 | 1341304 | Fanconi anemia, complementation group A      | Fanca  | 361435 | 1,28 | down |
| 5751674 | 7186443 | 1341275 | Fanconi anemia, complementation group A      | Fanca  | 361435 | 1,51 | down |
| 5770230 | 7186443 | 1341276 | Fanconi anemia, complementation group A      | Fanca  | 361435 | 1,61 | down |
| 5787128 | 7186443 | 1341279 | Fanconi anemia, complementation group A      | Fanca  | 361435 | 1,33 | up   |
| 5799785 | 7186443 | 1341302 | Fanconi anemia, complementation group A      | Fanca  | 361435 | 1,19 | down |
| 5823398 | 7186443 | 1341274 | Fanconi anemia, complementation group A      | Fanca  | 361435 | 1,02 | down |
| 5849492 | 7186443 | 1341295 | Fanconi anemia, complementation group A      | Fanca  | 361435 | 1,14 | up   |
| 5851028 | 7186443 | 1341313 | Fanconi anemia, complementation group A      | Fanca  | 361435 | 1,00 | down |
| 5882296 | 7186443 | 1341276 | Fanconi anemia, complementation group A      | Fanca  | 361435 | 1,07 | up   |
| 5972464 | 7186443 | 1341303 | Fanconi anemia, complementation group A      | Fanca  | 361435 | 1,43 | down |
| 5985763 | 7186443 | 1341278 | Fanconi anemia, complementation group A      | Fanca  | 361435 | 1,00 | down |
| 6011116 | 7186443 | 1341298 | Fanconi anemia, complementation group A      | Fanca  | 361435 | 1,21 | up   |
| 6021991 | 7186443 | 1341288 | Fanconi anemia, complementation group A      | Fanca  | 361435 | 1,30 | down |
| 6044000 | 7186443 | 1341308 | Fanconi anemia, complementation group A      | Fanca  | 361435 | 1,01 | up   |
| 6063886 | 7186443 | 1341284 | Fanconi anemia, complementation group A      | Fanca  | 361435 | 1,01 | up   |
| 6064289 | 7186443 | 1341285 | Fanconi anemia, complementation group A      | Fanca  | 361435 | 1,12 | down |
| 6102258 | 7186443 | 1341290 | Fanconi anemia, complementation group A      | Fanca  | 361435 | 2,09 | up   |
| 6133991 | 7186443 | 1341283 | Fanconi anemia, complementation group A      | Fanca  | 361435 | 1,08 | down |
| 6202203 | 7186443 | 1341277 | Fanconi anemia, complementation group A      | Fanca  | 361435 | 1,28 | down |
| 6239861 | 7186443 | 1341282 | Fanconi anemia, complementation group A      | Fanca  | 361435 | 1,10 | down |
| 6260940 | 7186443 | 1341299 | Fanconi anemia, complementation group A      | Fanca  | 361435 | 1,50 | down |
| 6339541 | 7186443 | 1341273 | Fanconi anemia, complementation group A      | Fanca  | 361435 | 1,12 | down |
| 6346839 | 7186443 | 1341300 | Fanconi anemia, complementation group A      | Fanca  | 361435 | 1,60 | up   |
| 6349613 | 7186443 | 1341306 | Fanconi anemia, complementation group A      | Fanca  | 361435 | 1,29 | down |
| 6366004 | 7186443 | 1341271 | Fanconi anemia, complementation group A      | Fanca  | 361435 | 1,33 | down |
| 6392368 | 7186443 | 1341269 | Fanconi anemia, complementation group A      | Fanca  | 361435 | 1,06 | up   |
| 6447225 | 7186443 | 1341272 | Fanconi anemia, complementation group A      | Fanca  | 361435 | 1,07 | up   |
| 6465228 | 7186443 | 1341290 | Fanconi anemia, complementation group A      | Fanca  | 361435 | 1,43 | up   |
| 6496957 | 7186443 | 1341309 | Fanconi anemia, complementation group A      | Fanca  | 361435 | 1,30 | down |
| 6575253 | 7186443 | 1341312 | Fanconi anemia, complementation group A      | Fanca  | 361435 | 1,33 | up   |
| 6590967 | 7186443 | 1341287 | Fanconi anemia, complementation group A      | Fanca  | 361435 | 1,82 | down |
| 6592061 | 7186443 | 1341307 | Fanconi anemia, complementation group A      | Fanca  | 361435 | 2,33 | down |
| 6621055 | 7186443 | 1341305 | Fanconi anemia, complementation group A      | Fanca  | 361435 | 1,02 | up   |

|         |         |         |                                          |         |        |      |      |
|---------|---------|---------|------------------------------------------|---------|--------|------|------|
| 6621210 | 7186443 | 1341292 | Fanconi anemia, complementation group A  | Fanca   | 361435 | 1,23 | up   |
| 6647863 | 7186443 | 1341286 | Fanconi anemia, complementation group A  | Fanca   | 361435 | 1,13 | down |
| 6651042 | 7186443 | 1341278 | Fanconi anemia, complementation group A  | Fanca   | 361435 | 2,27 | down |
| 6671238 | 7186443 | 1341313 | Fanconi anemia, complementation group A  | Fanca   | 361435 | 1,70 | up   |
| 6709719 | 7186443 | 1341289 | Fanconi anemia, complementation group A  | Fanca   | 361435 | 1,04 | down |
| 6715948 | 7186443 | 1341314 | Fanconi anemia, complementation group A  | Fanca   | 361435 | 1,45 | up   |
| 5682969 | 7299527 | 1620601 | farnesyltransferase, CAAX box, beta      | Fntb    | 64511  | 1,26 | up   |
| 5747992 | 7299527 | 1620593 | farnesyltransferase, CAAX box, beta      | Fntb    | 64511  | 1,50 | down |
| 5845013 | 7299527 | 1620596 | farnesyltransferase, CAAX box, beta      | Fntb    | 64511  | 1,53 | up   |
| 5908773 | 7299527 | 1620597 | farnesyltransferase, CAAX box, beta      | Fntb    | 64511  | 1,02 | down |
| 5929049 | 7299527 | 1620592 | farnesyltransferase, CAAX box, beta      | Fntb    | 64511  | 1,01 | down |
| 5934084 | 7299527 | 1620600 | farnesyltransferase, CAAX box, beta      | Fntb    | 64511  | 1,06 | up   |
| 5987774 | 7299527 | 1620594 | farnesyltransferase, CAAX box, beta      | Fntb    | 64511  | 2,37 | up   |
| 6045607 | 7299527 | 1620599 | farnesyltransferase, CAAX box, beta      | Fntb    | 64511  | 1,34 | down |
| 6277294 | 7299527 | 1620595 | farnesyltransferase, CAAX box, beta      | Fntb    | 64511  | 1,32 | down |
| 6280649 | 7299527 | 1620598 | farnesyltransferase, CAAX box, beta      | Fntb    | 64511  | 1,11 | down |
| 6391140 | 7299527 | 1620603 | farnesyltransferase, CAAX box, beta      | Fntb    | 64511  | 1,02 | up   |
| 6479694 | 7299527 | 1620604 | farnesyltransferase, CAAX box, beta      | Fntb    | 64511  | 1,39 | down |
| 6492956 | 7299527 | 1620602 | farnesyltransferase, CAAX box, beta      | Fntb    | 64511  | 1,14 | up   |
| 5709847 | 7041442 | 989067  | Fas (TNF receptor superfamily, member 6) | Fas     | 246097 | 3,10 | up   |
| 5766843 | 7041442 | 989064  | Fas (TNF receptor superfamily, member 6) | Fas     | 246097 | 1,37 | up   |
| 5830281 | 7041442 | 989063  | Fas (TNF receptor superfamily, member 6) | Fas     | 246097 | 1,17 | down |
| 5951208 | 7041442 | 989070  | Fas (TNF receptor superfamily, member 6) | Fas     | 246097 | 2,69 | down |
| 6076806 | 7041442 | 989066  | Fas (TNF receptor superfamily, member 6) | Fas     | 246097 | 2,36 | down |
| 6175052 | 7041442 | 989065  | Fas (TNF receptor superfamily, member 6) | Fas     | 246097 | 1,32 | down |
| 6178910 | 7041442 | 989068  | Fas (TNF receptor superfamily, member 6) | Fas     | 246097 | 1,20 | up   |
| 6202358 | 7041442 | 989070  | Fas (TNF receptor superfamily, member 6) | Fas     | 246097 | 1,71 | down |
| 6240655 | 7041442 | 989069  | Fas (TNF receptor superfamily, member 6) | Fas     | 246097 | 2,19 | down |
| 6250592 | 7041442 | 989062  | Fas (TNF receptor superfamily, member 6) | Fas     | 246097 | 1,21 | up   |
| 6300034 | 7041442 | 989068  | Fas (TNF receptor superfamily, member 6) | Fas     | 246097 | 1,16 | up   |
| 6408797 | 7041442 | 989061  | Fas (TNF receptor superfamily, member 6) | Fas     | 246097 | 1,00 | up   |
| 6574573 | 7041442 | 989070  | Fas (TNF receptor superfamily, member 6) | Fas     | 246097 | 1,12 | up   |
| 6742193 | 7041442 | 989070  | Fas (TNF receptor superfamily, member 6) | Fas     | 246097 | 1,72 | up   |
| 5650036 | 7355302 | 1758272 | FAST kinase domains 2                    | Fastkd2 | 301463 | 2,69 | up   |
| 5715143 | 7355302 | 1758266 | FAST kinase domains 2                    | Fastkd2 | 301463 | 1,03 | down |
| 5940833 | 7355302 | 1758265 | FAST kinase domains 2                    | Fastkd2 | 301463 | 1,30 | down |
| 6068730 | 7355302 | 1758276 | FAST kinase domains 2                    | Fastkd2 | 301463 | 1,13 | up   |
| 6096647 | 7355302 | 1758265 | FAST kinase domains 2                    | Fastkd2 | 301463 | 1,09 | up   |
| 6161488 | 7355302 | 1758274 | FAST kinase domains 2                    | Fastkd2 | 301463 | 1,08 | up   |
| 6197292 | 7355302 | 1758267 | FAST kinase domains 2                    | Fastkd2 | 301463 | 1,10 | up   |
| 6351768 | 7355302 | 1758275 | FAST kinase domains 2                    | Fastkd2 | 301463 | 1,25 | down |
| 6373860 | 7355302 | 1758265 | FAST kinase domains 2                    | Fastkd2 | 301463 | 1,52 | down |
| 6391004 | 7355302 | 1758269 | FAST kinase domains 2                    | Fastkd2 | 301463 | 1,16 | up   |
| 6435081 | 7355302 | 1758265 | FAST kinase domains 2                    | Fastkd2 | 301463 | 1,55 | down |
| 6514477 | 7355302 | 1758269 | FAST kinase domains 2                    | Fastkd2 | 301463 | 1,63 | down |
| 6547550 | 7355302 | 1758271 | FAST kinase domains 2                    | Fastkd2 | 301463 | 1,07 | up   |
| 6556268 | 7355302 | 1758270 | FAST kinase domains 2                    | Fastkd2 | 301463 | 1,20 | up   |
| 6643827 | 7355302 | 1758273 | FAST kinase domains 2                    | Fastkd2 | 301463 | 1,51 | down |
| 6741960 | 7355302 | 1758268 | FAST kinase domains 2                    | Fastkd2 | 301463 | 1,09 | up   |
| 5714753 | 7183927 | 1335497 | F-box and WD repeat domain containing 9  | Fbxw9   | 288921 | 1,08 | down |
| 5750361 | 7183927 | 1335501 | F-box and WD repeat domain containing 9  | Fbxw9   | 288921 | 1,25 | up   |
| 5762312 | 7183927 | 1335500 | F-box and WD repeat domain containing 9  | Fbxw9   | 288921 | 1,19 | up   |
| 5862876 | 7183927 | 1335499 | F-box and WD repeat domain containing 9  | Fbxw9   | 288921 | 1,25 | up   |
| 5905806 | 7183927 | 1335498 | F-box and WD repeat domain containing 9  | Fbxw9   | 288921 | 1,18 | up   |
| 6039125 | 7183927 | 1335499 | F-box and WD repeat domain containing 9  | Fbxw9   | 288921 | 1,54 | down |
| 6082430 | 7183927 | 1335505 | F-box and WD repeat domain containing 9  | Fbxw9   | 288921 | 1,38 | up   |

|         |         |         |                                         |        |        |      |      |
|---------|---------|---------|-----------------------------------------|--------|--------|------|------|
| 6132313 | 7183927 | 1335498 | F-box and WD repeat domain containing 9 | Fbxw9  | 288921 | 2,19 | up   |
| 6162667 | 7183927 | 1335497 | F-box and WD repeat domain containing 9 | Fbxw9  | 288921 | 1,06 | down |
| 6176820 | 7183927 | 1335499 | F-box and WD repeat domain containing 9 | Fbxw9  | 288921 | 1,13 | up   |
| 6237771 | 7183927 | 1335497 | F-box and WD repeat domain containing 9 | Fbxw9  | 288921 | 1,23 | down |
| 6267986 | 7183927 | 1335497 | F-box and WD repeat domain containing 9 | Fbxw9  | 288921 | 1,09 | down |
| 6495839 | 7183927 | 1335497 | F-box and WD repeat domain containing 9 | Fbxw9  | 288921 | 1,08 | down |
| 6619010 | 7183927 | 1335501 | F-box and WD repeat domain containing 9 | Fbxw9  | 288921 | 1,48 | up   |
| 6667295 | 7183927 | 1335498 | F-box and WD repeat domain containing 9 | Fbxw9  | 288921 | 1,06 | down |
| 5702120 | 7159642 | 1274202 | F-box only protein 18                   | Fbxo18 | 291293 | 1,04 | down |
| 5751402 | 7159642 | 1274215 | F-box only protein 18                   | Fbxo18 | 291293 | 1,03 | down |
| 5777366 | 7159642 | 1274205 | F-box only protein 18                   | Fbxo18 | 291293 | 1,58 | up   |
| 5787879 | 7159642 | 1274212 | F-box only protein 18                   | Fbxo18 | 291293 | 1,14 | up   |
| 5853942 | 7159642 | 1274210 | F-box only protein 18                   | Fbxo18 | 291293 | 1,33 | down |
| 5916541 | 7159642 | 1274217 | F-box only protein 18                   | Fbxo18 | 291293 | 1,11 | down |
| 5918986 | 7159642 | 1274209 | F-box only protein 18                   | Fbxo18 | 291293 | 1,33 | down |
| 5927480 | 7159642 | 1274206 | F-box only protein 18                   | Fbxo18 | 291293 | 1,06 | down |
| 6003492 | 7159642 | 1274220 | F-box only protein 18                   | Fbxo18 | 291293 | 1,32 | up   |
| 6029410 | 7159642 | 1274204 | F-box only protein 18                   | Fbxo18 | 291293 | 1,17 | up   |
| 6037324 | 7159642 | 1274216 | F-box only protein 18                   | Fbxo18 | 291293 | 1,02 | down |
| 6188336 | 7159642 | 1274219 | F-box only protein 18                   | Fbxo18 | 291293 | 1,05 | down |
| 6240500 | 7159642 | 1274209 | F-box only protein 18                   | Fbxo18 | 291293 | 1,04 | up   |
| 6250965 | 7159642 | 1274221 | F-box only protein 18                   | Fbxo18 | 291293 | 1,37 | down |
| 6252752 | 7159642 | 1274214 | F-box only protein 18                   | Fbxo18 | 291293 | 1,16 | down |
| 6287029 | 7159642 | 1274211 | F-box only protein 18                   | Fbxo18 | 291293 | 1,18 | up   |
| 6325342 | 7159642 | 1274207 | F-box only protein 18                   | Fbxo18 | 291293 | 1,05 | down |
| 6374732 | 7159642 | 1274221 | F-box only protein 18                   | Fbxo18 | 291293 | 1,29 | down |
| 6376173 | 7159642 | 1274213 | F-box only protein 18                   | Fbxo18 | 291293 | 1,32 | up   |
| 6471742 | 7159642 | 1274217 | F-box only protein 18                   | Fbxo18 | 291293 | 1,25 | up   |
| 6544638 | 7159642 | 1274218 | F-box only protein 18                   | Fbxo18 | 291293 | 1,01 | down |
| 6625329 | 7159642 | 1274198 | F-box only protein 18                   | Fbxo18 | 291293 | 1,09 | down |
| 6635452 | 7159642 | 1274220 | F-box only protein 18                   | Fbxo18 | 291293 | 1,25 | up   |
| 6644079 | 7159642 | 1274203 | F-box only protein 18                   | Fbxo18 | 291293 | 1,16 | up   |
| 6731222 | 7159642 | 1274201 | F-box only protein 18                   | Fbxo18 | 291293 | 1,00 | up   |
| 5716106 | 7132790 | 1208232 | F-box protein 16                        | Fbxo16 | 305970 | 1,54 | up   |
| 5733378 | 7132790 | 1208237 | F-box protein 16                        | Fbxo16 | 305970 | 1,34 | up   |
| 5841681 | 7132790 | 1208231 | F-box protein 16                        | Fbxo16 | 305970 | 1,26 | up   |
| 5901369 | 7132790 | 1208235 | F-box protein 16                        | Fbxo16 | 305970 | 1,11 | up   |
| 5909002 | 7132790 | 1208237 | F-box protein 16                        | Fbxo16 | 305970 | 1,15 | down |
| 6036784 | 7132790 | 1208233 | F-box protein 16                        | Fbxo16 | 305970 | 2,89 | down |
| 6044909 | 7132790 | 1208236 | F-box protein 16                        | Fbxo16 | 305970 | 1,35 | up   |
| 6353986 | 7132790 | 1208230 | F-box protein 16                        | Fbxo16 | 305970 | 1,20 | up   |
| 6499768 | 7132790 | 1208231 | F-box protein 16                        | Fbxo16 | 305970 | 1,06 | down |
| 6607310 | 7132790 | 1208234 | F-box protein 16                        | Fbxo16 | 305970 | 1,52 | up   |
| 6694228 | 7132790 | 1208234 | F-box protein 16                        | Fbxo16 | 305970 | 1,03 | down |
| 6710499 | 7132790 | 1208234 | F-box protein 16                        | Fbxo16 | 305970 | 1,12 | down |
| 5618422 | 7102708 | 1134310 | F-box protein 21                        | Fbxo21 | 360818 | 1,74 | up   |
| 5646560 | 7102708 | 1134304 | F-box protein 21                        | Fbxo21 | 360818 | 1,15 | down |
| 5707727 | 7102708 | 1134322 | F-box protein 21                        | Fbxo21 | 360818 | 1,70 | up   |
| 5884052 | 7102708 | 1134312 | F-box protein 21                        | Fbxo21 | 360818 | 1,36 | up   |
| 5968091 | 7102708 | 1134318 | F-box protein 21                        | Fbxo21 | 360818 | 1,07 | up   |
| 5998686 | 7102708 | 1134305 | F-box protein 21                        | Fbxo21 | 360818 | 1,00 | up   |
| 6024880 | 7102708 | 1134304 | F-box protein 21                        | Fbxo21 | 360818 | 1,06 | down |
| 6047440 | 7102708 | 1134322 | F-box protein 21                        | Fbxo21 | 360818 | 1,07 | down |
| 6052289 | 7102708 | 1134311 | F-box protein 21                        | Fbxo21 | 360818 | 1,14 | down |
| 6204802 | 7102708 | 1134315 | F-box protein 21                        | Fbxo21 | 360818 | 1,11 | down |
| 6279842 | 7102708 | 1134321 | F-box protein 21                        | Fbxo21 | 360818 | 1,28 | down |

|         |         |         |                  |        |        |      |      |
|---------|---------|---------|------------------|--------|--------|------|------|
| 6285918 | 7102708 | 1134314 | F-box protein 21 | Fbxo21 | 360818 | 1,23 | up   |
| 6323697 | 7102708 | 1134320 | F-box protein 21 | Fbxo21 | 360818 | 1,13 | up   |
| 6502145 | 7102708 | 1134308 | F-box protein 21 | Fbxo21 | 360818 | 1,20 | down |
| 6603211 | 7102708 | 1134307 | F-box protein 21 | Fbxo21 | 360818 | 1,05 | down |
| 5629636 | 7024951 | 948245  | F-box protein 30 | Fbxo30 | 308283 | 1,18 | up   |
| 5967843 | 7024951 | 948244  | F-box protein 30 | Fbxo30 | 308283 | 2,57 | down |
| 6153402 | 7024951 | 948247  | F-box protein 30 | Fbxo30 | 308283 | 1,19 | down |
| 6635956 | 7024951 | 948246  | F-box protein 30 | Fbxo30 | 308283 | 1,22 | up   |
| 5643441 | 7176409 | 1315681 | F-box protein 38 | Fbxo38 | 307390 | 1,15 | down |
| 5731153 | 7176409 | 1315685 | F-box protein 38 | Fbxo38 | 307390 | 1,11 | down |
| 5733765 | 7176409 | 1315672 | F-box protein 38 | Fbxo38 | 307390 | 1,37 | down |
| 5747230 | 7176409 | 1315693 | F-box protein 38 | Fbxo38 | 307390 | 2,11 | up   |
| 5799231 | 7176409 | 1315678 | F-box protein 38 | Fbxo38 | 307390 | 1,02 | down |
| 5820820 | 7176409 | 1315687 | F-box protein 38 | Fbxo38 | 307390 | 1,17 | down |
| 5839133 | 7176409 | 1315670 | F-box protein 38 | Fbxo38 | 307390 | 1,03 | down |
| 5890411 | 7176409 | 1315682 | F-box protein 38 | Fbxo38 | 307390 | 1,02 | up   |
| 5891516 | 7176409 | 1315668 | F-box protein 38 | Fbxo38 | 307390 | 1,53 | up   |
| 5952592 | 7176409 | 1315690 | F-box protein 38 | Fbxo38 | 307390 | 1,19 | up   |
| 6006804 | 7176409 | 1315674 | F-box protein 38 | Fbxo38 | 307390 | 1,04 | down |
| 6102822 | 7176409 | 1315686 | F-box protein 38 | Fbxo38 | 307390 | 1,13 | up   |
| 6203039 | 7176409 | 1315688 | F-box protein 38 | Fbxo38 | 307390 | 1,06 | down |
| 6285085 | 7176409 | 1315684 | F-box protein 38 | Fbxo38 | 307390 | 1,02 | down |
| 6370146 | 7176409 | 1315691 | F-box protein 38 | Fbxo38 | 307390 | 1,55 | down |
| 6371581 | 7176409 | 1315680 | F-box protein 38 | Fbxo38 | 307390 | 1,36 | up   |
| 6418362 | 7176409 | 1315668 | F-box protein 38 | Fbxo38 | 307390 | 1,07 | down |
| 6465880 | 7176409 | 1315679 | F-box protein 38 | Fbxo38 | 307390 | 1,24 | down |
| 6469431 | 7176409 | 1315689 | F-box protein 38 | Fbxo38 | 307390 | 1,34 | up   |
| 6488043 | 7176409 | 1315671 | F-box protein 38 | Fbxo38 | 307390 | 1,30 | up   |
| 6551879 | 7176409 | 1315669 | F-box protein 38 | Fbxo38 | 307390 | 1,37 | up   |
| 6553004 | 7176409 | 1315683 | F-box protein 38 | Fbxo38 | 307390 | 1,03 | down |
| 6567821 | 7176409 | 1315673 | F-box protein 38 | Fbxo38 | 307390 | 1,13 | down |
| 6575680 | 7176409 | 1315677 | F-box protein 38 | Fbxo38 | 307390 | 1,05 | down |
| 6715225 | 7176409 | 1315677 | F-box protein 38 | Fbxo38 | 307390 | 1,08 | up   |
| 5661948 | 7293049 | 1603886 | F-box protein 44 | Fbxo44 | 500587 | 1,14 | up   |
| 6078752 | 7293049 | 1603885 | F-box protein 44 | Fbxo44 | 500587 | 1,13 | up   |
| 6273335 | 7293049 | 1603885 | F-box protein 44 | Fbxo44 | 500587 | 1,04 | down |
| 6273668 | 7293049 | 1603887 | F-box protein 44 | Fbxo44 | 500587 | 1,00 | up   |
| 6362661 | 7293049 | 1603883 | F-box protein 44 | Fbxo44 | 500587 | 1,05 | down |
| 6452946 | 7293049 | 1603878 | F-box protein 44 | Fbxo44 | 500587 | 1,11 | down |
| 6453393 | 7293049 | 1603884 | F-box protein 44 | Fbxo44 | 500587 | 1,25 | down |
| 6504983 | 7293049 | 1603878 | F-box protein 44 | Fbxo44 | 500587 | 2,48 | down |
| 5689589 | 7323057 | 1678760 | F-box protein 7  | Fbxo7  | 366854 | 2,02 | down |
| 5690124 | 7323057 | 1678752 | F-box protein 7  | Fbxo7  | 366854 | 1,16 | up   |
| 5791139 | 7323057 | 1678758 | F-box protein 7  | Fbxo7  | 366854 | 1,16 | up   |
| 5864210 | 7323057 | 1678752 | F-box protein 7  | Fbxo7  | 366854 | 1,20 | down |
| 5906818 | 7323057 | 1678752 | F-box protein 7  | Fbxo7  | 366854 | 1,22 | down |
| 5980187 | 7323057 | 1678759 | F-box protein 7  | Fbxo7  | 366854 | 1,24 | up   |
| 5999359 | 7323057 | 1678752 | F-box protein 7  | Fbxo7  | 366854 | 1,43 | down |
| 6008588 | 7323057 | 1678757 | F-box protein 7  | Fbxo7  | 366854 | 1,18 | up   |
| 6052354 | 7323057 | 1678752 | F-box protein 7  | Fbxo7  | 366854 | 1,22 | up   |
| 6075152 | 7323057 | 1678754 | F-box protein 7  | Fbxo7  | 366854 | 1,25 | up   |
| 6196362 | 7323057 | 1678751 | F-box protein 7  | Fbxo7  | 366854 | 1,36 | down |
| 6229576 | 7323057 | 1678753 | F-box protein 7  | Fbxo7  | 366854 | 1,04 | up   |
| 6467229 | 7323057 | 1678756 | F-box protein 7  | Fbxo7  | 366854 | 1,03 | down |
| 6604576 | 7323057 | 1678751 | F-box protein 7  | Fbxo7  | 366854 | 1,89 | down |
| 6742076 | 7323057 | 1678755 | F-box protein 7  | Fbxo7  | 366854 | 1,02 | down |

|         |         |         |                                                                             |        |        |      |      |
|---------|---------|---------|-----------------------------------------------------------------------------|--------|--------|------|------|
| 5751257 | 7050860 | 1011511 | Fc fragment of IgG, receptor, transporter, alpha                            | Fcgrt  | 29558  | 1,10 | up   |
| 5834186 | 7050860 | 1011510 | Fc fragment of IgG, receptor, transporter, alpha                            | Fcgrt  | 29558  | 1,61 | up   |
| 5850064 | 7050860 | 1011510 | Fc fragment of IgG, receptor, transporter, alpha                            | Fcgrt  | 29558  | 2,36 | down |
| 5923580 | 7050860 | 1011515 | Fc fragment of IgG, receptor, transporter, alpha                            | Fcgrt  | 29558  | 1,04 | down |
| 6005477 | 7050860 | 1011516 | Fc fragment of IgG, receptor, transporter, alpha                            | Fcgrt  | 29558  | 1,32 | up   |
| 6107451 | 7050860 | 1011510 | Fc fragment of IgG, receptor, transporter, alpha                            | Fcgrt  | 29558  | 1,84 | up   |
| 6220167 | 7050860 | 1011514 | Fc fragment of IgG, receptor, transporter, alpha                            | Fcgrt  | 29558  | 1,10 | down |
| 6293105 | 7050860 | 1011514 | Fc fragment of IgG, receptor, transporter, alpha                            | Fcgrt  | 29558  | 1,06 | down |
| 6320207 | 7050860 | 1011513 | Fc fragment of IgG, receptor, transporter, alpha                            | Fcgrt  | 29558  | 1,25 | up   |
| 6449855 | 7050860 | 1011510 | Fc fragment of IgG, receptor, transporter, alpha                            | Fcgrt  | 29558  | 1,10 | down |
| 6527931 | 7050860 | 1011516 | Fc fragment of IgG, receptor, transporter, alpha                            | Fcgrt  | 29558  | 1,14 | down |
| 6689641 | 7050860 | 1011512 | Fc fragment of IgG, receptor, transporter, alpha                            | Fcgrt  | 29558  | 1,00 | up   |
| 6494158 | 7195903 | 1365335 | Fc receptor-like 1                                                          | Fcrl1  | 680665 | 1,10 | down |
| 5698743 | 7300314 | 1622458 | feline leukemia virus subgroup C cellular receptor family, member 2         | Flvcr2 | 314323 | 1,09 | up   |
| 5711616 | 7300314 | 1622462 | feline leukemia virus subgroup C cellular receptor family, member 2         | Flvcr2 | 314323 | 2,14 | down |
| 5934767 | 7300314 | 1622455 | feline leukemia virus subgroup C cellular receptor family, member 2         | Flvcr2 | 314323 | 1,85 | up   |
| 5994361 | 7300314 | 1622457 | feline leukemia virus subgroup C cellular receptor family, member 2         | Flvcr2 | 314323 | 1,32 | up   |
| 6126805 | 7300314 | 1622460 | feline leukemia virus subgroup C cellular receptor family, member 2         | Flvcr2 | 314323 | 1,24 | down |
| 6283911 | 7300314 | 1622461 | feline leukemia virus subgroup C cellular receptor family, member 2         | Flvcr2 | 314323 | 1,66 | up   |
| 6556202 | 7300314 | 1622456 | feline leukemia virus subgroup C cellular receptor family, member 2         | Flvcr2 | 314323 | 1,42 | down |
| 6729872 | 7300314 | 1622459 | feline leukemia virus subgroup C cellular receptor family, member 2         | Flvcr2 | 314323 | 1,18 | up   |
| 6492331 | 7142693 | 1232474 | FERM, RhoGEF (Arhgef) and pleckstrin domain protein 1 (chondrocyte-derived) | Farp1  | 306183 | 1,69 | up   |
| 5650407 | 7034777 | 973311  | FGF receptor activating protein 1                                           | Frag1  | 116675 | 1,04 | down |
| 5742316 | 7034777 | 973306  | FGF receptor activating protein 1                                           | Frag1  | 116675 | 1,01 | up   |
| 5810211 | 7034777 | 973304  | FGF receptor activating protein 1                                           | Frag1  | 116675 | 1,48 | up   |
| 5868058 | 7034777 | 973304  | FGF receptor activating protein 1                                           | Frag1  | 116675 | 1,17 | up   |
| 5939105 | 7034777 | 973309  | FGF receptor activating protein 1                                           | Frag1  | 116675 | 1,22 | down |
| 6167819 | 7034777 | 973305  | FGF receptor activating protein 1                                           | Frag1  | 116675 | 2,37 | down |
| 6202503 | 7034777 | 973308  | FGF receptor activating protein 1                                           | Frag1  | 116675 | 1,46 | up   |
| 6443275 | 7034777 | 973307  | FGF receptor activating protein 1                                           | Frag1  | 116675 | 1,26 | up   |
| 6648945 | 7034777 | 973310  | FGF receptor activating protein 1                                           | Frag1  | 116675 | 1,26 | up   |
| 5675470 | 7277379 | 1565979 | FGGY carbohydrate kinase domain containing                                  | Fggy   | 298250 | 1,20 | down |
| 5810507 | 7277379 | 1565972 | FGGY carbohydrate kinase domain containing                                  | Fggy   | 298250 | 1,00 | up   |
| 5824217 | 7277379 | 1565975 | FGGY carbohydrate kinase domain containing                                  | Fggy   | 298250 | 2,03 | down |
| 5827991 | 7277379 | 1565971 | FGGY carbohydrate kinase domain containing                                  | Fggy   | 298250 | 1,29 | up   |
| 5901849 | 7277379 | 1565981 | FGGY carbohydrate kinase domain containing                                  | Fggy   | 298250 | 1,14 | up   |
| 5961908 | 7277379 | 1565973 | FGGY carbohydrate kinase domain containing                                  | Fggy   | 298250 | 1,09 | up   |
| 6015225 | 7277379 | 1565976 | FGGY carbohydrate kinase domain containing                                  | Fggy   | 298250 | 1,25 | up   |
| 6063838 | 7277379 | 1565982 | FGGY carbohydrate kinase domain containing                                  | Fggy   | 298250 | 1,05 | up   |
| 6104101 | 7277379 | 1565972 | FGGY carbohydrate kinase domain containing                                  | Fggy   | 298250 | 1,31 | up   |
| 6115849 | 7277379 | 1565977 | FGGY carbohydrate kinase domain containing                                  | Fggy   | 298250 | 1,10 | up   |
| 6265857 | 7277379 | 1565974 | FGGY carbohydrate kinase domain containing                                  | Fggy   | 298250 | 1,02 | down |
| 6284050 | 7277379 | 1565978 | FGGY carbohydrate kinase domain containing                                  | Fggy   | 298250 | 1,16 | down |
| 6313595 | 7277379 | 1565969 | FGGY carbohydrate kinase domain containing                                  | Fggy   | 298250 | 1,37 | down |
| 6469359 | 7277379 | 1565980 | FGGY carbohydrate kinase domain containing                                  | Fggy   | 298250 | 1,01 | down |
| 6539393 | 7277379 | 1565970 | FGGY carbohydrate kinase domain containing                                  | Fggy   | 298250 | 1,25 | up   |
| 6572684 | 7277379 | 1565983 | FGGY carbohydrate kinase domain containing                                  | Fggy   | 298250 | 1,27 | down |
| 5633975 | 7244261 | 1483880 | fibrillin 1                                                                 | Fbn1   | 83727  | 1,09 | down |
| 5644984 | 7244261 | 1483888 | fibrillin 1                                                                 | Fbn1   | 83727  | 1,05 | up   |
| 5669979 | 7244261 | 1483909 | fibrillin 1                                                                 | Fbn1   | 83727  | 1,20 | down |
| 5672154 | 7244261 | 1483895 | fibrillin 1                                                                 | Fbn1   | 83727  | 1,02 | up   |
| 5684634 | 7244261 | 1483936 | fibrillin 1                                                                 | Fbn1   | 83727  | 1,07 | up   |
| 5706076 | 7244261 | 1483933 | fibrillin 1                                                                 | Fbn1   | 83727  | 1,35 | down |
| 5712054 | 7244261 | 1483928 | fibrillin 1                                                                 | Fbn1   | 83727  | 1,15 | up   |
| 5716124 | 7244261 | 1483914 | fibrillin 1                                                                 | Fbn1   | 83727  | 1,14 | down |
| 5752492 | 7244261 | 1483927 | fibrillin 1                                                                 | Fbn1   | 83727  | 1,17 | up   |

|         |         |         |             |      |       |      |      |
|---------|---------|---------|-------------|------|-------|------|------|
| 5756873 | 7244261 | 1483907 | fibrillin 1 | Fbn1 | 83727 | 1,19 | up   |
| 5757979 | 7244261 | 1483897 | fibrillin 1 | Fbn1 | 83727 | 1,22 | up   |
| 5769700 | 7244261 | 1483886 | fibrillin 1 | Fbn1 | 83727 | 1,46 | down |
| 5790881 | 7244261 | 1483892 | fibrillin 1 | Fbn1 | 83727 | 1,04 | up   |
| 5793894 | 7244261 | 1483938 | fibrillin 1 | Fbn1 | 83727 | 1,18 | down |
| 5797145 | 7244261 | 1483934 | fibrillin 1 | Fbn1 | 83727 | 1,65 | down |
| 5840254 | 7244261 | 1483900 | fibrillin 1 | Fbn1 | 83727 | 1,03 | down |
| 5841623 | 7244261 | 1483890 | fibrillin 1 | Fbn1 | 83727 | 1,17 | up   |
| 5874657 | 7244261 | 1483903 | fibrillin 1 | Fbn1 | 83727 | 1,40 | up   |
| 5886164 | 7244261 | 1483919 | fibrillin 1 | Fbn1 | 83727 | 1,13 | down |
| 5888605 | 7244261 | 1483894 | fibrillin 1 | Fbn1 | 83727 | 1,25 | up   |
| 5904024 | 7244261 | 1483926 | fibrillin 1 | Fbn1 | 83727 | 1,12 | down |
| 5951568 | 7244261 | 1483882 | fibrillin 1 | Fbn1 | 83727 | 1,14 | up   |
| 5967156 | 7244261 | 1483918 | fibrillin 1 | Fbn1 | 83727 | 1,07 | down |
| 5967433 | 7244261 | 1483937 | fibrillin 1 | Fbn1 | 83727 | 1,04 | up   |
| 5981852 | 7244261 | 1483877 | fibrillin 1 | Fbn1 | 83727 | 2,14 | up   |
| 5989519 | 7244261 | 1483916 | fibrillin 1 | Fbn1 | 83727 | 1,27 | up   |
| 6005053 | 7244261 | 1483940 | fibrillin 1 | Fbn1 | 83727 | 1,49 | up   |
| 6014586 | 7244261 | 1483879 | fibrillin 1 | Fbn1 | 83727 | 1,21 | up   |
| 6061950 | 7244261 | 1483922 | fibrillin 1 | Fbn1 | 83727 | 1,14 | up   |
| 6066496 | 7244261 | 1483887 | fibrillin 1 | Fbn1 | 83727 | 1,15 | down |
| 6111166 | 7244261 | 1483941 | fibrillin 1 | Fbn1 | 83727 | 1,47 | up   |
| 6173880 | 7244261 | 1483893 | fibrillin 1 | Fbn1 | 83727 | 1,41 | up   |
| 6204635 | 7244261 | 1483920 | fibrillin 1 | Fbn1 | 83727 | 1,10 | up   |
| 6229623 | 7244261 | 1483912 | fibrillin 1 | Fbn1 | 83727 | 1,34 | down |
| 6244031 | 7244261 | 1483931 | fibrillin 1 | Fbn1 | 83727 | 2,02 | up   |
| 6246793 | 7244261 | 1483913 | fibrillin 1 | Fbn1 | 83727 | 1,03 | down |
| 6248859 | 7244261 | 1483908 | fibrillin 1 | Fbn1 | 83727 | 1,38 | up   |
| 6279090 | 7244261 | 1483921 | fibrillin 1 | Fbn1 | 83727 | 1,01 | down |
| 6306939 | 7244261 | 1483902 | fibrillin 1 | Fbn1 | 83727 | 1,02 | up   |
| 6383990 | 7244261 | 1483906 | fibrillin 1 | Fbn1 | 83727 | 1,00 | up   |
| 6387731 | 7244261 | 1483878 | fibrillin 1 | Fbn1 | 83727 | 1,05 | down |
| 6388820 | 7244261 | 1483889 | fibrillin 1 | Fbn1 | 83727 | 1,23 | up   |
| 6396248 | 7244261 | 1483899 | fibrillin 1 | Fbn1 | 83727 | 1,08 | up   |
| 6396979 | 7244261 | 1483896 | fibrillin 1 | Fbn1 | 83727 | 1,03 | up   |
| 6446403 | 7244261 | 1483883 | fibrillin 1 | Fbn1 | 83727 | 1,01 | up   |
| 6462571 | 7244261 | 1483935 | fibrillin 1 | Fbn1 | 83727 | 1,02 | up   |
| 6475813 | 7244261 | 1483885 | fibrillin 1 | Fbn1 | 83727 | 1,21 | down |
| 6480976 | 7244261 | 1483904 | fibrillin 1 | Fbn1 | 83727 | 1,43 | down |
| 6484344 | 7244261 | 1483924 | fibrillin 1 | Fbn1 | 83727 | 1,23 | down |
| 6544685 | 7244261 | 1483910 | fibrillin 1 | Fbn1 | 83727 | 1,13 | down |
| 6560124 | 7244261 | 1483936 | fibrillin 1 | Fbn1 | 83727 | 1,24 | up   |
| 6580712 | 7244261 | 1483891 | fibrillin 1 | Fbn1 | 83727 | 1,13 | up   |
| 6593078 | 7244261 | 1483884 | fibrillin 1 | Fbn1 | 83727 | 1,31 | down |
| 6599821 | 7244261 | 1483901 | fibrillin 1 | Fbn1 | 83727 | 1,25 | down |
| 6629572 | 7244261 | 1483923 | fibrillin 1 | Fbn1 | 83727 | 1,28 | up   |
| 6636476 | 7244261 | 1483879 | fibrillin 1 | Fbn1 | 83727 | 1,03 | down |
| 6649081 | 7244261 | 1483917 | fibrillin 1 | Fbn1 | 83727 | 1,98 | up   |
| 6670803 | 7244261 | 1483929 | fibrillin 1 | Fbn1 | 83727 | 1,07 | up   |
| 6671966 | 7244261 | 1483936 | fibrillin 1 | Fbn1 | 83727 | 1,38 | down |
| 6680521 | 7244261 | 1483939 | fibrillin 1 | Fbn1 | 83727 | 1,00 | up   |
| 6706405 | 7244261 | 1483905 | fibrillin 1 | Fbn1 | 83727 | 1,77 | down |
| 6708953 | 7244261 | 1483930 | fibrillin 1 | Fbn1 | 83727 | 1,22 | up   |
| 6711486 | 7244261 | 1483925 | fibrillin 1 | Fbn1 | 83727 | 1,05 | down |
| 6728155 | 7244261 | 1483915 | fibrillin 1 | Fbn1 | 83727 | 1,03 | up   |
| 6728660 | 7244261 | 1483932 | fibrillin 1 | Fbn1 | 83727 | 1,25 | up   |

|         |         |         |                                     |       |       |      |      |
|---------|---------|---------|-------------------------------------|-------|-------|------|------|
| 6736320 | 7244261 | 1483911 | fibrillin 1                         | Fbn1  | 83727 | 1,68 | up   |
| 6746450 | 7244261 | 1483881 | fibrillin 1                         | Fbn1  | 83727 | 1,01 | down |
| 5680549 | 7195514 | 1364485 | fibrinogen gamma chain              | Fgg   | 24367 | 1,08 | up   |
| 5724161 | 7195514 | 1364484 | fibrinogen gamma chain              | Fgg   | 24367 | 1,05 | down |
| 5752346 | 7195514 | 1364490 | fibrinogen gamma chain              | Fgg   | 24367 | 1,08 | down |
| 5752864 | 7195514 | 1364487 | fibrinogen gamma chain              | Fgg   | 24367 | 1,07 | down |
| 5854113 | 7195514 | 1364484 | fibrinogen gamma chain              | Fgg   | 24367 | 1,19 | down |
| 6102456 | 7195514 | 1364491 | fibrinogen gamma chain              | Fgg   | 24367 | 2,43 | down |
| 6130173 | 7195514 | 1364488 | fibrinogen gamma chain              | Fgg   | 24367 | 1,40 | up   |
| 6447096 | 7195514 | 1364482 | fibrinogen gamma chain              | Fgg   | 24367 | 1,03 | down |
| 6651331 | 7195514 | 1364489 | fibrinogen gamma chain              | Fgg   | 24367 | 1,37 | up   |
| 6677531 | 7195514 | 1364486 | fibrinogen gamma chain              | Fgg   | 24367 | 1,16 | down |
| 6736930 | 7195514 | 1364483 | fibrinogen gamma chain              | Fgg   | 24367 | 1,00 | up   |
| 5638761 | 7146015 | 1240680 | fibroblast growth factor 20         | Fgf20 | 66017 | 1,25 | down |
| 5767166 | 7146015 | 1240678 | fibroblast growth factor 20         | Fgf20 | 66017 | 1,34 | down |
| 5957574 | 7146015 | 1240678 | fibroblast growth factor 20         | Fgf20 | 66017 | 1,66 | up   |
| 5974810 | 7146015 | 1240679 | fibroblast growth factor 20         | Fgf20 | 66017 | 1,19 | down |
| 6470893 | 7146015 | 1240678 | fibroblast growth factor 20         | Fgf20 | 66017 | 2,14 | up   |
| 5647881 | 7127377 | 1195008 | fibroblast growth factor receptor 3 | Fgfr3 | 84489 | 1,37 | up   |
| 5657575 | 7127377 | 1195004 | fibroblast growth factor receptor 3 | Fgfr3 | 84489 | 1,01 | down |
| 5806972 | 7127377 | 1195006 | fibroblast growth factor receptor 3 | Fgfr3 | 84489 | 1,08 | up   |
| 5816307 | 7127377 | 1195019 | fibroblast growth factor receptor 3 | Fgfr3 | 84489 | 1,44 | down |
| 5915576 | 7127377 | 1195014 | fibroblast growth factor receptor 3 | Fgfr3 | 84489 | 2,90 | down |
| 5994185 | 7127377 | 1195009 | fibroblast growth factor receptor 3 | Fgfr3 | 84489 | 1,48 | up   |
| 6004282 | 7127377 | 1195013 | fibroblast growth factor receptor 3 | Fgfr3 | 84489 | 1,13 | up   |
| 6028796 | 7127377 | 1195003 | fibroblast growth factor receptor 3 | Fgfr3 | 84489 | 1,48 | up   |
| 6217557 | 7127377 | 1195011 | fibroblast growth factor receptor 3 | Fgfr3 | 84489 | 1,00 | up   |
| 6228498 | 7127377 | 1195018 | fibroblast growth factor receptor 3 | Fgfr3 | 84489 | 1,10 | up   |
| 6259110 | 7127377 | 1195017 | fibroblast growth factor receptor 3 | Fgfr3 | 84489 | 1,32 | down |
| 6396009 | 7127377 | 1195012 | fibroblast growth factor receptor 3 | Fgfr3 | 84489 | 1,37 | up   |
| 6406118 | 7127377 | 1195015 | fibroblast growth factor receptor 3 | Fgfr3 | 84489 | 1,00 | up   |
| 6409494 | 7127377 | 1195010 | fibroblast growth factor receptor 3 | Fgfr3 | 84489 | 1,18 | up   |
| 6482448 | 7127377 | 1195016 | fibroblast growth factor receptor 3 | Fgfr3 | 84489 | 1,61 | down |
| 6492669 | 7127377 | 1195007 | fibroblast growth factor receptor 3 | Fgfr3 | 84489 | 1,63 | down |
| 6714671 | 7127377 | 1195005 | fibroblast growth factor receptor 3 | Fgfr3 | 84489 | 1,61 | down |
| 6745569 | 7127377 | 1195011 | fibroblast growth factor receptor 3 | Fgfr3 | 84489 | 1,39 | up   |
| 5626556 | 7363541 | 1778043 | fibronectin 1                       | Fn1   | 25661 | 1,10 | up   |
| 5631376 | 7363541 | 1778016 | fibronectin 1                       | Fn1   | 25661 | 1,06 | up   |
| 5635547 | 7363541 | 1778029 | fibronectin 1                       | Fn1   | 25661 | 1,12 | down |
| 5652686 | 7363541 | 1778000 | fibronectin 1                       | Fn1   | 25661 | 1,01 | up   |
| 5654017 | 7363541 | 1778011 | fibronectin 1                       | Fn1   | 25661 | 1,33 | up   |
| 5665659 | 7363541 | 1778023 | fibronectin 1                       | Fn1   | 25661 | 1,06 | up   |
| 5678244 | 7363541 | 1778024 | fibronectin 1                       | Fn1   | 25661 | 1,08 | up   |
| 5679508 | 7363541 | 1778019 | fibronectin 1                       | Fn1   | 25661 | 1,02 | down |
| 5686173 | 7363541 | 1778033 | fibronectin 1                       | Fn1   | 25661 | 1,06 | down |
| 5687085 | 7363541 | 1778022 | fibronectin 1                       | Fn1   | 25661 | 1,17 | up   |
| 5690501 | 7363541 | 1778004 | fibronectin 1                       | Fn1   | 25661 | 1,09 | down |
| 5726812 | 7363541 | 1778041 | fibronectin 1                       | Fn1   | 25661 | 1,30 | up   |
| 5741347 | 7363541 | 1778000 | fibronectin 1                       | Fn1   | 25661 | 1,60 | up   |
| 5742121 | 7363541 | 1778040 | fibronectin 1                       | Fn1   | 25661 | 1,06 | up   |
| 5765379 | 7363541 | 1778006 | fibronectin 1                       | Fn1   | 25661 | 1,11 | down |
| 5770566 | 7363541 | 1778026 | fibronectin 1                       | Fn1   | 25661 | 1,05 | up   |
| 5775595 | 7363541 | 1778034 | fibronectin 1                       | Fn1   | 25661 | 1,18 | up   |
| 5856947 | 7363541 | 1778012 | fibronectin 1                       | Fn1   | 25661 | 1,10 | up   |
| 5899407 | 7363541 | 1778020 | fibronectin 1                       | Fn1   | 25661 | 1,10 | up   |
| 5910280 | 7363541 | 1778000 | fibronectin 1                       | Fn1   | 25661 | 1,86 | up   |



|         |         |         |                                                   |       |        |      |      |
|---------|---------|---------|---------------------------------------------------|-------|--------|------|------|
| 5958877 | 7363541 | 1778014 | fibronectin 1                                     | Fn1   | 25661  | 1,05 | up   |
| 5963523 | 7363541 | 1778046 | fibronectin 1                                     | Fn1   | 25661  | 3,89 | up   |
| 5988126 | 7363541 | 1778046 | fibronectin 1                                     | Fn1   | 25661  | 1,94 | up   |
| 6003922 | 7363541 | 1778003 | fibronectin 1                                     | Fn1   | 25661  | 1,37 | up   |
| 6063858 | 7363541 | 1778025 | fibronectin 1                                     | Fn1   | 25661  | 1,04 | down |
| 6142821 | 7363541 | 1778007 | fibronectin 1                                     | Fn1   | 25661  | 1,46 | up   |
| 6162019 | 7363541 | 1778021 | fibronectin 1                                     | Fn1   | 25661  | 1,09 | down |
| 6205584 | 7363541 | 1778007 | fibronectin 1                                     | Fn1   | 25661  | 1,29 | down |
| 6208238 | 7363541 | 1778037 | fibronectin 1                                     | Fn1   | 25661  | 1,23 | up   |
| 6234629 | 7363541 | 1778000 | fibronectin 1                                     | Fn1   | 25661  | 1,48 | up   |
| 6242113 | 7363541 | 1778039 | fibronectin 1                                     | Fn1   | 25661  | 1,06 | down |
| 6248074 | 7363541 | 1778042 | fibronectin 1                                     | Fn1   | 25661  | 1,14 | up   |
| 6266820 | 7363541 | 1778030 | fibronectin 1                                     | Fn1   | 25661  | 1,37 | down |
| 6294499 | 7363541 | 1778015 | fibronectin 1                                     | Fn1   | 25661  | 1,03 | up   |
| 6317570 | 7363541 | 1778001 | fibronectin 1                                     | Fn1   | 25661  | 1,16 | down |
| 6351661 | 7363541 | 1778027 | fibronectin 1                                     | Fn1   | 25661  | 1,26 | down |
| 6385002 | 7363541 | 1778005 | fibronectin 1                                     | Fn1   | 25661  | 1,09 | up   |
| 6418498 | 7363541 | 1778002 | fibronectin 1                                     | Fn1   | 25661  | 1,25 | up   |
| 6432577 | 7363541 | 1778038 | fibronectin 1                                     | Fn1   | 25661  | 1,65 | down |
| 6445237 | 7363541 | 1778036 | fibronectin 1                                     | Fn1   | 25661  | 1,15 | up   |
| 6457680 | 7363541 | 1778021 | fibronectin 1                                     | Fn1   | 25661  | 1,28 | down |
| 6474218 | 7363541 | 1778035 | fibronectin 1                                     | Fn1   | 25661  | 1,22 | down |
| 6491411 | 7363541 | 1778044 | fibronectin 1                                     | Fn1   | 25661  | 1,30 | down |
| 6492125 | 7363541 | 1778017 | fibronectin 1                                     | Fn1   | 25661  | 1,21 | up   |
| 6504433 | 7363541 | 1778010 | fibronectin 1                                     | Fn1   | 25661  | 1,05 | up   |
| 6514715 | 7363541 | 1778013 | fibronectin 1                                     | Fn1   | 25661  | 1,13 | down |
| 6525434 | 7363541 | 1778031 | fibronectin 1                                     | Fn1   | 25661  | 1,04 | up   |
| 6567035 | 7363541 | 1778046 | fibronectin 1                                     | Fn1   | 25661  | 2,25 | up   |
| 6593795 | 7363541 | 1778032 | fibronectin 1                                     | Fn1   | 25661  | 1,22 | down |
| 6635785 | 7363541 | 1778007 | fibronectin 1                                     | Fn1   | 25661  | 1,07 | down |
| 6659969 | 7363541 | 1778045 | fibronectin 1                                     | Fn1   | 25661  | 1,24 | down |
| 6665710 | 7363541 | 1778018 | fibronectin 1                                     | Fn1   | 25661  | 1,13 | up   |
| 6673753 | 7363541 | 1778028 | fibronectin 1                                     | Fn1   | 25661  | 1,17 | down |
| 6681721 | 7363541 | 1778009 | fibronectin 1                                     | Fn1   | 25661  | 1,06 | down |
| 6721400 | 7363541 | 1778008 | fibronectin 1                                     | Fn1   | 25661  | 1,19 | down |
| 5987696 | 7256191 | 1512877 | fibulin 2                                         | Fbln2 | 282583 | 1,00 | down |
| 6034174 | 7256191 | 1512872 | fibulin 2                                         | Fbln2 | 282583 | 1,46 | up   |
| 6297311 | 7256191 | 1512878 | fibulin 2                                         | Fbln2 | 282583 | 1,17 | up   |
| 6372869 | 7256191 | 1512871 | fibulin 2                                         | Fbln2 | 282583 | 1,20 | up   |
| 6407510 | 7256191 | 1512873 | fibulin 2                                         | Fbln2 | 282583 | 1,24 | up   |
| 6668106 | 7256191 | 1512874 | fibulin 2                                         | Fbln2 | 282583 | 1,09 | down |
| 6692175 | 7256191 | 1512871 | fibulin 2                                         | Fbln2 | 282583 | 1,24 | down |
| 5719856 | 7236875 | 1465432 | ficolin (collagen/fibrinogen domain containing) 1 | Fcn1  | 83517  | 1,02 | up   |
| 5729907 | 7236875 | 1465436 | ficolin (collagen/fibrinogen domain containing) 1 | Fcn1  | 83517  | 1,35 | up   |
| 5740607 | 7236875 | 1465442 | ficolin (collagen/fibrinogen domain containing) 1 | Fcn1  | 83517  | 2,08 | down |
| 5751126 | 7236875 | 1465438 | ficolin (collagen/fibrinogen domain containing) 1 | Fcn1  | 83517  | 1,58 | up   |
| 5751800 | 7236875 | 1465437 | ficolin (collagen/fibrinogen domain containing) 1 | Fcn1  | 83517  | 1,02 | up   |
| 5761182 | 7236875 | 1465434 | ficolin (collagen/fibrinogen domain containing) 1 | Fcn1  | 83517  | 1,07 | down |
| 6416867 | 7236875 | 1465441 | ficolin (collagen/fibrinogen domain containing) 1 | Fcn1  | 83517  | 1,04 | down |
| 6446721 | 7236875 | 1465442 | ficolin (collagen/fibrinogen domain containing) 1 | Fcn1  | 83517  | 1,01 | down |
| 6505583 | 7236875 | 1465440 | ficolin (collagen/fibrinogen domain containing) 1 | Fcn1  | 83517  | 1,22 | down |
| 6519571 | 7236875 | 1465439 | ficolin (collagen/fibrinogen domain containing) 1 | Fcn1  | 83517  | 1,78 | up   |
| 6600019 | 7236875 | 1465435 | ficolin (collagen/fibrinogen domain containing) 1 | Fcn1  | 83517  | 1,04 | up   |
| 6631156 | 7236875 | 1465433 | ficolin (collagen/fibrinogen domain containing) 1 | Fcn1  | 83517  | 1,01 | down |
| 6709011 | 7236875 | 1465442 | ficolin (collagen/fibrinogen domain containing) 1 | Fcn1  | 83517  | 1,08 | up   |
| 5639927 | 7252051 | 1502506 | filamin C, gamma (actin binding protein 280)      | Flnc  | 362332 | 1,08 | up   |

|         |         |         |                                              |      |        |      |      |
|---------|---------|---------|----------------------------------------------|------|--------|------|------|
| 5652906 | 7252051 | 1502474 | filamin C, gamma (actin binding protein 280) | Flnc | 362332 | 1,02 | up   |
| 5653626 | 7252051 | 1502496 | filamin C, gamma (actin binding protein 280) | Flnc | 362332 | 1,04 | up   |
| 5659687 | 7252051 | 1502484 | filamin C, gamma (actin binding protein 280) | Flnc | 362332 | 1,40 | up   |
| 5669123 | 7252051 | 1502528 | filamin C, gamma (actin binding protein 280) | Flnc | 362332 | 1,06 | down |
| 5686290 | 7252051 | 1502499 | filamin C, gamma (actin binding protein 280) | Flnc | 362332 | 1,14 | up   |
| 5705808 | 7252051 | 1502524 | filamin C, gamma (actin binding protein 280) | Flnc | 362332 | 1,03 | down |
| 5725844 | 7252051 | 1502500 | filamin C, gamma (actin binding protein 280) | Flnc | 362332 | 1,47 | up   |
| 5731616 | 7252051 | 1502474 | filamin C, gamma (actin binding protein 280) | Flnc | 362332 | 1,29 | up   |
| 5750947 | 7252051 | 1502487 | filamin C, gamma (actin binding protein 280) | Flnc | 362332 | 1,43 | down |
| 5755176 | 7252051 | 1502474 | filamin C, gamma (actin binding protein 280) | Flnc | 362332 | 1,02 | up   |
| 5803699 | 7252051 | 1502518 | filamin C, gamma (actin binding protein 280) | Flnc | 362332 | 1,32 | down |
| 5811158 | 7252051 | 1502521 | filamin C, gamma (actin binding protein 280) | Flnc | 362332 | 1,24 | down |
| 5818282 | 7252051 | 1502526 | filamin C, gamma (actin binding protein 280) | Flnc | 362332 | 1,54 | down |
| 5827097 | 7252051 | 1502509 | filamin C, gamma (actin binding protein 280) | Flnc | 362332 | 1,33 | up   |
| 5847685 | 7252051 | 1502519 | filamin C, gamma (actin binding protein 280) | Flnc | 362332 | 1,17 | up   |
| 5862581 | 7252051 | 1502523 | filamin C, gamma (actin binding protein 280) | Flnc | 362332 | 1,01 | up   |
| 5911348 | 7252051 | 1502479 | filamin C, gamma (actin binding protein 280) | Flnc | 362332 | 1,29 | down |
| 5918226 | 7252051 | 1502486 | filamin C, gamma (actin binding protein 280) | Flnc | 362332 | 1,11 | up   |
| 5919300 | 7252051 | 1502503 | filamin C, gamma (actin binding protein 280) | Flnc | 362332 | 1,13 | down |
| 5937012 | 7252051 | 1502494 | filamin C, gamma (actin binding protein 280) | Flnc | 362332 | 1,03 | up   |
| 5959677 | 7252051 | 1502492 | filamin C, gamma (actin binding protein 280) | Flnc | 362332 | 1,23 | down |
| 5977021 | 7252051 | 1502501 | filamin C, gamma (actin binding protein 280) | Flnc | 362332 | 1,10 | up   |
| 5978763 | 7252051 | 1502526 | filamin C, gamma (actin binding protein 280) | Flnc | 362332 | 1,03 | up   |
| 6032380 | 7252051 | 1502512 | filamin C, gamma (actin binding protein 280) | Flnc | 362332 | 1,00 | up   |
| 6035255 | 7252051 | 1502490 | filamin C, gamma (actin binding protein 280) | Flnc | 362332 | 1,19 | up   |
| 6048419 | 7252051 | 1502522 | filamin C, gamma (actin binding protein 280) | Flnc | 362332 | 1,00 | up   |
| 6049370 | 7252051 | 1502498 | filamin C, gamma (actin binding protein 280) | Flnc | 362332 | 1,05 | down |
| 6060039 | 7252051 | 1502514 | filamin C, gamma (actin binding protein 280) | Flnc | 362332 | 1,64 | down |
| 6068274 | 7252051 | 1502517 | filamin C, gamma (actin binding protein 280) | Flnc | 362332 | 1,28 | down |
| 6093543 | 7252051 | 1502485 | filamin C, gamma (actin binding protein 280) | Flnc | 362332 | 1,25 | down |
| 6188258 | 7252051 | 1502516 | filamin C, gamma (actin binding protein 280) | Flnc | 362332 | 1,18 | down |
| 6215379 | 7252051 | 1502507 | filamin C, gamma (actin binding protein 280) | Flnc | 362332 | 1,05 | down |
| 6227064 | 7252051 | 1502511 | filamin C, gamma (actin binding protein 280) | Flnc | 362332 | 1,21 | up   |
| 6241748 | 7252051 | 1502493 | filamin C, gamma (actin binding protein 280) | Flnc | 362332 | 1,01 | up   |
| 6245407 | 7252051 | 1502525 | filamin C, gamma (actin binding protein 280) | Flnc | 362332 | 1,03 | up   |
| 6285118 | 7252051 | 1502515 | filamin C, gamma (actin binding protein 280) | Flnc | 362332 | 1,21 | down |
| 6297867 | 7252051 | 1502497 | filamin C, gamma (actin binding protein 280) | Flnc | 362332 | 1,18 | up   |
| 6307649 | 7252051 | 1502483 | filamin C, gamma (actin binding protein 280) | Flnc | 362332 | 1,18 | up   |
| 6320851 | 7252051 | 1502510 | filamin C, gamma (actin binding protein 280) | Flnc | 362332 | 1,53 | down |
| 6338741 | 7252051 | 1502489 | filamin C, gamma (actin binding protein 280) | Flnc | 362332 | 1,05 | up   |
| 6339023 | 7252051 | 1502504 | filamin C, gamma (actin binding protein 280) | Flnc | 362332 | 1,00 | down |
| 6348220 | 7252051 | 1502520 | filamin C, gamma (actin binding protein 280) | Flnc | 362332 | 2,21 | down |
| 6501361 | 7252051 | 1502513 | filamin C, gamma (actin binding protein 280) | Flnc | 362332 | 1,02 | up   |
| 6502177 | 7252051 | 1502491 | filamin C, gamma (actin binding protein 280) | Flnc | 362332 | 1,08 | up   |
| 6509271 | 7252051 | 1502528 | filamin C, gamma (actin binding protein 280) | Flnc | 362332 | 1,60 | up   |
| 6536249 | 7252051 | 1502505 | filamin C, gamma (actin binding protein 280) | Flnc | 362332 | 1,00 | up   |
| 6537177 | 7252051 | 1502482 | filamin C, gamma (actin binding protein 280) | Flnc | 362332 | 1,04 | up   |
| 6583490 | 7252051 | 1502502 | filamin C, gamma (actin binding protein 280) | Flnc | 362332 | 1,01 | up   |
| 6616191 | 7252051 | 1502529 | filamin C, gamma (actin binding protein 280) | Flnc | 362332 | 1,17 | down |
| 6616664 | 7252051 | 1502495 | filamin C, gamma (actin binding protein 280) | Flnc | 362332 | 2,23 | down |
| 6722717 | 7252051 | 1502508 | filamin C, gamma (actin binding protein 280) | Flnc | 362332 | 1,42 | up   |
| 5630382 | 7378637 | 1817799 | filamin, alpha                               | Flna | 293860 | 1,61 | up   |
| 5644122 | 7378637 | 1817827 | filamin, alpha                               | Flna | 293860 | 1,23 | up   |
| 5647607 | 7378637 | 1817815 | filamin, alpha                               | Flna | 293860 | 1,37 | up   |
| 5665149 | 7378637 | 1817788 | filamin, alpha                               | Flna | 293860 | 1,60 | down |
| 5710497 | 7378637 | 1817803 | filamin, alpha                               | Flna | 293860 | 1,23 | up   |

|         |         |         |                |      |        |      |      |
|---------|---------|---------|----------------|------|--------|------|------|
| 5725495 | 7378637 | 1817830 | filamin, alpha | Flna | 293860 | 1,11 | down |
| 5739429 | 7378637 | 1817831 | filamin, alpha | Flna | 293860 | 1,01 | down |
| 5754807 | 7378637 | 1817828 | filamin, alpha | Flna | 293860 | 1,19 | down |
| 5773696 | 7378637 | 1817831 | filamin, alpha | Flna | 293860 | 1,11 | up   |
| 5786797 | 7378637 | 1817825 | filamin, alpha | Flna | 293860 | 1,88 | up   |
| 5804125 | 7378637 | 1817829 | filamin, alpha | Flna | 293860 | 1,15 | up   |
| 5807256 | 7378637 | 1817817 | filamin, alpha | Flna | 293860 | 1,01 | up   |
| 5844462 | 7378637 | 1817788 | filamin, alpha | Flna | 293860 | 2,09 | down |
| 5851971 | 7378637 | 1817789 | filamin, alpha | Flna | 293860 | 1,17 | up   |
| 5855140 | 7378637 | 1817793 | filamin, alpha | Flna | 293860 | 1,13 | up   |
| 5872327 | 7378637 | 1817805 | filamin, alpha | Flna | 293860 | 1,21 | down |
| 5876638 | 7378637 | 1817790 | filamin, alpha | Flna | 293860 | 1,37 | down |
| 5908366 | 7378637 | 1817801 | filamin, alpha | Flna | 293860 | 1,21 | up   |
| 5914868 | 7378637 | 1817819 | filamin, alpha | Flna | 293860 | 1,45 | down |
| 5940254 | 7378637 | 1817800 | filamin, alpha | Flna | 293860 | 1,17 | down |
| 5975553 | 7378637 | 1817808 | filamin, alpha | Flna | 293860 | 1,32 | up   |
| 5994893 | 7378637 | 1817809 | filamin, alpha | Flna | 293860 | 1,18 | down |
| 6067453 | 7378637 | 1817792 | filamin, alpha | Flna | 293860 | 1,13 | down |
| 6082876 | 7378637 | 1817829 | filamin, alpha | Flna | 293860 | 1,16 | up   |
| 6103365 | 7378637 | 1817818 | filamin, alpha | Flna | 293860 | 1,19 | up   |
| 6121619 | 7378637 | 1817806 | filamin, alpha | Flna | 293860 | 1,05 | down |
| 6205371 | 7378637 | 1817797 | filamin, alpha | Flna | 293860 | 1,03 | up   |
| 6219369 | 7378637 | 1817833 | filamin, alpha | Flna | 293860 | 1,47 | down |
| 6290852 | 7378637 | 1817824 | filamin, alpha | Flna | 293860 | 1,33 | up   |
| 6321917 | 7378637 | 1817822 | filamin, alpha | Flna | 293860 | 1,33 | up   |
| 6323115 | 7378637 | 1817832 | filamin, alpha | Flna | 293860 | 1,21 | up   |
| 6379422 | 7378637 | 1817802 | filamin, alpha | Flna | 293860 | 1,07 | down |
| 6396459 | 7378637 | 1817829 | filamin, alpha | Flna | 293860 | 1,17 | up   |
| 6405766 | 7378637 | 1817794 | filamin, alpha | Flna | 293860 | 1,08 | up   |
| 6424942 | 7378637 | 1817804 | filamin, alpha | Flna | 293860 | 1,42 | down |
| 6424989 | 7378637 | 1817788 | filamin, alpha | Flna | 293860 | 1,08 | up   |
| 6436876 | 7378637 | 1817823 | filamin, alpha | Flna | 293860 | 1,01 | down |
| 6437573 | 7378637 | 1817810 | filamin, alpha | Flna | 293860 | 1,21 | down |
| 6454051 | 7378637 | 1817832 | filamin, alpha | Flna | 293860 | 1,10 | down |
| 6467254 | 7378637 | 1817812 | filamin, alpha | Flna | 293860 | 1,24 | up   |
| 6469871 | 7378637 | 1817821 | filamin, alpha | Flna | 293860 | 1,07 | down |
| 6478433 | 7378637 | 1817791 | filamin, alpha | Flna | 293860 | 1,07 | up   |
| 6499286 | 7378637 | 1817807 | filamin, alpha | Flna | 293860 | 1,30 | down |
| 6510816 | 7378637 | 1817813 | filamin, alpha | Flna | 293860 | 1,13 | up   |
| 6516709 | 7378637 | 1817811 | filamin, alpha | Flna | 293860 | 1,44 | up   |
| 6519702 | 7378637 | 1817820 | filamin, alpha | Flna | 293860 | 1,38 | up   |
| 6584249 | 7378637 | 1817796 | filamin, alpha | Flna | 293860 | 1,02 | down |
| 6616832 | 7378637 | 1817826 | filamin, alpha | Flna | 293860 | 1,02 | up   |
| 6645908 | 7378637 | 1817795 | filamin, alpha | Flna | 293860 | 1,09 | up   |
| 6659978 | 7378637 | 1817814 | filamin, alpha | Flna | 293860 | 1,00 | down |
| 6677062 | 7378637 | 1817798 | filamin, alpha | Flna | 293860 | 1,66 | up   |
| 5624722 | 7136977 | 1218834 | filamin, beta  | Flnb | 306204 | 1,03 | down |
| 5654155 | 7136977 | 1218815 | filamin, beta  | Flnb | 306204 | 1,27 | up   |
| 5673601 | 7136977 | 1218816 | filamin, beta  | Flnb | 306204 | 1,12 | up   |
| 5691617 | 7136977 | 1218844 | filamin, beta  | Flnb | 306204 | 1,10 | up   |
| 5696533 | 7136977 | 1218821 | filamin, beta  | Flnb | 306204 | 1,06 | down |
| 5716934 | 7136977 | 1218800 | filamin, beta  | Flnb | 306204 | 1,16 | down |
| 5719019 | 7136977 | 1218848 | filamin, beta  | Flnb | 306204 | 1,01 | down |
| 5724629 | 7136977 | 1218828 | filamin, beta  | Flnb | 306204 | 1,12 | up   |
| 5760892 | 7136977 | 1218822 | filamin, beta  | Flnb | 306204 | 1,08 | up   |
| 5768146 | 7136977 | 1218842 | filamin, beta  | Flnb | 306204 | 1,18 | down |

|         |         |         |                               |        |        |      |      |
|---------|---------|---------|-------------------------------|--------|--------|------|------|
| 5770400 | 7136977 | 1218803 | filamin, beta                 | Flnb   | 306204 | 1,29 | down |
| 5799295 | 7136977 | 1218854 | filamin, beta                 | Flnb   | 306204 | 1,27 | down |
| 5817088 | 7136977 | 1218829 | filamin, beta                 | Flnb   | 306204 | 1,06 | up   |
| 5826315 | 7136977 | 1218813 | filamin, beta                 | Flnb   | 306204 | 1,07 | up   |
| 5873922 | 7136977 | 1218857 | filamin, beta                 | Flnb   | 306204 | 1,15 | up   |
| 5887673 | 7136977 | 1218817 | filamin, beta                 | Flnb   | 306204 | 1,15 | up   |
| 5930687 | 7136977 | 1218852 | filamin, beta                 | Flnb   | 306204 | 1,02 | down |
| 5970358 | 7136977 | 1218837 | filamin, beta                 | Flnb   | 306204 | 1,20 | up   |
| 5982429 | 7136977 | 1218810 | filamin, beta                 | Flnb   | 306204 | 1,23 | down |
| 5999746 | 7136977 | 1218799 | filamin, beta                 | Flnb   | 306204 | 1,04 | down |
| 6086606 | 7136977 | 1218831 | filamin, beta                 | Flnb   | 306204 | 1,10 | down |
| 6090685 | 7136977 | 1218850 | filamin, beta                 | Flnb   | 306204 | 1,11 | down |
| 6147184 | 7136977 | 1218807 | filamin, beta                 | Flnb   | 306204 | 1,02 | up   |
| 6179740 | 7136977 | 1218811 | filamin, beta                 | Flnb   | 306204 | 1,06 | up   |
| 6196378 | 7136977 | 1218805 | filamin, beta                 | Flnb   | 306204 | 1,15 | down |
| 6200359 | 7136977 | 1218814 | filamin, beta                 | Flnb   | 306204 | 1,11 | down |
| 6222048 | 7136977 | 1218840 | filamin, beta                 | Flnb   | 306204 | 1,04 | down |
| 6268713 | 7136977 | 1218818 | filamin, beta                 | Flnb   | 306204 | 1,17 | up   |
| 6286288 | 7136977 | 1218841 | filamin, beta                 | Flnb   | 306204 | 1,06 | down |
| 6317795 | 7136977 | 1218839 | filamin, beta                 | Flnb   | 306204 | 1,33 | down |
| 6332430 | 7136977 | 1218835 | filamin, beta                 | Flnb   | 306204 | 1,02 | up   |
| 6374897 | 7136977 | 1218823 | filamin, beta                 | Flnb   | 306204 | 1,13 | up   |
| 6375370 | 7136977 | 1218804 | filamin, beta                 | Flnb   | 306204 | 1,14 | down |
| 6415368 | 7136977 | 1218820 | filamin, beta                 | Flnb   | 306204 | 1,21 | up   |
| 6424673 | 7136977 | 1218851 | filamin, beta                 | Flnb   | 306204 | 1,04 | up   |
| 6444703 | 7136977 | 1218838 | filamin, beta                 | Flnb   | 306204 | 1,01 | up   |
| 6448703 | 7136977 | 1218830 | filamin, beta                 | Flnb   | 306204 | 1,07 | down |
| 6451466 | 7136977 | 1218862 | filamin, beta                 | Flnb   | 306204 | 1,15 | up   |
| 6473339 | 7136977 | 1218806 | filamin, beta                 | Flnb   | 306204 | 1,19 | down |
| 6474316 | 7136977 | 1218799 | filamin, beta                 | Flnb   | 306204 | 1,16 | down |
| 6492892 | 7136977 | 1218836 | filamin, beta                 | Flnb   | 306204 | 1,05 | up   |
| 6493188 | 7136977 | 1218862 | filamin, beta                 | Flnb   | 306204 | 1,07 | up   |
| 6511825 | 7136977 | 1218862 | filamin, beta                 | Flnb   | 306204 | 1,69 | down |
| 6543426 | 7136977 | 1218824 | filamin, beta                 | Flnb   | 306204 | 1,03 | down |
| 6606359 | 7136977 | 1218818 | filamin, beta                 | Flnb   | 306204 | 1,20 | up   |
| 6622485 | 7136977 | 1218801 | filamin, beta                 | Flnb   | 306204 | 1,39 | down |
| 6633990 | 7136977 | 1218806 | filamin, beta                 | Flnb   | 306204 | 1,27 | down |
| 6638343 | 7136977 | 1218843 | filamin, beta                 | Flnb   | 306204 | 1,07 | down |
| 6681511 | 7136977 | 1218855 | filamin, beta                 | Flnb   | 306204 | 1,02 | up   |
| 6690465 | 7136977 | 1218832 | filamin, beta                 | Flnb   | 306204 | 1,05 | up   |
| 5740856 | 7072116 | 1061164 | FK506 binding protein 10      | Fkbp10 | 360627 | 1,07 | down |
| 5764420 | 7072116 | 1061161 | FK506 binding protein 10      | Fkbp10 | 360627 | 1,70 | up   |
| 5783884 | 7072116 | 1061158 | FK506 binding protein 10      | Fkbp10 | 360627 | 1,13 | up   |
| 5816091 | 7072116 | 1061157 | FK506 binding protein 10      | Fkbp10 | 360627 | 1,52 | down |
| 5844404 | 7072116 | 1061165 | FK506 binding protein 10      | Fkbp10 | 360627 | 1,04 | down |
| 5917481 | 7072116 | 1061156 | FK506 binding protein 10      | Fkbp10 | 360627 | 1,51 | up   |
| 6088634 | 7072116 | 1061162 | FK506 binding protein 10      | Fkbp10 | 360627 | 2,07 | up   |
| 6441644 | 7072116 | 1061159 | FK506 binding protein 10      | Fkbp10 | 360627 | 1,38 | down |
| 6460926 | 7072116 | 1061155 | FK506 binding protein 10      | Fkbp10 | 360627 | 2,26 | up   |
| 6662614 | 7072116 | 1061160 | FK506 binding protein 10      | Fkbp10 | 360627 | 1,03 | up   |
| 6667836 | 7072116 | 1061163 | FK506 binding protein 10      | Fkbp10 | 360627 | 1,37 | down |
| 5623998 | 7067174 | 1049073 | fms-related tyrosine kinase 4 | Flt4   | 114110 | 1,05 | up   |
| 5781880 | 7067174 | 1049091 | fms-related tyrosine kinase 4 | Flt4   | 114110 | 1,37 | up   |
| 5791570 | 7067174 | 1049074 | fms-related tyrosine kinase 4 | Flt4   | 114110 | 1,25 | down |
| 5803850 | 7067174 | 1049071 | fms-related tyrosine kinase 4 | Flt4   | 114110 | 1,20 | up   |
| 5847340 | 7067174 | 1049068 | fms-related tyrosine kinase 4 | Flt4   | 114110 | 1,19 | up   |

|         |         |         |                               |       |        |      |      |
|---------|---------|---------|-------------------------------|-------|--------|------|------|
| 5855591 | 7067174 | 1049094 | fms-related tyrosine kinase 4 | Flt4  | 114110 | 1,45 | up   |
| 5864515 | 7067174 | 1049090 | fms-related tyrosine kinase 4 | Flt4  | 114110 | 1,04 | down |
| 5896735 | 7067174 | 1049092 | fms-related tyrosine kinase 4 | Flt4  | 114110 | 1,43 | up   |
| 5907717 | 7067174 | 1049087 | fms-related tyrosine kinase 4 | Flt4  | 114110 | 1,05 | up   |
| 5928772 | 7067174 | 1049080 | fms-related tyrosine kinase 4 | Flt4  | 114110 | 1,20 | down |
| 5975610 | 7067174 | 1049075 | fms-related tyrosine kinase 4 | Flt4  | 114110 | 2,21 | up   |
| 5998307 | 7067174 | 1049096 | fms-related tyrosine kinase 4 | Flt4  | 114110 | 1,18 | down |
| 6029958 | 7067174 | 1049086 | fms-related tyrosine kinase 4 | Flt4  | 114110 | 1,04 | down |
| 6088605 | 7067174 | 1049070 | fms-related tyrosine kinase 4 | Flt4  | 114110 | 1,12 | down |
| 6128164 | 7067174 | 1049069 | fms-related tyrosine kinase 4 | Flt4  | 114110 | 1,29 | down |
| 6151720 | 7067174 | 1049072 | fms-related tyrosine kinase 4 | Flt4  | 114110 | 1,17 | up   |
| 6193504 | 7067174 | 1049091 | fms-related tyrosine kinase 4 | Flt4  | 114110 | 1,93 | up   |
| 6220744 | 7067174 | 1049097 | fms-related tyrosine kinase 4 | Flt4  | 114110 | 1,02 | up   |
| 6281595 | 7067174 | 1049076 | fms-related tyrosine kinase 4 | Flt4  | 114110 | 1,34 | down |
| 6308272 | 7067174 | 1049083 | fms-related tyrosine kinase 4 | Flt4  | 114110 | 1,04 | up   |
| 6333233 | 7067174 | 1049078 | fms-related tyrosine kinase 4 | Flt4  | 114110 | 1,09 | up   |
| 6424812 | 7067174 | 1049082 | fms-related tyrosine kinase 4 | Flt4  | 114110 | 1,41 | up   |
| 6425188 | 7067174 | 1049085 | fms-related tyrosine kinase 4 | Flt4  | 114110 | 1,09 | down |
| 6444210 | 7067174 | 1049093 | fms-related tyrosine kinase 4 | Flt4  | 114110 | 1,20 | up   |
| 6448758 | 7067174 | 1049084 | fms-related tyrosine kinase 4 | Flt4  | 114110 | 1,35 | down |
| 6453620 | 7067174 | 1049077 | fms-related tyrosine kinase 4 | Flt4  | 114110 | 1,18 | up   |
| 6498330 | 7067174 | 1049095 | fms-related tyrosine kinase 4 | Flt4  | 114110 | 1,77 | down |
| 6521482 | 7067174 | 1049089 | fms-related tyrosine kinase 4 | Flt4  | 114110 | 1,07 | up   |
| 6563441 | 7067174 | 1049079 | fms-related tyrosine kinase 4 | Flt4  | 114110 | 1,08 | down |
| 6573137 | 7067174 | 1049081 | fms-related tyrosine kinase 4 | Flt4  | 114110 | 1,08 | down |
| 6634146 | 7067174 | 1049071 | fms-related tyrosine kinase 4 | Flt4  | 114110 | 1,39 | up   |
| 6679013 | 7067174 | 1049067 | fms-related tyrosine kinase 4 | Flt4  | 114110 | 1,07 | down |
| 6738972 | 7067174 | 1049088 | fms-related tyrosine kinase 4 | Flt4  | 114110 | 1,01 | up   |
| 5635127 | 7093632 | 1111758 | follistatin-like 1            | Fstl1 | 79210  | 1,02 | up   |
| 5798732 | 7093632 | 1111750 | follistatin-like 1            | Fstl1 | 79210  | 1,18 | up   |
| 5813958 | 7093632 | 1111751 | follistatin-like 1            | Fstl1 | 79210  | 1,15 | down |
| 5932714 | 7093632 | 1111757 | follistatin-like 1            | Fstl1 | 79210  | 1,35 | up   |
| 6120723 | 7093632 | 1111750 | follistatin-like 1            | Fstl1 | 79210  | 1,15 | down |
| 6125918 | 7093632 | 1111759 | follistatin-like 1            | Fstl1 | 79210  | 1,49 | down |
| 6384252 | 7093632 | 1111753 | follistatin-like 1            | Fstl1 | 79210  | 1,01 | up   |
| 6470117 | 7093632 | 1111755 | follistatin-like 1            | Fstl1 | 79210  | 2,10 | up   |
| 6483176 | 7093632 | 1111754 | follistatin-like 1            | Fstl1 | 79210  | 1,21 | down |
| 6610974 | 7093632 | 1111760 | follistatin-like 1            | Fstl1 | 79210  | 1,35 | up   |
| 6656135 | 7093632 | 1111756 | follistatin-like 1            | Fstl1 | 79210  | 1,02 | down |
| 6681017 | 7093632 | 1111752 | follistatin-like 1            | Fstl1 | 79210  | 2,79 | down |
| 5661902 | 7258776 | 1519649 | forkhead box M1               | Foxm1 | 58921  | 1,01 | down |
| 5674544 | 7258776 | 1519653 | forkhead box M1               | Foxm1 | 58921  | 1,11 | down |
| 6016344 | 7258776 | 1519652 | forkhead box M1               | Foxm1 | 58921  | 1,61 | up   |
| 6092598 | 7258776 | 1519647 | forkhead box M1               | Foxm1 | 58921  | 1,12 | up   |
| 6111916 | 7258776 | 1519650 | forkhead box M1               | Foxm1 | 58921  | 1,05 | up   |
| 6195313 | 7258776 | 1519654 | forkhead box M1               | Foxm1 | 58921  | 1,17 | up   |
| 6331122 | 7258776 | 1519648 | forkhead box M1               | Foxm1 | 58921  | 1,26 | up   |
| 6344213 | 7258776 | 1519655 | forkhead box M1               | Foxm1 | 58921  | 1,15 | up   |
| 6472338 | 7258776 | 1519648 | forkhead box M1               | Foxm1 | 58921  | 1,10 | down |
| 6627504 | 7258776 | 1519648 | forkhead box M1               | Foxm1 | 58921  | 1,33 | down |
| 6716158 | 7258776 | 1519651 | forkhead box M1               | Foxm1 | 58921  | 1,11 | down |
| 6732288 | 7258776 | 1519648 | forkhead box M1               | Foxm1 | 58921  | 2,00 | down |
| 5709862 | 7224035 | 1432400 | forkhead box O3               | Foxo3 | 294515 | 1,43 | down |
| 5722965 | 7224035 | 1432400 | forkhead box O3               | Foxo3 | 294515 | 1,21 | up   |
| 5725624 | 7224035 | 1432402 | forkhead box O3               | Foxo3 | 294515 | 1,02 | up   |
| 6138702 | 7224035 | 1432383 | forkhead box O3               | Foxo3 | 294515 | 1,06 | down |

|         |         |         |                 |       |        |      |      |
|---------|---------|---------|-----------------|-------|--------|------|------|
| 6254892 | 7224035 | 1432400 | forkhead box O3 | Foxo3 | 294515 | 1,05 | up   |
| 6301401 | 7224035 | 1432386 | forkhead box O3 | Foxo3 | 294515 | 1,41 | up   |
| 6464203 | 7224035 | 1432386 | forkhead box O3 | Foxo3 | 294515 | 1,34 | up   |
| 5653675 | 7267802 | 1541774 | forkhead box P1 | Foxp1 | 297480 | 1,12 | down |
| 5844360 | 7267802 | 1541763 | forkhead box P1 | Foxp1 | 297480 | 1,31 | up   |
| 5921580 | 7267802 | 1541734 | forkhead box P1 | Foxp1 | 297480 | 1,18 | up   |
| 5999619 | 7267802 | 1541745 | forkhead box P1 | Foxp1 | 297480 | 1,01 | down |
| 6050900 | 7267802 | 1541817 | forkhead box P1 | Foxp1 | 297480 | 1,15 | down |
| 6176912 | 7267802 | 1541758 | forkhead box P1 | Foxp1 | 297480 | 1,15 | up   |
| 6211212 | 7267802 | 1541734 | forkhead box P1 | Foxp1 | 297480 | 1,94 | down |
| 6316307 | 7267802 | 1541754 | forkhead box P1 | Foxp1 | 297480 | 1,02 | up   |
| 6406262 | 7267802 | 1541738 | forkhead box P1 | Foxp1 | 297480 | 1,44 | down |
| 6419157 | 7267802 | 1541743 | forkhead box P1 | Foxp1 | 297480 | 1,33 | down |
| 6466224 | 7267802 | 1541754 | forkhead box P1 | Foxp1 | 297480 | 1,36 | down |
| 6475705 | 7267802 | 1541769 | forkhead box P1 | Foxp1 | 297480 | 1,10 | down |
| 6540853 | 7267802 | 1541780 | forkhead box P1 | Foxp1 | 297480 | 1,14 | down |
| 6561658 | 7267802 | 1541744 | forkhead box P1 | Foxp1 | 297480 | 1,12 | down |
| 6645491 | 7267802 | 1541778 | forkhead box P1 | Foxp1 | 297480 | 1,21 | down |
| 6660813 | 7267802 | 1541796 | forkhead box P1 | Foxp1 | 297480 | 1,74 | down |
| 6688169 | 7267802 | 1541741 | forkhead box P1 | Foxp1 | 297480 | 1,25 | up   |
| 6690082 | 7267802 | 1541774 | forkhead box P1 | Foxp1 | 297480 | 1,28 | up   |
| 6723306 | 7267802 | 1541746 | forkhead box P1 | Foxp1 | 297480 | 1,08 | up   |
| 5658450 | 7380019 | 1820809 | forkhead box P3 | Foxp3 | 317382 | 1,19 | down |
| 5729988 | 7380019 | 1820815 | forkhead box P3 | Foxp3 | 317382 | 1,08 | down |
| 5835238 | 7380019 | 1820820 | forkhead box P3 | Foxp3 | 317382 | 1,09 | down |
| 5839590 | 7380019 | 1820814 | forkhead box P3 | Foxp3 | 317382 | 1,00 | up   |
| 5887438 | 7380019 | 1820826 | forkhead box P3 | Foxp3 | 317382 | 1,20 | up   |
| 5906129 | 7380019 | 1820813 | forkhead box P3 | Foxp3 | 317382 | 1,36 | up   |
| 5916909 | 7380019 | 1820812 | forkhead box P3 | Foxp3 | 317382 | 1,19 | up   |
| 5968313 | 7380019 | 1820822 | forkhead box P3 | Foxp3 | 317382 | 1,18 | down |
| 6047016 | 7380019 | 1820816 | forkhead box P3 | Foxp3 | 317382 | 1,37 | down |
| 6078733 | 7380019 | 1820809 | forkhead box P3 | Foxp3 | 317382 | 1,13 | up   |
| 6198710 | 7380019 | 1820809 | forkhead box P3 | Foxp3 | 317382 | 1,10 | down |
| 6391595 | 7380019 | 1820826 | forkhead box P3 | Foxp3 | 317382 | 1,33 | down |
| 6396262 | 7380019 | 1820818 | forkhead box P3 | Foxp3 | 317382 | 1,28 | up   |
| 6565770 | 7380019 | 1820817 | forkhead box P3 | Foxp3 | 317382 | 2,10 | down |
| 6622656 | 7380019 | 1820810 | forkhead box P3 | Foxp3 | 317382 | 1,02 | up   |
| 6687329 | 7380019 | 1820808 | forkhead box P3 | Foxp3 | 317382 | 1,92 | up   |
| 5656282 | 7108062 | 1147137 | formin 2        | Fmn2  | 289262 | 1,13 | up   |
| 5672134 | 7108062 | 1147137 | formin 2        | Fmn2  | 289262 | 1,65 | up   |
| 5686906 | 7108062 | 1147137 | formin 2        | Fmn2  | 289262 | 1,09 | down |
| 5688896 | 7108062 | 1147155 | formin 2        | Fmn2  | 289262 | 1,64 | up   |
| 5752699 | 7108062 | 1147189 | formin 2        | Fmn2  | 289262 | 1,26 | down |
| 5774599 | 7108062 | 1147155 | formin 2        | Fmn2  | 289262 | 3,34 | up   |
| 5787120 | 7108062 | 1147137 | formin 2        | Fmn2  | 289262 | 1,28 | down |
| 5801136 | 7108062 | 1147137 | formin 2        | Fmn2  | 289262 | 1,81 | up   |
| 5827031 | 7108062 | 1147174 | formin 2        | Fmn2  | 289262 | 1,19 | up   |
| 5862848 | 7108062 | 1147183 | formin 2        | Fmn2  | 289262 | 1,24 | down |
| 5875650 | 7108062 | 1147155 | formin 2        | Fmn2  | 289262 | 1,08 | down |
| 5895951 | 7108062 | 1147170 | formin 2        | Fmn2  | 289262 | 1,55 | down |
| 5900076 | 7108062 | 1147155 | formin 2        | Fmn2  | 289262 | 1,34 | up   |
| 5971543 | 7108062 | 1147172 | formin 2        | Fmn2  | 289262 | 1,08 | down |
| 6011538 | 7108062 | 1147157 | formin 2        | Fmn2  | 289262 | 1,01 | down |
| 6069220 | 7108062 | 1147154 | formin 2        | Fmn2  | 289262 | 1,08 | up   |
| 6133282 | 7108062 | 1147154 | formin 2        | Fmn2  | 289262 | 1,43 | up   |
| 6152852 | 7108062 | 1147150 | formin 2        | Fmn2  | 289262 | 1,05 | down |

|         |         |         |                          |       |        |      |      |
|---------|---------|---------|--------------------------|-------|--------|------|------|
| 6200080 | 7108062 | 1147147 | formin 2                 | Fmn2  | 289262 | 1,18 | down |
| 6248771 | 7108062 | 1147154 | formin 2                 | Fmn2  | 289262 | 1,03 | up   |
| 6251292 | 7108062 | 1147165 | formin 2                 | Fmn2  | 289262 | 1,05 | down |
| 6274076 | 7108062 | 1147137 | formin 2                 | Fmn2  | 289262 | 1,26 | up   |
| 6291820 | 7108062 | 1147171 | formin 2                 | Fmn2  | 289262 | 1,11 | down |
| 6367099 | 7108062 | 1147137 | formin 2                 | Fmn2  | 289262 | 1,23 | down |
| 6445569 | 7108062 | 1147142 | formin 2                 | Fmn2  | 289262 | 1,37 | down |
| 6529559 | 7108062 | 1147164 | formin 2                 | Fmn2  | 289262 | 1,78 | up   |
| 6681213 | 7108062 | 1147191 | formin 2                 | Fmn2  | 289262 | 1,35 | down |
| 6736960 | 7108062 | 1147173 | formin 2                 | Fmn2  | 289262 | 1,04 | down |
| 6737347 | 7108062 | 1147179 | formin 2                 | Fmn2  | 289262 | 1,24 | down |
| 5795538 | 7237530 | 1467001 | formin binding protein 1 | Fnbp1 | 192348 | 1,49 | up   |
| 5862181 | 7237530 | 1467002 | formin binding protein 1 | Fnbp1 | 192348 | 2,03 | down |
| 5958101 | 7237530 | 1466998 | formin binding protein 1 | Fnbp1 | 192348 | 1,13 | down |
| 5961555 | 7237530 | 1466991 | formin binding protein 1 | Fnbp1 | 192348 | 1,48 | up   |
| 5998770 | 7237530 | 1466997 | formin binding protein 1 | Fnbp1 | 192348 | 1,63 | up   |
| 6015696 | 7237530 | 1466990 | formin binding protein 1 | Fnbp1 | 192348 | 1,04 | down |
| 6062141 | 7237530 | 1466994 | formin binding protein 1 | Fnbp1 | 192348 | 1,13 | down |
| 6092659 | 7237530 | 1466995 | formin binding protein 1 | Fnbp1 | 192348 | 2,26 | down |
| 6200044 | 7237530 | 1466992 | formin binding protein 1 | Fnbp1 | 192348 | 1,45 | down |
| 6357971 | 7237530 | 1466999 | formin binding protein 1 | Fnbp1 | 192348 | 2,37 | up   |
| 6373220 | 7237530 | 1466993 | formin binding protein 1 | Fnbp1 | 192348 | 1,08 | down |
| 6600507 | 7237530 | 1466995 | formin binding protein 1 | Fnbp1 | 192348 | 1,27 | down |
| 6615871 | 7237530 | 1466996 | formin binding protein 1 | Fnbp1 | 192348 | 1,19 | down |
| 6633485 | 7237530 | 1467000 | formin binding protein 1 | Fnbp1 | 192348 | 1,06 | up   |
| 6651313 | 7237530 | 1467003 | formin binding protein 1 | Fnbp1 | 192348 | 1,07 | up   |
| 5687061 | 7229885 | 1447140 | formin binding protein 4 | Fnbp4 | 311183 | 1,38 | up   |
| 5822090 | 7229885 | 1447139 | formin binding protein 4 | Fnbp4 | 311183 | 1,27 | up   |
| 5835632 | 7229885 | 1447142 | formin binding protein 4 | Fnbp4 | 311183 | 1,15 | up   |
| 6001346 | 7229885 | 1447141 | formin binding protein 4 | Fnbp4 | 311183 | 1,65 | up   |
| 6070538 | 7229885 | 1447142 | formin binding protein 4 | Fnbp4 | 311183 | 2,39 | down |
| 6170192 | 7229885 | 1447141 | formin binding protein 4 | Fnbp4 | 311183 | 1,05 | up   |
| 6393243 | 7229885 | 1447141 | formin binding protein 4 | Fnbp4 | 311183 | 1,03 | down |
| 6628034 | 7229885 | 1447141 | formin binding protein 4 | Fnbp4 | 311183 | 1,21 | up   |
| 6635429 | 7229885 | 1447142 | formin binding protein 4 | Fnbp4 | 311183 | 1,50 | down |
| 5762510 | 7072552 | 1062119 | formin-like 1            | Fmnl1 | 287746 | 1,13 | up   |
| 5809567 | 7072552 | 1062124 | formin-like 1            | Fmnl1 | 287746 | 1,23 | down |
| 5909293 | 7072552 | 1062144 | formin-like 1            | Fmnl1 | 287746 | 1,17 | up   |
| 5909581 | 7072552 | 1062137 | formin-like 1            | Fmnl1 | 287746 | 1,29 | down |
| 5919709 | 7072552 | 1062137 | formin-like 1            | Fmnl1 | 287746 | 1,11 | down |
| 5985435 | 7072552 | 1062134 | formin-like 1            | Fmnl1 | 287746 | 1,23 | down |
| 5986662 | 7072552 | 1062143 | formin-like 1            | Fmnl1 | 287746 | 1,00 | up   |
| 5993092 | 7072552 | 1062123 | formin-like 1            | Fmnl1 | 287746 | 1,38 | up   |
| 6040376 | 7072552 | 1062138 | formin-like 1            | Fmnl1 | 287746 | 1,36 | down |
| 6063882 | 7072552 | 1062133 | formin-like 1            | Fmnl1 | 287746 | 1,20 | up   |
| 6099238 | 7072552 | 1062121 | formin-like 1            | Fmnl1 | 287746 | 1,12 | up   |
| 6141189 | 7072552 | 1062144 | formin-like 1            | Fmnl1 | 287746 | 1,10 | down |
| 6149204 | 7072552 | 1062140 | formin-like 1            | Fmnl1 | 287746 | 1,11 | down |
| 6181673 | 7072552 | 1062126 | formin-like 1            | Fmnl1 | 287746 | 1,08 | down |
| 6206201 | 7072552 | 1062133 | formin-like 1            | Fmnl1 | 287746 | 1,00 | up   |
| 6216717 | 7072552 | 1062134 | formin-like 1            | Fmnl1 | 287746 | 1,15 | up   |
| 6218487 | 7072552 | 1062141 | formin-like 1            | Fmnl1 | 287746 | 1,07 | up   |
| 6265463 | 7072552 | 1062122 | formin-like 1            | Fmnl1 | 287746 | 1,11 | up   |
| 6268643 | 7072552 | 1062142 | formin-like 1            | Fmnl1 | 287746 | 1,18 | down |
| 6291641 | 7072552 | 1062144 | formin-like 1            | Fmnl1 | 287746 | 1,43 | up   |
| 6434900 | 7072552 | 1062132 | formin-like 1            | Fmnl1 | 287746 | 1,48 | down |

|         |         |         |                                                  |       |        |      |      |
|---------|---------|---------|--------------------------------------------------|-------|--------|------|------|
| 6518816 | 7072552 | 1062135 | formin-like 1                                    | Fmnl1 | 287746 | 1,48 | up   |
| 6554047 | 7072552 | 1062136 | formin-like 1                                    | Fmnl1 | 287746 | 1,19 | down |
| 6658828 | 7072552 | 1062139 | formin-like 1                                    | Fmnl1 | 287746 | 1,93 | up   |
| 6694825 | 7072552 | 1062128 | formin-like 1                                    | Fmnl1 | 287746 | 1,62 | down |
| 6700771 | 7072552 | 1062131 | formin-like 1                                    | Fmnl1 | 287746 | 3,58 | up   |
| 6708438 | 7072552 | 1062133 | formin-like 1                                    | Fmnl1 | 287746 | 1,01 | down |
| 6716759 | 7072552 | 1062122 | formin-like 1                                    | Fmnl1 | 287746 | 1,07 | up   |
| 5642318 | 7094130 | 1112869 | forty-two-three domain containing 1              | Fytd1 | 360726 | 1,10 | down |
| 5671400 | 7094130 | 1112874 | forty-two-three domain containing 1              | Fytd1 | 360726 | 1,26 | up   |
| 5675417 | 7094130 | 1112876 | forty-two-three domain containing 1              | Fytd1 | 360726 | 1,01 | up   |
| 5811246 | 7094130 | 1112872 | forty-two-three domain containing 1              | Fytd1 | 360726 | 1,23 | down |
| 5844133 | 7094130 | 1112872 | forty-two-three domain containing 1              | Fytd1 | 360726 | 1,00 | up   |
| 5933675 | 7094130 | 1112871 | forty-two-three domain containing 1              | Fytd1 | 360726 | 1,06 | down |
| 6055036 | 7094130 | 1112870 | forty-two-three domain containing 1              | Fytd1 | 360726 | 1,06 | down |
| 6132657 | 7094130 | 1112879 | forty-two-three domain containing 1              | Fytd1 | 360726 | 1,04 | up   |
| 6164043 | 7094130 | 1112875 | forty-two-three domain containing 1              | Fytd1 | 360726 | 1,07 | up   |
| 6271979 | 7094130 | 1112877 | forty-two-three domain containing 1              | Fytd1 | 360726 | 1,46 | up   |
| 6611957 | 7094130 | 1112880 | forty-two-three domain containing 1              | Fytd1 | 360726 | 2,54 | down |
| 5705849 | 7039170 | 983431  | fos-like antigen 1                               | Fosl1 | 25445  | 1,02 | down |
| 6032279 | 7039170 | 983431  | fos-like antigen 1                               | Fosl1 | 25445  | 1,44 | down |
| 6079701 | 7039170 | 983434  | fos-like antigen 1                               | Fosl1 | 25445  | 1,49 | down |
| 6253648 | 7039170 | 983434  | fos-like antigen 1                               | Fosl1 | 25445  | 1,03 | up   |
| 6296092 | 7039170 | 983433  | fos-like antigen 1                               | Fosl1 | 25445  | 1,05 | down |
| 6508220 | 7039170 | 983435  | fos-like antigen 1                               | Fosl1 | 25445  | 1,35 | up   |
| 6657406 | 7039170 | 983434  | fos-like antigen 1                               | Fosl1 | 25445  | 2,15 | up   |
| 6661828 | 7039170 | 983434  | fos-like antigen 1                               | Fosl1 | 25445  | 4,20 | up   |
| 6734738 | 7039170 | 983432  | fos-like antigen 1                               | Fosl1 | 25445  | 1,31 | up   |
| 6031133 | 7373633 | 1805695 | Ftsj homolog 1 (E. coli)                         | Ftsj1 | 363450 | 1,05 | up   |
| 5656211 | 7280588 | 1574144 | fucosidase, alpha-L- 1, tissue                   | Fuca1 | 24375  | 1,06 | up   |
| 5828024 | 7280588 | 1574148 | fucosidase, alpha-L- 1, tissue                   | Fuca1 | 24375  | 1,22 | up   |
| 5906839 | 7280588 | 1574145 | fucosidase, alpha-L- 1, tissue                   | Fuca1 | 24375  | 1,05 | down |
| 5991528 | 7280588 | 1574151 | fucosidase, alpha-L- 1, tissue                   | Fuca1 | 24375  | 1,16 | down |
| 6016254 | 7280588 | 1574144 | fucosidase, alpha-L- 1, tissue                   | Fuca1 | 24375  | 2,19 | up   |
| 6033582 | 7280588 | 1574147 | fucosidase, alpha-L- 1, tissue                   | Fuca1 | 24375  | 1,27 | down |
| 6149753 | 7280588 | 1574152 | fucosidase, alpha-L- 1, tissue                   | Fuca1 | 24375  | 1,13 | up   |
| 6183854 | 7280588 | 1574149 | fucosidase, alpha-L- 1, tissue                   | Fuca1 | 24375  | 1,15 | down |
| 6632337 | 7280588 | 1574146 | fucosidase, alpha-L- 1, tissue                   | Fuca1 | 24375  | 1,27 | up   |
| 6717916 | 7280588 | 1574150 | fucosidase, alpha-L- 1, tissue                   | Fuca1 | 24375  | 1,10 | down |
| 5679089 | 7275208 | 1560486 | fukutin                                          | Fktn  | 362520 | 1,78 | down |
| 5750610 | 7275208 | 1560482 | fukutin                                          | Fktn  | 362520 | 1,23 | up   |
| 5888041 | 7275208 | 1560486 | fukutin                                          | Fktn  | 362520 | 1,56 | down |
| 5921645 | 7275208 | 1560481 | fukutin                                          | Fktn  | 362520 | 1,12 | up   |
| 6108968 | 7275208 | 1560488 | fukutin                                          | Fktn  | 362520 | 1,17 | down |
| 6225396 | 7275208 | 1560485 | fukutin                                          | Fktn  | 362520 | 1,17 | down |
| 6233255 | 7275208 | 1560477 | fukutin                                          | Fktn  | 362520 | 1,43 | up   |
| 6279971 | 7275208 | 1560487 | fukutin                                          | Fktn  | 362520 | 1,07 | up   |
| 6458660 | 7275208 | 1560494 | fukutin                                          | Fktn  | 362520 | 1,04 | down |
| 6503576 | 7275208 | 1560495 | fukutin                                          | Fktn  | 362520 | 1,05 | up   |
| 6516356 | 7275208 | 1560489 | fukutin                                          | Fktn  | 362520 | 1,01 | down |
| 6538269 | 7275208 | 1560494 | fukutin                                          | Fktn  | 362520 | 1,13 | down |
| 6542994 | 7275208 | 1560495 | fukutin                                          | Fktn  | 362520 | 1,16 | down |
| 6567207 | 7275208 | 1560478 | fukutin                                          | Fktn  | 362520 | 2,35 | up   |
| 6620265 | 7275208 | 1560483 | fukutin                                          | Fktn  | 362520 | 1,25 | down |
| 6658080 | 7275208 | 1560481 | fukutin                                          | Fktn  | 362520 | 1,10 | up   |
| 5732927 | 7268847 | 1544536 | FXYP domain-containing ion transport regulator 4 | Fxyd4 | 64190  | 1,06 | up   |
| 5735516 | 7268847 | 1544531 | FXYP domain-containing ion transport regulator 4 | Fxyd4 | 64190  | 1,37 | up   |



|         |         |         |                                                  |         |        |      |      |
|---------|---------|---------|--------------------------------------------------|---------|--------|------|------|
| 5820839 | 7268847 | 1544535 | FXYD domain-containing ion transport regulator 4 | Fxyd4   | 64190  | 2,03 | down |
| 5870183 | 7268847 | 1544533 | FXYD domain-containing ion transport regulator 4 | Fxyd4   | 64190  | 2,13 | up   |
| 5876184 | 7268847 | 1544533 | FXYD domain-containing ion transport regulator 4 | Fxyd4   | 64190  | 1,19 | down |
| 6099813 | 7268847 | 1544532 | FXYD domain-containing ion transport regulator 4 | Fxyd4   | 64190  | 1,32 | up   |
| 6104900 | 7268847 | 1544530 | FXYD domain-containing ion transport regulator 4 | Fxyd4   | 64190  | 1,00 | down |
| 6157414 | 7268847 | 1544535 | FXYD domain-containing ion transport regulator 4 | Fxyd4   | 64190  | 1,63 | down |
| 6312149 | 7268847 | 1544536 | FXYD domain-containing ion transport regulator 4 | Fxyd4   | 64190  | 1,31 | up   |
| 6425049 | 7268847 | 1544534 | FXYD domain-containing ion transport regulator 4 | Fxyd4   | 64190  | 1,03 | down |
| 6526264 | 7268847 | 1544535 | FXYD domain-containing ion transport regulator 4 | Fxyd4   | 64190  | 1,04 | down |
| 5624408 | 7217321 | 1416037 | FYVE, RhoGEF and PH domain containing 2          | Fgd2    | 309653 | 1,11 | down |
| 5644734 | 7217321 | 1416040 | FYVE, RhoGEF and PH domain containing 2          | Fgd2    | 309653 | 1,20 | down |
| 5717846 | 7217321 | 1416030 | FYVE, RhoGEF and PH domain containing 2          | Fgd2    | 309653 | 1,12 | down |
| 5726955 | 7217321 | 1416038 | FYVE, RhoGEF and PH domain containing 2          | Fgd2    | 309653 | 1,63 | down |
| 5766672 | 7217321 | 1416033 | FYVE, RhoGEF and PH domain containing 2          | Fgd2    | 309653 | 1,25 | up   |
| 5781330 | 7217321 | 1416042 | FYVE, RhoGEF and PH domain containing 2          | Fgd2    | 309653 | 1,08 | down |
| 5902901 | 7217321 | 1416034 | FYVE, RhoGEF and PH domain containing 2          | Fgd2    | 309653 | 1,42 | up   |
| 5964197 | 7217321 | 1416035 | FYVE, RhoGEF and PH domain containing 2          | Fgd2    | 309653 | 1,41 | down |
| 5970616 | 7217321 | 1416041 | FYVE, RhoGEF and PH domain containing 2          | Fgd2    | 309653 | 1,07 | up   |
| 6147318 | 7217321 | 1416027 | FYVE, RhoGEF and PH domain containing 2          | Fgd2    | 309653 | 1,19 | down |
| 6193110 | 7217321 | 1416039 | FYVE, RhoGEF and PH domain containing 2          | Fgd2    | 309653 | 2,43 | down |
| 6258182 | 7217321 | 1416026 | FYVE, RhoGEF and PH domain containing 2          | Fgd2    | 309653 | 1,54 | up   |
| 6347867 | 7217321 | 1416025 | FYVE, RhoGEF and PH domain containing 2          | Fgd2    | 309653 | 1,02 | down |
| 6358971 | 7217321 | 1416032 | FYVE, RhoGEF and PH domain containing 2          | Fgd2    | 309653 | 1,28 | up   |
| 6411528 | 7217321 | 1416026 | FYVE, RhoGEF and PH domain containing 2          | Fgd2    | 309653 | 1,10 | down |
| 6483978 | 7217321 | 1416036 | FYVE, RhoGEF and PH domain containing 2          | Fgd2    | 309653 | 1,63 | down |
| 6668470 | 7217321 | 1416041 | FYVE, RhoGEF and PH domain containing 2          | Fgd2    | 309653 | 1,70 | up   |
| 6670619 | 7217321 | 1416029 | FYVE, RhoGEF and PH domain containing 2          | Fgd2    | 309653 | 2,02 | up   |
| 6717658 | 7217321 | 1416031 | FYVE, RhoGEF and PH domain containing 2          | Fgd2    | 309653 | 1,23 | down |
| 5638393 | 7188685 | 1346313 | G elongation factor, mitochondrial 2             | Gfm2    | 294672 | 1,26 | up   |
| 5654302 | 7188685 | 1346308 | G elongation factor, mitochondrial 2             | Gfm2    | 294672 | 1,16 | up   |
| 5683137 | 7188685 | 1346319 | G elongation factor, mitochondrial 2             | Gfm2    | 294672 | 1,13 | down |
| 5765245 | 7188685 | 1346311 | G elongation factor, mitochondrial 2             | Gfm2    | 294672 | 1,26 | down |
| 5772814 | 7188685 | 1346318 | G elongation factor, mitochondrial 2             | Gfm2    | 294672 | 1,28 | up   |
| 5800638 | 7188685 | 1346321 | G elongation factor, mitochondrial 2             | Gfm2    | 294672 | 1,02 | up   |
| 5829345 | 7188685 | 1346327 | G elongation factor, mitochondrial 2             | Gfm2    | 294672 | 1,68 | down |
| 6021656 | 7188685 | 1346324 | G elongation factor, mitochondrial 2             | Gfm2    | 294672 | 1,24 | down |
| 6062412 | 7188685 | 1346320 | G elongation factor, mitochondrial 2             | Gfm2    | 294672 | 1,02 | down |
| 6175152 | 7188685 | 1346314 | G elongation factor, mitochondrial 2             | Gfm2    | 294672 | 1,11 | down |
| 6206977 | 7188685 | 1346305 | G elongation factor, mitochondrial 2             | Gfm2    | 294672 | 1,54 | up   |
| 6227605 | 7188685 | 1346326 | G elongation factor, mitochondrial 2             | Gfm2    | 294672 | 1,17 | down |
| 6304955 | 7188685 | 1346306 | G elongation factor, mitochondrial 2             | Gfm2    | 294672 | 1,07 | up   |
| 6314795 | 7188685 | 1346312 | G elongation factor, mitochondrial 2             | Gfm2    | 294672 | 1,14 | up   |
| 6319871 | 7188685 | 1346327 | G elongation factor, mitochondrial 2             | Gfm2    | 294672 | 1,26 | down |
| 6322562 | 7188685 | 1346323 | G elongation factor, mitochondrial 2             | Gfm2    | 294672 | 1,10 | up   |
| 6370427 | 7188685 | 1346310 | G elongation factor, mitochondrial 2             | Gfm2    | 294672 | 1,18 | down |
| 6377541 | 7188685 | 1346307 | G elongation factor, mitochondrial 2             | Gfm2    | 294672 | 1,04 | down |
| 6632173 | 7188685 | 1346331 | G elongation factor, mitochondrial 2             | Gfm2    | 294672 | 1,66 | down |
| 6658477 | 7188685 | 1346316 | G elongation factor, mitochondrial 2             | Gfm2    | 294672 | 1,13 | down |
| 6686633 | 7188685 | 1346332 | G elongation factor, mitochondrial 2             | Gfm2    | 294672 | 1,12 | down |
| 6737629 | 7188685 | 1346332 | G elongation factor, mitochondrial 2             | Gfm2    | 294672 | 1,17 | down |
| 5776477 | 7196024 | 1365589 | G patch domain containing 4                      | Gpatch4 | 295228 | 1,24 | down |
| 6012329 | 7196024 | 1365589 | G patch domain containing 4                      | Gpatch4 | 295228 | 1,28 | down |
| 6041260 | 7196024 | 1365591 | G patch domain containing 4                      | Gpatch4 | 295228 | 1,96 | up   |
| 6132478 | 7196024 | 1365593 | G patch domain containing 4                      | Gpatch4 | 295228 | 2,31 | up   |
| 6147675 | 7196024 | 1365595 | G patch domain containing 4                      | Gpatch4 | 295228 | 1,77 | down |
| 6386597 | 7196024 | 1365596 | G patch domain containing 4                      | Gpatch4 | 295228 | 1,04 | up   |

|         |         |         |                                                         |         |        |      |      |
|---------|---------|---------|---------------------------------------------------------|---------|--------|------|------|
| 6449118 | 7196024 | 1365594 | G patch domain containing 4                             | Gpatch4 | 295228 | 1,45 | down |
| 6630351 | 7196024 | 1365592 | G patch domain containing 4                             | Gpatch4 | 295228 | 1,10 | up   |
| 6683254 | 7196024 | 1365590 | G patch domain containing 4                             | Gpatch4 | 295228 | 1,57 | up   |
| 6710486 | 7196024 | 1365595 | G patch domain containing 4                             | Gpatch4 | 295228 | 1,10 | down |
| 6724827 | 7196024 | 1365595 | G patch domain containing 4                             | Gpatch4 | 295228 | 1,02 | down |
| 5643706 | 7371643 | 1800649 | G protein-coupled receptor 108                          | Gpr108  | 316136 | 1,15 | down |
| 5691044 | 7371643 | 1800642 | G protein-coupled receptor 108                          | Gpr108  | 316136 | 1,06 | up   |
| 5769136 | 7371643 | 1800642 | G protein-coupled receptor 108                          | Gpr108  | 316136 | 1,03 | up   |
| 5785942 | 7371643 | 1800650 | G protein-coupled receptor 108                          | Gpr108  | 316136 | 1,18 | up   |
| 5792921 | 7371643 | 1800656 | G protein-coupled receptor 108                          | Gpr108  | 316136 | 1,02 | down |
| 5813374 | 7371643 | 1800649 | G protein-coupled receptor 108                          | Gpr108  | 316136 | 1,00 | up   |
| 5902228 | 7371643 | 1800643 | G protein-coupled receptor 108                          | Gpr108  | 316136 | 1,56 | down |
| 5963266 | 7371643 | 1800652 | G protein-coupled receptor 108                          | Gpr108  | 316136 | 1,04 | down |
| 5964648 | 7371643 | 1800646 | G protein-coupled receptor 108                          | Gpr108  | 316136 | 1,23 | down |
| 5994949 | 7371643 | 1800648 | G protein-coupled receptor 108                          | Gpr108  | 316136 | 1,45 | up   |
| 6200235 | 7371643 | 1800653 | G protein-coupled receptor 108                          | Gpr108  | 316136 | 1,03 | up   |
| 6331556 | 7371643 | 1800654 | G protein-coupled receptor 108                          | Gpr108  | 316136 | 1,05 | down |
| 6343077 | 7371643 | 1800651 | G protein-coupled receptor 108                          | Gpr108  | 316136 | 1,13 | up   |
| 6372586 | 7371643 | 1800652 | G protein-coupled receptor 108                          | Gpr108  | 316136 | 1,06 | up   |
| 6535802 | 7371643 | 1800655 | G protein-coupled receptor 108                          | Gpr108  | 316136 | 1,08 | down |
| 6561488 | 7371643 | 1800644 | G protein-coupled receptor 108                          | Gpr108  | 316136 | 1,13 | down |
| 6698217 | 7371643 | 1800645 | G protein-coupled receptor 108                          | Gpr108  | 316136 | 1,11 | up   |
| 6703535 | 7371643 | 1800657 | G protein-coupled receptor 108                          | Gpr108  | 316136 | 1,02 | up   |
| 5722262 | 7384075 | 1829480 | G protein-coupled receptor 119                          | Gpr119  | 302813 | 1,39 | down |
| 5786660 | 7384075 | 1829479 | G protein-coupled receptor 119                          | Gpr119  | 302813 | 1,33 | up   |
| 6281684 | 7384075 | 1829478 | G protein-coupled receptor 119                          | Gpr119  | 302813 | 3,10 | up   |
| 6481972 | 7384075 | 1829477 | G protein-coupled receptor 119                          | Gpr119  | 302813 | 2,06 | down |
| 6495018 | 7082098 | 1084112 | G protein-coupled receptor 179                          | Gpr179  | 287657 | 1,33 | down |
| 5759981 | 7122319 | 1183071 | G protein-coupled receptor 75                           | Gpr75   | 498434 | 1,25 | up   |
| 5789011 | 7122319 | 1183071 | G protein-coupled receptor 75                           | Gpr75   | 498434 | 1,52 | up   |
| 5942443 | 7122319 | 1183071 | G protein-coupled receptor 75                           | Gpr75   | 498434 | 1,25 | down |
| 6164228 | 7122319 | 1183071 | G protein-coupled receptor 75                           | Gpr75   | 498434 | 1,17 | down |
| 6611858 | 7122319 | 1183071 | G protein-coupled receptor 75                           | Gpr75   | 498434 | 1,03 | up   |
| 6617106 | 7122319 | 1183071 | G protein-coupled receptor 75                           | Gpr75   | 498434 | 1,16 | down |
| 6737925 | 7122319 | 1183072 | G protein-coupled receptor 75                           | Gpr75   | 498434 | 2,12 | down |
| 5760078 | 7385253 | 1832223 | G protein-coupled receptor associated sorting protein 1 | Gprasp1 | 171407 | 1,78 | up   |
| 5774378 | 7385253 | 1832224 | G protein-coupled receptor associated sorting protein 1 | Gprasp1 | 171407 | 1,19 | down |
| 5786036 | 7385253 | 1832224 | G protein-coupled receptor associated sorting protein 1 | Gprasp1 | 171407 | 1,27 | up   |
| 5822737 | 7385253 | 1832223 | G protein-coupled receptor associated sorting protein 1 | Gprasp1 | 171407 | 2,03 | up   |
| 5886208 | 7385253 | 1832224 | G protein-coupled receptor associated sorting protein 1 | Gprasp1 | 171407 | 1,34 | down |
| 6205883 | 7385253 | 1832223 | G protein-coupled receptor associated sorting protein 1 | Gprasp1 | 171407 | 1,67 | up   |
| 6280710 | 7385253 | 1832223 | G protein-coupled receptor associated sorting protein 1 | Gprasp1 | 171407 | 1,06 | up   |
| 6373413 | 7385253 | 1832224 | G protein-coupled receptor associated sorting protein 1 | Gprasp1 | 171407 | 1,00 | up   |
| 6402424 | 7385253 | 1832225 | G protein-coupled receptor associated sorting protein 1 | Gprasp1 | 171407 | 1,38 | up   |
| 6425736 | 7385253 | 1832224 | G protein-coupled receptor associated sorting protein 1 | Gprasp1 | 171407 | 1,48 | up   |
| 6482018 | 7385253 | 1832223 | G protein-coupled receptor associated sorting protein 1 | Gprasp1 | 171407 | 1,22 | down |
| 6674559 | 7385253 | 1832224 | G protein-coupled receptor associated sorting protein 1 | Gprasp1 | 171407 | 1,21 | down |
| 6269601 | 7155624 | 1264727 | G protein-regulated inducer of neurite outgrowth 1      | Gprin1  | 364676 | 1,25 | down |
| 5653747 | 7220647 | 1424510 | G7c protein                                             | G7c     | 309611 | 1,37 | down |
| 5693123 | 7220647 | 1424507 | G7c protein                                             | G7c     | 309611 | 2,07 | up   |
| 5706438 | 7220647 | 1424502 | G7c protein                                             | G7c     | 309611 | 1,89 | down |
| 5723169 | 7220647 | 1424512 | G7c protein                                             | G7c     | 309611 | 1,23 | up   |
| 5733625 | 7220647 | 1424508 | G7c protein                                             | G7c     | 309611 | 1,12 | up   |
| 5774969 | 7220647 | 1424515 | G7c protein                                             | G7c     | 309611 | 1,13 | down |
| 5814685 | 7220647 | 1424511 | G7c protein                                             | G7c     | 309611 | 1,13 | up   |
| 5871203 | 7220647 | 1424519 | G7c protein                                             | G7c     | 309611 | 1,99 | up   |

|         |         |         |                                                                                                        |                   |                   |      |      |
|---------|---------|---------|--------------------------------------------------------------------------------------------------------|-------------------|-------------------|------|------|
| 5912579 | 7220647 | 1424505 | G7c protein                                                                                            | G7c               | 309611            | 1,21 | up   |
| 5957186 | 7220647 | 1424518 | G7c protein                                                                                            | G7c               | 309611            | 2,15 | up   |
| 5990004 | 7220647 | 1424513 | G7c protein                                                                                            | G7c               | 309611            | 1,13 | down |
| 6096030 | 7220647 | 1424504 | G7c protein                                                                                            | G7c               | 309611            | 1,14 | down |
| 6184732 | 7220647 | 1424504 | G7c protein                                                                                            | G7c               | 309611            | 1,03 | down |
| 6371090 | 7220647 | 1424503 | G7c protein                                                                                            | G7c               | 309611            | 1,21 | down |
| 6408879 | 7220647 | 1424516 | G7c protein                                                                                            | G7c               | 309611            | 1,05 | up   |
| 6451060 | 7220647 | 1424503 | G7c protein                                                                                            | G7c               | 309611            | 1,01 | up   |
| 6568013 | 7220647 | 1424517 | G7c protein                                                                                            | G7c               | 309611            | 1,30 | down |
| 6679495 | 7220647 | 1424514 | G7c protein                                                                                            | G7c               | 309611            | 1,06 | down |
| 6695331 | 7220647 | 1424506 | G7c protein                                                                                            | G7c               | 309611            | 1,16 | up   |
| 6741725 | 7220647 | 1424509 | G7c protein                                                                                            | G7c               | 309611            | 1,12 | up   |
| 5693122 | 7244378 | 1484400 | GA binding protein transcription factor, beta subunit 1-like                                           | Gabpb11           | 364738            | 1,25 | down |
| 5742061 | 7244378 | 1484410 | GA binding protein transcription factor, beta subunit 1-like /// GA repeat binding jGabpb11 /// Gabpb1 | 364738 /// 499883 | 364738 /// 499883 | 1,17 | down |
| 5777150 | 7244378 | 1484413 | GA binding protein transcription factor, beta subunit 1-like /// GA repeat binding jGabpb11 /// Gabpb1 | 364738 /// 499883 | 364738 /// 499883 | 1,19 | down |
| 5803675 | 7244378 | 1484396 | GA binding protein transcription factor, beta subunit 1-like /// GA repeat binding jGabpb11 /// Gabpb1 | 364738 /// 499883 | 364738 /// 499883 | 1,13 | down |
| 5861355 | 7244378 | 1484412 | GA binding protein transcription factor, beta subunit 1-like /// GA repeat binding jGabpb11 /// Gabpb1 | 364738 /// 499883 | 364738 /// 499883 | 1,09 | up   |
| 6589589 | 7244378 | 1484411 | GA binding protein transcription factor, beta subunit 1-like /// GA repeat binding jGabpb11 /// Gabpb1 | 364738 /// 499883 | 364738 /// 499883 | 1,09 | up   |
| 6611387 | 7244378 | 1484412 | GA binding protein transcription factor, beta subunit 1-like /// GA repeat binding jGabpb11 /// Gabpb1 | 364738 /// 499883 | 364738 /// 499883 | 1,34 | up   |
| 6711314 | 7244378 | 1484405 | GA binding protein transcription factor, beta subunit 1-like /// GA repeat binding jGabpb11 /// Gabpb1 | 364738 /// 499883 | 364738 /// 499883 | 1,94 | up   |
| 6739451 | 7244378 | 1484409 | GA binding protein transcription factor, beta subunit 1-like /// GA repeat binding jGabpb11 /// Gabpb1 | 364738 /// 499883 | 364738 /// 499883 | 1,15 | up   |
| 5676676 | 7244378 | 1484416 | GA repeat binding protein, beta 1                                                                      | Gabpb1            | 499883            | 1,24 | down |
| 5991467 | 7244378 | 1484396 | GA repeat binding protein, beta 1                                                                      | Gabpb1            | 499883            | 2,10 | down |
| 5673695 | 7274318 | 1558302 | galactose-1-phosphate uridylyltransferase                                                              | Galt              | 298003            | 1,12 | down |
| 5908974 | 7274318 | 1558297 | galactose-1-phosphate uridylyltransferase                                                              | Galt              | 298003            | 1,10 | down |
| 5940966 | 7274318 | 1558304 | galactose-1-phosphate uridylyltransferase                                                              | Galt              | 298003            | 1,06 | up   |
| 6087838 | 7274318 | 1558301 | galactose-1-phosphate uridylyltransferase                                                              | Galt              | 298003            | 1,02 | up   |
| 6088285 | 7274318 | 1558298 | galactose-1-phosphate uridylyltransferase                                                              | Galt              | 298003            | 1,13 | down |
| 6289000 | 7274318 | 1558294 | galactose-1-phosphate uridylyltransferase                                                              | Galt              | 298003            | 1,19 | up   |
| 6395842 | 7274318 | 1558294 | galactose-1-phosphate uridylyltransferase                                                              | Galt              | 298003            | 1,26 | down |
| 6416830 | 7274318 | 1558303 | galactose-1-phosphate uridylyltransferase                                                              | Galt              | 298003            | 1,18 | down |
| 6506021 | 7274318 | 1558300 | galactose-1-phosphate uridylyltransferase                                                              | Galt              | 298003            | 2,62 | up   |
| 6550991 | 7274318 | 1558295 | galactose-1-phosphate uridylyltransferase                                                              | Galt              | 298003            | 1,09 | down |
| 6553684 | 7274318 | 1558296 | galactose-1-phosphate uridylyltransferase                                                              | Galt              | 298003            | 1,38 | up   |
| 6688154 | 7274318 | 1558299 | galactose-1-phosphate uridylyltransferase                                                              | Galt              | 298003            | 1,63 | up   |
| 6725906 | 7274318 | 1558304 | galactose-1-phosphate uridylyltransferase                                                              | Galt              | 298003            | 1,01 | down |
| 5700151 | 7341002 | 1722545 | galactosidase, beta 1                                                                                  | Glb1              | 316033            | 1,52 | down |
| 5755127 | 7341002 | 1722561 | galactosidase, beta 1                                                                                  | Glb1              | 316033            | 1,37 | down |
| 5756538 | 7341002 | 1722539 | galactosidase, beta 1                                                                                  | Glb1              | 316033            | 2,09 | down |
| 5793819 | 7341002 | 1722561 | galactosidase, beta 1                                                                                  | Glb1              | 316033            | 1,88 | down |
| 5829336 | 7341002 | 1722538 | galactosidase, beta 1                                                                                  | Glb1              | 316033            | 1,03 | down |
| 5846373 | 7341002 | 1722543 | galactosidase, beta 1                                                                                  | Glb1              | 316033            | 1,58 | down |
| 5907261 | 7341002 | 1722550 | galactosidase, beta 1                                                                                  | Glb1              | 316033            | 1,56 | down |
| 5964907 | 7341002 | 1722553 | galactosidase, beta 1                                                                                  | Glb1              | 316033            | 2,00 | down |
| 6025629 | 7341002 | 1722551 | galactosidase, beta 1                                                                                  | Glb1              | 316033            | 1,80 | down |
| 6045846 | 7341002 | 1722530 | galactosidase, beta 1                                                                                  | Glb1              | 316033            | 1,23 | up   |
| 6051756 | 7341002 | 1722540 | galactosidase, beta 1                                                                                  | Glb1              | 316033            | 1,37 | down |
| 6060718 | 7341002 | 1722537 | galactosidase, beta 1                                                                                  | Glb1              | 316033            | 1,31 | down |
| 6092617 | 7341002 | 1722561 | galactosidase, beta 1                                                                                  | Glb1              | 316033            | 1,72 | up   |
| 6256956 | 7341002 | 1722541 | galactosidase, beta 1                                                                                  | Glb1              | 316033            | 1,75 | down |
| 6297843 | 7341002 | 1722530 | galactosidase, beta 1                                                                                  | Glb1              | 316033            | 1,17 | up   |
| 6489721 | 7341002 | 1722554 | galactosidase, beta 1                                                                                  | Glb1              | 316033            | 1,68 | down |
| 6670820 | 7341002 | 1722555 | galactosidase, beta 1                                                                                  | Glb1              | 316033            | 2,15 | down |
| 6687603 | 7341002 | 1722546 | galactosidase, beta 1                                                                                  | Glb1              | 316033            | 1,32 | down |
| 6717300 | 7341002 | 1722544 | galactosidase, beta 1                                                                                  | Glb1              | 316033            | 1,78 | down |
| 5633044 | 7363922 | 1778869 | galactosidase, beta 1-like                                                                             | Glb11             | 301525            | 1,34 | down |

|         |         |         |                                                   |        |        |      |      |
|---------|---------|---------|---------------------------------------------------|--------|--------|------|------|
| 5751956 | 7363922 | 1778859 | galactosidase, beta 1-like                        | Glb11  | 301525 | 1,68 | down |
| 5783964 | 7363922 | 1778856 | galactosidase, beta 1-like                        | Glb11  | 301525 | 1,38 | down |
| 5817659 | 7363922 | 1778867 | galactosidase, beta 1-like                        | Glb11  | 301525 | 1,21 | down |
| 6077121 | 7363922 | 1778868 | galactosidase, beta 1-like                        | Glb11  | 301525 | 1,15 | down |
| 6102427 | 7363922 | 1778864 | galactosidase, beta 1-like                        | Glb11  | 301525 | 1,19 | down |
| 6160003 | 7363922 | 1778863 | galactosidase, beta 1-like                        | Glb11  | 301525 | 1,03 | up   |
| 6219722 | 7363922 | 1778866 | galactosidase, beta 1-like                        | Glb11  | 301525 | 1,09 | down |
| 6231005 | 7363922 | 1778865 | galactosidase, beta 1-like                        | Glb11  | 301525 | 1,01 | down |
| 6289873 | 7363922 | 1778870 | galactosidase, beta 1-like                        | Glb11  | 301525 | 1,20 | down |
| 6334102 | 7363922 | 1778860 | galactosidase, beta 1-like                        | Glb11  | 301525 | 1,04 | down |
| 6396655 | 7363922 | 1778858 | galactosidase, beta 1-like                        | Glb11  | 301525 | 1,04 | up   |
| 6462365 | 7363922 | 1778871 | galactosidase, beta 1-like                        | Glb11  | 301525 | 1,22 | up   |
| 6518282 | 7363922 | 1778867 | galactosidase, beta 1-like                        | Glb11  | 301525 | 1,53 | up   |
| 6584530 | 7363922 | 1778868 | galactosidase, beta 1-like                        | Glb11  | 301525 | 1,02 | down |
| 6631597 | 7363922 | 1778857 | galactosidase, beta 1-like                        | Glb11  | 301525 | 1,58 | down |
| 6680994 | 7363922 | 1778861 | galactosidase, beta 1-like                        | Glb11  | 301525 | 1,37 | down |
| 6712577 | 7363922 | 1778860 | galactosidase, beta 1-like                        | Glb11  | 301525 | 2,82 | down |
| 6734778 | 7363922 | 1778870 | galactosidase, beta 1-like                        | Glb11  | 301525 | 1,06 | down |
| 5628320 | 7332322 | 1701219 | gametocyte specific factor 1                      | Gtsf1  | 315347 | 1,08 | down |
| 5629145 | 7332322 | 1701220 | gametocyte specific factor 1                      | Gtsf1  | 315347 | 1,01 | down |
| 5883702 | 7332322 | 1701222 | gametocyte specific factor 1                      | Gtsf1  | 315347 | 1,02 | up   |
| 5986281 | 7332322 | 1701223 | gametocyte specific factor 1                      | Gtsf1  | 315347 | 2,85 | up   |
| 6027252 | 7332322 | 1701228 | gametocyte specific factor 1                      | Gtsf1  | 315347 | 1,02 | down |
| 6094225 | 7332322 | 1701225 | gametocyte specific factor 1                      | Gtsf1  | 315347 | 1,19 | up   |
| 6230065 | 7332322 | 1701221 | gametocyte specific factor 1                      | Gtsf1  | 315347 | 1,03 | up   |
| 6486325 | 7332322 | 1701224 | gametocyte specific factor 1                      | Gtsf1  | 315347 | 1,12 | down |
| 6550652 | 7332322 | 1701227 | gametocyte specific factor 1                      | Gtsf1  | 315347 | 1,26 | down |
| 5664093 | 7030254 | 961218  | gametogenetin                                     | Ggn    | 292765 | 2,51 | down |
| 5699732 | 7030254 | 961218  | gametogenetin                                     | Ggn    | 292765 | 1,05 | up   |
| 5787105 | 7030254 | 961218  | gametogenetin                                     | Ggn    | 292765 | 1,24 | up   |
| 5815162 | 7030254 | 961220  | gametogenetin                                     | Ggn    | 292765 | 1,02 | down |
| 5863101 | 7030254 | 961217  | gametogenetin                                     | Ggn    | 292765 | 1,40 | down |
| 5900460 | 7030254 | 961218  | gametogenetin                                     | Ggn    | 292765 | 1,11 | up   |
| 6042674 | 7030254 | 961221  | gametogenetin                                     | Ggn    | 292765 | 1,05 | down |
| 6123053 | 7030254 | 961219  | gametogenetin                                     | Ggn    | 292765 | 1,00 | up   |
| 6457945 | 7030254 | 961218  | gametogenetin                                     | Ggn    | 292765 | 1,54 | up   |
| 5724715 | 7080875 | 1081324 | gametogenetin binding protein 2                   | Ggnbp2 | 360584 | 1,00 | down |
| 5797321 | 7080875 | 1081312 | gametogenetin binding protein 2                   | Ggnbp2 | 360584 | 1,01 | up   |
| 5806218 | 7080875 | 1081322 | gametogenetin binding protein 2                   | Ggnbp2 | 360584 | 1,16 | up   |
| 5913005 | 7080875 | 1081320 | gametogenetin binding protein 2                   | Ggnbp2 | 360584 | 1,03 | up   |
| 5967459 | 7080875 | 1081324 | gametogenetin binding protein 2                   | Ggnbp2 | 360584 | 1,02 | up   |
| 6062181 | 7080875 | 1081315 | gametogenetin binding protein 2                   | Ggnbp2 | 360584 | 1,31 | up   |
| 6094443 | 7080875 | 1081314 | gametogenetin binding protein 2                   | Ggnbp2 | 360584 | 1,44 | down |
| 6117486 | 7080875 | 1081322 | gametogenetin binding protein 2                   | Ggnbp2 | 360584 | 1,48 | up   |
| 6309605 | 7080875 | 1081313 | gametogenetin binding protein 2                   | Ggnbp2 | 360584 | 2,08 | up   |
| 6421233 | 7080875 | 1081321 | gametogenetin binding protein 2                   | Ggnbp2 | 360584 | 1,26 | down |
| 6441910 | 7080875 | 1081317 | gametogenetin binding protein 2                   | Ggnbp2 | 360584 | 1,11 | up   |
| 6445540 | 7080875 | 1081319 | gametogenetin binding protein 2                   | Ggnbp2 | 360584 | 1,33 | down |
| 6471710 | 7080875 | 1081315 | gametogenetin binding protein 2                   | Ggnbp2 | 360584 | 1,17 | down |
| 6485970 | 7080875 | 1081318 | gametogenetin binding protein 2                   | Ggnbp2 | 360584 | 1,04 | up   |
| 6502725 | 7080875 | 1081311 | gametogenetin binding protein 2                   | Ggnbp2 | 360584 | 1,97 | down |
| 6517415 | 7080875 | 1081323 | gametogenetin binding protein 2                   | Ggnbp2 | 360584 | 1,31 | up   |
| 6527857 | 7080875 | 1081316 | gametogenetin binding protein 2                   | Ggnbp2 | 360584 | 1,21 | up   |
| 5661316 | 7125168 | 1189618 | gamma-aminobutyric acid (GABA) A receptor, beta 1 | Gabbr1 | 25450  | 1,19 | down |
| 5834153 | 7125168 | 1189621 | gamma-aminobutyric acid (GABA) A receptor, beta 1 | Gabbr1 | 25450  | 2,16 | up   |
| 5846179 | 7125168 | 1189623 | gamma-aminobutyric acid (GABA) A receptor, beta 1 | Gabbr1 | 25450  | 1,31 | up   |

|         |         |         |                                                    |        |        |      |      |
|---------|---------|---------|----------------------------------------------------|--------|--------|------|------|
| 5879699 | 7125168 | 1189625 | gamma-aminobutyric acid (GABA) A receptor, beta 1  | Gabrb1 | 25450  | 1,12 | up   |
| 6095665 | 7125168 | 1189621 | gamma-aminobutyric acid (GABA) A receptor, beta 1  | Gabrb1 | 25450  | 1,48 | up   |
| 6097062 | 7125168 | 1189616 | gamma-aminobutyric acid (GABA) A receptor, beta 1  | Gabrb1 | 25450  | 1,02 | down |
| 6255876 | 7125168 | 1189622 | gamma-aminobutyric acid (GABA) A receptor, beta 1  | Gabrb1 | 25450  | 1,23 | down |
| 6329720 | 7125168 | 1189620 | gamma-aminobutyric acid (GABA) A receptor, beta 1  | Gabrb1 | 25450  | 1,17 | up   |
| 6346087 | 7125168 | 1189624 | gamma-aminobutyric acid (GABA) A receptor, beta 1  | Gabrb1 | 25450  | 1,05 | down |
| 6369146 | 7125168 | 1189616 | gamma-aminobutyric acid (GABA) A receptor, beta 1  | Gabrb1 | 25450  | 1,27 | down |
| 6604306 | 7125168 | 1189616 | gamma-aminobutyric acid (GABA) A receptor, beta 1  | Gabrb1 | 25450  | 1,08 | down |
| 6627168 | 7125168 | 1189617 | gamma-aminobutyric acid (GABA) A receptor, beta 1  | Gabrb1 | 25450  | 1,93 | up   |
| 6711601 | 7125168 | 1189619 | gamma-aminobutyric acid (GABA) A receptor, beta 1  | Gabrb1 | 25450  | 1,09 | up   |
| 5658300 | 7293733 | 1605624 | gamma-aminobutyric acid (GABA) A receptor, delta   | Gabrd  | 29689  | 1,00 | down |
| 5667714 | 7293733 | 1605628 | gamma-aminobutyric acid (GABA) A receptor, delta   | Gabrd  | 29689  | 1,19 | up   |
| 5674041 | 7293733 | 1605630 | gamma-aminobutyric acid (GABA) A receptor, delta   | Gabrd  | 29689  | 1,15 | up   |
| 5715536 | 7293733 | 1605623 | gamma-aminobutyric acid (GABA) A receptor, delta   | Gabrd  | 29689  | 1,06 | up   |
| 5720989 | 7293733 | 1605623 | gamma-aminobutyric acid (GABA) A receptor, delta   | Gabrd  | 29689  | 1,09 | up   |
| 5802172 | 7293733 | 1605627 | gamma-aminobutyric acid (GABA) A receptor, delta   | Gabrd  | 29689  | 1,24 | down |
| 5972136 | 7293733 | 1605621 | gamma-aminobutyric acid (GABA) A receptor, delta   | Gabrd  | 29689  | 1,01 | up   |
| 6032501 | 7293733 | 1605622 | gamma-aminobutyric acid (GABA) A receptor, delta   | Gabrd  | 29689  | 1,32 | down |
| 6157576 | 7293733 | 1605626 | gamma-aminobutyric acid (GABA) A receptor, delta   | Gabrd  | 29689  | 1,38 | down |
| 6234726 | 7293733 | 1605629 | gamma-aminobutyric acid (GABA) A receptor, delta   | Gabrd  | 29689  | 2,19 | up   |
| 6386346 | 7293733 | 1605621 | gamma-aminobutyric acid (GABA) A receptor, delta   | Gabrd  | 29689  | 1,11 | up   |
| 6525294 | 7293733 | 1605625 | gamma-aminobutyric acid (GABA) A receptor, delta   | Gabrd  | 29689  | 1,21 | down |
| 5662269 | 7051876 | 1013504 | gamma-aminobutyric acid (GABA) A receptor, gamma 3 | Gabrg3 | 79211  | 1,07 | down |
| 5732012 | 7051876 | 1013514 | gamma-aminobutyric acid (GABA) A receptor, gamma 3 | Gabrg3 | 79211  | 3,25 | down |
| 5734042 | 7051876 | 1013506 | gamma-aminobutyric acid (GABA) A receptor, gamma 3 | Gabrg3 | 79211  | 1,46 | up   |
| 5782600 | 7051876 | 1013509 | gamma-aminobutyric acid (GABA) A receptor, gamma 3 | Gabrg3 | 79211  | 1,25 | down |
| 5983896 | 7051876 | 1013512 | gamma-aminobutyric acid (GABA) A receptor, gamma 3 | Gabrg3 | 79211  | 1,70 | up   |
| 6100312 | 7051876 | 1013514 | gamma-aminobutyric acid (GABA) A receptor, gamma 3 | Gabrg3 | 79211  | 1,25 | down |
| 6180890 | 7051876 | 1013505 | gamma-aminobutyric acid (GABA) A receptor, gamma 3 | Gabrg3 | 79211  | 1,59 | down |
| 6192790 | 7051876 | 1013511 | gamma-aminobutyric acid (GABA) A receptor, gamma 3 | Gabrg3 | 79211  | 1,22 | up   |
| 6241349 | 7051876 | 1013511 | gamma-aminobutyric acid (GABA) A receptor, gamma 3 | Gabrg3 | 79211  | 1,98 | up   |
| 6243187 | 7051876 | 1013507 | gamma-aminobutyric acid (GABA) A receptor, gamma 3 | Gabrg3 | 79211  | 1,42 | up   |
| 6387751 | 7051876 | 1013514 | gamma-aminobutyric acid (GABA) A receptor, gamma 3 | Gabrg3 | 79211  | 1,43 | down |
| 6492128 | 7051876 | 1013513 | gamma-aminobutyric acid (GABA) A receptor, gamma 3 | Gabrg3 | 79211  | 1,00 | up   |
| 6571134 | 7051876 | 1013508 | gamma-aminobutyric acid (GABA) A receptor, gamma 3 | Gabrg3 | 79211  | 1,15 | up   |
| 6587785 | 7051876 | 1013510 | gamma-aminobutyric acid (GABA) A receptor, gamma 3 | Gabrg3 | 79211  | 1,60 | down |
| 5619034 | 7076105 | 1070721 | gamma-aminobutyric acid (GABA-A) receptor, pi      | Gabrp  | 81658  | 2,40 | down |
| 5711929 | 7076105 | 1070716 | gamma-aminobutyric acid (GABA-A) receptor, pi      | Gabrp  | 81658  | 1,02 | down |
| 5974727 | 7076105 | 1070717 | gamma-aminobutyric acid (GABA-A) receptor, pi      | Gabrp  | 81658  | 1,10 | up   |
| 6242460 | 7076105 | 1070716 | gamma-aminobutyric acid (GABA-A) receptor, pi      | Gabrp  | 81658  | 1,01 | down |
| 6421021 | 7076105 | 1070720 | gamma-aminobutyric acid (GABA-A) receptor, pi      | Gabrp  | 81658  | 1,05 | up   |
| 6449782 | 7076105 | 1070719 | gamma-aminobutyric acid (GABA-A) receptor, pi      | Gabrp  | 81658  | 1,59 | up   |
| 6632492 | 7076105 | 1070722 | gamma-aminobutyric acid (GABA-A) receptor, pi      | Gabrp  | 81658  | 1,00 | up   |
| 6667991 | 7076105 | 1070718 | gamma-aminobutyric acid (GABA-A) receptor, pi      | Gabrp  | 81658  | 1,00 | up   |
| 5629658 | 7246964 | 1489988 | gamma-glutamyltransferase 7                        | Ggt7   | 156275 | 1,00 | down |
| 5694388 | 7246964 | 1489991 | gamma-glutamyltransferase 7                        | Ggt7   | 156275 | 1,18 | down |
| 5753085 | 7246964 | 1490001 | gamma-glutamyltransferase 7                        | Ggt7   | 156275 | 1,08 | up   |
| 5772519 | 7246964 | 1489999 | gamma-glutamyltransferase 7                        | Ggt7   | 156275 | 1,08 | up   |
| 5791668 | 7246964 | 1489992 | gamma-glutamyltransferase 7                        | Ggt7   | 156275 | 1,48 | up   |
| 5815322 | 7246964 | 1489995 | gamma-glutamyltransferase 7                        | Ggt7   | 156275 | 1,02 | down |
| 5822305 | 7246964 | 1490002 | gamma-glutamyltransferase 7                        | Ggt7   | 156275 | 1,03 | up   |
| 5949440 | 7246964 | 1489994 | gamma-glutamyltransferase 7                        | Ggt7   | 156275 | 1,10 | down |
| 6129404 | 7246964 | 1489996 | gamma-glutamyltransferase 7                        | Ggt7   | 156275 | 1,03 | down |
| 6143754 | 7246964 | 1489990 | gamma-glutamyltransferase 7                        | Ggt7   | 156275 | 2,31 | up   |
| 6271807 | 7246964 | 1489998 | gamma-glutamyltransferase 7                        | Ggt7   | 156275 | 1,25 | up   |
| 6333954 | 7246964 | 1489989 | gamma-glutamyltransferase 7                        | Ggt7   | 156275 | 1,33 | down |

|         |         |         |                                                               |        |        |      |      |
|---------|---------|---------|---------------------------------------------------------------|--------|--------|------|------|
| 6455805 | 7246964 | 1489997 | gamma-glutamyltransferase 7                                   | Ggt7   | 156275 | 1,23 | down |
| 6505769 | 7246964 | 1490001 | gamma-glutamyltransferase 7                                   | Ggt7   | 156275 | 1,43 | down |
| 6668587 | 7246964 | 1489993 | gamma-glutamyltransferase 7                                   | Ggt7   | 156275 | 1,00 | down |
| 6703628 | 7246964 | 1489987 | gamma-glutamyltransferase 7                                   | Ggt7   | 156275 | 1,20 | up   |
| 6703981 | 7246964 | 1490000 | gamma-glutamyltransferase 7                                   | Ggt7   | 156275 | 1,13 | up   |
| 5825636 | 7291759 | 1600770 | Gardner-Rasheed feline sarcoma viral (v-fgr) oncogene homolog | Fgr    | 79113  | 1,01 | up   |
| 5865500 | 7291759 | 1600763 | Gardner-Rasheed feline sarcoma viral (v-fgr) oncogene homolog | Fgr    | 79113  | 1,14 | up   |
| 5950375 | 7291759 | 1600776 | Gardner-Rasheed feline sarcoma viral (v-fgr) oncogene homolog | Fgr    | 79113  | 1,58 | up   |
| 6032169 | 7291759 | 1600776 | Gardner-Rasheed feline sarcoma viral (v-fgr) oncogene homolog | Fgr    | 79113  | 1,60 | down |
| 6079031 | 7291759 | 1600764 | Gardner-Rasheed feline sarcoma viral (v-fgr) oncogene homolog | Fgr    | 79113  | 1,01 | up   |
| 6105323 | 7291759 | 1600773 | Gardner-Rasheed feline sarcoma viral (v-fgr) oncogene homolog | Fgr    | 79113  | 1,10 | down |
| 6121671 | 7291759 | 1600766 | Gardner-Rasheed feline sarcoma viral (v-fgr) oncogene homolog | Fgr    | 79113  | 1,37 | down |
| 6166434 | 7291759 | 1600772 | Gardner-Rasheed feline sarcoma viral (v-fgr) oncogene homolog | Fgr    | 79113  | 2,35 | up   |
| 6202842 | 7291759 | 1600768 | Gardner-Rasheed feline sarcoma viral (v-fgr) oncogene homolog | Fgr    | 79113  | 1,08 | down |
| 6280480 | 7291759 | 1600775 | Gardner-Rasheed feline sarcoma viral (v-fgr) oncogene homolog | Fgr    | 79113  | 1,40 | down |
| 6320088 | 7291759 | 1600767 | Gardner-Rasheed feline sarcoma viral (v-fgr) oncogene homolog | Fgr    | 79113  | 1,77 | up   |
| 6437301 | 7291759 | 1600769 | Gardner-Rasheed feline sarcoma viral (v-fgr) oncogene homolog | Fgr    | 79113  | 1,43 | down |
| 6554322 | 7291759 | 1600774 | Gardner-Rasheed feline sarcoma viral (v-fgr) oncogene homolog | Fgr    | 79113  | 1,21 | down |
| 6668915 | 7291759 | 1600765 | Gardner-Rasheed feline sarcoma viral (v-fgr) oncogene homolog | Fgr    | 79113  | 1,15 | up   |
| 6673680 | 7291759 | 1600771 | Gardner-Rasheed feline sarcoma viral (v-fgr) oncogene homolog | Fgr    | 79113  | 1,22 | down |
| 5665708 | 7071895 | 1060747 | gasdermin A1                                                  | Gsdma1 | 360619 | 1,20 | up   |
| 5771529 | 7071895 | 1060758 | gasdermin A1                                                  | Gsdma1 | 360619 | 1,28 | down |
| 5853113 | 7071895 | 1060750 | gasdermin A1                                                  | Gsdma1 | 360619 | 1,13 | down |
| 6158696 | 7071895 | 1060760 | gasdermin A1                                                  | Gsdma1 | 360619 | 1,09 | down |
| 6189067 | 7071895 | 1060749 | gasdermin A1                                                  | Gsdma1 | 360619 | 1,03 | up   |
| 6223452 | 7071895 | 1060745 | gasdermin A1                                                  | Gsdma1 | 360619 | 1,04 | down |
| 6236681 | 7071895 | 1060756 | gasdermin A1                                                  | Gsdma1 | 360619 | 1,94 | down |
| 6279509 | 7071895 | 1060762 | gasdermin A1                                                  | Gsdma1 | 360619 | 1,24 | up   |
| 6295339 | 7071895 | 1060757 | gasdermin A1                                                  | Gsdma1 | 360619 | 1,03 | down |
| 6301998 | 7071895 | 1060751 | gasdermin A1                                                  | Gsdma1 | 360619 | 1,05 | up   |
| 6326892 | 7071895 | 1060752 | gasdermin A1                                                  | Gsdma1 | 360619 | 1,08 | down |
| 6356704 | 7071895 | 1060755 | gasdermin A1                                                  | Gsdma1 | 360619 | 1,00 | down |
| 6389452 | 7071895 | 1060748 | gasdermin A1                                                  | Gsdma1 | 360619 | 1,39 | up   |
| 6423320 | 7071895 | 1060757 | gasdermin A1                                                  | Gsdma1 | 360619 | 1,03 | down |
| 6468628 | 7071895 | 1060754 | gasdermin A1                                                  | Gsdma1 | 360619 | 1,10 | down |
| 6472880 | 7071895 | 1060761 | gasdermin A1                                                  | Gsdma1 | 360619 | 2,28 | down |
| 6592787 | 7071895 | 1060757 | gasdermin A1                                                  | Gsdma1 | 360619 | 1,35 | up   |
| 6739138 | 7071895 | 1060759 | gasdermin A1                                                  | Gsdma1 | 360619 | 1,22 | down |
| 5645717 | 7318143 | 1668091 | gasdermin D                                                   | Gsdmd  | 315084 | 1,19 | up   |
| 5666782 | 7318143 | 1668093 | gasdermin D                                                   | Gsdmd  | 315084 | 1,59 | down |
| 5800586 | 7318143 | 1668094 | gasdermin D                                                   | Gsdmd  | 315084 | 1,23 | down |
| 5814642 | 7318143 | 1668089 | gasdermin D                                                   | Gsdmd  | 315084 | 1,31 | up   |
| 5842558 | 7318143 | 1668094 | gasdermin D                                                   | Gsdmd  | 315084 | 1,28 | down |
| 5888694 | 7318143 | 1668088 | gasdermin D                                                   | Gsdmd  | 315084 | 1,11 | down |
| 5951713 | 7318143 | 1668091 | gasdermin D                                                   | Gsdmd  | 315084 | 1,15 | up   |
| 6041652 | 7318143 | 1668092 | gasdermin D                                                   | Gsdmd  | 315084 | 1,18 | down |
| 6165488 | 7318143 | 1668094 | gasdermin D                                                   | Gsdmd  | 315084 | 1,00 | down |
| 6229785 | 7318143 | 1668094 | gasdermin D                                                   | Gsdmd  | 315084 | 1,14 | up   |
| 6234713 | 7318143 | 1668090 | gasdermin D                                                   | Gsdmd  | 315084 | 1,46 | up   |
| 6389438 | 7318143 | 1668091 | gasdermin D                                                   | Gsdmd  | 315084 | 1,00 | up   |
| 6570802 | 7318143 | 1668094 | gasdermin D                                                   | Gsdmd  | 315084 | 1,69 | up   |
| 6572221 | 7318143 | 1668094 | gasdermin D                                                   | Gsdmd  | 315084 | 1,29 | up   |
| 6699560 | 7318143 | 1668093 | gasdermin D                                                   | Gsdmd  | 315084 | 1,79 | up   |
| 6712542 | 7318143 | 1668094 | gasdermin D                                                   | Gsdmd  | 315084 | 1,86 | up   |
| 5706622 | 7373676 | 1805846 | GATA binding protein 1                                        | Gata1  | 25172  | 1,52 | up   |
| 5847299 | 7373676 | 1805848 | GATA binding protein 1                                        | Gata1  | 25172  | 1,31 | down |

|         |         |         |                                                 |        |        |      |      |
|---------|---------|---------|-------------------------------------------------|--------|--------|------|------|
| 5931492 | 7373676 | 1805844 | GATA binding protein 1                          | Gata1  | 25172  | 1,12 | down |
| 5941152 | 7373676 | 1805848 | GATA binding protein 1                          | Gata1  | 25172  | 1,04 | up   |
| 6063730 | 7373676 | 1805847 | GATA binding protein 1                          | Gata1  | 25172  | 2,08 | down |
| 6168836 | 7373676 | 1805848 | GATA binding protein 1                          | Gata1  | 25172  | 1,09 | down |
| 6377430 | 7373676 | 1805845 | GATA binding protein 1                          | Gata1  | 25172  | 1,03 | up   |
| 6454035 | 7373676 | 1805849 | GATA binding protein 1                          | Gata1  | 25172  | 1,19 | down |
| 6586741 | 7373676 | 1805843 | GATA binding protein 1                          | Gata1  | 25172  | 1,03 | up   |
| 6615770 | 7373676 | 1805848 | GATA binding protein 1                          | Gata1  | 25172  | 1,19 | up   |
| 5802813 | 7064199 | 1041668 | GDNF family receptor alpha 1                    | Gfra1  | 25454  | 1,28 | down |
| 5860371 | 7064199 | 1041667 | GDNF family receptor alpha 1                    | Gfra1  | 25454  | 1,13 | down |
| 6038737 | 7064199 | 1041672 | GDNF family receptor alpha 1                    | Gfra1  | 25454  | 1,46 | down |
| 6190367 | 7064199 | 1041674 | GDNF family receptor alpha 1                    | Gfra1  | 25454  | 1,16 | up   |
| 6190755 | 7064199 | 1041669 | GDNF family receptor alpha 1                    | Gfra1  | 25454  | 1,01 | down |
| 6198469 | 7064199 | 1041670 | GDNF family receptor alpha 1                    | Gfra1  | 25454  | 1,20 | down |
| 6320938 | 7064199 | 1041671 | GDNF family receptor alpha 1                    | Gfra1  | 25454  | 1,13 | down |
| 6334129 | 7064199 | 1041666 | GDNF family receptor alpha 1                    | Gfra1  | 25454  | 1,31 | up   |
| 6394724 | 7064199 | 1041667 | GDNF family receptor alpha 1                    | Gfra1  | 25454  | 2,84 | down |
| 6410078 | 7064199 | 1041673 | GDNF family receptor alpha 1                    | Gfra1  | 25454  | 1,30 | up   |
| 6462802 | 7064199 | 1041674 | GDNF family receptor alpha 1                    | Gfra1  | 25454  | 1,15 | up   |
| 6714836 | 7064199 | 1041666 | GDNF family receptor alpha 1                    | Gfra1  | 25454  | 1,12 | up   |
| 5618034 | 7079905 | 1079343 | gem (nuclear organelle) associated protein 4    | Gemin4 | 497958 | 1,78 | up   |
| 5747203 | 7079905 | 1079342 | gem (nuclear organelle) associated protein 4    | Gemin4 | 497958 | 1,32 | up   |
| 5758751 | 7079905 | 1079342 | gem (nuclear organelle) associated protein 4    | Gemin4 | 497958 | 1,13 | down |
| 6057241 | 7079905 | 1079342 | gem (nuclear organelle) associated protein 4    | Gemin4 | 497958 | 1,10 | down |
| 6269107 | 7079905 | 1079344 | gem (nuclear organelle) associated protein 4    | Gemin4 | 497958 | 1,18 | down |
| 6449166 | 7079905 | 1079342 | gem (nuclear organelle) associated protein 4    | Gemin4 | 497958 | 1,26 | down |
| 5710126 | 7367948 | 1788974 | general transcription factor IIF, polypeptide 1 | Gtf2f1 | 316123 | 1,02 | down |
| 5824702 | 7367948 | 1788979 | general transcription factor IIF, polypeptide 1 | Gtf2f1 | 316123 | 2,13 | down |
| 5924622 | 7367948 | 1788973 | general transcription factor IIF, polypeptide 1 | Gtf2f1 | 316123 | 1,19 | down |
| 5983476 | 7367948 | 1788977 | general transcription factor IIF, polypeptide 1 | Gtf2f1 | 316123 | 1,31 | up   |
| 6053954 | 7367948 | 1788977 | general transcription factor IIF, polypeptide 1 | Gtf2f1 | 316123 | 1,18 | up   |
| 6056300 | 7367948 | 1788976 | general transcription factor IIF, polypeptide 1 | Gtf2f1 | 316123 | 1,08 | down |
| 6196012 | 7367948 | 1788970 | general transcription factor IIF, polypeptide 1 | Gtf2f1 | 316123 | 1,06 | up   |
| 6248401 | 7367948 | 1788969 | general transcription factor IIF, polypeptide 1 | Gtf2f1 | 316123 | 1,08 | down |
| 6447338 | 7367948 | 1788971 | general transcription factor IIF, polypeptide 1 | Gtf2f1 | 316123 | 1,17 | up   |
| 6565475 | 7367948 | 1788978 | general transcription factor IIF, polypeptide 1 | Gtf2f1 | 316123 | 1,34 | up   |
| 6581871 | 7367948 | 1788968 | general transcription factor IIF, polypeptide 1 | Gtf2f1 | 316123 | 1,50 | down |
| 6699636 | 7367948 | 1788975 | general transcription factor IIF, polypeptide 1 | Gtf2f1 | 316123 | 1,09 | up   |
| 6718855 | 7367948 | 1788972 | general transcription factor IIF, polypeptide 1 | Gtf2f1 | 316123 | 1,43 | down |
| 5634934 | 7158439 | 1271456 | geranylgeranyl diphosphate synthase 1           | Ggps1  | 291211 | 1,15 | down |
| 5693940 | 7158439 | 1271455 | geranylgeranyl diphosphate synthase 1           | Ggps1  | 291211 | 1,05 | down |
| 5731993 | 7158439 | 1271453 | geranylgeranyl diphosphate synthase 1           | Ggps1  | 291211 | 1,31 | down |
| 5833287 | 7158439 | 1271456 | geranylgeranyl diphosphate synthase 1           | Ggps1  | 291211 | 1,18 | up   |
| 5881405 | 7158439 | 1271456 | geranylgeranyl diphosphate synthase 1           | Ggps1  | 291211 | 1,16 | down |
| 5954437 | 7158439 | 1271454 | geranylgeranyl diphosphate synthase 1           | Ggps1  | 291211 | 1,00 | up   |
| 6129209 | 7158439 | 1271452 | geranylgeranyl diphosphate synthase 1           | Ggps1  | 291211 | 1,80 | up   |
| 6164159 | 7158439 | 1271456 | geranylgeranyl diphosphate synthase 1           | Ggps1  | 291211 | 1,47 | down |
| 6172276 | 7158439 | 1271456 | geranylgeranyl diphosphate synthase 1           | Ggps1  | 291211 | 1,05 | up   |
| 6238862 | 7158439 | 1271455 | geranylgeranyl diphosphate synthase 1           | Ggps1  | 291211 | 1,32 | up   |
| 6499474 | 7158439 | 1271455 | geranylgeranyl diphosphate synthase 1           | Ggps1  | 291211 | 2,09 | up   |
| 6558857 | 7158439 | 1271456 | geranylgeranyl diphosphate synthase 1           | Ggps1  | 291211 | 1,23 | up   |
| 6686367 | 7158439 | 1271455 | geranylgeranyl diphosphate synthase 1           | Ggps1  | 291211 | 1,78 | down |
| 5647410 | 7266860 | 1539036 | germ cell-less homolog 1 (Drosophila)           | Gmcl1  | 312516 | 1,12 | down |
| 5664579 | 7266860 | 1539041 | germ cell-less homolog 1 (Drosophila)           | Gmcl1  | 312516 | 2,06 | down |
| 5682068 | 7266860 | 1539038 | germ cell-less homolog 1 (Drosophila)           | Gmcl1  | 312516 | 1,22 | down |
| 5705087 | 7266860 | 1539028 | germ cell-less homolog 1 (Drosophila)           | Gmcl1  | 312516 | 1,13 | down |

|         |         |         |                                        |       |        |      |      |
|---------|---------|---------|----------------------------------------|-------|--------|------|------|
| 5723977 | 7266860 | 1539030 | germ cell-less homolog 1 (Drosophila)  | Gmcl1 | 312516 | 1,12 | up   |
| 5728574 | 7266860 | 1539042 | germ cell-less homolog 1 (Drosophila)  | Gmcl1 | 312516 | 1,24 | up   |
| 5818297 | 7266860 | 1539029 | germ cell-less homolog 1 (Drosophila)  | Gmcl1 | 312516 | 1,33 | up   |
| 5863336 | 7266860 | 1539032 | germ cell-less homolog 1 (Drosophila)  | Gmcl1 | 312516 | 1,11 | up   |
| 5884154 | 7266860 | 1539034 | germ cell-less homolog 1 (Drosophila)  | Gmcl1 | 312516 | 1,02 | up   |
| 5920428 | 7266860 | 1539037 | germ cell-less homolog 1 (Drosophila)  | Gmcl1 | 312516 | 1,39 | up   |
| 5931047 | 7266860 | 1539028 | germ cell-less homolog 1 (Drosophila)  | Gmcl1 | 312516 | 1,56 | up   |
| 6003588 | 7266860 | 1539030 | germ cell-less homolog 1 (Drosophila)  | Gmcl1 | 312516 | 1,20 | down |
| 6030259 | 7266860 | 1539040 | germ cell-less homolog 1 (Drosophila)  | Gmcl1 | 312516 | 1,17 | down |
| 6259064 | 7266860 | 1539028 | germ cell-less homolog 1 (Drosophila)  | Gmcl1 | 312516 | 1,14 | up   |
| 6462323 | 7266860 | 1539035 | germ cell-less homolog 1 (Drosophila)  | Gmcl1 | 312516 | 1,15 | down |
| 6478967 | 7266860 | 1539028 | germ cell-less homolog 1 (Drosophila)  | Gmcl1 | 312516 | 1,76 | down |
| 6501291 | 7266860 | 1539039 | germ cell-less homolog 1 (Drosophila)  | Gmcl1 | 312516 | 1,28 | down |
| 6647398 | 7266860 | 1539033 | germ cell-less homolog 1 (Drosophila)  | Gmcl1 | 312516 | 1,12 | down |
| 6691923 | 7266860 | 1539031 | germ cell-less homolog 1 (Drosophila)  | Gmcl1 | 312516 | 1,09 | up   |
| 5630092 | 7182679 | 1332420 | GINS complex subunit 3 (Psf3 homolog)  | Gins3 | 307639 | 1,19 | down |
| 5743454 | 7182679 | 1332421 | GINS complex subunit 3 (Psf3 homolog)  | Gins3 | 307639 | 1,02 | up   |
| 5755303 | 7182679 | 1332418 | GINS complex subunit 3 (Psf3 homolog)  | Gins3 | 307639 | 1,50 | up   |
| 5804118 | 7182679 | 1332417 | GINS complex subunit 3 (Psf3 homolog)  | Gins3 | 307639 | 1,37 | up   |
| 5818969 | 7182679 | 1332420 | GINS complex subunit 3 (Psf3 homolog)  | Gins3 | 307639 | 1,02 | down |
| 5859691 | 7182679 | 1332417 | GINS complex subunit 3 (Psf3 homolog)  | Gins3 | 307639 | 1,15 | up   |
| 5992565 | 7182679 | 1332417 | GINS complex subunit 3 (Psf3 homolog)  | Gins3 | 307639 | 1,00 | down |
| 6067787 | 7182679 | 1332418 | GINS complex subunit 3 (Psf3 homolog)  | Gins3 | 307639 | 1,68 | up   |
| 6161186 | 7182679 | 1332417 | GINS complex subunit 3 (Psf3 homolog)  | Gins3 | 307639 | 1,15 | down |
| 6191342 | 7182679 | 1332417 | GINS complex subunit 3 (Psf3 homolog)  | Gins3 | 307639 | 1,46 | up   |
| 6419716 | 7182679 | 1332417 | GINS complex subunit 3 (Psf3 homolog)  | Gins3 | 307639 | 1,15 | up   |
| 6495433 | 7182679 | 1332417 | GINS complex subunit 3 (Psf3 homolog)  | Gins3 | 307639 | 1,33 | down |
| 6542041 | 7182679 | 1332417 | GINS complex subunit 3 (Psf3 homolog)  | Gins3 | 307639 | 2,79 | up   |
| 6572464 | 7182679 | 1332418 | GINS complex subunit 3 (Psf3 homolog)  | Gins3 | 307639 | 1,23 | down |
| 6267842 | 7274593 | 1558816 | GLI pathogenesis-related 2             | Gli2  | 304729 | 1,19 | up   |
| 5982257 | 7190493 | 1351067 | glial cell derived neurotrophic factor | Gdnf  | 25453  | 1,10 | up   |
| 6224031 | 7190493 | 1351067 | glial cell derived neurotrophic factor | Gdnf  | 25453  | 1,01 | up   |
| 6361016 | 7190493 | 1351068 | glial cell derived neurotrophic factor | Gdnf  | 25453  | 1,15 | up   |
| 6424340 | 7190493 | 1351068 | glial cell derived neurotrophic factor | Gdnf  | 25453  | 1,03 | up   |
| 6591381 | 7190493 | 1351067 | glial cell derived neurotrophic factor | Gdnf  | 25453  | 2,37 | down |
| 5657189 | 7110330 | 1152887 | GLI-Kruppel family member GLI2         | Gli2  | 304729 | 1,06 | down |
| 5717342 | 7110330 | 1152890 | GLI-Kruppel family member GLI2         | Gli2  | 304729 | 1,54 | down |
| 5808078 | 7110330 | 1152897 | GLI-Kruppel family member GLI2         | Gli2  | 304729 | 1,26 | up   |
| 5953477 | 7110330 | 1152893 | GLI-Kruppel family member GLI2         | Gli2  | 304729 | 1,13 | up   |
| 5998251 | 7110330 | 1152886 | GLI-Kruppel family member GLI2         | Gli2  | 304729 | 1,03 | up   |
| 6006878 | 7110330 | 1152891 | GLI-Kruppel family member GLI2         | Gli2  | 304729 | 1,12 | up   |
| 6042067 | 7110330 | 1152893 | GLI-Kruppel family member GLI2         | Gli2  | 304729 | 2,22 | down |
| 6093404 | 7110330 | 1152885 | GLI-Kruppel family member GLI2         | Gli2  | 304729 | 2,40 | down |
| 6159447 | 7110330 | 1152888 | GLI-Kruppel family member GLI2         | Gli2  | 304729 | 1,06 | up   |
| 6172018 | 7110330 | 1152907 | GLI-Kruppel family member GLI2         | Gli2  | 304729 | 1,69 | down |
| 6243664 | 7110330 | 1152892 | GLI-Kruppel family member GLI2         | Gli2  | 304729 | 1,10 | down |
| 6314084 | 7110330 | 1152896 | GLI-Kruppel family member GLI2         | Gli2  | 304729 | 1,57 | up   |
| 6336511 | 7110330 | 1152889 | GLI-Kruppel family member GLI2         | Gli2  | 304729 | 1,05 | up   |
| 6591255 | 7110330 | 1152907 | GLI-Kruppel family member GLI2         | Gli2  | 304729 | 1,02 | up   |
| 6617759 | 7110330 | 1152885 | GLI-Kruppel family member GLI2         | Gli2  | 304729 | 1,15 | down |
| 5650159 | 7074052 | 1066194 | glucagon receptor                      | Gcgr  | 24953  | 1,04 | down |
| 5690781 | 7074052 | 1066193 | glucagon receptor                      | Gcgr  | 24953  | 1,26 | up   |
| 5695169 | 7074052 | 1066185 | glucagon receptor                      | Gcgr  | 24953  | 1,03 | down |
| 5700306 | 7074052 | 1066190 | glucagon receptor                      | Gcgr  | 24953  | 1,11 | up   |
| 5930818 | 7074052 | 1066182 | glucagon receptor                      | Gcgr  | 24953  | 1,07 | down |
| 5957031 | 7074052 | 1066182 | glucagon receptor                      | Gcgr  | 24953  | 4,16 | down |



|         |         |         |                                           |       |        |      |      |
|---------|---------|---------|-------------------------------------------|-------|--------|------|------|
| 5990291 | 7074052 | 1066188 | glucagon receptor                         | Gcgr  | 24953  | 1,34 | up   |
| 6050865 | 7074052 | 1066187 | glucagon receptor                         | Gcgr  | 24953  | 1,15 | up   |
| 6150295 | 7074052 | 1066184 | glucagon receptor                         | Gcgr  | 24953  | 1,20 | up   |
| 6173112 | 7074052 | 1066194 | glucagon receptor                         | Gcgr  | 24953  | 1,16 | down |
| 6305830 | 7074052 | 1066189 | glucagon receptor                         | Gcgr  | 24953  | 1,11 | down |
| 6403191 | 7074052 | 1066183 | glucagon receptor                         | Gcgr  | 24953  | 1,05 | up   |
| 6410775 | 7074052 | 1066186 | glucagon receptor                         | Gcgr  | 24953  | 1,06 | down |
| 6522177 | 7074052 | 1066191 | glucagon receptor                         | Gcgr  | 24953  | 1,16 | up   |
| 6731116 | 7074052 | 1066192 | glucagon receptor                         | Gcgr  | 24953  | 1,05 | down |
| 5655792 | 7368684 | 1791857 | glucosidase, alpha, acid                  | Gaa   | 367562 | 1,03 | down |
| 5870287 | 7368684 | 1791862 | glucosidase, alpha, acid                  | Gaa   | 367562 | 1,21 | down |
| 6012231 | 7368684 | 1791860 | glucosidase, alpha, acid                  | Gaa   | 367562 | 1,28 | down |
| 6173894 | 7368684 | 1791854 | glucosidase, alpha, acid                  | Gaa   | 367562 | 1,47 | down |
| 6199267 | 7368684 | 1791858 | glucosidase, alpha, acid                  | Gaa   | 367562 | 1,03 | up   |
| 6307893 | 7368684 | 1791859 | glucosidase, alpha, acid                  | Gaa   | 367562 | 1,56 | down |
| 6570829 | 7368684 | 1791861 | glucosidase, alpha, acid                  | Gaa   | 367562 | 1,51 | down |
| 6572797 | 7368684 | 1791857 | glucosidase, alpha, acid                  | Gaa   | 367562 | 1,16 | down |
| 6665970 | 7368684 | 1791855 | glucosidase, alpha, acid                  | Gaa   | 367562 | 1,02 | down |
| 5631467 | 7378827 | 1818148 | glutamate receptor, ionotropic, AMPA 3    | Gria3 | 29628  | 1,15 | down |
| 5707532 | 7378827 | 1818140 | glutamate receptor, ionotropic, AMPA 3    | Gria3 | 29628  | 1,13 | up   |
| 5778106 | 7378827 | 1818151 | glutamate receptor, ionotropic, AMPA 3    | Gria3 | 29628  | 1,66 | up   |
| 5850608 | 7378827 | 1818144 | glutamate receptor, ionotropic, AMPA 3    | Gria3 | 29628  | 2,08 | down |
| 5868430 | 7378827 | 1818150 | glutamate receptor, ionotropic, AMPA 3    | Gria3 | 29628  | 1,34 | up   |
| 5885600 | 7378827 | 1818145 | glutamate receptor, ionotropic, AMPA 3    | Gria3 | 29628  | 1,45 | up   |
| 5890174 | 7378827 | 1818143 | glutamate receptor, ionotropic, AMPA 3    | Gria3 | 29628  | 1,02 | down |
| 5923317 | 7378827 | 1818134 | glutamate receptor, ionotropic, AMPA 3    | Gria3 | 29628  | 1,24 | down |
| 5978336 | 7378827 | 1818149 | glutamate receptor, ionotropic, AMPA 3    | Gria3 | 29628  | 1,14 | down |
| 6014282 | 7378827 | 1818150 | glutamate receptor, ionotropic, AMPA 3    | Gria3 | 29628  | 1,01 | down |
| 6091911 | 7378827 | 1818135 | glutamate receptor, ionotropic, AMPA 3    | Gria3 | 29628  | 1,71 | down |
| 6171768 | 7378827 | 1818137 | glutamate receptor, ionotropic, AMPA 3    | Gria3 | 29628  | 1,34 | down |
| 6308206 | 7378827 | 1818138 | glutamate receptor, ionotropic, AMPA 3    | Gria3 | 29628  | 1,40 | down |
| 6350536 | 7378827 | 1818142 | glutamate receptor, ionotropic, AMPA 3    | Gria3 | 29628  | 1,12 | up   |
| 6387882 | 7378827 | 1818138 | glutamate receptor, ionotropic, AMPA 3    | Gria3 | 29628  | 1,07 | down |
| 6405912 | 7378827 | 1818139 | glutamate receptor, ionotropic, AMPA 3    | Gria3 | 29628  | 1,12 | down |
| 6501822 | 7378827 | 1818148 | glutamate receptor, ionotropic, AMPA 3    | Gria3 | 29628  | 1,65 | up   |
| 6583717 | 7378827 | 1818136 | glutamate receptor, ionotropic, AMPA 3    | Gria3 | 29628  | 1,24 | down |
| 6684215 | 7378827 | 1818141 | glutamate receptor, ionotropic, AMPA 3    | Gria3 | 29628  | 1,14 | up   |
| 6692984 | 7378827 | 1818146 | glutamate receptor, ionotropic, AMPA 3    | Gria3 | 29628  | 1,02 | down |
| 6715607 | 7378827 | 1818147 | glutamate receptor, ionotropic, AMPA 3    | Gria3 | 29628  | 1,20 | up   |
| 5629608 | 7279469 | 1571674 | glutamate receptor, ionotropic, kainate 3 | Grik3 | 298521 | 1,16 | up   |
| 5679681 | 7279469 | 1571689 | glutamate receptor, ionotropic, kainate 3 | Grik3 | 298521 | 1,56 | down |
| 5744604 | 7279469 | 1571688 | glutamate receptor, ionotropic, kainate 3 | Grik3 | 298521 | 1,23 | down |
| 5804825 | 7279469 | 1571683 | glutamate receptor, ionotropic, kainate 3 | Grik3 | 298521 | 1,09 | up   |
| 5843006 | 7279469 | 1571676 | glutamate receptor, ionotropic, kainate 3 | Grik3 | 298521 | 1,11 | down |
| 5877028 | 7279469 | 1571675 | glutamate receptor, ionotropic, kainate 3 | Grik3 | 298521 | 1,23 | down |
| 5906796 | 7279469 | 1571689 | glutamate receptor, ionotropic, kainate 3 | Grik3 | 298521 | 1,18 | up   |
| 6008684 | 7279469 | 1571688 | glutamate receptor, ionotropic, kainate 3 | Grik3 | 298521 | 1,17 | down |
| 6020965 | 7279469 | 1571678 | glutamate receptor, ionotropic, kainate 3 | Grik3 | 298521 | 1,95 | up   |
| 6130185 | 7279469 | 1571686 | glutamate receptor, ionotropic, kainate 3 | Grik3 | 298521 | 1,02 | up   |
| 6199909 | 7279469 | 1571687 | glutamate receptor, ionotropic, kainate 3 | Grik3 | 298521 | 2,29 | down |
| 6244647 | 7279469 | 1571690 | glutamate receptor, ionotropic, kainate 3 | Grik3 | 298521 | 1,04 | up   |
| 6286739 | 7279469 | 1571679 | glutamate receptor, ionotropic, kainate 3 | Grik3 | 298521 | 1,26 | up   |
| 6332238 | 7279469 | 1571681 | glutamate receptor, ionotropic, kainate 3 | Grik3 | 298521 | 1,14 | up   |
| 6354048 | 7279469 | 1571680 | glutamate receptor, ionotropic, kainate 3 | Grik3 | 298521 | 1,07 | down |
| 6362233 | 7279469 | 1571682 | glutamate receptor, ionotropic, kainate 3 | Grik3 | 298521 | 1,31 | down |
| 6365335 | 7279469 | 1571674 | glutamate receptor, ionotropic, kainate 3 | Grik3 | 298521 | 1,08 | up   |

|         |         |         |                                                         |        |        |      |      |
|---------|---------|---------|---------------------------------------------------------|--------|--------|------|------|
| 6374012 | 7279469 | 1571685 | glutamate receptor, ionotropic, kainate 3               | Grik3  | 298521 | 1,04 | down |
| 6377746 | 7279469 | 1571673 | glutamate receptor, ionotropic, kainate 3               | Grik3  | 298521 | 1,30 | up   |
| 6491560 | 7279469 | 1571684 | glutamate receptor, ionotropic, kainate 3               | Grik3  | 298521 | 1,73 | down |
| 6602569 | 7279469 | 1571677 | glutamate receptor, ionotropic, kainate 3               | Grik3  | 298521 | 1,06 | down |
| 5658438 | 7344579 | 1731763 | glutamate receptor, ionotropic, kainate 4               | Grik4  | 24406  | 1,81 | down |
| 5694862 | 7344579 | 1731768 | glutamate receptor, ionotropic, kainate 4               | Grik4  | 24406  | 1,20 | down |
| 5844977 | 7344579 | 1731760 | glutamate receptor, ionotropic, kainate 4               | Grik4  | 24406  | 1,28 | up   |
| 5863105 | 7344579 | 1731765 | glutamate receptor, ionotropic, kainate 4               | Grik4  | 24406  | 1,05 | up   |
| 5902156 | 7344579 | 1731770 | glutamate receptor, ionotropic, kainate 4               | Grik4  | 24406  | 1,06 | up   |
| 5904218 | 7344579 | 1731761 | glutamate receptor, ionotropic, kainate 4               | Grik4  | 24406  | 1,04 | up   |
| 5983709 | 7344579 | 1731762 | glutamate receptor, ionotropic, kainate 4               | Grik4  | 24406  | 1,01 | down |
| 5998015 | 7344579 | 1731758 | glutamate receptor, ionotropic, kainate 4               | Grik4  | 24406  | 1,29 | down |
| 6028055 | 7344579 | 1731756 | glutamate receptor, ionotropic, kainate 4               | Grik4  | 24406  | 1,23 | down |
| 6091729 | 7344579 | 1731762 | glutamate receptor, ionotropic, kainate 4               | Grik4  | 24406  | 1,03 | up   |
| 6092698 | 7344579 | 1731754 | glutamate receptor, ionotropic, kainate 4               | Grik4  | 24406  | 1,46 | down |
| 6109032 | 7344579 | 1731769 | glutamate receptor, ionotropic, kainate 4               | Grik4  | 24406  | 2,05 | down |
| 6168261 | 7344579 | 1731766 | glutamate receptor, ionotropic, kainate 4               | Grik4  | 24406  | 1,01 | up   |
| 6320768 | 7344579 | 1731753 | glutamate receptor, ionotropic, kainate 4               | Grik4  | 24406  | 1,37 | down |
| 6409674 | 7344579 | 1731757 | glutamate receptor, ionotropic, kainate 4               | Grik4  | 24406  | 2,07 | up   |
| 6450631 | 7344579 | 1731759 | glutamate receptor, ionotropic, kainate 4               | Grik4  | 24406  | 1,06 | up   |
| 6540294 | 7344579 | 1731764 | glutamate receptor, ionotropic, kainate 4               | Grik4  | 24406  | 1,05 | up   |
| 6609636 | 7344579 | 1731767 | glutamate receptor, ionotropic, kainate 4               | Grik4  | 24406  | 1,59 | up   |
| 6649215 | 7344579 | 1731752 | glutamate receptor, ionotropic, kainate 4               | Grik4  | 24406  | 1,14 | up   |
| 6678781 | 7344579 | 1731755 | glutamate receptor, ionotropic, kainate 4               | Grik4  | 24406  | 1,18 | down |
| 6720067 | 7344579 | 1731768 | glutamate receptor, ionotropic, kainate 4               | Grik4  | 24406  | 1,20 | down |
| 5709479 | 7236770 | 1465186 | glutamate receptor, ionotropic, N-methyl D-aspartate 1  | Grin1  | 24408  | 1,33 | up   |
| 5724922 | 7236770 | 1465192 | glutamate receptor, ionotropic, N-methyl D-aspartate 1  | Grin1  | 24408  | 1,49 | up   |
| 5773298 | 7236770 | 1465193 | glutamate receptor, ionotropic, N-methyl D-aspartate 1  | Grin1  | 24408  | 1,32 | down |
| 5774910 | 7236770 | 1465179 | glutamate receptor, ionotropic, N-methyl D-aspartate 1  | Grin1  | 24408  | 1,00 | down |
| 5786901 | 7236770 | 1465200 | glutamate receptor, ionotropic, N-methyl D-aspartate 1  | Grin1  | 24408  | 1,12 | up   |
| 5909825 | 7236770 | 1465182 | glutamate receptor, ionotropic, N-methyl D-aspartate 1  | Grin1  | 24408  | 1,27 | down |
| 5922414 | 7236770 | 1465197 | glutamate receptor, ionotropic, N-methyl D-aspartate 1  | Grin1  | 24408  | 2,06 | up   |
| 5926261 | 7236770 | 1465181 | glutamate receptor, ionotropic, N-methyl D-aspartate 1  | Grin1  | 24408  | 2,46 | up   |
| 5934925 | 7236770 | 1465196 | glutamate receptor, ionotropic, N-methyl D-aspartate 1  | Grin1  | 24408  | 1,58 | up   |
| 5976648 | 7236770 | 1465198 | glutamate receptor, ionotropic, N-methyl D-aspartate 1  | Grin1  | 24408  | 1,83 | up   |
| 6033860 | 7236770 | 1465180 | glutamate receptor, ionotropic, N-methyl D-aspartate 1  | Grin1  | 24408  | 1,92 | up   |
| 6073946 | 7236770 | 1465199 | glutamate receptor, ionotropic, N-methyl D-aspartate 1  | Grin1  | 24408  | 1,10 | up   |
| 6147869 | 7236770 | 1465179 | glutamate receptor, ionotropic, N-methyl D-aspartate 1  | Grin1  | 24408  | 1,68 | up   |
| 6163377 | 7236770 | 1465184 | glutamate receptor, ionotropic, N-methyl D-aspartate 1  | Grin1  | 24408  | 1,47 | down |
| 6174453 | 7236770 | 1465191 | glutamate receptor, ionotropic, N-methyl D-aspartate 1  | Grin1  | 24408  | 3,87 | down |
| 6238938 | 7236770 | 1465194 | glutamate receptor, ionotropic, N-methyl D-aspartate 1  | Grin1  | 24408  | 1,07 | up   |
| 6268664 | 7236770 | 1465188 | glutamate receptor, ionotropic, N-methyl D-aspartate 1  | Grin1  | 24408  | 1,10 | down |
| 6272469 | 7236770 | 1465190 | glutamate receptor, ionotropic, N-methyl D-aspartate 1  | Grin1  | 24408  | 1,26 | down |
| 6289887 | 7236770 | 1465195 | glutamate receptor, ionotropic, N-methyl D-aspartate 1  | Grin1  | 24408  | 1,32 | up   |
| 6316258 | 7236770 | 1465179 | glutamate receptor, ionotropic, N-methyl D-aspartate 1  | Grin1  | 24408  | 1,01 | up   |
| 6320504 | 7236770 | 1465185 | glutamate receptor, ionotropic, N-methyl D-aspartate 1  | Grin1  | 24408  | 1,19 | up   |
| 6369196 | 7236770 | 1465189 | glutamate receptor, ionotropic, N-methyl D-aspartate 1  | Grin1  | 24408  | 1,37 | up   |
| 6512545 | 7236770 | 1465186 | glutamate receptor, ionotropic, N-methyl D-aspartate 1  | Grin1  | 24408  | 1,05 | down |
| 6554637 | 7236770 | 1465187 | glutamate receptor, ionotropic, N-methyl D-aspartate 1  | Grin1  | 24408  | 1,17 | up   |
| 6608443 | 7236770 | 1465183 | glutamate receptor, ionotropic, N-methyl D-aspartate 1  | Grin1  | 24408  | 1,85 | down |
| 5685210 | 7064856 | 1043208 | glutamate receptor, ionotropic, N-methyl D-aspartate 2A | Grin2a | 24409  | 1,25 | down |
| 5689468 | 7064856 | 1043212 | glutamate receptor, ionotropic, N-methyl D-aspartate 2A | Grin2a | 24409  | 1,37 | up   |
| 5761569 | 7064856 | 1043204 | glutamate receptor, ionotropic, N-methyl D-aspartate 2A | Grin2a | 24409  | 1,18 | up   |
| 5858502 | 7064856 | 1043215 | glutamate receptor, ionotropic, N-methyl D-aspartate 2A | Grin2a | 24409  | 1,31 | up   |
| 5914058 | 7064856 | 1043202 | glutamate receptor, ionotropic, N-methyl D-aspartate 2A | Grin2a | 24409  | 1,29 | up   |
| 5994538 | 7064856 | 1043211 | glutamate receptor, ionotropic, N-methyl D-aspartate 2A | Grin2a | 24409  | 1,41 | up   |

|         |         |         |                                                         |        |       |      |      |
|---------|---------|---------|---------------------------------------------------------|--------|-------|------|------|
| 6034085 | 7064856 | 1043207 | glutamate receptor, ionotropic, N-methyl D-aspartate 2A | Grin2a | 24409 | 1,21 | down |
| 6035197 | 7064856 | 1043214 | glutamate receptor, ionotropic, N-methyl D-aspartate 2A | Grin2a | 24409 | 2,84 | up   |
| 6089501 | 7064856 | 1043214 | glutamate receptor, ionotropic, N-methyl D-aspartate 2A | Grin2a | 24409 | 1,25 | up   |
| 6094545 | 7064856 | 1043210 | glutamate receptor, ionotropic, N-methyl D-aspartate 2A | Grin2a | 24409 | 1,02 | up   |
| 6153493 | 7064856 | 1043214 | glutamate receptor, ionotropic, N-methyl D-aspartate 2A | Grin2a | 24409 | 1,68 | up   |
| 6182315 | 7064856 | 1043206 | glutamate receptor, ionotropic, N-methyl D-aspartate 2A | Grin2a | 24409 | 1,73 | down |
| 6225564 | 7064856 | 1043214 | glutamate receptor, ionotropic, N-methyl D-aspartate 2A | Grin2a | 24409 | 1,62 | down |
| 6376667 | 7064856 | 1043209 | glutamate receptor, ionotropic, N-methyl D-aspartate 2A | Grin2a | 24409 | 1,19 | down |
| 6395956 | 7064856 | 1043213 | glutamate receptor, ionotropic, N-methyl D-aspartate 2A | Grin2a | 24409 | 1,82 | up   |
| 6460267 | 7064856 | 1043214 | glutamate receptor, ionotropic, N-methyl D-aspartate 2A | Grin2a | 24409 | 1,21 | up   |
| 6557291 | 7064856 | 1043214 | glutamate receptor, ionotropic, N-methyl D-aspartate 2A | Grin2a | 24409 | 1,04 | up   |
| 6637897 | 7064856 | 1043205 | glutamate receptor, ionotropic, N-methyl D-aspartate 2A | Grin2a | 24409 | 1,49 | down |
| 6741120 | 7064856 | 1043203 | glutamate receptor, ionotropic, N-methyl D-aspartate 2A | Grin2a | 24409 | 1,31 | down |
| 5677588 | 7051103 | 1012000 | glutamate receptor, ionotropic, N-methyl D-aspartate 2D | Grin2d | 24412 | 1,76 | down |
| 5766565 | 7051103 | 1012006 | glutamate receptor, ionotropic, N-methyl D-aspartate 2D | Grin2d | 24412 | 1,02 | down |
| 5821833 | 7051103 | 1012007 | glutamate receptor, ionotropic, N-methyl D-aspartate 2D | Grin2d | 24412 | 1,42 | down |
| 5881525 | 7051103 | 1012000 | glutamate receptor, ionotropic, N-methyl D-aspartate 2D | Grin2d | 24412 | 1,10 | down |
| 5944474 | 7051103 | 1012009 | glutamate receptor, ionotropic, N-methyl D-aspartate 2D | Grin2d | 24412 | 1,12 | up   |
| 5995255 | 7051103 | 1012011 | glutamate receptor, ionotropic, N-methyl D-aspartate 2D | Grin2d | 24412 | 1,11 | up   |
| 6010964 | 7051103 | 1011999 | glutamate receptor, ionotropic, N-methyl D-aspartate 2D | Grin2d | 24412 | 1,03 | up   |
| 6080429 | 7051103 | 1011998 | glutamate receptor, ionotropic, N-methyl D-aspartate 2D | Grin2d | 24412 | 1,10 | down |
| 6205907 | 7051103 | 1012012 | glutamate receptor, ionotropic, N-methyl D-aspartate 2D | Grin2d | 24412 | 2,07 | down |
| 6225570 | 7051103 | 1012003 | glutamate receptor, ionotropic, N-methyl D-aspartate 2D | Grin2d | 24412 | 1,11 | up   |
| 6294659 | 7051103 | 1012005 | glutamate receptor, ionotropic, N-methyl D-aspartate 2D | Grin2d | 24412 | 1,38 | down |
| 6326666 | 7051103 | 1012013 | glutamate receptor, ionotropic, N-methyl D-aspartate 2D | Grin2d | 24412 | 1,03 | down |
| 6365715 | 7051103 | 1012001 | glutamate receptor, ionotropic, N-methyl D-aspartate 2D | Grin2d | 24412 | 1,16 | up   |
| 6365903 | 7051103 | 1012000 | glutamate receptor, ionotropic, N-methyl D-aspartate 2D | Grin2d | 24412 | 1,47 | up   |
| 6396224 | 7051103 | 1012010 | glutamate receptor, ionotropic, N-methyl D-aspartate 2D | Grin2d | 24412 | 1,21 | down |
| 6475977 | 7051103 | 1011999 | glutamate receptor, ionotropic, N-methyl D-aspartate 2D | Grin2d | 24412 | 1,12 | up   |
| 6544304 | 7051103 | 1012012 | glutamate receptor, ionotropic, N-methyl D-aspartate 2D | Grin2d | 24412 | 1,02 | up   |
| 6582339 | 7051103 | 1012004 | glutamate receptor, ionotropic, N-methyl D-aspartate 2D | Grin2d | 24412 | 1,19 | up   |
| 6600415 | 7051103 | 1011998 | glutamate receptor, ionotropic, N-methyl D-aspartate 2D | Grin2d | 24412 | 1,37 | down |
| 6636871 | 7051103 | 1012008 | glutamate receptor, ionotropic, N-methyl D-aspartate 2D | Grin2d | 24412 | 1,12 | down |
| 6686890 | 7051103 | 1012008 | glutamate receptor, ionotropic, N-methyl D-aspartate 2D | Grin2d | 24412 | 1,08 | up   |
| 6691375 | 7051103 | 1012002 | glutamate receptor, ionotropic, N-methyl D-aspartate 2D | Grin2d | 24412 | 1,07 | up   |
| 5635136 | 7067335 | 1049468 | glutamate receptor, metabotropic 6                      | Grm6   | 24419 | 1,99 | down |
| 5687656 | 7067335 | 1049471 | glutamate receptor, metabotropic 6                      | Grm6   | 24419 | 1,27 | down |
| 5770587 | 7067335 | 1049472 | glutamate receptor, metabotropic 6                      | Grm6   | 24419 | 1,31 | down |
| 5807429 | 7067335 | 1049473 | glutamate receptor, metabotropic 6                      | Grm6   | 24419 | 1,00 | up   |
| 5830559 | 7067335 | 1049462 | glutamate receptor, metabotropic 6                      | Grm6   | 24419 | 1,24 | up   |
| 5877353 | 7067335 | 1049470 | glutamate receptor, metabotropic 6                      | Grm6   | 24419 | 1,02 | up   |
| 5886780 | 7067335 | 1049463 | glutamate receptor, metabotropic 6                      | Grm6   | 24419 | 1,00 | down |
| 6112904 | 7067335 | 1049465 | glutamate receptor, metabotropic 6                      | Grm6   | 24419 | 1,15 | up   |
| 6172831 | 7067335 | 1049464 | glutamate receptor, metabotropic 6                      | Grm6   | 24419 | 1,25 | up   |
| 6296097 | 7067335 | 1049466 | glutamate receptor, metabotropic 6                      | Grm6   | 24419 | 1,35 | down |
| 6296678 | 7067335 | 1049469 | glutamate receptor, metabotropic 6                      | Grm6   | 24419 | 1,16 | down |
| 6409414 | 7067335 | 1049463 | glutamate receptor, metabotropic 6                      | Grm6   | 24419 | 2,30 | down |
| 6643850 | 7067335 | 1049467 | glutamate receptor, metabotropic 6                      | Grm6   | 24419 | 1,13 | down |
| 5720819 | 7338247 | 1715511 | glutamate-cysteine ligase, catalytic subunit            | Gclc   | 25283 | 1,41 | up   |
| 5764604 | 7338247 | 1715519 | glutamate-cysteine ligase, catalytic subunit            | Gclc   | 25283 | 1,36 | up   |
| 5825289 | 7338247 | 1715518 | glutamate-cysteine ligase, catalytic subunit            | Gclc   | 25283 | 1,15 | up   |
| 5839946 | 7338247 | 1715526 | glutamate-cysteine ligase, catalytic subunit            | Gclc   | 25283 | 1,57 | down |
| 5840705 | 7338247 | 1715523 | glutamate-cysteine ligase, catalytic subunit            | Gclc   | 25283 | 1,06 | down |
| 5982204 | 7338247 | 1715520 | glutamate-cysteine ligase, catalytic subunit            | Gclc   | 25283 | 2,28 | down |
| 6051975 | 7338247 | 1715512 | glutamate-cysteine ligase, catalytic subunit            | Gclc   | 25283 | 1,18 | up   |
| 6080947 | 7338247 | 1715515 | glutamate-cysteine ligase, catalytic subunit            | Gclc   | 25283 | 1,01 | up   |

|         |         |         |                                                         |       |        |      |      |
|---------|---------|---------|---------------------------------------------------------|-------|--------|------|------|
| 6121141 | 7338247 | 1715513 | glutamate-cysteine ligase, catalytic subunit            | Gclc  | 25283  | 1,05 | up   |
| 6292045 | 7338247 | 1715510 | glutamate-cysteine ligase, catalytic subunit            | Gclc  | 25283  | 1,78 | down |
| 6368908 | 7338247 | 1715517 | glutamate-cysteine ligase, catalytic subunit            | Gclc  | 25283  | 1,01 | down |
| 6380889 | 7338247 | 1715510 | glutamate-cysteine ligase, catalytic subunit            | Gclc  | 25283  | 1,68 | down |
| 6387087 | 7338247 | 1715523 | glutamate-cysteine ligase, catalytic subunit            | Gclc  | 25283  | 1,52 | down |
| 6412050 | 7338247 | 1715516 | glutamate-cysteine ligase, catalytic subunit            | Gclc  | 25283  | 1,52 | up   |
| 6562496 | 7338247 | 1715514 | glutamate-cysteine ligase, catalytic subunit            | Gclc  | 25283  | 1,04 | up   |
| 6601061 | 7338247 | 1715525 | glutamate-cysteine ligase, catalytic subunit            | Gclc  | 25283  | 1,12 | down |
| 6607890 | 7338247 | 1715518 | glutamate-cysteine ligase, catalytic subunit            | Gclc  | 25283  | 1,01 | up   |
| 6647683 | 7338247 | 1715524 | glutamate-cysteine ligase, catalytic subunit            | Gclc  | 25283  | 1,05 | up   |
| 6659677 | 7338247 | 1715515 | glutamate-cysteine ligase, catalytic subunit            | Gclc  | 25283  | 1,08 | up   |
| 6678558 | 7338247 | 1715521 | glutamate-cysteine ligase, catalytic subunit            | Gclc  | 25283  | 1,06 | down |
| 6723979 | 7338247 | 1715522 | glutamate-cysteine ligase, catalytic subunit            | Gclc  | 25283  | 1,09 | up   |
| 5772607 | 7187674 | 1343856 | glutaredoxin 1 (thioltransferase)                       | Glxr1 | 64045  | 1,03 | down |
| 6079929 | 7187674 | 1343856 | glutaredoxin 1 (thioltransferase)                       | Glxr1 | 64045  | 2,11 | up   |
| 6138379 | 7187674 | 1343858 | glutaredoxin 1 (thioltransferase)                       | Glxr1 | 64045  | 1,29 | up   |
| 6208841 | 7187674 | 1343857 | glutaredoxin 1 (thioltransferase)                       | Glxr1 | 64045  | 1,04 | up   |
| 5632060 | 7214363 | 1408951 | glutathione S-transferase, C-terminal domain containing | Gstcd | 310855 | 1,02 | down |
| 6092758 | 7214363 | 1408946 | glutathione S-transferase, C-terminal domain containing | Gstcd | 310855 | 1,68 | up   |
| 6093635 | 7214363 | 1408946 | glutathione S-transferase, C-terminal domain containing | Gstcd | 310855 | 1,18 | up   |
| 6119266 | 7214363 | 1408953 | glutathione S-transferase, C-terminal domain containing | Gstcd | 310855 | 1,51 | down |
| 6296238 | 7214363 | 1408956 | glutathione S-transferase, C-terminal domain containing | Gstcd | 310855 | 1,15 | down |
| 6301668 | 7214363 | 1408967 | glutathione S-transferase, C-terminal domain containing | Gstcd | 310855 | 1,46 | down |
| 6339719 | 7214363 | 1408957 | glutathione S-transferase, C-terminal domain containing | Gstcd | 310855 | 1,02 | up   |
| 6349227 | 7214363 | 1408969 | glutathione S-transferase, C-terminal domain containing | Gstcd | 310855 | 1,01 | down |
| 6349802 | 7214363 | 1408970 | glutathione S-transferase, C-terminal domain containing | Gstcd | 310855 | 1,16 | up   |
| 6373738 | 7214363 | 1408970 | glutathione S-transferase, C-terminal domain containing | Gstcd | 310855 | 1,11 | down |
| 6378952 | 7214363 | 1408952 | glutathione S-transferase, C-terminal domain containing | Gstcd | 310855 | 1,01 | up   |
| 6397361 | 7214363 | 1408966 | glutathione S-transferase, C-terminal domain containing | Gstcd | 310855 | 1,08 | down |
| 6482123 | 7214363 | 1408970 | glutathione S-transferase, C-terminal domain containing | Gstcd | 310855 | 3,05 | down |
| 6485107 | 7214363 | 1408945 | glutathione S-transferase, C-terminal domain containing | Gstcd | 310855 | 1,07 | up   |
| 6518964 | 7214363 | 1408970 | glutathione S-transferase, C-terminal domain containing | Gstcd | 310855 | 1,70 | up   |
| 6559365 | 7214363 | 1408952 | glutathione S-transferase, C-terminal domain containing | Gstcd | 310855 | 1,27 | down |
| 6581315 | 7214363 | 1408949 | glutathione S-transferase, C-terminal domain containing | Gstcd | 310855 | 1,54 | up   |
| 6608912 | 7214363 | 1408955 | glutathione S-transferase, C-terminal domain containing | Gstcd | 310855 | 2,20 | down |
| 5622577 | 7212638 | 1404749 | glutathione S-transferase, mu 7                         | Gstm7 | 81869  | 1,10 | down |
| 5808626 | 7212638 | 1404754 | glutathione S-transferase, mu 7                         | Gstm7 | 81869  | 1,42 | down |
| 5816012 | 7212638 | 1404753 | glutathione S-transferase, mu 7                         | Gstm7 | 81869  | 1,09 | down |
| 5885618 | 7212638 | 1404751 | glutathione S-transferase, mu 7                         | Gstm7 | 81869  | 1,41 | up   |
| 5996325 | 7212638 | 1404752 | glutathione S-transferase, mu 7                         | Gstm7 | 81869  | 1,23 | down |
| 6110613 | 7212638 | 1404757 | glutathione S-transferase, mu 7                         | Gstm7 | 81869  | 2,40 | up   |
| 6216373 | 7212638 | 1404756 | glutathione S-transferase, mu 7                         | Gstm7 | 81869  | 1,08 | down |
| 6357686 | 7212638 | 1404755 | glutathione S-transferase, mu 7                         | Gstm7 | 81869  | 1,81 | up   |
| 6419661 | 7212638 | 1404750 | glutathione S-transferase, mu 7                         | Gstm7 | 81869  | 1,23 | down |
| 6287997 | 7339387 | 1718372 | glycerol kinase 5 (putative)                            | Gk5   | 367146 | 2,10 | down |
| 6501145 | 7339387 | 1718372 | glycerol kinase 5 (putative)                            | Gk5   | 367146 | 1,72 | down |
| 5637977 | 7320712 | 1674084 | glycerol-3-phosphate dehydrogenase 1 (soluble)          | Gpd1  | 60666  | 1,76 | up   |
| 5670498 | 7320712 | 1674085 | glycerol-3-phosphate dehydrogenase 1 (soluble)          | Gpd1  | 60666  | 1,66 | down |
| 5727089 | 7320712 | 1674093 | glycerol-3-phosphate dehydrogenase 1 (soluble)          | Gpd1  | 60666  | 2,04 | down |
| 5754875 | 7320712 | 1674091 | glycerol-3-phosphate dehydrogenase 1 (soluble)          | Gpd1  | 60666  | 1,10 | down |
| 5927902 | 7320712 | 1674093 | glycerol-3-phosphate dehydrogenase 1 (soluble)          | Gpd1  | 60666  | 1,01 | down |
| 5937264 | 7320712 | 1674086 | glycerol-3-phosphate dehydrogenase 1 (soluble)          | Gpd1  | 60666  | 1,19 | down |
| 5963889 | 7320712 | 1674089 | glycerol-3-phosphate dehydrogenase 1 (soluble)          | Gpd1  | 60666  | 1,48 | down |
| 5999854 | 7320712 | 1674092 | glycerol-3-phosphate dehydrogenase 1 (soluble)          | Gpd1  | 60666  | 1,17 | up   |
| 6075019 | 7320712 | 1674088 | glycerol-3-phosphate dehydrogenase 1 (soluble)          | Gpd1  | 60666  | 1,70 | down |
| 6150253 | 7320712 | 1674092 | glycerol-3-phosphate dehydrogenase 1 (soluble)          | Gpd1  | 60666  | 1,27 | down |

|         |         |         |                                                                          |       |        |      |      |
|---------|---------|---------|--------------------------------------------------------------------------|-------|--------|------|------|
| 6249321 | 7320712 | 1674090 | glycerol-3-phosphate dehydrogenase 1 (soluble)                           | Gpd1  | 60666  | 1,22 | up   |
| 6437689 | 7320712 | 1674087 | glycerol-3-phosphate dehydrogenase 1 (soluble)                           | Gpd1  | 60666  | 1,21 | down |
| 6551154 | 7320712 | 1674092 | glycerol-3-phosphate dehydrogenase 1 (soluble)                           | Gpd1  | 60666  | 1,19 | up   |
| 6641409 | 7320712 | 1674093 | glycerol-3-phosphate dehydrogenase 1 (soluble)                           | Gpd1  | 60666  | 1,23 | up   |
| 6685159 | 7320712 | 1674092 | glycerol-3-phosphate dehydrogenase 1 (soluble)                           | Gpd1  | 60666  | 1,72 | down |
| 5840453 | 7034486 | 972502  | glycerophosphodiester phosphodiesterase domain containing 5              | Gdpd5 | 499211 | 1,22 | up   |
| 5889417 | 7034486 | 972527  | glycerophosphodiester phosphodiesterase domain containing 5              | Gdpd5 | 499211 | 1,00 | up   |
| 5922386 | 7034486 | 972526  | glycerophosphodiester phosphodiesterase domain containing 5              | Gdpd5 | 499211 | 1,13 | down |
| 6028302 | 7034486 | 972533  | glycerophosphodiester phosphodiesterase domain containing 5              | Gdpd5 | 499211 | 1,24 | up   |
| 6098276 | 7034486 | 972528  | glycerophosphodiester phosphodiesterase domain containing 5              | Gdpd5 | 499211 | 1,03 | down |
| 6140877 | 7034486 | 972503  | glycerophosphodiester phosphodiesterase domain containing 5              | Gdpd5 | 499211 | 1,40 | up   |
| 6214060 | 7034486 | 972533  | glycerophosphodiester phosphodiesterase domain containing 5              | Gdpd5 | 499211 | 1,03 | up   |
| 6224573 | 7034486 | 972510  | glycerophosphodiester phosphodiesterase domain containing 5              | Gdpd5 | 499211 | 1,01 | up   |
| 6257831 | 7034486 | 972531  | glycerophosphodiester phosphodiesterase domain containing 5              | Gdpd5 | 499211 | 1,04 | up   |
| 6355312 | 7034486 | 972525  | glycerophosphodiester phosphodiesterase domain containing 5              | Gdpd5 | 499211 | 1,04 | down |
| 6356758 | 7034486 | 972532  | glycerophosphodiester phosphodiesterase domain containing 5              | Gdpd5 | 499211 | 1,08 | down |
| 6374670 | 7034486 | 972524  | glycerophosphodiester phosphodiesterase domain containing 5              | Gdpd5 | 499211 | 1,03 | up   |
| 6393743 | 7034486 | 972521  | glycerophosphodiester phosphodiesterase domain containing 5              | Gdpd5 | 499211 | 1,22 | up   |
| 6420508 | 7034486 | 972520  | glycerophosphodiester phosphodiesterase domain containing 5              | Gdpd5 | 499211 | 1,11 | down |
| 6473504 | 7034486 | 972516  | glycerophosphodiester phosphodiesterase domain containing 5              | Gdpd5 | 499211 | 1,04 | down |
| 6523064 | 7034486 | 972522  | glycerophosphodiester phosphodiesterase domain containing 5              | Gdpd5 | 499211 | 1,56 | up   |
| 6597899 | 7034486 | 972533  | glycerophosphodiester phosphodiesterase domain containing 5              | Gdpd5 | 499211 | 1,57 | down |
| 6625429 | 7034486 | 972517  | glycerophosphodiester phosphodiesterase domain containing 5              | Gdpd5 | 499211 | 1,40 | down |
| 6705013 | 7034486 | 972515  | glycerophosphodiester phosphodiesterase domain containing 5              | Gdpd5 | 499211 | 1,03 | down |
| 6739719 | 7034486 | 972506  | glycerophosphodiester phosphodiesterase domain containing 5              | Gdpd5 | 499211 | 1,54 | up   |
| 6742160 | 7034486 | 972523  | glycerophosphodiester phosphodiesterase domain containing 5              | Gdpd5 | 499211 | 2,17 | up   |
| 5677685 | 7253531 | 1506299 | glycoprotein (transmembrane) nmb                                         | Gpnm  | 113955 | 1,17 | down |
| 5692697 | 7253531 | 1506302 | glycoprotein (transmembrane) nmb                                         | Gpnm  | 113955 | 1,28 | down |
| 5718958 | 7253531 | 1506292 | glycoprotein (transmembrane) nmb                                         | Gpnm  | 113955 | 1,29 | up   |
| 5724544 | 7253531 | 1506300 | glycoprotein (transmembrane) nmb                                         | Gpnm  | 113955 | 1,11 | up   |
| 5782339 | 7253531 | 1506303 | glycoprotein (transmembrane) nmb                                         | Gpnm  | 113955 | 1,09 | down |
| 5848063 | 7253531 | 1506296 | glycoprotein (transmembrane) nmb                                         | Gpnm  | 113955 | 1,47 | up   |
| 5987686 | 7253531 | 1506294 | glycoprotein (transmembrane) nmb                                         | Gpnm  | 113955 | 1,10 | up   |
| 5993652 | 7253531 | 1506293 | glycoprotein (transmembrane) nmb                                         | Gpnm  | 113955 | 1,69 | up   |
| 5997323 | 7253531 | 1506297 | glycoprotein (transmembrane) nmb                                         | Gpnm  | 113955 | 1,71 | up   |
| 6003400 | 7253531 | 1506297 | glycoprotein (transmembrane) nmb                                         | Gpnm  | 113955 | 1,44 | up   |
| 6018871 | 7253531 | 1506295 | glycoprotein (transmembrane) nmb                                         | Gpnm  | 113955 | 1,04 | down |
| 6103932 | 7253531 | 1506298 | glycoprotein (transmembrane) nmb                                         | Gpnm  | 113955 | 1,96 | down |
| 6310312 | 7253531 | 1506301 | glycoprotein (transmembrane) nmb                                         | Gpnm  | 113955 | 2,97 | down |
| 6558013 | 7253531 | 1506292 | glycoprotein (transmembrane) nmb                                         | Gpnm  | 113955 | 1,39 | up   |
| 5662815 | 7039270 | 983678  | glycoprotein hormone alpha 2                                             | Gpha2 | 171158 | 1,40 | down |
| 5684653 | 7039270 | 983677  | glycoprotein hormone alpha 2                                             | Gpha2 | 171158 | 1,54 | up   |
| 5846284 | 7039270 | 983676  | glycoprotein hormone alpha 2                                             | Gpha2 | 171158 | 2,40 | up   |
| 6355050 | 7039270 | 983675  | glycoprotein hormone alpha 2                                             | Gpha2 | 171158 | 1,86 | down |
| 6454422 | 7039270 | 983675  | glycoprotein hormone alpha 2                                             | Gpha2 | 171158 | 1,33 | down |
| 6571628 | 7039270 | 983674  | glycoprotein hormone alpha 2                                             | Gpha2 | 171158 | 1,39 | down |
| 5655525 | 7318268 | 1668286 | glycosylphosphatidylinositol anchor attachment protein 1 homolog (yeast) | Gpaa1 | 300046 | 1,19 | down |
| 5786666 | 7318268 | 1668280 | glycosylphosphatidylinositol anchor attachment protein 1 homolog (yeast) | Gpaa1 | 300046 | 1,38 | up   |
| 5806140 | 7318268 | 1668284 | glycosylphosphatidylinositol anchor attachment protein 1 homolog (yeast) | Gpaa1 | 300046 | 1,42 | down |
| 5806267 | 7318268 | 1668282 | glycosylphosphatidylinositol anchor attachment protein 1 homolog (yeast) | Gpaa1 | 300046 | 1,09 | up   |
| 5833525 | 7318268 | 1668288 | glycosylphosphatidylinositol anchor attachment protein 1 homolog (yeast) | Gpaa1 | 300046 | 1,32 | up   |
| 5839480 | 7318268 | 1668290 | glycosylphosphatidylinositol anchor attachment protein 1 homolog (yeast) | Gpaa1 | 300046 | 1,09 | up   |
| 5918517 | 7318268 | 1668291 | glycosylphosphatidylinositol anchor attachment protein 1 homolog (yeast) | Gpaa1 | 300046 | 1,26 | down |
| 6189459 | 7318268 | 1668292 | glycosylphosphatidylinositol anchor attachment protein 1 homolog (yeast) | Gpaa1 | 300046 | 2,30 | up   |
| 6274513 | 7318268 | 1668289 | glycosylphosphatidylinositol anchor attachment protein 1 homolog (yeast) | Gpaa1 | 300046 | 1,02 | down |
| 6351486 | 7318268 | 1668281 | glycosylphosphatidylinositol anchor attachment protein 1 homolog (yeast) | Gpaa1 | 300046 | 1,27 | up   |

|         |         |         |                                                                          |        |        |      |      |
|---------|---------|---------|--------------------------------------------------------------------------|--------|--------|------|------|
| 6354854 | 7318268 | 1668285 | glycosylphosphatidylinositol anchor attachment protein 1 homolog (yeast) | Gpaa1  | 300046 | 1,12 | up   |
| 6372370 | 7318268 | 1668283 | glycosylphosphatidylinositol anchor attachment protein 1 homolog (yeast) | Gpaa1  | 300046 | 1,18 | up   |
| 6409369 | 7318268 | 1668287 | glycosylphosphatidylinositol anchor attachment protein 1 homolog (yeast) | Gpaa1  | 300046 | 1,04 | down |
| 6563198 | 7318268 | 1668285 | glycosylphosphatidylinositol anchor attachment protein 1 homolog (yeast) | Gpaa1  | 300046 | 1,58 | down |
| 6570714 | 7318268 | 1668289 | glycosylphosphatidylinositol anchor attachment protein 1 homolog (yeast) | Gpaa1  | 300046 | 1,07 | down |
| 5661687 | 7238199 | 1468912 | golgi autoantigen, golgin subfamily a, 1                                 | Golga1 | 311919 | 1,20 | down |
| 5677552 | 7238199 | 1468914 | golgi autoantigen, golgin subfamily a, 1                                 | Golga1 | 311919 | 1,09 | down |
| 5697133 | 7238199 | 1468934 | golgi autoantigen, golgin subfamily a, 1                                 | Golga1 | 311919 | 1,51 | up   |
| 5703921 | 7238199 | 1468912 | golgi autoantigen, golgin subfamily a, 1                                 | Golga1 | 311919 | 1,39 | down |
| 5829434 | 7238199 | 1468911 | golgi autoantigen, golgin subfamily a, 1                                 | Golga1 | 311919 | 1,16 | down |
| 5887279 | 7238199 | 1468922 | golgi autoantigen, golgin subfamily a, 1                                 | Golga1 | 311919 | 1,16 | up   |
| 5905448 | 7238199 | 1468928 | golgi autoantigen, golgin subfamily a, 1                                 | Golga1 | 311919 | 1,54 | down |
| 6100398 | 7238199 | 1468922 | golgi autoantigen, golgin subfamily a, 1                                 | Golga1 | 311919 | 1,12 | down |
| 6100430 | 7238199 | 1468923 | golgi autoantigen, golgin subfamily a, 1                                 | Golga1 | 311919 | 1,15 | down |
| 6107654 | 7238199 | 1468926 | golgi autoantigen, golgin subfamily a, 1                                 | Golga1 | 311919 | 1,23 | down |
| 6125860 | 7238199 | 1468920 | golgi autoantigen, golgin subfamily a, 1                                 | Golga1 | 311919 | 1,03 | down |
| 6129160 | 7238199 | 1468916 | golgi autoantigen, golgin subfamily a, 1                                 | Golga1 | 311919 | 1,05 | up   |
| 6141347 | 7238199 | 1468930 | golgi autoantigen, golgin subfamily a, 1                                 | Golga1 | 311919 | 1,08 | down |
| 6185113 | 7238199 | 1468910 | golgi autoantigen, golgin subfamily a, 1                                 | Golga1 | 311919 | 1,16 | up   |
| 6210908 | 7238199 | 1468918 | golgi autoantigen, golgin subfamily a, 1                                 | Golga1 | 311919 | 1,42 | down |
| 6278125 | 7238199 | 1468931 | golgi autoantigen, golgin subfamily a, 1                                 | Golga1 | 311919 | 1,21 | down |
| 6318527 | 7238199 | 1468911 | golgi autoantigen, golgin subfamily a, 1                                 | Golga1 | 311919 | 1,04 | down |
| 6325377 | 7238199 | 1468933 | golgi autoantigen, golgin subfamily a, 1                                 | Golga1 | 311919 | 1,06 | up   |
| 6339021 | 7238199 | 1468911 | golgi autoantigen, golgin subfamily a, 1                                 | Golga1 | 311919 | 1,25 | down |
| 6360955 | 7238199 | 1468925 | golgi autoantigen, golgin subfamily a, 1                                 | Golga1 | 311919 | 1,35 | down |
| 6363386 | 7238199 | 1468915 | golgi autoantigen, golgin subfamily a, 1                                 | Golga1 | 311919 | 1,33 | down |
| 6395980 | 7238199 | 1468926 | golgi autoantigen, golgin subfamily a, 1                                 | Golga1 | 311919 | 1,60 | down |
| 6399419 | 7238199 | 1468932 | golgi autoantigen, golgin subfamily a, 1                                 | Golga1 | 311919 | 1,25 | up   |
| 6478237 | 7238199 | 1468927 | golgi autoantigen, golgin subfamily a, 1                                 | Golga1 | 311919 | 1,66 | down |
| 6479641 | 7238199 | 1468929 | golgi autoantigen, golgin subfamily a, 1                                 | Golga1 | 311919 | 1,12 | down |
| 6551217 | 7238199 | 1468924 | golgi autoantigen, golgin subfamily a, 1                                 | Golga1 | 311919 | 1,26 | up   |
| 6659734 | 7238199 | 1468919 | golgi autoantigen, golgin subfamily a, 1                                 | Golga1 | 311919 | 2,90 | down |
| 6664787 | 7238199 | 1468932 | golgi autoantigen, golgin subfamily a, 1                                 | Golga1 | 311919 | 1,12 | up   |
| 6725847 | 7238199 | 1468913 | golgi autoantigen, golgin subfamily a, 1                                 | Golga1 | 311919 | 1,85 | down |
| 6730547 | 7238199 | 1468921 | golgi autoantigen, golgin subfamily a, 1                                 | Golga1 | 311919 | 1,17 | down |
| 5650472 | 7226272 | 1437956 | golgi autoantigen, golgin subfamily a, 2                                 | Golga2 | 64528  | 1,20 | down |
| 5670862 | 7226272 | 1437941 | golgi autoantigen, golgin subfamily a, 2                                 | Golga2 | 64528  | 1,17 | up   |
| 5682693 | 7226272 | 1437962 | golgi autoantigen, golgin subfamily a, 2                                 | Golga2 | 64528  | 1,15 | up   |
| 5685479 | 7226272 | 1437936 | golgi autoantigen, golgin subfamily a, 2                                 | Golga2 | 64528  | 1,08 | down |
| 5771594 | 7226272 | 1437938 | golgi autoantigen, golgin subfamily a, 2                                 | Golga2 | 64528  | 1,29 | down |
| 5847703 | 7226272 | 1437952 | golgi autoantigen, golgin subfamily a, 2                                 | Golga2 | 64528  | 1,27 | down |
| 5854355 | 7226272 | 1437962 | golgi autoantigen, golgin subfamily a, 2                                 | Golga2 | 64528  | 1,33 | up   |
| 5905089 | 7226272 | 1437954 | golgi autoantigen, golgin subfamily a, 2                                 | Golga2 | 64528  | 1,03 | down |
| 5913587 | 7226272 | 1437960 | golgi autoantigen, golgin subfamily a, 2                                 | Golga2 | 64528  | 1,19 | up   |
| 5915401 | 7226272 | 1437959 | golgi autoantigen, golgin subfamily a, 2                                 | Golga2 | 64528  | 1,26 | up   |
| 5927362 | 7226272 | 1437946 | golgi autoantigen, golgin subfamily a, 2                                 | Golga2 | 64528  | 1,06 | up   |
| 5928696 | 7226272 | 1437950 | golgi autoantigen, golgin subfamily a, 2                                 | Golga2 | 64528  | 1,09 | down |
| 5971387 | 7226272 | 1437940 | golgi autoantigen, golgin subfamily a, 2                                 | Golga2 | 64528  | 1,00 | down |
| 6109419 | 7226272 | 1437958 | golgi autoantigen, golgin subfamily a, 2                                 | Golga2 | 64528  | 1,14 | down |
| 6138742 | 7226272 | 1437951 | golgi autoantigen, golgin subfamily a, 2                                 | Golga2 | 64528  | 1,38 | up   |
| 6222660 | 7226272 | 1437957 | golgi autoantigen, golgin subfamily a, 2                                 | Golga2 | 64528  | 1,28 | up   |
| 6255475 | 7226272 | 1437949 | golgi autoantigen, golgin subfamily a, 2                                 | Golga2 | 64528  | 1,38 | up   |
| 6312345 | 7226272 | 1437962 | golgi autoantigen, golgin subfamily a, 2                                 | Golga2 | 64528  | 1,03 | up   |
| 6319141 | 7226272 | 1437953 | golgi autoantigen, golgin subfamily a, 2                                 | Golga2 | 64528  | 1,05 | down |
| 6328152 | 7226272 | 1437944 | golgi autoantigen, golgin subfamily a, 2                                 | Golga2 | 64528  | 2,75 | down |
| 6338537 | 7226272 | 1437948 | golgi autoantigen, golgin subfamily a, 2                                 | Golga2 | 64528  | 1,00 | down |

|         |         |         |                                                                     |            |        |      |      |
|---------|---------|---------|---------------------------------------------------------------------|------------|--------|------|------|
| 6370535 | 7226272 | 1437935 | golgi autoantigen, golgin subfamily a, 2                            | Golga2     | 64528  | 1,06 | down |
| 6462390 | 7226272 | 1437961 | golgi autoantigen, golgin subfamily a, 2                            | Golga2     | 64528  | 1,14 | up   |
| 6464380 | 7226272 | 1437945 | golgi autoantigen, golgin subfamily a, 2                            | Golga2     | 64528  | 1,02 | down |
| 6464949 | 7226272 | 1437955 | golgi autoantigen, golgin subfamily a, 2                            | Golga2     | 64528  | 1,35 | down |
| 6491354 | 7226272 | 1437943 | golgi autoantigen, golgin subfamily a, 2                            | Golga2     | 64528  | 1,47 | down |
| 6608775 | 7226272 | 1437939 | golgi autoantigen, golgin subfamily a, 2                            | Golga2     | 64528  | 1,13 | up   |
| 6645760 | 7226272 | 1437942 | golgi autoantigen, golgin subfamily a, 2                            | Golga2     | 64528  | 1,10 | up   |
| 6675634 | 7226272 | 1437937 | golgi autoantigen, golgin subfamily a, 2                            | Golga2     | 64528  | 1,09 | down |
| 5644711 | 7225370 | 1435508 | G-protein signaling modulator 1 (AGS3-like, C. elegans)             | Gpsm1      | 246254 | 1,82 | up   |
| 5655391 | 7225370 | 1435513 | G-protein signaling modulator 1 (AGS3-like, C. elegans)             | Gpsm1      | 246254 | 1,28 | up   |
| 5681552 | 7225370 | 1435517 | G-protein signaling modulator 1 (AGS3-like, C. elegans)             | Gpsm1      | 246254 | 1,39 | down |
| 5763792 | 7225370 | 1435521 | G-protein signaling modulator 1 (AGS3-like, C. elegans)             | Gpsm1      | 246254 | 1,16 | down |
| 5840766 | 7225370 | 1435512 | G-protein signaling modulator 1 (AGS3-like, C. elegans)             | Gpsm1      | 246254 | 1,20 | down |
| 5886276 | 7225370 | 1435516 | G-protein signaling modulator 1 (AGS3-like, C. elegans)             | Gpsm1      | 246254 | 1,08 | up   |
| 5912529 | 7225370 | 1435508 | G-protein signaling modulator 1 (AGS3-like, C. elegans)             | Gpsm1      | 246254 | 1,04 | down |
| 5927520 | 7225370 | 1435509 | G-protein signaling modulator 1 (AGS3-like, C. elegans)             | Gpsm1      | 246254 | 2,05 | up   |
| 5941214 | 7225370 | 1435510 | G-protein signaling modulator 1 (AGS3-like, C. elegans)             | Gpsm1      | 246254 | 1,62 | up   |
| 6125603 | 7225370 | 1435522 | G-protein signaling modulator 1 (AGS3-like, C. elegans)             | Gpsm1      | 246254 | 1,09 | down |
| 6132089 | 7225370 | 1435520 | G-protein signaling modulator 1 (AGS3-like, C. elegans)             | Gpsm1      | 246254 | 1,19 | down |
| 6172595 | 7225370 | 1435515 | G-protein signaling modulator 1 (AGS3-like, C. elegans)             | Gpsm1      | 246254 | 1,96 | up   |
| 6228702 | 7225370 | 1435519 | G-protein signaling modulator 1 (AGS3-like, C. elegans)             | Gpsm1      | 246254 | 1,01 | up   |
| 6309485 | 7225370 | 1435519 | G-protein signaling modulator 1 (AGS3-like, C. elegans)             | Gpsm1      | 246254 | 1,30 | down |
| 6501212 | 7225370 | 1435514 | G-protein signaling modulator 1 (AGS3-like, C. elegans)             | Gpsm1      | 246254 | 1,60 | up   |
| 6534917 | 7225370 | 1435518 | G-protein signaling modulator 1 (AGS3-like, C. elegans)             | Gpsm1      | 246254 | 1,15 | down |
| 6640138 | 7225370 | 1435511 | G-protein signaling modulator 1 (AGS3-like, C. elegans)             | Gpsm1      | 246254 | 1,86 | down |
| 6735653 | 7225370 | 1435522 | G-protein signaling modulator 1 (AGS3-like, C. elegans)             | Gpsm1      | 246254 | 1,38 | down |
| 5907498 | 7088164 | 1098458 | GRAM domain containing 1C                                           | Gramd1c    | 360717 | 1,41 | up   |
| 5624709 | 7184026 | 1335672 | growth arrest and DNA-damage-inducible, gamma interacting protein 1 | Gadd45gip1 | 288916 | 1,53 | up   |
| 5738560 | 7184026 | 1335671 | growth arrest and DNA-damage-inducible, gamma interacting protein 1 | Gadd45gip1 | 288916 | 1,34 | up   |
| 5777514 | 7184026 | 1335673 | growth arrest and DNA-damage-inducible, gamma interacting protein 1 | Gadd45gip1 | 288916 | 1,06 | down |
| 5898403 | 7184026 | 1335672 | growth arrest and DNA-damage-inducible, gamma interacting protein 1 | Gadd45gip1 | 288916 | 1,24 | down |
| 6059206 | 7184026 | 1335671 | growth arrest and DNA-damage-inducible, gamma interacting protein 1 | Gadd45gip1 | 288916 | 1,50 | down |
| 6392477 | 7184026 | 1335671 | growth arrest and DNA-damage-inducible, gamma interacting protein 1 | Gadd45gip1 | 288916 | 3,11 | down |
| 6567906 | 7184026 | 1335672 | growth arrest and DNA-damage-inducible, gamma interacting protein 1 | Gadd45gip1 | 288916 | 1,10 | down |
| 5680263 | 7127797 | 1195853 | growth arrest-specific 2 like 1                                     | Gas2l1     | 360973 | 1,09 | up   |
| 5978055 | 7127797 | 1195853 | growth arrest-specific 2 like 1                                     | Gas2l1     | 360973 | 1,09 | down |
| 6129235 | 7127797 | 1195851 | growth arrest-specific 2 like 1                                     | Gas2l1     | 360973 | 1,09 | down |
| 6149135 | 7127797 | 1195854 | growth arrest-specific 2 like 1                                     | Gas2l1     | 360973 | 1,01 | down |
| 6179534 | 7127797 | 1195851 | growth arrest-specific 2 like 1                                     | Gas2l1     | 360973 | 2,41 | down |
| 6238451 | 7127797 | 1195856 | growth arrest-specific 2 like 1                                     | Gas2l1     | 360973 | 1,03 | up   |
| 6333228 | 7127797 | 1195856 | growth arrest-specific 2 like 1                                     | Gas2l1     | 360973 | 1,38 | down |
| 6392968 | 7127797 | 1195854 | growth arrest-specific 2 like 1                                     | Gas2l1     | 360973 | 1,08 | up   |
| 6417141 | 7127797 | 1195855 | growth arrest-specific 2 like 1                                     | Gas2l1     | 360973 | 1,25 | up   |
| 5643104 | 7115972 | 1167093 | growth factor independent 1 transcription repressor                 | Gfi1       | 24388  | 1,16 | up   |
| 5685850 | 7115972 | 1167090 | growth factor independent 1 transcription repressor                 | Gfi1       | 24388  | 1,05 | up   |
| 5776932 | 7115972 | 1167094 | growth factor independent 1 transcription repressor                 | Gfi1       | 24388  | 2,04 | down |
| 6138680 | 7115972 | 1167092 | growth factor independent 1 transcription repressor                 | Gfi1       | 24388  | 1,38 | down |
| 6148939 | 7115972 | 1167095 | growth factor independent 1 transcription repressor                 | Gfi1       | 24388  | 1,07 | down |
| 6197443 | 7115972 | 1167089 | growth factor independent 1 transcription repressor                 | Gfi1       | 24388  | 1,47 | up   |
| 6317898 | 7115972 | 1167094 | growth factor independent 1 transcription repressor                 | Gfi1       | 24388  | 1,15 | down |
| 6436118 | 7115972 | 1167091 | growth factor independent 1 transcription repressor                 | Gfi1       | 24388  | 1,05 | up   |
| 5652366 | 7075371 | 1069136 | growth factor, augmenter of liver regeneration                      | Gfer       | 27100  | 2,34 | down |
| 5751669 | 7075371 | 1069133 | growth factor, augmenter of liver regeneration                      | Gfer       | 27100  | 1,26 | up   |
| 5891488 | 7075371 | 1069132 | growth factor, augmenter of liver regeneration                      | Gfer       | 27100  | 1,33 | up   |
| 6020432 | 7075371 | 1069134 | growth factor, augmenter of liver regeneration                      | Gfer       | 27100  | 1,29 | up   |
| 6052010 | 7075371 | 1069136 | growth factor, augmenter of liver regeneration                      | Gfer       | 27100  | 2,73 | down |

|         |         |         |                                                                             |        |        |      |      |
|---------|---------|---------|-----------------------------------------------------------------------------|--------|--------|------|------|
| 6212758 | 7075371 | 1069135 | growth factor, augmenter of liver regeneration                              | Gfer   | 27100  | 1,23 | up   |
| 6685472 | 7075371 | 1069135 | growth factor, augmenter of liver regeneration                              | Gfer   | 27100  | 1,43 | down |
| 5617709 | 7254053 | 1507650 | growth hormone releasing hormone receptor                                   | Ghrhr  | 25321  | 1,37 | up   |
| 5685655 | 7254053 | 1507641 | growth hormone releasing hormone receptor                                   | Ghrhr  | 25321  | 2,02 | up   |
| 5758501 | 7254053 | 1507645 | growth hormone releasing hormone receptor                                   | Ghrhr  | 25321  | 1,57 | up   |
| 5915996 | 7254053 | 1507649 | growth hormone releasing hormone receptor                                   | Ghrhr  | 25321  | 2,91 | up   |
| 5929495 | 7254053 | 1507652 | growth hormone releasing hormone receptor                                   | Ghrhr  | 25321  | 1,07 | up   |
| 6008238 | 7254053 | 1507640 | growth hormone releasing hormone receptor                                   | Ghrhr  | 25321  | 1,20 | down |
| 6175025 | 7254053 | 1507652 | growth hormone releasing hormone receptor                                   | Ghrhr  | 25321  | 1,11 | down |
| 6232899 | 7254053 | 1507651 | growth hormone releasing hormone receptor                                   | Ghrhr  | 25321  | 1,21 | up   |
| 6237163 | 7254053 | 1507639 | growth hormone releasing hormone receptor                                   | Ghrhr  | 25321  | 1,12 | up   |
| 6305004 | 7254053 | 1507638 | growth hormone releasing hormone receptor                                   | Ghrhr  | 25321  | 1,21 | down |
| 6383772 | 7254053 | 1507649 | growth hormone releasing hormone receptor                                   | Ghrhr  | 25321  | 1,56 | up   |
| 6578067 | 7254053 | 1507644 | growth hormone releasing hormone receptor                                   | Ghrhr  | 25321  | 1,55 | up   |
| 6596016 | 7254053 | 1507652 | growth hormone releasing hormone receptor                                   | Ghrhr  | 25321  | 1,08 | up   |
| 6616927 | 7254053 | 1507643 | growth hormone releasing hormone receptor                                   | Ghrhr  | 25321  | 1,24 | down |
| 6660261 | 7254053 | 1507647 | growth hormone releasing hormone receptor                                   | Ghrhr  | 25321  | 1,63 | up   |
| 6676718 | 7254053 | 1507646 | growth hormone releasing hormone receptor                                   | Ghrhr  | 25321  | 1,02 | down |
| 6691460 | 7254053 | 1507642 | growth hormone releasing hormone receptor                                   | Ghrhr  | 25321  | 1,61 | down |
| 5756576 | 7320895 | 1674537 | GRP1 (general receptor for phosphoinositides 1)-associated scaffold protein | Grasp  | 192254 | 1,17 | down |
| 5765220 | 7320895 | 1674541 | GRP1 (general receptor for phosphoinositides 1)-associated scaffold protein | Grasp  | 192254 | 1,02 | down |
| 5833826 | 7320895 | 1674541 | GRP1 (general receptor for phosphoinositides 1)-associated scaffold protein | Grasp  | 192254 | 1,01 | down |
| 5848791 | 7320895 | 1674542 | GRP1 (general receptor for phosphoinositides 1)-associated scaffold protein | Grasp  | 192254 | 1,02 | up   |
| 6111985 | 7320895 | 1674538 | GRP1 (general receptor for phosphoinositides 1)-associated scaffold protein | Grasp  | 192254 | 1,32 | up   |
| 6194738 | 7320895 | 1674540 | GRP1 (general receptor for phosphoinositides 1)-associated scaffold protein | Grasp  | 192254 | 1,81 | up   |
| 6240539 | 7320895 | 1674534 | GRP1 (general receptor for phosphoinositides 1)-associated scaffold protein | Grasp  | 192254 | 2,79 | down |
| 6303743 | 7320895 | 1674535 | GRP1 (general receptor for phosphoinositides 1)-associated scaffold protein | Grasp  | 192254 | 1,10 | down |
| 6430058 | 7320895 | 1674534 | GRP1 (general receptor for phosphoinositides 1)-associated scaffold protein | Grasp  | 192254 | 1,07 | down |
| 6704636 | 7320895 | 1674536 | GRP1 (general receptor for phosphoinositides 1)-associated scaffold protein | Grasp  | 192254 | 1,45 | up   |
| 6713482 | 7320895 | 1674539 | GRP1 (general receptor for phosphoinositides 1)-associated scaffold protein | Grasp  | 192254 | 1,25 | down |
| 5705955 | 7159177 | 1273342 | GTP binding protein 4                                                       | Gtpbp4 | 114300 | 1,04 | down |
| 5766160 | 7159177 | 1273341 | GTP binding protein 4                                                       | Gtpbp4 | 114300 | 1,00 | up   |
| 5892654 | 7159177 | 1273347 | GTP binding protein 4                                                       | Gtpbp4 | 114300 | 1,27 | down |
| 5975410 | 7159177 | 1273333 | GTP binding protein 4                                                       | Gtpbp4 | 114300 | 1,55 | up   |
| 6064424 | 7159177 | 1273334 | GTP binding protein 4                                                       | Gtpbp4 | 114300 | 1,21 | up   |
| 6156301 | 7159177 | 1273340 | GTP binding protein 4                                                       | Gtpbp4 | 114300 | 1,26 | up   |
| 6191770 | 7159177 | 1273336 | GTP binding protein 4                                                       | Gtpbp4 | 114300 | 1,14 | up   |
| 6289781 | 7159177 | 1273343 | GTP binding protein 4                                                       | Gtpbp4 | 114300 | 1,04 | down |
| 6296372 | 7159177 | 1273331 | GTP binding protein 4                                                       | Gtpbp4 | 114300 | 1,37 | down |
| 6335183 | 7159177 | 1273332 | GTP binding protein 4                                                       | Gtpbp4 | 114300 | 2,54 | down |
| 6611881 | 7159177 | 1273337 | GTP binding protein 4                                                       | Gtpbp4 | 114300 | 1,25 | down |
| 6612000 | 7159177 | 1273345 | GTP binding protein 4                                                       | Gtpbp4 | 114300 | 1,51 | up   |
| 6669854 | 7159177 | 1273346 | GTP binding protein 4                                                       | Gtpbp4 | 114300 | 1,39 | down |
| 6692327 | 7159177 | 1273348 | GTP binding protein 4                                                       | Gtpbp4 | 114300 | 1,16 | down |
| 5650378 | 7171525 | 1303452 | guanine nucleotide binding protein, alpha stimulating, olfactory type       | Gnal   | 24611  | 1,03 | down |
| 5653102 | 7171525 | 1303453 | guanine nucleotide binding protein, alpha stimulating, olfactory type       | Gnal   | 24611  | 1,07 | down |
| 5697822 | 7171525 | 1303452 | guanine nucleotide binding protein, alpha stimulating, olfactory type       | Gnal   | 24611  | 1,20 | down |
| 5830602 | 7171525 | 1303465 | guanine nucleotide binding protein, alpha stimulating, olfactory type       | Gnal   | 24611  | 1,54 | up   |
| 5875309 | 7171525 | 1303484 | guanine nucleotide binding protein, alpha stimulating, olfactory type       | Gnal   | 24611  | 1,14 | up   |
| 6046903 | 7171525 | 1303452 | guanine nucleotide binding protein, alpha stimulating, olfactory type       | Gnal   | 24611  | 1,05 | down |
| 6090806 | 7171525 | 1303484 | guanine nucleotide binding protein, alpha stimulating, olfactory type       | Gnal   | 24611  | 1,22 | up   |
| 6093012 | 7171525 | 1303477 | guanine nucleotide binding protein, alpha stimulating, olfactory type       | Gnal   | 24611  | 1,28 | up   |
| 6117195 | 7171525 | 1303480 | guanine nucleotide binding protein, alpha stimulating, olfactory type       | Gnal   | 24611  | 1,19 | down |
| 6166360 | 7171525 | 1303454 | guanine nucleotide binding protein, alpha stimulating, olfactory type       | Gnal   | 24611  | 1,01 | down |
| 6171811 | 7171525 | 1303452 | guanine nucleotide binding protein, alpha stimulating, olfactory type       | Gnal   | 24611  | 1,03 | down |
| 6275387 | 7171525 | 1303479 | guanine nucleotide binding protein, alpha stimulating, olfactory type       | Gnal   | 24611  | 1,42 | down |



|         |         |         |                                                                       |         |        |       |      |
|---------|---------|---------|-----------------------------------------------------------------------|---------|--------|-------|------|
| 6321577 | 7171525 | 1303483 | guanine nucleotide binding protein, alpha stimulating, olfactory type | Gnal    | 24611  | 2,03  | up   |
| 6327451 | 7171525 | 1303482 | guanine nucleotide binding protein, alpha stimulating, olfactory type | Gnal    | 24611  | 1,01  | down |
| 6369824 | 7171525 | 1303481 | guanine nucleotide binding protein, alpha stimulating, olfactory type | Gnal    | 24611  | 1,07  | down |
| 6500045 | 7171525 | 1303455 | guanine nucleotide binding protein, alpha stimulating, olfactory type | Gnal    | 24611  | 1,01  | up   |
| 5775625 | 7148721 | 1247795 | guanine nucleotide binding protein-like 3 (nucleolar)                 | Gnl3    | 290556 | 1,46  | up   |
| 5869361 | 7148721 | 1247788 | guanine nucleotide binding protein-like 3 (nucleolar)                 | Gnl3    | 290556 | 1,18  | up   |
| 5895938 | 7148721 | 1247794 | guanine nucleotide binding protein-like 3 (nucleolar)                 | Gnl3    | 290556 | 1,16  | up   |
| 5975346 | 7148721 | 1247789 | guanine nucleotide binding protein-like 3 (nucleolar)                 | Gnl3    | 290556 | 1,22  | down |
| 6013226 | 7148721 | 1247790 | guanine nucleotide binding protein-like 3 (nucleolar)                 | Gnl3    | 290556 | 1,05  | down |
| 6039232 | 7148721 | 1247785 | guanine nucleotide binding protein-like 3 (nucleolar)                 | Gnl3    | 290556 | 1,53  | up   |
| 6049385 | 7148721 | 1247793 | guanine nucleotide binding protein-like 3 (nucleolar)                 | Gnl3    | 290556 | 1,20  | down |
| 6055813 | 7148721 | 1247791 | guanine nucleotide binding protein-like 3 (nucleolar)                 | Gnl3    | 290556 | 1,43  | down |
| 6086888 | 7148721 | 1247782 | guanine nucleotide binding protein-like 3 (nucleolar)                 | Gnl3    | 290556 | 1,36  | down |
| 6278081 | 7148721 | 1247783 | guanine nucleotide binding protein-like 3 (nucleolar)                 | Gnl3    | 290556 | 1,86  | down |
| 6315913 | 7148721 | 1247792 | guanine nucleotide binding protein-like 3 (nucleolar)                 | Gnl3    | 290556 | 1,35  | down |
| 6317045 | 7148721 | 1247786 | guanine nucleotide binding protein-like 3 (nucleolar)                 | Gnl3    | 290556 | 2,45  | down |
| 6372384 | 7148721 | 1247796 | guanine nucleotide binding protein-like 3 (nucleolar)                 | Gnl3    | 290556 | 1,02  | up   |
| 6452277 | 7148721 | 1247784 | guanine nucleotide binding protein-like 3 (nucleolar)                 | Gnl3    | 290556 | 1,23  | down |
| 6632659 | 7148721 | 1247787 | guanine nucleotide binding protein-like 3 (nucleolar)                 | Gnl3    | 290556 | 1,10  | up   |
| 5726773 | 7200128 | 1375989 | guanylate binding protein 2                                           | Gbp2    | 171164 | 2,31  | up   |
| 5891968 | 7200128 | 1375981 | guanylate binding protein 2                                           | Gbp2    | 171164 | 14,07 | down |
| 5963536 | 7200128 | 1375983 | guanylate binding protein 2                                           | Gbp2    | 171164 | 2,28  | up   |
| 6176140 | 7200128 | 1375987 | guanylate binding protein 2                                           | Gbp2    | 171164 | 2,25  | down |
| 6215275 | 7200128 | 1375986 | guanylate binding protein 2                                           | Gbp2    | 171164 | 1,35  | down |
| 6274914 | 7200128 | 1375990 | guanylate binding protein 2                                           | Gbp2    | 171164 | 1,34  | down |
| 6296413 | 7200128 | 1375984 | guanylate binding protein 2                                           | Gbp2    | 171164 | 1,80  | down |
| 6355647 | 7200128 | 1375985 | guanylate binding protein 2                                           | Gbp2    | 171164 | 2,49  | up   |
| 6391060 | 7200128 | 1375988 | guanylate binding protein 2                                           | Gbp2    | 171164 | 1,60  | up   |
| 6407077 | 7200128 | 1375990 | guanylate binding protein 2                                           | Gbp2    | 171164 | 2,41  | up   |
| 6468900 | 7200128 | 1375982 | guanylate binding protein 2                                           | Gbp2    | 171164 | 2,75  | down |
| 5881429 | 7139007 | 1223465 | guanylate cyclase 1, soluble, beta 2                                  | Gucy1b2 | 25206  | 1,57  | down |
| 5952515 | 7139007 | 1223464 | guanylate cyclase 1, soluble, beta 2                                  | Gucy1b2 | 25206  | 1,01  | up   |
| 5962111 | 7139007 | 1223455 | guanylate cyclase 1, soluble, beta 2                                  | Gucy1b2 | 25206  | 1,03  | up   |
| 6123821 | 7139007 | 1223462 | guanylate cyclase 1, soluble, beta 2                                  | Gucy1b2 | 25206  | 1,05  | down |
| 6125071 | 7139007 | 1223468 | guanylate cyclase 1, soluble, beta 2                                  | Gucy1b2 | 25206  | 1,00  | up   |
| 6141868 | 7139007 | 1223463 | guanylate cyclase 1, soluble, beta 2                                  | Gucy1b2 | 25206  | 1,12  | down |
| 6173311 | 7139007 | 1223455 | guanylate cyclase 1, soluble, beta 2                                  | Gucy1b2 | 25206  | 1,05  | down |
| 6261391 | 7139007 | 1223462 | guanylate cyclase 1, soluble, beta 2                                  | Gucy1b2 | 25206  | 1,54  | down |
| 6317398 | 7139007 | 1223457 | guanylate cyclase 1, soluble, beta 2                                  | Gucy1b2 | 25206  | 1,51  | down |
| 6370904 | 7139007 | 1223454 | guanylate cyclase 1, soluble, beta 2                                  | Gucy1b2 | 25206  | 1,22  | up   |
| 6399899 | 7139007 | 1223459 | guanylate cyclase 1, soluble, beta 2                                  | Gucy1b2 | 25206  | 1,54  | up   |
| 6408002 | 7139007 | 1223456 | guanylate cyclase 1, soluble, beta 2                                  | Gucy1b2 | 25206  | 1,15  | up   |
| 6435139 | 7139007 | 1223466 | guanylate cyclase 1, soluble, beta 2                                  | Gucy1b2 | 25206  | 1,04  | up   |
| 6447067 | 7139007 | 1223460 | guanylate cyclase 1, soluble, beta 2                                  | Gucy1b2 | 25206  | 1,10  | down |
| 6462693 | 7139007 | 1223467 | guanylate cyclase 1, soluble, beta 2                                  | Gucy1b2 | 25206  | 2,06  | up   |
| 6488436 | 7139007 | 1223461 | guanylate cyclase 1, soluble, beta 2                                  | Gucy1b2 | 25206  | 1,09  | down |
| 6530247 | 7139007 | 1223458 | guanylate cyclase 1, soluble, beta 2                                  | Gucy1b2 | 25206  | 1,54  | down |
| 6717094 | 7139007 | 1223468 | guanylate cyclase 1, soluble, beta 2                                  | Gucy1b2 | 25206  | 1,05  | down |
| 6741185 | 7139007 | 1223465 | guanylate cyclase 1, soluble, beta 2                                  | Gucy1b2 | 25206  | 1,24  | up   |
| 6056662 | 7359460 | 1768474 | guanylate cyclase activator 1B                                        | Guca1b  | 316218 | 1,78  | down |
| 6062136 | 7359460 | 1768474 | guanylate cyclase activator 1B                                        | Guca1b  | 316218 | 1,05  | up   |
| 6382798 | 7359460 | 1768468 | guanylate cyclase activator 1B                                        | Guca1b  | 316218 | 2,07  | down |
| 6399750 | 7359460 | 1768470 | guanylate cyclase activator 1B                                        | Guca1b  | 316218 | 1,66  | down |
| 6409661 | 7359460 | 1768467 | guanylate cyclase activator 1B                                        | Guca1b  | 316218 | 1,38  | up   |
| 6419861 | 7359460 | 1768469 | guanylate cyclase activator 1B                                        | Guca1b  | 316218 | 1,29  | down |
| 6673745 | 7359460 | 1768468 | guanylate cyclase activator 1B                                        | Guca1b  | 316218 | 1,49  | down |

|         |         |         |                                                  |        |        |      |      |
|---------|---------|---------|--------------------------------------------------|--------|--------|------|------|
| 5626262 | 7354126 | 1755055 | GULP, engulfment adaptor PTB domain containing 1 | Gulp1  | 314543 | 1,08 | up   |
| 5631808 | 7354126 | 1755062 | GULP, engulfment adaptor PTB domain containing 1 | Gulp1  | 314543 | 1,29 | up   |
| 5728849 | 7354126 | 1755052 | GULP, engulfment adaptor PTB domain containing 1 | Gulp1  | 314543 | 1,00 | up   |
| 5808976 | 7354126 | 1755061 | GULP, engulfment adaptor PTB domain containing 1 | Gulp1  | 314543 | 1,16 | down |
| 6035526 | 7354126 | 1755053 | GULP, engulfment adaptor PTB domain containing 1 | Gulp1  | 314543 | 1,06 | up   |
| 6123197 | 7354126 | 1755059 | GULP, engulfment adaptor PTB domain containing 1 | Gulp1  | 314543 | 1,02 | up   |
| 6285560 | 7354126 | 1755052 | GULP, engulfment adaptor PTB domain containing 1 | Gulp1  | 314543 | 1,09 | up   |
| 6522773 | 7354126 | 1755056 | GULP, engulfment adaptor PTB domain containing 1 | Gulp1  | 314543 | 1,38 | up   |
| 6537297 | 7354126 | 1755057 | GULP, engulfment adaptor PTB domain containing 1 | Gulp1  | 314543 | 1,20 | up   |
| 6696470 | 7354126 | 1755054 | GULP, engulfment adaptor PTB domain containing 1 | Gulp1  | 314543 | 1,62 | down |
| 6698763 | 7354126 | 1755060 | GULP, engulfment adaptor PTB domain containing 1 | Gulp1  | 314543 | 2,03 | down |
| 6718596 | 7354126 | 1755058 | GULP, engulfment adaptor PTB domain containing 1 | Gulp1  | 314543 | 1,16 | down |
| 5717616 | 7222873 | 1429837 | H2A histone family, member Y2                    | H2afy2 | 361844 | 1,15 | up   |
| 5790905 | 7222873 | 1429831 | H2A histone family, member Y2                    | H2afy2 | 361844 | 1,12 | up   |
| 5946919 | 7222873 | 1429840 | H2A histone family, member Y2                    | H2afy2 | 361844 | 2,55 | down |
| 6027286 | 7222873 | 1429835 | H2A histone family, member Y2                    | H2afy2 | 361844 | 1,12 | up   |
| 6093380 | 7222873 | 1429842 | H2A histone family, member Y2                    | H2afy2 | 361844 | 1,05 | up   |
| 6192006 | 7222873 | 1429833 | H2A histone family, member Y2                    | H2afy2 | 361844 | 1,30 | up   |
| 6312138 | 7222873 | 1429840 | H2A histone family, member Y2                    | H2afy2 | 361844 | 1,81 | down |
| 6411735 | 7222873 | 1429838 | H2A histone family, member Y2                    | H2afy2 | 361844 | 1,08 | down |
| 6445864 | 7222873 | 1429831 | H2A histone family, member Y2                    | H2afy2 | 361844 | 1,31 | down |
| 6549935 | 7222873 | 1429839 | H2A histone family, member Y2                    | H2afy2 | 361844 | 1,18 | up   |
| 6577869 | 7222873 | 1429832 | H2A histone family, member Y2                    | H2afy2 | 361844 | 1,12 | up   |
| 5833451 | 7033451 | 969773  | HD domain containing 3                           | Hddc3  | 308758 | 1,11 | down |
| 5970147 | 7033451 | 969772  | HD domain containing 3                           | Hddc3  | 308758 | 1,28 | up   |
| 6232949 | 7033451 | 969773  | HD domain containing 3                           | Hddc3  | 308758 | 2,52 | down |
| 6293585 | 7033451 | 969772  | HD domain containing 3                           | Hddc3  | 308758 | 1,05 | down |
| 6302974 | 7033451 | 969773  | HD domain containing 3                           | Hddc3  | 308758 | 1,54 | up   |
| 6384189 | 7033451 | 969774  | HD domain containing 3                           | Hddc3  | 308758 | 1,73 | down |
| 5671940 | 7165954 | 1288770 | HEAT repeat containing 1                         | Heatr1 | 361262 | 1,31 | down |
| 5696490 | 7165954 | 1288770 | HEAT repeat containing 1                         | Heatr1 | 361262 | 1,08 | down |
| 5699753 | 7165954 | 1288799 | HEAT repeat containing 1                         | Heatr1 | 361262 | 1,37 | down |
| 5701616 | 7165954 | 1288800 | HEAT repeat containing 1                         | Heatr1 | 361262 | 1,12 | down |
| 5702934 | 7165954 | 1288790 | HEAT repeat containing 1                         | Heatr1 | 361262 | 1,63 | up   |
| 5704186 | 7165954 | 1288776 | HEAT repeat containing 1                         | Heatr1 | 361262 | 1,21 | down |
| 5705766 | 7165954 | 1288789 | HEAT repeat containing 1                         | Heatr1 | 361262 | 1,32 | down |
| 5719450 | 7165954 | 1288778 | HEAT repeat containing 1                         | Heatr1 | 361262 | 1,13 | up   |
| 5799331 | 7165954 | 1288787 | HEAT repeat containing 1                         | Heatr1 | 361262 | 1,00 | up   |
| 5813573 | 7165954 | 1288809 | HEAT repeat containing 1                         | Heatr1 | 361262 | 1,40 | up   |
| 5856730 | 7165954 | 1288774 | HEAT repeat containing 1                         | Heatr1 | 361262 | 1,17 | down |
| 5898308 | 7165954 | 1288796 | HEAT repeat containing 1                         | Heatr1 | 361262 | 1,19 | down |
| 5921449 | 7165954 | 1288792 | HEAT repeat containing 1                         | Heatr1 | 361262 | 1,15 | down |
| 5949913 | 7165954 | 1288795 | HEAT repeat containing 1                         | Heatr1 | 361262 | 1,02 | down |
| 5955765 | 7165954 | 1288808 | HEAT repeat containing 1                         | Heatr1 | 361262 | 1,23 | up   |
| 5959538 | 7165954 | 1288785 | HEAT repeat containing 1                         | Heatr1 | 361262 | 1,53 | up   |
| 5964900 | 7165954 | 1288780 | HEAT repeat containing 1                         | Heatr1 | 361262 | 1,55 | up   |
| 5988057 | 7165954 | 1288772 | HEAT repeat containing 1                         | Heatr1 | 361262 | 1,06 | down |
| 5990945 | 7165954 | 1288769 | HEAT repeat containing 1                         | Heatr1 | 361262 | 1,23 | down |
| 6052672 | 7165954 | 1288793 | HEAT repeat containing 1                         | Heatr1 | 361262 | 1,54 | up   |
| 6112305 | 7165954 | 1288801 | HEAT repeat containing 1                         | Heatr1 | 361262 | 1,10 | down |
| 6128725 | 7165954 | 1288783 | HEAT repeat containing 1                         | Heatr1 | 361262 | 1,97 | up   |
| 6229149 | 7165954 | 1288773 | HEAT repeat containing 1                         | Heatr1 | 361262 | 1,54 | down |
| 6293794 | 7165954 | 1288802 | HEAT repeat containing 1                         | Heatr1 | 361262 | 1,04 | up   |
| 6302089 | 7165954 | 1288791 | HEAT repeat containing 1                         | Heatr1 | 361262 | 1,13 | down |
| 6311827 | 7165954 | 1288767 | HEAT repeat containing 1                         | Heatr1 | 361262 | 1,44 | down |
| 6332586 | 7165954 | 1288770 | HEAT repeat containing 1                         | Heatr1 | 361262 | 1,14 | up   |

|         |         |         |                              |         |        |      |      |
|---------|---------|---------|------------------------------|---------|--------|------|------|
| 6341492 | 7165954 | 1288767 | HEAT repeat containing 1     | Heatr1  | 361262 | 1,53 | down |
| 6343385 | 7165954 | 1288768 | HEAT repeat containing 1     | Heatr1  | 361262 | 1,13 | up   |
| 6392341 | 7165954 | 1288775 | HEAT repeat containing 1     | Heatr1  | 361262 | 1,15 | down |
| 6403602 | 7165954 | 1288803 | HEAT repeat containing 1     | Heatr1  | 361262 | 1,15 | up   |
| 6413046 | 7165954 | 1288794 | HEAT repeat containing 1     | Heatr1  | 361262 | 1,10 | up   |
| 6422677 | 7165954 | 1288770 | HEAT repeat containing 1     | Heatr1  | 361262 | 1,84 | up   |
| 6450855 | 7165954 | 1288786 | HEAT repeat containing 1     | Heatr1  | 361262 | 1,24 | up   |
| 6456481 | 7165954 | 1288807 | HEAT repeat containing 1     | Heatr1  | 361262 | 1,21 | down |
| 6513037 | 7165954 | 1288770 | HEAT repeat containing 1     | Heatr1  | 361262 | 1,14 | down |
| 6530971 | 7165954 | 1288797 | HEAT repeat containing 1     | Heatr1  | 361262 | 1,42 | up   |
| 6537365 | 7165954 | 1288782 | HEAT repeat containing 1     | Heatr1  | 361262 | 1,14 | down |
| 6539548 | 7165954 | 1288804 | HEAT repeat containing 1     | Heatr1  | 361262 | 1,12 | up   |
| 6601536 | 7165954 | 1288777 | HEAT repeat containing 1     | Heatr1  | 361262 | 1,02 | down |
| 6611940 | 7165954 | 1288784 | HEAT repeat containing 1     | Heatr1  | 361262 | 1,15 | up   |
| 6613783 | 7165954 | 1288805 | HEAT repeat containing 1     | Heatr1  | 361262 | 1,19 | up   |
| 6636199 | 7165954 | 1288806 | HEAT repeat containing 1     | Heatr1  | 361262 | 1,08 | down |
| 6645165 | 7165954 | 1288803 | HEAT repeat containing 1     | Heatr1  | 361262 | 1,40 | down |
| 6690030 | 7165954 | 1288788 | HEAT repeat containing 1     | Heatr1  | 361262 | 1,06 | down |
| 6690619 | 7165954 | 1288798 | HEAT repeat containing 1     | Heatr1  | 361262 | 1,07 | down |
| 5739598 | 7064220 | 1041734 | heat shock 70kDa protein 12A | Hspa12a | 307997 | 1,25 | down |
| 5767621 | 7064220 | 1041751 | heat shock 70kDa protein 12A | Hspa12a | 307997 | 1,29 | up   |
| 5935312 | 7064220 | 1041751 | heat shock 70kDa protein 12A | Hspa12a | 307997 | 1,01 | down |
| 5940272 | 7064220 | 1041744 | heat shock 70kDa protein 12A | Hspa12a | 307997 | 1,00 | up   |
| 5941533 | 7064220 | 1041731 | heat shock 70kDa protein 12A | Hspa12a | 307997 | 1,15 | down |
| 5971595 | 7064220 | 1041728 | heat shock 70kDa protein 12A | Hspa12a | 307997 | 1,78 | up   |
| 6079261 | 7064220 | 1041741 | heat shock 70kDa protein 12A | Hspa12a | 307997 | 1,47 | down |
| 6151830 | 7064220 | 1041730 | heat shock 70kDa protein 12A | Hspa12a | 307997 | 2,01 | up   |
| 6177887 | 7064220 | 1041729 | heat shock 70kDa protein 12A | Hspa12a | 307997 | 1,23 | up   |
| 6292698 | 7064220 | 1041740 | heat shock 70kDa protein 12A | Hspa12a | 307997 | 1,12 | up   |
| 6318867 | 7064220 | 1041742 | heat shock 70kDa protein 12A | Hspa12a | 307997 | 1,02 | down |
| 6389830 | 7064220 | 1041743 | heat shock 70kDa protein 12A | Hspa12a | 307997 | 1,59 | up   |
| 6499998 | 7064220 | 1041727 | heat shock 70kDa protein 12A | Hspa12a | 307997 | 1,00 | up   |
| 6548320 | 7064220 | 1041726 | heat shock 70kDa protein 12A | Hspa12a | 307997 | 1,59 | down |
| 5701090 | 7077365 | 1073910 | heat shock protein 4         | Hspa4   | 266759 | 1,05 | up   |
| 5734587 | 7077365 | 1073916 | heat shock protein 4         | Hspa4   | 266759 | 1,06 | up   |
| 5748383 | 7077365 | 1073909 | heat shock protein 4         | Hspa4   | 266759 | 1,12 | up   |
| 5866018 | 7077365 | 1073903 | heat shock protein 4         | Hspa4   | 266759 | 1,13 | down |
| 5899922 | 7077365 | 1073896 | heat shock protein 4         | Hspa4   | 266759 | 3,00 | down |
| 6000798 | 7077365 | 1073901 | heat shock protein 4         | Hspa4   | 266759 | 1,46 | down |
| 6005780 | 7077365 | 1073904 | heat shock protein 4         | Hspa4   | 266759 | 1,01 | down |
| 6042286 | 7077365 | 1073905 | heat shock protein 4         | Hspa4   | 266759 | 1,22 | up   |
| 6088683 | 7077365 | 1073896 | heat shock protein 4         | Hspa4   | 266759 | 1,33 | down |
| 6132482 | 7077365 | 1073902 | heat shock protein 4         | Hspa4   | 266759 | 1,02 | down |
| 6151473 | 7077365 | 1073912 | heat shock protein 4         | Hspa4   | 266759 | 1,10 | up   |
| 6220688 | 7077365 | 1073913 | heat shock protein 4         | Hspa4   | 266759 | 1,09 | down |
| 6228651 | 7077365 | 1073897 | heat shock protein 4         | Hspa4   | 266759 | 1,22 | down |
| 6320125 | 7077365 | 1073900 | heat shock protein 4         | Hspa4   | 266759 | 1,08 | down |
| 6336261 | 7077365 | 1073914 | heat shock protein 4         | Hspa4   | 266759 | 1,14 | up   |
| 6338892 | 7077365 | 1073899 | heat shock protein 4         | Hspa4   | 266759 | 1,24 | down |
| 6360756 | 7077365 | 1073915 | heat shock protein 4         | Hspa4   | 266759 | 1,00 | down |
| 6375026 | 7077365 | 1073898 | heat shock protein 4         | Hspa4   | 266759 | 1,66 | down |
| 6505693 | 7077365 | 1073906 | heat shock protein 4         | Hspa4   | 266759 | 1,22 | down |
| 6581957 | 7077365 | 1073907 | heat shock protein 4         | Hspa4   | 266759 | 1,11 | up   |
| 6606198 | 7077365 | 1073908 | heat shock protein 4         | Hspa4   | 266759 | 1,12 | down |
| 6678677 | 7077365 | 1073911 | heat shock protein 4         | Hspa4   | 266759 | 1,14 | up   |
| 6684178 | 7077365 | 1073916 | heat shock protein 4         | Hspa4   | 266759 | 1,40 | up   |

|         |         |         |                                                                 |        |        |      |      |
|---------|---------|---------|-----------------------------------------------------------------|--------|--------|------|------|
| 6695983 | 7077365 | 1073896 | heat shock protein 4                                            | Hspa4  | 266759 | 1,15 | down |
| 5756272 | 7292810 | 1603253 | heat shock protein 8                                            | Hspa8  | 24468  | 1,20 | up   |
| 5894809 | 7292810 | 1603253 | heat shock protein 8                                            | Hspa8  | 24468  | 1,01 | down |
| 5965213 | 7292810 | 1603252 | heat shock protein 8                                            | Hspa8  | 24468  | 2,76 | down |
| 6013467 | 7292810 | 1603253 | heat shock protein 8                                            | Hspa8  | 24468  | 1,11 | down |
| 6087105 | 7098824 | 1124803 | heat shock protein 8                                            | Hspb8  | 113906 | 1,60 | up   |
| 6116423 | 7098824 | 1124803 | heat shock protein 8                                            | Hspb8  | 113906 | 2,67 | down |
| 6185187 | 7098824 | 1124806 | heat shock protein 8                                            | Hspb8  | 113906 | 1,00 | up   |
| 6414277 | 7098824 | 1124805 | heat shock protein 8                                            | Hspb8  | 113906 | 1,93 | up   |
| 6498043 | 7098824 | 1124804 | heat shock protein 8                                            | Hspb8  | 113906 | 1,19 | up   |
| 6597795 | 7292810 | 1603253 | heat shock protein 8                                            | Hspa8  | 24468  | 1,05 | down |
| 6652185 | 7098824 | 1124803 | heat shock protein 8                                            | Hspb8  | 113906 | 2,69 | down |
| 6679708 | 7292810 | 1603253 | heat shock protein 8                                            | Hspa8  | 24468  | 1,30 | up   |
| 5755349 | 7041584 | 989442  | HECT domain containing 2                                        | Hectd2 | 309514 | 1,26 | down |
| 5778939 | 7041584 | 989446  | HECT domain containing 2                                        | Hectd2 | 309514 | 1,23 | up   |
| 6033878 | 7041584 | 989447  | HECT domain containing 2                                        | Hectd2 | 309514 | 1,52 | down |
| 6189064 | 7041584 | 989449  | HECT domain containing 2                                        | Hectd2 | 309514 | 1,21 | up   |
| 6283400 | 7041584 | 989446  | HECT domain containing 2                                        | Hectd2 | 309514 | 1,16 | down |
| 6405599 | 7041584 | 989450  | HECT domain containing 2                                        | Hectd2 | 309514 | 1,22 | down |
| 6407290 | 7041584 | 989448  | HECT domain containing 2                                        | Hectd2 | 309514 | 1,60 | down |
| 6602450 | 7041584 | 989443  | HECT domain containing 2                                        | Hectd2 | 309514 | 1,55 | up   |
| 6739195 | 7041584 | 989451  | HECT domain containing 2                                        | Hectd2 | 309514 | 2,18 | up   |
| 5649185 | 7362184 | 1774843 | HECT, C2 and WW domain containing E3 ubiquitin protein ligase 2 | Hecw2  | 316395 | 1,86 | down |
| 5689696 | 7362184 | 1774809 | HECT, C2 and WW domain containing E3 ubiquitin protein ligase 2 | Hecw2  | 316395 | 1,03 | up   |
| 5723592 | 7362184 | 1774810 | HECT, C2 and WW domain containing E3 ubiquitin protein ligase 2 | Hecw2  | 316395 | 1,13 | down |
| 5769114 | 7362184 | 1774770 | HECT, C2 and WW domain containing E3 ubiquitin protein ligase 2 | Hecw2  | 316395 | 1,03 | up   |
| 5793011 | 7362184 | 1774810 | HECT, C2 and WW domain containing E3 ubiquitin protein ligase 2 | Hecw2  | 316395 | 1,42 | up   |
| 5926404 | 7362184 | 1774784 | HECT, C2 and WW domain containing E3 ubiquitin protein ligase 2 | Hecw2  | 316395 | 1,04 | down |
| 5935981 | 7362184 | 1774805 | HECT, C2 and WW domain containing E3 ubiquitin protein ligase 2 | Hecw2  | 316395 | 1,00 | up   |
| 6009852 | 7362184 | 1774781 | HECT, C2 and WW domain containing E3 ubiquitin protein ligase 2 | Hecw2  | 316395 | 1,08 | up   |
| 6032860 | 7362184 | 1774786 | HECT, C2 and WW domain containing E3 ubiquitin protein ligase 2 | Hecw2  | 316395 | 1,08 | down |
| 6046850 | 7362184 | 1774770 | HECT, C2 and WW domain containing E3 ubiquitin protein ligase 2 | Hecw2  | 316395 | 1,28 | up   |
| 6050159 | 7362184 | 1774774 | HECT, C2 and WW domain containing E3 ubiquitin protein ligase 2 | Hecw2  | 316395 | 1,12 | up   |
| 6055983 | 7362184 | 1774773 | HECT, C2 and WW domain containing E3 ubiquitin protein ligase 2 | Hecw2  | 316395 | 1,00 | up   |
| 6085913 | 7362184 | 1774808 | HECT, C2 and WW domain containing E3 ubiquitin protein ligase 2 | Hecw2  | 316395 | 1,02 | down |
| 6124354 | 7362184 | 1774806 | HECT, C2 and WW domain containing E3 ubiquitin protein ligase 2 | Hecw2  | 316395 | 1,09 | up   |
| 6245895 | 7362184 | 1774813 | HECT, C2 and WW domain containing E3 ubiquitin protein ligase 2 | Hecw2  | 316395 | 1,09 | up   |
| 6250875 | 7362184 | 1774815 | HECT, C2 and WW domain containing E3 ubiquitin protein ligase 2 | Hecw2  | 316395 | 1,40 | down |
| 6271502 | 7362184 | 1774791 | HECT, C2 and WW domain containing E3 ubiquitin protein ligase 2 | Hecw2  | 316395 | 1,73 | up   |
| 6311586 | 7362184 | 1774817 | HECT, C2 and WW domain containing E3 ubiquitin protein ligase 2 | Hecw2  | 316395 | 1,22 | down |
| 6347986 | 7362184 | 1774778 | HECT, C2 and WW domain containing E3 ubiquitin protein ligase 2 | Hecw2  | 316395 | 1,03 | up   |
| 6360060 | 7362184 | 1774811 | HECT, C2 and WW domain containing E3 ubiquitin protein ligase 2 | Hecw2  | 316395 | 1,12 | up   |
| 6366639 | 7362184 | 1774812 | HECT, C2 and WW domain containing E3 ubiquitin protein ligase 2 | Hecw2  | 316395 | 1,15 | down |
| 6382846 | 7362184 | 1774787 | HECT, C2 and WW domain containing E3 ubiquitin protein ligase 2 | Hecw2  | 316395 | 1,46 | up   |
| 6410728 | 7362184 | 1774815 | HECT, C2 and WW domain containing E3 ubiquitin protein ligase 2 | Hecw2  | 316395 | 1,30 | up   |
| 6423162 | 7362184 | 1774789 | HECT, C2 and WW domain containing E3 ubiquitin protein ligase 2 | Hecw2  | 316395 | 1,83 | down |
| 6432315 | 7362184 | 1774780 | HECT, C2 and WW domain containing E3 ubiquitin protein ligase 2 | Hecw2  | 316395 | 1,01 | up   |
| 6488858 | 7362184 | 1774843 | HECT, C2 and WW domain containing E3 ubiquitin protein ligase 2 | Hecw2  | 316395 | 1,04 | down |
| 6544683 | 7362184 | 1774786 | HECT, C2 and WW domain containing E3 ubiquitin protein ligase 2 | Hecw2  | 316395 | 1,28 | up   |
| 6566851 | 7362184 | 1774790 | HECT, C2 and WW domain containing E3 ubiquitin protein ligase 2 | Hecw2  | 316395 | 2,13 | up   |
| 6621085 | 7362184 | 1774811 | HECT, C2 and WW domain containing E3 ubiquitin protein ligase 2 | Hecw2  | 316395 | 1,19 | down |
| 6650681 | 7362184 | 1774799 | HECT, C2 and WW domain containing E3 ubiquitin protein ligase 2 | Hecw2  | 316395 | 1,04 | down |
| 6673738 | 7362184 | 1774825 | HECT, C2 and WW domain containing E3 ubiquitin protein ligase 2 | Hecw2  | 316395 | 1,07 | down |
| 6699470 | 7362184 | 1774804 | HECT, C2 and WW domain containing E3 ubiquitin protein ligase 2 | Hecw2  | 316395 | 1,16 | down |
| 6709353 | 7362184 | 1774783 | HECT, C2 and WW domain containing E3 ubiquitin protein ligase 2 | Hecw2  | 316395 | 1,51 | down |
| 6711989 | 7362184 | 1774822 | HECT, C2 and WW domain containing E3 ubiquitin protein ligase 2 | Hecw2  | 316395 | 1,15 | up   |

|         |         |         |                                                                 |       |        |      |      |
|---------|---------|---------|-----------------------------------------------------------------|-------|--------|------|------|
| 6718491 | 7362184 | 1774776 | HECT, C2 and WW domain containing E3 ubiquitin protein ligase 2 | Hecw2 | 316395 | 1,36 | down |
| 6745297 | 7362184 | 1774777 | HECT, C2 and WW domain containing E3 ubiquitin protein ligase 2 | Hecw2 | 316395 | 1,46 | up   |
| 5628586 | 7192320 | 1356022 | helicase-like transcription factor                              | Hltf  | 295568 | 1,06 | up   |
| 5639153 | 7192320 | 1356023 | helicase-like transcription factor                              | Hltf  | 295568 | 1,22 | up   |
| 5660678 | 7192320 | 1356050 | helicase-like transcription factor                              | Hltf  | 295568 | 1,62 | down |
| 5740037 | 7192320 | 1356033 | helicase-like transcription factor                              | Hltf  | 295568 | 1,43 | up   |
| 5772841 | 7192320 | 1356045 | helicase-like transcription factor                              | Hltf  | 295568 | 1,38 | down |
| 5847353 | 7192320 | 1356039 | helicase-like transcription factor                              | Hltf  | 295568 | 1,06 | up   |
| 5906584 | 7192320 | 1356025 | helicase-like transcription factor                              | Hltf  | 295568 | 1,14 | up   |
| 5925166 | 7192320 | 1356020 | helicase-like transcription factor                              | Hltf  | 295568 | 1,08 | down |
| 6073685 | 7192320 | 1356040 | helicase-like transcription factor                              | Hltf  | 295568 | 2,12 | up   |
| 6163071 | 7192320 | 1356047 | helicase-like transcription factor                              | Hltf  | 295568 | 1,11 | up   |
| 6195079 | 7192320 | 1356038 | helicase-like transcription factor                              | Hltf  | 295568 | 1,14 | down |
| 6315509 | 7192320 | 1356050 | helicase-like transcription factor                              | Hltf  | 295568 | 1,02 | up   |
| 6315765 | 7192320 | 1356020 | helicase-like transcription factor                              | Hltf  | 295568 | 1,53 | up   |
| 6317016 | 7192320 | 1356037 | helicase-like transcription factor                              | Hltf  | 295568 | 1,27 | up   |
| 6401188 | 7192320 | 1356031 | helicase-like transcription factor                              | Hltf  | 295568 | 1,09 | up   |
| 6420518 | 7192320 | 1356024 | helicase-like transcription factor                              | Hltf  | 295568 | 1,17 | up   |
| 6444691 | 7192320 | 1356029 | helicase-like transcription factor                              | Hltf  | 295568 | 1,54 | up   |
| 6467377 | 7192320 | 1356030 | helicase-like transcription factor                              | Hltf  | 295568 | 1,11 | down |
| 6522732 | 7192320 | 1356048 | helicase-like transcription factor                              | Hltf  | 295568 | 1,09 | down |
| 6533746 | 7192320 | 1356034 | helicase-like transcription factor                              | Hltf  | 295568 | 1,49 | up   |
| 6569679 | 7192320 | 1356044 | helicase-like transcription factor                              | Hltf  | 295568 | 1,19 | up   |
| 6609723 | 7192320 | 1356027 | helicase-like transcription factor                              | Hltf  | 295568 | 1,14 | up   |
| 6610139 | 7192320 | 1356046 | helicase-like transcription factor                              | Hltf  | 295568 | 1,11 | up   |
| 6645138 | 7192320 | 1356041 | helicase-like transcription factor                              | Hltf  | 295568 | 1,31 | up   |
| 6745597 | 7192320 | 1356026 | helicase-like transcription factor                              | Hltf  | 295568 | 1,33 | down |
| 6746901 | 7192320 | 1356043 | helicase-like transcription factor                              | Hltf  | 295568 | 1,12 | up   |
| 5661491 | 7112225 | 1157627 | hemicentin 1                                                    | Hmcn1 | 289094 | 1,11 | up   |
| 5704454 | 7112225 | 1157655 | hemicentin 1                                                    | Hmcn1 | 289094 | 1,19 | down |
| 5706700 | 7112225 | 1157681 | hemicentin 1                                                    | Hmcn1 | 289094 | 1,21 | down |
| 5832590 | 7112225 | 1157649 | hemicentin 1                                                    | Hmcn1 | 289094 | 1,19 | down |
| 5841986 | 7112225 | 1157525 | hemicentin 1                                                    | Hmcn1 | 289094 | 1,16 | up   |
| 5904403 | 7112225 | 1157682 | hemicentin 1                                                    | Hmcn1 | 289094 | 1,09 | down |
| 5971719 | 7112225 | 1157625 | hemicentin 1                                                    | Hmcn1 | 289094 | 1,19 | up   |
| 5971941 | 7112225 | 1157633 | hemicentin 1                                                    | Hmcn1 | 289094 | 1,12 | up   |
| 6014390 | 7112225 | 1157661 | hemicentin 1                                                    | Hmcn1 | 289094 | 1,46 | up   |
| 6026116 | 7112225 | 1157630 | hemicentin 1                                                    | Hmcn1 | 289094 | 1,05 | down |
| 6037151 | 7112225 | 1157660 | hemicentin 1                                                    | Hmcn1 | 289094 | 1,45 | down |
| 6086643 | 7112225 | 1157640 | hemicentin 1                                                    | Hmcn1 | 289094 | 1,07 | up   |
| 6170485 | 7112225 | 1157626 | hemicentin 1                                                    | Hmcn1 | 289094 | 1,29 | down |
| 6192097 | 7112225 | 1157664 | hemicentin 1                                                    | Hmcn1 | 289094 | 1,12 | down |
| 6208328 | 7112225 | 1157642 | hemicentin 1                                                    | Hmcn1 | 289094 | 1,00 | up   |
| 6218733 | 7112225 | 1157650 | hemicentin 1                                                    | Hmcn1 | 289094 | 1,08 | up   |
| 6223952 | 7112225 | 1157652 | hemicentin 1                                                    | Hmcn1 | 289094 | 1,00 | down |
| 6302613 | 7112225 | 1157651 | hemicentin 1                                                    | Hmcn1 | 289094 | 1,07 | down |
| 6319650 | 7112225 | 1157624 | hemicentin 1                                                    | Hmcn1 | 289094 | 1,05 | up   |
| 6359649 | 7112225 | 1157637 | hemicentin 1                                                    | Hmcn1 | 289094 | 1,02 | up   |
| 6387379 | 7112225 | 1157641 | hemicentin 1                                                    | Hmcn1 | 289094 | 1,07 | up   |
| 6463232 | 7112225 | 1157628 | hemicentin 1                                                    | Hmcn1 | 289094 | 1,41 | down |
| 6466208 | 7112225 | 1157681 | hemicentin 1                                                    | Hmcn1 | 289094 | 1,77 | down |
| 6478179 | 7112225 | 1157638 | hemicentin 1                                                    | Hmcn1 | 289094 | 1,00 | down |
| 6502541 | 7112225 | 1157654 | hemicentin 1                                                    | Hmcn1 | 289094 | 1,05 | down |
| 6520889 | 7112225 | 1157642 | hemicentin 1                                                    | Hmcn1 | 289094 | 1,04 | down |
| 6659821 | 7112225 | 1157653 | hemicentin 1                                                    | Hmcn1 | 289094 | 1,71 | down |
| 6738447 | 7112225 | 1157635 | hemicentin 1                                                    | Hmcn1 | 289094 | 1,13 | up   |

|         |         |         |                                             |          |        |      |      |
|---------|---------|---------|---------------------------------------------|----------|--------|------|------|
| 5657947 | 7055435 | 1021544 | hemopexin                                   | Hpx      | 58917  | 1,56 | up   |
| 5681682 | 7055435 | 1021540 | hemopexin                                   | Hpx      | 58917  | 1,49 | up   |
| 5697460 | 7055435 | 1021539 | hemopexin                                   | Hpx      | 58917  | 1,19 | down |
| 5730377 | 7055435 | 1021546 | hemopexin                                   | Hpx      | 58917  | 1,22 | down |
| 5845298 | 7055435 | 1021542 | hemopexin                                   | Hpx      | 58917  | 1,72 | up   |
| 5983191 | 7055435 | 1021547 | hemopexin                                   | Hpx      | 58917  | 1,59 | up   |
| 5985209 | 7055435 | 1021541 | hemopexin                                   | Hpx      | 58917  | 1,52 | down |
| 6556499 | 7055435 | 1021543 | hemopexin                                   | Hpx      | 58917  | 1,03 | up   |
| 6616743 | 7055435 | 1021545 | hemopexin                                   | Hpx      | 58917  | 1,26 | up   |
| 6650953 | 7055435 | 1021538 | hemopexin                                   | Hpx      | 58917  | 3,21 | down |
| 6688470 | 7055435 | 1021548 | hemopexin                                   | Hpx      | 58917  | 5,72 | down |
| 5645122 | 7261768 | 1527171 | HEPACAM family member 2                     | Hepacam2 | 296846 | 1,16 | down |
| 5664595 | 7261768 | 1527166 | HEPACAM family member 2                     | Hepacam2 | 296846 | 1,12 | down |
| 5709592 | 7261768 | 1527176 | HEPACAM family member 2                     | Hepacam2 | 296846 | 1,13 | down |
| 5713492 | 7261768 | 1527175 | HEPACAM family member 2                     | Hepacam2 | 296846 | 1,05 | down |
| 6025142 | 7261768 | 1527174 | HEPACAM family member 2                     | Hepacam2 | 296846 | 1,10 | down |
| 6164554 | 7261768 | 1527170 | HEPACAM family member 2                     | Hepacam2 | 296846 | 1,25 | down |
| 6381873 | 7261768 | 1527180 | HEPACAM family member 2                     | Hepacam2 | 296846 | 1,57 | down |
| 6416887 | 7261768 | 1527169 | HEPACAM family member 2                     | Hepacam2 | 296846 | 1,20 | up   |
| 6659695 | 7261768 | 1527167 | HEPACAM family member 2                     | Hepacam2 | 296846 | 1,11 | down |
| 5640496 | 7127197 | 1194564 | hepatocyte growth factor activator          | Hgfac    | 58947  | 1,51 | up   |
| 5731360 | 7127197 | 1194558 | hepatocyte growth factor activator          | Hgfac    | 58947  | 1,22 | down |
| 5755213 | 7127197 | 1194563 | hepatocyte growth factor activator          | Hgfac    | 58947  | 2,34 | up   |
| 5777853 | 7127197 | 1194551 | hepatocyte growth factor activator          | Hgfac    | 58947  | 1,06 | down |
| 5786776 | 7127197 | 1194565 | hepatocyte growth factor activator          | Hgfac    | 58947  | 1,11 | up   |
| 5819435 | 7127197 | 1194565 | hepatocyte growth factor activator          | Hgfac    | 58947  | 1,13 | down |
| 5868629 | 7127197 | 1194553 | hepatocyte growth factor activator          | Hgfac    | 58947  | 1,45 | up   |
| 6079562 | 7127197 | 1194555 | hepatocyte growth factor activator          | Hgfac    | 58947  | 1,43 | down |
| 6219741 | 7127197 | 1194559 | hepatocyte growth factor activator          | Hgfac    | 58947  | 1,03 | up   |
| 6225476 | 7127197 | 1194560 | hepatocyte growth factor activator          | Hgfac    | 58947  | 1,70 | up   |
| 6272703 | 7127197 | 1194554 | hepatocyte growth factor activator          | Hgfac    | 58947  | 1,03 | up   |
| 6413084 | 7127197 | 1194557 | hepatocyte growth factor activator          | Hgfac    | 58947  | 1,72 | down |
| 6527008 | 7127197 | 1194556 | hepatocyte growth factor activator          | Hgfac    | 58947  | 1,18 | up   |
| 6552435 | 7127197 | 1194561 | hepatocyte growth factor activator          | Hgfac    | 58947  | 1,00 | down |
| 6702158 | 7127197 | 1194562 | hepatocyte growth factor activator          | Hgfac    | 58947  | 1,23 | up   |
| 6727782 | 7127197 | 1194552 | hepatocyte growth factor activator          | Hgfac    | 58947  | 1,04 | up   |
| 5670775 | 7042049 | 990659  | Hermansky-Pudlak syndrome 1 homolog (human) | Hps1     | 114638 | 1,15 | up   |
| 5762630 | 7042049 | 990654  | Hermansky-Pudlak syndrome 1 homolog (human) | Hps1     | 114638 | 1,04 | down |
| 5776862 | 7042049 | 990663  | Hermansky-Pudlak syndrome 1 homolog (human) | Hps1     | 114638 | 1,07 | down |
| 5815237 | 7042049 | 990656  | Hermansky-Pudlak syndrome 1 homolog (human) | Hps1     | 114638 | 1,20 | down |
| 5874970 | 7042049 | 990662  | Hermansky-Pudlak syndrome 1 homolog (human) | Hps1     | 114638 | 2,39 | down |
| 5949266 | 7042049 | 990668  | Hermansky-Pudlak syndrome 1 homolog (human) | Hps1     | 114638 | 1,68 | down |
| 6086927 | 7042049 | 990670  | Hermansky-Pudlak syndrome 1 homolog (human) | Hps1     | 114638 | 1,54 | up   |
| 6095627 | 7042049 | 990666  | Hermansky-Pudlak syndrome 1 homolog (human) | Hps1     | 114638 | 1,06 | up   |
| 6120208 | 7042049 | 990653  | Hermansky-Pudlak syndrome 1 homolog (human) | Hps1     | 114638 | 1,17 | down |
| 6250085 | 7042049 | 990672  | Hermansky-Pudlak syndrome 1 homolog (human) | Hps1     | 114638 | 1,09 | up   |
| 6277088 | 7042049 | 990660  | Hermansky-Pudlak syndrome 1 homolog (human) | Hps1     | 114638 | 1,14 | down |
| 6366417 | 7042049 | 990667  | Hermansky-Pudlak syndrome 1 homolog (human) | Hps1     | 114638 | 1,06 | down |
| 6382371 | 7042049 | 990665  | Hermansky-Pudlak syndrome 1 homolog (human) | Hps1     | 114638 | 1,16 | down |
| 6438511 | 7042049 | 990655  | Hermansky-Pudlak syndrome 1 homolog (human) | Hps1     | 114638 | 1,11 | down |
| 6444817 | 7042049 | 990669  | Hermansky-Pudlak syndrome 1 homolog (human) | Hps1     | 114638 | 1,05 | down |
| 6543259 | 7042049 | 990671  | Hermansky-Pudlak syndrome 1 homolog (human) | Hps1     | 114638 | 1,07 | up   |
| 6577533 | 7042049 | 990661  | Hermansky-Pudlak syndrome 1 homolog (human) | Hps1     | 114638 | 1,10 | up   |
| 6596885 | 7042049 | 990664  | Hermansky-Pudlak syndrome 1 homolog (human) | Hps1     | 114638 | 1,00 | down |
| 6676101 | 7042049 | 990657  | Hermansky-Pudlak syndrome 1 homolog (human) | Hps1     | 114638 | 1,05 | down |
| 6691267 | 7042049 | 990667  | Hermansky-Pudlak syndrome 1 homolog (human) | Hps1     | 114638 | 1,12 | down |

|         |         |         |                                                   |         |        |      |      |
|---------|---------|---------|---------------------------------------------------|---------|--------|------|------|
| 6700848 | 7042049 | 990658  | Hermansky-Pudlak syndrome 1 homolog (human)       | Hps1    | 114638 | 1,15 | down |
| 5787171 | 7206804 | 1391337 | Hermansky-Pudlak syndrome 3 homolog (human)       | Hps3    | 310288 | 1,10 | up   |
| 5872682 | 7206804 | 1391343 | Hermansky-Pudlak syndrome 3 homolog (human)       | Hps3    | 310288 | 2,62 | down |
| 6008701 | 7206804 | 1391338 | Hermansky-Pudlak syndrome 3 homolog (human)       | Hps3    | 310288 | 1,08 | up   |
| 6096707 | 7206804 | 1391339 | Hermansky-Pudlak syndrome 3 homolog (human)       | Hps3    | 310288 | 1,12 | up   |
| 6341948 | 7206804 | 1391346 | Hermansky-Pudlak syndrome 3 homolog (human)       | Hps3    | 310288 | 1,15 | down |
| 6381968 | 7206804 | 1391345 | Hermansky-Pudlak syndrome 3 homolog (human)       | Hps3    | 310288 | 1,24 | up   |
| 6529008 | 7206804 | 1391345 | Hermansky-Pudlak syndrome 3 homolog (human)       | Hps3    | 310288 | 1,08 | down |
| 6568867 | 7206804 | 1391341 | Hermansky-Pudlak syndrome 3 homolog (human)       | Hps3    | 310288 | 1,10 | up   |
| 5644648 | 7321167 | 1675102 | heterogeneous nuclear ribonucleoprotein A1        | Hnrnpa1 | 29578  | 1,19 | down |
| 5662048 | 7321167 | 1675104 | heterogeneous nuclear ribonucleoprotein A1        | Hnrnpa1 | 29578  | 2,09 | up   |
| 5786894 | 7321167 | 1675100 | heterogeneous nuclear ribonucleoprotein A1        | Hnrnpa1 | 29578  | 1,11 | down |
| 5837228 | 7321167 | 1675100 | heterogeneous nuclear ribonucleoprotein A1        | Hnrnpa1 | 29578  | 1,11 | down |
| 5939562 | 7321167 | 1675099 | heterogeneous nuclear ribonucleoprotein A1        | Hnrnpa1 | 29578  | 1,03 | up   |
| 6016291 | 7321167 | 1675094 | heterogeneous nuclear ribonucleoprotein A1        | Hnrnpa1 | 29578  | 1,32 | down |
| 6124202 | 7321167 | 1675103 | heterogeneous nuclear ribonucleoprotein A1        | Hnrnpa1 | 29578  | 1,12 | up   |
| 6464023 | 7321167 | 1675102 | heterogeneous nuclear ribonucleoprotein A1        | Hnrnpa1 | 29578  | 1,11 | down |
| 6528444 | 7321167 | 1675095 | heterogeneous nuclear ribonucleoprotein A1        | Hnrnpa1 | 29578  | 1,49 | down |
| 6548706 | 7321167 | 1675101 | heterogeneous nuclear ribonucleoprotein A1        | Hnrnpa1 | 29578  | 1,21 | down |
| 6558526 | 7321167 | 1675098 | heterogeneous nuclear ribonucleoprotein A1        | Hnrnpa1 | 29578  | 1,12 | up   |
| 6599813 | 7321167 | 1675096 | heterogeneous nuclear ribonucleoprotein A1        | Hnrnpa1 | 29578  | 1,05 | up   |
| 6719366 | 7321167 | 1675097 | heterogeneous nuclear ribonucleoprotein A1        | Hnrnpa1 | 29578  | 1,26 | up   |
| 5842444 | 7045663 | 1000082 | heterogeneous nuclear ribonucleoprotein A3        | Hnrnpa3 | 362152 | 2,24 | up   |
| 6007917 | 7045663 | 1000082 | heterogeneous nuclear ribonucleoprotein A3        | Hnrnpa3 | 362152 | 1,04 | up   |
| 6251898 | 7045663 | 1000081 | heterogeneous nuclear ribonucleoprotein A3        | Hnrnpa3 | 362152 | 1,26 | down |
| 5745335 | 7137646 | 1220435 | heterogeneous nuclear ribonucleoprotein C (C1/C2) | Hnrnpc  | 290046 | 1,87 | up   |
| 5760138 | 7137646 | 1220439 | heterogeneous nuclear ribonucleoprotein C (C1/C2) | Hnrnpc  | 290046 | 1,10 | up   |
| 5781270 | 7137646 | 1220430 | heterogeneous nuclear ribonucleoprotein C (C1/C2) | Hnrnpc  | 290046 | 1,08 | down |
| 5871886 | 7137646 | 1220434 | heterogeneous nuclear ribonucleoprotein C (C1/C2) | Hnrnpc  | 290046 | 1,19 | up   |
| 5976900 | 7137646 | 1220430 | heterogeneous nuclear ribonucleoprotein C (C1/C2) | Hnrnpc  | 290046 | 1,13 | up   |
| 6196407 | 7137646 | 1220430 | heterogeneous nuclear ribonucleoprotein C (C1/C2) | Hnrnpc  | 290046 | 1,31 | up   |
| 6379835 | 7137646 | 1220436 | heterogeneous nuclear ribonucleoprotein C (C1/C2) | Hnrnpc  | 290046 | 1,03 | up   |
| 6420921 | 7137646 | 1220432 | heterogeneous nuclear ribonucleoprotein C (C1/C2) | Hnrnpc  | 290046 | 1,02 | up   |
| 6626119 | 7137646 | 1220433 | heterogeneous nuclear ribonucleoprotein C (C1/C2) | Hnrnpc  | 290046 | 1,14 | up   |
| 5635161 | 7280644 | 1574261 | heterogeneous nuclear ribonucleoprotein R         | Hnrnpr  | 319110 | 1,02 | down |
| 5704134 | 7280644 | 1574262 | heterogeneous nuclear ribonucleoprotein R         | Hnrnpr  | 319110 | 1,24 | down |
| 5727889 | 7280644 | 1574267 | heterogeneous nuclear ribonucleoprotein R         | Hnrnpr  | 319110 | 1,02 | up   |
| 5810176 | 7280644 | 1574265 | heterogeneous nuclear ribonucleoprotein R         | Hnrnpr  | 319110 | 1,01 | down |
| 5900867 | 7280644 | 1574267 | heterogeneous nuclear ribonucleoprotein R         | Hnrnpr  | 319110 | 1,09 | up   |
| 6129746 | 7280644 | 1574262 | heterogeneous nuclear ribonucleoprotein R         | Hnrnpr  | 319110 | 1,12 | up   |
| 6143534 | 7280644 | 1574260 | heterogeneous nuclear ribonucleoprotein R         | Hnrnpr  | 319110 | 1,03 | down |
| 6473666 | 7280644 | 1574267 | heterogeneous nuclear ribonucleoprotein R         | Hnrnpr  | 319110 | 1,00 | up   |
| 6511156 | 7280644 | 1574263 | heterogeneous nuclear ribonucleoprotein R         | Hnrnpr  | 319110 | 1,15 | up   |
| 6578010 | 7280644 | 1574266 | heterogeneous nuclear ribonucleoprotein R         | Hnrnpr  | 319110 | 3,12 | down |
| 6666667 | 7280644 | 1574264 | heterogeneous nuclear ribonucleoprotein R         | Hnrnpr  | 319110 | 1,09 | up   |
| 6677401 | 7280644 | 1574266 | heterogeneous nuclear ribonucleoprotein R         | Hnrnpr  | 319110 | 1,15 | up   |
| 6686704 | 7280644 | 1574259 | heterogeneous nuclear ribonucleoprotein R         | Hnrnpr  | 319110 | 1,28 | down |
| 5666920 | 7266497 | 1538171 | hexokinase 2                                      | Hk2     | 25059  | 1,57 | down |
| 5752287 | 7266497 | 1538169 | hexokinase 2                                      | Hk2     | 25059  | 1,42 | down |
| 5783012 | 7266497 | 1538174 | hexokinase 2                                      | Hk2     | 25059  | 1,11 | up   |
| 5839690 | 7266497 | 1538177 | hexokinase 2                                      | Hk2     | 25059  | 1,17 | down |
| 5847171 | 7266497 | 1538172 | hexokinase 2                                      | Hk2     | 25059  | 1,14 | up   |
| 5870610 | 7266497 | 1538167 | hexokinase 2                                      | Hk2     | 25059  | 1,04 | up   |
| 5902148 | 7266497 | 1538163 | hexokinase 2                                      | Hk2     | 25059  | 2,13 | up   |
| 5911383 | 7266497 | 1538173 | hexokinase 2                                      | Hk2     | 25059  | 1,19 | up   |
| 5911587 | 7266497 | 1538176 | hexokinase 2                                      | Hk2     | 25059  | 1,19 | down |

|         |         |         |                                                                            |           |           |      |      |
|---------|---------|---------|----------------------------------------------------------------------------|-----------|-----------|------|------|
| 5948047 | 7266497 | 1538161 | hexokinase 2                                                               | Hk2       | 25059     | 3,80 | up   |
| 5959948 | 7266497 | 1538170 | hexokinase 2                                                               | Hk2       | 25059     | 1,15 | down |
| 5973422 | 7266497 | 1538175 | hexokinase 2                                                               | Hk2       | 25059     | 1,02 | up   |
| 5976515 | 7266497 | 1538162 | hexokinase 2                                                               | Hk2       | 25059     | 1,12 | down |
| 6036304 | 7266497 | 1538165 | hexokinase 2                                                               | Hk2       | 25059     | 1,10 | down |
| 6066179 | 7266497 | 1538166 | hexokinase 2                                                               | Hk2       | 25059     | 1,38 | up   |
| 6215765 | 7266497 | 1538168 | hexokinase 2                                                               | Hk2       | 25059     | 1,30 | down |
| 6300173 | 7266497 | 1538164 | hexokinase 2                                                               | Hk2       | 25059     | 1,09 | up   |
| 6378345 | 7266497 | 1538179 | hexokinase 2                                                               | Hk2       | 25059     | 1,42 | down |
| 6570940 | 7266497 | 1538178 | hexokinase 2                                                               | Hk2       | 25059     | 1,81 | up   |
| 5636277 | 7074132 | 1066324 | hexosaminidase (glycosyl hydrolase family 20, catalytic domain) containing | rCG_34541 | 100216475 | 1,42 | up   |
| 5646635 | 7074132 | 1066313 | hexosaminidase (glycosyl hydrolase family 20, catalytic domain) containing | rCG_34541 | 100216475 | 1,10 | down |
| 5676224 | 7074132 | 1066322 | hexosaminidase (glycosyl hydrolase family 20, catalytic domain) containing | rCG_34541 | 100216475 | 1,04 | up   |
| 5695677 | 7074132 | 1066315 | hexosaminidase (glycosyl hydrolase family 20, catalytic domain) containing | rCG_34541 | 100216475 | 1,07 | down |
| 5745863 | 7074132 | 1066327 | hexosaminidase (glycosyl hydrolase family 20, catalytic domain) containing | rCG_34541 | 100216475 | 2,12 | down |
| 5889254 | 7074132 | 1066325 | hexosaminidase (glycosyl hydrolase family 20, catalytic domain) containing | rCG_34541 | 100216475 | 1,50 | down |
| 5975967 | 7074132 | 1066320 | hexosaminidase (glycosyl hydrolase family 20, catalytic domain) containing | rCG_34541 | 100216475 | 1,00 | up   |
| 5980584 | 7074132 | 1066324 | hexosaminidase (glycosyl hydrolase family 20, catalytic domain) containing | rCG_34541 | 100216475 | 1,14 | up   |
| 6104275 | 7074132 | 1066319 | hexosaminidase (glycosyl hydrolase family 20, catalytic domain) containing | rCG_34541 | 100216475 | 1,04 | down |
| 6116927 | 7074132 | 1066314 | hexosaminidase (glycosyl hydrolase family 20, catalytic domain) containing | rCG_34541 | 100216475 | 1,09 | down |
| 6199785 | 7074132 | 1066324 | hexosaminidase (glycosyl hydrolase family 20, catalytic domain) containing | rCG_34541 | 100216475 | 1,07 | up   |
| 6353828 | 7074132 | 1066317 | hexosaminidase (glycosyl hydrolase family 20, catalytic domain) containing | rCG_34541 | 100216475 | 1,21 | up   |
| 6364422 | 7074132 | 1066316 | hexosaminidase (glycosyl hydrolase family 20, catalytic domain) containing | rCG_34541 | 100216475 | 1,01 | down |
| 6586327 | 7074132 | 1066325 | hexosaminidase (glycosyl hydrolase family 20, catalytic domain) containing | rCG_34541 | 100216475 | 1,17 | down |
| 5794321 | 7154616 | 1262186 | hippocampus abundant transcript-like 1                                     | Hiat1l    | 306687    | 1,66 | up   |
| 5814442 | 7154616 | 1262184 | hippocampus abundant transcript-like 1                                     | Hiat1l    | 306687    | 1,04 | down |
| 5956638 | 7154616 | 1262190 | hippocampus abundant transcript-like 1                                     | Hiat1l    | 306687    | 1,12 | down |
| 5968714 | 7154616 | 1262186 | hippocampus abundant transcript-like 1                                     | Hiat1l    | 306687    | 1,55 | down |
| 6048293 | 7154616 | 1262199 | hippocampus abundant transcript-like 1                                     | Hiat1l    | 306687    | 1,05 | up   |
| 6054199 | 7154616 | 1262187 | hippocampus abundant transcript-like 1                                     | Hiat1l    | 306687    | 1,06 | up   |
| 6224692 | 7154616 | 1262194 | hippocampus abundant transcript-like 1                                     | Hiat1l    | 306687    | 1,26 | down |
| 6411649 | 7154616 | 1262183 | hippocampus abundant transcript-like 1                                     | Hiat1l    | 306687    | 1,16 | down |
| 6473122 | 7154616 | 1262192 | hippocampus abundant transcript-like 1                                     | Hiat1l    | 306687    | 1,13 | up   |
| 6492770 | 7154616 | 1262189 | hippocampus abundant transcript-like 1                                     | Hiat1l    | 306687    | 1,09 | up   |
| 6523173 | 7154616 | 1262191 | hippocampus abundant transcript-like 1                                     | Hiat1l    | 306687    | 1,02 | up   |
| 6594729 | 7154616 | 1262195 | hippocampus abundant transcript-like 1                                     | Hiat1l    | 306687    | 1,40 | down |
| 6613822 | 7154616 | 1262198 | hippocampus abundant transcript-like 1                                     | Hiat1l    | 306687    | 1,11 | up   |
| 6721746 | 7154616 | 1262199 | hippocampus abundant transcript-like 1                                     | Hiat1l    | 306687    | 1,25 | down |
| 5638003 | 7285688 | 1586192 | histidine triad nucleotide binding protein 2                               | Hint2     | 313491    | 2,03 | down |
| 5682438 | 7285688 | 1586195 | histidine triad nucleotide binding protein 2                               | Hint2     | 313491    | 1,14 | up   |
| 6036912 | 7285688 | 1586193 | histidine triad nucleotide binding protein 2                               | Hint2     | 313491    | 1,24 | down |
| 6432539 | 7285688 | 1586193 | histidine triad nucleotide binding protein 2                               | Hint2     | 313491    | 1,21 | up   |
| 6443182 | 7285688 | 1586193 | histidine triad nucleotide binding protein 2                               | Hint2     | 313491    | 1,37 | down |
| 5652868 | 7169480 | 1298226 | histidyl-tRNA synthetase 2-like                                            | Hars2l    | 307491    | 1,31 | down |
| 5691072 | 7169480 | 1298228 | histidyl-tRNA synthetase 2-like                                            | Hars2l    | 307491    | 1,66 | down |
| 5776696 | 7169480 | 1298230 | histidyl-tRNA synthetase 2-like                                            | Hars2l    | 307491    | 1,17 | up   |
| 5867627 | 7169480 | 1298225 | histidyl-tRNA synthetase 2-like                                            | Hars2l    | 307491    | 1,27 | down |
| 6065718 | 7169480 | 1298227 | histidyl-tRNA synthetase 2-like                                            | Hars2l    | 307491    | 1,12 | down |
| 6664557 | 7169480 | 1298230 | histidyl-tRNA synthetase 2-like                                            | Hars2l    | 307491    | 2,07 | up   |
| 6677710 | 7169480 | 1298229 | histidyl-tRNA synthetase 2-like                                            | Hars2l    | 307491    | 1,39 | up   |
| 5656627 | 7216919 | 1415034 | histocompatibility 2, class II antigen E alpha                             | H2-Ea     | 294269    | 1,40 | up   |
| 5916222 | 7216919 | 1415032 | histocompatibility 2, class II antigen E alpha                             | H2-Ea     | 294269    | 2,48 | down |
| 5929473 | 7216919 | 1415033 | histocompatibility 2, class II antigen E alpha                             | H2-Ea     | 294269    | 1,51 | up   |
| 6206316 | 7216919 | 1415035 | histocompatibility 2, class II antigen E alpha                             | H2-Ea     | 294269    | 1,30 | up   |
| 6265065 | 7216919 | 1415036 | histocompatibility 2, class II antigen E alpha                             | H2-Ea     | 294269    | 1,21 | up   |
| 6369474 | 7216919 | 1415035 | histocompatibility 2, class II antigen E alpha                             | H2-Ea     | 294269    | 1,06 | up   |



|         |         |         |                                                                                                                 |                   |        |      |      |
|---------|---------|---------|-----------------------------------------------------------------------------------------------------------------|-------------------|--------|------|------|
| 6370498 | 7216919 | 1415034 | histocompatibility 2, class II antigen E alpha                                                                  | H2-Ea             | 294269 | 1,09 | down |
| 5653098 | 7216406 | 1413937 | histocompatibility 2, M region locus 10.6                                                                       | H2-M10.6          | 414787 | 1,42 | up   |
| 5708759 | 7216406 | 1413934 | histocompatibility 2, M region locus 10.6                                                                       | H2-M10.6          | 414787 | 1,04 | up   |
| 5714759 | 7216406 | 1413935 | histocompatibility 2, M region locus 10.6                                                                       | H2-M10.6          | 414787 | 1,47 | down |
| 5944113 | 7216406 | 1413934 | histocompatibility 2, M region locus 10.6                                                                       | H2-M10.6          | 414787 | 1,03 | down |
| 6150866 | 7216406 | 1413936 | histocompatibility 2, M region locus 10.6                                                                       | H2-M10.6          | 414787 | 2,21 | down |
| 6161527 | 7216406 | 1413936 | histocompatibility 2, M region locus 10.6                                                                       | H2-M10.6          | 414787 | 1,18 | up   |
| 6547895 | 7216406 | 1413933 | histocompatibility 2, M region locus 10.6                                                                       | H2-M10.6          | 414787 | 1,04 | down |
| 5691684 | 7220278 | 1423736 | histocompatibility 2, M region locus 3                                                                          | H2-M3             | 24747  | 1,18 | up   |
| 5727457 | 7220278 | 1423734 | histocompatibility 2, M region locus 3                                                                          | H2-M3             | 24747  | 2,04 | up   |
| 5747548 | 7220278 | 1423731 | histocompatibility 2, M region locus 3                                                                          | H2-M3             | 24747  | 1,31 | down |
| 6204352 | 7220278 | 1423733 | histocompatibility 2, M region locus 3                                                                          | H2-M3             | 24747  | 1,69 | up   |
| 6220252 | 7220278 | 1423732 | histocompatibility 2, M region locus 3                                                                          | H2-M3             | 24747  | 1,30 | down |
| 6421806 | 7220278 | 1423735 | histocompatibility 2, M region locus 3                                                                          | H2-M3             | 24747  | 1,40 | up   |
| 5629474 | 7216562 | 1414192 | histocompatibility 2, T region locus 24                                                                         | RT1-T24-1         | 361787 | 2,04 | down |
| 5824423 | 7216562 | 1414193 | histocompatibility 2, T region locus 24                                                                         | RT1-T24-1         | 361787 | 1,89 | down |
| 5903059 | 7216562 | 1414190 | histocompatibility 2, T region locus 24                                                                         | RT1-T24-1         | 361787 | 1,66 | down |
| 5971359 | 7216562 | 1414193 | histocompatibility 2, T region locus 24                                                                         | RT1-T24-1         | 361787 | 2,11 | up   |
| 6193977 | 7216562 | 1414189 | histocompatibility 2, T region locus 24                                                                         | RT1-T24-1         | 361787 | 1,45 | down |
| 6355099 | 7216540 | 1414163 | histocompatibility 2, T region locus 24                                                                         | H2-T24            | 414784 | 1,33 | down |
| 6470445 | 7216562 | 1414191 | histocompatibility 2, T region locus 24                                                                         | RT1-T24-1         | 361787 | 1,47 | down |
| 6490490 | 7216540 | 1414167 | histocompatibility 2, T region locus 24                                                                         | H2-T24            | 414784 | 1,27 | up   |
| 6495453 | 7216562 | 1414194 | histocompatibility 2, T region locus 24                                                                         | RT1-T24-1         | 361787 | 1,50 | up   |
| 6109003 | 7216540 | 1414165 | histocompatibility 2, T region locus 24 /// histocompatibility 2, T region locus 24 /// RT1-T24-1 /// LO784 /// | 361787 /// 360231 | 2,08   | down |      |
| 6584293 | 7216540 | 1414164 | histocompatibility 2, T region locus 24 /// histocompatibility 2, T region locus 24 /// RT1-T24-1 /// LO784 /// | 361787 /// 360231 | 1,15   | down |      |
| 5905166 | 7216540 | 1414166 | histocompatibility 2, T region locus 24 /// MHC class I RT1.O type 149 processed 2-T24 /// LOC360231            | 414784 /// 360231 | 2,22   | up   |      |
| 6199191 | 7216540 | 1414162 | histocompatibility 2, T region locus 24 /// MHC class I RT1.O type 149 processed 2-T24 /// LOC360231            | 414784 /// 360231 | 1,10   | down |      |
| 5666543 | 7373678 | 1805880 | histone deacetylase 6                                                                                           | Hdac6             | 84581  | 1,60 | up   |
| 5713804 | 7373678 | 1805879 | histone deacetylase 6                                                                                           | Hdac6             | 84581  | 1,13 | up   |
| 5874870 | 7373678 | 1805879 | histone deacetylase 6                                                                                           | Hdac6             | 84581  | 1,28 | down |
| 5756484 | 7331434 | 1699224 | histone deacetylase 7A                                                                                          | Hdac7a            | 84582  | 1,53 | up   |
| 5864003 | 7331434 | 1699220 | histone deacetylase 7A                                                                                          | Hdac7a            | 84582  | 1,12 | down |
| 5991043 | 7331434 | 1699226 | histone deacetylase 7A                                                                                          | Hdac7a            | 84582  | 1,19 | down |
| 6284893 | 7331434 | 1699222 | histone deacetylase 7A                                                                                          | Hdac7a            | 84582  | 1,85 | up   |
| 6387248 | 7331434 | 1699225 | histone deacetylase 7A                                                                                          | Hdac7a            | 84582  | 1,14 | down |
| 6518693 | 7331434 | 1699221 | histone deacetylase 7A                                                                                          | Hdac7a            | 84582  | 1,22 | up   |
| 6682715 | 7331434 | 1699222 | histone deacetylase 7A                                                                                          | Hdac7a            | 84582  | 1,89 | down |
| 5641822 | 7216745 | 1414565 | HLA-B associated transcript 2                                                                                   | Bat2              | 294250 | 1,10 | up   |
| 5705641 | 7216745 | 1414553 | HLA-B associated transcript 2                                                                                   | Bat2              | 294250 | 1,10 | down |
| 5708557 | 7216745 | 1414559 | HLA-B associated transcript 2                                                                                   | Bat2              | 294250 | 1,03 | up   |
| 5709157 | 7216745 | 1414546 | HLA-B associated transcript 2                                                                                   | Bat2              | 294250 | 1,22 | up   |
| 5758693 | 7216745 | 1414569 | HLA-B associated transcript 2                                                                                   | Bat2              | 294250 | 1,02 | down |
| 5796159 | 7216745 | 1414562 | HLA-B associated transcript 2                                                                                   | Bat2              | 294250 | 1,04 | up   |
| 5829830 | 7216745 | 1414548 | HLA-B associated transcript 2                                                                                   | Bat2              | 294250 | 1,13 | up   |
| 5833141 | 7216745 | 1414570 | HLA-B associated transcript 2                                                                                   | Bat2              | 294250 | 2,11 | up   |
| 5833983 | 7216745 | 1414549 | HLA-B associated transcript 2                                                                                   | Bat2              | 294250 | 1,04 | up   |
| 5835399 | 7216745 | 1414545 | HLA-B associated transcript 2                                                                                   | Bat2              | 294250 | 1,17 | up   |
| 5844152 | 7216745 | 1414552 | HLA-B associated transcript 2                                                                                   | Bat2              | 294250 | 1,07 | down |
| 5848554 | 7216745 | 1414566 | HLA-B associated transcript 2                                                                                   | Bat2              | 294250 | 1,05 | down |
| 5853987 | 7216745 | 1414544 | HLA-B associated transcript 2                                                                                   | Bat2              | 294250 | 1,05 | down |
| 5922364 | 7216745 | 1414563 | HLA-B associated transcript 2                                                                                   | Bat2              | 294250 | 1,24 | up   |
| 5962832 | 7216745 | 1414560 | HLA-B associated transcript 2                                                                                   | Bat2              | 294250 | 1,04 | down |
| 5995259 | 7216745 | 1414571 | HLA-B associated transcript 2                                                                                   | Bat2              | 294250 | 1,29 | up   |
| 6079447 | 7216745 | 1414556 | HLA-B associated transcript 2                                                                                   | Bat2              | 294250 | 1,18 | down |
| 6079563 | 7216745 | 1414570 | HLA-B associated transcript 2                                                                                   | Bat2              | 294250 | 1,05 | down |
| 6177631 | 7216745 | 1414547 | HLA-B associated transcript 2                                                                                   | Bat2              | 294250 | 1,15 | up   |

|         |         |         |                                                                               |       |        |      |      |
|---------|---------|---------|-------------------------------------------------------------------------------|-------|--------|------|------|
| 6192975 | 7216745 | 1414556 | HLA-B associated transcript 2                                                 | Bat2  | 294250 | 1,01 | up   |
| 6201960 | 7216745 | 1414555 | HLA-B associated transcript 2                                                 | Bat2  | 294250 | 1,02 | up   |
| 6277282 | 7216745 | 1414558 | HLA-B associated transcript 2                                                 | Bat2  | 294250 | 1,07 | up   |
| 6277733 | 7216745 | 1414557 | HLA-B associated transcript 2                                                 | Bat2  | 294250 | 1,05 | up   |
| 6287126 | 7216745 | 1414558 | HLA-B associated transcript 2                                                 | Bat2  | 294250 | 1,02 | up   |
| 6322284 | 7216745 | 1414564 | HLA-B associated transcript 2                                                 | Bat2  | 294250 | 2,78 | up   |
| 6351521 | 7216745 | 1414558 | HLA-B associated transcript 2                                                 | Bat2  | 294250 | 1,08 | down |
| 6377346 | 7216745 | 1414556 | HLA-B associated transcript 2                                                 | Bat2  | 294250 | 1,02 | down |
| 6418110 | 7216745 | 1414568 | HLA-B associated transcript 2                                                 | Bat2  | 294250 | 1,04 | up   |
| 6443985 | 7216745 | 1414572 | HLA-B associated transcript 2                                                 | Bat2  | 294250 | 1,05 | up   |
| 6471464 | 7216745 | 1414561 | HLA-B associated transcript 2                                                 | Bat2  | 294250 | 1,31 | down |
| 6569649 | 7216745 | 1414551 | HLA-B associated transcript 2                                                 | Bat2  | 294250 | 1,16 | up   |
| 6599720 | 7216745 | 1414558 | HLA-B associated transcript 2                                                 | Bat2  | 294250 | 1,13 | up   |
| 6610191 | 7216745 | 1414564 | HLA-B associated transcript 2                                                 | Bat2  | 294250 | 1,07 | down |
| 6622241 | 7216745 | 1414550 | HLA-B associated transcript 2                                                 | Bat2  | 294250 | 1,19 | down |
| 6643861 | 7216745 | 1414573 | HLA-B associated transcript 2                                                 | Bat2  | 294250 | 1,03 | down |
| 6664088 | 7216745 | 1414549 | HLA-B associated transcript 2                                                 | Bat2  | 294250 | 1,27 | up   |
| 6677736 | 7216745 | 1414567 | HLA-B associated transcript 2                                                 | Bat2  | 294250 | 1,16 | down |
| 6692963 | 7216745 | 1414559 | HLA-B associated transcript 2                                                 | Bat2  | 294250 | 1,05 | down |
| 6696774 | 7216745 | 1414558 | HLA-B associated transcript 2                                                 | Bat2  | 294250 | 1,17 | up   |
| 6699598 | 7216745 | 1414554 | HLA-B associated transcript 2                                                 | Bat2  | 294250 | 1,07 | up   |
| 6720699 | 7216745 | 1414558 | HLA-B associated transcript 2                                                 | Bat2  | 294250 | 1,12 | up   |
| 5677906 | 7305534 | 1636409 | HMG-box transcription factor 1                                                | Hbp1  | 27080  | 1,10 | up   |
| 5699583 | 7305534 | 1636401 | HMG-box transcription factor 1                                                | Hbp1  | 27080  | 2,22 | down |
| 5729587 | 7305534 | 1636402 | HMG-box transcription factor 1                                                | Hbp1  | 27080  | 1,24 | down |
| 5997315 | 7305534 | 1636403 | HMG-box transcription factor 1                                                | Hbp1  | 27080  | 1,52 | up   |
| 6063831 | 7305534 | 1636405 | HMG-box transcription factor 1                                                | Hbp1  | 27080  | 1,30 | up   |
| 6170084 | 7305534 | 1636400 | HMG-box transcription factor 1                                                | Hbp1  | 27080  | 1,31 | down |
| 6212583 | 7305534 | 1636401 | HMG-box transcription factor 1                                                | Hbp1  | 27080  | 1,13 | down |
| 6225664 | 7305534 | 1636406 | HMG-box transcription factor 1                                                | Hbp1  | 27080  | 1,02 | up   |
| 6225682 | 7305534 | 1636407 | HMG-box transcription factor 1                                                | Hbp1  | 27080  | 1,10 | up   |
| 6640651 | 7305534 | 1636408 | HMG-box transcription factor 1                                                | Hbp1  | 27080  | 1,12 | up   |
| 6693692 | 7305534 | 1636404 | HMG-box transcription factor 1                                                | Hbp1  | 27080  | 1,10 | up   |
| 5661571 | 7091954 | 1107734 | holocarboxylase synthetase (biotin-(proprionyl-Coenzyme A-carboxylase (ATP-hy | Hlcs  | 288240 | 2,47 | up   |
| 5706048 | 7091954 | 1107703 | holocarboxylase synthetase (biotin-(proprionyl-Coenzyme A-carboxylase (ATP-hy | Hlcs  | 288240 | 1,15 | down |
| 5999122 | 7091954 | 1107730 | holocarboxylase synthetase (biotin-(proprionyl-Coenzyme A-carboxylase (ATP-hy | Hlcs  | 288240 | 1,04 | down |
| 5838959 | 7264797 | 1534435 | homeo box A4                                                                  | Hoxa4 | 24453  | 2,51 | up   |
| 6182192 | 7264797 | 1534435 | homeo box A4                                                                  | Hoxa4 | 24453  | 1,09 | down |
| 6428165 | 7264797 | 1534435 | homeo box A4                                                                  | Hoxa4 | 24453  | 1,37 | up   |
| 6549100 | 7264797 | 1534435 | homeo box A4                                                                  | Hoxa4 | 24453  | 1,38 | down |
| 5785131 | 7264797 | 1534441 | homeo box A5                                                                  | Hoxa5 | 79241  | 1,20 | up   |
| 6024830 | 7264797 | 1534440 | homeo box A5                                                                  | Hoxa5 | 79241  | 1,53 | down |
| 6122533 | 7264797 | 1534439 | homeo box A5                                                                  | Hoxa5 | 79241  | 1,07 | down |
| 6361581 | 7071616 | 1060069 | homeo box B1                                                                  | Hoxb1 | 303491 | 1,02 | up   |
| 5728285 | 7323375 | 1679417 | host cell factor C2                                                           | Hcfc2 | 314704 | 1,15 | up   |
| 5843571 | 7323375 | 1679413 | host cell factor C2                                                           | Hcfc2 | 314704 | 1,27 | up   |
| 5925578 | 7323375 | 1679409 | host cell factor C2                                                           | Hcfc2 | 314704 | 1,38 | down |
| 6008609 | 7323375 | 1679414 | host cell factor C2                                                           | Hcfc2 | 314704 | 2,45 | up   |
| 6033422 | 7323375 | 1679412 | host cell factor C2                                                           | Hcfc2 | 314704 | 1,03 | up   |
| 6132081 | 7323375 | 1679423 | host cell factor C2                                                           | Hcfc2 | 314704 | 1,15 | up   |
| 6201195 | 7323375 | 1679418 | host cell factor C2                                                           | Hcfc2 | 314704 | 1,08 | up   |
| 6334283 | 7323375 | 1679416 | host cell factor C2                                                           | Hcfc2 | 314704 | 1,15 | up   |
| 6341927 | 7323375 | 1679411 | host cell factor C2                                                           | Hcfc2 | 314704 | 1,02 | up   |
| 6389439 | 7323375 | 1679415 | host cell factor C2                                                           | Hcfc2 | 314704 | 1,10 | up   |
| 6432907 | 7323375 | 1679410 | host cell factor C2                                                           | Hcfc2 | 314704 | 1,15 | down |
| 6445101 | 7323375 | 1679421 | host cell factor C2                                                           | Hcfc2 | 314704 | 1,15 | down |

|         |         |         |                                                                |        |        |      |      |
|---------|---------|---------|----------------------------------------------------------------|--------|--------|------|------|
| 6523711 | 7323375 | 1679420 | host cell factor C2                                            | Hcfc2  | 314704 | 1,05 | up   |
| 6592335 | 7323375 | 1679422 | host cell factor C2                                            | Hcfc2  | 314704 | 1,04 | down |
| 6667301 | 7323375 | 1679418 | host cell factor C2                                            | Hcfc2  | 314704 | 1,83 | up   |
| 6681046 | 7323375 | 1679419 | host cell factor C2                                            | Hcfc2  | 314704 | 1,27 | down |
| 6087041 | 7158408 | 1271348 | HS1 binding protein                                            | Hs1bp1 | 291202 | 1,04 | down |
| 6121514 | 7158408 | 1271348 | HS1 binding protein                                            | Hs1bp1 | 291202 | 1,20 | down |
| 6202526 | 7158408 | 1271348 | HS1 binding protein                                            | Hs1bp1 | 291202 | 1,02 | down |
| 6240054 | 7158408 | 1271348 | HS1 binding protein                                            | Hs1bp1 | 291202 | 1,08 | up   |
| 6439968 | 7158408 | 1271348 | HS1 binding protein                                            | Hs1bp1 | 291202 | 1,21 | down |
| 6681118 | 7158408 | 1271348 | HS1 binding protein                                            | Hs1bp1 | 291202 | 1,36 | down |
| 5723996 | 7163227 | 1282804 | human immunodeficiency virus type I enhancer binding protein 1 | Hivep1 | 117140 | 1,05 | up   |
| 5764703 | 7163227 | 1282806 | human immunodeficiency virus type I enhancer binding protein 1 | Hivep1 | 117140 | 1,15 | up   |
| 5771023 | 7163227 | 1282794 | human immunodeficiency virus type I enhancer binding protein 1 | Hivep1 | 117140 | 1,08 | down |
| 5812387 | 7163227 | 1282799 | human immunodeficiency virus type I enhancer binding protein 1 | Hivep1 | 117140 | 1,18 | up   |
| 6045615 | 7163227 | 1282806 | human immunodeficiency virus type I enhancer binding protein 1 | Hivep1 | 117140 | 1,01 | up   |
| 6092137 | 7163227 | 1282795 | human immunodeficiency virus type I enhancer binding protein 1 | Hivep1 | 117140 | 1,17 | up   |
| 6093194 | 7163227 | 1282792 | human immunodeficiency virus type I enhancer binding protein 1 | Hivep1 | 117140 | 1,22 | down |
| 6102253 | 7163227 | 1282804 | human immunodeficiency virus type I enhancer binding protein 1 | Hivep1 | 117140 | 1,06 | up   |
| 6180582 | 7163227 | 1282806 | human immunodeficiency virus type I enhancer binding protein 1 | Hivep1 | 117140 | 1,02 | up   |
| 6214298 | 7163227 | 1282791 | human immunodeficiency virus type I enhancer binding protein 1 | Hivep1 | 117140 | 1,78 | down |
| 6251380 | 7163227 | 1282806 | human immunodeficiency virus type I enhancer binding protein 1 | Hivep1 | 117140 | 1,17 | up   |
| 6260171 | 7163227 | 1282820 | human immunodeficiency virus type I enhancer binding protein 1 | Hivep1 | 117140 | 1,31 | up   |
| 6280132 | 7163227 | 1282803 | human immunodeficiency virus type I enhancer binding protein 1 | Hivep1 | 117140 | 1,04 | up   |
| 6296422 | 7163227 | 1282792 | human immunodeficiency virus type I enhancer binding protein 1 | Hivep1 | 117140 | 2,29 | up   |
| 6307952 | 7163227 | 1282807 | human immunodeficiency virus type I enhancer binding protein 1 | Hivep1 | 117140 | 1,21 | up   |
| 6314705 | 7163227 | 1282792 | human immunodeficiency virus type I enhancer binding protein 1 | Hivep1 | 117140 | 1,20 | up   |
| 6343908 | 7163227 | 1282811 | human immunodeficiency virus type I enhancer binding protein 1 | Hivep1 | 117140 | 1,46 | down |
| 6357911 | 7163227 | 1282801 | human immunodeficiency virus type I enhancer binding protein 1 | Hivep1 | 117140 | 1,30 | down |
| 6383244 | 7163227 | 1282792 | human immunodeficiency virus type I enhancer binding protein 1 | Hivep1 | 117140 | 1,41 | down |
| 6568688 | 7163227 | 1282800 | human immunodeficiency virus type I enhancer binding protein 1 | Hivep1 | 117140 | 1,19 | up   |
| 6582064 | 7163227 | 1282804 | human immunodeficiency virus type I enhancer binding protein 1 | Hivep1 | 117140 | 1,20 | down |
| 6619564 | 7163227 | 1282804 | human immunodeficiency virus type I enhancer binding protein 1 | Hivep1 | 117140 | 1,14 | up   |
| 6639519 | 7163227 | 1282804 | human immunodeficiency virus type I enhancer binding protein 1 | Hivep1 | 117140 | 1,17 | up   |
| 6716830 | 7163227 | 1282807 | human immunodeficiency virus type I enhancer binding protein 1 | Hivep1 | 117140 | 1,15 | up   |
| 5650688 | 7279073 | 1570753 | human immunodeficiency virus type I enhancer binding protein 3 | Hivep3 | 313557 | 1,01 | up   |
| 5796006 | 7279073 | 1570730 | human immunodeficiency virus type I enhancer binding protein 3 | Hivep3 | 313557 | 1,35 | down |
| 5868301 | 7279073 | 1570742 | human immunodeficiency virus type I enhancer binding protein 3 | Hivep3 | 313557 | 1,42 | up   |
| 5874695 | 7279073 | 1570753 | human immunodeficiency virus type I enhancer binding protein 3 | Hivep3 | 313557 | 1,11 | down |
| 5883947 | 7279073 | 1570742 | human immunodeficiency virus type I enhancer binding protein 3 | Hivep3 | 313557 | 1,80 | up   |
| 5964049 | 7279073 | 1570749 | human immunodeficiency virus type I enhancer binding protein 3 | Hivep3 | 313557 | 1,05 | down |
| 6100709 | 7279073 | 1570754 | human immunodeficiency virus type I enhancer binding protein 3 | Hivep3 | 313557 | 1,08 | down |
| 6184777 | 7279073 | 1570730 | human immunodeficiency virus type I enhancer binding protein 3 | Hivep3 | 313557 | 1,47 | down |
| 6196516 | 7279073 | 1570753 | human immunodeficiency virus type I enhancer binding protein 3 | Hivep3 | 313557 | 1,15 | up   |
| 6289210 | 7279073 | 1570744 | human immunodeficiency virus type I enhancer binding protein 3 | Hivep3 | 313557 | 1,25 | down |
| 6318292 | 7279073 | 1570742 | human immunodeficiency virus type I enhancer binding protein 3 | Hivep3 | 313557 | 1,33 | up   |
| 6413378 | 7279073 | 1570754 | human immunodeficiency virus type I enhancer binding protein 3 | Hivep3 | 313557 | 1,20 | up   |
| 6447908 | 7279073 | 1570753 | human immunodeficiency virus type I enhancer binding protein 3 | Hivep3 | 313557 | 1,47 | down |
| 6476166 | 7279073 | 1570755 | human immunodeficiency virus type I enhancer binding protein 3 | Hivep3 | 313557 | 1,09 | down |
| 6476389 | 7279073 | 1570753 | human immunodeficiency virus type I enhancer binding protein 3 | Hivep3 | 313557 | 1,35 | up   |
| 6589606 | 7279073 | 1570741 | human immunodeficiency virus type I enhancer binding protein 3 | Hivep3 | 313557 | 1,03 | up   |
| 6694399 | 7279073 | 1570750 | human immunodeficiency virus type I enhancer binding protein 3 | Hivep3 | 313557 | 1,99 | down |
| 5848025 | 7210593 | 1400503 | hyaluronan and proteoglycan link protein 2                     | Hapln2 | 64057  | 1,31 | up   |
| 6015468 | 7210593 | 1400501 | hyaluronan and proteoglycan link protein 2                     | Hapln2 | 64057  | 1,76 | down |
| 6033309 | 7210593 | 1400502 | hyaluronan and proteoglycan link protein 2                     | Hapln2 | 64057  | 1,14 | up   |
| 6088991 | 7210593 | 1400500 | hyaluronan and proteoglycan link protein 2                     | Hapln2 | 64057  | 1,11 | down |
| 6109176 | 7210593 | 1400496 | hyaluronan and proteoglycan link protein 2                     | Hapln2 | 64057  | 1,01 | up   |

|         |         |         |                                                                         |            |        |      |      |
|---------|---------|---------|-------------------------------------------------------------------------|------------|--------|------|------|
| 6288435 | 7210593 | 1400497 | hyaluronan and proteoglycan link protein 2                              | Hapln2     | 64057  | 1,90 | down |
| 6323076 | 7210593 | 1400499 | hyaluronan and proteoglycan link protein 2                              | Hapln2     | 64057  | 2,37 | down |
| 6564882 | 7210593 | 1400500 | hyaluronan and proteoglycan link protein 2                              | Hapln2     | 64057  | 1,31 | down |
| 6587905 | 7210593 | 1400498 | hyaluronan and proteoglycan link protein 2                              | Hapln2     | 64057  | 1,67 | up   |
| 5684642 | 7075573 | 1069663 | hydroxyacylglutathione hydrolase-like                                   | Haghl      | 302995 | 1,08 | down |
| 5748497 | 7075573 | 1069662 | hydroxyacylglutathione hydrolase-like                                   | Haghl      | 302995 | 1,12 | down |
| 5776720 | 7075573 | 1069662 | hydroxyacylglutathione hydrolase-like                                   | Haghl      | 302995 | 1,24 | up   |
| 5835100 | 7075573 | 1069659 | hydroxyacylglutathione hydrolase-like                                   | Haghl      | 302995 | 1,09 | up   |
| 5840759 | 7075573 | 1069658 | hydroxyacylglutathione hydrolase-like                                   | Haghl      | 302995 | 1,28 | up   |
| 6033092 | 7075573 | 1069662 | hydroxyacylglutathione hydrolase-like                                   | Haghl      | 302995 | 2,17 | down |
| 6063883 | 7075573 | 1069663 | hydroxyacylglutathione hydrolase-like                                   | Haghl      | 302995 | 1,39 | up   |
| 6105999 | 7075573 | 1069658 | hydroxyacylglutathione hydrolase-like                                   | Haghl      | 302995 | 1,41 | up   |
| 6140406 | 7075573 | 1069658 | hydroxyacylglutathione hydrolase-like                                   | Haghl      | 302995 | 1,12 | down |
| 6180704 | 7075573 | 1069661 | hydroxyacylglutathione hydrolase-like                                   | Haghl      | 302995 | 1,20 | down |
| 6192294 | 7075573 | 1069658 | hydroxyacylglutathione hydrolase-like                                   | Haghl      | 302995 | 1,01 | up   |
| 6337558 | 7075573 | 1069663 | hydroxyacylglutathione hydrolase-like                                   | Haghl      | 302995 | 1,09 | down |
| 6489797 | 7075573 | 1069664 | hydroxyacylglutathione hydrolase-like                                   | Haghl      | 302995 | 1,21 | down |
| 6635696 | 7075573 | 1069661 | hydroxyacylglutathione hydrolase-like                                   | Haghl      | 302995 | 1,19 | down |
| 6669910 | 7075573 | 1069660 | hydroxyacylglutathione hydrolase-like                                   | Haghl      | 302995 | 1,22 | up   |
| 6703536 | 7075573 | 1069664 | hydroxyacylglutathione hydrolase-like                                   | Haghl      | 302995 | 1,18 | down |
| 5638272 | 7225705 | 1436530 | HypB, AroK, ADK and rho factor domain containing protein RGD1303144     | RGD1303144 | 311833 | 1,17 | down |
| 5662922 | 7225705 | 1436519 | HypB, AroK, ADK and rho factor domain containing protein RGD1303144     | RGD1303144 | 311833 | 1,63 | up   |
| 5671511 | 7225705 | 1436520 | HypB, AroK, ADK and rho factor domain containing protein RGD1303144     | RGD1303144 | 311833 | 1,01 | up   |
| 5676725 | 7225705 | 1436525 | HypB, AroK, ADK and rho factor domain containing protein RGD1303144     | RGD1303144 | 311833 | 1,20 | down |
| 5680111 | 7225705 | 1436528 | HypB, AroK, ADK and rho factor domain containing protein RGD1303144     | RGD1303144 | 311833 | 1,19 | down |
| 5692251 | 7225705 | 1436527 | HypB, AroK, ADK and rho factor domain containing protein RGD1303144     | RGD1303144 | 311833 | 1,22 | down |
| 5773136 | 7225705 | 1436530 | HypB, AroK, ADK and rho factor domain containing protein RGD1303144     | RGD1303144 | 311833 | 1,16 | down |
| 6033162 | 7225705 | 1436523 | HypB, AroK, ADK and rho factor domain containing protein RGD1303144     | RGD1303144 | 311833 | 1,61 | up   |
| 6091898 | 7225705 | 1436518 | HypB, AroK, ADK and rho factor domain containing protein RGD1303144     | RGD1303144 | 311833 | 1,52 | up   |
| 6164332 | 7225705 | 1436521 | HypB, AroK, ADK and rho factor domain containing protein RGD1303144     | RGD1303144 | 311833 | 1,31 | up   |
| 6270305 | 7225705 | 1436526 | HypB, AroK, ADK and rho factor domain containing protein RGD1303144     | RGD1303144 | 311833 | 1,53 | down |
| 6334609 | 7225705 | 1436522 | HypB, AroK, ADK and rho factor domain containing protein RGD1303144     | RGD1303144 | 311833 | 1,06 | down |
| 6372460 | 7225705 | 1436529 | HypB, AroK, ADK and rho factor domain containing protein RGD1303144     | RGD1303144 | 311833 | 2,02 | down |
| 6611282 | 7225705 | 1436531 | HypB, AroK, ADK and rho factor domain containing protein RGD1303144     | RGD1303144 | 311833 | 1,43 | up   |
| 6643263 | 7225705 | 1436524 | HypB, AroK, ADK and rho factor domain containing protein RGD1303144     | RGD1303144 | 311833 | 1,37 | down |
| 5824374 | 7095475 | 1116051 | hypermethylated in cancer 2                                             | Hic2       | 287940 | 1,28 | up   |
| 5996522 | 7095475 | 1116052 | hypermethylated in cancer 2                                             | Hic2       | 287940 | 1,04 | down |
| 6136362 | 7095475 | 1116055 | hypermethylated in cancer 2                                             | Hic2       | 287940 | 1,11 | up   |
| 6410831 | 7095475 | 1116051 | hypermethylated in cancer 2                                             | Hic2       | 287940 | 1,49 | down |
| 6487046 | 7095475 | 1116050 | hypermethylated in cancer 2                                             | Hic2       | 287940 | 1,02 | up   |
| 6533284 | 7095475 | 1116051 | hypermethylated in cancer 2                                             | Hic2       | 287940 | 2,19 | up   |
| 5638189 | 7189987 | 1349806 | hyperpolarization-activated cyclic nucleotide-gated potassium channel 1 | Hcn1       | 84390  | 2,68 | up   |
| 5684294 | 7189987 | 1349809 | hyperpolarization-activated cyclic nucleotide-gated potassium channel 1 | Hcn1       | 84390  | 1,71 | up   |
| 5701181 | 7189987 | 1349806 | hyperpolarization-activated cyclic nucleotide-gated potassium channel 1 | Hcn1       | 84390  | 1,14 | up   |
| 5709030 | 7189987 | 1349808 | hyperpolarization-activated cyclic nucleotide-gated potassium channel 1 | Hcn1       | 84390  | 1,32 | down |
| 5722121 | 7189987 | 1349807 | hyperpolarization-activated cyclic nucleotide-gated potassium channel 1 | Hcn1       | 84390  | 1,02 | down |
| 5873953 | 7189987 | 1349813 | hyperpolarization-activated cyclic nucleotide-gated potassium channel 1 | Hcn1       | 84390  | 1,01 | down |
| 6033333 | 7189987 | 1349810 | hyperpolarization-activated cyclic nucleotide-gated potassium channel 1 | Hcn1       | 84390  | 1,25 | down |
| 6047610 | 7189987 | 1349809 | hyperpolarization-activated cyclic nucleotide-gated potassium channel 1 | Hcn1       | 84390  | 1,07 | up   |
| 6107427 | 7189987 | 1349811 | hyperpolarization-activated cyclic nucleotide-gated potassium channel 1 | Hcn1       | 84390  | 1,07 | down |
| 6127387 | 7189987 | 1349811 | hyperpolarization-activated cyclic nucleotide-gated potassium channel 1 | Hcn1       | 84390  | 1,18 | up   |
| 6363162 | 7189987 | 1349813 | hyperpolarization-activated cyclic nucleotide-gated potassium channel 1 | Hcn1       | 84390  | 1,34 | down |
| 6451834 | 7189987 | 1349808 | hyperpolarization-activated cyclic nucleotide-gated potassium channel 1 | Hcn1       | 84390  | 1,04 | up   |
| 6516832 | 7189987 | 1349812 | hyperpolarization-activated cyclic nucleotide-gated potassium channel 1 | Hcn1       | 84390  | 1,73 | down |
| 6658298 | 7189987 | 1349813 | hyperpolarization-activated cyclic nucleotide-gated potassium channel 1 | Hcn1       | 84390  | 1,07 | up   |
| 6662754 | 7189987 | 1349806 | hyperpolarization-activated cyclic nucleotide-gated potassium channel 1 | Hcn1       | 84390  | 1,27 | up   |

|         |         |         |                                                                         |            |        |      |      |
|---------|---------|---------|-------------------------------------------------------------------------|------------|--------|------|------|
| 6701013 | 7189987 | 1349806 | hyperpolarization-activated cyclic nucleotide-gated potassium channel 1 | Hcn1       | 84390  | 2,34 | down |
| 6109898 | 7039268 | 983668  | hypothetical gene supported by BC078985                                 | LOC499306  | 499306 | 1,00 | down |
| 6122196 | 7039268 | 983662  | hypothetical gene supported by BC078985                                 | LOC499306  | 499306 | 1,76 | down |
| 6232910 | 7039268 | 983667  | hypothetical gene supported by BC078985                                 | LOC499306  | 499306 | 1,24 | up   |
| 6243319 | 7039268 | 983664  | hypothetical gene supported by BC078985                                 | LOC499306  | 499306 | 1,94 | down |
| 6321979 | 7039268 | 983671  | hypothetical gene supported by BC078985                                 | LOC499306  | 499306 | 2,09 | up   |
| 6447014 | 7039268 | 983671  | hypothetical gene supported by BC078985                                 | LOC499306  | 499306 | 2,25 | up   |
| 6447880 | 7039268 | 983669  | hypothetical gene supported by BC078985                                 | LOC499306  | 499306 | 1,31 | down |
| 6497521 | 7039268 | 983665  | hypothetical gene supported by BC078985                                 | LOC499306  | 499306 | 1,10 | down |
| 6518372 | 7039268 | 983670  | hypothetical gene supported by BC078985                                 | LOC499306  | 499306 | 2,17 | up   |
| 6634058 | 7039268 | 983663  | hypothetical gene supported by BC078985                                 | LOC499306  | 499306 | 1,91 | down |
| 6737006 | 7039268 | 983666  | hypothetical gene supported by BC078985                                 | LOC499306  | 499306 | 1,76 | down |
| 5677839 | 7333100 | 1702831 | hypothetical gene supported by BC088439                                 | LOC500947  | 500947 | 1,82 | up   |
| 6582991 | 7333100 | 1702830 | hypothetical gene supported by BC088439                                 | LOC500947  | 500947 | 1,00 | down |
| 5669381 | 7274780 | 1559206 | hypothetical LOC298077                                                  | RGD1305807 | 298077 | 1,01 | up   |
| 5674211 | 7274780 | 1559192 | hypothetical LOC298077                                                  | RGD1305807 | 298077 | 1,49 | up   |
| 5701839 | 7274780 | 1559203 | hypothetical LOC298077                                                  | RGD1305807 | 298077 | 1,04 | down |
| 5843744 | 7274780 | 1559189 | hypothetical LOC298077                                                  | RGD1305807 | 298077 | 1,53 | up   |
| 5917714 | 7274780 | 1559187 | hypothetical LOC298077                                                  | RGD1305807 | 298077 | 1,21 | up   |
| 6151986 | 7274780 | 1559188 | hypothetical LOC298077                                                  | RGD1305807 | 298077 | 1,08 | up   |
| 6322813 | 7274780 | 1559182 | hypothetical LOC298077                                                  | RGD1305807 | 298077 | 1,02 | up   |
| 6323130 | 7274780 | 1559195 | hypothetical LOC298077                                                  | RGD1305807 | 298077 | 1,06 | up   |
| 6382294 | 7274780 | 1559191 | hypothetical LOC298077                                                  | RGD1305807 | 298077 | 1,28 | up   |
| 6432878 | 7274780 | 1559196 | hypothetical LOC298077                                                  | RGD1305807 | 298077 | 1,26 | up   |
| 6483952 | 7274780 | 1559193 | hypothetical LOC298077                                                  | RGD1305807 | 298077 | 1,48 | down |
| 6488212 | 7274780 | 1559204 | hypothetical LOC298077                                                  | RGD1305807 | 298077 | 1,16 | up   |
| 6514523 | 7274780 | 1559207 | hypothetical LOC298077                                                  | RGD1305807 | 298077 | 2,22 | up   |
| 6540806 | 7274780 | 1559198 | hypothetical LOC298077                                                  | RGD1305807 | 298077 | 2,31 | up   |
| 6654815 | 7274780 | 1559202 | hypothetical LOC298077                                                  | RGD1305807 | 298077 | 1,25 | down |
| 6662964 | 7274780 | 1559190 | hypothetical LOC298077                                                  | RGD1305807 | 298077 | 1,26 | up   |
| 6682324 | 7274780 | 1559201 | hypothetical LOC298077                                                  | RGD1305807 | 298077 | 1,12 | down |
| 6692761 | 7274780 | 1559205 | hypothetical LOC298077                                                  | RGD1305807 | 298077 | 1,55 | up   |
| 6717905 | 7274780 | 1559207 | hypothetical LOC298077                                                  | RGD1305807 | 298077 | 1,19 | up   |
| 5631098 | 7231958 | 1452577 | hypothetical LOC302884                                                  | MGC105649  | 302884 | 1,17 | down |
| 5673656 | 7231958 | 1452577 | hypothetical LOC302884                                                  | MGC105649  | 302884 | 2,06 | up   |
| 5709168 | 7231958 | 1452575 | hypothetical LOC302884                                                  | MGC105649  | 302884 | 1,14 | up   |
| 5794807 | 7231958 | 1452577 | hypothetical LOC302884                                                  | MGC105649  | 302884 | 1,82 | up   |
| 5821390 | 7231958 | 1452577 | hypothetical LOC302884                                                  | MGC105649  | 302884 | 1,01 | down |
| 5828079 | 7231958 | 1452574 | hypothetical LOC302884                                                  | MGC105649  | 302884 | 1,81 | up   |
| 5941839 | 7231958 | 1452577 | hypothetical LOC302884                                                  | MGC105649  | 302884 | 1,43 | down |
| 5981788 | 7231958 | 1452574 | hypothetical LOC302884                                                  | MGC105649  | 302884 | 2,39 | up   |
| 6248166 | 7231958 | 1452577 | hypothetical LOC302884                                                  | MGC105649  | 302884 | 1,21 | down |
| 6423962 | 7231958 | 1452577 | hypothetical LOC302884                                                  | MGC105649  | 302884 | 1,18 | down |
| 5634087 | 7059449 | 1030298 | hypothetical LOC309150                                                  | RGD1308234 | 309150 | 1,04 | up   |
| 5728085 | 7059449 | 1030301 | hypothetical LOC309150                                                  | RGD1308234 | 309150 | 1,18 | up   |
| 5858420 | 7059449 | 1030303 | hypothetical LOC309150                                                  | RGD1308234 | 309150 | 1,14 | up   |
| 6001651 | 7059449 | 1030301 | hypothetical LOC309150                                                  | RGD1308234 | 309150 | 1,15 | up   |
| 6086899 | 7059449 | 1030297 | hypothetical LOC309150                                                  | RGD1308234 | 309150 | 1,10 | up   |
| 6130359 | 7059449 | 1030303 | hypothetical LOC309150                                                  | RGD1308234 | 309150 | 1,54 | up   |
| 6141787 | 7059449 | 1030302 | hypothetical LOC309150                                                  | RGD1308234 | 309150 | 1,16 | up   |
| 6164158 | 7059449 | 1030297 | hypothetical LOC309150                                                  | RGD1308234 | 309150 | 1,10 | up   |
| 6237777 | 7059449 | 1030298 | hypothetical LOC309150                                                  | RGD1308234 | 309150 | 1,00 | down |
| 6248043 | 7059449 | 1030297 | hypothetical LOC309150                                                  | RGD1308234 | 309150 | 1,02 | down |
| 6329220 | 7059449 | 1030297 | hypothetical LOC309150                                                  | RGD1308234 | 309150 | 1,03 | down |
| 6437576 | 7059449 | 1030300 | hypothetical LOC309150                                                  | RGD1308234 | 309150 | 1,08 | up   |
| 6471638 | 7059449 | 1030297 | hypothetical LOC309150                                                  | RGD1308234 | 309150 | 2,30 | down |

|         |         |         |                                |            |        |      |      |
|---------|---------|---------|--------------------------------|------------|--------|------|------|
| 6555452 | 7059449 | 1030299 | hypothetical LOC309150         | RGD1308234 | 309150 | 1,22 | down |
| 6658195 | 7059449 | 1030300 | hypothetical LOC309150         | RGD1308234 | 309150 | 1,71 | up   |
| 6734265 | 7059449 | 1030301 | hypothetical LOC309150         | RGD1308234 | 309150 | 1,91 | down |
| 5703231 | 7194172 | 1361184 | hypothetical LOC499618         | LOC499618  | 499618 | 1,19 | up   |
| 5733561 | 7194172 | 1361184 | hypothetical LOC499618         | LOC499618  | 499618 | 1,24 | up   |
| 5867029 | 7194172 | 1361184 | hypothetical LOC499618         | LOC499618  | 499618 | 1,03 | up   |
| 5935080 | 7194172 | 1361178 | hypothetical LOC499618         | LOC499618  | 499618 | 1,21 | up   |
| 6123831 | 7194172 | 1361179 | hypothetical LOC499618         | LOC499618  | 499618 | 1,10 | up   |
| 6236956 | 7194172 | 1361175 | hypothetical LOC499618         | LOC499618  | 499618 | 1,34 | up   |
| 6242084 | 7194172 | 1361185 | hypothetical LOC499618         | LOC499618  | 499618 | 1,00 | down |
| 6294308 | 7194172 | 1361170 | hypothetical LOC499618         | LOC499618  | 499618 | 1,10 | up   |
| 6297539 | 7194172 | 1361184 | hypothetical LOC499618         | LOC499618  | 499618 | 1,10 | up   |
| 6333313 | 7194172 | 1361171 | hypothetical LOC499618         | LOC499618  | 499618 | 1,06 | up   |
| 6462441 | 7194172 | 1361184 | hypothetical LOC499618         | LOC499618  | 499618 | 1,11 | up   |
| 6505046 | 7194172 | 1361184 | hypothetical LOC499618         | LOC499618  | 499618 | 1,09 | up   |
| 6615974 | 7194172 | 1361181 | hypothetical LOC499618         | LOC499618  | 499618 | 1,18 | up   |
| 6723806 | 7194172 | 1361174 | hypothetical LOC499618         | LOC499618  | 499618 | 1,60 | up   |
| 6370278 | 7368565 | 1791272 | hypothetical LOC501092         | LOC501092  | 501092 | 1,17 | down |
| 5673501 | 7370996 | 1798826 | hypothetical LOC501391         | LOC501391  | 501391 | 1,03 | down |
| 5783969 | 7370996 | 1798824 | hypothetical LOC501391         | LOC501391  | 501391 | 2,21 | up   |
| 5859468 | 7370996 | 1798825 | hypothetical LOC501391         | LOC501391  | 501391 | 1,18 | down |
| 5877506 | 7370996 | 1798821 | hypothetical LOC501391         | LOC501391  | 501391 | 1,38 | up   |
| 5924526 | 7370996 | 1798822 | hypothetical LOC501391         | LOC501391  | 501391 | 1,10 | up   |
| 6143719 | 7370996 | 1798823 | hypothetical LOC501391         | LOC501391  | 501391 | 1,69 | up   |
| 5635920 | 7096952 | 1119673 | hypothetical protein LOC498154 | LOC498154  | 498154 | 2,47 | down |
| 6099737 | 7096952 | 1119669 | hypothetical protein LOC498154 | LOC498154  | 498154 | 1,24 | up   |
| 6356834 | 7096952 | 1119671 | hypothetical protein LOC498154 | LOC498154  | 498154 | 1,03 | down |
| 6368495 | 7096952 | 1119672 | hypothetical protein LOC498154 | LOC498154  | 498154 | 1,06 | down |
| 6442579 | 7096952 | 1119674 | hypothetical protein LOC498154 | LOC498154  | 498154 | 1,22 | down |
| 6508100 | 7096952 | 1119670 | hypothetical protein LOC498154 | LOC498154  | 498154 | 1,16 | up   |
| 5765742 | 7061550 | 1035300 | hypothetical protein LOC499339 | LOC499339  | 499339 | 1,16 | up   |
| 5785034 | 7061550 | 1035280 | hypothetical protein LOC499339 | LOC499339  | 499339 | 1,01 | up   |
| 5791461 | 7061550 | 1035286 | hypothetical protein LOC499339 | LOC499339  | 499339 | 1,47 | up   |
| 5797098 | 7061550 | 1035295 | hypothetical protein LOC499339 | LOC499339  | 499339 | 1,20 | up   |
| 5870254 | 7061550 | 1035296 | hypothetical protein LOC499339 | LOC499339  | 499339 | 1,88 | down |
| 5872610 | 7061550 | 1035299 | hypothetical protein LOC499339 | LOC499339  | 499339 | 1,61 | up   |
| 5913168 | 7061550 | 1035294 | hypothetical protein LOC499339 | LOC499339  | 499339 | 1,68 | up   |
| 5916585 | 7061550 | 1035279 | hypothetical protein LOC499339 | LOC499339  | 499339 | 1,48 | down |
| 5917990 | 7061550 | 1035290 | hypothetical protein LOC499339 | LOC499339  | 499339 | 1,04 | up   |
| 5920390 | 7061550 | 1035297 | hypothetical protein LOC499339 | LOC499339  | 499339 | 1,49 | up   |
| 6057891 | 7061550 | 1035293 | hypothetical protein LOC499339 | LOC499339  | 499339 | 1,07 | up   |
| 6089934 | 7061550 | 1035298 | hypothetical protein LOC499339 | LOC499339  | 499339 | 2,51 | down |
| 6144271 | 7061550 | 1035285 | hypothetical protein LOC499339 | LOC499339  | 499339 | 1,59 | up   |
| 6197971 | 7061550 | 1035289 | hypothetical protein LOC499339 | LOC499339  | 499339 | 1,09 | down |
| 6231102 | 7061550 | 1035281 | hypothetical protein LOC499339 | LOC499339  | 499339 | 1,09 | down |
| 6398244 | 7061550 | 1035284 | hypothetical protein LOC499339 | LOC499339  | 499339 | 1,62 | down |
| 6675121 | 7061550 | 1035301 | hypothetical protein LOC499339 | LOC499339  | 499339 | 1,88 | down |
| 6699066 | 7061550 | 1035292 | hypothetical protein LOC499339 | LOC499339  | 499339 | 1,30 | up   |
| 5910631 | 7219694 | 1422262 | hypothetical protein LOC499465 | LOC499465  | 499465 | 1,03 | down |
| 6044138 | 7219694 | 1422264 | hypothetical protein LOC499465 | LOC499465  | 499465 | 2,23 | down |
| 6149502 | 7219694 | 1422265 | hypothetical protein LOC499465 | LOC499465  | 499465 | 1,00 | down |
| 6191696 | 7219694 | 1422266 | hypothetical protein LOC499465 | LOC499465  | 499465 | 1,01 | up   |
| 6543735 | 7219694 | 1422267 | hypothetical protein LOC499465 | LOC499465  | 499465 | 1,09 | up   |
| 6648959 | 7219694 | 1422263 | hypothetical protein LOC499465 | LOC499465  | 499465 | 1,01 | up   |
| 6655461 | 7219694 | 1422265 | hypothetical protein LOC499465 | LOC499465  | 499465 | 1,56 | up   |
| 5627690 | 7240665 | 1475819 | hypothetical protein LOC500684 | LOC500684  | 500684 | 1,04 | down |

|         |         |         |                                                                |                    |                   |      |      |
|---------|---------|---------|----------------------------------------------------------------|--------------------|-------------------|------|------|
| 5692916 | 7240665 | 1475839 | hypothetical protein LOC500684                                 | LOC500684          | 500684            | 1,36 | down |
| 5715622 | 7240665 | 1475818 | hypothetical protein LOC500684                                 | LOC500684          | 500684            | 1,08 | up   |
| 5816186 | 7240665 | 1475823 | hypothetical protein LOC500684                                 | LOC500684          | 500684            | 1,04 | down |
| 5855463 | 7240665 | 1475835 | hypothetical protein LOC500684                                 | LOC500684          | 500684            | 1,02 | up   |
| 5867508 | 7240665 | 1475821 | hypothetical protein LOC500684                                 | LOC500684          | 500684            | 1,07 | down |
| 5890191 | 7240665 | 1475831 | hypothetical protein LOC500684                                 | LOC500684          | 500684            | 1,08 | up   |
| 6012500 | 7240665 | 1475829 | hypothetical protein LOC500684                                 | LOC500684          | 500684            | 1,16 | up   |
| 6045888 | 7240665 | 1475830 | hypothetical protein LOC500684                                 | LOC500684          | 500684            | 1,19 | down |
| 6216423 | 7240665 | 1475822 | hypothetical protein LOC500684                                 | LOC500684          | 500684            | 1,12 | up   |
| 6505474 | 7240665 | 1475836 | hypothetical protein LOC500684                                 | LOC500684          | 500684            | 1,00 | up   |
| 6556968 | 7240665 | 1475815 | hypothetical protein LOC500684                                 | LOC500684          | 500684            | 1,05 | up   |
| 6639399 | 7240665 | 1475820 | hypothetical protein LOC500684                                 | LOC500684          | 500684            | 1,06 | up   |
| 6646663 | 7240665 | 1475828 | hypothetical protein LOC500684                                 | LOC500684          | 500684            | 1,40 | up   |
| 6655576 | 7240665 | 1475827 | hypothetical protein LOC500684                                 | LOC500684          | 500684            | 1,05 | up   |
| 6677097 | 7240665 | 1475836 | hypothetical protein LOC500684                                 | LOC500684          | 500684            | 1,04 | down |
| 6714515 | 7240665 | 1475837 | hypothetical protein LOC500684                                 | LOC500684          | 500684            | 1,50 | up   |
| 5803993 | 7222960 | 1430006 | hypothetical protein LOC606294                                 | LOC606294          | 606294            | 1,44 | up   |
| 5928969 | 7222960 | 1430006 | hypothetical protein LOC606294                                 | LOC606294          | 606294            | 1,03 | up   |
| 6001434 | 7222960 | 1430009 | hypothetical protein LOC606294                                 | LOC606294          | 606294            | 1,23 | up   |
| 6131300 | 7222960 | 1430006 | hypothetical protein LOC606294                                 | LOC606294          | 606294            | 1,14 | up   |
| 6159906 | 7222960 | 1430010 | hypothetical protein LOC606294                                 | LOC606294          | 606294            | 1,27 | down |
| 6176223 | 7222960 | 1430013 | hypothetical protein LOC606294                                 | LOC606294          | 606294            | 1,22 | down |
| 6257583 | 7222960 | 1430011 | hypothetical protein LOC606294                                 | LOC606294          | 606294            | 2,12 | down |
| 6301741 | 7222960 | 1430006 | hypothetical protein LOC606294                                 | LOC606294          | 606294            | 1,07 | up   |
| 6343561 | 7222960 | 1430014 | hypothetical protein LOC606294                                 | LOC606294          | 606294            | 1,03 | down |
| 6667307 | 7222960 | 1430015 | hypothetical protein LOC606294                                 | LOC606294          | 606294            | 1,50 | up   |
| 6715914 | 7222960 | 1430007 | hypothetical protein LOC606294                                 | LOC606294          | 606294            | 1,13 | down |
| 6226458 | 7313411 | 1655438 | hypothetical protein LOC679534                                 | LOC679534          | 679534            | 1,17 | down |
| 6202681 | 7313411 | 1655429 | hypothetical protein LOC679534 /// similar to FLJ25323 protein | '679534 /// RGD156 | 679534 /// 500819 | 1,05 | up   |
| 6473796 | 7313411 | 1655437 | hypothetical protein LOC679534 /// similar to FLJ25323 protein | '679534 /// RGD156 | 679534 /// 500819 | 2,55 | down |
| 6610429 | 7313411 | 1655438 | hypothetical protein LOC679534 /// similar to FLJ25323 protein | '679534 /// RGD156 | 679534 /// 500819 | 1,51 | up   |
| 5812344 | 7190524 | 1351171 | hypothetical protein LOC679830                                 | LOC679830          | 679830            | 2,76 | down |
| 5911896 | 7190524 | 1351180 | hypothetical protein LOC679830                                 | LOC679830          | 679830            | 1,09 | down |
| 5914228 | 7190524 | 1351182 | hypothetical protein LOC679830                                 | LOC679830          | 679830            | 1,16 | up   |
| 6366551 | 7190524 | 1351183 | hypothetical protein LOC679830                                 | LOC679830          | 679830            | 1,23 | down |
| 6396156 | 7190524 | 1351179 | hypothetical protein LOC679830                                 | LOC679830          | 679830            | 1,38 | up   |
| 6425516 | 7190524 | 1351171 | hypothetical protein LOC679830                                 | LOC679830          | 679830            | 1,19 | down |
| 6459700 | 7190524 | 1351179 | hypothetical protein LOC679830                                 | LOC679830          | 679830            | 1,09 | up   |
| 6588860 | 7190524 | 1351171 | hypothetical protein LOC679830                                 | LOC679830          | 679830            | 2,21 | down |
| 6639218 | 7190524 | 1351174 | hypothetical protein LOC679830                                 | LOC679830          | 679830            | 1,05 | up   |
| 6673384 | 7190524 | 1351176 | hypothetical protein LOC679830                                 | LOC679830          | 679830            | 1,08 | down |
| 6715023 | 7190524 | 1351178 | hypothetical protein LOC679830                                 | LOC679830          | 679830            | 1,06 | up   |
| 6741460 | 7190524 | 1351181 | hypothetical protein LOC679830                                 | LOC679830          | 679830            | 1,02 | down |
| 5663044 | 7190524 | 1351191 | hypothetical protein LOC679859                                 | LOC679859          | 679859            | 1,03 | down |
| 6327681 | 7190524 | 1351191 | hypothetical protein LOC679859                                 | LOC679859          | 679859            | 1,12 | down |
| 6416237 | 7190524 | 1351190 | hypothetical protein LOC679859                                 | LOC679859          | 679859            | 1,17 | down |
| 5718692 | 7120010 | 1177372 | hypothetical protein LOC680039                                 | LOC680039          | 680039            | 1,01 | up   |
| 5776806 | 7120010 | 1177381 | hypothetical protein LOC680039                                 | LOC680039          | 680039            | 1,01 | up   |
| 5834430 | 7120010 | 1177383 | hypothetical protein LOC680039                                 | LOC680039          | 680039            | 1,03 | up   |
| 5871238 | 7120010 | 1177385 | hypothetical protein LOC680039                                 | LOC680039          | 680039            | 1,06 | up   |
| 5877104 | 7120010 | 1177374 | hypothetical protein LOC680039                                 | LOC680039          | 680039            | 1,20 | up   |
| 5883900 | 7120010 | 1177386 | hypothetical protein LOC680039                                 | LOC680039          | 680039            | 1,23 | up   |
| 6264352 | 7120010 | 1177383 | hypothetical protein LOC680039                                 | LOC680039          | 680039            | 1,18 | up   |
| 6295152 | 7120010 | 1177374 | hypothetical protein LOC680039                                 | LOC680039          | 680039            | 1,03 | up   |
| 6465556 | 7120010 | 1177383 | hypothetical protein LOC680039                                 | LOC680039          | 680039            | 1,02 | down |
| 6474943 | 7120010 | 1177383 | hypothetical protein LOC680039                                 | LOC680039          | 680039            | 1,37 | down |

|         |         |         |                                |           |        |      |      |
|---------|---------|---------|--------------------------------|-----------|--------|------|------|
| 6556411 | 7120010 | 1177389 | hypothetical protein LOC680039 | LOC680039 | 680039 | 1,05 | down |
| 6682887 | 7120010 | 1177388 | hypothetical protein LOC680039 | LOC680039 | 680039 | 1,11 | down |
| 6700078 | 7120010 | 1177389 | hypothetical protein LOC680039 | LOC680039 | 680039 | 1,09 | down |
| 6729337 | 7120010 | 1177388 | hypothetical protein LOC680039 | LOC680039 | 680039 | 1,01 | up   |
| 6742501 | 7120010 | 1177382 | hypothetical protein LOC680039 | LOC680039 | 680039 | 2,96 | down |
| 5849123 | 7383655 | 1828576 | hypothetical protein LOC680282 | LOC680282 | 680282 | 1,04 | up   |
| 5896010 | 7383655 | 1828576 | hypothetical protein LOC680282 | LOC680282 | 680282 | 1,03 | down |
| 6139161 | 7383655 | 1828576 | hypothetical protein LOC680282 | LOC680282 | 680282 | 1,12 | up   |
| 6237433 | 7383655 | 1828575 | hypothetical protein LOC680282 | LOC680282 | 680282 | 1,12 | down |
| 6261381 | 7383655 | 1828573 | hypothetical protein LOC680282 | LOC680282 | 680282 | 1,46 | down |
| 6743610 | 7383655 | 1828576 | hypothetical protein LOC680282 | LOC680282 | 680282 | 2,03 | down |
| 5752954 | 7247334 | 1490821 | hypothetical protein LOC680485 | LOC680485 | 680485 | 1,60 | down |
| 5892153 | 7247334 | 1490820 | hypothetical protein LOC680485 | LOC680485 | 680485 | 2,10 | down |
| 6359761 | 7247334 | 1490815 | hypothetical protein LOC680485 | LOC680485 | 680485 | 1,79 | up   |
| 6542198 | 7247334 | 1490813 | hypothetical protein LOC680485 | LOC680485 | 680485 | 1,78 | up   |
| 6168193 | 7127691 | 1195642 | hypothetical protein LOC681091 | LOC681091 | 681091 | 1,14 | up   |
| 6482027 | 7127691 | 1195640 | hypothetical protein LOC681091 | LOC681091 | 681091 | 1,72 | up   |
| 5670864 | 7046595 | 1002396 | hypothetical protein LOC681210 | MGC94891  | 681210 | 1,63 | up   |
| 5705701 | 7046595 | 1002390 | hypothetical protein LOC681210 | MGC94891  | 681210 | 1,25 | up   |
| 5778057 | 7046595 | 1002388 | hypothetical protein LOC681210 | MGC94891  | 681210 | 1,51 | down |
| 6256942 | 7046595 | 1002393 | hypothetical protein LOC681210 | MGC94891  | 681210 | 2,23 | up   |
| 6273750 | 7046595 | 1002397 | hypothetical protein LOC681210 | MGC94891  | 681210 | 1,00 | up   |
| 6334707 | 7046595 | 1002392 | hypothetical protein LOC681210 | MGC94891  | 681210 | 1,61 | up   |
| 6368268 | 7046595 | 1002394 | hypothetical protein LOC681210 | MGC94891  | 681210 | 1,03 | down |
| 6415082 | 7046595 | 1002387 | hypothetical protein LOC681210 | MGC94891  | 681210 | 1,74 | down |
| 6450317 | 7046595 | 1002389 | hypothetical protein LOC681210 | MGC94891  | 681210 | 1,40 | up   |
| 6652676 | 7046595 | 1002391 | hypothetical protein LOC681210 | MGC94891  | 681210 | 1,22 | up   |
| 6744445 | 7046595 | 1002395 | hypothetical protein LOC681210 | MGC94891  | 681210 | 1,25 | down |
| 6160245 | 7369166 | 1793390 | hypothetical protein LOC685594 | LOC685594 | 685594 | 1,96 | down |
| 6365534 | 7369166 | 1793391 | hypothetical protein LOC685594 | LOC685594 | 685594 | 2,70 | down |
| 5779651 | 7358048 | 1764788 | hypothetical protein LOC685917 | LOC685917 | 685917 | 1,14 | up   |
| 6159983 | 7358048 | 1764789 | hypothetical protein LOC685917 | LOC685917 | 685917 | 1,14 | down |
| 5795810 | 7102369 | 1133434 | hypothetical protein LOC687361 | LOC687361 | 687361 | 1,72 | up   |
| 6609878 | 7056333 | 1023673 | hypothetical protein LOC687429 | LOC687429 | 687429 | 1,47 | down |
| 6163693 | 7031576 | 964107  | hypothetical protein LOC687984 | LOC687984 | 687984 | 1,08 | up   |
| 6167963 | 7031576 | 964108  | hypothetical protein LOC687984 | LOC687984 | 687984 | 1,12 | up   |
| 6640447 | 7031576 | 964108  | hypothetical protein LOC687984 | LOC687984 | 687984 | 1,10 | up   |
| 6708789 | 7031576 | 964105  | hypothetical protein LOC687984 | LOC687984 | 687984 | 1,39 | up   |
| 5655841 | 7083031 | 1086277 | hypothetical protein LOC688211 | LOC688211 | 688211 | 1,33 | down |
| 5746851 | 7083031 | 1086277 | hypothetical protein LOC688211 | LOC688211 | 688211 | 1,00 | up   |
| 5947305 | 7083031 | 1086277 | hypothetical protein LOC688211 | LOC688211 | 688211 | 1,11 | up   |
| 5952729 | 7083031 | 1086276 | hypothetical protein LOC688211 | LOC688211 | 688211 | 1,34 | down |
| 6002470 | 7083031 | 1086276 | hypothetical protein LOC688211 | LOC688211 | 688211 | 1,04 | up   |
| 6109851 | 7083031 | 1086277 | hypothetical protein LOC688211 | LOC688211 | 688211 | 1,09 | down |
| 6191055 | 7083031 | 1086276 | hypothetical protein LOC688211 | LOC688211 | 688211 | 1,16 | down |
| 6397393 | 7083031 | 1086278 | hypothetical protein LOC688211 | LOC688211 | 688211 | 1,15 | down |
| 6410107 | 7083031 | 1086277 | hypothetical protein LOC688211 | LOC688211 | 688211 | 1,22 | down |
| 6430566 | 7083031 | 1086279 | hypothetical protein LOC688211 | LOC688211 | 688211 | 1,31 | up   |
| 6448309 | 7083031 | 1086291 | hypothetical protein LOC688211 | LOC688211 | 688211 | 1,47 | down |
| 6608815 | 7083031 | 1086276 | hypothetical protein LOC688211 | LOC688211 | 688211 | 1,02 | up   |
| 5771533 | 7184850 | 1337599 | hypothetical protein LOC688736 | MGC116202 | 688736 | 1,21 | down |
| 5903596 | 7184850 | 1337599 | hypothetical protein LOC688736 | MGC116202 | 688736 | 1,08 | up   |
| 6013382 | 7184850 | 1337591 | hypothetical protein LOC688736 | MGC116202 | 688736 | 1,03 | up   |
| 6094964 | 7184850 | 1337599 | hypothetical protein LOC688736 | MGC116202 | 688736 | 1,22 | up   |
| 6104739 | 7184850 | 1337595 | hypothetical protein LOC688736 | MGC116202 | 688736 | 1,68 | down |
| 6131871 | 7184850 | 1337599 | hypothetical protein LOC688736 | MGC116202 | 688736 | 1,09 | up   |



|         |         |         |                                                                                                                       |                                    |                   |      |      |
|---------|---------|---------|-----------------------------------------------------------------------------------------------------------------------|------------------------------------|-------------------|------|------|
| 6217450 | 7184850 | 1337599 | hypothetical protein LOC688736                                                                                        | MGC116202                          | 688736            | 1,16 | down |
| 6354327 | 7184850 | 1337599 | hypothetical protein LOC688736                                                                                        | MGC116202                          | 688736            | 1,53 | up   |
| 6376746 | 7184850 | 1337599 | hypothetical protein LOC688736                                                                                        | MGC116202                          | 688736            | 1,19 | up   |
| 6400625 | 7184850 | 1337592 | hypothetical protein LOC688736                                                                                        | MGC116202                          | 688736            | 1,11 | down |
| 6505258 | 7184850 | 1337594 | hypothetical protein LOC688736                                                                                        | MGC116202                          | 688736            | 2,02 | down |
| 6537882 | 7184850 | 1337591 | hypothetical protein LOC688736                                                                                        | MGC116202                          | 688736            | 1,10 | down |
| 6581182 | 7184850 | 1337592 | hypothetical protein LOC688736                                                                                        | MGC116202                          | 688736            | 1,16 | down |
| 6658702 | 7184850 | 1337595 | hypothetical protein LOC688736                                                                                        | MGC116202                          | 688736            | 1,09 | up   |
| 6720933 | 7184850 | 1337593 | hypothetical protein LOC688736                                                                                        | MGC116202                          | 688736            | 1,12 | up   |
| 5769954 | 7267802 | 1541865 | hypothetical protein LOC689252                                                                                        | LOC689252                          | 689252            | 1,15 | down |
| 6131249 | 7267802 | 1541873 | hypothetical protein LOC689252                                                                                        | LOC689252                          | 689252            | 1,26 | down |
| 6031710 | 7371446 | 1800082 | hypothetical protein LOC689347 /// similar to spermatogenesis associated glutamyl-689347 /// LOC501 689347 /// 501325 | LOC689347                          | 689347            | 1,28 | up   |
| 5643780 | 7290161 | 1597071 | hypothetical protein LOC690079                                                                                        | LOC690079                          | 690079            | 1,12 | up   |
| 6085158 | 7290161 | 1597070 | hypothetical protein LOC690079                                                                                        | LOC690079                          | 690079            | 1,11 | up   |
| 6138409 | 7290161 | 1597071 | hypothetical protein LOC690079                                                                                        | LOC690079                          | 690079            | 2,09 | down |
| 6503630 | 7290161 | 1597071 | hypothetical protein LOC690079                                                                                        | LOC690079                          | 690079            | 1,02 | down |
| 6537995 | 7290161 | 1597071 | hypothetical protein LOC690079                                                                                        | LOC690079                          | 690079            | 1,06 | down |
| 6627909 | 7290161 | 1597071 | hypothetical protein LOC690079                                                                                        | LOC690079                          | 690079            | 1,26 | down |
| 5889491 | 7299204 | 1619540 | hypothetical protein LOC690208                                                                                        | LOC690208                          | 690208            | 1,01 | down |
| 6619263 | 7299204 | 1619538 | hypothetical protein LOC690208                                                                                        | LOC690208                          | 690208            | 2,39 | down |
| 6299623 | 7299204 | 1619540 | hypothetical protein LOC690208 /// similar to B0511.12                                                                | LOC690208 /// LOC690208 /// 690217 | 690208 /// 690217 | 1,03 | down |
| 5654469 | 7208710 | 1395895 | hypothetical protein LOC690333                                                                                        | LOC690333                          | 690333            | 1,44 | up   |
| 5727493 | 7208710 | 1395893 | hypothetical protein LOC690333                                                                                        | LOC690333                          | 690333            | 1,02 | down |
| 5829701 | 7208710 | 1395900 | hypothetical protein LOC690333                                                                                        | LOC690333                          | 690333            | 2,09 | down |
| 5943407 | 7208710 | 1395895 | hypothetical protein LOC690333                                                                                        | LOC690333                          | 690333            | 1,04 | up   |
| 6165709 | 7208710 | 1395894 | hypothetical protein LOC690333                                                                                        | LOC690333                          | 690333            | 1,05 | up   |
| 6181372 | 7208710 | 1395892 | hypothetical protein LOC690333                                                                                        | LOC690333                          | 690333            | 1,07 | down |
| 6237184 | 7208710 | 1395895 | hypothetical protein LOC690333                                                                                        | LOC690333                          | 690333            | 1,05 | up   |
| 6250580 | 7208710 | 1395901 | hypothetical protein LOC690333                                                                                        | LOC690333                          | 690333            | 1,48 | down |
| 6346733 | 7208710 | 1395893 | hypothetical protein LOC690333                                                                                        | LOC690333                          | 690333            | 1,44 | up   |
| 6714558 | 7208710 | 1395893 | hypothetical protein LOC690333                                                                                        | LOC690333                          | 690333            | 1,14 | down |
| 6738669 | 7208710 | 1395892 | hypothetical protein LOC690333                                                                                        | LOC690333                          | 690333            | 1,48 | up   |
| 6178340 | 7280959 | 1575040 | hypothetical protein LOC690449                                                                                        | LOC690449                          | 690449            | 1,25 | down |
| 5848275 | 7181026 | 1327837 | hypothetical protein LOC690682                                                                                        | LOC690682                          | 690682            | 1,08 | down |
| 6048345 | 7181026 | 1327832 | hypothetical protein LOC690682                                                                                        | LOC690682                          | 690682            | 2,34 | up   |
| 6313993 | 7032083 | 965651  | hypothetical protein LOC691443                                                                                        | LOC691443                          | 691443            | 1,01 | down |
| 5692263 | 7231152 | 1450271 | hypothetical protein LOC691543                                                                                        | LOC691543                          | 691543            | 1,65 | up   |
| 5714982 | 7231152 | 1450277 | hypothetical protein LOC691543                                                                                        | LOC691543                          | 691543            | 1,08 | up   |
| 5780797 | 7231152 | 1450268 | hypothetical protein LOC691543                                                                                        | LOC691543                          | 691543            | 1,24 | up   |
| 5845122 | 7231152 | 1450267 | hypothetical protein LOC691543                                                                                        | LOC691543                          | 691543            | 2,80 | up   |
| 5935087 | 7231152 | 1450273 | hypothetical protein LOC691543                                                                                        | LOC691543                          | 691543            | 2,76 | up   |
| 6006056 | 7231152 | 1450269 | hypothetical protein LOC691543                                                                                        | LOC691543                          | 691543            | 2,58 | up   |
| 6011877 | 7231152 | 1450277 | hypothetical protein LOC691543                                                                                        | LOC691543                          | 691543            | 1,64 | up   |
| 6092303 | 7231152 | 1450264 | hypothetical protein LOC691543                                                                                        | LOC691543                          | 691543            | 1,95 | up   |
| 6135404 | 7231152 | 1450272 | hypothetical protein LOC691543                                                                                        | LOC691543                          | 691543            | 2,62 | up   |
| 6209316 | 7231152 | 1450277 | hypothetical protein LOC691543                                                                                        | LOC691543                          | 691543            | 2,12 | up   |
| 6213295 | 7231152 | 1450274 | hypothetical protein LOC691543                                                                                        | LOC691543                          | 691543            | 1,96 | up   |
| 6255494 | 7231152 | 1450269 | hypothetical protein LOC691543                                                                                        | LOC691543                          | 691543            | 2,90 | up   |
| 6271899 | 7231152 | 1450270 | hypothetical protein LOC691543                                                                                        | LOC691543                          | 691543            | 2,15 | up   |
| 6254933 | 7231203 | 1450389 | hypothetical protein LOC691565                                                                                        | LOC691565                          | 691565            | 1,12 | down |
| 6441149 | 7231203 | 1450390 | hypothetical protein LOC691565                                                                                        | LOC691565                          | 691565            | 1,46 | up   |
| 5912891 | 7337314 | 1712893 | hypothetical protein LOC691572                                                                                        | LOC691572                          | 691572            | 1,09 | down |
| 6173579 | 7337314 | 1712894 | hypothetical protein LOC691572                                                                                        | LOC691572                          | 691572            | 1,04 | down |
| 6225759 | 7337314 | 1712892 | hypothetical protein LOC691572                                                                                        | LOC691572                          | 691572            | 1,15 | down |
| 6238163 | 7337314 | 1712897 | hypothetical protein LOC691572                                                                                        | LOC691572                          | 691572            | 1,15 | up   |
| 6350543 | 7337314 | 1712894 | hypothetical protein LOC691572                                                                                        | LOC691572                          | 691572            | 1,01 | down |

|         |         |         |                                      |           |        |      |      |
|---------|---------|---------|--------------------------------------|-----------|--------|------|------|
| 6526836 | 7337314 | 1712894 | hypothetical protein LOC691572       | LOC691572 | 691572 | 1,05 | up   |
| 6555111 | 7337314 | 1712895 | hypothetical protein LOC691572       | LOC691572 | 691572 | 1,01 | down |
| 6569180 | 7337314 | 1712896 | hypothetical protein LOC691572       | LOC691572 | 691572 | 2,18 | down |
| 6594560 | 7337314 | 1712890 | hypothetical protein LOC691572       | LOC691572 | 691572 | 1,42 | down |
| 5852425 | 7370128 | 1796167 | hypothetical protein LOC691783       | LOC691783 | 691783 | 2,27 | up   |
| 5773474 | 7076940 | 1073085 | immunity-related GTPase family, M    | Irgm      | 303090 | 3,73 | down |
| 5941862 | 7076940 | 1073085 | immunity-related GTPase family, M    | Irgm      | 303090 | 1,05 | down |
| 6167148 | 7076940 | 1073086 | immunity-related GTPase family, M    | Irgm      | 303090 | 1,07 | up   |
| 6366602 | 7076940 | 1073085 | immunity-related GTPase family, M    | Irgm      | 303090 | 1,41 | up   |
| 6412491 | 7076940 | 1073086 | immunity-related GTPase family, M    | Irgm      | 303090 | 1,06 | down |
| 6517101 | 7076940 | 1073087 | immunity-related GTPase family, M    | Irgm      | 303090 | 1,64 | down |
| 5689215 | 7059319 | 1029966 | immunoglobulin mu binding protein 2  | Ighmbp2   | 29532  | 1,05 | up   |
| 5751566 | 7059319 | 1029968 | immunoglobulin mu binding protein 2  | Ighmbp2   | 29532  | 1,14 | up   |
| 5759146 | 7059319 | 1029972 | immunoglobulin mu binding protein 2  | Ighmbp2   | 29532  | 1,56 | down |
| 5852743 | 7059319 | 1029969 | immunoglobulin mu binding protein 2  | Ighmbp2   | 29532  | 1,22 | down |
| 5876576 | 7059319 | 1029966 | immunoglobulin mu binding protein 2  | Ighmbp2   | 29532  | 1,61 | down |
| 5944478 | 7059319 | 1029970 | immunoglobulin mu binding protein 2  | Ighmbp2   | 29532  | 2,05 | up   |
| 6074410 | 7059319 | 1029975 | immunoglobulin mu binding protein 2  | Ighmbp2   | 29532  | 1,04 | up   |
| 6174935 | 7059319 | 1029977 | immunoglobulin mu binding protein 2  | Ighmbp2   | 29532  | 1,08 | down |
| 6191553 | 7059319 | 1029976 | immunoglobulin mu binding protein 2  | Ighmbp2   | 29532  | 1,51 | down |
| 6222383 | 7059319 | 1029971 | immunoglobulin mu binding protein 2  | Ighmbp2   | 29532  | 1,09 | down |
| 6227409 | 7059319 | 1029967 | immunoglobulin mu binding protein 2  | Ighmbp2   | 29532  | 1,27 | down |
| 6498614 | 7059319 | 1029978 | immunoglobulin mu binding protein 2  | Ighmbp2   | 29532  | 1,32 | up   |
| 6563536 | 7059319 | 1029974 | immunoglobulin mu binding protein 2  | Ighmbp2   | 29532  | 1,65 | down |
| 6578687 | 7059319 | 1029973 | immunoglobulin mu binding protein 2  | Ighmbp2   | 29532  | 1,16 | down |
| 6629391 | 7059319 | 1029964 | immunoglobulin mu binding protein 2  | Ighmbp2   | 29532  | 1,27 | up   |
| 6636945 | 7059319 | 1029965 | immunoglobulin mu binding protein 2  | Ighmbp2   | 29532  | 1,41 | up   |
| 6704659 | 7059319 | 1029966 | immunoglobulin mu binding protein 2  | Ighmbp2   | 29532  | 1,82 | down |
| 5653796 | 7384127 | 1829639 | immunoglobulin superfamily, member 1 | Igsf1     | 302822 | 1,22 | down |
| 5670119 | 7384127 | 1829638 | immunoglobulin superfamily, member 1 | Igsf1     | 302822 | 1,34 | down |
| 5685235 | 7384127 | 1829633 | immunoglobulin superfamily, member 1 | Igsf1     | 302822 | 1,17 | down |
| 5705542 | 7384127 | 1829636 | immunoglobulin superfamily, member 1 | Igsf1     | 302822 | 1,11 | up   |
| 5714535 | 7384127 | 1829639 | immunoglobulin superfamily, member 1 | Igsf1     | 302822 | 1,41 | down |
| 5728022 | 7384127 | 1829637 | immunoglobulin superfamily, member 1 | Igsf1     | 302822 | 1,02 | down |
| 5782451 | 7384127 | 1829626 | immunoglobulin superfamily, member 1 | Igsf1     | 302822 | 1,37 | down |
| 5815698 | 7384127 | 1829628 | immunoglobulin superfamily, member 1 | Igsf1     | 302822 | 1,16 | up   |
| 5856538 | 7384127 | 1829637 | immunoglobulin superfamily, member 1 | Igsf1     | 302822 | 1,11 | down |
| 5926052 | 7384127 | 1829625 | immunoglobulin superfamily, member 1 | Igsf1     | 302822 | 1,13 | up   |
| 5942764 | 7384127 | 1829624 | immunoglobulin superfamily, member 1 | Igsf1     | 302822 | 1,05 | up   |
| 6099488 | 7384127 | 1829624 | immunoglobulin superfamily, member 1 | Igsf1     | 302822 | 1,26 | down |
| 6110422 | 7384127 | 1829632 | immunoglobulin superfamily, member 1 | Igsf1     | 302822 | 1,04 | up   |
| 6267905 | 7384127 | 1829631 | immunoglobulin superfamily, member 1 | Igsf1     | 302822 | 1,20 | up   |
| 6269235 | 7384127 | 1829629 | immunoglobulin superfamily, member 1 | Igsf1     | 302822 | 1,16 | down |
| 6298965 | 7384127 | 1829636 | immunoglobulin superfamily, member 1 | Igsf1     | 302822 | 1,13 | down |
| 6312148 | 7384127 | 1829635 | immunoglobulin superfamily, member 1 | Igsf1     | 302822 | 1,51 | down |
| 6346071 | 7384127 | 1829640 | immunoglobulin superfamily, member 1 | Igsf1     | 302822 | 1,02 | up   |
| 6429075 | 7384127 | 1829621 | immunoglobulin superfamily, member 1 | Igsf1     | 302822 | 2,24 | down |
| 6451918 | 7384127 | 1829634 | immunoglobulin superfamily, member 1 | Igsf1     | 302822 | 1,24 | up   |
| 6547217 | 7384127 | 1829636 | immunoglobulin superfamily, member 1 | Igsf1     | 302822 | 1,10 | down |
| 6562241 | 7384127 | 1829627 | immunoglobulin superfamily, member 1 | Igsf1     | 302822 | 1,73 | up   |
| 6623212 | 7384127 | 1829620 | immunoglobulin superfamily, member 1 | Igsf1     | 302822 | 1,01 | down |
| 6651256 | 7384127 | 1829623 | immunoglobulin superfamily, member 1 | Igsf1     | 302822 | 2,05 | up   |
| 6691890 | 7384127 | 1829632 | immunoglobulin superfamily, member 1 | Igsf1     | 302822 | 1,24 | down |
| 6704433 | 7384127 | 1829630 | immunoglobulin superfamily, member 1 | Igsf1     | 302822 | 1,30 | up   |
| 6705760 | 7384127 | 1829622 | immunoglobulin superfamily, member 1 | Igsf1     | 302822 | 1,09 | up   |
| 5718266 | 7107926 | 1146838 | immunoglobulin superfamily, member 9 | Igsf9     | 304982 | 1,11 | up   |

|         |         |         |                                                                  |        |        |      |      |
|---------|---------|---------|------------------------------------------------------------------|--------|--------|------|------|
| 5758470 | 7107926 | 1146834 | immunoglobulin superfamily, member 9                             | Igsf9  | 304982 | 1,59 | up   |
| 5818250 | 7107926 | 1146846 | immunoglobulin superfamily, member 9                             | Igsf9  | 304982 | 1,09 | up   |
| 5839873 | 7107926 | 1146845 | immunoglobulin superfamily, member 9                             | Igsf9  | 304982 | 1,36 | up   |
| 5856756 | 7107926 | 1146848 | immunoglobulin superfamily, member 9                             | Igsf9  | 304982 | 1,12 | up   |
| 5887547 | 7107926 | 1146848 | immunoglobulin superfamily, member 9                             | Igsf9  | 304982 | 1,08 | up   |
| 5892087 | 7107926 | 1146842 | immunoglobulin superfamily, member 9                             | Igsf9  | 304982 | 1,13 | up   |
| 5932612 | 7107926 | 1146832 | immunoglobulin superfamily, member 9                             | Igsf9  | 304982 | 1,51 | up   |
| 5952971 | 7107926 | 1146852 | immunoglobulin superfamily, member 9                             | Igsf9  | 304982 | 1,22 | down |
| 6039458 | 7107926 | 1146828 | immunoglobulin superfamily, member 9                             | Igsf9  | 304982 | 1,11 | down |
| 6049094 | 7107926 | 1146833 | immunoglobulin superfamily, member 9                             | Igsf9  | 304982 | 1,17 | up   |
| 6049389 | 7107926 | 1146831 | immunoglobulin superfamily, member 9                             | Igsf9  | 304982 | 1,78 | up   |
| 6062239 | 7107926 | 1146828 | immunoglobulin superfamily, member 9                             | Igsf9  | 304982 | 1,09 | up   |
| 6101940 | 7107926 | 1146848 | immunoglobulin superfamily, member 9                             | Igsf9  | 304982 | 1,91 | up   |
| 6225666 | 7107926 | 1146845 | immunoglobulin superfamily, member 9                             | Igsf9  | 304982 | 1,23 | up   |
| 6410743 | 7107926 | 1146836 | immunoglobulin superfamily, member 9                             | Igsf9  | 304982 | 1,63 | down |
| 6442059 | 7107926 | 1146835 | immunoglobulin superfamily, member 9                             | Igsf9  | 304982 | 1,21 | down |
| 6467535 | 7107926 | 1146847 | immunoglobulin superfamily, member 9                             | Igsf9  | 304982 | 2,97 | down |
| 6477925 | 7107926 | 1146844 | immunoglobulin superfamily, member 9                             | Igsf9  | 304982 | 1,15 | up   |
| 6526672 | 7107926 | 1146845 | immunoglobulin superfamily, member 9                             | Igsf9  | 304982 | 1,11 | down |
| 6539944 | 7107926 | 1146827 | immunoglobulin superfamily, member 9                             | Igsf9  | 304982 | 1,06 | down |
| 6543024 | 7107926 | 1146826 | immunoglobulin superfamily, member 9                             | Igsf9  | 304982 | 1,23 | up   |
| 6553557 | 7107926 | 1146843 | immunoglobulin superfamily, member 9                             | Igsf9  | 304982 | 1,01 | down |
| 6563890 | 7107926 | 1146849 | immunoglobulin superfamily, member 9                             | Igsf9  | 304982 | 2,96 | down |
| 6615327 | 7107926 | 1146851 | immunoglobulin superfamily, member 9                             | Igsf9  | 304982 | 1,03 | up   |
| 6651768 | 7107926 | 1146827 | immunoglobulin superfamily, member 9                             | Igsf9  | 304982 | 1,30 | up   |
| 6703683 | 7107926 | 1146841 | immunoglobulin superfamily, member 9                             | Igsf9  | 304982 | 1,04 | down |
| 5686999 | 7111573 | 1156013 | immunoglobulin-like and fibronectin type III domain containing 1 | Igfn1  | 304823 | 1,03 | down |
| 5704934 | 7134773 | 1212971 | immunoresponsive 1 homolog (mouse)                               | Irg1   | 306127 | 1,67 | up   |
| 5766432 | 7134773 | 1212970 | immunoresponsive 1 homolog (mouse)                               | Irg1   | 306127 | 1,70 | up   |
| 6329446 | 7134773 | 1212971 | immunoresponsive 1 homolog (mouse)                               | Irg1   | 306127 | 1,12 | up   |
| 6457330 | 7134773 | 1212966 | immunoresponsive 1 homolog (mouse)                               | Irg1   | 306127 | 6,18 | down |
| 6472315 | 7134773 | 1212972 | immunoresponsive 1 homolog (mouse)                               | Irg1   | 306127 | 1,29 | up   |
| 6618291 | 7134773 | 1212968 | immunoresponsive 1 homolog (mouse)                               | Irg1   | 306127 | 1,13 | up   |
| 6700427 | 7134773 | 1212969 | immunoresponsive 1 homolog (mouse)                               | Irg1   | 306127 | 2,41 | up   |
| 5877868 | 7146975 | 1243268 | indoleamine-pyrrole 2,3 dioxygenase                              | Indo   | 66029  | 2,56 | up   |
| 6005325 | 7146975 | 1243265 | indoleamine-pyrrole 2,3 dioxygenase                              | Indo   | 66029  | 1,24 | up   |
| 6257329 | 7146975 | 1243264 | indoleamine-pyrrole 2,3 dioxygenase                              | Indo   | 66029  | 1,62 | down |
| 6388956 | 7146975 | 1243266 | indoleamine-pyrrole 2,3 dioxygenase                              | Indo   | 66029  | 1,79 | up   |
| 6399413 | 7146975 | 1243267 | indoleamine-pyrrole 2,3 dioxygenase                              | Indo   | 66029  | 2,00 | up   |
| 6412126 | 7146975 | 1243269 | indoleamine-pyrrole 2,3 dioxygenase                              | Indo   | 66029  | 1,61 | down |
| 6466360 | 7146975 | 1243262 | indoleamine-pyrrole 2,3 dioxygenase                              | Indo   | 66029  | 6,29 | down |
| 6499144 | 7146975 | 1243269 | indoleamine-pyrrole 2,3 dioxygenase                              | Indo   | 66029  | 1,49 | up   |
| 6509872 | 7146975 | 1243263 | indoleamine-pyrrole 2,3 dioxygenase                              | Indo   | 66029  | 1,16 | up   |
| 6689139 | 7146975 | 1243262 | indoleamine-pyrrole 2,3 dioxygenase                              | Indo   | 66029  | 2,93 | down |
| 6692536 | 7146982 | 1243293 | indoleamine-pyrrole 2,3 dioxygenase-like 1                       | Indol1 | 681319 | 2,64 | up   |
| 5787418 | 7251608 | 1501451 | inhibitor of growth family, member 3                             | Ing3   | 312154 | 1,14 | up   |
| 5814696 | 7251608 | 1501466 | inhibitor of growth family, member 3                             | Ing3   | 312154 | 1,21 | down |
| 5967777 | 7251608 | 1501452 | inhibitor of growth family, member 3                             | Ing3   | 312154 | 1,20 | up   |
| 5984469 | 7251608 | 1501464 | inhibitor of growth family, member 3                             | Ing3   | 312154 | 1,14 | down |
| 5995520 | 7251608 | 1501450 | inhibitor of growth family, member 3                             | Ing3   | 312154 | 1,44 | up   |
| 6055558 | 7251608 | 1501460 | inhibitor of growth family, member 3                             | Ing3   | 312154 | 1,29 | up   |
| 6066419 | 7251608 | 1501463 | inhibitor of growth family, member 3                             | Ing3   | 312154 | 1,15 | down |
| 6306919 | 7251608 | 1501465 | inhibitor of growth family, member 3                             | Ing3   | 312154 | 1,28 | up   |
| 6359804 | 7251608 | 1501462 | inhibitor of growth family, member 3                             | Ing3   | 312154 | 1,18 | down |
| 6370009 | 7251608 | 1501461 | inhibitor of growth family, member 3                             | Ing3   | 312154 | 1,12 | down |
| 6518685 | 7251608 | 1501463 | inhibitor of growth family, member 3                             | Ing3   | 312154 | 1,15 | up   |

|         |         |         |                                              |        |        |      |      |
|---------|---------|---------|----------------------------------------------|--------|--------|------|------|
| 6647816 | 7251608 | 1501462 | inhibitor of growth family, member 3         | Ing3   | 312154 | 1,52 | down |
| 6660973 | 7251608 | 1501459 | inhibitor of growth family, member 3         | Ing3   | 312154 | 1,24 | down |
| 6670018 | 7251608 | 1501463 | inhibitor of growth family, member 3         | Ing3   | 312154 | 1,18 | down |
| 6691457 | 7251608 | 1501453 | inhibitor of growth family, member 3         | Ing3   | 312154 | 1,22 | up   |
| 6718411 | 7251608 | 1501454 | inhibitor of growth family, member 3         | Ing3   | 312154 | 1,91 | down |
| 6737472 | 7251608 | 1501459 | inhibitor of growth family, member 3         | Ing3   | 312154 | 1,18 | down |
| 5643499 | 7060246 | 1032088 | inner centromere protein                     | Incenp | 293733 | 1,06 | up   |
| 5656987 | 7060246 | 1032084 | inner centromere protein                     | Incenp | 293733 | 1,17 | down |
| 5724972 | 7060246 | 1032079 | inner centromere protein                     | Incenp | 293733 | 1,15 | down |
| 5738178 | 7060246 | 1032088 | inner centromere protein                     | Incenp | 293733 | 1,46 | up   |
| 5763806 | 7060246 | 1032087 | inner centromere protein                     | Incenp | 293733 | 1,00 | up   |
| 5864168 | 7060246 | 1032089 | inner centromere protein                     | Incenp | 293733 | 1,69 | up   |
| 5893558 | 7060246 | 1032078 | inner centromere protein                     | Incenp | 293733 | 1,32 | down |
| 5901271 | 7060246 | 1032086 | inner centromere protein                     | Incenp | 293733 | 1,60 | down |
| 6026550 | 7060246 | 1032078 | inner centromere protein                     | Incenp | 293733 | 1,59 | down |
| 6048139 | 7060246 | 1032080 | inner centromere protein                     | Incenp | 293733 | 1,85 | down |
| 6104808 | 7060246 | 1032076 | inner centromere protein                     | Incenp | 293733 | 1,46 | up   |
| 6151417 | 7060246 | 1032088 | inner centromere protein                     | Incenp | 293733 | 1,40 | up   |
| 6261377 | 7060246 | 1032091 | inner centromere protein                     | Incenp | 293733 | 1,39 | up   |
| 6297341 | 7060246 | 1032076 | inner centromere protein                     | Incenp | 293733 | 1,60 | down |
| 6303470 | 7060246 | 1032083 | inner centromere protein                     | Incenp | 293733 | 1,09 | down |
| 6341431 | 7060246 | 1032081 | inner centromere protein                     | Incenp | 293733 | 1,16 | down |
| 6416343 | 7060246 | 1032090 | inner centromere protein                     | Incenp | 293733 | 1,10 | down |
| 6448627 | 7060246 | 1032082 | inner centromere protein                     | Incenp | 293733 | 1,06 | down |
| 6493833 | 7060246 | 1032074 | inner centromere protein                     | Incenp | 293733 | 1,27 | down |
| 6572851 | 7060246 | 1032088 | inner centromere protein                     | Incenp | 293733 | 1,18 | up   |
| 6610816 | 7060246 | 1032077 | inner centromere protein                     | Incenp | 293733 | 1,77 | down |
| 6614480 | 7060246 | 1032075 | inner centromere protein                     | Incenp | 293733 | 2,62 | up   |
| 6654471 | 7060246 | 1032074 | inner centromere protein                     | Incenp | 293733 | 1,03 | down |
| 6738131 | 7060246 | 1032085 | inner centromere protein                     | Incenp | 293733 | 1,36 | down |
| 6187297 | 7243603 | 1482255 | INO80 homolog (S. cerevisiae)                | Ino80  | 296084 | 1,32 | down |
| 6252424 | 7243603 | 1482255 | INO80 homolog (S. cerevisiae)                | Ino80  | 296084 | 1,22 | down |
| 5621761 | 7257111 | 1515522 | inositol 1,4,5-triphosphate receptor, type 1 | Itpr1  | 25262  | 1,25 | up   |
| 5622746 | 7257111 | 1515524 | inositol 1,4,5-triphosphate receptor, type 1 | Itpr1  | 25262  | 1,05 | up   |
| 5635653 | 7257111 | 1515497 | inositol 1,4,5-triphosphate receptor, type 1 | Itpr1  | 25262  | 1,10 | up   |
| 5669637 | 7257111 | 1515532 | inositol 1,4,5-triphosphate receptor, type 1 | Itpr1  | 25262  | 1,11 | up   |
| 5674601 | 7257111 | 1515527 | inositol 1,4,5-triphosphate receptor, type 1 | Itpr1  | 25262  | 1,19 | up   |
| 5674985 | 7257111 | 1515534 | inositol 1,4,5-triphosphate receptor, type 1 | Itpr1  | 25262  | 1,20 | down |
| 5698991 | 7257111 | 1515530 | inositol 1,4,5-triphosphate receptor, type 1 | Itpr1  | 25262  | 1,13 | up   |
| 5715918 | 7257111 | 1515533 | inositol 1,4,5-triphosphate receptor, type 1 | Itpr1  | 25262  | 1,09 | up   |
| 5721609 | 7257111 | 1515490 | inositol 1,4,5-triphosphate receptor, type 1 | Itpr1  | 25262  | 1,13 | up   |
| 5752521 | 7257111 | 1515495 | inositol 1,4,5-triphosphate receptor, type 1 | Itpr1  | 25262  | 1,15 | down |
| 5754535 | 7257111 | 1515523 | inositol 1,4,5-triphosphate receptor, type 1 | Itpr1  | 25262  | 1,06 | up   |
| 5773911 | 7257111 | 1515509 | inositol 1,4,5-triphosphate receptor, type 1 | Itpr1  | 25262  | 1,11 | up   |
| 5790799 | 7257111 | 1515535 | inositol 1,4,5-triphosphate receptor, type 1 | Itpr1  | 25262  | 1,03 | down |
| 5797315 | 7257111 | 1515506 | inositol 1,4,5-triphosphate receptor, type 1 | Itpr1  | 25262  | 1,09 | up   |
| 5831482 | 7257111 | 1515510 | inositol 1,4,5-triphosphate receptor, type 1 | Itpr1  | 25262  | 1,15 | up   |
| 5849054 | 7257111 | 1515516 | inositol 1,4,5-triphosphate receptor, type 1 | Itpr1  | 25262  | 1,54 | up   |
| 5854545 | 7257111 | 1515507 | inositol 1,4,5-triphosphate receptor, type 1 | Itpr1  | 25262  | 1,08 | up   |
| 5901853 | 7257111 | 1515526 | inositol 1,4,5-triphosphate receptor, type 1 | Itpr1  | 25262  | 1,33 | down |
| 5922338 | 7257111 | 1515545 | inositol 1,4,5-triphosphate receptor, type 1 | Itpr1  | 25262  | 1,37 | down |
| 5926800 | 7257111 | 1515491 | inositol 1,4,5-triphosphate receptor, type 1 | Itpr1  | 25262  | 1,24 | down |
| 5927635 | 7257111 | 1515548 | inositol 1,4,5-triphosphate receptor, type 1 | Itpr1  | 25262  | 1,14 | up   |
| 5977239 | 7257111 | 1515511 | inositol 1,4,5-triphosphate receptor, type 1 | Itpr1  | 25262  | 2,34 | up   |
| 6045014 | 7257111 | 1515520 | inositol 1,4,5-triphosphate receptor, type 1 | Itpr1  | 25262  | 1,39 | up   |
| 6074957 | 7257111 | 1515529 | inositol 1,4,5-triphosphate receptor, type 1 | Itpr1  | 25262  | 1,31 | up   |

|         |         |         |                                              |        |       |      |      |
|---------|---------|---------|----------------------------------------------|--------|-------|------|------|
| 6094254 | 7257111 | 1515501 | inositol 1,4,5-triphosphate receptor, type 1 | Itpr1  | 25262 | 1,19 | up   |
| 6103199 | 7257111 | 1515547 | inositol 1,4,5-triphosphate receptor, type 1 | Itpr1  | 25262 | 1,03 | up   |
| 6103316 | 7257111 | 1515499 | inositol 1,4,5-triphosphate receptor, type 1 | Itpr1  | 25262 | 1,08 | up   |
| 6143805 | 7257111 | 1515536 | inositol 1,4,5-triphosphate receptor, type 1 | Itpr1  | 25262 | 1,10 | up   |
| 6177602 | 7257111 | 1515546 | inositol 1,4,5-triphosphate receptor, type 1 | Itpr1  | 25262 | 1,28 | down |
| 6198081 | 7257111 | 1515500 | inositol 1,4,5-triphosphate receptor, type 1 | Itpr1  | 25262 | 1,33 | down |
| 6220629 | 7257111 | 1515494 | inositol 1,4,5-triphosphate receptor, type 1 | Itpr1  | 25262 | 1,15 | up   |
| 6245599 | 7257111 | 1515519 | inositol 1,4,5-triphosphate receptor, type 1 | Itpr1  | 25262 | 1,17 | down |
| 6263737 | 7257111 | 1515502 | inositol 1,4,5-triphosphate receptor, type 1 | Itpr1  | 25262 | 1,07 | down |
| 6268596 | 7257111 | 1515539 | inositol 1,4,5-triphosphate receptor, type 1 | Itpr1  | 25262 | 1,00 | up   |
| 6271541 | 7257111 | 1515498 | inositol 1,4,5-triphosphate receptor, type 1 | Itpr1  | 25262 | 1,37 | up   |
| 6302882 | 7257111 | 1515487 | inositol 1,4,5-triphosphate receptor, type 1 | Itpr1  | 25262 | 1,02 | up   |
| 6307582 | 7257111 | 1515488 | inositol 1,4,5-triphosphate receptor, type 1 | Itpr1  | 25262 | 1,20 | down |
| 6320808 | 7257111 | 1515510 | inositol 1,4,5-triphosphate receptor, type 1 | Itpr1  | 25262 | 1,62 | down |
| 6329852 | 7257111 | 1515512 | inositol 1,4,5-triphosphate receptor, type 1 | Itpr1  | 25262 | 1,14 | down |
| 6349109 | 7257111 | 1515505 | inositol 1,4,5-triphosphate receptor, type 1 | Itpr1  | 25262 | 1,05 | up   |
| 6352721 | 7257111 | 1515538 | inositol 1,4,5-triphosphate receptor, type 1 | Itpr1  | 25262 | 1,19 | up   |
| 6355736 | 7257111 | 1515492 | inositol 1,4,5-triphosphate receptor, type 1 | Itpr1  | 25262 | 1,91 | down |
| 6356471 | 7257111 | 1515542 | inositol 1,4,5-triphosphate receptor, type 1 | Itpr1  | 25262 | 1,22 | down |
| 6368535 | 7257111 | 1515504 | inositol 1,4,5-triphosphate receptor, type 1 | Itpr1  | 25262 | 1,08 | down |
| 6384137 | 7257111 | 1515543 | inositol 1,4,5-triphosphate receptor, type 1 | Itpr1  | 25262 | 1,03 | up   |
| 6391607 | 7257111 | 1515521 | inositol 1,4,5-triphosphate receptor, type 1 | Itpr1  | 25262 | 1,09 | down |
| 6446710 | 7257111 | 1515524 | inositol 1,4,5-triphosphate receptor, type 1 | Itpr1  | 25262 | 1,05 | down |
| 6451332 | 7257111 | 1515528 | inositol 1,4,5-triphosphate receptor, type 1 | Itpr1  | 25262 | 1,52 | up   |
| 6454192 | 7257111 | 1515518 | inositol 1,4,5-triphosphate receptor, type 1 | Itpr1  | 25262 | 1,33 | down |
| 6457839 | 7257111 | 1515531 | inositol 1,4,5-triphosphate receptor, type 1 | Itpr1  | 25262 | 1,08 | down |
| 6479290 | 7257111 | 1515538 | inositol 1,4,5-triphosphate receptor, type 1 | Itpr1  | 25262 | 1,11 | down |
| 6529672 | 7257111 | 1515534 | inositol 1,4,5-triphosphate receptor, type 1 | Itpr1  | 25262 | 1,37 | up   |
| 6578976 | 7257111 | 1515541 | inositol 1,4,5-triphosphate receptor, type 1 | Itpr1  | 25262 | 1,18 | down |
| 6597522 | 7257111 | 1515544 | inositol 1,4,5-triphosphate receptor, type 1 | Itpr1  | 25262 | 1,10 | up   |
| 6606770 | 7257111 | 1515513 | inositol 1,4,5-triphosphate receptor, type 1 | Itpr1  | 25262 | 1,69 | up   |
| 6613603 | 7257111 | 1515515 | inositol 1,4,5-triphosphate receptor, type 1 | Itpr1  | 25262 | 1,25 | up   |
| 6640128 | 7257111 | 1515540 | inositol 1,4,5-triphosphate receptor, type 1 | Itpr1  | 25262 | 1,37 | down |
| 6654084 | 7257111 | 1515496 | inositol 1,4,5-triphosphate receptor, type 1 | Itpr1  | 25262 | 1,38 | down |
| 6654695 | 7257111 | 1515514 | inositol 1,4,5-triphosphate receptor, type 1 | Itpr1  | 25262 | 1,07 | up   |
| 6664457 | 7257111 | 1515493 | inositol 1,4,5-triphosphate receptor, type 1 | Itpr1  | 25262 | 1,37 | down |
| 6669912 | 7257111 | 1515537 | inositol 1,4,5-triphosphate receptor, type 1 | Itpr1  | 25262 | 1,23 | down |
| 6699950 | 7257111 | 1515489 | inositol 1,4,5-triphosphate receptor, type 1 | Itpr1  | 25262 | 1,30 | down |
| 6702570 | 7257111 | 1515503 | inositol 1,4,5-triphosphate receptor, type 1 | Itpr1  | 25262 | 1,26 | up   |
| 6715032 | 7257111 | 1515508 | inositol 1,4,5-triphosphate receptor, type 1 | Itpr1  | 25262 | 1,46 | up   |
| 6735410 | 7257111 | 1515525 | inositol 1,4,5-triphosphate receptor, type 1 | Itpr1  | 25262 | 1,20 | down |
| 6741995 | 7257111 | 1515517 | inositol 1,4,5-triphosphate receptor, type 1 | Itpr1  | 25262 | 1,01 | down |
| 5631412 | 7353536 | 1753545 | inositol polyphosphate-4-phosphatase, type 1 | Inpp4a | 80849 | 1,03 | up   |
| 5642643 | 7353536 | 1753546 | inositol polyphosphate-4-phosphatase, type 1 | Inpp4a | 80849 | 1,47 | up   |
| 5683542 | 7353536 | 1753561 | inositol polyphosphate-4-phosphatase, type 1 | Inpp4a | 80849 | 1,25 | up   |
| 5757220 | 7353536 | 1753552 | inositol polyphosphate-4-phosphatase, type 1 | Inpp4a | 80849 | 1,05 | up   |
| 5765914 | 7353536 | 1753570 | inositol polyphosphate-4-phosphatase, type 1 | Inpp4a | 80849 | 1,21 | up   |
| 5797915 | 7353536 | 1753567 | inositol polyphosphate-4-phosphatase, type 1 | Inpp4a | 80849 | 1,56 | up   |
| 5842595 | 7353536 | 1753566 | inositol polyphosphate-4-phosphatase, type 1 | Inpp4a | 80849 | 1,79 | down |
| 5921541 | 7353536 | 1753550 | inositol polyphosphate-4-phosphatase, type 1 | Inpp4a | 80849 | 1,19 | up   |
| 5984721 | 7353536 | 1753554 | inositol polyphosphate-4-phosphatase, type 1 | Inpp4a | 80849 | 1,21 | up   |
| 6010550 | 7353536 | 1753559 | inositol polyphosphate-4-phosphatase, type 1 | Inpp4a | 80849 | 1,05 | down |
| 6030648 | 7353536 | 1753560 | inositol polyphosphate-4-phosphatase, type 1 | Inpp4a | 80849 | 2,50 | up   |
| 6044803 | 7353536 | 1753544 | inositol polyphosphate-4-phosphatase, type 1 | Inpp4a | 80849 | 1,02 | up   |
| 6066590 | 7353536 | 1753563 | inositol polyphosphate-4-phosphatase, type 1 | Inpp4a | 80849 | 1,15 | up   |
| 6070009 | 7353536 | 1753546 | inositol polyphosphate-4-phosphatase, type 1 | Inpp4a | 80849 | 1,45 | down |

|         |         |         |                                              |        |        |      |      |
|---------|---------|---------|----------------------------------------------|--------|--------|------|------|
| 6114877 | 7353536 | 1753556 | inositol polyphosphate-4-phosphatase, type 1 | Inpp4a | 80849  | 1,15 | down |
| 6176194 | 7353536 | 1753548 | inositol polyphosphate-4-phosphatase, type 1 | Inpp4a | 80849  | 1,30 | up   |
| 6196127 | 7353536 | 1753564 | inositol polyphosphate-4-phosphatase, type 1 | Inpp4a | 80849  | 1,10 | up   |
| 6198756 | 7353536 | 1753553 | inositol polyphosphate-4-phosphatase, type 1 | Inpp4a | 80849  | 1,38 | down |
| 6200670 | 7353536 | 1753557 | inositol polyphosphate-4-phosphatase, type 1 | Inpp4a | 80849  | 1,36 | up   |
| 6212012 | 7353536 | 1753546 | inositol polyphosphate-4-phosphatase, type 1 | Inpp4a | 80849  | 1,09 | down |
| 6280630 | 7353536 | 1753555 | inositol polyphosphate-4-phosphatase, type 1 | Inpp4a | 80849  | 1,03 | down |
| 6317641 | 7353536 | 1753549 | inositol polyphosphate-4-phosphatase, type 1 | Inpp4a | 80849  | 1,27 | up   |
| 6319347 | 7353536 | 1753565 | inositol polyphosphate-4-phosphatase, type 1 | Inpp4a | 80849  | 1,00 | up   |
| 6412415 | 7353536 | 1753551 | inositol polyphosphate-4-phosphatase, type 1 | Inpp4a | 80849  | 1,02 | up   |
| 6456274 | 7353536 | 1753568 | inositol polyphosphate-4-phosphatase, type 1 | Inpp4a | 80849  | 1,20 | down |
| 6510096 | 7353536 | 1753558 | inositol polyphosphate-4-phosphatase, type 1 | Inpp4a | 80849  | 1,05 | down |
| 6546052 | 7353536 | 1753562 | inositol polyphosphate-4-phosphatase, type 1 | Inpp4a | 80849  | 1,11 | up   |
| 6576615 | 7353536 | 1753569 | inositol polyphosphate-4-phosphatase, type 1 | Inpp4a | 80849  | 1,33 | down |
| 6580388 | 7353536 | 1753547 | inositol polyphosphate-4-phosphatase, type 1 | Inpp4a | 80849  | 1,24 | up   |
| 6596085 | 7353536 | 1753548 | inositol polyphosphate-4-phosphatase, type 1 | Inpp4a | 80849  | 1,16 | up   |
| 6450950 | 7374143 | 1807010 | insulin receptor substrate 4                 | Irs4   | 315350 | 1,41 | up   |
| 5691261 | 7120834 | 1179364 | insulin-like growth factor binding protein 1 | Igfbp1 | 25685  | 1,04 | up   |
| 5847621 | 7120834 | 1179362 | insulin-like growth factor binding protein 1 | Igfbp1 | 25685  | 2,56 | down |
| 5929530 | 7120834 | 1179361 | insulin-like growth factor binding protein 1 | Igfbp1 | 25685  | 1,39 | up   |
| 6181944 | 7120834 | 1179360 | insulin-like growth factor binding protein 1 | Igfbp1 | 25685  | 1,01 | down |
| 6237947 | 7120834 | 1179363 | insulin-like growth factor binding protein 1 | Igfbp1 | 25685  | 1,17 | down |
| 6411183 | 7120834 | 1179360 | insulin-like growth factor binding protein 1 | Igfbp1 | 25685  | 1,07 | down |
| 5618545 | 7034353 | 972144  | integrator complex subunit 4                 | Ints4  | 308837 | 1,03 | up   |
| 5625708 | 7034353 | 972135  | integrator complex subunit 4                 | Ints4  | 308837 | 1,05 | up   |
| 5627786 | 7034353 | 972125  | integrator complex subunit 4                 | Ints4  | 308837 | 1,01 | up   |
| 5662481 | 7034353 | 972123  | integrator complex subunit 4                 | Ints4  | 308837 | 1,07 | down |
| 5708642 | 7034353 | 972130  | integrator complex subunit 4                 | Ints4  | 308837 | 1,07 | up   |
| 5779717 | 7034353 | 972147  | integrator complex subunit 4                 | Ints4  | 308837 | 1,26 | down |
| 5792255 | 7034353 | 972147  | integrator complex subunit 4                 | Ints4  | 308837 | 1,55 | down |
| 5838849 | 7034353 | 972132  | integrator complex subunit 4                 | Ints4  | 308837 | 1,04 | down |
| 6083574 | 7034353 | 972124  | integrator complex subunit 4                 | Ints4  | 308837 | 1,01 | down |
| 6117269 | 7034353 | 972133  | integrator complex subunit 4                 | Ints4  | 308837 | 1,07 | up   |
| 6126466 | 7034353 | 972136  | integrator complex subunit 4                 | Ints4  | 308837 | 1,08 | down |
| 6130931 | 7034353 | 972145  | integrator complex subunit 4                 | Ints4  | 308837 | 1,04 | up   |
| 6176211 | 7034353 | 972143  | integrator complex subunit 4                 | Ints4  | 308837 | 2,49 | down |
| 6200653 | 7034353 | 972146  | integrator complex subunit 4                 | Ints4  | 308837 | 1,11 | down |
| 6237460 | 7034353 | 972134  | integrator complex subunit 4                 | Ints4  | 308837 | 1,35 | down |
| 6246787 | 7034353 | 972129  | integrator complex subunit 4                 | Ints4  | 308837 | 1,05 | down |
| 6268726 | 7034353 | 972131  | integrator complex subunit 4                 | Ints4  | 308837 | 1,09 | up   |
| 6281347 | 7034353 | 972147  | integrator complex subunit 4                 | Ints4  | 308837 | 1,01 | down |
| 6318069 | 7034353 | 972126  | integrator complex subunit 4                 | Ints4  | 308837 | 1,15 | up   |
| 6433456 | 7034353 | 972140  | integrator complex subunit 4                 | Ints4  | 308837 | 1,09 | up   |
| 6550229 | 7034353 | 972142  | integrator complex subunit 4                 | Ints4  | 308837 | 1,22 | down |
| 6606283 | 7034353 | 972122  | integrator complex subunit 4                 | Ints4  | 308837 | 1,09 | up   |
| 6607072 | 7034353 | 972141  | integrator complex subunit 4                 | Ints4  | 308837 | 1,78 | down |
| 6676464 | 7034353 | 972128  | integrator complex subunit 4                 | Ints4  | 308837 | 1,28 | up   |
| 6700333 | 7034353 | 972137  | integrator complex subunit 4                 | Ints4  | 308837 | 1,22 | down |
| 5789129 | 7139026 | 1223514 | integrator complex subunit 6                 | Ints6  | 361057 | 1,86 | up   |
| 5943286 | 7139026 | 1223520 | integrator complex subunit 6                 | Ints6  | 361057 | 2,30 | up   |
| 6053785 | 7139026 | 1223510 | integrator complex subunit 6                 | Ints6  | 361057 | 1,23 | down |
| 6098652 | 7139026 | 1223509 | integrator complex subunit 6                 | Ints6  | 361057 | 1,36 | up   |
| 6161750 | 7139026 | 1223517 | integrator complex subunit 6                 | Ints6  | 361057 | 1,41 | up   |
| 6264397 | 7139026 | 1223513 | integrator complex subunit 6                 | Ints6  | 361057 | 1,09 | down |
| 6292591 | 7139026 | 1223516 | integrator complex subunit 6                 | Ints6  | 361057 | 1,19 | down |
| 6329945 | 7139026 | 1223514 | integrator complex subunit 6                 | Ints6  | 361057 | 1,11 | up   |

|         |         |         |                              |       |        |      |      |
|---------|---------|---------|------------------------------|-------|--------|------|------|
| 6418461 | 7139026 | 1223514 | integrator complex subunit 6 | Ints6 | 361057 | 1,13 | up   |
| 6652106 | 7139026 | 1223512 | integrator complex subunit 6 | Ints6 | 361057 | 1,65 | down |
| 5705979 | 7311937 | 1651995 | integrin alpha 7             | Itga7 | 81008  | 1,08 | down |
| 5748215 | 7311937 | 1652001 | integrin alpha 7             | Itga7 | 81008  | 1,09 | down |
| 5767798 | 7311937 | 1652011 | integrin alpha 7             | Itga7 | 81008  | 1,01 | down |
| 5771722 | 7311937 | 1651994 | integrin alpha 7             | Itga7 | 81008  | 1,01 | down |
| 5778960 | 7311937 | 1651996 | integrin alpha 7             | Itga7 | 81008  | 1,10 | up   |
| 5875492 | 7311937 | 1652008 | integrin alpha 7             | Itga7 | 81008  | 2,18 | up   |
| 5877289 | 7311937 | 1651992 | integrin alpha 7             | Itga7 | 81008  | 1,02 | up   |
| 5899743 | 7311937 | 1652005 | integrin alpha 7             | Itga7 | 81008  | 1,20 | up   |
| 5936914 | 7311937 | 1651986 | integrin alpha 7             | Itga7 | 81008  | 1,13 | up   |
| 5943041 | 7311937 | 1652010 | integrin alpha 7             | Itga7 | 81008  | 2,00 | down |
| 5972950 | 7311937 | 1652010 | integrin alpha 7             | Itga7 | 81008  | 1,35 | up   |
| 6027122 | 7311937 | 1651985 | integrin alpha 7             | Itga7 | 81008  | 1,14 | up   |
| 6057013 | 7311937 | 1651991 | integrin alpha 7             | Itga7 | 81008  | 1,01 | up   |
| 6091867 | 7311937 | 1652007 | integrin alpha 7             | Itga7 | 81008  | 2,16 | down |
| 6134559 | 7311937 | 1651998 | integrin alpha 7             | Itga7 | 81008  | 1,18 | down |
| 6213788 | 7311937 | 1651997 | integrin alpha 7             | Itga7 | 81008  | 1,75 | up   |
| 6230037 | 7311937 | 1652004 | integrin alpha 7             | Itga7 | 81008  | 1,11 | down |
| 6248388 | 7311937 | 1651985 | integrin alpha 7             | Itga7 | 81008  | 1,06 | down |
| 6314880 | 7311937 | 1652011 | integrin alpha 7             | Itga7 | 81008  | 1,39 | down |
| 6348855 | 7311937 | 1651987 | integrin alpha 7             | Itga7 | 81008  | 1,03 | up   |
| 6466763 | 7311937 | 1651999 | integrin alpha 7             | Itga7 | 81008  | 1,12 | up   |
| 6503812 | 7311937 | 1652006 | integrin alpha 7             | Itga7 | 81008  | 1,07 | up   |
| 6526730 | 7311937 | 1652003 | integrin alpha 7             | Itga7 | 81008  | 1,57 | up   |
| 6562415 | 7311937 | 1651990 | integrin alpha 7             | Itga7 | 81008  | 1,10 | down |
| 6583449 | 7311937 | 1651988 | integrin alpha 7             | Itga7 | 81008  | 1,11 | down |
| 6592260 | 7311937 | 1652009 | integrin alpha 7             | Itga7 | 81008  | 1,15 | up   |
| 6599599 | 7311937 | 1651989 | integrin alpha 7             | Itga7 | 81008  | 1,01 | up   |
| 6602034 | 7311937 | 1651993 | integrin alpha 7             | Itga7 | 81008  | 1,06 | up   |
| 6642392 | 7311937 | 1652000 | integrin alpha 7             | Itga7 | 81008  | 1,02 | down |
| 6650702 | 7311937 | 1652002 | integrin alpha 7             | Itga7 | 81008  | 1,11 | down |
| 5854094 | 7341253 | 1723317 | integrin alpha 9             | Itga9 | 685004 | 1,00 | down |
| 5630721 | 7036975 | 978046  | integrin alpha L             | Itgal | 308995 | 1,12 | up   |
| 5633157 | 7036975 | 978051  | integrin alpha L             | Itgal | 308995 | 1,25 | down |
| 5634292 | 7036975 | 978055  | integrin alpha L             | Itgal | 308995 | 1,21 | up   |
| 5640442 | 7036975 | 978038  | integrin alpha L             | Itgal | 308995 | 1,17 | down |
| 5654849 | 7036975 | 978047  | integrin alpha L             | Itgal | 308995 | 1,17 | up   |
| 5669308 | 7036975 | 978060  | integrin alpha L             | Itgal | 308995 | 1,47 | down |
| 5696950 | 7036975 | 978059  | integrin alpha L             | Itgal | 308995 | 1,35 | down |
| 5700061 | 7036975 | 978052  | integrin alpha L             | Itgal | 308995 | 1,51 | down |
| 5721086 | 7036975 | 978068  | integrin alpha L             | Itgal | 308995 | 2,33 | down |
| 5737388 | 7036975 | 978045  | integrin alpha L             | Itgal | 308995 | 1,00 | up   |
| 5842730 | 7036975 | 978053  | integrin alpha L             | Itgal | 308995 | 1,54 | down |
| 5881307 | 7036975 | 978061  | integrin alpha L             | Itgal | 308995 | 1,16 | down |
| 5931638 | 7036975 | 978063  | integrin alpha L             | Itgal | 308995 | 1,21 | up   |
| 5950408 | 7036975 | 978032  | integrin alpha L             | Itgal | 308995 | 1,12 | up   |
| 6026374 | 7036975 | 978034  | integrin alpha L             | Itgal | 308995 | 1,06 | up   |
| 6034948 | 7036975 | 978065  | integrin alpha L             | Itgal | 308995 | 1,04 | down |
| 6048491 | 7036975 | 978039  | integrin alpha L             | Itgal | 308995 | 1,36 | down |
| 6118182 | 7036975 | 978044  | integrin alpha L             | Itgal | 308995 | 1,28 | down |
| 6156703 | 7036975 | 978041  | integrin alpha L             | Itgal | 308995 | 1,30 | up   |
| 6232407 | 7036975 | 978033  | integrin alpha L             | Itgal | 308995 | 1,15 | up   |
| 6364444 | 7036975 | 978043  | integrin alpha L             | Itgal | 308995 | 1,07 | up   |
| 6365379 | 7036975 | 978066  | integrin alpha L             | Itgal | 308995 | 1,54 | down |
| 6451368 | 7036975 | 978068  | integrin alpha L             | Itgal | 308995 | 1,40 | down |

|         |         |         |                  |       |        |      |      |
|---------|---------|---------|------------------|-------|--------|------|------|
| 6473299 | 7036975 | 978035  | integrin alpha L | Itgal | 308995 | 1,44 | up   |
| 6490914 | 7036975 | 978035  | integrin alpha L | Itgal | 308995 | 1,19 | up   |
| 6548317 | 7036975 | 978056  | integrin alpha L | Itgal | 308995 | 1,83 | up   |
| 6577502 | 7036975 | 978051  | integrin alpha L | Itgal | 308995 | 1,18 | down |
| 6610961 | 7036975 | 978049  | integrin alpha L | Itgal | 308995 | 1,37 | down |
| 6619027 | 7036975 | 978048  | integrin alpha L | Itgal | 308995 | 1,13 | down |
| 6634770 | 7036975 | 978062  | integrin alpha L | Itgal | 308995 | 1,33 | up   |
| 6638661 | 7036975 | 978067  | integrin alpha L | Itgal | 308995 | 1,69 | down |
| 6682110 | 7036975 | 978042  | integrin alpha L | Itgal | 308995 | 1,28 | up   |
| 6706458 | 7036975 | 978057  | integrin alpha L | Itgal | 308995 | 1,17 | up   |
| 5640806 | 7221552 | 1426620 | integrin beta 2  | Itgb2 | 309684 | 1,10 | up   |
| 5716992 | 7221552 | 1426608 | integrin beta 2  | Itgb2 | 309684 | 1,62 | up   |
| 5749207 | 7221552 | 1426607 | integrin beta 2  | Itgb2 | 309684 | 1,09 | down |
| 5812967 | 7221552 | 1426613 | integrin beta 2  | Itgb2 | 309684 | 1,04 | up   |
| 5956164 | 7221552 | 1426609 | integrin beta 2  | Itgb2 | 309684 | 1,04 | up   |
| 6017204 | 7221552 | 1426612 | integrin beta 2  | Itgb2 | 309684 | 2,11 | up   |
| 6141050 | 7221552 | 1426607 | integrin beta 2  | Itgb2 | 309684 | 1,18 | down |
| 6143738 | 7221552 | 1426622 | integrin beta 2  | Itgb2 | 309684 | 1,10 | up   |
| 6207839 | 7221552 | 1426616 | integrin beta 2  | Itgb2 | 309684 | 1,11 | down |
| 6287547 | 7221552 | 1426615 | integrin beta 2  | Itgb2 | 309684 | 1,07 | down |
| 6394296 | 7221552 | 1426610 | integrin beta 2  | Itgb2 | 309684 | 1,15 | up   |
| 6396706 | 7221552 | 1426620 | integrin beta 2  | Itgb2 | 309684 | 1,11 | up   |
| 6422127 | 7221552 | 1426615 | integrin beta 2  | Itgb2 | 309684 | 1,12 | up   |
| 6460187 | 7221552 | 1426610 | integrin beta 2  | Itgb2 | 309684 | 1,03 | down |
| 6507701 | 7221552 | 1426617 | integrin beta 2  | Itgb2 | 309684 | 1,93 | down |
| 6609785 | 7221552 | 1426618 | integrin beta 2  | Itgb2 | 309684 | 1,86 | up   |
| 6616784 | 7221552 | 1426619 | integrin beta 2  | Itgb2 | 309684 | 1,01 | down |
| 6622261 | 7221552 | 1426614 | integrin beta 2  | Itgb2 | 309684 | 1,26 | up   |
| 6688029 | 7221552 | 1426611 | integrin beta 2  | Itgb2 | 309684 | 1,06 | down |
| 6740179 | 7221552 | 1426615 | integrin beta 2  | Itgb2 | 309684 | 1,86 | down |
| 5631726 | 7073691 | 1065242 | integrin beta 4  | Itgb4 | 25724  | 1,13 | up   |
| 5650295 | 7073691 | 1065247 | integrin beta 4  | Itgb4 | 25724  | 1,01 | down |
| 5661534 | 7073691 | 1065230 | integrin beta 4  | Itgb4 | 25724  | 1,06 | up   |
| 5675560 | 7073691 | 1065223 | integrin beta 4  | Itgb4 | 25724  | 1,27 | down |
| 5704564 | 7073691 | 1065246 | integrin beta 4  | Itgb4 | 25724  | 1,28 | up   |
| 5788922 | 7073691 | 1065255 | integrin beta 4  | Itgb4 | 25724  | 1,19 | up   |
| 5808148 | 7073691 | 1065253 | integrin beta 4  | Itgb4 | 25724  | 1,08 | up   |
| 5833131 | 7073691 | 1065236 | integrin beta 4  | Itgb4 | 25724  | 1,05 | down |
| 5860928 | 7073691 | 1065245 | integrin beta 4  | Itgb4 | 25724  | 1,74 | up   |
| 5869597 | 7073691 | 1065234 | integrin beta 4  | Itgb4 | 25724  | 1,48 | up   |
| 5956303 | 7073691 | 1065252 | integrin beta 4  | Itgb4 | 25724  | 1,00 | up   |
| 5981083 | 7073691 | 1065227 | integrin beta 4  | Itgb4 | 25724  | 1,04 | down |
| 6005867 | 7073691 | 1065248 | integrin beta 4  | Itgb4 | 25724  | 1,17 | up   |
| 6017012 | 7073691 | 1065222 | integrin beta 4  | Itgb4 | 25724  | 1,00 | down |
| 6041836 | 7073691 | 1065224 | integrin beta 4  | Itgb4 | 25724  | 1,44 | down |
| 6051643 | 7073691 | 1065217 | integrin beta 4  | Itgb4 | 25724  | 1,11 | up   |
| 6089132 | 7073691 | 1065225 | integrin beta 4  | Itgb4 | 25724  | 1,34 | down |
| 6149365 | 7073691 | 1065239 | integrin beta 4  | Itgb4 | 25724  | 2,01 | down |
| 6154943 | 7073691 | 1065231 | integrin beta 4  | Itgb4 | 25724  | 1,03 | up   |
| 6159076 | 7073691 | 1065241 | integrin beta 4  | Itgb4 | 25724  | 1,10 | up   |
| 6198100 | 7073691 | 1065226 | integrin beta 4  | Itgb4 | 25724  | 1,18 | up   |
| 6257764 | 7073691 | 1065244 | integrin beta 4  | Itgb4 | 25724  | 1,00 | up   |
| 6263599 | 7073691 | 1065228 | integrin beta 4  | Itgb4 | 25724  | 1,54 | up   |
| 6284505 | 7073691 | 1065251 | integrin beta 4  | Itgb4 | 25724  | 1,47 | down |
| 6318739 | 7073691 | 1065229 | integrin beta 4  | Itgb4 | 25724  | 1,04 | up   |
| 6325278 | 7073691 | 1065218 | integrin beta 4  | Itgb4 | 25724  | 1,07 | down |



|         |         |         |                                                     |       |        |      |      |
|---------|---------|---------|-----------------------------------------------------|-------|--------|------|------|
| 6398383 | 7073691 | 1065243 | integrin beta 4                                     | Itgb4 | 25724  | 1,05 | down |
| 6503457 | 7073691 | 1065238 | integrin beta 4                                     | Itgb4 | 25724  | 1,37 | down |
| 6507561 | 7073691 | 1065219 | integrin beta 4                                     | Itgb4 | 25724  | 1,42 | down |
| 6511677 | 7073691 | 1065250 | integrin beta 4                                     | Itgb4 | 25724  | 1,26 | up   |
| 6548262 | 7073691 | 1065240 | integrin beta 4                                     | Itgb4 | 25724  | 1,57 | up   |
| 6593975 | 7073691 | 1065232 | integrin beta 4                                     | Itgb4 | 25724  | 1,26 | down |
| 6604280 | 7073691 | 1065249 | integrin beta 4                                     | Itgb4 | 25724  | 1,64 | down |
| 6612976 | 7073691 | 1065233 | integrin beta 4                                     | Itgb4 | 25724  | 1,18 | up   |
| 6614126 | 7073691 | 1065235 | integrin beta 4                                     | Itgb4 | 25724  | 1,04 | up   |
| 6665402 | 7073691 | 1065221 | integrin beta 4                                     | Itgb4 | 25724  | 1,19 | down |
| 6674058 | 7073691 | 1065237 | integrin beta 4                                     | Itgb4 | 25724  | 1,82 | up   |
| 6681998 | 7073691 | 1065220 | integrin beta 4                                     | Itgb4 | 25724  | 1,04 | up   |
| 6717352 | 7073691 | 1065254 | integrin beta 4                                     | Itgb4 | 25724  | 1,52 | down |
| 5729425 | 7239369 | 1472214 | integrin, beta 6                                    | Itgb6 | 311061 | 1,06 | down |
| 5765638 | 7239369 | 1472215 | integrin, beta 6                                    | Itgb6 | 311061 | 1,47 | down |
| 5769483 | 7239369 | 1472213 | integrin, beta 6                                    | Itgb6 | 311061 | 1,19 | down |
| 5908590 | 7239369 | 1472212 | integrin, beta 6                                    | Itgb6 | 311061 | 1,10 | up   |
| 6000214 | 7239369 | 1472210 | integrin, beta 6                                    | Itgb6 | 311061 | 1,29 | down |
| 6078712 | 7239369 | 1472209 | integrin, beta 6                                    | Itgb6 | 311061 | 1,24 | up   |
| 6106032 | 7239369 | 1472209 | integrin, beta 6                                    | Itgb6 | 311061 | 1,52 | up   |
| 6140412 | 7239369 | 1472217 | integrin, beta 6                                    | Itgb6 | 311061 | 1,62 | down |
| 6167055 | 7239369 | 1472208 | integrin, beta 6                                    | Itgb6 | 311061 | 1,32 | down |
| 6179662 | 7239369 | 1472217 | integrin, beta 6                                    | Itgb6 | 311061 | 1,26 | up   |
| 6195577 | 7239369 | 1472206 | integrin, beta 6                                    | Itgb6 | 311061 | 1,08 | up   |
| 6373149 | 7239369 | 1472207 | integrin, beta 6                                    | Itgb6 | 311061 | 2,60 | down |
| 6433583 | 7239369 | 1472205 | integrin, beta 6                                    | Itgb6 | 311061 | 1,50 | down |
| 6464030 | 7239369 | 1472211 | integrin, beta 6                                    | Itgb6 | 311061 | 1,22 | up   |
| 6645708 | 7239369 | 1472216 | integrin, beta 6                                    | Itgb6 | 311061 | 1,29 | up   |
| 6671338 | 7239369 | 1472219 | integrin, beta 6                                    | Itgb6 | 311061 | 1,23 | up   |
| 6702902 | 7239369 | 1472218 | integrin, beta 6                                    | Itgb6 | 311061 | 1,12 | down |
| 5810668 | 7045955 | 1000736 | interactor protein for cytohesin exchange factors 1 | Ipcf1 | 361474 | 3,41 | up   |
| 5886652 | 7045955 | 1000740 | interactor protein for cytohesin exchange factors 1 | Ipcf1 | 361474 | 2,06 | up   |
| 5903140 | 7045955 | 1000747 | interactor protein for cytohesin exchange factors 1 | Ipcf1 | 361474 | 1,67 | up   |
| 5908286 | 7045955 | 1000736 | interactor protein for cytohesin exchange factors 1 | Ipcf1 | 361474 | 1,19 | down |
| 5983216 | 7045955 | 1000745 | interactor protein for cytohesin exchange factors 1 | Ipcf1 | 361474 | 1,01 | down |
| 6011612 | 7045955 | 1000737 | interactor protein for cytohesin exchange factors 1 | Ipcf1 | 361474 | 2,51 | up   |
| 6066641 | 7045955 | 1000740 | interactor protein for cytohesin exchange factors 1 | Ipcf1 | 361474 | 2,85 | up   |
| 6146668 | 7045955 | 1000749 | interactor protein for cytohesin exchange factors 1 | Ipcf1 | 361474 | 4,14 | up   |
| 6194989 | 7045955 | 1000748 | interactor protein for cytohesin exchange factors 1 | Ipcf1 | 361474 | 2,08 | up   |
| 6269323 | 7045955 | 1000736 | interactor protein for cytohesin exchange factors 1 | Ipcf1 | 361474 | 1,74 | up   |
| 6321260 | 7045955 | 1000754 | interactor protein for cytohesin exchange factors 1 | Ipcf1 | 361474 | 3,36 | down |
| 6491124 | 7045955 | 1000737 | interactor protein for cytohesin exchange factors 1 | Ipcf1 | 361474 | 3,84 | down |
| 6504211 | 7045955 | 1000754 | interactor protein for cytohesin exchange factors 1 | Ipcf1 | 361474 | 3,55 | down |
| 6604684 | 7045955 | 1000752 | interactor protein for cytohesin exchange factors 1 | Ipcf1 | 361474 | 1,74 | down |
| 6613630 | 7045955 | 1000736 | interactor protein for cytohesin exchange factors 1 | Ipcf1 | 361474 | 1,42 | up   |
| 5640225 | 7333460 | 1703633 | intercellular adhesion molecule 1                   | Icam1 | 25464  | 1,22 | down |
| 5646659 | 7333460 | 1703629 | intercellular adhesion molecule 1                   | Icam1 | 25464  | 1,09 | down |
| 5757177 | 7333460 | 1703627 | intercellular adhesion molecule 1                   | Icam1 | 25464  | 1,11 | up   |
| 5837747 | 7333460 | 1703628 | intercellular adhesion molecule 1                   | Icam1 | 25464  | 1,01 | up   |
| 6064524 | 7333460 | 1703632 | intercellular adhesion molecule 1                   | Icam1 | 25464  | 6,85 | up   |
| 6105288 | 7333460 | 1703631 | intercellular adhesion molecule 1                   | Icam1 | 25464  | 2,03 | down |
| 6137107 | 7333460 | 1703626 | intercellular adhesion molecule 1                   | Icam1 | 25464  | 1,10 | up   |
| 6465284 | 7333460 | 1703630 | intercellular adhesion molecule 1                   | Icam1 | 25464  | 1,49 | up   |
| 6472158 | 7333460 | 1703625 | intercellular adhesion molecule 1                   | Icam1 | 25464  | 1,74 | down |
| 6530440 | 7333460 | 1703626 | intercellular adhesion molecule 1                   | Icam1 | 25464  | 1,02 | down |
| 6663738 | 7333460 | 1703624 | intercellular adhesion molecule 1                   | Icam1 | 25464  | 5,93 | down |

|         |         |         |                                                             |        |        |      |      |
|---------|---------|---------|-------------------------------------------------------------|--------|--------|------|------|
| 5867799 | 7086751 | 1094637 | interferon (alpha and beta) receptor 1                      | Ifnar1 | 288264 | 1,28 | down |
| 5875433 | 7086751 | 1094626 | interferon (alpha and beta) receptor 1                      | Ifnar1 | 288264 | 1,32 | up   |
| 5989636 | 7086751 | 1094628 | interferon (alpha and beta) receptor 1                      | Ifnar1 | 288264 | 1,13 | down |
| 6207356 | 7086751 | 1094633 | interferon (alpha and beta) receptor 1                      | Ifnar1 | 288264 | 1,16 | up   |
| 6263024 | 7086751 | 1094640 | interferon (alpha and beta) receptor 1                      | Ifnar1 | 288264 | 1,10 | up   |
| 6267542 | 7086751 | 1094631 | interferon (alpha and beta) receptor 1                      | Ifnar1 | 288264 | 1,44 | up   |
| 6331707 | 7086751 | 1094635 | interferon (alpha and beta) receptor 1                      | Ifnar1 | 288264 | 1,50 | down |
| 6435745 | 7086751 | 1094641 | interferon (alpha and beta) receptor 1                      | Ifnar1 | 288264 | 1,19 | down |
| 6477758 | 7086751 | 1094626 | interferon (alpha and beta) receptor 1                      | Ifnar1 | 288264 | 1,09 | up   |
| 6494324 | 7086751 | 1094641 | interferon (alpha and beta) receptor 1                      | Ifnar1 | 288264 | 1,80 | down |
| 6508079 | 7086751 | 1094628 | interferon (alpha and beta) receptor 1                      | Ifnar1 | 288264 | 1,40 | up   |
| 6587998 | 7086751 | 1094626 | interferon (alpha and beta) receptor 1                      | Ifnar1 | 288264 | 1,48 | down |
| 6609690 | 7086751 | 1094641 | interferon (alpha and beta) receptor 1                      | Ifnar1 | 288264 | 1,27 | up   |
| 6609972 | 7086751 | 1094641 | interferon (alpha and beta) receptor 1                      | Ifnar1 | 288264 | 1,12 | up   |
| 6650413 | 7086751 | 1094638 | interferon (alpha and beta) receptor 1                      | Ifnar1 | 288264 | 1,16 | up   |
| 6668336 | 7086751 | 1094627 | interferon (alpha and beta) receptor 1                      | Ifnar1 | 288264 | 1,46 | up   |
| 6702814 | 7086751 | 1094630 | interferon (alpha and beta) receptor 1                      | Ifnar1 | 288264 | 2,23 | up   |
| 5790369 | 7067089 | 1048925 | interferon gamma inducible protein 47                       | Ifi47  | 246208 | 1,85 | up   |
| 5966964 | 7067089 | 1048925 | interferon gamma inducible protein 47                       | Ifi47  | 246208 | 1,05 | up   |
| 5975949 | 7067089 | 1048926 | interferon gamma inducible protein 47                       | Ifi47  | 246208 | 1,07 | up   |
| 6244516 | 7067089 | 1048924 | interferon gamma inducible protein 47                       | Ifi47  | 246208 | 3,74 | down |
| 6681560 | 7067089 | 1048925 | interferon gamma inducible protein 47                       | Ifi47  | 246208 | 1,35 | up   |
| 5631659 | 7067595 | 1050154 | interferon regulatory factor 1                              | Irf1   | 24508  | 1,23 | down |
| 5670836 | 7067595 | 1050148 | interferon regulatory factor 1                              | Irf1   | 24508  | 1,10 | up   |
| 5705927 | 7067595 | 1050153 | interferon regulatory factor 1                              | Irf1   | 24508  | 1,12 | down |
| 5724920 | 7067595 | 1050150 | interferon regulatory factor 1                              | Irf1   | 24508  | 1,03 | down |
| 5865012 | 7067595 | 1050155 | interferon regulatory factor 1                              | Irf1   | 24508  | 1,31 | up   |
| 6010551 | 7067595 | 1050156 | interferon regulatory factor 1                              | Irf1   | 24508  | 1,18 | down |
| 6095845 | 7067595 | 1050147 | interferon regulatory factor 1                              | Irf1   | 24508  | 2,17 | up   |
| 6353899 | 7067595 | 1050152 | interferon regulatory factor 1                              | Irf1   | 24508  | 1,19 | down |
| 6400967 | 7067595 | 1050151 | interferon regulatory factor 1                              | Irf1   | 24508  | 1,23 | up   |
| 6525703 | 7067595 | 1050147 | interferon regulatory factor 1                              | Irf1   | 24508  | 1,93 | down |
| 6527640 | 7067595 | 1050149 | interferon regulatory factor 1                              | Irf1   | 24508  | 1,16 | down |
| 5653623 | 7293880 | 1605898 | interferon, alpha-inducible protein (clone IFI-15K)         | G1p2   | 298693 | 4,17 | down |
| 5849956 | 7293880 | 1605899 | interferon, alpha-inducible protein (clone IFI-15K)         | G1p2   | 298693 | 1,07 | up   |
| 6665757 | 7293880 | 1605898 | interferon, alpha-inducible protein (clone IFI-15K)         | G1p2   | 298693 | 2,46 | up   |
| 5679435 | 7215722 | 1412260 | interferon-induced protein 44                               | Ifi44  | 310969 | 1,13 | down |
| 5747588 | 7215722 | 1412269 | interferon-induced protein 44                               | Ifi44  | 310969 | 1,58 | up   |
| 5842249 | 7215722 | 1412264 | interferon-induced protein 44                               | Ifi44  | 310969 | 1,43 | up   |
| 5864289 | 7215722 | 1412269 | interferon-induced protein 44                               | Ifi44  | 310969 | 2,07 | up   |
| 5868049 | 7215722 | 1412263 | interferon-induced protein 44                               | Ifi44  | 310969 | 2,18 | up   |
| 5963580 | 7215722 | 1412260 | interferon-induced protein 44                               | Ifi44  | 310969 | 1,18 | down |
| 6097166 | 7215722 | 1412270 | interferon-induced protein 44                               | Ifi44  | 310969 | 3,16 | down |
| 6184026 | 7215722 | 1412268 | interferon-induced protein 44                               | Ifi44  | 310969 | 1,49 | up   |
| 6234758 | 7215722 | 1412267 | interferon-induced protein 44                               | Ifi44  | 310969 | 1,98 | down |
| 6377285 | 7215722 | 1412269 | interferon-induced protein 44                               | Ifi44  | 310969 | 1,63 | up   |
| 6468757 | 7215722 | 1412270 | interferon-induced protein 44                               | Ifi44  | 310969 | 1,82 | down |
| 6513850 | 7215722 | 1412261 | interferon-induced protein 44                               | Ifi44  | 310969 | 1,38 | up   |
| 6545369 | 7215722 | 1412260 | interferon-induced protein 44                               | Ifi44  | 310969 | 1,41 | down |
| 6586895 | 7215722 | 1412262 | interferon-induced protein 44                               | Ifi44  | 310969 | 1,15 | up   |
| 6731623 | 7215722 | 1412269 | interferon-induced protein 44                               | Ifi44  | 310969 | 2,38 | up   |
| 6740143 | 7215722 | 1412260 | interferon-induced protein 44                               | Ifi44  | 310969 | 2,19 | down |
| 5856184 | 7041465 | 989111  | interferon-induced protein with tetratricopeptide repeats 2 | Ifit2  | 294091 | 1,72 | down |
| 5967365 | 7041465 | 989112  | interferon-induced protein with tetratricopeptide repeats 2 | Ifit2  | 294091 | 5,23 | up   |
| 6323553 | 7041465 | 989112  | interferon-induced protein with tetratricopeptide repeats 2 | Ifit2  | 294091 | 1,65 | up   |
| 6336777 | 7041465 | 989111  | interferon-induced protein with tetratricopeptide repeats 2 | Ifit2  | 294091 | 1,45 | down |

|         |         |         |                                                             |         |        |      |      |
|---------|---------|---------|-------------------------------------------------------------|---------|--------|------|------|
| 6071816 | 7041467 | 989117  | interferon-induced protein with tetratricopeptide repeats 3 | Ifit3   | 309526 | 1,23 | up   |
| 6175162 | 7041467 | 989116  | interferon-induced protein with tetratricopeptide repeats 3 | Ifit3   | 309526 | 2,66 | up   |
| 6287495 | 7041467 | 989115  | interferon-induced protein with tetratricopeptide repeats 3 | Ifit3   | 309526 | 3,20 | down |
| 5639168 | 7353809 | 1754149 | interleukin 1 receptor, type II                             | Il1r2   | 117022 | 1,18 | down |
| 5761209 | 7353809 | 1754148 | interleukin 1 receptor, type II                             | Il1r2   | 117022 | 1,39 | down |
| 5774975 | 7353809 | 1754150 | interleukin 1 receptor, type II                             | Il1r2   | 117022 | 1,02 | down |
| 5867827 | 7353809 | 1754146 | interleukin 1 receptor, type II                             | Il1r2   | 117022 | 1,07 | down |
| 5890744 | 7353809 | 1754152 | interleukin 1 receptor, type II                             | Il1r2   | 117022 | 1,03 | up   |
| 5973117 | 7353809 | 1754146 | interleukin 1 receptor, type II                             | Il1r2   | 117022 | 1,43 | down |
| 5986927 | 7353809 | 1754145 | interleukin 1 receptor, type II                             | Il1r2   | 117022 | 2,04 | up   |
| 6129588 | 7353809 | 1754151 | interleukin 1 receptor, type II                             | Il1r2   | 117022 | 1,06 | up   |
| 6249165 | 7353809 | 1754145 | interleukin 1 receptor, type II                             | Il1r2   | 117022 | 1,16 | up   |
| 6310721 | 7353809 | 1754152 | interleukin 1 receptor, type II                             | Il1r2   | 117022 | 1,02 | up   |
| 6489934 | 7353809 | 1754147 | interleukin 1 receptor, type II                             | Il1r2   | 117022 | 1,19 | down |
| 6733724 | 7353809 | 1754146 | interleukin 1 receptor, type II                             | Il1r2   | 117022 | 1,23 | down |
| 5720501 | 7378996 | 1818601 | interleukin 13 receptor, alpha 1                            | Il13ra1 | 252963 | 1,72 | down |
| 5757100 | 7378996 | 1818604 | interleukin 13 receptor, alpha 1                            | Il13ra1 | 252963 | 1,08 | up   |
| 5777761 | 7378996 | 1818599 | interleukin 13 receptor, alpha 1                            | Il13ra1 | 252963 | 1,19 | up   |
| 5930764 | 7378996 | 1818596 | interleukin 13 receptor, alpha 1                            | Il13ra1 | 252963 | 1,18 | down |
| 5971870 | 7378996 | 1818600 | interleukin 13 receptor, alpha 1                            | Il13ra1 | 252963 | 1,00 | up   |
| 6013481 | 7378996 | 1818605 | interleukin 13 receptor, alpha 1                            | Il13ra1 | 252963 | 1,08 | up   |
| 6053292 | 7378996 | 1818610 | interleukin 13 receptor, alpha 1                            | Il13ra1 | 252963 | 1,02 | up   |
| 6127638 | 7378996 | 1818602 | interleukin 13 receptor, alpha 1                            | Il13ra1 | 252963 | 1,05 | down |
| 6530824 | 7378996 | 1818596 | interleukin 13 receptor, alpha 1                            | Il13ra1 | 252963 | 1,17 | down |
| 6569195 | 7378996 | 1818606 | interleukin 13 receptor, alpha 1                            | Il13ra1 | 252963 | 1,14 | up   |
| 6623696 | 7378996 | 1818614 | interleukin 13 receptor, alpha 1                            | Il13ra1 | 252963 | 1,14 | up   |
| 6723639 | 7378996 | 1818598 | interleukin 13 receptor, alpha 1                            | Il13ra1 | 252963 | 1,26 | down |
| 5648320 | 7180064 | 1325051 | interleukin 15                                              | Il15    | 25670  | 2,25 | down |
| 5856391 | 7180064 | 1325052 | interleukin 15                                              | Il15    | 25670  | 1,44 | up   |
| 5858117 | 7180064 | 1325053 | interleukin 15                                              | Il15    | 25670  | 1,71 | down |
| 5877860 | 7180064 | 1325052 | interleukin 15                                              | Il15    | 25670  | 1,14 | down |
| 6170178 | 7180064 | 1325048 | interleukin 15                                              | Il15    | 25670  | 1,07 | up   |
| 6214446 | 7180064 | 1325050 | interleukin 15                                              | Il15    | 25670  | 1,19 | up   |
| 6252968 | 7180064 | 1325047 | interleukin 15                                              | Il15    | 25670  | 1,35 | down |
| 6346734 | 7180064 | 1325050 | interleukin 15                                              | Il15    | 25670  | 1,16 | up   |
| 6373298 | 7180064 | 1325046 | interleukin 15                                              | Il15    | 25670  | 1,41 | up   |
| 6608886 | 7180064 | 1325054 | interleukin 15                                              | Il15    | 25670  | 3,06 | down |
| 6619104 | 7180064 | 1325045 | interleukin 15                                              | Il15    | 25670  | 3,98 | down |
| 6745272 | 7180064 | 1325049 | interleukin 15                                              | Il15    | 25670  | 1,62 | up   |
| 5857595 | 7257976 | 1517704 | interleukin 17 receptor A                                   | Il17ra  | 312679 | 1,18 | up   |
| 5984304 | 7257976 | 1517697 | interleukin 17 receptor A                                   | Il17ra  | 312679 | 1,10 | down |
| 6122011 | 7257976 | 1517700 | interleukin 17 receptor A                                   | Il17ra  | 312679 | 1,10 | up   |
| 6183635 | 7257976 | 1517709 | interleukin 17 receptor A                                   | Il17ra  | 312679 | 1,22 | up   |
| 6252032 | 7257976 | 1517703 | interleukin 17 receptor A                                   | Il17ra  | 312679 | 1,07 | down |
| 6274953 | 7257976 | 1517708 | interleukin 17 receptor A                                   | Il17ra  | 312679 | 1,20 | down |
| 6323077 | 7257976 | 1517701 | interleukin 17 receptor A                                   | Il17ra  | 312679 | 1,46 | up   |
| 6344930 | 7257976 | 1517707 | interleukin 17 receptor A                                   | Il17ra  | 312679 | 1,32 | up   |
| 6373251 | 7257976 | 1517710 | interleukin 17 receptor A                                   | Il17ra  | 312679 | 1,06 | down |
| 6538807 | 7257976 | 1517698 | interleukin 17 receptor A                                   | Il17ra  | 312679 | 1,34 | up   |
| 6576094 | 7257976 | 1517702 | interleukin 17 receptor A                                   | Il17ra  | 312679 | 1,13 | down |
| 6674997 | 7257976 | 1517699 | interleukin 17 receptor A                                   | Il17ra  | 312679 | 1,05 | up   |
| 5728665 | 7257404 | 1516165 | interleukin 17 receptor E                                   | Il17re  | 362417 | 1,47 | down |
| 5783347 | 7257404 | 1516178 | interleukin 17 receptor E                                   | Il17re  | 362417 | 1,07 | down |
| 5845755 | 7257404 | 1516167 | interleukin 17 receptor E                                   | Il17re  | 362417 | 1,06 | down |
| 5847859 | 7257404 | 1516178 | interleukin 17 receptor E                                   | Il17re  | 362417 | 1,04 | up   |
| 5862082 | 7257404 | 1516166 | interleukin 17 receptor E                                   | Il17re  | 362417 | 1,13 | down |

|         |         |         |                                |        |        |      |      |
|---------|---------|---------|--------------------------------|--------|--------|------|------|
| 5874328 | 7257404 | 1516174 | interleukin 17 receptor E      | Il17re | 362417 | 1,09 | down |
| 5971661 | 7257404 | 1516173 | interleukin 17 receptor E      | Il17re | 362417 | 1,21 | up   |
| 6003327 | 7257404 | 1516170 | interleukin 17 receptor E      | Il17re | 362417 | 1,02 | down |
| 6100662 | 7257404 | 1516171 | interleukin 17 receptor E      | Il17re | 362417 | 1,10 | up   |
| 6140258 | 7257404 | 1516169 | interleukin 17 receptor E      | Il17re | 362417 | 1,06 | up   |
| 6162434 | 7257404 | 1516178 | interleukin 17 receptor E      | Il17re | 362417 | 1,19 | up   |
| 6188851 | 7257404 | 1516167 | interleukin 17 receptor E      | Il17re | 362417 | 1,12 | up   |
| 6256895 | 7257404 | 1516168 | interleukin 17 receptor E      | Il17re | 362417 | 1,02 | up   |
| 6260339 | 7257404 | 1516178 | interleukin 17 receptor E      | Il17re | 362417 | 1,24 | down |
| 6314030 | 7257404 | 1516167 | interleukin 17 receptor E      | Il17re | 362417 | 1,09 | down |
| 6422950 | 7257404 | 1516177 | interleukin 17 receptor E      | Il17re | 362417 | 2,18 | down |
| 6508470 | 7257404 | 1516178 | interleukin 17 receptor E      | Il17re | 362417 | 1,61 | up   |
| 6511776 | 7257404 | 1516175 | interleukin 17 receptor E      | Il17re | 362417 | 1,20 | up   |
| 6516065 | 7257404 | 1516172 | interleukin 17 receptor E      | Il17re | 362417 | 1,14 | up   |
| 6718656 | 7257404 | 1516176 | interleukin 17 receptor E      | Il17re | 362417 | 1,39 | down |
| 5775261 | 7055111 | 1020954 | interleukin 18 binding protein | Il18bp | 84388  | 3,65 | down |
| 5996430 | 7055111 | 1020955 | interleukin 18 binding protein | Il18bp | 84388  | 1,31 | up   |
| 6297372 | 7055111 | 1020957 | interleukin 18 binding protein | Il18bp | 84388  | 1,12 | up   |
| 6566023 | 7055111 | 1020956 | interleukin 18 binding protein | Il18bp | 84388  | 1,38 | down |
| 6685678 | 7055111 | 1020956 | interleukin 18 binding protein | Il18bp | 84388  | 1,59 | up   |
| 6703233 | 7055111 | 1020958 | interleukin 18 binding protein | Il18bp | 84388  | 2,22 | down |
| 5628954 | 7025363 | 949486  | interleukin 20 receptor, alpha | Il20ra | 308716 | 1,49 | down |
| 5638442 | 7025363 | 949484  | interleukin 20 receptor, alpha | Il20ra | 308716 | 1,67 | down |
| 5669752 | 7025363 | 949483  | interleukin 20 receptor, alpha | Il20ra | 308716 | 1,23 | up   |
| 5688187 | 7025363 | 949488  | interleukin 20 receptor, alpha | Il20ra | 308716 | 2,13 | up   |
| 5924812 | 7025363 | 949487  | interleukin 20 receptor, alpha | Il20ra | 308716 | 1,46 | down |
| 5948671 | 7025363 | 949488  | interleukin 20 receptor, alpha | Il20ra | 308716 | 1,43 | down |
| 6182512 | 7025363 | 949480  | interleukin 20 receptor, alpha | Il20ra | 308716 | 1,21 | up   |
| 6364303 | 7025363 | 949488  | interleukin 20 receptor, alpha | Il20ra | 308716 | 1,24 | up   |
| 6482678 | 7025363 | 949475  | interleukin 20 receptor, alpha | Il20ra | 308716 | 1,28 | up   |
| 6600662 | 7025363 | 949487  | interleukin 20 receptor, alpha | Il20ra | 308716 | 1,05 | down |
| 6722620 | 7025363 | 949485  | interleukin 20 receptor, alpha | Il20ra | 308716 | 1,09 | up   |
| 5683898 | 7179914 | 1324724 | interleukin 27 receptor, alpha | Il27ra | 288905 | 1,10 | down |
| 5745170 | 7179914 | 1324712 | interleukin 27 receptor, alpha | Il27ra | 288905 | 1,13 | up   |
| 5809342 | 7179914 | 1324710 | interleukin 27 receptor, alpha | Il27ra | 288905 | 1,64 | up   |
| 5826995 | 7179914 | 1324713 | interleukin 27 receptor, alpha | Il27ra | 288905 | 1,48 | down |
| 5866510 | 7179914 | 1324716 | interleukin 27 receptor, alpha | Il27ra | 288905 | 1,47 | down |
| 5878066 | 7179914 | 1324724 | interleukin 27 receptor, alpha | Il27ra | 288905 | 1,01 | down |
| 5908316 | 7179914 | 1324711 | interleukin 27 receptor, alpha | Il27ra | 288905 | 1,22 | up   |
| 5957830 | 7179914 | 1324715 | interleukin 27 receptor, alpha | Il27ra | 288905 | 1,23 | down |
| 6041053 | 7179914 | 1324723 | interleukin 27 receptor, alpha | Il27ra | 288905 | 1,02 | up   |
| 6058337 | 7179914 | 1324721 | interleukin 27 receptor, alpha | Il27ra | 288905 | 1,23 | down |
| 6109864 | 7179914 | 1324724 | interleukin 27 receptor, alpha | Il27ra | 288905 | 1,09 | up   |
| 6251282 | 7179914 | 1324714 | interleukin 27 receptor, alpha | Il27ra | 288905 | 1,13 | up   |
| 6472361 | 7179914 | 1324720 | interleukin 27 receptor, alpha | Il27ra | 288905 | 2,67 | down |
| 6595485 | 7179914 | 1324710 | interleukin 27 receptor, alpha | Il27ra | 288905 | 1,06 | up   |
| 5866617 | 7100909 | 1129752 | interleukin 3 receptor, alpha  | Il3ra  | 246144 | 2,12 | up   |
| 5955831 | 7100909 | 1129751 | interleukin 3 receptor, alpha  | Il3ra  | 246144 | 1,09 | down |
| 6190571 | 7100909 | 1129756 | interleukin 3 receptor, alpha  | Il3ra  | 246144 | 1,16 | down |
| 6227402 | 7100909 | 1129755 | interleukin 3 receptor, alpha  | Il3ra  | 246144 | 1,52 | up   |
| 6330591 | 7100909 | 1129756 | interleukin 3 receptor, alpha  | Il3ra  | 246144 | 1,01 | down |
| 6364485 | 7100909 | 1129756 | interleukin 3 receptor, alpha  | Il3ra  | 246144 | 1,15 | down |
| 6444733 | 7100909 | 1129750 | interleukin 3 receptor, alpha  | Il3ra  | 246144 | 1,21 | up   |
| 6510671 | 7100909 | 1129750 | interleukin 3 receptor, alpha  | Il3ra  | 246144 | 1,02 | down |
| 6616320 | 7100909 | 1129756 | interleukin 3 receptor, alpha  | Il3ra  | 246144 | 1,09 | down |
| 6675065 | 7100909 | 1129753 | interleukin 3 receptor, alpha  | Il3ra  | 246144 | 1,14 | down |

|         |         |         |                                                     |        |        |      |      |
|---------|---------|---------|-----------------------------------------------------|--------|--------|------|------|
| 6717270 | 7100909 | 1129754 | interleukin 3 receptor, alpha                       | Il3ra  | 246144 | 1,25 | down |
| 6421333 | 7203872 | 1384777 | interleukin 31 receptor A                           | Il31ra | 688622 | 1,06 | down |
| 5738505 | 7086772 | 1094745 | intersectin 1 (SH3 domain protein)                  | Itsn1  | 29491  | 1,41 | down |
| 5799975 | 7086772 | 1094762 | intersectin 1 (SH3 domain protein)                  | Itsn1  | 29491  | 1,03 | up   |
| 5813683 | 7086772 | 1094748 | intersectin 1 (SH3 domain protein)                  | Itsn1  | 29491  | 1,54 | down |
| 5826295 | 7086772 | 1094746 | intersectin 1 (SH3 domain protein)                  | Itsn1  | 29491  | 1,28 | up   |
| 5838820 | 7086772 | 1094756 | intersectin 1 (SH3 domain protein)                  | Itsn1  | 29491  | 1,20 | down |
| 5861468 | 7086772 | 1094757 | intersectin 1 (SH3 domain protein)                  | Itsn1  | 29491  | 1,24 | up   |
| 5890455 | 7086772 | 1094747 | intersectin 1 (SH3 domain protein)                  | Itsn1  | 29491  | 1,12 | down |
| 5901444 | 7086772 | 1094743 | intersectin 1 (SH3 domain protein)                  | Itsn1  | 29491  | 1,04 | up   |
| 5904817 | 7086772 | 1094739 | intersectin 1 (SH3 domain protein)                  | Itsn1  | 29491  | 1,09 | up   |
| 6139186 | 7086772 | 1094736 | intersectin 1 (SH3 domain protein)                  | Itsn1  | 29491  | 1,05 | up   |
| 6242893 | 7086772 | 1094736 | intersectin 1 (SH3 domain protein)                  | Itsn1  | 29491  | 2,02 | up   |
| 6266640 | 7086772 | 1094741 | intersectin 1 (SH3 domain protein)                  | Itsn1  | 29491  | 1,11 | down |
| 6280874 | 7086772 | 1094751 | intersectin 1 (SH3 domain protein)                  | Itsn1  | 29491  | 1,12 | up   |
| 6296059 | 7086772 | 1094758 | intersectin 1 (SH3 domain protein)                  | Itsn1  | 29491  | 1,05 | up   |
| 6296087 | 7086772 | 1094749 | intersectin 1 (SH3 domain protein)                  | Itsn1  | 29491  | 1,08 | down |
| 6310155 | 7086772 | 1094763 | intersectin 1 (SH3 domain protein)                  | Itsn1  | 29491  | 2,52 | up   |
| 6330021 | 7086772 | 1094744 | intersectin 1 (SH3 domain protein)                  | Itsn1  | 29491  | 1,26 | up   |
| 6332897 | 7086772 | 1094744 | intersectin 1 (SH3 domain protein)                  | Itsn1  | 29491  | 1,04 | down |
| 6371317 | 7086772 | 1094754 | intersectin 1 (SH3 domain protein)                  | Itsn1  | 29491  | 1,06 | down |
| 6377075 | 7086772 | 1094738 | intersectin 1 (SH3 domain protein)                  | Itsn1  | 29491  | 1,26 | down |
| 6407981 | 7086772 | 1094745 | intersectin 1 (SH3 domain protein)                  | Itsn1  | 29491  | 1,19 | down |
| 6429205 | 7086772 | 1094742 | intersectin 1 (SH3 domain protein)                  | Itsn1  | 29491  | 1,30 | up   |
| 6448089 | 7086772 | 1094759 | intersectin 1 (SH3 domain protein)                  | Itsn1  | 29491  | 1,06 | down |
| 6464960 | 7086772 | 1094753 | intersectin 1 (SH3 domain protein)                  | Itsn1  | 29491  | 1,28 | up   |
| 6520905 | 7086772 | 1094761 | intersectin 1 (SH3 domain protein)                  | Itsn1  | 29491  | 1,04 | down |
| 6597304 | 7086772 | 1094752 | intersectin 1 (SH3 domain protein)                  | Itsn1  | 29491  | 1,38 | up   |
| 6623039 | 7086772 | 1094755 | intersectin 1 (SH3 domain protein)                  | Itsn1  | 29491  | 1,22 | down |
| 6658347 | 7086772 | 1094760 | intersectin 1 (SH3 domain protein)                  | Itsn1  | 29491  | 1,55 | down |
| 6663691 | 7086772 | 1094750 | intersectin 1 (SH3 domain protein)                  | Itsn1  | 29491  | 1,03 | down |
| 6674436 | 7086772 | 1094740 | intersectin 1 (SH3 domain protein)                  | Itsn1  | 29491  | 1,18 | up   |
| 6713447 | 7086772 | 1094737 | intersectin 1 (SH3 domain protein)                  | Itsn1  | 29491  | 1,38 | down |
| 6738947 | 7086772 | 1094744 | intersectin 1 (SH3 domain protein)                  | Itsn1  | 29491  | 1,07 | up   |
| 5646605 | 7235076 | 1461033 | intraflagellar transport 52 homolog (Chlamydomonas) | Ift52  | 362265 | 1,32 | down |
| 5779227 | 7235076 | 1461033 | intraflagellar transport 52 homolog (Chlamydomonas) | Ift52  | 362265 | 1,30 | down |
| 5826148 | 7235076 | 1461019 | intraflagellar transport 52 homolog (Chlamydomonas) | Ift52  | 362265 | 2,60 | down |
| 5845460 | 7235076 | 1461021 | intraflagellar transport 52 homolog (Chlamydomonas) | Ift52  | 362265 | 1,07 | down |
| 5854070 | 7235076 | 1461032 | intraflagellar transport 52 homolog (Chlamydomonas) | Ift52  | 362265 | 1,07 | down |
| 5874630 | 7235076 | 1461025 | intraflagellar transport 52 homolog (Chlamydomonas) | Ift52  | 362265 | 1,46 | up   |
| 5981286 | 7235076 | 1461033 | intraflagellar transport 52 homolog (Chlamydomonas) | Ift52  | 362265 | 1,94 | down |
| 6046278 | 7235076 | 1461027 | intraflagellar transport 52 homolog (Chlamydomonas) | Ift52  | 362265 | 1,03 | down |
| 6189116 | 7235076 | 1461024 | intraflagellar transport 52 homolog (Chlamydomonas) | Ift52  | 362265 | 1,39 | up   |
| 6267824 | 7235076 | 1461026 | intraflagellar transport 52 homolog (Chlamydomonas) | Ift52  | 362265 | 1,08 | up   |
| 6274900 | 7235076 | 1461028 | intraflagellar transport 52 homolog (Chlamydomonas) | Ift52  | 362265 | 1,25 | up   |
| 6301326 | 7235076 | 1461023 | intraflagellar transport 52 homolog (Chlamydomonas) | Ift52  | 362265 | 1,01 | down |
| 6351701 | 7235076 | 1461030 | intraflagellar transport 52 homolog (Chlamydomonas) | Ift52  | 362265 | 1,06 | down |
| 6398498 | 7235076 | 1461022 | intraflagellar transport 52 homolog (Chlamydomonas) | Ift52  | 362265 | 1,30 | up   |
| 6702421 | 7235076 | 1461020 | intraflagellar transport 52 homolog (Chlamydomonas) | Ift52  | 362265 | 1,24 | up   |
| 5696801 | 7132263 | 1206922 | intraflagellar transport 88 homolog (Chlamydomonas) | Ift88  | 305918 | 1,56 | up   |
| 5705196 | 7132263 | 1206898 | intraflagellar transport 88 homolog (Chlamydomonas) | Ift88  | 305918 | 1,28 | down |
| 5789413 | 7132263 | 1206896 | intraflagellar transport 88 homolog (Chlamydomonas) | Ift88  | 305918 | 1,57 | up   |
| 5791569 | 7132263 | 1206922 | intraflagellar transport 88 homolog (Chlamydomonas) | Ift88  | 305918 | 1,64 | up   |
| 5864626 | 7132263 | 1206914 | intraflagellar transport 88 homolog (Chlamydomonas) | Ift88  | 305918 | 1,05 | down |
| 5878088 | 7132263 | 1206904 | intraflagellar transport 88 homolog (Chlamydomonas) | Ift88  | 305918 | 1,05 | down |
| 5890071 | 7132263 | 1206891 | intraflagellar transport 88 homolog (Chlamydomonas) | Ift88  | 305918 | 1,05 | down |

|         |         |         |                                                     |        |        |      |      |
|---------|---------|---------|-----------------------------------------------------|--------|--------|------|------|
| 5911128 | 7132263 | 1206899 | intraflagellar transport 88 homolog (Chlamydomonas) | Ift88  | 305918 | 1,12 | up   |
| 6011079 | 7132263 | 1206920 | intraflagellar transport 88 homolog (Chlamydomonas) | Ift88  | 305918 | 1,14 | up   |
| 6098899 | 7132263 | 1206900 | intraflagellar transport 88 homolog (Chlamydomonas) | Ift88  | 305918 | 1,22 | up   |
| 6110373 | 7132263 | 1206901 | intraflagellar transport 88 homolog (Chlamydomonas) | Ift88  | 305918 | 1,11 | down |
| 6223241 | 7132263 | 1206912 | intraflagellar transport 88 homolog (Chlamydomonas) | Ift88  | 305918 | 1,31 | up   |
| 6246912 | 7132263 | 1206902 | intraflagellar transport 88 homolog (Chlamydomonas) | Ift88  | 305918 | 1,05 | down |
| 6290216 | 7132263 | 1206913 | intraflagellar transport 88 homolog (Chlamydomonas) | Ift88  | 305918 | 1,21 | down |
| 6335325 | 7132263 | 1206906 | intraflagellar transport 88 homolog (Chlamydomonas) | Ift88  | 305918 | 1,78 | down |
| 6346401 | 7132263 | 1206894 | intraflagellar transport 88 homolog (Chlamydomonas) | Ift88  | 305918 | 1,41 | down |
| 6405713 | 7132263 | 1206895 | intraflagellar transport 88 homolog (Chlamydomonas) | Ift88  | 305918 | 1,08 | down |
| 6478163 | 7132263 | 1206908 | intraflagellar transport 88 homolog (Chlamydomonas) | Ift88  | 305918 | 1,37 | down |
| 6514534 | 7132263 | 1206911 | intraflagellar transport 88 homolog (Chlamydomonas) | Ift88  | 305918 | 1,07 | down |
| 6533414 | 7132263 | 1206915 | intraflagellar transport 88 homolog (Chlamydomonas) | Ift88  | 305918 | 1,12 | up   |
| 6536185 | 7132263 | 1206897 | intraflagellar transport 88 homolog (Chlamydomonas) | Ift88  | 305918 | 1,34 | up   |
| 6596979 | 7132263 | 1206890 | intraflagellar transport 88 homolog (Chlamydomonas) | Ift88  | 305918 | 1,32 | up   |
| 6597192 | 7132263 | 1206922 | intraflagellar transport 88 homolog (Chlamydomonas) | Ift88  | 305918 | 1,14 | down |
| 6619216 | 7132263 | 1206899 | intraflagellar transport 88 homolog (Chlamydomonas) | Ift88  | 305918 | 1,30 | down |
| 6632089 | 7132263 | 1206903 | intraflagellar transport 88 homolog (Chlamydomonas) | Ift88  | 305918 | 1,07 | up   |
| 6650048 | 7132263 | 1206917 | intraflagellar transport 88 homolog (Chlamydomonas) | Ift88  | 305918 | 1,02 | down |
| 6688980 | 7132263 | 1206909 | intraflagellar transport 88 homolog (Chlamydomonas) | Ift88  | 305918 | 1,31 | down |
| 6695500 | 7132263 | 1206893 | intraflagellar transport 88 homolog (Chlamydomonas) | Ift88  | 305918 | 3,15 | up   |
| 5715338 | 7292953 | 1603693 | invasion inhibitory protein 45                      | Iip45  | 298643 | 1,00 | up   |
| 5758519 | 7292953 | 1603703 | invasion inhibitory protein 45                      | Iip45  | 298643 | 1,23 | down |
| 5770819 | 7292953 | 1603693 | invasion inhibitory protein 45                      | Iip45  | 298643 | 1,03 | down |
| 5782257 | 7292953 | 1603697 | invasion inhibitory protein 45                      | Iip45  | 298643 | 1,06 | up   |
| 5823717 | 7292953 | 1603700 | invasion inhibitory protein 45                      | Iip45  | 298643 | 1,80 | down |
| 5857736 | 7292953 | 1603704 | invasion inhibitory protein 45                      | Iip45  | 298643 | 1,10 | down |
| 5982703 | 7292953 | 1603698 | invasion inhibitory protein 45                      | Iip45  | 298643 | 1,50 | down |
| 6128888 | 7292953 | 1603696 | invasion inhibitory protein 45                      | Iip45  | 298643 | 1,07 | up   |
| 6263762 | 7292953 | 1603702 | invasion inhibitory protein 45                      | Iip45  | 298643 | 2,01 | up   |
| 6361808 | 7292953 | 1603701 | invasion inhibitory protein 45                      | Iip45  | 298643 | 1,06 | up   |
| 6421071 | 7292953 | 1603694 | invasion inhibitory protein 45                      | Iip45  | 298643 | 1,10 | down |
| 6434521 | 7292953 | 1603695 | invasion inhibitory protein 45                      | Iip45  | 298643 | 1,13 | up   |
| 6602596 | 7292953 | 1603699 | invasion inhibitory protein 45                      | Iip45  | 298643 | 1,03 | down |
| 5658043 | 7374362 | 1807634 | IQ motif and Sec7 domain 2                          | Iqsec2 | 317433 | 1,31 | down |
| 5762884 | 7374362 | 1807641 | IQ motif and Sec7 domain 2                          | Iqsec2 | 317433 | 1,58 | down |
| 5813672 | 7374362 | 1807637 | IQ motif and Sec7 domain 2                          | Iqsec2 | 317433 | 1,37 | down |
| 5819332 | 7374362 | 1807612 | IQ motif and Sec7 domain 2                          | Iqsec2 | 317433 | 1,34 | up   |
| 5830957 | 7374362 | 1807631 | IQ motif and Sec7 domain 2                          | Iqsec2 | 317433 | 1,04 | down |
| 5854607 | 7374362 | 1807626 | IQ motif and Sec7 domain 2                          | Iqsec2 | 317433 | 1,13 | down |
| 5875642 | 7374362 | 1807629 | IQ motif and Sec7 domain 2                          | Iqsec2 | 317433 | 1,14 | down |
| 5924733 | 7374362 | 1807616 | IQ motif and Sec7 domain 2                          | Iqsec2 | 317433 | 1,22 | up   |
| 5934333 | 7374362 | 1807612 | IQ motif and Sec7 domain 2                          | Iqsec2 | 317433 | 1,43 | up   |
| 6006651 | 7374362 | 1807640 | IQ motif and Sec7 domain 2                          | Iqsec2 | 317433 | 1,09 | up   |
| 6012591 | 7374362 | 1807639 | IQ motif and Sec7 domain 2                          | Iqsec2 | 317433 | 1,14 | down |
| 6013890 | 7374362 | 1807625 | IQ motif and Sec7 domain 2                          | Iqsec2 | 317433 | 1,08 | down |
| 6024080 | 7374362 | 1807635 | IQ motif and Sec7 domain 2                          | Iqsec2 | 317433 | 1,73 | up   |
| 6035114 | 7374362 | 1807633 | IQ motif and Sec7 domain 2                          | Iqsec2 | 317433 | 1,68 | up   |
| 6080086 | 7374362 | 1807626 | IQ motif and Sec7 domain 2                          | Iqsec2 | 317433 | 1,90 | down |
| 6087716 | 7374362 | 1807632 | IQ motif and Sec7 domain 2                          | Iqsec2 | 317433 | 1,02 | down |
| 6363235 | 7374362 | 1807628 | IQ motif and Sec7 domain 2                          | Iqsec2 | 317433 | 1,07 | down |
| 6438553 | 7374362 | 1807627 | IQ motif and Sec7 domain 2                          | Iqsec2 | 317433 | 1,45 | up   |
| 6454465 | 7374362 | 1807639 | IQ motif and Sec7 domain 2                          | Iqsec2 | 317433 | 1,05 | up   |
| 6479657 | 7374362 | 1807641 | IQ motif and Sec7 domain 2                          | Iqsec2 | 317433 | 1,08 | down |
| 6505558 | 7374362 | 1807627 | IQ motif and Sec7 domain 2                          | Iqsec2 | 317433 | 1,07 | down |
| 6564086 | 7374362 | 1807630 | IQ motif and Sec7 domain 2                          | Iqsec2 | 317433 | 1,05 | down |

|         |         |         |                                                 |        |        |      |      |
|---------|---------|---------|-------------------------------------------------|--------|--------|------|------|
| 6639162 | 7374362 | 1807638 | IQ motif and Sec7 domain 2                      | Iqsec2 | 317433 | 2,00 | down |
| 6695961 | 7374362 | 1807627 | IQ motif and Sec7 domain 2                      | Iqsec2 | 317433 | 1,10 | up   |
| 6705180 | 7374362 | 1807641 | IQ motif and Sec7 domain 2                      | Iqsec2 | 317433 | 1,07 | up   |
| 6733661 | 7374362 | 1807626 | IQ motif and Sec7 domain 2                      | Iqsec2 | 317433 | 1,17 | up   |
| 5818200 | 7113483 | 1161023 | IQ motif and WD repeats 1                       | Iqwd1  | 289181 | 1,41 | up   |
| 6018669 | 7113483 | 1161009 | IQ motif and WD repeats 1                       | Iqwd1  | 289181 | 1,32 | up   |
| 5747482 | 7102474 | 1133738 | IQ motif containing D                           | Iqcd   | 498184 | 1,01 | down |
| 5883969 | 7102474 | 1133741 | IQ motif containing D                           | Iqcd   | 498184 | 1,33 | up   |
| 6061356 | 7102474 | 1133742 | IQ motif containing D                           | Iqcd   | 498184 | 2,35 | down |
| 6277765 | 7102474 | 1133740 | IQ motif containing D                           | Iqcd   | 498184 | 1,55 | up   |
| 6304690 | 7102474 | 1133743 | IQ motif containing D                           | Iqcd   | 498184 | 1,05 | down |
| 6313653 | 7102474 | 1133743 | IQ motif containing D                           | Iqcd   | 498184 | 1,06 | down |
| 6459388 | 7102474 | 1133739 | IQ motif containing D                           | Iqcd   | 498184 | 1,06 | down |
| 6546503 | 7102474 | 1133744 | IQ motif containing D                           | Iqcd   | 498184 | 1,03 | up   |
| 6278393 | 7196029 | 1365601 | IQ motif containing GTPase activating protein 3 | Iqgap3 | 310621 | 1,26 | down |
| 5755581 | 7179143 | 1322793 | iroquois homeobox 3                             | Irx3   | 307721 | 1,20 | down |
| 5875002 | 7179143 | 1322791 | iroquois homeobox 3                             | Irx3   | 307721 | 1,35 | up   |
| 6173782 | 7179143 | 1322791 | iroquois homeobox 3                             | Irx3   | 307721 | 1,88 | up   |
| 6193066 | 7179143 | 1322791 | iroquois homeobox 3                             | Irx3   | 307721 | 1,28 | up   |
| 6400232 | 7179143 | 1322793 | iroquois homeobox 3                             | Irx3   | 307721 | 1,47 | down |
| 6515234 | 7179143 | 1322791 | iroquois homeobox 3                             | Irx3   | 307721 | 1,65 | up   |
| 6619141 | 7179143 | 1322792 | iroquois homeobox 3                             | Irx3   | 307721 | 1,53 | down |
| 5636884 | 7245570 | 1486668 | jagged 1                                        | Jag1   | 29146  | 1,13 | down |
| 5666385 | 7245570 | 1486661 | jagged 1                                        | Jag1   | 29146  | 1,01 | up   |
| 5707236 | 7245570 | 1486667 | jagged 1                                        | Jag1   | 29146  | 1,16 | up   |
| 5787564 | 7245570 | 1486665 | jagged 1                                        | Jag1   | 29146  | 1,54 | down |
| 5806811 | 7245570 | 1486662 | jagged 1                                        | Jag1   | 29146  | 1,78 | down |
| 5806825 | 7245570 | 1486657 | jagged 1                                        | Jag1   | 29146  | 1,16 | up   |
| 5850944 | 7245570 | 1486651 | jagged 1                                        | Jag1   | 29146  | 1,51 | up   |
| 5909678 | 7245570 | 1486649 | jagged 1                                        | Jag1   | 29146  | 1,31 | up   |
| 5955201 | 7245570 | 1486653 | jagged 1                                        | Jag1   | 29146  | 1,36 | down |
| 5970277 | 7245570 | 1486663 | jagged 1                                        | Jag1   | 29146  | 1,49 | down |
| 6116459 | 7245570 | 1486652 | jagged 1                                        | Jag1   | 29146  | 1,63 | up   |
| 6141231 | 7245570 | 1486646 | jagged 1                                        | Jag1   | 29146  | 1,53 | down |
| 6177332 | 7245570 | 1486647 | jagged 1                                        | Jag1   | 29146  | 1,49 | up   |
| 6267280 | 7245570 | 1486666 | jagged 1                                        | Jag1   | 29146  | 1,20 | down |
| 6354571 | 7245570 | 1486656 | jagged 1                                        | Jag1   | 29146  | 1,18 | down |
| 6356596 | 7245570 | 1486670 | jagged 1                                        | Jag1   | 29146  | 2,82 | down |
| 6410979 | 7245570 | 1486654 | jagged 1                                        | Jag1   | 29146  | 1,21 | up   |
| 6447500 | 7245570 | 1486664 | jagged 1                                        | Jag1   | 29146  | 1,21 | up   |
| 6462119 | 7245570 | 1486660 | jagged 1                                        | Jag1   | 29146  | 1,02 | up   |
| 6470321 | 7245570 | 1486645 | jagged 1                                        | Jag1   | 29146  | 1,38 | down |
| 6491950 | 7245570 | 1486648 | jagged 1                                        | Jag1   | 29146  | 1,03 | up   |
| 6542016 | 7245570 | 1486665 | jagged 1                                        | Jag1   | 29146  | 1,44 | down |
| 6559894 | 7245570 | 1486659 | jagged 1                                        | Jag1   | 29146  | 1,01 | down |
| 6637479 | 7245570 | 1486650 | jagged 1                                        | Jag1   | 29146  | 1,53 | up   |
| 6650836 | 7245570 | 1486669 | jagged 1                                        | Jag1   | 29146  | 1,25 | up   |
| 6712960 | 7245570 | 1486655 | jagged 1                                        | Jag1   | 29146  | 1,27 | up   |
| 6731583 | 7245570 | 1486658 | jagged 1                                        | Jag1   | 29146  | 1,80 | up   |
| 5664257 | 7041050 | 988033  | Janus kinase 2                                  | Jak2   | 24514  | 1,00 | up   |
| 5671561 | 7041050 | 988054  | Janus kinase 2                                  | Jak2   | 24514  | 1,04 | down |
| 5692305 | 7041050 | 988031  | Janus kinase 2                                  | Jak2   | 24514  | 1,22 | down |
| 5704886 | 7041050 | 988041  | Janus kinase 2                                  | Jak2   | 24514  | 1,10 | down |
| 5719932 | 7041050 | 988039  | Janus kinase 2                                  | Jak2   | 24514  | 1,42 | up   |
| 5739756 | 7041050 | 988038  | Janus kinase 2                                  | Jak2   | 24514  | 1,28 | up   |
| 5829573 | 7041050 | 988042  | Janus kinase 2                                  | Jak2   | 24514  | 1,15 | up   |

|         |         |         |                                     |      |        |      |      |
|---------|---------|---------|-------------------------------------|------|--------|------|------|
| 5977605 | 7041050 | 988052  | Janus kinase 2                      | Jak2 | 24514  | 1,20 | up   |
| 6104975 | 7041050 | 988030  | Janus kinase 2                      | Jak2 | 24514  | 1,62 | up   |
| 6214771 | 7041050 | 988044  | Janus kinase 2                      | Jak2 | 24514  | 1,27 | up   |
| 6236523 | 7041050 | 988034  | Janus kinase 2                      | Jak2 | 24514  | 1,01 | up   |
| 6266362 | 7041050 | 988032  | Janus kinase 2                      | Jak2 | 24514  | 1,14 | down |
| 6280783 | 7041050 | 988050  | Janus kinase 2                      | Jak2 | 24514  | 1,06 | up   |
| 6353515 | 7041050 | 988040  | Janus kinase 2                      | Jak2 | 24514  | 3,51 | down |
| 6386101 | 7041050 | 988046  | Janus kinase 2                      | Jak2 | 24514  | 1,13 | down |
| 6392550 | 7041050 | 988029  | Janus kinase 2                      | Jak2 | 24514  | 1,35 | down |
| 6393539 | 7041050 | 988033  | Janus kinase 2                      | Jak2 | 24514  | 1,21 | down |
| 6463579 | 7041050 | 988035  | Janus kinase 2                      | Jak2 | 24514  | 1,04 | up   |
| 6472971 | 7041050 | 988047  | Janus kinase 2                      | Jak2 | 24514  | 1,05 | up   |
| 6531237 | 7041050 | 988043  | Janus kinase 2                      | Jak2 | 24514  | 1,17 | down |
| 6532144 | 7041050 | 988036  | Janus kinase 2                      | Jak2 | 24514  | 1,29 | up   |
| 6564338 | 7041050 | 988055  | Janus kinase 2                      | Jak2 | 24514  | 1,06 | down |
| 6592389 | 7041050 | 988045  | Janus kinase 2                      | Jak2 | 24514  | 1,27 | up   |
| 6605198 | 7041050 | 988037  | Janus kinase 2                      | Jak2 | 24514  | 2,26 | down |
| 6609269 | 7041050 | 988054  | Janus kinase 2                      | Jak2 | 24514  | 1,01 | up   |
| 6658532 | 7041050 | 988053  | Janus kinase 2                      | Jak2 | 24514  | 1,16 | down |
| 6681926 | 7041050 | 988051  | Janus kinase 2                      | Jak2 | 24514  | 1,01 | up   |
| 6689868 | 7041050 | 988049  | Janus kinase 2                      | Jak2 | 24514  | 1,10 | up   |
| 6729078 | 7041050 | 988048  | Janus kinase 2                      | Jak2 | 24514  | 1,26 | up   |
| 6737860 | 7041050 | 988040  | Janus kinase 2                      | Jak2 | 24514  | 1,03 | up   |
| 5651373 | 7144092 | 1236239 | Janus kinase 3                      | Jak3 | 25326  | 1,30 | down |
| 5682826 | 7144092 | 1236220 | Janus kinase 3                      | Jak3 | 25326  | 1,34 | down |
| 5701891 | 7144092 | 1236229 | Janus kinase 3                      | Jak3 | 25326  | 1,59 | down |
| 5720559 | 7144092 | 1236231 | Janus kinase 3                      | Jak3 | 25326  | 1,06 | up   |
| 5772728 | 7144092 | 1236219 | Janus kinase 3                      | Jak3 | 25326  | 1,33 | up   |
| 5799336 | 7144092 | 1236217 | Janus kinase 3                      | Jak3 | 25326  | 1,22 | down |
| 5827634 | 7144092 | 1236225 | Janus kinase 3                      | Jak3 | 25326  | 1,32 | up   |
| 5928979 | 7144092 | 1236221 | Janus kinase 3                      | Jak3 | 25326  | 1,04 | up   |
| 5947322 | 7144092 | 1236232 | Janus kinase 3                      | Jak3 | 25326  | 1,23 | up   |
| 5956418 | 7144092 | 1236236 | Janus kinase 3                      | Jak3 | 25326  | 1,05 | down |
| 6003725 | 7144092 | 1236221 | Janus kinase 3                      | Jak3 | 25326  | 1,44 | down |
| 6080417 | 7144092 | 1236230 | Janus kinase 3                      | Jak3 | 25326  | 1,06 | up   |
| 6125394 | 7144092 | 1236218 | Janus kinase 3                      | Jak3 | 25326  | 1,09 | down |
| 6126306 | 7144092 | 1236234 | Janus kinase 3                      | Jak3 | 25326  | 1,04 | down |
| 6126458 | 7144092 | 1236237 | Janus kinase 3                      | Jak3 | 25326  | 1,31 | up   |
| 6155164 | 7144092 | 1236238 | Janus kinase 3                      | Jak3 | 25326  | 1,71 | down |
| 6165794 | 7144092 | 1236222 | Janus kinase 3                      | Jak3 | 25326  | 1,09 | up   |
| 6200398 | 7144092 | 1236223 | Janus kinase 3                      | Jak3 | 25326  | 1,22 | up   |
| 6212356 | 7144092 | 1236224 | Janus kinase 3                      | Jak3 | 25326  | 1,57 | up   |
| 6226964 | 7144092 | 1236226 | Janus kinase 3                      | Jak3 | 25326  | 1,36 | up   |
| 6277601 | 7144092 | 1236235 | Janus kinase 3                      | Jak3 | 25326  | 1,11 | up   |
| 6291674 | 7144092 | 1236228 | Janus kinase 3                      | Jak3 | 25326  | 1,05 | up   |
| 6427837 | 7144092 | 1236233 | Janus kinase 3                      | Jak3 | 25326  | 1,04 | up   |
| 6535913 | 7144092 | 1236240 | Janus kinase 3                      | Jak3 | 25326  | 1,59 | down |
| 6582585 | 7144092 | 1236227 | Janus kinase 3                      | Jak3 | 25326  | 1,30 | up   |
| 6592653 | 7144092 | 1236234 | Janus kinase 3                      | Jak3 | 25326  | 1,27 | down |
| 5630138 | 7328920 | 1693020 | jerky homolog (mouse)               | Jrk  | 315073 | 1,37 | up   |
| 6209697 | 7328920 | 1693020 | jerky homolog (mouse)               | Jrk  | 315073 | 1,27 | down |
| 5822127 | 7138029 | 1221200 | jub, ajuba homolog (Xenopus laevis) | Jub  | 85265  | 1,27 | down |
| 5905723 | 7138029 | 1221198 | jub, ajuba homolog (Xenopus laevis) | Jub  | 85265  | 1,42 | up   |
| 6016382 | 7138029 | 1221201 | jub, ajuba homolog (Xenopus laevis) | Jub  | 85265  | 1,09 | up   |
| 6079282 | 7138029 | 1221203 | jub, ajuba homolog (Xenopus laevis) | Jub  | 85265  | 1,12 | up   |
| 6274871 | 7138029 | 1221203 | jub, ajuba homolog (Xenopus laevis) | Jub  | 85265  | 2,38 | down |



|         |         |         |                                                    |         |        |      |      |
|---------|---------|---------|----------------------------------------------------|---------|--------|------|------|
| 6279965 | 7138029 | 1221204 | jub, ajuba homolog ( <i>Xenopus laevis</i> )       | Jub     | 85265  | 1,19 | up   |
| 6417653 | 7138029 | 1221202 | jub, ajuba homolog ( <i>Xenopus laevis</i> )       | Jub     | 85265  | 1,10 | down |
| 6488531 | 7138029 | 1221204 | jub, ajuba homolog ( <i>Xenopus laevis</i> )       | Jub     | 85265  | 1,18 | down |
| 6525583 | 7138029 | 1221203 | jub, ajuba homolog ( <i>Xenopus laevis</i> )       | Jub     | 85265  | 1,08 | down |
| 6609134 | 7138029 | 1221195 | jub, ajuba homolog ( <i>Xenopus laevis</i> )       | Jub     | 85265  | 1,05 | up   |
| 6623924 | 7138029 | 1221199 | jub, ajuba homolog ( <i>Xenopus laevis</i> )       | Jub     | 85265  | 1,07 | up   |
| 6710201 | 7138029 | 1221196 | jub, ajuba homolog ( <i>Xenopus laevis</i> )       | Jub     | 85265  | 1,04 | up   |
| 6722353 | 7138029 | 1221196 | jub, ajuba homolog ( <i>Xenopus laevis</i> )       | Jub     | 85265  | 1,05 | up   |
| 6730126 | 7138029 | 1221197 | jub, ajuba homolog ( <i>Xenopus laevis</i> )       | Jub     | 85265  | 1,14 | down |
| 5697617 | 7276231 | 1563086 | jumonji domain containing 2C                       | Jmjd2c  | 298144 | 2,02 | up   |
| 5804804 | 7276231 | 1563088 | jumonji domain containing 2C                       | Jmjd2c  | 298144 | 1,15 | down |
| 6053833 | 7276231 | 1563095 | jumonji domain containing 2C                       | Jmjd2c  | 298144 | 1,06 | down |
| 6258028 | 7276231 | 1563094 | jumonji domain containing 2C                       | Jmjd2c  | 298144 | 1,43 | up   |
| 6267866 | 7276231 | 1563095 | jumonji domain containing 2C                       | Jmjd2c  | 298144 | 1,17 | down |
| 6331293 | 7276231 | 1563087 | jumonji domain containing 2C                       | Jmjd2c  | 298144 | 1,01 | up   |
| 6394694 | 7276231 | 1563089 | jumonji domain containing 2C                       | Jmjd2c  | 298144 | 1,05 | down |
| 6436726 | 7276231 | 1563090 | jumonji domain containing 2C                       | Jmjd2c  | 298144 | 1,14 | up   |
| 5932094 | 7068143 | 1051291 | jumonji domain containing 4                        | Jmjd4   | 287359 | 1,07 | up   |
| 6044786 | 7068143 | 1051295 | jumonji domain containing 4                        | Jmjd4   | 287359 | 1,31 | down |
| 6222524 | 7068143 | 1051293 | jumonji domain containing 4                        | Jmjd4   | 287359 | 1,54 | up   |
| 6244000 | 7068143 | 1051294 | jumonji domain containing 4                        | Jmjd4   | 287359 | 1,23 | down |
| 6254317 | 7068143 | 1051290 | jumonji domain containing 4                        | Jmjd4   | 287359 | 2,03 | down |
| 6327710 | 7068143 | 1051293 | jumonji domain containing 4                        | Jmjd4   | 287359 | 1,14 | up   |
| 6408041 | 7068143 | 1051292 | jumonji domain containing 4                        | Jmjd4   | 287359 | 1,90 | up   |
| 6445737 | 7068143 | 1051295 | jumonji domain containing 4                        | Jmjd4   | 287359 | 2,22 | down |
| 5629121 | 7257963 | 1517671 | jumonji, AT rich interactive domain 1A (Rbp2 like) | Jarid1a | 312678 | 1,06 | up   |
| 5712892 | 7257963 | 1517663 | jumonji, AT rich interactive domain 1A (Rbp2 like) | Jarid1a | 312678 | 1,06 | down |
| 5827573 | 7257963 | 1517669 | jumonji, AT rich interactive domain 1A (Rbp2 like) | Jarid1a | 312678 | 1,15 | up   |
| 5829433 | 7257963 | 1517664 | jumonji, AT rich interactive domain 1A (Rbp2 like) | Jarid1a | 312678 | 2,04 | down |
| 5839068 | 7257963 | 1517660 | jumonji, AT rich interactive domain 1A (Rbp2 like) | Jarid1a | 312678 | 1,00 | down |
| 5885906 | 7257963 | 1517665 | jumonji, AT rich interactive domain 1A (Rbp2 like) | Jarid1a | 312678 | 1,13 | up   |
| 5896358 | 7257963 | 1517679 | jumonji, AT rich interactive domain 1A (Rbp2 like) | Jarid1a | 312678 | 1,01 | up   |
| 5931307 | 7257963 | 1517659 | jumonji, AT rich interactive domain 1A (Rbp2 like) | Jarid1a | 312678 | 1,10 | up   |
| 5934710 | 7257963 | 1517681 | jumonji, AT rich interactive domain 1A (Rbp2 like) | Jarid1a | 312678 | 1,25 | up   |
| 6024049 | 7257963 | 1517673 | jumonji, AT rich interactive domain 1A (Rbp2 like) | Jarid1a | 312678 | 1,18 | up   |
| 6071779 | 7257963 | 1517672 | jumonji, AT rich interactive domain 1A (Rbp2 like) | Jarid1a | 312678 | 1,11 | up   |
| 6110208 | 7257963 | 1517674 | jumonji, AT rich interactive domain 1A (Rbp2 like) | Jarid1a | 312678 | 1,05 | down |
| 6136899 | 7257963 | 1517678 | jumonji, AT rich interactive domain 1A (Rbp2 like) | Jarid1a | 312678 | 1,05 | down |
| 6212211 | 7257963 | 1517671 | jumonji, AT rich interactive domain 1A (Rbp2 like) | Jarid1a | 312678 | 1,15 | down |
| 6249751 | 7257963 | 1517661 | jumonji, AT rich interactive domain 1A (Rbp2 like) | Jarid1a | 312678 | 1,08 | down |
| 6274426 | 7257963 | 1517673 | jumonji, AT rich interactive domain 1A (Rbp2 like) | Jarid1a | 312678 | 1,24 | down |
| 6401045 | 7257963 | 1517682 | jumonji, AT rich interactive domain 1A (Rbp2 like) | Jarid1a | 312678 | 1,01 | up   |
| 6425072 | 7257963 | 1517662 | jumonji, AT rich interactive domain 1A (Rbp2 like) | Jarid1a | 312678 | 1,08 | down |
| 6460907 | 7257963 | 1517670 | jumonji, AT rich interactive domain 1A (Rbp2 like) | Jarid1a | 312678 | 1,11 | up   |
| 6543275 | 7257963 | 1517675 | jumonji, AT rich interactive domain 1A (Rbp2 like) | Jarid1a | 312678 | 1,24 | up   |
| 6544586 | 7257963 | 1517680 | jumonji, AT rich interactive domain 1A (Rbp2 like) | Jarid1a | 312678 | 1,25 | down |
| 6564073 | 7257963 | 1517659 | jumonji, AT rich interactive domain 1A (Rbp2 like) | Jarid1a | 312678 | 1,08 | down |
| 6568991 | 7257963 | 1517668 | jumonji, AT rich interactive domain 1A (Rbp2 like) | Jarid1a | 312678 | 1,09 | down |
| 6609393 | 7257963 | 1517676 | jumonji, AT rich interactive domain 1A (Rbp2 like) | Jarid1a | 312678 | 1,17 | down |
| 6613860 | 7257963 | 1517681 | jumonji, AT rich interactive domain 1A (Rbp2 like) | Jarid1a | 312678 | 1,22 | up   |
| 6638736 | 7257963 | 1517667 | jumonji, AT rich interactive domain 1A (Rbp2 like) | Jarid1a | 312678 | 1,02 | down |
| 6645727 | 7257963 | 1517666 | jumonji, AT rich interactive domain 1A (Rbp2 like) | Jarid1a | 312678 | 1,01 | up   |
| 6677608 | 7257963 | 1517659 | jumonji, AT rich interactive domain 1A (Rbp2 like) | Jarid1a | 312678 | 1,42 | up   |
| 6678777 | 7257963 | 1517677 | jumonji, AT rich interactive domain 1A (Rbp2 like) | Jarid1a | 312678 | 1,23 | down |
| 5762249 | 7288744 | 1593690 | Jun oncogene                                       | Jun     | 24516  | 1,01 | up   |
| 5957840 | 7288744 | 1593690 | Jun oncogene                                       | Jun     | 24516  | 1,17 | up   |

|         |         |         |                        |       |        |      |      |
|---------|---------|---------|------------------------|-------|--------|------|------|
| 6027652 | 7288744 | 1593690 | Jun oncogene           | Jun   | 24516  | 1,08 | down |
| 6155367 | 7288744 | 1593690 | Jun oncogene           | Jun   | 24516  | 1,20 | up   |
| 6285488 | 7288744 | 1593689 | Jun oncogene           | Jun   | 24516  | 1,06 | down |
| 6342333 | 7288744 | 1593690 | Jun oncogene           | Jun   | 24516  | 1,50 | down |
| 6485592 | 7288744 | 1593689 | Jun oncogene           | Jun   | 24516  | 1,24 | down |
| 6685920 | 7288744 | 1593689 | Jun oncogene           | Jun   | 24516  | 1,24 | up   |
| 6725675 | 7288744 | 1593689 | Jun oncogene           | Jun   | 24516  | 2,08 | down |
| 5621996 | 7271643 | 1551699 | junctophilin 1         | Jph1  | 297748 | 1,03 | down |
| 5800334 | 7271643 | 1551694 | junctophilin 1         | Jph1  | 297748 | 1,03 | up   |
| 5830215 | 7271643 | 1551679 | junctophilin 1         | Jph1  | 297748 | 3,22 | down |
| 6152945 | 7271643 | 1551697 | junctophilin 1         | Jph1  | 297748 | 1,03 | down |
| 6183615 | 7271643 | 1551697 | junctophilin 1         | Jph1  | 297748 | 1,02 | up   |
| 6195359 | 7271643 | 1551681 | junctophilin 1         | Jph1  | 297748 | 1,53 | down |
| 6687295 | 7271643 | 1551681 | junctophilin 1         | Jph1  | 297748 | 1,18 | down |
| 6717292 | 7271643 | 1551679 | junctophilin 1         | Jph1  | 297748 | 1,18 | up   |
| 5633555 | 7088723 | 1100139 | kalirin, RhoGEF kinase | Kalrn | 84009  | 1,16 | up   |
| 5646169 | 7088723 | 1100109 | kalirin, RhoGEF kinase | Kalrn | 84009  | 1,46 | up   |
| 5664880 | 7088723 | 1100113 | kalirin, RhoGEF kinase | Kalrn | 84009  | 1,19 | down |
| 5696280 | 7088723 | 1100105 | kalirin, RhoGEF kinase | Kalrn | 84009  | 1,20 | up   |
| 5704085 | 7088723 | 1100113 | kalirin, RhoGEF kinase | Kalrn | 84009  | 1,59 | down |
| 5714699 | 7088723 | 1100138 | kalirin, RhoGEF kinase | Kalrn | 84009  | 1,15 | up   |
| 5722998 | 7088723 | 1100150 | kalirin, RhoGEF kinase | Kalrn | 84009  | 1,71 | down |
| 5729118 | 7088723 | 1100110 | kalirin, RhoGEF kinase | Kalrn | 84009  | 1,37 | up   |
| 5752480 | 7088723 | 1100154 | kalirin, RhoGEF kinase | Kalrn | 84009  | 1,17 | up   |
| 5839972 | 7088723 | 1100157 | kalirin, RhoGEF kinase | Kalrn | 84009  | 1,21 | up   |
| 5866295 | 7088723 | 1100112 | kalirin, RhoGEF kinase | Kalrn | 84009  | 1,24 | up   |
| 5880103 | 7088723 | 1100118 | kalirin, RhoGEF kinase | Kalrn | 84009  | 1,01 | up   |
| 5895761 | 7088723 | 1100146 | kalirin, RhoGEF kinase | Kalrn | 84009  | 1,60 | down |
| 5916443 | 7088723 | 1100143 | kalirin, RhoGEF kinase | Kalrn | 84009  | 1,48 | down |
| 5927850 | 7088723 | 1100113 | kalirin, RhoGEF kinase | Kalrn | 84009  | 1,15 | up   |
| 5930679 | 7088723 | 1100156 | kalirin, RhoGEF kinase | Kalrn | 84009  | 1,10 | down |
| 5944628 | 7088723 | 1100144 | kalirin, RhoGEF kinase | Kalrn | 84009  | 1,15 | up   |
| 5947745 | 7088723 | 1100124 | kalirin, RhoGEF kinase | Kalrn | 84009  | 1,54 | down |
| 5960067 | 7088723 | 1100129 | kalirin, RhoGEF kinase | Kalrn | 84009  | 1,17 | down |
| 5961792 | 7088723 | 1100104 | kalirin, RhoGEF kinase | Kalrn | 84009  | 1,07 | down |
| 5981616 | 7088723 | 1100158 | kalirin, RhoGEF kinase | Kalrn | 84009  | 1,01 | up   |
| 5985950 | 7088723 | 1100125 | kalirin, RhoGEF kinase | Kalrn | 84009  | 1,77 | up   |
| 6020532 | 7088723 | 1100136 | kalirin, RhoGEF kinase | Kalrn | 84009  | 1,25 | up   |
| 6023101 | 7088723 | 1100116 | kalirin, RhoGEF kinase | Kalrn | 84009  | 1,91 | up   |
| 6028317 | 7088723 | 1100147 | kalirin, RhoGEF kinase | Kalrn | 84009  | 1,07 | up   |
| 6030955 | 7088723 | 1100163 | kalirin, RhoGEF kinase | Kalrn | 84009  | 1,35 | down |
| 6037013 | 7088723 | 1100108 | kalirin, RhoGEF kinase | Kalrn | 84009  | 1,30 | up   |
| 6054444 | 7088723 | 1100111 | kalirin, RhoGEF kinase | Kalrn | 84009  | 1,36 | down |
| 6061362 | 7088723 | 1100149 | kalirin, RhoGEF kinase | Kalrn | 84009  | 1,11 | down |
| 6065189 | 7088723 | 1100156 | kalirin, RhoGEF kinase | Kalrn | 84009  | 1,04 | up   |
| 6075400 | 7088723 | 1100141 | kalirin, RhoGEF kinase | Kalrn | 84009  | 1,08 | up   |
| 6079746 | 7088723 | 1100132 | kalirin, RhoGEF kinase | Kalrn | 84009  | 1,61 | down |
| 6102991 | 7088723 | 1100162 | kalirin, RhoGEF kinase | Kalrn | 84009  | 1,01 | down |
| 6118258 | 7088723 | 1100130 | kalirin, RhoGEF kinase | Kalrn | 84009  | 1,58 | up   |
| 6120824 | 7088723 | 1100142 | kalirin, RhoGEF kinase | Kalrn | 84009  | 2,08 | down |
| 6137803 | 7088723 | 1100106 | kalirin, RhoGEF kinase | Kalrn | 84009  | 1,51 | up   |
| 6160173 | 7088723 | 1100133 | kalirin, RhoGEF kinase | Kalrn | 84009  | 1,15 | up   |
| 6218217 | 7088723 | 1100128 | kalirin, RhoGEF kinase | Kalrn | 84009  | 1,09 | down |
| 6222804 | 7088723 | 1100103 | kalirin, RhoGEF kinase | Kalrn | 84009  | 1,43 | down |
| 6226641 | 7088723 | 1100155 | kalirin, RhoGEF kinase | Kalrn | 84009  | 1,00 | down |
| 6231123 | 7088723 | 1100107 | kalirin, RhoGEF kinase | Kalrn | 84009  | 1,17 | up   |

|         |         |         |                                        |                                            |        |      |      |
|---------|---------|---------|----------------------------------------|--------------------------------------------|--------|------|------|
| 6268999 | 7088723 | 1100151 | kalirin, RhoGEF kinase                 | Kalrn                                      | 84009  | 1,40 | down |
| 6308389 | 7088723 | 1100117 | kalirin, RhoGEF kinase                 | Kalrn                                      | 84009  | 1,34 | up   |
| 6320809 | 7088723 | 1100137 | kalirin, RhoGEF kinase                 | Kalrn                                      | 84009  | 1,07 | down |
| 6342491 | 7088723 | 1100153 | kalirin, RhoGEF kinase                 | Kalrn                                      | 84009  | 1,16 | down |
| 6351786 | 7088723 | 1100126 | kalirin, RhoGEF kinase                 | Kalrn                                      | 84009  | 1,71 | down |
| 6380558 | 7088723 | 1100113 | kalirin, RhoGEF kinase                 | Kalrn                                      | 84009  | 1,18 | up   |
| 6384866 | 7088723 | 1100152 | kalirin, RhoGEF kinase                 | Kalrn                                      | 84009  | 1,05 | up   |
| 6384961 | 7088723 | 1100114 | kalirin, RhoGEF kinase                 | Kalrn                                      | 84009  | 1,11 | up   |
| 6385663 | 7088723 | 1100115 | kalirin, RhoGEF kinase                 | Kalrn                                      | 84009  | 1,08 | down |
| 6390854 | 7088723 | 1100112 | kalirin, RhoGEF kinase                 | Kalrn                                      | 84009  | 1,03 | up   |
| 6426486 | 7088723 | 1100161 | kalirin, RhoGEF kinase                 | Kalrn                                      | 84009  | 1,71 | up   |
| 6451782 | 7088723 | 1100102 | kalirin, RhoGEF kinase                 | Kalrn                                      | 84009  | 1,95 | down |
| 6477403 | 7088723 | 1100160 | kalirin, RhoGEF kinase                 | Kalrn                                      | 84009  | 1,11 | down |
| 6483252 | 7088723 | 1100119 | kalirin, RhoGEF kinase                 | Kalrn                                      | 84009  | 1,13 | up   |
| 6492604 | 7088723 | 1100148 | kalirin, RhoGEF kinase                 | Kalrn                                      | 84009  | 1,39 | up   |
| 6497618 | 7088723 | 1100120 | kalirin, RhoGEF kinase                 | Kalrn                                      | 84009  | 1,09 | up   |
| 6497934 | 7088723 | 1100122 | kalirin, RhoGEF kinase                 | Kalrn                                      | 84009  | 1,40 | up   |
| 6507555 | 7088723 | 1100159 | kalirin, RhoGEF kinase                 | Kalrn                                      | 84009  | 1,16 | down |
| 6537395 | 7088723 | 1100112 | kalirin, RhoGEF kinase                 | Kalrn                                      | 84009  | 1,16 | down |
| 6561755 | 7088723 | 1100127 | kalirin, RhoGEF kinase                 | Kalrn                                      | 84009  | 1,26 | down |
| 6565569 | 7088723 | 1100134 | kalirin, RhoGEF kinase                 | Kalrn                                      | 84009  | 1,11 | down |
| 6582056 | 7088723 | 1100145 | kalirin, RhoGEF kinase                 | Kalrn                                      | 84009  | 1,37 | up   |
| 6620905 | 7088723 | 1100121 | kalirin, RhoGEF kinase                 | Kalrn                                      | 84009  | 1,13 | up   |
| 6621587 | 7088723 | 1100123 | kalirin, RhoGEF kinase                 | Kalrn                                      | 84009  | 1,14 | up   |
| 6630559 | 7088723 | 1100136 | kalirin, RhoGEF kinase                 | Kalrn                                      | 84009  | 1,19 | up   |
| 6649600 | 7088723 | 1100112 | kalirin, RhoGEF kinase                 | Kalrn                                      | 84009  | 1,36 | up   |
| 6663669 | 7088723 | 1100112 | kalirin, RhoGEF kinase                 | Kalrn                                      | 84009  | 1,09 | up   |
| 6680802 | 7088723 | 1100131 | kalirin, RhoGEF kinase                 | Kalrn                                      | 84009  | 1,36 | up   |
| 6694343 | 7088723 | 1100140 | kalirin, RhoGEF kinase                 | Kalrn                                      | 84009  | 1,18 | down |
| 6241373 | 7050641 | 1010961 | kallikrein /// tonin /// kallikrein 1  | ∩292861 /// Ton /// F861 /// 24841 /// 292 |        | 1,05 | down |
| 5684119 | 7031183 | 963238  | kallikrein related-peptidase 8         | Klk8                                       | 308565 | 1,11 | down |
| 5708132 | 7031183 | 963234  | kallikrein related-peptidase 8         | Klk8                                       | 308565 | 1,52 | down |
| 5741010 | 7031183 | 963235  | kallikrein related-peptidase 8         | Klk8                                       | 308565 | 1,13 | up   |
| 5883542 | 7031183 | 963240  | kallikrein related-peptidase 8         | Klk8                                       | 308565 | 1,34 | down |
| 6022803 | 7031183 | 963236  | kallikrein related-peptidase 8         | Klk8                                       | 308565 | 1,43 | down |
| 6099839 | 7031183 | 963235  | kallikrein related-peptidase 8         | Klk8                                       | 308565 | 1,18 | down |
| 6122031 | 7031183 | 963234  | kallikrein related-peptidase 8         | Klk8                                       | 308565 | 1,74 | down |
| 6548054 | 7031183 | 963234  | kallikrein related-peptidase 8         | Klk8                                       | 308565 | 2,78 | down |
| 6577256 | 7031183 | 963237  | kallikrein related-peptidase 8         | Klk8                                       | 308565 | 1,25 | down |
| 6741116 | 7031183 | 963239  | kallikrein related-peptidase 8         | Klk8                                       | 308565 | 1,24 | down |
| 5675930 | 7031183 | 963232  | kallikrein related-peptidase 9         | Klk9                                       | 292851 | 1,07 | up   |
| 5855726 | 7031183 | 963231  | kallikrein related-peptidase 9         | Klk9                                       | 292851 | 1,04 | up   |
| 5968279 | 7031183 | 963230  | kallikrein related-peptidase 9         | Klk9                                       | 292851 | 1,13 | down |
| 6003833 | 7031183 | 963233  | kallikrein related-peptidase 9         | Klk9                                       | 292851 | 1,10 | down |
| 6018649 | 7031183 | 963231  | kallikrein related-peptidase 9         | Klk9                                       | 292851 | 1,31 | up   |
| 6554802 | 7031183 | 963233  | kallikrein related-peptidase 9         | Klk9                                       | 292851 | 1,15 | up   |
| 6691107 | 7031183 | 963229  | kallikrein related-peptidase 9         | Klk9                                       | 292851 | 1,19 | up   |
| 5630864 | 7218847 | 1420190 | karyopherin alpha 5 (importin alpha 6) | Kpna5                                      | 294392 | 1,20 | up   |
| 5694034 | 7218847 | 1420185 | karyopherin alpha 5 (importin alpha 6) | Kpna5                                      | 294392 | 1,13 | down |
| 5915224 | 7218847 | 1420186 | karyopherin alpha 5 (importin alpha 6) | Kpna5                                      | 294392 | 1,32 | up   |
| 5915944 | 7218847 | 1420183 | karyopherin alpha 5 (importin alpha 6) | Kpna5                                      | 294392 | 1,29 | up   |
| 5916096 | 7218847 | 1420190 | karyopherin alpha 5 (importin alpha 6) | Kpna5                                      | 294392 | 1,10 | up   |
| 5937272 | 7218847 | 1420182 | karyopherin alpha 5 (importin alpha 6) | Kpna5                                      | 294392 | 1,27 | down |
| 5980928 | 7218847 | 1420191 | karyopherin alpha 5 (importin alpha 6) | Kpna5                                      | 294392 | 1,06 | up   |
| 6082644 | 7218847 | 1420187 | karyopherin alpha 5 (importin alpha 6) | Kpna5                                      | 294392 | 1,06 | down |
| 6206778 | 7218847 | 1420189 | karyopherin alpha 5 (importin alpha 6) | Kpna5                                      | 294392 | 1,19 | down |

|         |         |         |                                                                           |         |        |      |      |
|---------|---------|---------|---------------------------------------------------------------------------|---------|--------|------|------|
| 6381012 | 7218847 | 1420184 | karyopherin alpha 5 (importin alpha 6)                                    | Kpna5   | 294392 | 1,05 | down |
| 6501109 | 7218847 | 1420181 | karyopherin alpha 5 (importin alpha 6)                                    | Kpna5   | 294392 | 1,09 | up   |
| 6509833 | 7218847 | 1420188 | karyopherin alpha 5 (importin alpha 6)                                    | Kpna5   | 294392 | 1,27 | down |
| 6580640 | 7218847 | 1420179 | karyopherin alpha 5 (importin alpha 6)                                    | Kpna5   | 294392 | 2,23 | down |
| 6662072 | 7218847 | 1420180 | karyopherin alpha 5 (importin alpha 6)                                    | Kpna5   | 294392 | 1,08 | up   |
| 5619616 | 7024721 | 947621  | katanin p60 (ATPase-containing) subunit A1                                | Katna1  | 292464 | 1,17 | up   |
| 5763655 | 7024721 | 947626  | katanin p60 (ATPase-containing) subunit A1                                | Katna1  | 292464 | 1,19 | down |
| 5807452 | 7024721 | 947622  | katanin p60 (ATPase-containing) subunit A1                                | Katna1  | 292464 | 1,90 | down |
| 5903531 | 7024721 | 947628  | katanin p60 (ATPase-containing) subunit A1                                | Katna1  | 292464 | 1,05 | up   |
| 5999587 | 7024721 | 947621  | katanin p60 (ATPase-containing) subunit A1                                | Katna1  | 292464 | 2,49 | up   |
| 6056202 | 7024721 | 947624  | katanin p60 (ATPase-containing) subunit A1                                | Katna1  | 292464 | 2,91 | down |
| 6058202 | 7024721 | 947625  | katanin p60 (ATPase-containing) subunit A1                                | Katna1  | 292464 | 1,14 | up   |
| 6208751 | 7024721 | 947620  | katanin p60 (ATPase-containing) subunit A1                                | Katna1  | 292464 | 1,04 | up   |
| 6284413 | 7024721 | 947629  | katanin p60 (ATPase-containing) subunit A1                                | Katna1  | 292464 | 1,59 | down |
| 6579846 | 7024721 | 947623  | katanin p60 (ATPase-containing) subunit A1                                | Katna1  | 292464 | 1,16 | up   |
| 6639895 | 7024721 | 947627  | katanin p60 (ATPase-containing) subunit A1                                | Katna1  | 292464 | 1,16 | up   |
| 5733523 | 7182713 | 1332533 | katanin p80 (WD repeat containing) subunit B 1                            | Katnb1  | 291852 | 1,18 | down |
| 5745520 | 7182713 | 1332537 | katanin p80 (WD repeat containing) subunit B 1                            | Katnb1  | 291852 | 1,07 | down |
| 5791234 | 7182713 | 1332550 | katanin p80 (WD repeat containing) subunit B 1                            | Katnb1  | 291852 | 1,05 | up   |
| 5866152 | 7182713 | 1332538 | katanin p80 (WD repeat containing) subunit B 1                            | Katnb1  | 291852 | 1,04 | up   |
| 5897206 | 7182713 | 1332552 | katanin p80 (WD repeat containing) subunit B 1                            | Katnb1  | 291852 | 1,21 | up   |
| 6066062 | 7182713 | 1332540 | katanin p80 (WD repeat containing) subunit B 1                            | Katnb1  | 291852 | 1,44 | down |
| 6104191 | 7182713 | 1332544 | katanin p80 (WD repeat containing) subunit B 1                            | Katnb1  | 291852 | 2,37 | up   |
| 6112128 | 7182713 | 1332534 | katanin p80 (WD repeat containing) subunit B 1                            | Katnb1  | 291852 | 1,71 | down |
| 6186895 | 7182713 | 1332539 | katanin p80 (WD repeat containing) subunit B 1                            | Katnb1  | 291852 | 1,19 | down |
| 6207340 | 7182713 | 1332540 | katanin p80 (WD repeat containing) subunit B 1                            | Katnb1  | 291852 | 1,10 | down |
| 6252319 | 7182713 | 1332548 | katanin p80 (WD repeat containing) subunit B 1                            | Katnb1  | 291852 | 1,10 | up   |
| 6279631 | 7182713 | 1332539 | katanin p80 (WD repeat containing) subunit B 1                            | Katnb1  | 291852 | 1,26 | up   |
| 6311150 | 7182713 | 1332535 | katanin p80 (WD repeat containing) subunit B 1                            | Katnb1  | 291852 | 1,11 | down |
| 6364168 | 7182713 | 1332542 | katanin p80 (WD repeat containing) subunit B 1                            | Katnb1  | 291852 | 1,02 | down |
| 6383065 | 7182713 | 1332536 | katanin p80 (WD repeat containing) subunit B 1                            | Katnb1  | 291852 | 1,09 | down |
| 6508184 | 7182713 | 1332537 | katanin p80 (WD repeat containing) subunit B 1                            | Katnb1  | 291852 | 1,23 | up   |
| 6518926 | 7182713 | 1332541 | katanin p80 (WD repeat containing) subunit B 1                            | Katnb1  | 291852 | 1,18 | down |
| 6526477 | 7182713 | 1332543 | katanin p80 (WD repeat containing) subunit B 1                            | Katnb1  | 291852 | 1,35 | down |
| 6569828 | 7182713 | 1332545 | katanin p80 (WD repeat containing) subunit B 1                            | Katnb1  | 291852 | 1,58 | up   |
| 6706720 | 7182713 | 1332535 | katanin p80 (WD repeat containing) subunit B 1                            | Katnb1  | 291852 | 1,04 | up   |
| 5783104 | 7100396 | 1128587 | KDEL (Lys-Asp-Glu-Leu) endoplasmic reticulum protein retention receptor 2 | Kdelr2  | 304290 | 1,07 | up   |
| 5877345 | 7100396 | 1128587 | KDEL (Lys-Asp-Glu-Leu) endoplasmic reticulum protein retention receptor 2 | Kdelr2  | 304290 | 1,07 | up   |
| 6072339 | 7100396 | 1128585 | KDEL (Lys-Asp-Glu-Leu) endoplasmic reticulum protein retention receptor 2 | Kdelr2  | 304290 | 1,08 | up   |
| 6132190 | 7100396 | 1128586 | KDEL (Lys-Asp-Glu-Leu) endoplasmic reticulum protein retention receptor 2 | Kdelr2  | 304290 | 1,03 | up   |
| 6571901 | 7100396 | 1128587 | KDEL (Lys-Asp-Glu-Leu) endoplasmic reticulum protein retention receptor 2 | Kdelr2  | 304290 | 1,07 | down |
| 6685147 | 7100396 | 1128584 | KDEL (Lys-Asp-Glu-Leu) endoplasmic reticulum protein retention receptor 2 | Kdelr2  | 304290 | 1,13 | down |
| 5753797 | 7298920 | 1618826 | kelch domain containing 2                                                 | Klhdc2  | 299113 | 1,60 | up   |
| 5798556 | 7298920 | 1618827 | kelch domain containing 2                                                 | Klhdc2  | 299113 | 1,06 | up   |
| 5799945 | 7298920 | 1618828 | kelch domain containing 2                                                 | Klhdc2  | 299113 | 1,04 | up   |
| 6129110 | 7298920 | 1618830 | kelch domain containing 2                                                 | Klhdc2  | 299113 | 1,03 | up   |
| 6168699 | 7298920 | 1618825 | kelch domain containing 2                                                 | Klhdc2  | 299113 | 1,15 | down |
| 6303958 | 7298920 | 1618833 | kelch domain containing 2                                                 | Klhdc2  | 299113 | 1,26 | down |
| 6307360 | 7298920 | 1618824 | kelch domain containing 2                                                 | Klhdc2  | 299113 | 1,08 | up   |
| 6468698 | 7298920 | 1618822 | kelch domain containing 2                                                 | Klhdc2  | 299113 | 1,05 | up   |
| 6470820 | 7298920 | 1618831 | kelch domain containing 2                                                 | Klhdc2  | 299113 | 1,19 | up   |
| 6581598 | 7298920 | 1618832 | kelch domain containing 2                                                 | Klhdc2  | 299113 | 2,32 | down |
| 6590189 | 7298920 | 1618828 | kelch domain containing 2                                                 | Klhdc2  | 299113 | 1,06 | down |
| 6675516 | 7298920 | 1618829 | kelch domain containing 2                                                 | Klhdc2  | 299113 | 1,11 | down |
| 6104899 | 7104977 | 1140172 | kelch domain containing 8A                                                | Klhdc8a | 305096 | 1,31 | down |
| 6183649 | 7104977 | 1140173 | kelch domain containing 8A                                                | Klhdc8a | 305096 | 2,09 | up   |

|         |         |         |                            |         |        |      |      |
|---------|---------|---------|----------------------------|---------|--------|------|------|
| 6306142 | 7104977 | 1140171 | kelch domain containing 8A | Klhdc8a | 305096 | 1,04 | up   |
| 6477822 | 7104977 | 1140173 | kelch domain containing 8A | Klhdc8a | 305096 | 1,44 | down |
| 6541679 | 7104977 | 1140173 | kelch domain containing 8A | Klhdc8a | 305096 | 1,43 | up   |
| 6734310 | 7104977 | 1140173 | kelch domain containing 8A | Klhdc8a | 305096 | 1,06 | up   |
| 6044430 | 7373038 | 1804297 | kelch-like 13 (Drosophila) | Klh113  | 313445 | 1,09 | up   |
| 6165425 | 7373038 | 1804295 | kelch-like 13 (Drosophila) | Klh113  | 313445 | 1,08 | down |
| 6308423 | 7373038 | 1804296 | kelch-like 13 (Drosophila) | Klh113  | 313445 | 1,47 | down |
| 6433424 | 7373038 | 1804297 | kelch-like 13 (Drosophila) | Klh113  | 313445 | 1,84 | up   |
| 5736596 | 7082471 | 1084900 | keratin 12                 | Krt12   | 360625 | 2,45 | down |
| 5808849 | 7082471 | 1084897 | keratin 12                 | Krt12   | 360625 | 1,00 | down |
| 5838641 | 7082471 | 1084893 | keratin 12                 | Krt12   | 360625 | 1,30 | up   |
| 6222024 | 7082471 | 1084898 | keratin 12                 | Krt12   | 360625 | 1,09 | up   |
| 6320156 | 7082471 | 1084895 | keratin 12                 | Krt12   | 360625 | 1,08 | up   |
| 6351230 | 7082471 | 1084900 | keratin 12                 | Krt12   | 360625 | 1,15 | up   |
| 6643099 | 7082471 | 1084893 | keratin 12                 | Krt12   | 360625 | 1,23 | up   |
| 6658077 | 7082471 | 1084899 | keratin 12                 | Krt12   | 360625 | 1,25 | up   |
| 6734792 | 7082471 | 1084896 | keratin 12                 | Krt12   | 360625 | 1,69 | down |
| 6735863 | 7082471 | 1084894 | keratin 12                 | Krt12   | 360625 | 1,07 | up   |
| 5667517 | 7191382 | 1353516 | keratin 18                 | Krt18   | 294853 | 1,11 | down |
| 5789573 | 7191382 | 1353517 | keratin 18                 | Krt18   | 294853 | 1,19 | up   |
| 6080586 | 7191382 | 1353516 | keratin 18                 | Krt18   | 294853 | 1,37 | up   |
| 6193172 | 7191382 | 1353516 | keratin 18                 | Krt18   | 294853 | 2,05 | down |
| 5668835 | 7082611 | 1085221 | keratin 19                 | Krt19   | 360626 | 3,91 | down |
| 5781443 | 7082611 | 1085226 | keratin 19                 | Krt19   | 360626 | 1,50 | up   |
| 5843864 | 7082611 | 1085222 | keratin 19                 | Krt19   | 360626 | 1,38 | down |
| 6130508 | 7082611 | 1085223 | keratin 19                 | Krt19   | 360626 | 1,04 | down |
| 6146499 | 7082611 | 1085225 | keratin 19                 | Krt19   | 360626 | 1,35 | up   |
| 6148024 | 7082611 | 1085224 | keratin 19                 | Krt19   | 360626 | 1,12 | down |
| 6389612 | 7082611 | 1085227 | keratin 19                 | Krt19   | 360626 | 1,11 | up   |
| 6638331 | 7082611 | 1085223 | keratin 19                 | Krt19   | 360626 | 1,40 | down |
| 5742215 | 7332018 | 1700611 | keratin 2                  | Krt2    | 406228 | 1,06 | down |
| 5757839 | 7332018 | 1700616 | keratin 2                  | Krt2    | 406228 | 1,17 | down |
| 5772290 | 7332018 | 1700616 | keratin 2                  | Krt2    | 406228 | 1,12 | up   |
| 5789929 | 7332018 | 1700614 | keratin 2                  | Krt2    | 406228 | 1,17 | down |
| 5847118 | 7332018 | 1700623 | keratin 2                  | Krt2    | 406228 | 1,17 | down |
| 5856430 | 7332018 | 1700618 | keratin 2                  | Krt2    | 406228 | 1,07 | up   |
| 5875161 | 7332018 | 1700609 | keratin 2                  | Krt2    | 406228 | 1,06 | up   |
| 5980299 | 7332018 | 1700620 | keratin 2                  | Krt2    | 406228 | 1,14 | up   |
| 6027943 | 7332018 | 1700615 | keratin 2                  | Krt2    | 406228 | 1,21 | up   |
| 6046049 | 7332018 | 1700612 | keratin 2                  | Krt2    | 406228 | 2,08 | down |
| 6055510 | 7332018 | 1700613 | keratin 2                  | Krt2    | 406228 | 1,05 | up   |
| 6178822 | 7332018 | 1700621 | keratin 2                  | Krt2    | 406228 | 1,48 | up   |
| 6204638 | 7332018 | 1700609 | keratin 2                  | Krt2    | 406228 | 1,20 | down |
| 6238821 | 7332018 | 1700617 | keratin 2                  | Krt2    | 406228 | 1,03 | up   |
| 6252637 | 7332018 | 1700615 | keratin 2                  | Krt2    | 406228 | 1,00 | up   |
| 6272147 | 7332018 | 1700622 | keratin 2                  | Krt2    | 406228 | 1,08 | down |
| 6397907 | 7332018 | 1700622 | keratin 2                  | Krt2    | 406228 | 1,22 | up   |
| 6539148 | 7332018 | 1700610 | keratin 2                  | Krt2    | 406228 | 1,77 | down |
| 6597525 | 7332018 | 1700609 | keratin 2                  | Krt2    | 406228 | 1,10 | up   |
| 6708803 | 7332018 | 1700619 | keratin 2                  | Krt2    | 406228 | 1,14 | up   |
| 5707825 | 7082574 | 1085138 | keratin 31                 | Krt31   | 450228 | 1,16 | down |
| 5733027 | 7082574 | 1085140 | keratin 31                 | Krt31   | 450228 | 1,12 | up   |
| 5790332 | 7082574 | 1085138 | keratin 31                 | Krt31   | 450228 | 1,07 | down |
| 5936978 | 7082574 | 1085142 | keratin 31                 | Krt31   | 450228 | 2,33 | up   |
| 6025779 | 7082574 | 1085139 | keratin 31                 | Krt31   | 450228 | 1,35 | up   |
| 6084861 | 7082574 | 1085141 | keratin 31                 | Krt31   | 450228 | 1,48 | up   |

|         |         |         |                                                        |                  |                   |      |      |
|---------|---------|---------|--------------------------------------------------------|------------------|-------------------|------|------|
| 6519664 | 7082574 | 1085137 | keratin 31                                             | Krt31            | 450228            | 1,05 | down |
| 6034901 | 7082574 | 1085143 | keratin 33A /// keratin 31                             | Krt33a /// Krt31 | 303527 /// 450228 | 1,03 | up   |
| 6336944 | 7082574 | 1085144 | keratin 33A /// keratin 31                             | Krt33a /// Krt31 | 303527 /// 450228 | 1,20 | up   |
| 5690324 | 7331982 | 1700523 | keratin 75                                             | Krt75            | 300247            | 1,09 | down |
| 5723736 | 7331982 | 1700524 | keratin 75                                             | Krt75            | 300247            | 1,03 | up   |
| 5826810 | 7331982 | 1700521 | keratin 75                                             | Krt75            | 300247            | 2,00 | down |
| 5877857 | 7331982 | 1700529 | keratin 75                                             | Krt75            | 300247            | 1,05 | down |
| 5899377 | 7331982 | 1700528 | keratin 75                                             | Krt75            | 300247            | 1,00 | up   |
| 6066112 | 7331982 | 1700529 | keratin 75                                             | Krt75            | 300247            | 1,01 | up   |
| 6210126 | 7331982 | 1700527 | keratin 75                                             | Krt75            | 300247            | 1,12 | down |
| 6328610 | 7331982 | 1700528 | keratin 75                                             | Krt75            | 300247            | 1,62 | down |
| 6365441 | 7331982 | 1700522 | keratin 75                                             | Krt75            | 300247            | 1,04 | down |
| 6366869 | 7331982 | 1700529 | keratin 75                                             | Krt75            | 300247            | 1,05 | up   |
| 6586809 | 7331982 | 1700526 | keratin 75                                             | Krt75            | 300247            | 1,06 | down |
| 6607541 | 7331982 | 1700521 | keratin 75                                             | Krt75            | 300247            | 1,44 | down |
| 6719085 | 7331982 | 1700525 | keratin 75                                             | Krt75            | 300247            | 1,36 | down |
| 5876320 | 7332059 | 1700725 | keratin 78                                             | Krt78            | 685672            | 1,00 | down |
| 6440174 | 7332059 | 1700725 | keratin 78                                             | Krt78            | 685672            | 1,29 | up   |
| 5802733 | 7331976 | 1700494 | keratin 82                                             | Krt82            | 366991            | 1,64 | up   |
| 5888964 | 7331976 | 1700499 | keratin 82                                             | Krt82            | 366991            | 1,40 | down |
| 6011846 | 7331976 | 1700493 | keratin 82                                             | Krt82            | 366991            | 1,08 | down |
| 6038807 | 7331976 | 1700497 | keratin 82                                             | Krt82            | 366991            | 1,06 | down |
| 6189117 | 7331976 | 1700493 | keratin 82                                             | Krt82            | 366991            | 2,28 | down |
| 6282894 | 7331976 | 1700500 | keratin 82                                             | Krt82            | 366991            | 1,06 | up   |
| 6558918 | 7331976 | 1700498 | keratin 82                                             | Krt82            | 366991            | 1,07 | up   |
| 6575232 | 7331976 | 1700495 | keratin 82                                             | Krt82            | 366991            | 2,15 | up   |
| 6619870 | 7331976 | 1700496 | keratin 82                                             | Krt82            | 366991            | 1,17 | up   |
| 6708430 | 7331976 | 1700501 | keratin 82                                             | Krt82            | 366991            | 1,16 | down |
| 5835015 | 7367946 | 1788952 | KH-type splicing regulatory protein                    | Khsrp            | 171137            | 1,24 | down |
| 5853975 | 7367946 | 1788947 | KH-type splicing regulatory protein                    | Khsrp            | 171137            | 1,07 | up   |
| 5858265 | 7367946 | 1788955 | KH-type splicing regulatory protein                    | Khsrp            | 171137            | 1,06 | down |
| 5890409 | 7367946 | 1788943 | KH-type splicing regulatory protein                    | Khsrp            | 171137            | 1,11 | down |
| 5893940 | 7367946 | 1788961 | KH-type splicing regulatory protein                    | Khsrp            | 171137            | 1,03 | up   |
| 5907882 | 7367946 | 1788959 | KH-type splicing regulatory protein                    | Khsrp            | 171137            | 1,26 | down |
| 5914772 | 7367946 | 1788956 | KH-type splicing regulatory protein                    | Khsrp            | 171137            | 1,17 | up   |
| 5931162 | 7367946 | 1788943 | KH-type splicing regulatory protein                    | Khsrp            | 171137            | 1,09 | down |
| 5935237 | 7367946 | 1788962 | KH-type splicing regulatory protein                    | Khsrp            | 171137            | 1,08 | up   |
| 5999404 | 7367946 | 1788951 | KH-type splicing regulatory protein                    | Khsrp            | 171137            | 1,00 | up   |
| 6156530 | 7367946 | 1788953 | KH-type splicing regulatory protein                    | Khsrp            | 171137            | 1,03 | up   |
| 6171276 | 7367946 | 1788957 | KH-type splicing regulatory protein                    | Khsrp            | 171137            | 1,00 | down |
| 6188475 | 7367946 | 1788943 | KH-type splicing regulatory protein                    | Khsrp            | 171137            | 1,13 | up   |
| 6279968 | 7367946 | 1788950 | KH-type splicing regulatory protein                    | Khsrp            | 171137            | 1,17 | down |
| 6402851 | 7367946 | 1788945 | KH-type splicing regulatory protein                    | Khsrp            | 171137            | 1,29 | down |
| 6411350 | 7367946 | 1788958 | KH-type splicing regulatory protein                    | Khsrp            | 171137            | 1,19 | up   |
| 6455413 | 7367946 | 1788960 | KH-type splicing regulatory protein                    | Khsrp            | 171137            | 1,05 | down |
| 6495838 | 7367946 | 1788943 | KH-type splicing regulatory protein                    | Khsrp            | 171137            | 1,18 | up   |
| 6521899 | 7367946 | 1788946 | KH-type splicing regulatory protein                    | Khsrp            | 171137            | 3,21 | down |
| 6648745 | 7367946 | 1788949 | KH-type splicing regulatory protein                    | Khsrp            | 171137            | 1,03 | down |
| 6654918 | 7367946 | 1788965 | KH-type splicing regulatory protein                    | Khsrp            | 171137            | 1,05 | down |
| 6729709 | 7367946 | 1788954 | KH-type splicing regulatory protein                    | Khsrp            | 171137            | 1,03 | up   |
| 5942214 | 7269311 | 1545599 | killer cell lectin-like receptor subfamily G, member 1 | Klrg1            | 58975             | 1,12 | up   |
| 5999646 | 7269311 | 1545601 | killer cell lectin-like receptor subfamily G, member 1 | Klrg1            | 58975             | 1,17 | up   |
| 6029307 | 7269311 | 1545600 | killer cell lectin-like receptor subfamily G, member 1 | Klrg1            | 58975             | 2,19 | down |
| 6087200 | 7269311 | 1545599 | killer cell lectin-like receptor subfamily G, member 1 | Klrg1            | 58975             | 1,34 | up   |
| 6090438 | 7269311 | 1545603 | killer cell lectin-like receptor subfamily G, member 1 | Klrg1            | 58975             | 2,09 | down |
| 6146691 | 7269311 | 1545600 | killer cell lectin-like receptor subfamily G, member 1 | Klrg1            | 58975             | 1,21 | down |

|         |         |         |                                                        |        |        |      |      |
|---------|---------|---------|--------------------------------------------------------|--------|--------|------|------|
| 6380500 | 7269311 | 1545599 | killer cell lectin-like receptor subfamily G, member 1 | Klrg1  | 58975  | 1,18 | down |
| 6485465 | 7269311 | 1545603 | killer cell lectin-like receptor subfamily G, member 1 | Klrg1  | 58975  | 1,06 | down |
| 6621376 | 7269311 | 1545602 | killer cell lectin-like receptor subfamily G, member 1 | Klrg1  | 58975  | 1,62 | up   |
| 5634625 | 7131103 | 1204328 | kinectin 1                                             | Ktn1   | 361029 | 1,10 | down |
| 5645606 | 7131103 | 1204361 | kinectin 1                                             | Ktn1   | 361029 | 1,69 | up   |
| 5672586 | 7131103 | 1204363 | kinectin 1                                             | Ktn1   | 361029 | 1,58 | down |
| 5673234 | 7131103 | 1204342 | kinectin 1                                             | Ktn1   | 361029 | 1,21 | up   |
| 5716072 | 7131103 | 1204365 | kinectin 1                                             | Ktn1   | 361029 | 1,07 | down |
| 5721011 | 7131103 | 1204364 | kinectin 1                                             | Ktn1   | 361029 | 1,79 | down |
| 5758924 | 7131103 | 1204364 | kinectin 1                                             | Ktn1   | 361029 | 1,46 | down |
| 5802430 | 7131103 | 1204321 | kinectin 1                                             | Ktn1   | 361029 | 1,08 | down |
| 5802965 | 7131103 | 1204323 | kinectin 1                                             | Ktn1   | 361029 | 1,78 | up   |
| 5820456 | 7131103 | 1204329 | kinectin 1                                             | Ktn1   | 361029 | 1,10 | up   |
| 5897330 | 7131103 | 1204349 | kinectin 1                                             | Ktn1   | 361029 | 1,30 | up   |
| 5903694 | 7131103 | 1204326 | kinectin 1                                             | Ktn1   | 361029 | 1,09 | down |
| 6000684 | 7131103 | 1204354 | kinectin 1                                             | Ktn1   | 361029 | 1,10 | down |
| 6025369 | 7131103 | 1204360 | kinectin 1                                             | Ktn1   | 361029 | 1,26 | down |
| 6067282 | 7131103 | 1204335 | kinectin 1                                             | Ktn1   | 361029 | 1,19 | down |
| 6072242 | 7131103 | 1204347 | kinectin 1                                             | Ktn1   | 361029 | 1,40 | down |
| 6099597 | 7131103 | 1204340 | kinectin 1                                             | Ktn1   | 361029 | 1,30 | up   |
| 6116626 | 7131103 | 1204327 | kinectin 1                                             | Ktn1   | 361029 | 1,20 | up   |
| 6117529 | 7131103 | 1204336 | kinectin 1                                             | Ktn1   | 361029 | 1,96 | down |
| 6135828 | 7131103 | 1204324 | kinectin 1                                             | Ktn1   | 361029 | 1,01 | down |
| 6184038 | 7131103 | 1204368 | kinectin 1                                             | Ktn1   | 361029 | 1,14 | down |
| 6211396 | 7131103 | 1204334 | kinectin 1                                             | Ktn1   | 361029 | 1,06 | down |
| 6213089 | 7131103 | 1204366 | kinectin 1                                             | Ktn1   | 361029 | 1,50 | down |
| 6241733 | 7131103 | 1204353 | kinectin 1                                             | Ktn1   | 361029 | 1,13 | up   |
| 6242779 | 7131103 | 1204345 | kinectin 1                                             | Ktn1   | 361029 | 1,06 | down |
| 6290731 | 7131103 | 1204323 | kinectin 1                                             | Ktn1   | 361029 | 1,44 | up   |
| 6300097 | 7131103 | 1204346 | kinectin 1                                             | Ktn1   | 361029 | 1,16 | up   |
| 6306088 | 7131103 | 1204355 | kinectin 1                                             | Ktn1   | 361029 | 1,07 | up   |
| 6311411 | 7131103 | 1204359 | kinectin 1                                             | Ktn1   | 361029 | 1,20 | down |
| 6316610 | 7131103 | 1204352 | kinectin 1                                             | Ktn1   | 361029 | 1,20 | down |
| 6346243 | 7131103 | 1204337 | kinectin 1                                             | Ktn1   | 361029 | 1,93 | up   |
| 6367417 | 7131103 | 1204348 | kinectin 1                                             | Ktn1   | 361029 | 1,31 | up   |
| 6405161 | 7131103 | 1204367 | kinectin 1                                             | Ktn1   | 361029 | 1,02 | down |
| 6423967 | 7131103 | 1204338 | kinectin 1                                             | Ktn1   | 361029 | 1,32 | down |
| 6432971 | 7131103 | 1204344 | kinectin 1                                             | Ktn1   | 361029 | 1,67 | up   |
| 6460842 | 7131103 | 1204339 | kinectin 1                                             | Ktn1   | 361029 | 1,12 | up   |
| 6471289 | 7131103 | 1204357 | kinectin 1                                             | Ktn1   | 361029 | 1,34 | down |
| 6497930 | 7131103 | 1204351 | kinectin 1                                             | Ktn1   | 361029 | 1,02 | up   |
| 6501559 | 7131103 | 1204331 | kinectin 1                                             | Ktn1   | 361029 | 1,03 | down |
| 6514716 | 7131103 | 1204325 | kinectin 1                                             | Ktn1   | 361029 | 1,13 | up   |
| 6542889 | 7131103 | 1204343 | kinectin 1                                             | Ktn1   | 361029 | 1,50 | down |
| 6543152 | 7131103 | 1204333 | kinectin 1                                             | Ktn1   | 361029 | 1,07 | up   |
| 6575346 | 7131103 | 1204362 | kinectin 1                                             | Ktn1   | 361029 | 1,29 | down |
| 6722995 | 7131103 | 1204330 | kinectin 1                                             | Ktn1   | 361029 | 1,55 | down |
| 6735411 | 7131103 | 1204350 | kinectin 1                                             | Ktn1   | 361029 | 1,01 | up   |
| 5652319 | 7156170 | 1266269 | kinesin family member 13A                              | Kif13a | 308173 | 1,11 | down |
| 5672260 | 7156170 | 1266264 | kinesin family member 13A                              | Kif13a | 308173 | 1,11 | down |
| 5709711 | 7156170 | 1266255 | kinesin family member 13A                              | Kif13a | 308173 | 1,09 | up   |
| 5734358 | 7156170 | 1266279 | kinesin family member 13A                              | Kif13a | 308173 | 1,32 | down |
| 5744057 | 7156170 | 1266261 | kinesin family member 13A                              | Kif13a | 308173 | 1,51 | down |
| 5770581 | 7156170 | 1266277 | kinesin family member 13A                              | Kif13a | 308173 | 1,12 | up   |
| 5787938 | 7156170 | 1266278 | kinesin family member 13A                              | Kif13a | 308173 | 1,23 | down |
| 5802281 | 7156170 | 1266263 | kinesin family member 13A                              | Kif13a | 308173 | 1,32 | up   |

|         |         |         |                           |        |        |      |      |
|---------|---------|---------|---------------------------|--------|--------|------|------|
| 5861703 | 7156170 | 1266287 | kinesin family member 13A | Kif13a | 308173 | 1,17 | down |
| 5873211 | 7156170 | 1266265 | kinesin family member 13A | Kif13a | 308173 | 1,16 | down |
| 5958685 | 7156170 | 1266282 | kinesin family member 13A | Kif13a | 308173 | 1,00 | up   |
| 5960253 | 7156170 | 1266257 | kinesin family member 13A | Kif13a | 308173 | 1,50 | up   |
| 5963002 | 7156170 | 1266280 | kinesin family member 13A | Kif13a | 308173 | 1,03 | down |
| 5986019 | 7156170 | 1266276 | kinesin family member 13A | Kif13a | 308173 | 1,77 | down |
| 5995931 | 7156170 | 1266256 | kinesin family member 13A | Kif13a | 308173 | 1,18 | up   |
| 6029373 | 7156170 | 1266230 | kinesin family member 13A | Kif13a | 308173 | 1,30 | up   |
| 6062447 | 7156170 | 1266271 | kinesin family member 13A | Kif13a | 308173 | 1,05 | down |
| 6071329 | 7156170 | 1266247 | kinesin family member 13A | Kif13a | 308173 | 1,40 | up   |
| 6083252 | 7156170 | 1266272 | kinesin family member 13A | Kif13a | 308173 | 1,23 | down |
| 6088488 | 7156170 | 1266281 | kinesin family member 13A | Kif13a | 308173 | 1,00 | up   |
| 6112698 | 7156170 | 1266268 | kinesin family member 13A | Kif13a | 308173 | 1,60 | up   |
| 6148205 | 7156170 | 1266267 | kinesin family member 13A | Kif13a | 308173 | 1,08 | up   |
| 6175233 | 7156170 | 1266254 | kinesin family member 13A | Kif13a | 308173 | 1,15 | down |
| 6218818 | 7156170 | 1266262 | kinesin family member 13A | Kif13a | 308173 | 2,06 | up   |
| 6254798 | 7156170 | 1266275 | kinesin family member 13A | Kif13a | 308173 | 1,14 | down |
| 6394399 | 7156170 | 1266253 | kinesin family member 13A | Kif13a | 308173 | 1,04 | down |
| 6486067 | 7156170 | 1266287 | kinesin family member 13A | Kif13a | 308173 | 1,22 | down |
| 6500866 | 7156170 | 1266266 | kinesin family member 13A | Kif13a | 308173 | 1,35 | down |
| 6511219 | 7156170 | 1266252 | kinesin family member 13A | Kif13a | 308173 | 2,70 | down |
| 6529086 | 7156170 | 1266258 | kinesin family member 13A | Kif13a | 308173 | 1,03 | down |
| 6532536 | 7156170 | 1266245 | kinesin family member 13A | Kif13a | 308173 | 1,32 | down |
| 6557619 | 7156170 | 1266249 | kinesin family member 13A | Kif13a | 308173 | 1,03 | up   |
| 6626596 | 7156170 | 1266248 | kinesin family member 13A | Kif13a | 308173 | 1,29 | down |
| 6643886 | 7156170 | 1266267 | kinesin family member 13A | Kif13a | 308173 | 1,09 | up   |
| 6692516 | 7156170 | 1266274 | kinesin family member 13A | Kif13a | 308173 | 2,14 | up   |
| 6693249 | 7156170 | 1266286 | kinesin family member 13A | Kif13a | 308173 | 1,01 | up   |
| 6709693 | 7156170 | 1266246 | kinesin family member 13A | Kif13a | 308173 | 1,26 | up   |
| 5654129 | 7073563 | 1064720 | kinesin family member 19A | Kif19a | 303659 | 1,14 | up   |
| 5698183 | 7073563 | 1064722 | kinesin family member 19A | Kif19a | 303659 | 1,43 | down |
| 5823787 | 7073563 | 1064719 | kinesin family member 19A | Kif19a | 303659 | 1,05 | up   |
| 5876536 | 7073563 | 1064710 | kinesin family member 19A | Kif19a | 303659 | 1,36 | down |
| 5889131 | 7073563 | 1064706 | kinesin family member 19A | Kif19a | 303659 | 1,18 | down |
| 5946665 | 7073563 | 1064720 | kinesin family member 19A | Kif19a | 303659 | 1,13 | up   |
| 5973073 | 7073563 | 1064718 | kinesin family member 19A | Kif19a | 303659 | 1,37 | down |
| 5993440 | 7073563 | 1064717 | kinesin family member 19A | Kif19a | 303659 | 1,21 | up   |
| 6013186 | 7073563 | 1064709 | kinesin family member 19A | Kif19a | 303659 | 1,12 | up   |
| 6042873 | 7073563 | 1064721 | kinesin family member 19A | Kif19a | 303659 | 2,71 | down |
| 6119992 | 7073563 | 1064719 | kinesin family member 19A | Kif19a | 303659 | 1,08 | up   |
| 6193250 | 7073563 | 1064706 | kinesin family member 19A | Kif19a | 303659 | 1,21 | down |
| 6310984 | 7073563 | 1064711 | kinesin family member 19A | Kif19a | 303659 | 1,57 | down |
| 6349890 | 7073563 | 1064723 | kinesin family member 19A | Kif19a | 303659 | 1,15 | up   |
| 6430070 | 7073563 | 1064714 | kinesin family member 19A | Kif19a | 303659 | 1,05 | up   |
| 6596123 | 7073563 | 1064716 | kinesin family member 19A | Kif19a | 303659 | 1,51 | up   |
| 6694989 | 7073563 | 1064715 | kinesin family member 19A | Kif19a | 303659 | 1,02 | up   |
| 6314979 | 7108300 | 1147888 | kinesin family member 26B | Kif26b | 305012 | 1,01 | up   |
| 6396616 | 7108300 | 1147895 | kinesin family member 26B | Kif26b | 305012 | 1,28 | down |
| 6720328 | 7108300 | 1147897 | kinesin family member 26B | Kif26b | 305012 | 1,12 | down |
| 5621070 | 7217040 | 1415267 | kinesin family member C1  | Kifc1  | 294286 | 1,03 | down |
| 5677912 | 7217040 | 1415268 | kinesin family member C1  | Kifc1  | 294286 | 1,34 | up   |
| 5780660 | 7217040 | 1415265 | kinesin family member C1  | Kifc1  | 294286 | 4,68 | up   |
| 5787173 | 7217040 | 1415269 | kinesin family member C1  | Kifc1  | 294286 | 1,04 | up   |
| 5823957 | 7217040 | 1415265 | kinesin family member C1  | Kifc1  | 294286 | 1,53 | down |
| 5906379 | 7217040 | 1415265 | kinesin family member C1  | Kifc1  | 294286 | 1,01 | down |
| 6188268 | 7217040 | 1415271 | kinesin family member C1  | Kifc1  | 294286 | 1,26 | up   |



|         |         |         |                          |       |        |      |      |
|---------|---------|---------|--------------------------|-------|--------|------|------|
| 6253096 | 7217040 | 1415262 | kinesin family member C1 | Kifc1 | 294286 | 1,20 | up   |
| 6304546 | 7217040 | 1415263 | kinesin family member C1 | Kifc1 | 294286 | 1,10 | up   |
| 6517220 | 7217040 | 1415271 | kinesin family member C1 | Kifc1 | 294286 | 1,59 | down |
| 6542419 | 7217040 | 1415262 | kinesin family member C1 | Kifc1 | 294286 | 1,18 | down |
| 6588869 | 7217040 | 1415270 | kinesin family member C1 | Kifc1 | 294286 | 1,14 | up   |
| 6598938 | 7217040 | 1415264 | kinesin family member C1 | Kifc1 | 294286 | 1,07 | down |
| 6603409 | 7217040 | 1415266 | kinesin family member C1 | Kifc1 | 294286 | 1,04 | up   |
| 6634890 | 7217040 | 1415265 | kinesin family member C1 | Kifc1 | 294286 | 1,41 | down |
| 6712556 | 7217040 | 1415268 | kinesin family member C1 | Kifc1 | 294286 | 1,36 | down |
| 5636159 | 7102113 | 1132844 | kinetochore associated 1 | Kntc1 | 304477 | 1,49 | up   |
| 5697786 | 7102113 | 1132824 | kinetochore associated 1 | Kntc1 | 304477 | 1,13 | down |
| 5709465 | 7102113 | 1132830 | kinetochore associated 1 | Kntc1 | 304477 | 1,13 | up   |
| 5731649 | 7102113 | 1132816 | kinetochore associated 1 | Kntc1 | 304477 | 1,01 | up   |
| 5738578 | 7102113 | 1132799 | kinetochore associated 1 | Kntc1 | 304477 | 2,28 | down |
| 5738793 | 7102113 | 1132843 | kinetochore associated 1 | Kntc1 | 304477 | 1,10 | up   |
| 5763593 | 7102113 | 1132805 | kinetochore associated 1 | Kntc1 | 304477 | 1,39 | down |
| 5810851 | 7102113 | 1132842 | kinetochore associated 1 | Kntc1 | 304477 | 1,07 | down |
| 5841819 | 7102113 | 1132825 | kinetochore associated 1 | Kntc1 | 304477 | 1,25 | up   |
| 5861828 | 7102113 | 1132829 | kinetochore associated 1 | Kntc1 | 304477 | 1,17 | up   |
| 5877156 | 7102113 | 1132828 | kinetochore associated 1 | Kntc1 | 304477 | 1,28 | up   |
| 5879018 | 7102113 | 1132846 | kinetochore associated 1 | Kntc1 | 304477 | 1,17 | down |
| 5887379 | 7102113 | 1132792 | kinetochore associated 1 | Kntc1 | 304477 | 1,40 | down |
| 5899161 | 7102113 | 1132810 | kinetochore associated 1 | Kntc1 | 304477 | 1,02 | up   |
| 5916259 | 7102113 | 1132790 | kinetochore associated 1 | Kntc1 | 304477 | 1,07 | down |
| 5921868 | 7102113 | 1132847 | kinetochore associated 1 | Kntc1 | 304477 | 1,01 | down |
| 5955797 | 7102113 | 1132832 | kinetochore associated 1 | Kntc1 | 304477 | 1,26 | down |
| 5956305 | 7102113 | 1132848 | kinetochore associated 1 | Kntc1 | 304477 | 1,31 | down |
| 6041665 | 7102113 | 1132800 | kinetochore associated 1 | Kntc1 | 304477 | 1,15 | down |
| 6056875 | 7102113 | 1132836 | kinetochore associated 1 | Kntc1 | 304477 | 1,28 | down |
| 6063602 | 7102113 | 1132849 | kinetochore associated 1 | Kntc1 | 304477 | 1,19 | up   |
| 6066190 | 7102113 | 1132820 | kinetochore associated 1 | Kntc1 | 304477 | 1,00 | down |
| 6096251 | 7102113 | 1132809 | kinetochore associated 1 | Kntc1 | 304477 | 1,42 | up   |
| 6134735 | 7102113 | 1132851 | kinetochore associated 1 | Kntc1 | 304477 | 1,20 | down |
| 6141397 | 7102113 | 1132842 | kinetochore associated 1 | Kntc1 | 304477 | 1,33 | up   |
| 6168210 | 7102113 | 1132788 | kinetochore associated 1 | Kntc1 | 304477 | 1,07 | up   |
| 6180310 | 7102113 | 1132787 | kinetochore associated 1 | Kntc1 | 304477 | 1,14 | up   |
| 6225781 | 7102113 | 1132828 | kinetochore associated 1 | Kntc1 | 304477 | 1,43 | down |
| 6231926 | 7102113 | 1132822 | kinetochore associated 1 | Kntc1 | 304477 | 1,14 | down |
| 6239657 | 7102113 | 1132817 | kinetochore associated 1 | Kntc1 | 304477 | 1,29 | down |
| 6243313 | 7102113 | 1132785 | kinetochore associated 1 | Kntc1 | 304477 | 1,08 | up   |
| 6264939 | 7102113 | 1132812 | kinetochore associated 1 | Kntc1 | 304477 | 1,13 | down |
| 6281190 | 7102113 | 1132831 | kinetochore associated 1 | Kntc1 | 304477 | 1,19 | down |
| 6320390 | 7102113 | 1132803 | kinetochore associated 1 | Kntc1 | 304477 | 1,22 | up   |
| 6323436 | 7102113 | 1132838 | kinetochore associated 1 | Kntc1 | 304477 | 1,20 | down |
| 6332736 | 7102113 | 1132796 | kinetochore associated 1 | Kntc1 | 304477 | 1,62 | down |
| 6361982 | 7102113 | 1132814 | kinetochore associated 1 | Kntc1 | 304477 | 1,37 | down |
| 6368074 | 7102113 | 1132818 | kinetochore associated 1 | Kntc1 | 304477 | 1,02 | down |
| 6380753 | 7102113 | 1132850 | kinetochore associated 1 | Kntc1 | 304477 | 1,27 | down |
| 6404139 | 7102113 | 1132834 | kinetochore associated 1 | Kntc1 | 304477 | 1,23 | down |
| 6410920 | 7102113 | 1132826 | kinetochore associated 1 | Kntc1 | 304477 | 1,32 | down |
| 6416684 | 7102113 | 1132819 | kinetochore associated 1 | Kntc1 | 304477 | 1,19 | up   |
| 6437085 | 7102113 | 1132797 | kinetochore associated 1 | Kntc1 | 304477 | 1,12 | down |
| 6467569 | 7102113 | 1132802 | kinetochore associated 1 | Kntc1 | 304477 | 2,27 | down |
| 6475953 | 7102113 | 1132806 | kinetochore associated 1 | Kntc1 | 304477 | 1,02 | up   |
| 6484736 | 7102113 | 1132833 | kinetochore associated 1 | Kntc1 | 304477 | 1,43 | down |
| 6519393 | 7102113 | 1132795 | kinetochore associated 1 | Kntc1 | 304477 | 1,12 | down |

|         |         |         |                                       |       |        |      |      |
|---------|---------|---------|---------------------------------------|-------|--------|------|------|
| 6528080 | 7102113 | 1132823 | kinetochore associated 1              | Kntc1 | 304477 | 1,18 | down |
| 6546496 | 7102113 | 1132827 | kinetochore associated 1              | Kntc1 | 304477 | 1,01 | down |
| 6595382 | 7102113 | 1132789 | kinetochore associated 1              | Kntc1 | 304477 | 1,22 | up   |
| 6598333 | 7102113 | 1132807 | kinetochore associated 1              | Kntc1 | 304477 | 1,16 | up   |
| 6605945 | 7102113 | 1132793 | kinetochore associated 1              | Kntc1 | 304477 | 1,01 | down |
| 6624343 | 7102113 | 1132821 | kinetochore associated 1              | Kntc1 | 304477 | 1,03 | down |
| 6633492 | 7102113 | 1132804 | kinetochore associated 1              | Kntc1 | 304477 | 1,61 | down |
| 6642126 | 7102113 | 1132826 | kinetochore associated 1              | Kntc1 | 304477 | 1,02 | up   |
| 6694906 | 7102113 | 1132852 | kinetochore associated 1              | Kntc1 | 304477 | 1,17 | up   |
| 6709889 | 7102113 | 1132836 | kinetochore associated 1              | Kntc1 | 304477 | 1,15 | up   |
| 6712800 | 7102113 | 1132794 | kinetochore associated 1              | Kntc1 | 304477 | 1,42 | up   |
| 6724955 | 7102113 | 1132815 | kinetochore associated 1              | Kntc1 | 304477 | 1,14 | down |
| 6730513 | 7102113 | 1132811 | kinetochore associated 1              | Kntc1 | 304477 | 1,25 | down |
| 6736849 | 7102113 | 1132837 | kinetochore associated 1              | Kntc1 | 304477 | 1,03 | up   |
| 5622635 | 7314316 | 1657925 | KIT ligand                            | Kitlg | 60427  | 1,51 | down |
| 5699521 | 7314316 | 1657933 | KIT ligand                            | Kitlg | 60427  | 2,48 | down |
| 5762732 | 7314316 | 1657930 | KIT ligand                            | Kitlg | 60427  | 1,28 | down |
| 5910925 | 7314316 | 1657935 | KIT ligand                            | Kitlg | 60427  | 1,74 | up   |
| 5943058 | 7314316 | 1657929 | KIT ligand                            | Kitlg | 60427  | 1,27 | up   |
| 6132415 | 7314316 | 1657928 | KIT ligand                            | Kitlg | 60427  | 1,03 | up   |
| 6185781 | 7314316 | 1657926 | KIT ligand                            | Kitlg | 60427  | 1,15 | up   |
| 6256647 | 7314316 | 1657932 | KIT ligand                            | Kitlg | 60427  | 1,29 | down |
| 6305879 | 7314316 | 1657931 | KIT ligand                            | Kitlg | 60427  | 1,19 | up   |
| 6475667 | 7314316 | 1657934 | KIT ligand                            | Kitlg | 60427  | 1,47 | up   |
| 6598598 | 7314316 | 1657927 | KIT ligand                            | Kitlg | 60427  | 1,30 | up   |
| 6690842 | 7314316 | 1657935 | KIT ligand                            | Kitlg | 60427  | 1,78 | down |
| 5813008 | 7099669 | 1126927 | Klotho                                | Kl    | 83504  | 1,36 | down |
| 6098520 | 7099669 | 1126926 | Klotho                                | Kl    | 83504  | 1,20 | up   |
| 6196624 | 7099669 | 1126923 | Klotho                                | Kl    | 83504  | 1,35 | up   |
| 6247831 | 7099669 | 1126927 | Klotho                                | Kl    | 83504  | 1,61 | down |
| 6356246 | 7099669 | 1126927 | Klotho                                | Kl    | 83504  | 1,39 | up   |
| 6442366 | 7099669 | 1126926 | Klotho                                | Kl    | 83504  | 2,13 | up   |
| 6471155 | 7099669 | 1126924 | Klotho                                | Kl    | 83504  | 1,04 | down |
| 6503501 | 7099669 | 1126925 | Klotho                                | Kl    | 83504  | 1,11 | down |
| 6680141 | 7099669 | 1126924 | Klotho                                | Kl    | 83504  | 1,57 | up   |
| 6689224 | 7099669 | 1126924 | Klotho                                | Kl    | 83504  | 1,17 | down |
| 5810205 | 7312942 | 1654177 | KN motif and ankyrin repeat domains 3 | Kank3 | 366848 | 1,18 | down |
| 5848495 | 7312942 | 1654170 | KN motif and ankyrin repeat domains 3 | Kank3 | 366848 | 1,22 | up   |
| 5956715 | 7312942 | 1654178 | KN motif and ankyrin repeat domains 3 | Kank3 | 366848 | 1,09 | down |
| 6119141 | 7312942 | 1654171 | KN motif and ankyrin repeat domains 3 | Kank3 | 366848 | 1,59 | down |
| 6121347 | 7312942 | 1654171 | KN motif and ankyrin repeat domains 3 | Kank3 | 366848 | 1,40 | down |
| 6272936 | 7312942 | 1654175 | KN motif and ankyrin repeat domains 3 | Kank3 | 366848 | 1,18 | down |
| 6304710 | 7312942 | 1654174 | KN motif and ankyrin repeat domains 3 | Kank3 | 366848 | 1,07 | down |
| 6316053 | 7312942 | 1654171 | KN motif and ankyrin repeat domains 3 | Kank3 | 366848 | 1,09 | up   |
| 6327140 | 7312942 | 1654172 | KN motif and ankyrin repeat domains 3 | Kank3 | 366848 | 1,14 | up   |
| 6356130 | 7312942 | 1654171 | KN motif and ankyrin repeat domains 3 | Kank3 | 366848 | 1,17 | up   |
| 6379330 | 7312942 | 1654176 | KN motif and ankyrin repeat domains 3 | Kank3 | 366848 | 1,25 | up   |
| 6410385 | 7312942 | 1654171 | KN motif and ankyrin repeat domains 3 | Kank3 | 366848 | 1,03 | up   |
| 6453934 | 7312942 | 1654171 | KN motif and ankyrin repeat domains 3 | Kank3 | 366848 | 1,12 | down |
| 6513539 | 7312942 | 1654171 | KN motif and ankyrin repeat domains 3 | Kank3 | 366848 | 1,22 | up   |
| 6552672 | 7312942 | 1654171 | KN motif and ankyrin repeat domains 3 | Kank3 | 366848 | 2,28 | down |
| 6603389 | 7312942 | 1654166 | KN motif and ankyrin repeat domains 3 | Kank3 | 366848 | 1,02 | down |
| 6654397 | 7312942 | 1654171 | KN motif and ankyrin repeat domains 3 | Kank3 | 366848 | 1,06 | up   |
| 5784466 | 7289069 | 1594400 | KN motif and ankyrin repeat domains 4 | Kank4 | 313385 | 1,35 | down |
| 5796720 | 7289069 | 1594398 | KN motif and ankyrin repeat domains 4 | Kank4 | 313385 | 1,02 | down |
| 5839540 | 7289069 | 1594402 | KN motif and ankyrin repeat domains 4 | Kank4 | 313385 | 1,41 | down |

|         |         |         |                                       |        |        |      |      |
|---------|---------|---------|---------------------------------------|--------|--------|------|------|
| 6052845 | 7289069 | 1594392 | KN motif and ankyrin repeat domains 4 | Kank4  | 313385 | 1,49 | up   |
| 6144230 | 7289069 | 1594397 | KN motif and ankyrin repeat domains 4 | Kank4  | 313385 | 1,62 | up   |
| 6144788 | 7289069 | 1594401 | KN motif and ankyrin repeat domains 4 | Kank4  | 313385 | 1,38 | down |
| 6242171 | 7289069 | 1594392 | KN motif and ankyrin repeat domains 4 | Kank4  | 313385 | 1,17 | down |
| 6424277 | 7289069 | 1594395 | KN motif and ankyrin repeat domains 4 | Kank4  | 313385 | 1,00 | up   |
| 6518856 | 7289069 | 1594394 | KN motif and ankyrin repeat domains 4 | Kank4  | 313385 | 1,02 | up   |
| 6720355 | 7289069 | 1594405 | KN motif and ankyrin repeat domains 4 | Kank4  | 313385 | 1,11 | up   |
| 5689610 | 7253408 | 1505932 | KRAB-A domain containing 1            | Krba1  | 362358 | 1,10 | up   |
| 5755244 | 7253408 | 1505954 | KRAB-A domain containing 1            | Krba1  | 362358 | 1,09 | up   |
| 6346726 | 7253408 | 1505932 | KRAB-A domain containing 1            | Krba1  | 362358 | 1,14 | down |
| 5821797 | 7261592 | 1526857 | KRIT1, ankyrin repeat containing      | Krit1  | 362317 | 1,09 | down |
| 5866324 | 7261592 | 1526845 | KRIT1, ankyrin repeat containing      | Krit1  | 362317 | 1,00 | up   |
| 5922063 | 7261592 | 1526854 | KRIT1, ankyrin repeat containing      | Krit1  | 362317 | 1,02 | down |
| 6032583 | 7261592 | 1526839 | KRIT1, ankyrin repeat containing      | Krit1  | 362317 | 1,29 | up   |
| 6074273 | 7261592 | 1526851 | KRIT1, ankyrin repeat containing      | Krit1  | 362317 | 1,23 | down |
| 6090626 | 7261592 | 1526843 | KRIT1, ankyrin repeat containing      | Krit1  | 362317 | 1,03 | down |
| 6221866 | 7261592 | 1526850 | KRIT1, ankyrin repeat containing      | Krit1  | 362317 | 1,02 | down |
| 6234477 | 7261592 | 1526847 | KRIT1, ankyrin repeat containing      | Krit1  | 362317 | 1,29 | down |
| 6253483 | 7261592 | 1526843 | KRIT1, ankyrin repeat containing      | Krit1  | 362317 | 1,07 | up   |
| 6293750 | 7261592 | 1526848 | KRIT1, ankyrin repeat containing      | Krit1  | 362317 | 1,08 | down |
| 6304740 | 7261592 | 1526844 | KRIT1, ankyrin repeat containing      | Krit1  | 362317 | 1,32 | down |
| 6321510 | 7261592 | 1526840 | KRIT1, ankyrin repeat containing      | Krit1  | 362317 | 1,07 | down |
| 6360184 | 7261592 | 1526852 | KRIT1, ankyrin repeat containing      | Krit1  | 362317 | 1,29 | down |
| 6411693 | 7261592 | 1526849 | KRIT1, ankyrin repeat containing      | Krit1  | 362317 | 1,21 | up   |
| 6463980 | 7261592 | 1526853 | KRIT1, ankyrin repeat containing      | Krit1  | 362317 | 1,09 | up   |
| 6494520 | 7261592 | 1526836 | KRIT1, ankyrin repeat containing      | Krit1  | 362317 | 1,22 | up   |
| 6494987 | 7261592 | 1526837 | KRIT1, ankyrin repeat containing      | Krit1  | 362317 | 1,08 | down |
| 6707379 | 7261592 | 1526841 | KRIT1, ankyrin repeat containing      | Krit1  | 362317 | 1,36 | up   |
| 5753518 | 7141061 | 1228648 | Kruppel-like factor 12                | Klf12  | 306110 | 1,27 | up   |
| 5844441 | 7141061 | 1228646 | Kruppel-like factor 12                | Klf12  | 306110 | 1,76 | up   |
| 5885458 | 7141061 | 1228645 | Kruppel-like factor 12                | Klf12  | 306110 | 1,11 | up   |
| 5967203 | 7141061 | 1228679 | Kruppel-like factor 12                | Klf12  | 306110 | 1,18 | up   |
| 6023906 | 7141061 | 1228709 | Kruppel-like factor 12                | Klf12  | 306110 | 1,01 | down |
| 6085448 | 7141061 | 1228645 | Kruppel-like factor 12                | Klf12  | 306110 | 1,33 | up   |
| 6137572 | 7141061 | 1228645 | Kruppel-like factor 12                | Klf12  | 306110 | 1,59 | down |
| 6202705 | 7141061 | 1228700 | Kruppel-like factor 12                | Klf12  | 306110 | 1,08 | down |
| 6227837 | 7141061 | 1228668 | Kruppel-like factor 12                | Klf12  | 306110 | 1,04 | down |
| 6302285 | 7141061 | 1228644 | Kruppel-like factor 12                | Klf12  | 306110 | 1,29 | down |
| 6360035 | 7141061 | 1228719 | Kruppel-like factor 12                | Klf12  | 306110 | 1,03 | up   |
| 6727013 | 7141061 | 1228687 | Kruppel-like factor 12                | Klf12  | 306110 | 1,38 | up   |
| 5746655 | 7134502 | 1212367 | Kruppel-like factor 5                 | Klf5   | 84410  | 2,49 | down |
| 6061838 | 7134502 | 1212366 | Kruppel-like factor 5                 | Klf5   | 84410  | 1,52 | up   |
| 6659288 | 7134502 | 1212365 | Kruppel-like factor 5                 | Klf5   | 84410  | 1,86 | up   |
| 6665352 | 7134502 | 1212365 | Kruppel-like factor 5                 | Klf5   | 84410  | 1,82 | up   |
| 6736781 | 7134502 | 1212364 | Kruppel-like factor 5                 | Klf5   | 84410  | 3,25 | down |
| 5759124 | 7166280 | 1289729 | Kruppel-like factor 6                 | Klf6   | 58954  | 1,06 | up   |
| 5789286 | 7166280 | 1289725 | Kruppel-like factor 6                 | Klf6   | 58954  | 1,04 | down |
| 5873800 | 7166280 | 1289727 | Kruppel-like factor 6                 | Klf6   | 58954  | 1,03 | up   |
| 6016178 | 7166280 | 1289724 | Kruppel-like factor 6                 | Klf6   | 58954  | 1,04 | up   |
| 6280446 | 7166280 | 1289728 | Kruppel-like factor 6                 | Klf6   | 58954  | 1,39 | up   |
| 6357287 | 7166280 | 1289725 | Kruppel-like factor 6                 | Klf6   | 58954  | 2,35 | down |
| 6470750 | 7166280 | 1289726 | Kruppel-like factor 6                 | Klf6   | 58954  | 1,69 | down |
| 6693689 | 7166280 | 1289725 | Kruppel-like factor 6                 | Klf6   | 58954  | 1,26 | down |
| 5623885 | 7076110 | 1070732 | Kv channel-interacting protein 1      | Kcnip1 | 65023  | 1,17 | down |
| 5695802 | 7076110 | 1070733 | Kv channel-interacting protein 1      | Kcnip1 | 65023  | 1,15 | up   |
| 5996505 | 7076110 | 1070729 | Kv channel-interacting protein 1      | Kcnip1 | 65023  | 2,14 | down |

|         |         |         |                                                       |         |        |      |      |
|---------|---------|---------|-------------------------------------------------------|---------|--------|------|------|
| 6061863 | 7076110 | 1070728 | Kv channel-interacting protein 1                      | Kcnipl  | 65023  | 1,14 | up   |
| 6266701 | 7076110 | 1070731 | Kv channel-interacting protein 1                      | Kcnipl  | 65023  | 1,04 | down |
| 6437595 | 7076110 | 1070727 | Kv channel-interacting protein 1                      | Kcnipl  | 65023  | 1,08 | up   |
| 6519802 | 7076110 | 1070734 | Kv channel-interacting protein 1                      | Kcnipl  | 65023  | 1,52 | up   |
| 6536289 | 7076110 | 1070730 | Kv channel-interacting protein 1                      | Kcnipl  | 65023  | 1,01 | down |
| 6704975 | 7076110 | 1070735 | Kv channel-interacting protein 1                      | Kcnipl  | 65023  | 1,11 | up   |
| 5662150 | 7063140 | 1039035 | Kv channel-interacting protein 2                      | Kcnipl2 | 56817  | 1,57 | down |
| 5749471 | 7063140 | 1039032 | Kv channel-interacting protein 2                      | Kcnipl2 | 56817  | 1,12 | down |
| 5778153 | 7063140 | 1039028 | Kv channel-interacting protein 2                      | Kcnipl2 | 56817  | 2,04 | down |
| 6041780 | 7063140 | 1039037 | Kv channel-interacting protein 2                      | Kcnipl2 | 56817  | 1,37 | down |
| 6044243 | 7063140 | 1039034 | Kv channel-interacting protein 2                      | Kcnipl2 | 56817  | 1,07 | down |
| 6253430 | 7063140 | 1039027 | Kv channel-interacting protein 2                      | Kcnipl2 | 56817  | 1,20 | up   |
| 6349941 | 7063140 | 1039027 | Kv channel-interacting protein 2                      | Kcnipl2 | 56817  | 1,36 | up   |
| 6459080 | 7063140 | 1039029 | Kv channel-interacting protein 2                      | Kcnipl2 | 56817  | 1,45 | down |
| 6489007 | 7063140 | 1039030 | Kv channel-interacting protein 2                      | Kcnipl2 | 56817  | 1,02 | up   |
| 6491972 | 7063140 | 1039033 | Kv channel-interacting protein 2                      | Kcnipl2 | 56817  | 1,49 | up   |
| 6519233 | 7063140 | 1039031 | Kv channel-interacting protein 2                      | Kcnipl2 | 56817  | 1,17 | down |
| 6708534 | 7063140 | 1039036 | Kv channel-interacting protein 2                      | Kcnipl2 | 56817  | 1,05 | down |
| 5735754 | 7108109 | 1147306 | kynurenine 3-monooxygenase (kynurenine 3-hydroxylase) | Kmo     | 59113  | 1,00 | up   |
| 5743640 | 7108109 | 1147313 | kynurenine 3-monooxygenase (kynurenine 3-hydroxylase) | Kmo     | 59113  | 1,12 | down |
| 5789901 | 7108109 | 1147315 | kynurenine 3-monooxygenase (kynurenine 3-hydroxylase) | Kmo     | 59113  | 1,04 | down |
| 5839257 | 7108109 | 1147304 | kynurenine 3-monooxygenase (kynurenine 3-hydroxylase) | Kmo     | 59113  | 1,11 | down |
| 5874204 | 7108109 | 1147309 | kynurenine 3-monooxygenase (kynurenine 3-hydroxylase) | Kmo     | 59113  | 1,08 | up   |
| 5880184 | 7108109 | 1147306 | kynurenine 3-monooxygenase (kynurenine 3-hydroxylase) | Kmo     | 59113  | 1,23 | up   |
| 5894534 | 7108109 | 1147311 | kynurenine 3-monooxygenase (kynurenine 3-hydroxylase) | Kmo     | 59113  | 1,08 | up   |
| 5925317 | 7108109 | 1147307 | kynurenine 3-monooxygenase (kynurenine 3-hydroxylase) | Kmo     | 59113  | 1,38 | down |
| 5949961 | 7108109 | 1147301 | kynurenine 3-monooxygenase (kynurenine 3-hydroxylase) | Kmo     | 59113  | 1,06 | down |
| 6077410 | 7108109 | 1147305 | kynurenine 3-monooxygenase (kynurenine 3-hydroxylase) | Kmo     | 59113  | 1,70 | up   |
| 6276911 | 7108109 | 1147314 | kynurenine 3-monooxygenase (kynurenine 3-hydroxylase) | Kmo     | 59113  | 1,05 | down |
| 6352221 | 7108109 | 1147308 | kynurenine 3-monooxygenase (kynurenine 3-hydroxylase) | Kmo     | 59113  | 1,06 | down |
| 6375502 | 7108109 | 1147302 | kynurenine 3-monooxygenase (kynurenine 3-hydroxylase) | Kmo     | 59113  | 1,05 | down |
| 6411258 | 7108109 | 1147303 | kynurenine 3-monooxygenase (kynurenine 3-hydroxylase) | Kmo     | 59113  | 1,05 | up   |
| 6703051 | 7108109 | 1147312 | kynurenine 3-monooxygenase (kynurenine 3-hydroxylase) | Kmo     | 59113  | 1,16 | up   |
| 6720764 | 7108109 | 1147310 | kynurenine 3-monooxygenase (kynurenine 3-hydroxylase) | Kmo     | 59113  | 2,04 | down |
| 5752339 | 7319144 | 1670085 | l(3)mbt-like 2 (Drosophila)                           | L3mbtl2 | 300320 | 1,30 | up   |
| 5763500 | 7319144 | 1670097 | l(3)mbt-like 2 (Drosophila)                           | L3mbtl2 | 300320 | 1,15 | down |
| 5768987 | 7319144 | 1670098 | l(3)mbt-like 2 (Drosophila)                           | L3mbtl2 | 300320 | 1,13 | down |
| 5804661 | 7319144 | 1670090 | l(3)mbt-like 2 (Drosophila)                           | L3mbtl2 | 300320 | 1,13 | down |
| 6171573 | 7319144 | 1670104 | l(3)mbt-like 2 (Drosophila)                           | L3mbtl2 | 300320 | 1,20 | down |
| 6172429 | 7319144 | 1670093 | l(3)mbt-like 2 (Drosophila)                           | L3mbtl2 | 300320 | 1,30 | up   |
| 6244166 | 7319144 | 1670088 | l(3)mbt-like 2 (Drosophila)                           | L3mbtl2 | 300320 | 1,28 | up   |
| 6281814 | 7319144 | 1670103 | l(3)mbt-like 2 (Drosophila)                           | L3mbtl2 | 300320 | 1,22 | up   |
| 6370848 | 7319144 | 1670089 | l(3)mbt-like 2 (Drosophila)                           | L3mbtl2 | 300320 | 1,22 | up   |
| 6417736 | 7319144 | 1670092 | l(3)mbt-like 2 (Drosophila)                           | L3mbtl2 | 300320 | 1,44 | down |
| 6422322 | 7319144 | 1670096 | l(3)mbt-like 2 (Drosophila)                           | L3mbtl2 | 300320 | 1,09 | down |
| 6491646 | 7319144 | 1670095 | l(3)mbt-like 2 (Drosophila)                           | L3mbtl2 | 300320 | 1,03 | down |
| 6505553 | 7319144 | 1670100 | l(3)mbt-like 2 (Drosophila)                           | L3mbtl2 | 300320 | 1,05 | down |
| 6514574 | 7319144 | 1670099 | l(3)mbt-like 2 (Drosophila)                           | L3mbtl2 | 300320 | 1,81 | up   |
| 6619186 | 7319144 | 1670091 | l(3)mbt-like 2 (Drosophila)                           | L3mbtl2 | 300320 | 1,11 | down |
| 6622397 | 7319144 | 1670104 | l(3)mbt-like 2 (Drosophila)                           | L3mbtl2 | 300320 | 1,08 | down |
| 6668282 | 7319144 | 1670101 | l(3)mbt-like 2 (Drosophila)                           | L3mbtl2 | 300320 | 2,32 | down |
| 6709881 | 7319144 | 1670093 | l(3)mbt-like 2 (Drosophila)                           | L3mbtl2 | 300320 | 1,40 | up   |
| 6730860 | 7319144 | 1670084 | l(3)mbt-like 2 (Drosophila)                           | L3mbtl2 | 300320 | 1,02 | up   |
| 5757123 | 7067828 | 1050799 | La ribonucleoprotein domain family, member 1          | Larp1   | 303158 | 1,06 | up   |
| 6316296 | 7067828 | 1050799 | La ribonucleoprotein domain family, member 1          | Larp1   | 303158 | 1,44 | down |
| 6631595 | 7067828 | 1050799 | La ribonucleoprotein domain family, member 1          | Larp1   | 303158 | 1,06 | down |

|         |         |         |                                   |        |        |      |      |
|---------|---------|---------|-----------------------------------|--------|--------|------|------|
| 5675435 | 7346989 | 1737519 | lactamase, beta                   | Lactb  | 300803 | 1,19 | up   |
| 5683512 | 7346989 | 1737522 | lactamase, beta                   | Lactb  | 300803 | 1,20 | down |
| 5977920 | 7346989 | 1737524 | lactamase, beta                   | Lactb  | 300803 | 1,15 | up   |
| 6032976 | 7346989 | 1737521 | lactamase, beta                   | Lactb  | 300803 | 1,17 | up   |
| 6307687 | 7346989 | 1737519 | lactamase, beta                   | Lactb  | 300803 | 1,05 | up   |
| 6318870 | 7346989 | 1737523 | lactamase, beta                   | Lactb  | 300803 | 1,25 | down |
| 6499616 | 7346989 | 1737525 | lactamase, beta                   | Lactb  | 300803 | 1,14 | down |
| 6519192 | 7346989 | 1737525 | lactamase, beta                   | Lactb  | 300803 | 1,03 | down |
| 6729792 | 7346989 | 1737521 | lactamase, beta                   | Lactb  | 300803 | 1,51 | up   |
| 5762153 | 7271828 | 1552281 | lactamase, beta 2                 | Lactb2 | 297768 | 1,12 | up   |
| 5895966 | 7271828 | 1552279 | lactamase, beta 2                 | Lactb2 | 297768 | 1,03 | down |
| 6044862 | 7271828 | 1552282 | lactamase, beta 2                 | Lactb2 | 297768 | 2,09 | down |
| 6139442 | 7271828 | 1552286 | lactamase, beta 2                 | Lactb2 | 297768 | 1,18 | down |
| 6241638 | 7271828 | 1552280 | lactamase, beta 2                 | Lactb2 | 297768 | 1,03 | up   |
| 6417786 | 7271828 | 1552279 | lactamase, beta 2                 | Lactb2 | 297768 | 1,34 | down |
| 6520665 | 7271828 | 1552287 | lactamase, beta 2                 | Lactb2 | 297768 | 1,05 | up   |
| 6549219 | 7271828 | 1552288 | lactamase, beta 2                 | Lactb2 | 297768 | 1,01 | up   |
| 5669572 | 7340766 | 1721944 | lactotransferrin                  | Ltf    | 301034 | 1,00 | up   |
| 5677179 | 7340766 | 1721954 | lactotransferrin                  | Ltf    | 301034 | 1,06 | down |
| 5767808 | 7340766 | 1721951 | lactotransferrin                  | Ltf    | 301034 | 1,01 | down |
| 5884669 | 7340766 | 1721940 | lactotransferrin                  | Ltf    | 301034 | 1,19 | down |
| 5907808 | 7340766 | 1721950 | lactotransferrin                  | Ltf    | 301034 | 1,01 | up   |
| 5931944 | 7340766 | 1721957 | lactotransferrin                  | Ltf    | 301034 | 1,04 | down |
| 6050260 | 7340766 | 1721958 | lactotransferrin                  | Ltf    | 301034 | 1,26 | up   |
| 6078164 | 7340766 | 1721958 | lactotransferrin                  | Ltf    | 301034 | 1,06 | up   |
| 6207589 | 7340766 | 1721945 | lactotransferrin                  | Ltf    | 301034 | 1,69 | down |
| 6271126 | 7340766 | 1721952 | lactotransferrin                  | Ltf    | 301034 | 1,09 | up   |
| 6280052 | 7340766 | 1721955 | lactotransferrin                  | Ltf    | 301034 | 1,32 | down |
| 6281574 | 7340766 | 1721959 | lactotransferrin                  | Ltf    | 301034 | 1,05 | up   |
| 6297625 | 7340766 | 1721948 | lactotransferrin                  | Ltf    | 301034 | 1,03 | up   |
| 6330829 | 7340766 | 1721942 | lactotransferrin                  | Ltf    | 301034 | 1,18 | down |
| 6397718 | 7340766 | 1721948 | lactotransferrin                  | Ltf    | 301034 | 2,21 | up   |
| 6441923 | 7340766 | 1721943 | lactotransferrin                  | Ltf    | 301034 | 1,11 | up   |
| 6475423 | 7340766 | 1721949 | lactotransferrin                  | Ltf    | 301034 | 1,01 | down |
| 6483840 | 7340766 | 1721949 | lactotransferrin                  | Ltf    | 301034 | 1,02 | down |
| 6523599 | 7340766 | 1721946 | lactotransferrin                  | Ltf    | 301034 | 1,00 | up   |
| 6541328 | 7340766 | 1721953 | lactotransferrin                  | Ltf    | 301034 | 1,18 | down |
| 6736043 | 7340766 | 1721947 | lactotransferrin                  | Ltf    | 301034 | 1,08 | up   |
| 5687182 | 7099449 | 1126374 | LAG1 homolog, ceramide synthase 4 | Lass4  | 304208 | 1,16 | down |
| 5941174 | 7099449 | 1126385 | LAG1 homolog, ceramide synthase 4 | Lass4  | 304208 | 1,07 | up   |
| 5991091 | 7099449 | 1126379 | LAG1 homolog, ceramide synthase 4 | Lass4  | 304208 | 1,16 | up   |
| 6042869 | 7099449 | 1126372 | LAG1 homolog, ceramide synthase 4 | Lass4  | 304208 | 1,03 | up   |
| 6084937 | 7099449 | 1126373 | LAG1 homolog, ceramide synthase 4 | Lass4  | 304208 | 2,57 | down |
| 6126859 | 7099449 | 1126374 | LAG1 homolog, ceramide synthase 4 | Lass4  | 304208 | 1,08 | up   |
| 6167358 | 7099449 | 1126374 | LAG1 homolog, ceramide synthase 4 | Lass4  | 304208 | 1,01 | down |
| 6211607 | 7099449 | 1126374 | LAG1 homolog, ceramide synthase 4 | Lass4  | 304208 | 1,21 | up   |
| 6305465 | 7099449 | 1126374 | LAG1 homolog, ceramide synthase 4 | Lass4  | 304208 | 1,29 | down |
| 6345687 | 7099449 | 1126372 | LAG1 homolog, ceramide synthase 4 | Lass4  | 304208 | 1,37 | up   |
| 6347002 | 7099449 | 1126376 | LAG1 homolog, ceramide synthase 4 | Lass4  | 304208 | 1,06 | down |
| 6448543 | 7099449 | 1126377 | LAG1 homolog, ceramide synthase 4 | Lass4  | 304208 | 1,10 | down |
| 6533695 | 7099449 | 1126375 | LAG1 homolog, ceramide synthase 4 | Lass4  | 304208 | 1,07 | up   |
| 6717551 | 7099449 | 1126372 | LAG1 homolog, ceramide synthase 4 | Lass4  | 304208 | 2,06 | up   |
| 5627892 | 7226232 | 1437727 | laminin gamma 3                   | Lamc3  | 311862 | 1,27 | up   |
| 5653946 | 7226232 | 1437718 | laminin gamma 3                   | Lamc3  | 311862 | 1,18 | down |
| 5673820 | 7226232 | 1437733 | laminin gamma 3                   | Lamc3  | 311862 | 1,23 | up   |
| 5718490 | 7226232 | 1437741 | laminin gamma 3                   | Lamc3  | 311862 | 1,34 | up   |

|         |         |         |                  |       |        |      |      |
|---------|---------|---------|------------------|-------|--------|------|------|
| 5721394 | 7226232 | 1437745 | laminin gamma 3  | Lamc3 | 311862 | 1,11 | up   |
| 5723982 | 7226232 | 1437734 | laminin gamma 3  | Lamc3 | 311862 | 1,08 | up   |
| 5826355 | 7226232 | 1437730 | laminin gamma 3  | Lamc3 | 311862 | 1,00 | up   |
| 5870999 | 7226232 | 1437713 | laminin gamma 3  | Lamc3 | 311862 | 1,30 | up   |
| 5871356 | 7226232 | 1437742 | laminin gamma 3  | Lamc3 | 311862 | 1,56 | down |
| 5874170 | 7226232 | 1437737 | laminin gamma 3  | Lamc3 | 311862 | 1,00 | down |
| 5898345 | 7226232 | 1437746 | laminin gamma 3  | Lamc3 | 311862 | 1,13 | up   |
| 5927868 | 7226232 | 1437722 | laminin gamma 3  | Lamc3 | 311862 | 1,07 | up   |
| 5990413 | 7226232 | 1437743 | laminin gamma 3  | Lamc3 | 311862 | 1,04 | up   |
| 6101661 | 7226232 | 1437737 | laminin gamma 3  | Lamc3 | 311862 | 1,10 | down |
| 6114281 | 7226232 | 1437747 | laminin gamma 3  | Lamc3 | 311862 | 1,02 | down |
| 6139943 | 7226232 | 1437724 | laminin gamma 3  | Lamc3 | 311862 | 1,15 | down |
| 6145824 | 7226232 | 1437727 | laminin gamma 3  | Lamc3 | 311862 | 1,65 | down |
| 6161816 | 7226232 | 1437735 | laminin gamma 3  | Lamc3 | 311862 | 1,59 | down |
| 6187228 | 7226232 | 1437723 | laminin gamma 3  | Lamc3 | 311862 | 1,10 | down |
| 6334460 | 7226232 | 1437716 | laminin gamma 3  | Lamc3 | 311862 | 1,05 | down |
| 6417463 | 7226232 | 1437725 | laminin gamma 3  | Lamc3 | 311862 | 1,17 | down |
| 6472139 | 7226232 | 1437721 | laminin gamma 3  | Lamc3 | 311862 | 1,14 | up   |
| 6505648 | 7226232 | 1437740 | laminin gamma 3  | Lamc3 | 311862 | 2,18 | up   |
| 6529683 | 7226232 | 1437719 | laminin gamma 3  | Lamc3 | 311862 | 1,16 | down |
| 6540474 | 7226232 | 1437729 | laminin gamma 3  | Lamc3 | 311862 | 1,96 | up   |
| 6543113 | 7226232 | 1437746 | laminin gamma 3  | Lamc3 | 311862 | 1,20 | down |
| 6620838 | 7226232 | 1437739 | laminin gamma 3  | Lamc3 | 311862 | 1,40 | down |
| 6623428 | 7226232 | 1437738 | laminin gamma 3  | Lamc3 | 311862 | 1,15 | down |
| 6635319 | 7226232 | 1437734 | laminin gamma 3  | Lamc3 | 311862 | 1,09 | up   |
| 6673092 | 7226232 | 1437741 | laminin gamma 3  | Lamc3 | 311862 | 1,04 | up   |
| 6675751 | 7226232 | 1437744 | laminin gamma 3  | Lamc3 | 311862 | 1,40 | down |
| 6679166 | 7226232 | 1437732 | laminin gamma 3  | Lamc3 | 311862 | 1,19 | up   |
| 6686204 | 7226232 | 1437715 | laminin gamma 3  | Lamc3 | 311862 | 1,14 | down |
| 6736304 | 7226232 | 1437720 | laminin gamma 3  | Lamc3 | 311862 | 1,19 | up   |
| 5633483 | 7358623 | 1766281 | laminin, alpha 1 | Lama1 | 316758 | 1,50 | up   |
| 5653247 | 7358623 | 1766265 | laminin, alpha 1 | Lama1 | 316758 | 1,12 | up   |
| 5665304 | 7358623 | 1766280 | laminin, alpha 1 | Lama1 | 316758 | 1,55 | down |
| 5674321 | 7358623 | 1766236 | laminin, alpha 1 | Lama1 | 316758 | 1,03 | up   |
| 5676497 | 7358623 | 1766253 | laminin, alpha 1 | Lama1 | 316758 | 1,02 | up   |
| 5693949 | 7358623 | 1766305 | laminin, alpha 1 | Lama1 | 316758 | 1,64 | down |
| 5703347 | 7358623 | 1766270 | laminin, alpha 1 | Lama1 | 316758 | 1,08 | up   |
| 5730380 | 7358623 | 1766288 | laminin, alpha 1 | Lama1 | 316758 | 1,35 | up   |
| 5756389 | 7358623 | 1766284 | laminin, alpha 1 | Lama1 | 316758 | 1,04 | down |
| 5769353 | 7358623 | 1766285 | laminin, alpha 1 | Lama1 | 316758 | 1,02 | up   |
| 5771197 | 7358623 | 1766298 | laminin, alpha 1 | Lama1 | 316758 | 1,07 | down |
| 5794097 | 7358623 | 1766259 | laminin, alpha 1 | Lama1 | 316758 | 1,24 | up   |
| 5799246 | 7358623 | 1766276 | laminin, alpha 1 | Lama1 | 316758 | 1,01 | down |
| 5800274 | 7358623 | 1766295 | laminin, alpha 1 | Lama1 | 316758 | 1,00 | up   |
| 5804810 | 7358623 | 1766291 | laminin, alpha 1 | Lama1 | 316758 | 1,03 | up   |
| 5807196 | 7358623 | 1766258 | laminin, alpha 1 | Lama1 | 316758 | 1,12 | up   |
| 5807297 | 7358623 | 1766305 | laminin, alpha 1 | Lama1 | 316758 | 1,09 | down |
| 5834216 | 7358623 | 1766282 | laminin, alpha 1 | Lama1 | 316758 | 1,48 | down |
| 5877894 | 7358623 | 1766271 | laminin, alpha 1 | Lama1 | 316758 | 1,09 | up   |
| 5882015 | 7358623 | 1766294 | laminin, alpha 1 | Lama1 | 316758 | 1,02 | down |
| 5900262 | 7358623 | 1766296 | laminin, alpha 1 | Lama1 | 316758 | 1,45 | up   |
| 5902560 | 7358623 | 1766286 | laminin, alpha 1 | Lama1 | 316758 | 1,57 | up   |
| 5917090 | 7358623 | 1766249 | laminin, alpha 1 | Lama1 | 316758 | 1,20 | down |
| 5917450 | 7358623 | 1766287 | laminin, alpha 1 | Lama1 | 316758 | 1,14 | down |
| 5919580 | 7358623 | 1766268 | laminin, alpha 1 | Lama1 | 316758 | 1,22 | down |
| 5930077 | 7358623 | 1766248 | laminin, alpha 1 | Lama1 | 316758 | 1,88 | down |

|         |         |         |                  |       |        |      |      |
|---------|---------|---------|------------------|-------|--------|------|------|
| 5930980 | 7358623 | 1766263 | laminin, alpha 1 | Lama1 | 316758 | 1,00 | up   |
| 5952072 | 7358623 | 1766274 | laminin, alpha 1 | Lama1 | 316758 | 1,09 | down |
| 5952264 | 7358623 | 1766248 | laminin, alpha 1 | Lama1 | 316758 | 1,15 | up   |
| 5956110 | 7358623 | 1766262 | laminin, alpha 1 | Lama1 | 316758 | 1,18 | down |
| 5993295 | 7358623 | 1766258 | laminin, alpha 1 | Lama1 | 316758 | 1,07 | down |
| 6008925 | 7358623 | 1766246 | laminin, alpha 1 | Lama1 | 316758 | 2,16 | down |
| 6019379 | 7358623 | 1766262 | laminin, alpha 1 | Lama1 | 316758 | 2,28 | down |
| 6037784 | 7358623 | 1766304 | laminin, alpha 1 | Lama1 | 316758 | 1,88 | up   |
| 6043330 | 7358623 | 1766301 | laminin, alpha 1 | Lama1 | 316758 | 1,15 | up   |
| 6051684 | 7358623 | 1766260 | laminin, alpha 1 | Lama1 | 316758 | 1,02 | up   |
| 6065005 | 7358623 | 1766266 | laminin, alpha 1 | Lama1 | 316758 | 1,03 | up   |
| 6066326 | 7358623 | 1766255 | laminin, alpha 1 | Lama1 | 316758 | 1,06 | up   |
| 6098480 | 7358623 | 1766267 | laminin, alpha 1 | Lama1 | 316758 | 1,21 | up   |
| 6101098 | 7358623 | 1766273 | laminin, alpha 1 | Lama1 | 316758 | 1,13 | down |
| 6148189 | 7358623 | 1766305 | laminin, alpha 1 | Lama1 | 316758 | 1,01 | down |
| 6197447 | 7358623 | 1766239 | laminin, alpha 1 | Lama1 | 316758 | 1,02 | down |
| 6230164 | 7358623 | 1766290 | laminin, alpha 1 | Lama1 | 316758 | 1,36 | up   |
| 6244177 | 7358623 | 1766240 | laminin, alpha 1 | Lama1 | 316758 | 1,17 | up   |
| 6252328 | 7358623 | 1766265 | laminin, alpha 1 | Lama1 | 316758 | 1,37 | up   |
| 6255998 | 7358623 | 1766227 | laminin, alpha 1 | Lama1 | 316758 | 1,49 | down |
| 6292839 | 7358623 | 1766256 | laminin, alpha 1 | Lama1 | 316758 | 1,23 | up   |
| 6314169 | 7358623 | 1766250 | laminin, alpha 1 | Lama1 | 316758 | 1,14 | up   |
| 6339632 | 7358623 | 1766292 | laminin, alpha 1 | Lama1 | 316758 | 1,00 | up   |
| 6346246 | 7358623 | 1766275 | laminin, alpha 1 | Lama1 | 316758 | 1,41 | down |
| 6362044 | 7358623 | 1766293 | laminin, alpha 1 | Lama1 | 316758 | 1,50 | down |
| 6371915 | 7358623 | 1766289 | laminin, alpha 1 | Lama1 | 316758 | 1,21 | down |
| 6372275 | 7358623 | 1766297 | laminin, alpha 1 | Lama1 | 316758 | 1,00 | down |
| 6394869 | 7358623 | 1766300 | laminin, alpha 1 | Lama1 | 316758 | 1,13 | up   |
| 6404872 | 7358623 | 1766275 | laminin, alpha 1 | Lama1 | 316758 | 1,04 | up   |
| 6409411 | 7358623 | 1766244 | laminin, alpha 1 | Lama1 | 316758 | 1,02 | down |
| 6422018 | 7358623 | 1766269 | laminin, alpha 1 | Lama1 | 316758 | 1,45 | up   |
| 6432211 | 7358623 | 1766245 | laminin, alpha 1 | Lama1 | 316758 | 1,25 | down |
| 6442787 | 7358623 | 1766272 | laminin, alpha 1 | Lama1 | 316758 | 1,30 | up   |
| 6454929 | 7358623 | 1766271 | laminin, alpha 1 | Lama1 | 316758 | 1,34 | down |
| 6470483 | 7358623 | 1766299 | laminin, alpha 1 | Lama1 | 316758 | 1,53 | up   |
| 6508730 | 7358623 | 1766251 | laminin, alpha 1 | Lama1 | 316758 | 1,03 | down |
| 6544412 | 7358623 | 1766277 | laminin, alpha 1 | Lama1 | 316758 | 1,42 | down |
| 6599563 | 7358623 | 1766247 | laminin, alpha 1 | Lama1 | 316758 | 2,23 | down |
| 6613934 | 7358623 | 1766235 | laminin, alpha 1 | Lama1 | 316758 | 1,17 | up   |
| 6628945 | 7358623 | 1766241 | laminin, alpha 1 | Lama1 | 316758 | 1,08 | down |
| 6650520 | 7358623 | 1766228 | laminin, alpha 1 | Lama1 | 316758 | 1,06 | down |
| 6681138 | 7358623 | 1766264 | laminin, alpha 1 | Lama1 | 316758 | 1,72 | up   |
| 6687681 | 7358623 | 1766278 | laminin, alpha 1 | Lama1 | 316758 | 1,69 | down |
| 6699358 | 7358623 | 1766261 | laminin, alpha 1 | Lama1 | 316758 | 1,18 | up   |
| 6706525 | 7358623 | 1766283 | laminin, alpha 1 | Lama1 | 316758 | 1,23 | down |
| 6726345 | 7358623 | 1766256 | laminin, alpha 1 | Lama1 | 316758 | 1,01 | up   |
| 5989896 | 7025652 | 950359  | laminin, alpha 2 | Lama2 | 309368 | 1,16 | down |
| 6182908 | 7025652 | 950220  | laminin, alpha 2 | Lama2 | 309368 | 1,13 | down |
| 5671617 | 7248790 | 1494501 | laminin, alpha 5 | Lama5 | 140433 | 1,07 | up   |
| 5876580 | 7248790 | 1494500 | laminin, alpha 5 | Lama5 | 140433 | 1,25 | down |
| 6012919 | 7248790 | 1494501 | laminin, alpha 5 | Lama5 | 140433 | 1,31 | up   |
| 6079005 | 7248790 | 1494502 | laminin, alpha 5 | Lama5 | 140433 | 1,33 | down |
| 6632131 | 7248790 | 1494501 | laminin, alpha 5 | Lama5 | 140433 | 1,16 | up   |
| 5641066 | 7297154 | 1614239 | laminin, beta 1  | Lamb1 | 298941 | 1,07 | down |
| 5663302 | 7297154 | 1614227 | laminin, beta 1  | Lamb1 | 298941 | 1,69 | down |
| 5704861 | 7297154 | 1614215 | laminin, beta 1  | Lamb1 | 298941 | 1,05 | up   |

|         |         |         |                 |       |        |      |      |
|---------|---------|---------|-----------------|-------|--------|------|------|
| 5769804 | 7297154 | 1614214 | laminin, beta 1 | Lamb1 | 298941 | 1,13 | down |
| 5797131 | 7297154 | 1614254 | laminin, beta 1 | Lamb1 | 298941 | 1,34 | down |
| 5826587 | 7297154 | 1614257 | laminin, beta 1 | Lamb1 | 298941 | 1,04 | up   |
| 5892168 | 7297154 | 1614219 | laminin, beta 1 | Lamb1 | 298941 | 1,34 | up   |
| 5917956 | 7297154 | 1614214 | laminin, beta 1 | Lamb1 | 298941 | 2,18 | up   |
| 5930261 | 7297154 | 1614240 | laminin, beta 1 | Lamb1 | 298941 | 1,02 | up   |
| 5947343 | 7297154 | 1614230 | laminin, beta 1 | Lamb1 | 298941 | 1,11 | up   |
| 5993721 | 7297154 | 1614229 | laminin, beta 1 | Lamb1 | 298941 | 1,49 | down |
| 6000723 | 7297154 | 1614237 | laminin, beta 1 | Lamb1 | 298941 | 1,34 | up   |
| 6026634 | 7297154 | 1614214 | laminin, beta 1 | Lamb1 | 298941 | 1,00 | up   |
| 6035500 | 7297154 | 1614235 | laminin, beta 1 | Lamb1 | 298941 | 1,21 | down |
| 6043037 | 7297154 | 1614223 | laminin, beta 1 | Lamb1 | 298941 | 1,01 | up   |
| 6103996 | 7297154 | 1614250 | laminin, beta 1 | Lamb1 | 298941 | 1,10 | down |
| 6190317 | 7297154 | 1614236 | laminin, beta 1 | Lamb1 | 298941 | 1,40 | up   |
| 6212736 | 7297154 | 1614249 | laminin, beta 1 | Lamb1 | 298941 | 1,12 | down |
| 6267497 | 7297154 | 1614260 | laminin, beta 1 | Lamb1 | 298941 | 1,03 | up   |
| 6284037 | 7297154 | 1614255 | laminin, beta 1 | Lamb1 | 298941 | 1,02 | down |
| 6351481 | 7297154 | 1614231 | laminin, beta 1 | Lamb1 | 298941 | 2,00 | up   |
| 6360439 | 7297154 | 1614218 | laminin, beta 1 | Lamb1 | 298941 | 1,35 | down |
| 6373795 | 7297154 | 1614259 | laminin, beta 1 | Lamb1 | 298941 | 1,04 | up   |
| 6400545 | 7297154 | 1614239 | laminin, beta 1 | Lamb1 | 298941 | 1,12 | down |
| 6406051 | 7297154 | 1614253 | laminin, beta 1 | Lamb1 | 298941 | 1,39 | up   |
| 6419943 | 7297154 | 1614248 | laminin, beta 1 | Lamb1 | 298941 | 1,06 | down |
| 6459009 | 7297154 | 1614260 | laminin, beta 1 | Lamb1 | 298941 | 1,33 | up   |
| 6486841 | 7297154 | 1614222 | laminin, beta 1 | Lamb1 | 298941 | 1,05 | up   |
| 6500973 | 7297154 | 1614234 | laminin, beta 1 | Lamb1 | 298941 | 1,06 | down |
| 6554531 | 7297154 | 1614238 | laminin, beta 1 | Lamb1 | 298941 | 1,09 | down |
| 6617807 | 7297154 | 1614228 | laminin, beta 1 | Lamb1 | 298941 | 1,16 | down |
| 6621109 | 7297154 | 1614260 | laminin, beta 1 | Lamb1 | 298941 | 1,10 | up   |
| 6638035 | 7297154 | 1614226 | laminin, beta 1 | Lamb1 | 298941 | 1,03 | up   |
| 6668478 | 7297154 | 1614243 | laminin, beta 1 | Lamb1 | 298941 | 1,20 | up   |
| 6715071 | 7297154 | 1614259 | laminin, beta 1 | Lamb1 | 298941 | 1,13 | up   |
| 6736033 | 7297154 | 1614242 | laminin, beta 1 | Lamb1 | 298941 | 1,02 | up   |
| 5705414 | 7154191 | 1260805 | laminin, beta 2 | Lamb2 | 25473  | 1,09 | down |
| 5730711 | 7154191 | 1260790 | laminin, beta 2 | Lamb2 | 25473  | 1,27 | down |
| 5744617 | 7154191 | 1260804 | laminin, beta 2 | Lamb2 | 25473  | 1,01 | up   |
| 5782656 | 7154191 | 1260817 | laminin, beta 2 | Lamb2 | 25473  | 1,96 | down |
| 5787648 | 7154191 | 1260818 | laminin, beta 2 | Lamb2 | 25473  | 1,05 | down |
| 5804940 | 7154191 | 1260802 | laminin, beta 2 | Lamb2 | 25473  | 1,26 | up   |
| 5811757 | 7154191 | 1260816 | laminin, beta 2 | Lamb2 | 25473  | 1,05 | up   |
| 5859406 | 7154191 | 1260799 | laminin, beta 2 | Lamb2 | 25473  | 1,81 | up   |
| 5884603 | 7154191 | 1260812 | laminin, beta 2 | Lamb2 | 25473  | 1,15 | down |
| 5913667 | 7154191 | 1260820 | laminin, beta 2 | Lamb2 | 25473  | 1,53 | down |
| 5958410 | 7154191 | 1260806 | laminin, beta 2 | Lamb2 | 25473  | 1,03 | down |
| 5981790 | 7154191 | 1260796 | laminin, beta 2 | Lamb2 | 25473  | 1,76 | up   |
| 6031301 | 7154191 | 1260820 | laminin, beta 2 | Lamb2 | 25473  | 1,10 | down |
| 6043531 | 7154191 | 1260814 | laminin, beta 2 | Lamb2 | 25473  | 1,04 | up   |
| 6145996 | 7154191 | 1260791 | laminin, beta 2 | Lamb2 | 25473  | 1,25 | up   |
| 6175174 | 7154191 | 1260803 | laminin, beta 2 | Lamb2 | 25473  | 2,46 | up   |
| 6205441 | 7154191 | 1260793 | laminin, beta 2 | Lamb2 | 25473  | 1,23 | up   |
| 6208891 | 7154191 | 1260810 | laminin, beta 2 | Lamb2 | 25473  | 1,02 | up   |
| 6231266 | 7154191 | 1260809 | laminin, beta 2 | Lamb2 | 25473  | 2,33 | up   |
| 6236885 | 7154191 | 1260806 | laminin, beta 2 | Lamb2 | 25473  | 1,54 | down |
| 6243854 | 7154191 | 1260792 | laminin, beta 2 | Lamb2 | 25473  | 1,06 | up   |
| 6277004 | 7154191 | 1260816 | laminin, beta 2 | Lamb2 | 25473  | 1,11 | down |
| 6302667 | 7154191 | 1260807 | laminin, beta 2 | Lamb2 | 25473  | 1,28 | down |



|         |         |         |                                                          |       |        |      |      |
|---------|---------|---------|----------------------------------------------------------|-------|--------|------|------|
| 6309408 | 7154191 | 1260795 | laminin, beta 2                                          | Lamb2 | 25473  | 1,18 | up   |
| 6355968 | 7154191 | 1260794 | laminin, beta 2                                          | Lamb2 | 25473  | 1,22 | up   |
| 6369439 | 7154191 | 1260815 | laminin, beta 2                                          | Lamb2 | 25473  | 1,19 | down |
| 6408764 | 7154191 | 1260816 | laminin, beta 2                                          | Lamb2 | 25473  | 1,45 | up   |
| 6412189 | 7154191 | 1260797 | laminin, beta 2                                          | Lamb2 | 25473  | 1,14 | up   |
| 6432442 | 7154191 | 1260808 | laminin, beta 2                                          | Lamb2 | 25473  | 2,05 | down |
| 6483443 | 7154191 | 1260811 | laminin, beta 2                                          | Lamb2 | 25473  | 2,06 | down |
| 6484275 | 7154191 | 1260813 | laminin, beta 2                                          | Lamb2 | 25473  | 1,05 | up   |
| 6515171 | 7154191 | 1260800 | laminin, beta 2                                          | Lamb2 | 25473  | 1,05 | up   |
| 6536321 | 7154191 | 1260801 | laminin, beta 2                                          | Lamb2 | 25473  | 1,20 | up   |
| 6567880 | 7154191 | 1260816 | laminin, beta 2                                          | Lamb2 | 25473  | 1,05 | down |
| 6600014 | 7154191 | 1260819 | laminin, beta 2                                          | Lamb2 | 25473  | 1,20 | up   |
| 6634063 | 7154191 | 1260813 | laminin, beta 2                                          | Lamb2 | 25473  | 1,01 | down |
| 6638953 | 7154191 | 1260820 | laminin, beta 2                                          | Lamb2 | 25473  | 1,43 | down |
| 6691219 | 7154191 | 1260798 | laminin, beta 2                                          | Lamb2 | 25473  | 1,11 | up   |
| 6720315 | 7154191 | 1260789 | laminin, beta 2                                          | Lamb2 | 25473  | 1,29 | up   |
| 6734963 | 7154191 | 1260813 | laminin, beta 2                                          | Lamb2 | 25473  | 1,22 | down |
| 5625928 | 7088973 | 1100897 | large subunit GTPase 1 homolog (S. cerevisiae)           | Lsg1  | 288029 | 1,19 | down |
| 5834974 | 7088973 | 1100906 | large subunit GTPase 1 homolog (S. cerevisiae)           | Lsg1  | 288029 | 1,16 | up   |
| 5861374 | 7088973 | 1100896 | large subunit GTPase 1 homolog (S. cerevisiae)           | Lsg1  | 288029 | 1,35 | down |
| 5882860 | 7088973 | 1100901 | large subunit GTPase 1 homolog (S. cerevisiae)           | Lsg1  | 288029 | 1,20 | down |
| 5954745 | 7088973 | 1100904 | large subunit GTPase 1 homolog (S. cerevisiae)           | Lsg1  | 288029 | 1,10 | down |
| 5968036 | 7088973 | 1100906 | large subunit GTPase 1 homolog (S. cerevisiae)           | Lsg1  | 288029 | 1,62 | down |
| 6332494 | 7088973 | 1100905 | large subunit GTPase 1 homolog (S. cerevisiae)           | Lsg1  | 288029 | 1,53 | up   |
| 6343935 | 7088973 | 1100900 | large subunit GTPase 1 homolog (S. cerevisiae)           | Lsg1  | 288029 | 1,17 | down |
| 6364827 | 7088973 | 1100898 | large subunit GTPase 1 homolog (S. cerevisiae)           | Lsg1  | 288029 | 1,17 | down |
| 6371759 | 7088973 | 1100902 | large subunit GTPase 1 homolog (S. cerevisiae)           | Lsg1  | 288029 | 1,61 | up   |
| 6400493 | 7088973 | 1100894 | large subunit GTPase 1 homolog (S. cerevisiae)           | Lsg1  | 288029 | 1,04 | up   |
| 6423675 | 7088973 | 1100905 | large subunit GTPase 1 homolog (S. cerevisiae)           | Lsg1  | 288029 | 1,13 | up   |
| 6456234 | 7088973 | 1100906 | large subunit GTPase 1 homolog (S. cerevisiae)           | Lsg1  | 288029 | 1,16 | up   |
| 6486277 | 7088973 | 1100895 | large subunit GTPase 1 homolog (S. cerevisiae)           | Lsg1  | 288029 | 1,29 | up   |
| 6581381 | 7088973 | 1100899 | large subunit GTPase 1 homolog (S. cerevisiae)           | Lsg1  | 288029 | 1,29 | down |
| 6650492 | 7088973 | 1100906 | large subunit GTPase 1 homolog (S. cerevisiae)           | Lsg1  | 288029 | 1,10 | down |
| 6669974 | 7088973 | 1100892 | large subunit GTPase 1 homolog (S. cerevisiae)           | Lsg1  | 288029 | 1,38 | up   |
| 6716145 | 7088973 | 1100903 | large subunit GTPase 1 homolog (S. cerevisiae)           | Lsg1  | 288029 | 1,12 | up   |
| 6727473 | 7088973 | 1100893 | large subunit GTPase 1 homolog (S. cerevisiae)           | Lsg1  | 288029 | 2,34 | down |
| 5876702 | 7039223 | 983557  | latent transforming growth factor beta binding protein 3 | Ltbp3 | 83838  | 1,12 | up   |
| 6128071 | 7039223 | 983557  | latent transforming growth factor beta binding protein 3 | Ltbp3 | 83838  | 1,19 | down |
| 6138868 | 7039223 | 983557  | latent transforming growth factor beta binding protein 3 | Ltbp3 | 83838  | 1,08 | up   |
| 6537695 | 7039223 | 983559  | latent transforming growth factor beta binding protein 3 | Ltbp3 | 83838  | 1,31 | down |
| 6568422 | 7039223 | 983558  | latent transforming growth factor beta binding protein 3 | Ltbp3 | 83838  | 1,28 | down |
| 5660100 | 7049118 | 1007777 | latent transforming growth factor beta binding protein 4 | Ltbp4 | 292734 | 1,04 | down |
| 5660829 | 7049118 | 1007761 | latent transforming growth factor beta binding protein 4 | Ltbp4 | 292734 | 1,11 | up   |
| 5714971 | 7049118 | 1007796 | latent transforming growth factor beta binding protein 4 | Ltbp4 | 292734 | 1,14 | up   |
| 5757094 | 7049118 | 1007767 | latent transforming growth factor beta binding protein 4 | Ltbp4 | 292734 | 1,11 | down |
| 5797827 | 7049118 | 1007773 | latent transforming growth factor beta binding protein 4 | Ltbp4 | 292734 | 1,74 | down |
| 5846126 | 7049118 | 1007774 | latent transforming growth factor beta binding protein 4 | Ltbp4 | 292734 | 1,01 | up   |
| 5874338 | 7049118 | 1007771 | latent transforming growth factor beta binding protein 4 | Ltbp4 | 292734 | 1,08 | up   |
| 5893711 | 7049118 | 1007783 | latent transforming growth factor beta binding protein 4 | Ltbp4 | 292734 | 1,57 | down |
| 5896465 | 7049118 | 1007763 | latent transforming growth factor beta binding protein 4 | Ltbp4 | 292734 | 1,29 | up   |
| 5916122 | 7049118 | 1007765 | latent transforming growth factor beta binding protein 4 | Ltbp4 | 292734 | 1,13 | up   |
| 5916817 | 7049118 | 1007769 | latent transforming growth factor beta binding protein 4 | Ltbp4 | 292734 | 1,71 | up   |
| 5969716 | 7049118 | 1007787 | latent transforming growth factor beta binding protein 4 | Ltbp4 | 292734 | 1,02 | up   |
| 6051526 | 7049118 | 1007781 | latent transforming growth factor beta binding protein 4 | Ltbp4 | 292734 | 1,19 | up   |
| 6064529 | 7049118 | 1007764 | latent transforming growth factor beta binding protein 4 | Ltbp4 | 292734 | 1,36 | down |
| 6079760 | 7049118 | 1007778 | latent transforming growth factor beta binding protein 4 | Ltbp4 | 292734 | 1,21 | down |

|         |         |         |                                                          |            |        |      |      |
|---------|---------|---------|----------------------------------------------------------|------------|--------|------|------|
| 6097264 | 7049118 | 1007780 | latent transforming growth factor beta binding protein 4 | Ltbp4      | 292734 | 1,04 | up   |
| 6115471 | 7049118 | 1007781 | latent transforming growth factor beta binding protein 4 | Ltbp4      | 292734 | 1,02 | up   |
| 6125066 | 7049118 | 1007775 | latent transforming growth factor beta binding protein 4 | Ltbp4      | 292734 | 1,22 | up   |
| 6146091 | 7049118 | 1007781 | latent transforming growth factor beta binding protein 4 | Ltbp4      | 292734 | 2,27 | down |
| 6163004 | 7049118 | 1007759 | latent transforming growth factor beta binding protein 4 | Ltbp4      | 292734 | 1,41 | up   |
| 6221324 | 7049118 | 1007778 | latent transforming growth factor beta binding protein 4 | Ltbp4      | 292734 | 1,71 | down |
| 6243864 | 7049118 | 1007762 | latent transforming growth factor beta binding protein 4 | Ltbp4      | 292734 | 1,35 | down |
| 6254793 | 7049118 | 1007784 | latent transforming growth factor beta binding protein 4 | Ltbp4      | 292734 | 1,27 | up   |
| 6261248 | 7049118 | 1007766 | latent transforming growth factor beta binding protein 4 | Ltbp4      | 292734 | 1,27 | down |
| 6285083 | 7049118 | 1007785 | latent transforming growth factor beta binding protein 4 | Ltbp4      | 292734 | 1,17 | down |
| 6297652 | 7049118 | 1007763 | latent transforming growth factor beta binding protein 4 | Ltbp4      | 292734 | 1,07 | down |
| 6309086 | 7049118 | 1007794 | latent transforming growth factor beta binding protein 4 | Ltbp4      | 292734 | 1,09 | down |
| 6328252 | 7049118 | 1007782 | latent transforming growth factor beta binding protein 4 | Ltbp4      | 292734 | 1,69 | up   |
| 6357692 | 7049118 | 1007776 | latent transforming growth factor beta binding protein 4 | Ltbp4      | 292734 | 1,26 | down |
| 6411982 | 7049118 | 1007786 | latent transforming growth factor beta binding protein 4 | Ltbp4      | 292734 | 2,21 | down |
| 6421128 | 7049118 | 1007795 | latent transforming growth factor beta binding protein 4 | Ltbp4      | 292734 | 1,05 | down |
| 6433602 | 7049118 | 1007768 | latent transforming growth factor beta binding protein 4 | Ltbp4      | 292734 | 1,57 | down |
| 6488723 | 7049118 | 1007767 | latent transforming growth factor beta binding protein 4 | Ltbp4      | 292734 | 1,53 | down |
| 6561127 | 7049118 | 1007787 | latent transforming growth factor beta binding protein 4 | Ltbp4      | 292734 | 1,00 | up   |
| 6567641 | 7049118 | 1007777 | latent transforming growth factor beta binding protein 4 | Ltbp4      | 292734 | 1,23 | up   |
| 6657539 | 7049118 | 1007780 | latent transforming growth factor beta binding protein 4 | Ltbp4      | 292734 | 1,28 | up   |
| 6699038 | 7049118 | 1007759 | latent transforming growth factor beta binding protein 4 | Ltbp4      | 292734 | 1,04 | down |
| 6701888 | 7049118 | 1007779 | latent transforming growth factor beta binding protein 4 | Ltbp4      | 292734 | 1,31 | down |
| 6720408 | 7049118 | 1007770 | latent transforming growth factor beta binding protein 4 | Ltbp4      | 292734 | 1,00 | up   |
| 6733632 | 7049118 | 1007772 | latent transforming growth factor beta binding protein 4 | Ltbp4      | 292734 | 1,04 | up   |
| 5630083 | 7184188 | 1336058 | latrophilin 1                                            | Lphn1      | 65096  | 1,17 | up   |
| 5655929 | 7184188 | 1336045 | latrophilin 1                                            | Lphn1      | 65096  | 1,26 | down |
| 5699762 | 7184188 | 1336043 | latrophilin 1                                            | Lphn1      | 65096  | 1,23 | down |
| 5709968 | 7184188 | 1336056 | latrophilin 1                                            | Lphn1      | 65096  | 1,36 | down |
| 5719895 | 7184188 | 1336047 | latrophilin 1                                            | Lphn1      | 65096  | 1,08 | down |
| 5754151 | 7184188 | 1336045 | latrophilin 1                                            | Lphn1      | 65096  | 2,17 | down |
| 5810547 | 7184188 | 1336059 | latrophilin 1                                            | Lphn1      | 65096  | 1,15 | down |
| 5816837 | 7184188 | 1336054 | latrophilin 1                                            | Lphn1      | 65096  | 1,01 | up   |
| 5827216 | 7184188 | 1336052 | latrophilin 1                                            | Lphn1      | 65096  | 1,01 | up   |
| 5880551 | 7184188 | 1336053 | latrophilin 1                                            | Lphn1      | 65096  | 1,01 | down |
| 5883676 | 7184188 | 1336064 | latrophilin 1                                            | Lphn1      | 65096  | 1,36 | up   |
| 5897555 | 7184188 | 1336050 | latrophilin 1                                            | Lphn1      | 65096  | 1,18 | down |
| 5906089 | 7184188 | 1336062 | latrophilin 1                                            | Lphn1      | 65096  | 1,08 | up   |
| 5935319 | 7184188 | 1336051 | latrophilin 1                                            | Lphn1      | 65096  | 1,01 | down |
| 5953276 | 7184188 | 1336057 | latrophilin 1                                            | Lphn1      | 65096  | 1,17 | down |
| 6017242 | 7184188 | 1336049 | latrophilin 1                                            | Lphn1      | 65096  | 1,06 | down |
| 6018923 | 7184188 | 1336044 | latrophilin 1                                            | Lphn1      | 65096  | 1,66 | up   |
| 6123694 | 7184188 | 1336048 | latrophilin 1                                            | Lphn1      | 65096  | 1,12 | up   |
| 6178010 | 7184188 | 1336043 | latrophilin 1                                            | Lphn1      | 65096  | 1,37 | up   |
| 6444557 | 7184188 | 1336060 | latrophilin 1                                            | Lphn1      | 65096  | 1,22 | up   |
| 6447208 | 7184188 | 1336060 | latrophilin 1                                            | Lphn1      | 65096  | 1,05 | up   |
| 6494120 | 7184188 | 1336063 | latrophilin 1                                            | Lphn1      | 65096  | 1,14 | up   |
| 6564543 | 7184188 | 1336063 | latrophilin 1                                            | Lphn1      | 65096  | 1,30 | up   |
| 6572521 | 7184188 | 1336046 | latrophilin 1                                            | Lphn1      | 65096  | 1,05 | up   |
| 6633152 | 7184188 | 1336055 | latrophilin 1                                            | Lphn1      | 65096  | 1,17 | up   |
| 6655365 | 7184188 | 1336061 | latrophilin 1                                            | Lphn1      | 65096  | 1,15 | down |
| 6684671 | 7184188 | 1336059 | latrophilin 1                                            | Lphn1      | 65096  | 1,12 | down |
| 6729363 | 7184188 | 1336045 | latrophilin 1                                            | Lphn1      | 65096  | 1,10 | up   |
| 6731385 | 7184188 | 1336059 | latrophilin 1                                            | Lphn1      | 65096  | 1,03 | down |
| 5635700 | 7171690 | 1303717 | LEA_4 domain containing protein RGD1359600               | RGD1359600 | 307343 | 1,37 | down |
| 5755700 | 7171690 | 1303716 | LEA_4 domain containing protein RGD1359600               | RGD1359600 | 307343 | 2,05 | up   |

|         |         |         |                                                                         |            |        |      |      |
|---------|---------|---------|-------------------------------------------------------------------------|------------|--------|------|------|
| 5778322 | 7171690 | 1303717 | LEA_4 domain containing protein RGD1359600                              | RGD1359600 | 307343 | 1,18 | down |
| 6117995 | 7171690 | 1303717 | LEA_4 domain containing protein RGD1359600                              | RGD1359600 | 307343 | 1,32 | up   |
| 6156968 | 7171690 | 1303719 | LEA_4 domain containing protein RGD1359600                              | RGD1359600 | 307343 | 1,21 | up   |
| 6172766 | 7171690 | 1303720 | LEA_4 domain containing protein RGD1359600                              | RGD1359600 | 307343 | 1,40 | down |
| 6302767 | 7171690 | 1303717 | LEA_4 domain containing protein RGD1359600                              | RGD1359600 | 307343 | 1,12 | up   |
| 6708864 | 7171690 | 1303718 | LEA_4 domain containing protein RGD1359600                              | RGD1359600 | 307343 | 1,11 | down |
| 5620316 | 7080131 | 1079793 | lectin, galactose binding, soluble 5                                    | Lgals5     | 25475  | 1,15 | down |
| 5966188 | 7080131 | 1079792 | lectin, galactose binding, soluble 5                                    | Lgals5     | 25475  | 2,59 | up   |
| 5981956 | 7080131 | 1079795 | lectin, galactose binding, soluble 5                                    | Lgals5     | 25475  | 1,33 | down |
| 6257488 | 7080131 | 1079794 | lectin, galactose binding, soluble 5                                    | Lgals5     | 25475  | 2,53 | up   |
| 6337592 | 7080131 | 1079796 | lectin, galactose binding, soluble 5                                    | Lgals5     | 25475  | 1,47 | down |
| 5674768 | 7080134 | 1079807 | lectin, galactoside-binding, soluble, 9                                 | Lgals9     | 25476  | 1,88 | up   |
| 5696134 | 7080134 | 1079803 | lectin, galactoside-binding, soluble, 9                                 | Lgals9     | 25476  | 1,25 | up   |
| 5716369 | 7080134 | 1079804 | lectin, galactoside-binding, soluble, 9                                 | Lgals9     | 25476  | 2,32 | up   |
| 5929969 | 7080134 | 1079810 | lectin, galactoside-binding, soluble, 9                                 | Lgals9     | 25476  | 2,14 | down |
| 5970110 | 7080134 | 1079800 | lectin, galactoside-binding, soluble, 9                                 | Lgals9     | 25476  | 1,60 | up   |
| 6032786 | 7080134 | 1079801 | lectin, galactoside-binding, soluble, 9                                 | Lgals9     | 25476  | 1,17 | down |
| 6145439 | 7080134 | 1079805 | lectin, galactoside-binding, soluble, 9                                 | Lgals9     | 25476  | 2,39 | down |
| 6150360 | 7080134 | 1079809 | lectin, galactoside-binding, soluble, 9                                 | Lgals9     | 25476  | 1,30 | down |
| 6194270 | 7080134 | 1079802 | lectin, galactoside-binding, soluble, 9                                 | Lgals9     | 25476  | 1,53 | down |
| 6717738 | 7080134 | 1079808 | lectin, galactoside-binding, soluble, 9                                 | Lgals9     | 25476  | 1,46 | down |
| 6725448 | 7080134 | 1079810 | lectin, galactoside-binding, soluble, 9                                 | Lgals9     | 25476  | 1,36 | down |
| 5673991 | 7100307 | 1128393 | lemur tyrosine kinase 2                                                 | Lmtk2      | 304286 | 1,07 | up   |
| 5697150 | 7100307 | 1128388 | lemur tyrosine kinase 2                                                 | Lmtk2      | 304286 | 1,18 | up   |
| 5857702 | 7100307 | 1128398 | lemur tyrosine kinase 2                                                 | Lmtk2      | 304286 | 1,27 | up   |
| 5898299 | 7100307 | 1128403 | lemur tyrosine kinase 2                                                 | Lmtk2      | 304286 | 1,12 | up   |
| 6066627 | 7100307 | 1128391 | lemur tyrosine kinase 2                                                 | Lmtk2      | 304286 | 1,10 | down |
| 6164261 | 7100307 | 1128387 | lemur tyrosine kinase 2                                                 | Lmtk2      | 304286 | 1,20 | up   |
| 6211437 | 7100307 | 1128408 | lemur tyrosine kinase 2                                                 | Lmtk2      | 304286 | 1,12 | up   |
| 6211774 | 7100307 | 1128395 | lemur tyrosine kinase 2                                                 | Lmtk2      | 304286 | 1,00 | down |
| 6265169 | 7100307 | 1128399 | lemur tyrosine kinase 2                                                 | Lmtk2      | 304286 | 1,00 | up   |
| 6285056 | 7100307 | 1128402 | lemur tyrosine kinase 2                                                 | Lmtk2      | 304286 | 1,18 | up   |
| 6301051 | 7100307 | 1128400 | lemur tyrosine kinase 2                                                 | Lmtk2      | 304286 | 1,09 | up   |
| 6414644 | 7100307 | 1128390 | lemur tyrosine kinase 2                                                 | Lmtk2      | 304286 | 1,14 | up   |
| 6608260 | 7100307 | 1128408 | lemur tyrosine kinase 2                                                 | Lmtk2      | 304286 | 1,34 | up   |
| 6699152 | 7100307 | 1128401 | lemur tyrosine kinase 2                                                 | Lmtk2      | 304286 | 1,05 | down |
| 5633959 | 7338076 | 1715146 | Leo1, Paf1/RNA polymerase II complex component, homolog (S. cerevisiae) | Leo1       | 300837 | 1,00 | up   |
| 5634792 | 7338076 | 1715143 | Leo1, Paf1/RNA polymerase II complex component, homolog (S. cerevisiae) | Leo1       | 300837 | 1,21 | down |
| 5685293 | 7338076 | 1715148 | Leo1, Paf1/RNA polymerase II complex component, homolog (S. cerevisiae) | Leo1       | 300837 | 1,22 | down |
| 5893781 | 7338076 | 1715144 | Leo1, Paf1/RNA polymerase II complex component, homolog (S. cerevisiae) | Leo1       | 300837 | 1,07 | up   |
| 5992485 | 7338076 | 1715150 | Leo1, Paf1/RNA polymerase II complex component, homolog (S. cerevisiae) | Leo1       | 300837 | 1,01 | up   |
| 6102218 | 7338076 | 1715141 | Leo1, Paf1/RNA polymerase II complex component, homolog (S. cerevisiae) | Leo1       | 300837 | 2,23 | down |
| 6113121 | 7338076 | 1715145 | Leo1, Paf1/RNA polymerase II complex component, homolog (S. cerevisiae) | Leo1       | 300837 | 1,35 | up   |
| 6229140 | 7338076 | 1715141 | Leo1, Paf1/RNA polymerase II complex component, homolog (S. cerevisiae) | Leo1       | 300837 | 1,22 | up   |
| 6295715 | 7338076 | 1715140 | Leo1, Paf1/RNA polymerase II complex component, homolog (S. cerevisiae) | Leo1       | 300837 | 1,03 | down |
| 6336513 | 7338076 | 1715141 | Leo1, Paf1/RNA polymerase II complex component, homolog (S. cerevisiae) | Leo1       | 300837 | 1,03 | up   |
| 6364519 | 7338076 | 1715141 | Leo1, Paf1/RNA polymerase II complex component, homolog (S. cerevisiae) | Leo1       | 300837 | 1,10 | down |
| 6369690 | 7338076 | 1715149 | Leo1, Paf1/RNA polymerase II complex component, homolog (S. cerevisiae) | Leo1       | 300837 | 1,16 | up   |
| 6406050 | 7338076 | 1715151 | Leo1, Paf1/RNA polymerase II complex component, homolog (S. cerevisiae) | Leo1       | 300837 | 1,20 | up   |
| 6409383 | 7338076 | 1715147 | Leo1, Paf1/RNA polymerase II complex component, homolog (S. cerevisiae) | Leo1       | 300837 | 1,03 | up   |
| 6480594 | 7338076 | 1715142 | Leo1, Paf1/RNA polymerase II complex component, homolog (S. cerevisiae) | Leo1       | 300837 | 1,46 | down |
| 5661508 | 7089238 | 1101647 | leprecan-like 1                                                         | Leprel1    | 288016 | 1,44 | down |
| 5668942 | 7089238 | 1101657 | leprecan-like 1                                                         | Leprel1    | 288016 | 1,27 | down |
| 5757906 | 7089238 | 1101651 | leprecan-like 1                                                         | Leprel1    | 288016 | 1,08 | up   |
| 5879273 | 7089238 | 1101656 | leprecan-like 1                                                         | Leprel1    | 288016 | 1,21 | down |
| 5923887 | 7089238 | 1101665 | leprecan-like 1                                                         | Leprel1    | 288016 | 1,70 | up   |

|         |         |         |                                                            |                 |                 |      |      |
|---------|---------|---------|------------------------------------------------------------|-----------------|-----------------|------|------|
| 5966850 | 7089238 | 1101655 | leprecan-like 1                                            | Leprel1         | 288016          | 1,00 | down |
| 6032630 | 7089238 | 1101661 | leprecan-like 1                                            | Leprel1         | 288016          | 1,22 | up   |
| 6097652 | 7089238 | 1101617 | leprecan-like 1                                            | Leprel1         | 288016          | 1,01 | up   |
| 6154351 | 7089238 | 1101654 | leprecan-like 1                                            | Leprel1         | 288016          | 1,51 | up   |
| 6193603 | 7089238 | 1101653 | leprecan-like 1                                            | Leprel1         | 288016          | 1,10 | down |
| 6205711 | 7089238 | 1101660 | leprecan-like 1                                            | Leprel1         | 288016          | 1,07 | up   |
| 6262878 | 7089238 | 1101646 | leprecan-like 1                                            | Leprel1         | 288016          | 1,09 | down |
| 6291429 | 7089238 | 1101658 | leprecan-like 1                                            | Leprel1         | 288016          | 1,08 | down |
| 6294442 | 7089238 | 1101659 | leprecan-like 1                                            | Leprel1         | 288016          | 2,33 | down |
| 6334109 | 7089238 | 1101616 | leprecan-like 1                                            | Leprel1         | 288016          | 1,10 | up   |
| 6397752 | 7089238 | 1101616 | leprecan-like 1                                            | Leprel1         | 288016          | 1,03 | up   |
| 6484432 | 7089238 | 1101652 | leprecan-like 1                                            | Leprel1         | 288016          | 1,01 | up   |
| 6563842 | 7089238 | 1101616 | leprecan-like 1                                            | Leprel1         | 288016          | 1,03 | up   |
| 5618521 | 7277745 | 1567227 | leptin receptor                                            | Lepr            | 24536           | 1,41 | up   |
| 5684413 | 7277745 | 1567221 | leptin receptor                                            | Lepr            | 24536           | 1,48 | up   |
| 5758362 | 7277745 | 1567234 | leptin receptor                                            | Lepr            | 24536           | 1,09 | down |
| 5826939 | 7277745 | 1567230 | leptin receptor                                            | Lepr            | 24536           | 1,04 | up   |
| 5858497 | 7277745 | 1567228 | leptin receptor                                            | Lepr            | 24536           | 1,24 | down |
| 5890414 | 7277745 | 1567231 | leptin receptor                                            | Lepr            | 24536           | 1,02 | down |
| 5900566 | 7277745 | 1567219 | leptin receptor                                            | Lepr            | 24536           | 1,35 | up   |
| 5936574 | 7277745 | 1567233 | leptin receptor                                            | Lepr            | 24536           | 1,15 | down |
| 5943315 | 7277745 | 1567222 | leptin receptor                                            | Lepr            | 24536           | 1,07 | down |
| 6083002 | 7277745 | 1567225 | leptin receptor                                            | Lepr            | 24536           | 1,27 | down |
| 6115388 | 7277745 | 1567220 | leptin receptor                                            | Lepr            | 24536           | 1,37 | up   |
| 6143612 | 7277745 | 1567226 | leptin receptor                                            | Lepr            | 24536           | 1,45 | down |
| 6211967 | 7277745 | 1567232 | leptin receptor                                            | Lepr            | 24536           | 1,69 | up   |
| 6259502 | 7277745 | 1567220 | leptin receptor                                            | Lepr            | 24536           | 1,22 | down |
| 6360297 | 7277745 | 1567233 | leptin receptor                                            | Lepr            | 24536           | 1,49 | down |
| 6510961 | 7277745 | 1567229 | leptin receptor                                            | Lepr            | 24536           | 1,35 | down |
| 6525817 | 7277745 | 1567225 | leptin receptor                                            | Lepr            | 24536           | 1,05 | up   |
| 6691340 | 7277745 | 1567223 | leptin receptor                                            | Lepr            | 24536           | 1,28 | up   |
| 6716692 | 7277745 | 1567224 | leptin receptor                                            | Lepr            | 24536           | 1,01 | down |
| 6051622 | 7277745 | 1567216 | leptin receptor overlapping transcript                     | Leprot          | 56766           | 1,28 | up   |
| 6074695 | 7277745 | 1567218 | leptin receptor overlapping transcript                     | Leprot          | 56766           | 1,01 | down |
| 6075890 | 7277745 | 1567217 | leptin receptor overlapping transcript                     | Leprot          | 56766           | 1,06 | down |
| 6183583 | 7277745 | 1567218 | leptin receptor overlapping transcript                     | Leprot          | 56766           | 1,30 | up   |
| 6213432 | 7277745 | 1567218 | leptin receptor overlapping transcript                     | Leprot          | 56766           | 1,27 | down |
| 6531276 | 7277745 | 1567218 | leptin receptor overlapping transcript                     | Leprot          | 56766           | 1,31 | down |
| 6597387 | 7277745 | 1567218 | leptin receptor overlapping transcript                     | Leprot          | 56766           | 2,02 | up   |
| 6632327 | 7277745 | 1567215 | leptin receptor overlapping transcript                     | Leprot          | 56766           | 1,12 | up   |
| 6695876 | 7277745 | 1567218 | leptin receptor overlapping transcript                     | Leprot          | 56766           | 1,28 | up   |
| 6044372 | 7277745 | 1567214 | leptin receptor overlapping transcript /// leptin receptor | Leprot /// Lepr | 56766 /// 24536 | 1,23 | up   |
| 5758273 | 7279032 | 1570548 | leucine proline-enriched proteoglycan (leprecan) 1         | Lepre1          | 114200          | 1,07 | up   |
| 5968507 | 7279032 | 1570561 | leucine proline-enriched proteoglycan (leprecan) 1         | Lepre1          | 114200          | 1,13 | down |
| 5977853 | 7279032 | 1570557 | leucine proline-enriched proteoglycan (leprecan) 1         | Lepre1          | 114200          | 1,01 | down |
| 6061996 | 7279032 | 1570554 | leucine proline-enriched proteoglycan (leprecan) 1         | Lepre1          | 114200          | 1,07 | down |
| 6062423 | 7279032 | 1570560 | leucine proline-enriched proteoglycan (leprecan) 1         | Lepre1          | 114200          | 1,32 | up   |
| 6076143 | 7279032 | 1570546 | leucine proline-enriched proteoglycan (leprecan) 1         | Lepre1          | 114200          | 1,32 | up   |
| 6114919 | 7279032 | 1570550 | leucine proline-enriched proteoglycan (leprecan) 1         | Lepre1          | 114200          | 1,05 | up   |
| 6321779 | 7279032 | 1570558 | leucine proline-enriched proteoglycan (leprecan) 1         | Lepre1          | 114200          | 1,33 | down |
| 6353970 | 7279032 | 1570559 | leucine proline-enriched proteoglycan (leprecan) 1         | Lepre1          | 114200          | 1,08 | up   |
| 6425490 | 7279032 | 1570560 | leucine proline-enriched proteoglycan (leprecan) 1         | Lepre1          | 114200          | 1,14 | up   |
| 6454581 | 7279032 | 1570552 | leucine proline-enriched proteoglycan (leprecan) 1         | Lepre1          | 114200          | 3,68 | down |
| 6501138 | 7279032 | 1570555 | leucine proline-enriched proteoglycan (leprecan) 1         | Lepre1          | 114200          | 1,11 | up   |
| 6511812 | 7279032 | 1570551 | leucine proline-enriched proteoglycan (leprecan) 1         | Lepre1          | 114200          | 1,02 | up   |
| 6533532 | 7279032 | 1570556 | leucine proline-enriched proteoglycan (leprecan) 1         | Lepre1          | 114200          | 1,03 | down |

|         |         |         |                                                         |         |        |      |      |
|---------|---------|---------|---------------------------------------------------------|---------|--------|------|------|
| 6583619 | 7279032 | 1570553 | leucine proline-enriched proteoglycan (leprecan) 1      | Lepre1  | 114200 | 1,02 | up   |
| 6657176 | 7279032 | 1570549 | leucine proline-enriched proteoglycan (leprecan) 1      | Lepre1  | 114200 | 1,49 | up   |
| 6669739 | 7279032 | 1570547 | leucine proline-enriched proteoglycan (leprecan) 1      | Lepre1  | 114200 | 1,12 | up   |
| 5626075 | 7357599 | 1763614 | leucine rich repeat (in FLII) interacting protein 1     | Lrrfip1 | 367314 | 1,01 | up   |
| 5643528 | 7357599 | 1763610 | leucine rich repeat (in FLII) interacting protein 1     | Lrrfip1 | 367314 | 1,02 | down |
| 5670415 | 7357599 | 1763609 | leucine rich repeat (in FLII) interacting protein 1     | Lrrfip1 | 367314 | 1,07 | down |
| 5760509 | 7357599 | 1763614 | leucine rich repeat (in FLII) interacting protein 1     | Lrrfip1 | 367314 | 1,96 | down |
| 5792635 | 7357599 | 1763607 | leucine rich repeat (in FLII) interacting protein 1     | Lrrfip1 | 367314 | 1,74 | up   |
| 5865594 | 7357599 | 1763608 | leucine rich repeat (in FLII) interacting protein 1     | Lrrfip1 | 367314 | 1,46 | down |
| 5919777 | 7357599 | 1763614 | leucine rich repeat (in FLII) interacting protein 1     | Lrrfip1 | 367314 | 1,39 | down |
| 5956712 | 7357599 | 1763614 | leucine rich repeat (in FLII) interacting protein 1     | Lrrfip1 | 367314 | 2,72 | down |
| 5982181 | 7357599 | 1763612 | leucine rich repeat (in FLII) interacting protein 1     | Lrrfip1 | 367314 | 2,04 | down |
| 5994890 | 7357599 | 1763615 | leucine rich repeat (in FLII) interacting protein 1     | Lrrfip1 | 367314 | 1,27 | up   |
| 6124157 | 7357599 | 1763616 | leucine rich repeat (in FLII) interacting protein 1     | Lrrfip1 | 367314 | 1,43 | up   |
| 6311886 | 7357599 | 1763615 | leucine rich repeat (in FLII) interacting protein 1     | Lrrfip1 | 367314 | 1,16 | down |
| 6457884 | 7357599 | 1763611 | leucine rich repeat (in FLII) interacting protein 1     | Lrrfip1 | 367314 | 1,03 | up   |
| 6601203 | 7357599 | 1763614 | leucine rich repeat (in FLII) interacting protein 1     | Lrrfip1 | 367314 | 1,10 | down |
| 6606626 | 7357599 | 1763614 | leucine rich repeat (in FLII) interacting protein 1     | Lrrfip1 | 367314 | 1,62 | up   |
| 6719551 | 7357599 | 1763613 | leucine rich repeat (in FLII) interacting protein 1     | Lrrfip1 | 367314 | 1,62 | up   |
| 5948617 | 7206133 | 1389975 | leucine rich repeat and coiled-coil domain containing 1 | Lrrcc1  | 266808 | 1,05 | up   |
| 6294690 | 7206133 | 1389973 | leucine rich repeat and coiled-coil domain containing 1 | Lrrcc1  | 266808 | 1,17 | down |
| 6350005 | 7206133 | 1389972 | leucine rich repeat and coiled-coil domain containing 1 | Lrrcc1  | 266808 | 1,41 | up   |
| 6370968 | 7206133 | 1389963 | leucine rich repeat and coiled-coil domain containing 1 | Lrrcc1  | 266808 | 1,86 | down |
| 6377709 | 7206133 | 1389976 | leucine rich repeat and coiled-coil domain containing 1 | Lrrcc1  | 266808 | 1,16 | down |
| 6702895 | 7206133 | 1389974 | leucine rich repeat and coiled-coil domain containing 1 | Lrrcc1  | 266808 | 1,24 | up   |
| 5815996 | 7201217 | 1378775 | leucine rich repeat containing 40                       | Lrrc40  | 310946 | 1,10 | up   |
| 5991948 | 7201217 | 1378774 | leucine rich repeat containing 40                       | Lrrc40  | 310946 | 1,71 | down |
| 6005695 | 7201217 | 1378768 | leucine rich repeat containing 40                       | Lrrc40  | 310946 | 1,01 | up   |
| 6045114 | 7201217 | 1378769 | leucine rich repeat containing 40                       | Lrrc40  | 310946 | 1,45 | up   |
| 6111495 | 7201217 | 1378771 | leucine rich repeat containing 40                       | Lrrc40  | 310946 | 1,11 | up   |
| 6279693 | 7201217 | 1378770 | leucine rich repeat containing 40                       | Lrrc40  | 310946 | 1,28 | down |
| 6458552 | 7201217 | 1378776 | leucine rich repeat containing 40                       | Lrrc40  | 310946 | 1,64 | up   |
| 6520097 | 7201217 | 1378767 | leucine rich repeat containing 40                       | Lrrc40  | 310946 | 1,05 | down |
| 6665055 | 7201217 | 1378772 | leucine rich repeat containing 40                       | Lrrc40  | 310946 | 1,57 | down |
| 6667971 | 7201217 | 1378766 | leucine rich repeat containing 40                       | Lrrc40  | 310946 | 1,05 | up   |
| 6722155 | 7201217 | 1378773 | leucine rich repeat containing 40                       | Lrrc40  | 310946 | 1,36 | down |
| 5785236 | 7241163 | 1476819 | leucine rich repeat containing 55                       | Lrrc55  | 311171 | 1,16 | up   |
| 5805767 | 7241163 | 1476822 | leucine rich repeat containing 55                       | Lrrc55  | 311171 | 1,64 | down |
| 5903329 | 7241163 | 1476820 | leucine rich repeat containing 55                       | Lrrc55  | 311171 | 1,15 | up   |
| 6064538 | 7241163 | 1476819 | leucine rich repeat containing 55                       | Lrrc55  | 311171 | 1,63 | up   |
| 6076344 | 7241163 | 1476822 | leucine rich repeat containing 55                       | Lrrc55  | 311171 | 1,63 | up   |
| 6094946 | 7241163 | 1476819 | leucine rich repeat containing 55                       | Lrrc55  | 311171 | 1,37 | down |
| 6309630 | 7241163 | 1476819 | leucine rich repeat containing 55                       | Lrrc55  | 311171 | 1,24 | down |
| 6317124 | 7241163 | 1476823 | leucine rich repeat containing 55                       | Lrrc55  | 311171 | 1,40 | up   |
| 5918747 | 7255120 | 1510366 | leucine rich repeat transmembrane neuronal 1            | LRRTM1  | 679668 | 1,21 | up   |
| 6336039 | 7255120 | 1510366 | leucine rich repeat transmembrane neuronal 1            | LRRTM1  | 679668 | 2,15 | down |
| 6436029 | 7255120 | 1510369 | leucine rich repeat transmembrane neuronal 1            | LRRTM1  | 679668 | 2,64 | down |
| 6463627 | 7255120 | 1510367 | leucine rich repeat transmembrane neuronal 1            | LRRTM1  | 679668 | 1,39 | down |
| 6478510 | 7255120 | 1510374 | leucine rich repeat transmembrane neuronal 1            | LRRTM1  | 679668 | 1,17 | up   |
| 6491227 | 7255120 | 1510366 | leucine rich repeat transmembrane neuronal 1            | LRRTM1  | 679668 | 1,12 | down |
| 6675985 | 7255120 | 1510368 | leucine rich repeat transmembrane neuronal 1            | LRRTM1  | 679668 | 1,18 | down |
| 5739317 | 7052385 | 1014770 | leucine-rich repeat kinase 1                            | Lrrk1   | 308703 | 1,15 | up   |
| 5781081 | 7052385 | 1014769 | leucine-rich repeat kinase 1                            | Lrrk1   | 308703 | 1,40 | up   |
| 5830327 | 7052385 | 1014770 | leucine-rich repeat kinase 1                            | Lrrk1   | 308703 | 1,65 | down |
| 5986973 | 7052385 | 1014770 | leucine-rich repeat kinase 1                            | Lrrk1   | 308703 | 1,04 | up   |
| 6428450 | 7052385 | 1014769 | leucine-rich repeat kinase 1                            | Lrrk1   | 308703 | 1,16 | down |

|         |         |         |                                                                     |       |        |      |      |
|---------|---------|---------|---------------------------------------------------------------------|-------|--------|------|------|
| 6610509 | 7052385 | 1014816 | leucine-rich repeat kinase 1                                        | Lrrk1 | 308703 | 1,76 | down |
| 6700621 | 7052385 | 1014816 | leucine-rich repeat kinase 1                                        | Lrrk1 | 308703 | 1,15 | down |
| 5666306 | 7319937 | 1672319 | leucine-rich repeat kinase 2                                        | Lrrk2 | 300160 | 1,10 | up   |
| 5829965 | 7319937 | 1672319 | leucine-rich repeat kinase 2                                        | Lrrk2 | 300160 | 1,10 | up   |
| 5900824 | 7319937 | 1672315 | leucine-rich repeat kinase 2                                        | Lrrk2 | 300160 | 1,23 | down |
| 5984418 | 7319937 | 1672315 | leucine-rich repeat kinase 2                                        | Lrrk2 | 300160 | 1,02 | up   |
| 6067320 | 7319937 | 1672318 | leucine-rich repeat kinase 2                                        | Lrrk2 | 300160 | 1,59 | down |
| 6089618 | 7319937 | 1672312 | leucine-rich repeat kinase 2                                        | Lrrk2 | 300160 | 1,07 | down |
| 6092408 | 7319937 | 1672314 | leucine-rich repeat kinase 2                                        | Lrrk2 | 300160 | 1,00 | down |
| 6452700 | 7319937 | 1672316 | leucine-rich repeat kinase 2                                        | Lrrk2 | 300160 | 1,01 | down |
| 6453845 | 7319937 | 1672311 | leucine-rich repeat kinase 2                                        | Lrrk2 | 300160 | 1,32 | up   |
| 6702414 | 7319937 | 1672313 | leucine-rich repeat kinase 2                                        | Lrrk2 | 300160 | 1,16 | up   |
| 5694014 | 7140113 | 1226064 | leucine-rich repeats and calponin homology (CH) domain containing 1 | Lrch1 | 502020 | 1,05 | up   |
| 5801651 | 7140113 | 1226060 | leucine-rich repeats and calponin homology (CH) domain containing 1 | Lrch1 | 502020 | 1,06 | down |
| 6000783 | 7140113 | 1226046 | leucine-rich repeats and calponin homology (CH) domain containing 1 | Lrch1 | 502020 | 1,64 | down |
| 6025874 | 7140113 | 1226056 | leucine-rich repeats and calponin homology (CH) domain containing 1 | Lrch1 | 502020 | 1,09 | up   |
| 6062388 | 7140113 | 1226067 | leucine-rich repeats and calponin homology (CH) domain containing 1 | Lrch1 | 502020 | 1,41 | up   |
| 6135163 | 7140113 | 1226077 | leucine-rich repeats and calponin homology (CH) domain containing 1 | Lrch1 | 502020 | 1,51 | up   |
| 6139434 | 7140113 | 1226051 | leucine-rich repeats and calponin homology (CH) domain containing 1 | Lrch1 | 502020 | 1,00 | down |
| 6140819 | 7140113 | 1226046 | leucine-rich repeats and calponin homology (CH) domain containing 1 | Lrch1 | 502020 | 1,51 | up   |
| 6188854 | 7140113 | 1226069 | leucine-rich repeats and calponin homology (CH) domain containing 1 | Lrch1 | 502020 | 1,41 | up   |
| 6192717 | 7140113 | 1226062 | leucine-rich repeats and calponin homology (CH) domain containing 1 | Lrch1 | 502020 | 1,45 | down |
| 6233365 | 7140113 | 1226073 | leucine-rich repeats and calponin homology (CH) domain containing 1 | Lrch1 | 502020 | 1,40 | up   |
| 6234125 | 7140113 | 1226078 | leucine-rich repeats and calponin homology (CH) domain containing 1 | Lrch1 | 502020 | 1,31 | up   |
| 6275849 | 7140113 | 1226072 | leucine-rich repeats and calponin homology (CH) domain containing 1 | Lrch1 | 502020 | 2,18 | up   |
| 6291083 | 7140113 | 1226071 | leucine-rich repeats and calponin homology (CH) domain containing 1 | Lrch1 | 502020 | 1,13 | down |
| 6394000 | 7140113 | 1226089 | leucine-rich repeats and calponin homology (CH) domain containing 1 | Lrch1 | 502020 | 1,03 | down |
| 6463975 | 7140113 | 1226058 | leucine-rich repeats and calponin homology (CH) domain containing 1 | Lrch1 | 502020 | 1,12 | down |
| 6574775 | 7140113 | 1226052 | leucine-rich repeats and calponin homology (CH) domain containing 1 | Lrch1 | 502020 | 1,61 | down |
| 6612775 | 7140113 | 1226049 | leucine-rich repeats and calponin homology (CH) domain containing 1 | Lrch1 | 502020 | 1,13 | up   |
| 6635526 | 7140113 | 1226074 | leucine-rich repeats and calponin homology (CH) domain containing 1 | Lrch1 | 502020 | 1,58 | up   |
| 6653709 | 7140113 | 1226061 | leucine-rich repeats and calponin homology (CH) domain containing 1 | Lrch1 | 502020 | 1,51 | down |
| 5671457 | 7373906 | 1806363 | leucine-rich repeats and calponin homology (CH) domain containing 2 | Lrch2 | 680591 | 1,10 | up   |
| 5674407 | 7168876 | 1296930 | LIM and senescent cell antigen like domains 2                       | Lims2 | 361303 | 1,09 | up   |
| 5679708 | 7168876 | 1296929 | LIM and senescent cell antigen like domains 2                       | Lims2 | 361303 | 1,28 | up   |
| 5713278 | 7168876 | 1296927 | LIM and senescent cell antigen like domains 2                       | Lims2 | 361303 | 2,19 | up   |
| 5847785 | 7168876 | 1296923 | LIM and senescent cell antigen like domains 2                       | Lims2 | 361303 | 1,03 | down |
| 5909114 | 7168876 | 1296930 | LIM and senescent cell antigen like domains 2                       | Lims2 | 361303 | 1,05 | down |
| 5930248 | 7168876 | 1296928 | LIM and senescent cell antigen like domains 2                       | Lims2 | 361303 | 1,82 | down |
| 6045857 | 7168876 | 1296924 | LIM and senescent cell antigen like domains 2                       | Lims2 | 361303 | 1,22 | up   |
| 6223696 | 7168876 | 1296926 | LIM and senescent cell antigen like domains 2                       | Lims2 | 361303 | 1,10 | down |
| 6249489 | 7168876 | 1296930 | LIM and senescent cell antigen like domains 2                       | Lims2 | 361303 | 1,54 | down |
| 6296837 | 7168876 | 1296930 | LIM and senescent cell antigen like domains 2                       | Lims2 | 361303 | 1,30 | down |
| 6436846 | 7168876 | 1296931 | LIM and senescent cell antigen like domains 2                       | Lims2 | 361303 | 1,15 | down |
| 6436883 | 7168876 | 1296931 | LIM and senescent cell antigen like domains 2                       | Lims2 | 361303 | 1,26 | up   |
| 6485534 | 7168876 | 1296922 | LIM and senescent cell antigen like domains 2                       | Lims2 | 361303 | 1,12 | up   |
| 6649842 | 7168876 | 1296925 | LIM and senescent cell antigen like domains 2                       | Lims2 | 361303 | 1,07 | down |
| 6710069 | 7168876 | 1296929 | LIM and senescent cell antigen like domains 2                       | Lims2 | 361303 | 1,08 | down |
| 5694591 | 7134690 | 1212765 | LIM domain 7                                                        | Lmo7  | 361084 | 1,14 | up   |
| 5706429 | 7134690 | 1212777 | LIM domain 7                                                        | Lmo7  | 361084 | 1,11 | down |
| 5756661 | 7134690 | 1212763 | LIM domain 7                                                        | Lmo7  | 361084 | 1,07 | up   |
| 5859837 | 7134690 | 1212760 | LIM domain 7                                                        | Lmo7  | 361084 | 1,21 | up   |
| 5882742 | 7134690 | 1212766 | LIM domain 7                                                        | Lmo7  | 361084 | 2,18 | down |
| 5926297 | 7134690 | 1212761 | LIM domain 7                                                        | Lmo7  | 361084 | 1,00 | up   |
| 5937924 | 7134690 | 1212762 | LIM domain 7                                                        | Lmo7  | 361084 | 1,06 | down |
| 6002692 | 7134690 | 1212765 | LIM domain 7                                                        | Lmo7  | 361084 | 1,13 | down |

|         |         |         |                                                                 |      |        |      |      |
|---------|---------|---------|-----------------------------------------------------------------|------|--------|------|------|
| 6077922 | 7134690 | 1212775 | LIM domain 7                                                    | Lmo7 | 361084 | 1,01 | down |
| 6097733 | 7134690 | 1212747 | LIM domain 7                                                    | Lmo7 | 361084 | 1,46 | up   |
| 6113974 | 7134690 | 1212749 | LIM domain 7                                                    | Lmo7 | 361084 | 1,21 | down |
| 6114001 | 7134690 | 1212750 | LIM domain 7                                                    | Lmo7 | 361084 | 1,14 | up   |
| 6166389 | 7134690 | 1212750 | LIM domain 7                                                    | Lmo7 | 361084 | 1,26 | up   |
| 6171837 | 7134690 | 1212752 | LIM domain 7                                                    | Lmo7 | 361084 | 1,44 | down |
| 6250677 | 7134690 | 1212760 | LIM domain 7                                                    | Lmo7 | 361084 | 1,13 | up   |
| 6279095 | 7134690 | 1212770 | LIM domain 7                                                    | Lmo7 | 361084 | 1,28 | down |
| 6290879 | 7134690 | 1212748 | LIM domain 7                                                    | Lmo7 | 361084 | 1,23 | up   |
| 6310872 | 7134690 | 1212776 | LIM domain 7                                                    | Lmo7 | 361084 | 1,05 | down |
| 6345786 | 7134690 | 1212754 | LIM domain 7                                                    | Lmo7 | 361084 | 1,09 | down |
| 6407634 | 7134690 | 1212767 | LIM domain 7                                                    | Lmo7 | 361084 | 1,09 | up   |
| 6430471 | 7134690 | 1212765 | LIM domain 7                                                    | Lmo7 | 361084 | 1,05 | up   |
| 6445003 | 7134690 | 1212757 | LIM domain 7                                                    | Lmo7 | 361084 | 1,30 | up   |
| 6477198 | 7134690 | 1212771 | LIM domain 7                                                    | Lmo7 | 361084 | 1,63 | up   |
| 6488384 | 7134690 | 1212751 | LIM domain 7                                                    | Lmo7 | 361084 | 1,11 | up   |
| 6496589 | 7134690 | 1212772 | LIM domain 7                                                    | Lmo7 | 361084 | 1,12 | up   |
| 6503128 | 7134690 | 1212758 | LIM domain 7                                                    | Lmo7 | 361084 | 1,05 | up   |
| 6515601 | 7134690 | 1212759 | LIM domain 7                                                    | Lmo7 | 361084 | 1,13 | down |
| 6518228 | 7134690 | 1212753 | LIM domain 7                                                    | Lmo7 | 361084 | 1,23 | down |
| 6556390 | 7134690 | 1212774 | LIM domain 7                                                    | Lmo7 | 361084 | 1,26 | down |
| 6559183 | 7134690 | 1212771 | LIM domain 7                                                    | Lmo7 | 361084 | 1,13 | up   |
| 6559486 | 7134690 | 1212754 | LIM domain 7                                                    | Lmo7 | 361084 | 1,07 | up   |
| 6578402 | 7134690 | 1212756 | LIM domain 7                                                    | Lmo7 | 361084 | 1,28 | down |
| 6611015 | 7134690 | 1212773 | LIM domain 7                                                    | Lmo7 | 361084 | 1,12 | down |
| 6620091 | 7134690 | 1212764 | LIM domain 7                                                    | Lmo7 | 361084 | 1,58 | down |
| 6658183 | 7134690 | 1212769 | LIM domain 7                                                    | Lmo7 | 361084 | 1,17 | down |
| 6662292 | 7134690 | 1212765 | LIM domain 7                                                    | Lmo7 | 361084 | 1,19 | up   |
| 6666182 | 7134690 | 1212761 | LIM domain 7                                                    | Lmo7 | 361084 | 1,02 | up   |
| 6666634 | 7134690 | 1212768 | LIM domain 7                                                    | Lmo7 | 361084 | 1,08 | up   |
| 6671012 | 7134690 | 1212755 | LIM domain 7                                                    | Lmo7 | 361084 | 1,01 | down |
| 6674144 | 7134690 | 1212760 | LIM domain 7                                                    | Lmo7 | 361084 | 1,26 | down |
| 6711016 | 7134690 | 1212755 | LIM domain 7                                                    | Lmo7 | 361084 | 1,01 | up   |
| 6729801 | 7134690 | 1212755 | LIM domain 7                                                    | Lmo7 | 361084 | 1,00 | down |
| 5780335 | 7119556 | 1176078 | LIM domain binding 2                                            | Ldb2 | 289664 | 1,12 | down |
| 5817278 | 7119556 | 1176071 | LIM domain binding 2                                            | Ldb2 | 289664 | 1,30 | up   |
| 5827061 | 7119556 | 1176078 | LIM domain binding 2                                            | Ldb2 | 289664 | 1,49 | down |
| 6135758 | 7119556 | 1176024 | LIM domain binding 2                                            | Ldb2 | 289664 | 1,05 | down |
| 6171045 | 7119556 | 1176059 | LIM domain binding 2                                            | Ldb2 | 289664 | 1,22 | up   |
| 6224395 | 7119556 | 1176078 | LIM domain binding 2                                            | Ldb2 | 289664 | 1,03 | down |
| 6399866 | 7119556 | 1176058 | LIM domain binding 2                                            | Ldb2 | 289664 | 1,09 | up   |
| 6480851 | 7119556 | 1176073 | LIM domain binding 2                                            | Ldb2 | 289664 | 2,03 | down |
| 6556793 | 7119556 | 1176046 | LIM domain binding 2                                            | Ldb2 | 289664 | 1,02 | up   |
| 6614971 | 7119556 | 1176024 | LIM domain binding 2                                            | Ldb2 | 289664 | 1,06 | down |
| 6679030 | 7119556 | 1176056 | LIM domain binding 2                                            | Ldb2 | 289664 | 1,30 | down |
| 5635142 | 7094687 | 1114325 | LIM domain containing preferred translocation partner in lipoma | Lpp  | 288010 | 1,00 | down |
| 5837325 | 7094687 | 1114324 | LIM domain containing preferred translocation partner in lipoma | Lpp  | 288010 | 1,33 | up   |
| 5855915 | 7094687 | 1114322 | LIM domain containing preferred translocation partner in lipoma | Lpp  | 288010 | 1,45 | down |
| 5895758 | 7094687 | 1114323 | LIM domain containing preferred translocation partner in lipoma | Lpp  | 288010 | 1,03 | down |
| 5948026 | 7094687 | 1114318 | LIM domain containing preferred translocation partner in lipoma | Lpp  | 288010 | 1,31 | up   |
| 6104386 | 7094687 | 1114321 | LIM domain containing preferred translocation partner in lipoma | Lpp  | 288010 | 1,08 | down |
| 6112881 | 7094687 | 1114320 | LIM domain containing preferred translocation partner in lipoma | Lpp  | 288010 | 1,34 | up   |
| 6167860 | 7094687 | 1114319 | LIM domain containing preferred translocation partner in lipoma | Lpp  | 288010 | 1,49 | up   |
| 6307426 | 7094687 | 1114327 | LIM domain containing preferred translocation partner in lipoma | Lpp  | 288010 | 2,35 | down |
| 6372464 | 7094687 | 1114323 | LIM domain containing preferred translocation partner in lipoma | Lpp  | 288010 | 1,25 | up   |
| 6420027 | 7094687 | 1114325 | LIM domain containing preferred translocation partner in lipoma | Lpp  | 288010 | 1,01 | down |

|         |         |         |                                                                 |       |        |      |      |
|---------|---------|---------|-----------------------------------------------------------------|-------|--------|------|------|
| 6504962 | 7094687 | 1114317 | LIM domain containing preferred translocation partner in lipoma | Lpp   | 288010 | 1,33 | down |
| 6650810 | 7094687 | 1114326 | LIM domain containing preferred translocation partner in lipoma | Lpp   | 288010 | 1,13 | down |
| 6735594 | 7094687 | 1114323 | LIM domain containing preferred translocation partner in lipoma | Lpp   | 288010 | 1,29 | up   |
| 5709706 | 7230698 | 1449070 | LIM domain only 2                                               | Lmo2  | 362176 | 2,39 | up   |
| 6032821 | 7230698 | 1449067 | LIM domain only 2                                               | Lmo2  | 362176 | 3,30 | down |
| 6377013 | 7230698 | 1449073 | LIM domain only 2                                               | Lmo2  | 362176 | 2,59 | up   |
| 6446894 | 7230698 | 1449067 | LIM domain only 2                                               | Lmo2  | 362176 | 1,40 | down |
| 6501126 | 7230698 | 1449073 | LIM domain only 2                                               | Lmo2  | 362176 | 2,69 | up   |
| 6689357 | 7230698 | 1449067 | LIM domain only 2                                               | Lmo2  | 362176 | 1,63 | up   |
| 5773293 | 7080819 | 1081190 | LIM homeobox 1                                                  | Lhx1  | 257634 | 2,09 | down |
| 5775901 | 7080819 | 1081192 | LIM homeobox 1                                                  | Lhx1  | 257634 | 1,03 | up   |
| 6381572 | 7080819 | 1081193 | LIM homeobox 1                                                  | Lhx1  | 257634 | 1,13 | up   |
| 6409441 | 7080819 | 1081189 | LIM homeobox 1                                                  | Lhx1  | 257634 | 1,44 | down |
| 6419788 | 7080819 | 1081191 | LIM homeobox 1                                                  | Lhx1  | 257634 | 1,18 | down |
| 6556360 | 7080819 | 1081193 | LIM homeobox 1                                                  | Lhx1  | 257634 | 1,16 | up   |
| 5618077 | 7314646 | 1658589 | lin-7 homolog a (C. elegans)                                    | Lin7a | 85327  | 1,23 | up   |
| 5644522 | 7314646 | 1658586 | lin-7 homolog a (C. elegans)                                    | Lin7a | 85327  | 1,03 | down |
| 5658848 | 7314646 | 1658590 | lin-7 homolog a (C. elegans)                                    | Lin7a | 85327  | 2,18 | down |
| 5686014 | 7314646 | 1658587 | lin-7 homolog a (C. elegans)                                    | Lin7a | 85327  | 1,03 | down |
| 5951158 | 7314646 | 1658585 | lin-7 homolog a (C. elegans)                                    | Lin7a | 85327  | 1,21 | down |
| 6423753 | 7314646 | 1658588 | lin-7 homolog a (C. elegans)                                    | Lin7a | 85327  | 1,23 | down |
| 5650231 | 7330737 | 1697215 | lipase maturation factor 2                                      | Lmf2  | 315218 | 1,05 | down |
| 5688098 | 7330737 | 1697220 | lipase maturation factor 2                                      | Lmf2  | 315218 | 1,21 | down |
| 5717510 | 7330737 | 1697218 | lipase maturation factor 2                                      | Lmf2  | 315218 | 1,34 | down |
| 5883742 | 7330737 | 1697221 | lipase maturation factor 2                                      | Lmf2  | 315218 | 1,27 | down |
| 5900183 | 7330737 | 1697222 | lipase maturation factor 2                                      | Lmf2  | 315218 | 1,33 | up   |
| 5913689 | 7330737 | 1697221 | lipase maturation factor 2                                      | Lmf2  | 315218 | 1,20 | down |
| 5945155 | 7330737 | 1697218 | lipase maturation factor 2                                      | Lmf2  | 315218 | 1,29 | down |
| 5976987 | 7330737 | 1697219 | lipase maturation factor 2                                      | Lmf2  | 315218 | 1,26 | down |
| 5996342 | 7330737 | 1697218 | lipase maturation factor 2                                      | Lmf2  | 315218 | 1,16 | down |
| 6030490 | 7330737 | 1697222 | lipase maturation factor 2                                      | Lmf2  | 315218 | 1,13 | up   |
| 6044751 | 7330737 | 1697221 | lipase maturation factor 2                                      | Lmf2  | 315218 | 1,30 | up   |
| 6156084 | 7330737 | 1697216 | lipase maturation factor 2                                      | Lmf2  | 315218 | 2,56 | down |
| 6176711 | 7330737 | 1697215 | lipase maturation factor 2                                      | Lmf2  | 315218 | 1,20 | up   |
| 6229190 | 7330737 | 1697220 | lipase maturation factor 2                                      | Lmf2  | 315218 | 1,33 | down |
| 6310459 | 7330737 | 1697222 | lipase maturation factor 2                                      | Lmf2  | 315218 | 1,46 | down |
| 6466687 | 7330737 | 1697217 | lipase maturation factor 2                                      | Lmf2  | 315218 | 1,09 | down |
| 6473490 | 7330737 | 1697217 | lipase maturation factor 2                                      | Lmf2  | 315218 | 1,20 | up   |
| 6549287 | 7330737 | 1697222 | lipase maturation factor 2                                      | Lmf2  | 315218 | 1,67 | up   |
| 6596861 | 7330737 | 1697221 | lipase maturation factor 2                                      | Lmf2  | 315218 | 1,11 | down |
| 6626475 | 7330737 | 1697221 | lipase maturation factor 2                                      | Lmf2  | 315218 | 1,09 | up   |
| 6646248 | 7330737 | 1697215 | lipase maturation factor 2                                      | Lmf2  | 315218 | 1,18 | down |
| 5833224 | 7225317 | 1435354 | lipocalin 10                                                    | Lcn10 | 499756 | 1,07 | up   |
| 5969550 | 7225317 | 1435357 | lipocalin 10                                                    | Lcn10 | 499756 | 1,00 | up   |
| 6305506 | 7225317 | 1435359 | lipocalin 10                                                    | Lcn10 | 499756 | 3,32 | up   |
| 6433488 | 7225317 | 1435361 | lipocalin 10                                                    | Lcn10 | 499756 | 1,15 | up   |
| 6447730 | 7225317 | 1435355 | lipocalin 10                                                    | Lcn10 | 499756 | 1,06 | down |
| 6601901 | 7225317 | 1435360 | lipocalin 10                                                    | Lcn10 | 499756 | 1,17 | down |
| 6658397 | 7225317 | 1435362 | lipocalin 10                                                    | Lcn10 | 499756 | 1,11 | down |
| 5705579 | 7237648 | 1467240 | lipocalin 2                                                     | Lcn2  | 170496 | 2,07 | up   |
| 5850941 | 7237648 | 1467244 | lipocalin 2                                                     | Lcn2  | 170496 | 1,99 | down |
| 5929350 | 7237648 | 1467243 | lipocalin 2                                                     | Lcn2  | 170496 | 1,45 | up   |
| 6086593 | 7237648 | 1467242 | lipocalin 2                                                     | Lcn2  | 170496 | 1,37 | up   |
| 6240332 | 7237648 | 1467239 | lipocalin 2                                                     | Lcn2  | 170496 | 1,12 | up   |
| 6498785 | 7237648 | 1467241 | lipocalin 2                                                     | Lcn2  | 170496 | 2,13 | up   |
| 6736095 | 7237648 | 1467244 | lipocalin 2                                                     | Lcn2  | 170496 | 1,66 | down |



|         |         |         |                                                             |                    |                   |      |      |
|---------|---------|---------|-------------------------------------------------------------|--------------------|-------------------|------|------|
| 5724600 | 7260636 | 1524325 | lipoma HMGIC fusion partner-like 3                          | Lhfp13             | 499977            | 1,01 | down |
| 6105560 | 7260636 | 1524325 | lipoma HMGIC fusion partner-like 3                          | Lhfp13             | 499977            | 1,07 | down |
| 6535977 | 7260636 | 1524332 | lipoma HMGIC fusion partner-like 3                          | Lhfp13             | 499977            | 1,01 | up   |
| 6546515 | 7260636 | 1524325 | lipoma HMGIC fusion partner-like 3                          | Lhfp13             | 499977            | 1,00 | up   |
| 6597424 | 7260636 | 1524325 | lipoma HMGIC fusion partner-like 3                          | Lhfp13             | 499977            | 1,27 | down |
| 6700359 | 7260636 | 1524367 | lipoma HMGIC fusion partner-like 3                          | Lhfp13             | 499977            | 3,37 | down |
| 5661839 | 7234696 | 1460025 | lipopolysaccharide binding protein                          | Lbp                | 29469             | 1,02 | up   |
| 5722680 | 7234696 | 1460012 | lipopolysaccharide binding protein                          | Lbp                | 29469             | 1,08 | down |
| 5752210 | 7234696 | 1460023 | lipopolysaccharide binding protein                          | Lbp                | 29469             | 1,27 | up   |
| 5901546 | 7234696 | 1460015 | lipopolysaccharide binding protein                          | Lbp                | 29469             | 1,06 | down |
| 6028665 | 7234696 | 1460017 | lipopolysaccharide binding protein                          | Lbp                | 29469             | 1,05 | up   |
| 6170150 | 7234696 | 1460022 | lipopolysaccharide binding protein                          | Lbp                | 29469             | 1,71 | up   |
| 6196936 | 7234696 | 1460019 | lipopolysaccharide binding protein                          | Lbp                | 29469             | 1,36 | down |
| 6197141 | 7234696 | 1460021 | lipopolysaccharide binding protein                          | Lbp                | 29469             | 1,19 | up   |
| 6271251 | 7234696 | 1460013 | lipopolysaccharide binding protein                          | Lbp                | 29469             | 1,49 | down |
| 6310866 | 7234696 | 1460011 | lipopolysaccharide binding protein                          | Lbp                | 29469             | 1,39 | down |
| 6314171 | 7234696 | 1460018 | lipopolysaccharide binding protein                          | Lbp                | 29469             | 1,00 | up   |
| 6315952 | 7234696 | 1460020 | lipopolysaccharide binding protein                          | Lbp                | 29469             | 1,15 | down |
| 6412887 | 7234696 | 1460014 | lipopolysaccharide binding protein                          | Lbp                | 29469             | 1,73 | up   |
| 6466834 | 7234696 | 1460024 | lipopolysaccharide binding protein                          | Lbp                | 29469             | 1,37 | up   |
| 6637226 | 7234696 | 1460010 | lipopolysaccharide binding protein                          | Lbp                | 29469             | 1,16 | down |
| 6658862 | 7234696 | 1460016 | lipopolysaccharide binding protein                          | Lbp                | 29469             | 2,81 | up   |
| 5758699 | 7027759 | 956126  | LOC361485                                                   | RGD1309374         | 361485            | 1,11 | down |
| 5880669 | 7027759 | 956126  | LOC361485                                                   | RGD1309374         | 361485            | 1,10 | down |
| 5896288 | 7027759 | 956121  | LOC361485                                                   | RGD1309374         | 361485            | 1,11 | down |
| 5926377 | 7027759 | 956122  | LOC361485                                                   | RGD1309374         | 361485            | 1,13 | up   |
| 6116959 | 7027759 | 956126  | LOC361485                                                   | RGD1309374         | 361485            | 1,16 | up   |
| 6128433 | 7027759 | 956126  | LOC361485                                                   | RGD1309374         | 361485            | 1,14 | up   |
| 6276710 | 7027759 | 956126  | LOC361485                                                   | RGD1309374         | 361485            | 1,19 | down |
| 6370686 | 7027759 | 956130  | LOC361485                                                   | RGD1309374         | 361485            | 2,44 | up   |
| 6429195 | 7027759 | 956127  | LOC361485                                                   | RGD1309374         | 361485            | 1,23 | down |
| 6485794 | 7027759 | 956123  | LOC361485                                                   | RGD1309374         | 361485            | 1,03 | up   |
| 6555707 | 7027759 | 956127  | LOC361485                                                   | RGD1309374         | 361485            | 1,49 | up   |
| 6564279 | 7027759 | 956126  | LOC361485                                                   | RGD1309374         | 361485            | 1,21 | up   |
| 6698310 | 7027759 | 956124  | LOC361485                                                   | RGD1309374         | 361485            | 1,05 | up   |
| 6700555 | 7027759 | 956126  | LOC361485                                                   | RGD1309374         | 361485            | 1,09 | up   |
| 5766148 | 7027759 | 956139  | LOC361485 /// similar to chromosome 6 open reading frame 70 | 1309374 /// RGD15c | 361485 /// 499055 | 1,26 | down |
| 5766651 | 7027759 | 956139  | LOC361485 /// similar to chromosome 6 open reading frame 70 | 1309374 /// RGD15c | 361485 /// 499055 | 1,40 | down |
| 5934635 | 7027759 | 956139  | LOC361485 /// similar to chromosome 6 open reading frame 70 | 1309374 /// RGD15c | 361485 /// 499055 | 1,76 | down |
| 6139078 | 7027759 | 956138  | LOC361485 /// similar to chromosome 6 open reading frame 70 | 1309374 /// RGD15c | 361485 /// 499055 | 1,05 | up   |
| 6255866 | 7027759 | 956141  | LOC361485 /// similar to chromosome 6 open reading frame 70 | 1309374 /// RGD15c | 361485 /// 499055 | 1,09 | down |
| 6266144 | 7027759 | 956140  | LOC361485 /// similar to chromosome 6 open reading frame 70 | 1309374 /// RGD15c | 361485 /// 499055 | 1,08 | down |
| 6467882 | 7027759 | 956142  | LOC361485 /// similar to chromosome 6 open reading frame 70 | 1309374 /// RGD15c | 361485 /// 499055 | 1,43 | down |
| 6486622 | 7027759 | 956120  | LOC361485 /// similar to chromosome 6 open reading frame 70 | 1309374 /// RGD15c | 361485 /// 499055 | 1,10 | down |
| 6516032 | 7027759 | 956142  | LOC361485 /// similar to chromosome 6 open reading frame 70 | 1309374 /// RGD15c | 361485 /// 499055 | 1,03 | up   |
| 6715765 | 7027759 | 956135  | LOC361485 /// similar to chromosome 6 open reading frame 70 | 1309374 /// RGD15c | 361485 /// 499055 | 1,36 | down |
| 5640404 | 7367969 | 1789103 | lon peptidase 1, mitochondrial                              | Lonp1              | 170916            | 1,13 | down |
| 5899658 | 7367969 | 1789092 | lon peptidase 1, mitochondrial                              | Lonp1              | 170916            | 1,10 | down |
| 6022174 | 7367969 | 1789095 | lon peptidase 1, mitochondrial                              | Lonp1              | 170916            | 1,23 | down |
| 6023605 | 7367969 | 1789091 | lon peptidase 1, mitochondrial                              | Lonp1              | 170916            | 1,14 | down |
| 6036187 | 7367969 | 1789093 | lon peptidase 1, mitochondrial                              | Lonp1              | 170916            | 1,14 | up   |
| 6082057 | 7367969 | 1789105 | lon peptidase 1, mitochondrial                              | Lonp1              | 170916            | 1,29 | down |
| 6104963 | 7367969 | 1789090 | lon peptidase 1, mitochondrial                              | Lonp1              | 170916            | 1,49 | up   |
| 6130603 | 7367969 | 1789105 | lon peptidase 1, mitochondrial                              | Lonp1              | 170916            | 1,59 | down |
| 6173497 | 7367969 | 1789101 | lon peptidase 1, mitochondrial                              | Lonp1              | 170916            | 1,09 | up   |
| 6194718 | 7367969 | 1789103 | lon peptidase 1, mitochondrial                              | Lonp1              | 170916            | 1,02 | up   |

|         |         |         |                                                    |        |        |      |      |
|---------|---------|---------|----------------------------------------------------|--------|--------|------|------|
| 6228511 | 7367969 | 1789094 | lon peptidase 1, mitochondrial                     | Lonp1  | 170916 | 1,16 | up   |
| 6263106 | 7367969 | 1789099 | lon peptidase 1, mitochondrial                     | Lonp1  | 170916 | 1,02 | up   |
| 6264914 | 7367969 | 1789104 | lon peptidase 1, mitochondrial                     | Lonp1  | 170916 | 1,06 | up   |
| 6305909 | 7367969 | 1789102 | lon peptidase 1, mitochondrial                     | Lonp1  | 170916 | 1,06 | down |
| 6414782 | 7367969 | 1789100 | lon peptidase 1, mitochondrial                     | Lonp1  | 170916 | 1,17 | up   |
| 6431954 | 7367969 | 1789088 | lon peptidase 1, mitochondrial                     | Lonp1  | 170916 | 1,00 | down |
| 6479094 | 7367969 | 1789087 | lon peptidase 1, mitochondrial                     | Lonp1  | 170916 | 1,63 | down |
| 6604495 | 7367969 | 1789094 | lon peptidase 1, mitochondrial                     | Lonp1  | 170916 | 1,19 | up   |
| 6642405 | 7367969 | 1789097 | lon peptidase 1, mitochondrial                     | Lonp1  | 170916 | 1,02 | up   |
| 6665246 | 7367969 | 1789105 | lon peptidase 1, mitochondrial                     | Lonp1  | 170916 | 1,05 | down |
| 5659523 | 7378981 | 1818553 | LON peptidase N-terminal domain and ring finger 3  | Lonrf3 | 298322 | 1,11 | down |
| 5673134 | 7378981 | 1818536 | LON peptidase N-terminal domain and ring finger 3  | Lonrf3 | 298322 | 1,47 | up   |
| 5731338 | 7378981 | 1818538 | LON peptidase N-terminal domain and ring finger 3  | Lonrf3 | 298322 | 1,23 | up   |
| 5799332 | 7378981 | 1818551 | LON peptidase N-terminal domain and ring finger 3  | Lonrf3 | 298322 | 1,13 | down |
| 6124245 | 7378981 | 1818553 | LON peptidase N-terminal domain and ring finger 3  | Lonrf3 | 298322 | 1,23 | up   |
| 6138296 | 7378981 | 1818545 | LON peptidase N-terminal domain and ring finger 3  | Lonrf3 | 298322 | 1,15 | up   |
| 6140431 | 7378981 | 1818546 | LON peptidase N-terminal domain and ring finger 3  | Lonrf3 | 298322 | 1,34 | down |
| 6176023 | 7378981 | 1818537 | LON peptidase N-terminal domain and ring finger 3  | Lonrf3 | 298322 | 1,25 | up   |
| 6226851 | 7378981 | 1818533 | LON peptidase N-terminal domain and ring finger 3  | Lonrf3 | 298322 | 1,66 | down |
| 6281895 | 7378981 | 1818545 | LON peptidase N-terminal domain and ring finger 3  | Lonrf3 | 298322 | 1,14 | down |
| 6288356 | 7378981 | 1818543 | LON peptidase N-terminal domain and ring finger 3  | Lonrf3 | 298322 | 1,50 | up   |
| 6377183 | 7378981 | 1818541 | LON peptidase N-terminal domain and ring finger 3  | Lonrf3 | 298322 | 1,02 | up   |
| 6511757 | 7378981 | 1818548 | LON peptidase N-terminal domain and ring finger 3  | Lonrf3 | 298322 | 1,47 | up   |
| 6547979 | 7378981 | 1818553 | LON peptidase N-terminal domain and ring finger 3  | Lonrf3 | 298322 | 1,34 | up   |
| 6671178 | 7378981 | 1818539 | LON peptidase N-terminal domain and ring finger 3  | Lonrf3 | 298322 | 1,24 | down |
| 6714204 | 7378981 | 1818534 | LON peptidase N-terminal domain and ring finger 3  | Lonrf3 | 298322 | 1,07 | up   |
| 6714539 | 7378981 | 1818554 | LON peptidase N-terminal domain and ring finger 3  | Lonrf3 | 298322 | 1,12 | down |
| 5638682 | 7230017 | 1447452 | low density lipoprotein receptor-related protein 4 | Lrp4   | 83469  | 2,28 | up   |
| 5658261 | 7230017 | 1447428 | low density lipoprotein receptor-related protein 4 | Lrp4   | 83469  | 1,33 | down |
| 5683726 | 7230017 | 1447438 | low density lipoprotein receptor-related protein 4 | Lrp4   | 83469  | 1,01 | down |
| 5720411 | 7230017 | 1447459 | low density lipoprotein receptor-related protein 4 | Lrp4   | 83469  | 1,41 | down |
| 5721915 | 7230017 | 1447449 | low density lipoprotein receptor-related protein 4 | Lrp4   | 83469  | 1,44 | up   |
| 5851977 | 7230017 | 1447431 | low density lipoprotein receptor-related protein 4 | Lrp4   | 83469  | 1,30 | up   |
| 5917942 | 7230017 | 1447459 | low density lipoprotein receptor-related protein 4 | Lrp4   | 83469  | 1,21 | down |
| 5938428 | 7230017 | 1447440 | low density lipoprotein receptor-related protein 4 | Lrp4   | 83469  | 1,06 | up   |
| 5939938 | 7230017 | 1447461 | low density lipoprotein receptor-related protein 4 | Lrp4   | 83469  | 1,06 | up   |
| 5965632 | 7230017 | 1447453 | low density lipoprotein receptor-related protein 4 | Lrp4   | 83469  | 1,06 | down |
| 5979647 | 7230017 | 1447435 | low density lipoprotein receptor-related protein 4 | Lrp4   | 83469  | 1,26 | down |
| 6047868 | 7230017 | 1447437 | low density lipoprotein receptor-related protein 4 | Lrp4   | 83469  | 1,24 | down |
| 6057267 | 7230017 | 1447432 | low density lipoprotein receptor-related protein 4 | Lrp4   | 83469  | 1,36 | up   |
| 6062595 | 7230017 | 1447454 | low density lipoprotein receptor-related protein 4 | Lrp4   | 83469  | 1,15 | down |
| 6094461 | 7230017 | 1447434 | low density lipoprotein receptor-related protein 4 | Lrp4   | 83469  | 1,12 | down |
| 6167817 | 7230017 | 1447450 | low density lipoprotein receptor-related protein 4 | Lrp4   | 83469  | 1,14 | up   |
| 6223672 | 7230017 | 1447427 | low density lipoprotein receptor-related protein 4 | Lrp4   | 83469  | 1,02 | up   |
| 6247363 | 7230017 | 1447455 | low density lipoprotein receptor-related protein 4 | Lrp4   | 83469  | 1,08 | up   |
| 6270232 | 7230017 | 1447426 | low density lipoprotein receptor-related protein 4 | Lrp4   | 83469  | 1,01 | down |
| 6270827 | 7230017 | 1447460 | low density lipoprotein receptor-related protein 4 | Lrp4   | 83469  | 1,36 | down |
| 6278375 | 7230017 | 1447461 | low density lipoprotein receptor-related protein 4 | Lrp4   | 83469  | 1,87 | down |
| 6291009 | 7230017 | 1447464 | low density lipoprotein receptor-related protein 4 | Lrp4   | 83469  | 1,18 | up   |
| 6307504 | 7230017 | 1447432 | low density lipoprotein receptor-related protein 4 | Lrp4   | 83469  | 1,03 | up   |
| 6312146 | 7230017 | 1447441 | low density lipoprotein receptor-related protein 4 | Lrp4   | 83469  | 1,07 | down |
| 6325618 | 7230017 | 1447440 | low density lipoprotein receptor-related protein 4 | Lrp4   | 83469  | 1,09 | down |
| 6334988 | 7230017 | 1447464 | low density lipoprotein receptor-related protein 4 | Lrp4   | 83469  | 1,01 | down |
| 6340691 | 7230017 | 1447433 | low density lipoprotein receptor-related protein 4 | Lrp4   | 83469  | 1,11 | down |
| 6348580 | 7230017 | 1447444 | low density lipoprotein receptor-related protein 4 | Lrp4   | 83469  | 1,77 | down |
| 6371891 | 7230017 | 1447451 | low density lipoprotein receptor-related protein 4 | Lrp4   | 83469  | 1,02 | up   |

|         |         |         |                                                                       |        |        |      |      |
|---------|---------|---------|-----------------------------------------------------------------------|--------|--------|------|------|
| 6373741 | 7230017 | 1447462 | low density lipoprotein receptor-related protein 4                    | Lrp4   | 83469  | 1,04 | up   |
| 6389226 | 7230017 | 1447447 | low density lipoprotein receptor-related protein 4                    | Lrp4   | 83469  | 1,00 | up   |
| 6406294 | 7230017 | 1447456 | low density lipoprotein receptor-related protein 4                    | Lrp4   | 83469  | 1,23 | up   |
| 6407906 | 7230017 | 1447463 | low density lipoprotein receptor-related protein 4                    | Lrp4   | 83469  | 1,13 | down |
| 6415257 | 7230017 | 1447436 | low density lipoprotein receptor-related protein 4                    | Lrp4   | 83469  | 1,03 | up   |
| 6424539 | 7230017 | 1447429 | low density lipoprotein receptor-related protein 4                    | Lrp4   | 83469  | 1,20 | down |
| 6426653 | 7230017 | 1447457 | low density lipoprotein receptor-related protein 4                    | Lrp4   | 83469  | 1,27 | down |
| 6442275 | 7230017 | 1447441 | low density lipoprotein receptor-related protein 4                    | Lrp4   | 83469  | 1,78 | up   |
| 6446123 | 7230017 | 1447464 | low density lipoprotein receptor-related protein 4                    | Lrp4   | 83469  | 1,38 | down |
| 6448241 | 7230017 | 1447445 | low density lipoprotein receptor-related protein 4                    | Lrp4   | 83469  | 1,33 | up   |
| 6482041 | 7230017 | 1447446 | low density lipoprotein receptor-related protein 4                    | Lrp4   | 83469  | 1,14 | up   |
| 6548899 | 7230017 | 1447458 | low density lipoprotein receptor-related protein 4                    | Lrp4   | 83469  | 1,03 | up   |
| 6553650 | 7230017 | 1447443 | low density lipoprotein receptor-related protein 4                    | Lrp4   | 83469  | 1,32 | up   |
| 6559403 | 7230017 | 1447430 | low density lipoprotein receptor-related protein 4                    | Lrp4   | 83469  | 1,01 | up   |
| 6576969 | 7230017 | 1447448 | low density lipoprotein receptor-related protein 4                    | Lrp4   | 83469  | 1,43 | down |
| 6579441 | 7230017 | 1447439 | low density lipoprotein receptor-related protein 4                    | Lrp4   | 83469  | 1,02 | up   |
| 6735012 | 7230017 | 1447442 | low density lipoprotein receptor-related protein 4                    | Lrp4   | 83469  | 1,03 | up   |
| 5704707 | 7120169 | 1177813 | low density lipoprotein receptor-related protein associated protein 1 | Lrpap1 | 116565 | 1,21 | down |
| 5883930 | 7120169 | 1177820 | low density lipoprotein receptor-related protein associated protein 1 | Lrpap1 | 116565 | 1,09 | down |
| 5925104 | 7120169 | 1177821 | low density lipoprotein receptor-related protein associated protein 1 | Lrpap1 | 116565 | 1,10 | down |
| 5942690 | 7120169 | 1177821 | low density lipoprotein receptor-related protein associated protein 1 | Lrpap1 | 116565 | 1,10 | up   |
| 6049719 | 7120169 | 1177817 | low density lipoprotein receptor-related protein associated protein 1 | Lrpap1 | 116565 | 1,15 | down |
| 6163916 | 7120169 | 1177812 | low density lipoprotein receptor-related protein associated protein 1 | Lrpap1 | 116565 | 1,03 | up   |
| 6221904 | 7120169 | 1177816 | low density lipoprotein receptor-related protein associated protein 1 | Lrpap1 | 116565 | 1,08 | down |
| 6297442 | 7120169 | 1177818 | low density lipoprotein receptor-related protein associated protein 1 | Lrpap1 | 116565 | 1,20 | up   |
| 6493346 | 7120169 | 1177814 | low density lipoprotein receptor-related protein associated protein 1 | Lrpap1 | 116565 | 2,33 | down |
| 6580250 | 7120169 | 1177815 | low density lipoprotein receptor-related protein associated protein 1 | Lrpap1 | 116565 | 1,03 | up   |
| 6623698 | 7120169 | 1177821 | low density lipoprotein receptor-related protein associated protein 1 | Lrpap1 | 116565 | 1,33 | up   |
| 5618667 | 7238252 | 1469118 | low density lipoprotein-related protein 1B (deleted in tumors)        | Lrp1b  | 311926 | 1,31 | down |
| 5627327 | 7238252 | 1469119 | low density lipoprotein-related protein 1B (deleted in tumors)        | Lrp1b  | 311926 | 1,12 | up   |
| 5628551 | 7238252 | 1469165 | low density lipoprotein-related protein 1B (deleted in tumors)        | Lrp1b  | 311926 | 2,25 | down |
| 5671328 | 7238252 | 1469181 | low density lipoprotein-related protein 1B (deleted in tumors)        | Lrp1b  | 311926 | 1,01 | down |
| 5672926 | 7238252 | 1469211 | low density lipoprotein-related protein 1B (deleted in tumors)        | Lrp1b  | 311926 | 1,00 | up   |
| 5678825 | 7238252 | 1469195 | low density lipoprotein-related protein 1B (deleted in tumors)        | Lrp1b  | 311926 | 1,06 | up   |
| 5680816 | 7238252 | 1469257 | low density lipoprotein-related protein 1B (deleted in tumors)        | Lrp1b  | 311926 | 1,21 | down |
| 5684574 | 7238252 | 1469121 | low density lipoprotein-related protein 1B (deleted in tumors)        | Lrp1b  | 311926 | 1,41 | down |
| 5695000 | 7238252 | 1469213 | low density lipoprotein-related protein 1B (deleted in tumors)        | Lrp1b  | 311926 | 1,56 | down |
| 5695607 | 7238252 | 1469138 | low density lipoprotein-related protein 1B (deleted in tumors)        | Lrp1b  | 311926 | 1,21 | up   |
| 5696816 | 7238252 | 1469203 | low density lipoprotein-related protein 1B (deleted in tumors)        | Lrp1b  | 311926 | 1,40 | down |
| 5703403 | 7238252 | 1469106 | low density lipoprotein-related protein 1B (deleted in tumors)        | Lrp1b  | 311926 | 1,09 | down |
| 5706610 | 7238252 | 1469178 | low density lipoprotein-related protein 1B (deleted in tumors)        | Lrp1b  | 311926 | 1,00 | down |
| 5720443 | 7238252 | 1469153 | low density lipoprotein-related protein 1B (deleted in tumors)        | Lrp1b  | 311926 | 1,12 | down |
| 5731248 | 7238252 | 1469256 | low density lipoprotein-related protein 1B (deleted in tumors)        | Lrp1b  | 311926 | 1,33 | up   |
| 5738146 | 7238252 | 1469099 | low density lipoprotein-related protein 1B (deleted in tumors)        | Lrp1b  | 311926 | 1,02 | down |
| 5739997 | 7238252 | 1469235 | low density lipoprotein-related protein 1B (deleted in tumors)        | Lrp1b  | 311926 | 1,29 | down |
| 5752702 | 7238252 | 1469086 | low density lipoprotein-related protein 1B (deleted in tumors)        | Lrp1b  | 311926 | 1,27 | up   |
| 5769587 | 7238252 | 1469175 | low density lipoprotein-related protein 1B (deleted in tumors)        | Lrp1b  | 311926 | 1,34 | up   |
| 5793289 | 7238252 | 1469132 | low density lipoprotein-related protein 1B (deleted in tumors)        | Lrp1b  | 311926 | 2,29 | up   |
| 5793520 | 7238252 | 1469140 | low density lipoprotein-related protein 1B (deleted in tumors)        | Lrp1b  | 311926 | 1,00 | up   |
| 5820909 | 7238252 | 1469174 | low density lipoprotein-related protein 1B (deleted in tumors)        | Lrp1b  | 311926 | 1,03 | down |
| 5833551 | 7238252 | 1469144 | low density lipoprotein-related protein 1B (deleted in tumors)        | Lrp1b  | 311926 | 1,46 | down |
| 5841412 | 7238252 | 1469244 | low density lipoprotein-related protein 1B (deleted in tumors)        | Lrp1b  | 311926 | 1,13 | down |
| 5855204 | 7238252 | 1469192 | low density lipoprotein-related protein 1B (deleted in tumors)        | Lrp1b  | 311926 | 1,62 | up   |
| 5862882 | 7238252 | 1469109 | low density lipoprotein-related protein 1B (deleted in tumors)        | Lrp1b  | 311926 | 1,06 | up   |
| 5867359 | 7238252 | 1469131 | low density lipoprotein-related protein 1B (deleted in tumors)        | Lrp1b  | 311926 | 1,02 | down |
| 5884529 | 7238252 | 1469139 | low density lipoprotein-related protein 1B (deleted in tumors)        | Lrp1b  | 311926 | 1,01 | down |

|         |         |         |                                                                |       |        |      |      |
|---------|---------|---------|----------------------------------------------------------------|-------|--------|------|------|
| 5910494 | 7238252 | 1469152 | low density lipoprotein-related protein 1B (deleted in tumors) | Lrp1b | 311926 | 1,45 | down |
| 5934386 | 7238252 | 1469085 | low density lipoprotein-related protein 1B (deleted in tumors) | Lrp1b | 311926 | 1,05 | down |
| 5949965 | 7238252 | 1469112 | low density lipoprotein-related protein 1B (deleted in tumors) | Lrp1b | 311926 | 1,22 | down |
| 5968084 | 7238252 | 1469135 | low density lipoprotein-related protein 1B (deleted in tumors) | Lrp1b | 311926 | 1,11 | up   |
| 5977384 | 7238252 | 1469192 | low density lipoprotein-related protein 1B (deleted in tumors) | Lrp1b | 311926 | 1,16 | up   |
| 5995370 | 7238252 | 1469096 | low density lipoprotein-related protein 1B (deleted in tumors) | Lrp1b | 311926 | 1,03 | down |
| 5995793 | 7238252 | 1469143 | low density lipoprotein-related protein 1B (deleted in tumors) | Lrp1b | 311926 | 1,07 | down |
| 6010827 | 7238252 | 1469175 | low density lipoprotein-related protein 1B (deleted in tumors) | Lrp1b | 311926 | 1,03 | down |
| 6011816 | 7238252 | 1469200 | low density lipoprotein-related protein 1B (deleted in tumors) | Lrp1b | 311926 | 1,23 | down |
| 6028197 | 7238252 | 1469205 | low density lipoprotein-related protein 1B (deleted in tumors) | Lrp1b | 311926 | 1,03 | down |
| 6028623 | 7238252 | 1469196 | low density lipoprotein-related protein 1B (deleted in tumors) | Lrp1b | 311926 | 1,06 | up   |
| 6029978 | 7238252 | 1469164 | low density lipoprotein-related protein 1B (deleted in tumors) | Lrp1b | 311926 | 1,19 | down |
| 6047191 | 7238252 | 1469122 | low density lipoprotein-related protein 1B (deleted in tumors) | Lrp1b | 311926 | 1,16 | down |
| 6053733 | 7238252 | 1469110 | low density lipoprotein-related protein 1B (deleted in tumors) | Lrp1b | 311926 | 1,26 | down |
| 6056268 | 7238252 | 1469122 | low density lipoprotein-related protein 1B (deleted in tumors) | Lrp1b | 311926 | 1,61 | up   |
| 6067155 | 7238252 | 1469137 | low density lipoprotein-related protein 1B (deleted in tumors) | Lrp1b | 311926 | 1,05 | up   |
| 6076265 | 7238252 | 1469240 | low density lipoprotein-related protein 1B (deleted in tumors) | Lrp1b | 311926 | 1,00 | up   |
| 6112602 | 7238252 | 1469097 | low density lipoprotein-related protein 1B (deleted in tumors) | Lrp1b | 311926 | 1,07 | up   |
| 6112728 | 7238252 | 1469085 | low density lipoprotein-related protein 1B (deleted in tumors) | Lrp1b | 311926 | 1,03 | up   |
| 6114321 | 7238252 | 1469166 | low density lipoprotein-related protein 1B (deleted in tumors) | Lrp1b | 311926 | 1,12 | down |
| 6129854 | 7238252 | 1469107 | low density lipoprotein-related protein 1B (deleted in tumors) | Lrp1b | 311926 | 1,52 | down |
| 6144650 | 7238252 | 1469214 | low density lipoprotein-related protein 1B (deleted in tumors) | Lrp1b | 311926 | 1,06 | down |
| 6159591 | 7238252 | 1469168 | low density lipoprotein-related protein 1B (deleted in tumors) | Lrp1b | 311926 | 1,77 | up   |
| 6163526 | 7238252 | 1469223 | low density lipoprotein-related protein 1B (deleted in tumors) | Lrp1b | 311926 | 1,26 | down |
| 6183215 | 7238252 | 1469181 | low density lipoprotein-related protein 1B (deleted in tumors) | Lrp1b | 311926 | 1,00 | up   |
| 6184171 | 7238252 | 1469136 | low density lipoprotein-related protein 1B (deleted in tumors) | Lrp1b | 311926 | 1,21 | up   |
| 6193440 | 7238252 | 1469093 | low density lipoprotein-related protein 1B (deleted in tumors) | Lrp1b | 311926 | 1,20 | down |
| 6202854 | 7238252 | 1469201 | low density lipoprotein-related protein 1B (deleted in tumors) | Lrp1b | 311926 | 1,08 | up   |
| 6217371 | 7238252 | 1469127 | low density lipoprotein-related protein 1B (deleted in tumors) | Lrp1b | 311926 | 1,02 | down |
| 6237994 | 7238252 | 1469104 | low density lipoprotein-related protein 1B (deleted in tumors) | Lrp1b | 311926 | 1,10 | down |
| 6264104 | 7238252 | 1469191 | low density lipoprotein-related protein 1B (deleted in tumors) | Lrp1b | 311926 | 1,39 | up   |
| 6281145 | 7238252 | 1469132 | low density lipoprotein-related protein 1B (deleted in tumors) | Lrp1b | 311926 | 1,02 | up   |
| 6284958 | 7238252 | 1469163 | low density lipoprotein-related protein 1B (deleted in tumors) | Lrp1b | 311926 | 1,03 | up   |
| 6313661 | 7238252 | 1469224 | low density lipoprotein-related protein 1B (deleted in tumors) | Lrp1b | 311926 | 1,16 | up   |
| 6319851 | 7238252 | 1469142 | low density lipoprotein-related protein 1B (deleted in tumors) | Lrp1b | 311926 | 1,06 | down |
| 6335297 | 7238252 | 1469182 | low density lipoprotein-related protein 1B (deleted in tumors) | Lrp1b | 311926 | 1,29 | down |
| 6344375 | 7238252 | 1469101 | low density lipoprotein-related protein 1B (deleted in tumors) | Lrp1b | 311926 | 1,00 | up   |
| 6357664 | 7238252 | 1469198 | low density lipoprotein-related protein 1B (deleted in tumors) | Lrp1b | 311926 | 1,54 | up   |
| 6365964 | 7238252 | 1469222 | low density lipoprotein-related protein 1B (deleted in tumors) | Lrp1b | 311926 | 1,49 | down |
| 6379417 | 7238252 | 1469199 | low density lipoprotein-related protein 1B (deleted in tumors) | Lrp1b | 311926 | 1,04 | down |
| 6414541 | 7238252 | 1469204 | low density lipoprotein-related protein 1B (deleted in tumors) | Lrp1b | 311926 | 1,24 | down |
| 6426334 | 7238252 | 1469089 | low density lipoprotein-related protein 1B (deleted in tumors) | Lrp1b | 311926 | 1,03 | down |
| 6427665 | 7238252 | 1469095 | low density lipoprotein-related protein 1B (deleted in tumors) | Lrp1b | 311926 | 1,14 | up   |
| 6443747 | 7238252 | 1469136 | low density lipoprotein-related protein 1B (deleted in tumors) | Lrp1b | 311926 | 1,26 | down |
| 6476270 | 7238252 | 1469153 | low density lipoprotein-related protein 1B (deleted in tumors) | Lrp1b | 311926 | 1,00 | up   |
| 6481078 | 7238252 | 1469102 | low density lipoprotein-related protein 1B (deleted in tumors) | Lrp1b | 311926 | 1,07 | down |
| 6485438 | 7238252 | 1469168 | low density lipoprotein-related protein 1B (deleted in tumors) | Lrp1b | 311926 | 1,37 | up   |
| 6495311 | 7238252 | 1469152 | low density lipoprotein-related protein 1B (deleted in tumors) | Lrp1b | 311926 | 1,07 | down |
| 6496034 | 7238252 | 1469216 | low density lipoprotein-related protein 1B (deleted in tumors) | Lrp1b | 311926 | 1,01 | down |
| 6524210 | 7238252 | 1469196 | low density lipoprotein-related protein 1B (deleted in tumors) | Lrp1b | 311926 | 1,08 | down |
| 6528566 | 7238252 | 1469197 | low density lipoprotein-related protein 1B (deleted in tumors) | Lrp1b | 311926 | 1,01 | up   |
| 6530153 | 7238252 | 1469141 | low density lipoprotein-related protein 1B (deleted in tumors) | Lrp1b | 311926 | 1,62 | down |
| 6535280 | 7238252 | 1469167 | low density lipoprotein-related protein 1B (deleted in tumors) | Lrp1b | 311926 | 1,05 | up   |
| 6537743 | 7238252 | 1469221 | low density lipoprotein-related protein 1B (deleted in tumors) | Lrp1b | 311926 | 1,14 | down |
| 6557361 | 7238252 | 1469245 | low density lipoprotein-related protein 1B (deleted in tumors) | Lrp1b | 311926 | 1,03 | up   |
| 6576022 | 7238252 | 1469293 | low density lipoprotein-related protein 1B (deleted in tumors) | Lrp1b | 311926 | 1,46 | down |

|         |         |         |                                                                |       |        |      |      |
|---------|---------|---------|----------------------------------------------------------------|-------|--------|------|------|
| 6577648 | 7238252 | 1469087 | low density lipoprotein-related protein 1B (deleted in tumors) | Lrp1b | 311926 | 1,52 | up   |
| 6578946 | 7238252 | 1469206 | low density lipoprotein-related protein 1B (deleted in tumors) | Lrp1b | 311926 | 1,19 | down |
| 6581465 | 7238252 | 1469123 | low density lipoprotein-related protein 1B (deleted in tumors) | Lrp1b | 311926 | 1,01 | up   |
| 6603210 | 7238252 | 1469105 | low density lipoprotein-related protein 1B (deleted in tumors) | Lrp1b | 311926 | 1,02 | down |
| 6603280 | 7238252 | 1469103 | low density lipoprotein-related protein 1B (deleted in tumors) | Lrp1b | 311926 | 1,92 | down |
| 6611128 | 7238252 | 1469100 | low density lipoprotein-related protein 1B (deleted in tumors) | Lrp1b | 311926 | 1,19 | down |
| 6611435 | 7238252 | 1469224 | low density lipoprotein-related protein 1B (deleted in tumors) | Lrp1b | 311926 | 1,05 | down |
| 6615822 | 7238252 | 1469108 | low density lipoprotein-related protein 1B (deleted in tumors) | Lrp1b | 311926 | 1,06 | down |
| 6617790 | 7238252 | 1469098 | low density lipoprotein-related protein 1B (deleted in tumors) | Lrp1b | 311926 | 1,33 | down |
| 6619401 | 7238252 | 1469120 | low density lipoprotein-related protein 1B (deleted in tumors) | Lrp1b | 311926 | 1,09 | down |
| 6645923 | 7238252 | 1469092 | low density lipoprotein-related protein 1B (deleted in tumors) | Lrp1b | 311926 | 1,00 | up   |
| 6659588 | 7238252 | 1469113 | low density lipoprotein-related protein 1B (deleted in tumors) | Lrp1b | 311926 | 1,09 | down |
| 6673221 | 7238252 | 1469088 | low density lipoprotein-related protein 1B (deleted in tumors) | Lrp1b | 311926 | 1,14 | up   |
| 6697158 | 7238252 | 1469271 | low density lipoprotein-related protein 1B (deleted in tumors) | Lrp1b | 311926 | 1,01 | down |
| 6699133 | 7238252 | 1469202 | low density lipoprotein-related protein 1B (deleted in tumors) | Lrp1b | 311926 | 1,39 | up   |
| 6710672 | 7238252 | 1469140 | low density lipoprotein-related protein 1B (deleted in tumors) | Lrp1b | 311926 | 1,02 | down |
| 6714724 | 7238252 | 1469132 | low density lipoprotein-related protein 1B (deleted in tumors) | Lrp1b | 311926 | 1,26 | down |
| 6719285 | 7238252 | 1469173 | low density lipoprotein-related protein 1B (deleted in tumors) | Lrp1b | 311926 | 2,18 | down |
| 6740420 | 7238252 | 1469126 | low density lipoprotein-related protein 1B (deleted in tumors) | Lrp1b | 311926 | 1,23 | down |
| 5621906 | 7239931 | 1473742 | low density lipoprotein-related protein 2                      | Lrp2  | 29216  | 1,07 | down |
| 5628401 | 7239931 | 1473701 | low density lipoprotein-related protein 2                      | Lrp2  | 29216  | 1,14 | up   |
| 5631106 | 7239931 | 1473724 | low density lipoprotein-related protein 2                      | Lrp2  | 29216  | 1,11 | down |
| 5639900 | 7239931 | 1473727 | low density lipoprotein-related protein 2                      | Lrp2  | 29216  | 1,09 | down |
| 5643295 | 7239931 | 1473734 | low density lipoprotein-related protein 2                      | Lrp2  | 29216  | 1,40 | down |
| 5658142 | 7239931 | 1473716 | low density lipoprotein-related protein 2                      | Lrp2  | 29216  | 1,38 | up   |
| 5660345 | 7239931 | 1473738 | low density lipoprotein-related protein 2                      | Lrp2  | 29216  | 1,84 | up   |
| 5663249 | 7239931 | 1473741 | low density lipoprotein-related protein 2                      | Lrp2  | 29216  | 1,08 | up   |
| 5672467 | 7239931 | 1473730 | low density lipoprotein-related protein 2                      | Lrp2  | 29216  | 1,02 | down |
| 5677014 | 7239931 | 1473722 | low density lipoprotein-related protein 2                      | Lrp2  | 29216  | 1,77 | up   |
| 5677981 | 7239931 | 1473748 | low density lipoprotein-related protein 2                      | Lrp2  | 29216  | 1,04 | down |
| 5705993 | 7239931 | 1473721 | low density lipoprotein-related protein 2                      | Lrp2  | 29216  | 1,04 | up   |
| 5706840 | 7239931 | 1473731 | low density lipoprotein-related protein 2                      | Lrp2  | 29216  | 1,06 | up   |
| 5707193 | 7239931 | 1473756 | low density lipoprotein-related protein 2                      | Lrp2  | 29216  | 1,05 | down |
| 5738936 | 7239931 | 1473714 | low density lipoprotein-related protein 2                      | Lrp2  | 29216  | 1,61 | down |
| 5739892 | 7239931 | 1473765 | low density lipoprotein-related protein 2                      | Lrp2  | 29216  | 1,04 | up   |
| 5761340 | 7239931 | 1473723 | low density lipoprotein-related protein 2                      | Lrp2  | 29216  | 2,04 | down |
| 5815572 | 7239931 | 1473764 | low density lipoprotein-related protein 2                      | Lrp2  | 29216  | 1,43 | down |
| 5822630 | 7239931 | 1473771 | low density lipoprotein-related protein 2                      | Lrp2  | 29216  | 1,27 | up   |
| 5826884 | 7239931 | 1473699 | low density lipoprotein-related protein 2                      | Lrp2  | 29216  | 1,18 | down |
| 5844747 | 7239931 | 1473740 | low density lipoprotein-related protein 2                      | Lrp2  | 29216  | 1,07 | up   |
| 5854092 | 7239931 | 1473713 | low density lipoprotein-related protein 2                      | Lrp2  | 29216  | 1,06 | up   |
| 5875923 | 7239931 | 1473711 | low density lipoprotein-related protein 2                      | Lrp2  | 29216  | 1,11 | up   |
| 5883842 | 7239931 | 1473694 | low density lipoprotein-related protein 2                      | Lrp2  | 29216  | 1,00 | down |
| 5908073 | 7239931 | 1473739 | low density lipoprotein-related protein 2                      | Lrp2  | 29216  | 1,52 | down |
| 5917690 | 7239931 | 1473749 | low density lipoprotein-related protein 2                      | Lrp2  | 29216  | 1,65 | down |
| 5923323 | 7239931 | 1473746 | low density lipoprotein-related protein 2                      | Lrp2  | 29216  | 1,05 | down |
| 5927500 | 7239931 | 1473718 | low density lipoprotein-related protein 2                      | Lrp2  | 29216  | 1,38 | up   |
| 5947094 | 7239931 | 1473772 | low density lipoprotein-related protein 2                      | Lrp2  | 29216  | 1,09 | down |
| 5962931 | 7239931 | 1473754 | low density lipoprotein-related protein 2                      | Lrp2  | 29216  | 1,10 | up   |
| 5965362 | 7239931 | 1473735 | low density lipoprotein-related protein 2                      | Lrp2  | 29216  | 1,02 | up   |
| 5981549 | 7239931 | 1473744 | low density lipoprotein-related protein 2                      | Lrp2  | 29216  | 1,75 | up   |
| 5987852 | 7239931 | 1473747 | low density lipoprotein-related protein 2                      | Lrp2  | 29216  | 1,67 | down |
| 5991727 | 7239931 | 1473743 | low density lipoprotein-related protein 2                      | Lrp2  | 29216  | 1,09 | up   |
| 6009678 | 7239931 | 1473706 | low density lipoprotein-related protein 2                      | Lrp2  | 29216  | 1,14 | down |
| 6013783 | 7239931 | 1473712 | low density lipoprotein-related protein 2                      | Lrp2  | 29216  | 1,26 | down |
| 6015510 | 7239931 | 1473710 | low density lipoprotein-related protein 2                      | Lrp2  | 29216  | 1,02 | down |

|         |         |         |                                                               |      |        |      |      |
|---------|---------|---------|---------------------------------------------------------------|------|--------|------|------|
| 6041450 | 7239931 | 1473757 | low density lipoprotein-related protein 2                     | Lrp2 | 29216  | 1,72 | down |
| 6043260 | 7239931 | 1473725 | low density lipoprotein-related protein 2                     | Lrp2 | 29216  | 1,04 | up   |
| 6053355 | 7239931 | 1473745 | low density lipoprotein-related protein 2                     | Lrp2 | 29216  | 1,33 | down |
| 6091770 | 7239931 | 1473705 | low density lipoprotein-related protein 2                     | Lrp2 | 29216  | 1,77 | up   |
| 6101700 | 7239931 | 1473761 | low density lipoprotein-related protein 2                     | Lrp2 | 29216  | 1,28 | up   |
| 6121187 | 7239931 | 1473769 | low density lipoprotein-related protein 2                     | Lrp2 | 29216  | 1,08 | up   |
| 6140718 | 7239931 | 1473726 | low density lipoprotein-related protein 2                     | Lrp2 | 29216  | 1,10 | up   |
| 6176005 | 7239931 | 1473759 | low density lipoprotein-related protein 2                     | Lrp2 | 29216  | 1,02 | up   |
| 6233367 | 7239931 | 1473767 | low density lipoprotein-related protein 2                     | Lrp2 | 29216  | 1,26 | up   |
| 6239732 | 7239931 | 1473695 | low density lipoprotein-related protein 2                     | Lrp2 | 29216  | 1,10 | down |
| 6240511 | 7239931 | 1473744 | low density lipoprotein-related protein 2                     | Lrp2 | 29216  | 1,06 | up   |
| 6243501 | 7239931 | 1473697 | low density lipoprotein-related protein 2                     | Lrp2 | 29216  | 1,02 | down |
| 6253679 | 7239931 | 1473752 | low density lipoprotein-related protein 2                     | Lrp2 | 29216  | 1,54 | up   |
| 6254289 | 7239931 | 1473730 | low density lipoprotein-related protein 2                     | Lrp2 | 29216  | 1,57 | down |
| 6262945 | 7239931 | 1473728 | low density lipoprotein-related protein 2                     | Lrp2 | 29216  | 1,01 | down |
| 6263796 | 7239931 | 1473760 | low density lipoprotein-related protein 2                     | Lrp2 | 29216  | 1,06 | down |
| 6270960 | 7239931 | 1473696 | low density lipoprotein-related protein 2                     | Lrp2 | 29216  | 1,26 | down |
| 6274446 | 7239931 | 1473702 | low density lipoprotein-related protein 2                     | Lrp2 | 29216  | 1,06 | up   |
| 6275500 | 7239931 | 1473733 | low density lipoprotein-related protein 2                     | Lrp2 | 29216  | 1,16 | down |
| 6279169 | 7239931 | 1473735 | low density lipoprotein-related protein 2                     | Lrp2 | 29216  | 1,39 | up   |
| 6289005 | 7239931 | 1473762 | low density lipoprotein-related protein 2                     | Lrp2 | 29216  | 1,15 | up   |
| 6294882 | 7239931 | 1473702 | low density lipoprotein-related protein 2                     | Lrp2 | 29216  | 1,37 | down |
| 6319157 | 7239931 | 1473753 | low density lipoprotein-related protein 2                     | Lrp2 | 29216  | 1,84 | up   |
| 6329334 | 7239931 | 1473729 | low density lipoprotein-related protein 2                     | Lrp2 | 29216  | 1,06 | down |
| 6332045 | 7239931 | 1473743 | low density lipoprotein-related protein 2                     | Lrp2 | 29216  | 1,04 | up   |
| 6367592 | 7239931 | 1473758 | low density lipoprotein-related protein 2                     | Lrp2 | 29216  | 1,18 | down |
| 6368794 | 7239931 | 1473700 | low density lipoprotein-related protein 2                     | Lrp2 | 29216  | 1,16 | up   |
| 6374804 | 7239931 | 1473755 | low density lipoprotein-related protein 2                     | Lrp2 | 29216  | 1,20 | down |
| 6378896 | 7239931 | 1473720 | low density lipoprotein-related protein 2                     | Lrp2 | 29216  | 1,14 | up   |
| 6381142 | 7239931 | 1473715 | low density lipoprotein-related protein 2                     | Lrp2 | 29216  | 1,03 | down |
| 6407608 | 7239931 | 1473773 | low density lipoprotein-related protein 2                     | Lrp2 | 29216  | 1,07 | up   |
| 6412044 | 7239931 | 1473737 | low density lipoprotein-related protein 2                     | Lrp2 | 29216  | 1,19 | down |
| 6413212 | 7239931 | 1473745 | low density lipoprotein-related protein 2                     | Lrp2 | 29216  | 1,05 | down |
| 6415768 | 7239931 | 1473719 | low density lipoprotein-related protein 2                     | Lrp2 | 29216  | 1,17 | up   |
| 6433356 | 7239931 | 1473768 | low density lipoprotein-related protein 2                     | Lrp2 | 29216  | 1,04 | up   |
| 6434308 | 7239931 | 1473763 | low density lipoprotein-related protein 2                     | Lrp2 | 29216  | 1,14 | up   |
| 6527446 | 7239931 | 1473745 | low density lipoprotein-related protein 2                     | Lrp2 | 29216  | 1,78 | down |
| 6541243 | 7239931 | 1473725 | low density lipoprotein-related protein 2                     | Lrp2 | 29216  | 1,53 | up   |
| 6545473 | 7239931 | 1473751 | low density lipoprotein-related protein 2                     | Lrp2 | 29216  | 1,64 | down |
| 6596213 | 7239931 | 1473707 | low density lipoprotein-related protein 2                     | Lrp2 | 29216  | 1,32 | up   |
| 6597835 | 7239931 | 1473717 | low density lipoprotein-related protein 2                     | Lrp2 | 29216  | 1,11 | down |
| 6606469 | 7239931 | 1473726 | low density lipoprotein-related protein 2                     | Lrp2 | 29216  | 1,47 | down |
| 6607847 | 7239931 | 1473703 | low density lipoprotein-related protein 2                     | Lrp2 | 29216  | 1,00 | up   |
| 6611172 | 7239931 | 1473732 | low density lipoprotein-related protein 2                     | Lrp2 | 29216  | 1,33 | up   |
| 6621177 | 7239931 | 1473766 | low density lipoprotein-related protein 2                     | Lrp2 | 29216  | 1,52 | up   |
| 6653675 | 7239931 | 1473750 | low density lipoprotein-related protein 2                     | Lrp2 | 29216  | 1,11 | up   |
| 6656337 | 7239931 | 1473738 | low density lipoprotein-related protein 2                     | Lrp2 | 29216  | 2,04 | down |
| 6679710 | 7239931 | 1473736 | low density lipoprotein-related protein 2                     | Lrp2 | 29216  | 1,43 | down |
| 6682681 | 7239931 | 1473698 | low density lipoprotein-related protein 2                     | Lrp2 | 29216  | 1,36 | up   |
| 6700189 | 7239931 | 1473770 | low density lipoprotein-related protein 2                     | Lrp2 | 29216  | 1,01 | down |
| 6702883 | 7239931 | 1473709 | low density lipoprotein-related protein 2                     | Lrp2 | 29216  | 1,29 | up   |
| 6704658 | 7239931 | 1473704 | low density lipoprotein-related protein 2                     | Lrp2 | 29216  | 1,13 | up   |
| 6717046 | 7239931 | 1473708 | low density lipoprotein-related protein 2                     | Lrp2 | 29216  | 1,15 | up   |
| 6720727 | 7239931 | 1473773 | low density lipoprotein-related protein 2                     | Lrp2 | 29216  | 1,29 | up   |
| 5650240 | 7152726 | 1257083 | LSM1 homolog, U6 small nuclear RNA associated (S. cerevisiae) | Lsm1 | 364624 | 1,12 | up   |
| 5730903 | 7152726 | 1257084 | LSM1 homolog, U6 small nuclear RNA associated (S. cerevisiae) | Lsm1 | 364624 | 1,43 | down |

|         |         |         |                                                               |        |        |      |      |
|---------|---------|---------|---------------------------------------------------------------|--------|--------|------|------|
| 6079717 | 7152726 | 1257081 | LSM1 homolog, U6 small nuclear RNA associated (S. cerevisiae) | Lsm1   | 364624 | 1,29 | up   |
| 6087219 | 7152726 | 1257082 | LSM1 homolog, U6 small nuclear RNA associated (S. cerevisiae) | Lsm1   | 364624 | 1,21 | up   |
| 6093112 | 7152726 | 1257084 | LSM1 homolog, U6 small nuclear RNA associated (S. cerevisiae) | Lsm1   | 364624 | 1,72 | up   |
| 6107350 | 7152726 | 1257081 | LSM1 homolog, U6 small nuclear RNA associated (S. cerevisiae) | Lsm1   | 364624 | 1,69 | up   |
| 6331965 | 7152726 | 1257084 | LSM1 homolog, U6 small nuclear RNA associated (S. cerevisiae) | Lsm1   | 364624 | 2,03 | down |
| 5637818 | 7050065 | 1009554 | LSM14A, SCD6 homolog A (S. cerevisiae)                        | Lsm14a | 361554 | 1,09 | up   |
| 5721021 | 7050065 | 1009557 | LSM14A, SCD6 homolog A (S. cerevisiae)                        | Lsm14a | 361554 | 1,36 | down |
| 5732487 | 7050065 | 1009558 | LSM14A, SCD6 homolog A (S. cerevisiae)                        | Lsm14a | 361554 | 1,18 | up   |
| 5745273 | 7050065 | 1009553 | LSM14A, SCD6 homolog A (S. cerevisiae)                        | Lsm14a | 361554 | 1,31 | up   |
| 5760373 | 7050065 | 1009561 | LSM14A, SCD6 homolog A (S. cerevisiae)                        | Lsm14a | 361554 | 1,06 | up   |
| 5787578 | 7050065 | 1009558 | LSM14A, SCD6 homolog A (S. cerevisiae)                        | Lsm14a | 361554 | 1,06 | down |
| 5889425 | 7050065 | 1009565 | LSM14A, SCD6 homolog A (S. cerevisiae)                        | Lsm14a | 361554 | 1,06 | up   |
| 5931200 | 7050065 | 1009557 | LSM14A, SCD6 homolog A (S. cerevisiae)                        | Lsm14a | 361554 | 1,19 | up   |
| 6221685 | 7050065 | 1009549 | LSM14A, SCD6 homolog A (S. cerevisiae)                        | Lsm14a | 361554 | 1,29 | down |
| 6265442 | 7050065 | 1009559 | LSM14A, SCD6 homolog A (S. cerevisiae)                        | Lsm14a | 361554 | 1,14 | up   |
| 6526596 | 7050065 | 1009555 | LSM14A, SCD6 homolog A (S. cerevisiae)                        | Lsm14a | 361554 | 1,05 | up   |
| 6577843 | 7050065 | 1009556 | LSM14A, SCD6 homolog A (S. cerevisiae)                        | Lsm14a | 361554 | 1,05 | down |
| 6633434 | 7050065 | 1009553 | LSM14A, SCD6 homolog A (S. cerevisiae)                        | Lsm14a | 361554 | 1,23 | up   |
| 6728575 | 7050065 | 1009555 | LSM14A, SCD6 homolog A (S. cerevisiae)                        | Lsm14a | 361554 | 2,61 | down |
| 6737004 | 7050065 | 1009561 | LSM14A, SCD6 homolog A (S. cerevisiae)                        | Lsm14a | 361554 | 1,07 | up   |
| 5644958 | 7361037 | 1772245 | lung-inducible neuralized-related C3HC4 RING domain protein   | Linc   | 316326 | 1,65 | up   |
| 5723708 | 7361037 | 1772245 | lung-inducible neuralized-related C3HC4 RING domain protein   | Linc   | 316326 | 2,04 | up   |
| 5817475 | 7361037 | 1772247 | lung-inducible neuralized-related C3HC4 RING domain protein   | Linc   | 316326 | 1,14 | down |
| 6050269 | 7361037 | 1772244 | lung-inducible neuralized-related C3HC4 RING domain protein   | Linc   | 316326 | 1,25 | up   |
| 6301953 | 7361037 | 1772246 | lung-inducible neuralized-related C3HC4 RING domain protein   | Linc   | 316326 | 1,12 | up   |
| 6473019 | 7361037 | 1772248 | lung-inducible neuralized-related C3HC4 RING domain protein   | Linc   | 316326 | 2,71 | down |
| 6694026 | 7361037 | 1772248 | lung-inducible neuralized-related C3HC4 RING domain protein   | Linc   | 316326 | 2,71 | down |
| 6708226 | 7361037 | 1772248 | lung-inducible neuralized-related C3HC4 RING domain protein   | Linc   | 316326 | 3,82 | down |
| 5674995 | 7031504 | 963947  | luteinizing hormone beta                                      | Lhb    | 25329  | 1,02 | up   |
| 5675323 | 7031504 | 963945  | luteinizing hormone beta                                      | Lhb    | 25329  | 1,03 | up   |
| 5835637 | 7031504 | 963943  | luteinizing hormone beta                                      | Lhb    | 25329  | 2,04 | down |
| 5955127 | 7031504 | 963941  | luteinizing hormone beta                                      | Lhb    | 25329  | 1,13 | down |
| 6037637 | 7031504 | 963940  | luteinizing hormone beta                                      | Lhb    | 25329  | 1,34 | up   |
| 6072352 | 7031504 | 963946  | luteinizing hormone beta                                      | Lhb    | 25329  | 1,11 | down |
| 6384126 | 7031504 | 963942  | luteinizing hormone beta                                      | Lhb    | 25329  | 1,04 | up   |
| 6626447 | 7031504 | 963948  | luteinizing hormone beta                                      | Lhb    | 25329  | 1,01 | up   |
| 6649100 | 7031504 | 963948  | luteinizing hormone beta                                      | Lhb    | 25329  | 1,43 | down |
| 6686386 | 7031504 | 963949  | luteinizing hormone beta                                      | Lhb    | 25329  | 1,11 | down |
| 6716316 | 7031504 | 963944  | luteinizing hormone beta                                      | Lhb    | 25329  | 1,15 | up   |
| 5784258 | 7227313 | 1440689 | LY6/PLAUR domain containing 6                                 | Lypd6  | 679564 | 1,18 | up   |
| 5819750 | 7227313 | 1440662 | LY6/PLAUR domain containing 6                                 | Lypd6  | 679564 | 1,19 | down |
| 5882415 | 7227313 | 1440684 | LY6/PLAUR domain containing 6                                 | Lypd6  | 679564 | 1,16 | down |
| 6517092 | 7227313 | 1440679 | LY6/PLAUR domain containing 6                                 | Lypd6  | 679564 | 1,10 | up   |
| 6528480 | 7227313 | 1440691 | LY6/PLAUR domain containing 6                                 | Lypd6  | 679564 | 1,45 | up   |
| 6700295 | 7227313 | 1440689 | LY6/PLAUR domain containing 6                                 | Lypd6  | 679564 | 1,08 | up   |
| 5654508 | 7318105 | 1667998 | lymphocyte antigen 6 complex, locus E                         | Ly6e   | 362934 | 2,96 | down |
| 5762941 | 7318105 | 1667998 | lymphocyte antigen 6 complex, locus E                         | Ly6e   | 362934 | 2,16 | down |
| 5802370 | 7318105 | 1668000 | lymphocyte antigen 6 complex, locus E                         | Ly6e   | 362934 | 1,02 | up   |
| 5960602 | 7318105 | 1668001 | lymphocyte antigen 6 complex, locus E                         | Ly6e   | 362934 | 1,45 | up   |
| 5966915 | 7318105 | 1668002 | lymphocyte antigen 6 complex, locus E                         | Ly6e   | 362934 | 1,21 | up   |
| 5984138 | 7318105 | 1668002 | lymphocyte antigen 6 complex, locus E                         | Ly6e   | 362934 | 1,31 | up   |
| 6365610 | 7318105 | 1667999 | lymphocyte antigen 6 complex, locus E                         | Ly6e   | 362934 | 1,49 | down |
| 6614054 | 7318105 | 1667999 | lymphocyte antigen 6 complex, locus E                         | Ly6e   | 362934 | 1,24 | down |
| 5652083 | 7133474 | 1209895 | lymphocyte cytosolic protein 1                                | Lcp1   | 306071 | 1,75 | up   |
| 5802081 | 7133474 | 1209884 | lymphocyte cytosolic protein 1                                | Lcp1   | 306071 | 1,31 | down |
| 5887999 | 7133474 | 1209885 | lymphocyte cytosolic protein 1                                | Lcp1   | 306071 | 1,87 | down |

|         |         |         |                                |      |        |      |      |
|---------|---------|---------|--------------------------------|------|--------|------|------|
| 5902768 | 7133474 | 1209883 | lymphocyte cytosolic protein 1 | Lcp1 | 306071 | 1,02 | up   |
| 5905385 | 7133474 | 1209885 | lymphocyte cytosolic protein 1 | Lcp1 | 306071 | 2,17 | down |
| 6075979 | 7133474 | 1209887 | lymphocyte cytosolic protein 1 | Lcp1 | 306071 | 1,12 | up   |
| 6112328 | 7133474 | 1209899 | lymphocyte cytosolic protein 1 | Lcp1 | 306071 | 5,05 | down |
| 6185152 | 7133474 | 1209899 | lymphocyte cytosolic protein 1 | Lcp1 | 306071 | 1,14 | up   |
| 6206278 | 7133474 | 1209889 | lymphocyte cytosolic protein 1 | Lcp1 | 306071 | 1,37 | up   |
| 6232466 | 7133474 | 1209898 | lymphocyte cytosolic protein 1 | Lcp1 | 306071 | 2,38 | down |
| 6315499 | 7133474 | 1209888 | lymphocyte cytosolic protein 1 | Lcp1 | 306071 | 1,31 | up   |
| 6351118 | 7133474 | 1209893 | lymphocyte cytosolic protein 1 | Lcp1 | 306071 | 1,14 | down |
| 6409005 | 7133474 | 1209899 | lymphocyte cytosolic protein 1 | Lcp1 | 306071 | 1,58 | down |
| 6432854 | 7133474 | 1209890 | lymphocyte cytosolic protein 1 | Lcp1 | 306071 | 1,53 | down |
| 6453663 | 7133474 | 1209894 | lymphocyte cytosolic protein 1 | Lcp1 | 306071 | 1,13 | up   |
| 6469278 | 7133474 | 1209892 | lymphocyte cytosolic protein 1 | Lcp1 | 306071 | 1,07 | down |
| 6502996 | 7133474 | 1209899 | lymphocyte cytosolic protein 1 | Lcp1 | 306071 | 1,93 | down |
| 6538703 | 7133474 | 1209891 | lymphocyte cytosolic protein 1 | Lcp1 | 306071 | 1,08 | down |
| 6574507 | 7133474 | 1209886 | lymphocyte cytosolic protein 1 | Lcp1 | 306071 | 1,43 | up   |
| 6576702 | 7133474 | 1209897 | lymphocyte cytosolic protein 1 | Lcp1 | 306071 | 1,27 | down |
| 6578651 | 7133474 | 1209896 | lymphocyte cytosolic protein 1 | Lcp1 | 306071 | 1,51 | up   |
| 6610099 | 7133474 | 1209898 | lymphocyte cytosolic protein 1 | Lcp1 | 306071 | 1,25 | down |
| 5621228 | 7066185 | 1046521 | lymphocyte cytosolic protein 2 | Lcp2 | 155918 | 2,26 | down |
| 5725168 | 7066185 | 1046528 | lymphocyte cytosolic protein 2 | Lcp2 | 155918 | 1,32 | down |
| 5767074 | 7066185 | 1046516 | lymphocyte cytosolic protein 2 | Lcp2 | 155918 | 1,13 | up   |
| 5780965 | 7066185 | 1046527 | lymphocyte cytosolic protein 2 | Lcp2 | 155918 | 1,31 | down |
| 5801380 | 7066185 | 1046524 | lymphocyte cytosolic protein 2 | Lcp2 | 155918 | 1,04 | down |
| 5839280 | 7066185 | 1046526 | lymphocyte cytosolic protein 2 | Lcp2 | 155918 | 1,03 | up   |
| 5847042 | 7066185 | 1046530 | lymphocyte cytosolic protein 2 | Lcp2 | 155918 | 1,24 | down |
| 5852754 | 7066185 | 1046529 | lymphocyte cytosolic protein 2 | Lcp2 | 155918 | 1,03 | up   |
| 5930099 | 7066185 | 1046523 | lymphocyte cytosolic protein 2 | Lcp2 | 155918 | 1,07 | down |
| 6162743 | 7066185 | 1046531 | lymphocyte cytosolic protein 2 | Lcp2 | 155918 | 1,04 | up   |
| 6187993 | 7066185 | 1046522 | lymphocyte cytosolic protein 2 | Lcp2 | 155918 | 1,52 | down |
| 6299575 | 7066185 | 1046525 | lymphocyte cytosolic protein 2 | Lcp2 | 155918 | 1,60 | down |
| 6445757 | 7066185 | 1046517 | lymphocyte cytosolic protein 2 | Lcp2 | 155918 | 1,07 | up   |
| 6450781 | 7066185 | 1046518 | lymphocyte cytosolic protein 2 | Lcp2 | 155918 | 1,18 | up   |
| 6515576 | 7066185 | 1046520 | lymphocyte cytosolic protein 2 | Lcp2 | 155918 | 1,29 | up   |
| 6680781 | 7066185 | 1046515 | lymphocyte cytosolic protein 2 | Lcp2 | 155918 | 1,11 | up   |
| 6695862 | 7066185 | 1046519 | lymphocyte cytosolic protein 2 | Lcp2 | 155918 | 1,21 | down |
| 6733468 | 7066185 | 1046514 | lymphocyte cytosolic protein 2 | Lcp2 | 155918 | 1,43 | up   |
| 5627460 | 7269583 | 1546128 | lymphocyte-activation gene 3   | Lag3 | 297596 | 1,53 | down |
| 5687888 | 7269583 | 1546131 | lymphocyte-activation gene 3   | Lag3 | 297596 | 1,05 | down |
| 5731080 | 7269583 | 1546125 | lymphocyte-activation gene 3   | Lag3 | 297596 | 1,25 | up   |
| 5846743 | 7269583 | 1546130 | lymphocyte-activation gene 3   | Lag3 | 297596 | 2,60 | down |
| 5908898 | 7269583 | 1546126 | lymphocyte-activation gene 3   | Lag3 | 297596 | 1,04 | down |
| 5992665 | 7269583 | 1546129 | lymphocyte-activation gene 3   | Lag3 | 297596 | 1,08 | up   |
| 6138487 | 7269583 | 1546128 | lymphocyte-activation gene 3   | Lag3 | 297596 | 1,27 | down |
| 6142236 | 7269583 | 1546126 | lymphocyte-activation gene 3   | Lag3 | 297596 | 1,51 | up   |
| 6154556 | 7269583 | 1546129 | lymphocyte-activation gene 3   | Lag3 | 297596 | 1,09 | up   |
| 6159061 | 7269583 | 1546132 | lymphocyte-activation gene 3   | Lag3 | 297596 | 1,03 | up   |
| 6214499 | 7269583 | 1546124 | lymphocyte-activation gene 3   | Lag3 | 297596 | 2,04 | down |
| 6251805 | 7269583 | 1546131 | lymphocyte-activation gene 3   | Lag3 | 297596 | 1,20 | up   |
| 6351113 | 7269583 | 1546124 | lymphocyte-activation gene 3   | Lag3 | 297596 | 1,33 | up   |
| 6433160 | 7269583 | 1546127 | lymphocyte-activation gene 3   | Lag3 | 297596 | 1,80 | up   |
| 5665798 | 7038610 | 982083  | lymphocyte-specific protein 1  | Lsp1 | 361680 | 1,01 | up   |
| 5677836 | 7038610 | 982087  | lymphocyte-specific protein 1  | Lsp1 | 361680 | 1,02 | down |
| 5682815 | 7038610 | 982092  | lymphocyte-specific protein 1  | Lsp1 | 361680 | 1,10 | up   |
| 5731104 | 7038610 | 982082  | lymphocyte-specific protein 1  | Lsp1 | 361680 | 1,06 | up   |
| 5968300 | 7038610 | 982082  | lymphocyte-specific protein 1  | Lsp1 | 361680 | 1,02 | up   |



|         |         |         |                                                           |           |        |      |      |
|---------|---------|---------|-----------------------------------------------------------|-----------|--------|------|------|
| 5983889 | 7038610 | 982081  | lymphocyte-specific protein 1                             | Lsp1      | 361680 | 1,01 | up   |
| 6024457 | 7038610 | 982085  | lymphocyte-specific protein 1                             | Lsp1      | 361680 | 1,17 | up   |
| 6247052 | 7038610 | 982071  | lymphocyte-specific protein 1                             | Lsp1      | 361680 | 1,22 | down |
| 6447326 | 7038610 | 982086  | lymphocyte-specific protein 1                             | Lsp1      | 361680 | 1,24 | up   |
| 6609083 | 7038610 | 982088  | lymphocyte-specific protein 1                             | Lsp1      | 361680 | 1,65 | down |
| 6631138 | 7038610 | 982089  | lymphocyte-specific protein 1                             | Lsp1      | 361680 | 1,34 | down |
| 6635669 | 7038610 | 982071  | lymphocyte-specific protein 1                             | Lsp1      | 361680 | 1,35 | up   |
| 6648474 | 7038610 | 982084  | lymphocyte-specific protein 1                             | Lsp1      | 361680 | 1,45 | up   |
| 5620873 | 7220595 | 1424382 | lymphotoxin beta (TNF superfamily, member 3)              | Ltb       | 361795 | 1,19 | down |
| 5793016 | 7220595 | 1424381 | lymphotoxin beta (TNF superfamily, member 3)              | Ltb       | 361795 | 1,10 | down |
| 5974639 | 7220595 | 1424382 | lymphotoxin beta (TNF superfamily, member 3)              | Ltb       | 361795 | 4,10 | down |
| 6104205 | 7220595 | 1424379 | lymphotoxin beta (TNF superfamily, member 3)              | Ltb       | 361795 | 7,68 | up   |
| 6192648 | 7220595 | 1424380 | lymphotoxin beta (TNF superfamily, member 3)              | Ltb       | 361795 | 2,79 | up   |
| 6398560 | 7220595 | 1424382 | lymphotoxin beta (TNF superfamily, member 3)              | Ltb       | 361795 | 3,23 | down |
| 6596502 | 7220595 | 1424381 | lymphotoxin beta (TNF superfamily, member 3)              | Ltb       | 361795 | 2,17 | up   |
| 5713025 | 7338101 | 1715195 | LysM, putative peptidoglycan-binding, domain containing 2 | Lysmd2    | 300839 | 1,17 | up   |
| 5887965 | 7338101 | 1715196 | LysM, putative peptidoglycan-binding, domain containing 2 | Lysmd2    | 300839 | 1,16 | down |
| 6702080 | 7338101 | 1715192 | LysM, putative peptidoglycan-binding, domain containing 2 | Lysmd2    | 300839 | 1,13 | down |
| 6734805 | 7338101 | 1715196 | LysM, putative peptidoglycan-binding, domain containing 2 | Lysmd2    | 300839 | 1,55 | up   |
| 5801631 | 7183182 | 1333552 | lysophosphatidylcholine acyltransferase 2                 | Lpcat2    | 307713 | 2,11 | up   |
| 5719286 | 7302020 | 1627007 | lysophospholipase                                         | LOC246266 | 246266 | 1,65 | down |
| 5725283 | 7302020 | 1627004 | lysophospholipase                                         | LOC246266 | 246266 | 1,19 | up   |
| 5841907 | 7302020 | 1627005 | lysophospholipase                                         | LOC246266 | 246266 | 1,01 | down |
| 5888845 | 7302020 | 1627008 | lysophospholipase                                         | LOC246266 | 246266 | 1,17 | down |
| 5902989 | 7302020 | 1626998 | lysophospholipase                                         | LOC246266 | 246266 | 1,05 | down |
| 5965745 | 7302020 | 1627003 | lysophospholipase                                         | LOC246266 | 246266 | 2,11 | up   |
| 6052111 | 7302020 | 1627012 | lysophospholipase                                         | LOC246266 | 246266 | 1,14 | down |
| 6062694 | 7302020 | 1627001 | lysophospholipase                                         | LOC246266 | 246266 | 1,11 | down |
| 6074920 | 7302020 | 1627011 | lysophospholipase                                         | LOC246266 | 246266 | 2,38 | up   |
| 6084801 | 7302020 | 1627010 | lysophospholipase                                         | LOC246266 | 246266 | 1,39 | down |
| 6237136 | 7302020 | 1627002 | lysophospholipase                                         | LOC246266 | 246266 | 1,11 | down |
| 6292967 | 7302020 | 1627009 | lysophospholipase                                         | LOC246266 | 246266 | 1,08 | down |
| 6323672 | 7302020 | 1627013 | lysophospholipase                                         | LOC246266 | 246266 | 1,09 | down |
| 6419310 | 7302020 | 1626999 | lysophospholipase                                         | LOC246266 | 246266 | 1,09 | up   |
| 6505541 | 7302020 | 1626998 | lysophospholipase                                         | LOC246266 | 246266 | 1,33 | down |
| 6621492 | 7302020 | 1627006 | lysophospholipase                                         | LOC246266 | 246266 | 1,05 | up   |
| 6711793 | 7302020 | 1627000 | lysophospholipase                                         | LOC246266 | 246266 | 1,42 | down |
| 5652535 | 7283161 | 1580637 | lysophospholipase 1                                       | Lypla1    | 25514  | 4,87 | up   |
| 5685521 | 7283161 | 1580636 | lysophospholipase 1                                       | Lypla1    | 25514  | 1,14 | down |
| 5715875 | 7283161 | 1580634 | lysophospholipase 1                                       | Lypla1    | 25514  | 1,19 | up   |
| 5776072 | 7283161 | 1580635 | lysophospholipase 1                                       | Lypla1    | 25514  | 1,02 | down |
| 5862860 | 7283161 | 1580643 | lysophospholipase 1                                       | Lypla1    | 25514  | 1,13 | down |
| 5882469 | 7283161 | 1580643 | lysophospholipase 1                                       | Lypla1    | 25514  | 1,09 | down |
| 5997471 | 7283161 | 1580640 | lysophospholipase 1                                       | Lypla1    | 25514  | 1,05 | down |
| 5998638 | 7283161 | 1580638 | lysophospholipase 1                                       | Lypla1    | 25514  | 1,23 | up   |
| 6165568 | 7283161 | 1580634 | lysophospholipase 1                                       | Lypla1    | 25514  | 1,08 | up   |
| 6184800 | 7283161 | 1580642 | lysophospholipase 1                                       | Lypla1    | 25514  | 1,02 | up   |
| 6604407 | 7283161 | 1580634 | lysophospholipase 1                                       | Lypla1    | 25514  | 1,28 | down |
| 6640558 | 7283161 | 1580641 | lysophospholipase 1                                       | Lypla1    | 25514  | 2,23 | up   |
| 6720135 | 7283161 | 1580639 | lysophospholipase 1                                       | Lypla1    | 25514  | 1,17 | down |
| 5668251 | 7096886 | 1119489 | MAD1 mitotic arrest deficient-like 1 (yeast)              | Mad1l1    | 680006 | 1,06 | down |
| 5752880 | 7096886 | 1119468 | MAD1 mitotic arrest deficient-like 1 (yeast)              | Mad1l1    | 680006 | 2,08 | down |
| 5806426 | 7096886 | 1119404 | MAD1 mitotic arrest deficient-like 1 (yeast)              | Mad1l1    | 680006 | 1,01 | down |
| 5858471 | 7096886 | 1119455 | MAD1 mitotic arrest deficient-like 1 (yeast)              | Mad1l1    | 680006 | 1,04 | down |
| 5898669 | 7096886 | 1119445 | MAD1 mitotic arrest deficient-like 1 (yeast)              | Mad1l1    | 680006 | 1,28 | down |
| 5958089 | 7096886 | 1119402 | MAD1 mitotic arrest deficient-like 1 (yeast)              | Mad1l1    | 680006 | 1,35 | up   |

|         |         |         |                                                      |         |        |      |      |
|---------|---------|---------|------------------------------------------------------|---------|--------|------|------|
| 5975329 | 7096886 | 1119408 | MAD1 mitotic arrest deficient-like 1 (yeast)         | Mad111  | 680006 | 1,11 | down |
| 6031223 | 7096886 | 1119406 | MAD1 mitotic arrest deficient-like 1 (yeast)         | Mad111  | 680006 | 1,18 | down |
| 6031320 | 7096886 | 1119415 | MAD1 mitotic arrest deficient-like 1 (yeast)         | Mad111  | 680006 | 1,88 | down |
| 6139801 | 7096886 | 1119405 | MAD1 mitotic arrest deficient-like 1 (yeast)         | Mad111  | 680006 | 1,22 | down |
| 6177214 | 7096886 | 1119409 | MAD1 mitotic arrest deficient-like 1 (yeast)         | Mad111  | 680006 | 1,32 | up   |
| 6236011 | 7096886 | 1119437 | MAD1 mitotic arrest deficient-like 1 (yeast)         | Mad111  | 680006 | 1,06 | up   |
| 6295621 | 7096886 | 1119401 | MAD1 mitotic arrest deficient-like 1 (yeast)         | Mad111  | 680006 | 1,22 | down |
| 6326962 | 7096886 | 1119449 | MAD1 mitotic arrest deficient-like 1 (yeast)         | Mad111  | 680006 | 1,23 | down |
| 6329280 | 7096886 | 1119463 | MAD1 mitotic arrest deficient-like 1 (yeast)         | Mad111  | 680006 | 1,05 | up   |
| 6409247 | 7096886 | 1119402 | MAD1 mitotic arrest deficient-like 1 (yeast)         | Mad111  | 680006 | 1,07 | up   |
| 6519328 | 7096886 | 1119423 | MAD1 mitotic arrest deficient-like 1 (yeast)         | Mad111  | 680006 | 1,05 | up   |
| 6577899 | 7096886 | 1119489 | MAD1 mitotic arrest deficient-like 1 (yeast)         | Mad111  | 680006 | 1,13 | up   |
| 6596080 | 7096886 | 1119399 | MAD1 mitotic arrest deficient-like 1 (yeast)         | Mad111  | 680006 | 1,29 | up   |
| 6737664 | 7096886 | 1119407 | MAD1 mitotic arrest deficient-like 1 (yeast)         | Mad111  | 680006 | 1,29 | up   |
| 5712877 | 7281451 | 1576379 | MAD2 mitotic arrest deficient-like 2 (yeast)         | Mad212  | 313702 | 1,13 | down |
| 5724318 | 7281451 | 1576374 | MAD2 mitotic arrest deficient-like 2 (yeast)         | Mad212  | 313702 | 1,13 | up   |
| 5851897 | 7281451 | 1576378 | MAD2 mitotic arrest deficient-like 2 (yeast)         | Mad212  | 313702 | 1,56 | up   |
| 6009337 | 7281451 | 1576373 | MAD2 mitotic arrest deficient-like 2 (yeast)         | Mad212  | 313702 | 1,04 | down |
| 6140466 | 7281451 | 1576377 | MAD2 mitotic arrest deficient-like 2 (yeast)         | Mad212  | 313702 | 1,24 | up   |
| 6383971 | 7281451 | 1576378 | MAD2 mitotic arrest deficient-like 2 (yeast)         | Mad212  | 313702 | 1,40 | up   |
| 6423759 | 7281451 | 1576379 | MAD2 mitotic arrest deficient-like 2 (yeast)         | Mad212  | 313702 | 2,04 | down |
| 6439584 | 7281451 | 1576371 | MAD2 mitotic arrest deficient-like 2 (yeast)         | Mad212  | 313702 | 1,75 | down |
| 6455026 | 7281451 | 1576379 | MAD2 mitotic arrest deficient-like 2 (yeast)         | Mad212  | 313702 | 1,39 | down |
| 6515469 | 7281451 | 1576372 | MAD2 mitotic arrest deficient-like 2 (yeast)         | Mad212  | 313702 | 1,10 | up   |
| 6555818 | 7281451 | 1576375 | MAD2 mitotic arrest deficient-like 2 (yeast)         | Mad212  | 313702 | 1,24 | down |
| 6744059 | 7281451 | 1576376 | MAD2 mitotic arrest deficient-like 2 (yeast)         | Mad212  | 313702 | 1,46 | up   |
| 5822994 | 7138255 | 1221708 | magnesium-dependent phosphatase 1                    | Mdp-1   | 290230 | 1,15 | up   |
| 5904631 | 7138255 | 1221710 | magnesium-dependent phosphatase 1                    | Mdp-1   | 290230 | 1,07 | up   |
| 6033614 | 7138255 | 1221710 | magnesium-dependent phosphatase 1                    | Mdp-1   | 290230 | 1,29 | down |
| 6047010 | 7138255 | 1221710 | magnesium-dependent phosphatase 1                    | Mdp-1   | 290230 | 1,13 | up   |
| 6275129 | 7138255 | 1221707 | magnesium-dependent phosphatase 1                    | Mdp-1   | 290230 | 1,35 | up   |
| 6329583 | 7138255 | 1221709 | magnesium-dependent phosphatase 1                    | Mdp-1   | 290230 | 1,06 | down |
| 5784307 | 7115907 | 1166944 | major facilitator superfamily domain containing 7    | Mfsd7   | 305625 | 1,61 | down |
| 5822256 | 7115907 | 1166941 | major facilitator superfamily domain containing 7    | Mfsd7   | 305625 | 1,03 | up   |
| 5855944 | 7115907 | 1166953 | major facilitator superfamily domain containing 7    | Mfsd7   | 305625 | 1,03 | up   |
| 5921355 | 7115907 | 1166953 | major facilitator superfamily domain containing 7    | Mfsd7   | 305625 | 1,14 | up   |
| 5928401 | 7115907 | 1166945 | major facilitator superfamily domain containing 7    | Mfsd7   | 305625 | 1,09 | up   |
| 5962206 | 7115907 | 1166941 | major facilitator superfamily domain containing 7    | Mfsd7   | 305625 | 1,19 | up   |
| 6001193 | 7115907 | 1166943 | major facilitator superfamily domain containing 7    | Mfsd7   | 305625 | 1,06 | up   |
| 6080261 | 7115907 | 1166950 | major facilitator superfamily domain containing 7    | Mfsd7   | 305625 | 1,01 | up   |
| 6207791 | 7115907 | 1166952 | major facilitator superfamily domain containing 7    | Mfsd7   | 305625 | 1,05 | down |
| 6264089 | 7115907 | 1166947 | major facilitator superfamily domain containing 7    | Mfsd7   | 305625 | 2,07 | down |
| 6396211 | 7115907 | 1166948 | major facilitator superfamily domain containing 7    | Mfsd7   | 305625 | 1,02 | up   |
| 6508677 | 7115907 | 1166941 | major facilitator superfamily domain containing 7    | Mfsd7   | 305625 | 1,09 | down |
| 6545130 | 7115907 | 1166949 | major facilitator superfamily domain containing 7    | Mfsd7   | 305625 | 1,08 | up   |
| 6595803 | 7115907 | 1166954 | major facilitator superfamily domain containing 7    | Mfsd7   | 305625 | 1,45 | down |
| 5714569 | 7220942 | 1425094 | major histocompatibility complex, class II, DM alpha | Hla-dma | 294274 | 2,25 | up   |
| 5737701 | 7220942 | 1425095 | major histocompatibility complex, class II, DM alpha | Hla-dma | 294274 | 1,11 | down |
| 5811293 | 7220942 | 1425095 | major histocompatibility complex, class II, DM alpha | Hla-dma | 294274 | 1,60 | up   |
| 5915079 | 7220942 | 1425096 | major histocompatibility complex, class II, DM alpha | Hla-dma | 294274 | 1,26 | down |
| 6568267 | 7220942 | 1425093 | major histocompatibility complex, class II, DM alpha | Hla-dma | 294274 | 1,11 | up   |
| 6675680 | 7220942 | 1425092 | major histocompatibility complex, class II, DM alpha | Hla-dma | 294274 | 1,48 | up   |
| 5679354 | 7112562 | 1158602 | major histocompatibility complex, class I-related    | Mr1     | 25119  | 1,21 | down |
| 5923542 | 7112562 | 1158603 | major histocompatibility complex, class I-related    | Mr1     | 25119  | 1,05 | up   |
| 6056653 | 7112562 | 1158602 | major histocompatibility complex, class I-related    | Mr1     | 25119  | 1,48 | up   |
| 6085635 | 7112562 | 1158604 | major histocompatibility complex, class I-related    | Mr1     | 25119  | 1,11 | up   |

|         |         |         |                                                   |        |        |      |      |
|---------|---------|---------|---------------------------------------------------|--------|--------|------|------|
| 6479667 | 7112562 | 1158609 | major histocompatibility complex, class I-related | Mr1    | 25119  | 1,35 | down |
| 6659036 | 7112562 | 1158607 | major histocompatibility complex, class I-related | Mr1    | 25119  | 1,36 | up   |
| 5752499 | 7311773 | 1651621 | major intrinsic protein of lens fiber             | Mip    | 25480  | 1,38 | up   |
| 5756964 | 7311773 | 1651620 | major intrinsic protein of lens fiber             | Mip    | 25480  | 1,01 | down |
| 5786906 | 7311773 | 1651619 | major intrinsic protein of lens fiber             | Mip    | 25480  | 1,35 | down |
| 5848190 | 7311773 | 1651620 | major intrinsic protein of lens fiber             | Mip    | 25480  | 1,14 | down |
| 5913454 | 7311773 | 1651622 | major intrinsic protein of lens fiber             | Mip    | 25480  | 1,06 | up   |
| 5958561 | 7311773 | 1651623 | major intrinsic protein of lens fiber             | Mip    | 25480  | 1,91 | up   |
| 5992700 | 7311773 | 1651615 | major intrinsic protein of lens fiber             | Mip    | 25480  | 1,01 | down |
| 6226039 | 7311773 | 1651620 | major intrinsic protein of lens fiber             | Mip    | 25480  | 2,20 | down |
| 6529899 | 7311773 | 1651618 | major intrinsic protein of lens fiber             | Mip    | 25480  | 1,35 | down |
| 6604759 | 7311773 | 1651616 | major intrinsic protein of lens fiber             | Mip    | 25480  | 1,07 | up   |
| 6625474 | 7311773 | 1651619 | major intrinsic protein of lens fiber             | Mip    | 25480  | 2,12 | down |
| 6643719 | 7311773 | 1651620 | major intrinsic protein of lens fiber             | Mip    | 25480  | 1,02 | down |
| 5648054 | 7257576 | 1516743 | makorin, ring finger protein, 2                   | Mkrn2  | 297525 | 1,55 | up   |
| 5676664 | 7257576 | 1516746 | makorin, ring finger protein, 2                   | Mkrn2  | 297525 | 1,10 | down |
| 5917850 | 7257576 | 1516742 | makorin, ring finger protein, 2                   | Mkrn2  | 297525 | 1,25 | up   |
| 6066603 | 7257576 | 1516744 | makorin, ring finger protein, 2                   | Mkrn2  | 297525 | 1,35 | up   |
| 6068654 | 7257576 | 1516741 | makorin, ring finger protein, 2                   | Mkrn2  | 297525 | 1,58 | down |
| 6105886 | 7257576 | 1516748 | makorin, ring finger protein, 2                   | Mkrn2  | 297525 | 1,19 | down |
| 6126873 | 7257576 | 1516745 | makorin, ring finger protein, 2                   | Mkrn2  | 297525 | 1,15 | up   |
| 6217034 | 7257576 | 1516740 | makorin, ring finger protein, 2                   | Mkrn2  | 297525 | 1,14 | down |
| 6244857 | 7257576 | 1516739 | makorin, ring finger protein, 2                   | Mkrn2  | 297525 | 2,71 | up   |
| 6637215 | 7257576 | 1516742 | makorin, ring finger protein, 2                   | Mkrn2  | 297525 | 1,12 | down |
| 6651170 | 7257576 | 1516741 | makorin, ring finger protein, 2                   | Mkrn2  | 297525 | 1,31 | up   |
| 6677259 | 7257576 | 1516747 | makorin, ring finger protein, 2                   | Mkrn2  | 297525 | 1,10 | down |
| 6142714 | 7378878 | 1818326 | malignant T cell amplified sequence 1             | Mcts1  | 302500 | 1,33 | up   |
| 6207308 | 7378878 | 1818325 | malignant T cell amplified sequence 1             | Mcts1  | 302500 | 1,05 | down |
| 6228164 | 7378878 | 1818320 | malignant T cell amplified sequence 1             | Mcts1  | 302500 | 1,34 | up   |
| 6274632 | 7378878 | 1818319 | malignant T cell amplified sequence 1             | Mcts1  | 302500 | 1,23 | down |
| 6274679 | 7378878 | 1818321 | malignant T cell amplified sequence 1             | Mcts1  | 302500 | 1,26 | up   |
| 6291962 | 7378878 | 1818328 | malignant T cell amplified sequence 1             | Mcts1  | 302500 | 1,34 | up   |
| 6651804 | 7378878 | 1818327 | malignant T cell amplified sequence 1             | Mcts1  | 302500 | 1,24 | down |
| 6652490 | 7378878 | 1818328 | malignant T cell amplified sequence 1             | Mcts1  | 302500 | 1,43 | up   |
| 6679052 | 7378878 | 1818328 | malignant T cell amplified sequence 1             | Mcts1  | 302500 | 1,21 | up   |
| 5651902 | 7236840 | 1465339 | MAM domain containing 4                           | Mamdc4 | 252882 | 1,16 | up   |
| 5671453 | 7236840 | 1465347 | MAM domain containing 4                           | Mamdc4 | 252882 | 1,37 | up   |
| 5673504 | 7236840 | 1465346 | MAM domain containing 4                           | Mamdc4 | 252882 | 1,06 | up   |
| 5677530 | 7236840 | 1465352 | MAM domain containing 4                           | Mamdc4 | 252882 | 1,26 | up   |
| 5712668 | 7236840 | 1465362 | MAM domain containing 4                           | Mamdc4 | 252882 | 1,02 | down |
| 5723305 | 7236840 | 1465355 | MAM domain containing 4                           | Mamdc4 | 252882 | 1,40 | down |
| 5754116 | 7236840 | 1465357 | MAM domain containing 4                           | Mamdc4 | 252882 | 1,05 | down |
| 5770173 | 7236840 | 1465345 | MAM domain containing 4                           | Mamdc4 | 252882 | 1,13 | up   |
| 5786848 | 7236840 | 1465337 | MAM domain containing 4                           | Mamdc4 | 252882 | 1,57 | down |
| 5794686 | 7236840 | 1465351 | MAM domain containing 4                           | Mamdc4 | 252882 | 1,22 | down |
| 5831711 | 7236840 | 1465363 | MAM domain containing 4                           | Mamdc4 | 252882 | 1,12 | down |
| 5881075 | 7236840 | 1465344 | MAM domain containing 4                           | Mamdc4 | 252882 | 1,16 | up   |
| 5937696 | 7236840 | 1465343 | MAM domain containing 4                           | Mamdc4 | 252882 | 1,07 | up   |
| 5989710 | 7236840 | 1465349 | MAM domain containing 4                           | Mamdc4 | 252882 | 1,13 | up   |
| 5990880 | 7236840 | 1465350 | MAM domain containing 4                           | Mamdc4 | 252882 | 1,24 | up   |
| 6086528 | 7236840 | 1465348 | MAM domain containing 4                           | Mamdc4 | 252882 | 1,35 | down |
| 6320040 | 7236840 | 1465359 | MAM domain containing 4                           | Mamdc4 | 252882 | 1,08 | down |
| 6321900 | 7236840 | 1465341 | MAM domain containing 4                           | Mamdc4 | 252882 | 1,14 | down |
| 6342328 | 7236840 | 1465340 | MAM domain containing 4                           | Mamdc4 | 252882 | 1,11 | down |
| 6344010 | 7236840 | 1465360 | MAM domain containing 4                           | Mamdc4 | 252882 | 1,32 | down |
| 6381602 | 7236840 | 1465345 | MAM domain containing 4                           | Mamdc4 | 252882 | 2,12 | up   |

|         |         |         |                                                             |        |        |      |      |
|---------|---------|---------|-------------------------------------------------------------|--------|--------|------|------|
| 6397243 | 7236840 | 1465354 | MAM domain containing 4                                     | Mamdc4 | 252882 | 1,13 | up   |
| 6422502 | 7236840 | 1465336 | MAM domain containing 4                                     | Mamdc4 | 252882 | 1,04 | up   |
| 6426375 | 7236840 | 1465354 | MAM domain containing 4                                     | Mamdc4 | 252882 | 1,46 | down |
| 6426377 | 7236840 | 1465361 | MAM domain containing 4                                     | Mamdc4 | 252882 | 1,24 | down |
| 6435133 | 7236840 | 1465356 | MAM domain containing 4                                     | Mamdc4 | 252882 | 1,09 | up   |
| 6449016 | 7236840 | 1465353 | MAM domain containing 4                                     | Mamdc4 | 252882 | 1,04 | up   |
| 6530325 | 7236840 | 1465338 | MAM domain containing 4                                     | Mamdc4 | 252882 | 1,00 | up   |
| 6600265 | 7236840 | 1465358 | MAM domain containing 4                                     | Mamdc4 | 252882 | 1,23 | up   |
| 6648122 | 7236840 | 1465342 | MAM domain containing 4                                     | Mamdc4 | 252882 | 1,01 | up   |
| 6648844 | 7236840 | 1465352 | MAM domain containing 4                                     | Mamdc4 | 252882 | 1,16 | up   |
| 6704732 | 7236840 | 1465336 | MAM domain containing 4                                     | Mamdc4 | 252882 | 1,07 | down |
| 6712446 | 7236840 | 1465335 | MAM domain containing 4                                     | Mamdc4 | 252882 | 1,62 | up   |
| 5668117 | 7307276 | 1640801 | MAM domain containing glycosylphosphatidylinositol anchor 2 | Mdga2  | 314180 | 1,64 | down |
| 5687527 | 7307276 | 1640804 | MAM domain containing glycosylphosphatidylinositol anchor 2 | Mdga2  | 314180 | 1,00 | up   |
| 5767829 | 7307276 | 1640814 | MAM domain containing glycosylphosphatidylinositol anchor 2 | Mdga2  | 314180 | 1,11 | up   |
| 5821497 | 7307276 | 1640807 | MAM domain containing glycosylphosphatidylinositol anchor 2 | Mdga2  | 314180 | 1,04 | up   |
| 5843918 | 7307276 | 1640812 | MAM domain containing glycosylphosphatidylinositol anchor 2 | Mdga2  | 314180 | 1,04 | up   |
| 5868392 | 7307276 | 1640806 | MAM domain containing glycosylphosphatidylinositol anchor 2 | Mdga2  | 314180 | 1,13 | up   |
| 5873223 | 7307276 | 1640817 | MAM domain containing glycosylphosphatidylinositol anchor 2 | Mdga2  | 314180 | 2,06 | down |
| 5979351 | 7307276 | 1640803 | MAM domain containing glycosylphosphatidylinositol anchor 2 | Mdga2  | 314180 | 1,09 | up   |
| 6017551 | 7307276 | 1640813 | MAM domain containing glycosylphosphatidylinositol anchor 2 | Mdga2  | 314180 | 1,02 | up   |
| 6044391 | 7307276 | 1640811 | MAM domain containing glycosylphosphatidylinositol anchor 2 | Mdga2  | 314180 | 1,07 | up   |
| 6116543 | 7307276 | 1640817 | MAM domain containing glycosylphosphatidylinositol anchor 2 | Mdga2  | 314180 | 1,43 | up   |
| 6190236 | 7307276 | 1640802 | MAM domain containing glycosylphosphatidylinositol anchor 2 | Mdga2  | 314180 | 1,24 | down |
| 6214080 | 7307276 | 1640817 | MAM domain containing glycosylphosphatidylinositol anchor 2 | Mdga2  | 314180 | 1,44 | up   |
| 6258186 | 7307276 | 1640810 | MAM domain containing glycosylphosphatidylinositol anchor 2 | Mdga2  | 314180 | 1,10 | up   |
| 6293913 | 7307276 | 1640805 | MAM domain containing glycosylphosphatidylinositol anchor 2 | Mdga2  | 314180 | 1,58 | down |
| 6314300 | 7307276 | 1640808 | MAM domain containing glycosylphosphatidylinositol anchor 2 | Mdga2  | 314180 | 1,07 | up   |
| 6461394 | 7307276 | 1640816 | MAM domain containing glycosylphosphatidylinositol anchor 2 | Mdga2  | 314180 | 1,04 | down |
| 6502749 | 7307276 | 1640806 | MAM domain containing glycosylphosphatidylinositol anchor 2 | Mdga2  | 314180 | 1,02 | down |
| 6516493 | 7307276 | 1640809 | MAM domain containing glycosylphosphatidylinositol anchor 2 | Mdga2  | 314180 | 1,41 | up   |
| 6619507 | 7307276 | 1640815 | MAM domain containing glycosylphosphatidylinositol anchor 2 | Mdga2  | 314180 | 1,53 | down |
| 5646898 | 7281494 | 1576593 | mannan-binding lectin serine peptidase 2                    | Masp2  | 64459  | 1,01 | up   |
| 5725457 | 7281494 | 1576584 | mannan-binding lectin serine peptidase 2                    | Masp2  | 64459  | 2,09 | up   |
| 5818345 | 7281494 | 1576592 | mannan-binding lectin serine peptidase 2                    | Masp2  | 64459  | 1,20 | up   |
| 5916246 | 7281494 | 1576587 | mannan-binding lectin serine peptidase 2                    | Masp2  | 64459  | 1,09 | up   |
| 5977871 | 7281494 | 1576586 | mannan-binding lectin serine peptidase 2                    | Masp2  | 64459  | 1,27 | down |
| 6067700 | 7281494 | 1576585 | mannan-binding lectin serine peptidase 2                    | Masp2  | 64459  | 1,01 | down |
| 6144085 | 7281494 | 1576583 | mannan-binding lectin serine peptidase 2                    | Masp2  | 64459  | 1,05 | down |
| 6225170 | 7281494 | 1576588 | mannan-binding lectin serine peptidase 2                    | Masp2  | 64459  | 1,12 | up   |
| 6261320 | 7281494 | 1576594 | mannan-binding lectin serine peptidase 2                    | Masp2  | 64459  | 1,59 | down |
| 6396095 | 7281494 | 1576595 | mannan-binding lectin serine peptidase 2                    | Masp2  | 64459  | 1,09 | down |
| 6458443 | 7281494 | 1576586 | mannan-binding lectin serine peptidase 2                    | Masp2  | 64459  | 1,16 | up   |
| 6557927 | 7281494 | 1576590 | mannan-binding lectin serine peptidase 2                    | Masp2  | 64459  | 1,41 | down |
| 6558398 | 7281494 | 1576595 | mannan-binding lectin serine peptidase 2                    | Masp2  | 64459  | 1,17 | down |
| 6605413 | 7281494 | 1576584 | mannan-binding lectin serine peptidase 2                    | Masp2  | 64459  | 1,58 | up   |
| 5625132 | 7072754 | 1062640 | mannose receptor, C type 2                                  | Mrc2   | 498011 | 1,07 | up   |
| 5659422 | 7072754 | 1062669 | mannose receptor, C type 2                                  | Mrc2   | 498011 | 1,11 | up   |
| 5684927 | 7072754 | 1062670 | mannose receptor, C type 2                                  | Mrc2   | 498011 | 1,09 | up   |
| 5768776 | 7072754 | 1062669 | mannose receptor, C type 2                                  | Mrc2   | 498011 | 1,14 | up   |
| 5833527 | 7072754 | 1062659 | mannose receptor, C type 2                                  | Mrc2   | 498011 | 1,03 | down |
| 5848735 | 7072754 | 1062664 | mannose receptor, C type 2                                  | Mrc2   | 498011 | 1,53 | up   |
| 5894096 | 7072754 | 1062649 | mannose receptor, C type 2                                  | Mrc2   | 498011 | 1,09 | down |
| 6000452 | 7072754 | 1062643 | mannose receptor, C type 2                                  | Mrc2   | 498011 | 1,21 | up   |
| 6008638 | 7072754 | 1062633 | mannose receptor, C type 2                                  | Mrc2   | 498011 | 1,37 | up   |
| 6028807 | 7072754 | 1062645 | mannose receptor, C type 2                                  | Mrc2   | 498011 | 1,19 | up   |

|         |         |         |                                                                             |         |        |      |      |
|---------|---------|---------|-----------------------------------------------------------------------------|---------|--------|------|------|
| 6055179 | 7072754 | 1062666 | mannose receptor, C type 2                                                  | Mrc2    | 498011 | 1,12 | down |
| 6110329 | 7072754 | 1062673 | mannose receptor, C type 2                                                  | Mrc2    | 498011 | 1,02 | down |
| 6175867 | 7072754 | 1062641 | mannose receptor, C type 2                                                  | Mrc2    | 498011 | 2,09 | down |
| 6250857 | 7072754 | 1062667 | mannose receptor, C type 2                                                  | Mrc2    | 498011 | 1,16 | up   |
| 6251010 | 7072754 | 1062657 | mannose receptor, C type 2                                                  | Mrc2    | 498011 | 1,44 | up   |
| 6256962 | 7072754 | 1062665 | mannose receptor, C type 2                                                  | Mrc2    | 498011 | 1,11 | up   |
| 6268393 | 7072754 | 1062668 | mannose receptor, C type 2                                                  | Mrc2    | 498011 | 1,13 | down |
| 6333568 | 7072754 | 1062656 | mannose receptor, C type 2                                                  | Mrc2    | 498011 | 1,41 | up   |
| 6351334 | 7072754 | 1062654 | mannose receptor, C type 2                                                  | Mrc2    | 498011 | 1,01 | up   |
| 6382210 | 7072754 | 1062673 | mannose receptor, C type 2                                                  | Mrc2    | 498011 | 1,13 | up   |
| 6384769 | 7072754 | 1062663 | mannose receptor, C type 2                                                  | Mrc2    | 498011 | 1,17 | up   |
| 6409405 | 7072754 | 1062647 | mannose receptor, C type 2                                                  | Mrc2    | 498011 | 1,03 | down |
| 6442881 | 7072754 | 1062644 | mannose receptor, C type 2                                                  | Mrc2    | 498011 | 1,02 | up   |
| 6492585 | 7072754 | 1062646 | mannose receptor, C type 2                                                  | Mrc2    | 498011 | 1,10 | down |
| 6521248 | 7072754 | 1062663 | mannose receptor, C type 2                                                  | Mrc2    | 498011 | 1,16 | down |
| 6571064 | 7072754 | 1062661 | mannose receptor, C type 2                                                  | Mrc2    | 498011 | 1,13 | down |
| 6596954 | 7072754 | 1062662 | mannose receptor, C type 2                                                  | Mrc2    | 498011 | 2,06 | up   |
| 6609728 | 7072754 | 1062671 | mannose receptor, C type 2                                                  | Mrc2    | 498011 | 1,02 | down |
| 6686682 | 7072754 | 1062666 | mannose receptor, C type 2                                                  | Mrc2    | 498011 | 1,02 | down |
| 6712779 | 7072754 | 1062648 | mannose receptor, C type 2                                                  | Mrc2    | 498011 | 1,03 | up   |
| 6715681 | 7072754 | 1062660 | mannose receptor, C type 2                                                  | Mrc2    | 498011 | 1,03 | up   |
| 6023894 | 7367990 | 1789223 | mannose-6-phosphate receptor binding protein 1                              | M6prbp1 | 316130 | 1,25 | down |
| 6058891 | 7367990 | 1789220 | mannose-6-phosphate receptor binding protein 1                              | M6prbp1 | 316130 | 1,36 | down |
| 6078960 | 7367990 | 1789217 | mannose-6-phosphate receptor binding protein 1                              | M6prbp1 | 316130 | 1,35 | up   |
| 6522616 | 7367990 | 1789219 | mannose-6-phosphate receptor binding protein 1                              | M6prbp1 | 316130 | 1,10 | down |
| 6641959 | 7367990 | 1789227 | mannose-6-phosphate receptor binding protein 1                              | M6prbp1 | 316130 | 1,26 | up   |
| 5886542 | 7298913 | 1618794 | mannosyl (alpha-1,6-)-glycoprotein beta-1,2-N-acetylglucosaminyltransferase | Mgat2   | 94273  | 2,23 | up   |
| 5937491 | 7298913 | 1618796 | mannosyl (alpha-1,6-)-glycoprotein beta-1,2-N-acetylglucosaminyltransferase | Mgat2   | 94273  | 1,55 | down |
| 6339657 | 7298913 | 1618794 | mannosyl (alpha-1,6-)-glycoprotein beta-1,2-N-acetylglucosaminyltransferase | Mgat2   | 94273  | 1,57 | up   |
| 6535654 | 7298913 | 1618795 | mannosyl (alpha-1,6-)-glycoprotein beta-1,2-N-acetylglucosaminyltransferase | Mgat2   | 94273  | 1,15 | down |
| 6542491 | 7298913 | 1618794 | mannosyl (alpha-1,6-)-glycoprotein beta-1,2-N-acetylglucosaminyltransferase | Mgat2   | 94273  | 1,12 | up   |
| 5627288 | 7291032 | 1599333 | MAP7 domain containing 1                                                    | Map7d1  | 681287 | 1,07 | down |
| 5645949 | 7291032 | 1599330 | MAP7 domain containing 1                                                    | Map7d1  | 681287 | 1,34 | down |
| 5691978 | 7291032 | 1599337 | MAP7 domain containing 1                                                    | Map7d1  | 681287 | 1,05 | up   |
| 5721856 | 7291032 | 1599337 | MAP7 domain containing 1                                                    | Map7d1  | 681287 | 1,03 | up   |
| 5741742 | 7291032 | 1599332 | MAP7 domain containing 1                                                    | Map7d1  | 681287 | 1,31 | up   |
| 5825995 | 7291032 | 1599347 | MAP7 domain containing 1                                                    | Map7d1  | 681287 | 1,05 | up   |
| 5840112 | 7291032 | 1599337 | MAP7 domain containing 1                                                    | Map7d1  | 681287 | 1,20 | down |
| 5913750 | 7291032 | 1599342 | MAP7 domain containing 1                                                    | Map7d1  | 681287 | 1,13 | up   |
| 5953769 | 7291032 | 1599333 | MAP7 domain containing 1                                                    | Map7d1  | 681287 | 1,09 | up   |
| 6014186 | 7291032 | 1599332 | MAP7 domain containing 1                                                    | Map7d1  | 681287 | 1,42 | up   |
| 6033294 | 7291032 | 1599341 | MAP7 domain containing 1                                                    | Map7d1  | 681287 | 1,10 | down |
| 6099112 | 7291032 | 1599340 | MAP7 domain containing 1                                                    | Map7d1  | 681287 | 2,64 | down |
| 6117812 | 7291032 | 1599345 | MAP7 domain containing 1                                                    | Map7d1  | 681287 | 1,04 | up   |
| 6173305 | 7291032 | 1599339 | MAP7 domain containing 1                                                    | Map7d1  | 681287 | 1,45 | down |
| 6243741 | 7291032 | 1599339 | MAP7 domain containing 1                                                    | Map7d1  | 681287 | 1,03 | up   |
| 6341219 | 7291032 | 1599332 | MAP7 domain containing 1                                                    | Map7d1  | 681287 | 1,25 | up   |
| 6342458 | 7291032 | 1599332 | MAP7 domain containing 1                                                    | Map7d1  | 681287 | 1,34 | down |
| 6379159 | 7291032 | 1599346 | MAP7 domain containing 1                                                    | Map7d1  | 681287 | 1,43 | up   |
| 6489881 | 7291032 | 1599336 | MAP7 domain containing 1                                                    | Map7d1  | 681287 | 1,02 | up   |
| 6511484 | 7291032 | 1599337 | MAP7 domain containing 1                                                    | Map7d1  | 681287 | 1,21 | down |
| 6540106 | 7291032 | 1599334 | MAP7 domain containing 1                                                    | Map7d1  | 681287 | 1,02 | down |
| 6616044 | 7291032 | 1599340 | MAP7 domain containing 1                                                    | Map7d1  | 681287 | 1,01 | up   |
| 6623784 | 7291032 | 1599335 | MAP7 domain containing 1                                                    | Map7d1  | 681287 | 1,67 | down |
| 6678332 | 7291032 | 1599343 | MAP7 domain containing 1                                                    | Map7d1  | 681287 | 2,02 | up   |
| 6708579 | 7291032 | 1599346 | MAP7 domain containing 1                                                    | Map7d1  | 681287 | 1,17 | up   |

|         |         |         |                                |        |        |      |      |
|---------|---------|---------|--------------------------------|--------|--------|------|------|
| 6745202 | 7291032 | 1599344 | MAP7 domain containing 1       | Map7d1 | 681287 | 1,40 | down |
| 6068829 | 7332970 | 1702515 | mastermind like 2 (Drosophila) | Maml2  | 689844 | 1,25 | up   |
| 6626398 | 7332970 | 1702514 | mastermind like 2 (Drosophila) | Maml2  | 689844 | 1,31 | down |
| 5679590 | 7316054 | 1662295 | matrilin 2                     | Matn2  | 299996 | 1,08 | up   |
| 5766573 | 7316054 | 1662283 | matrilin 2                     | Matn2  | 299996 | 1,49 | down |
| 5970062 | 7316054 | 1662289 | matrilin 2                     | Matn2  | 299996 | 1,08 | up   |
| 5985316 | 7316054 | 1662302 | matrilin 2                     | Matn2  | 299996 | 1,80 | down |
| 5997659 | 7316054 | 1662293 | matrilin 2                     | Matn2  | 299996 | 1,06 | down |
| 6066756 | 7316054 | 1662297 | matrilin 2                     | Matn2  | 299996 | 1,19 | down |
| 6272973 | 7316054 | 1662298 | matrilin 2                     | Matn2  | 299996 | 1,72 | down |
| 6347833 | 7316054 | 1662262 | matrilin 2                     | Matn2  | 299996 | 2,59 | up   |
| 6398650 | 7316054 | 1662300 | matrilin 2                     | Matn2  | 299996 | 1,39 | up   |
| 6460929 | 7316054 | 1662286 | matrilin 2                     | Matn2  | 299996 | 1,01 | up   |
| 6463940 | 7316054 | 1662299 | matrilin 2                     | Matn2  | 299996 | 1,09 | down |
| 6484059 | 7316054 | 1662301 | matrilin 2                     | Matn2  | 299996 | 1,47 | up   |
| 6619103 | 7316054 | 1662284 | matrilin 2                     | Matn2  | 299996 | 1,09 | down |
| 6651210 | 7316054 | 1662288 | matrilin 2                     | Matn2  | 299996 | 1,18 | up   |
| 6651362 | 7316054 | 1662282 | matrilin 2                     | Matn2  | 299996 | 1,04 | down |
| 6661784 | 7316054 | 1662301 | matrilin 2                     | Matn2  | 299996 | 1,26 | down |
| 6738318 | 7316054 | 1662271 | matrilin 2                     | Matn2  | 299996 | 1,41 | down |
| 5657037 | 7247749 | 1491867 | matrilin 4                     | Matn4  | 296358 | 1,23 | up   |
| 5752431 | 7247749 | 1491879 | matrilin 4                     | Matn4  | 296358 | 2,09 | down |
| 5937887 | 7247749 | 1491874 | matrilin 4                     | Matn4  | 296358 | 1,09 | up   |
| 5979776 | 7247749 | 1491876 | matrilin 4                     | Matn4  | 296358 | 1,11 | up   |
| 6108142 | 7247749 | 1491871 | matrilin 4                     | Matn4  | 296358 | 2,13 | down |
| 6248792 | 7247749 | 1491878 | matrilin 4                     | Matn4  | 296358 | 1,63 | up   |
| 6254059 | 7247749 | 1491877 | matrilin 4                     | Matn4  | 296358 | 1,26 | down |
| 6295506 | 7247749 | 1491870 | matrilin 4                     | Matn4  | 296358 | 1,08 | down |
| 6304198 | 7247749 | 1491868 | matrilin 4                     | Matn4  | 296358 | 1,13 | down |
| 6649133 | 7247749 | 1491873 | matrilin 4                     | Matn4  | 296358 | 1,02 | up   |
| 6685642 | 7247749 | 1491872 | matrilin 4                     | Matn4  | 296358 | 1,01 | up   |
| 5645504 | 7182694 | 1332472 | matrix metallopeptidase 15     | Mmp15  | 291848 | 1,06 | up   |
| 5767965 | 7182694 | 1332478 | matrix metallopeptidase 15     | Mmp15  | 291848 | 1,63 | up   |
| 5798755 | 7182694 | 1332480 | matrix metallopeptidase 15     | Mmp15  | 291848 | 1,63 | down |
| 5935975 | 7182694 | 1332473 | matrix metallopeptidase 15     | Mmp15  | 291848 | 1,47 | up   |
| 6031851 | 7182694 | 1332474 | matrix metallopeptidase 15     | Mmp15  | 291848 | 1,46 | up   |
| 6089771 | 7182694 | 1332484 | matrix metallopeptidase 15     | Mmp15  | 291848 | 1,19 | up   |
| 6118667 | 7182694 | 1332481 | matrix metallopeptidase 15     | Mmp15  | 291848 | 1,26 | down |
| 6281770 | 7182694 | 1332479 | matrix metallopeptidase 15     | Mmp15  | 291848 | 2,23 | down |
| 6300833 | 7182694 | 1332484 | matrix metallopeptidase 15     | Mmp15  | 291848 | 1,34 | up   |
| 6416864 | 7182694 | 1332484 | matrix metallopeptidase 15     | Mmp15  | 291848 | 1,36 | up   |
| 6434230 | 7182694 | 1332477 | matrix metallopeptidase 15     | Mmp15  | 291848 | 1,32 | down |
| 6455904 | 7182694 | 1332477 | matrix metallopeptidase 15     | Mmp15  | 291848 | 1,12 | up   |
| 6488288 | 7182694 | 1332476 | matrix metallopeptidase 15     | Mmp15  | 291848 | 1,01 | down |
| 6531995 | 7182694 | 1332476 | matrix metallopeptidase 15     | Mmp15  | 291848 | 1,16 | up   |
| 6540910 | 7182694 | 1332475 | matrix metallopeptidase 15     | Mmp15  | 291848 | 1,60 | down |
| 6714410 | 7182694 | 1332484 | matrix metallopeptidase 15     | Mmp15  | 291848 | 2,00 | up   |
| 6746352 | 7182694 | 1332471 | matrix metallopeptidase 15     | Mmp15  | 291848 | 1,33 | down |
| 5624656 | 7273057 | 1555530 | matrix metallopeptidase 16     | Mmp16  | 65205  | 1,47 | down |
| 5750191 | 7273057 | 1555537 | matrix metallopeptidase 16     | Mmp16  | 65205  | 1,23 | up   |
| 5817429 | 7273057 | 1555528 | matrix metallopeptidase 16     | Mmp16  | 65205  | 1,03 | down |
| 5818668 | 7273057 | 1555529 | matrix metallopeptidase 16     | Mmp16  | 65205  | 1,02 | down |
| 5841192 | 7273057 | 1555535 | matrix metallopeptidase 16     | Mmp16  | 65205  | 1,14 | up   |
| 6023750 | 7273057 | 1555529 | matrix metallopeptidase 16     | Mmp16  | 65205  | 1,23 | down |
| 6059443 | 7273057 | 1555536 | matrix metallopeptidase 16     | Mmp16  | 65205  | 1,01 | down |
| 6130287 | 7273057 | 1555528 | matrix metallopeptidase 16     | Mmp16  | 65205  | 1,00 | up   |

|         |         |         |                             |       |        |      |      |
|---------|---------|---------|-----------------------------|-------|--------|------|------|
| 6176017 | 7273057 | 1555531 | matrix metallopeptidase 16  | Mmp16 | 65205  | 1,13 | up   |
| 6210728 | 7273057 | 1555532 | matrix metallopeptidase 16  | Mmp16 | 65205  | 2,03 | down |
| 6342847 | 7273057 | 1555528 | matrix metallopeptidase 16  | Mmp16 | 65205  | 1,24 | up   |
| 6417101 | 7273057 | 1555528 | matrix metallopeptidase 16  | Mmp16 | 65205  | 1,31 | down |
| 6435561 | 7273057 | 1555534 | matrix metallopeptidase 16  | Mmp16 | 65205  | 1,07 | up   |
| 6472672 | 7273057 | 1555528 | matrix metallopeptidase 16  | Mmp16 | 65205  | 1,97 | down |
| 6593983 | 7273057 | 1555537 | matrix metallopeptidase 16  | Mmp16 | 65205  | 1,07 | up   |
| 6599435 | 7273057 | 1555533 | matrix metallopeptidase 16  | Mmp16 | 65205  | 1,41 | up   |
| 6690916 | 7273057 | 1555537 | matrix metallopeptidase 16  | Mmp16 | 65205  | 1,34 | down |
| 5669362 | 7075082 | 1068527 | matrix metalloproteinase 25 | Mmp25 | 302963 | 1,47 | up   |
| 5675467 | 7075082 | 1068519 | matrix metalloproteinase 25 | Mmp25 | 302963 | 1,11 | up   |
| 5977393 | 7075082 | 1068530 | matrix metalloproteinase 25 | Mmp25 | 302963 | 1,04 | up   |
| 6064821 | 7075082 | 1068530 | matrix metalloproteinase 25 | Mmp25 | 302963 | 1,62 | down |
| 6097396 | 7075082 | 1068524 | matrix metalloproteinase 25 | Mmp25 | 302963 | 2,09 | up   |
| 6109006 | 7075082 | 1068521 | matrix metalloproteinase 25 | Mmp25 | 302963 | 1,12 | up   |
| 6116648 | 7075082 | 1068520 | matrix metalloproteinase 25 | Mmp25 | 302963 | 1,27 | down |
| 6215526 | 7075082 | 1068529 | matrix metalloproteinase 25 | Mmp25 | 302963 | 1,00 | down |
| 6354721 | 7075082 | 1068530 | matrix metalloproteinase 25 | Mmp25 | 302963 | 1,29 | down |
| 6555074 | 7075082 | 1068522 | matrix metalloproteinase 25 | Mmp25 | 302963 | 1,45 | down |
| 6619282 | 7075082 | 1068528 | matrix metalloproteinase 25 | Mmp25 | 302963 | 1,21 | up   |
| 5738248 | 7069613 | 1055093 | max binding protein         | Mnt   | 287521 | 1,15 | up   |
| 5747590 | 7069613 | 1055096 | max binding protein         | Mnt   | 287521 | 1,18 | down |
| 5808646 | 7069613 | 1055099 | max binding protein         | Mnt   | 287521 | 1,10 | down |
| 5870529 | 7069613 | 1055098 | max binding protein         | Mnt   | 287521 | 1,06 | up   |
| 5873057 | 7069613 | 1055092 | max binding protein         | Mnt   | 287521 | 1,61 | down |
| 5982899 | 7069613 | 1055095 | max binding protein         | Mnt   | 287521 | 1,18 | up   |
| 6012546 | 7069613 | 1055100 | max binding protein         | Mnt   | 287521 | 1,03 | up   |
| 6066645 | 7069613 | 1055099 | max binding protein         | Mnt   | 287521 | 1,65 | up   |
| 6265802 | 7069613 | 1055093 | max binding protein         | Mnt   | 287521 | 2,12 | up   |
| 6295882 | 7069613 | 1055093 | max binding protein         | Mnt   | 287521 | 1,08 | down |
| 6346771 | 7069613 | 1055091 | max binding protein         | Mnt   | 287521 | 1,03 | down |
| 6446629 | 7069613 | 1055094 | max binding protein         | Mnt   | 287521 | 2,02 | up   |
| 6462221 | 7069613 | 1055098 | max binding protein         | Mnt   | 287521 | 1,04 | down |
| 6568539 | 7069613 | 1055093 | max binding protein         | Mnt   | 287521 | 1,21 | down |
| 6707637 | 7069613 | 1055092 | max binding protein         | Mnt   | 287521 | 1,22 | down |
| 5821916 | 7266838 | 1538998 | max dimerization protein 1  | Mxd1  | 362391 | 1,20 | up   |
| 6018918 | 7266838 | 1538994 | max dimerization protein 1  | Mxd1  | 362391 | 1,56 | up   |
| 6064271 | 7266838 | 1538996 | max dimerization protein 1  | Mxd1  | 362391 | 1,09 | down |
| 6280587 | 7266838 | 1539000 | max dimerization protein 1  | Mxd1  | 362391 | 1,28 | up   |
| 6372983 | 7266838 | 1539000 | max dimerization protein 1  | Mxd1  | 362391 | 1,47 | down |
| 6401878 | 7266838 | 1538996 | max dimerization protein 1  | Mxd1  | 362391 | 1,09 | up   |
| 6436049 | 7266838 | 1538994 | max dimerization protein 1  | Mxd1  | 362391 | 1,12 | up   |
| 6438778 | 7266838 | 1538995 | max dimerization protein 1  | Mxd1  | 362391 | 1,23 | up   |
| 6439161 | 7266838 | 1538994 | max dimerization protein 1  | Mxd1  | 362391 | 1,21 | down |
| 6565282 | 7266838 | 1539001 | max dimerization protein 1  | Mxd1  | 362391 | 1,21 | down |
| 5659047 | 7231650 | 1451860 | MAX gene associated         | Mga   | 499874 | 1,26 | up   |
| 5665852 | 7231650 | 1451833 | MAX gene associated         | Mga   | 499874 | 1,09 | up   |
| 5775946 | 7231650 | 1451837 | MAX gene associated         | Mga   | 499874 | 1,10 | up   |
| 5811232 | 7231650 | 1451859 | MAX gene associated         | Mga   | 499874 | 1,28 | down |
| 5839567 | 7231650 | 1451840 | MAX gene associated         | Mga   | 499874 | 1,03 | down |
| 5897737 | 7231650 | 1451851 | MAX gene associated         | Mga   | 499874 | 1,02 | up   |
| 5990823 | 7231650 | 1451852 | MAX gene associated         | Mga   | 499874 | 1,15 | down |
| 5997397 | 7231650 | 1451839 | MAX gene associated         | Mga   | 499874 | 1,03 | down |
| 6032687 | 7231650 | 1451858 | MAX gene associated         | Mga   | 499874 | 1,04 | down |
| 6051472 | 7231650 | 1451861 | MAX gene associated         | Mga   | 499874 | 1,01 | up   |
| 6082103 | 7231650 | 1451846 | MAX gene associated         | Mga   | 499874 | 1,32 | up   |

|         |         |         |                           |      |        |      |      |
|---------|---------|---------|---------------------------|------|--------|------|------|
| 6158769 | 7231650 | 1451847 | MAX gene associated       | Mga  | 499874 | 1,25 | up   |
| 6181694 | 7231650 | 1451845 | MAX gene associated       | Mga  | 499874 | 1,19 | down |
| 6202290 | 7231650 | 1451841 | MAX gene associated       | Mga  | 499874 | 1,14 | up   |
| 6204513 | 7231650 | 1451859 | MAX gene associated       | Mga  | 499874 | 1,01 | down |
| 6239626 | 7231650 | 1451846 | MAX gene associated       | Mga  | 499874 | 1,17 | up   |
| 6250325 | 7231650 | 1451838 | MAX gene associated       | Mga  | 499874 | 1,02 | down |
| 6285471 | 7231650 | 1451850 | MAX gene associated       | Mga  | 499874 | 1,00 | down |
| 6290066 | 7231650 | 1451856 | MAX gene associated       | Mga  | 499874 | 1,07 | down |
| 6290887 | 7231650 | 1451832 | MAX gene associated       | Mga  | 499874 | 1,03 | down |
| 6298248 | 7231650 | 1451859 | MAX gene associated       | Mga  | 499874 | 1,01 | up   |
| 6367821 | 7231650 | 1451859 | MAX gene associated       | Mga  | 499874 | 1,20 | up   |
| 6413890 | 7231650 | 1451854 | MAX gene associated       | Mga  | 499874 | 1,11 | up   |
| 6414361 | 7231650 | 1451846 | MAX gene associated       | Mga  | 499874 | 3,47 | down |
| 6480768 | 7231650 | 1451855 | MAX gene associated       | Mga  | 499874 | 1,04 | up   |
| 6486142 | 7231650 | 1451833 | MAX gene associated       | Mga  | 499874 | 1,16 | down |
| 6544741 | 7231650 | 1451843 | MAX gene associated       | Mga  | 499874 | 1,28 | up   |
| 6595032 | 7231650 | 1451848 | MAX gene associated       | Mga  | 499874 | 1,02 | down |
| 6603900 | 7231650 | 1451853 | MAX gene associated       | Mga  | 499874 | 1,01 | down |
| 6631169 | 7231650 | 1451843 | MAX gene associated       | Mga  | 499874 | 1,11 | down |
| 6695447 | 7231650 | 1451834 | MAX gene associated       | Mga  | 499874 | 1,08 | down |
| 6706221 | 7231650 | 1451848 | MAX gene associated       | Mga  | 499874 | 1,20 | down |
| 6720616 | 7231650 | 1451844 | MAX gene associated       | Mga  | 499874 | 1,63 | down |
| 5781661 | 7043189 | 993062  | MAX interactor 1          | Mxi1 | 25701  | 1,02 | down |
| 5787771 | 7043189 | 993064  | MAX interactor 1          | Mxi1 | 25701  | 1,13 | up   |
| 5882982 | 7043189 | 993067  | MAX interactor 1          | Mxi1 | 25701  | 1,15 | down |
| 5972249 | 7043189 | 993061  | MAX interactor 1          | Mxi1 | 25701  | 2,06 | up   |
| 6089514 | 7043189 | 993066  | MAX interactor 1          | Mxi1 | 25701  | 1,48 | up   |
| 6349756 | 7043189 | 993065  | MAX interactor 1          | Mxi1 | 25701  | 1,21 | down |
| 6364926 | 7043189 | 993063  | MAX interactor 1          | Mxi1 | 25701  | 1,07 | down |
| 6573734 | 7043189 | 993067  | MAX interactor 1          | Mxi1 | 25701  | 1,29 | down |
| 5921393 | 7072225 | 1061403 | MAX-like protein X        | Mlx  | 360631 | 1,39 | up   |
| 5958294 | 7072225 | 1061401 | MAX-like protein X        | Mlx  | 360631 | 1,19 | up   |
| 6050836 | 7072225 | 1061401 | MAX-like protein X        | Mlx  | 360631 | 1,08 | up   |
| 6150680 | 7072225 | 1061401 | MAX-like protein X        | Mlx  | 360631 | 1,07 | up   |
| 6204334 | 7072225 | 1061407 | MAX-like protein X        | Mlx  | 360631 | 1,12 | down |
| 6226958 | 7072225 | 1061402 | MAX-like protein X        | Mlx  | 360631 | 1,38 | down |
| 6249054 | 7072225 | 1061401 | MAX-like protein X        | Mlx  | 360631 | 1,20 | up   |
| 6272173 | 7072225 | 1061401 | MAX-like protein X        | Mlx  | 360631 | 1,21 | down |
| 6333065 | 7072225 | 1061405 | MAX-like protein X        | Mlx  | 360631 | 1,24 | down |
| 6374605 | 7072225 | 1061406 | MAX-like protein X        | Mlx  | 360631 | 1,11 | down |
| 6421553 | 7072225 | 1061405 | MAX-like protein X        | Mlx  | 360631 | 1,32 | down |
| 6455550 | 7072225 | 1061404 | MAX-like protein X        | Mlx  | 360631 | 1,31 | down |
| 5619459 | 7245536 | 1486606 | McKusick-Kaufman syndrome | Mkks | 311456 | 1,00 | up   |
| 5686577 | 7245536 | 1486604 | McKusick-Kaufman syndrome | Mkks | 311456 | 2,08 | down |
| 5853391 | 7245536 | 1486606 | McKusick-Kaufman syndrome | Mkks | 311456 | 1,48 | up   |
| 5880093 | 7245536 | 1486605 | McKusick-Kaufman syndrome | Mkks | 311456 | 1,67 | down |
| 6138382 | 7245536 | 1486604 | McKusick-Kaufman syndrome | Mkks | 311456 | 1,01 | down |
| 6233183 | 7245536 | 1486604 | McKusick-Kaufman syndrome | Mkks | 311456 | 1,10 | down |
| 6238731 | 7245536 | 1486607 | McKusick-Kaufman syndrome | Mkks | 311456 | 1,00 | up   |
| 6279494 | 7245536 | 1486608 | McKusick-Kaufman syndrome | Mkks | 311456 | 1,01 | down |
| 6367059 | 7245536 | 1486607 | McKusick-Kaufman syndrome | Mkks | 311456 | 1,14 | down |
| 6455402 | 7245536 | 1486609 | McKusick-Kaufman syndrome | Mkks | 311456 | 1,54 | up   |
| 6466282 | 7245536 | 1486607 | McKusick-Kaufman syndrome | Mkks | 311456 | 1,04 | up   |
| 6495363 | 7245536 | 1486608 | McKusick-Kaufman syndrome | Mkks | 311456 | 1,14 | down |
| 6500935 | 7245536 | 1486610 | McKusick-Kaufman syndrome | Mkks | 311456 | 1,51 | up   |
| 6550821 | 7245536 | 1486604 | McKusick-Kaufman syndrome | Mkks | 311456 | 1,32 | down |



|         |         |         |                                          |       |        |      |      |
|---------|---------|---------|------------------------------------------|-------|--------|------|------|
| 6583905 | 7245536 | 1486604 | McKusick-Kaufman syndrome                | Mkks  | 311456 | 1,22 | up   |
| 6643188 | 7245536 | 1486609 | McKusick-Kaufman syndrome                | Mkks  | 311456 | 1,31 | up   |
| 5692726 | 7325416 | 1684591 | Mdm2 p53 binding protein homolog (mouse) | Mdm2  | 314856 | 1,05 | down |
| 5791899 | 7325416 | 1684591 | Mdm2 p53 binding protein homolog (mouse) | Mdm2  | 314856 | 1,09 | down |
| 5915045 | 7325416 | 1684597 | Mdm2 p53 binding protein homolog (mouse) | Mdm2  | 314856 | 1,06 | up   |
| 6108596 | 7325416 | 1684591 | Mdm2 p53 binding protein homolog (mouse) | Mdm2  | 314856 | 1,13 | up   |
| 6150437 | 7325416 | 1684595 | Mdm2 p53 binding protein homolog (mouse) | Mdm2  | 314856 | 1,44 | up   |
| 6178586 | 7325416 | 1684593 | Mdm2 p53 binding protein homolog (mouse) | Mdm2  | 314856 | 1,09 | up   |
| 6218132 | 7325416 | 1684604 | Mdm2 p53 binding protein homolog (mouse) | Mdm2  | 314856 | 1,08 | up   |
| 6242309 | 7325416 | 1684596 | Mdm2 p53 binding protein homolog (mouse) | Mdm2  | 314856 | 1,26 | down |
| 6330283 | 7325416 | 1684598 | Mdm2 p53 binding protein homolog (mouse) | Mdm2  | 314856 | 1,47 | down |
| 6369573 | 7325416 | 1684603 | Mdm2 p53 binding protein homolog (mouse) | Mdm2  | 314856 | 1,39 | down |
| 6527698 | 7325416 | 1684592 | Mdm2 p53 binding protein homolog (mouse) | Mdm2  | 314856 | 1,17 | up   |
| 6568748 | 7325416 | 1684602 | Mdm2 p53 binding protein homolog (mouse) | Mdm2  | 314856 | 1,00 | down |
| 6589842 | 7325416 | 1684599 | Mdm2 p53 binding protein homolog (mouse) | Mdm2  | 314856 | 1,28 | up   |
| 5731950 | 7373417 | 1805116 | mediator complex subunit 14              | Med14 | 317343 | 1,15 | down |
| 5754586 | 7373417 | 1805110 | mediator complex subunit 14              | Med14 | 317343 | 1,05 | down |
| 5792781 | 7373417 | 1805121 | mediator complex subunit 14              | Med14 | 317343 | 1,06 | up   |
| 5811086 | 7373417 | 1805118 | mediator complex subunit 14              | Med14 | 317343 | 1,11 | up   |
| 5820474 | 7373417 | 1805124 | mediator complex subunit 14              | Med14 | 317343 | 1,41 | up   |
| 5948391 | 7373417 | 1805111 | mediator complex subunit 14              | Med14 | 317343 | 1,10 | up   |
| 5998601 | 7373417 | 1805125 | mediator complex subunit 14              | Med14 | 317343 | 1,13 | down |
| 6019841 | 7373417 | 1805125 | mediator complex subunit 14              | Med14 | 317343 | 1,24 | down |
| 6029553 | 7373417 | 1805114 | mediator complex subunit 14              | Med14 | 317343 | 2,05 | up   |
| 6092473 | 7373417 | 1805124 | mediator complex subunit 14              | Med14 | 317343 | 1,03 | down |
| 6102767 | 7373417 | 1805123 | mediator complex subunit 14              | Med14 | 317343 | 1,08 | up   |
| 6176880 | 7373417 | 1805088 | mediator complex subunit 14              | Med14 | 317343 | 1,44 | down |
| 6198362 | 7373417 | 1805113 | mediator complex subunit 14              | Med14 | 317343 | 1,10 | down |
| 6222444 | 7373417 | 1805125 | mediator complex subunit 14              | Med14 | 317343 | 1,59 | up   |
| 6274748 | 7373417 | 1805117 | mediator complex subunit 14              | Med14 | 317343 | 1,18 | down |
| 6292156 | 7373417 | 1805116 | mediator complex subunit 14              | Med14 | 317343 | 1,22 | down |
| 6353089 | 7373417 | 1805088 | mediator complex subunit 14              | Med14 | 317343 | 1,27 | up   |
| 6363826 | 7373417 | 1805112 | mediator complex subunit 14              | Med14 | 317343 | 1,17 | down |
| 6485041 | 7373417 | 1805119 | mediator complex subunit 14              | Med14 | 317343 | 1,15 | down |
| 6523276 | 7373417 | 1805120 | mediator complex subunit 14              | Med14 | 317343 | 1,01 | down |
| 6607491 | 7373417 | 1805115 | mediator complex subunit 14              | Med14 | 317343 | 1,05 | up   |
| 5649488 | 7342414 | 1726091 | mediator complex subunit 17              | Med17 | 300367 | 1,61 | down |
| 5761611 | 7342414 | 1726096 | mediator complex subunit 17              | Med17 | 300367 | 1,29 | up   |
| 5782056 | 7342414 | 1726094 | mediator complex subunit 17              | Med17 | 300367 | 1,14 | down |
| 5966370 | 7342414 | 1726095 | mediator complex subunit 17              | Med17 | 300367 | 1,07 | up   |
| 6001957 | 7342414 | 1726088 | mediator complex subunit 17              | Med17 | 300367 | 1,22 | down |
| 6007453 | 7342414 | 1726089 | mediator complex subunit 17              | Med17 | 300367 | 1,76 | up   |
| 6025038 | 7342414 | 1726094 | mediator complex subunit 17              | Med17 | 300367 | 2,60 | down |
| 6105296 | 7342414 | 1726094 | mediator complex subunit 17              | Med17 | 300367 | 1,42 | up   |
| 6131349 | 7342414 | 1726097 | mediator complex subunit 17              | Med17 | 300367 | 1,32 | up   |
| 6279662 | 7342414 | 1726085 | mediator complex subunit 17              | Med17 | 300367 | 1,05 | down |
| 6311059 | 7342414 | 1726092 | mediator complex subunit 17              | Med17 | 300367 | 1,00 | down |
| 6405196 | 7342414 | 1726085 | mediator complex subunit 17              | Med17 | 300367 | 1,29 | down |
| 6418863 | 7342414 | 1726085 | mediator complex subunit 17              | Med17 | 300367 | 1,13 | down |
| 6439107 | 7342414 | 1726084 | mediator complex subunit 17              | Med17 | 300367 | 1,40 | down |
| 6465404 | 7342414 | 1726093 | mediator complex subunit 17              | Med17 | 300367 | 1,13 | down |
| 6575776 | 7342414 | 1726095 | mediator complex subunit 17              | Med17 | 300367 | 1,02 | up   |
| 6653031 | 7342414 | 1726094 | mediator complex subunit 17              | Med17 | 300367 | 1,02 | up   |
| 6704478 | 7342414 | 1726086 | mediator complex subunit 17              | Med17 | 300367 | 1,10 | down |
| 6722368 | 7342414 | 1726083 | mediator complex subunit 17              | Med17 | 300367 | 1,24 | down |
| 6391781 | 7278957 | 1570397 | mediator complex subunit 8               | Med8  | 362575 | 1,15 | down |

|         |         |         |                                                                              |       |        |      |      |
|---------|---------|---------|------------------------------------------------------------------------------|-------|--------|------|------|
| 6431450 | 7278957 | 1570397 | mediator complex subunit 8                                                   | Med8  | 362575 | 1,28 | down |
| 6472524 | 7278957 | 1570396 | mediator complex subunit 8                                                   | Med8  | 362575 | 1,23 | up   |
| 5630894 | 7322009 | 1676612 | megakaryocyte-associated tyrosine kinase                                     | Matk  | 60450  | 1,12 | down |
| 5720324 | 7322009 | 1676615 | megakaryocyte-associated tyrosine kinase                                     | Matk  | 60450  | 1,12 | up   |
| 5944865 | 7322009 | 1676622 | megakaryocyte-associated tyrosine kinase                                     | Matk  | 60450  | 2,34 | up   |
| 6062521 | 7322009 | 1676611 | megakaryocyte-associated tyrosine kinase                                     | Matk  | 60450  | 1,10 | down |
| 6108010 | 7322009 | 1676618 | megakaryocyte-associated tyrosine kinase                                     | Matk  | 60450  | 1,14 | up   |
| 6269917 | 7322009 | 1676619 | megakaryocyte-associated tyrosine kinase                                     | Matk  | 60450  | 1,15 | up   |
| 6382177 | 7322009 | 1676618 | megakaryocyte-associated tyrosine kinase                                     | Matk  | 60450  | 1,10 | down |
| 6389875 | 7322009 | 1676616 | megakaryocyte-associated tyrosine kinase                                     | Matk  | 60450  | 2,04 | down |
| 6468543 | 7322009 | 1676613 | megakaryocyte-associated tyrosine kinase                                     | Matk  | 60450  | 1,01 | down |
| 6486630 | 7322009 | 1676621 | megakaryocyte-associated tyrosine kinase                                     | Matk  | 60450  | 1,34 | up   |
| 6488446 | 7322009 | 1676610 | megakaryocyte-associated tyrosine kinase                                     | Matk  | 60450  | 1,21 | down |
| 6493822 | 7322009 | 1676614 | megakaryocyte-associated tyrosine kinase                                     | Matk  | 60450  | 1,53 | up   |
| 6513752 | 7322009 | 1676617 | megakaryocyte-associated tyrosine kinase                                     | Matk  | 60450  | 1,39 | up   |
| 6536935 | 7322009 | 1676612 | megakaryocyte-associated tyrosine kinase                                     | Matk  | 60450  | 1,64 | down |
| 6691537 | 7322009 | 1676620 | megakaryocyte-associated tyrosine kinase                                     | Matk  | 60450  | 1,12 | up   |
| 5629428 | 7330623 | 1696946 | megalencephalic leukoencephalopathy with subcortical cysts 1 homolog (human) | Mlc1  | 315215 | 1,05 | up   |
| 5632095 | 7330623 | 1696950 | megalencephalic leukoencephalopathy with subcortical cysts 1 homolog (human) | Mlc1  | 315215 | 1,33 | up   |
| 5806761 | 7330623 | 1696945 | megalencephalic leukoencephalopathy with subcortical cysts 1 homolog (human) | Mlc1  | 315215 | 1,03 | down |
| 5848794 | 7330623 | 1696955 | megalencephalic leukoencephalopathy with subcortical cysts 1 homolog (human) | Mlc1  | 315215 | 1,20 | down |
| 5857724 | 7330623 | 1696951 | megalencephalic leukoencephalopathy with subcortical cysts 1 homolog (human) | Mlc1  | 315215 | 1,54 | down |
| 5872842 | 7330623 | 1696949 | megalencephalic leukoencephalopathy with subcortical cysts 1 homolog (human) | Mlc1  | 315215 | 1,03 | down |
| 5892766 | 7330623 | 1696944 | megalencephalic leukoencephalopathy with subcortical cysts 1 homolog (human) | Mlc1  | 315215 | 1,02 | up   |
| 5916715 | 7330623 | 1696952 | megalencephalic leukoencephalopathy with subcortical cysts 1 homolog (human) | Mlc1  | 315215 | 1,35 | down |
| 6009397 | 7330623 | 1696957 | megalencephalic leukoencephalopathy with subcortical cysts 1 homolog (human) | Mlc1  | 315215 | 1,05 | up   |
| 6038510 | 7330623 | 1696960 | megalencephalic leukoencephalopathy with subcortical cysts 1 homolog (human) | Mlc1  | 315215 | 1,43 | down |
| 6221341 | 7330623 | 1696953 | megalencephalic leukoencephalopathy with subcortical cysts 1 homolog (human) | Mlc1  | 315215 | 1,04 | down |
| 6312723 | 7330623 | 1696956 | megalencephalic leukoencephalopathy with subcortical cysts 1 homolog (human) | Mlc1  | 315215 | 1,84 | down |
| 6340058 | 7330623 | 1696946 | megalencephalic leukoencephalopathy with subcortical cysts 1 homolog (human) | Mlc1  | 315215 | 1,14 | up   |
| 6633191 | 7330623 | 1696946 | megalencephalic leukoencephalopathy with subcortical cysts 1 homolog (human) | Mlc1  | 315215 | 1,41 | up   |
| 6697086 | 7330623 | 1696958 | megalencephalic leukoencephalopathy with subcortical cysts 1 homolog (human) | Mlc1  | 315215 | 2,07 | down |
| 5740671 | 7029078 | 958880  | Meis homeobox 3                                                              | Meis3 | 361514 | 2,15 | down |
| 5749769 | 7029078 | 958884  | Meis homeobox 3                                                              | Meis3 | 361514 | 1,70 | down |
| 5767945 | 7029078 | 958872  | Meis homeobox 3                                                              | Meis3 | 361514 | 2,22 | up   |
| 5939755 | 7029078 | 958875  | Meis homeobox 3                                                              | Meis3 | 361514 | 1,31 | down |
| 5962574 | 7029078 | 958881  | Meis homeobox 3                                                              | Meis3 | 361514 | 1,06 | up   |
| 6045129 | 7029078 | 958883  | Meis homeobox 3                                                              | Meis3 | 361514 | 1,08 | down |
| 6127606 | 7029078 | 958879  | Meis homeobox 3                                                              | Meis3 | 361514 | 1,42 | up   |
| 6322770 | 7029078 | 958877  | Meis homeobox 3                                                              | Meis3 | 361514 | 1,03 | down |
| 6389586 | 7029078 | 958875  | Meis homeobox 3                                                              | Meis3 | 361514 | 1,10 | up   |
| 6402186 | 7029078 | 958875  | Meis homeobox 3                                                              | Meis3 | 361514 | 1,05 | up   |
| 6417268 | 7029078 | 958878  | Meis homeobox 3                                                              | Meis3 | 361514 | 1,02 | down |
| 6534120 | 7029078 | 958876  | Meis homeobox 3                                                              | Meis3 | 361514 | 1,08 | up   |
| 6662186 | 7029078 | 958882  | Meis homeobox 3                                                              | Meis3 | 361514 | 1,34 | down |
| 5643493 | 7243363 | 1481615 | Meis1, myeloid ecotropic viral integration site 1 homolog 2                  | Meis2 | 311311 | 2,91 | down |
| 5704531 | 7243363 | 1481582 | Meis1, myeloid ecotropic viral integration site 1 homolog 2                  | Meis2 | 311311 | 1,66 | up   |
| 5787533 | 7243363 | 1481603 | Meis1, myeloid ecotropic viral integration site 1 homolog 2                  | Meis2 | 311311 | 1,43 | up   |
| 5792471 | 7243363 | 1481594 | Meis1, myeloid ecotropic viral integration site 1 homolog 2                  | Meis2 | 311311 | 1,42 | down |
| 5868010 | 7243363 | 1481621 | Meis1, myeloid ecotropic viral integration site 1 homolog 2                  | Meis2 | 311311 | 1,23 | up   |
| 5951238 | 7243363 | 1481582 | Meis1, myeloid ecotropic viral integration site 1 homolog 2                  | Meis2 | 311311 | 1,12 | down |
| 6056491 | 7243363 | 1481582 | Meis1, myeloid ecotropic viral integration site 1 homolog 2                  | Meis2 | 311311 | 1,41 | down |
| 6152648 | 7243363 | 1481587 | Meis1, myeloid ecotropic viral integration site 1 homolog 2                  | Meis2 | 311311 | 1,14 | down |
| 6198261 | 7243363 | 1481619 | Meis1, myeloid ecotropic viral integration site 1 homolog 2                  | Meis2 | 311311 | 1,01 | down |
| 6264492 | 7243363 | 1481615 | Meis1, myeloid ecotropic viral integration site 1 homolog 2                  | Meis2 | 311311 | 1,02 | up   |
| 6295724 | 7243363 | 1481584 | Meis1, myeloid ecotropic viral integration site 1 homolog 2                  | Meis2 | 311311 | 1,49 | down |

|         |         |         |                                                                      |       |        |      |      |
|---------|---------|---------|----------------------------------------------------------------------|-------|--------|------|------|
| 6306492 | 7243363 | 1481582 | Meis1, myeloid ecotropic viral integration site 1 homolog 2          | Meis2 | 311311 | 1,31 | up   |
| 6310451 | 7243363 | 1481623 | Meis1, myeloid ecotropic viral integration site 1 homolog 2          | Meis2 | 311311 | 1,02 | up   |
| 6353800 | 7243363 | 1481582 | Meis1, myeloid ecotropic viral integration site 1 homolog 2          | Meis2 | 311311 | 1,20 | up   |
| 6466614 | 7243363 | 1481624 | Meis1, myeloid ecotropic viral integration site 1 homolog 2          | Meis2 | 311311 | 1,39 | down |
| 6481807 | 7243363 | 1481620 | Meis1, myeloid ecotropic viral integration site 1 homolog 2          | Meis2 | 311311 | 1,33 | up   |
| 6553353 | 7243363 | 1481582 | Meis1, myeloid ecotropic viral integration site 1 homolog 2          | Meis2 | 311311 | 1,18 | down |
| 6606393 | 7243363 | 1481624 | Meis1, myeloid ecotropic viral integration site 1 homolog 2          | Meis2 | 311311 | 1,21 | down |
| 6728310 | 7243363 | 1481582 | Meis1, myeloid ecotropic viral integration site 1 homolog 2          | Meis2 | 311311 | 1,39 | up   |
| 5706482 | 7322260 | 1677069 | melanoma associated antigen (mutated) 1                              | Mum1  | 362838 | 1,28 | up   |
| 5801959 | 7322260 | 1677067 | melanoma associated antigen (mutated) 1                              | Mum1  | 362838 | 1,34 | down |
| 5818389 | 7322260 | 1677068 | melanoma associated antigen (mutated) 1                              | Mum1  | 362838 | 1,18 | down |
| 5930832 | 7322260 | 1677071 | melanoma associated antigen (mutated) 1                              | Mum1  | 362838 | 1,08 | up   |
| 5945900 | 7322260 | 1677067 | melanoma associated antigen (mutated) 1                              | Mum1  | 362838 | 1,29 | down |
| 5978838 | 7322260 | 1677066 | melanoma associated antigen (mutated) 1                              | Mum1  | 362838 | 1,10 | down |
| 6047552 | 7322260 | 1677066 | melanoma associated antigen (mutated) 1                              | Mum1  | 362838 | 1,13 | down |
| 6068330 | 7322260 | 1677065 | melanoma associated antigen (mutated) 1                              | Mum1  | 362838 | 1,40 | up   |
| 6183282 | 7322260 | 1677062 | melanoma associated antigen (mutated) 1                              | Mum1  | 362838 | 1,01 | up   |
| 6234210 | 7322260 | 1677073 | melanoma associated antigen (mutated) 1                              | Mum1  | 362838 | 1,03 | up   |
| 6355605 | 7322260 | 1677070 | melanoma associated antigen (mutated) 1                              | Mum1  | 362838 | 1,08 | up   |
| 6378262 | 7322260 | 1677074 | melanoma associated antigen (mutated) 1                              | Mum1  | 362838 | 1,15 | up   |
| 6610317 | 7322260 | 1677064 | melanoma associated antigen (mutated) 1                              | Mum1  | 362838 | 1,08 | up   |
| 6676705 | 7322260 | 1677062 | melanoma associated antigen (mutated) 1                              | Mum1  | 362838 | 1,00 | up   |
| 6530208 | 7363568 | 1778141 | melanoregulin                                                        | Mreg  | 501162 | 1,08 | up   |
| 5853559 | 7312575 | 1653360 | membralin                                                            | Mbrl  | 299608 | 1,20 | down |
| 6019793 | 7312575 | 1653359 | membralin                                                            | Mbrl  | 299608 | 1,15 | up   |
| 6064020 | 7312575 | 1653359 | membralin                                                            | Mbrl  | 299608 | 1,01 | up   |
| 6064749 | 7312575 | 1653359 | membralin                                                            | Mbrl  | 299608 | 1,19 | up   |
| 6088829 | 7312575 | 1653356 | membralin                                                            | Mbrl  | 299608 | 1,22 | down |
| 6261964 | 7312575 | 1653354 | membralin                                                            | Mbrl  | 299608 | 1,47 | down |
| 6343851 | 7312575 | 1653359 | membralin                                                            | Mbrl  | 299608 | 1,15 | up   |
| 6475156 | 7312575 | 1653353 | membralin                                                            | Mbrl  | 299608 | 1,27 | up   |
| 6519359 | 7312575 | 1653360 | membralin                                                            | Mbrl  | 299608 | 2,80 | down |
| 6535082 | 7312575 | 1653358 | membralin                                                            | Mbrl  | 299608 | 1,01 | up   |
| 6675432 | 7312575 | 1653357 | membralin                                                            | Mbrl  | 299608 | 1,04 | up   |
| 6678663 | 7312575 | 1653355 | membralin                                                            | Mbrl  | 299608 | 1,23 | down |
| 5630430 | 7260904 | 1525015 | membrane associated guanylate kinase, WW and PDZ domain containing 2 | Magi2 | 113970 | 1,23 | up   |
| 5656366 | 7260904 | 1524997 | membrane associated guanylate kinase, WW and PDZ domain containing 2 | Magi2 | 113970 | 1,12 | down |
| 5692371 | 7260904 | 1524999 | membrane associated guanylate kinase, WW and PDZ domain containing 2 | Magi2 | 113970 | 1,15 | up   |
| 5795888 | 7260904 | 1525000 | membrane associated guanylate kinase, WW and PDZ domain containing 2 | Magi2 | 113970 | 1,27 | down |
| 5809287 | 7260904 | 1525016 | membrane associated guanylate kinase, WW and PDZ domain containing 2 | Magi2 | 113970 | 1,03 | down |
| 5825856 | 7260904 | 1525010 | membrane associated guanylate kinase, WW and PDZ domain containing 2 | Magi2 | 113970 | 1,09 | down |
| 5866201 | 7260904 | 1525001 | membrane associated guanylate kinase, WW and PDZ domain containing 2 | Magi2 | 113970 | 1,08 | up   |
| 5873945 | 7260904 | 1524994 | membrane associated guanylate kinase, WW and PDZ domain containing 2 | Magi2 | 113970 | 1,17 | up   |
| 5889823 | 7260904 | 1525006 | membrane associated guanylate kinase, WW and PDZ domain containing 2 | Magi2 | 113970 | 1,19 | down |
| 5908835 | 7260904 | 1525003 | membrane associated guanylate kinase, WW and PDZ domain containing 2 | Magi2 | 113970 | 1,67 | up   |
| 5959000 | 7260904 | 1525018 | membrane associated guanylate kinase, WW and PDZ domain containing 2 | Magi2 | 113970 | 1,06 | up   |
| 6002004 | 7260904 | 1525018 | membrane associated guanylate kinase, WW and PDZ domain containing 2 | Magi2 | 113970 | 1,08 | down |
| 6053583 | 7260904 | 1524995 | membrane associated guanylate kinase, WW and PDZ domain containing 2 | Magi2 | 113970 | 1,06 | up   |
| 6097407 | 7260904 | 1525000 | membrane associated guanylate kinase, WW and PDZ domain containing 2 | Magi2 | 113970 | 1,06 | up   |
| 6131382 | 7260904 | 1525017 | membrane associated guanylate kinase, WW and PDZ domain containing 2 | Magi2 | 113970 | 1,11 | down |
| 6169256 | 7260904 | 1525010 | membrane associated guanylate kinase, WW and PDZ domain containing 2 | Magi2 | 113970 | 1,04 | down |
| 6183991 | 7260904 | 1525002 | membrane associated guanylate kinase, WW and PDZ domain containing 2 | Magi2 | 113970 | 1,20 | down |
| 6248898 | 7260904 | 1524995 | membrane associated guanylate kinase, WW and PDZ domain containing 2 | Magi2 | 113970 | 1,12 | up   |
| 6284344 | 7260904 | 1525009 | membrane associated guanylate kinase, WW and PDZ domain containing 2 | Magi2 | 113970 | 1,38 | down |
| 6395931 | 7260904 | 1525013 | membrane associated guanylate kinase, WW and PDZ domain containing 2 | Magi2 | 113970 | 2,07 | down |
| 6399886 | 7260904 | 1525007 | membrane associated guanylate kinase, WW and PDZ domain containing 2 | Magi2 | 113970 | 1,43 | up   |

|         |         |         |                                                                      |        |        |      |      |
|---------|---------|---------|----------------------------------------------------------------------|--------|--------|------|------|
| 6421441 | 7260904 | 1525014 | membrane associated guanylate kinase, WW and PDZ domain containing 2 | Magi2  | 113970 | 1,16 | down |
| 6490786 | 7260904 | 1525011 | membrane associated guanylate kinase, WW and PDZ domain containing 2 | Magi2  | 113970 | 1,41 | up   |
| 6495505 | 7260904 | 1524998 | membrane associated guanylate kinase, WW and PDZ domain containing 2 | Magi2  | 113970 | 1,04 | up   |
| 6543099 | 7260904 | 1525015 | membrane associated guanylate kinase, WW and PDZ domain containing 2 | Magi2  | 113970 | 1,30 | down |
| 6567511 | 7260904 | 1525005 | membrane associated guanylate kinase, WW and PDZ domain containing 2 | Magi2  | 113970 | 1,36 | down |
| 6665299 | 7260904 | 1525014 | membrane associated guanylate kinase, WW and PDZ domain containing 2 | Magi2  | 113970 | 1,75 | down |
| 6683545 | 7260904 | 1524994 | membrane associated guanylate kinase, WW and PDZ domain containing 2 | Magi2  | 113970 | 1,24 | down |
| 6701153 | 7260904 | 1525004 | membrane associated guanylate kinase, WW and PDZ domain containing 2 | Magi2  | 113970 | 1,08 | up   |
| 6704093 | 7260904 | 1525008 | membrane associated guanylate kinase, WW and PDZ domain containing 2 | Magi2  | 113970 | 1,08 | down |
| 6727489 | 7260904 | 1524996 | membrane associated guanylate kinase, WW and PDZ domain containing 2 | Magi2  | 113970 | 1,72 | up   |
| 6727574 | 7260904 | 1525012 | membrane associated guanylate kinase, WW and PDZ domain containing 2 | Magi2  | 113970 | 1,09 | up   |
| 5668216 | 7212308 | 1404016 | membrane associated guanylate kinase, WW and PDZ domain containing 3 | Magi3  | 245903 | 1,61 | down |
| 5674835 | 7212308 | 1404023 | membrane associated guanylate kinase, WW and PDZ domain containing 3 | Magi3  | 245903 | 1,46 | down |
| 5685599 | 7212308 | 1404021 | membrane associated guanylate kinase, WW and PDZ domain containing 3 | Magi3  | 245903 | 1,33 | down |
| 5745527 | 7212308 | 1404018 | membrane associated guanylate kinase, WW and PDZ domain containing 3 | Magi3  | 245903 | 1,08 | up   |
| 5812062 | 7212308 | 1404033 | membrane associated guanylate kinase, WW and PDZ domain containing 3 | Magi3  | 245903 | 1,69 | up   |
| 5929301 | 7212308 | 1404027 | membrane associated guanylate kinase, WW and PDZ domain containing 3 | Magi3  | 245903 | 1,14 | up   |
| 5986838 | 7212308 | 1404035 | membrane associated guanylate kinase, WW and PDZ domain containing 3 | Magi3  | 245903 | 1,14 | down |
| 6067736 | 7212308 | 1404015 | membrane associated guanylate kinase, WW and PDZ domain containing 3 | Magi3  | 245903 | 1,05 | up   |
| 6151160 | 7212308 | 1404030 | membrane associated guanylate kinase, WW and PDZ domain containing 3 | Magi3  | 245903 | 2,37 | down |
| 6165642 | 7212308 | 1404032 | membrane associated guanylate kinase, WW and PDZ domain containing 3 | Magi3  | 245903 | 1,08 | up   |
| 6170654 | 7212308 | 1404015 | membrane associated guanylate kinase, WW and PDZ domain containing 3 | Magi3  | 245903 | 1,29 | up   |
| 6272516 | 7212308 | 1404031 | membrane associated guanylate kinase, WW and PDZ domain containing 3 | Magi3  | 245903 | 1,04 | up   |
| 6279125 | 7212308 | 1404024 | membrane associated guanylate kinase, WW and PDZ domain containing 3 | Magi3  | 245903 | 1,20 | up   |
| 6294277 | 7212308 | 1404034 | membrane associated guanylate kinase, WW and PDZ domain containing 3 | Magi3  | 245903 | 1,25 | up   |
| 6367868 | 7212308 | 1404017 | membrane associated guanylate kinase, WW and PDZ domain containing 3 | Magi3  | 245903 | 1,14 | down |
| 6410237 | 7212308 | 1404034 | membrane associated guanylate kinase, WW and PDZ domain containing 3 | Magi3  | 245903 | 1,58 | up   |
| 6418477 | 7212308 | 1404026 | membrane associated guanylate kinase, WW and PDZ domain containing 3 | Magi3  | 245903 | 1,15 | up   |
| 6424905 | 7212308 | 1404019 | membrane associated guanylate kinase, WW and PDZ domain containing 3 | Magi3  | 245903 | 2,61 | down |
| 6502643 | 7212308 | 1404015 | membrane associated guanylate kinase, WW and PDZ domain containing 3 | Magi3  | 245903 | 1,45 | up   |
| 6543030 | 7212308 | 1404020 | membrane associated guanylate kinase, WW and PDZ domain containing 3 | Magi3  | 245903 | 1,08 | down |
| 6578232 | 7212308 | 1404028 | membrane associated guanylate kinase, WW and PDZ domain containing 3 | Magi3  | 245903 | 2,26 | up   |
| 6621989 | 7212308 | 1404022 | membrane associated guanylate kinase, WW and PDZ domain containing 3 | Magi3  | 245903 | 1,07 | up   |
| 6639766 | 7212308 | 1404029 | membrane associated guanylate kinase, WW and PDZ domain containing 3 | Magi3  | 245903 | 1,03 | up   |
| 6682420 | 7212308 | 1404025 | membrane associated guanylate kinase, WW and PDZ domain containing 3 | Magi3  | 245903 | 1,40 | down |
| 6728002 | 7212308 | 1404035 | membrane associated guanylate kinase, WW and PDZ domain containing 3 | Magi3  | 245903 | 1,28 | up   |
| 5682998 | 7299622 | 1620875 | membrane protein, palmitoylated 5 (MAGUK p55 subfamily member 5)     | Mpp5   | 314259 | 1,30 | up   |
| 5801349 | 7299622 | 1620872 | membrane protein, palmitoylated 5 (MAGUK p55 subfamily member 5)     | Mpp5   | 314259 | 1,05 | up   |
| 5888175 | 7299622 | 1620867 | membrane protein, palmitoylated 5 (MAGUK p55 subfamily member 5)     | Mpp5   | 314259 | 1,19 | up   |
| 5944692 | 7299622 | 1620860 | membrane protein, palmitoylated 5 (MAGUK p55 subfamily member 5)     | Mpp5   | 314259 | 1,03 | down |
| 5995200 | 7299622 | 1620876 | membrane protein, palmitoylated 5 (MAGUK p55 subfamily member 5)     | Mpp5   | 314259 | 1,04 | down |
| 6014953 | 7299622 | 1620874 | membrane protein, palmitoylated 5 (MAGUK p55 subfamily member 5)     | Mpp5   | 314259 | 1,30 | up   |
| 6041638 | 7299622 | 1620878 | membrane protein, palmitoylated 5 (MAGUK p55 subfamily member 5)     | Mpp5   | 314259 | 1,15 | up   |
| 6164242 | 7299622 | 1620879 | membrane protein, palmitoylated 5 (MAGUK p55 subfamily member 5)     | Mpp5   | 314259 | 1,02 | up   |
| 6236641 | 7299622 | 1620865 | membrane protein, palmitoylated 5 (MAGUK p55 subfamily member 5)     | Mpp5   | 314259 | 1,39 | down |
| 6356627 | 7299622 | 1620881 | membrane protein, palmitoylated 5 (MAGUK p55 subfamily member 5)     | Mpp5   | 314259 | 2,21 | down |
| 6374815 | 7299622 | 1620868 | membrane protein, palmitoylated 5 (MAGUK p55 subfamily member 5)     | Mpp5   | 314259 | 1,45 | down |
| 6393437 | 7299622 | 1620869 | membrane protein, palmitoylated 5 (MAGUK p55 subfamily member 5)     | Mpp5   | 314259 | 1,08 | up   |
| 6409205 | 7299622 | 1620873 | membrane protein, palmitoylated 5 (MAGUK p55 subfamily member 5)     | Mpp5   | 314259 | 2,25 | down |
| 6561716 | 7299622 | 1620880 | membrane protein, palmitoylated 5 (MAGUK p55 subfamily member 5)     | Mpp5   | 314259 | 1,45 | down |
| 6588820 | 7299622 | 1620866 | membrane protein, palmitoylated 5 (MAGUK p55 subfamily member 5)     | Mpp5   | 314259 | 1,28 | up   |
| 6600682 | 7299622 | 1620871 | membrane protein, palmitoylated 5 (MAGUK p55 subfamily member 5)     | Mpp5   | 314259 | 1,41 | up   |
| 6702157 | 7299622 | 1620870 | membrane protein, palmitoylated 5 (MAGUK p55 subfamily member 5)     | Mpp5   | 314259 | 1,22 | up   |
| 5724497 | 7150348 | 1251385 | membrane-associated ring finger (C3HC4) 1                            | March1 | 361135 | 1,21 | down |
| 5854394 | 7150348 | 1251382 | membrane-associated ring finger (C3HC4) 1                            | March1 | 361135 | 1,44 | down |
| 6236003 | 7150348 | 1251405 | membrane-associated ring finger (C3HC4) 1                            | March1 | 361135 | 1,00 | up   |

|         |         |         |                                                     |        |        |      |      |
|---------|---------|---------|-----------------------------------------------------|--------|--------|------|------|
| 6271869 | 7150348 | 1251382 | membrane-associated ring finger (C3HC4) 1           | March1 | 361135 | 1,07 | up   |
| 6511620 | 7150348 | 1251398 | membrane-associated ring finger (C3HC4) 1           | March1 | 361135 | 1,88 | down |
| 6591212 | 7150348 | 1251393 | membrane-associated ring finger (C3HC4) 1           | March1 | 361135 | 1,03 | up   |
| 5829594 | 7363576 | 1778170 | membrane-associated ring finger (C3HC4) 4           | March4 | 367295 | 1,06 | down |
| 5960955 | 7318588 | 1668914 | mercaptopyruvate sulfurtransferase                  | Mpst   | 192172 | 1,08 | up   |
| 6183923 | 7318588 | 1668915 | mercaptopyruvate sulfurtransferase                  | Mpst   | 192172 | 1,16 | up   |
| 6215314 | 7318588 | 1668914 | mercaptopyruvate sulfurtransferase                  | Mpst   | 192172 | 2,36 | down |
| 6424889 | 7318588 | 1668916 | mercaptopyruvate sulfurtransferase                  | Mpst   | 192172 | 1,20 | up   |
| 6669347 | 7318588 | 1668914 | mercaptopyruvate sulfurtransferase                  | Mpst   | 192172 | 1,50 | up   |
| 5946241 | 7297481 | 1615236 | mesenchyme homeobox 2                               | Meox2  | 29279  | 1,03 | up   |
| 6014527 | 7297481 | 1615238 | mesenchyme homeobox 2                               | Meox2  | 29279  | 1,00 | down |
| 6194209 | 7297481 | 1615235 | mesenchyme homeobox 2                               | Meox2  | 29279  | 1,04 | down |
| 6438704 | 7297481 | 1615235 | mesenchyme homeobox 2                               | Meox2  | 29279  | 2,05 | down |
| 6501782 | 7297481 | 1615237 | mesenchyme homeobox 2                               | Meox2  | 29279  | 1,38 | down |
| 6610350 | 7297481 | 1615235 | mesenchyme homeobox 2                               | Meox2  | 29279  | 1,07 | up   |
| 6254479 | 7182917 | 1332973 | metallothionein 1a                                  | Mt1a   | 24567  | 1,04 | up   |
| 6433979 | 7182917 | 1332971 | metallothionein 1a                                  | Mt1a   | 24567  | 1,27 | up   |
| 6510346 | 7182917 | 1332972 | metallothionein 1a                                  | Mt1a   | 24567  | 1,14 | up   |
| 6580390 | 7182917 | 1332974 | metallothionein 1a                                  | Mt1a   | 24567  | 5,41 | down |
| 6255556 | 7181016 | 1327789 | metastasis suppressor 1-like                        | Mtss1l | 307845 | 1,44 | up   |
| 6498938 | 7181016 | 1327794 | metastasis suppressor 1-like                        | Mtss1l | 307845 | 1,60 | down |
| 6672829 | 7181016 | 1327793 | metastasis suppressor 1-like                        | Mtss1l | 307845 | 1,02 | up   |
| 5631366 | 7369706 | 1794786 | meteorin, glial cell differentiation regulator-like | Metrl  | 316842 | 1,21 | down |
| 5857528 | 7369706 | 1794788 | meteorin, glial cell differentiation regulator-like | Metrl  | 316842 | 1,12 | up   |
| 6065660 | 7369706 | 1794795 | meteorin, glial cell differentiation regulator-like | Metrl  | 316842 | 1,46 | up   |
| 6137310 | 7369706 | 1794786 | meteorin, glial cell differentiation regulator-like | Metrl  | 316842 | 1,45 | down |
| 6514307 | 7369706 | 1794795 | meteorin, glial cell differentiation regulator-like | Metrl  | 316842 | 1,20 | up   |
| 6578018 | 7369706 | 1794791 | meteorin, glial cell differentiation regulator-like | Metrl  | 316842 | 2,02 | down |
| 6657029 | 7369706 | 1794786 | meteorin, glial cell differentiation regulator-like | Metrl  | 316842 | 1,19 | down |
| 5733020 | 7228656 | 1444244 | methionine aminopeptidase 1D                        | Map1d  | 311748 | 2,35 | up   |
| 5882865 | 7228656 | 1444253 | methionine aminopeptidase 1D                        | Map1d  | 311748 | 1,06 | down |
| 5952630 | 7228656 | 1444254 | methionine aminopeptidase 1D                        | Map1d  | 311748 | 1,07 | up   |
| 6076477 | 7228656 | 1444254 | methionine aminopeptidase 1D                        | Map1d  | 311748 | 1,20 | down |
| 6146385 | 7228656 | 1444243 | methionine aminopeptidase 1D                        | Map1d  | 311748 | 1,41 | down |
| 6218279 | 7228656 | 1444245 | methionine aminopeptidase 1D                        | Map1d  | 311748 | 1,32 | down |
| 6219559 | 7228656 | 1444225 | methionine aminopeptidase 1D                        | Map1d  | 311748 | 1,27 | down |
| 6375963 | 7228656 | 1444225 | methionine aminopeptidase 1D                        | Map1d  | 311748 | 1,60 | up   |
| 6387600 | 7228656 | 1444242 | methionine aminopeptidase 1D                        | Map1d  | 311748 | 1,01 | up   |
| 6398489 | 7228656 | 1444247 | methionine aminopeptidase 1D                        | Map1d  | 311748 | 1,42 | up   |
| 6460675 | 7228656 | 1444251 | methionine aminopeptidase 1D                        | Map1d  | 311748 | 1,30 | up   |
| 6517097 | 7228656 | 1444252 | methionine aminopeptidase 1D                        | Map1d  | 311748 | 1,19 | down |
| 5643435 | 7172072 | 1304768 | methyl-CpG binding domain protein 1                 | Mbd1   | 291439 | 1,23 | down |
| 5676357 | 7172072 | 1304766 | methyl-CpG binding domain protein 1                 | Mbd1   | 291439 | 1,10 | up   |
| 5714828 | 7172072 | 1304759 | methyl-CpG binding domain protein 1                 | Mbd1   | 291439 | 1,01 | up   |
| 5745378 | 7172072 | 1304758 | methyl-CpG binding domain protein 1                 | Mbd1   | 291439 | 2,41 | down |
| 5826039 | 7172072 | 1304765 | methyl-CpG binding domain protein 1                 | Mbd1   | 291439 | 1,26 | up   |
| 6032254 | 7172072 | 1304761 | methyl-CpG binding domain protein 1                 | Mbd1   | 291439 | 1,43 | up   |
| 6058201 | 7172072 | 1304764 | methyl-CpG binding domain protein 1                 | Mbd1   | 291439 | 1,15 | down |
| 6176410 | 7172072 | 1304764 | methyl-CpG binding domain protein 1                 | Mbd1   | 291439 | 1,18 | up   |
| 6325780 | 7172072 | 1304758 | methyl-CpG binding domain protein 1                 | Mbd1   | 291439 | 1,01 | down |
| 6366467 | 7172072 | 1304769 | methyl-CpG binding domain protein 1                 | Mbd1   | 291439 | 1,20 | down |
| 6418510 | 7172072 | 1304760 | methyl-CpG binding domain protein 1                 | Mbd1   | 291439 | 1,03 | down |
| 6475886 | 7172072 | 1304767 | methyl-CpG binding domain protein 1                 | Mbd1   | 291439 | 1,06 | up   |
| 6488862 | 7172072 | 1304756 | methyl-CpG binding domain protein 1                 | Mbd1   | 291439 | 1,09 | up   |
| 6605394 | 7172072 | 1304763 | methyl-CpG binding domain protein 1                 | Mbd1   | 291439 | 1,12 | up   |
| 6671451 | 7172072 | 1304762 | methyl-CpG binding domain protein 1                 | Mbd1   | 291439 | 1,34 | up   |

|         |         |         |                                                                                                                             |        |        |      |      |
|---------|---------|---------|-----------------------------------------------------------------------------------------------------------------------------|--------|--------|------|------|
| 6712675 | 7172072 | 1304757 | methyl-CpG binding domain protein 1                                                                                         | Mbd1   | 291439 | 1,07 | up   |
| 6737079 | 7172072 | 1304764 | methyl-CpG binding domain protein 1                                                                                         | Mbd1   | 291439 | 1,17 | up   |
| 5661170 | 7180243 | 1325514 | methylmalonic aciduria (cobalamin deficiency) cblA type                                                                     | Mmaa   | 291939 | 1,21 | up   |
| 5734197 | 7180243 | 1325503 | methylmalonic aciduria (cobalamin deficiency) cblA type                                                                     | Mmaa   | 291939 | 2,11 | up   |
| 5753349 | 7180243 | 1325514 | methylmalonic aciduria (cobalamin deficiency) cblA type                                                                     | Mmaa   | 291939 | 1,20 | up   |
| 6072887 | 7180243 | 1325513 | methylmalonic aciduria (cobalamin deficiency) cblA type                                                                     | Mmaa   | 291939 | 1,03 | up   |
| 6092102 | 7180243 | 1325513 | methylmalonic aciduria (cobalamin deficiency) cblA type                                                                     | Mmaa   | 291939 | 1,00 | up   |
| 6094451 | 7180243 | 1325503 | methylmalonic aciduria (cobalamin deficiency) cblA type                                                                     | Mmaa   | 291939 | 1,43 | down |
| 6288199 | 7180243 | 1325510 | methylmalonic aciduria (cobalamin deficiency) cblA type                                                                     | Mmaa   | 291939 | 1,04 | up   |
| 6315817 | 7180243 | 1325511 | methylmalonic aciduria (cobalamin deficiency) cblA type                                                                     | Mmaa   | 291939 | 1,01 | down |
| 6355657 | 7180243 | 1325506 | methylmalonic aciduria (cobalamin deficiency) cblA type                                                                     | Mmaa   | 291939 | 1,06 | down |
| 6411786 | 7180243 | 1325513 | methylmalonic aciduria (cobalamin deficiency) cblA type                                                                     | Mmaa   | 291939 | 1,90 | up   |
| 6549930 | 7180243 | 1325513 | methylmalonic aciduria (cobalamin deficiency) cblA type                                                                     | Mmaa   | 291939 | 1,56 | down |
| 6068621 | 7216994 | 1415204 | MHC class I RT1.Aa alpha-chain /// RT1 class I, A3 /// RT1 class Ib, locus Aw2 //3 /// RT1-Aw2 /// R'B09627 /// 24737 /// 2 |        |        | 1,05 | down |
| 6073732 | 7216994 | 1415204 | MHC class I RT1.Aa alpha-chain /// RT1 class I, A3 /// RT1 class Ib, locus Aw2 //3 /// RT1-Aw2 /// R'B09627 /// 24737 /// 2 |        |        | 1,02 | down |
| 5807970 | 7269258 | 1545452 | microtubule associated monooxygenase, calponin and LIM domain containing 3                                                  | Mical3 | 362427 | 1,11 | up   |
| 5854513 | 7269258 | 1545449 | microtubule associated monooxygenase, calponin and LIM domain containing 3                                                  | Mical3 | 362427 | 1,36 | down |
| 6084706 | 7269258 | 1545447 | microtubule associated monooxygenase, calponin and LIM domain containing 3                                                  | Mical3 | 362427 | 1,08 | up   |
| 6150262 | 7269258 | 1545452 | microtubule associated monooxygenase, calponin and LIM domain containing 3                                                  | Mical3 | 362427 | 1,44 | down |
| 6157238 | 7269258 | 1545450 | microtubule associated monooxygenase, calponin and LIM domain containing 3                                                  | Mical3 | 362427 | 2,71 | down |
| 6541727 | 7269258 | 1545454 | microtubule associated monooxygenase, calponin and LIM domain containing 3                                                  | Mical3 | 362427 | 1,02 | up   |
| 6557209 | 7269258 | 1545448 | microtubule associated monooxygenase, calponin and LIM domain containing 3                                                  | Mical3 | 362427 | 1,36 | up   |
| 6600405 | 7269258 | 1545451 | microtubule associated monooxygenase, calponin and LIM domain containing 3                                                  | Mical3 | 362427 | 1,19 | up   |
| 6630537 | 7269258 | 1545447 | microtubule associated monooxygenase, calponin and LIM domain containing 3                                                  | Mical3 | 362427 | 1,04 | down |
| 6640594 | 7269258 | 1545454 | microtubule associated monooxygenase, calponin and LIM domain containing 3                                                  | Mical3 | 362427 | 1,99 | up   |
| 6716975 | 7269258 | 1545447 | microtubule associated monooxygenase, calponin and LIM domain containing 3                                                  | Mical3 | 362427 | 1,06 | down |
| 6717502 | 7269258 | 1545453 | microtubule associated monooxygenase, calponin and LIM domain containing 3                                                  | Mical3 | 362427 | 1,64 | down |
| 5624204 | 7355552 | 1758774 | microtubule-associated protein 2                                                                                            | Map2   | 25595  | 1,13 | down |
| 5720084 | 7355552 | 1758775 | microtubule-associated protein 2                                                                                            | Map2   | 25595  | 1,04 | up   |
| 5720857 | 7355552 | 1758776 | microtubule-associated protein 2                                                                                            | Map2   | 25595  | 1,53 | down |
| 5732759 | 7355552 | 1758771 | microtubule-associated protein 2                                                                                            | Map2   | 25595  | 1,57 | up   |
| 5775358 | 7355552 | 1758782 | microtubule-associated protein 2                                                                                            | Map2   | 25595  | 1,03 | down |
| 5786355 | 7355552 | 1758770 | microtubule-associated protein 2                                                                                            | Map2   | 25595  | 1,75 | up   |
| 5853125 | 7355552 | 1758778 | microtubule-associated protein 2                                                                                            | Map2   | 25595  | 1,01 | down |
| 6050102 | 7355552 | 1758774 | microtubule-associated protein 2                                                                                            | Map2   | 25595  | 1,43 | down |
| 6085930 | 7355552 | 1758769 | microtubule-associated protein 2                                                                                            | Map2   | 25595  | 2,19 | up   |
| 6102156 | 7355552 | 1758777 | microtubule-associated protein 2                                                                                            | Map2   | 25595  | 1,06 | down |
| 6167937 | 7355552 | 1758779 | microtubule-associated protein 2                                                                                            | Map2   | 25595  | 1,25 | down |
| 6209380 | 7355552 | 1758783 | microtubule-associated protein 2                                                                                            | Map2   | 25595  | 1,04 | down |
| 6235843 | 7355552 | 1758773 | microtubule-associated protein 2                                                                                            | Map2   | 25595  | 1,01 | down |
| 6324804 | 7355552 | 1758781 | microtubule-associated protein 2                                                                                            | Map2   | 25595  | 1,05 | up   |
| 6445063 | 7355552 | 1758783 | microtubule-associated protein 2                                                                                            | Map2   | 25595  | 1,01 | down |
| 6546989 | 7355552 | 1758772 | microtubule-associated protein 2                                                                                            | Map2   | 25595  | 1,19 | down |
| 6573409 | 7355552 | 1758778 | microtubule-associated protein 2                                                                                            | Map2   | 25595  | 2,30 | up   |
| 6625718 | 7355552 | 1758780 | microtubule-associated protein 2                                                                                            | Map2   | 25595  | 1,00 | up   |
| 6732301 | 7355552 | 1758771 | microtubule-associated protein 2                                                                                            | Map2   | 25595  | 1,71 | up   |
| 5632153 | 7167823 | 1293894 | mindbomb homolog 1 (Drosophila)                                                                                             | Mib1   | 307594 | 1,16 | up   |
| 5639410 | 7167823 | 1293872 | mindbomb homolog 1 (Drosophila)                                                                                             | Mib1   | 307594 | 1,21 | up   |
| 5710130 | 7167823 | 1293888 | mindbomb homolog 1 (Drosophila)                                                                                             | Mib1   | 307594 | 1,03 | down |
| 5725625 | 7167823 | 1293885 | mindbomb homolog 1 (Drosophila)                                                                                             | Mib1   | 307594 | 1,06 | up   |
| 5757604 | 7167823 | 1293875 | mindbomb homolog 1 (Drosophila)                                                                                             | Mib1   | 307594 | 1,35 | down |
| 5759164 | 7167823 | 1293868 | mindbomb homolog 1 (Drosophila)                                                                                             | Mib1   | 307594 | 1,20 | down |
| 5816914 | 7167823 | 1293883 | mindbomb homolog 1 (Drosophila)                                                                                             | Mib1   | 307594 | 1,09 | down |
| 5848616 | 7167823 | 1293889 | mindbomb homolog 1 (Drosophila)                                                                                             | Mib1   | 307594 | 1,08 | up   |
| 5896783 | 7167823 | 1293882 | mindbomb homolog 1 (Drosophila)                                                                                             | Mib1   | 307594 | 1,12 | down |
| 5934944 | 7167823 | 1293892 | mindbomb homolog 1 (Drosophila)                                                                                             | Mib1   | 307594 | 1,27 | up   |

|         |         |         |                                                 |       |        |      |      |
|---------|---------|---------|-------------------------------------------------|-------|--------|------|------|
| 5937411 | 7167823 | 1293863 | mindbomb homolog 1 (Drosophila)                 | Mib1  | 307594 | 1,04 | down |
| 5948002 | 7167823 | 1293888 | mindbomb homolog 1 (Drosophila)                 | Mib1  | 307594 | 1,24 | down |
| 6045540 | 7167823 | 1293874 | mindbomb homolog 1 (Drosophila)                 | Mib1  | 307594 | 1,28 | down |
| 6049932 | 7167823 | 1293890 | mindbomb homolog 1 (Drosophila)                 | Mib1  | 307594 | 1,48 | up   |
| 6102899 | 7167823 | 1293867 | mindbomb homolog 1 (Drosophila)                 | Mib1  | 307594 | 1,09 | up   |
| 6223192 | 7167823 | 1293873 | mindbomb homolog 1 (Drosophila)                 | Mib1  | 307594 | 1,15 | down |
| 6265415 | 7167823 | 1293876 | mindbomb homolog 1 (Drosophila)                 | Mib1  | 307594 | 1,17 | up   |
| 6301405 | 7167823 | 1293877 | mindbomb homolog 1 (Drosophila)                 | Mib1  | 307594 | 1,02 | down |
| 6302957 | 7167823 | 1293885 | mindbomb homolog 1 (Drosophila)                 | Mib1  | 307594 | 1,05 | down |
| 6374644 | 7167823 | 1293869 | mindbomb homolog 1 (Drosophila)                 | Mib1  | 307594 | 1,35 | up   |
| 6549353 | 7167823 | 1293877 | mindbomb homolog 1 (Drosophila)                 | Mib1  | 307594 | 1,11 | down |
| 6606959 | 7167823 | 1293891 | mindbomb homolog 1 (Drosophila)                 | Mib1  | 307594 | 1,10 | up   |
| 6638582 | 7167823 | 1293879 | mindbomb homolog 1 (Drosophila)                 | Mib1  | 307594 | 1,19 | down |
| 6724620 | 7167823 | 1293871 | mindbomb homolog 1 (Drosophila)                 | Mib1  | 307594 | 1,06 | down |
| 6741657 | 7167823 | 1293863 | mindbomb homolog 1 (Drosophila)                 | Mib1  | 307594 | 1,74 | up   |
| 5642336 | 7160053 | 1275392 | minichromosome maintenance complex component 10 | Mcm10 | 307126 | 1,06 | down |
| 5679862 | 7160053 | 1275399 | minichromosome maintenance complex component 10 | Mcm10 | 307126 | 2,11 | down |
| 5704933 | 7160053 | 1275381 | minichromosome maintenance complex component 10 | Mcm10 | 307126 | 1,35 | down |
| 5768760 | 7160053 | 1275396 | minichromosome maintenance complex component 10 | Mcm10 | 307126 | 1,15 | down |
| 5804441 | 7160053 | 1275390 | minichromosome maintenance complex component 10 | Mcm10 | 307126 | 1,35 | up   |
| 5879035 | 7160053 | 1275392 | minichromosome maintenance complex component 10 | Mcm10 | 307126 | 1,15 | down |
| 5923720 | 7160053 | 1275389 | minichromosome maintenance complex component 10 | Mcm10 | 307126 | 1,03 | down |
| 6002980 | 7160053 | 1275379 | minichromosome maintenance complex component 10 | Mcm10 | 307126 | 1,36 | up   |
| 6036614 | 7160053 | 1275385 | minichromosome maintenance complex component 10 | Mcm10 | 307126 | 1,06 | up   |
| 6135151 | 7160053 | 1275395 | minichromosome maintenance complex component 10 | Mcm10 | 307126 | 1,38 | up   |
| 6215403 | 7160053 | 1275384 | minichromosome maintenance complex component 10 | Mcm10 | 307126 | 1,07 | up   |
| 6228999 | 7160053 | 1275381 | minichromosome maintenance complex component 10 | Mcm10 | 307126 | 1,28 | down |
| 6236758 | 7160053 | 1275393 | minichromosome maintenance complex component 10 | Mcm10 | 307126 | 1,01 | down |
| 6342492 | 7160053 | 1275380 | minichromosome maintenance complex component 10 | Mcm10 | 307126 | 2,67 | down |
| 6386602 | 7160053 | 1275386 | minichromosome maintenance complex component 10 | Mcm10 | 307126 | 1,10 | down |
| 6473226 | 7160053 | 1275381 | minichromosome maintenance complex component 10 | Mcm10 | 307126 | 1,35 | down |
| 6541620 | 7160053 | 1275391 | minichromosome maintenance complex component 10 | Mcm10 | 307126 | 1,74 | down |
| 6548781 | 7160053 | 1275397 | minichromosome maintenance complex component 10 | Mcm10 | 307126 | 1,28 | up   |
| 6595489 | 7160053 | 1275378 | minichromosome maintenance complex component 10 | Mcm10 | 307126 | 1,28 | down |
| 6639109 | 7160053 | 1275398 | minichromosome maintenance complex component 10 | Mcm10 | 307126 | 1,14 | down |
| 6658972 | 7160053 | 1275383 | minichromosome maintenance complex component 10 | Mcm10 | 307126 | 1,31 | down |
| 6686719 | 7160053 | 1275394 | minichromosome maintenance complex component 10 | Mcm10 | 307126 | 1,06 | up   |
| 6745249 | 7160053 | 1275400 | minichromosome maintenance complex component 10 | Mcm10 | 307126 | 1,36 | up   |
| 5673886 | 7178972 | 1322341 | minichromosome maintenance complex component 5  | Mcm5  | 291885 | 1,17 | up   |
| 5681374 | 7178972 | 1322349 | minichromosome maintenance complex component 5  | Mcm5  | 291885 | 1,13 | down |
| 5684386 | 7178972 | 1322345 | minichromosome maintenance complex component 5  | Mcm5  | 291885 | 1,16 | down |
| 5788239 | 7178972 | 1322350 | minichromosome maintenance complex component 5  | Mcm5  | 291885 | 1,54 | up   |
| 5791646 | 7178972 | 1322339 | minichromosome maintenance complex component 5  | Mcm5  | 291885 | 1,04 | up   |
| 5893427 | 7178972 | 1322336 | minichromosome maintenance complex component 5  | Mcm5  | 291885 | 1,34 | up   |
| 5918104 | 7178972 | 1322335 | minichromosome maintenance complex component 5  | Mcm5  | 291885 | 1,11 | up   |
| 5946397 | 7178972 | 1322334 | minichromosome maintenance complex component 5  | Mcm5  | 291885 | 1,06 | up   |
| 6098158 | 7178972 | 1322338 | minichromosome maintenance complex component 5  | Mcm5  | 291885 | 1,04 | up   |
| 6126469 | 7178972 | 1322333 | minichromosome maintenance complex component 5  | Mcm5  | 291885 | 1,08 | up   |
| 6241403 | 7178972 | 1322342 | minichromosome maintenance complex component 5  | Mcm5  | 291885 | 1,12 | up   |
| 6415921 | 7178972 | 1322343 | minichromosome maintenance complex component 5  | Mcm5  | 291885 | 1,33 | down |
| 6488743 | 7178972 | 1322337 | minichromosome maintenance complex component 5  | Mcm5  | 291885 | 1,61 | up   |
| 6514889 | 7178972 | 1322333 | minichromosome maintenance complex component 5  | Mcm5  | 291885 | 1,19 | up   |
| 6526376 | 7178972 | 1322344 | minichromosome maintenance complex component 5  | Mcm5  | 291885 | 1,43 | up   |
| 6528684 | 7178972 | 1322350 | minichromosome maintenance complex component 5  | Mcm5  | 291885 | 1,20 | up   |
| 6536967 | 7178972 | 1322347 | minichromosome maintenance complex component 5  | Mcm5  | 291885 | 2,12 | down |
| 6573537 | 7178972 | 1322340 | minichromosome maintenance complex component 5  | Mcm5  | 291885 | 1,30 | down |

|         |         |         |                                                                      |        |        |      |      |
|---------|---------|---------|----------------------------------------------------------------------|--------|--------|------|------|
| 6586079 | 7178972 | 1322348 | minichromosome maintenance complex component 5                       | Mcm5   | 291885 | 1,09 | up   |
| 6716000 | 7178972 | 1322346 | minichromosome maintenance complex component 5                       | Mcm5   | 291885 | 1,30 | up   |
| 5719226 | 7210713 | 1400748 | misato homolog 1 (Drosophila)                                        | Msto1  | 295237 | 2,77 | down |
| 5731912 | 7210713 | 1400756 | misato homolog 1 (Drosophila)                                        | Msto1  | 295237 | 1,02 | up   |
| 5737711 | 7210713 | 1400750 | misato homolog 1 (Drosophila)                                        | Msto1  | 295237 | 1,17 | up   |
| 5901916 | 7210713 | 1400757 | misato homolog 1 (Drosophila)                                        | Msto1  | 295237 | 1,62 | up   |
| 5915695 | 7210713 | 1400749 | misato homolog 1 (Drosophila)                                        | Msto1  | 295237 | 1,39 | up   |
| 5944287 | 7210713 | 1400758 | misato homolog 1 (Drosophila)                                        | Msto1  | 295237 | 1,34 | down |
| 5953729 | 7210713 | 1400747 | misato homolog 1 (Drosophila)                                        | Msto1  | 295237 | 1,48 | up   |
| 6254835 | 7210713 | 1400753 | misato homolog 1 (Drosophila)                                        | Msto1  | 295237 | 1,09 | up   |
| 6405129 | 7210713 | 1400753 | misato homolog 1 (Drosophila)                                        | Msto1  | 295237 | 1,02 | down |
| 6422226 | 7210713 | 1400753 | misato homolog 1 (Drosophila)                                        | Msto1  | 295237 | 1,30 | down |
| 6434333 | 7210713 | 1400754 | misato homolog 1 (Drosophila)                                        | Msto1  | 295237 | 1,21 | up   |
| 6460335 | 7210713 | 1400754 | misato homolog 1 (Drosophila)                                        | Msto1  | 295237 | 1,14 | down |
| 6579254 | 7210713 | 1400755 | misato homolog 1 (Drosophila)                                        | Msto1  | 295237 | 1,74 | down |
| 6619931 | 7210713 | 1400747 | misato homolog 1 (Drosophila)                                        | Msto1  | 295237 | 1,19 | up   |
| 6722361 | 7210713 | 1400758 | misato homolog 1 (Drosophila)                                        | Msto1  | 295237 | 1,60 | up   |
| 6743938 | 7210713 | 1400751 | misato homolog 1 (Drosophila)                                        | Msto1  | 295237 | 1,63 | down |
| 5643041 | 7361254 | 1772679 | MIT, microtubule interacting and transport, domain containing 1      | Mitd1  | 363219 | 1,45 | down |
| 5699463 | 7361254 | 1772685 | MIT, microtubule interacting and transport, domain containing 1      | Mitd1  | 363219 | 1,90 | up   |
| 5766422 | 7361254 | 1772680 | MIT, microtubule interacting and transport, domain containing 1      | Mitd1  | 363219 | 1,38 | down |
| 5917467 | 7361254 | 1772681 | MIT, microtubule interacting and transport, domain containing 1      | Mitd1  | 363219 | 1,30 | up   |
| 6051730 | 7361254 | 1772684 | MIT, microtubule interacting and transport, domain containing 1      | Mitd1  | 363219 | 1,42 | up   |
| 6064021 | 7361254 | 1772683 | MIT, microtubule interacting and transport, domain containing 1      | Mitd1  | 363219 | 2,24 | down |
| 6134501 | 7361254 | 1772683 | MIT, microtubule interacting and transport, domain containing 1      | Mitd1  | 363219 | 1,37 | up   |
| 6300861 | 7361254 | 1772682 | MIT, microtubule interacting and transport, domain containing 1      | Mitd1  | 363219 | 1,40 | down |
| 6444475 | 7361254 | 1772686 | MIT, microtubule interacting and transport, domain containing 1      | Mitd1  | 363219 | 1,34 | down |
| 6509746 | 7361254 | 1772680 | MIT, microtubule interacting and transport, domain containing 1      | Mitd1  | 363219 | 1,16 | down |
| 5789230 | 7301669 | 1626045 | mitochondrial hepatocellular carcinoma-downregulated carrier protein | Hdmcp  | 299316 | 1,44 | down |
| 5849136 | 7301669 | 1626042 | mitochondrial hepatocellular carcinoma-downregulated carrier protein | Hdmcp  | 299316 | 2,56 | down |
| 5861848 | 7301669 | 1626045 | mitochondrial hepatocellular carcinoma-downregulated carrier protein | Hdmcp  | 299316 | 1,66 | up   |
| 6123112 | 7301669 | 1626043 | mitochondrial hepatocellular carcinoma-downregulated carrier protein | Hdmcp  | 299316 | 1,07 | up   |
| 6504511 | 7301669 | 1626044 | mitochondrial hepatocellular carcinoma-downregulated carrier protein | Hdmcp  | 299316 | 1,31 | up   |
| 6589781 | 7301669 | 1626046 | mitochondrial hepatocellular carcinoma-downregulated carrier protein | Hdmcp  | 299316 | 1,06 | down |
| 6617321 | 7301669 | 1626041 | mitochondrial hepatocellular carcinoma-downregulated carrier protein | Hdmcp  | 299316 | 1,59 | down |
| 6739746 | 7301669 | 1626047 | mitochondrial hepatocellular carcinoma-downregulated carrier protein | Hdmcp  | 299316 | 1,04 | down |
| 5872142 | 7068086 | 1051202 | mitochondrial ribosomal protein L55                                  | Mrpl55 | 287356 | 1,16 | down |
| 5921212 | 7068086 | 1051204 | mitochondrial ribosomal protein L55                                  | Mrpl55 | 287356 | 1,16 | up   |
| 5963875 | 7068086 | 1051197 | mitochondrial ribosomal protein L55                                  | Mrpl55 | 287356 | 1,02 | down |
| 6181664 | 7068086 | 1051207 | mitochondrial ribosomal protein L55                                  | Mrpl55 | 287356 | 1,15 | up   |
| 6437205 | 7068086 | 1051204 | mitochondrial ribosomal protein L55                                  | Mrpl55 | 287356 | 1,40 | down |
| 6440210 | 7068086 | 1051206 | mitochondrial ribosomal protein L55                                  | Mrpl55 | 287356 | 1,25 | down |
| 6532225 | 7068086 | 1051204 | mitochondrial ribosomal protein L55                                  | Mrpl55 | 287356 | 2,67 | up   |
| 5643422 | 7188829 | 1346650 | mitochondrial ribosomal protein S27                                  | Mrps27 | 361883 | 1,20 | up   |
| 6060035 | 7188829 | 1346653 | mitochondrial ribosomal protein S27                                  | Mrps27 | 361883 | 1,05 | up   |
| 6117824 | 7188829 | 1346652 | mitochondrial ribosomal protein S27                                  | Mrps27 | 361883 | 1,58 | up   |
| 6133239 | 7188829 | 1346651 | mitochondrial ribosomal protein S27                                  | Mrps27 | 361883 | 1,00 | up   |
| 6481158 | 7188829 | 1346657 | mitochondrial ribosomal protein S27                                  | Mrps27 | 361883 | 1,72 | down |
| 5730932 | 7152974 | 1257655 | mitochondrial ribosomal protein S31                                  | Mrps31 | 290850 | 1,11 | down |
| 5780709 | 7152974 | 1257662 | mitochondrial ribosomal protein S31                                  | Mrps31 | 290850 | 1,43 | down |
| 5810637 | 7152974 | 1257662 | mitochondrial ribosomal protein S31                                  | Mrps31 | 290850 | 1,01 | down |
| 5915680 | 7152974 | 1257656 | mitochondrial ribosomal protein S31                                  | Mrps31 | 290850 | 1,30 | up   |
| 6004728 | 7152974 | 1257662 | mitochondrial ribosomal protein S31                                  | Mrps31 | 290850 | 1,25 | down |
| 6069465 | 7152974 | 1257655 | mitochondrial ribosomal protein S31                                  | Mrps31 | 290850 | 1,31 | up   |
| 6072365 | 7152974 | 1257660 | mitochondrial ribosomal protein S31                                  | Mrps31 | 290850 | 1,11 | up   |
| 6179267 | 7152974 | 1257663 | mitochondrial ribosomal protein S31                                  | Mrps31 | 290850 | 1,32 | up   |



|         |         |         |                                                         |        |        |      |      |
|---------|---------|---------|---------------------------------------------------------|--------|--------|------|------|
| 6255341 | 7152974 | 1257663 | mitochondrial ribosomal protein S31                     | Mrps31 | 290850 | 1,11 | down |
| 6326259 | 7152974 | 1257663 | mitochondrial ribosomal protein S31                     | Mrps31 | 290850 | 1,22 | down |
| 6379275 | 7152974 | 1257654 | mitochondrial ribosomal protein S31                     | Mrps31 | 290850 | 1,30 | down |
| 6405239 | 7152974 | 1257661 | mitochondrial ribosomal protein S31                     | Mrps31 | 290850 | 1,04 | up   |
| 6740482 | 7152974 | 1257659 | mitochondrial ribosomal protein S31                     | Mrps31 | 290850 | 1,09 | up   |
| 5712783 | 7280049 | 1573125 | mitochondrial trans-2-enoyl-CoA reductase               | Mecr   | 29470  | 1,27 | up   |
| 5760226 | 7280049 | 1573129 | mitochondrial trans-2-enoyl-CoA reductase               | Mecr   | 29470  | 1,15 | down |
| 5777504 | 7280049 | 1573126 | mitochondrial trans-2-enoyl-CoA reductase               | Mecr   | 29470  | 1,56 | down |
| 6097252 | 7280049 | 1573127 | mitochondrial trans-2-enoyl-CoA reductase               | Mecr   | 29470  | 1,12 | down |
| 6143121 | 7280049 | 1573135 | mitochondrial trans-2-enoyl-CoA reductase               | Mecr   | 29470  | 1,29 | up   |
| 6236422 | 7280049 | 1573128 | mitochondrial trans-2-enoyl-CoA reductase               | Mecr   | 29470  | 1,03 | down |
| 6294915 | 7280049 | 1573130 | mitochondrial trans-2-enoyl-CoA reductase               | Mecr   | 29470  | 1,25 | down |
| 6422301 | 7280049 | 1573132 | mitochondrial trans-2-enoyl-CoA reductase               | Mecr   | 29470  | 2,43 | up   |
| 6443468 | 7280049 | 1573131 | mitochondrial trans-2-enoyl-CoA reductase               | Mecr   | 29470  | 1,11 | down |
| 6591507 | 7280049 | 1573134 | mitochondrial trans-2-enoyl-CoA reductase               | Mecr   | 29470  | 1,19 | up   |
| 6652750 | 7280049 | 1573133 | mitochondrial trans-2-enoyl-CoA reductase               | Mecr   | 29470  | 1,31 | down |
| 5643947 | 7030233 | 961158  | mitogen activated protein kinase kinase kinase kinase 1 | Map4k1 | 292763 | 1,23 | down |
| 5657591 | 7030233 | 961173  | mitogen activated protein kinase kinase kinase kinase 1 | Map4k1 | 292763 | 1,19 | up   |
| 5677788 | 7030233 | 961174  | mitogen activated protein kinase kinase kinase kinase 1 | Map4k1 | 292763 | 1,40 | up   |
| 5743685 | 7030233 | 961152  | mitogen activated protein kinase kinase kinase kinase 1 | Map4k1 | 292763 | 1,15 | down |
| 5756053 | 7030233 | 961178  | mitogen activated protein kinase kinase kinase kinase 1 | Map4k1 | 292763 | 1,48 | down |
| 5835043 | 7030233 | 961175  | mitogen activated protein kinase kinase kinase kinase 1 | Map4k1 | 292763 | 1,10 | up   |
| 5838269 | 7030233 | 961162  | mitogen activated protein kinase kinase kinase kinase 1 | Map4k1 | 292763 | 1,11 | down |
| 5891047 | 7030233 | 961175  | mitogen activated protein kinase kinase kinase kinase 1 | Map4k1 | 292763 | 1,41 | up   |
| 5900841 | 7030233 | 961167  | mitogen activated protein kinase kinase kinase kinase 1 | Map4k1 | 292763 | 1,94 | down |
| 5902366 | 7030233 | 961154  | mitogen activated protein kinase kinase kinase kinase 1 | Map4k1 | 292763 | 1,05 | up   |
| 5910371 | 7030233 | 961148  | mitogen activated protein kinase kinase kinase kinase 1 | Map4k1 | 292763 | 1,15 | up   |
| 5926383 | 7030233 | 961155  | mitogen activated protein kinase kinase kinase kinase 1 | Map4k1 | 292763 | 1,62 | down |
| 5934014 | 7030233 | 961166  | mitogen activated protein kinase kinase kinase kinase 1 | Map4k1 | 292763 | 1,04 | up   |
| 5989941 | 7030233 | 961146  | mitogen activated protein kinase kinase kinase kinase 1 | Map4k1 | 292763 | 1,02 | down |
| 6071151 | 7030233 | 961163  | mitogen activated protein kinase kinase kinase kinase 1 | Map4k1 | 292763 | 1,07 | up   |
| 6136520 | 7030233 | 961164  | mitogen activated protein kinase kinase kinase kinase 1 | Map4k1 | 292763 | 1,09 | up   |
| 6165878 | 7030233 | 961165  | mitogen activated protein kinase kinase kinase kinase 1 | Map4k1 | 292763 | 1,09 | up   |
| 6207224 | 7030233 | 961168  | mitogen activated protein kinase kinase kinase kinase 1 | Map4k1 | 292763 | 1,24 | up   |
| 6210359 | 7030233 | 961172  | mitogen activated protein kinase kinase kinase kinase 1 | Map4k1 | 292763 | 1,74 | down |
| 6252070 | 7030233 | 961150  | mitogen activated protein kinase kinase kinase kinase 1 | Map4k1 | 292763 | 1,18 | up   |
| 6277941 | 7030233 | 961171  | mitogen activated protein kinase kinase kinase kinase 1 | Map4k1 | 292763 | 2,40 | down |
| 6326544 | 7030233 | 961168  | mitogen activated protein kinase kinase kinase kinase 1 | Map4k1 | 292763 | 1,18 | up   |
| 6352218 | 7030233 | 961160  | mitogen activated protein kinase kinase kinase kinase 1 | Map4k1 | 292763 | 1,35 | down |
| 6353991 | 7030233 | 961161  | mitogen activated protein kinase kinase kinase kinase 1 | Map4k1 | 292763 | 1,05 | up   |
| 6408017 | 7030233 | 961159  | mitogen activated protein kinase kinase kinase kinase 1 | Map4k1 | 292763 | 1,32 | up   |
| 6455713 | 7030233 | 961156  | mitogen activated protein kinase kinase kinase kinase 1 | Map4k1 | 292763 | 1,11 | down |
| 6536465 | 7030233 | 961149  | mitogen activated protein kinase kinase kinase kinase 1 | Map4k1 | 292763 | 1,05 | down |
| 6564566 | 7030233 | 961169  | mitogen activated protein kinase kinase kinase kinase 1 | Map4k1 | 292763 | 1,17 | down |
| 6588103 | 7030233 | 961151  | mitogen activated protein kinase kinase kinase kinase 1 | Map4k1 | 292763 | 1,04 | down |
| 6601520 | 7030233 | 961153  | mitogen activated protein kinase kinase kinase kinase 1 | Map4k1 | 292763 | 1,09 | down |
| 6618439 | 7030233 | 961178  | mitogen activated protein kinase kinase kinase kinase 1 | Map4k1 | 292763 | 1,18 | up   |
| 6623200 | 7030233 | 961147  | mitogen activated protein kinase kinase kinase kinase 1 | Map4k1 | 292763 | 1,11 | down |
| 6629428 | 7030233 | 961165  | mitogen activated protein kinase kinase kinase kinase 1 | Map4k1 | 292763 | 2,42 | down |
| 6678975 | 7030233 | 961157  | mitogen activated protein kinase kinase kinase kinase 1 | Map4k1 | 292763 | 1,15 | down |
| 5650814 | 7330659 | 1697057 | mitogen-activated protein kinase 11                     | Mapk11 | 689314 | 1,46 | up   |
| 5688639 | 7330659 | 1697059 | mitogen-activated protein kinase 11                     | Mapk11 | 689314 | 1,02 | up   |
| 5708157 | 7330659 | 1697060 | mitogen-activated protein kinase 11                     | Mapk11 | 689314 | 2,12 | up   |
| 5815501 | 7330659 | 1697053 | mitogen-activated protein kinase 11                     | Mapk11 | 689314 | 1,29 | down |
| 5864520 | 7330659 | 1697062 | mitogen-activated protein kinase 11                     | Mapk11 | 689314 | 1,04 | down |
| 5884946 | 7330659 | 1697056 | mitogen-activated protein kinase 11                     | Mapk11 | 689314 | 1,07 | up   |

|         |         |         |                                     |        |        |      |      |
|---------|---------|---------|-------------------------------------|--------|--------|------|------|
| 5895124 | 7330659 | 1697051 | mitogen-activated protein kinase 11 | Mapk11 | 689314 | 1,01 | up   |
| 5933006 | 7330659 | 1697057 | mitogen-activated protein kinase 11 | Mapk11 | 689314 | 1,32 | down |
| 6040230 | 7330659 | 1697061 | mitogen-activated protein kinase 11 | Mapk11 | 689314 | 1,03 | down |
| 6116486 | 7330659 | 1697054 | mitogen-activated protein kinase 11 | Mapk11 | 689314 | 1,30 | down |
| 6186495 | 7330659 | 1697051 | mitogen-activated protein kinase 11 | Mapk11 | 689314 | 1,17 | down |
| 6315107 | 7330659 | 1697052 | mitogen-activated protein kinase 11 | Mapk11 | 689314 | 1,20 | down |
| 6339395 | 7330659 | 1697060 | mitogen-activated protein kinase 11 | Mapk11 | 689314 | 1,07 | up   |
| 6422246 | 7330659 | 1697058 | mitogen-activated protein kinase 11 | Mapk11 | 689314 | 1,14 | up   |
| 6589581 | 7330659 | 1697055 | mitogen-activated protein kinase 11 | Mapk11 | 689314 | 1,10 | up   |
| 6612857 | 7330659 | 1697058 | mitogen-activated protein kinase 11 | Mapk11 | 689314 | 1,12 | up   |
| 6701070 | 7330659 | 1697051 | mitogen-activated protein kinase 11 | Mapk11 | 689314 | 1,06 | down |
| 5738486 | 7330647 | 1697030 | mitogen-activated protein kinase 12 | Mapk12 | 60352  | 1,45 | up   |
| 5879250 | 7330647 | 1697037 | mitogen-activated protein kinase 12 | Mapk12 | 60352  | 2,17 | down |
| 5895535 | 7330647 | 1697037 | mitogen-activated protein kinase 12 | Mapk12 | 60352  | 1,95 | down |
| 5980264 | 7330647 | 1697026 | mitogen-activated protein kinase 12 | Mapk12 | 60352  | 1,12 | up   |
| 6028042 | 7330647 | 1697036 | mitogen-activated protein kinase 12 | Mapk12 | 60352  | 1,29 | up   |
| 6045709 | 7330647 | 1697035 | mitogen-activated protein kinase 12 | Mapk12 | 60352  | 1,04 | down |
| 6078256 | 7330647 | 1697027 | mitogen-activated protein kinase 12 | Mapk12 | 60352  | 1,18 | up   |
| 6227011 | 7330647 | 1697033 | mitogen-activated protein kinase 12 | Mapk12 | 60352  | 1,60 | down |
| 6271936 | 7330647 | 1697029 | mitogen-activated protein kinase 12 | Mapk12 | 60352  | 1,06 | up   |
| 6313536 | 7330647 | 1697028 | mitogen-activated protein kinase 12 | Mapk12 | 60352  | 1,16 | down |
| 6433960 | 7330647 | 1697034 | mitogen-activated protein kinase 12 | Mapk12 | 60352  | 1,06 | up   |
| 6523491 | 7330647 | 1697032 | mitogen-activated protein kinase 12 | Mapk12 | 60352  | 1,50 | down |
| 6715701 | 7330647 | 1697031 | mitogen-activated protein kinase 12 | Mapk12 | 60352  | 1,12 | down |
| 5691706 | 7318156 | 1668147 | mitogen-activated protein kinase 15 | Mapk15 | 286997 | 1,27 | up   |
| 5743842 | 7318156 | 1668137 | mitogen-activated protein kinase 15 | Mapk15 | 286997 | 1,03 | down |
| 5876215 | 7318156 | 1668136 | mitogen-activated protein kinase 15 | Mapk15 | 286997 | 1,80 | up   |
| 5886262 | 7318156 | 1668139 | mitogen-activated protein kinase 15 | Mapk15 | 286997 | 1,18 | up   |
| 5958811 | 7318156 | 1668143 | mitogen-activated protein kinase 15 | Mapk15 | 286997 | 1,81 | down |
| 5991908 | 7318156 | 1668138 | mitogen-activated protein kinase 15 | Mapk15 | 286997 | 1,02 | up   |
| 5997028 | 7318156 | 1668142 | mitogen-activated protein kinase 15 | Mapk15 | 286997 | 1,54 | down |
| 6078067 | 7318156 | 1668142 | mitogen-activated protein kinase 15 | Mapk15 | 286997 | 1,15 | down |
| 6144228 | 7318156 | 1668147 | mitogen-activated protein kinase 15 | Mapk15 | 286997 | 1,00 | up   |
| 6156227 | 7318156 | 1668148 | mitogen-activated protein kinase 15 | Mapk15 | 286997 | 2,06 | down |
| 6247343 | 7318156 | 1668134 | mitogen-activated protein kinase 15 | Mapk15 | 286997 | 1,08 | up   |
| 6524044 | 7318156 | 1668145 | mitogen-activated protein kinase 15 | Mapk15 | 286997 | 1,41 | up   |
| 6591732 | 7318156 | 1668135 | mitogen-activated protein kinase 15 | Mapk15 | 286997 | 1,37 | up   |
| 6596927 | 7318156 | 1668141 | mitogen-activated protein kinase 15 | Mapk15 | 286997 | 1,85 | down |
| 6674302 | 7318156 | 1668140 | mitogen-activated protein kinase 15 | Mapk15 | 286997 | 1,33 | down |
| 6692378 | 7318156 | 1668144 | mitogen-activated protein kinase 15 | Mapk15 | 286997 | 1,25 | down |
| 6743816 | 7318156 | 1668146 | mitogen-activated protein kinase 15 | Mapk15 | 286997 | 1,01 | down |
| 5834292 | 7177180 | 1317778 | mitogen-activated protein kinase 4  | Mapk4  | 54268  | 1,08 | up   |
| 5847014 | 7177180 | 1317769 | mitogen-activated protein kinase 4  | Mapk4  | 54268  | 1,42 | down |
| 6089309 | 7177180 | 1317770 | mitogen-activated protein kinase 4  | Mapk4  | 54268  | 2,21 | up   |
| 5748562 | 7078273 | 1075819 | mitogen-activated protein kinase 7  | Mapk7  | 114509 | 1,24 | down |
| 6216364 | 7078273 | 1075819 | mitogen-activated protein kinase 7  | Mapk7  | 114509 | 1,35 | up   |
| 6319071 | 7078273 | 1075820 | mitogen-activated protein kinase 7  | Mapk7  | 114509 | 2,34 | up   |
| 6370439 | 7078273 | 1075820 | mitogen-activated protein kinase 7  | Mapk7  | 114509 | 1,01 | down |
| 6405203 | 7078273 | 1075820 | mitogen-activated protein kinase 7  | Mapk7  | 114509 | 1,02 | down |
| 6444012 | 7078273 | 1075819 | mitogen-activated protein kinase 7  | Mapk7  | 114509 | 1,14 | down |
| 6463930 | 7078273 | 1075819 | mitogen-activated protein kinase 7  | Mapk7  | 114509 | 1,63 | down |
| 6489240 | 7078273 | 1075819 | mitogen-activated protein kinase 7  | Mapk7  | 114509 | 1,59 | up   |
| 6706274 | 7078273 | 1075818 | mitogen-activated protein kinase 7  | Mapk7  | 114509 | 1,64 | down |
| 5673932 | 7149008 | 1248599 | mitogen-activated protein kinase 8  | Mapk8  | 116554 | 1,01 | down |
| 5697557 | 7149008 | 1248595 | mitogen-activated protein kinase 8  | Mapk8  | 116554 | 1,51 | down |
| 5697710 | 7149008 | 1248608 | mitogen-activated protein kinase 8  | Mapk8  | 116554 | 1,45 | up   |

|         |         |         |                                                             |          |        |      |      |
|---------|---------|---------|-------------------------------------------------------------|----------|--------|------|------|
| 5735680 | 7149008 | 1248616 | mitogen-activated protein kinase 8                          | Mapk8    | 116554 | 1,02 | down |
| 5861845 | 7149008 | 1248598 | mitogen-activated protein kinase 8                          | Mapk8    | 116554 | 1,45 | up   |
| 5967457 | 7149008 | 1248601 | mitogen-activated protein kinase 8                          | Mapk8    | 116554 | 2,67 | up   |
| 5995482 | 7149008 | 1248598 | mitogen-activated protein kinase 8                          | Mapk8    | 116554 | 1,09 | up   |
| 6004975 | 7149008 | 1248595 | mitogen-activated protein kinase 8                          | Mapk8    | 116554 | 1,25 | up   |
| 6235230 | 7149008 | 1248602 | mitogen-activated protein kinase 8                          | Mapk8    | 116554 | 1,21 | down |
| 6243867 | 7149008 | 1248607 | mitogen-activated protein kinase 8                          | Mapk8    | 116554 | 1,10 | up   |
| 6355612 | 7149008 | 1248596 | mitogen-activated protein kinase 8                          | Mapk8    | 116554 | 1,24 | down |
| 6372791 | 7149008 | 1248608 | mitogen-activated protein kinase 8                          | Mapk8    | 116554 | 1,10 | down |
| 6388266 | 7149008 | 1248599 | mitogen-activated protein kinase 8                          | Mapk8    | 116554 | 1,35 | down |
| 6447486 | 7149008 | 1248604 | mitogen-activated protein kinase 8                          | Mapk8    | 116554 | 1,17 | up   |
| 6688725 | 7149008 | 1248603 | mitogen-activated protein kinase 8                          | Mapk8    | 116554 | 1,16 | up   |
| 5628472 | 7083160 | 1086531 | mitogen-activated protein kinase kinase kinase 14           | Map3k14  | 360640 | 1,79 | down |
| 5635753 | 7083160 | 1086531 | mitogen-activated protein kinase kinase kinase 14           | Map3k14  | 360640 | 1,28 | down |
| 5690396 | 7083160 | 1086535 | mitogen-activated protein kinase kinase kinase 14           | Map3k14  | 360640 | 1,21 | down |
| 5766625 | 7083160 | 1086532 | mitogen-activated protein kinase kinase kinase 14           | Map3k14  | 360640 | 1,14 | up   |
| 5888968 | 7083160 | 1086551 | mitogen-activated protein kinase kinase kinase 14           | Map3k14  | 360640 | 1,51 | up   |
| 5900830 | 7083160 | 1086548 | mitogen-activated protein kinase kinase kinase 14           | Map3k14  | 360640 | 1,14 | down |
| 5903098 | 7083160 | 1086549 | mitogen-activated protein kinase kinase kinase 14           | Map3k14  | 360640 | 1,22 | up   |
| 5948683 | 7083160 | 1086542 | mitogen-activated protein kinase kinase kinase 14           | Map3k14  | 360640 | 1,03 | up   |
| 5966661 | 7083160 | 1086537 | mitogen-activated protein kinase kinase kinase 14           | Map3k14  | 360640 | 1,57 | down |
| 5975556 | 7083160 | 1086550 | mitogen-activated protein kinase kinase kinase 14           | Map3k14  | 360640 | 1,42 | up   |
| 6097844 | 7083160 | 1086532 | mitogen-activated protein kinase kinase kinase 14           | Map3k14  | 360640 | 1,04 | down |
| 6167760 | 7083160 | 1086544 | mitogen-activated protein kinase kinase kinase 14           | Map3k14  | 360640 | 1,57 | up   |
| 6284325 | 7083160 | 1086538 | mitogen-activated protein kinase kinase kinase 14           | Map3k14  | 360640 | 1,24 | up   |
| 6294672 | 7083160 | 1086552 | mitogen-activated protein kinase kinase kinase 14           | Map3k14  | 360640 | 1,50 | up   |
| 6326282 | 7083160 | 1086543 | mitogen-activated protein kinase kinase kinase 14           | Map3k14  | 360640 | 1,06 | up   |
| 6459274 | 7083160 | 1086540 | mitogen-activated protein kinase kinase kinase 14           | Map3k14  | 360640 | 1,31 | up   |
| 6506525 | 7083160 | 1086536 | mitogen-activated protein kinase kinase kinase 14           | Map3k14  | 360640 | 1,71 | up   |
| 6527231 | 7083160 | 1086539 | mitogen-activated protein kinase kinase kinase 14           | Map3k14  | 360640 | 1,02 | up   |
| 6608126 | 7083160 | 1086533 | mitogen-activated protein kinase kinase kinase 14           | Map3k14  | 360640 | 1,31 | down |
| 6649725 | 7083160 | 1086531 | mitogen-activated protein kinase kinase kinase 14           | Map3k14  | 360640 | 1,10 | down |
| 6656541 | 7083160 | 1086556 | mitogen-activated protein kinase kinase kinase 14           | Map3k14  | 360640 | 1,37 | down |
| 5645309 | 7349824 | 1744690 | mitogen-activated protein kinase-activated protein kinase 3 | Mapkapk3 | 315994 | 2,13 | up   |
| 5670819 | 7349824 | 1744690 | mitogen-activated protein kinase-activated protein kinase 3 | Mapkapk3 | 315994 | 1,56 | down |
| 5814427 | 7349824 | 1744687 | mitogen-activated protein kinase-activated protein kinase 3 | Mapkapk3 | 315994 | 1,32 | up   |
| 5830661 | 7349824 | 1744679 | mitogen-activated protein kinase-activated protein kinase 3 | Mapkapk3 | 315994 | 1,25 | down |
| 5867857 | 7349824 | 1744691 | mitogen-activated protein kinase-activated protein kinase 3 | Mapkapk3 | 315994 | 1,16 | up   |
| 5888355 | 7349824 | 1744683 | mitogen-activated protein kinase-activated protein kinase 3 | Mapkapk3 | 315994 | 1,35 | up   |
| 5925818 | 7349824 | 1744689 | mitogen-activated protein kinase-activated protein kinase 3 | Mapkapk3 | 315994 | 1,25 | up   |
| 5932878 | 7349824 | 1744686 | mitogen-activated protein kinase-activated protein kinase 3 | Mapkapk3 | 315994 | 1,04 | up   |
| 5961790 | 7349824 | 1744684 | mitogen-activated protein kinase-activated protein kinase 3 | Mapkapk3 | 315994 | 1,31 | up   |
| 5981603 | 7349824 | 1744683 | mitogen-activated protein kinase-activated protein kinase 3 | Mapkapk3 | 315994 | 1,05 | down |
| 6093397 | 7349824 | 1744681 | mitogen-activated protein kinase-activated protein kinase 3 | Mapkapk3 | 315994 | 1,23 | down |
| 6225335 | 7349824 | 1744685 | mitogen-activated protein kinase-activated protein kinase 3 | Mapkapk3 | 315994 | 1,83 | down |
| 6271753 | 7349824 | 1744688 | mitogen-activated protein kinase-activated protein kinase 3 | Mapkapk3 | 315994 | 1,59 | up   |
| 6455659 | 7349824 | 1744689 | mitogen-activated protein kinase-activated protein kinase 3 | Mapkapk3 | 315994 | 1,40 | down |
| 6510710 | 7349824 | 1744679 | mitogen-activated protein kinase-activated protein kinase 3 | Mapkapk3 | 315994 | 1,27 | down |
| 6622713 | 7349824 | 1744682 | mitogen-activated protein kinase-activated protein kinase 3 | Mapkapk3 | 315994 | 1,08 | down |
| 6635601 | 7349824 | 1744680 | mitogen-activated protein kinase-activated protein kinase 3 | Mapkapk3 | 315994 | 1,02 | down |
| 5672460 | 7098451 | 1123813 | mitogen-activated protein kinase-activated protein kinase 5 | Mapkapk5 | 498183 | 1,21 | down |
| 5689401 | 7098451 | 1123819 | mitogen-activated protein kinase-activated protein kinase 5 | Mapkapk5 | 498183 | 1,17 | down |
| 5789158 | 7098451 | 1123823 | mitogen-activated protein kinase-activated protein kinase 5 | Mapkapk5 | 498183 | 1,72 | down |
| 5945799 | 7098451 | 1123817 | mitogen-activated protein kinase-activated protein kinase 5 | Mapkapk5 | 498183 | 1,25 | up   |
| 5953768 | 7098451 | 1123816 | mitogen-activated protein kinase-activated protein kinase 5 | Mapkapk5 | 498183 | 1,18 | down |
| 6080692 | 7098451 | 1123815 | mitogen-activated protein kinase-activated protein kinase 5 | Mapkapk5 | 498183 | 1,31 | up   |

|         |         |         |                                                             |          |        |      |      |
|---------|---------|---------|-------------------------------------------------------------|----------|--------|------|------|
| 6124758 | 7098451 | 1123823 | mitogen-activated protein kinase-activated protein kinase 5 | Mapkapk5 | 498183 | 1,13 | down |
| 6167369 | 7098451 | 1123823 | mitogen-activated protein kinase-activated protein kinase 5 | Mapkapk5 | 498183 | 1,05 | up   |
| 6187171 | 7098451 | 1123818 | mitogen-activated protein kinase-activated protein kinase 5 | Mapkapk5 | 498183 | 1,35 | up   |
| 6271893 | 7098451 | 1123814 | mitogen-activated protein kinase-activated protein kinase 5 | Mapkapk5 | 498183 | 1,10 | up   |
| 6324174 | 7098451 | 1123820 | mitogen-activated protein kinase-activated protein kinase 5 | Mapkapk5 | 498183 | 1,12 | up   |
| 6509968 | 7098451 | 1123812 | mitogen-activated protein kinase-activated protein kinase 5 | Mapkapk5 | 498183 | 1,15 | down |
| 6565038 | 7098451 | 1123822 | mitogen-activated protein kinase-activated protein kinase 5 | Mapkapk5 | 498183 | 3,99 | down |
| 5661957 | 7284934 | 1584887 | MOB1, Mps One Binder kinase activator-like 2B (yeast)       | Mobkl2b  | 366352 | 1,51 | down |
| 5668744 | 7284934 | 1584915 | MOB1, Mps One Binder kinase activator-like 2B (yeast)       | Mobkl2b  | 366352 | 1,33 | up   |
| 5821527 | 7284934 | 1584915 | MOB1, Mps One Binder kinase activator-like 2B (yeast)       | Mobkl2b  | 366352 | 1,03 | up   |
| 5954642 | 7284934 | 1584888 | MOB1, Mps One Binder kinase activator-like 2B (yeast)       | Mobkl2b  | 366352 | 1,24 | up   |
| 6022478 | 7284934 | 1584887 | MOB1, Mps One Binder kinase activator-like 2B (yeast)       | Mobkl2b  | 366352 | 1,28 | down |
| 6223501 | 7284934 | 1584916 | MOB1, Mps One Binder kinase activator-like 2B (yeast)       | Mobkl2b  | 366352 | 1,16 | down |
| 6287458 | 7284934 | 1584886 | MOB1, Mps One Binder kinase activator-like 2B (yeast)       | Mobkl2b  | 366352 | 1,14 | up   |
| 6422887 | 7284934 | 1584902 | MOB1, Mps One Binder kinase activator-like 2B (yeast)       | Mobkl2b  | 366352 | 1,36 | up   |
| 6564814 | 7284934 | 1584885 | MOB1, Mps One Binder kinase activator-like 2B (yeast)       | Mobkl2b  | 366352 | 1,22 | up   |
| 5906038 | 7375727 | 1810877 | moesin                                                      | Msn      | 81521  | 1,20 | down |
| 5911591 | 7375727 | 1810882 | moesin                                                      | Msn      | 81521  | 1,24 | down |
| 5943463 | 7375727 | 1810878 | moesin                                                      | Msn      | 81521  | 1,53 | up   |
| 5944173 | 7375727 | 1810874 | moesin                                                      | Msn      | 81521  | 1,10 | up   |
| 5961844 | 7375727 | 1810883 | moesin                                                      | Msn      | 81521  | 2,01 | up   |
| 5988620 | 7375727 | 1810875 | moesin                                                      | Msn      | 81521  | 1,10 | down |
| 6088851 | 7375727 | 1810873 | moesin                                                      | Msn      | 81521  | 1,29 | up   |
| 6287335 | 7375727 | 1810880 | moesin                                                      | Msn      | 81521  | 1,13 | down |
| 6381874 | 7375727 | 1810876 | moesin                                                      | Msn      | 81521  | 1,38 | up   |
| 6418148 | 7375727 | 1810872 | moesin                                                      | Msn      | 81521  | 1,25 | down |
| 6600896 | 7375727 | 1810879 | moesin                                                      | Msn      | 81521  | 1,12 | down |
| 5678020 | 7168519 | 1295873 | molybdenum cofactor sulfurase                               | Mocos    | 361300 | 1,64 | up   |
| 5708671 | 7168519 | 1295872 | molybdenum cofactor sulfurase                               | Mocos    | 361300 | 1,01 | down |
| 5777987 | 7168519 | 1295864 | molybdenum cofactor sulfurase                               | Mocos    | 361300 | 1,30 | down |
| 5811089 | 7168519 | 1295875 | molybdenum cofactor sulfurase                               | Mocos    | 361300 | 1,72 | down |
| 5828870 | 7168519 | 1295876 | molybdenum cofactor sulfurase                               | Mocos    | 361300 | 1,06 | up   |
| 5878552 | 7168519 | 1295871 | molybdenum cofactor sulfurase                               | Mocos    | 361300 | 1,36 | up   |
| 5943951 | 7168519 | 1295870 | molybdenum cofactor sulfurase                               | Mocos    | 361300 | 1,05 | up   |
| 5953429 | 7168519 | 1295874 | molybdenum cofactor sulfurase                               | Mocos    | 361300 | 1,10 | up   |
| 5961367 | 7168519 | 1295885 | molybdenum cofactor sulfurase                               | Mocos    | 361300 | 1,04 | down |
| 6037005 | 7168519 | 1295874 | molybdenum cofactor sulfurase                               | Mocos    | 361300 | 1,10 | up   |
| 6190661 | 7168519 | 1295868 | molybdenum cofactor sulfurase                               | Mocos    | 361300 | 1,24 | up   |
| 6210258 | 7168519 | 1295883 | molybdenum cofactor sulfurase                               | Mocos    | 361300 | 1,03 | down |
| 6225481 | 7168519 | 1295864 | molybdenum cofactor sulfurase                               | Mocos    | 361300 | 1,18 | down |
| 6294641 | 7168519 | 1295866 | molybdenum cofactor sulfurase                               | Mocos    | 361300 | 1,12 | up   |
| 6322790 | 7168519 | 1295867 | molybdenum cofactor sulfurase                               | Mocos    | 361300 | 1,14 | down |
| 6381101 | 7168519 | 1295884 | molybdenum cofactor sulfurase                               | Mocos    | 361300 | 1,26 | up   |
| 6411246 | 7168519 | 1295869 | molybdenum cofactor sulfurase                               | Mocos    | 361300 | 1,11 | up   |
| 6417891 | 7168519 | 1295874 | molybdenum cofactor sulfurase                               | Mocos    | 361300 | 2,28 | up   |
| 6452526 | 7168519 | 1295864 | molybdenum cofactor sulfurase                               | Mocos    | 361300 | 1,08 | down |
| 6453341 | 7168519 | 1295877 | molybdenum cofactor sulfurase                               | Mocos    | 361300 | 1,42 | up   |
| 6605663 | 7168519 | 1295884 | molybdenum cofactor sulfurase                               | Mocos    | 361300 | 1,68 | down |
| 6695886 | 7168519 | 1295879 | molybdenum cofactor sulfurase                               | Mocos    | 361300 | 1,24 | down |
| 6713244 | 7168519 | 1295881 | molybdenum cofactor sulfurase                               | Mocos    | 361300 | 1,10 | up   |
| 5813108 | 7340258 | 1720737 | MON1 homolog A (yeast)                                      | Mon1a    | 315999 | 1,04 | up   |
| 5938119 | 7340258 | 1720743 | MON1 homolog A (yeast)                                      | Mon1a    | 315999 | 1,12 | up   |
| 5996769 | 7340258 | 1720741 | MON1 homolog A (yeast)                                      | Mon1a    | 315999 | 1,22 | down |
| 6050216 | 7340258 | 1720742 | MON1 homolog A (yeast)                                      | Mon1a    | 315999 | 1,57 | up   |
| 6089149 | 7340258 | 1720737 | MON1 homolog A (yeast)                                      | Mon1a    | 315999 | 2,02 | down |
| 6285024 | 7340258 | 1720743 | MON1 homolog A (yeast)                                      | Mon1a    | 315999 | 1,01 | down |

|         |         |         |                                   |          |        |      |      |
|---------|---------|---------|-----------------------------------|----------|--------|------|------|
| 6351358 | 7340258 | 1720743 | MON1 homolog A (yeast)            | Mon1a    | 315999 | 1,04 | up   |
| 6524395 | 7340258 | 1720743 | MON1 homolog A (yeast)            | Mon1a    | 315999 | 1,03 | down |
| 5624981 | 7181193 | 1328292 | MON1 homolog b (yeast)            | Mon1b    | 307868 | 1,07 | up   |
| 5817231 | 7181193 | 1328288 | MON1 homolog b (yeast)            | Mon1b    | 307868 | 1,24 | up   |
| 5871430 | 7181193 | 1328292 | MON1 homolog b (yeast)            | Mon1b    | 307868 | 1,36 | down |
| 5895228 | 7181193 | 1328290 | MON1 homolog b (yeast)            | Mon1b    | 307868 | 1,56 | down |
| 5927400 | 7181193 | 1328292 | MON1 homolog b (yeast)            | Mon1b    | 307868 | 1,12 | down |
| 6093705 | 7181193 | 1328288 | MON1 homolog b (yeast)            | Mon1b    | 307868 | 1,02 | down |
| 6416432 | 7181193 | 1328292 | MON1 homolog b (yeast)            | Mon1b    | 307868 | 1,19 | up   |
| 6697530 | 7181193 | 1328291 | MON1 homolog b (yeast)            | Mon1b    | 307868 | 1,05 | up   |
| 5739825 | 7373289 | 1804804 | monoamine oxidase B               | Maob     | 25750  | 1,04 | up   |
| 5802979 | 7373289 | 1804805 | monoamine oxidase B               | Maob     | 25750  | 1,04 | up   |
| 5861364 | 7373289 | 1804802 | monoamine oxidase B               | Maob     | 25750  | 1,21 | up   |
| 5930447 | 7373289 | 1804796 | monoamine oxidase B               | Maob     | 25750  | 1,07 | down |
| 5983612 | 7373289 | 1804806 | monoamine oxidase B               | Maob     | 25750  | 1,05 | down |
| 5996267 | 7373289 | 1804798 | monoamine oxidase B               | Maob     | 25750  | 1,37 | up   |
| 6050793 | 7373289 | 1804803 | monoamine oxidase B               | Maob     | 25750  | 2,28 | up   |
| 6057628 | 7373289 | 1804793 | monoamine oxidase B               | Maob     | 25750  | 1,01 | down |
| 6113669 | 7373289 | 1804800 | monoamine oxidase B               | Maob     | 25750  | 1,04 | up   |
| 6177830 | 7373289 | 1804792 | monoamine oxidase B               | Maob     | 25750  | 1,73 | up   |
| 6365736 | 7373289 | 1804807 | monoamine oxidase B               | Maob     | 25750  | 1,67 | down |
| 6443031 | 7373289 | 1804794 | monoamine oxidase B               | Maob     | 25750  | 1,07 | up   |
| 6465863 | 7373289 | 1804798 | monoamine oxidase B               | Maob     | 25750  | 1,06 | up   |
| 6476218 | 7373289 | 1804801 | monoamine oxidase B               | Maob     | 25750  | 1,24 | down |
| 6500053 | 7373289 | 1804797 | monoamine oxidase B               | Maob     | 25750  | 1,15 | down |
| 6553418 | 7373289 | 1804795 | monoamine oxidase B               | Maob     | 25750  | 1,03 | down |
| 6663901 | 7373289 | 1804799 | monoamine oxidase B               | Maob     | 25750  | 1,00 | up   |
| 6711133 | 7092965 | 1110206 | MORC family CW-type zinc finger 1 | Morc1    | 360712 | 1,56 | down |
| 5662794 | 7098126 | 1122965 | M-phase phosphoprotein 9          | Mphosph9 | 288654 | 1,40 | up   |
| 5677525 | 7098126 | 1122960 | M-phase phosphoprotein 9          | Mphosph9 | 288654 | 1,22 | up   |
| 5841836 | 7098126 | 1122958 | M-phase phosphoprotein 9          | Mphosph9 | 288654 | 1,20 | up   |
| 6060114 | 7098126 | 1122959 | M-phase phosphoprotein 9          | Mphosph9 | 288654 | 1,09 | down |
| 6390838 | 7098126 | 1122963 | M-phase phosphoprotein 9          | Mphosph9 | 288654 | 1,04 | up   |
| 6475422 | 7098126 | 1122962 | M-phase phosphoprotein 9          | Mphosph9 | 288654 | 1,12 | up   |
| 6527687 | 7098126 | 1122984 | M-phase phosphoprotein 9          | Mphosph9 | 288654 | 1,09 | down |
| 6634567 | 7098126 | 1122966 | M-phase phosphoprotein 9          | Mphosph9 | 288654 | 1,54 | up   |
| 5641535 | 7094139 | 1112916 | mucin 4, cell surface associated  | Muc4     | 303887 | 1,36 | up   |
| 5642686 | 7094139 | 1112910 | mucin 4, cell surface associated  | Muc4     | 303887 | 1,01 | down |
| 5663535 | 7094139 | 1112916 | mucin 4, cell surface associated  | Muc4     | 303887 | 1,31 | down |
| 5793140 | 7094139 | 1112916 | mucin 4, cell surface associated  | Muc4     | 303887 | 1,49 | down |
| 5807911 | 7094139 | 1112889 | mucin 4, cell surface associated  | Muc4     | 303887 | 1,70 | down |
| 5828335 | 7094139 | 1112921 | mucin 4, cell surface associated  | Muc4     | 303887 | 1,29 | down |
| 5829131 | 7094139 | 1112921 | mucin 4, cell surface associated  | Muc4     | 303887 | 1,10 | down |
| 5842492 | 7094139 | 1112889 | mucin 4, cell surface associated  | Muc4     | 303887 | 1,06 | down |
| 5846143 | 7094139 | 1112916 | mucin 4, cell surface associated  | Muc4     | 303887 | 1,18 | down |
| 5984100 | 7094139 | 1112916 | mucin 4, cell surface associated  | Muc4     | 303887 | 1,01 | up   |
| 5996509 | 7094139 | 1112904 | mucin 4, cell surface associated  | Muc4     | 303887 | 1,09 | up   |
| 6011314 | 7094139 | 1112902 | mucin 4, cell surface associated  | Muc4     | 303887 | 1,25 | down |
| 6060347 | 7094139 | 1112916 | mucin 4, cell surface associated  | Muc4     | 303887 | 1,18 | up   |
| 6075613 | 7094139 | 1112906 | mucin 4, cell surface associated  | Muc4     | 303887 | 1,26 | up   |
| 6140304 | 7094139 | 1112909 | mucin 4, cell surface associated  | Muc4     | 303887 | 1,33 | down |
| 6140594 | 7094139 | 1112893 | mucin 4, cell surface associated  | Muc4     | 303887 | 1,03 | down |
| 6184104 | 7094139 | 1112890 | mucin 4, cell surface associated  | Muc4     | 303887 | 1,27 | up   |
| 6194031 | 7094139 | 1112905 | mucin 4, cell surface associated  | Muc4     | 303887 | 1,86 | up   |
| 6259353 | 7094139 | 1112899 | mucin 4, cell surface associated  | Muc4     | 303887 | 1,33 | up   |
| 6269050 | 7094139 | 1112908 | mucin 4, cell surface associated  | Muc4     | 303887 | 1,51 | down |

|         |         |         |                                            |        |        |      |      |
|---------|---------|---------|--------------------------------------------|--------|--------|------|------|
| 6287725 | 7094139 | 1112891 | mucin 4, cell surface associated           | Muc4   | 303887 | 1,22 | up   |
| 6315769 | 7094139 | 1112913 | mucin 4, cell surface associated           | Muc4   | 303887 | 1,21 | up   |
| 6324140 | 7094139 | 1112896 | mucin 4, cell surface associated           | Muc4   | 303887 | 1,07 | up   |
| 6336956 | 7094139 | 1112892 | mucin 4, cell surface associated           | Muc4   | 303887 | 1,18 | up   |
| 6345072 | 7094139 | 1112903 | mucin 4, cell surface associated           | Muc4   | 303887 | 1,18 | up   |
| 6376039 | 7094139 | 1112915 | mucin 4, cell surface associated           | Muc4   | 303887 | 1,73 | down |
| 6402687 | 7094139 | 1112918 | mucin 4, cell surface associated           | Muc4   | 303887 | 1,45 | up   |
| 6495078 | 7094139 | 1112911 | mucin 4, cell surface associated           | Muc4   | 303887 | 1,05 | up   |
| 6558116 | 7094139 | 1112907 | mucin 4, cell surface associated           | Muc4   | 303887 | 1,58 | down |
| 6573971 | 7094139 | 1112898 | mucin 4, cell surface associated           | Muc4   | 303887 | 1,15 | down |
| 6631163 | 7094139 | 1112921 | mucin 4, cell surface associated           | Muc4   | 303887 | 1,03 | up   |
| 6647512 | 7094139 | 1112895 | mucin 4, cell surface associated           | Muc4   | 303887 | 1,31 | down |
| 6677765 | 7094139 | 1112901 | mucin 4, cell surface associated           | Muc4   | 303887 | 1,76 | up   |
| 6685295 | 7094139 | 1112900 | mucin 4, cell surface associated           | Muc4   | 303887 | 1,07 | up   |
| 6697729 | 7094139 | 1112917 | mucin 4, cell surface associated           | Muc4   | 303887 | 1,25 | up   |
| 5695892 | 7058761 | 1028764 | mucin and cadherin like                    | Mucdhl | 171554 | 1,03 | down |
| 5826682 | 7058761 | 1028767 | mucin and cadherin like                    | Mucdhl | 171554 | 1,19 | down |
| 5885427 | 7058761 | 1028769 | mucin and cadherin like                    | Mucdhl | 171554 | 1,01 | up   |
| 5947956 | 7058761 | 1028763 | mucin and cadherin like                    | Mucdhl | 171554 | 1,00 | up   |
| 5977012 | 7058761 | 1028761 | mucin and cadherin like                    | Mucdhl | 171554 | 1,37 | down |
| 6009548 | 7058761 | 1028773 | mucin and cadherin like                    | Mucdhl | 171554 | 1,66 | up   |
| 6087589 | 7058761 | 1028762 | mucin and cadherin like                    | Mucdhl | 171554 | 1,36 | down |
| 6158174 | 7058761 | 1028768 | mucin and cadherin like                    | Mucdhl | 171554 | 1,34 | up   |
| 6188568 | 7058761 | 1028771 | mucin and cadherin like                    | Mucdhl | 171554 | 1,05 | down |
| 6218069 | 7058761 | 1028760 | mucin and cadherin like                    | Mucdhl | 171554 | 1,34 | down |
| 6356124 | 7058761 | 1028770 | mucin and cadherin like                    | Mucdhl | 171554 | 1,04 | down |
| 6380442 | 7058761 | 1028760 | mucin and cadherin like                    | Mucdhl | 171554 | 1,24 | up   |
| 6381109 | 7058761 | 1028759 | mucin and cadherin like                    | Mucdhl | 171554 | 1,09 | up   |
| 6510155 | 7058761 | 1028761 | mucin and cadherin like                    | Mucdhl | 171554 | 1,26 | up   |
| 6537835 | 7058761 | 1028766 | mucin and cadherin like                    | Mucdhl | 171554 | 1,14 | up   |
| 6540378 | 7058761 | 1028774 | mucin and cadherin like                    | Mucdhl | 171554 | 1,01 | up   |
| 6558563 | 7058761 | 1028759 | mucin and cadherin like                    | Mucdhl | 171554 | 1,46 | down |
| 6585570 | 7058761 | 1028765 | mucin and cadherin like                    | Mucdhl | 171554 | 1,69 | down |
| 6632595 | 7058761 | 1028772 | mucin and cadherin like                    | Mucdhl | 171554 | 1,28 | up   |
| 6644399 | 7058761 | 1028758 | mucin and cadherin like                    | Mucdhl | 171554 | 1,08 | down |
| 6694427 | 7058761 | 1028758 | mucin and cadherin like                    | Mucdhl | 171554 | 1,00 | down |
| 6740028 | 7058761 | 1028774 | mucin and cadherin like                    | Mucdhl | 171554 | 2,19 | down |
| 6019842 | 7170764 | 1301458 | multiple EGF-like domains 10               | Megf10 | 291445 | 1,34 | down |
| 6187489 | 7170764 | 1301454 | multiple EGF-like domains 10               | Megf10 | 291445 | 1,25 | up   |
| 6246159 | 7170764 | 1301465 | multiple EGF-like domains 10               | Megf10 | 291445 | 1,03 | up   |
| 6334563 | 7170764 | 1301461 | multiple EGF-like domains 10               | Megf10 | 291445 | 1,11 | up   |
| 6664406 | 7170764 | 1301453 | multiple EGF-like domains 10               | Megf10 | 291445 | 1,18 | down |
| 5944571 | 7337224 | 1712542 | multiple EGF-like-domains 11               | Megf11 | 691517 | 1,30 | up   |
| 6121937 | 7337224 | 1712630 | multiple EGF-like-domains 11               | Megf11 | 691517 | 1,33 | up   |
| 6248969 | 7337224 | 1712627 | multiple EGF-like-domains 11               | Megf11 | 691517 | 1,02 | up   |
| 6565261 | 7337224 | 1712571 | multiple EGF-like-domains 11               | Megf11 | 691517 | 1,34 | up   |
| 6577028 | 7337224 | 1712628 | multiple EGF-like-domains 11               | Megf11 | 691517 | 1,00 | up   |
| 5637197 | 7059765 | 1030969 | MUS81 endonuclease homolog (S. cerevisiae) | Mus81  | 293678 | 1,14 | down |
| 5699569 | 7059765 | 1030960 | MUS81 endonuclease homolog (S. cerevisiae) | Mus81  | 293678 | 1,02 | up   |
| 5712013 | 7059765 | 1030963 | MUS81 endonuclease homolog (S. cerevisiae) | Mus81  | 293678 | 1,02 | up   |
| 5726906 | 7059765 | 1030966 | MUS81 endonuclease homolog (S. cerevisiae) | Mus81  | 293678 | 1,21 | up   |
| 5754925 | 7059765 | 1030967 | MUS81 endonuclease homolog (S. cerevisiae) | Mus81  | 293678 | 1,24 | down |
| 5771967 | 7059765 | 1030961 | MUS81 endonuclease homolog (S. cerevisiae) | Mus81  | 293678 | 1,63 | up   |
| 5842639 | 7059765 | 1030957 | MUS81 endonuclease homolog (S. cerevisiae) | Mus81  | 293678 | 1,05 | up   |
| 5870628 | 7059765 | 1030966 | MUS81 endonuclease homolog (S. cerevisiae) | Mus81  | 293678 | 1,11 | up   |
| 5945519 | 7059765 | 1030964 | MUS81 endonuclease homolog (S. cerevisiae) | Mus81  | 293678 | 1,41 | down |

|         |         |         |                                            |       |        |      |      |
|---------|---------|---------|--------------------------------------------|-------|--------|------|------|
| 6007182 | 7059765 | 1030955 | MUS81 endonuclease homolog (S. cerevisiae) | Mus81 | 293678 | 1,27 | down |
| 6029080 | 7059765 | 1030956 | MUS81 endonuclease homolog (S. cerevisiae) | Mus81 | 293678 | 1,04 | up   |
| 6198066 | 7059765 | 1030958 | MUS81 endonuclease homolog (S. cerevisiae) | Mus81 | 293678 | 1,61 | down |
| 6348244 | 7059765 | 1030968 | MUS81 endonuclease homolog (S. cerevisiae) | Mus81 | 293678 | 1,41 | up   |
| 6524042 | 7059765 | 1030964 | MUS81 endonuclease homolog (S. cerevisiae) | Mus81 | 293678 | 1,21 | up   |
| 6541718 | 7059765 | 1030959 | MUS81 endonuclease homolog (S. cerevisiae) | Mus81 | 293678 | 1,05 | down |
| 6620894 | 7059765 | 1030955 | MUS81 endonuclease homolog (S. cerevisiae) | Mus81 | 293678 | 2,67 | up   |
| 6707200 | 7059765 | 1030962 | MUS81 endonuclease homolog (S. cerevisiae) | Mus81 | 293678 | 1,51 | up   |
| 6717115 | 7059765 | 1030965 | MUS81 endonuclease homolog (S. cerevisiae) | Mus81 | 293678 | 1,08 | down |
| 5627902 | 7102951 | 1134987 | Musashi homolog 1(Drosophila)              | Msi1  | 259272 | 1,83 | up   |
| 5716284 | 7102951 | 1134978 | Musashi homolog 1(Drosophila)              | Msi1  | 259272 | 1,59 | down |
| 5849459 | 7102951 | 1134979 | Musashi homolog 1(Drosophila)              | Msi1  | 259272 | 1,65 | down |
| 6125625 | 7102951 | 1134981 | Musashi homolog 1(Drosophila)              | Msi1  | 259272 | 1,07 | down |
| 6170832 | 7102951 | 1134988 | Musashi homolog 1(Drosophila)              | Msi1  | 259272 | 1,34 | down |
| 6193505 | 7102951 | 1134984 | Musashi homolog 1(Drosophila)              | Msi1  | 259272 | 1,23 | up   |
| 6268007 | 7102951 | 1134977 | Musashi homolog 1(Drosophila)              | Msi1  | 259272 | 1,41 | down |
| 6438943 | 7102951 | 1134985 | Musashi homolog 1(Drosophila)              | Msi1  | 259272 | 1,40 | up   |
| 6446461 | 7102951 | 1134986 | Musashi homolog 1(Drosophila)              | Msi1  | 259272 | 1,87 | down |
| 6499552 | 7102951 | 1134983 | Musashi homolog 1(Drosophila)              | Msi1  | 259272 | 1,61 | up   |
| 6560756 | 7102951 | 1134982 | Musashi homolog 1(Drosophila)              | Msi1  | 259272 | 1,03 | down |
| 6586291 | 7102951 | 1134978 | Musashi homolog 1(Drosophila)              | Msi1  | 259272 | 2,36 | down |
| 6744626 | 7102951 | 1134980 | Musashi homolog 1(Drosophila)              | Msi1  | 259272 | 1,91 | down |
| 5715055 | 7384179 | 1829770 | muscleblind-like 3 (Drosophila)            | Mbnl3 | 302492 | 1,07 | down |
| 5780698 | 7384179 | 1829783 | muscleblind-like 3 (Drosophila)            | Mbnl3 | 302492 | 1,13 | up   |
| 5850478 | 7384179 | 1829777 | muscleblind-like 3 (Drosophila)            | Mbnl3 | 302492 | 1,04 | down |
| 5939422 | 7384179 | 1829772 | muscleblind-like 3 (Drosophila)            | Mbnl3 | 302492 | 2,18 | down |
| 5963009 | 7384179 | 1829776 | muscleblind-like 3 (Drosophila)            | Mbnl3 | 302492 | 1,12 | up   |
| 5966339 | 7384179 | 1829779 | muscleblind-like 3 (Drosophila)            | Mbnl3 | 302492 | 1,16 | up   |
| 6154087 | 7384179 | 1829775 | muscleblind-like 3 (Drosophila)            | Mbnl3 | 302492 | 1,02 | down |
| 6161709 | 7384179 | 1829779 | muscleblind-like 3 (Drosophila)            | Mbnl3 | 302492 | 1,04 | down |
| 6388329 | 7384179 | 1829783 | muscleblind-like 3 (Drosophila)            | Mbnl3 | 302492 | 1,27 | down |
| 6478653 | 7384179 | 1829775 | muscleblind-like 3 (Drosophila)            | Mbnl3 | 302492 | 1,08 | up   |
| 5760896 | 7107733 | 1146386 | myelin protein zero                        | Mpz   | 24564  | 2,45 | down |
| 5846532 | 7107733 | 1146389 | myelin protein zero                        | Mpz   | 24564  | 1,34 | up   |
| 5949985 | 7107733 | 1146391 | myelin protein zero                        | Mpz   | 24564  | 1,03 | down |
| 5973366 | 7107733 | 1146388 | myelin protein zero                        | Mpz   | 24564  | 1,91 | down |
| 6126919 | 7107733 | 1146387 | myelin protein zero                        | Mpz   | 24564  | 1,00 | up   |
| 6273217 | 7107733 | 1146391 | myelin protein zero                        | Mpz   | 24564  | 1,11 | up   |
| 6292116 | 7107733 | 1146390 | myelin protein zero                        | Mpz   | 24564  | 1,09 | up   |
| 6598294 | 7107733 | 1146391 | myelin protein zero                        | Mpz   | 24564  | 1,35 | up   |
| 6715458 | 7107733 | 1146391 | myelin protein zero                        | Mpz   | 24564  | 1,05 | up   |
| 5820248 | 7335632 | 1708457 | myelin protein zero-like 3                 | Mpzl3 | 363054 | 2,21 | down |
| 5958272 | 7335632 | 1708455 | myelin protein zero-like 3                 | Mpzl3 | 363054 | 1,27 | up   |
| 5974144 | 7335632 | 1708455 | myelin protein zero-like 3                 | Mpzl3 | 363054 | 1,33 | up   |
| 6009034 | 7335632 | 1708451 | myelin protein zero-like 3                 | Mpzl3 | 363054 | 1,25 | up   |
| 6010274 | 7335632 | 1708457 | myelin protein zero-like 3                 | Mpzl3 | 363054 | 1,01 | up   |
| 6056807 | 7335632 | 1708456 | myelin protein zero-like 3                 | Mpzl3 | 363054 | 1,54 | up   |
| 6224094 | 7335632 | 1708454 | myelin protein zero-like 3                 | Mpzl3 | 363054 | 1,06 | up   |
| 6313953 | 7335632 | 1708450 | myelin protein zero-like 3                 | Mpzl3 | 363054 | 1,13 | up   |
| 5685754 | 7236492 | 1464551 | myelin transcription factor 1              | Myt1  | 362291 | 1,06 | down |
| 5687220 | 7236492 | 1464567 | myelin transcription factor 1              | Myt1  | 362291 | 1,10 | down |
| 5766018 | 7236492 | 1464549 | myelin transcription factor 1              | Myt1  | 362291 | 1,01 | down |
| 5841182 | 7236492 | 1464546 | myelin transcription factor 1              | Myt1  | 362291 | 1,39 | up   |
| 5854045 | 7236492 | 1464547 | myelin transcription factor 1              | Myt1  | 362291 | 1,20 | down |
| 5900030 | 7236492 | 1464557 | myelin transcription factor 1              | Myt1  | 362291 | 1,34 | up   |
| 5907604 | 7236492 | 1464546 | myelin transcription factor 1              | Myt1  | 362291 | 1,21 | down |

|         |         |         |                                              |      |        |      |      |
|---------|---------|---------|----------------------------------------------|------|--------|------|------|
| 5948055 | 7236492 | 1464548 | myelin transcription factor 1                | Myt1 | 362291 | 1,00 | up   |
| 5978262 | 7236492 | 1464567 | myelin transcription factor 1                | Myt1 | 362291 | 1,42 | down |
| 6017382 | 7236492 | 1464555 | myelin transcription factor 1                | Myt1 | 362291 | 1,13 | up   |
| 6091620 | 7236492 | 1464567 | myelin transcription factor 1                | Myt1 | 362291 | 1,58 | up   |
| 6215242 | 7236492 | 1464546 | myelin transcription factor 1                | Myt1 | 362291 | 1,07 | down |
| 6344520 | 7236492 | 1464547 | myelin transcription factor 1                | Myt1 | 362291 | 1,14 | down |
| 6360114 | 7236492 | 1464562 | myelin transcription factor 1                | Myt1 | 362291 | 1,08 | up   |
| 6410791 | 7236492 | 1464564 | myelin transcription factor 1                | Myt1 | 362291 | 1,28 | down |
| 6426109 | 7236492 | 1464550 | myelin transcription factor 1                | Myt1 | 362291 | 1,02 | up   |
| 6461973 | 7236492 | 1464567 | myelin transcription factor 1                | Myt1 | 362291 | 1,26 | down |
| 6484421 | 7236492 | 1464559 | myelin transcription factor 1                | Myt1 | 362291 | 1,36 | down |
| 6560103 | 7236492 | 1464556 | myelin transcription factor 1                | Myt1 | 362291 | 1,05 | down |
| 6576042 | 7236492 | 1464563 | myelin transcription factor 1                | Myt1 | 362291 | 1,11 | down |
| 6599123 | 7236492 | 1464566 | myelin transcription factor 1                | Myt1 | 362291 | 1,34 | down |
| 6645348 | 7236492 | 1464558 | myelin transcription factor 1                | Myt1 | 362291 | 1,08 | up   |
| 6646180 | 7236492 | 1464567 | myelin transcription factor 1                | Myt1 | 362291 | 1,19 | down |
| 6655804 | 7236492 | 1464547 | myelin transcription factor 1                | Myt1 | 362291 | 1,27 | up   |
| 6667945 | 7236492 | 1464561 | myelin transcription factor 1                | Myt1 | 362291 | 1,43 | down |
| 6723288 | 7236492 | 1464554 | myelin transcription factor 1                | Myt1 | 362291 | 1,31 | up   |
| 6746615 | 7236492 | 1464553 | myelin transcription factor 1                | Myt1 | 362291 | 1,12 | down |
| 5625165 | 7049916 | 1009200 | myelin-associated glycoprotein               | Mag  | 29409  | 1,30 | down |
| 5688723 | 7049916 | 1009206 | myelin-associated glycoprotein               | Mag  | 29409  | 1,42 | down |
| 5769909 | 7049916 | 1009202 | myelin-associated glycoprotein               | Mag  | 29409  | 1,30 | up   |
| 5827182 | 7049916 | 1009203 | myelin-associated glycoprotein               | Mag  | 29409  | 1,01 | up   |
| 6067354 | 7049916 | 1009202 | myelin-associated glycoprotein               | Mag  | 29409  | 1,57 | up   |
| 6215116 | 7049916 | 1009205 | myelin-associated glycoprotein               | Mag  | 29409  | 1,03 | down |
| 6224156 | 7049916 | 1009207 | myelin-associated glycoprotein               | Mag  | 29409  | 1,01 | up   |
| 6259153 | 7049916 | 1009198 | myelin-associated glycoprotein               | Mag  | 29409  | 1,10 | down |
| 6319226 | 7049916 | 1009197 | myelin-associated glycoprotein               | Mag  | 29409  | 1,23 | up   |
| 6424814 | 7049916 | 1009201 | myelin-associated glycoprotein               | Mag  | 29409  | 1,17 | down |
| 6523260 | 7049916 | 1009207 | myelin-associated glycoprotein               | Mag  | 29409  | 1,51 | up   |
| 6623938 | 7049916 | 1009204 | myelin-associated glycoprotein               | Mag  | 29409  | 1,27 | down |
| 6697543 | 7049916 | 1009209 | myelin-associated glycoprotein               | Mag  | 29409  | 1,03 | down |
| 6717110 | 7049916 | 1009208 | myelin-associated glycoprotein               | Mag  | 29409  | 1,17 | down |
| 6189374 | 7317471 | 1666225 | myelocytomatosis oncogene                    | Myc  | 24577  | 2,44 | down |
| 6218948 | 7317471 | 1666225 | myelocytomatosis oncogene                    | Myc  | 24577  | 1,87 | up   |
| 6410640 | 7317471 | 1666227 | myelocytomatosis oncogene                    | Myc  | 24577  | 1,30 | up   |
| 6442901 | 7317471 | 1666228 | myelocytomatosis oncogene                    | Myc  | 24577  | 1,05 | up   |
| 6611276 | 7317471 | 1666229 | myelocytomatosis oncogene                    | Myc  | 24577  | 2,78 | down |
| 6745472 | 7317471 | 1666226 | myelocytomatosis oncogene                    | Myc  | 24577  | 2,92 | up   |
| 5637814 | 7344838 | 1732438 | myeloid/lymphoid or mixed-lineage leukemia 1 | Mll1 | 315606 | 1,17 | down |
| 5641093 | 7344838 | 1732454 | myeloid/lymphoid or mixed-lineage leukemia 1 | Mll1 | 315606 | 1,13 | down |
| 5664330 | 7344838 | 1732425 | myeloid/lymphoid or mixed-lineage leukemia 1 | Mll1 | 315606 | 1,44 | down |
| 5681398 | 7344838 | 1732448 | myeloid/lymphoid or mixed-lineage leukemia 1 | Mll1 | 315606 | 1,26 | up   |
| 5709313 | 7344838 | 1732430 | myeloid/lymphoid or mixed-lineage leukemia 1 | Mll1 | 315606 | 1,29 | up   |
| 5721054 | 7344838 | 1732460 | myeloid/lymphoid or mixed-lineage leukemia 1 | Mll1 | 315606 | 1,06 | up   |
| 5744682 | 7344838 | 1732416 | myeloid/lymphoid or mixed-lineage leukemia 1 | Mll1 | 315606 | 1,33 | down |
| 5769609 | 7344838 | 1732447 | myeloid/lymphoid or mixed-lineage leukemia 1 | Mll1 | 315606 | 1,10 | up   |
| 5784482 | 7344838 | 1732423 | myeloid/lymphoid or mixed-lineage leukemia 1 | Mll1 | 315606 | 1,23 | down |
| 5813848 | 7344838 | 1732424 | myeloid/lymphoid or mixed-lineage leukemia 1 | Mll1 | 315606 | 1,24 | up   |
| 5888913 | 7344838 | 1732418 | myeloid/lymphoid or mixed-lineage leukemia 1 | Mll1 | 315606 | 1,02 | up   |
| 5898230 | 7344838 | 1732431 | myeloid/lymphoid or mixed-lineage leukemia 1 | Mll1 | 315606 | 1,07 | up   |
| 5899215 | 7344838 | 1732427 | myeloid/lymphoid or mixed-lineage leukemia 1 | Mll1 | 315606 | 1,22 | up   |
| 5933400 | 7344838 | 1732452 | myeloid/lymphoid or mixed-lineage leukemia 1 | Mll1 | 315606 | 1,32 | up   |
| 5937401 | 7344838 | 1732435 | myeloid/lymphoid or mixed-lineage leukemia 1 | Mll1 | 315606 | 1,17 | down |
| 5939956 | 7344838 | 1732439 | myeloid/lymphoid or mixed-lineage leukemia 1 | Mll1 | 315606 | 1,08 | up   |



|         |         |         |                                                                              |       |        |      |      |
|---------|---------|---------|------------------------------------------------------------------------------|-------|--------|------|------|
| 5944094 | 7344838 | 1732428 | myeloid/lymphoid or mixed-lineage leukemia 1                                 | Mll1  | 315606 | 1,07 | up   |
| 5995246 | 7344838 | 1732449 | myeloid/lymphoid or mixed-lineage leukemia 1                                 | Mll1  | 315606 | 1,28 | up   |
| 6012862 | 7344838 | 1732452 | myeloid/lymphoid or mixed-lineage leukemia 1                                 | Mll1  | 315606 | 1,09 | down |
| 6024924 | 7344838 | 1732442 | myeloid/lymphoid or mixed-lineage leukemia 1                                 | Mll1  | 315606 | 1,12 | up   |
| 6044794 | 7344838 | 1732437 | myeloid/lymphoid or mixed-lineage leukemia 1                                 | Mll1  | 315606 | 1,13 | up   |
| 6085456 | 7344838 | 1732418 | myeloid/lymphoid or mixed-lineage leukemia 1                                 | Mll1  | 315606 | 1,04 | up   |
| 6175667 | 7344838 | 1732432 | myeloid/lymphoid or mixed-lineage leukemia 1                                 | Mll1  | 315606 | 1,07 | up   |
| 6188732 | 7344838 | 1732426 | myeloid/lymphoid or mixed-lineage leukemia 1                                 | Mll1  | 315606 | 1,10 | down |
| 6205932 | 7344838 | 1732429 | myeloid/lymphoid or mixed-lineage leukemia 1                                 | Mll1  | 315606 | 1,13 | up   |
| 6212864 | 7344838 | 1732434 | myeloid/lymphoid or mixed-lineage leukemia 1                                 | Mll1  | 315606 | 1,08 | down |
| 6222212 | 7344838 | 1732451 | myeloid/lymphoid or mixed-lineage leukemia 1                                 | Mll1  | 315606 | 1,13 | up   |
| 6237979 | 7344838 | 1732452 | myeloid/lymphoid or mixed-lineage leukemia 1                                 | Mll1  | 315606 | 1,06 | down |
| 6255774 | 7344838 | 1732446 | myeloid/lymphoid or mixed-lineage leukemia 1                                 | Mll1  | 315606 | 1,07 | down |
| 6256823 | 7344838 | 1732441 | myeloid/lymphoid or mixed-lineage leukemia 1                                 | Mll1  | 315606 | 1,18 | up   |
| 6264980 | 7344838 | 1732447 | myeloid/lymphoid or mixed-lineage leukemia 1                                 | Mll1  | 315606 | 1,06 | down |
| 6270810 | 7344838 | 1732452 | myeloid/lymphoid or mixed-lineage leukemia 1                                 | Mll1  | 315606 | 1,31 | up   |
| 6283792 | 7344838 | 1732452 | myeloid/lymphoid or mixed-lineage leukemia 1                                 | Mll1  | 315606 | 1,16 | up   |
| 6350480 | 7344838 | 1732452 | myeloid/lymphoid or mixed-lineage leukemia 1                                 | Mll1  | 315606 | 1,11 | down |
| 6370526 | 7344838 | 1732440 | myeloid/lymphoid or mixed-lineage leukemia 1                                 | Mll1  | 315606 | 1,03 | up   |
| 6402934 | 7344838 | 1732443 | myeloid/lymphoid or mixed-lineage leukemia 1                                 | Mll1  | 315606 | 1,15 | down |
| 6403284 | 7344838 | 1732445 | myeloid/lymphoid or mixed-lineage leukemia 1                                 | Mll1  | 315606 | 1,03 | down |
| 6422583 | 7344838 | 1732447 | myeloid/lymphoid or mixed-lineage leukemia 1                                 | Mll1  | 315606 | 1,26 | down |
| 6427047 | 7344838 | 1732444 | myeloid/lymphoid or mixed-lineage leukemia 1                                 | Mll1  | 315606 | 1,15 | up   |
| 6449027 | 7344838 | 1732424 | myeloid/lymphoid or mixed-lineage leukemia 1                                 | Mll1  | 315606 | 1,13 | up   |
| 6449534 | 7344838 | 1732433 | myeloid/lymphoid or mixed-lineage leukemia 1                                 | Mll1  | 315606 | 1,19 | up   |
| 6458281 | 7344838 | 1732417 | myeloid/lymphoid or mixed-lineage leukemia 1                                 | Mll1  | 315606 | 1,72 | down |
| 6481197 | 7344838 | 1732420 | myeloid/lymphoid or mixed-lineage leukemia 1                                 | Mll1  | 315606 | 1,22 | up   |
| 6490892 | 7344838 | 1732419 | myeloid/lymphoid or mixed-lineage leukemia 1                                 | Mll1  | 315606 | 1,01 | down |
| 6497453 | 7344838 | 1732423 | myeloid/lymphoid or mixed-lineage leukemia 1                                 | Mll1  | 315606 | 1,05 | up   |
| 6552207 | 7344838 | 1732452 | myeloid/lymphoid or mixed-lineage leukemia 1                                 | Mll1  | 315606 | 1,11 | down |
| 6555870 | 7344838 | 1732452 | myeloid/lymphoid or mixed-lineage leukemia 1                                 | Mll1  | 315606 | 1,16 | down |
| 6559911 | 7344838 | 1732436 | myeloid/lymphoid or mixed-lineage leukemia 1                                 | Mll1  | 315606 | 1,08 | up   |
| 6622447 | 7344838 | 1732452 | myeloid/lymphoid or mixed-lineage leukemia 1                                 | Mll1  | 315606 | 1,24 | up   |
| 6648449 | 7344838 | 1732422 | myeloid/lymphoid or mixed-lineage leukemia 1                                 | Mll1  | 315606 | 1,22 | up   |
| 6705134 | 7344838 | 1732421 | myeloid/lymphoid or mixed-lineage leukemia 1                                 | Mll1  | 315606 | 1,01 | down |
| 6712772 | 7344838 | 1732421 | myeloid/lymphoid or mixed-lineage leukemia 1                                 | Mll1  | 315606 | 1,02 | down |
| 5630856 | 7260613 | 1524299 | myeloid/lymphoid or mixed-lineage leukemia 5 (trithorax homolog, Drosophila) | Mll5  | 311968 | 1,14 | down |
| 5689274 | 7260613 | 1524299 | myeloid/lymphoid or mixed-lineage leukemia 5 (trithorax homolog, Drosophila) | Mll5  | 311968 | 1,02 | down |
| 5716513 | 7260613 | 1524288 | myeloid/lymphoid or mixed-lineage leukemia 5 (trithorax homolog, Drosophila) | Mll5  | 311968 | 1,38 | down |
| 5763280 | 7260613 | 1524293 | myeloid/lymphoid or mixed-lineage leukemia 5 (trithorax homolog, Drosophila) | Mll5  | 311968 | 1,17 | up   |
| 5833068 | 7260613 | 1524284 | myeloid/lymphoid or mixed-lineage leukemia 5 (trithorax homolog, Drosophila) | Mll5  | 311968 | 1,03 | down |
| 5854498 | 7260613 | 1524299 | myeloid/lymphoid or mixed-lineage leukemia 5 (trithorax homolog, Drosophila) | Mll5  | 311968 | 1,15 | down |
| 5889754 | 7260613 | 1524285 | myeloid/lymphoid or mixed-lineage leukemia 5 (trithorax homolog, Drosophila) | Mll5  | 311968 | 1,19 | down |
| 5985207 | 7260613 | 1524286 | myeloid/lymphoid or mixed-lineage leukemia 5 (trithorax homolog, Drosophila) | Mll5  | 311968 | 1,04 | down |
| 6195207 | 7260613 | 1524297 | myeloid/lymphoid or mixed-lineage leukemia 5 (trithorax homolog, Drosophila) | Mll5  | 311968 | 1,08 | up   |
| 6256687 | 7260613 | 1524291 | myeloid/lymphoid or mixed-lineage leukemia 5 (trithorax homolog, Drosophila) | Mll5  | 311968 | 1,19 | up   |
| 6302784 | 7260613 | 1524292 | myeloid/lymphoid or mixed-lineage leukemia 5 (trithorax homolog, Drosophila) | Mll5  | 311968 | 1,23 | up   |
| 6377066 | 7260613 | 1524290 | myeloid/lymphoid or mixed-lineage leukemia 5 (trithorax homolog, Drosophila) | Mll5  | 311968 | 1,21 | down |
| 6390429 | 7260613 | 1524295 | myeloid/lymphoid or mixed-lineage leukemia 5 (trithorax homolog, Drosophila) | Mll5  | 311968 | 1,09 | up   |
| 6464304 | 7260613 | 1524296 | myeloid/lymphoid or mixed-lineage leukemia 5 (trithorax homolog, Drosophila) | Mll5  | 311968 | 1,06 | down |
| 6607105 | 7260613 | 1524289 | myeloid/lymphoid or mixed-lineage leukemia 5 (trithorax homolog, Drosophila) | Mll5  | 311968 | 1,19 | up   |
| 6627101 | 7260613 | 1524289 | myeloid/lymphoid or mixed-lineage leukemia 5 (trithorax homolog, Drosophila) | Mll5  | 311968 | 1,08 | down |
| 5791130 | 7358859 | 1766992 | myomesin 1                                                                   | Myom1 | 316740 | 1,13 | down |
| 6126388 | 7358859 | 1766997 | myomesin 1                                                                   | Myom1 | 316740 | 1,24 | down |
| 6375008 | 7358859 | 1766995 | myomesin 1                                                                   | Myom1 | 316740 | 1,03 | up   |
| 6706408 | 7358859 | 1766991 | myomesin 1                                                                   | Myom1 | 316740 | 1,00 | down |

|         |         |         |                                     |        |        |      |      |
|---------|---------|---------|-------------------------------------|--------|--------|------|------|
| 5755045 | 7323522 | 1679837 | myosin binding protein C, slow type | Mybpc1 | 362867 | 2,19 | down |
| 5790225 | 7323522 | 1679850 | myosin binding protein C, slow type | Mybpc1 | 362867 | 1,24 | up   |
| 5795905 | 7323522 | 1679858 | myosin binding protein C, slow type | Mybpc1 | 362867 | 1,25 | down |
| 5825852 | 7323522 | 1679846 | myosin binding protein C, slow type | Mybpc1 | 362867 | 1,09 | down |
| 5828641 | 7323522 | 1679856 | myosin binding protein C, slow type | Mybpc1 | 362867 | 1,01 | up   |
| 5864357 | 7323522 | 1679831 | myosin binding protein C, slow type | Mybpc1 | 362867 | 1,53 | up   |
| 5874457 | 7323522 | 1679845 | myosin binding protein C, slow type | Mybpc1 | 362867 | 1,12 | up   |
| 5894129 | 7323522 | 1679855 | myosin binding protein C, slow type | Mybpc1 | 362867 | 1,18 | down |
| 5924724 | 7323522 | 1679839 | myosin binding protein C, slow type | Mybpc1 | 362867 | 1,36 | down |
| 5935608 | 7323522 | 1679877 | myosin binding protein C, slow type | Mybpc1 | 362867 | 1,18 | down |
| 5940917 | 7323522 | 1679851 | myosin binding protein C, slow type | Mybpc1 | 362867 | 1,54 | up   |
| 5956855 | 7323522 | 1679841 | myosin binding protein C, slow type | Mybpc1 | 362867 | 1,32 | down |
| 5967085 | 7323522 | 1679853 | myosin binding protein C, slow type | Mybpc1 | 362867 | 1,06 | up   |
| 5971246 | 7323522 | 1679866 | myosin binding protein C, slow type | Mybpc1 | 362867 | 1,33 | up   |
| 5976028 | 7323522 | 1679840 | myosin binding protein C, slow type | Mybpc1 | 362867 | 1,67 | down |
| 6025511 | 7323522 | 1679861 | myosin binding protein C, slow type | Mybpc1 | 362867 | 1,30 | down |
| 6031813 | 7323522 | 1679867 | myosin binding protein C, slow type | Mybpc1 | 362867 | 1,62 | down |
| 6211336 | 7323522 | 1679848 | myosin binding protein C, slow type | Mybpc1 | 362867 | 1,81 | up   |
| 6212131 | 7323522 | 1679836 | myosin binding protein C, slow type | Mybpc1 | 362867 | 1,00 | down |
| 6238054 | 7323522 | 1679862 | myosin binding protein C, slow type | Mybpc1 | 362867 | 1,22 | down |
| 6323891 | 7323522 | 1679849 | myosin binding protein C, slow type | Mybpc1 | 362867 | 1,07 | down |
| 6339386 | 7323522 | 1679834 | myosin binding protein C, slow type | Mybpc1 | 362867 | 1,03 | up   |
| 6395574 | 7323522 | 1679843 | myosin binding protein C, slow type | Mybpc1 | 362867 | 1,36 | up   |
| 6468298 | 7323522 | 1679829 | myosin binding protein C, slow type | Mybpc1 | 362867 | 1,04 | down |
| 6470384 | 7323522 | 1679835 | myosin binding protein C, slow type | Mybpc1 | 362867 | 1,26 | up   |
| 6508975 | 7323522 | 1679857 | myosin binding protein C, slow type | Mybpc1 | 362867 | 1,23 | up   |
| 6521148 | 7323522 | 1679838 | myosin binding protein C, slow type | Mybpc1 | 362867 | 1,05 | up   |
| 6536820 | 7323522 | 1679852 | myosin binding protein C, slow type | Mybpc1 | 362867 | 1,19 | down |
| 6620977 | 7323522 | 1679833 | myosin binding protein C, slow type | Mybpc1 | 362867 | 1,47 | down |
| 6643972 | 7323522 | 1679844 | myosin binding protein C, slow type | Mybpc1 | 362867 | 1,36 | up   |
| 5651679 | 7337664 | 1713928 | myosin IE                           | Myole  | 25484  | 1,18 | up   |
| 5696790 | 7337664 | 1713940 | myosin IE                           | Myole  | 25484  | 1,30 | down |
| 5768072 | 7337664 | 1713932 | myosin IE                           | Myole  | 25484  | 1,02 | down |
| 5771257 | 7337664 | 1713927 | myosin IE                           | Myole  | 25484  | 1,34 | up   |
| 5916024 | 7337664 | 1713926 | myosin IE                           | Myole  | 25484  | 1,33 | up   |
| 5965239 | 7337664 | 1713936 | myosin IE                           | Myole  | 25484  | 1,12 | up   |
| 6035516 | 7337664 | 1713930 | myosin IE                           | Myole  | 25484  | 1,27 | up   |
| 6038124 | 7337664 | 1713924 | myosin IE                           | Myole  | 25484  | 1,08 | down |
| 6049192 | 7337664 | 1713935 | myosin IE                           | Myole  | 25484  | 1,05 | up   |
| 6050172 | 7337664 | 1713944 | myosin IE                           | Myole  | 25484  | 1,21 | down |
| 6093823 | 7337664 | 1713925 | myosin IE                           | Myole  | 25484  | 1,33 | down |
| 6109481 | 7337664 | 1713923 | myosin IE                           | Myole  | 25484  | 1,08 | down |
| 6147239 | 7337664 | 1713939 | myosin IE                           | Myole  | 25484  | 1,40 | up   |
| 6161865 | 7337664 | 1713938 | myosin IE                           | Myole  | 25484  | 1,32 | up   |
| 6172491 | 7337664 | 1713934 | myosin IE                           | Myole  | 25484  | 1,04 | up   |
| 6235853 | 7337664 | 1713941 | myosin IE                           | Myole  | 25484  | 1,20 | up   |
| 6295601 | 7337664 | 1713943 | myosin IE                           | Myole  | 25484  | 1,03 | up   |
| 6344754 | 7337664 | 1713941 | myosin IE                           | Myole  | 25484  | 1,75 | down |
| 6449903 | 7337664 | 1713929 | myosin IE                           | Myole  | 25484  | 1,07 | up   |
| 6474452 | 7337664 | 1713920 | myosin IE                           | Myole  | 25484  | 2,58 | up   |
| 6477597 | 7337664 | 1713946 | myosin IE                           | Myole  | 25484  | 1,13 | down |
| 6480562 | 7337664 | 1713922 | myosin IE                           | Myole  | 25484  | 1,09 | up   |
| 6497189 | 7337664 | 1713919 | myosin IE                           | Myole  | 25484  | 1,34 | down |
| 6545403 | 7337664 | 1713931 | myosin IE                           | Myole  | 25484  | 1,30 | down |
| 6579863 | 7337664 | 1713933 | myosin IE                           | Myole  | 25484  | 1,11 | up   |
| 6621205 | 7337664 | 1713942 | myosin IE                           | Myole  | 25484  | 1,53 | up   |

|         |         |         |            |       |        |      |      |
|---------|---------|---------|------------|-------|--------|------|------|
| 6635291 | 7337664 | 1713921 | myosin IE  | Myole | 25484  | 1,25 | up   |
| 6648203 | 7337664 | 1713937 | myosin IE  | Myole | 25484  | 1,16 | up   |
| 6685658 | 7337664 | 1713945 | myosin IE  | Myole | 25484  | 1,15 | down |
| 6708567 | 7337664 | 1713946 | myosin IE  | Myole | 25484  | 1,08 | up   |
| 6730543 | 7337664 | 1713946 | myosin IE  | Myole | 25484  | 1,31 | up   |
| 5624547 | 7312903 | 1654092 | myosin IF  | Myolf | 314654 | 1,15 | up   |
| 5657254 | 7312903 | 1654115 | myosin IF  | Myolf | 314654 | 1,13 | up   |
| 5688974 | 7312903 | 1654090 | myosin IF  | Myolf | 314654 | 1,56 | up   |
| 5697942 | 7312903 | 1654100 | myosin IF  | Myolf | 314654 | 1,07 | up   |
| 5846623 | 7312903 | 1654108 | myosin IF  | Myolf | 314654 | 1,04 | up   |
| 5979120 | 7312903 | 1654109 | myosin IF  | Myolf | 314654 | 1,17 | down |
| 5995077 | 7312903 | 1654094 | myosin IF  | Myolf | 314654 | 1,01 | up   |
| 5999871 | 7312903 | 1654086 | myosin IF  | Myolf | 314654 | 1,55 | down |
| 6004714 | 7312903 | 1654110 | myosin IF  | Myolf | 314654 | 1,07 | up   |
| 6006121 | 7312903 | 1654089 | myosin IF  | Myolf | 314654 | 1,83 | down |
| 6008579 | 7312903 | 1654104 | myosin IF  | Myolf | 314654 | 1,26 | down |
| 6017900 | 7312903 | 1654106 | myosin IF  | Myolf | 314654 | 1,08 | up   |
| 6044566 | 7312903 | 1654088 | myosin IF  | Myolf | 314654 | 1,76 | down |
| 6046775 | 7312903 | 1654087 | myosin IF  | Myolf | 314654 | 1,29 | down |
| 6081706 | 7312903 | 1654118 | myosin IF  | Myolf | 314654 | 1,09 | up   |
| 6086048 | 7312903 | 1654102 | myosin IF  | Myolf | 314654 | 1,26 | up   |
| 6100879 | 7312903 | 1654099 | myosin IF  | Myolf | 314654 | 1,15 | up   |
| 6205897 | 7312903 | 1654103 | myosin IF  | Myolf | 314654 | 1,14 | up   |
| 6280709 | 7312903 | 1654112 | myosin IF  | Myolf | 314654 | 2,04 | down |
| 6332698 | 7312903 | 1654096 | myosin IF  | Myolf | 314654 | 1,42 | up   |
| 6386386 | 7312903 | 1654113 | myosin IF  | Myolf | 314654 | 1,22 | down |
| 6448075 | 7312903 | 1654105 | myosin IF  | Myolf | 314654 | 1,15 | up   |
| 6452001 | 7312903 | 1654111 | myosin IF  | Myolf | 314654 | 1,20 | up   |
| 6495600 | 7312903 | 1654115 | myosin IF  | Myolf | 314654 | 1,83 | down |
| 6533429 | 7312903 | 1654115 | myosin IF  | Myolf | 314654 | 1,06 | up   |
| 6559689 | 7312903 | 1654118 | myosin IF  | Myolf | 314654 | 1,21 | down |
| 6569551 | 7312903 | 1654113 | myosin IF  | Myolf | 314654 | 1,25 | down |
| 6616707 | 7312903 | 1654114 | myosin IF  | Myolf | 314654 | 1,22 | down |
| 6689813 | 7312903 | 1654091 | myosin IF  | Myolf | 314654 | 1,19 | up   |
| 6726930 | 7312903 | 1654116 | myosin IF  | Myolf | 314654 | 1,12 | down |
| 6734354 | 7312903 | 1654093 | myosin IF  | Myolf | 314654 | 1,92 | down |
| 5629953 | 7143988 | 1235994 | myosin IXb | Myo9b | 25486  | 1,04 | down |
| 5634956 | 7143988 | 1235976 | myosin IXb | Myo9b | 25486  | 1,40 | down |
| 5643690 | 7143988 | 1235999 | myosin IXb | Myo9b | 25486  | 1,03 | up   |
| 5700799 | 7143988 | 1235962 | myosin IXb | Myo9b | 25486  | 1,82 | down |
| 5704787 | 7143988 | 1235971 | myosin IXb | Myo9b | 25486  | 1,22 | down |
| 5726976 | 7143988 | 1235963 | myosin IXb | Myo9b | 25486  | 1,00 | up   |
| 5737306 | 7143988 | 1235998 | myosin IXb | Myo9b | 25486  | 1,57 | down |
| 5737589 | 7143988 | 1235983 | myosin IXb | Myo9b | 25486  | 1,46 | down |
| 5755863 | 7143988 | 1235996 | myosin IXb | Myo9b | 25486  | 1,00 | up   |
| 5774097 | 7143988 | 1235979 | myosin IXb | Myo9b | 25486  | 1,31 | up   |
| 5819501 | 7143988 | 1235992 | myosin IXb | Myo9b | 25486  | 1,16 | up   |
| 5856007 | 7143988 | 1235995 | myosin IXb | Myo9b | 25486  | 1,11 | up   |
| 5871497 | 7143988 | 1235984 | myosin IXb | Myo9b | 25486  | 1,12 | up   |
| 5871731 | 7143988 | 1235991 | myosin IXb | Myo9b | 25486  | 1,28 | up   |
| 5872098 | 7143988 | 1235975 | myosin IXb | Myo9b | 25486  | 1,18 | up   |
| 5924104 | 7143988 | 1235990 | myosin IXb | Myo9b | 25486  | 1,21 | up   |
| 5956255 | 7143988 | 1235997 | myosin IXb | Myo9b | 25486  | 1,27 | down |
| 6063306 | 7143988 | 1235972 | myosin IXb | Myo9b | 25486  | 1,02 | up   |
| 6070424 | 7143988 | 1235985 | myosin IXb | Myo9b | 25486  | 1,09 | down |
| 6080379 | 7143988 | 1235980 | myosin IXb | Myo9b | 25486  | 1,07 | down |

|         |         |         |                                                   |       |        |      |      |
|---------|---------|---------|---------------------------------------------------|-------|--------|------|------|
| 6081459 | 7143988 | 1235993 | myosin IXb                                        | Myo9b | 25486  | 1,09 | up   |
| 6083350 | 7143988 | 1235989 | myosin IXb                                        | Myo9b | 25486  | 1,78 | down |
| 6088170 | 7143988 | 1236001 | myosin IXb                                        | Myo9b | 25486  | 1,81 | down |
| 6100258 | 7143988 | 1235965 | myosin IXb                                        | Myo9b | 25486  | 1,17 | down |
| 6149399 | 7143988 | 1235967 | myosin IXb                                        | Myo9b | 25486  | 1,25 | up   |
| 6150476 | 7143988 | 1235968 | myosin IXb                                        | Myo9b | 25486  | 1,22 | up   |
| 6154771 | 7143988 | 1235964 | myosin IXb                                        | Myo9b | 25486  | 1,07 | down |
| 6183899 | 7143988 | 1235977 | myosin IXb                                        | Myo9b | 25486  | 1,22 | up   |
| 6197517 | 7143988 | 1235988 | myosin IXb                                        | Myo9b | 25486  | 1,02 | down |
| 6248134 | 7143988 | 1235962 | myosin IXb                                        | Myo9b | 25486  | 1,06 | up   |
| 6259469 | 7143988 | 1235969 | myosin IXb                                        | Myo9b | 25486  | 1,36 | up   |
| 6269045 | 7143988 | 1235986 | myosin IXb                                        | Myo9b | 25486  | 1,12 | up   |
| 6329253 | 7143988 | 1235973 | myosin IXb                                        | Myo9b | 25486  | 1,13 | up   |
| 6374900 | 7143988 | 1236000 | myosin IXb                                        | Myo9b | 25486  | 1,05 | up   |
| 6397498 | 7143988 | 1235970 | myosin IXb                                        | Myo9b | 25486  | 1,08 | up   |
| 6431626 | 7143988 | 1235985 | myosin IXb                                        | Myo9b | 25486  | 2,18 | down |
| 6490039 | 7143988 | 1235981 | myosin IXb                                        | Myo9b | 25486  | 1,10 | up   |
| 6530125 | 7143988 | 1235982 | myosin IXb                                        | Myo9b | 25486  | 1,01 | down |
| 6576534 | 7143988 | 1235966 | myosin IXb                                        | Myo9b | 25486  | 1,01 | down |
| 6576781 | 7143988 | 1235978 | myosin IXb                                        | Myo9b | 25486  | 1,18 | up   |
| 6588101 | 7143988 | 1235993 | myosin IXb                                        | Myo9b | 25486  | 1,03 | down |
| 6589994 | 7143988 | 1235974 | myosin IXb                                        | Myo9b | 25486  | 1,29 | up   |
| 6689755 | 7143988 | 1235987 | myosin IXb                                        | Myo9b | 25486  | 1,11 | up   |
| 5654810 | 7163002 | 1282276 | myosin regulatory light chain interacting protein | Mylip | 306825 | 1,05 | down |
| 5805087 | 7163002 | 1282278 | myosin regulatory light chain interacting protein | Mylip | 306825 | 1,13 | up   |
| 5851807 | 7163002 | 1282280 | myosin regulatory light chain interacting protein | Mylip | 306825 | 1,34 | down |
| 5904339 | 7163002 | 1282281 | myosin regulatory light chain interacting protein | Mylip | 306825 | 1,21 | up   |
| 6037059 | 7163002 | 1282284 | myosin regulatory light chain interacting protein | Mylip | 306825 | 1,04 | up   |
| 6148636 | 7163002 | 1282284 | myosin regulatory light chain interacting protein | Mylip | 306825 | 2,46 | down |
| 6531460 | 7163002 | 1282277 | myosin regulatory light chain interacting protein | Mylip | 306825 | 1,01 | down |
| 6549085 | 7163002 | 1282279 | myosin regulatory light chain interacting protein | Mylip | 306825 | 1,47 | down |
| 6596673 | 7163002 | 1282277 | myosin regulatory light chain interacting protein | Mylip | 306825 | 1,07 | down |
| 6639576 | 7163002 | 1282275 | myosin regulatory light chain interacting protein | Mylip | 306825 | 1,13 | down |
| 6710545 | 7163002 | 1282277 | myosin regulatory light chain interacting protein | Mylip | 306825 | 1,77 | up   |
| 6724332 | 7163002 | 1282284 | myosin regulatory light chain interacting protein | Mylip | 306825 | 1,21 | down |
| 5627733 | 7338040 | 1714980 | myosin Va                                         | Myo5a | 25017  | 1,05 | down |
| 5649354 | 7338040 | 1714978 | myosin Va                                         | Myo5a | 25017  | 1,02 | up   |
| 5654822 | 7338040 | 1714988 | myosin Va                                         | Myo5a | 25017  | 1,01 | up   |
| 5760128 | 7338040 | 1714969 | myosin Va                                         | Myo5a | 25017  | 1,15 | down |
| 5771595 | 7338040 | 1714961 | myosin Va                                         | Myo5a | 25017  | 1,00 | up   |
| 5788970 | 7338040 | 1714965 | myosin Va                                         | Myo5a | 25017  | 1,02 | up   |
| 5852735 | 7338040 | 1714986 | myosin Va                                         | Myo5a | 25017  | 1,24 | down |
| 5859152 | 7338040 | 1714977 | myosin Va                                         | Myo5a | 25017  | 1,12 | up   |
| 5866100 | 7338040 | 1714985 | myosin Va                                         | Myo5a | 25017  | 1,35 | up   |
| 5874722 | 7338040 | 1714955 | myosin Va                                         | Myo5a | 25017  | 1,01 | down |
| 5886886 | 7338040 | 1714982 | myosin Va                                         | Myo5a | 25017  | 1,07 | down |
| 5924197 | 7338040 | 1714973 | myosin Va                                         | Myo5a | 25017  | 1,08 | up   |
| 5945867 | 7338040 | 1714976 | myosin Va                                         | Myo5a | 25017  | 1,12 | up   |
| 5948877 | 7338040 | 1714989 | myosin Va                                         | Myo5a | 25017  | 1,02 | down |
| 6101031 | 7338040 | 1714981 | myosin Va                                         | Myo5a | 25017  | 1,00 | up   |
| 6103860 | 7338040 | 1714991 | myosin Va                                         | Myo5a | 25017  | 1,08 | up   |
| 6188329 | 7338040 | 1714987 | myosin Va                                         | Myo5a | 25017  | 1,19 | down |
| 6215608 | 7338040 | 1714958 | myosin Va                                         | Myo5a | 25017  | 1,19 | up   |
| 6224318 | 7338040 | 1714967 | myosin Va                                         | Myo5a | 25017  | 1,08 | down |
| 6234467 | 7338040 | 1714960 | myosin Va                                         | Myo5a | 25017  | 1,13 | up   |
| 6238675 | 7338040 | 1714972 | myosin Va                                         | Myo5a | 25017  | 1,08 | down |

|         |         |         |              |       |        |      |      |
|---------|---------|---------|--------------|-------|--------|------|------|
| 6239107 | 7338040 | 1714957 | myosin Va    | Myo5a | 25017  | 1,17 | up   |
| 6239441 | 7338040 | 1714974 | myosin Va    | Myo5a | 25017  | 1,02 | up   |
| 6268197 | 7338040 | 1714962 | myosin Va    | Myo5a | 25017  | 1,15 | up   |
| 6329962 | 7338040 | 1714979 | myosin Va    | Myo5a | 25017  | 1,39 | down |
| 6331973 | 7338040 | 1714985 | myosin Va    | Myo5a | 25017  | 1,19 | down |
| 6350686 | 7338040 | 1714963 | myosin Va    | Myo5a | 25017  | 2,06 | up   |
| 6411197 | 7338040 | 1714966 | myosin Va    | Myo5a | 25017  | 1,06 | up   |
| 6423203 | 7338040 | 1714968 | myosin Va    | Myo5a | 25017  | 1,24 | down |
| 6446119 | 7338040 | 1714990 | myosin Va    | Myo5a | 25017  | 1,39 | down |
| 6465147 | 7338040 | 1714975 | myosin Va    | Myo5a | 25017  | 1,74 | down |
| 6506936 | 7338040 | 1714983 | myosin Va    | Myo5a | 25017  | 1,27 | down |
| 6589682 | 7338040 | 1714971 | myosin Va    | Myo5a | 25017  | 1,02 | up   |
| 6625325 | 7338040 | 1714959 | myosin Va    | Myo5a | 25017  | 1,04 | up   |
| 6639027 | 7338040 | 1714964 | myosin Va    | Myo5a | 25017  | 1,09 | up   |
| 6678284 | 7338040 | 1714984 | myosin Va    | Myo5a | 25017  | 1,37 | down |
| 6709554 | 7338040 | 1714956 | myosin Va    | Myo5a | 25017  | 1,11 | up   |
| 6712420 | 7338040 | 1714970 | myosin Va    | Myo5a | 25017  | 1,15 | down |
| 5923625 | 7174149 | 1310538 | myosin VIIIb | Myo7b | 498834 | 1,20 | down |
| 6482745 | 7174149 | 1310539 | myosin VIIIb | Myo7b | 498834 | 1,06 | down |
| 5620532 | 7153875 | 1259791 | myosin XVI   | Myo16 | 192253 | 1,56 | up   |
| 5623713 | 7153875 | 1259792 | myosin XVI   | Myo16 | 192253 | 1,29 | up   |
| 5638656 | 7153875 | 1259788 | myosin XVI   | Myo16 | 192253 | 1,05 | down |
| 5655722 | 7153875 | 1259787 | myosin XVI   | Myo16 | 192253 | 1,08 | up   |
| 5657875 | 7153875 | 1259772 | myosin XVI   | Myo16 | 192253 | 1,50 | down |
| 5685388 | 7153875 | 1259780 | myosin XVI   | Myo16 | 192253 | 1,18 | down |
| 5720731 | 7153875 | 1259781 | myosin XVI   | Myo16 | 192253 | 1,21 | down |
| 5731177 | 7153875 | 1259800 | myosin XVI   | Myo16 | 192253 | 1,25 | up   |
| 5739100 | 7153875 | 1259776 | myosin XVI   | Myo16 | 192253 | 1,54 | up   |
| 5746886 | 7153875 | 1259799 | myosin XVI   | Myo16 | 192253 | 1,01 | down |
| 5754258 | 7153875 | 1259774 | myosin XVI   | Myo16 | 192253 | 1,07 | down |
| 5793451 | 7153875 | 1259775 | myosin XVI   | Myo16 | 192253 | 1,56 | up   |
| 5849202 | 7153875 | 1259777 | myosin XVI   | Myo16 | 192253 | 1,05 | down |
| 5889465 | 7153875 | 1259783 | myosin XVI   | Myo16 | 192253 | 1,10 | down |
| 5904292 | 7153875 | 1259797 | myosin XVI   | Myo16 | 192253 | 1,30 | up   |
| 5965477 | 7153875 | 1259795 | myosin XVI   | Myo16 | 192253 | 1,11 | up   |
| 5986517 | 7153875 | 1259775 | myosin XVI   | Myo16 | 192253 | 1,62 | down |
| 5995193 | 7153875 | 1259773 | myosin XVI   | Myo16 | 192253 | 1,05 | up   |
| 6044819 | 7153875 | 1259784 | myosin XVI   | Myo16 | 192253 | 1,46 | down |
| 6113699 | 7153875 | 1259803 | myosin XVI   | Myo16 | 192253 | 1,18 | up   |
| 6123554 | 7153875 | 1259798 | myosin XVI   | Myo16 | 192253 | 1,27 | up   |
| 6129532 | 7153875 | 1259771 | myosin XVI   | Myo16 | 192253 | 2,07 | up   |
| 6144837 | 7153875 | 1259805 | myosin XVI   | Myo16 | 192253 | 1,25 | down |
| 6145417 | 7153875 | 1259807 | myosin XVI   | Myo16 | 192253 | 1,01 | down |
| 6191981 | 7153875 | 1259801 | myosin XVI   | Myo16 | 192253 | 1,24 | up   |
| 6192688 | 7153875 | 1259775 | myosin XVI   | Myo16 | 192253 | 1,63 | down |
| 6210125 | 7153875 | 1259799 | myosin XVI   | Myo16 | 192253 | 1,13 | up   |
| 6215582 | 7153875 | 1259772 | myosin XVI   | Myo16 | 192253 | 1,44 | up   |
| 6228439 | 7153875 | 1259790 | myosin XVI   | Myo16 | 192253 | 1,09 | up   |
| 6292671 | 7153875 | 1259793 | myosin XVI   | Myo16 | 192253 | 1,24 | down |
| 6292817 | 7153875 | 1259778 | myosin XVI   | Myo16 | 192253 | 1,05 | down |
| 6300779 | 7153875 | 1259789 | myosin XVI   | Myo16 | 192253 | 1,73 | down |
| 6337793 | 7153875 | 1259771 | myosin XVI   | Myo16 | 192253 | 1,61 | down |
| 6347495 | 7153875 | 1259774 | myosin XVI   | Myo16 | 192253 | 1,02 | up   |
| 6353839 | 7153875 | 1259771 | myosin XVI   | Myo16 | 192253 | 1,25 | down |
| 6387006 | 7153875 | 1259779 | myosin XVI   | Myo16 | 192253 | 1,48 | down |
| 6409700 | 7153875 | 1259775 | myosin XVI   | Myo16 | 192253 | 1,62 | down |

|         |         |         |                                       |       |        |      |      |
|---------|---------|---------|---------------------------------------|-------|--------|------|------|
| 6446187 | 7153875 | 1259796 | myosin XVI                            | Myo16 | 192253 | 1,13 | up   |
| 6447082 | 7153875 | 1259786 | myosin XVI                            | Myo16 | 192253 | 1,03 | up   |
| 6447165 | 7153875 | 1259785 | myosin XVI                            | Myo16 | 192253 | 1,03 | up   |
| 6525290 | 7153875 | 1259806 | myosin XVI                            | Myo16 | 192253 | 1,60 | up   |
| 6556426 | 7153875 | 1259794 | myosin XVI                            | Myo16 | 192253 | 1,53 | up   |
| 6627582 | 7153875 | 1259782 | myosin XVI                            | Myo16 | 192253 | 2,00 | down |
| 6633210 | 7153875 | 1259796 | myosin XVI                            | Myo16 | 192253 | 1,03 | down |
| 6656394 | 7153875 | 1259804 | myosin XVI                            | Myo16 | 192253 | 1,29 | up   |
| 6725003 | 7153875 | 1259775 | myosin XVI                            | Myo16 | 192253 | 1,11 | up   |
| 6739091 | 7153875 | 1259802 | myosin XVI                            | Myo16 | 192253 | 1,30 | up   |
| 5684806 | 7064468 | 1042343 | myosin, heavy chain 11, smooth muscle | Myh11 | 24582  | 1,38 | up   |
| 5742541 | 7064468 | 1042351 | myosin, heavy chain 11, smooth muscle | Myh11 | 24582  | 1,52 | down |
| 5798434 | 7064468 | 1042347 | myosin, heavy chain 11, smooth muscle | Myh11 | 24582  | 1,64 | down |
| 5852558 | 7064468 | 1042346 | myosin, heavy chain 11, smooth muscle | Myh11 | 24582  | 1,10 | up   |
| 5949871 | 7064468 | 1042337 | myosin, heavy chain 11, smooth muscle | Myh11 | 24582  | 1,02 | up   |
| 5958666 | 7064468 | 1042348 | myosin, heavy chain 11, smooth muscle | Myh11 | 24582  | 1,49 | down |
| 5985381 | 7064468 | 1042360 | myosin, heavy chain 11, smooth muscle | Myh11 | 24582  | 1,10 | down |
| 5996827 | 7064468 | 1042359 | myosin, heavy chain 11, smooth muscle | Myh11 | 24582  | 1,30 | down |
| 5997561 | 7064468 | 1042357 | myosin, heavy chain 11, smooth muscle | Myh11 | 24582  | 1,49 | up   |
| 6013757 | 7064468 | 1042352 | myosin, heavy chain 11, smooth muscle | Myh11 | 24582  | 1,53 | up   |
| 6047053 | 7064468 | 1042338 | myosin, heavy chain 11, smooth muscle | Myh11 | 24582  | 1,16 | up   |
| 6061410 | 7064468 | 1042335 | myosin, heavy chain 11, smooth muscle | Myh11 | 24582  | 1,58 | up   |
| 6247741 | 7064468 | 1042342 | myosin, heavy chain 11, smooth muscle | Myh11 | 24582  | 1,13 | up   |
| 6262359 | 7064468 | 1042350 | myosin, heavy chain 11, smooth muscle | Myh11 | 24582  | 1,06 | up   |
| 6270886 | 7064468 | 1042333 | myosin, heavy chain 11, smooth muscle | Myh11 | 24582  | 1,40 | up   |
| 6280724 | 7064468 | 1042361 | myosin, heavy chain 11, smooth muscle | Myh11 | 24582  | 1,17 | up   |
| 6314524 | 7064468 | 1042336 | myosin, heavy chain 11, smooth muscle | Myh11 | 24582  | 1,02 | up   |
| 6336265 | 7064468 | 1042356 | myosin, heavy chain 11, smooth muscle | Myh11 | 24582  | 1,10 | up   |
| 6413878 | 7064468 | 1042339 | myosin, heavy chain 11, smooth muscle | Myh11 | 24582  | 1,07 | up   |
| 6453717 | 7064468 | 1042362 | myosin, heavy chain 11, smooth muscle | Myh11 | 24582  | 1,05 | up   |
| 6577307 | 7064468 | 1042353 | myosin, heavy chain 11, smooth muscle | Myh11 | 24582  | 1,55 | down |
| 6625160 | 7064468 | 1042345 | myosin, heavy chain 11, smooth muscle | Myh11 | 24582  | 1,10 | down |
| 6653197 | 7064468 | 1042340 | myosin, heavy chain 11, smooth muscle | Myh11 | 24582  | 1,39 | up   |
| 6713591 | 7064468 | 1042344 | myosin, heavy chain 11, smooth muscle | Myh11 | 24582  | 1,25 | down |
| 6720390 | 7064468 | 1042355 | myosin, heavy chain 11, smooth muscle | Myh11 | 24582  | 1,10 | down |
| 6731705 | 7064468 | 1042341 | myosin, heavy chain 11, smooth muscle | Myh11 | 24582  | 1,07 | down |
| 6746057 | 7064468 | 1042375 | myosin, heavy chain 11, smooth muscle | Myh11 | 24582  | 2,37 | up   |
| 5633829 | 7050710 | 1011184 | myosin, heavy chain 14                | Myh14 | 308572 | 1,09 | up   |
| 5644167 | 7050710 | 1011202 | myosin, heavy chain 14                | Myh14 | 308572 | 1,06 | down |
| 5645622 | 7050710 | 1011170 | myosin, heavy chain 14                | Myh14 | 308572 | 1,06 | up   |
| 5647911 | 7050710 | 1011175 | myosin, heavy chain 14                | Myh14 | 308572 | 1,64 | up   |
| 5694408 | 7050710 | 1011194 | myosin, heavy chain 14                | Myh14 | 308572 | 1,28 | down |
| 5716105 | 7050710 | 1011196 | myosin, heavy chain 14                | Myh14 | 308572 | 1,74 | up   |
| 5803520 | 7050710 | 1011192 | myosin, heavy chain 14                | Myh14 | 308572 | 1,28 | down |
| 5907264 | 7050710 | 1011201 | myosin, heavy chain 14                | Myh14 | 308572 | 1,00 | up   |
| 6001466 | 7050710 | 1011199 | myosin, heavy chain 14                | Myh14 | 308572 | 1,31 | up   |
| 6021291 | 7050710 | 1011167 | myosin, heavy chain 14                | Myh14 | 308572 | 2,72 | down |
| 6026678 | 7050710 | 1011171 | myosin, heavy chain 14                | Myh14 | 308572 | 1,20 | up   |
| 6126171 | 7050710 | 1011211 | myosin, heavy chain 14                | Myh14 | 308572 | 1,03 | up   |
| 6131028 | 7050710 | 1011193 | myosin, heavy chain 14                | Myh14 | 308572 | 1,07 | down |
| 6174980 | 7050710 | 1011197 | myosin, heavy chain 14                | Myh14 | 308572 | 1,30 | up   |
| 6189050 | 7050710 | 1011198 | myosin, heavy chain 14                | Myh14 | 308572 | 1,56 | down |
| 6203864 | 7050710 | 1011203 | myosin, heavy chain 14                | Myh14 | 308572 | 1,23 | down |
| 6213955 | 7050710 | 1011176 | myosin, heavy chain 14                | Myh14 | 308572 | 1,04 | up   |
| 6261033 | 7050710 | 1011177 | myosin, heavy chain 14                | Myh14 | 308572 | 1,16 | up   |
| 6293646 | 7050710 | 1011185 | myosin, heavy chain 14                | Myh14 | 308572 | 1,39 | down |

|         |         |         |                                                   |       |        |      |      |
|---------|---------|---------|---------------------------------------------------|-------|--------|------|------|
| 6309005 | 7050710 | 1011174 | myosin, heavy chain 14                            | Myh14 | 308572 | 1,01 | up   |
| 6321332 | 7050710 | 1011187 | myosin, heavy chain 14                            | Myh14 | 308572 | 1,23 | up   |
| 6353035 | 7050710 | 1011172 | myosin, heavy chain 14                            | Myh14 | 308572 | 1,38 | up   |
| 6357260 | 7050710 | 1011182 | myosin, heavy chain 14                            | Myh14 | 308572 | 1,67 | down |
| 6376231 | 7050710 | 1011186 | myosin, heavy chain 14                            | Myh14 | 308572 | 2,59 | down |
| 6484780 | 7050710 | 1011207 | myosin, heavy chain 14                            | Myh14 | 308572 | 1,53 | up   |
| 6514741 | 7050710 | 1011168 | myosin, heavy chain 14                            | Myh14 | 308572 | 1,22 | down |
| 6519851 | 7050710 | 1011204 | myosin, heavy chain 14                            | Myh14 | 308572 | 1,22 | up   |
| 6540598 | 7050710 | 1011205 | myosin, heavy chain 14                            | Myh14 | 308572 | 1,89 | down |
| 6548359 | 7050710 | 1011181 | myosin, heavy chain 14                            | Myh14 | 308572 | 1,09 | up   |
| 6579962 | 7050710 | 1011178 | myosin, heavy chain 14                            | Myh14 | 308572 | 1,03 | up   |
| 6589762 | 7050710 | 1011206 | myosin, heavy chain 14                            | Myh14 | 308572 | 1,84 | down |
| 6634491 | 7050710 | 1011190 | myosin, heavy chain 14                            | Myh14 | 308572 | 1,08 | up   |
| 6695173 | 7050710 | 1011180 | myosin, heavy chain 14                            | Myh14 | 308572 | 1,05 | down |
| 6706767 | 7050710 | 1011191 | myosin, heavy chain 14                            | Myh14 | 308572 | 1,08 | up   |
| 6727173 | 7050710 | 1011188 | myosin, heavy chain 14                            | Myh14 | 308572 | 1,17 | down |
| 6732247 | 7050710 | 1011169 | myosin, heavy chain 14                            | Myh14 | 308572 | 1,17 | up   |
| 6732895 | 7050710 | 1011195 | myosin, heavy chain 14                            | Myh14 | 308572 | 1,05 | down |
| 6743038 | 7050710 | 1011179 | myosin, heavy chain 14                            | Myh14 | 308572 | 1,03 | down |
| 5649094 | 7068721 | 1052929 | myosin, heavy chain 3, skeletal muscle, embryonic | Myh3  | 24583  | 1,99 | down |
| 5678531 | 7068721 | 1052961 | myosin, heavy chain 3, skeletal muscle, embryonic | Myh3  | 24583  | 1,13 | down |
| 5758863 | 7068721 | 1052955 | myosin, heavy chain 3, skeletal muscle, embryonic | Myh3  | 24583  | 1,01 | up   |
| 5800461 | 7068721 | 1052931 | myosin, heavy chain 3, skeletal muscle, embryonic | Myh3  | 24583  | 1,33 | down |
| 5841751 | 7068721 | 1052924 | myosin, heavy chain 3, skeletal muscle, embryonic | Myh3  | 24583  | 1,52 | up   |
| 5876660 | 7068721 | 1052945 | myosin, heavy chain 3, skeletal muscle, embryonic | Myh3  | 24583  | 1,10 | up   |
| 5886871 | 7068721 | 1052936 | myosin, heavy chain 3, skeletal muscle, embryonic | Myh3  | 24583  | 1,02 | up   |
| 5899381 | 7068721 | 1052941 | myosin, heavy chain 3, skeletal muscle, embryonic | Myh3  | 24583  | 1,02 | up   |
| 5943369 | 7068721 | 1052960 | myosin, heavy chain 3, skeletal muscle, embryonic | Myh3  | 24583  | 1,12 | down |
| 5958831 | 7068721 | 1052952 | myosin, heavy chain 3, skeletal muscle, embryonic | Myh3  | 24583  | 2,44 | down |
| 6100996 | 7068721 | 1052959 | myosin, heavy chain 3, skeletal muscle, embryonic | Myh3  | 24583  | 1,34 | down |
| 6110248 | 7068721 | 1052940 | myosin, heavy chain 3, skeletal muscle, embryonic | Myh3  | 24583  | 1,10 | up   |
| 6120021 | 7068721 | 1052962 | myosin, heavy chain 3, skeletal muscle, embryonic | Myh3  | 24583  | 1,01 | down |
| 6125210 | 7068721 | 1052951 | myosin, heavy chain 3, skeletal muscle, embryonic | Myh3  | 24583  | 1,03 | up   |
| 6185404 | 7068721 | 1052925 | myosin, heavy chain 3, skeletal muscle, embryonic | Myh3  | 24583  | 1,13 | up   |
| 6197636 | 7068721 | 1052928 | myosin, heavy chain 3, skeletal muscle, embryonic | Myh3  | 24583  | 1,43 | down |
| 6197721 | 7068721 | 1052935 | myosin, heavy chain 3, skeletal muscle, embryonic | Myh3  | 24583  | 1,07 | down |
| 6200619 | 7068721 | 1052933 | myosin, heavy chain 3, skeletal muscle, embryonic | Myh3  | 24583  | 1,05 | up   |
| 6245032 | 7068721 | 1052948 | myosin, heavy chain 3, skeletal muscle, embryonic | Myh3  | 24583  | 1,61 | down |
| 6282040 | 7068721 | 1052943 | myosin, heavy chain 3, skeletal muscle, embryonic | Myh3  | 24583  | 1,35 | down |
| 6323708 | 7068721 | 1052944 | myosin, heavy chain 3, skeletal muscle, embryonic | Myh3  | 24583  | 1,43 | up   |
| 6327538 | 7068721 | 1052947 | myosin, heavy chain 3, skeletal muscle, embryonic | Myh3  | 24583  | 1,07 | down |
| 6335298 | 7068721 | 1052932 | myosin, heavy chain 3, skeletal muscle, embryonic | Myh3  | 24583  | 1,03 | down |
| 6359662 | 7068721 | 1052939 | myosin, heavy chain 3, skeletal muscle, embryonic | Myh3  | 24583  | 1,04 | down |
| 6372804 | 7068721 | 1052958 | myosin, heavy chain 3, skeletal muscle, embryonic | Myh3  | 24583  | 1,21 | up   |
| 6375437 | 7068721 | 1052938 | myosin, heavy chain 3, skeletal muscle, embryonic | Myh3  | 24583  | 1,13 | down |
| 6412000 | 7068721 | 1052930 | myosin, heavy chain 3, skeletal muscle, embryonic | Myh3  | 24583  | 1,11 | up   |
| 6416122 | 7068721 | 1052942 | myosin, heavy chain 3, skeletal muscle, embryonic | Myh3  | 24583  | 1,64 | down |
| 6425152 | 7068721 | 1052953 | myosin, heavy chain 3, skeletal muscle, embryonic | Myh3  | 24583  | 1,26 | down |
| 6440068 | 7068721 | 1052950 | myosin, heavy chain 3, skeletal muscle, embryonic | Myh3  | 24583  | 1,08 | down |
| 6454405 | 7068721 | 1052927 | myosin, heavy chain 3, skeletal muscle, embryonic | Myh3  | 24583  | 1,12 | down |
| 6456567 | 7068721 | 1052954 | myosin, heavy chain 3, skeletal muscle, embryonic | Myh3  | 24583  | 1,14 | up   |
| 6522559 | 7068721 | 1052957 | myosin, heavy chain 3, skeletal muscle, embryonic | Myh3  | 24583  | 1,16 | up   |
| 6549347 | 7068721 | 1052956 | myosin, heavy chain 3, skeletal muscle, embryonic | Myh3  | 24583  | 1,10 | up   |
| 6567806 | 7068721 | 1052926 | myosin, heavy chain 3, skeletal muscle, embryonic | Myh3  | 24583  | 1,04 | up   |
| 6621804 | 7068721 | 1052937 | myosin, heavy chain 3, skeletal muscle, embryonic | Myh3  | 24583  | 1,06 | down |
| 6629516 | 7068721 | 1052938 | myosin, heavy chain 3, skeletal muscle, embryonic | Myh3  | 24583  | 1,27 | up   |

|         |         |         |                                                   |      |       |      |      |
|---------|---------|---------|---------------------------------------------------|------|-------|------|------|
| 6630111 | 7068721 | 1052946 | myosin, heavy chain 3, skeletal muscle, embryonic | Myh3 | 24583 | 1,03 | up   |
| 6643299 | 7068721 | 1052949 | myosin, heavy chain 3, skeletal muscle, embryonic | Myh3 | 24583 | 1,16 | down |
| 6662061 | 7068721 | 1052963 | myosin, heavy chain 3, skeletal muscle, embryonic | Myh3 | 24583 | 1,15 | up   |
| 6732979 | 7068721 | 1052934 | myosin, heavy chain 3, skeletal muscle, embryonic | Myh3 | 24583 | 1,68 | down |
| 5621226 | 7138120 | 1221398 | myosin, heavy chain 6, cardiac muscle, alpha      | Myh6 | 29556 | 1,19 | up   |
| 5653180 | 7138120 | 1221400 | myosin, heavy chain 6, cardiac muscle, alpha      | Myh6 | 29556 | 1,23 | down |
| 5657539 | 7138120 | 1221417 | myosin, heavy chain 6, cardiac muscle, alpha      | Myh6 | 29556 | 1,08 | up   |
| 5667624 | 7138120 | 1221410 | myosin, heavy chain 6, cardiac muscle, alpha      | Myh6 | 29556 | 1,17 | up   |
| 5667646 | 7138120 | 1221415 | myosin, heavy chain 6, cardiac muscle, alpha      | Myh6 | 29556 | 1,06 | up   |
| 5740219 | 7138120 | 1221404 | myosin, heavy chain 6, cardiac muscle, alpha      | Myh6 | 29556 | 1,14 | down |
| 5761778 | 7138120 | 1221406 | myosin, heavy chain 6, cardiac muscle, alpha      | Myh6 | 29556 | 1,05 | up   |
| 5778776 | 7138120 | 1221416 | myosin, heavy chain 6, cardiac muscle, alpha      | Myh6 | 29556 | 1,05 | down |
| 5821346 | 7138120 | 1221400 | myosin, heavy chain 6, cardiac muscle, alpha      | Myh6 | 29556 | 1,01 | up   |
| 5831224 | 7138120 | 1221423 | myosin, heavy chain 6, cardiac muscle, alpha      | Myh6 | 29556 | 1,14 | down |
| 5850100 | 7138120 | 1221408 | myosin, heavy chain 6, cardiac muscle, alpha      | Myh6 | 29556 | 1,33 | down |
| 5864937 | 7138120 | 1221429 | myosin, heavy chain 6, cardiac muscle, alpha      | Myh6 | 29556 | 1,26 | up   |
| 5864982 | 7138120 | 1221426 | myosin, heavy chain 6, cardiac muscle, alpha      | Myh6 | 29556 | 1,09 | down |
| 5866994 | 7138120 | 1221411 | myosin, heavy chain 6, cardiac muscle, alpha      | Myh6 | 29556 | 1,01 | down |
| 5867264 | 7138120 | 1221432 | myosin, heavy chain 6, cardiac muscle, alpha      | Myh6 | 29556 | 1,07 | down |
| 5914494 | 7138120 | 1221431 | myosin, heavy chain 6, cardiac muscle, alpha      | Myh6 | 29556 | 1,61 | down |
| 5926496 | 7138120 | 1221428 | myosin, heavy chain 6, cardiac muscle, alpha      | Myh6 | 29556 | 1,85 | up   |
| 5962893 | 7138120 | 1221401 | myosin, heavy chain 6, cardiac muscle, alpha      | Myh6 | 29556 | 1,27 | up   |
| 6034163 | 7138120 | 1221399 | myosin, heavy chain 6, cardiac muscle, alpha      | Myh6 | 29556 | 1,08 | up   |
| 6038599 | 7138120 | 1221420 | myosin, heavy chain 6, cardiac muscle, alpha      | Myh6 | 29556 | 1,10 | down |
| 6118701 | 7138120 | 1221409 | myosin, heavy chain 6, cardiac muscle, alpha      | Myh6 | 29556 | 1,36 | down |
| 6120008 | 7138120 | 1221412 | myosin, heavy chain 6, cardiac muscle, alpha      | Myh6 | 29556 | 1,16 | up   |
| 6172283 | 7138120 | 1221413 | myosin, heavy chain 6, cardiac muscle, alpha      | Myh6 | 29556 | 1,05 | down |
| 6215322 | 7138120 | 1221403 | myosin, heavy chain 6, cardiac muscle, alpha      | Myh6 | 29556 | 1,06 | down |
| 6223973 | 7138120 | 1221433 | myosin, heavy chain 6, cardiac muscle, alpha      | Myh6 | 29556 | 1,03 | down |
| 6257053 | 7138120 | 1221425 | myosin, heavy chain 6, cardiac muscle, alpha      | Myh6 | 29556 | 1,01 | down |
| 6263428 | 7138120 | 1221407 | myosin, heavy chain 6, cardiac muscle, alpha      | Myh6 | 29556 | 1,18 | down |
| 6271786 | 7138120 | 1221427 | myosin, heavy chain 6, cardiac muscle, alpha      | Myh6 | 29556 | 1,23 | down |
| 6326032 | 7138120 | 1221422 | myosin, heavy chain 6, cardiac muscle, alpha      | Myh6 | 29556 | 2,02 | up   |
| 6466448 | 7138120 | 1221424 | myosin, heavy chain 6, cardiac muscle, alpha      | Myh6 | 29556 | 1,93 | up   |
| 6468802 | 7138120 | 1221418 | myosin, heavy chain 6, cardiac muscle, alpha      | Myh6 | 29556 | 1,08 | up   |
| 6472824 | 7138120 | 1221419 | myosin, heavy chain 6, cardiac muscle, alpha      | Myh6 | 29556 | 1,28 | up   |
| 6498672 | 7138120 | 1221402 | myosin, heavy chain 6, cardiac muscle, alpha      | Myh6 | 29556 | 2,76 | down |
| 6526220 | 7138120 | 1221405 | myosin, heavy chain 6, cardiac muscle, alpha      | Myh6 | 29556 | 1,29 | up   |
| 6537512 | 7138120 | 1221430 | myosin, heavy chain 6, cardiac muscle, alpha      | Myh6 | 29556 | 1,19 | down |
| 6594441 | 7138120 | 1221397 | myosin, heavy chain 6, cardiac muscle, alpha      | Myh6 | 29556 | 1,12 | up   |
| 6692782 | 7138120 | 1221414 | myosin, heavy chain 6, cardiac muscle, alpha      | Myh6 | 29556 | 1,18 | down |
| 6703908 | 7138120 | 1221421 | myosin, heavy chain 6, cardiac muscle, alpha      | Myh6 | 29556 | 1,74 | up   |
| 5666907 | 7138131 | 1221459 | myosin, heavy chain 7, cardiac muscle, beta       | Myh7 | 29557 | 1,14 | up   |
| 5675427 | 7138131 | 1221482 | myosin, heavy chain 7, cardiac muscle, beta       | Myh7 | 29557 | 1,00 | up   |
| 5741809 | 7138131 | 1221486 | myosin, heavy chain 7, cardiac muscle, beta       | Myh7 | 29557 | 1,02 | down |
| 5775979 | 7138131 | 1221477 | myosin, heavy chain 7, cardiac muscle, beta       | Myh7 | 29557 | 1,63 | down |
| 5814561 | 7138131 | 1221461 | myosin, heavy chain 7, cardiac muscle, beta       | Myh7 | 29557 | 1,29 | up   |
| 5907317 | 7138131 | 1221470 | myosin, heavy chain 7, cardiac muscle, beta       | Myh7 | 29557 | 1,27 | down |
| 5917597 | 7138131 | 1221493 | myosin, heavy chain 7, cardiac muscle, beta       | Myh7 | 29557 | 1,09 | down |
| 5920935 | 7138131 | 1221490 | myosin, heavy chain 7, cardiac muscle, beta       | Myh7 | 29557 | 1,01 | up   |
| 5928215 | 7138131 | 1221496 | myosin, heavy chain 7, cardiac muscle, beta       | Myh7 | 29557 | 1,09 | down |
| 5945371 | 7138131 | 1221467 | myosin, heavy chain 7, cardiac muscle, beta       | Myh7 | 29557 | 1,24 | down |
| 5975127 | 7138131 | 1221469 | myosin, heavy chain 7, cardiac muscle, beta       | Myh7 | 29557 | 1,95 | down |
| 5991924 | 7138131 | 1221475 | myosin, heavy chain 7, cardiac muscle, beta       | Myh7 | 29557 | 1,08 | down |
| 6012814 | 7138131 | 1221489 | myosin, heavy chain 7, cardiac muscle, beta       | Myh7 | 29557 | 1,30 | up   |
| 6015781 | 7138131 | 1221492 | myosin, heavy chain 7, cardiac muscle, beta       | Myh7 | 29557 | 1,66 | up   |



|         |         |         |                                                   |      |        |      |      |
|---------|---------|---------|---------------------------------------------------|------|--------|------|------|
| 6064763 | 7138131 | 1221474 | myosin, heavy chain 7, cardiac muscle, beta       | Myh7 | 29557  | 1,04 | up   |
| 6076509 | 7138131 | 1221471 | myosin, heavy chain 7, cardiac muscle, beta       | Myh7 | 29557  | 1,07 | down |
| 6091557 | 7138131 | 1221465 | myosin, heavy chain 7, cardiac muscle, beta       | Myh7 | 29557  | 1,15 | down |
| 6180960 | 7138131 | 1221462 | myosin, heavy chain 7, cardiac muscle, beta       | Myh7 | 29557  | 1,68 | up   |
| 6188949 | 7138131 | 1221479 | myosin, heavy chain 7, cardiac muscle, beta       | Myh7 | 29557  | 1,01 | up   |
| 6190330 | 7138131 | 1221494 | myosin, heavy chain 7, cardiac muscle, beta       | Myh7 | 29557  | 1,09 | up   |
| 6299143 | 7138131 | 1221464 | myosin, heavy chain 7, cardiac muscle, beta       | Myh7 | 29557  | 2,30 | up   |
| 6317949 | 7138131 | 1221487 | myosin, heavy chain 7, cardiac muscle, beta       | Myh7 | 29557  | 1,73 | down |
| 6335263 | 7138131 | 1221485 | myosin, heavy chain 7, cardiac muscle, beta       | Myh7 | 29557  | 1,05 | down |
| 6336314 | 7138131 | 1221488 | myosin, heavy chain 7, cardiac muscle, beta       | Myh7 | 29557  | 1,65 | up   |
| 6340036 | 7138131 | 1221495 | myosin, heavy chain 7, cardiac muscle, beta       | Myh7 | 29557  | 1,06 | down |
| 6386153 | 7138131 | 1221485 | myosin, heavy chain 7, cardiac muscle, beta       | Myh7 | 29557  | 1,04 | up   |
| 6412708 | 7138131 | 1221481 | myosin, heavy chain 7, cardiac muscle, beta       | Myh7 | 29557  | 1,03 | up   |
| 6421636 | 7138131 | 1221473 | myosin, heavy chain 7, cardiac muscle, beta       | Myh7 | 29557  | 1,12 | up   |
| 6438593 | 7138131 | 1221483 | myosin, heavy chain 7, cardiac muscle, beta       | Myh7 | 29557  | 1,03 | up   |
| 6458367 | 7138131 | 1221472 | myosin, heavy chain 7, cardiac muscle, beta       | Myh7 | 29557  | 1,27 | up   |
| 6473376 | 7138131 | 1221468 | myosin, heavy chain 7, cardiac muscle, beta       | Myh7 | 29557  | 1,07 | down |
| 6474035 | 7138131 | 1221460 | myosin, heavy chain 7, cardiac muscle, beta       | Myh7 | 29557  | 1,04 | down |
| 6564027 | 7138131 | 1221466 | myosin, heavy chain 7, cardiac muscle, beta       | Myh7 | 29557  | 1,34 | down |
| 6564156 | 7138131 | 1221478 | myosin, heavy chain 7, cardiac muscle, beta       | Myh7 | 29557  | 1,01 | up   |
| 6564365 | 7138131 | 1221476 | myosin, heavy chain 7, cardiac muscle, beta       | Myh7 | 29557  | 1,34 | down |
| 6604672 | 7138131 | 1221484 | myosin, heavy chain 7, cardiac muscle, beta       | Myh7 | 29557  | 1,04 | down |
| 6614495 | 7138131 | 1221497 | myosin, heavy chain 7, cardiac muscle, beta       | Myh7 | 29557  | 1,37 | down |
| 6626280 | 7138131 | 1221480 | myosin, heavy chain 7, cardiac muscle, beta       | Myh7 | 29557  | 1,37 | down |
| 5783180 | 7068853 | 1053138 | myosin, heavy chain 8, skeletal muscle, perinatal | Myh8 | 252942 | 1,33 | down |
| 5878315 | 7068853 | 1053134 | myosin, heavy chain 8, skeletal muscle, perinatal | Myh8 | 252942 | 1,00 | up   |
| 5947657 | 7068853 | 1053135 | myosin, heavy chain 8, skeletal muscle, perinatal | Myh8 | 252942 | 1,01 | up   |
| 6198137 | 7068853 | 1053136 | myosin, heavy chain 8, skeletal muscle, perinatal | Myh8 | 252942 | 1,08 | up   |
| 6281558 | 7068853 | 1053133 | myosin, heavy chain 8, skeletal muscle, perinatal | Myh8 | 252942 | 1,08 | up   |
| 6588944 | 7068853 | 1053132 | myosin, heavy chain 8, skeletal muscle, perinatal | Myh8 | 252942 | 1,37 | down |
| 6638674 | 7068853 | 1053137 | myosin, heavy chain 8, skeletal muscle, perinatal | Myh8 | 252942 | 1,24 | up   |
| 5631447 | 7329513 | 1694282 | myosin, heavy chain 9, non-muscle                 | Myh9 | 25745  | 1,03 | down |
| 5642272 | 7329513 | 1694267 | myosin, heavy chain 9, non-muscle                 | Myh9 | 25745  | 1,68 | down |
| 5670927 | 7329513 | 1694268 | myosin, heavy chain 9, non-muscle                 | Myh9 | 25745  | 1,11 | up   |
| 5678228 | 7329513 | 1694255 | myosin, heavy chain 9, non-muscle                 | Myh9 | 25745  | 1,02 | down |
| 5679739 | 7329513 | 1694287 | myosin, heavy chain 9, non-muscle                 | Myh9 | 25745  | 1,14 | down |
| 5692106 | 7329513 | 1694261 | myosin, heavy chain 9, non-muscle                 | Myh9 | 25745  | 1,03 | up   |
| 5723316 | 7329513 | 1694273 | myosin, heavy chain 9, non-muscle                 | Myh9 | 25745  | 1,22 | up   |
| 5737441 | 7329513 | 1694269 | myosin, heavy chain 9, non-muscle                 | Myh9 | 25745  | 1,08 | down |
| 5781796 | 7329513 | 1694290 | myosin, heavy chain 9, non-muscle                 | Myh9 | 25745  | 1,11 | down |
| 5848690 | 7329513 | 1694279 | myosin, heavy chain 9, non-muscle                 | Myh9 | 25745  | 1,15 | up   |
| 5908032 | 7329513 | 1694293 | myosin, heavy chain 9, non-muscle                 | Myh9 | 25745  | 1,35 | down |
| 5961575 | 7329513 | 1694281 | myosin, heavy chain 9, non-muscle                 | Myh9 | 25745  | 1,04 | up   |
| 5965451 | 7329513 | 1694262 | myosin, heavy chain 9, non-muscle                 | Myh9 | 25745  | 1,12 | down |
| 5968797 | 7329513 | 1694295 | myosin, heavy chain 9, non-muscle                 | Myh9 | 25745  | 1,03 | up   |
| 6010644 | 7329513 | 1694265 | myosin, heavy chain 9, non-muscle                 | Myh9 | 25745  | 1,08 | down |
| 6037383 | 7329513 | 1694254 | myosin, heavy chain 9, non-muscle                 | Myh9 | 25745  | 1,02 | up   |
| 6058777 | 7329513 | 1694256 | myosin, heavy chain 9, non-muscle                 | Myh9 | 25745  | 1,07 | up   |
| 6130674 | 7329513 | 1694272 | myosin, heavy chain 9, non-muscle                 | Myh9 | 25745  | 1,57 | up   |
| 6188307 | 7329513 | 1694280 | myosin, heavy chain 9, non-muscle                 | Myh9 | 25745  | 1,16 | up   |
| 6194346 | 7329513 | 1694275 | myosin, heavy chain 9, non-muscle                 | Myh9 | 25745  | 1,41 | up   |
| 6200199 | 7329513 | 1694291 | myosin, heavy chain 9, non-muscle                 | Myh9 | 25745  | 2,15 | up   |
| 6231030 | 7329513 | 1694283 | myosin, heavy chain 9, non-muscle                 | Myh9 | 25745  | 1,10 | down |
| 6238231 | 7329513 | 1694292 | myosin, heavy chain 9, non-muscle                 | Myh9 | 25745  | 1,07 | up   |
| 6268883 | 7329513 | 1694270 | myosin, heavy chain 9, non-muscle                 | Myh9 | 25745  | 1,32 | down |
| 6281166 | 7329513 | 1694289 | myosin, heavy chain 9, non-muscle                 | Myh9 | 25745  | 1,31 | down |

|         |         |         |                                          |       |        |      |      |
|---------|---------|---------|------------------------------------------|-------|--------|------|------|
| 6320159 | 7329513 | 1694286 | myosin, heavy chain 9, non-muscle        | Myh9  | 25745  | 1,04 | up   |
| 6371851 | 7329513 | 1694291 | myosin, heavy chain 9, non-muscle        | Myh9  | 25745  | 1,03 | down |
| 6381875 | 7329513 | 1694288 | myosin, heavy chain 9, non-muscle        | Myh9  | 25745  | 1,39 | up   |
| 6396027 | 7329513 | 1694274 | myosin, heavy chain 9, non-muscle        | Myh9  | 25745  | 1,09 | up   |
| 6443558 | 7329513 | 1694264 | myosin, heavy chain 9, non-muscle        | Myh9  | 25745  | 1,18 | down |
| 6453520 | 7329513 | 1694271 | myosin, heavy chain 9, non-muscle        | Myh9  | 25745  | 1,11 | up   |
| 6473428 | 7329513 | 1694276 | myosin, heavy chain 9, non-muscle        | Myh9  | 25745  | 1,19 | down |
| 6513326 | 7329513 | 1694257 | myosin, heavy chain 9, non-muscle        | Myh9  | 25745  | 1,05 | down |
| 6516300 | 7329513 | 1694266 | myosin, heavy chain 9, non-muscle        | Myh9  | 25745  | 1,16 | down |
| 6587697 | 7329513 | 1694260 | myosin, heavy chain 9, non-muscle        | Myh9  | 25745  | 1,04 | down |
| 6599673 | 7329513 | 1694259 | myosin, heavy chain 9, non-muscle        | Myh9  | 25745  | 1,24 | down |
| 6618605 | 7329513 | 1694263 | myosin, heavy chain 9, non-muscle        | Myh9  | 25745  | 1,21 | up   |
| 6621748 | 7329513 | 1694285 | myosin, heavy chain 9, non-muscle        | Myh9  | 25745  | 1,05 | up   |
| 6634163 | 7329513 | 1694294 | myosin, heavy chain 9, non-muscle        | Myh9  | 25745  | 1,04 | up   |
| 6651596 | 7329513 | 1694284 | myosin, heavy chain 9, non-muscle        | Myh9  | 25745  | 1,23 | down |
| 6654834 | 7329513 | 1694258 | myosin, heavy chain 9, non-muscle        | Myh9  | 25745  | 1,27 | down |
| 6683527 | 7329513 | 1694278 | myosin, heavy chain 9, non-muscle        | Myh9  | 25745  | 1,10 | down |
| 6700966 | 7329513 | 1694281 | myosin, heavy chain 9, non-muscle        | Myh9  | 25745  | 1,05 | up   |
| 5737109 | 7234529 | 1459639 | myosin, light chain 9, regulatory        | Myl9  | 296313 | 1,11 | up   |
| 5811136 | 7234529 | 1459640 | myosin, light chain 9, regulatory        | Myl9  | 296313 | 2,30 | down |
| 5821165 | 7234529 | 1459641 | myosin, light chain 9, regulatory        | Myl9  | 296313 | 1,21 | up   |
| 6507004 | 7234529 | 1459638 | myosin, light chain 9, regulatory        | Myl9  | 296313 | 1,04 | up   |
| 6712745 | 7234529 | 1459642 | myosin, light chain 9, regulatory        | Myl9  | 296313 | 1,02 | down |
| 5835980 | 7132487 | 1207316 | myotubularin related protein 6           | Mtmr6 | 305935 | 1,06 | up   |
| 5955924 | 7132487 | 1207323 | myotubularin related protein 6           | Mtmr6 | 305935 | 1,20 | up   |
| 6037992 | 7132487 | 1207324 | myotubularin related protein 6           | Mtmr6 | 305935 | 1,21 | up   |
| 6053269 | 7132487 | 1207310 | myotubularin related protein 6           | Mtmr6 | 305935 | 1,01 | down |
| 6055675 | 7132487 | 1207308 | myotubularin related protein 6           | Mtmr6 | 305935 | 1,13 | up   |
| 6326610 | 7132487 | 1207322 | myotubularin related protein 6           | Mtmr6 | 305935 | 1,16 | up   |
| 6363504 | 7132487 | 1207322 | myotubularin related protein 6           | Mtmr6 | 305935 | 1,06 | up   |
| 6367775 | 7132487 | 1207312 | myotubularin related protein 6           | Mtmr6 | 305935 | 1,36 | down |
| 6370100 | 7132487 | 1207320 | myotubularin related protein 6           | Mtmr6 | 305935 | 1,10 | down |
| 6444905 | 7132487 | 1207325 | myotubularin related protein 6           | Mtmr6 | 305935 | 1,14 | up   |
| 6456943 | 7132487 | 1207321 | myotubularin related protein 6           | Mtmr6 | 305935 | 2,20 | down |
| 6475254 | 7132487 | 1207319 | myotubularin related protein 6           | Mtmr6 | 305935 | 1,00 | up   |
| 6550346 | 7132487 | 1207311 | myotubularin related protein 6           | Mtmr6 | 305935 | 1,01 | up   |
| 6628753 | 7132487 | 1207318 | myotubularin related protein 6           | Mtmr6 | 305935 | 1,09 | up   |
| 6689369 | 7132487 | 1207325 | myotubularin related protein 6           | Mtmr6 | 305935 | 1,09 | down |
| 6734909 | 7132487 | 1207313 | myotubularin related protein 6           | Mtmr6 | 305935 | 1,09 | down |
| 5636597 | 7176177 | 1315136 | myozenin 3                               | Myoz3 | 689274 | 1,17 | up   |
| 5861353 | 7092176 | 1108318 | myxovirus (influenza virus) resistance 1 | Mx1   | 24575  | 2,19 | up   |
| 5868485 | 7092176 | 1108316 | myxovirus (influenza virus) resistance 1 | Mx1   | 24575  | 1,06 | down |
| 5897638 | 7092176 | 1108321 | myxovirus (influenza virus) resistance 1 | Mx1   | 24575  | 1,84 | down |
| 5921892 | 7092176 | 1108312 | myxovirus (influenza virus) resistance 1 | Mx1   | 24575  | 1,09 | up   |
| 6002822 | 7092176 | 1108310 | myxovirus (influenza virus) resistance 1 | Mx1   | 24575  | 1,27 | down |
| 6004228 | 7092176 | 1108323 | myxovirus (influenza virus) resistance 1 | Mx1   | 24575  | 2,92 | down |
| 6009201 | 7092176 | 1108315 | myxovirus (influenza virus) resistance 1 | Mx1   | 24575  | 1,11 | up   |
| 6023507 | 7092176 | 1108322 | myxovirus (influenza virus) resistance 1 | Mx1   | 24575  | 1,39 | up   |
| 6099951 | 7092176 | 1108317 | myxovirus (influenza virus) resistance 1 | Mx1   | 24575  | 2,19 | up   |
| 6124690 | 7092176 | 1108311 | myxovirus (influenza virus) resistance 1 | Mx1   | 24575  | 1,48 | down |
| 6197122 | 7092176 | 1108320 | myxovirus (influenza virus) resistance 1 | Mx1   | 24575  | 1,83 | up   |
| 6262990 | 7092176 | 1108316 | myxovirus (influenza virus) resistance 1 | Mx1   | 24575  | 1,03 | up   |
| 6337819 | 7092176 | 1108313 | myxovirus (influenza virus) resistance 1 | Mx1   | 24575  | 1,13 | down |
| 6341613 | 7092176 | 1108319 | myxovirus (influenza virus) resistance 1 | Mx1   | 24575  | 3,16 | down |
| 6452334 | 7092176 | 1108314 | myxovirus (influenza virus) resistance 1 | Mx1   | 24575  | 1,48 | up   |
| 6468573 | 7092176 | 1108323 | myxovirus (influenza virus) resistance 1 | Mx1   | 24575  | 1,82 | down |

|         |         |         |                                                                    |            |        |      |      |
|---------|---------|---------|--------------------------------------------------------------------|------------|--------|------|------|
| 5627139 | 7087207 | 1095967 | myxovirus (influenza virus) resistance 2                           | Mx2        | 286918 | 1,87 | down |
| 5636952 | 7087207 | 1095970 | myxovirus (influenza virus) resistance 2                           | Mx2        | 286918 | 1,28 | down |
| 5641766 | 7087207 | 1095973 | myxovirus (influenza virus) resistance 2                           | Mx2        | 286918 | 1,45 | up   |
| 5645006 | 7087207 | 1095966 | myxovirus (influenza virus) resistance 2                           | Mx2        | 286918 | 4,50 | down |
| 5675888 | 7087207 | 1095973 | myxovirus (influenza virus) resistance 2                           | Mx2        | 286918 | 1,08 | down |
| 5740960 | 7087207 | 1095976 | myxovirus (influenza virus) resistance 2                           | Mx2        | 286918 | 1,14 | down |
| 5901301 | 7087207 | 1095972 | myxovirus (influenza virus) resistance 2                           | Mx2        | 286918 | 6,73 | down |
| 5942659 | 7087207 | 1095977 | myxovirus (influenza virus) resistance 2                           | Mx2        | 286918 | 4,95 | down |
| 6223794 | 7087207 | 1095971 | myxovirus (influenza virus) resistance 2                           | Mx2        | 286918 | 1,28 | up   |
| 6427645 | 7087207 | 1095968 | myxovirus (influenza virus) resistance 2                           | Mx2        | 286918 | 1,06 | up   |
| 6438386 | 7087207 | 1095975 | myxovirus (influenza virus) resistance 2                           | Mx2        | 286918 | 3,17 | up   |
| 6579518 | 7087207 | 1095969 | myxovirus (influenza virus) resistance 2                           | Mx2        | 286918 | 2,00 | down |
| 6690333 | 7087207 | 1095974 | myxovirus (influenza virus) resistance 2                           | Mx2        | 286918 | 2,21 | up   |
| 5654783 | 7065110 | 1044142 | N-acetylglucosamine-1-phosphodiester alpha-N-acetylglucosaminidase | Nagpa      | 360476 | 1,26 | up   |
| 5804924 | 7065110 | 1044144 | N-acetylglucosamine-1-phosphodiester alpha-N-acetylglucosaminidase | Nagpa      | 360476 | 1,75 | down |
| 5825837 | 7065110 | 1044153 | N-acetylglucosamine-1-phosphodiester alpha-N-acetylglucosaminidase | Nagpa      | 360476 | 1,28 | down |
| 5863166 | 7065110 | 1044150 | N-acetylglucosamine-1-phosphodiester alpha-N-acetylglucosaminidase | Nagpa      | 360476 | 1,03 | down |
| 5879718 | 7065110 | 1044153 | N-acetylglucosamine-1-phosphodiester alpha-N-acetylglucosaminidase | Nagpa      | 360476 | 1,94 | down |
| 6005730 | 7065110 | 1044147 | N-acetylglucosamine-1-phosphodiester alpha-N-acetylglucosaminidase | Nagpa      | 360476 | 1,42 | down |
| 6170509 | 7065110 | 1044142 | N-acetylglucosamine-1-phosphodiester alpha-N-acetylglucosaminidase | Nagpa      | 360476 | 1,75 | up   |
| 6408148 | 7065110 | 1044142 | N-acetylglucosamine-1-phosphodiester alpha-N-acetylglucosaminidase | Nagpa      | 360476 | 1,70 | down |
| 6479498 | 7065110 | 1044145 | N-acetylglucosamine-1-phosphodiester alpha-N-acetylglucosaminidase | Nagpa      | 360476 | 1,53 | up   |
| 6518197 | 7065110 | 1044146 | N-acetylglucosamine-1-phosphodiester alpha-N-acetylglucosaminidase | Nagpa      | 360476 | 1,15 | up   |
| 6538882 | 7065110 | 1044152 | N-acetylglucosamine-1-phosphodiester alpha-N-acetylglucosaminidase | Nagpa      | 360476 | 1,23 | up   |
| 6583550 | 7065110 | 1044142 | N-acetylglucosamine-1-phosphodiester alpha-N-acetylglucosaminidase | Nagpa      | 360476 | 1,14 | up   |
| 6625117 | 7065110 | 1044151 | N-acetylglucosamine-1-phosphodiester alpha-N-acetylglucosaminidase | Nagpa      | 360476 | 1,12 | down |
| 6662838 | 7065110 | 1044148 | N-acetylglucosamine-1-phosphodiester alpha-N-acetylglucosaminidase | Nagpa      | 360476 | 2,29 | up   |
| 6724448 | 7065110 | 1044153 | N-acetylglucosamine-1-phosphodiester alpha-N-acetylglucosaminidase | Nagpa      | 360476 | 1,35 | up   |
| 5836535 | 7144389 | 1236778 | NADH dehydrogenase (ubiquinone) 1 alpha subcomplex 13 pseudogene   | Ndufa13-ps | 290671 | 1,07 | up   |
| 5710100 | 7236726 | 1465054 | NADPH oxidase activator 1                                          | Noxa1      | 311793 | 1,03 | up   |
| 5821062 | 7236726 | 1465062 | NADPH oxidase activator 1                                          | Noxa1      | 311793 | 1,17 | up   |
| 5865413 | 7236726 | 1465061 | NADPH oxidase activator 1                                          | Noxa1      | 311793 | 1,26 | down |
| 6093034 | 7236726 | 1465056 | NADPH oxidase activator 1                                          | Noxa1      | 311793 | 1,04 | up   |
| 6098797 | 7236726 | 1465056 | NADPH oxidase activator 1                                          | Noxa1      | 311793 | 1,21 | down |
| 6145086 | 7236726 | 1465057 | NADPH oxidase activator 1                                          | Noxa1      | 311793 | 1,51 | down |
| 6175400 | 7236726 | 1465063 | NADPH oxidase activator 1                                          | Noxa1      | 311793 | 2,13 | down |
| 6346916 | 7236726 | 1465053 | NADPH oxidase activator 1                                          | Noxa1      | 311793 | 1,78 | up   |
| 6401530 | 7236726 | 1465059 | NADPH oxidase activator 1                                          | Noxa1      | 311793 | 1,27 | up   |
| 6464411 | 7236726 | 1465057 | NADPH oxidase activator 1                                          | Noxa1      | 311793 | 1,55 | down |
| 6475435 | 7236726 | 1465065 | NADPH oxidase activator 1                                          | Noxa1      | 311793 | 1,15 | up   |
| 6487537 | 7236726 | 1465060 | NADPH oxidase activator 1                                          | Noxa1      | 311793 | 1,43 | up   |
| 6622598 | 7236726 | 1465055 | NADPH oxidase activator 1                                          | Noxa1      | 311793 | 1,03 | up   |
| 6709275 | 7236726 | 1465065 | NADPH oxidase activator 1                                          | Noxa1      | 311793 | 1,54 | up   |
| 5714547 | 7278272 | 1568776 | nardilysin 1 (N-arginine dibasic convertase)                       | Nrd1       | 25499  | 1,08 | down |
| 5733157 | 7278272 | 1568784 | nardilysin 1 (N-arginine dibasic convertase)                       | Nrd1       | 25499  | 1,05 | up   |
| 5774803 | 7278272 | 1568783 | nardilysin 1 (N-arginine dibasic convertase)                       | Nrd1       | 25499  | 1,18 | up   |
| 5783654 | 7278272 | 1568775 | nardilysin 1 (N-arginine dibasic convertase)                       | Nrd1       | 25499  | 1,05 | up   |
| 5811169 | 7278272 | 1568767 | nardilysin 1 (N-arginine dibasic convertase)                       | Nrd1       | 25499  | 1,40 | up   |
| 5952201 | 7278272 | 1568793 | nardilysin 1 (N-arginine dibasic convertase)                       | Nrd1       | 25499  | 1,21 | down |
| 5963440 | 7278272 | 1568792 | nardilysin 1 (N-arginine dibasic convertase)                       | Nrd1       | 25499  | 1,39 | down |
| 6002016 | 7278272 | 1568774 | nardilysin 1 (N-arginine dibasic convertase)                       | Nrd1       | 25499  | 1,39 | down |
| 6015729 | 7278272 | 1568782 | nardilysin 1 (N-arginine dibasic convertase)                       | Nrd1       | 25499  | 1,01 | up   |
| 6018863 | 7278272 | 1568787 | nardilysin 1 (N-arginine dibasic convertase)                       | Nrd1       | 25499  | 1,10 | down |
| 6099005 | 7278272 | 1568779 | nardilysin 1 (N-arginine dibasic convertase)                       | Nrd1       | 25499  | 1,18 | down |
| 6136157 | 7278272 | 1568781 | nardilysin 1 (N-arginine dibasic convertase)                       | Nrd1       | 25499  | 1,02 | up   |
| 6142922 | 7278272 | 1568785 | nardilysin 1 (N-arginine dibasic convertase)                       | Nrd1       | 25499  | 1,20 | down |

|         |         |         |                                              |         |        |      |      |
|---------|---------|---------|----------------------------------------------|---------|--------|------|------|
| 6185916 | 7278272 | 1568791 | nardilysin 1 (N-arginine dibasic convertase) | Nrd1    | 25499  | 1,36 | up   |
| 6206898 | 7278272 | 1568765 | nardilysin 1 (N-arginine dibasic convertase) | Nrd1    | 25499  | 2,05 | up   |
| 6225231 | 7278272 | 1568771 | nardilysin 1 (N-arginine dibasic convertase) | Nrd1    | 25499  | 1,24 | up   |
| 6227575 | 7278272 | 1568763 | nardilysin 1 (N-arginine dibasic convertase) | Nrd1    | 25499  | 1,47 | up   |
| 6238308 | 7278272 | 1568773 | nardilysin 1 (N-arginine dibasic convertase) | Nrd1    | 25499  | 1,08 | down |
| 6255016 | 7278272 | 1568790 | nardilysin 1 (N-arginine dibasic convertase) | Nrd1    | 25499  | 1,13 | down |
| 6341075 | 7278272 | 1568794 | nardilysin 1 (N-arginine dibasic convertase) | Nrd1    | 25499  | 1,14 | up   |
| 6445500 | 7278272 | 1568780 | nardilysin 1 (N-arginine dibasic convertase) | Nrd1    | 25499  | 1,03 | up   |
| 6453810 | 7278272 | 1568778 | nardilysin 1 (N-arginine dibasic convertase) | Nrd1    | 25499  | 1,47 | down |
| 6455817 | 7278272 | 1568765 | nardilysin 1 (N-arginine dibasic convertase) | Nrd1    | 25499  | 1,09 | up   |
| 6467943 | 7278272 | 1568769 | nardilysin 1 (N-arginine dibasic convertase) | Nrd1    | 25499  | 1,01 | down |
| 6469031 | 7278272 | 1568764 | nardilysin 1 (N-arginine dibasic convertase) | Nrd1    | 25499  | 1,25 | up   |
| 6487362 | 7278272 | 1568786 | nardilysin 1 (N-arginine dibasic convertase) | Nrd1    | 25499  | 1,05 | down |
| 6488571 | 7278272 | 1568765 | nardilysin 1 (N-arginine dibasic convertase) | Nrd1    | 25499  | 1,21 | down |
| 6565026 | 7278272 | 1568766 | nardilysin 1 (N-arginine dibasic convertase) | Nrd1    | 25499  | 1,23 | up   |
| 6644941 | 7278272 | 1568789 | nardilysin 1 (N-arginine dibasic convertase) | Nrd1    | 25499  | 1,31 | down |
| 6658148 | 7278272 | 1568770 | nardilysin 1 (N-arginine dibasic convertase) | Nrd1    | 25499  | 1,03 | down |
| 6674762 | 7278272 | 1568777 | nardilysin 1 (N-arginine dibasic convertase) | Nrd1    | 25499  | 1,17 | up   |
| 6682558 | 7278272 | 1568788 | nardilysin 1 (N-arginine dibasic convertase) | Nrd1    | 25499  | 1,12 | down |
| 6693493 | 7278272 | 1568772 | nardilysin 1 (N-arginine dibasic convertase) | Nrd1    | 25499  | 1,08 | down |
| 6726620 | 7278272 | 1568768 | nardilysin 1 (N-arginine dibasic convertase) | Nrd1    | 25499  | 1,28 | up   |
| 5642065 | 7225455 | 1435745 | nasal embryonic LHRH factor                  | Nelf    | 117536 | 2,17 | down |
| 5650544 | 7225455 | 1435750 | nasal embryonic LHRH factor                  | Nelf    | 117536 | 1,04 | down |
| 5684589 | 7225455 | 1435748 | nasal embryonic LHRH factor                  | Nelf    | 117536 | 1,80 | up   |
| 5735205 | 7225455 | 1435747 | nasal embryonic LHRH factor                  | Nelf    | 117536 | 1,20 | up   |
| 5751835 | 7225455 | 1435737 | nasal embryonic LHRH factor                  | Nelf    | 117536 | 1,04 | down |
| 5823034 | 7225455 | 1435751 | nasal embryonic LHRH factor                  | Nelf    | 117536 | 1,01 | down |
| 6004694 | 7225455 | 1435749 | nasal embryonic LHRH factor                  | Nelf    | 117536 | 1,06 | up   |
| 6015326 | 7225455 | 1435743 | nasal embryonic LHRH factor                  | Nelf    | 117536 | 1,00 | up   |
| 6046120 | 7225455 | 1435744 | nasal embryonic LHRH factor                  | Nelf    | 117536 | 1,65 | down |
| 6059358 | 7225455 | 1435736 | nasal embryonic LHRH factor                  | Nelf    | 117536 | 1,21 | up   |
| 6093347 | 7225455 | 1435741 | nasal embryonic LHRH factor                  | Nelf    | 117536 | 1,09 | up   |
| 6094013 | 7225455 | 1435742 | nasal embryonic LHRH factor                  | Nelf    | 117536 | 1,22 | down |
| 6113564 | 7225455 | 1435735 | nasal embryonic LHRH factor                  | Nelf    | 117536 | 1,19 | down |
| 6129759 | 7225455 | 1435746 | nasal embryonic LHRH factor                  | Nelf    | 117536 | 1,25 | up   |
| 6416039 | 7225455 | 1435740 | nasal embryonic LHRH factor                  | Nelf    | 117536 | 1,25 | up   |
| 6511941 | 7225455 | 1435738 | nasal embryonic LHRH factor                  | Nelf    | 117536 | 1,20 | down |
| 6648468 | 7225455 | 1435739 | nasal embryonic LHRH factor                  | Nelf    | 117536 | 1,02 | down |
| 5620348 | 7321204 | 1675184 | NCK associated protein 1 like                | Nckap11 | 315348 | 1,26 | up   |
| 5628672 | 7321204 | 1675176 | NCK associated protein 1 like                | Nckap11 | 315348 | 1,40 | up   |
| 5674026 | 7321204 | 1675165 | NCK associated protein 1 like                | Nckap11 | 315348 | 1,24 | down |
| 5682535 | 7321204 | 1675163 | NCK associated protein 1 like                | Nckap11 | 315348 | 1,36 | down |
| 5689210 | 7321204 | 1675164 | NCK associated protein 1 like                | Nckap11 | 315348 | 1,35 | down |
| 5732974 | 7321204 | 1675154 | NCK associated protein 1 like                | Nckap11 | 315348 | 1,20 | down |
| 5763329 | 7321204 | 1675173 | NCK associated protein 1 like                | Nckap11 | 315348 | 1,03 | down |
| 5768236 | 7321204 | 1675162 | NCK associated protein 1 like                | Nckap11 | 315348 | 1,39 | down |
| 5809438 | 7321204 | 1675151 | NCK associated protein 1 like                | Nckap11 | 315348 | 1,04 | up   |
| 5839388 | 7321204 | 1675157 | NCK associated protein 1 like                | Nckap11 | 315348 | 1,44 | down |
| 5846909 | 7321204 | 1675180 | NCK associated protein 1 like                | Nckap11 | 315348 | 1,14 | down |
| 5860092 | 7321204 | 1675174 | NCK associated protein 1 like                | Nckap11 | 315348 | 1,16 | up   |
| 5887195 | 7321204 | 1675160 | NCK associated protein 1 like                | Nckap11 | 315348 | 1,21 | down |
| 5903910 | 7321204 | 1675182 | NCK associated protein 1 like                | Nckap11 | 315348 | 1,05 | down |
| 5929349 | 7321204 | 1675152 | NCK associated protein 1 like                | Nckap11 | 315348 | 1,20 | up   |
| 6003530 | 7321204 | 1675169 | NCK associated protein 1 like                | Nckap11 | 315348 | 1,03 | up   |
| 6009483 | 7321204 | 1675157 | NCK associated protein 1 like                | Nckap11 | 315348 | 2,08 | down |
| 6049344 | 7321204 | 1675183 | NCK associated protein 1 like                | Nckap11 | 315348 | 1,05 | up   |

|         |         |         |                               |         |        |      |      |
|---------|---------|---------|-------------------------------|---------|--------|------|------|
| 6178886 | 7321204 | 1675178 | NCK associated protein 1 like | Nckap1l | 315348 | 1,01 | up   |
| 6193392 | 7321204 | 1675166 | NCK associated protein 1 like | Nckap1l | 315348 | 1,10 | down |
| 6199065 | 7321204 | 1675153 | NCK associated protein 1 like | Nckap1l | 315348 | 1,11 | up   |
| 6217196 | 7321204 | 1675182 | NCK associated protein 1 like | Nckap1l | 315348 | 1,25 | up   |
| 6249404 | 7321204 | 1675155 | NCK associated protein 1 like | Nckap1l | 315348 | 1,12 | down |
| 6255880 | 7321204 | 1675171 | NCK associated protein 1 like | Nckap1l | 315348 | 1,06 | up   |
| 6278538 | 7321204 | 1675159 | NCK associated protein 1 like | Nckap1l | 315348 | 1,04 | down |
| 6376586 | 7321204 | 1675158 | NCK associated protein 1 like | Nckap1l | 315348 | 1,01 | up   |
| 6380649 | 7321204 | 1675170 | NCK associated protein 1 like | Nckap1l | 315348 | 1,58 | down |
| 6407805 | 7321204 | 1675167 | NCK associated protein 1 like | Nckap1l | 315348 | 1,13 | up   |
| 6440129 | 7321204 | 1675162 | NCK associated protein 1 like | Nckap1l | 315348 | 2,34 | up   |
| 6625658 | 7321204 | 1675181 | NCK associated protein 1 like | Nckap1l | 315348 | 1,28 | up   |
| 6642668 | 7321204 | 1675161 | NCK associated protein 1 like | Nckap1l | 315348 | 1,04 | down |
| 6661530 | 7321204 | 1675184 | NCK associated protein 1 like | Nckap1l | 315348 | 1,30 | up   |
| 6672008 | 7321204 | 1675168 | NCK associated protein 1 like | Nckap1l | 315348 | 1,08 | up   |
| 6705187 | 7321204 | 1675163 | NCK associated protein 1 like | Nckap1l | 315348 | 1,08 | down |
| 6731107 | 7321204 | 1675177 | NCK associated protein 1 like | Nckap1l | 315348 | 1,01 | up   |
| 5636756 | 7238845 | 1470569 | nebulin                       | Neb     | 311029 | 1,23 | down |
| 5642821 | 7238845 | 1470616 | nebulin                       | Neb     | 311029 | 1,79 | up   |
| 5648245 | 7238845 | 1470715 | nebulin                       | Neb     | 311029 | 1,04 | up   |
| 5651914 | 7238845 | 1470738 | nebulin                       | Neb     | 311029 | 1,61 | down |
| 5654320 | 7238845 | 1470595 | nebulin                       | Neb     | 311029 | 1,00 | up   |
| 5667111 | 7238845 | 1470627 | nebulin                       | Neb     | 311029 | 1,01 | down |
| 5672109 | 7238845 | 1470588 | nebulin                       | Neb     | 311029 | 1,17 | up   |
| 5677216 | 7238845 | 1470583 | nebulin                       | Neb     | 311029 | 1,19 | down |
| 5698620 | 7238845 | 1470674 | nebulin                       | Neb     | 311029 | 1,37 | down |
| 5701482 | 7238845 | 1470671 | nebulin                       | Neb     | 311029 | 1,06 | down |
| 5702775 | 7238845 | 1470711 | nebulin                       | Neb     | 311029 | 1,00 | down |
| 5706486 | 7238845 | 1470676 | nebulin                       | Neb     | 311029 | 1,03 | down |
| 5714084 | 7238845 | 1470701 | nebulin                       | Neb     | 311029 | 1,04 | up   |
| 5721379 | 7238845 | 1470628 | nebulin                       | Neb     | 311029 | 1,15 | up   |
| 5735286 | 7238845 | 1470658 | nebulin                       | Neb     | 311029 | 1,05 | down |
| 5735976 | 7238845 | 1470727 | nebulin                       | Neb     | 311029 | 1,48 | up   |
| 5751980 | 7238845 | 1470742 | nebulin                       | Neb     | 311029 | 1,10 | down |
| 5759290 | 7238845 | 1470663 | nebulin                       | Neb     | 311029 | 1,11 | down |
| 5768722 | 7238845 | 1470704 | nebulin                       | Neb     | 311029 | 1,13 | down |
| 5779827 | 7238845 | 1470650 | nebulin                       | Neb     | 311029 | 1,15 | down |
| 5792616 | 7238845 | 1470716 | nebulin                       | Neb     | 311029 | 1,02 | down |
| 5793618 | 7238845 | 1470649 | nebulin                       | Neb     | 311029 | 1,18 | down |
| 5794194 | 7238845 | 1470675 | nebulin                       | Neb     | 311029 | 1,29 | up   |
| 5799839 | 7238845 | 1470688 | nebulin                       | Neb     | 311029 | 1,08 | up   |
| 5801517 | 7238845 | 1470713 | nebulin                       | Neb     | 311029 | 1,18 | down |
| 5812443 | 7238845 | 1470567 | nebulin                       | Neb     | 311029 | 1,02 | up   |
| 5824324 | 7238845 | 1470567 | nebulin                       | Neb     | 311029 | 1,47 | up   |
| 5825264 | 7238845 | 1470598 | nebulin                       | Neb     | 311029 | 1,00 | up   |
| 5839997 | 7238845 | 1470592 | nebulin                       | Neb     | 311029 | 1,30 | up   |
| 5840466 | 7238845 | 1470585 | nebulin                       | Neb     | 311029 | 1,97 | up   |
| 5845091 | 7238845 | 1470672 | nebulin                       | Neb     | 311029 | 1,18 | up   |
| 5847729 | 7238845 | 1470703 | nebulin                       | Neb     | 311029 | 1,06 | up   |
| 5859904 | 7238845 | 1470631 | nebulin                       | Neb     | 311029 | 1,06 | up   |
| 5867601 | 7238845 | 1470591 | nebulin                       | Neb     | 311029 | 1,01 | down |
| 5867759 | 7238845 | 1470620 | nebulin                       | Neb     | 311029 | 1,24 | up   |
| 5889687 | 7238845 | 1470630 | nebulin                       | Neb     | 311029 | 1,20 | down |
| 5895017 | 7238845 | 1470640 | nebulin                       | Neb     | 311029 | 1,48 | down |
| 5897279 | 7238845 | 1470617 | nebulin                       | Neb     | 311029 | 1,04 | down |
| 5898404 | 7238845 | 1470680 | nebulin                       | Neb     | 311029 | 1,15 | down |

|         |         |         |         |     |        |      |      |
|---------|---------|---------|---------|-----|--------|------|------|
| 5904856 | 7238845 | 1470614 | nebulin | Neb | 311029 | 1,05 | down |
| 5906649 | 7238845 | 1470734 | nebulin | Neb | 311029 | 1,00 | down |
| 5923635 | 7238845 | 1470651 | nebulin | Neb | 311029 | 1,00 | up   |
| 5930123 | 7238845 | 1470707 | nebulin | Neb | 311029 | 1,24 | down |
| 5935843 | 7238845 | 1470636 | nebulin | Neb | 311029 | 1,22 | up   |
| 5939014 | 7238845 | 1470601 | nebulin | Neb | 311029 | 1,00 | up   |
| 5953010 | 7238845 | 1470655 | nebulin | Neb | 311029 | 1,57 | up   |
| 5954911 | 7238845 | 1470664 | nebulin | Neb | 311029 | 1,16 | down |
| 5961171 | 7238845 | 1470660 | nebulin | Neb | 311029 | 1,02 | down |
| 5968619 | 7238845 | 1470641 | nebulin | Neb | 311029 | 1,60 | up   |
| 5970211 | 7238845 | 1470714 | nebulin | Neb | 311029 | 1,21 | down |
| 5982310 | 7238845 | 1470668 | nebulin | Neb | 311029 | 1,41 | down |
| 6000448 | 7238845 | 1470606 | nebulin | Neb | 311029 | 1,01 | up   |
| 6004277 | 7238845 | 1470644 | nebulin | Neb | 311029 | 1,00 | up   |
| 6008375 | 7238845 | 1470635 | nebulin | Neb | 311029 | 1,40 | up   |
| 6009017 | 7238845 | 1470612 | nebulin | Neb | 311029 | 1,22 | down |
| 6015644 | 7238845 | 1470659 | nebulin | Neb | 311029 | 1,30 | up   |
| 6025702 | 7238845 | 1470741 | nebulin | Neb | 311029 | 1,61 | up   |
| 6027613 | 7238845 | 1470666 | nebulin | Neb | 311029 | 1,20 | down |
| 6029542 | 7238845 | 1470561 | nebulin | Neb | 311029 | 1,00 | down |
| 6037224 | 7238845 | 1470586 | nebulin | Neb | 311029 | 1,06 | up   |
| 6050659 | 7238845 | 1470692 | nebulin | Neb | 311029 | 1,00 | up   |
| 6057197 | 7238845 | 1470643 | nebulin | Neb | 311029 | 1,06 | up   |
| 6057931 | 7238845 | 1470729 | nebulin | Neb | 311029 | 1,23 | down |
| 6064895 | 7238845 | 1470625 | nebulin | Neb | 311029 | 1,11 | up   |
| 6078516 | 7238845 | 1470593 | nebulin | Neb | 311029 | 1,05 | down |
| 6085974 | 7238845 | 1470653 | nebulin | Neb | 311029 | 1,26 | up   |
| 6094652 | 7238845 | 1470681 | nebulin | Neb | 311029 | 1,01 | down |
| 6119845 | 7238845 | 1470705 | nebulin | Neb | 311029 | 1,45 | down |
| 6119939 | 7238845 | 1470596 | nebulin | Neb | 311029 | 1,12 | down |
| 6123670 | 7238845 | 1470657 | nebulin | Neb | 311029 | 1,25 | up   |
| 6125530 | 7238845 | 1470700 | nebulin | Neb | 311029 | 1,11 | up   |
| 6128809 | 7238845 | 1470600 | nebulin | Neb | 311029 | 1,27 | up   |
| 6131465 | 7238845 | 1470579 | nebulin | Neb | 311029 | 1,23 | down |
| 6136665 | 7238845 | 1470637 | nebulin | Neb | 311029 | 1,04 | up   |
| 6137916 | 7238845 | 1470739 | nebulin | Neb | 311029 | 1,54 | down |
| 6139517 | 7238845 | 1470623 | nebulin | Neb | 311029 | 1,42 | down |
| 6147364 | 7238845 | 1470633 | nebulin | Neb | 311029 | 1,00 | up   |
| 6148878 | 7238845 | 1470611 | nebulin | Neb | 311029 | 1,00 | up   |
| 6166786 | 7238845 | 1470564 | nebulin | Neb | 311029 | 1,05 | down |
| 6167540 | 7238845 | 1470652 | nebulin | Neb | 311029 | 1,18 | up   |
| 6175202 | 7238845 | 1470560 | nebulin | Neb | 311029 | 1,17 | down |
| 6181867 | 7238845 | 1470566 | nebulin | Neb | 311029 | 1,01 | down |
| 6192350 | 7238845 | 1470718 | nebulin | Neb | 311029 | 1,45 | up   |
| 6193119 | 7238845 | 1470654 | nebulin | Neb | 311029 | 1,16 | up   |
| 6193332 | 7238845 | 1470568 | nebulin | Neb | 311029 | 1,21 | up   |
| 6198676 | 7238845 | 1470720 | nebulin | Neb | 311029 | 1,54 | up   |
| 6207935 | 7238845 | 1470684 | nebulin | Neb | 311029 | 1,28 | down |
| 6221323 | 7238845 | 1470709 | nebulin | Neb | 311029 | 1,23 | down |
| 6226155 | 7238845 | 1470645 | nebulin | Neb | 311029 | 1,04 | down |
| 6233799 | 7238845 | 1470724 | nebulin | Neb | 311029 | 1,05 | down |
| 6236779 | 7238845 | 1470731 | nebulin | Neb | 311029 | 1,00 | up   |
| 6241045 | 7238845 | 1470624 | nebulin | Neb | 311029 | 1,35 | down |
| 6247175 | 7238845 | 1470589 | nebulin | Neb | 311029 | 1,20 | down |
| 6248822 | 7238845 | 1470706 | nebulin | Neb | 311029 | 1,14 | down |
| 6260248 | 7238845 | 1470613 | nebulin | Neb | 311029 | 1,57 | down |

|         |         |         |         |     |        |      |      |
|---------|---------|---------|---------|-----|--------|------|------|
| 6279498 | 7238845 | 1470647 | nebulin | Neb | 311029 | 1,02 | down |
| 6283340 | 7238845 | 1470648 | nebulin | Neb | 311029 | 1,19 | up   |
| 6285152 | 7238845 | 1470629 | nebulin | Neb | 311029 | 1,21 | down |
| 6286751 | 7238845 | 1470564 | nebulin | Neb | 311029 | 1,46 | up   |
| 6300652 | 7238845 | 1470710 | nebulin | Neb | 311029 | 1,11 | down |
| 6306446 | 7238845 | 1470728 | nebulin | Neb | 311029 | 1,01 | up   |
| 6312072 | 7238845 | 1470618 | nebulin | Neb | 311029 | 1,03 | up   |
| 6322278 | 7238845 | 1470634 | nebulin | Neb | 311029 | 1,07 | down |
| 6337450 | 7238845 | 1470722 | nebulin | Neb | 311029 | 1,25 | down |
| 6354379 | 7238845 | 1470646 | nebulin | Neb | 311029 | 1,04 | up   |
| 6375612 | 7238845 | 1470562 | nebulin | Neb | 311029 | 1,23 | down |
| 6378378 | 7238845 | 1470605 | nebulin | Neb | 311029 | 1,22 | down |
| 6379578 | 7238845 | 1470590 | nebulin | Neb | 311029 | 1,26 | down |
| 6396328 | 7238845 | 1470608 | nebulin | Neb | 311029 | 1,15 | up   |
| 6396734 | 7238845 | 1470632 | nebulin | Neb | 311029 | 1,18 | down |
| 6401674 | 7238845 | 1470582 | nebulin | Neb | 311029 | 1,51 | down |
| 6401823 | 7238845 | 1470619 | nebulin | Neb | 311029 | 1,22 | down |
| 6409068 | 7238845 | 1470677 | nebulin | Neb | 311029 | 1,07 | up   |
| 6413436 | 7238845 | 1470594 | nebulin | Neb | 311029 | 1,47 | down |
| 6415605 | 7238845 | 1470682 | nebulin | Neb | 311029 | 1,13 | down |
| 6421103 | 7238845 | 1470723 | nebulin | Neb | 311029 | 1,41 | down |
| 6423081 | 7238845 | 1470580 | nebulin | Neb | 311029 | 1,22 | down |
| 6425126 | 7238845 | 1470622 | nebulin | Neb | 311029 | 1,20 | up   |
| 6437730 | 7238845 | 1470697 | nebulin | Neb | 311029 | 1,17 | down |
| 6440169 | 7238845 | 1470725 | nebulin | Neb | 311029 | 1,18 | up   |
| 6464880 | 7238845 | 1470730 | nebulin | Neb | 311029 | 1,03 | up   |
| 6466561 | 7238845 | 1470683 | nebulin | Neb | 311029 | 1,21 | up   |
| 6473118 | 7238845 | 1470678 | nebulin | Neb | 311029 | 1,02 | up   |
| 6480532 | 7238845 | 1470607 | nebulin | Neb | 311029 | 1,08 | up   |
| 6485369 | 7238845 | 1470602 | nebulin | Neb | 311029 | 1,02 | up   |
| 6490908 | 7238845 | 1470559 | nebulin | Neb | 311029 | 1,04 | up   |
| 6507705 | 7238845 | 1470712 | nebulin | Neb | 311029 | 1,01 | down |
| 6512219 | 7238845 | 1470626 | nebulin | Neb | 311029 | 1,06 | up   |
| 6524101 | 7238845 | 1470690 | nebulin | Neb | 311029 | 1,21 | down |
| 6527697 | 7238845 | 1470687 | nebulin | Neb | 311029 | 1,22 | down |
| 6538712 | 7238845 | 1470726 | nebulin | Neb | 311029 | 1,03 | down |
| 6553036 | 7238845 | 1470565 | nebulin | Neb | 311029 | 1,03 | up   |
| 6556237 | 7238845 | 1470679 | nebulin | Neb | 311029 | 1,05 | up   |
| 6556876 | 7238845 | 1470639 | nebulin | Neb | 311029 | 1,38 | up   |
| 6567341 | 7238845 | 1470689 | nebulin | Neb | 311029 | 1,30 | up   |
| 6579193 | 7238845 | 1470719 | nebulin | Neb | 311029 | 1,08 | down |
| 6579803 | 7238845 | 1470699 | nebulin | Neb | 311029 | 1,56 | down |
| 6586458 | 7238845 | 1470694 | nebulin | Neb | 311029 | 1,08 | down |
| 6589085 | 7238845 | 1470693 | nebulin | Neb | 311029 | 1,04 | down |
| 6593318 | 7238845 | 1470686 | nebulin | Neb | 311029 | 1,20 | up   |
| 6598431 | 7238845 | 1470599 | nebulin | Neb | 311029 | 1,05 | down |
| 6618078 | 7238845 | 1470638 | nebulin | Neb | 311029 | 1,02 | up   |
| 6618123 | 7238845 | 1470661 | nebulin | Neb | 311029 | 1,00 | up   |
| 6621391 | 7238845 | 1470667 | nebulin | Neb | 311029 | 1,01 | down |
| 6623392 | 7238845 | 1470587 | nebulin | Neb | 311029 | 1,53 | up   |
| 6625676 | 7238845 | 1470584 | nebulin | Neb | 311029 | 1,00 | down |
| 6627284 | 7238845 | 1470732 | nebulin | Neb | 311029 | 1,60 | down |
| 6644519 | 7238845 | 1470570 | nebulin | Neb | 311029 | 1,08 | up   |
| 6655621 | 7238845 | 1470597 | nebulin | Neb | 311029 | 1,00 | up   |
| 6666005 | 7238845 | 1470609 | nebulin | Neb | 311029 | 1,03 | up   |
| 6672370 | 7238845 | 1470698 | nebulin | Neb | 311029 | 1,16 | up   |

|         |         |         |                                                 |       |        |      |      |
|---------|---------|---------|-------------------------------------------------|-------|--------|------|------|
| 6675005 | 7238845 | 1470736 | nebulin                                         | Neb   | 311029 | 1,03 | down |
| 6680090 | 7238845 | 1470695 | nebulin                                         | Neb   | 311029 | 1,01 | up   |
| 6684869 | 7238845 | 1470621 | nebulin                                         | Neb   | 311029 | 1,76 | down |
| 6685723 | 7238845 | 1470737 | nebulin                                         | Neb   | 311029 | 1,06 | up   |
| 6695615 | 7238845 | 1470649 | nebulin                                         | Neb   | 311029 | 1,04 | down |
| 6706052 | 7238845 | 1470615 | nebulin                                         | Neb   | 311029 | 1,53 | down |
| 6710451 | 7238845 | 1470561 | nebulin                                         | Neb   | 311029 | 1,01 | up   |
| 6711163 | 7238845 | 1470735 | nebulin                                         | Neb   | 311029 | 1,17 | up   |
| 6719148 | 7238845 | 1470696 | nebulin                                         | Neb   | 311029 | 1,01 | up   |
| 6725344 | 7238845 | 1470656 | nebulin                                         | Neb   | 311029 | 1,09 | up   |
| 6725470 | 7238845 | 1470665 | nebulin                                         | Neb   | 311029 | 2,16 | down |
| 5718109 | 7052331 | 1014598 | necdin-like 2                                   | Ndn12 | 309259 | 1,18 | up   |
| 5892182 | 7052331 | 1014598 | necdin-like 2                                   | Ndn12 | 309259 | 1,05 | up   |
| 6215238 | 7052331 | 1014598 | necdin-like 2                                   | Ndn12 | 309259 | 1,43 | up   |
| 5951235 | 7077170 | 1073572 | Nedd4 binding protein 3                         | N4bp3 | 303112 | 1,02 | down |
| 6326354 | 7077170 | 1073570 | Nedd4 binding protein 3                         | N4bp3 | 303112 | 2,21 | up   |
| 6372493 | 7077170 | 1073569 | Nedd4 binding protein 3                         | N4bp3 | 303112 | 1,05 | up   |
| 6516271 | 7077170 | 1073569 | Nedd4 binding protein 3                         | N4bp3 | 303112 | 1,14 | down |
| 6692700 | 7077170 | 1073571 | Nedd4 binding protein 3                         | N4bp3 | 303112 | 1,16 | up   |
| 5902992 | 7260461 | 1523862 | negative regulator of ubiquitin-like proteins 1 | Nub1  | 296731 | 1,04 | down |
| 5963667 | 7260461 | 1523861 | negative regulator of ubiquitin-like proteins 1 | Nub1  | 296731 | 1,10 | down |
| 6000277 | 7260461 | 1523858 | negative regulator of ubiquitin-like proteins 1 | Nub1  | 296731 | 1,05 | up   |
| 6100930 | 7260461 | 1523863 | negative regulator of ubiquitin-like proteins 1 | Nub1  | 296731 | 1,18 | up   |
| 6127826 | 7260461 | 1523867 | negative regulator of ubiquitin-like proteins 1 | Nub1  | 296731 | 1,02 | up   |
| 6216897 | 7260461 | 1523859 | negative regulator of ubiquitin-like proteins 1 | Nub1  | 296731 | 1,09 | down |
| 6242317 | 7260461 | 1523865 | negative regulator of ubiquitin-like proteins 1 | Nub1  | 296731 | 1,16 | down |
| 6296517 | 7260461 | 1523858 | negative regulator of ubiquitin-like proteins 1 | Nub1  | 296731 | 1,27 | down |
| 6375503 | 7260461 | 1523855 | negative regulator of ubiquitin-like proteins 1 | Nub1  | 296731 | 1,15 | down |
| 6376523 | 7260461 | 1523868 | negative regulator of ubiquitin-like proteins 1 | Nub1  | 296731 | 1,12 | up   |
| 6409741 | 7260461 | 1523860 | negative regulator of ubiquitin-like proteins 1 | Nub1  | 296731 | 1,13 | up   |
| 6463706 | 7260461 | 1523864 | negative regulator of ubiquitin-like proteins 1 | Nub1  | 296731 | 1,10 | down |
| 6532248 | 7260461 | 1523866 | negative regulator of ubiquitin-like proteins 1 | Nub1  | 296731 | 2,25 | down |
| 6533036 | 7260461 | 1523856 | negative regulator of ubiquitin-like proteins 1 | Nub1  | 296731 | 1,16 | up   |
| 6605105 | 7260461 | 1523869 | negative regulator of ubiquitin-like proteins 1 | Nub1  | 296731 | 1,16 | up   |
| 6665781 | 7260461 | 1523870 | negative regulator of ubiquitin-like proteins 1 | Nub1  | 296731 | 2,28 | down |
| 6672396 | 7260461 | 1523857 | negative regulator of ubiquitin-like proteins 1 | Nub1  | 296731 | 1,03 | up   |
| 5658703 | 7072332 | 1061651 | neighbor of Brca1 gene 1                        | Nbr1  | 303554 | 1,23 | up   |
| 5704138 | 7072332 | 1061666 | neighbor of Brca1 gene 1                        | Nbr1  | 303554 | 1,27 | down |
| 5860710 | 7072332 | 1061659 | neighbor of Brca1 gene 1                        | Nbr1  | 303554 | 1,05 | up   |
| 5869425 | 7072332 | 1061658 | neighbor of Brca1 gene 1                        | Nbr1  | 303554 | 1,04 | up   |
| 5881839 | 7072332 | 1061664 | neighbor of Brca1 gene 1                        | Nbr1  | 303554 | 1,07 | up   |
| 6011618 | 7072332 | 1061654 | neighbor of Brca1 gene 1                        | Nbr1  | 303554 | 1,02 | down |
| 6063062 | 7072332 | 1061645 | neighbor of Brca1 gene 1                        | Nbr1  | 303554 | 1,07 | up   |
| 6100253 | 7072332 | 1061652 | neighbor of Brca1 gene 1                        | Nbr1  | 303554 | 1,29 | down |
| 6140193 | 7072332 | 1061646 | neighbor of Brca1 gene 1                        | Nbr1  | 303554 | 1,33 | up   |
| 6153821 | 7072332 | 1061656 | neighbor of Brca1 gene 1                        | Nbr1  | 303554 | 1,17 | up   |
| 6221846 | 7072332 | 1061650 | neighbor of Brca1 gene 1                        | Nbr1  | 303554 | 1,28 | up   |
| 6233929 | 7072332 | 1061661 | neighbor of Brca1 gene 1                        | Nbr1  | 303554 | 1,18 | down |
| 6238890 | 7072332 | 1061655 | neighbor of Brca1 gene 1                        | Nbr1  | 303554 | 1,02 | up   |
| 6292785 | 7072332 | 1061663 | neighbor of Brca1 gene 1                        | Nbr1  | 303554 | 1,11 | down |
| 6319615 | 7072332 | 1061641 | neighbor of Brca1 gene 1                        | Nbr1  | 303554 | 1,60 | down |
| 6329014 | 7072332 | 1061649 | neighbor of Brca1 gene 1                        | Nbr1  | 303554 | 1,04 | up   |
| 6342695 | 7072332 | 1061641 | neighbor of Brca1 gene 1                        | Nbr1  | 303554 | 1,23 | down |
| 6353723 | 7072332 | 1061648 | neighbor of Brca1 gene 1                        | Nbr1  | 303554 | 2,03 | down |
| 6428847 | 7072332 | 1061653 | neighbor of Brca1 gene 1                        | Nbr1  | 303554 | 1,11 | down |
| 6470596 | 7072332 | 1061646 | neighbor of Brca1 gene 1                        | Nbr1  | 303554 | 1,00 | up   |



|         |         |         |                                               |       |        |      |      |
|---------|---------|---------|-----------------------------------------------|-------|--------|------|------|
| 6477279 | 7072332 | 1061665 | neighbor of Brca1 gene 1                      | Nbr1  | 303554 | 1,07 | down |
| 6487156 | 7072332 | 1061649 | neighbor of Brca1 gene 1                      | Nbr1  | 303554 | 1,08 | up   |
| 6511093 | 7072332 | 1061660 | neighbor of Brca1 gene 1                      | Nbr1  | 303554 | 1,19 | down |
| 6645428 | 7072332 | 1061662 | neighbor of Brca1 gene 1                      | Nbr1  | 303554 | 1,02 | up   |
| 6719967 | 7072332 | 1061657 | neighbor of Brca1 gene 1                      | Nbr1  | 303554 | 1,09 | down |
| 6734928 | 7072332 | 1061642 | neighbor of Brca1 gene 1                      | Nbr1  | 303554 | 1,81 | up   |
| 5700063 | 7317031 | 1664903 | nephroblastoma overexpressed gene             | Nov   | 81526  | 1,22 | up   |
| 5763352 | 7317031 | 1664908 | nephroblastoma overexpressed gene             | Nov   | 81526  | 1,10 | down |
| 5994994 | 7317031 | 1664904 | nephroblastoma overexpressed gene             | Nov   | 81526  | 1,43 | up   |
| 6136835 | 7317031 | 1664907 | nephroblastoma overexpressed gene             | Nov   | 81526  | 1,03 | down |
| 6198124 | 7317031 | 1664902 | nephroblastoma overexpressed gene             | Nov   | 81526  | 1,09 | down |
| 6485092 | 7317031 | 1664906 | nephroblastoma overexpressed gene             | Nov   | 81526  | 1,16 | up   |
| 6498089 | 7317031 | 1664905 | nephroblastoma overexpressed gene             | Nov   | 81526  | 2,50 | down |
| 5676480 | 7244602 | 1484769 | nephronophthisis 1 (juvenile) homolog (human) | Nphp1 | 296136 | 1,02 | up   |
| 5685694 | 7244602 | 1484766 | nephronophthisis 1 (juvenile) homolog (human) | Nphp1 | 296136 | 1,01 | up   |
| 5698374 | 7244602 | 1484775 | nephronophthisis 1 (juvenile) homolog (human) | Nphp1 | 296136 | 1,33 | down |
| 5724035 | 7244602 | 1484782 | nephronophthisis 1 (juvenile) homolog (human) | Nphp1 | 296136 | 1,19 | down |
| 5784837 | 7244602 | 1484758 | nephronophthisis 1 (juvenile) homolog (human) | Nphp1 | 296136 | 1,13 | down |
| 5822794 | 7244602 | 1484787 | nephronophthisis 1 (juvenile) homolog (human) | Nphp1 | 296136 | 1,04 | up   |
| 5906558 | 7244602 | 1484759 | nephronophthisis 1 (juvenile) homolog (human) | Nphp1 | 296136 | 1,15 | up   |
| 5916041 | 7244602 | 1484773 | nephronophthisis 1 (juvenile) homolog (human) | Nphp1 | 296136 | 1,68 | up   |
| 5917955 | 7244602 | 1484773 | nephronophthisis 1 (juvenile) homolog (human) | Nphp1 | 296136 | 1,31 | up   |
| 5943412 | 7244602 | 1484765 | nephronophthisis 1 (juvenile) homolog (human) | Nphp1 | 296136 | 1,31 | down |
| 5963560 | 7244602 | 1484763 | nephronophthisis 1 (juvenile) homolog (human) | Nphp1 | 296136 | 1,16 | down |
| 6027014 | 7244602 | 1484776 | nephronophthisis 1 (juvenile) homolog (human) | Nphp1 | 296136 | 1,40 | down |
| 6053042 | 7244602 | 1484767 | nephronophthisis 1 (juvenile) homolog (human) | Nphp1 | 296136 | 1,00 | up   |
| 6086117 | 7244602 | 1484783 | nephronophthisis 1 (juvenile) homolog (human) | Nphp1 | 296136 | 1,72 | up   |
| 6189865 | 7244602 | 1484769 | nephronophthisis 1 (juvenile) homolog (human) | Nphp1 | 296136 | 1,75 | up   |
| 6196270 | 7244602 | 1484784 | nephronophthisis 1 (juvenile) homolog (human) | Nphp1 | 296136 | 1,24 | down |
| 6243784 | 7244602 | 1484772 | nephronophthisis 1 (juvenile) homolog (human) | Nphp1 | 296136 | 1,72 | up   |
| 6297900 | 7244602 | 1484777 | nephronophthisis 1 (juvenile) homolog (human) | Nphp1 | 296136 | 1,29 | up   |
| 6370618 | 7244602 | 1484781 | nephronophthisis 1 (juvenile) homolog (human) | Nphp1 | 296136 | 1,07 | down |
| 6380836 | 7244602 | 1484778 | nephronophthisis 1 (juvenile) homolog (human) | Nphp1 | 296136 | 1,18 | down |
| 6418796 | 7244602 | 1484779 | nephronophthisis 1 (juvenile) homolog (human) | Nphp1 | 296136 | 2,18 | down |
| 6484173 | 7244602 | 1484786 | nephronophthisis 1 (juvenile) homolog (human) | Nphp1 | 296136 | 1,10 | down |
| 6505337 | 7244602 | 1484758 | nephronophthisis 1 (juvenile) homolog (human) | Nphp1 | 296136 | 1,04 | down |
| 6548683 | 7244602 | 1484785 | nephronophthisis 1 (juvenile) homolog (human) | Nphp1 | 296136 | 1,08 | up   |
| 6572582 | 7244602 | 1484768 | nephronophthisis 1 (juvenile) homolog (human) | Nphp1 | 296136 | 1,01 | down |
| 6576375 | 7244602 | 1484758 | nephronophthisis 1 (juvenile) homolog (human) | Nphp1 | 296136 | 1,04 | down |
| 6664437 | 7244602 | 1484774 | nephronophthisis 1 (juvenile) homolog (human) | Nphp1 | 296136 | 1,19 | up   |
| 5624310 | 7281950 | 1577844 | nephronophthisis 4 (juvenile) homolog (human) | Nphp4 | 313749 | 1,34 | up   |
| 5649630 | 7281950 | 1577848 | nephronophthisis 4 (juvenile) homolog (human) | Nphp4 | 313749 | 1,03 | down |
| 5654516 | 7281950 | 1577787 | nephronophthisis 4 (juvenile) homolog (human) | Nphp4 | 313749 | 1,15 | up   |
| 5663926 | 7281950 | 1577821 | nephronophthisis 4 (juvenile) homolog (human) | Nphp4 | 313749 | 1,03 | down |
| 5668418 | 7281950 | 1577823 | nephronophthisis 4 (juvenile) homolog (human) | Nphp4 | 313749 | 1,58 | down |
| 5672656 | 7281950 | 1577852 | nephronophthisis 4 (juvenile) homolog (human) | Nphp4 | 313749 | 1,02 | up   |
| 5679578 | 7281950 | 1577841 | nephronophthisis 4 (juvenile) homolog (human) | Nphp4 | 313749 | 1,29 | up   |
| 5685033 | 7281950 | 1577798 | nephronophthisis 4 (juvenile) homolog (human) | Nphp4 | 313749 | 1,04 | up   |
| 5734418 | 7281950 | 1577852 | nephronophthisis 4 (juvenile) homolog (human) | Nphp4 | 313749 | 1,23 | up   |
| 5766525 | 7281950 | 1577849 | nephronophthisis 4 (juvenile) homolog (human) | Nphp4 | 313749 | 1,49 | down |
| 5789862 | 7281950 | 1577838 | nephronophthisis 4 (juvenile) homolog (human) | Nphp4 | 313749 | 1,07 | up   |
| 5827221 | 7281950 | 1577839 | nephronophthisis 4 (juvenile) homolog (human) | Nphp4 | 313749 | 1,07 | up   |
| 5832646 | 7281950 | 1577801 | nephronophthisis 4 (juvenile) homolog (human) | Nphp4 | 313749 | 1,04 | up   |
| 5868087 | 7281950 | 1577810 | nephronophthisis 4 (juvenile) homolog (human) | Nphp4 | 313749 | 1,23 | up   |
| 5871839 | 7281950 | 1577787 | nephronophthisis 4 (juvenile) homolog (human) | Nphp4 | 313749 | 1,19 | up   |
| 5883990 | 7281950 | 1577796 | nephronophthisis 4 (juvenile) homolog (human) | Nphp4 | 313749 | 1,13 | up   |

|         |         |         |                                               |       |        |      |      |
|---------|---------|---------|-----------------------------------------------|-------|--------|------|------|
| 5899772 | 7281950 | 1577839 | nephronophthisis 4 (juvenile) homolog (human) | Nphp4 | 313749 | 1,09 | up   |
| 5949604 | 7281950 | 1577826 | nephronophthisis 4 (juvenile) homolog (human) | Nphp4 | 313749 | 1,22 | down |
| 5983800 | 7281950 | 1577846 | nephronophthisis 4 (juvenile) homolog (human) | Nphp4 | 313749 | 1,74 | down |
| 6170907 | 7281950 | 1577833 | nephronophthisis 4 (juvenile) homolog (human) | Nphp4 | 313749 | 1,05 | down |
| 6206297 | 7281950 | 1577847 | nephronophthisis 4 (juvenile) homolog (human) | Nphp4 | 313749 | 1,42 | up   |
| 6212236 | 7281950 | 1577825 | nephronophthisis 4 (juvenile) homolog (human) | Nphp4 | 313749 | 1,15 | down |
| 6212834 | 7281950 | 1577813 | nephronophthisis 4 (juvenile) homolog (human) | Nphp4 | 313749 | 1,57 | down |
| 6215020 | 7281950 | 1577831 | nephronophthisis 4 (juvenile) homolog (human) | Nphp4 | 313749 | 1,81 | down |
| 6277737 | 7281950 | 1577830 | nephronophthisis 4 (juvenile) homolog (human) | Nphp4 | 313749 | 1,32 | up   |
| 6283711 | 7281950 | 1577783 | nephronophthisis 4 (juvenile) homolog (human) | Nphp4 | 313749 | 1,09 | down |
| 6296628 | 7281950 | 1577846 | nephronophthisis 4 (juvenile) homolog (human) | Nphp4 | 313749 | 1,81 | up   |
| 6297215 | 7281950 | 1577801 | nephronophthisis 4 (juvenile) homolog (human) | Nphp4 | 313749 | 1,05 | down |
| 6355025 | 7281950 | 1577799 | nephronophthisis 4 (juvenile) homolog (human) | Nphp4 | 313749 | 1,01 | up   |
| 6431883 | 7281950 | 1577802 | nephronophthisis 4 (juvenile) homolog (human) | Nphp4 | 313749 | 1,21 | up   |
| 6500554 | 7281950 | 1577803 | nephronophthisis 4 (juvenile) homolog (human) | Nphp4 | 313749 | 1,56 | up   |
| 6563239 | 7281950 | 1577837 | nephronophthisis 4 (juvenile) homolog (human) | Nphp4 | 313749 | 1,17 | up   |
| 6581231 | 7281950 | 1577835 | nephronophthisis 4 (juvenile) homolog (human) | Nphp4 | 313749 | 1,16 | down |
| 6595580 | 7281950 | 1577837 | nephronophthisis 4 (juvenile) homolog (human) | Nphp4 | 313749 | 1,30 | up   |
| 6662094 | 7281950 | 1577810 | nephronophthisis 4 (juvenile) homolog (human) | Nphp4 | 313749 | 1,12 | up   |
| 6672696 | 7281950 | 1577824 | nephronophthisis 4 (juvenile) homolog (human) | Nphp4 | 313749 | 1,39 | down |
| 6687254 | 7281950 | 1577850 | nephronophthisis 4 (juvenile) homolog (human) | Nphp4 | 313749 | 1,36 | down |
| 6701110 | 7281950 | 1577789 | nephronophthisis 4 (juvenile) homolog (human) | Nphp4 | 313749 | 1,22 | down |
| 5724402 | 7078833 | 1077052 | netrin 1                                      | Ntn1  | 114523 | 1,18 | down |
| 6088944 | 7078833 | 1077051 | netrin 1                                      | Ntn1  | 114523 | 1,19 | down |
| 6162845 | 7078833 | 1077053 | netrin 1                                      | Ntn1  | 114523 | 1,21 | up   |
| 6204589 | 7078833 | 1077054 | netrin 1                                      | Ntn1  | 114523 | 1,13 | up   |
| 6273042 | 7078833 | 1077055 | netrin 1                                      | Ntn1  | 114523 | 1,20 | down |
| 6633380 | 7078833 | 1077050 | netrin 1                                      | Ntn1  | 114523 | 2,10 | up   |
| 5666098 | 7039308 | 983919  | neurexin 2                                    | Nrxn2 | 116595 | 1,03 | up   |
| 5683863 | 7039308 | 983906  | neurexin 2                                    | Nrxn2 | 116595 | 1,20 | down |
| 5753281 | 7039308 | 983911  | neurexin 2                                    | Nrxn2 | 116595 | 1,35 | up   |
| 5821209 | 7039308 | 983912  | neurexin 2                                    | Nrxn2 | 116595 | 1,14 | up   |
| 5833435 | 7039308 | 983907  | neurexin 2                                    | Nrxn2 | 116595 | 1,87 | down |
| 5842951 | 7039308 | 983925  | neurexin 2                                    | Nrxn2 | 116595 | 1,22 | down |
| 5887349 | 7039308 | 983913  | neurexin 2                                    | Nrxn2 | 116595 | 1,30 | up   |
| 5893049 | 7039308 | 983928  | neurexin 2                                    | Nrxn2 | 116595 | 1,33 | down |
| 5895829 | 7039308 | 983922  | neurexin 2                                    | Nrxn2 | 116595 | 1,01 | up   |
| 5909568 | 7039308 | 983916  | neurexin 2                                    | Nrxn2 | 116595 | 1,12 | down |
| 5915146 | 7039308 | 983924  | neurexin 2                                    | Nrxn2 | 116595 | 1,29 | down |
| 5929515 | 7039308 | 983927  | neurexin 2                                    | Nrxn2 | 116595 | 1,90 | up   |
| 5977815 | 7039308 | 983928  | neurexin 2                                    | Nrxn2 | 116595 | 1,10 | down |
| 6001471 | 7039308 | 983923  | neurexin 2                                    | Nrxn2 | 116595 | 1,01 | down |
| 6005125 | 7039308 | 983925  | neurexin 2                                    | Nrxn2 | 116595 | 1,10 | up   |
| 6098082 | 7039308 | 983926  | neurexin 2                                    | Nrxn2 | 116595 | 1,22 | down |
| 6114478 | 7039308 | 983928  | neurexin 2                                    | Nrxn2 | 116595 | 1,11 | down |
| 6190897 | 7039308 | 983915  | neurexin 2                                    | Nrxn2 | 116595 | 1,05 | up   |
| 6284522 | 7039308 | 983910  | neurexin 2                                    | Nrxn2 | 116595 | 1,17 | up   |
| 6347817 | 7039308 | 983918  | neurexin 2                                    | Nrxn2 | 116595 | 1,12 | up   |
| 6373502 | 7039308 | 983920  | neurexin 2                                    | Nrxn2 | 116595 | 1,83 | up   |
| 6389200 | 7039308 | 983928  | neurexin 2                                    | Nrxn2 | 116595 | 1,14 | up   |
| 6400400 | 7039308 | 983906  | neurexin 2                                    | Nrxn2 | 116595 | 2,06 | down |
| 6413816 | 7039308 | 983906  | neurexin 2                                    | Nrxn2 | 116595 | 1,16 | up   |
| 6518974 | 7039308 | 983909  | neurexin 2                                    | Nrxn2 | 116595 | 2,02 | down |
| 6643495 | 7039308 | 983929  | neurexin 2                                    | Nrxn2 | 116595 | 1,07 | up   |
| 6651694 | 7039308 | 983917  | neurexin 2                                    | Nrxn2 | 116595 | 1,07 | down |
| 6742992 | 7039308 | 983914  | neurexin 2                                    | Nrxn2 | 116595 | 1,01 | down |

|         |         |         |                                                |        |        |      |      |
|---------|---------|---------|------------------------------------------------|--------|--------|------|------|
| 5620525 | 7350237 | 1745502 | neurobeachin-like 2                            | Nbeal2 | 316014 | 1,15 | down |
| 5650855 | 7350237 | 1745501 | neurobeachin-like 2                            | Nbeal2 | 316014 | 1,18 | down |
| 5651495 | 7350237 | 1745513 | neurobeachin-like 2                            | Nbeal2 | 316014 | 1,01 | up   |
| 5713625 | 7350237 | 1745515 | neurobeachin-like 2                            | Nbeal2 | 316014 | 1,27 | down |
| 5735714 | 7350237 | 1745508 | neurobeachin-like 2                            | Nbeal2 | 316014 | 1,08 | down |
| 5759539 | 7350237 | 1745522 | neurobeachin-like 2                            | Nbeal2 | 316014 | 1,14 | down |
| 5759784 | 7350237 | 1745502 | neurobeachin-like 2                            | Nbeal2 | 316014 | 1,10 | up   |
| 5816434 | 7350237 | 1745501 | neurobeachin-like 2                            | Nbeal2 | 316014 | 1,10 | up   |
| 5871841 | 7350237 | 1745507 | neurobeachin-like 2                            | Nbeal2 | 316014 | 1,53 | down |
| 5872857 | 7350237 | 1745499 | neurobeachin-like 2                            | Nbeal2 | 316014 | 1,15 | down |
| 5884913 | 7350237 | 1745505 | neurobeachin-like 2                            | Nbeal2 | 316014 | 1,25 | up   |
| 5899439 | 7350237 | 1745508 | neurobeachin-like 2                            | Nbeal2 | 316014 | 2,87 | up   |
| 5995368 | 7350237 | 1745514 | neurobeachin-like 2                            | Nbeal2 | 316014 | 1,08 | down |
| 6026793 | 7350237 | 1745508 | neurobeachin-like 2                            | Nbeal2 | 316014 | 1,32 | up   |
| 6059649 | 7350237 | 1745510 | neurobeachin-like 2                            | Nbeal2 | 316014 | 1,10 | down |
| 6217778 | 7350237 | 1745511 | neurobeachin-like 2                            | Nbeal2 | 316014 | 1,00 | down |
| 6226204 | 7350237 | 1745506 | neurobeachin-like 2                            | Nbeal2 | 316014 | 1,54 | up   |
| 6249637 | 7350237 | 1745518 | neurobeachin-like 2                            | Nbeal2 | 316014 | 1,24 | down |
| 6318566 | 7350237 | 1745525 | neurobeachin-like 2                            | Nbeal2 | 316014 | 1,47 | up   |
| 6354583 | 7350237 | 1745517 | neurobeachin-like 2                            | Nbeal2 | 316014 | 1,40 | down |
| 6363350 | 7350237 | 1745470 | neurobeachin-like 2                            | Nbeal2 | 316014 | 1,01 | down |
| 6434643 | 7350237 | 1745503 | neurobeachin-like 2                            | Nbeal2 | 316014 | 1,06 | up   |
| 6500400 | 7350237 | 1745512 | neurobeachin-like 2                            | Nbeal2 | 316014 | 1,30 | up   |
| 6525995 | 7350237 | 1745521 | neurobeachin-like 2                            | Nbeal2 | 316014 | 1,37 | up   |
| 6555888 | 7350237 | 1745525 | neurobeachin-like 2                            | Nbeal2 | 316014 | 1,06 | up   |
| 6578679 | 7350237 | 1745504 | neurobeachin-like 2                            | Nbeal2 | 316014 | 1,09 | up   |
| 6599189 | 7350237 | 1745520 | neurobeachin-like 2                            | Nbeal2 | 316014 | 1,13 | down |
| 6613491 | 7350237 | 1745516 | neurobeachin-like 2                            | Nbeal2 | 316014 | 1,04 | up   |
| 6657139 | 7350237 | 1745500 | neurobeachin-like 2                            | Nbeal2 | 316014 | 1,18 | down |
| 6659659 | 7350237 | 1745525 | neurobeachin-like 2                            | Nbeal2 | 316014 | 1,53 | up   |
| 6663364 | 7350237 | 1745509 | neurobeachin-like 2                            | Nbeal2 | 316014 | 1,14 | up   |
| 6745495 | 7350237 | 1745519 | neurobeachin-like 2                            | Nbeal2 | 316014 | 1,03 | down |
| 6008682 | 7294075 | 1606324 | neuroblastoma, suppression of tumorigenicity 1 | Nbl1   | 50594  | 1,07 | up   |
| 6030804 | 7294075 | 1606326 | neuroblastoma, suppression of tumorigenicity 1 | Nbl1   | 50594  | 1,36 | down |
| 6179675 | 7294075 | 1606326 | neuroblastoma, suppression of tumorigenicity 1 | Nbl1   | 50594  | 1,06 | up   |
| 6190787 | 7294075 | 1606324 | neuroblastoma, suppression of tumorigenicity 1 | Nbl1   | 50594  | 1,30 | up   |
| 6243198 | 7294075 | 1606327 | neuroblastoma, suppression of tumorigenicity 1 | Nbl1   | 50594  | 1,13 | up   |
| 6260509 | 7294075 | 1606325 | neuroblastoma, suppression of tumorigenicity 1 | Nbl1   | 50594  | 1,64 | down |
| 6506735 | 7294075 | 1606328 | neuroblastoma, suppression of tumorigenicity 1 | Nbl1   | 50594  | 1,10 | up   |
| 6661374 | 7294075 | 1606324 | neuroblastoma, suppression of tumorigenicity 1 | Nbl1   | 50594  | 2,33 | up   |
| 5624594 | 7144354 | 1236685 | neurocan                                       | Ncan   | 58982  | 1,17 | up   |
| 5672186 | 7144354 | 1236686 | neurocan                                       | Ncan   | 58982  | 1,04 | up   |
| 5774494 | 7144354 | 1236686 | neurocan                                       | Ncan   | 58982  | 1,55 | up   |
| 5838133 | 7144354 | 1236691 | neurocan                                       | Ncan   | 58982  | 1,22 | down |
| 5861065 | 7144354 | 1236692 | neurocan                                       | Ncan   | 58982  | 1,37 | down |
| 5910599 | 7144354 | 1236687 | neurocan                                       | Ncan   | 58982  | 1,10 | up   |
| 6026246 | 7144354 | 1236685 | neurocan                                       | Ncan   | 58982  | 1,14 | down |
| 6030032 | 7144354 | 1236679 | neurocan                                       | Ncan   | 58982  | 1,19 | up   |
| 6048660 | 7144354 | 1236686 | neurocan                                       | Ncan   | 58982  | 2,60 | down |
| 6073007 | 7144354 | 1236681 | neurocan                                       | Ncan   | 58982  | 1,32 | down |
| 6081148 | 7144354 | 1236689 | neurocan                                       | Ncan   | 58982  | 2,54 | up   |
| 6093055 | 7144354 | 1236685 | neurocan                                       | Ncan   | 58982  | 1,15 | down |
| 6118315 | 7144354 | 1236692 | neurocan                                       | Ncan   | 58982  | 1,05 | down |
| 6188723 | 7144354 | 1236686 | neurocan                                       | Ncan   | 58982  | 1,18 | down |
| 6221391 | 7144354 | 1236686 | neurocan                                       | Ncan   | 58982  | 1,15 | down |
| 6234283 | 7144354 | 1236688 | neurocan                                       | Ncan   | 58982  | 1,39 | up   |

|         |         |         |                                             |      |        |      |      |
|---------|---------|---------|---------------------------------------------|------|--------|------|------|
| 6281674 | 7144354 | 1236686 | neurocan                                    | Ncan | 58982  | 1,62 | down |
| 6285916 | 7144354 | 1236694 | neurocan                                    | Ncan | 58982  | 1,20 | down |
| 6299637 | 7144354 | 1236686 | neurocan                                    | Ncan | 58982  | 1,01 | down |
| 6303760 | 7144354 | 1236680 | neurocan                                    | Ncan | 58982  | 1,27 | up   |
| 6304069 | 7144354 | 1236684 | neurocan                                    | Ncan | 58982  | 1,11 | up   |
| 6305152 | 7144354 | 1236682 | neurocan                                    | Ncan | 58982  | 1,40 | down |
| 6361272 | 7144354 | 1236693 | neurocan                                    | Ncan | 58982  | 1,13 | up   |
| 6513028 | 7144354 | 1236683 | neurocan                                    | Ncan | 58982  | 1,03 | up   |
| 6632955 | 7144354 | 1236683 | neurocan                                    | Ncan | 58982  | 2,07 | up   |
| 6641118 | 7144354 | 1236686 | neurocan                                    | Ncan | 58982  | 1,89 | down |
| 6691893 | 7144354 | 1236694 | neurocan                                    | Ncan | 58982  | 1,14 | down |
| 6736001 | 7144354 | 1236693 | neurocan                                    | Ncan | 58982  | 1,45 | down |
| 6742167 | 7144354 | 1236690 | neurocan                                    | Ncan | 58982  | 1,16 | down |
| 5800738 | 7127790 | 1195839 | neurofilament, heavy polypeptide            | Nefh | 24587  | 1,21 | up   |
| 5891930 | 7127790 | 1195836 | neurofilament, heavy polypeptide            | Nefh | 24587  | 1,04 | down |
| 6044690 | 7127790 | 1195836 | neurofilament, heavy polypeptide            | Nefh | 24587  | 1,73 | up   |
| 6153629 | 7127790 | 1195835 | neurofilament, heavy polypeptide            | Nefh | 24587  | 1,41 | up   |
| 6169805 | 7127790 | 1195835 | neurofilament, heavy polypeptide            | Nefh | 24587  | 1,22 | down |
| 6194392 | 7127790 | 1195840 | neurofilament, heavy polypeptide            | Nefh | 24587  | 3,48 | up   |
| 6297390 | 7127790 | 1195838 | neurofilament, heavy polypeptide            | Nefh | 24587  | 1,02 | down |
| 6648925 | 7127790 | 1195837 | neurofilament, heavy polypeptide            | Nefh | 24587  | 1,14 | up   |
| 6740507 | 7127790 | 1195835 | neurofilament, heavy polypeptide            | Nefh | 24587  | 1,15 | down |
| 5754267 | 7344200 | 1730664 | neurogranin                                 | Nrgn | 64356  | 1,68 | down |
| 5797660 | 7344200 | 1730663 | neurogranin                                 | Nrgn | 64356  | 1,18 | up   |
| 5884186 | 7344200 | 1730665 | neurogranin                                 | Nrgn | 64356  | 2,45 | down |
| 5940077 | 7344200 | 1730664 | neurogranin                                 | Nrgn | 64356  | 1,19 | up   |
| 6093968 | 7344200 | 1730663 | neurogranin                                 | Nrgn | 64356  | 1,13 | up   |
| 6678265 | 7344200 | 1730665 | neurogranin                                 | Nrgn | 64356  | 1,12 | down |
| 5730586 | 7117849 | 1171790 | neuromedin U                                | Nmu  | 63887  | 1,26 | down |
| 5744369 | 7117849 | 1171789 | neuromedin U                                | Nmu  | 63887  | 1,36 | down |
| 5876078 | 7117849 | 1171786 | neuromedin U                                | Nmu  | 63887  | 1,03 | down |
| 5916291 | 7117849 | 1171788 | neuromedin U                                | Nmu  | 63887  | 1,11 | down |
| 5930121 | 7117849 | 1171785 | neuromedin U                                | Nmu  | 63887  | 1,03 | up   |
| 5959558 | 7117849 | 1171782 | neuromedin U                                | Nmu  | 63887  | 1,30 | up   |
| 5981888 | 7117849 | 1171784 | neuromedin U                                | Nmu  | 63887  | 1,04 | down |
| 6250046 | 7117849 | 1171787 | neuromedin U                                | Nmu  | 63887  | 1,35 | down |
| 6365443 | 7117849 | 1171783 | neuromedin U                                | Nmu  | 63887  | 1,54 | down |
| 6374395 | 7117849 | 1171782 | neuromedin U                                | Nmu  | 63887  | 2,20 | up   |
| 6447476 | 7117849 | 1171791 | neuromedin U                                | Nmu  | 63887  | 1,12 | up   |
| 6575003 | 7117849 | 1171782 | neuromedin U                                | Nmu  | 63887  | 1,09 | down |
| 5756287 | 7031774 | 964724  | neuron navigator 2                          | Nav2 | 171563 | 1,77 | up   |
| 5915771 | 7031774 | 964724  | neuron navigator 2                          | Nav2 | 171563 | 1,21 | up   |
| 6228146 | 7031774 | 964724  | neuron navigator 2                          | Nav2 | 171563 | 1,92 | up   |
| 5673974 | 7364948 | 1781221 | neuronal guanine nucleotide exchange factor | Ngef | 246217 | 1,30 | down |
| 5744954 | 7364948 | 1781220 | neuronal guanine nucleotide exchange factor | Ngef | 246217 | 1,27 | up   |
| 5781426 | 7364948 | 1781223 | neuronal guanine nucleotide exchange factor | Ngef | 246217 | 1,39 | up   |
| 5845481 | 7364948 | 1781206 | neuronal guanine nucleotide exchange factor | Ngef | 246217 | 1,25 | up   |
| 5859724 | 7364948 | 1781218 | neuronal guanine nucleotide exchange factor | Ngef | 246217 | 1,75 | down |
| 5873523 | 7364948 | 1781221 | neuronal guanine nucleotide exchange factor | Ngef | 246217 | 1,12 | up   |
| 5984633 | 7364948 | 1781211 | neuronal guanine nucleotide exchange factor | Ngef | 246217 | 1,11 | up   |
| 6101674 | 7364948 | 1781213 | neuronal guanine nucleotide exchange factor | Ngef | 246217 | 1,19 | down |
| 6199974 | 7364948 | 1781210 | neuronal guanine nucleotide exchange factor | Ngef | 246217 | 1,09 | down |
| 6240738 | 7364948 | 1781205 | neuronal guanine nucleotide exchange factor | Ngef | 246217 | 1,26 | down |
| 6242944 | 7364948 | 1781212 | neuronal guanine nucleotide exchange factor | Ngef | 246217 | 1,08 | up   |
| 6262831 | 7364948 | 1781208 | neuronal guanine nucleotide exchange factor | Ngef | 246217 | 1,06 | up   |
| 6292634 | 7364948 | 1781221 | neuronal guanine nucleotide exchange factor | Ngef | 246217 | 1,35 | up   |

|         |         |         |                                             |       |        |      |      |
|---------|---------|---------|---------------------------------------------|-------|--------|------|------|
| 6305953 | 7364948 | 1781225 | neuronal guanine nucleotide exchange factor | Ngef  | 246217 | 2,87 | down |
| 6433308 | 7364948 | 1781205 | neuronal guanine nucleotide exchange factor | Ngef  | 246217 | 1,91 | down |
| 6467571 | 7364948 | 1781205 | neuronal guanine nucleotide exchange factor | Ngef  | 246217 | 1,02 | up   |
| 6566085 | 7364948 | 1781216 | neuronal guanine nucleotide exchange factor | Ngef  | 246217 | 1,13 | down |
| 6609621 | 7364948 | 1781205 | neuronal guanine nucleotide exchange factor | Ngef  | 246217 | 1,05 | up   |
| 6610007 | 7364948 | 1781209 | neuronal guanine nucleotide exchange factor | Ngef  | 246217 | 1,06 | up   |
| 5704226 | 7048382 | 1006352 | neuronal PAS domain protein 1               | Npas1 | 308387 | 1,76 | down |
| 5755843 | 7048382 | 1006353 | neuronal PAS domain protein 1               | Npas1 | 308387 | 1,17 | up   |
| 5780352 | 7048382 | 1006356 | neuronal PAS domain protein 1               | Npas1 | 308387 | 1,16 | down |
| 5813155 | 7048382 | 1006347 | neuronal PAS domain protein 1               | Npas1 | 308387 | 1,10 | down |
| 5813545 | 7048382 | 1006356 | neuronal PAS domain protein 1               | Npas1 | 308387 | 1,19 | down |
| 6013354 | 7048382 | 1006351 | neuronal PAS domain protein 1               | Npas1 | 308387 | 1,40 | up   |
| 6134442 | 7048382 | 1006344 | neuronal PAS domain protein 1               | Npas1 | 308387 | 1,22 | up   |
| 6264967 | 7048382 | 1006349 | neuronal PAS domain protein 1               | Npas1 | 308387 | 1,10 | down |
| 6278489 | 7048382 | 1006357 | neuronal PAS domain protein 1               | Npas1 | 308387 | 1,11 | down |
| 6420621 | 7048382 | 1006350 | neuronal PAS domain protein 1               | Npas1 | 308387 | 1,04 | down |
| 6436548 | 7048382 | 1006345 | neuronal PAS domain protein 1               | Npas1 | 308387 | 1,23 | down |
| 6444960 | 7048382 | 1006345 | neuronal PAS domain protein 1               | Npas1 | 308387 | 1,71 | down |
| 6574432 | 7048382 | 1006348 | neuronal PAS domain protein 1               | Npas1 | 308387 | 1,29 | up   |
| 6648280 | 7048382 | 1006344 | neuronal PAS domain protein 1               | Npas1 | 308387 | 1,24 | down |
| 6726116 | 7048382 | 1006354 | neuronal PAS domain protein 1               | Npas1 | 308387 | 1,12 | up   |
| 5699447 | 7353712 | 1753949 | neuronal PAS domain protein 2               | Npas2 | 316351 | 1,24 | up   |
| 5711224 | 7353712 | 1753960 | neuronal PAS domain protein 2               | Npas2 | 316351 | 1,04 | down |
| 5738490 | 7353712 | 1753960 | neuronal PAS domain protein 2               | Npas2 | 316351 | 1,26 | up   |
| 5765337 | 7353712 | 1753954 | neuronal PAS domain protein 2               | Npas2 | 316351 | 1,57 | down |
| 5884022 | 7353712 | 1753965 | neuronal PAS domain protein 2               | Npas2 | 316351 | 1,51 | up   |
| 5935769 | 7353712 | 1753966 | neuronal PAS domain protein 2               | Npas2 | 316351 | 1,21 | up   |
| 5991203 | 7353712 | 1753965 | neuronal PAS domain protein 2               | Npas2 | 316351 | 1,30 | down |
| 6026916 | 7353712 | 1753957 | neuronal PAS domain protein 2               | Npas2 | 316351 | 1,15 | down |
| 6122355 | 7353712 | 1753933 | neuronal PAS domain protein 2               | Npas2 | 316351 | 1,18 | down |
| 6166245 | 7353712 | 1753963 | neuronal PAS domain protein 2               | Npas2 | 316351 | 1,30 | down |
| 6261359 | 7353712 | 1753943 | neuronal PAS domain protein 2               | Npas2 | 316351 | 1,39 | down |
| 6269018 | 7353712 | 1753940 | neuronal PAS domain protein 2               | Npas2 | 316351 | 1,20 | down |
| 6284085 | 7353712 | 1753963 | neuronal PAS domain protein 2               | Npas2 | 316351 | 1,27 | up   |
| 6285539 | 7353712 | 1753935 | neuronal PAS domain protein 2               | Npas2 | 316351 | 1,45 | up   |
| 6303408 | 7353712 | 1753953 | neuronal PAS domain protein 2               | Npas2 | 316351 | 1,19 | down |
| 6338293 | 7353712 | 1753948 | neuronal PAS domain protein 2               | Npas2 | 316351 | 1,21 | down |
| 6391632 | 7353712 | 1753915 | neuronal PAS domain protein 2               | Npas2 | 316351 | 1,18 | down |
| 6482633 | 7353712 | 1753927 | neuronal PAS domain protein 2               | Npas2 | 316351 | 1,02 | up   |
| 6531904 | 7353712 | 1753951 | neuronal PAS domain protein 2               | Npas2 | 316351 | 1,02 | up   |
| 6551512 | 7353712 | 1753966 | neuronal PAS domain protein 2               | Npas2 | 316351 | 2,03 | down |
| 6572425 | 7353712 | 1753946 | neuronal PAS domain protein 2               | Npas2 | 316351 | 1,93 | down |
| 6585369 | 7353712 | 1753939 | neuronal PAS domain protein 2               | Npas2 | 316351 | 1,11 | down |
| 6611791 | 7353712 | 1753951 | neuronal PAS domain protein 2               | Npas2 | 316351 | 1,27 | up   |
| 6652083 | 7353712 | 1753937 | neuronal PAS domain protein 2               | Npas2 | 316351 | 1,12 | up   |
| 6670789 | 7353712 | 1753952 | neuronal PAS domain protein 2               | Npas2 | 316351 | 1,69 | up   |
| 6699884 | 7353712 | 1753943 | neuronal PAS domain protein 2               | Npas2 | 316351 | 1,02 | down |
| 6727750 | 7353712 | 1753947 | neuronal PAS domain protein 2               | Npas2 | 316351 | 1,27 | up   |
| 6741839 | 7353712 | 1753961 | neuronal PAS domain protein 2               | Npas2 | 316351 | 1,05 | down |
| 5642889 | 7182255 | 1331271 | neuropilin 1                                | Nrp1  | 246331 | 1,18 | down |
| 5695831 | 7182255 | 1331281 | neuropilin 1                                | Nrp1  | 246331 | 1,12 | down |
| 5703112 | 7182255 | 1331275 | neuropilin 1                                | Nrp1  | 246331 | 1,34 | down |
| 5785290 | 7182255 | 1331288 | neuropilin 1                                | Nrp1  | 246331 | 1,18 | down |
| 5787201 | 7182255 | 1331272 | neuropilin 1                                | Nrp1  | 246331 | 1,16 | down |
| 5809136 | 7182255 | 1331280 | neuropilin 1                                | Nrp1  | 246331 | 1,32 | up   |
| 5826522 | 7182255 | 1331274 | neuropilin 1                                | Nrp1  | 246331 | 1,83 | up   |

|         |         |         |                                                |       |        |      |      |
|---------|---------|---------|------------------------------------------------|-------|--------|------|------|
| 5885957 | 7182255 | 1331280 | neuropilin 1                                   | Nrp1  | 246331 | 1,42 | up   |
| 5942697 | 7182255 | 1331272 | neuropilin 1                                   | Nrp1  | 246331 | 1,36 | down |
| 5945717 | 7182255 | 1331285 | neuropilin 1                                   | Nrp1  | 246331 | 1,56 | down |
| 5961865 | 7182255 | 1331272 | neuropilin 1                                   | Nrp1  | 246331 | 1,25 | up   |
| 6004935 | 7182255 | 1331285 | neuropilin 1                                   | Nrp1  | 246331 | 1,08 | up   |
| 6027269 | 7182255 | 1331273 | neuropilin 1                                   | Nrp1  | 246331 | 1,81 | up   |
| 6077621 | 7182255 | 1331287 | neuropilin 1                                   | Nrp1  | 246331 | 1,29 | up   |
| 6114657 | 7182255 | 1331283 | neuropilin 1                                   | Nrp1  | 246331 | 1,12 | down |
| 6134348 | 7182255 | 1331272 | neuropilin 1                                   | Nrp1  | 246331 | 1,19 | down |
| 6248968 | 7182255 | 1331272 | neuropilin 1                                   | Nrp1  | 246331 | 1,27 | up   |
| 6253449 | 7182255 | 1331280 | neuropilin 1                                   | Nrp1  | 246331 | 1,10 | up   |
| 6260469 | 7182255 | 1331286 | neuropilin 1                                   | Nrp1  | 246331 | 1,31 | down |
| 6490223 | 7182255 | 1331278 | neuropilin 1                                   | Nrp1  | 246331 | 1,85 | up   |
| 6523691 | 7182255 | 1331285 | neuropilin 1                                   | Nrp1  | 246331 | 1,55 | down |
| 6590605 | 7182255 | 1331279 | neuropilin 1                                   | Nrp1  | 246331 | 2,27 | up   |
| 6606379 | 7182255 | 1331282 | neuropilin 1                                   | Nrp1  | 246331 | 1,39 | down |
| 6621167 | 7182255 | 1331276 | neuropilin 1                                   | Nrp1  | 246331 | 1,04 | down |
| 6671527 | 7182255 | 1331284 | neuropilin 1                                   | Nrp1  | 246331 | 1,10 | up   |
| 6689106 | 7182255 | 1331277 | neuropilin 1                                   | Nrp1  | 246331 | 1,07 | down |
| 6734080 | 7182255 | 1331285 | neuropilin 1                                   | Nrp1  | 246331 | 1,22 | up   |
| 5704521 | 7343532 | 1728936 | neurotrimin                                    | Hnt   | 50864  | 1,89 | up   |
| 5768217 | 7343532 | 1728933 | neurotrimin                                    | Hnt   | 50864  | 1,45 | down |
| 5839759 | 7343532 | 1728937 | neurotrimin                                    | Hnt   | 50864  | 1,73 | up   |
| 6117753 | 7343532 | 1728930 | neurotrimin                                    | Hnt   | 50864  | 2,17 | down |
| 6149758 | 7343532 | 1728931 | neurotrimin                                    | Hnt   | 50864  | 1,42 | down |
| 6624627 | 7343532 | 1728935 | neurotrimin                                    | Hnt   | 50864  | 3,62 | up   |
| 6645692 | 7343532 | 1728934 | neurotrimin                                    | Hnt   | 50864  | 1,00 | up   |
| 6732385 | 7343532 | 1728932 | neurotrimin                                    | Hnt   | 50864  | 1,60 | down |
| 5621324 | 7161672 | 1279521 | neurotrophic tyrosine kinase, receptor, type 2 | Ntrk2 | 25054  | 1,29 | up   |
| 5645197 | 7161672 | 1279515 | neurotrophic tyrosine kinase, receptor, type 2 | Ntrk2 | 25054  | 1,17 | down |
| 5678017 | 7161672 | 1279510 | neurotrophic tyrosine kinase, receptor, type 2 | Ntrk2 | 25054  | 1,20 | down |
| 5711686 | 7161672 | 1279502 | neurotrophic tyrosine kinase, receptor, type 2 | Ntrk2 | 25054  | 1,75 | up   |
| 5829200 | 7161672 | 1279504 | neurotrophic tyrosine kinase, receptor, type 2 | Ntrk2 | 25054  | 1,64 | up   |
| 5846086 | 7161672 | 1279511 | neurotrophic tyrosine kinase, receptor, type 2 | Ntrk2 | 25054  | 1,64 | down |
| 5850348 | 7161672 | 1279513 | neurotrophic tyrosine kinase, receptor, type 2 | Ntrk2 | 25054  | 1,51 | down |
| 5863436 | 7161672 | 1279516 | neurotrophic tyrosine kinase, receptor, type 2 | Ntrk2 | 25054  | 1,05 | down |
| 5863461 | 7161672 | 1279505 | neurotrophic tyrosine kinase, receptor, type 2 | Ntrk2 | 25054  | 2,55 | up   |
| 5869251 | 7161672 | 1279520 | neurotrophic tyrosine kinase, receptor, type 2 | Ntrk2 | 25054  | 1,10 | down |
| 6090229 | 7161672 | 1279519 | neurotrophic tyrosine kinase, receptor, type 2 | Ntrk2 | 25054  | 1,53 | down |
| 6116897 | 7161672 | 1279512 | neurotrophic tyrosine kinase, receptor, type 2 | Ntrk2 | 25054  | 1,52 | up   |
| 6144805 | 7161672 | 1279510 | neurotrophic tyrosine kinase, receptor, type 2 | Ntrk2 | 25054  | 1,19 | down |
| 6211984 | 7161672 | 1279518 | neurotrophic tyrosine kinase, receptor, type 2 | Ntrk2 | 25054  | 1,19 | down |
| 6212815 | 7161672 | 1279509 | neurotrophic tyrosine kinase, receptor, type 2 | Ntrk2 | 25054  | 1,39 | up   |
| 6243425 | 7161672 | 1279509 | neurotrophic tyrosine kinase, receptor, type 2 | Ntrk2 | 25054  | 1,40 | up   |
| 6260069 | 7161672 | 1279506 | neurotrophic tyrosine kinase, receptor, type 2 | Ntrk2 | 25054  | 2,35 | up   |
| 6267171 | 7161672 | 1279501 | neurotrophic tyrosine kinase, receptor, type 2 | Ntrk2 | 25054  | 1,10 | up   |
| 6287989 | 7161672 | 1279508 | neurotrophic tyrosine kinase, receptor, type 2 | Ntrk2 | 25054  | 1,32 | down |
| 6338793 | 7161672 | 1279510 | neurotrophic tyrosine kinase, receptor, type 2 | Ntrk2 | 25054  | 1,80 | up   |
| 6344940 | 7161672 | 1279503 | neurotrophic tyrosine kinase, receptor, type 2 | Ntrk2 | 25054  | 1,00 | up   |
| 6355013 | 7161672 | 1279517 | neurotrophic tyrosine kinase, receptor, type 2 | Ntrk2 | 25054  | 1,23 | down |
| 6434715 | 7161672 | 1279520 | neurotrophic tyrosine kinase, receptor, type 2 | Ntrk2 | 25054  | 1,13 | up   |
| 6444403 | 7161672 | 1279507 | neurotrophic tyrosine kinase, receptor, type 2 | Ntrk2 | 25054  | 1,54 | up   |
| 6464986 | 7161672 | 1279514 | neurotrophic tyrosine kinase, receptor, type 2 | Ntrk2 | 25054  | 1,13 | down |
| 6467051 | 7161672 | 1279509 | neurotrophic tyrosine kinase, receptor, type 2 | Ntrk2 | 25054  | 1,08 | up   |
| 6633271 | 7161672 | 1279509 | neurotrophic tyrosine kinase, receptor, type 2 | Ntrk2 | 25054  | 1,15 | down |
| 6721814 | 7161672 | 1279508 | neurotrophic tyrosine kinase, receptor, type 2 | Ntrk2 | 25054  | 1,82 | up   |

|         |         |         |                                           |        |        |      |      |
|---------|---------|---------|-------------------------------------------|--------|--------|------|------|
| 5621586 | 7330181 | 1695706 | NFAT activating protein with ITAM motif 1 | Nfam1  | 362966 | 1,03 | down |
| 6150081 | 7330181 | 1695705 | NFAT activating protein with ITAM motif 1 | Nfam1  | 362966 | 1,06 | up   |
| 6244553 | 7330181 | 1695697 | NFAT activating protein with ITAM motif 1 | Nfam1  | 362966 | 1,10 | up   |
| 6418123 | 7330181 | 1695703 | NFAT activating protein with ITAM motif 1 | Nfam1  | 362966 | 1,03 | up   |
| 6744163 | 7330181 | 1695706 | NFAT activating protein with ITAM motif 1 | Nfam1  | 362966 | 1,33 | up   |
| 5755206 | 7136496 | 1217306 | N-glycanase 1                             | Ngly1  | 361014 | 1,08 | up   |
| 5863466 | 7136496 | 1217301 | N-glycanase 1                             | Ngly1  | 361014 | 1,12 | up   |
| 5877913 | 7136496 | 1217296 | N-glycanase 1                             | Ngly1  | 361014 | 1,15 | down |
| 5881170 | 7136496 | 1217303 | N-glycanase 1                             | Ngly1  | 361014 | 1,32 | up   |
| 6025740 | 7136496 | 1217296 | N-glycanase 1                             | Ngly1  | 361014 | 1,04 | up   |
| 6039306 | 7136496 | 1217299 | N-glycanase 1                             | Ngly1  | 361014 | 1,14 | up   |
| 6163312 | 7136496 | 1217298 | N-glycanase 1                             | Ngly1  | 361014 | 1,00 | down |
| 6262392 | 7136496 | 1217300 | N-glycanase 1                             | Ngly1  | 361014 | 1,69 | down |
| 6322404 | 7136496 | 1217302 | N-glycanase 1                             | Ngly1  | 361014 | 1,09 | down |
| 6374373 | 7136496 | 1217305 | N-glycanase 1                             | Ngly1  | 361014 | 2,03 | down |
| 6466830 | 7136496 | 1217305 | N-glycanase 1                             | Ngly1  | 361014 | 1,36 | down |
| 6607759 | 7136496 | 1217298 | N-glycanase 1                             | Ngly1  | 361014 | 1,20 | down |
| 6619812 | 7136496 | 1217297 | N-glycanase 1                             | Ngly1  | 361014 | 1,11 | up   |
| 6633744 | 7136496 | 1217304 | N-glycanase 1                             | Ngly1  | 361014 | 1,21 | up   |
| 5617825 | 7043452 | 993836  | NHL repeat containing 2                   | Nhlrc2 | 307986 | 2,05 | down |
| 5697244 | 7043452 | 993826  | NHL repeat containing 2                   | Nhlrc2 | 307986 | 1,05 | up   |
| 5752125 | 7043452 | 993828  | NHL repeat containing 2                   | Nhlrc2 | 307986 | 1,23 | down |
| 5758954 | 7043452 | 993839  | NHL repeat containing 2                   | Nhlrc2 | 307986 | 1,31 | up   |
| 5830245 | 7043452 | 993830  | NHL repeat containing 2                   | Nhlrc2 | 307986 | 1,22 | down |
| 5864100 | 7043452 | 993833  | NHL repeat containing 2                   | Nhlrc2 | 307986 | 2,28 | down |
| 5903012 | 7043452 | 993842  | NHL repeat containing 2                   | Nhlrc2 | 307986 | 1,22 | down |
| 5956751 | 7043452 | 993835  | NHL repeat containing 2                   | Nhlrc2 | 307986 | 1,38 | up   |
| 6030620 | 7043452 | 993838  | NHL repeat containing 2                   | Nhlrc2 | 307986 | 1,05 | up   |
| 6084275 | 7043452 | 993837  | NHL repeat containing 2                   | Nhlrc2 | 307986 | 1,49 | up   |
| 6124361 | 7043452 | 993825  | NHL repeat containing 2                   | Nhlrc2 | 307986 | 1,71 | down |
| 6318352 | 7043452 | 993834  | NHL repeat containing 2                   | Nhlrc2 | 307986 | 1,01 | down |
| 6489758 | 7043452 | 993840  | NHL repeat containing 2                   | Nhlrc2 | 307986 | 1,03 | down |
| 6527974 | 7043452 | 993829  | NHL repeat containing 2                   | Nhlrc2 | 307986 | 1,20 | down |
| 6723125 | 7043452 | 993835  | NHL repeat containing 2                   | Nhlrc2 | 307986 | 1,23 | up   |
| 5665202 | 7273022 | 1555429 | nibrin                                    | Nbn    | 85482  | 1,15 | down |
| 5684394 | 7273022 | 1555429 | nibrin                                    | Nbn    | 85482  | 1,15 | down |
| 5755466 | 7273022 | 1555414 | nibrin                                    | Nbn    | 85482  | 1,11 | up   |
| 5762658 | 7273022 | 1555429 | nibrin                                    | Nbn    | 85482  | 1,11 | up   |
| 5827214 | 7273022 | 1555413 | nibrin                                    | Nbn    | 85482  | 1,15 | down |
| 5829857 | 7273022 | 1555426 | nibrin                                    | Nbn    | 85482  | 1,24 | up   |
| 5934876 | 7273022 | 1555423 | nibrin                                    | Nbn    | 85482  | 1,21 | down |
| 6088238 | 7273022 | 1555419 | nibrin                                    | Nbn    | 85482  | 1,15 | up   |
| 6154399 | 7273022 | 1555424 | nibrin                                    | Nbn    | 85482  | 2,22 | up   |
| 6217964 | 7273022 | 1555418 | nibrin                                    | Nbn    | 85482  | 1,06 | up   |
| 6300153 | 7273022 | 1555425 | nibrin                                    | Nbn    | 85482  | 1,34 | down |
| 6340735 | 7273022 | 1555415 | nibrin                                    | Nbn    | 85482  | 1,07 | down |
| 6479668 | 7273022 | 1555428 | nibrin                                    | Nbn    | 85482  | 1,38 | down |
| 6547220 | 7273022 | 1555421 | nibrin                                    | Nbn    | 85482  | 1,35 | up   |
| 6554762 | 7273022 | 1555427 | nibrin                                    | Nbn    | 85482  | 1,00 | down |
| 6612081 | 7273022 | 1555422 | nibrin                                    | Nbn    | 85482  | 1,03 | up   |
| 6615817 | 7273022 | 1555416 | nibrin                                    | Nbn    | 85482  | 1,07 | up   |
| 6681304 | 7273022 | 1555422 | nibrin                                    | Nbn    | 85482  | 1,65 | down |
| 6694383 | 7273022 | 1555417 | nibrin                                    | Nbn    | 85482  | 1,14 | up   |
| 6735257 | 7273022 | 1555420 | nibrin                                    | Nbn    | 85482  | 1,18 | down |
| 5627250 | 7114149 | 1162535 | nicastrin                                 | Ncstn  | 289231 | 1,14 | down |
| 5765182 | 7114149 | 1162526 | nicastrin                                 | Ncstn  | 289231 | 1,13 | down |

|         |         |         |                                                           |       |        |      |      |
|---------|---------|---------|-----------------------------------------------------------|-------|--------|------|------|
| 5969722 | 7114149 | 1162529 | nicastrin                                                 | Ncstn | 289231 | 1,19 | down |
| 5992365 | 7114149 | 1162536 | nicastrin                                                 | Ncstn | 289231 | 1,04 | up   |
| 5992458 | 7114149 | 1162522 | nicastrin                                                 | Ncstn | 289231 | 1,08 | up   |
| 5999460 | 7114149 | 1162536 | nicastrin                                                 | Ncstn | 289231 | 1,18 | up   |
| 6025543 | 7114149 | 1162532 | nicastrin                                                 | Ncstn | 289231 | 1,02 | up   |
| 6056433 | 7114149 | 1162528 | nicastrin                                                 | Ncstn | 289231 | 1,02 | up   |
| 6075100 | 7114149 | 1162537 | nicastrin                                                 | Ncstn | 289231 | 2,55 | up   |
| 6078723 | 7114149 | 1162538 | nicastrin                                                 | Ncstn | 289231 | 1,29 | up   |
| 6101367 | 7114149 | 1162525 | nicastrin                                                 | Ncstn | 289231 | 1,02 | up   |
| 6113387 | 7114149 | 1162539 | nicastrin                                                 | Ncstn | 289231 | 1,02 | up   |
| 6138012 | 7114149 | 1162531 | nicastrin                                                 | Ncstn | 289231 | 1,02 | up   |
| 6193214 | 7114149 | 1162533 | nicastrin                                                 | Ncstn | 289231 | 1,13 | up   |
| 6219691 | 7114149 | 1162524 | nicastrin                                                 | Ncstn | 289231 | 1,08 | up   |
| 6267750 | 7114149 | 1162521 | nicastrin                                                 | Ncstn | 289231 | 1,44 | up   |
| 6376266 | 7114149 | 1162523 | nicastrin                                                 | Ncstn | 289231 | 1,04 | down |
| 6391342 | 7114149 | 1162521 | nicastrin                                                 | Ncstn | 289231 | 1,07 | down |
| 6441554 | 7114149 | 1162539 | nicastrin                                                 | Ncstn | 289231 | 1,31 | down |
| 6458065 | 7114149 | 1162534 | nicastrin                                                 | Ncstn | 289231 | 1,13 | up   |
| 6511010 | 7114149 | 1162527 | nicastrin                                                 | Ncstn | 289231 | 1,35 | down |
| 6658752 | 7114149 | 1162530 | nicastrin                                                 | Ncstn | 289231 | 1,05 | up   |
| 6683551 | 7114149 | 1162524 | nicastrin                                                 | Ncstn | 289231 | 1,11 | down |
| 5629095 | 7349643 | 1744172 | NIMA (never in mitosis gene a)- related kinase 11         | Nek11 | 315978 | 1,16 | down |
| 5713276 | 7349643 | 1744183 | NIMA (never in mitosis gene a)- related kinase 11         | Nek11 | 315978 | 1,30 | up   |
| 5728952 | 7349643 | 1744179 | NIMA (never in mitosis gene a)- related kinase 11         | Nek11 | 315978 | 1,62 | down |
| 5925157 | 7349643 | 1744155 | NIMA (never in mitosis gene a)- related kinase 11         | Nek11 | 315978 | 1,29 | up   |
| 6024355 | 7349643 | 1744194 | NIMA (never in mitosis gene a)- related kinase 11         | Nek11 | 315978 | 1,42 | down |
| 6111666 | 7349643 | 1744167 | NIMA (never in mitosis gene a)- related kinase 11         | Nek11 | 315978 | 2,14 | down |
| 6131103 | 7349643 | 1744169 | NIMA (never in mitosis gene a)- related kinase 11         | Nek11 | 315978 | 1,40 | up   |
| 6163319 | 7349643 | 1744171 | NIMA (never in mitosis gene a)- related kinase 11         | Nek11 | 315978 | 1,04 | up   |
| 6166137 | 7349643 | 1744183 | NIMA (never in mitosis gene a)- related kinase 11         | Nek11 | 315978 | 1,52 | down |
| 6300847 | 7349643 | 1744155 | NIMA (never in mitosis gene a)- related kinase 11         | Nek11 | 315978 | 1,72 | down |
| 6313330 | 7349643 | 1744173 | NIMA (never in mitosis gene a)- related kinase 11         | Nek11 | 315978 | 1,45 | down |
| 6338480 | 7349643 | 1744193 | NIMA (never in mitosis gene a)- related kinase 11         | Nek11 | 315978 | 1,01 | up   |
| 6471335 | 7349643 | 1744175 | NIMA (never in mitosis gene a)- related kinase 11         | Nek11 | 315978 | 1,01 | down |
| 6533593 | 7349643 | 1744191 | NIMA (never in mitosis gene a)- related kinase 11         | Nek11 | 315978 | 1,02 | down |
| 6631845 | 7349643 | 1744164 | NIMA (never in mitosis gene a)- related kinase 11         | Nek11 | 315978 | 1,48 | down |
| 6640378 | 7349643 | 1744155 | NIMA (never in mitosis gene a)- related kinase 11         | Nek11 | 315978 | 1,05 | up   |
| 6645941 | 7349643 | 1744168 | NIMA (never in mitosis gene a)- related kinase 11         | Nek11 | 315978 | 1,31 | up   |
| 5632805 | 7150631 | 1252180 | NIMA (never in mitosis gene a)-related expressed kinase 1 | Nek1  | 290705 | 1,08 | up   |
| 5646370 | 7150631 | 1252163 | NIMA (never in mitosis gene a)-related expressed kinase 1 | Nek1  | 290705 | 1,49 | down |
| 5650096 | 7150631 | 1252183 | NIMA (never in mitosis gene a)-related expressed kinase 1 | Nek1  | 290705 | 1,22 | down |
| 5683802 | 7150631 | 1252156 | NIMA (never in mitosis gene a)-related expressed kinase 1 | Nek1  | 290705 | 2,15 | down |
| 5719312 | 7150631 | 1252167 | NIMA (never in mitosis gene a)-related expressed kinase 1 | Nek1  | 290705 | 1,08 | up   |
| 5741344 | 7150631 | 1252148 | NIMA (never in mitosis gene a)-related expressed kinase 1 | Nek1  | 290705 | 1,13 | up   |
| 5743232 | 7150631 | 1252179 | NIMA (never in mitosis gene a)-related expressed kinase 1 | Nek1  | 290705 | 1,35 | down |
| 5814545 | 7150631 | 1252159 | NIMA (never in mitosis gene a)-related expressed kinase 1 | Nek1  | 290705 | 3,27 | down |
| 5820287 | 7150631 | 1252170 | NIMA (never in mitosis gene a)-related expressed kinase 1 | Nek1  | 290705 | 1,33 | down |
| 5820579 | 7150631 | 1252181 | NIMA (never in mitosis gene a)-related expressed kinase 1 | Nek1  | 290705 | 1,09 | down |
| 5853509 | 7150631 | 1252166 | NIMA (never in mitosis gene a)-related expressed kinase 1 | Nek1  | 290705 | 1,43 | up   |
| 5873469 | 7150631 | 1252156 | NIMA (never in mitosis gene a)-related expressed kinase 1 | Nek1  | 290705 | 1,67 | down |
| 5883347 | 7150631 | 1252176 | NIMA (never in mitosis gene a)-related expressed kinase 1 | Nek1  | 290705 | 1,24 | up   |
| 5883422 | 7150631 | 1252161 | NIMA (never in mitosis gene a)-related expressed kinase 1 | Nek1  | 290705 | 1,57 | down |
| 5900200 | 7150631 | 1252186 | NIMA (never in mitosis gene a)-related expressed kinase 1 | Nek1  | 290705 | 1,17 | down |
| 5950582 | 7150631 | 1252184 | NIMA (never in mitosis gene a)-related expressed kinase 1 | Nek1  | 290705 | 1,64 | down |
| 5968000 | 7150631 | 1252188 | NIMA (never in mitosis gene a)-related expressed kinase 1 | Nek1  | 290705 | 1,36 | down |
| 6009310 | 7150631 | 1252160 | NIMA (never in mitosis gene a)-related expressed kinase 1 | Nek1  | 290705 | 1,21 | down |



|         |         |         |                                                           |      |        |      |      |
|---------|---------|---------|-----------------------------------------------------------|------|--------|------|------|
| 6028349 | 7150631 | 1252187 | NIMA (never in mitosis gene a)-related expressed kinase 1 | Nek1 | 290705 | 1,18 | down |
| 6046750 | 7150631 | 1252190 | NIMA (never in mitosis gene a)-related expressed kinase 1 | Nek1 | 290705 | 1,43 | down |
| 6108602 | 7150631 | 1252191 | NIMA (never in mitosis gene a)-related expressed kinase 1 | Nek1 | 290705 | 1,11 | down |
| 6126322 | 7150631 | 1252182 | NIMA (never in mitosis gene a)-related expressed kinase 1 | Nek1 | 290705 | 1,28 | down |
| 6135248 | 7150631 | 1252183 | NIMA (never in mitosis gene a)-related expressed kinase 1 | Nek1 | 290705 | 1,06 | down |
| 6161735 | 7150631 | 1252162 | NIMA (never in mitosis gene a)-related expressed kinase 1 | Nek1 | 290705 | 1,05 | down |
| 6172703 | 7150631 | 1252153 | NIMA (never in mitosis gene a)-related expressed kinase 1 | Nek1 | 290705 | 1,48 | up   |
| 6187850 | 7150631 | 1252169 | NIMA (never in mitosis gene a)-related expressed kinase 1 | Nek1 | 290705 | 1,05 | up   |
| 6190070 | 7150631 | 1252186 | NIMA (never in mitosis gene a)-related expressed kinase 1 | Nek1 | 290705 | 1,71 | up   |
| 6220295 | 7150631 | 1252194 | NIMA (never in mitosis gene a)-related expressed kinase 1 | Nek1 | 290705 | 1,11 | down |
| 6253555 | 7150631 | 1252149 | NIMA (never in mitosis gene a)-related expressed kinase 1 | Nek1 | 290705 | 1,24 | up   |
| 6255885 | 7150631 | 1252192 | NIMA (never in mitosis gene a)-related expressed kinase 1 | Nek1 | 290705 | 1,56 | down |
| 6279797 | 7150631 | 1252152 | NIMA (never in mitosis gene a)-related expressed kinase 1 | Nek1 | 290705 | 1,18 | up   |
| 6316022 | 7150631 | 1252159 | NIMA (never in mitosis gene a)-related expressed kinase 1 | Nek1 | 290705 | 1,06 | down |
| 6411884 | 7150631 | 1252147 | NIMA (never in mitosis gene a)-related expressed kinase 1 | Nek1 | 290705 | 1,01 | down |
| 6435765 | 7150631 | 1252154 | NIMA (never in mitosis gene a)-related expressed kinase 1 | Nek1 | 290705 | 1,15 | up   |
| 6491072 | 7150631 | 1252193 | NIMA (never in mitosis gene a)-related expressed kinase 1 | Nek1 | 290705 | 1,08 | up   |
| 6510497 | 7150631 | 1252189 | NIMA (never in mitosis gene a)-related expressed kinase 1 | Nek1 | 290705 | 1,01 | down |
| 6600668 | 7150631 | 1252173 | NIMA (never in mitosis gene a)-related expressed kinase 1 | Nek1 | 290705 | 1,01 | up   |
| 5656788 | 7307485 | 1641349 | ninein (GSK3B interacting protein)                        | Nin  | 299117 | 1,19 | down |
| 5687357 | 7307485 | 1641342 | ninein (GSK3B interacting protein)                        | Nin  | 299117 | 1,06 | down |
| 5687684 | 7307485 | 1641389 | ninein (GSK3B interacting protein)                        | Nin  | 299117 | 1,54 | down |
| 5694489 | 7307485 | 1641332 | ninein (GSK3B interacting protein)                        | Nin  | 299117 | 1,06 | up   |
| 5711587 | 7307485 | 1641362 | ninein (GSK3B interacting protein)                        | Nin  | 299117 | 1,50 | down |
| 5746449 | 7307485 | 1641357 | ninein (GSK3B interacting protein)                        | Nin  | 299117 | 1,03 | up   |
| 5755033 | 7307485 | 1641360 | ninein (GSK3B interacting protein)                        | Nin  | 299117 | 1,11 | down |
| 5885860 | 7307485 | 1641341 | ninein (GSK3B interacting protein)                        | Nin  | 299117 | 1,70 | up   |
| 5917781 | 7307485 | 1641341 | ninein (GSK3B interacting protein)                        | Nin  | 299117 | 1,26 | down |
| 5994734 | 7307485 | 1641344 | ninein (GSK3B interacting protein)                        | Nin  | 299117 | 1,07 | up   |
| 6006344 | 7307485 | 1641356 | ninein (GSK3B interacting protein)                        | Nin  | 299117 | 1,22 | down |
| 6024252 | 7307485 | 1641347 | ninein (GSK3B interacting protein)                        | Nin  | 299117 | 1,20 | down |
| 6044348 | 7307485 | 1641370 | ninein (GSK3B interacting protein)                        | Nin  | 299117 | 1,30 | up   |
| 6063920 | 7307485 | 1641347 | ninein (GSK3B interacting protein)                        | Nin  | 299117 | 1,08 | up   |
| 6100884 | 7307485 | 1641380 | ninein (GSK3B interacting protein)                        | Nin  | 299117 | 1,01 | up   |
| 6120340 | 7307485 | 1641343 | ninein (GSK3B interacting protein)                        | Nin  | 299117 | 1,18 | up   |
| 6146775 | 7307485 | 1641352 | ninein (GSK3B interacting protein)                        | Nin  | 299117 | 1,39 | up   |
| 6172643 | 7307485 | 1641351 | ninein (GSK3B interacting protein)                        | Nin  | 299117 | 1,01 | up   |
| 6178901 | 7307485 | 1641374 | ninein (GSK3B interacting protein)                        | Nin  | 299117 | 1,39 | up   |
| 6194434 | 7307485 | 1641338 | ninein (GSK3B interacting protein)                        | Nin  | 299117 | 1,30 | up   |
| 6284481 | 7307485 | 1641347 | ninein (GSK3B interacting protein)                        | Nin  | 299117 | 1,18 | up   |
| 6311897 | 7307485 | 1641354 | ninein (GSK3B interacting protein)                        | Nin  | 299117 | 1,10 | down |
| 6333541 | 7307485 | 1641333 | ninein (GSK3B interacting protein)                        | Nin  | 299117 | 1,22 | up   |
| 6339082 | 7307485 | 1641339 | ninein (GSK3B interacting protein)                        | Nin  | 299117 | 1,14 | up   |
| 6346440 | 7307485 | 1641347 | ninein (GSK3B interacting protein)                        | Nin  | 299117 | 1,44 | down |
| 6393494 | 7307485 | 1641340 | ninein (GSK3B interacting protein)                        | Nin  | 299117 | 1,21 | down |
| 6437210 | 7307485 | 1641355 | ninein (GSK3B interacting protein)                        | Nin  | 299117 | 1,02 | up   |
| 6438374 | 7307485 | 1641348 | ninein (GSK3B interacting protein)                        | Nin  | 299117 | 1,16 | up   |
| 6441889 | 7307485 | 1641353 | ninein (GSK3B interacting protein)                        | Nin  | 299117 | 1,09 | up   |
| 6464132 | 7307485 | 1641345 | ninein (GSK3B interacting protein)                        | Nin  | 299117 | 1,02 | down |
| 6483826 | 7307485 | 1641350 | ninein (GSK3B interacting protein)                        | Nin  | 299117 | 1,21 | down |
| 6488098 | 7307485 | 1641360 | ninein (GSK3B interacting protein)                        | Nin  | 299117 | 1,02 | up   |
| 6488341 | 7307485 | 1641347 | ninein (GSK3B interacting protein)                        | Nin  | 299117 | 1,67 | down |
| 6493963 | 7307485 | 1641342 | ninein (GSK3B interacting protein)                        | Nin  | 299117 | 1,13 | down |
| 6589915 | 7307485 | 1641337 | ninein (GSK3B interacting protein)                        | Nin  | 299117 | 1,02 | up   |
| 6624142 | 7307485 | 1641336 | ninein (GSK3B interacting protein)                        | Nin  | 299117 | 1,48 | down |
| 5648251 | 7246548 | 1489156 | ninein-like                                               | Nlp  | 311529 | 1,10 | down |

|         |         |         |                                                    |        |        |      |      |
|---------|---------|---------|----------------------------------------------------|--------|--------|------|------|
| 5655681 | 7246548 | 1489155 | ninein-like                                        | Nlp    | 311529 | 1,39 | up   |
| 5801489 | 7246548 | 1489150 | ninein-like                                        | Nlp    | 311529 | 1,01 | down |
| 5811562 | 7246548 | 1489159 | ninein-like                                        | Nlp    | 311529 | 1,10 | up   |
| 5818018 | 7246548 | 1489137 | ninein-like                                        | Nlp    | 311529 | 1,33 | down |
| 5881311 | 7246548 | 1489160 | ninein-like                                        | Nlp    | 311529 | 1,44 | down |
| 5923938 | 7246548 | 1489165 | ninein-like                                        | Nlp    | 311529 | 1,01 | up   |
| 5956708 | 7246548 | 1489139 | ninein-like                                        | Nlp    | 311529 | 1,02 | down |
| 5957275 | 7246548 | 1489166 | ninein-like                                        | Nlp    | 311529 | 1,84 | down |
| 6000205 | 7246548 | 1489164 | ninein-like                                        | Nlp    | 311529 | 1,15 | down |
| 6008010 | 7246548 | 1489169 | ninein-like                                        | Nlp    | 311529 | 1,05 | down |
| 6139314 | 7246548 | 1489136 | ninein-like                                        | Nlp    | 311529 | 1,43 | down |
| 6141294 | 7246548 | 1489149 | ninein-like                                        | Nlp    | 311529 | 1,03 | up   |
| 6169090 | 7246548 | 1489160 | ninein-like                                        | Nlp    | 311529 | 1,22 | up   |
| 6174020 | 7246548 | 1489136 | ninein-like                                        | Nlp    | 311529 | 1,01 | down |
| 6185473 | 7246548 | 1489147 | ninein-like                                        | Nlp    | 311529 | 1,12 | down |
| 6246759 | 7246548 | 1489143 | ninein-like                                        | Nlp    | 311529 | 2,16 | up   |
| 6257042 | 7246548 | 1489141 | ninein-like                                        | Nlp    | 311529 | 1,10 | up   |
| 6316341 | 7246548 | 1489138 | ninein-like                                        | Nlp    | 311529 | 1,01 | down |
| 6386995 | 7246548 | 1489154 | ninein-like                                        | Nlp    | 311529 | 1,28 | up   |
| 6425414 | 7246548 | 1489163 | ninein-like                                        | Nlp    | 311529 | 1,22 | down |
| 6426970 | 7246548 | 1489162 | ninein-like                                        | Nlp    | 311529 | 1,05 | down |
| 6512301 | 7246548 | 1489142 | ninein-like                                        | Nlp    | 311529 | 1,22 | up   |
| 6514724 | 7246548 | 1489152 | ninein-like                                        | Nlp    | 311529 | 1,41 | down |
| 6618471 | 7246548 | 1489145 | ninein-like                                        | Nlp    | 311529 | 1,02 | down |
| 6675716 | 7246548 | 1489140 | ninein-like                                        | Nlp    | 311529 | 1,02 | up   |
| 6702024 | 7246548 | 1489146 | ninein-like                                        | Nlp    | 311529 | 1,07 | up   |
| 6702962 | 7246548 | 1489137 | ninein-like                                        | Nlp    | 311529 | 1,23 | up   |
| 6718983 | 7246548 | 1489136 | ninein-like                                        | Nlp    | 311529 | 1,07 | up   |
| 6723728 | 7246548 | 1489151 | ninein-like                                        | Nlp    | 311529 | 1,05 | down |
| 5742937 | 7113859 | 1161975 | nitric oxide synthase 1 (neuronal) adaptor protein | Nos1ap | 192363 | 1,27 | down |
| 5756678 | 7113859 | 1161980 | nitric oxide synthase 1 (neuronal) adaptor protein | Nos1ap | 192363 | 1,68 | up   |
| 5858019 | 7113859 | 1161984 | nitric oxide synthase 1 (neuronal) adaptor protein | Nos1ap | 192363 | 1,26 | down |
| 5861909 | 7113859 | 1161983 | nitric oxide synthase 1 (neuronal) adaptor protein | Nos1ap | 192363 | 1,22 | up   |
| 5874144 | 7113859 | 1161978 | nitric oxide synthase 1 (neuronal) adaptor protein | Nos1ap | 192363 | 1,07 | down |
| 5912077 | 7113859 | 1161979 | nitric oxide synthase 1 (neuronal) adaptor protein | Nos1ap | 192363 | 1,00 | down |
| 5929596 | 7113859 | 1161975 | nitric oxide synthase 1 (neuronal) adaptor protein | Nos1ap | 192363 | 1,04 | down |
| 6011530 | 7113859 | 1161977 | nitric oxide synthase 1 (neuronal) adaptor protein | Nos1ap | 192363 | 1,00 | down |
| 6042803 | 7113859 | 1161976 | nitric oxide synthase 1 (neuronal) adaptor protein | Nos1ap | 192363 | 1,29 | down |
| 6127093 | 7113859 | 1161978 | nitric oxide synthase 1 (neuronal) adaptor protein | Nos1ap | 192363 | 1,03 | up   |
| 6208602 | 7113859 | 1161984 | nitric oxide synthase 1 (neuronal) adaptor protein | Nos1ap | 192363 | 1,13 | down |
| 6321624 | 7113859 | 1161974 | nitric oxide synthase 1 (neuronal) adaptor protein | Nos1ap | 192363 | 1,01 | up   |
| 6542455 | 7113859 | 1161981 | nitric oxide synthase 1 (neuronal) adaptor protein | Nos1ap | 192363 | 1,23 | up   |
| 6599339 | 7113859 | 1161975 | nitric oxide synthase 1 (neuronal) adaptor protein | Nos1ap | 192363 | 2,56 | down |
| 6720969 | 7113859 | 1161982 | nitric oxide synthase 1 (neuronal) adaptor protein | Nos1ap | 192363 | 1,39 | up   |
| 5664760 | 7069999 | 1056012 | nitric oxide synthase 2, inducible                 | Nos2   | 24599  | 1,83 | down |
| 5683180 | 7069999 | 1056004 | nitric oxide synthase 2, inducible                 | Nos2   | 24599  | 1,21 | down |
| 5693047 | 7069999 | 1056020 | nitric oxide synthase 2, inducible                 | Nos2   | 24599  | 1,69 | down |
| 5730360 | 7069999 | 1056002 | nitric oxide synthase 2, inducible                 | Nos2   | 24599  | 1,56 | down |
| 5758064 | 7069999 | 1056001 | nitric oxide synthase 2, inducible                 | Nos2   | 24599  | 1,41 | up   |
| 5810222 | 7069999 | 1056023 | nitric oxide synthase 2, inducible                 | Nos2   | 24599  | 2,71 | up   |
| 5818146 | 7069999 | 1056024 | nitric oxide synthase 2, inducible                 | Nos2   | 24599  | 6,97 | down |
| 5877268 | 7069999 | 1056002 | nitric oxide synthase 2, inducible                 | Nos2   | 24599  | 1,42 | down |
| 5883984 | 7069999 | 1056008 | nitric oxide synthase 2, inducible                 | Nos2   | 24599  | 2,60 | down |
| 5897082 | 7069999 | 1056014 | nitric oxide synthase 2, inducible                 | Nos2   | 24599  | 1,27 | down |
| 5917327 | 7069999 | 1056017 | nitric oxide synthase 2, inducible                 | Nos2   | 24599  | 1,15 | up   |
| 5924664 | 7069999 | 1056003 | nitric oxide synthase 2, inducible                 | Nos2   | 24599  | 1,13 | down |

|         |         |         |                                                        |        |        |      |      |
|---------|---------|---------|--------------------------------------------------------|--------|--------|------|------|
| 5952010 | 7069999 | 1056011 | nitric oxide synthase 2, inducible                     | Nos2   | 24599  | 2,93 | up   |
| 6019263 | 7069999 | 1056015 | nitric oxide synthase 2, inducible                     | Nos2   | 24599  | 1,15 | down |
| 6070066 | 7069999 | 1056019 | nitric oxide synthase 2, inducible                     | Nos2   | 24599  | 1,20 | up   |
| 6131270 | 7069999 | 1056007 | nitric oxide synthase 2, inducible                     | Nos2   | 24599  | 1,20 | up   |
| 6169334 | 7069999 | 1056028 | nitric oxide synthase 2, inducible                     | Nos2   | 24599  | 7,23 | down |
| 6179967 | 7069999 | 1056027 | nitric oxide synthase 2, inducible                     | Nos2   | 24599  | 1,39 | up   |
| 6207601 | 7069999 | 1056010 | nitric oxide synthase 2, inducible                     | Nos2   | 24599  | 1,00 | up   |
| 6215948 | 7069999 | 1056009 | nitric oxide synthase 2, inducible                     | Nos2   | 24599  | 2,09 | down |
| 6239444 | 7069999 | 1056013 | nitric oxide synthase 2, inducible                     | Nos2   | 24599  | 1,05 | down |
| 6407461 | 7069999 | 1056005 | nitric oxide synthase 2, inducible                     | Nos2   | 24599  | 1,25 | down |
| 6436308 | 7069999 | 1056022 | nitric oxide synthase 2, inducible                     | Nos2   | 24599  | 1,02 | down |
| 6480842 | 7069999 | 1056026 | nitric oxide synthase 2, inducible                     | Nos2   | 24599  | 1,62 | up   |
| 6499390 | 7069999 | 1056008 | nitric oxide synthase 2, inducible                     | Nos2   | 24599  | 1,33 | down |
| 6502156 | 7069999 | 1056006 | nitric oxide synthase 2, inducible                     | Nos2   | 24599  | 1,97 | down |
| 6639973 | 7069999 | 1056025 | nitric oxide synthase 2, inducible                     | Nos2   | 24599  | 1,35 | down |
| 6644809 | 7069999 | 1056016 | nitric oxide synthase 2, inducible                     | Nos2   | 24599  | 1,85 | up   |
| 6663617 | 7069999 | 1056021 | nitric oxide synthase 2, inducible                     | Nos2   | 24599  | 1,37 | down |
| 6730318 | 7069999 | 1056018 | nitric oxide synthase 2, inducible                     | Nos2   | 24599  | 1,71 | up   |
| 5680253 | 7166946 | 1291571 | N-myristoyltransferase 2                               | Nmt2   | 291318 | 1,05 | down |
| 5893027 | 7166946 | 1291569 | N-myristoyltransferase 2                               | Nmt2   | 291318 | 1,55 | up   |
| 5929020 | 7166946 | 1291570 | N-myristoyltransferase 2                               | Nmt2   | 291318 | 1,06 | down |
| 5953041 | 7166946 | 1291568 | N-myristoyltransferase 2                               | Nmt2   | 291318 | 1,41 | down |
| 5990105 | 7166946 | 1291575 | N-myristoyltransferase 2                               | Nmt2   | 291318 | 2,11 | up   |
| 6150514 | 7166946 | 1291572 | N-myristoyltransferase 2                               | Nmt2   | 291318 | 1,29 | up   |
| 6304862 | 7166946 | 1291564 | N-myristoyltransferase 2                               | Nmt2   | 291318 | 1,42 | down |
| 6326257 | 7166946 | 1291567 | N-myristoyltransferase 2                               | Nmt2   | 291318 | 1,17 | down |
| 6359909 | 7166946 | 1291574 | N-myristoyltransferase 2                               | Nmt2   | 291318 | 1,65 | up   |
| 6429043 | 7166946 | 1291566 | N-myristoyltransferase 2                               | Nmt2   | 291318 | 1,04 | down |
| 6560563 | 7166946 | 1291573 | N-myristoyltransferase 2                               | Nmt2   | 291318 | 1,01 | up   |
| 6719692 | 7166946 | 1291565 | N-myristoyltransferase 2                               | Nmt2   | 291318 | 1,20 | down |
| 5769029 | 7081667 | 1083099 | non-metastatic cells 1, protein (NM23A) expressed in   | Nme1   | 191575 | 1,11 | up   |
| 5803091 | 7081667 | 1083098 | non-metastatic cells 1, protein (NM23A) expressed in   | Nme1   | 191575 | 1,05 | up   |
| 5940388 | 7081667 | 1083097 | non-metastatic cells 1, protein (NM23A) expressed in   | Nme1   | 191575 | 1,16 | down |
| 6135992 | 7081667 | 1083095 | non-metastatic cells 1, protein (NM23A) expressed in   | Nme1   | 191575 | 2,31 | down |
| 6204405 | 7081667 | 1083094 | non-metastatic cells 1, protein (NM23A) expressed in   | Nme1   | 191575 | 1,06 | up   |
| 6511085 | 7081667 | 1083096 | non-metastatic cells 1, protein (NM23A) expressed in   | Nme1   | 191575 | 1,09 | up   |
| 5625694 | 7236991 | 1465795 | Notch homolog 1, translocation-associated (Drosophila) | Notch1 | 25496  | 2,01 | up   |
| 5630764 | 7236991 | 1465815 | Notch homolog 1, translocation-associated (Drosophila) | Notch1 | 25496  | 2,28 | down |
| 5681102 | 7236991 | 1465800 | Notch homolog 1, translocation-associated (Drosophila) | Notch1 | 25496  | 1,35 | up   |
| 5700909 | 7236991 | 1465804 | Notch homolog 1, translocation-associated (Drosophila) | Notch1 | 25496  | 1,26 | up   |
| 5717842 | 7236991 | 1465780 | Notch homolog 1, translocation-associated (Drosophila) | Notch1 | 25496  | 1,22 | up   |
| 5751861 | 7236991 | 1465801 | Notch homolog 1, translocation-associated (Drosophila) | Notch1 | 25496  | 1,10 | up   |
| 5779466 | 7236991 | 1465779 | Notch homolog 1, translocation-associated (Drosophila) | Notch1 | 25496  | 1,08 | up   |
| 5785340 | 7236991 | 1465808 | Notch homolog 1, translocation-associated (Drosophila) | Notch1 | 25496  | 1,05 | up   |
| 5840749 | 7236991 | 1465814 | Notch homolog 1, translocation-associated (Drosophila) | Notch1 | 25496  | 1,15 | down |
| 5850132 | 7236991 | 1465810 | Notch homolog 1, translocation-associated (Drosophila) | Notch1 | 25496  | 1,05 | up   |
| 5863340 | 7236991 | 1465797 | Notch homolog 1, translocation-associated (Drosophila) | Notch1 | 25496  | 1,07 | up   |
| 5884390 | 7236991 | 1465807 | Notch homolog 1, translocation-associated (Drosophila) | Notch1 | 25496  | 1,02 | down |
| 5900002 | 7236991 | 1465806 | Notch homolog 1, translocation-associated (Drosophila) | Notch1 | 25496  | 1,03 | down |
| 5906306 | 7236991 | 1465788 | Notch homolog 1, translocation-associated (Drosophila) | Notch1 | 25496  | 1,17 | down |
| 5943239 | 7236991 | 1465798 | Notch homolog 1, translocation-associated (Drosophila) | Notch1 | 25496  | 1,17 | up   |
| 5985041 | 7236991 | 1465782 | Notch homolog 1, translocation-associated (Drosophila) | Notch1 | 25496  | 1,41 | down |
| 5991871 | 7236991 | 1465785 | Notch homolog 1, translocation-associated (Drosophila) | Notch1 | 25496  | 1,06 | up   |
| 6041592 | 7236991 | 1465792 | Notch homolog 1, translocation-associated (Drosophila) | Notch1 | 25496  | 1,20 | up   |
| 6053888 | 7236991 | 1465780 | Notch homolog 1, translocation-associated (Drosophila) | Notch1 | 25496  | 1,14 | up   |
| 6094574 | 7236991 | 1465812 | Notch homolog 1, translocation-associated (Drosophila) | Notch1 | 25496  | 1,19 | down |

|         |         |         |                                                        |        |       |      |      |
|---------|---------|---------|--------------------------------------------------------|--------|-------|------|------|
| 6117693 | 7236991 | 1465809 | Notch homolog 1, translocation-associated (Drosophila) | Notch1 | 25496 | 1,52 | up   |
| 6144851 | 7236991 | 1465781 | Notch homolog 1, translocation-associated (Drosophila) | Notch1 | 25496 | 1,01 | up   |
| 6152244 | 7236991 | 1465791 | Notch homolog 1, translocation-associated (Drosophila) | Notch1 | 25496 | 1,14 | up   |
| 6210990 | 7236991 | 1465803 | Notch homolog 1, translocation-associated (Drosophila) | Notch1 | 25496 | 1,24 | up   |
| 6249445 | 7236991 | 1465805 | Notch homolog 1, translocation-associated (Drosophila) | Notch1 | 25496 | 1,11 | down |
| 6300347 | 7236991 | 1465793 | Notch homolog 1, translocation-associated (Drosophila) | Notch1 | 25496 | 1,01 | down |
| 6385359 | 7236991 | 1465790 | Notch homolog 1, translocation-associated (Drosophila) | Notch1 | 25496 | 1,36 | down |
| 6389112 | 7236991 | 1465777 | Notch homolog 1, translocation-associated (Drosophila) | Notch1 | 25496 | 1,43 | down |
| 6405040 | 7236991 | 1465778 | Notch homolog 1, translocation-associated (Drosophila) | Notch1 | 25496 | 1,06 | down |
| 6430470 | 7236991 | 1465794 | Notch homolog 1, translocation-associated (Drosophila) | Notch1 | 25496 | 1,08 | up   |
| 6551030 | 7236991 | 1465802 | Notch homolog 1, translocation-associated (Drosophila) | Notch1 | 25496 | 1,19 | up   |
| 6618630 | 7236991 | 1465790 | Notch homolog 1, translocation-associated (Drosophila) | Notch1 | 25496 | 1,61 | down |
| 6646802 | 7236991 | 1465777 | Notch homolog 1, translocation-associated (Drosophila) | Notch1 | 25496 | 1,57 | up   |
| 6653503 | 7236991 | 1465781 | Notch homolog 1, translocation-associated (Drosophila) | Notch1 | 25496 | 1,13 | up   |
| 6655392 | 7236991 | 1465796 | Notch homolog 1, translocation-associated (Drosophila) | Notch1 | 25496 | 1,09 | up   |
| 6680573 | 7236991 | 1465789 | Notch homolog 1, translocation-associated (Drosophila) | Notch1 | 25496 | 1,16 | up   |
| 6687666 | 7236991 | 1465811 | Notch homolog 1, translocation-associated (Drosophila) | Notch1 | 25496 | 1,16 | up   |
| 5620983 | 7197253 | 1368317 | Notch homolog 2 (Drosophila)                           | Notch2 | 29492 | 1,12 | down |
| 5667368 | 7197253 | 1368325 | Notch homolog 2 (Drosophila)                           | Notch2 | 29492 | 1,10 | down |
| 5671114 | 7197253 | 1368339 | Notch homolog 2 (Drosophila)                           | Notch2 | 29492 | 1,09 | down |
| 5679724 | 7197253 | 1368319 | Notch homolog 2 (Drosophila)                           | Notch2 | 29492 | 1,80 | up   |
| 5725806 | 7197253 | 1368333 | Notch homolog 2 (Drosophila)                           | Notch2 | 29492 | 1,48 | up   |
| 5763010 | 7197253 | 1368341 | Notch homolog 2 (Drosophila)                           | Notch2 | 29492 | 1,18 | up   |
| 5805793 | 7197253 | 1368327 | Notch homolog 2 (Drosophila)                           | Notch2 | 29492 | 1,32 | up   |
| 5825737 | 7197253 | 1368335 | Notch homolog 2 (Drosophila)                           | Notch2 | 29492 | 1,06 | down |
| 5948332 | 7197253 | 1368338 | Notch homolog 2 (Drosophila)                           | Notch2 | 29492 | 1,40 | down |
| 5988307 | 7197253 | 1368328 | Notch homolog 2 (Drosophila)                           | Notch2 | 29492 | 1,02 | up   |
| 6113621 | 7197253 | 1368323 | Notch homolog 2 (Drosophila)                           | Notch2 | 29492 | 1,12 | up   |
| 6125194 | 7197253 | 1368321 | Notch homolog 2 (Drosophila)                           | Notch2 | 29492 | 1,31 | down |
| 6132046 | 7197253 | 1368342 | Notch homolog 2 (Drosophila)                           | Notch2 | 29492 | 1,76 | up   |
| 6153490 | 7197253 | 1368336 | Notch homolog 2 (Drosophila)                           | Notch2 | 29492 | 1,27 | up   |
| 6184209 | 7197253 | 1368334 | Notch homolog 2 (Drosophila)                           | Notch2 | 29492 | 1,23 | up   |
| 6190403 | 7197253 | 1368326 | Notch homolog 2 (Drosophila)                           | Notch2 | 29492 | 1,38 | up   |
| 6191710 | 7197253 | 1368320 | Notch homolog 2 (Drosophila)                           | Notch2 | 29492 | 1,50 | up   |
| 6193518 | 7197253 | 1368314 | Notch homolog 2 (Drosophila)                           | Notch2 | 29492 | 1,49 | down |
| 6213029 | 7197253 | 1368347 | Notch homolog 2 (Drosophila)                           | Notch2 | 29492 | 1,02 | down |
| 6238091 | 7197253 | 1368344 | Notch homolog 2 (Drosophila)                           | Notch2 | 29492 | 1,19 | down |
| 6266753 | 7197253 | 1368318 | Notch homolog 2 (Drosophila)                           | Notch2 | 29492 | 1,03 | up   |
| 6314797 | 7197253 | 1368337 | Notch homolog 2 (Drosophila)                           | Notch2 | 29492 | 1,07 | down |
| 6319951 | 7197253 | 1368329 | Notch homolog 2 (Drosophila)                           | Notch2 | 29492 | 1,23 | up   |
| 6363888 | 7197253 | 1368316 | Notch homolog 2 (Drosophila)                           | Notch2 | 29492 | 1,01 | down |
| 6424370 | 7197253 | 1368346 | Notch homolog 2 (Drosophila)                           | Notch2 | 29492 | 1,46 | up   |
| 6528349 | 7197253 | 1368331 | Notch homolog 2 (Drosophila)                           | Notch2 | 29492 | 1,02 | up   |
| 6541065 | 7197253 | 1368324 | Notch homolog 2 (Drosophila)                           | Notch2 | 29492 | 1,05 | down |
| 6588966 | 7197253 | 1368315 | Notch homolog 2 (Drosophila)                           | Notch2 | 29492 | 2,65 | up   |
| 6599121 | 7197253 | 1368322 | Notch homolog 2 (Drosophila)                           | Notch2 | 29492 | 1,21 | up   |
| 6623545 | 7197253 | 1368330 | Notch homolog 2 (Drosophila)                           | Notch2 | 29492 | 1,16 | down |
| 6666058 | 7197253 | 1368340 | Notch homolog 2 (Drosophila)                           | Notch2 | 29492 | 1,32 | down |
| 6672910 | 7197253 | 1368345 | Notch homolog 2 (Drosophila)                           | Notch2 | 29492 | 1,87 | down |
| 6702759 | 7197253 | 1368331 | Notch homolog 2 (Drosophila)                           | Notch2 | 29492 | 2,68 | down |
| 6719724 | 7197253 | 1368343 | Notch homolog 2 (Drosophila)                           | Notch2 | 29492 | 1,57 | up   |
| 6743761 | 7197253 | 1368332 | Notch homolog 2 (Drosophila)                           | Notch2 | 29492 | 1,34 | down |
| 5621142 | 7322533 | 1677628 | Notch homolog 3 (Drosophila)                           | Notch3 | 56761 | 1,11 | up   |
| 5659504 | 7322533 | 1677597 | Notch homolog 3 (Drosophila)                           | Notch3 | 56761 | 1,13 | up   |
| 5702821 | 7322533 | 1677601 | Notch homolog 3 (Drosophila)                           | Notch3 | 56761 | 1,08 | up   |
| 5721162 | 7322533 | 1677604 | Notch homolog 3 (Drosophila)                           | Notch3 | 56761 | 1,34 | up   |

|         |         |         |                                              |        |        |      |      |
|---------|---------|---------|----------------------------------------------|--------|--------|------|------|
| 5732745 | 7322533 | 1677622 | Notch homolog 3 (Drosophila)                 | Notch3 | 56761  | 1,07 | down |
| 5753878 | 7322533 | 1677606 | Notch homolog 3 (Drosophila)                 | Notch3 | 56761  | 1,78 | down |
| 5785363 | 7322533 | 1677598 | Notch homolog 3 (Drosophila)                 | Notch3 | 56761  | 1,05 | down |
| 5848413 | 7322533 | 1677608 | Notch homolog 3 (Drosophila)                 | Notch3 | 56761  | 1,48 | up   |
| 5876903 | 7322533 | 1677618 | Notch homolog 3 (Drosophila)                 | Notch3 | 56761  | 1,07 | down |
| 5879620 | 7322533 | 1677607 | Notch homolog 3 (Drosophila)                 | Notch3 | 56761  | 1,06 | up   |
| 5880211 | 7322533 | 1677599 | Notch homolog 3 (Drosophila)                 | Notch3 | 56761  | 1,03 | up   |
| 5885996 | 7322533 | 1677628 | Notch homolog 3 (Drosophila)                 | Notch3 | 56761  | 1,15 | up   |
| 5889055 | 7322533 | 1677614 | Notch homolog 3 (Drosophila)                 | Notch3 | 56761  | 1,46 | up   |
| 5893207 | 7322533 | 1677606 | Notch homolog 3 (Drosophila)                 | Notch3 | 56761  | 1,04 | down |
| 5925606 | 7322533 | 1677625 | Notch homolog 3 (Drosophila)                 | Notch3 | 56761  | 1,33 | down |
| 5955258 | 7322533 | 1677624 | Notch homolog 3 (Drosophila)                 | Notch3 | 56761  | 1,04 | up   |
| 5965730 | 7322533 | 1677611 | Notch homolog 3 (Drosophila)                 | Notch3 | 56761  | 1,20 | down |
| 5966102 | 7322533 | 1677600 | Notch homolog 3 (Drosophila)                 | Notch3 | 56761  | 1,03 | up   |
| 5967898 | 7322533 | 1677615 | Notch homolog 3 (Drosophila)                 | Notch3 | 56761  | 1,38 | down |
| 6004027 | 7322533 | 1677616 | Notch homolog 3 (Drosophila)                 | Notch3 | 56761  | 1,32 | up   |
| 6115260 | 7322533 | 1677612 | Notch homolog 3 (Drosophila)                 | Notch3 | 56761  | 1,04 | down |
| 6129943 | 7322533 | 1677626 | Notch homolog 3 (Drosophila)                 | Notch3 | 56761  | 1,13 | up   |
| 6156815 | 7322533 | 1677605 | Notch homolog 3 (Drosophila)                 | Notch3 | 56761  | 1,43 | down |
| 6163810 | 7322533 | 1677621 | Notch homolog 3 (Drosophila)                 | Notch3 | 56761  | 1,10 | down |
| 6182723 | 7322533 | 1677629 | Notch homolog 3 (Drosophila)                 | Notch3 | 56761  | 2,94 | down |
| 6189042 | 7322533 | 1677604 | Notch homolog 3 (Drosophila)                 | Notch3 | 56761  | 1,11 | up   |
| 6201137 | 7322533 | 1677609 | Notch homolog 3 (Drosophila)                 | Notch3 | 56761  | 1,03 | down |
| 6219380 | 7322533 | 1677610 | Notch homolog 3 (Drosophila)                 | Notch3 | 56761  | 1,02 | up   |
| 6278555 | 7322533 | 1677605 | Notch homolog 3 (Drosophila)                 | Notch3 | 56761  | 1,62 | up   |
| 6284023 | 7322533 | 1677605 | Notch homolog 3 (Drosophila)                 | Notch3 | 56761  | 1,23 | up   |
| 6376488 | 7322533 | 1677620 | Notch homolog 3 (Drosophila)                 | Notch3 | 56761  | 1,01 | up   |
| 6411556 | 7322533 | 1677624 | Notch homolog 3 (Drosophila)                 | Notch3 | 56761  | 1,09 | up   |
| 6415514 | 7322533 | 1677596 | Notch homolog 3 (Drosophila)                 | Notch3 | 56761  | 1,87 | up   |
| 6480293 | 7322533 | 1677626 | Notch homolog 3 (Drosophila)                 | Notch3 | 56761  | 1,17 | down |
| 6563917 | 7322533 | 1677607 | Notch homolog 3 (Drosophila)                 | Notch3 | 56761  | 1,95 | down |
| 6567603 | 7322533 | 1677617 | Notch homolog 3 (Drosophila)                 | Notch3 | 56761  | 1,14 | down |
| 6588265 | 7322533 | 1677627 | Notch homolog 3 (Drosophila)                 | Notch3 | 56761  | 1,28 | down |
| 6597872 | 7322533 | 1677603 | Notch homolog 3 (Drosophila)                 | Notch3 | 56761  | 1,30 | up   |
| 6623491 | 7322533 | 1677623 | Notch homolog 3 (Drosophila)                 | Notch3 | 56761  | 1,64 | down |
| 6625102 | 7322533 | 1677619 | Notch homolog 3 (Drosophila)                 | Notch3 | 56761  | 1,05 | up   |
| 6673063 | 7322533 | 1677602 | Notch homolog 3 (Drosophila)                 | Notch3 | 56761  | 2,77 | down |
| 6674466 | 7322533 | 1677629 | Notch homolog 3 (Drosophila)                 | Notch3 | 56761  | 1,01 | up   |
| 6685650 | 7322533 | 1677613 | Notch homolog 3 (Drosophila)                 | Notch3 | 56761  | 1,13 | down |
| 6733076 | 7322533 | 1677605 | Notch homolog 3 (Drosophila)                 | Notch3 | 56761  | 1,07 | down |
| 5818731 | 7064557 | 1042555 | N-terminal asparagine amidase                | Ntan1  | 360462 | 1,00 | down |
| 5819938 | 7064557 | 1042557 | N-terminal asparagine amidase                | Ntan1  | 360462 | 1,67 | down |
| 5848416 | 7064557 | 1042548 | N-terminal asparagine amidase                | Ntan1  | 360462 | 1,02 | up   |
| 5883368 | 7064557 | 1042554 | N-terminal asparagine amidase                | Ntan1  | 360462 | 1,03 | up   |
| 6043867 | 7064557 | 1042553 | N-terminal asparagine amidase                | Ntan1  | 360462 | 1,16 | down |
| 6192295 | 7064557 | 1042552 | N-terminal asparagine amidase                | Ntan1  | 360462 | 2,20 | down |
| 6332535 | 7064557 | 1042556 | N-terminal asparagine amidase                | Ntan1  | 360462 | 1,13 | down |
| 6341234 | 7064557 | 1042551 | N-terminal asparagine amidase                | Ntan1  | 360462 | 1,27 | down |
| 6453065 | 7064557 | 1042550 | N-terminal asparagine amidase                | Ntan1  | 360462 | 1,16 | up   |
| 6526060 | 7064557 | 1042555 | N-terminal asparagine amidase                | Ntan1  | 360462 | 1,23 | up   |
| 6613434 | 7064557 | 1042549 | N-terminal asparagine amidase                | Ntan1  | 360462 | 1,16 | down |
| 5637538 | 7246866 | 1489790 | N-terminal EF-hand calcium binding protein 3 | Necab3 | 311562 | 1,26 | up   |
| 5641078 | 7246866 | 1489791 | N-terminal EF-hand calcium binding protein 3 | Necab3 | 311562 | 1,07 | up   |
| 5760587 | 7246866 | 1489788 | N-terminal EF-hand calcium binding protein 3 | Necab3 | 311562 | 1,54 | up   |
| 5767515 | 7246866 | 1489787 | N-terminal EF-hand calcium binding protein 3 | Necab3 | 311562 | 1,02 | down |
| 5854101 | 7246866 | 1489796 | N-terminal EF-hand calcium binding protein 3 | Necab3 | 311562 | 1,21 | down |

|         |         |         |                                                                                |        |        |      |      |
|---------|---------|---------|--------------------------------------------------------------------------------|--------|--------|------|------|
| 5858816 | 7246866 | 1489800 | N-terminal EF-hand calcium binding protein 3                                   | Necab3 | 311562 | 1,12 | up   |
| 6173217 | 7246866 | 1489789 | N-terminal EF-hand calcium binding protein 3                                   | Necab3 | 311562 | 1,05 | down |
| 6189712 | 7246866 | 1489791 | N-terminal EF-hand calcium binding protein 3                                   | Necab3 | 311562 | 1,16 | down |
| 6224731 | 7246866 | 1489795 | N-terminal EF-hand calcium binding protein 3                                   | Necab3 | 311562 | 1,06 | down |
| 6261133 | 7246866 | 1489799 | N-terminal EF-hand calcium binding protein 3                                   | Necab3 | 311562 | 2,67 | up   |
| 6291545 | 7246866 | 1489787 | N-terminal EF-hand calcium binding protein 3                                   | Necab3 | 311562 | 1,28 | up   |
| 6393126 | 7246866 | 1489797 | N-terminal EF-hand calcium binding protein 3                                   | Necab3 | 311562 | 1,48 | down |
| 6594938 | 7246866 | 1489787 | N-terminal EF-hand calcium binding protein 3                                   | Necab3 | 311562 | 1,11 | up   |
| 6628766 | 7246866 | 1489791 | N-terminal EF-hand calcium binding protein 3                                   | Necab3 | 311562 | 1,09 | up   |
| 6685343 | 7246866 | 1489791 | N-terminal EF-hand calcium binding protein 3                                   | Necab3 | 311562 | 1,25 | down |
| 5904981 | 7179785 | 1324462 | nuclear factor I/X (CCAAT-binding transcription factor)                        | Nfix   | 81524  | 1,59 | up   |
| 6071631 | 7179785 | 1324496 | nuclear factor I/X (CCAAT-binding transcription factor)                        | Nfix   | 81524  | 3,07 | up   |
| 6181866 | 7179785 | 1324489 | nuclear factor I/X (CCAAT-binding transcription factor)                        | Nfix   | 81524  | 2,63 | up   |
| 6265223 | 7179785 | 1324447 | nuclear factor I/X (CCAAT-binding transcription factor)                        | Nfix   | 81524  | 1,89 | down |
| 6294993 | 7179785 | 1324486 | nuclear factor I/X (CCAAT-binding transcription factor)                        | Nfix   | 81524  | 1,59 | up   |
| 6500614 | 7179785 | 1324487 | nuclear factor I/X (CCAAT-binding transcription factor)                        | Nfix   | 81524  | 1,78 | up   |
| 6577658 | 7179785 | 1324447 | nuclear factor I/X (CCAAT-binding transcription factor)                        | Nfix   | 81524  | 1,30 | down |
| 6604005 | 7179785 | 1324498 | nuclear factor I/X (CCAAT-binding transcription factor)                        | Nfix   | 81524  | 1,45 | up   |
| 6618462 | 7179785 | 1324488 | nuclear factor I/X (CCAAT-binding transcription factor)                        | Nfix   | 81524  | 2,87 | up   |
| 6709887 | 7179785 | 1324492 | nuclear factor I/X (CCAAT-binding transcription factor)                        | Nfix   | 81524  | 1,62 | up   |
| 6716496 | 7179785 | 1324491 | nuclear factor I/X (CCAAT-binding transcription factor)                        | Nfix   | 81524  | 1,26 | down |
| 5724959 | 7132020 | 1206310 | nuclear factor of activated T-cells, cytoplasmic, calcineurin-dependent 4      | Nfatc4 | 305897 | 1,62 | up   |
| 5759157 | 7132020 | 1206315 | nuclear factor of activated T-cells, cytoplasmic, calcineurin-dependent 4      | Nfatc4 | 305897 | 2,29 | down |
| 5898759 | 7132020 | 1206314 | nuclear factor of activated T-cells, cytoplasmic, calcineurin-dependent 4      | Nfatc4 | 305897 | 1,01 | down |
| 6009350 | 7132020 | 1206315 | nuclear factor of activated T-cells, cytoplasmic, calcineurin-dependent 4      | Nfatc4 | 305897 | 1,12 | up   |
| 6046788 | 7132020 | 1206307 | nuclear factor of activated T-cells, cytoplasmic, calcineurin-dependent 4      | Nfatc4 | 305897 | 1,39 | up   |
| 6241776 | 7132020 | 1206315 | nuclear factor of activated T-cells, cytoplasmic, calcineurin-dependent 4      | Nfatc4 | 305897 | 1,22 | down |
| 6284040 | 7132020 | 1206311 | nuclear factor of activated T-cells, cytoplasmic, calcineurin-dependent 4      | Nfatc4 | 305897 | 1,18 | up   |
| 6402953 | 7132020 | 1206305 | nuclear factor of activated T-cells, cytoplasmic, calcineurin-dependent 4      | Nfatc4 | 305897 | 1,57 | down |
| 6415092 | 7132020 | 1206312 | nuclear factor of activated T-cells, cytoplasmic, calcineurin-dependent 4      | Nfatc4 | 305897 | 2,04 | up   |
| 6419161 | 7132020 | 1206309 | nuclear factor of activated T-cells, cytoplasmic, calcineurin-dependent 4      | Nfatc4 | 305897 | 1,25 | down |
| 6501413 | 7132020 | 1206307 | nuclear factor of activated T-cells, cytoplasmic, calcineurin-dependent 4      | Nfatc4 | 305897 | 1,05 | down |
| 6506139 | 7132020 | 1206313 | nuclear factor of activated T-cells, cytoplasmic, calcineurin-dependent 4      | Nfatc4 | 305897 | 2,09 | down |
| 6519923 | 7132020 | 1206308 | nuclear factor of activated T-cells, cytoplasmic, calcineurin-dependent 4      | Nfatc4 | 305897 | 1,14 | up   |
| 6635060 | 7132020 | 1206307 | nuclear factor of activated T-cells, cytoplasmic, calcineurin-dependent 4      | Nfatc4 | 305897 | 1,01 | down |
| 6723353 | 7132020 | 1206305 | nuclear factor of activated T-cells, cytoplasmic, calcineurin-dependent 4      | Nfatc4 | 305897 | 1,83 | up   |
| 5619706 | 7214605 | 1409357 | nuclear factor of kappa light polypeptide gene enhancer in B-cells 1           | Nfkb1  | 81736  | 1,48 | up   |
| 5644871 | 7214605 | 1409354 | nuclear factor of kappa light polypeptide gene enhancer in B-cells 1           | Nfkb1  | 81736  | 1,02 | down |
| 5671374 | 7214605 | 1409362 | nuclear factor of kappa light polypeptide gene enhancer in B-cells 1           | Nfkb1  | 81736  | 1,18 | down |
| 5906117 | 7214605 | 1409351 | nuclear factor of kappa light polypeptide gene enhancer in B-cells 1           | Nfkb1  | 81736  | 1,27 | up   |
| 6039362 | 7214605 | 1409360 | nuclear factor of kappa light polypeptide gene enhancer in B-cells 1           | Nfkb1  | 81736  | 1,11 | up   |
| 6051303 | 7214605 | 1409363 | nuclear factor of kappa light polypeptide gene enhancer in B-cells 1           | Nfkb1  | 81736  | 1,12 | up   |
| 6222253 | 7214605 | 1409358 | nuclear factor of kappa light polypeptide gene enhancer in B-cells 1           | Nfkb1  | 81736  | 1,04 | up   |
| 6465679 | 7214605 | 1409361 | nuclear factor of kappa light polypeptide gene enhancer in B-cells 1           | Nfkb1  | 81736  | 1,42 | up   |
| 6486798 | 7214605 | 1409352 | nuclear factor of kappa light polypeptide gene enhancer in B-cells 1           | Nfkb1  | 81736  | 1,16 | up   |
| 6661295 | 7214605 | 1409351 | nuclear factor of kappa light polypeptide gene enhancer in B-cells 1           | Nfkb1  | 81736  | 1,37 | up   |
| 6683751 | 7214605 | 1409353 | nuclear factor of kappa light polypeptide gene enhancer in B-cells 1           | Nfkb1  | 81736  | 1,26 | up   |
| 6724975 | 7214605 | 1409355 | nuclear factor of kappa light polypeptide gene enhancer in B-cells 1           | Nfkb1  | 81736  | 1,07 | up   |
| 5684871 | 7042559 | 991711  | nuclear factor of kappa light polypeptide gene enhancer in B-cells 2, p49/p100 | Nfkb2  | 309452 | 2,54 | down |
| 5736603 | 7042559 | 991709  | nuclear factor of kappa light polypeptide gene enhancer in B-cells 2, p49/p100 | Nfkb2  | 309452 | 1,19 | down |
| 5776258 | 7042559 | 991708  | nuclear factor of kappa light polypeptide gene enhancer in B-cells 2, p49/p100 | Nfkb2  | 309452 | 1,30 | up   |
| 5890464 | 7042559 | 991704  | nuclear factor of kappa light polypeptide gene enhancer in B-cells 2, p49/p100 | Nfkb2  | 309452 | 1,03 | down |
| 5916136 | 7042559 | 991714  | nuclear factor of kappa light polypeptide gene enhancer in B-cells 2, p49/p100 | Nfkb2  | 309452 | 1,45 | down |
| 5922737 | 7042559 | 991719  | nuclear factor of kappa light polypeptide gene enhancer in B-cells 2, p49/p100 | Nfkb2  | 309452 | 2,13 | down |
| 5962018 | 7042559 | 991701  | nuclear factor of kappa light polypeptide gene enhancer in B-cells 2, p49/p100 | Nfkb2  | 309452 | 1,21 | up   |
| 6027051 | 7042559 | 991716  | nuclear factor of kappa light polypeptide gene enhancer in B-cells 2, p49/p100 | Nfkb2  | 309452 | 1,24 | up   |

|         |         |         |                                                                                     |         |        |      |      |
|---------|---------|---------|-------------------------------------------------------------------------------------|---------|--------|------|------|
| 6035649 | 7042559 | 991720  | nuclear factor of kappa light polypeptide gene enhancer in B-cells 2, p49/p100      | Nfkb2   | 309452 | 1,26 | down |
| 6063623 | 7042559 | 991721  | nuclear factor of kappa light polypeptide gene enhancer in B-cells 2, p49/p100      | Nfkb2   | 309452 | 2,18 | down |
| 6090148 | 7042559 | 991715  | nuclear factor of kappa light polypeptide gene enhancer in B-cells 2, p49/p100      | Nfkb2   | 309452 | 1,24 | down |
| 6130506 | 7042559 | 991705  | nuclear factor of kappa light polypeptide gene enhancer in B-cells 2, p49/p100      | Nfkb2   | 309452 | 1,07 | down |
| 6178644 | 7042559 | 991702  | nuclear factor of kappa light polypeptide gene enhancer in B-cells 2, p49/p100      | Nfkb2   | 309452 | 1,23 | up   |
| 6258109 | 7042559 | 991717  | nuclear factor of kappa light polypeptide gene enhancer in B-cells 2, p49/p100      | Nfkb2   | 309452 | 1,30 | up   |
| 6271070 | 7042559 | 991703  | nuclear factor of kappa light polypeptide gene enhancer in B-cells 2, p49/p100      | Nfkb2   | 309452 | 1,57 | up   |
| 6501307 | 7042559 | 991700  | nuclear factor of kappa light polypeptide gene enhancer in B-cells 2, p49/p100      | Nfkb2   | 309452 | 1,09 | up   |
| 6505225 | 7042559 | 991722  | nuclear factor of kappa light polypeptide gene enhancer in B-cells 2, p49/p100      | Nfkb2   | 309452 | 2,52 | down |
| 6510523 | 7042559 | 991713  | nuclear factor of kappa light polypeptide gene enhancer in B-cells 2, p49/p100      | Nfkb2   | 309452 | 1,30 | up   |
| 6572336 | 7042559 | 991707  | nuclear factor of kappa light polypeptide gene enhancer in B-cells 2, p49/p100      | Nfkb2   | 309452 | 1,47 | up   |
| 6578492 | 7042559 | 991718  | nuclear factor of kappa light polypeptide gene enhancer in B-cells 2, p49/p100      | Nfkb2   | 309452 | 1,10 | down |
| 6581337 | 7042559 | 991710  | nuclear factor of kappa light polypeptide gene enhancer in B-cells 2, p49/p100      | Nfkb2   | 309452 | 2,32 | down |
| 6645463 | 7042559 | 991712  | nuclear factor of kappa light polypeptide gene enhancer in B-cells 2, p49/p100      | Nfkb2   | 309452 | 1,43 | down |
| 6649603 | 7042559 | 991706  | nuclear factor of kappa light polypeptide gene enhancer in B-cells 2, p49/p100      | Nfkb2   | 309452 | 1,29 | up   |
| 5712101 | 7049352 | 1008224 | nuclear factor of kappa light polypeptide gene enhancer in B-cells inhibitor, beta  | Nfkbib  | 81525  | 1,49 | down |
| 5717509 | 7049352 | 1008221 | nuclear factor of kappa light polypeptide gene enhancer in B-cells inhibitor, beta  | Nfkbib  | 81525  | 1,48 | up   |
| 5891222 | 7049352 | 1008226 | nuclear factor of kappa light polypeptide gene enhancer in B-cells inhibitor, beta  | Nfkbib  | 81525  | 1,59 | down |
| 5973372 | 7049352 | 1008220 | nuclear factor of kappa light polypeptide gene enhancer in B-cells inhibitor, beta  | Nfkbib  | 81525  | 2,30 | down |
| 6024930 | 7049352 | 1008225 | nuclear factor of kappa light polypeptide gene enhancer in B-cells inhibitor, beta  | Nfkbib  | 81525  | 1,05 | up   |
| 6086334 | 7049352 | 1008223 | nuclear factor of kappa light polypeptide gene enhancer in B-cells inhibitor, beta  | Nfkbib  | 81525  | 1,81 | down |
| 6299518 | 7049352 | 1008224 | nuclear factor of kappa light polypeptide gene enhancer in B-cells inhibitor, beta  | Nfkbib  | 81525  | 1,26 | up   |
| 6434233 | 7049352 | 1008226 | nuclear factor of kappa light polypeptide gene enhancer in B-cells inhibitor, beta  | Nfkbib  | 81525  | 1,28 | up   |
| 6458087 | 7049352 | 1008224 | nuclear factor of kappa light polypeptide gene enhancer in B-cells inhibitor, beta  | Nfkbib  | 81525  | 1,09 | up   |
| 6498560 | 7049352 | 1008224 | nuclear factor of kappa light polypeptide gene enhancer in B-cells inhibitor, beta  | Nfkbib  | 81525  | 1,12 | up   |
| 6500480 | 7049352 | 1008222 | nuclear factor of kappa light polypeptide gene enhancer in B-cells inhibitor, beta  | Nfkbib  | 81525  | 1,08 | down |
| 5925774 | 7030454 | 961546  | nuclear factor of kappa light polypeptide gene enhancer in B-cells inhibitor, delta | Nfkbid  | 308496 | 1,07 | down |
| 5966474 | 7030454 | 961547  | nuclear factor of kappa light polypeptide gene enhancer in B-cells inhibitor, delta | Nfkbid  | 308496 | 1,20 | down |
| 6207795 | 7030454 | 961548  | nuclear factor of kappa light polypeptide gene enhancer in B-cells inhibitor, delta | Nfkbid  | 308496 | 1,06 | up   |
| 6215632 | 7030454 | 961547  | nuclear factor of kappa light polypeptide gene enhancer in B-cells inhibitor, delta | Nfkbid  | 308496 | 1,11 | down |
| 6353661 | 7030454 | 961555  | nuclear factor of kappa light polypeptide gene enhancer in B-cells inhibitor, delta | Nfkbid  | 308496 | 1,09 | up   |
| 6354198 | 7030454 | 961548  | nuclear factor of kappa light polypeptide gene enhancer in B-cells inhibitor, delta | Nfkbid  | 308496 | 1,25 | up   |
| 6403950 | 7030454 | 961545  | nuclear factor of kappa light polypeptide gene enhancer in B-cells inhibitor, delta | Nfkbid  | 308496 | 1,06 | down |
| 6466099 | 7030454 | 961545  | nuclear factor of kappa light polypeptide gene enhancer in B-cells inhibitor, delta | Nfkbid  | 308496 | 1,63 | down |
| 6685369 | 7030454 | 961548  | nuclear factor of kappa light polypeptide gene enhancer in B-cells inhibitor, delta | Nfkbid  | 308496 | 1,03 | up   |
| 5631712 | 7329341 | 1693883 | nuclear factor of kappa light polypeptide gene enhancer in B-cells inhibitor-like 2 | Nfkbil2 | 366953 | 1,19 | down |
| 5637023 | 7329341 | 1693891 | nuclear factor of kappa light polypeptide gene enhancer in B-cells inhibitor-like 2 | Nfkbil2 | 366953 | 1,00 | down |
| 5687199 | 7329341 | 1693901 | nuclear factor of kappa light polypeptide gene enhancer in B-cells inhibitor-like 2 | Nfkbil2 | 366953 | 2,17 | up   |
| 5687335 | 7329341 | 1693876 | nuclear factor of kappa light polypeptide gene enhancer in B-cells inhibitor-like 2 | Nfkbil2 | 366953 | 1,38 | down |
| 5752878 | 7329341 | 1693893 | nuclear factor of kappa light polypeptide gene enhancer in B-cells inhibitor-like 2 | Nfkbil2 | 366953 | 1,11 | up   |
| 5807637 | 7329341 | 1693896 | nuclear factor of kappa light polypeptide gene enhancer in B-cells inhibitor-like 2 | Nfkbil2 | 366953 | 1,27 | up   |
| 5829062 | 7329341 | 1693892 | nuclear factor of kappa light polypeptide gene enhancer in B-cells inhibitor-like 2 | Nfkbil2 | 366953 | 1,07 | down |
| 5835972 | 7329341 | 1693891 | nuclear factor of kappa light polypeptide gene enhancer in B-cells inhibitor-like 2 | Nfkbil2 | 366953 | 1,32 | down |
| 5844561 | 7329341 | 1693877 | nuclear factor of kappa light polypeptide gene enhancer in B-cells inhibitor-like 2 | Nfkbil2 | 366953 | 1,15 | up   |
| 5984884 | 7329341 | 1693878 | nuclear factor of kappa light polypeptide gene enhancer in B-cells inhibitor-like 2 | Nfkbil2 | 366953 | 1,22 | up   |
| 6002618 | 7329341 | 1693901 | nuclear factor of kappa light polypeptide gene enhancer in B-cells inhibitor-like 2 | Nfkbil2 | 366953 | 1,00 | down |
| 6013282 | 7329341 | 1693885 | nuclear factor of kappa light polypeptide gene enhancer in B-cells inhibitor-like 2 | Nfkbil2 | 366953 | 1,53 | down |
| 6013585 | 7329341 | 1693886 | nuclear factor of kappa light polypeptide gene enhancer in B-cells inhibitor-like 2 | Nfkbil2 | 366953 | 1,31 | down |
| 6015389 | 7329341 | 1693883 | nuclear factor of kappa light polypeptide gene enhancer in B-cells inhibitor-like 2 | Nfkbil2 | 366953 | 1,11 | down |
| 6018585 | 7329341 | 1693900 | nuclear factor of kappa light polypeptide gene enhancer in B-cells inhibitor-like 2 | Nfkbil2 | 366953 | 1,03 | down |
| 6056986 | 7329341 | 1693880 | nuclear factor of kappa light polypeptide gene enhancer in B-cells inhibitor-like 2 | Nfkbil2 | 366953 | 1,01 | down |
| 6155616 | 7329341 | 1693899 | nuclear factor of kappa light polypeptide gene enhancer in B-cells inhibitor-like 2 | Nfkbil2 | 366953 | 1,11 | up   |
| 6167915 | 7329341 | 1693889 | nuclear factor of kappa light polypeptide gene enhancer in B-cells inhibitor-like 2 | Nfkbil2 | 366953 | 1,20 | down |
| 6180553 | 7329341 | 1693881 | nuclear factor of kappa light polypeptide gene enhancer in B-cells inhibitor-like 2 | Nfkbil2 | 366953 | 1,83 | down |
| 6225338 | 7329341 | 1693887 | nuclear factor of kappa light polypeptide gene enhancer in B-cells inhibitor-like 2 | Nfkbil2 | 366953 | 1,35 | up   |
| 6375050 | 7329341 | 1693883 | nuclear factor of kappa light polypeptide gene enhancer in B-cells inhibitor-like 2 | Nfkbil2 | 366953 | 1,10 | up   |

|         |         |         |                                                                                     |         |        |      |      |
|---------|---------|---------|-------------------------------------------------------------------------------------|---------|--------|------|------|
| 6390179 | 7329341 | 1693897 | nuclear factor of kappa light polypeptide gene enhancer in B-cells inhibitor-like 2 | Nfkbil2 | 366953 | 1,00 | up   |
| 6405578 | 7329341 | 1693886 | nuclear factor of kappa light polypeptide gene enhancer in B-cells inhibitor-like 2 | Nfkbil2 | 366953 | 1,06 | up   |
| 6421520 | 7329341 | 1693895 | nuclear factor of kappa light polypeptide gene enhancer in B-cells inhibitor-like 2 | Nfkbil2 | 366953 | 1,01 | down |
| 6427859 | 7329341 | 1693879 | nuclear factor of kappa light polypeptide gene enhancer in B-cells inhibitor-like 2 | Nfkbil2 | 366953 | 1,11 | down |
| 6457709 | 7329341 | 1693885 | nuclear factor of kappa light polypeptide gene enhancer in B-cells inhibitor-like 2 | Nfkbil2 | 366953 | 2,38 | down |
| 6513620 | 7329341 | 1693876 | nuclear factor of kappa light polypeptide gene enhancer in B-cells inhibitor-like 2 | Nfkbil2 | 366953 | 1,33 | up   |
| 6528105 | 7329341 | 1693894 | nuclear factor of kappa light polypeptide gene enhancer in B-cells inhibitor-like 2 | Nfkbil2 | 366953 | 1,13 | down |
| 6550215 | 7329341 | 1693898 | nuclear factor of kappa light polypeptide gene enhancer in B-cells inhibitor-like 2 | Nfkbil2 | 366953 | 1,16 | up   |
| 6570989 | 7329341 | 1693884 | nuclear factor of kappa light polypeptide gene enhancer in B-cells inhibitor-like 2 | Nfkbil2 | 366953 | 1,21 | up   |
| 6580469 | 7329341 | 1693882 | nuclear factor of kappa light polypeptide gene enhancer in B-cells inhibitor-like 2 | Nfkbil2 | 366953 | 1,13 | down |
| 6589272 | 7329341 | 1693882 | nuclear factor of kappa light polypeptide gene enhancer in B-cells inhibitor-like 2 | Nfkbil2 | 366953 | 1,56 | down |
| 5761245 | 7034756 | 973232  | nuclear mitotic apparatus protein 1                                                 | Numa1   | 308870 | 1,50 | down |
| 5771206 | 7034756 | 973239  | nuclear mitotic apparatus protein 1                                                 | Numa1   | 308870 | 1,13 | up   |
| 5782122 | 7034756 | 973233  | nuclear mitotic apparatus protein 1                                                 | Numa1   | 308870 | 1,29 | down |
| 5858984 | 7034756 | 973244  | nuclear mitotic apparatus protein 1                                                 | Numa1   | 308870 | 1,09 | up   |
| 5959322 | 7034756 | 973230  | nuclear mitotic apparatus protein 1                                                 | Numa1   | 308870 | 1,16 | down |
| 6015979 | 7034756 | 973234  | nuclear mitotic apparatus protein 1                                                 | Numa1   | 308870 | 1,28 | down |
| 6041718 | 7034756 | 973241  | nuclear mitotic apparatus protein 1                                                 | Numa1   | 308870 | 1,25 | down |
| 6075664 | 7034756 | 973244  | nuclear mitotic apparatus protein 1                                                 | Numa1   | 308870 | 1,01 | down |
| 6110040 | 7034756 | 973241  | nuclear mitotic apparatus protein 1                                                 | Numa1   | 308870 | 1,14 | down |
| 6207098 | 7034756 | 973238  | nuclear mitotic apparatus protein 1                                                 | Numa1   | 308870 | 1,27 | up   |
| 6439217 | 7034756 | 973229  | nuclear mitotic apparatus protein 1                                                 | Numa1   | 308870 | 1,19 | up   |
| 6463270 | 7034756 | 973242  | nuclear mitotic apparatus protein 1                                                 | Numa1   | 308870 | 1,15 | up   |
| 6563970 | 7034756 | 973244  | nuclear mitotic apparatus protein 1                                                 | Numa1   | 308870 | 1,13 | down |
| 6593874 | 7034756 | 973238  | nuclear mitotic apparatus protein 1                                                 | Numa1   | 308870 | 1,15 | down |
| 6598984 | 7034756 | 973240  | nuclear mitotic apparatus protein 1                                                 | Numa1   | 308870 | 1,36 | up   |
| 6619712 | 7034756 | 973244  | nuclear mitotic apparatus protein 1                                                 | Numa1   | 308870 | 1,34 | down |
| 6650342 | 7034756 | 973234  | nuclear mitotic apparatus protein 1                                                 | Numa1   | 308870 | 1,23 | up   |
| 6725474 | 7034756 | 973231  | nuclear mitotic apparatus protein 1                                                 | Numa1   | 308870 | 1,02 | down |
| 5714703 | 7336276 | 1710239 | nuclear protein, ataxia-telangiectasia locus                                        | Npat    | 315666 | 1,22 | down |
| 5732936 | 7336276 | 1710232 | nuclear protein, ataxia-telangiectasia locus                                        | Npat    | 315666 | 1,20 | up   |
| 5743932 | 7336276 | 1710236 | nuclear protein, ataxia-telangiectasia locus                                        | Npat    | 315666 | 1,26 | down |
| 5746891 | 7336276 | 1710222 | nuclear protein, ataxia-telangiectasia locus                                        | Npat    | 315666 | 1,19 | up   |
| 5760446 | 7336276 | 1710226 | nuclear protein, ataxia-telangiectasia locus                                        | Npat    | 315666 | 1,62 | down |
| 5810194 | 7336276 | 1710239 | nuclear protein, ataxia-telangiectasia locus                                        | Npat    | 315666 | 2,26 | down |
| 5862619 | 7336276 | 1710221 | nuclear protein, ataxia-telangiectasia locus                                        | Npat    | 315666 | 1,38 | down |
| 5883127 | 7336276 | 1710237 | nuclear protein, ataxia-telangiectasia locus                                        | Npat    | 315666 | 1,20 | down |
| 5931317 | 7336276 | 1710234 | nuclear protein, ataxia-telangiectasia locus                                        | Npat    | 315666 | 1,10 | up   |
| 5986659 | 7336276 | 1710225 | nuclear protein, ataxia-telangiectasia locus                                        | Npat    | 315666 | 1,53 | up   |
| 6010246 | 7336276 | 1710228 | nuclear protein, ataxia-telangiectasia locus                                        | Npat    | 315666 | 1,00 | up   |
| 6029352 | 7336276 | 1710237 | nuclear protein, ataxia-telangiectasia locus                                        | Npat    | 315666 | 1,03 | down |
| 6042996 | 7336276 | 1710223 | nuclear protein, ataxia-telangiectasia locus                                        | Npat    | 315666 | 1,01 | down |
| 6057969 | 7336276 | 1710231 | nuclear protein, ataxia-telangiectasia locus                                        | Npat    | 315666 | 1,56 | up   |
| 6072538 | 7336276 | 1710233 | nuclear protein, ataxia-telangiectasia locus                                        | Npat    | 315666 | 1,32 | up   |
| 6286597 | 7336276 | 1710237 | nuclear protein, ataxia-telangiectasia locus                                        | Npat    | 315666 | 1,18 | down |
| 6324713 | 7336276 | 1710234 | nuclear protein, ataxia-telangiectasia locus                                        | Npat    | 315666 | 1,15 | up   |
| 6412716 | 7336276 | 1710237 | nuclear protein, ataxia-telangiectasia locus                                        | Npat    | 315666 | 1,26 | up   |
| 6414157 | 7336276 | 1710229 | nuclear protein, ataxia-telangiectasia locus                                        | Npat    | 315666 | 1,05 | down |
| 6442677 | 7336276 | 1710230 | nuclear protein, ataxia-telangiectasia locus                                        | Npat    | 315666 | 1,24 | up   |
| 6513367 | 7336276 | 1710224 | nuclear protein, ataxia-telangiectasia locus                                        | Npat    | 315666 | 1,05 | up   |
| 6547609 | 7336276 | 1710220 | nuclear protein, ataxia-telangiectasia locus                                        | Npat    | 315666 | 1,17 | up   |
| 6613478 | 7336276 | 1710227 | nuclear protein, ataxia-telangiectasia locus                                        | Npat    | 315666 | 1,32 | up   |
| 6706924 | 7336276 | 1710237 | nuclear protein, ataxia-telangiectasia locus                                        | Npat    | 315666 | 1,07 | down |
| 5668728 | 7098077 | 1122770 | nuclear receptor co-repressor 2                                                     | Ncor2   | 360801 | 1,55 | down |
| 5687305 | 7098077 | 1122797 | nuclear receptor co-repressor 2                                                     | Ncor2   | 360801 | 1,06 | down |
| 5775457 | 7098077 | 1122766 | nuclear receptor co-repressor 2                                                     | Ncor2   | 360801 | 1,10 | up   |



|         |         |         |                                                 |       |        |      |      |
|---------|---------|---------|-------------------------------------------------|-------|--------|------|------|
| 5790690 | 7098077 | 1122779 | nuclear receptor co-repressor 2                 | Ncor2 | 360801 | 1,03 | down |
| 5797186 | 7098077 | 1122777 | nuclear receptor co-repressor 2                 | Ncor2 | 360801 | 1,23 | up   |
| 5804201 | 7098077 | 1122769 | nuclear receptor co-repressor 2                 | Ncor2 | 360801 | 1,11 | up   |
| 5837050 | 7098077 | 1122778 | nuclear receptor co-repressor 2                 | Ncor2 | 360801 | 1,22 | down |
| 5850741 | 7098077 | 1122803 | nuclear receptor co-repressor 2                 | Ncor2 | 360801 | 1,17 | up   |
| 5856485 | 7098077 | 1122739 | nuclear receptor co-repressor 2                 | Ncor2 | 360801 | 1,05 | up   |
| 5857419 | 7098077 | 1122783 | nuclear receptor co-repressor 2                 | Ncor2 | 360801 | 1,05 | up   |
| 5874321 | 7098077 | 1122759 | nuclear receptor co-repressor 2                 | Ncor2 | 360801 | 1,07 | up   |
| 5918392 | 7098077 | 1122792 | nuclear receptor co-repressor 2                 | Ncor2 | 360801 | 1,25 | up   |
| 5944288 | 7098077 | 1122749 | nuclear receptor co-repressor 2                 | Ncor2 | 360801 | 1,06 | up   |
| 5978572 | 7098077 | 1122774 | nuclear receptor co-repressor 2                 | Ncor2 | 360801 | 1,24 | down |
| 6009782 | 7098077 | 1122741 | nuclear receptor co-repressor 2                 | Ncor2 | 360801 | 1,34 | up   |
| 6036506 | 7098077 | 1122796 | nuclear receptor co-repressor 2                 | Ncor2 | 360801 | 1,05 | up   |
| 6041603 | 7098077 | 1122739 | nuclear receptor co-repressor 2                 | Ncor2 | 360801 | 1,09 | up   |
| 6047839 | 7098077 | 1122778 | nuclear receptor co-repressor 2                 | Ncor2 | 360801 | 1,45 | up   |
| 6061946 | 7098077 | 1122801 | nuclear receptor co-repressor 2                 | Ncor2 | 360801 | 1,32 | down |
| 6072809 | 7098077 | 1122789 | nuclear receptor co-repressor 2                 | Ncor2 | 360801 | 1,06 | down |
| 6073980 | 7098077 | 1122806 | nuclear receptor co-repressor 2                 | Ncor2 | 360801 | 1,05 | down |
| 6080095 | 7098077 | 1122754 | nuclear receptor co-repressor 2                 | Ncor2 | 360801 | 1,01 | down |
| 6096997 | 7098077 | 1122808 | nuclear receptor co-repressor 2                 | Ncor2 | 360801 | 1,32 | down |
| 6153224 | 7098077 | 1122762 | nuclear receptor co-repressor 2                 | Ncor2 | 360801 | 1,91 | down |
| 6168790 | 7098077 | 1122797 | nuclear receptor co-repressor 2                 | Ncor2 | 360801 | 1,28 | down |
| 6181644 | 7098077 | 1122793 | nuclear receptor co-repressor 2                 | Ncor2 | 360801 | 1,55 | up   |
| 6210024 | 7098077 | 1122757 | nuclear receptor co-repressor 2                 | Ncor2 | 360801 | 1,06 | up   |
| 6235095 | 7098077 | 1122797 | nuclear receptor co-repressor 2                 | Ncor2 | 360801 | 1,81 | down |
| 6239496 | 7098077 | 1122748 | nuclear receptor co-repressor 2                 | Ncor2 | 360801 | 1,31 | down |
| 6273081 | 7098077 | 1122742 | nuclear receptor co-repressor 2                 | Ncor2 | 360801 | 1,02 | up   |
| 6275532 | 7098077 | 1122799 | nuclear receptor co-repressor 2                 | Ncor2 | 360801 | 1,30 | down |
| 6319372 | 7098077 | 1122782 | nuclear receptor co-repressor 2                 | Ncor2 | 360801 | 1,26 | up   |
| 6324457 | 7098077 | 1122739 | nuclear receptor co-repressor 2                 | Ncor2 | 360801 | 1,19 | down |
| 6337514 | 7098077 | 1122784 | nuclear receptor co-repressor 2                 | Ncor2 | 360801 | 1,08 | up   |
| 6343907 | 7098077 | 1122797 | nuclear receptor co-repressor 2                 | Ncor2 | 360801 | 1,03 | down |
| 6417349 | 7098077 | 1122794 | nuclear receptor co-repressor 2                 | Ncor2 | 360801 | 1,15 | up   |
| 6440854 | 7098077 | 1122744 | nuclear receptor co-repressor 2                 | Ncor2 | 360801 | 1,22 | up   |
| 6445464 | 7098077 | 1122787 | nuclear receptor co-repressor 2                 | Ncor2 | 360801 | 1,13 | down |
| 6452209 | 7098077 | 1122804 | nuclear receptor co-repressor 2                 | Ncor2 | 360801 | 1,08 | down |
| 6474290 | 7098077 | 1122786 | nuclear receptor co-repressor 2                 | Ncor2 | 360801 | 1,00 | down |
| 6487325 | 7098077 | 1122795 | nuclear receptor co-repressor 2                 | Ncor2 | 360801 | 1,03 | down |
| 6488712 | 7098077 | 1122808 | nuclear receptor co-repressor 2                 | Ncor2 | 360801 | 1,16 | down |
| 6519278 | 7098077 | 1122802 | nuclear receptor co-repressor 2                 | Ncor2 | 360801 | 1,01 | up   |
| 6541490 | 7098077 | 1122806 | nuclear receptor co-repressor 2                 | Ncor2 | 360801 | 1,20 | up   |
| 6543455 | 7098077 | 1122788 | nuclear receptor co-repressor 2                 | Ncor2 | 360801 | 1,13 | up   |
| 6563308 | 7098077 | 1122780 | nuclear receptor co-repressor 2                 | Ncor2 | 360801 | 1,08 | up   |
| 6570704 | 7098077 | 1122798 | nuclear receptor co-repressor 2                 | Ncor2 | 360801 | 1,02 | up   |
| 6581651 | 7098077 | 1122755 | nuclear receptor co-repressor 2                 | Ncor2 | 360801 | 1,08 | down |
| 6606655 | 7098077 | 1122746 | nuclear receptor co-repressor 2                 | Ncor2 | 360801 | 1,05 | up   |
| 6608227 | 7098077 | 1122727 | nuclear receptor co-repressor 2                 | Ncor2 | 360801 | 1,27 | down |
| 6623986 | 7098077 | 1122807 | nuclear receptor co-repressor 2                 | Ncor2 | 360801 | 1,21 | down |
| 6637600 | 7098077 | 1122776 | nuclear receptor co-repressor 2                 | Ncor2 | 360801 | 1,34 | up   |
| 6664094 | 7098077 | 1122800 | nuclear receptor co-repressor 2                 | Ncor2 | 360801 | 1,09 | up   |
| 6725487 | 7098077 | 1122782 | nuclear receptor co-repressor 2                 | Ncor2 | 360801 | 1,52 | up   |
| 6725501 | 7098077 | 1122751 | nuclear receptor co-repressor 2                 | Ncor2 | 360801 | 1,18 | up   |
| 5880411 | 7082318 | 1084591 | nuclear receptor subfamily 1, group D, member 1 | Nr1d1 | 252917 | 1,00 | down |
| 5886218 | 7082318 | 1084593 | nuclear receptor subfamily 1, group D, member 1 | Nr1d1 | 252917 | 1,02 | up   |
| 5941021 | 7082318 | 1084592 | nuclear receptor subfamily 1, group D, member 1 | Nr1d1 | 252917 | 1,02 | up   |
| 6013855 | 7082318 | 1084594 | nuclear receptor subfamily 1, group D, member 1 | Nr1d1 | 252917 | 1,02 | up   |

|         |         |         |                                                 |       |        |      |      |
|---------|---------|---------|-------------------------------------------------|-------|--------|------|------|
| 6048483 | 7082318 | 1084597 | nuclear receptor subfamily 1, group D, member 1 | Nr1d1 | 252917 | 2,88 | down |
| 6080374 | 7082318 | 1084598 | nuclear receptor subfamily 1, group D, member 1 | Nr1d1 | 252917 | 1,19 | down |
| 6467664 | 7082318 | 1084596 | nuclear receptor subfamily 1, group D, member 1 | Nr1d1 | 252917 | 1,36 | down |
| 6517957 | 7082318 | 1084595 | nuclear receptor subfamily 1, group D, member 1 | Nr1d1 | 252917 | 1,14 | up   |
| 6566030 | 7082318 | 1084590 | nuclear receptor subfamily 1, group D, member 1 | Nr1d1 | 252917 | 1,08 | down |
| 6693453 | 7082318 | 1084596 | nuclear receptor subfamily 1, group D, member 1 | Nr1d1 | 252917 | 1,76 | up   |
| 5633650 | 7313850 | 1656748 | nuclear receptor subfamily 2, group C, member 1 | Nr2c1 | 252924 | 1,12 | up   |
| 5680235 | 7313850 | 1656754 | nuclear receptor subfamily 2, group C, member 1 | Nr2c1 | 252924 | 2,12 | down |
| 5788346 | 7313850 | 1656756 | nuclear receptor subfamily 2, group C, member 1 | Nr2c1 | 252924 | 1,14 | up   |
| 5824799 | 7313850 | 1656745 | nuclear receptor subfamily 2, group C, member 1 | Nr2c1 | 252924 | 1,12 | up   |
| 5986455 | 7313850 | 1656742 | nuclear receptor subfamily 2, group C, member 1 | Nr2c1 | 252924 | 1,68 | up   |
| 6085358 | 7313850 | 1656749 | nuclear receptor subfamily 2, group C, member 1 | Nr2c1 | 252924 | 1,26 | down |
| 6114211 | 7313850 | 1656758 | nuclear receptor subfamily 2, group C, member 1 | Nr2c1 | 252924 | 1,18 | up   |
| 6132977 | 7313850 | 1656743 | nuclear receptor subfamily 2, group C, member 1 | Nr2c1 | 252924 | 1,08 | up   |
| 6157667 | 7313850 | 1656746 | nuclear receptor subfamily 2, group C, member 1 | Nr2c1 | 252924 | 1,15 | down |
| 6185254 | 7313850 | 1656744 | nuclear receptor subfamily 2, group C, member 1 | Nr2c1 | 252924 | 2,86 | up   |
| 6196350 | 7313850 | 1656755 | nuclear receptor subfamily 2, group C, member 1 | Nr2c1 | 252924 | 1,21 | down |
| 6207969 | 7313850 | 1656750 | nuclear receptor subfamily 2, group C, member 1 | Nr2c1 | 252924 | 1,24 | down |
| 6276479 | 7313850 | 1656753 | nuclear receptor subfamily 2, group C, member 1 | Nr2c1 | 252924 | 1,43 | up   |
| 6316885 | 7313850 | 1656742 | nuclear receptor subfamily 2, group C, member 1 | Nr2c1 | 252924 | 1,26 | up   |
| 6395379 | 7313850 | 1656747 | nuclear receptor subfamily 2, group C, member 1 | Nr2c1 | 252924 | 1,09 | down |
| 6414210 | 7313850 | 1656752 | nuclear receptor subfamily 2, group C, member 1 | Nr2c1 | 252924 | 1,19 | down |
| 6432544 | 7313850 | 1656757 | nuclear receptor subfamily 2, group C, member 1 | Nr2c1 | 252924 | 1,06 | down |
| 6585415 | 7313850 | 1656757 | nuclear receptor subfamily 2, group C, member 1 | Nr2c1 | 252924 | 1,02 | up   |
| 6610305 | 7313850 | 1656753 | nuclear receptor subfamily 2, group C, member 1 | Nr2c1 | 252924 | 1,56 | down |
| 6706727 | 7313850 | 1656751 | nuclear receptor subfamily 2, group C, member 1 | Nr2c1 | 252924 | 1,04 | up   |
| 5714976 | 7201540 | 1379430 | nuclear receptor subfamily 2, group F, member 1 | Nr2f1 | 81808  | 1,21 | up   |
| 5825758 | 7201540 | 1379434 | nuclear receptor subfamily 2, group F, member 1 | Nr2f1 | 81808  | 1,04 | down |
| 6042693 | 7201540 | 1379434 | nuclear receptor subfamily 2, group F, member 1 | Nr2f1 | 81808  | 1,11 | up   |
| 6099301 | 7201540 | 1379434 | nuclear receptor subfamily 2, group F, member 1 | Nr2f1 | 81808  | 1,21 | up   |
| 6116190 | 7201540 | 1379430 | nuclear receptor subfamily 2, group F, member 1 | Nr2f1 | 81808  | 2,69 | down |
| 6312852 | 7201540 | 1379434 | nuclear receptor subfamily 2, group F, member 1 | Nr2f1 | 81808  | 1,04 | down |
| 6396874 | 7201540 | 1379433 | nuclear receptor subfamily 2, group F, member 1 | Nr2f1 | 81808  | 1,10 | down |
| 6493600 | 7201540 | 1379432 | nuclear receptor subfamily 2, group F, member 1 | Nr2f1 | 81808  | 1,50 | down |
| 6524866 | 7201540 | 1379431 | nuclear receptor subfamily 2, group F, member 1 | Nr2f1 | 81808  | 1,02 | down |
| 5807053 | 7239111 | 1471297 | nuclear receptor subfamily 4, group A, member 2 | Nr4a2 | 54278  | 1,68 | up   |
| 5824727 | 7239111 | 1471299 | nuclear receptor subfamily 4, group A, member 2 | Nr4a2 | 54278  | 1,37 | down |
| 5961703 | 7239111 | 1471298 | nuclear receptor subfamily 4, group A, member 2 | Nr4a2 | 54278  | 1,34 | down |
| 6201497 | 7239111 | 1471295 | nuclear receptor subfamily 4, group A, member 2 | Nr4a2 | 54278  | 1,01 | up   |
| 6213739 | 7239111 | 1471300 | nuclear receptor subfamily 4, group A, member 2 | Nr4a2 | 54278  | 2,13 | up   |
| 6662685 | 7239111 | 1471296 | nuclear receptor subfamily 4, group A, member 2 | Nr4a2 | 54278  | 1,30 | down |
| 6733445 | 7239111 | 1471301 | nuclear receptor subfamily 4, group A, member 2 | Nr4a2 | 54278  | 1,02 | up   |
| 5650109 | 7274931 | 1559718 | nuclear receptor subfamily 4, group A, member 3 | Nr4a3 | 58853  | 2,07 | down |
| 5810306 | 7274931 | 1559719 | nuclear receptor subfamily 4, group A, member 3 | Nr4a3 | 58853  | 1,32 | down |
| 5817424 | 7274931 | 1559712 | nuclear receptor subfamily 4, group A, member 3 | Nr4a3 | 58853  | 1,01 | up   |
| 5817700 | 7274931 | 1559715 | nuclear receptor subfamily 4, group A, member 3 | Nr4a3 | 58853  | 1,19 | up   |
| 5835001 | 7274931 | 1559714 | nuclear receptor subfamily 4, group A, member 3 | Nr4a3 | 58853  | 1,20 | down |
| 5854145 | 7274931 | 1559721 | nuclear receptor subfamily 4, group A, member 3 | Nr4a3 | 58853  | 1,53 | down |
| 5857592 | 7274931 | 1559714 | nuclear receptor subfamily 4, group A, member 3 | Nr4a3 | 58853  | 1,63 | down |
| 5860683 | 7274931 | 1559715 | nuclear receptor subfamily 4, group A, member 3 | Nr4a3 | 58853  | 1,16 | down |
| 5898798 | 7274931 | 1559714 | nuclear receptor subfamily 4, group A, member 3 | Nr4a3 | 58853  | 1,61 | down |
| 5995865 | 7274931 | 1559711 | nuclear receptor subfamily 4, group A, member 3 | Nr4a3 | 58853  | 1,55 | down |
| 6002331 | 7274931 | 1559720 | nuclear receptor subfamily 4, group A, member 3 | Nr4a3 | 58853  | 1,01 | up   |
| 6053681 | 7274931 | 1559711 | nuclear receptor subfamily 4, group A, member 3 | Nr4a3 | 58853  | 1,09 | up   |
| 6173481 | 7274931 | 1559716 | nuclear receptor subfamily 4, group A, member 3 | Nr4a3 | 58853  | 1,02 | up   |
| 6200966 | 7274931 | 1559712 | nuclear receptor subfamily 4, group A, member 3 | Nr4a3 | 58853  | 1,92 | down |

|         |         |         |                                                 |        |        |      |      |
|---------|---------|---------|-------------------------------------------------|--------|--------|------|------|
| 6263326 | 7274931 | 1559717 | nuclear receptor subfamily 4, group A, member 3 | Nr4a3  | 58853  | 1,24 | up   |
| 6357381 | 7274931 | 1559717 | nuclear receptor subfamily 4, group A, member 3 | Nr4a3  | 58853  | 1,59 | up   |
| 6361117 | 7274931 | 1559717 | nuclear receptor subfamily 4, group A, member 3 | Nr4a3  | 58853  | 1,46 | up   |
| 6404664 | 7274931 | 1559717 | nuclear receptor subfamily 4, group A, member 3 | Nr4a3  | 58853  | 1,84 | down |
| 6706035 | 7274931 | 1559711 | nuclear receptor subfamily 4, group A, member 3 | Nr4a3  | 58853  | 1,28 | up   |
| 6746188 | 7274931 | 1559713 | nuclear receptor subfamily 4, group A, member 3 | Nr4a3  | 58853  | 1,70 | up   |
| 5624856 | 7120195 | 1177873 | nucleolar protein 14                            | Nol14  | 289724 | 1,05 | up   |
| 5741453 | 7120195 | 1177878 | nucleolar protein 14                            | Nol14  | 289724 | 1,01 | down |
| 5791163 | 7120195 | 1177862 | nucleolar protein 14                            | Nol14  | 289724 | 1,15 | down |
| 5862242 | 7120195 | 1177871 | nucleolar protein 14                            | Nol14  | 289724 | 1,20 | up   |
| 5872625 | 7120195 | 1177877 | nucleolar protein 14                            | Nol14  | 289724 | 1,35 | up   |
| 5967832 | 7120195 | 1177865 | nucleolar protein 14                            | Nol14  | 289724 | 1,28 | up   |
| 6007108 | 7120195 | 1177867 | nucleolar protein 14                            | Nol14  | 289724 | 1,09 | down |
| 6094909 | 7120195 | 1177876 | nucleolar protein 14                            | Nol14  | 289724 | 1,26 | up   |
| 6135975 | 7120195 | 1177863 | nucleolar protein 14                            | Nol14  | 289724 | 1,07 | up   |
| 6192704 | 7120195 | 1177864 | nucleolar protein 14                            | Nol14  | 289724 | 1,02 | down |
| 6199864 | 7120195 | 1177866 | nucleolar protein 14                            | Nol14  | 289724 | 1,17 | up   |
| 6215619 | 7120195 | 1177878 | nucleolar protein 14                            | Nol14  | 289724 | 1,15 | down |
| 6220465 | 7120195 | 1177872 | nucleolar protein 14                            | Nol14  | 289724 | 1,08 | down |
| 6245980 | 7120195 | 1177870 | nucleolar protein 14                            | Nol14  | 289724 | 1,20 | up   |
| 6524298 | 7120195 | 1177861 | nucleolar protein 14                            | Nol14  | 289724 | 1,15 | down |
| 6545800 | 7120195 | 1177875 | nucleolar protein 14                            | Nol14  | 289724 | 1,08 | down |
| 6681927 | 7120195 | 1177868 | nucleolar protein 14                            | Nol14  | 289724 | 1,15 | up   |
| 6687763 | 7120195 | 1177869 | nucleolar protein 14                            | Nol14  | 289724 | 1,13 | up   |
| 6729810 | 7120195 | 1177873 | nucleolar protein 14                            | Nol14  | 289724 | 1,02 | up   |
| 5657228 | 7229856 | 1447096 | nucleoporin 160                                 | Nup160 | 311182 | 1,86 | up   |
| 5665171 | 7229856 | 1447109 | nucleoporin 160                                 | Nup160 | 311182 | 1,86 | down |
| 5679825 | 7229856 | 1447101 | nucleoporin 160                                 | Nup160 | 311182 | 1,27 | up   |
| 5710016 | 7229856 | 1447099 | nucleoporin 160                                 | Nup160 | 311182 | 1,93 | down |
| 5752883 | 7229856 | 1447089 | nucleoporin 160                                 | Nup160 | 311182 | 1,04 | down |
| 5808027 | 7229856 | 1447102 | nucleoporin 160                                 | Nup160 | 311182 | 2,04 | up   |
| 5810128 | 7229856 | 1447108 | nucleoporin 160                                 | Nup160 | 311182 | 1,04 | up   |
| 5985475 | 7229856 | 1447083 | nucleoporin 160                                 | Nup160 | 311182 | 1,20 | up   |
| 6051077 | 7229856 | 1447085 | nucleoporin 160                                 | Nup160 | 311182 | 1,11 | up   |
| 6058241 | 7229856 | 1447105 | nucleoporin 160                                 | Nup160 | 311182 | 1,80 | down |
| 6067090 | 7229856 | 1447088 | nucleoporin 160                                 | Nup160 | 311182 | 1,24 | up   |
| 6103863 | 7229856 | 1447075 | nucleoporin 160                                 | Nup160 | 311182 | 1,05 | down |
| 6114252 | 7229856 | 1447077 | nucleoporin 160                                 | Nup160 | 311182 | 1,24 | down |
| 6138523 | 7229856 | 1447086 | nucleoporin 160                                 | Nup160 | 311182 | 1,17 | up   |
| 6149177 | 7229856 | 1447087 | nucleoporin 160                                 | Nup160 | 311182 | 1,07 | down |
| 6161604 | 7229856 | 1447076 | nucleoporin 160                                 | Nup160 | 311182 | 1,21 | down |
| 6186118 | 7229856 | 1447107 | nucleoporin 160                                 | Nup160 | 311182 | 1,14 | up   |
| 6237251 | 7229856 | 1447082 | nucleoporin 160                                 | Nup160 | 311182 | 1,04 | down |
| 6241529 | 7229856 | 1447093 | nucleoporin 160                                 | Nup160 | 311182 | 1,07 | down |
| 6254302 | 7229856 | 1447092 | nucleoporin 160                                 | Nup160 | 311182 | 1,20 | down |
| 6279556 | 7229856 | 1447095 | nucleoporin 160                                 | Nup160 | 311182 | 1,08 | up   |
| 6282613 | 7229856 | 1447074 | nucleoporin 160                                 | Nup160 | 311182 | 1,17 | up   |
| 6380152 | 7229856 | 1447106 | nucleoporin 160                                 | Nup160 | 311182 | 1,32 | up   |
| 6417777 | 7229856 | 1447103 | nucleoporin 160                                 | Nup160 | 311182 | 1,45 | up   |
| 6419866 | 7229856 | 1447081 | nucleoporin 160                                 | Nup160 | 311182 | 1,20 | down |
| 6436368 | 7229856 | 1447095 | nucleoporin 160                                 | Nup160 | 311182 | 1,19 | up   |
| 6456992 | 7229856 | 1447104 | nucleoporin 160                                 | Nup160 | 311182 | 1,10 | down |
| 6458107 | 7229856 | 1447094 | nucleoporin 160                                 | Nup160 | 311182 | 1,48 | down |
| 6477971 | 7229856 | 1447069 | nucleoporin 160                                 | Nup160 | 311182 | 1,01 | up   |
| 6483171 | 7229856 | 1447109 | nucleoporin 160                                 | Nup160 | 311182 | 1,42 | down |
| 6511888 | 7229856 | 1447068 | nucleoporin 160                                 | Nup160 | 311182 | 1,20 | down |

|         |         |         |                 |        |        |      |      |
|---------|---------|---------|-----------------|--------|--------|------|------|
| 6559290 | 7229856 | 1447097 | nucleoporin 160 | Nup160 | 311182 | 1,06 | down |
| 6584865 | 7229856 | 1447090 | nucleoporin 160 | Nup160 | 311182 | 1,09 | up   |
| 6585657 | 7229856 | 1447069 | nucleoporin 160 | Nup160 | 311182 | 1,86 | down |
| 6618101 | 7229856 | 1447071 | nucleoporin 160 | Nup160 | 311182 | 1,27 | down |
| 6628407 | 7229856 | 1447098 | nucleoporin 160 | Nup160 | 311182 | 1,18 | up   |
| 6642082 | 7229856 | 1447091 | nucleoporin 160 | Nup160 | 311182 | 1,45 | up   |
| 6664645 | 7229856 | 1447100 | nucleoporin 160 | Nup160 | 311182 | 1,33 | up   |
| 5619912 | 7267234 | 1539993 | nucleoporin 210 | Nup210 | 58958  | 1,10 | up   |
| 5624632 | 7267234 | 1539958 | nucleoporin 210 | Nup210 | 58958  | 1,24 | up   |
| 5647521 | 7267234 | 1539991 | nucleoporin 210 | Nup210 | 58958  | 1,08 | up   |
| 5674064 | 7267234 | 1539978 | nucleoporin 210 | Nup210 | 58958  | 1,62 | down |
| 5695162 | 7267234 | 1539979 | nucleoporin 210 | Nup210 | 58958  | 1,29 | down |
| 5730150 | 7267234 | 1539960 | nucleoporin 210 | Nup210 | 58958  | 1,08 | down |
| 5757344 | 7267234 | 1539974 | nucleoporin 210 | Nup210 | 58958  | 1,10 | up   |
| 5784859 | 7267234 | 1539964 | nucleoporin 210 | Nup210 | 58958  | 1,48 | up   |
| 5835000 | 7267234 | 1539973 | nucleoporin 210 | Nup210 | 58958  | 1,30 | up   |
| 5860230 | 7267234 | 1539985 | nucleoporin 210 | Nup210 | 58958  | 1,08 | up   |
| 5892949 | 7267234 | 1539996 | nucleoporin 210 | Nup210 | 58958  | 1,05 | down |
| 5913590 | 7267234 | 1539959 | nucleoporin 210 | Nup210 | 58958  | 1,09 | down |
| 5936929 | 7267234 | 1539986 | nucleoporin 210 | Nup210 | 58958  | 1,16 | up   |
| 6001161 | 7267234 | 1539989 | nucleoporin 210 | Nup210 | 58958  | 1,31 | down |
| 6001509 | 7267234 | 1539980 | nucleoporin 210 | Nup210 | 58958  | 1,00 | up   |
| 6079931 | 7267234 | 1539988 | nucleoporin 210 | Nup210 | 58958  | 1,02 | down |
| 6095349 | 7267234 | 1539969 | nucleoporin 210 | Nup210 | 58958  | 1,77 | up   |
| 6138985 | 7267234 | 1539957 | nucleoporin 210 | Nup210 | 58958  | 1,27 | down |
| 6144398 | 7267234 | 1539967 | nucleoporin 210 | Nup210 | 58958  | 1,45 | down |
| 6147945 | 7267234 | 1539995 | nucleoporin 210 | Nup210 | 58958  | 1,04 | up   |
| 6173094 | 7267234 | 1539963 | nucleoporin 210 | Nup210 | 58958  | 1,05 | down |
| 6178420 | 7267234 | 1539989 | nucleoporin 210 | Nup210 | 58958  | 2,34 | up   |
| 6188115 | 7267234 | 1539968 | nucleoporin 210 | Nup210 | 58958  | 1,18 | down |
| 6210768 | 7267234 | 1539956 | nucleoporin 210 | Nup210 | 58958  | 1,05 | up   |
| 6228547 | 7267234 | 1539961 | nucleoporin 210 | Nup210 | 58958  | 1,04 | up   |
| 6257382 | 7267234 | 1539960 | nucleoporin 210 | Nup210 | 58958  | 1,58 | down |
| 6260496 | 7267234 | 1539965 | nucleoporin 210 | Nup210 | 58958  | 1,05 | up   |
| 6341038 | 7267234 | 1539984 | nucleoporin 210 | Nup210 | 58958  | 1,12 | up   |
| 6343986 | 7267234 | 1539992 | nucleoporin 210 | Nup210 | 58958  | 1,47 | down |
| 6453517 | 7267234 | 1539972 | nucleoporin 210 | Nup210 | 58958  | 1,26 | up   |
| 6464338 | 7267234 | 1539982 | nucleoporin 210 | Nup210 | 58958  | 1,16 | up   |
| 6478793 | 7267234 | 1539970 | nucleoporin 210 | Nup210 | 58958  | 1,11 | up   |
| 6491760 | 7267234 | 1539976 | nucleoporin 210 | Nup210 | 58958  | 1,36 | up   |
| 6501903 | 7267234 | 1539994 | nucleoporin 210 | Nup210 | 58958  | 1,42 | up   |
| 6529474 | 7267234 | 1539981 | nucleoporin 210 | Nup210 | 58958  | 1,24 | down |
| 6547820 | 7267234 | 1539979 | nucleoporin 210 | Nup210 | 58958  | 1,13 | up   |
| 6551135 | 7267234 | 1539962 | nucleoporin 210 | Nup210 | 58958  | 1,10 | up   |
| 6553767 | 7267234 | 1539990 | nucleoporin 210 | Nup210 | 58958  | 1,33 | up   |
| 6607154 | 7267234 | 1539977 | nucleoporin 210 | Nup210 | 58958  | 1,15 | down |
| 6630394 | 7267234 | 1539987 | nucleoporin 210 | Nup210 | 58958  | 1,10 | up   |
| 6645819 | 7267234 | 1539971 | nucleoporin 210 | Nup210 | 58958  | 1,20 | up   |
| 6661213 | 7267234 | 1539955 | nucleoporin 210 | Nup210 | 58958  | 1,14 | down |
| 6715315 | 7267234 | 1539966 | nucleoporin 210 | Nup210 | 58958  | 1,06 | up   |
| 6722207 | 7267234 | 1539983 | nucleoporin 210 | Nup210 | 58958  | 1,24 | up   |
| 6737531 | 7267234 | 1539975 | nucleoporin 210 | Nup210 | 58958  | 1,14 | down |
| 6662167 | 7226241 | 1437812 | nucleoporin 214 | Nup214 | 296634 | 1,06 | up   |
| 5654036 | 7116912 | 1169500 | nucleoporin 54  | Nup54  | 53372  | 1,09 | down |
| 5679153 | 7116912 | 1169502 | nucleoporin 54  | Nup54  | 53372  | 2,04 | down |
| 5804787 | 7116912 | 1169489 | nucleoporin 54  | Nup54  | 53372  | 1,41 | down |

|         |         |         |                                                             |        |        |      |      |
|---------|---------|---------|-------------------------------------------------------------|--------|--------|------|------|
| 5917827 | 7116912 | 1169502 | nucleoporin 54                                              | Nup54  | 53372  | 1,18 | up   |
| 5994441 | 7116912 | 1169493 | nucleoporin 54                                              | Nup54  | 53372  | 1,26 | down |
| 6154436 | 7116912 | 1169490 | nucleoporin 54                                              | Nup54  | 53372  | 1,11 | up   |
| 6196760 | 7116912 | 1169498 | nucleoporin 54                                              | Nup54  | 53372  | 1,39 | up   |
| 6206302 | 7116912 | 1169491 | nucleoporin 54                                              | Nup54  | 53372  | 1,19 | up   |
| 6301246 | 7116912 | 1169501 | nucleoporin 54                                              | Nup54  | 53372  | 1,05 | down |
| 6303936 | 7116912 | 1169496 | nucleoporin 54                                              | Nup54  | 53372  | 1,13 | down |
| 6463960 | 7116912 | 1169489 | nucleoporin 54                                              | Nup54  | 53372  | 1,00 | down |
| 6492285 | 7116912 | 1169491 | nucleoporin 54                                              | Nup54  | 53372  | 1,25 | up   |
| 6511858 | 7116912 | 1169497 | nucleoporin 54                                              | Nup54  | 53372  | 1,14 | down |
| 6549956 | 7116912 | 1169492 | nucleoporin 54                                              | Nup54  | 53372  | 1,01 | down |
| 6630831 | 7116912 | 1169494 | nucleoporin 54                                              | Nup54  | 53372  | 1,09 | down |
| 6669410 | 7116912 | 1169495 | nucleoporin 54                                              | Nup54  | 53372  | 1,20 | up   |
| 6740698 | 7116912 | 1169499 | nucleoporin 54                                              | Nup54  | 53372  | 1,22 | down |
| 5657933 | 7260553 | 1524110 | nucleoporin like 2                                          | Nup12  | 499974 | 1,07 | down |
| 5678268 | 7260553 | 1524114 | nucleoporin like 2                                          | Nup12  | 499974 | 1,02 | up   |
| 5753095 | 7260553 | 1524107 | nucleoporin like 2                                          | Nup12  | 499974 | 1,20 | down |
| 5795794 | 7260553 | 1524109 | nucleoporin like 2                                          | Nup12  | 499974 | 1,02 | up   |
| 6042770 | 7260553 | 1524112 | nucleoporin like 2                                          | Nup12  | 499974 | 1,03 | down |
| 6053103 | 7260553 | 1524115 | nucleoporin like 2                                          | Nup12  | 499974 | 1,65 | down |
| 6087525 | 7260553 | 1524108 | nucleoporin like 2                                          | Nup12  | 499974 | 1,39 | up   |
| 6186893 | 7260553 | 1524108 | nucleoporin like 2                                          | Nup12  | 499974 | 1,08 | down |
| 6221995 | 7260553 | 1524108 | nucleoporin like 2                                          | Nup12  | 499974 | 1,17 | up   |
| 6525737 | 7260553 | 1524111 | nucleoporin like 2                                          | Nup12  | 499974 | 1,16 | up   |
| 6700220 | 7260553 | 1524115 | nucleoporin like 2                                          | Nup12  | 499974 | 1,25 | up   |
| 5733198 | 7265254 | 1535428 | nucleosome assembly protein 1-like 5                        | Nap115 | 688843 | 1,25 | up   |
| 5876164 | 7265254 | 1535428 | nucleosome assembly protein 1-like 5                        | Nap115 | 688843 | 1,61 | down |
| 5902514 | 7265254 | 1535429 | nucleosome assembly protein 1-like 5                        | Nap115 | 688843 | 1,09 | down |
| 5948682 | 7265254 | 1535428 | nucleosome assembly protein 1-like 5                        | Nap115 | 688843 | 1,40 | down |
| 6141675 | 7265254 | 1535429 | nucleosome assembly protein 1-like 5                        | Nap115 | 688843 | 1,19 | up   |
| 6151138 | 7265254 | 1535428 | nucleosome assembly protein 1-like 5                        | Nap115 | 688843 | 1,56 | up   |
| 6206412 | 7265254 | 1535428 | nucleosome assembly protein 1-like 5                        | Nap115 | 688843 | 1,73 | up   |
| 6224543 | 7265254 | 1535429 | nucleosome assembly protein 1-like 5                        | Nap115 | 688843 | 2,03 | up   |
| 6394541 | 7265254 | 1535429 | nucleosome assembly protein 1-like 5                        | Nap115 | 688843 | 1,14 | up   |
| 6444906 | 7265254 | 1535428 | nucleosome assembly protein 1-like 5                        | Nap115 | 688843 | 1,63 | down |
| 6500865 | 7265254 | 1535429 | nucleosome assembly protein 1-like 5                        | Nap115 | 688843 | 1,51 | down |
| 5672581 | 7207758 | 1393831 | nudix (nucleoside diphosphate linked moiety X)-type motif 6 | Nudt6  | 207120 | 1,02 | down |
| 5937125 | 7207758 | 1393828 | nudix (nucleoside diphosphate linked moiety X)-type motif 6 | Nudt6  | 207120 | 1,59 | up   |
| 6108256 | 7207758 | 1393831 | nudix (nucleoside diphosphate linked moiety X)-type motif 6 | Nudt6  | 207120 | 1,00 | down |
| 6149093 | 7207758 | 1393831 | nudix (nucleoside diphosphate linked moiety X)-type motif 6 | Nudt6  | 207120 | 1,09 | up   |
| 6342659 | 7207758 | 1393827 | nudix (nucleoside diphosphate linked moiety X)-type motif 6 | Nudt6  | 207120 | 1,03 | up   |
| 6377540 | 7207758 | 1393830 | nudix (nucleoside diphosphate linked moiety X)-type motif 6 | Nudt6  | 207120 | 2,13 | down |
| 6382563 | 7207758 | 1393830 | nudix (nucleoside diphosphate linked moiety X)-type motif 6 | Nudt6  | 207120 | 1,12 | up   |
| 6417896 | 7207758 | 1393829 | nudix (nucleoside diphosphate linked moiety X)-type motif 6 | Nudt6  | 207120 | 1,84 | down |
| 6440910 | 7207758 | 1393827 | nudix (nucleoside diphosphate linked moiety X)-type motif 6 | Nudt6  | 207120 | 1,14 | up   |
| 6661499 | 7207758 | 1393831 | nudix (nucleoside diphosphate linked moiety X)-type motif 6 | Nudt6  | 207120 | 1,32 | down |
| 5862441 | 7220465 | 1424161 | nurim (nuclear envelope membrane protein)                   | Nrm    | 361791 | 1,17 | down |
| 5973594 | 7220465 | 1424163 | nurim (nuclear envelope membrane protein)                   | Nrm    | 361791 | 2,19 | up   |
| 6413160 | 7220465 | 1424158 | nurim (nuclear envelope membrane protein)                   | Nrm    | 361791 | 1,03 | up   |
| 6463281 | 7220465 | 1424162 | nurim (nuclear envelope membrane protein)                   | Nrm    | 361791 | 2,19 | down |
| 6552040 | 7220465 | 1424160 | nurim (nuclear envelope membrane protein)                   | Nrm    | 361791 | 1,13 | down |
| 6670383 | 7220465 | 1424159 | nurim (nuclear envelope membrane protein)                   | Nrm    | 361791 | 1,29 | down |
| 6695303 | 7220465 | 1424157 | nurim (nuclear envelope membrane protein)                   | Nrm    | 361791 | 1,04 | up   |
| 5631849 | 7379492 | 1819698 | nyctalopin                                                  | Nyx    | 302516 | 1,13 | up   |
| 5791391 | 7379492 | 1819688 | nyctalopin                                                  | Nyx    | 302516 | 1,03 | down |
| 6175063 | 7379492 | 1819689 | nyctalopin                                                  | Nyx    | 302516 | 2,48 | up   |

|         |         |         |                                                           |                   |                   |      |      |
|---------|---------|---------|-----------------------------------------------------------|-------------------|-------------------|------|------|
| 6269140 | 7379492 | 1819689 | nyctalopin                                                | Nyx               | 302516            | 1,00 | down |
| 6502619 | 7379492 | 1819689 | nyctalopin                                                | Nyx               | 302516            | 2,42 | down |
| 5801132 | 7344635 | 1731968 | OAF homolog (Drosophila)                                  | Oaf               | 315594            | 1,08 | down |
| 5916149 | 7344635 | 1731968 | OAF homolog (Drosophila)                                  | Oaf               | 315594            | 1,32 | down |
| 6157603 | 7344635 | 1731966 | OAF homolog (Drosophila)                                  | Oaf               | 315594            | 1,24 | up   |
| 6389303 | 7344635 | 1731967 | OAF homolog (Drosophila)                                  | Oaf               | 315594            | 2,07 | up   |
| 6587592 | 7344635 | 1731968 | OAF homolog (Drosophila)                                  | Oaf               | 315594            | 1,14 | down |
| 6593709 | 7344635 | 1731965 | OAF homolog (Drosophila)                                  | Oaf               | 315594            | 1,31 | up   |
| 6627741 | 7344635 | 1731964 | OAF homolog (Drosophila)                                  | Oaf               | 315594            | 1,32 | down |
| 5827660 | 7240232 | 1474412 | Obg-like ATPase 1                                         | Ola1              | 296488            | 1,39 | down |
| 6196203 | 7240232 | 1474418 | Obg-like ATPase 1                                         | Ola1              | 296488            | 1,85 | down |
| 6341541 | 7240232 | 1474432 | Obg-like ATPase 1                                         | Ola1              | 296488            | 1,75 | down |
| 6368588 | 7240232 | 1474419 | Obg-like ATPase 1                                         | Ola1              | 296488            | 1,63 | up   |
| 6383958 | 7240232 | 1474409 | Obg-like ATPase 1                                         | Ola1              | 296488            | 1,25 | up   |
| 6434294 | 7240232 | 1474408 | Obg-like ATPase 1                                         | Ola1              | 296488            | 1,53 | up   |
| 6572466 | 7240232 | 1474411 | Obg-like ATPase 1                                         | Ola1              | 296488            | 1,37 | up   |
| 6581284 | 7240232 | 1474408 | Obg-like ATPase 1                                         | Ola1              | 296488            | 1,07 | down |
| 6588423 | 7240232 | 1474431 | Obg-like ATPase 1                                         | Ola1              | 296488            | 1,21 | up   |
| 6607206 | 7240232 | 1474420 | Obg-like ATPase 1                                         | Ola1              | 296488            | 1,02 | up   |
| 6655231 | 7240232 | 1474429 | Obg-like ATPase 1                                         | Ola1              | 296488            | 1,29 | up   |
| 6720789 | 7240232 | 1474428 | Obg-like ATPase 1                                         | Ola1              | 296488            | 1,07 | up   |
| 5638701 | 7225328 | 1435391 | odorant binding protein 2B                                | Obp2b             | 286933            | 1,31 | up   |
| 5743918 | 7225328 | 1435393 | odorant binding protein 2B                                | Obp2b             | 286933            | 1,21 | up   |
| 5783287 | 7225328 | 1435392 | odorant binding protein 2B                                | Obp2b             | 286933            | 1,18 | up   |
| 6303312 | 7225328 | 1435390 | odorant binding protein 2B                                | Obp2b             | 286933            | 2,70 | down |
| 6379838 | 7225328 | 1435396 | odorant binding protein 2B                                | Obp2b             | 286933            | 1,01 | down |
| 6559653 | 7225328 | 1435395 | odorant binding protein 2B                                | Obp2b             | 286933            | 1,04 | up   |
| 6643282 | 7225328 | 1435390 | odorant binding protein 2B                                | Obp2b             | 286933            | 1,00 | up   |
| 6720174 | 7225328 | 1435394 | odorant binding protein 2B                                | Obp2b             | 286933            | 1,40 | down |
| 5920167 | 7034293 | 971996  | odz, odd Oz/ten-m homolog 4 (Drosophila)                  | Odz4              | 308831            | 1,11 | down |
| 6023558 | 7034293 | 971819  | odz, odd Oz/ten-m homolog 4 (Drosophila)                  | Odz4              | 308831            | 1,14 | down |
| 6306097 | 7034293 | 971831  | odz, odd Oz/ten-m homolog 4 (Drosophila)                  | Odz4              | 308831            | 1,28 | down |
| 5811110 | 7334987 | 1707175 | olfactory receptor 1259                                   | Olr1259           | 300581            | 1,19 | up   |
| 6245593 | 7334987 | 1707175 | olfactory receptor 1259                                   | Olr1259           | 300581            | 2,41 | up   |
| 6429882 | 7334987 | 1707175 | olfactory receptor 1259                                   | Olr1259           | 300581            | 1,47 | down |
| 6431261 | 7334987 | 1707175 | olfactory receptor 1259                                   | Olr1259           | 300581            | 1,04 | up   |
| 5733473 | 7216309 | 1413743 | olfactory receptor 1748                                   | Olr1748           | 405199            | 1,17 | down |
| 6334613 | 7216309 | 1413742 | olfactory receptor 1748                                   | Olr1748           | 405199            | 3,33 | up   |
| 6023785 | 7226609 | 1438897 | olfactory receptor 400                                    | Olr400            | 296661            | 1,01 | up   |
| 6109040 | 7226609 | 1438896 | olfactory receptor 400                                    | Olr400            | 296661            | 1,19 | down |
| 6165741 | 7226609 | 1438897 | olfactory receptor 400 /// olfactory receptor 403         | Olr400 /// Olr403 | 296661 /// 296666 | 2,09 | up   |
| 5717595 | 7034855 | 973426  | olfactory receptor 59                                     | Olr59             | 170816            | 1,16 | down |
| 5913896 | 7034855 | 973429  | olfactory receptor 59                                     | Olr59             | 170816            | 1,52 | down |
| 5986536 | 7034855 | 973427  | olfactory receptor 59                                     | Olr59             | 170816            | 2,28 | down |
| 6236078 | 7034855 | 973428  | olfactory receptor 59                                     | Olr59             | 170816            | 1,07 | down |
| 6278448 | 7034855 | 973425  | olfactory receptor 59                                     | Olr59             | 170816            | 1,75 | down |
| 6406435 | 7034855 | 973430  | olfactory receptor 59                                     | Olr59             | 170816            | 1,35 | up   |
| 6744675 | 7034855 | 973428  | olfactory receptor 59                                     | Olr59             | 170816            | 1,15 | down |
| 5698568 | 7063484 | 1039573 | oligonucleotide/oligosaccharide-binding fold containing 1 | Obfc1             | 294025            | 1,28 | up   |
| 5707115 | 7063484 | 1039579 | oligonucleotide/oligosaccharide-binding fold containing 1 | Obfc1             | 294025            | 1,25 | down |
| 5833730 | 7063484 | 1039578 | oligonucleotide/oligosaccharide-binding fold containing 1 | Obfc1             | 294025            | 1,64 | up   |
| 5952746 | 7063484 | 1039579 | oligonucleotide/oligosaccharide-binding fold containing 1 | Obfc1             | 294025            | 1,14 | up   |
| 5980821 | 7063484 | 1039574 | oligonucleotide/oligosaccharide-binding fold containing 1 | Obfc1             | 294025            | 1,58 | down |
| 6107204 | 7063484 | 1039574 | oligonucleotide/oligosaccharide-binding fold containing 1 | Obfc1             | 294025            | 1,01 | up   |
| 6202471 | 7063484 | 1039580 | oligonucleotide/oligosaccharide-binding fold containing 1 | Obfc1             | 294025            | 1,13 | up   |
| 6419867 | 7063484 | 1039582 | oligonucleotide/oligosaccharide-binding fold containing 1 | Obfc1             | 294025            | 1,08 | up   |

|         |         |         |                                                           |       |        |      |      |
|---------|---------|---------|-----------------------------------------------------------|-------|--------|------|------|
| 6463334 | 7063484 | 1039575 | oligonucleotide/oligosaccharide-binding fold containing 1 | Obfc1 | 294025 | 1,20 | up   |
| 6548840 | 7063484 | 1039583 | oligonucleotide/oligosaccharide-binding fold containing 1 | Obfc1 | 294025 | 1,43 | down |
| 6700606 | 7063484 | 1039577 | oligonucleotide/oligosaccharide-binding fold containing 1 | Obfc1 | 294025 | 1,14 | up   |
| 6721077 | 7063484 | 1039576 | oligonucleotide/oligosaccharide-binding fold containing 1 | Obfc1 | 294025 | 1,50 | up   |
| 6741593 | 7063484 | 1039581 | oligonucleotide/oligosaccharide-binding fold containing 1 | Obfc1 | 294025 | 2,05 | up   |
| 5637083 | 7204770 | 1386677 | oncostatin M receptor                                     | Osmr  | 310132 | 1,29 | down |
| 5822375 | 7204770 | 1386668 | oncostatin M receptor                                     | Osmr  | 310132 | 1,46 | up   |
| 5869296 | 7204770 | 1386670 | oncostatin M receptor                                     | Osmr  | 310132 | 1,41 | down |
| 5942700 | 7204770 | 1386665 | oncostatin M receptor                                     | Osmr  | 310132 | 1,39 | up   |
| 5947126 | 7204770 | 1386671 | oncostatin M receptor                                     | Osmr  | 310132 | 2,14 | down |
| 5988755 | 7204770 | 1386666 | oncostatin M receptor                                     | Osmr  | 310132 | 1,05 | down |
| 6040049 | 7204770 | 1386663 | oncostatin M receptor                                     | Osmr  | 310132 | 1,47 | up   |
| 6115102 | 7204770 | 1386675 | oncostatin M receptor                                     | Osmr  | 310132 | 1,10 | down |
| 6291398 | 7204770 | 1386678 | oncostatin M receptor                                     | Osmr  | 310132 | 3,40 | down |
| 6331396 | 7204770 | 1386667 | oncostatin M receptor                                     | Osmr  | 310132 | 1,42 | up   |
| 6373654 | 7204770 | 1386672 | oncostatin M receptor                                     | Osmr  | 310132 | 1,61 | down |
| 6457305 | 7204770 | 1386662 | oncostatin M receptor                                     | Osmr  | 310132 | 1,28 | up   |
| 6496371 | 7204770 | 1386674 | oncostatin M receptor                                     | Osmr  | 310132 | 1,08 | up   |
| 6522120 | 7204770 | 1386664 | oncostatin M receptor                                     | Osmr  | 310132 | 2,12 | up   |
| 6531518 | 7204770 | 1386668 | oncostatin M receptor                                     | Osmr  | 310132 | 1,07 | up   |
| 6586488 | 7204770 | 1386669 | oncostatin M receptor                                     | Osmr  | 310132 | 1,11 | up   |
| 6607922 | 7204770 | 1386677 | oncostatin M receptor                                     | Osmr  | 310132 | 1,02 | up   |
| 6614613 | 7204770 | 1386676 | oncostatin M receptor                                     | Osmr  | 310132 | 1,92 | down |
| 6672221 | 7204770 | 1386673 | oncostatin M receptor                                     | Osmr  | 310132 | 1,31 | up   |
| 5879705 | 7111244 | 1155385 | opticin                                                   | Optc  | 304802 | 1,07 | up   |
| 5934391 | 7111244 | 1155390 | opticin                                                   | Optc  | 304802 | 1,17 | down |
| 5953587 | 7111244 | 1155388 | opticin                                                   | Optc  | 304802 | 1,54 | down |
| 5996386 | 7111244 | 1155386 | opticin                                                   | Optc  | 304802 | 1,28 | up   |
| 6111159 | 7111244 | 1155389 | opticin                                                   | Optc  | 304802 | 1,18 | up   |
| 6205184 | 7111244 | 1155392 | opticin                                                   | Optc  | 304802 | 1,06 | down |
| 6330187 | 7111244 | 1155385 | opticin                                                   | Optc  | 304802 | 1,01 | up   |
| 6424007 | 7111244 | 1155384 | opticin                                                   | Optc  | 304802 | 1,09 | down |
| 6579644 | 7111244 | 1155386 | opticin                                                   | Optc  | 304802 | 1,15 | down |
| 5645871 | 7374630 | 1808314 | oral-facial-digital syndrome 1 gene homolog (human)       | Ofd1  | 302661 | 1,09 | up   |
| 5794614 | 7374630 | 1808329 | oral-facial-digital syndrome 1 gene homolog (human)       | Ofd1  | 302661 | 1,17 | up   |
| 5802027 | 7374630 | 1808335 | oral-facial-digital syndrome 1 gene homolog (human)       | Ofd1  | 302661 | 3,11 | up   |
| 5861711 | 7374630 | 1808332 | oral-facial-digital syndrome 1 gene homolog (human)       | Ofd1  | 302661 | 1,18 | up   |
| 5894410 | 7374630 | 1808331 | oral-facial-digital syndrome 1 gene homolog (human)       | Ofd1  | 302661 | 1,14 | down |
| 5945549 | 7374630 | 1808321 | oral-facial-digital syndrome 1 gene homolog (human)       | Ofd1  | 302661 | 1,10 | up   |
| 5965981 | 7374630 | 1808324 | oral-facial-digital syndrome 1 gene homolog (human)       | Ofd1  | 302661 | 1,37 | up   |
| 5973416 | 7374630 | 1808318 | oral-facial-digital syndrome 1 gene homolog (human)       | Ofd1  | 302661 | 1,09 | up   |
| 5994971 | 7374630 | 1808333 | oral-facial-digital syndrome 1 gene homolog (human)       | Ofd1  | 302661 | 1,04 | up   |
| 6042806 | 7374630 | 1808328 | oral-facial-digital syndrome 1 gene homolog (human)       | Ofd1  | 302661 | 1,21 | down |
| 6172509 | 7374630 | 1808330 | oral-facial-digital syndrome 1 gene homolog (human)       | Ofd1  | 302661 | 1,05 | up   |
| 6218012 | 7374630 | 1808316 | oral-facial-digital syndrome 1 gene homolog (human)       | Ofd1  | 302661 | 1,17 | down |
| 6220516 | 7374630 | 1808319 | oral-facial-digital syndrome 1 gene homolog (human)       | Ofd1  | 302661 | 1,17 | up   |
| 6228969 | 7374630 | 1808331 | oral-facial-digital syndrome 1 gene homolog (human)       | Ofd1  | 302661 | 1,00 | up   |
| 6265352 | 7374630 | 1808336 | oral-facial-digital syndrome 1 gene homolog (human)       | Ofd1  | 302661 | 1,15 | up   |
| 6292281 | 7374630 | 1808323 | oral-facial-digital syndrome 1 gene homolog (human)       | Ofd1  | 302661 | 1,04 | down |
| 6301738 | 7374630 | 1808326 | oral-facial-digital syndrome 1 gene homolog (human)       | Ofd1  | 302661 | 1,03 | down |
| 6346815 | 7374630 | 1808325 | oral-facial-digital syndrome 1 gene homolog (human)       | Ofd1  | 302661 | 1,18 | down |
| 6363802 | 7374630 | 1808314 | oral-facial-digital syndrome 1 gene homolog (human)       | Ofd1  | 302661 | 1,11 | down |
| 6494682 | 7374630 | 1808317 | oral-facial-digital syndrome 1 gene homolog (human)       | Ofd1  | 302661 | 1,60 | down |
| 6507336 | 7374630 | 1808322 | oral-facial-digital syndrome 1 gene homolog (human)       | Ofd1  | 302661 | 1,13 | down |
| 6541586 | 7374630 | 1808339 | oral-facial-digital syndrome 1 gene homolog (human)       | Ofd1  | 302661 | 1,24 | up   |
| 6567306 | 7374630 | 1808337 | oral-facial-digital syndrome 1 gene homolog (human)       | Ofd1  | 302661 | 1,31 | down |

|         |         |         |                                                     |        |        |      |      |
|---------|---------|---------|-----------------------------------------------------|--------|--------|------|------|
| 6630626 | 7374630 | 1808327 | oral-facial-digital syndrome 1 gene homolog (human) | Ofd1   | 302661 | 1,03 | up   |
| 6698634 | 7374630 | 1808334 | oral-facial-digital syndrome 1 gene homolog (human) | Ofd1   | 302661 | 1,58 | up   |
| 5877279 | 7279499 | 1571836 | organic solute carrier protein 1                    | Oscp1  | 362595 | 1,30 | down |
| 5960716 | 7279499 | 1571832 | organic solute carrier protein 1                    | Oscp1  | 362595 | 1,24 | up   |
| 5997386 | 7279499 | 1571826 | organic solute carrier protein 1                    | Oscp1  | 362595 | 1,25 | up   |
| 6250444 | 7279499 | 1571830 | organic solute carrier protein 1                    | Oscp1  | 362595 | 1,19 | down |
| 6298264 | 7279499 | 1571818 | organic solute carrier protein 1                    | Oscp1  | 362595 | 1,04 | up   |
| 6345500 | 7279499 | 1571834 | organic solute carrier protein 1                    | Oscp1  | 362595 | 1,63 | up   |
| 6360349 | 7279499 | 1571827 | organic solute carrier protein 1                    | Oscp1  | 362595 | 1,45 | up   |
| 6367228 | 7279499 | 1571831 | organic solute carrier protein 1                    | Oscp1  | 362595 | 1,59 | down |
| 6463739 | 7279499 | 1571824 | organic solute carrier protein 1                    | Oscp1  | 362595 | 1,66 | down |
| 6637536 | 7279499 | 1571835 | organic solute carrier protein 1                    | Oscp1  | 362595 | 1,01 | up   |
| 6658800 | 7279499 | 1571818 | organic solute carrier protein 1                    | Oscp1  | 362595 | 1,35 | up   |
| 6670755 | 7279499 | 1571837 | organic solute carrier protein 1                    | Oscp1  | 362595 | 1,95 | up   |
| 6691472 | 7279499 | 1571834 | organic solute carrier protein 1                    | Oscp1  | 362595 | 1,04 | up   |
| 5680291 | 7362540 | 1775660 | origin recognition complex, subunit 2-like (yeast)  | Orc2l  | 301430 | 1,06 | down |
| 5687851 | 7362540 | 1775661 | origin recognition complex, subunit 2-like (yeast)  | Orc2l  | 301430 | 1,01 | down |
| 5958367 | 7362540 | 1775656 | origin recognition complex, subunit 2-like (yeast)  | Orc2l  | 301430 | 1,07 | down |
| 5960857 | 7362540 | 1775665 | origin recognition complex, subunit 2-like (yeast)  | Orc2l  | 301430 | 1,02 | down |
| 5965325 | 7362540 | 1775672 | origin recognition complex, subunit 2-like (yeast)  | Orc2l  | 301430 | 1,16 | up   |
| 5988522 | 7362540 | 1775657 | origin recognition complex, subunit 2-like (yeast)  | Orc2l  | 301430 | 1,14 | up   |
| 6158406 | 7362540 | 1775659 | origin recognition complex, subunit 2-like (yeast)  | Orc2l  | 301430 | 1,05 | up   |
| 6175557 | 7362540 | 1775664 | origin recognition complex, subunit 2-like (yeast)  | Orc2l  | 301430 | 1,41 | down |
| 6185154 | 7362540 | 1775669 | origin recognition complex, subunit 2-like (yeast)  | Orc2l  | 301430 | 1,05 | down |
| 6229032 | 7362540 | 1775662 | origin recognition complex, subunit 2-like (yeast)  | Orc2l  | 301430 | 1,21 | down |
| 6298142 | 7362540 | 1775663 | origin recognition complex, subunit 2-like (yeast)  | Orc2l  | 301430 | 1,02 | up   |
| 6333477 | 7362540 | 1775668 | origin recognition complex, subunit 2-like (yeast)  | Orc2l  | 301430 | 1,21 | up   |
| 6434165 | 7362540 | 1775665 | origin recognition complex, subunit 2-like (yeast)  | Orc2l  | 301430 | 1,05 | down |
| 6513445 | 7362540 | 1775658 | origin recognition complex, subunit 2-like (yeast)  | Orc2l  | 301430 | 1,01 | up   |
| 6539681 | 7362540 | 1775669 | origin recognition complex, subunit 2-like (yeast)  | Orc2l  | 301430 | 1,01 | up   |
| 6570380 | 7362540 | 1775667 | origin recognition complex, subunit 2-like (yeast)  | Orc2l  | 301430 | 1,00 | down |
| 6575546 | 7362540 | 1775671 | origin recognition complex, subunit 2-like (yeast)  | Orc2l  | 301430 | 1,01 | down |
| 6615982 | 7362540 | 1775670 | origin recognition complex, subunit 2-like (yeast)  | Orc2l  | 301430 | 2,28 | down |
| 6718405 | 7362540 | 1775666 | origin recognition complex, subunit 2-like (yeast)  | Orc2l  | 301430 | 1,29 | down |
| 5636653 | 7249784 | 1496892 | origin recognition complex, subunit 5-like (yeast)  | Orc5l  | 362304 | 1,06 | up   |
| 5748629 | 7249784 | 1496905 | origin recognition complex, subunit 5-like (yeast)  | Orc5l  | 362304 | 1,20 | down |
| 5782469 | 7249784 | 1496899 | origin recognition complex, subunit 5-like (yeast)  | Orc5l  | 362304 | 1,23 | up   |
| 5861815 | 7249784 | 1496894 | origin recognition complex, subunit 5-like (yeast)  | Orc5l  | 362304 | 1,24 | down |
| 5909348 | 7249784 | 1496905 | origin recognition complex, subunit 5-like (yeast)  | Orc5l  | 362304 | 1,23 | up   |
| 6126196 | 7249784 | 1496893 | origin recognition complex, subunit 5-like (yeast)  | Orc5l  | 362304 | 1,41 | up   |
| 6131939 | 7249784 | 1496905 | origin recognition complex, subunit 5-like (yeast)  | Orc5l  | 362304 | 1,12 | up   |
| 6269483 | 7249784 | 1496897 | origin recognition complex, subunit 5-like (yeast)  | Orc5l  | 362304 | 1,21 | down |
| 6296923 | 7249784 | 1496895 | origin recognition complex, subunit 5-like (yeast)  | Orc5l  | 362304 | 1,10 | up   |
| 6332264 | 7249784 | 1496905 | origin recognition complex, subunit 5-like (yeast)  | Orc5l  | 362304 | 2,18 | down |
| 6352467 | 7249784 | 1496902 | origin recognition complex, subunit 5-like (yeast)  | Orc5l  | 362304 | 1,39 | up   |
| 6418071 | 7249784 | 1496901 | origin recognition complex, subunit 5-like (yeast)  | Orc5l  | 362304 | 1,32 | up   |
| 6485113 | 7249784 | 1496900 | origin recognition complex, subunit 5-like (yeast)  | Orc5l  | 362304 | 2,30 | down |
| 6517815 | 7249784 | 1496904 | origin recognition complex, subunit 5-like (yeast)  | Orc5l  | 362304 | 1,35 | down |
| 6520915 | 7249784 | 1496896 | origin recognition complex, subunit 5-like (yeast)  | Orc5l  | 362304 | 1,30 | up   |
| 6521822 | 7249784 | 1496898 | origin recognition complex, subunit 5-like (yeast)  | Orc5l  | 362304 | 1,05 | up   |
| 6676221 | 7249784 | 1496903 | origin recognition complex, subunit 5-like (yeast)  | Orc5l  | 362304 | 1,03 | down |
| 5701857 | 7321465 | 1675744 | ORM1-like 2 (S. cerevisiae)                         | Ormdl2 | 288783 | 1,09 | up   |
| 5759715 | 7321465 | 1675744 | ORM1-like 2 (S. cerevisiae)                         | Ormdl2 | 288783 | 1,18 | up   |
| 5850968 | 7321465 | 1675744 | ORM1-like 2 (S. cerevisiae)                         | Ormdl2 | 288783 | 1,99 | down |
| 6165328 | 7321465 | 1675749 | ORM1-like 2 (S. cerevisiae)                         | Ormdl2 | 288783 | 1,46 | up   |
| 6243058 | 7321465 | 1675744 | ORM1-like 2 (S. cerevisiae)                         | Ormdl2 | 288783 | 2,01 | down |



|         |         |         |                                             |        |        |      |      |
|---------|---------|---------|---------------------------------------------|--------|--------|------|------|
| 6275181 | 7321465 | 1675744 | ORM1-like 2 ( <i>S. cerevisiae</i> )        | Ormdl2 | 288783 | 1,32 | down |
| 6331579 | 7321465 | 1675744 | ORM1-like 2 ( <i>S. cerevisiae</i> )        | Ormdl2 | 288783 | 1,14 | down |
| 5679083 | 7057992 | 1026927 | ornithine aminotransferase (gyrate atrophy) | Oat    | 64313  | 2,34 | down |
| 5901513 | 7057992 | 1026921 | ornithine aminotransferase (gyrate atrophy) | Oat    | 64313  | 1,32 | down |
| 6069167 | 7057992 | 1026919 | ornithine aminotransferase (gyrate atrophy) | Oat    | 64313  | 1,02 | down |
| 6121340 | 7057992 | 1026928 | ornithine aminotransferase (gyrate atrophy) | Oat    | 64313  | 1,48 | down |
| 6173026 | 7057992 | 1026924 | ornithine aminotransferase (gyrate atrophy) | Oat    | 64313  | 1,01 | down |
| 6217869 | 7057992 | 1026922 | ornithine aminotransferase (gyrate atrophy) | Oat    | 64313  | 1,22 | up   |
| 6224354 | 7057992 | 1026918 | ornithine aminotransferase (gyrate atrophy) | Oat    | 64313  | 1,04 | down |
| 6231470 | 7057992 | 1026923 | ornithine aminotransferase (gyrate atrophy) | Oat    | 64313  | 1,42 | up   |
| 6344482 | 7057992 | 1026925 | ornithine aminotransferase (gyrate atrophy) | Oat    | 64313  | 1,04 | up   |
| 6588786 | 7057992 | 1026926 | ornithine aminotransferase (gyrate atrophy) | Oat    | 64313  | 1,02 | up   |
| 6618919 | 7057992 | 1026920 | ornithine aminotransferase (gyrate atrophy) | Oat    | 64313  | 1,27 | down |
| 6418725 | 7036412 | 976848  | otoancorin                                  | Otoa   | 499260 | 1,36 | up   |
| 5654071 | 7032395 | 966595  | OTU domain containing 7A                    | Otud7a | 309252 | 1,36 | down |
| 5723493 | 7032395 | 966612  | OTU domain containing 7A                    | Otud7a | 309252 | 1,46 | up   |
| 5827419 | 7032395 | 966627  | OTU domain containing 7A                    | Otud7a | 309252 | 1,06 | up   |
| 5896022 | 7032395 | 966628  | OTU domain containing 7A                    | Otud7a | 309252 | 1,13 | down |
| 5923174 | 7032395 | 966593  | OTU domain containing 7A                    | Otud7a | 309252 | 1,71 | down |
| 5924827 | 7032395 | 966611  | OTU domain containing 7A                    | Otud7a | 309252 | 1,17 | up   |
| 5969552 | 7032395 | 966626  | OTU domain containing 7A                    | Otud7a | 309252 | 1,03 | down |
| 5989425 | 7032395 | 966627  | OTU domain containing 7A                    | Otud7a | 309252 | 1,32 | down |
| 6031099 | 7032395 | 966622  | OTU domain containing 7A                    | Otud7a | 309252 | 1,11 | up   |
| 6092428 | 7032395 | 966629  | OTU domain containing 7A                    | Otud7a | 309252 | 1,06 | down |
| 6106040 | 7032395 | 966587  | OTU domain containing 7A                    | Otud7a | 309252 | 1,15 | down |
| 6109437 | 7032395 | 966601  | OTU domain containing 7A                    | Otud7a | 309252 | 1,23 | up   |
| 6135108 | 7032395 | 966627  | OTU domain containing 7A                    | Otud7a | 309252 | 1,09 | down |
| 6180470 | 7032395 | 966613  | OTU domain containing 7A                    | Otud7a | 309252 | 2,25 | up   |
| 6223275 | 7032395 | 966602  | OTU domain containing 7A                    | Otud7a | 309252 | 1,09 | up   |
| 6259806 | 7032395 | 966587  | OTU domain containing 7A                    | Otud7a | 309252 | 1,21 | up   |
| 6479557 | 7032395 | 966615  | OTU domain containing 7A                    | Otud7a | 309252 | 1,03 | down |
| 6506786 | 7032395 | 966626  | OTU domain containing 7A                    | Otud7a | 309252 | 1,43 | down |
| 6519715 | 7032395 | 966608  | OTU domain containing 7A                    | Otud7a | 309252 | 1,14 | up   |
| 6569546 | 7032395 | 966626  | OTU domain containing 7A                    | Otud7a | 309252 | 1,10 | down |
| 6580316 | 7032395 | 966626  | OTU domain containing 7A                    | Otud7a | 309252 | 1,24 | down |
| 6600136 | 7032395 | 966621  | OTU domain containing 7A                    | Otud7a | 309252 | 1,14 | up   |
| 5680161 | 7236188 | 1463907 | oxysterol binding protein-like 2            | Osbpl2 | 296461 | 2,28 | down |
| 5696564 | 7236188 | 1463908 | oxysterol binding protein-like 2            | Osbpl2 | 296461 | 1,16 | down |
| 5715301 | 7236188 | 1463904 | oxysterol binding protein-like 2            | Osbpl2 | 296461 | 1,34 | down |
| 5781586 | 7236188 | 1463901 | oxysterol binding protein-like 2            | Osbpl2 | 296461 | 1,22 | up   |
| 5785729 | 7236188 | 1463909 | oxysterol binding protein-like 2            | Osbpl2 | 296461 | 1,10 | down |
| 6003576 | 7236188 | 1463898 | oxysterol binding protein-like 2            | Osbpl2 | 296461 | 1,06 | up   |
| 6021312 | 7236188 | 1463900 | oxysterol binding protein-like 2            | Osbpl2 | 296461 | 1,02 | down |
| 6038629 | 7236188 | 1463905 | oxysterol binding protein-like 2            | Osbpl2 | 296461 | 1,26 | down |
| 6048805 | 7236188 | 1463901 | oxysterol binding protein-like 2            | Osbpl2 | 296461 | 1,38 | down |
| 6063458 | 7236188 | 1463906 | oxysterol binding protein-like 2            | Osbpl2 | 296461 | 1,10 | up   |
| 6087211 | 7236188 | 1463903 | oxysterol binding protein-like 2            | Osbpl2 | 296461 | 1,28 | up   |
| 6117823 | 7236188 | 1463896 | oxysterol binding protein-like 2            | Osbpl2 | 296461 | 1,09 | down |
| 6424711 | 7236188 | 1463902 | oxysterol binding protein-like 2            | Osbpl2 | 296461 | 1,11 | up   |
| 6440696 | 7236188 | 1463897 | oxysterol binding protein-like 2            | Osbpl2 | 296461 | 1,34 | up   |
| 6474472 | 7236188 | 1463908 | oxysterol binding protein-like 2            | Osbpl2 | 296461 | 1,38 | down |
| 6506119 | 7236188 | 1463899 | oxysterol binding protein-like 2            | Osbpl2 | 296461 | 1,18 | up   |
| 6544187 | 7236188 | 1463896 | oxysterol binding protein-like 2            | Osbpl2 | 296461 | 1,03 | down |
| 5642244 | 7071681 | 1060277 | oxysterol binding protein-like 7            | Osbpl7 | 303497 | 1,18 | down |
| 5840827 | 7071681 | 1060277 | oxysterol binding protein-like 7            | Osbpl7 | 303497 | 2,57 | up   |
| 5926248 | 7071681 | 1060283 | oxysterol binding protein-like 7            | Osbpl7 | 303497 | 1,05 | down |

|         |         |         |                                                |        |        |      |      |
|---------|---------|---------|------------------------------------------------|--------|--------|------|------|
| 6013067 | 7071681 | 1060275 | oxysterol binding protein-like 7               | Osbpl7 | 303497 | 1,75 | up   |
| 6145645 | 7071681 | 1060282 | oxysterol binding protein-like 7               | Osbpl7 | 303497 | 1,44 | up   |
| 6184678 | 7071681 | 1060284 | oxysterol binding protein-like 7               | Osbpl7 | 303497 | 1,14 | down |
| 6222890 | 7071681 | 1060283 | oxysterol binding protein-like 7               | Osbpl7 | 303497 | 1,05 | down |
| 6290634 | 7071681 | 1060278 | oxysterol binding protein-like 7               | Osbpl7 | 303497 | 1,18 | up   |
| 6445051 | 7071681 | 1060281 | oxysterol binding protein-like 7               | Osbpl7 | 303497 | 1,16 | up   |
| 6572351 | 7071681 | 1060278 | oxysterol binding protein-like 7               | Osbpl7 | 303497 | 1,12 | down |
| 6613898 | 7071681 | 1060283 | oxysterol binding protein-like 7               | Osbpl7 | 303497 | 1,04 | up   |
| 6631647 | 7071681 | 1060280 | oxysterol binding protein-like 7               | Osbpl7 | 303497 | 1,53 | down |
| 5692938 | 7380381 | 1821554 | p21 (CDKN1A)-activated kinase 3                | Pak3   | 29433  | 2,13 | up   |
| 5706820 | 7380381 | 1821545 | p21 (CDKN1A)-activated kinase 3                | Pak3   | 29433  | 1,09 | down |
| 5735272 | 7380381 | 1821547 | p21 (CDKN1A)-activated kinase 3                | Pak3   | 29433  | 1,74 | down |
| 5760596 | 7380381 | 1821544 | p21 (CDKN1A)-activated kinase 3                | Pak3   | 29433  | 1,78 | down |
| 5770558 | 7380381 | 1821554 | p21 (CDKN1A)-activated kinase 3                | Pak3   | 29433  | 2,90 | up   |
| 5918893 | 7380381 | 1821548 | p21 (CDKN1A)-activated kinase 3                | Pak3   | 29433  | 1,23 | up   |
| 5926553 | 7380381 | 1821540 | p21 (CDKN1A)-activated kinase 3                | Pak3   | 29433  | 1,25 | up   |
| 5936640 | 7380381 | 1821543 | p21 (CDKN1A)-activated kinase 3                | Pak3   | 29433  | 1,21 | down |
| 5937484 | 7380381 | 1821549 | p21 (CDKN1A)-activated kinase 3                | Pak3   | 29433  | 2,50 | up   |
| 6117542 | 7380381 | 1821551 | p21 (CDKN1A)-activated kinase 3                | Pak3   | 29433  | 1,28 | down |
| 6263558 | 7380381 | 1821550 | p21 (CDKN1A)-activated kinase 3                | Pak3   | 29433  | 1,07 | up   |
| 6269970 | 7380381 | 1821544 | p21 (CDKN1A)-activated kinase 3                | Pak3   | 29433  | 1,05 | up   |
| 6312625 | 7380381 | 1821552 | p21 (CDKN1A)-activated kinase 3                | Pak3   | 29433  | 1,13 | down |
| 6394776 | 7380381 | 1821546 | p21 (CDKN1A)-activated kinase 3                | Pak3   | 29433  | 1,89 | up   |
| 6495247 | 7380381 | 1821542 | p21 (CDKN1A)-activated kinase 3                | Pak3   | 29433  | 1,21 | up   |
| 6551649 | 7380381 | 1821541 | p21 (CDKN1A)-activated kinase 3                | Pak3   | 29433  | 1,47 | down |
| 6596304 | 7380381 | 1821553 | p21 (CDKN1A)-activated kinase 3                | Pak3   | 29433  | 1,17 | down |
| 5637453 | 7351951 | 1749856 | p53-associated parkin-like cytoplasmic protein | Parc   | 316228 | 1,06 | up   |
| 5705872 | 7236631 | 1464854 | paired box 8                                   | Pax8   | 81819  | 1,08 | down |
| 5732366 | 7236631 | 1464845 | paired box 8                                   | Pax8   | 81819  | 1,07 | down |
| 5758784 | 7236631 | 1464844 | paired box 8                                   | Pax8   | 81819  | 1,39 | up   |
| 5870196 | 7236631 | 1464844 | paired box 8                                   | Pax8   | 81819  | 1,27 | up   |
| 5914943 | 7236631 | 1464844 | paired box 8                                   | Pax8   | 81819  | 1,19 | up   |
| 5928966 | 7236631 | 1464855 | paired box 8                                   | Pax8   | 81819  | 1,21 | down |
| 5931186 | 7236631 | 1464848 | paired box 8                                   | Pax8   | 81819  | 1,28 | up   |
| 6008186 | 7236631 | 1464844 | paired box 8                                   | Pax8   | 81819  | 1,29 | down |
| 6098139 | 7236631 | 1464847 | paired box 8                                   | Pax8   | 81819  | 1,08 | down |
| 6281432 | 7236631 | 1464851 | paired box 8                                   | Pax8   | 81819  | 1,02 | up   |
| 6293255 | 7236631 | 1464853 | paired box 8                                   | Pax8   | 81819  | 1,83 | down |
| 6294532 | 7236631 | 1464853 | paired box 8                                   | Pax8   | 81819  | 1,59 | up   |
| 6338603 | 7236631 | 1464849 | paired box 8                                   | Pax8   | 81819  | 1,24 | down |
| 6387010 | 7236631 | 1464850 | paired box 8                                   | Pax8   | 81819  | 2,01 | up   |
| 6527044 | 7236631 | 1464854 | paired box 8                                   | Pax8   | 81819  | 1,86 | down |
| 6635493 | 7236631 | 1464846 | paired box 8                                   | Pax8   | 81819  | 1,10 | up   |
| 6722929 | 7236631 | 1464852 | paired box 8                                   | Pax8   | 81819  | 1,58 | down |
| 5780885 | 7155441 | 1264357 | paired-like homeodomain 1                      | Pitx1  | 113983 | 1,08 | up   |
| 6002627 | 7155441 | 1264355 | paired-like homeodomain 1                      | Pitx1  | 113983 | 1,09 | down |
| 6289895 | 7155441 | 1264357 | paired-like homeodomain 1                      | Pitx1  | 113983 | 3,33 | up   |
| 6347903 | 7155441 | 1264354 | paired-like homeodomain 1                      | Pitx1  | 113983 | 1,30 | down |
| 6731097 | 7155441 | 1264356 | paired-like homeodomain 1                      | Pitx1  | 113983 | 1,10 | down |
| 5902066 | 7038669 | 982193  | pan hematopoietic expression                   | Phemx  | 365390 | 1,51 | up   |
| 6270720 | 7038669 | 982192  | pan hematopoietic expression                   | Phemx  | 365390 | 1,68 | down |
| 6290543 | 7038669 | 982182  | pan hematopoietic expression                   | Phemx  | 365390 | 1,12 | up   |
| 6361492 | 7038669 | 982181  | pan hematopoietic expression                   | Phemx  | 365390 | 1,04 | down |
| 6390304 | 7038669 | 982189  | pan hematopoietic expression                   | Phemx  | 365390 | 1,02 | up   |
| 6602941 | 7038669 | 982193  | pan hematopoietic expression                   | Phemx  | 365390 | 1,06 | up   |
| 6657775 | 7038669 | 982190  | pan hematopoietic expression                   | Phemx  | 365390 | 1,05 | down |

|         |         |         |                                                                  |       |        |      |      |
|---------|---------|---------|------------------------------------------------------------------|-------|--------|------|------|
| 6667455 | 7038669 | 982181  | pan hematopoietic expression                                     | Phemx | 365390 | 1,01 | down |
| 5699048 | 7311793 | 1651703 | PAN2 polyA specific ribonuclease subunit homolog (S. cerevisiae) | Pan2  | 408200 | 1,00 | up   |
| 5712894 | 7311793 | 1651710 | PAN2 polyA specific ribonuclease subunit homolog (S. cerevisiae) | Pan2  | 408200 | 1,11 | up   |
| 5746534 | 7311793 | 1651718 | PAN2 polyA specific ribonuclease subunit homolog (S. cerevisiae) | Pan2  | 408200 | 1,18 | up   |
| 5761946 | 7311793 | 1651716 | PAN2 polyA specific ribonuclease subunit homolog (S. cerevisiae) | Pan2  | 408200 | 1,09 | up   |
| 5829721 | 7311793 | 1651715 | PAN2 polyA specific ribonuclease subunit homolog (S. cerevisiae) | Pan2  | 408200 | 1,76 | down |
| 5860749 | 7311793 | 1651719 | PAN2 polyA specific ribonuclease subunit homolog (S. cerevisiae) | Pan2  | 408200 | 1,04 | up   |
| 5971928 | 7311793 | 1651711 | PAN2 polyA specific ribonuclease subunit homolog (S. cerevisiae) | Pan2  | 408200 | 1,29 | down |
| 6001439 | 7311793 | 1651709 | PAN2 polyA specific ribonuclease subunit homolog (S. cerevisiae) | Pan2  | 408200 | 1,25 | down |
| 6103685 | 7311793 | 1651714 | PAN2 polyA specific ribonuclease subunit homolog (S. cerevisiae) | Pan2  | 408200 | 1,15 | down |
| 6120738 | 7311793 | 1651718 | PAN2 polyA specific ribonuclease subunit homolog (S. cerevisiae) | Pan2  | 408200 | 1,26 | down |
| 6168407 | 7311793 | 1651707 | PAN2 polyA specific ribonuclease subunit homolog (S. cerevisiae) | Pan2  | 408200 | 1,15 | up   |
| 6198259 | 7311793 | 1651724 | PAN2 polyA specific ribonuclease subunit homolog (S. cerevisiae) | Pan2  | 408200 | 1,14 | down |
| 6229101 | 7311793 | 1651725 | PAN2 polyA specific ribonuclease subunit homolog (S. cerevisiae) | Pan2  | 408200 | 2,22 | down |
| 6281890 | 7311793 | 1651712 | PAN2 polyA specific ribonuclease subunit homolog (S. cerevisiae) | Pan2  | 408200 | 1,12 | up   |
| 6305381 | 7311793 | 1651704 | PAN2 polyA specific ribonuclease subunit homolog (S. cerevisiae) | Pan2  | 408200 | 1,00 | up   |
| 6327137 | 7311793 | 1651723 | PAN2 polyA specific ribonuclease subunit homolog (S. cerevisiae) | Pan2  | 408200 | 1,11 | down |
| 6338494 | 7311793 | 1651725 | PAN2 polyA specific ribonuclease subunit homolog (S. cerevisiae) | Pan2  | 408200 | 1,19 | down |
| 6379132 | 7311793 | 1651702 | PAN2 polyA specific ribonuclease subunit homolog (S. cerevisiae) | Pan2  | 408200 | 1,42 | up   |
| 6402509 | 7311793 | 1651706 | PAN2 polyA specific ribonuclease subunit homolog (S. cerevisiae) | Pan2  | 408200 | 1,44 | up   |
| 6405396 | 7311793 | 1651713 | PAN2 polyA specific ribonuclease subunit homolog (S. cerevisiae) | Pan2  | 408200 | 1,26 | up   |
| 6434465 | 7311793 | 1651720 | PAN2 polyA specific ribonuclease subunit homolog (S. cerevisiae) | Pan2  | 408200 | 1,15 | down |
| 6474385 | 7311793 | 1651717 | PAN2 polyA specific ribonuclease subunit homolog (S. cerevisiae) | Pan2  | 408200 | 1,17 | up   |
| 6536668 | 7311793 | 1651702 | PAN2 polyA specific ribonuclease subunit homolog (S. cerevisiae) | Pan2  | 408200 | 1,19 | up   |
| 6652706 | 7311793 | 1651724 | PAN2 polyA specific ribonuclease subunit homolog (S. cerevisiae) | Pan2  | 408200 | 1,35 | down |
| 6653543 | 7311793 | 1651705 | PAN2 polyA specific ribonuclease subunit homolog (S. cerevisiae) | Pan2  | 408200 | 1,24 | up   |
| 6658587 | 7311793 | 1651722 | PAN2 polyA specific ribonuclease subunit homolog (S. cerevisiae) | Pan2  | 408200 | 1,07 | up   |
| 6667386 | 7311793 | 1651708 | PAN2 polyA specific ribonuclease subunit homolog (S. cerevisiae) | Pan2  | 408200 | 1,20 | up   |
| 6709644 | 7311793 | 1651721 | PAN2 polyA specific ribonuclease subunit homolog (S. cerevisiae) | Pan2  | 408200 | 1,12 | down |
| 5663025 | 7282155 | 1578263 | pantothenate kinase 4                                            | Pank4 | 171053 | 1,12 | down |
| 5784938 | 7282155 | 1578269 | pantothenate kinase 4                                            | Pank4 | 171053 | 1,19 | up   |
| 5854619 | 7282155 | 1578266 | pantothenate kinase 4                                            | Pank4 | 171053 | 1,05 | down |
| 5933016 | 7282155 | 1578265 | pantothenate kinase 4                                            | Pank4 | 171053 | 1,03 | down |
| 5942628 | 7282155 | 1578264 | pantothenate kinase 4                                            | Pank4 | 171053 | 1,19 | down |
| 5950697 | 7282155 | 1578255 | pantothenate kinase 4                                            | Pank4 | 171053 | 1,51 | down |
| 5961427 | 7282155 | 1578262 | pantothenate kinase 4                                            | Pank4 | 171053 | 1,07 | down |
| 5963985 | 7282155 | 1578257 | pantothenate kinase 4                                            | Pank4 | 171053 | 1,37 | down |
| 6067047 | 7282155 | 1578260 | pantothenate kinase 4                                            | Pank4 | 171053 | 1,13 | up   |
| 6278043 | 7282155 | 1578272 | pantothenate kinase 4                                            | Pank4 | 171053 | 1,16 | up   |
| 6355094 | 7282155 | 1578261 | pantothenate kinase 4                                            | Pank4 | 171053 | 1,18 | up   |
| 6507142 | 7282155 | 1578268 | pantothenate kinase 4                                            | Pank4 | 171053 | 1,58 | down |
| 6541896 | 7282155 | 1578271 | pantothenate kinase 4                                            | Pank4 | 171053 | 1,03 | down |
| 6624566 | 7282155 | 1578267 | pantothenate kinase 4                                            | Pank4 | 171053 | 1,38 | down |
| 6714429 | 7282155 | 1578256 | pantothenate kinase 4                                            | Pank4 | 171053 | 1,09 | down |
| 6729022 | 7282155 | 1578270 | pantothenate kinase 4                                            | Pank4 | 171053 | 2,28 | up   |
| 6741699 | 7282155 | 1578259 | pantothenate kinase 4                                            | Pank4 | 171053 | 1,04 | up   |
| 6745913 | 7282155 | 1578258 | pantothenate kinase 4                                            | Pank4 | 171053 | 1,12 | up   |
| 5624732 | 7182193 | 1330991 | par-3 (partitioning defective 3) homolog (C. elegans)            | Pard3 | 81918  | 1,17 | up   |
| 5699198 | 7182193 | 1331001 | par-3 (partitioning defective 3) homolog (C. elegans)            | Pard3 | 81918  | 1,05 | down |
| 5715046 | 7182193 | 1330997 | par-3 (partitioning defective 3) homolog (C. elegans)            | Pard3 | 81918  | 1,15 | down |
| 5739745 | 7182193 | 1330993 | par-3 (partitioning defective 3) homolog (C. elegans)            | Pard3 | 81918  | 1,32 | up   |
| 5756509 | 7182193 | 1331014 | par-3 (partitioning defective 3) homolog (C. elegans)            | Pard3 | 81918  | 1,12 | up   |
| 5788368 | 7182193 | 1330999 | par-3 (partitioning defective 3) homolog (C. elegans)            | Pard3 | 81918  | 1,14 | down |
| 5798838 | 7182193 | 1330992 | par-3 (partitioning defective 3) homolog (C. elegans)            | Pard3 | 81918  | 1,02 | up   |
| 5840586 | 7182193 | 1331010 | par-3 (partitioning defective 3) homolog (C. elegans)            | Pard3 | 81918  | 1,07 | up   |
| 5842476 | 7182193 | 1331012 | par-3 (partitioning defective 3) homolog (C. elegans)            | Pard3 | 81918  | 1,26 | down |

|         |         |         |                                                                  |        |           |      |      |
|---------|---------|---------|------------------------------------------------------------------|--------|-----------|------|------|
| 5913358 | 7182193 | 1330994 | par-3 (partitioning defective 3) homolog (C. elegans)            | Pard3  | 81918     | 1,39 | up   |
| 6011357 | 7182193 | 1331009 | par-3 (partitioning defective 3) homolog (C. elegans)            | Pard3  | 81918     | 1,11 | down |
| 6038069 | 7182193 | 1331014 | par-3 (partitioning defective 3) homolog (C. elegans)            | Pard3  | 81918     | 3,32 | down |
| 6059407 | 7182193 | 1331000 | par-3 (partitioning defective 3) homolog (C. elegans)            | Pard3  | 81918     | 1,02 | up   |
| 6081773 | 7182193 | 1330990 | par-3 (partitioning defective 3) homolog (C. elegans)            | Pard3  | 81918     | 1,40 | up   |
| 6110432 | 7182193 | 1331015 | par-3 (partitioning defective 3) homolog (C. elegans)            | Pard3  | 81918     | 1,10 | up   |
| 6163604 | 7182193 | 1331015 | par-3 (partitioning defective 3) homolog (C. elegans)            | Pard3  | 81918     | 1,26 | down |
| 6177779 | 7182193 | 1331013 | par-3 (partitioning defective 3) homolog (C. elegans)            | Pard3  | 81918     | 1,03 | down |
| 6188010 | 7182193 | 1330996 | par-3 (partitioning defective 3) homolog (C. elegans)            | Pard3  | 81918     | 1,04 | down |
| 6197007 | 7182193 | 1331006 | par-3 (partitioning defective 3) homolog (C. elegans)            | Pard3  | 81918     | 1,01 | down |
| 6201007 | 7182193 | 1331008 | par-3 (partitioning defective 3) homolog (C. elegans)            | Pard3  | 81918     | 2,63 | down |
| 6274650 | 7182193 | 1331007 | par-3 (partitioning defective 3) homolog (C. elegans)            | Pard3  | 81918     | 1,04 | down |
| 6322481 | 7182193 | 1331011 | par-3 (partitioning defective 3) homolog (C. elegans)            | Pard3  | 81918     | 1,34 | down |
| 6322670 | 7182193 | 1331008 | par-3 (partitioning defective 3) homolog (C. elegans)            | Pard3  | 81918     | 2,33 | down |
| 6369938 | 7182193 | 1331003 | par-3 (partitioning defective 3) homolog (C. elegans)            | Pard3  | 81918     | 1,03 | down |
| 6388034 | 7182193 | 1330995 | par-3 (partitioning defective 3) homolog (C. elegans)            | Pard3  | 81918     | 1,35 | down |
| 6430681 | 7182193 | 1331011 | par-3 (partitioning defective 3) homolog (C. elegans)            | Pard3  | 81918     | 1,47 | up   |
| 6467714 | 7182193 | 1331002 | par-3 (partitioning defective 3) homolog (C. elegans)            | Pard3  | 81918     | 1,35 | up   |
| 6598065 | 7182193 | 1330998 | par-3 (partitioning defective 3) homolog (C. elegans)            | Pard3  | 81918     | 1,24 | down |
| 6598823 | 7182193 | 1330993 | par-3 (partitioning defective 3) homolog (C. elegans)            | Pard3  | 81918     | 1,17 | up   |
| 6615266 | 7182193 | 1331004 | par-3 (partitioning defective 3) homolog (C. elegans)            | Pard3  | 81918     | 1,16 | up   |
| 6727050 | 7182193 | 1331005 | par-3 (partitioning defective 3) homolog (C. elegans)            | Pard3  | 81918     | 1,10 | up   |
| 5933962 | 7269588 | 1546138 | parathymosin                                                     | Ptms   | 83801     | 1,12 | up   |
| 5946390 | 7269588 | 1546140 | parathymosin                                                     | Ptms   | 83801     | 3,07 | up   |
| 6338617 | 7269588 | 1546139 | parathymosin                                                     | Ptms   | 83801     | 1,46 | down |
| 6476122 | 7269588 | 1546141 | parathymosin                                                     | Ptms   | 83801     | 1,16 | up   |
| 6626702 | 7269588 | 1546137 | parathymosin                                                     | Ptms   | 83801     | 1,01 | down |
| 5668437 | 7356001 | 1759919 | paroxysmal nonkinesiogenic dyskinesia                            | Pnkd   | 100188944 | 1,15 | down |
| 5764926 | 7356001 | 1759926 | paroxysmal nonkinesiogenic dyskinesia                            | Pnkd   | 100188944 | 1,35 | down |
| 5822963 | 7356001 | 1759929 | paroxysmal nonkinesiogenic dyskinesia                            | Pnkd   | 100188944 | 1,25 | up   |
| 5848405 | 7356001 | 1759920 | paroxysmal nonkinesiogenic dyskinesia                            | Pnkd   | 100188944 | 1,12 | down |
| 5934361 | 7356001 | 1759933 | paroxysmal nonkinesiogenic dyskinesia                            | Pnkd   | 100188944 | 1,29 | up   |
| 6099929 | 7356001 | 1759927 | paroxysmal nonkinesiogenic dyskinesia                            | Pnkd   | 100188944 | 1,01 | up   |
| 6299844 | 7356001 | 1759931 | paroxysmal nonkinesiogenic dyskinesia                            | Pnkd   | 100188944 | 1,10 | up   |
| 6338912 | 7356001 | 1759923 | paroxysmal nonkinesiogenic dyskinesia                            | Pnkd   | 100188944 | 1,09 | up   |
| 6358733 | 7356001 | 1759919 | paroxysmal nonkinesiogenic dyskinesia                            | Pnkd   | 100188944 | 1,23 | up   |
| 6391544 | 7356001 | 1759930 | paroxysmal nonkinesiogenic dyskinesia                            | Pnkd   | 100188944 | 1,38 | up   |
| 6479567 | 7356001 | 1759932 | paroxysmal nonkinesiogenic dyskinesia                            | Pnkd   | 100188944 | 1,23 | down |
| 6517176 | 7356001 | 1759924 | paroxysmal nonkinesiogenic dyskinesia                            | Pnkd   | 100188944 | 1,26 | down |
| 6552845 | 7356001 | 1759920 | paroxysmal nonkinesiogenic dyskinesia                            | Pnkd   | 100188944 | 1,04 | up   |
| 6568451 | 7356001 | 1759925 | paroxysmal nonkinesiogenic dyskinesia                            | Pnkd   | 100188944 | 1,29 | down |
| 6589933 | 7356001 | 1759928 | paroxysmal nonkinesiogenic dyskinesia                            | Pnkd   | 100188944 | 1,20 | down |
| 5742624 | 7128434 | 1197437 | partner of NOB1 homolog (S. cerevisiae)                          | Pno1   | 289809    | 1,03 | up   |
| 5875169 | 7128434 | 1197440 | partner of NOB1 homolog (S. cerevisiae)                          | Pno1   | 289809    | 1,02 | up   |
| 5950151 | 7128434 | 1197437 | partner of NOB1 homolog (S. cerevisiae)                          | Pno1   | 289809    | 1,16 | down |
| 5995961 | 7128434 | 1197444 | partner of NOB1 homolog (S. cerevisiae)                          | Pno1   | 289809    | 1,06 | up   |
| 6046222 | 7128434 | 1197442 | partner of NOB1 homolog (S. cerevisiae)                          | Pno1   | 289809    | 1,28 | up   |
| 6112196 | 7128434 | 1197441 | partner of NOB1 homolog (S. cerevisiae)                          | Pno1   | 289809    | 1,04 | up   |
| 6155480 | 7128434 | 1197443 | partner of NOB1 homolog (S. cerevisiae)                          | Pno1   | 289809    | 1,19 | up   |
| 6466354 | 7128434 | 1197439 | partner of NOB1 homolog (S. cerevisiae)                          | Pno1   | 289809    | 1,09 | down |
| 6656701 | 7128434 | 1197438 | partner of NOB1 homolog (S. cerevisiae)                          | Pno1   | 289809    | 2,09 | up   |
| 5634242 | 7249388 | 1495907 | PAX interacting (with transcription-activation domain) protein 1 | Paxip1 | 311944    | 1,82 | down |
| 5734906 | 7249388 | 1495907 | PAX interacting (with transcription-activation domain) protein 1 | Paxip1 | 311944    | 1,79 | up   |
| 5769638 | 7249388 | 1495901 | PAX interacting (with transcription-activation domain) protein 1 | Paxip1 | 311944    | 1,07 | down |
| 5790955 | 7249388 | 1495907 | PAX interacting (with transcription-activation domain) protein 1 | Paxip1 | 311944    | 1,88 | up   |
| 5831597 | 7249388 | 1495889 | PAX interacting (with transcription-activation domain) protein 1 | Paxip1 | 311944    | 1,24 | up   |

|         |         |         |                                                                  |        |        |      |      |
|---------|---------|---------|------------------------------------------------------------------|--------|--------|------|------|
| 5831703 | 7249388 | 1495893 | PAX interacting (with transcription-activation domain) protein 1 | Paxip1 | 311944 | 1,10 | up   |
| 5856640 | 7249388 | 1495907 | PAX interacting (with transcription-activation domain) protein 1 | Paxip1 | 311944 | 1,23 | up   |
| 5930958 | 7249388 | 1495891 | PAX interacting (with transcription-activation domain) protein 1 | Paxip1 | 311944 | 1,11 | up   |
| 5947702 | 7249388 | 1495902 | PAX interacting (with transcription-activation domain) protein 1 | Paxip1 | 311944 | 2,23 | down |
| 5989007 | 7249388 | 1495883 | PAX interacting (with transcription-activation domain) protein 1 | Paxip1 | 311944 | 1,51 | up   |
| 6007140 | 7249388 | 1495903 | PAX interacting (with transcription-activation domain) protein 1 | Paxip1 | 311944 | 1,11 | up   |
| 6007971 | 7249388 | 1495908 | PAX interacting (with transcription-activation domain) protein 1 | Paxip1 | 311944 | 1,15 | up   |
| 6020841 | 7249388 | 1495889 | PAX interacting (with transcription-activation domain) protein 1 | Paxip1 | 311944 | 1,06 | up   |
| 6104945 | 7249388 | 1495886 | PAX interacting (with transcription-activation domain) protein 1 | Paxip1 | 311944 | 1,11 | down |
| 6130208 | 7249388 | 1495891 | PAX interacting (with transcription-activation domain) protein 1 | Paxip1 | 311944 | 1,55 | down |
| 6141195 | 7249388 | 1495905 | PAX interacting (with transcription-activation domain) protein 1 | Paxip1 | 311944 | 1,31 | down |
| 6160204 | 7249388 | 1495904 | PAX interacting (with transcription-activation domain) protein 1 | Paxip1 | 311944 | 1,02 | up   |
| 6171551 | 7249388 | 1495889 | PAX interacting (with transcription-activation domain) protein 1 | Paxip1 | 311944 | 1,13 | up   |
| 6208103 | 7249388 | 1495898 | PAX interacting (with transcription-activation domain) protein 1 | Paxip1 | 311944 | 1,12 | down |
| 6281294 | 7249388 | 1495900 | PAX interacting (with transcription-activation domain) protein 1 | Paxip1 | 311944 | 1,02 | up   |
| 6288520 | 7249388 | 1495889 | PAX interacting (with transcription-activation domain) protein 1 | Paxip1 | 311944 | 1,16 | up   |
| 6317784 | 7249388 | 1495896 | PAX interacting (with transcription-activation domain) protein 1 | Paxip1 | 311944 | 1,04 | down |
| 6325958 | 7249388 | 1495895 | PAX interacting (with transcription-activation domain) protein 1 | Paxip1 | 311944 | 1,11 | down |
| 6345433 | 7249388 | 1495901 | PAX interacting (with transcription-activation domain) protein 1 | Paxip1 | 311944 | 1,03 | down |
| 6368076 | 7249388 | 1495889 | PAX interacting (with transcription-activation domain) protein 1 | Paxip1 | 311944 | 1,16 | down |
| 6450246 | 7249388 | 1495888 | PAX interacting (with transcription-activation domain) protein 1 | Paxip1 | 311944 | 1,20 | up   |
| 6485737 | 7249388 | 1495906 | PAX interacting (with transcription-activation domain) protein 1 | Paxip1 | 311944 | 1,11 | down |
| 6603896 | 7249388 | 1495894 | PAX interacting (with transcription-activation domain) protein 1 | Paxip1 | 311944 | 1,21 | up   |
| 6686584 | 7249388 | 1495892 | PAX interacting (with transcription-activation domain) protein 1 | Paxip1 | 311944 | 1,17 | up   |
| 6719482 | 7249388 | 1495889 | PAX interacting (with transcription-activation domain) protein 1 | Paxip1 | 311944 | 1,19 | down |
| 6738166 | 7249388 | 1495891 | PAX interacting (with transcription-activation domain) protein 1 | Paxip1 | 311944 | 1,28 | down |
| 5717794 | 7288108 | 1592120 | PC4 and SFRS1 interacting protein 1                              | Psip1  | 313323 | 2,40 | down |
| 5734818 | 7288108 | 1592116 | PC4 and SFRS1 interacting protein 1                              | Psip1  | 313323 | 1,20 | down |
| 5754921 | 7288108 | 1592126 | PC4 and SFRS1 interacting protein 1                              | Psip1  | 313323 | 1,01 | down |
| 5777959 | 7288108 | 1592121 | PC4 and SFRS1 interacting protein 1                              | Psip1  | 313323 | 1,26 | up   |
| 5806125 | 7288108 | 1592129 | PC4 and SFRS1 interacting protein 1                              | Psip1  | 313323 | 1,06 | down |
| 5812807 | 7288108 | 1592125 | PC4 and SFRS1 interacting protein 1                              | Psip1  | 313323 | 1,10 | down |
| 5839574 | 7288108 | 1592112 | PC4 and SFRS1 interacting protein 1                              | Psip1  | 313323 | 1,03 | up   |
| 5997678 | 7288108 | 1592128 | PC4 and SFRS1 interacting protein 1                              | Psip1  | 313323 | 1,13 | up   |
| 6036811 | 7288108 | 1592122 | PC4 and SFRS1 interacting protein 1                              | Psip1  | 313323 | 1,28 | down |
| 6167304 | 7288108 | 1592118 | PC4 and SFRS1 interacting protein 1                              | Psip1  | 313323 | 1,60 | down |
| 6171365 | 7288108 | 1592123 | PC4 and SFRS1 interacting protein 1                              | Psip1  | 313323 | 1,04 | down |
| 6242202 | 7288108 | 1592115 | PC4 and SFRS1 interacting protein 1                              | Psip1  | 313323 | 1,02 | up   |
| 6285963 | 7288108 | 1592129 | PC4 and SFRS1 interacting protein 1                              | Psip1  | 313323 | 1,14 | up   |
| 6303412 | 7288108 | 1592113 | PC4 and SFRS1 interacting protein 1                              | Psip1  | 313323 | 1,34 | down |
| 6345268 | 7288108 | 1592124 | PC4 and SFRS1 interacting protein 1                              | Psip1  | 313323 | 1,27 | up   |
| 6352507 | 7288108 | 1592117 | PC4 and SFRS1 interacting protein 1                              | Psip1  | 313323 | 1,16 | up   |
| 6366747 | 7288108 | 1592114 | PC4 and SFRS1 interacting protein 1                              | Psip1  | 313323 | 1,38 | down |
| 6456821 | 7288108 | 1592119 | PC4 and SFRS1 interacting protein 1                              | Psip1  | 313323 | 1,32 | up   |
| 6494970 | 7288108 | 1592121 | PC4 and SFRS1 interacting protein 1                              | Psip1  | 313323 | 1,10 | down |
| 6689009 | 7288108 | 1592119 | PC4 and SFRS1 interacting protein 1                              | Psip1  | 313323 | 1,27 | down |
| 6707990 | 7288108 | 1592127 | PC4 and SFRS1 interacting protein 1                              | Psip1  | 313323 | 1,12 | up   |
| 5686329 | 7205216 | 1387725 | PDZ domain containing 2                                          | Pdzd2  | 65034  | 1,02 | down |
| 5699619 | 7205216 | 1387716 | PDZ domain containing 2                                          | Pdzd2  | 65034  | 1,13 | up   |
| 5747868 | 7205216 | 1387729 | PDZ domain containing 2                                          | Pdzd2  | 65034  | 1,19 | down |
| 5768497 | 7205216 | 1387720 | PDZ domain containing 2                                          | Pdzd2  | 65034  | 1,02 | down |
| 5812167 | 7205216 | 1387732 | PDZ domain containing 2                                          | Pdzd2  | 65034  | 1,08 | down |
| 5855873 | 7205216 | 1387733 | PDZ domain containing 2                                          | Pdzd2  | 65034  | 1,29 | down |
| 5903768 | 7205216 | 1387734 | PDZ domain containing 2                                          | Pdzd2  | 65034  | 1,24 | up   |
| 5922145 | 7205216 | 1387728 | PDZ domain containing 2                                          | Pdzd2  | 65034  | 1,44 | down |
| 6018492 | 7205216 | 1387736 | PDZ domain containing 2                                          | Pdzd2  | 65034  | 1,18 | up   |

|         |         |         |                                     |       |        |      |      |
|---------|---------|---------|-------------------------------------|-------|--------|------|------|
| 6076570 | 7205216 | 1387719 | PDZ domain containing 2             | Pdzd2 | 65034  | 1,23 | down |
| 6095462 | 7205216 | 1387723 | PDZ domain containing 2             | Pdzd2 | 65034  | 1,09 | down |
| 6096748 | 7205216 | 1387736 | PDZ domain containing 2             | Pdzd2 | 65034  | 1,09 | down |
| 6203045 | 7205216 | 1387715 | PDZ domain containing 2             | Pdzd2 | 65034  | 3,36 | up   |
| 6205677 | 7205216 | 1387727 | PDZ domain containing 2             | Pdzd2 | 65034  | 1,11 | up   |
| 6245281 | 7205216 | 1387730 | PDZ domain containing 2             | Pdzd2 | 65034  | 1,19 | up   |
| 6302536 | 7205216 | 1387720 | PDZ domain containing 2             | Pdzd2 | 65034  | 1,02 | up   |
| 6341925 | 7205216 | 1387720 | PDZ domain containing 2             | Pdzd2 | 65034  | 1,05 | down |
| 6410204 | 7205216 | 1387722 | PDZ domain containing 2             | Pdzd2 | 65034  | 1,13 | up   |
| 6441758 | 7205216 | 1387735 | PDZ domain containing 2             | Pdzd2 | 65034  | 1,06 | down |
| 6453773 | 7205216 | 1387720 | PDZ domain containing 2             | Pdzd2 | 65034  | 1,34 | down |
| 6526776 | 7205216 | 1387722 | PDZ domain containing 2             | Pdzd2 | 65034  | 1,90 | down |
| 6531129 | 7205216 | 1387718 | PDZ domain containing 2             | Pdzd2 | 65034  | 1,03 | up   |
| 6580938 | 7205216 | 1387717 | PDZ domain containing 2             | Pdzd2 | 65034  | 2,16 | down |
| 6637593 | 7205216 | 1387722 | PDZ domain containing 2             | Pdzd2 | 65034  | 1,04 | up   |
| 6649124 | 7205216 | 1387724 | PDZ domain containing 2             | Pdzd2 | 65034  | 1,28 | up   |
| 6649846 | 7205216 | 1387720 | PDZ domain containing 2             | Pdzd2 | 65034  | 1,10 | up   |
| 6656462 | 7205216 | 1387731 | PDZ domain containing 2             | Pdzd2 | 65034  | 1,16 | up   |
| 6746258 | 7205216 | 1387726 | PDZ domain containing 2             | Pdzd2 | 65034  | 1,01 | up   |
| 5923303 | 7344702 | 1732139 | PDZ domain containing 3             | Pdzd3 | 500986 | 1,02 | up   |
| 5759705 | 7267953 | 1542229 | PDZ domain containing RING finger 3 | Pdzm3 | 312607 | 1,01 | down |
| 5811369 | 7267953 | 1542229 | PDZ domain containing RING finger 3 | Pdzm3 | 312607 | 1,44 | up   |
| 5826075 | 7267953 | 1542264 | PDZ domain containing RING finger 3 | Pdzm3 | 312607 | 1,06 | up   |
| 5908971 | 7267953 | 1542229 | PDZ domain containing RING finger 3 | Pdzm3 | 312607 | 1,26 | down |
| 5633848 | 7131119 | 1204429 | pellino 2                           | Peli2 | 305835 | 1,05 | up   |
| 5652064 | 7131119 | 1204455 | pellino 2                           | Peli2 | 305835 | 1,63 | up   |
| 5657616 | 7131119 | 1204428 | pellino 2                           | Peli2 | 305835 | 2,64 | down |
| 5659830 | 7131119 | 1204438 | pellino 2                           | Peli2 | 305835 | 1,04 | up   |
| 6117229 | 7131119 | 1204453 | pellino 2                           | Peli2 | 305835 | 1,22 | up   |
| 6196689 | 7131119 | 1204455 | pellino 2                           | Peli2 | 305835 | 1,03 | up   |
| 6575182 | 7131119 | 1204451 | pellino 2                           | Peli2 | 305835 | 1,33 | up   |
| 6676085 | 7131119 | 1204454 | pellino 2                           | Peli2 | 305835 | 1,45 | down |
| 5670212 | 7265952 | 1536996 | Pentatricopeptide repeat domain 3   | Ptcd3 | 500199 | 2,01 | down |
| 5702861 | 7265952 | 1536984 | Pentatricopeptide repeat domain 3   | Ptcd3 | 500199 | 1,28 | up   |
| 5716060 | 7265952 | 1536987 | Pentatricopeptide repeat domain 3   | Ptcd3 | 500199 | 1,16 | down |
| 5727377 | 7265952 | 1536988 | Pentatricopeptide repeat domain 3   | Ptcd3 | 500199 | 1,37 | down |
| 5728425 | 7265952 | 1536978 | Pentatricopeptide repeat domain 3   | Ptcd3 | 500199 | 1,39 | up   |
| 5784032 | 7265952 | 1536976 | Pentatricopeptide repeat domain 3   | Ptcd3 | 500199 | 1,17 | up   |
| 5858348 | 7265952 | 1536983 | Pentatricopeptide repeat domain 3   | Ptcd3 | 500199 | 1,11 | up   |
| 5889526 | 7265952 | 1536975 | Pentatricopeptide repeat domain 3   | Ptcd3 | 500199 | 1,04 | down |
| 5907122 | 7265952 | 1536977 | Pentatricopeptide repeat domain 3   | Ptcd3 | 500199 | 1,40 | down |
| 5954779 | 7265952 | 1536997 | Pentatricopeptide repeat domain 3   | Ptcd3 | 500199 | 1,38 | down |
| 5962766 | 7265952 | 1536993 | Pentatricopeptide repeat domain 3   | Ptcd3 | 500199 | 1,14 | up   |
| 5980637 | 7265952 | 1536982 | Pentatricopeptide repeat domain 3   | Ptcd3 | 500199 | 1,07 | down |
| 6043100 | 7265952 | 1536984 | Pentatricopeptide repeat domain 3   | Ptcd3 | 500199 | 1,05 | up   |
| 6116600 | 7265952 | 1536995 | Pentatricopeptide repeat domain 3   | Ptcd3 | 500199 | 1,10 | up   |
| 6161450 | 7265952 | 1536981 | Pentatricopeptide repeat domain 3   | Ptcd3 | 500199 | 1,26 | down |
| 6179486 | 7265952 | 1536980 | Pentatricopeptide repeat domain 3   | Ptcd3 | 500199 | 1,07 | down |
| 6199736 | 7265952 | 1536997 | Pentatricopeptide repeat domain 3   | Ptcd3 | 500199 | 1,16 | down |
| 6210875 | 7265952 | 1536990 | Pentatricopeptide repeat domain 3   | Ptcd3 | 500199 | 1,03 | down |
| 6211131 | 7265952 | 1536992 | Pentatricopeptide repeat domain 3   | Ptcd3 | 500199 | 1,24 | up   |
| 6225268 | 7265952 | 1536979 | Pentatricopeptide repeat domain 3   | Ptcd3 | 500199 | 1,27 | up   |
| 6381352 | 7265952 | 1536972 | Pentatricopeptide repeat domain 3   | Ptcd3 | 500199 | 1,04 | up   |
| 6391257 | 7265952 | 1536985 | Pentatricopeptide repeat domain 3   | Ptcd3 | 500199 | 1,17 | down |
| 6433101 | 7265952 | 1536991 | Pentatricopeptide repeat domain 3   | Ptcd3 | 500199 | 1,22 | up   |
| 6475260 | 7265952 | 1536973 | Pentatricopeptide repeat domain 3   | Ptcd3 | 500199 | 1,65 | down |

|         |         |         |                                               |       |        |      |      |
|---------|---------|---------|-----------------------------------------------|-------|--------|------|------|
| 6522020 | 7265952 | 1536988 | Pentatricopeptide repeat domain 3             | Ptcd3 | 500199 | 1,25 | up   |
| 6540168 | 7265952 | 1536974 | Pentatricopeptide repeat domain 3             | Ptcd3 | 500199 | 1,01 | up   |
| 6611883 | 7265952 | 1536971 | Pentatricopeptide repeat domain 3             | Ptcd3 | 500199 | 1,07 | down |
| 6693989 | 7265952 | 1536971 | Pentatricopeptide repeat domain 3             | Ptcd3 | 500199 | 1,02 | down |
| 5707117 | 7292488 | 1602443 | peptidyl arginine deiminase, type IV          | Padi4 | 29512  | 1,12 | down |
| 5727539 | 7292488 | 1602435 | peptidyl arginine deiminase, type IV          | Padi4 | 29512  | 1,25 | down |
| 5742273 | 7292488 | 1602434 | peptidyl arginine deiminase, type IV          | Padi4 | 29512  | 2,12 | up   |
| 5756324 | 7292488 | 1602442 | peptidyl arginine deiminase, type IV          | Padi4 | 29512  | 1,26 | up   |
| 5774145 | 7292488 | 1602431 | peptidyl arginine deiminase, type IV          | Padi4 | 29512  | 1,17 | down |
| 5790488 | 7292488 | 1602441 | peptidyl arginine deiminase, type IV          | Padi4 | 29512  | 1,40 | down |
| 5824688 | 7292488 | 1602438 | peptidyl arginine deiminase, type IV          | Padi4 | 29512  | 1,00 | up   |
| 5873085 | 7292488 | 1602429 | peptidyl arginine deiminase, type IV          | Padi4 | 29512  | 1,01 | up   |
| 5906807 | 7292488 | 1602428 | peptidyl arginine deiminase, type IV          | Padi4 | 29512  | 1,04 | up   |
| 5950256 | 7292488 | 1602432 | peptidyl arginine deiminase, type IV          | Padi4 | 29512  | 1,93 | up   |
| 6089866 | 7292488 | 1602436 | peptidyl arginine deiminase, type IV          | Padi4 | 29512  | 1,45 | down |
| 6217845 | 7292488 | 1602437 | peptidyl arginine deiminase, type IV          | Padi4 | 29512  | 2,09 | down |
| 6506622 | 7292488 | 1602439 | peptidyl arginine deiminase, type IV          | Padi4 | 29512  | 1,01 | down |
| 6547647 | 7292488 | 1602433 | peptidyl arginine deiminase, type IV          | Padi4 | 29512  | 1,10 | up   |
| 6551620 | 7292488 | 1602427 | peptidyl arginine deiminase, type IV          | Padi4 | 29512  | 1,01 | down |
| 6679323 | 7292488 | 1602430 | peptidyl arginine deiminase, type IV          | Padi4 | 29512  | 1,47 | down |
| 6732922 | 7292488 | 1602440 | peptidyl arginine deiminase, type IV          | Padi4 | 29512  | 1,13 | down |
| 6746656 | 7292488 | 1602433 | peptidyl arginine deiminase, type IV          | Padi4 | 29512  | 1,10 | down |
| 5792739 | 7371483 | 1800146 | peptidylprolyl isomerase (cyclophilin)-like 2 | Ppil2 | 360746 | 1,20 | down |
| 5690665 | 7362531 | 1775642 | peptidylprolyl isomerase (cyclophilin)-like 3 | Ppil3 | 301432 | 1,35 | down |
| 5961016 | 7362531 | 1775646 | peptidylprolyl isomerase (cyclophilin)-like 3 | Ppil3 | 301432 | 1,19 | up   |
| 6037731 | 7362531 | 1775640 | peptidylprolyl isomerase (cyclophilin)-like 3 | Ppil3 | 301432 | 1,13 | up   |
| 6460854 | 7362531 | 1775641 | peptidylprolyl isomerase (cyclophilin)-like 3 | Ppil3 | 301432 | 1,33 | down |
| 6474007 | 7362531 | 1775643 | peptidylprolyl isomerase (cyclophilin)-like 3 | Ppil3 | 301432 | 1,28 | up   |
| 6520639 | 7362531 | 1775639 | peptidylprolyl isomerase (cyclophilin)-like 3 | Ppil3 | 301432 | 1,01 | up   |
| 6546791 | 7362531 | 1775644 | peptidylprolyl isomerase (cyclophilin)-like 3 | Ppil3 | 301432 | 2,09 | up   |
| 6596728 | 7362531 | 1775640 | peptidylprolyl isomerase (cyclophilin)-like 3 | Ppil3 | 301432 | 1,16 | up   |
| 6653169 | 7362531 | 1775645 | peptidylprolyl isomerase (cyclophilin)-like 3 | Ppil3 | 301432 | 1,47 | up   |
| 5674138 | 7290793 | 1598641 | peptidylprolyl isomerase E (cyclophilin E)    | Ppie  | 298508 | 1,67 | down |
| 5743174 | 7290793 | 1598631 | peptidylprolyl isomerase E (cyclophilin E)    | Ppie  | 298508 | 1,15 | down |
| 5789469 | 7290793 | 1598635 | peptidylprolyl isomerase E (cyclophilin E)    | Ppie  | 298508 | 1,53 | down |
| 5812771 | 7290793 | 1598637 | peptidylprolyl isomerase E (cyclophilin E)    | Ppie  | 298508 | 2,15 | up   |
| 5846550 | 7290793 | 1598628 | peptidylprolyl isomerase E (cyclophilin E)    | Ppie  | 298508 | 1,79 | down |
| 5997584 | 7290793 | 1598636 | peptidylprolyl isomerase E (cyclophilin E)    | Ppie  | 298508 | 1,09 | up   |
| 6021767 | 7290793 | 1598627 | peptidylprolyl isomerase E (cyclophilin E)    | Ppie  | 298508 | 1,05 | down |
| 6114783 | 7290793 | 1598638 | peptidylprolyl isomerase E (cyclophilin E)    | Ppie  | 298508 | 1,24 | down |
| 6308406 | 7290793 | 1598640 | peptidylprolyl isomerase E (cyclophilin E)    | Ppie  | 298508 | 1,09 | down |
| 6419659 | 7290793 | 1598639 | peptidylprolyl isomerase E (cyclophilin E)    | Ppie  | 298508 | 1,35 | up   |
| 6419843 | 7290793 | 1598634 | peptidylprolyl isomerase E (cyclophilin E)    | Ppie  | 298508 | 1,29 | up   |
| 6541888 | 7290793 | 1598633 | peptidylprolyl isomerase E (cyclophilin E)    | Ppie  | 298508 | 1,04 | down |
| 5653740 | 7293385 | 1604646 | period homolog 3 (Drosophila)                 | Per3  | 78962  | 1,88 | down |
| 5671251 | 7293385 | 1604644 | period homolog 3 (Drosophila)                 | Per3  | 78962  | 1,41 | up   |
| 5711795 | 7293385 | 1604654 | period homolog 3 (Drosophila)                 | Per3  | 78962  | 1,69 | down |
| 5739241 | 7293385 | 1604649 | period homolog 3 (Drosophila)                 | Per3  | 78962  | 1,47 | up   |
| 5741944 | 7293385 | 1604647 | period homolog 3 (Drosophila)                 | Per3  | 78962  | 1,98 | down |
| 5784134 | 7293385 | 1604659 | period homolog 3 (Drosophila)                 | Per3  | 78962  | 1,14 | up   |
| 5866159 | 7293385 | 1604651 | period homolog 3 (Drosophila)                 | Per3  | 78962  | 1,46 | down |
| 5931199 | 7293385 | 1604643 | period homolog 3 (Drosophila)                 | Per3  | 78962  | 1,67 | up   |
| 5934652 | 7293385 | 1604644 | period homolog 3 (Drosophila)                 | Per3  | 78962  | 2,03 | down |
| 5951808 | 7293385 | 1604640 | period homolog 3 (Drosophila)                 | Per3  | 78962  | 1,12 | down |
| 5979038 | 7293385 | 1604652 | period homolog 3 (Drosophila)                 | Per3  | 78962  | 1,05 | down |
| 6021486 | 7293385 | 1604645 | period homolog 3 (Drosophila)                 | Per3  | 78962  | 1,35 | down |

|         |         |         |                                                                       |           |        |      |      |
|---------|---------|---------|-----------------------------------------------------------------------|-----------|--------|------|------|
| 6032121 | 7293385 | 1604650 | period homolog 3 (Drosophila)                                         | Per3      | 78962  | 1,10 | up   |
| 6110176 | 7293385 | 1604660 | period homolog 3 (Drosophila)                                         | Per3      | 78962  | 1,12 | up   |
| 6163680 | 7293385 | 1604656 | period homolog 3 (Drosophila)                                         | Per3      | 78962  | 1,41 | up   |
| 6272465 | 7293385 | 1604653 | period homolog 3 (Drosophila)                                         | Per3      | 78962  | 1,04 | up   |
| 6288786 | 7293385 | 1604646 | period homolog 3 (Drosophila)                                         | Per3      | 78962  | 1,35 | down |
| 6295215 | 7293385 | 1604645 | period homolog 3 (Drosophila)                                         | Per3      | 78962  | 1,25 | down |
| 6323758 | 7293385 | 1604657 | period homolog 3 (Drosophila)                                         | Per3      | 78962  | 1,24 | up   |
| 6334224 | 7293385 | 1604655 | period homolog 3 (Drosophila)                                         | Per3      | 78962  | 1,04 | down |
| 6430352 | 7293385 | 1604648 | period homolog 3 (Drosophila)                                         | Per3      | 78962  | 1,10 | down |
| 6480290 | 7293385 | 1604647 | period homolog 3 (Drosophila)                                         | Per3      | 78962  | 1,25 | up   |
| 6494027 | 7293385 | 1604644 | period homolog 3 (Drosophila)                                         | Per3      | 78962  | 1,05 | up   |
| 6551611 | 7293385 | 1604641 | period homolog 3 (Drosophila)                                         | Per3      | 78962  | 1,23 | down |
| 6665480 | 7293385 | 1604646 | period homolog 3 (Drosophila)                                         | Per3      | 78962  | 1,30 | down |
| 6697550 | 7293385 | 1604658 | period homolog 3 (Drosophila)                                         | Per3      | 78962  | 1,35 | down |
| 6704687 | 7293385 | 1604641 | period homolog 3 (Drosophila)                                         | Per3      | 78962  | 1,65 | down |
| 6707581 | 7293385 | 1604642 | period homolog 3 (Drosophila)                                         | Per3      | 78962  | 1,03 | down |
| 6743949 | 7293385 | 1604646 | period homolog 3 (Drosophila)                                         | Per3      | 78962  | 1,20 | down |
| 5670477 | 7065115 | 1044174 | periplakin                                                            | Ppl       | 302934 | 1,90 | up   |
| 5675283 | 7065115 | 1044171 | periplakin                                                            | Ppl       | 302934 | 1,33 | up   |
| 5694573 | 7065115 | 1044164 | periplakin                                                            | Ppl       | 302934 | 2,18 | up   |
| 5730668 | 7065115 | 1044175 | periplakin                                                            | Ppl       | 302934 | 1,14 | down |
| 5838487 | 7065115 | 1044165 | periplakin                                                            | Ppl       | 302934 | 1,20 | up   |
| 5847796 | 7065115 | 1044181 | periplakin                                                            | Ppl       | 302934 | 1,02 | up   |
| 5859365 | 7065115 | 1044170 | periplakin                                                            | Ppl       | 302934 | 1,14 | down |
| 5890189 | 7065115 | 1044166 | periplakin                                                            | Ppl       | 302934 | 1,70 | up   |
| 5904021 | 7065115 | 1044179 | periplakin                                                            | Ppl       | 302934 | 1,32 | down |
| 5952874 | 7065115 | 1044172 | periplakin                                                            | Ppl       | 302934 | 1,59 | up   |
| 5967963 | 7065115 | 1044183 | periplakin                                                            | Ppl       | 302934 | 1,78 | up   |
| 6013122 | 7065115 | 1044184 | periplakin                                                            | Ppl       | 302934 | 1,07 | up   |
| 6042676 | 7065115 | 1044182 | periplakin                                                            | Ppl       | 302934 | 1,60 | down |
| 6109497 | 7065115 | 1044169 | periplakin                                                            | Ppl       | 302934 | 1,16 | up   |
| 6111446 | 7065115 | 1044177 | periplakin                                                            | Ppl       | 302934 | 1,24 | down |
| 6199442 | 7065115 | 1044176 | periplakin                                                            | Ppl       | 302934 | 1,33 | down |
| 6200974 | 7065115 | 1044158 | periplakin                                                            | Ppl       | 302934 | 1,31 | down |
| 6333774 | 7065115 | 1044180 | periplakin                                                            | Ppl       | 302934 | 1,39 | down |
| 6577493 | 7065115 | 1044167 | periplakin                                                            | Ppl       | 302934 | 1,14 | up   |
| 6631339 | 7065115 | 1044168 | periplakin                                                            | Ppl       | 302934 | 1,04 | down |
| 6663177 | 7065115 | 1044158 | periplakin                                                            | Ppl       | 302934 | 1,71 | up   |
| 6686156 | 7065115 | 1044173 | periplakin                                                            | Ppl       | 302934 | 1,13 | up   |
| 6716688 | 7065115 | 1044163 | periplakin                                                            | Ppl       | 302934 | 1,16 | up   |
| 6745922 | 7065115 | 1044184 | periplakin                                                            | Ppl       | 302934 | 1,14 | down |
| 5726039 | 7280743 | 1574566 | perlecan                                                              | LOC313641 | 313641 | 1,09 | down |
| 5963374 | 7280743 | 1574565 | perlecan                                                              | LOC313641 | 313641 | 1,05 | up   |
| 6233081 | 7280743 | 1574564 | perlecan                                                              | LOC313641 | 313641 | 1,45 | up   |
| 5629447 | 7044633 | 997361  | peroxisomal biogenesis factor 7                                       | Pex7      | 308718 | 1,39 | down |
| 5726891 | 7044633 | 997358  | peroxisomal biogenesis factor 7                                       | Pex7      | 308718 | 1,22 | down |
| 5733497 | 7044633 | 997357  | peroxisomal biogenesis factor 7                                       | Pex7      | 308718 | 1,20 | down |
| 5857756 | 7044633 | 997352  | peroxisomal biogenesis factor 7                                       | Pex7      | 308718 | 1,28 | down |
| 5936239 | 7044633 | 997353  | peroxisomal biogenesis factor 7                                       | Pex7      | 308718 | 1,34 | up   |
| 6085894 | 7044633 | 997352  | peroxisomal biogenesis factor 7                                       | Pex7      | 308718 | 1,08 | up   |
| 6143360 | 7044633 | 997367  | peroxisomal biogenesis factor 7                                       | Pex7      | 308718 | 1,33 | up   |
| 6563347 | 7044633 | 997365  | peroxisomal biogenesis factor 7                                       | Pex7      | 308718 | 2,04 | down |
| 6568641 | 7044633 | 997366  | peroxisomal biogenesis factor 7                                       | Pex7      | 308718 | 1,02 | down |
| 6584155 | 7044633 | 997355  | peroxisomal biogenesis factor 7                                       | Pex7      | 308718 | 1,10 | down |
| 6651600 | 7044633 | 997362  | peroxisomal biogenesis factor 7                                       | Pex7      | 308718 | 1,17 | down |
| 5865233 | 7248964 | 1494937 | peroxisomal proliferator-activated receptor A interacting complex 285 | Pric285   | 296474 | 1,22 | up   |



|         |         |         |                                                                       |         |        |      |      |
|---------|---------|---------|-----------------------------------------------------------------------|---------|--------|------|------|
| 6091986 | 7248964 | 1494937 | peroxisomal proliferator-activated receptor A interacting complex 285 | Pric285 | 296474 | 1,12 | up   |
| 6124619 | 7248964 | 1494937 | peroxisomal proliferator-activated receptor A interacting complex 285 | Pric285 | 296474 | 1,35 | down |
| 6500936 | 7248964 | 1494937 | peroxisomal proliferator-activated receptor A interacting complex 285 | Pric285 | 296474 | 1,20 | up   |
| 5728096 | 7319557 | 1671134 | peroxisome proliferator activated receptor alpha                      | Ppara   | 25747  | 1,08 | up   |
| 5874066 | 7319557 | 1671136 | peroxisome proliferator activated receptor alpha                      | Ppara   | 25747  | 2,07 | down |
| 6196994 | 7319557 | 1671139 | peroxisome proliferator activated receptor alpha                      | Ppara   | 25747  | 1,13 | down |
| 6200041 | 7319557 | 1671135 | peroxisome proliferator activated receptor alpha                      | Ppara   | 25747  | 1,11 | up   |
| 6329064 | 7319557 | 1671135 | peroxisome proliferator activated receptor alpha                      | Ppara   | 25747  | 1,52 | up   |
| 6362897 | 7319557 | 1671137 | peroxisome proliferator activated receptor alpha                      | Ppara   | 25747  | 1,10 | up   |
| 6611909 | 7319557 | 1671140 | peroxisome proliferator activated receptor alpha                      | Ppara   | 25747  | 1,01 | up   |
| 6616107 | 7319557 | 1671138 | peroxisome proliferator activated receptor alpha                      | Ppara   | 25747  | 1,82 | down |
| 5649130 | 7103829 | 1137208 | PH domain and leucine rich repeat protein phosphatase                 | Phlpp   | 59265  | 1,21 | down |
| 5760359 | 7103829 | 1137208 | PH domain and leucine rich repeat protein phosphatase                 | Phlpp   | 59265  | 1,44 | down |
| 5761574 | 7103829 | 1137192 | PH domain and leucine rich repeat protein phosphatase                 | Phlpp   | 59265  | 1,08 | down |
| 5767272 | 7103829 | 1137192 | PH domain and leucine rich repeat protein phosphatase                 | Phlpp   | 59265  | 6,06 | down |
| 5839523 | 7103829 | 1137198 | PH domain and leucine rich repeat protein phosphatase                 | Phlpp   | 59265  | 1,11 | up   |
| 5841825 | 7103829 | 1137200 | PH domain and leucine rich repeat protein phosphatase                 | Phlpp   | 59265  | 1,03 | down |
| 5899958 | 7103829 | 1137195 | PH domain and leucine rich repeat protein phosphatase                 | Phlpp   | 59265  | 1,02 | up   |
| 5948299 | 7103829 | 1137208 | PH domain and leucine rich repeat protein phosphatase                 | Phlpp   | 59265  | 1,11 | up   |
| 6046143 | 7103829 | 1137194 | PH domain and leucine rich repeat protein phosphatase                 | Phlpp   | 59265  | 1,14 | up   |
| 6079068 | 7103829 | 1137207 | PH domain and leucine rich repeat protein phosphatase                 | Phlpp   | 59265  | 1,16 | down |
| 6139321 | 7103829 | 1137197 | PH domain and leucine rich repeat protein phosphatase                 | Phlpp   | 59265  | 1,06 | up   |
| 6143772 | 7103829 | 1137206 | PH domain and leucine rich repeat protein phosphatase                 | Phlpp   | 59265  | 1,14 | up   |
| 6155769 | 7103829 | 1137203 | PH domain and leucine rich repeat protein phosphatase                 | Phlpp   | 59265  | 1,02 | up   |
| 6211209 | 7103829 | 1137208 | PH domain and leucine rich repeat protein phosphatase                 | Phlpp   | 59265  | 1,06 | up   |
| 6233725 | 7103829 | 1137192 | PH domain and leucine rich repeat protein phosphatase                 | Phlpp   | 59265  | 1,35 | down |
| 6311321 | 7103829 | 1137196 | PH domain and leucine rich repeat protein phosphatase                 | Phlpp   | 59265  | 1,20 | up   |
| 6326828 | 7103829 | 1137205 | PH domain and leucine rich repeat protein phosphatase                 | Phlpp   | 59265  | 1,01 | up   |
| 6372434 | 7103829 | 1137202 | PH domain and leucine rich repeat protein phosphatase                 | Phlpp   | 59265  | 1,00 | down |
| 6376837 | 7103829 | 1137199 | PH domain and leucine rich repeat protein phosphatase                 | Phlpp   | 59265  | 1,08 | up   |
| 6397146 | 7103829 | 1137192 | PH domain and leucine rich repeat protein phosphatase                 | Phlpp   | 59265  | 1,85 | down |
| 6451157 | 7103829 | 1137208 | PH domain and leucine rich repeat protein phosphatase                 | Phlpp   | 59265  | 1,17 | down |
| 6556856 | 7103829 | 1137192 | PH domain and leucine rich repeat protein phosphatase                 | Phlpp   | 59265  | 1,43 | up   |
| 6596318 | 7103829 | 1137204 | PH domain and leucine rich repeat protein phosphatase                 | Phlpp   | 59265  | 1,21 | down |
| 6600396 | 7103829 | 1137193 | PH domain and leucine rich repeat protein phosphatase                 | Phlpp   | 59265  | 1,43 | up   |
| 6670232 | 7103829 | 1137201 | PH domain and leucine rich repeat protein phosphatase                 | Phlpp   | 59265  | 1,10 | up   |
| 6718892 | 7103829 | 1137192 | PH domain and leucine rich repeat protein phosphatase                 | Phlpp   | 59265  | 1,83 | down |
| 6726168 | 7103829 | 1137204 | PH domain and leucine rich repeat protein phosphatase                 | Phlpp   | 59265  | 1,05 | up   |
| 6742819 | 7103829 | 1137192 | PH domain and leucine rich repeat protein phosphatase                 | Phlpp   | 59265  | 1,37 | down |
| 5724030 | 7180949 | 1327482 | PH domain and leucine rich repeat protein phosphatase-like            | Phlpp1  | 498949 | 1,25 | up   |
| 5848670 | 7180949 | 1327496 | PH domain and leucine rich repeat protein phosphatase-like            | Phlpp1  | 498949 | 1,03 | up   |
| 5967255 | 7180949 | 1327483 | PH domain and leucine rich repeat protein phosphatase-like            | Phlpp1  | 498949 | 1,21 | down |
| 5970904 | 7180949 | 1327497 | PH domain and leucine rich repeat protein phosphatase-like            | Phlpp1  | 498949 | 1,08 | up   |
| 5999354 | 7180949 | 1327480 | PH domain and leucine rich repeat protein phosphatase-like            | Phlpp1  | 498949 | 1,35 | down |
| 6070806 | 7180949 | 1327490 | PH domain and leucine rich repeat protein phosphatase-like            | Phlpp1  | 498949 | 1,04 | up   |
| 6075545 | 7180949 | 1327493 | PH domain and leucine rich repeat protein phosphatase-like            | Phlpp1  | 498949 | 1,04 | up   |
| 6084929 | 7180949 | 1327479 | PH domain and leucine rich repeat protein phosphatase-like            | Phlpp1  | 498949 | 1,10 | up   |
| 6236088 | 7180949 | 1327477 | PH domain and leucine rich repeat protein phosphatase-like            | Phlpp1  | 498949 | 2,04 | down |
| 6249957 | 7180949 | 1327496 | PH domain and leucine rich repeat protein phosphatase-like            | Phlpp1  | 498949 | 1,12 | up   |
| 6266363 | 7180949 | 1327494 | PH domain and leucine rich repeat protein phosphatase-like            | Phlpp1  | 498949 | 1,82 | up   |
| 6276210 | 7180949 | 1327479 | PH domain and leucine rich repeat protein phosphatase-like            | Phlpp1  | 498949 | 1,21 | up   |
| 6447749 | 7180949 | 1327491 | PH domain and leucine rich repeat protein phosphatase-like            | Phlpp1  | 498949 | 1,23 | up   |
| 6475997 | 7180949 | 1327477 | PH domain and leucine rich repeat protein phosphatase-like            | Phlpp1  | 498949 | 1,27 | up   |
| 6510572 | 7180949 | 1327489 | PH domain and leucine rich repeat protein phosphatase-like            | Phlpp1  | 498949 | 1,27 | up   |
| 6604474 | 7180949 | 1327485 | PH domain and leucine rich repeat protein phosphatase-like            | Phlpp1  | 498949 | 1,03 | up   |
| 6634957 | 7180949 | 1327488 | PH domain and leucine rich repeat protein phosphatase-like            | Phlpp1  | 498949 | 1,14 | down |

|         |         |         |                                                            |                  |                   |      |      |
|---------|---------|---------|------------------------------------------------------------|------------------|-------------------|------|------|
| 6644000 | 7180949 | 1327481 | PH domain and leucine rich repeat protein phosphatase-like | Phlpp1           | 498949            | 1,15 | down |
| 6679953 | 7180949 | 1327484 | PH domain and leucine rich repeat protein phosphatase-like | Phlpp1           | 498949            | 1,27 | up   |
| 6686525 | 7180949 | 1327475 | PH domain and leucine rich repeat protein phosphatase-like | Phlpp1           | 498949            | 1,08 | up   |
| 6720368 | 7180949 | 1327495 | PH domain and leucine rich repeat protein phosphatase-like | Phlpp1           | 498949            | 1,11 | up   |
| 6743202 | 7180949 | 1327492 | PH domain and leucine rich repeat protein phosphatase-like | Phlpp1           | 498949            | 1,08 | down |
| 5641305 | 7138718 | 1222794 | PHD finger protein 11                                      | Phf11            | 361051            | 1,18 | down |
| 5643169 | 7138718 | 1222790 | PHD finger protein 11                                      | Phf11            | 361051            | 2,30 | up   |
| 5651540 | 7138718 | 1222788 | PHD finger protein 11                                      | Phf11            | 361051            | 1,20 | down |
| 5887174 | 7138718 | 1222789 | PHD finger protein 11                                      | Phf11            | 361051            | 2,22 | down |
| 5989665 | 7138718 | 1222791 | PHD finger protein 11                                      | Phf11            | 361051            | 1,42 | up   |
| 6266565 | 7138718 | 1222786 | PHD finger protein 11                                      | Phf11            | 361051            | 1,10 | down |
| 6294409 | 7138718 | 1222787 | PHD finger protein 11                                      | Phf11            | 361051            | 1,30 | up   |
| 6543912 | 7138718 | 1222792 | PHD finger protein 11                                      | Phf11            | 361051            | 1,76 | up   |
| 5665582 | 7138718 | 1222785 | PHD finger protein 11-like /// PHD finger protein 11       | Phf111 /// Phf11 | 364393 /// 361051 | 4,38 | down |
| 5844291 | 7138718 | 1222793 | PHD finger protein 11-like /// PHD finger protein 11       | Phf111 /// Phf11 | 364393 /// 361051 | 1,04 | up   |
| 6374846 | 7138718 | 1222785 | PHD finger protein 11-like /// PHD finger protein 11       | Phf111 /// Phf11 | 364393 /// 361051 | 1,07 | down |
| 6687308 | 7138718 | 1222788 | PHD finger protein 11-like /// PHD finger protein 11       | Phf111 /// Phf11 | 364393 /// 361051 | 1,87 | down |
| 5629948 | 7193513 | 1359464 | PHD finger protein 17                                      | Phf17            | 310352            | 1,13 | up   |
| 5745532 | 7193513 | 1359467 | PHD finger protein 17                                      | Phf17            | 310352            | 1,95 | up   |
| 5957166 | 7193513 | 1359467 | PHD finger protein 17                                      | Phf17            | 310352            | 1,02 | down |
| 5982397 | 7193513 | 1359463 | PHD finger protein 17                                      | Phf17            | 310352            | 1,09 | up   |
| 5982418 | 7193513 | 1359465 | PHD finger protein 17                                      | Phf17            | 310352            | 1,14 | up   |
| 6083200 | 7193513 | 1359458 | PHD finger protein 17                                      | Phf17            | 310352            | 1,26 | up   |
| 6097345 | 7193513 | 1359471 | PHD finger protein 17                                      | Phf17            | 310352            | 1,01 | up   |
| 6217122 | 7193513 | 1359453 | PHD finger protein 17                                      | Phf17            | 310352            | 1,30 | up   |
| 6337034 | 7193513 | 1359467 | PHD finger protein 17                                      | Phf17            | 310352            | 1,23 | up   |
| 6361597 | 7193513 | 1359460 | PHD finger protein 17                                      | Phf17            | 310352            | 1,21 | up   |
| 6399646 | 7193513 | 1359469 | PHD finger protein 17                                      | Phf17            | 310352            | 1,23 | up   |
| 6412884 | 7193513 | 1359466 | PHD finger protein 17                                      | Phf17            | 310352            | 1,03 | down |
| 6439886 | 7193513 | 1359472 | PHD finger protein 17                                      | Phf17            | 310352            | 1,30 | up   |
| 6565142 | 7193513 | 1359447 | PHD finger protein 17                                      | Phf17            | 310352            | 1,18 | down |
| 6602907 | 7193513 | 1359471 | PHD finger protein 17                                      | Phf17            | 310352            | 1,36 | down |
| 6677181 | 7193513 | 1359467 | PHD finger protein 17                                      | Phf17            | 310352            | 1,06 | down |
| 5622292 | 7313442 | 1655518 | phenylalanine hydroxylase                                  | Pah              | 24616             | 1,38 | down |
| 5636956 | 7313442 | 1655517 | phenylalanine hydroxylase                                  | Pah              | 24616             | 1,15 | up   |
| 5650875 | 7313442 | 1655509 | phenylalanine hydroxylase                                  | Pah              | 24616             | 1,02 | down |
| 5667296 | 7313442 | 1655510 | phenylalanine hydroxylase                                  | Pah              | 24616             | 1,23 | up   |
| 6020309 | 7313442 | 1655521 | phenylalanine hydroxylase                                  | Pah              | 24616             | 1,25 | down |
| 6046395 | 7313442 | 1655519 | phenylalanine hydroxylase                                  | Pah              | 24616             | 1,36 | down |
| 6228727 | 7313442 | 1655511 | phenylalanine hydroxylase                                  | Pah              | 24616             | 1,39 | up   |
| 6423625 | 7313442 | 1655520 | phenylalanine hydroxylase                                  | Pah              | 24616             | 1,09 | up   |
| 6437421 | 7313442 | 1655512 | phenylalanine hydroxylase                                  | Pah              | 24616             | 1,01 | up   |
| 6440126 | 7313442 | 1655513 | phenylalanine hydroxylase                                  | Pah              | 24616             | 2,48 | up   |
| 6462931 | 7313442 | 1655514 | phenylalanine hydroxylase                                  | Pah              | 24616             | 1,10 | up   |
| 6516624 | 7313442 | 1655516 | phenylalanine hydroxylase                                  | Pah              | 24616             | 1,02 | down |
| 6517961 | 7313442 | 1655516 | phenylalanine hydroxylase                                  | Pah              | 24616             | 1,02 | down |
| 6727892 | 7313442 | 1655522 | phenylalanine hydroxylase                                  | Pah              | 24616             | 1,09 | down |
| 6731564 | 7313442 | 1655515 | phenylalanine hydroxylase                                  | Pah              | 24616             | 1,10 | up   |
| 5633204 | 7098801 | 1124630 | phosphatidylethanolamine binding protein 1                 | Pebp1            | 29542             | 1,60 | up   |
| 5743893 | 7098801 | 1124631 | phosphatidylethanolamine binding protein 1                 | Pebp1            | 29542             | 1,16 | down |
| 5848920 | 7098801 | 1124633 | phosphatidylethanolamine binding protein 1                 | Pebp1            | 29542             | 1,01 | down |
| 6084127 | 7098801 | 1124634 | phosphatidylethanolamine binding protein 1                 | Pebp1            | 29542             | 1,02 | down |
| 6587959 | 7098801 | 1124630 | phosphatidylethanolamine binding protein 1                 | Pebp1            | 29542             | 6,03 | down |
| 6645010 | 7098801 | 1124632 | phosphatidylethanolamine binding protein 1                 | Pebp1            | 29542             | 1,60 | down |
| 5628724 | 7293234 | 1604343 | phosphatidylinositol 3-kinase catalytic delta polypeptide  | Pik3cd           | 366508            | 1,06 | up   |
| 5696066 | 7293234 | 1604345 | phosphatidylinositol 3-kinase catalytic delta polypeptide  | Pik3cd           | 366508            | 1,12 | up   |

|         |         |         |                                                           |        |        |      |      |
|---------|---------|---------|-----------------------------------------------------------|--------|--------|------|------|
| 5706737 | 7293234 | 1604333 | phosphatidylinositol 3-kinase catalytic delta polypeptide | Pik3cd | 366508 | 1,23 | up   |
| 5745684 | 7293234 | 1604345 | phosphatidylinositol 3-kinase catalytic delta polypeptide | Pik3cd | 366508 | 1,81 | up   |
| 5772144 | 7293234 | 1604325 | phosphatidylinositol 3-kinase catalytic delta polypeptide | Pik3cd | 366508 | 1,04 | down |
| 5775398 | 7293234 | 1604345 | phosphatidylinositol 3-kinase catalytic delta polypeptide | Pik3cd | 366508 | 1,57 | down |
| 5891886 | 7293234 | 1604328 | phosphatidylinositol 3-kinase catalytic delta polypeptide | Pik3cd | 366508 | 1,40 | down |
| 5938306 | 7293234 | 1604324 | phosphatidylinositol 3-kinase catalytic delta polypeptide | Pik3cd | 366508 | 1,18 | up   |
| 5978814 | 7293234 | 1604338 | phosphatidylinositol 3-kinase catalytic delta polypeptide | Pik3cd | 366508 | 1,22 | down |
| 5984688 | 7293234 | 1604327 | phosphatidylinositol 3-kinase catalytic delta polypeptide | Pik3cd | 366508 | 1,04 | up   |
| 6000474 | 7293234 | 1604341 | phosphatidylinositol 3-kinase catalytic delta polypeptide | Pik3cd | 366508 | 1,10 | up   |
| 6068552 | 7293234 | 1604339 | phosphatidylinositol 3-kinase catalytic delta polypeptide | Pik3cd | 366508 | 1,05 | up   |
| 6122624 | 7293234 | 1604327 | phosphatidylinositol 3-kinase catalytic delta polypeptide | Pik3cd | 366508 | 1,30 | up   |
| 6139864 | 7293234 | 1604347 | phosphatidylinositol 3-kinase catalytic delta polypeptide | Pik3cd | 366508 | 1,75 | up   |
| 6196703 | 7293234 | 1604337 | phosphatidylinositol 3-kinase catalytic delta polypeptide | Pik3cd | 366508 | 1,00 | down |
| 6201710 | 7293234 | 1604340 | phosphatidylinositol 3-kinase catalytic delta polypeptide | Pik3cd | 366508 | 1,11 | up   |
| 6225695 | 7293234 | 1604347 | phosphatidylinositol 3-kinase catalytic delta polypeptide | Pik3cd | 366508 | 1,47 | down |
| 6232806 | 7293234 | 1604331 | phosphatidylinositol 3-kinase catalytic delta polypeptide | Pik3cd | 366508 | 1,03 | up   |
| 6260484 | 7293234 | 1604346 | phosphatidylinositol 3-kinase catalytic delta polypeptide | Pik3cd | 366508 | 1,11 | up   |
| 6306317 | 7293234 | 1604344 | phosphatidylinositol 3-kinase catalytic delta polypeptide | Pik3cd | 366508 | 1,41 | up   |
| 6310607 | 7293234 | 1604332 | phosphatidylinositol 3-kinase catalytic delta polypeptide | Pik3cd | 366508 | 1,22 | down |
| 6448351 | 7293234 | 1604335 | phosphatidylinositol 3-kinase catalytic delta polypeptide | Pik3cd | 366508 | 1,00 | up   |
| 6488100 | 7293234 | 1604335 | phosphatidylinositol 3-kinase catalytic delta polypeptide | Pik3cd | 366508 | 1,26 | down |
| 6582257 | 7293234 | 1604334 | phosphatidylinositol 3-kinase catalytic delta polypeptide | Pik3cd | 366508 | 1,54 | up   |
| 6614206 | 7293234 | 1604329 | phosphatidylinositol 3-kinase catalytic delta polypeptide | Pik3cd | 366508 | 1,05 | up   |
| 6632982 | 7293234 | 1604342 | phosphatidylinositol 3-kinase catalytic delta polypeptide | Pik3cd | 366508 | 1,18 | down |
| 6645178 | 7293234 | 1604330 | phosphatidylinositol 3-kinase catalytic delta polypeptide | Pik3cd | 366508 | 1,06 | down |
| 6654324 | 7293234 | 1604354 | phosphatidylinositol 3-kinase catalytic delta polypeptide | Pik3cd | 366508 | 1,36 | up   |
| 6654854 | 7293234 | 1604335 | phosphatidylinositol 3-kinase catalytic delta polypeptide | Pik3cd | 366508 | 1,74 | down |
| 5762017 | 7196852 | 1367444 | phosphatidylinositol 4-kinase, catalytic, beta            | Pi4kb  | 81747  | 1,10 | up   |
| 5775859 | 7196852 | 1367452 | phosphatidylinositol 4-kinase, catalytic, beta            | Pi4kb  | 81747  | 1,40 | up   |
| 5818067 | 7196852 | 1367450 | phosphatidylinositol 4-kinase, catalytic, beta            | Pi4kb  | 81747  | 1,26 | down |
| 5889391 | 7196852 | 1367447 | phosphatidylinositol 4-kinase, catalytic, beta            | Pi4kb  | 81747  | 1,03 | down |
| 5947095 | 7196852 | 1367441 | phosphatidylinositol 4-kinase, catalytic, beta            | Pi4kb  | 81747  | 1,19 | down |
| 5950031 | 7196852 | 1367449 | phosphatidylinositol 4-kinase, catalytic, beta            | Pi4kb  | 81747  | 2,20 | up   |
| 6071704 | 7196852 | 1367439 | phosphatidylinositol 4-kinase, catalytic, beta            | Pi4kb  | 81747  | 1,04 | down |
| 6075367 | 7196852 | 1367439 | phosphatidylinositol 4-kinase, catalytic, beta            | Pi4kb  | 81747  | 1,97 | up   |
| 6108378 | 7196852 | 1367451 | phosphatidylinositol 4-kinase, catalytic, beta            | Pi4kb  | 81747  | 1,20 | down |
| 6273863 | 7196852 | 1367442 | phosphatidylinositol 4-kinase, catalytic, beta            | Pi4kb  | 81747  | 1,06 | up   |
| 6393678 | 7196852 | 1367443 | phosphatidylinositol 4-kinase, catalytic, beta            | Pi4kb  | 81747  | 1,33 | up   |
| 6485300 | 7196852 | 1367448 | phosphatidylinositol 4-kinase, catalytic, beta            | Pi4kb  | 81747  | 1,00 | down |
| 6534269 | 7196852 | 1367445 | phosphatidylinositol 4-kinase, catalytic, beta            | Pi4kb  | 81747  | 1,04 | up   |
| 6575784 | 7196852 | 1367446 | phosphatidylinositol 4-kinase, catalytic, beta            | Pi4kb  | 81747  | 1,24 | down |
| 6585468 | 7196852 | 1367440 | phosphatidylinositol 4-kinase, catalytic, beta            | Pi4kb  | 81747  | 1,22 | up   |
| 5697253 | 7079958 | 1079446 | phosphatidylinositol glycan anchor biosynthesis, class S  | Pigs   | 303277 | 1,35 | down |
| 5699960 | 7079958 | 1079445 | phosphatidylinositol glycan anchor biosynthesis, class S  | Pigs   | 303277 | 1,01 | up   |
| 5709373 | 7079958 | 1079452 | phosphatidylinositol glycan anchor biosynthesis, class S  | Pigs   | 303277 | 1,18 | up   |
| 5732922 | 7079958 | 1079445 | phosphatidylinositol glycan anchor biosynthesis, class S  | Pigs   | 303277 | 1,12 | up   |
| 5781637 | 7079958 | 1079457 | phosphatidylinositol glycan anchor biosynthesis, class S  | Pigs   | 303277 | 2,17 | up   |
| 5831628 | 7079958 | 1079449 | phosphatidylinositol glycan anchor biosynthesis, class S  | Pigs   | 303277 | 1,13 | up   |
| 5837719 | 7079958 | 1079454 | phosphatidylinositol glycan anchor biosynthesis, class S  | Pigs   | 303277 | 1,01 | down |
| 5951820 | 7079958 | 1079456 | phosphatidylinositol glycan anchor biosynthesis, class S  | Pigs   | 303277 | 1,11 | up   |
| 5985174 | 7079958 | 1079455 | phosphatidylinositol glycan anchor biosynthesis, class S  | Pigs   | 303277 | 1,06 | down |
| 5987319 | 7079958 | 1079446 | phosphatidylinositol glycan anchor biosynthesis, class S  | Pigs   | 303277 | 1,01 | down |
| 6178364 | 7079958 | 1079448 | phosphatidylinositol glycan anchor biosynthesis, class S  | Pigs   | 303277 | 1,20 | up   |
| 6224759 | 7079958 | 1079453 | phosphatidylinositol glycan anchor biosynthesis, class S  | Pigs   | 303277 | 1,18 | up   |
| 6249241 | 7079958 | 1079450 | phosphatidylinositol glycan anchor biosynthesis, class S  | Pigs   | 303277 | 1,11 | down |
| 6352199 | 7079958 | 1079447 | phosphatidylinositol glycan anchor biosynthesis, class S  | Pigs   | 303277 | 1,12 | down |

|         |         |         |                                                                          |         |        |      |      |
|---------|---------|---------|--------------------------------------------------------------------------|---------|--------|------|------|
| 6578335 | 7079958 | 1079451 | phosphatidylinositol glycan anchor biosynthesis, class S                 | Pigs    | 303277 | 1,33 | down |
| 6592291 | 7079958 | 1079445 | phosphatidylinositol glycan anchor biosynthesis, class S                 | Pigs    | 303277 | 1,25 | down |
| 5617760 | 7248004 | 1492563 | phosphatidylinositol-3,4,5-trisphosphate-dependent Rac exchange factor 1 | Prex1   | 311647 | 1,14 | down |
| 5650665 | 7248004 | 1492569 | phosphatidylinositol-3,4,5-trisphosphate-dependent Rac exchange factor 1 | Prex1   | 311647 | 1,03 | down |
| 5661321 | 7248004 | 1492564 | phosphatidylinositol-3,4,5-trisphosphate-dependent Rac exchange factor 1 | Prex1   | 311647 | 1,26 | down |
| 5700395 | 7248004 | 1492609 | phosphatidylinositol-3,4,5-trisphosphate-dependent Rac exchange factor 1 | Prex1   | 311647 | 1,64 | down |
| 5709217 | 7248004 | 1492581 | phosphatidylinositol-3,4,5-trisphosphate-dependent Rac exchange factor 1 | Prex1   | 311647 | 1,06 | down |
| 5781202 | 7248004 | 1492558 | phosphatidylinositol-3,4,5-trisphosphate-dependent Rac exchange factor 1 | Prex1   | 311647 | 1,29 | down |
| 5790284 | 7248004 | 1492574 | phosphatidylinositol-3,4,5-trisphosphate-dependent Rac exchange factor 1 | Prex1   | 311647 | 1,32 | up   |
| 5833747 | 7248004 | 1492573 | phosphatidylinositol-3,4,5-trisphosphate-dependent Rac exchange factor 1 | Prex1   | 311647 | 1,09 | up   |
| 5855735 | 7248004 | 1492591 | phosphatidylinositol-3,4,5-trisphosphate-dependent Rac exchange factor 1 | Prex1   | 311647 | 1,91 | down |
| 5886240 | 7248004 | 1492626 | phosphatidylinositol-3,4,5-trisphosphate-dependent Rac exchange factor 1 | Prex1   | 311647 | 1,21 | up   |
| 5886574 | 7248004 | 1492598 | phosphatidylinositol-3,4,5-trisphosphate-dependent Rac exchange factor 1 | Prex1   | 311647 | 1,06 | down |
| 5909527 | 7248004 | 1492573 | phosphatidylinositol-3,4,5-trisphosphate-dependent Rac exchange factor 1 | Prex1   | 311647 | 1,45 | down |
| 5910841 | 7248004 | 1492565 | phosphatidylinositol-3,4,5-trisphosphate-dependent Rac exchange factor 1 | Prex1   | 311647 | 1,19 | down |
| 5931935 | 7248004 | 1492561 | phosphatidylinositol-3,4,5-trisphosphate-dependent Rac exchange factor 1 | Prex1   | 311647 | 1,21 | up   |
| 5963232 | 7248004 | 1492599 | phosphatidylinositol-3,4,5-trisphosphate-dependent Rac exchange factor 1 | Prex1   | 311647 | 1,04 | up   |
| 5972471 | 7248004 | 1492579 | phosphatidylinositol-3,4,5-trisphosphate-dependent Rac exchange factor 1 | Prex1   | 311647 | 1,25 | up   |
| 5973106 | 7248004 | 1492596 | phosphatidylinositol-3,4,5-trisphosphate-dependent Rac exchange factor 1 | Prex1   | 311647 | 1,31 | up   |
| 5983086 | 7248004 | 1492571 | phosphatidylinositol-3,4,5-trisphosphate-dependent Rac exchange factor 1 | Prex1   | 311647 | 1,36 | down |
| 6011857 | 7248004 | 1492592 | phosphatidylinositol-3,4,5-trisphosphate-dependent Rac exchange factor 1 | Prex1   | 311647 | 1,27 | down |
| 6031214 | 7248004 | 1492566 | phosphatidylinositol-3,4,5-trisphosphate-dependent Rac exchange factor 1 | Prex1   | 311647 | 1,50 | up   |
| 6043198 | 7248004 | 1492558 | phosphatidylinositol-3,4,5-trisphosphate-dependent Rac exchange factor 1 | Prex1   | 311647 | 1,00 | up   |
| 6065115 | 7248004 | 1492577 | phosphatidylinositol-3,4,5-trisphosphate-dependent Rac exchange factor 1 | Prex1   | 311647 | 1,27 | down |
| 6105255 | 7248004 | 1492586 | phosphatidylinositol-3,4,5-trisphosphate-dependent Rac exchange factor 1 | Prex1   | 311647 | 1,29 | up   |
| 6128972 | 7248004 | 1492597 | phosphatidylinositol-3,4,5-trisphosphate-dependent Rac exchange factor 1 | Prex1   | 311647 | 1,14 | up   |
| 6140508 | 7248004 | 1492610 | phosphatidylinositol-3,4,5-trisphosphate-dependent Rac exchange factor 1 | Prex1   | 311647 | 1,03 | down |
| 6172053 | 7248004 | 1492559 | phosphatidylinositol-3,4,5-trisphosphate-dependent Rac exchange factor 1 | Prex1   | 311647 | 1,11 | down |
| 6172753 | 7248004 | 1492563 | phosphatidylinositol-3,4,5-trisphosphate-dependent Rac exchange factor 1 | Prex1   | 311647 | 1,17 | up   |
| 6193349 | 7248004 | 1492600 | phosphatidylinositol-3,4,5-trisphosphate-dependent Rac exchange factor 1 | Prex1   | 311647 | 1,53 | down |
| 6234083 | 7248004 | 1492568 | phosphatidylinositol-3,4,5-trisphosphate-dependent Rac exchange factor 1 | Prex1   | 311647 | 1,36 | up   |
| 6234830 | 7248004 | 1492606 | phosphatidylinositol-3,4,5-trisphosphate-dependent Rac exchange factor 1 | Prex1   | 311647 | 1,05 | down |
| 6240573 | 7248004 | 1492588 | phosphatidylinositol-3,4,5-trisphosphate-dependent Rac exchange factor 1 | Prex1   | 311647 | 1,45 | up   |
| 6259346 | 7248004 | 1492573 | phosphatidylinositol-3,4,5-trisphosphate-dependent Rac exchange factor 1 | Prex1   | 311647 | 1,66 | down |
| 6275200 | 7248004 | 1492589 | phosphatidylinositol-3,4,5-trisphosphate-dependent Rac exchange factor 1 | Prex1   | 311647 | 1,35 | down |
| 6276056 | 7248004 | 1492586 | phosphatidylinositol-3,4,5-trisphosphate-dependent Rac exchange factor 1 | Prex1   | 311647 | 1,17 | up   |
| 6303055 | 7248004 | 1492590 | phosphatidylinositol-3,4,5-trisphosphate-dependent Rac exchange factor 1 | Prex1   | 311647 | 1,49 | down |
| 6328693 | 7248004 | 1492575 | phosphatidylinositol-3,4,5-trisphosphate-dependent Rac exchange factor 1 | Prex1   | 311647 | 1,15 | up   |
| 6344169 | 7248004 | 1492562 | phosphatidylinositol-3,4,5-trisphosphate-dependent Rac exchange factor 1 | Prex1   | 311647 | 1,15 | down |
| 6345103 | 7248004 | 1492570 | phosphatidylinositol-3,4,5-trisphosphate-dependent Rac exchange factor 1 | Prex1   | 311647 | 1,01 | up   |
| 6417664 | 7248004 | 1492604 | phosphatidylinositol-3,4,5-trisphosphate-dependent Rac exchange factor 1 | Prex1   | 311647 | 1,28 | up   |
| 6485386 | 7248004 | 1492558 | phosphatidylinositol-3,4,5-trisphosphate-dependent Rac exchange factor 1 | Prex1   | 311647 | 1,02 | up   |
| 6490470 | 7248004 | 1492576 | phosphatidylinositol-3,4,5-trisphosphate-dependent Rac exchange factor 1 | Prex1   | 311647 | 1,10 | up   |
| 6504854 | 7248004 | 1492578 | phosphatidylinositol-3,4,5-trisphosphate-dependent Rac exchange factor 1 | Prex1   | 311647 | 1,21 | down |
| 6524281 | 7248004 | 1492626 | phosphatidylinositol-3,4,5-trisphosphate-dependent Rac exchange factor 1 | Prex1   | 311647 | 2,16 | down |
| 6542979 | 7248004 | 1492560 | phosphatidylinositol-3,4,5-trisphosphate-dependent Rac exchange factor 1 | Prex1   | 311647 | 1,46 | up   |
| 6578283 | 7248004 | 1492576 | phosphatidylinositol-3,4,5-trisphosphate-dependent Rac exchange factor 1 | Prex1   | 311647 | 1,36 | up   |
| 6591089 | 7248004 | 1492586 | phosphatidylinositol-3,4,5-trisphosphate-dependent Rac exchange factor 1 | Prex1   | 311647 | 1,01 | up   |
| 6650354 | 7248004 | 1492558 | phosphatidylinositol-3,4,5-trisphosphate-dependent Rac exchange factor 1 | Prex1   | 311647 | 1,99 | up   |
| 6707546 | 7248004 | 1492572 | phosphatidylinositol-3,4,5-trisphosphate-dependent Rac exchange factor 1 | Prex1   | 311647 | 1,51 | up   |
| 6719174 | 7248004 | 1492582 | phosphatidylinositol-3,4,5-trisphosphate-dependent Rac exchange factor 1 | Prex1   | 311647 | 1,24 | up   |
| 5684985 | 7326233 | 1686313 | phosphatidylinositol-5-phosphate 4-kinase, type II, gamma                | Pip4k2c | 140607 | 2,95 | down |
| 5747979 | 7326233 | 1686303 | phosphatidylinositol-5-phosphate 4-kinase, type II, gamma                | Pip4k2c | 140607 | 1,07 | down |
| 5800851 | 7326233 | 1686306 | phosphatidylinositol-5-phosphate 4-kinase, type II, gamma                | Pip4k2c | 140607 | 1,08 | down |
| 5845760 | 7326233 | 1686311 | phosphatidylinositol-5-phosphate 4-kinase, type II, gamma                | Pip4k2c | 140607 | 1,01 | up   |
| 6085165 | 7326233 | 1686307 | phosphatidylinositol-5-phosphate 4-kinase, type II, gamma                | Pip4k2c | 140607 | 1,42 | down |

|         |         |         |                                                                      |         |        |      |      |
|---------|---------|---------|----------------------------------------------------------------------|---------|--------|------|------|
| 6092756 | 7326233 | 1686304 | phosphatidylinositol-5-phosphate 4-kinase, type II, gamma            | Pip4k2c | 140607 | 1,11 | down |
| 6163421 | 7326233 | 1686310 | phosphatidylinositol-5-phosphate 4-kinase, type II, gamma            | Pip4k2c | 140607 | 1,37 | up   |
| 6302338 | 7326233 | 1686313 | phosphatidylinositol-5-phosphate 4-kinase, type II, gamma            | Pip4k2c | 140607 | 1,00 | down |
| 6351009 | 7326233 | 1686312 | phosphatidylinositol-5-phosphate 4-kinase, type II, gamma            | Pip4k2c | 140607 | 1,09 | down |
| 6404419 | 7326233 | 1686308 | phosphatidylinositol-5-phosphate 4-kinase, type II, gamma            | Pip4k2c | 140607 | 1,36 | down |
| 6544611 | 7326233 | 1686309 | phosphatidylinositol-5-phosphate 4-kinase, type II, gamma            | Pip4k2c | 140607 | 1,06 | up   |
| 6566753 | 7326233 | 1686313 | phosphatidylinositol-5-phosphate 4-kinase, type II, gamma            | Pip4k2c | 140607 | 1,02 | up   |
| 6673561 | 7326233 | 1686305 | phosphatidylinositol-5-phosphate 4-kinase, type II, gamma            | Pip4k2c | 140607 | 1,23 | up   |
| 5884507 | 7087965 | 1098014 | phosphatidylinositol-specific phospholipase C, X domain containing 2 | Plcxd2  | 363781 | 1,98 | up   |
| 5906864 | 7087965 | 1098014 | phosphatidylinositol-specific phospholipase C, X domain containing 2 | Plcxd2  | 363781 | 1,94 | up   |
| 6053646 | 7087965 | 1098014 | phosphatidylinositol-specific phospholipase C, X domain containing 2 | Plcxd2  | 363781 | 1,64 | up   |
| 6578784 | 7087965 | 1098012 | phosphatidylinositol-specific phospholipase C, X domain containing 2 | Plcxd2  | 363781 | 2,29 | up   |
| 6639264 | 7087965 | 1098000 | phosphatidylinositol-specific phospholipase C, X domain containing 2 | Plcxd2  | 363781 | 2,52 | up   |
| 5625837 | 7046605 | 1002430 | phosphodiesterase 10A                                                | Pde10a  | 63885  | 1,26 | up   |
| 5649380 | 7046605 | 1002434 | phosphodiesterase 10A                                                | Pde10a  | 63885  | 1,32 | up   |
| 5666365 | 7046605 | 1002409 | phosphodiesterase 10A                                                | Pde10a  | 63885  | 1,20 | down |
| 5697356 | 7046605 | 1002423 | phosphodiesterase 10A                                                | Pde10a  | 63885  | 1,19 | down |
| 5713441 | 7046605 | 1002414 | phosphodiesterase 10A                                                | Pde10a  | 63885  | 1,03 | up   |
| 5714377 | 7046605 | 1002420 | phosphodiesterase 10A                                                | Pde10a  | 63885  | 1,88 | down |
| 5819433 | 7046605 | 1002417 | phosphodiesterase 10A                                                | Pde10a  | 63885  | 1,01 | down |
| 5830701 | 7046605 | 1002434 | phosphodiesterase 10A                                                | Pde10a  | 63885  | 1,43 | up   |
| 5903829 | 7046605 | 1002411 | phosphodiesterase 10A                                                | Pde10a  | 63885  | 1,17 | down |
| 5914502 | 7046605 | 1002410 | phosphodiesterase 10A                                                | Pde10a  | 63885  | 1,17 | down |
| 5921428 | 7046605 | 1002425 | phosphodiesterase 10A                                                | Pde10a  | 63885  | 1,04 | up   |
| 5979487 | 7046605 | 1002415 | phosphodiesterase 10A                                                | Pde10a  | 63885  | 1,18 | up   |
| 5985102 | 7046605 | 1002409 | phosphodiesterase 10A                                                | Pde10a  | 63885  | 1,24 | down |
| 6126348 | 7046605 | 1002426 | phosphodiesterase 10A                                                | Pde10a  | 63885  | 1,04 | up   |
| 6153282 | 7046605 | 1002419 | phosphodiesterase 10A                                                | Pde10a  | 63885  | 1,37 | down |
| 6279270 | 7046605 | 1002416 | phosphodiesterase 10A                                                | Pde10a  | 63885  | 1,01 | down |
| 6280030 | 7046605 | 1002422 | phosphodiesterase 10A                                                | Pde10a  | 63885  | 1,16 | down |
| 6294114 | 7046605 | 1002433 | phosphodiesterase 10A                                                | Pde10a  | 63885  | 2,40 | up   |
| 6296595 | 7046605 | 1002412 | phosphodiesterase 10A                                                | Pde10a  | 63885  | 1,18 | down |
| 6300936 | 7046605 | 1002429 | phosphodiesterase 10A                                                | Pde10a  | 63885  | 1,07 | down |
| 6329565 | 7046605 | 1002408 | phosphodiesterase 10A                                                | Pde10a  | 63885  | 1,07 | down |
| 6346746 | 7046605 | 1002432 | phosphodiesterase 10A                                                | Pde10a  | 63885  | 1,05 | up   |
| 6382295 | 7046605 | 1002418 | phosphodiesterase 10A                                                | Pde10a  | 63885  | 1,05 | up   |
| 6461699 | 7046605 | 1002424 | phosphodiesterase 10A                                                | Pde10a  | 63885  | 1,01 | down |
| 6476448 | 7046605 | 1002425 | phosphodiesterase 10A                                                | Pde10a  | 63885  | 1,06 | up   |
| 6521290 | 7046605 | 1002413 | phosphodiesterase 10A                                                | Pde10a  | 63885  | 1,18 | up   |
| 6527930 | 7046605 | 1002428 | phosphodiesterase 10A                                                | Pde10a  | 63885  | 1,12 | up   |
| 6615165 | 7046605 | 1002417 | phosphodiesterase 10A                                                | Pde10a  | 63885  | 1,16 | down |
| 6625205 | 7046605 | 1002432 | phosphodiesterase 10A                                                | Pde10a  | 63885  | 1,10 | down |
| 6660615 | 7046605 | 1002427 | phosphodiesterase 10A                                                | Pde10a  | 63885  | 1,09 | up   |
| 6686013 | 7046605 | 1002425 | phosphodiesterase 10A                                                | Pde10a  | 63885  | 1,14 | up   |
| 6732918 | 7046605 | 1002421 | phosphodiesterase 10A                                                | Pde10a  | 63885  | 1,14 | down |
| 6736258 | 7046605 | 1002434 | phosphodiesterase 10A                                                | Pde10a  | 63885  | 1,17 | up   |
| 5667685 | 7240420 | 1475058 | phosphodiesterase 11A                                                | Pde11a  | 140928 | 1,19 | up   |
| 5672856 | 7240420 | 1475057 | phosphodiesterase 11A                                                | Pde11a  | 140928 | 1,41 | down |
| 5698290 | 7240420 | 1475083 | phosphodiesterase 11A                                                | Pde11a  | 140928 | 1,21 | down |
| 5707134 | 7240420 | 1475057 | phosphodiesterase 11A                                                | Pde11a  | 140928 | 1,04 | down |
| 5790750 | 7240420 | 1475063 | phosphodiesterase 11A                                                | Pde11a  | 140928 | 1,14 | down |
| 5834201 | 7240420 | 1475077 | phosphodiesterase 11A                                                | Pde11a  | 140928 | 1,07 | up   |
| 5865905 | 7240420 | 1475065 | phosphodiesterase 11A                                                | Pde11a  | 140928 | 1,03 | down |
| 5999000 | 7240420 | 1475084 | phosphodiesterase 11A                                                | Pde11a  | 140928 | 1,00 | down |
| 6051203 | 7240420 | 1475057 | phosphodiesterase 11A                                                | Pde11a  | 140928 | 1,49 | up   |
| 6081268 | 7240420 | 1475060 | phosphodiesterase 11A                                                | Pde11a  | 140928 | 1,01 | down |

|         |         |         |                                                |                 |                  |      |      |
|---------|---------|---------|------------------------------------------------|-----------------|------------------|------|------|
| 6121194 | 7240420 | 1475070 | phosphodiesterase 11A                          | Pde11a          | 140928           | 1,18 | down |
| 6145943 | 7240420 | 1475057 | phosphodiesterase 11A                          | Pde11a          | 140928           | 1,23 | up   |
| 6168860 | 7240420 | 1475067 | phosphodiesterase 11A                          | Pde11a          | 140928           | 1,25 | down |
| 6284864 | 7240420 | 1475059 | phosphodiesterase 11A                          | Pde11a          | 140928           | 1,40 | up   |
| 6319327 | 7240420 | 1475069 | phosphodiesterase 11A                          | Pde11a          | 140928           | 1,36 | down |
| 6321006 | 7240420 | 1475071 | phosphodiesterase 11A                          | Pde11a          | 140928           | 1,18 | down |
| 6343718 | 7240420 | 1475075 | phosphodiesterase 11A                          | Pde11a          | 140928           | 1,39 | up   |
| 6346476 | 7240420 | 1475064 | phosphodiesterase 11A                          | Pde11a          | 140928           | 1,06 | down |
| 6375588 | 7240420 | 1475062 | phosphodiesterase 11A                          | Pde11a          | 140928           | 1,05 | down |
| 6424502 | 7240420 | 1475076 | phosphodiesterase 11A                          | Pde11a          | 140928           | 1,06 | down |
| 6426758 | 7240420 | 1475068 | phosphodiesterase 11A                          | Pde11a          | 140928           | 1,09 | down |
| 6453368 | 7240420 | 1475061 | phosphodiesterase 11A                          | Pde11a          | 140928           | 1,20 | down |
| 6540568 | 7240420 | 1475057 | phosphodiesterase 11A                          | Pde11a          | 140928           | 1,01 | up   |
| 6554690 | 7240420 | 1475073 | phosphodiesterase 11A                          | Pde11a          | 140928           | 1,07 | up   |
| 6561392 | 7240420 | 1475060 | phosphodiesterase 11A                          | Pde11a          | 140928           | 1,81 | up   |
| 6568899 | 7240420 | 1475072 | phosphodiesterase 11A                          | Pde11a          | 140928           | 2,38 | up   |
| 6584057 | 7240420 | 1475078 | phosphodiesterase 11A                          | Pde11a          | 140928           | 1,06 | up   |
| 6607098 | 7240420 | 1475057 | phosphodiesterase 11A                          | Pde11a          | 140928           | 1,13 | down |
| 6674480 | 7240420 | 1475073 | phosphodiesterase 11A                          | Pde11a          | 140928           | 1,26 | down |
| 6686685 | 7240420 | 1475074 | phosphodiesterase 11A                          | Pde11a          | 140928           | 1,51 | down |
| 6739615 | 7240420 | 1475066 | phosphodiesterase 11A                          | Pde11a          | 140928           | 1,15 | up   |
| 5643875 | 7240420 | 1475082 | phosphodiesterase 11A /// cytochrome c, testis | Pde11a /// Cyst | 140928 /// 25310 | 1,01 | up   |
| 6079025 | 7240420 | 1475081 | phosphodiesterase 11A /// cytochrome c, testis | Pde11a /// Cyst | 140928 /// 25310 | 1,09 | down |
| 5633642 | 7321206 | 1675199 | phosphodiesterase 1B, calmodulin-dependent     | Pde1b           | 29691            | 1,86 | down |
| 5655075 | 7321206 | 1675186 | phosphodiesterase 1B, calmodulin-dependent     | Pde1b           | 29691            | 1,45 | up   |
| 5777511 | 7321206 | 1675194 | phosphodiesterase 1B, calmodulin-dependent     | Pde1b           | 29691            | 1,04 | up   |
| 5783056 | 7321206 | 1675187 | phosphodiesterase 1B, calmodulin-dependent     | Pde1b           | 29691            | 1,10 | up   |
| 5872711 | 7321206 | 1675190 | phosphodiesterase 1B, calmodulin-dependent     | Pde1b           | 29691            | 1,99 | up   |
| 6071252 | 7321206 | 1675196 | phosphodiesterase 1B, calmodulin-dependent     | Pde1b           | 29691            | 1,63 | up   |
| 6142158 | 7321206 | 1675189 | phosphodiesterase 1B, calmodulin-dependent     | Pde1b           | 29691            | 1,72 | up   |
| 6262697 | 7321206 | 1675195 | phosphodiesterase 1B, calmodulin-dependent     | Pde1b           | 29691            | 1,07 | down |
| 6312815 | 7321206 | 1675198 | phosphodiesterase 1B, calmodulin-dependent     | Pde1b           | 29691            | 1,34 | down |
| 6350640 | 7321206 | 1675191 | phosphodiesterase 1B, calmodulin-dependent     | Pde1b           | 29691            | 2,29 | up   |
| 6352322 | 7321206 | 1675192 | phosphodiesterase 1B, calmodulin-dependent     | Pde1b           | 29691            | 1,13 | down |
| 6407756 | 7321206 | 1675188 | phosphodiesterase 1B, calmodulin-dependent     | Pde1b           | 29691            | 1,61 | down |
| 6484236 | 7321206 | 1675197 | phosphodiesterase 1B, calmodulin-dependent     | Pde1b           | 29691            | 1,49 | up   |
| 6569327 | 7321206 | 1675193 | phosphodiesterase 1B, calmodulin-dependent     | Pde1b           | 29691            | 1,63 | down |
| 5618309 | 7034699 | 973074  | phosphodiesterase 2A, cGMP-stimulated          | Pde2a           | 81743            | 1,29 | up   |
| 5695774 | 7034699 | 973088  | phosphodiesterase 2A, cGMP-stimulated          | Pde2a           | 81743            | 1,16 | down |
| 5747297 | 7034699 | 973096  | phosphodiesterase 2A, cGMP-stimulated          | Pde2a           | 81743            | 1,08 | down |
| 5840942 | 7034699 | 973087  | phosphodiesterase 2A, cGMP-stimulated          | Pde2a           | 81743            | 1,13 | up   |
| 5844959 | 7034699 | 973082  | phosphodiesterase 2A, cGMP-stimulated          | Pde2a           | 81743            | 1,46 | down |
| 5856577 | 7034699 | 973097  | phosphodiesterase 2A, cGMP-stimulated          | Pde2a           | 81743            | 1,76 | down |
| 5871727 | 7034699 | 973084  | phosphodiesterase 2A, cGMP-stimulated          | Pde2a           | 81743            | 1,00 | down |
| 5893866 | 7034699 | 973095  | phosphodiesterase 2A, cGMP-stimulated          | Pde2a           | 81743            | 1,07 | up   |
| 5907010 | 7034699 | 973090  | phosphodiesterase 2A, cGMP-stimulated          | Pde2a           | 81743            | 2,18 | up   |
| 5922654 | 7034699 | 973086  | phosphodiesterase 2A, cGMP-stimulated          | Pde2a           | 81743            | 1,05 | up   |
| 6013760 | 7034699 | 973083  | phosphodiesterase 2A, cGMP-stimulated          | Pde2a           | 81743            | 1,47 | down |
| 6037901 | 7034699 | 973077  | phosphodiesterase 2A, cGMP-stimulated          | Pde2a           | 81743            | 2,00 | down |
| 6120805 | 7034699 | 973094  | phosphodiesterase 2A, cGMP-stimulated          | Pde2a           | 81743            | 1,05 | up   |
| 6130762 | 7034699 | 973079  | phosphodiesterase 2A, cGMP-stimulated          | Pde2a           | 81743            | 1,36 | up   |
| 6166259 | 7034699 | 973092  | phosphodiesterase 2A, cGMP-stimulated          | Pde2a           | 81743            | 1,06 | down |
| 6287513 | 7034699 | 973067  | phosphodiesterase 2A, cGMP-stimulated          | Pde2a           | 81743            | 1,28 | up   |
| 6295618 | 7034699 | 973078  | phosphodiesterase 2A, cGMP-stimulated          | Pde2a           | 81743            | 1,16 | down |
| 6298898 | 7034699 | 973085  | phosphodiesterase 2A, cGMP-stimulated          | Pde2a           | 81743            | 1,10 | down |
| 6306226 | 7034699 | 973070  | phosphodiesterase 2A, cGMP-stimulated          | Pde2a           | 81743            | 1,22 | down |

|         |         |         |                                                                              |         |        |      |      |
|---------|---------|---------|------------------------------------------------------------------------------|---------|--------|------|------|
| 6354095 | 7034699 | 973072  | phosphodiesterase 2A, cGMP-stimulated                                        | Pde2a   | 81743  | 1,20 | up   |
| 6372120 | 7034699 | 973069  | phosphodiesterase 2A, cGMP-stimulated                                        | Pde2a   | 81743  | 1,01 | up   |
| 6375331 | 7034699 | 973080  | phosphodiesterase 2A, cGMP-stimulated                                        | Pde2a   | 81743  | 1,06 | up   |
| 6393671 | 7034699 | 973068  | phosphodiesterase 2A, cGMP-stimulated                                        | Pde2a   | 81743  | 1,06 | up   |
| 6395289 | 7034699 | 973081  | phosphodiesterase 2A, cGMP-stimulated                                        | Pde2a   | 81743  | 1,63 | down |
| 6423630 | 7034699 | 973093  | phosphodiesterase 2A, cGMP-stimulated                                        | Pde2a   | 81743  | 1,16 | down |
| 6452317 | 7034699 | 973075  | phosphodiesterase 2A, cGMP-stimulated                                        | Pde2a   | 81743  | 1,21 | down |
| 6457824 | 7034699 | 973076  | phosphodiesterase 2A, cGMP-stimulated                                        | Pde2a   | 81743  | 1,32 | down |
| 6465204 | 7034699 | 973089  | phosphodiesterase 2A, cGMP-stimulated                                        | Pde2a   | 81743  | 1,15 | up   |
| 6590066 | 7034699 | 973071  | phosphodiesterase 2A, cGMP-stimulated                                        | Pde2a   | 81743  | 1,09 | up   |
| 6593937 | 7034699 | 973067  | phosphodiesterase 2A, cGMP-stimulated                                        | Pde2a   | 81743  | 1,52 | up   |
| 6621647 | 7034699 | 973073  | phosphodiesterase 2A, cGMP-stimulated                                        | Pde2a   | 81743  | 1,24 | up   |
| 6713965 | 7034699 | 973091  | phosphodiesterase 2A, cGMP-stimulated                                        | Pde2a   | 81743  | 1,63 | up   |
| 5700069 | 7333487 | 1703683 | phosphodiesterase 4A, cAMP-specific (phosphodiesterase E2 dunce homolog, Drc | Pde4a   | 25638  | 1,03 | up   |
| 5704413 | 7333487 | 1703691 | phosphodiesterase 4A, cAMP-specific (phosphodiesterase E2 dunce homolog, Drc | Pde4a   | 25638  | 2,27 | down |
| 5778064 | 7333487 | 1703685 | phosphodiesterase 4A, cAMP-specific (phosphodiesterase E2 dunce homolog, Drc | Pde4a   | 25638  | 1,47 | up   |
| 5834669 | 7333487 | 1703687 | phosphodiesterase 4A, cAMP-specific (phosphodiesterase E2 dunce homolog, Drc | Pde4a   | 25638  | 1,37 | down |
| 5845406 | 7333487 | 1703689 | phosphodiesterase 4A, cAMP-specific (phosphodiesterase E2 dunce homolog, Drc | Pde4a   | 25638  | 1,05 | down |
| 5930127 | 7333487 | 1703688 | phosphodiesterase 4A, cAMP-specific (phosphodiesterase E2 dunce homolog, Drc | Pde4a   | 25638  | 1,43 | down |
| 5933129 | 7333487 | 1703692 | phosphodiesterase 4A, cAMP-specific (phosphodiesterase E2 dunce homolog, Drc | Pde4a   | 25638  | 1,32 | up   |
| 6031486 | 7333487 | 1703681 | phosphodiesterase 4A, cAMP-specific (phosphodiesterase E2 dunce homolog, Drc | Pde4a   | 25638  | 1,97 | down |
| 6080168 | 7333487 | 1703692 | phosphodiesterase 4A, cAMP-specific (phosphodiesterase E2 dunce homolog, Drc | Pde4a   | 25638  | 1,12 | down |
| 6126920 | 7333487 | 1703679 | phosphodiesterase 4A, cAMP-specific (phosphodiesterase E2 dunce homolog, Drc | Pde4a   | 25638  | 2,25 | up   |
| 6136216 | 7333487 | 1703680 | phosphodiesterase 4A, cAMP-specific (phosphodiesterase E2 dunce homolog, Drc | Pde4a   | 25638  | 1,18 | up   |
| 6164558 | 7333487 | 1703685 | phosphodiesterase 4A, cAMP-specific (phosphodiesterase E2 dunce homolog, Drc | Pde4a   | 25638  | 1,03 | up   |
| 6290425 | 7333487 | 1703684 | phosphodiesterase 4A, cAMP-specific (phosphodiesterase E2 dunce homolog, Drc | Pde4a   | 25638  | 1,66 | up   |
| 6358190 | 7333487 | 1703686 | phosphodiesterase 4A, cAMP-specific (phosphodiesterase E2 dunce homolog, Drc | Pde4a   | 25638  | 1,24 | up   |
| 6403505 | 7333487 | 1703678 | phosphodiesterase 4A, cAMP-specific (phosphodiesterase E2 dunce homolog, Drc | Pde4a   | 25638  | 1,04 | up   |
| 6417773 | 7333487 | 1703692 | phosphodiesterase 4A, cAMP-specific (phosphodiesterase E2 dunce homolog, Drc | Pde4a   | 25638  | 1,00 | up   |
| 6424578 | 7333487 | 1703685 | phosphodiesterase 4A, cAMP-specific (phosphodiesterase E2 dunce homolog, Drc | Pde4a   | 25638  | 1,22 | down |
| 6496108 | 7333487 | 1703692 | phosphodiesterase 4A, cAMP-specific (phosphodiesterase E2 dunce homolog, Drc | Pde4a   | 25638  | 1,48 | down |
| 6497646 | 7333487 | 1703678 | phosphodiesterase 4A, cAMP-specific (phosphodiesterase E2 dunce homolog, Drc | Pde4a   | 25638  | 1,12 | down |
| 6532784 | 7333487 | 1703692 | phosphodiesterase 4A, cAMP-specific (phosphodiesterase E2 dunce homolog, Drc | Pde4a   | 25638  | 1,26 | down |
| 6557599 | 7333487 | 1703692 | phosphodiesterase 4A, cAMP-specific (phosphodiesterase E2 dunce homolog, Drc | Pde4a   | 25638  | 1,07 | down |
| 6563180 | 7333487 | 1703679 | phosphodiesterase 4A, cAMP-specific (phosphodiesterase E2 dunce homolog, Drc | Pde4a   | 25638  | 1,04 | down |
| 6675233 | 7333487 | 1703690 | phosphodiesterase 4A, cAMP-specific (phosphodiesterase E2 dunce homolog, Drc | Pde4a   | 25638  | 1,03 | down |
| 6701371 | 7333487 | 1703682 | phosphodiesterase 4A, cAMP-specific (phosphodiesterase E2 dunce homolog, Drc | Pde4a   | 25638  | 1,36 | up   |
| 5716680 | 7149817 | 1250304 | phosphodiesterase 4C, cAMP-specific (phosphodiesterase E1 dunce homolog, Drc | Pde4c   | 290646 | 1,20 | up   |
| 5752152 | 7149817 | 1250306 | phosphodiesterase 4C, cAMP-specific (phosphodiesterase E1 dunce homolog, Drc | Pde4c   | 290646 | 1,26 | up   |
| 5752199 | 7149817 | 1250313 | phosphodiesterase 4C, cAMP-specific (phosphodiesterase E1 dunce homolog, Drc | Pde4c   | 290646 | 1,11 | up   |
| 5818753 | 7149817 | 1250308 | phosphodiesterase 4C, cAMP-specific (phosphodiesterase E1 dunce homolog, Drc | Pde4c   | 290646 | 1,22 | up   |
| 5855916 | 7149817 | 1250307 | phosphodiesterase 4C, cAMP-specific (phosphodiesterase E1 dunce homolog, Drc | Pde4c   | 290646 | 1,11 | down |
| 5959089 | 7149817 | 1250309 | phosphodiesterase 4C, cAMP-specific (phosphodiesterase E1 dunce homolog, Drc | Pde4c   | 290646 | 1,01 | up   |
| 6008344 | 7149817 | 1250307 | phosphodiesterase 4C, cAMP-specific (phosphodiesterase E1 dunce homolog, Drc | Pde4c   | 290646 | 1,36 | up   |
| 6066581 | 7149817 | 1250309 | phosphodiesterase 4C, cAMP-specific (phosphodiesterase E1 dunce homolog, Drc | Pde4c   | 290646 | 1,17 | up   |
| 6137443 | 7149817 | 1250310 | phosphodiesterase 4C, cAMP-specific (phosphodiesterase E1 dunce homolog, Drc | Pde4c   | 290646 | 1,21 | down |
| 6230974 | 7149817 | 1250311 | phosphodiesterase 4C, cAMP-specific (phosphodiesterase E1 dunce homolog, Drc | Pde4c   | 290646 | 2,36 | down |
| 6412552 | 7149817 | 1250309 | phosphodiesterase 4C, cAMP-specific (phosphodiesterase E1 dunce homolog, Drc | Pde4c   | 290646 | 1,21 | down |
| 6446699 | 7149817 | 1250310 | phosphodiesterase 4C, cAMP-specific (phosphodiesterase E1 dunce homolog, Drc | Pde4c   | 290646 | 1,05 | up   |
| 6502661 | 7149817 | 1250307 | phosphodiesterase 4C, cAMP-specific (phosphodiesterase E1 dunce homolog, Drc | Pde4c   | 290646 | 1,20 | up   |
| 6675002 | 7149817 | 1250307 | phosphodiesterase 4C, cAMP-specific (phosphodiesterase E1 dunce homolog, Drc | Pde4c   | 290646 | 1,07 | up   |
| 6707333 | 7149817 | 1250309 | phosphodiesterase 4C, cAMP-specific (phosphodiesterase E1 dunce homolog, Drc | Pde4c   | 290646 | 1,33 | up   |
| 6740920 | 7149817 | 1250312 | phosphodiesterase 4C, cAMP-specific (phosphodiesterase E1 dunce homolog, Drc | Pde4c   | 290646 | 1,61 | up   |
| 6744853 | 7149817 | 1250305 | phosphodiesterase 4C, cAMP-specific (phosphodiesterase E1 dunce homolog, Drc | Pde4c   | 290646 | 1,79 | up   |
| 5632325 | 7211830 | 1402934 | phosphodiesterase 4D interacting protein                                     | Pde4dip | 64183  | 1,28 | down |
| 5698631 | 7211830 | 1402919 | phosphodiesterase 4D interacting protein                                     | Pde4dip | 64183  | 1,13 | down |

|         |         |         |                                          |         |        |      |      |
|---------|---------|---------|------------------------------------------|---------|--------|------|------|
| 5717694 | 7211830 | 1402924 | phosphodiesterase 4D interacting protein | Pde4dip | 64183  | 1,06 | down |
| 5717943 | 7211830 | 1402923 | phosphodiesterase 4D interacting protein | Pde4dip | 64183  | 1,03 | up   |
| 5737276 | 7211830 | 1402914 | phosphodiesterase 4D interacting protein | Pde4dip | 64183  | 1,06 | up   |
| 5746365 | 7211830 | 1402929 | phosphodiesterase 4D interacting protein | Pde4dip | 64183  | 1,10 | down |
| 5748144 | 7211830 | 1402905 | phosphodiesterase 4D interacting protein | Pde4dip | 64183  | 1,25 | down |
| 5756697 | 7211830 | 1402909 | phosphodiesterase 4D interacting protein | Pde4dip | 64183  | 1,16 | up   |
| 5790389 | 7211830 | 1402918 | phosphodiesterase 4D interacting protein | Pde4dip | 64183  | 1,08 | down |
| 5833450 | 7211830 | 1402937 | phosphodiesterase 4D interacting protein | Pde4dip | 64183  | 1,01 | up   |
| 5833638 | 7211830 | 1402933 | phosphodiesterase 4D interacting protein | Pde4dip | 64183  | 1,11 | down |
| 5844836 | 7211830 | 1402911 | phosphodiesterase 4D interacting protein | Pde4dip | 64183  | 1,26 | up   |
| 5866781 | 7211830 | 1402900 | phosphodiesterase 4D interacting protein | Pde4dip | 64183  | 2,08 | down |
| 5895158 | 7211830 | 1402943 | phosphodiesterase 4D interacting protein | Pde4dip | 64183  | 1,01 | down |
| 5929171 | 7211830 | 1402939 | phosphodiesterase 4D interacting protein | Pde4dip | 64183  | 1,04 | down |
| 5933034 | 7211830 | 1402907 | phosphodiesterase 4D interacting protein | Pde4dip | 64183  | 2,18 | up   |
| 5939051 | 7211830 | 1402941 | phosphodiesterase 4D interacting protein | Pde4dip | 64183  | 1,28 | up   |
| 5982387 | 7211830 | 1402931 | phosphodiesterase 4D interacting protein | Pde4dip | 64183  | 1,03 | up   |
| 6016032 | 7211830 | 1402928 | phosphodiesterase 4D interacting protein | Pde4dip | 64183  | 1,07 | up   |
| 6016691 | 7211830 | 1402926 | phosphodiesterase 4D interacting protein | Pde4dip | 64183  | 1,03 | down |
| 6019538 | 7211830 | 1402942 | phosphodiesterase 4D interacting protein | Pde4dip | 64183  | 1,01 | down |
| 6044526 | 7211830 | 1402929 | phosphodiesterase 4D interacting protein | Pde4dip | 64183  | 1,12 | up   |
| 6046486 | 7211830 | 1402915 | phosphodiesterase 4D interacting protein | Pde4dip | 64183  | 1,12 | down |
| 6058474 | 7211830 | 1402903 | phosphodiesterase 4D interacting protein | Pde4dip | 64183  | 1,06 | down |
| 6076880 | 7211830 | 1402926 | phosphodiesterase 4D interacting protein | Pde4dip | 64183  | 1,03 | up   |
| 6093195 | 7211830 | 1402910 | phosphodiesterase 4D interacting protein | Pde4dip | 64183  | 1,01 | up   |
| 6155378 | 7211830 | 1402906 | phosphodiesterase 4D interacting protein | Pde4dip | 64183  | 1,07 | up   |
| 6163054 | 7211830 | 1402904 | phosphodiesterase 4D interacting protein | Pde4dip | 64183  | 1,06 | up   |
| 6216397 | 7211830 | 1402912 | phosphodiesterase 4D interacting protein | Pde4dip | 64183  | 1,22 | up   |
| 6247996 | 7211830 | 1402920 | phosphodiesterase 4D interacting protein | Pde4dip | 64183  | 1,02 | up   |
| 6287075 | 7211830 | 1402932 | phosphodiesterase 4D interacting protein | Pde4dip | 64183  | 1,03 | up   |
| 6289931 | 7211830 | 1402930 | phosphodiesterase 4D interacting protein | Pde4dip | 64183  | 1,08 | up   |
| 6316253 | 7211830 | 1402913 | phosphodiesterase 4D interacting protein | Pde4dip | 64183  | 1,27 | up   |
| 6355482 | 7211830 | 1402908 | phosphodiesterase 4D interacting protein | Pde4dip | 64183  | 2,09 | down |
| 6362171 | 7211830 | 1402935 | phosphodiesterase 4D interacting protein | Pde4dip | 64183  | 1,20 | up   |
| 6387259 | 7211830 | 1402936 | phosphodiesterase 4D interacting protein | Pde4dip | 64183  | 1,06 | up   |
| 6396842 | 7211830 | 1402938 | phosphodiesterase 4D interacting protein | Pde4dip | 64183  | 1,08 | down |
| 6467722 | 7211830 | 1402902 | phosphodiesterase 4D interacting protein | Pde4dip | 64183  | 1,00 | up   |
| 6480212 | 7211830 | 1402921 | phosphodiesterase 4D interacting protein | Pde4dip | 64183  | 1,07 | up   |
| 6517113 | 7211830 | 1402943 | phosphodiesterase 4D interacting protein | Pde4dip | 64183  | 1,18 | up   |
| 6543923 | 7211830 | 1402925 | phosphodiesterase 4D interacting protein | Pde4dip | 64183  | 1,07 | down |
| 6563651 | 7211830 | 1402901 | phosphodiesterase 4D interacting protein | Pde4dip | 64183  | 1,22 | down |
| 6567655 | 7211830 | 1402940 | phosphodiesterase 4D interacting protein | Pde4dip | 64183  | 1,08 | down |
| 6601650 | 7211830 | 1402927 | phosphodiesterase 4D interacting protein | Pde4dip | 64183  | 1,11 | down |
| 6656695 | 7211830 | 1402922 | phosphodiesterase 4D interacting protein | Pde4dip | 64183  | 1,10 | down |
| 6708289 | 7211830 | 1402921 | phosphodiesterase 4D interacting protein | Pde4dip | 64183  | 1,50 | up   |
| 6730211 | 7211830 | 1402917 | phosphodiesterase 4D interacting protein | Pde4dip | 64183  | 1,10 | down |
| 5770004 | 7198690 | 1372549 | phosphodiesterase 5A, cGMP-specific      | Pde5a   | 171115 | 1,19 | down |
| 5774613 | 7198690 | 1372534 | phosphodiesterase 5A, cGMP-specific      | Pde5a   | 171115 | 1,26 | down |
| 5796363 | 7198690 | 1372541 | phosphodiesterase 5A, cGMP-specific      | Pde5a   | 171115 | 1,14 | down |
| 5813293 | 7198690 | 1372550 | phosphodiesterase 5A, cGMP-specific      | Pde5a   | 171115 | 1,15 | up   |
| 5890787 | 7198690 | 1372535 | phosphodiesterase 5A, cGMP-specific      | Pde5a   | 171115 | 1,02 | down |
| 5909440 | 7198690 | 1372548 | phosphodiesterase 5A, cGMP-specific      | Pde5a   | 171115 | 1,03 | down |
| 5949245 | 7198690 | 1372536 | phosphodiesterase 5A, cGMP-specific      | Pde5a   | 171115 | 1,32 | down |
| 6085795 | 7198690 | 1372538 | phosphodiesterase 5A, cGMP-specific      | Pde5a   | 171115 | 1,31 | up   |
| 6091242 | 7198690 | 1372532 | phosphodiesterase 5A, cGMP-specific      | Pde5a   | 171115 | 1,17 | down |
| 6201535 | 7198690 | 1372537 | phosphodiesterase 5A, cGMP-specific      | Pde5a   | 171115 | 1,03 | up   |
| 6217110 | 7198690 | 1372546 | phosphodiesterase 5A, cGMP-specific      | Pde5a   | 171115 | 1,43 | down |



|         |         |         |                                                 |       |        |      |      |
|---------|---------|---------|-------------------------------------------------|-------|--------|------|------|
| 6249666 | 7198690 | 1372543 | phosphodiesterase 5A, cGMP-specific             | Pde5a | 171115 | 1,42 | up   |
| 6250116 | 7198690 | 1372552 | phosphodiesterase 5A, cGMP-specific             | Pde5a | 171115 | 1,13 | up   |
| 6306659 | 7198690 | 1372532 | phosphodiesterase 5A, cGMP-specific             | Pde5a | 171115 | 2,42 | up   |
| 6342926 | 7198690 | 1372547 | phosphodiesterase 5A, cGMP-specific             | Pde5a | 171115 | 1,10 | down |
| 6398746 | 7198690 | 1372551 | phosphodiesterase 5A, cGMP-specific             | Pde5a | 171115 | 1,09 | down |
| 6460407 | 7198690 | 1372540 | phosphodiesterase 5A, cGMP-specific             | Pde5a | 171115 | 1,28 | up   |
| 6469174 | 7198690 | 1372533 | phosphodiesterase 5A, cGMP-specific             | Pde5a | 171115 | 1,21 | up   |
| 6545012 | 7198690 | 1372532 | phosphodiesterase 5A, cGMP-specific             | Pde5a | 171115 | 1,63 | up   |
| 6573047 | 7198690 | 1372544 | phosphodiesterase 5A, cGMP-specific             | Pde5a | 171115 | 1,35 | down |
| 6627521 | 7198690 | 1372539 | phosphodiesterase 5A, cGMP-specific             | Pde5a | 171115 | 1,00 | up   |
| 6694102 | 7198690 | 1372542 | phosphodiesterase 5A, cGMP-specific             | Pde5a | 171115 | 1,26 | up   |
| 6711498 | 7198690 | 1372545 | phosphodiesterase 5A, cGMP-specific             | Pde5a | 171115 | 1,07 | up   |
| 5672463 | 7171041 | 1302317 | phosphodiesterase 6A, cGMP-specific, rod, alpha | Pde6a | 307401 | 1,19 | down |
| 5744844 | 7171041 | 1302328 | phosphodiesterase 6A, cGMP-specific, rod, alpha | Pde6a | 307401 | 1,48 | up   |
| 5854032 | 7171041 | 1302311 | phosphodiesterase 6A, cGMP-specific, rod, alpha | Pde6a | 307401 | 1,16 | down |
| 5872439 | 7171041 | 1302323 | phosphodiesterase 6A, cGMP-specific, rod, alpha | Pde6a | 307401 | 1,55 | down |
| 5932979 | 7171041 | 1302308 | phosphodiesterase 6A, cGMP-specific, rod, alpha | Pde6a | 307401 | 1,16 | up   |
| 5937009 | 7171041 | 1302319 | phosphodiesterase 6A, cGMP-specific, rod, alpha | Pde6a | 307401 | 1,06 | down |
| 5980078 | 7171041 | 1302337 | phosphodiesterase 6A, cGMP-specific, rod, alpha | Pde6a | 307401 | 1,02 | down |
| 6027690 | 7171041 | 1302318 | phosphodiesterase 6A, cGMP-specific, rod, alpha | Pde6a | 307401 | 1,04 | up   |
| 6039593 | 7171041 | 1302327 | phosphodiesterase 6A, cGMP-specific, rod, alpha | Pde6a | 307401 | 1,22 | down |
| 6071184 | 7171041 | 1302332 | phosphodiesterase 6A, cGMP-specific, rod, alpha | Pde6a | 307401 | 1,06 | up   |
| 6105390 | 7171041 | 1302324 | phosphodiesterase 6A, cGMP-specific, rod, alpha | Pde6a | 307401 | 1,24 | up   |
| 6146721 | 7171041 | 1302313 | phosphodiesterase 6A, cGMP-specific, rod, alpha | Pde6a | 307401 | 1,15 | up   |
| 6300233 | 7171041 | 1302320 | phosphodiesterase 6A, cGMP-specific, rod, alpha | Pde6a | 307401 | 1,14 | down |
| 6368165 | 7171041 | 1302335 | phosphodiesterase 6A, cGMP-specific, rod, alpha | Pde6a | 307401 | 1,00 | up   |
| 6375967 | 7171041 | 1302333 | phosphodiesterase 6A, cGMP-specific, rod, alpha | Pde6a | 307401 | 2,60 | up   |
| 6385692 | 7171041 | 1302316 | phosphodiesterase 6A, cGMP-specific, rod, alpha | Pde6a | 307401 | 1,09 | down |
| 6423925 | 7171041 | 1302322 | phosphodiesterase 6A, cGMP-specific, rod, alpha | Pde6a | 307401 | 1,49 | up   |
| 6516377 | 7171041 | 1302325 | phosphodiesterase 6A, cGMP-specific, rod, alpha | Pde6a | 307401 | 1,17 | down |
| 6536098 | 7171041 | 1302308 | phosphodiesterase 6A, cGMP-specific, rod, alpha | Pde6a | 307401 | 1,26 | down |
| 6580426 | 7171041 | 1302310 | phosphodiesterase 6A, cGMP-specific, rod, alpha | Pde6a | 307401 | 1,10 | down |
| 6585066 | 7171041 | 1302326 | phosphodiesterase 6A, cGMP-specific, rod, alpha | Pde6a | 307401 | 1,01 | up   |
| 6641894 | 7171041 | 1302312 | phosphodiesterase 6A, cGMP-specific, rod, alpha | Pde6a | 307401 | 1,03 | up   |
| 6708337 | 7171041 | 1302334 | phosphodiesterase 6A, cGMP-specific, rod, alpha | Pde6a | 307401 | 1,04 | up   |
| 5655109 | 7122486 | 1183426 | phosphodiesterase 6B, cGMP-specific, rod, beta  | Pde6b | 289878 | 1,57 | down |
| 5730227 | 7122486 | 1183422 | phosphodiesterase 6B, cGMP-specific, rod, beta  | Pde6b | 289878 | 1,05 | up   |
| 5816346 | 7122486 | 1183428 | phosphodiesterase 6B, cGMP-specific, rod, beta  | Pde6b | 289878 | 1,32 | up   |
| 5835999 | 7122486 | 1183434 | phosphodiesterase 6B, cGMP-specific, rod, beta  | Pde6b | 289878 | 1,10 | up   |
| 5849751 | 7122486 | 1183418 | phosphodiesterase 6B, cGMP-specific, rod, beta  | Pde6b | 289878 | 1,25 | down |
| 5887373 | 7122486 | 1183415 | phosphodiesterase 6B, cGMP-specific, rod, beta  | Pde6b | 289878 | 1,04 | down |
| 5922444 | 7122486 | 1183433 | phosphodiesterase 6B, cGMP-specific, rod, beta  | Pde6b | 289878 | 1,10 | down |
| 5990681 | 7122486 | 1183439 | phosphodiesterase 6B, cGMP-specific, rod, beta  | Pde6b | 289878 | 1,06 | down |
| 6080844 | 7122486 | 1183421 | phosphodiesterase 6B, cGMP-specific, rod, beta  | Pde6b | 289878 | 1,01 | down |
| 6107297 | 7122486 | 1183430 | phosphodiesterase 6B, cGMP-specific, rod, beta  | Pde6b | 289878 | 1,12 | down |
| 6120525 | 7122486 | 1183425 | phosphodiesterase 6B, cGMP-specific, rod, beta  | Pde6b | 289878 | 1,31 | down |
| 6123865 | 7122486 | 1183420 | phosphodiesterase 6B, cGMP-specific, rod, beta  | Pde6b | 289878 | 2,34 | up   |
| 6183933 | 7122486 | 1183419 | phosphodiesterase 6B, cGMP-specific, rod, beta  | Pde6b | 289878 | 1,46 | up   |
| 6277133 | 7122486 | 1183417 | phosphodiesterase 6B, cGMP-specific, rod, beta  | Pde6b | 289878 | 1,10 | up   |
| 6283918 | 7122486 | 1183431 | phosphodiesterase 6B, cGMP-specific, rod, beta  | Pde6b | 289878 | 1,01 | up   |
| 6324493 | 7122486 | 1183427 | phosphodiesterase 6B, cGMP-specific, rod, beta  | Pde6b | 289878 | 1,05 | up   |
| 6353895 | 7122486 | 1183413 | phosphodiesterase 6B, cGMP-specific, rod, beta  | Pde6b | 289878 | 1,41 | down |
| 6377450 | 7122486 | 1183413 | phosphodiesterase 6B, cGMP-specific, rod, beta  | Pde6b | 289878 | 1,15 | down |
| 6416215 | 7122486 | 1183418 | phosphodiesterase 6B, cGMP-specific, rod, beta  | Pde6b | 289878 | 1,06 | down |
| 6495358 | 7122486 | 1183429 | phosphodiesterase 6B, cGMP-specific, rod, beta  | Pde6b | 289878 | 1,05 | up   |
| 6517321 | 7122486 | 1183421 | phosphodiesterase 6B, cGMP-specific, rod, beta  | Pde6b | 289878 | 1,49 | down |

|         |         |         |                                                     |       |        |      |      |
|---------|---------|---------|-----------------------------------------------------|-------|--------|------|------|
| 6545544 | 7122486 | 1183424 | phosphodiesterase 6B, cGMP-specific, rod, beta      | Pde6b | 289878 | 1,04 | up   |
| 6581953 | 7122486 | 1183425 | phosphodiesterase 6B, cGMP-specific, rod, beta      | Pde6b | 289878 | 1,28 | down |
| 6591262 | 7122486 | 1183423 | phosphodiesterase 6B, cGMP-specific, rod, beta      | Pde6b | 289878 | 1,08 | down |
| 5631207 | 7217492 | 1416699 | phosphodiesterase 9A                                | Pde9a | 191569 | 1,33 | up   |
| 5638826 | 7217492 | 1416709 | phosphodiesterase 9A                                | Pde9a | 191569 | 1,35 | up   |
| 5678330 | 7217492 | 1416701 | phosphodiesterase 9A                                | Pde9a | 191569 | 1,13 | down |
| 5790860 | 7217492 | 1416703 | phosphodiesterase 9A                                | Pde9a | 191569 | 1,12 | down |
| 5897119 | 7217492 | 1416705 | phosphodiesterase 9A                                | Pde9a | 191569 | 1,54 | down |
| 5905874 | 7217492 | 1416715 | phosphodiesterase 9A                                | Pde9a | 191569 | 1,16 | up   |
| 6054226 | 7217492 | 1416700 | phosphodiesterase 9A                                | Pde9a | 191569 | 1,33 | down |
| 6067245 | 7217492 | 1416712 | phosphodiesterase 9A                                | Pde9a | 191569 | 1,68 | up   |
| 6089409 | 7217492 | 1416708 | phosphodiesterase 9A                                | Pde9a | 191569 | 1,46 | down |
| 6093972 | 7217492 | 1416713 | phosphodiesterase 9A                                | Pde9a | 191569 | 1,31 | down |
| 6104656 | 7217492 | 1416711 | phosphodiesterase 9A                                | Pde9a | 191569 | 1,39 | up   |
| 6123510 | 7217492 | 1416714 | phosphodiesterase 9A                                | Pde9a | 191569 | 1,15 | down |
| 6302154 | 7217492 | 1416710 | phosphodiesterase 9A                                | Pde9a | 191569 | 1,76 | down |
| 6329168 | 7217492 | 1416700 | phosphodiesterase 9A                                | Pde9a | 191569 | 1,25 | down |
| 6334758 | 7217492 | 1416716 | phosphodiesterase 9A                                | Pde9a | 191569 | 1,18 | up   |
| 6371757 | 7217492 | 1416706 | phosphodiesterase 9A                                | Pde9a | 191569 | 1,19 | down |
| 6487917 | 7217492 | 1416702 | phosphodiesterase 9A                                | Pde9a | 191569 | 1,11 | down |
| 6575072 | 7217492 | 1416704 | phosphodiesterase 9A                                | Pde9a | 191569 | 2,06 | up   |
| 6638398 | 7217492 | 1416707 | phosphodiesterase 9A                                | Pde9a | 191569 | 1,02 | down |
| 6707735 | 7217492 | 1416699 | phosphodiesterase 9A                                | Pde9a | 191569 | 1,14 | up   |
| 5816125 | 7131889 | 1206090 | phosphoenolpyruvate carboxykinase 2 (mitochondrial) | Pck2  | 361042 | 1,02 | up   |
| 5820473 | 7131889 | 1206090 | phosphoenolpyruvate carboxykinase 2 (mitochondrial) | Pck2  | 361042 | 1,21 | down |
| 5871722 | 7131889 | 1206090 | phosphoenolpyruvate carboxykinase 2 (mitochondrial) | Pck2  | 361042 | 1,08 | up   |
| 5889312 | 7131889 | 1206088 | phosphoenolpyruvate carboxykinase 2 (mitochondrial) | Pck2  | 361042 | 1,42 | up   |
| 5991974 | 7131889 | 1206091 | phosphoenolpyruvate carboxykinase 2 (mitochondrial) | Pck2  | 361042 | 1,23 | down |
| 6096146 | 7131889 | 1206092 | phosphoenolpyruvate carboxykinase 2 (mitochondrial) | Pck2  | 361042 | 1,04 | down |
| 6316117 | 7131889 | 1206090 | phosphoenolpyruvate carboxykinase 2 (mitochondrial) | Pck2  | 361042 | 1,17 | down |
| 6320179 | 7131889 | 1206087 | phosphoenolpyruvate carboxykinase 2 (mitochondrial) | Pck2  | 361042 | 2,03 | up   |
| 6327821 | 7131889 | 1206090 | phosphoenolpyruvate carboxykinase 2 (mitochondrial) | Pck2  | 361042 | 1,01 | down |
| 6330551 | 7131889 | 1206089 | phosphoenolpyruvate carboxykinase 2 (mitochondrial) | Pck2  | 361042 | 1,13 | down |
| 6354011 | 7131889 | 1206093 | phosphoenolpyruvate carboxykinase 2 (mitochondrial) | Pck2  | 361042 | 1,06 | down |
| 6540593 | 7131889 | 1206093 | phosphoenolpyruvate carboxykinase 2 (mitochondrial) | Pck2  | 361042 | 1,12 | down |
| 6701603 | 7131889 | 1206088 | phosphoenolpyruvate carboxykinase 2 (mitochondrial) | Pck2  | 361042 | 1,21 | down |
| 5656269 | 7059716 | 1030821 | phosphofurin acidic cluster sorting protein 1       | Pacs1 | 171444 | 1,18 | down |
| 5673417 | 7059716 | 1030822 | phosphofurin acidic cluster sorting protein 1       | Pacs1 | 171444 | 1,13 | down |
| 5692167 | 7059716 | 1030819 | phosphofurin acidic cluster sorting protein 1       | Pacs1 | 171444 | 1,07 | up   |
| 5740577 | 7059716 | 1030814 | phosphofurin acidic cluster sorting protein 1       | Pacs1 | 171444 | 1,24 | up   |
| 5802250 | 7059716 | 1030823 | phosphofurin acidic cluster sorting protein 1       | Pacs1 | 171444 | 1,29 | up   |
| 5808108 | 7059716 | 1030832 | phosphofurin acidic cluster sorting protein 1       | Pacs1 | 171444 | 1,00 | down |
| 5812572 | 7059716 | 1030824 | phosphofurin acidic cluster sorting protein 1       | Pacs1 | 171444 | 1,12 | up   |
| 5840751 | 7059716 | 1030815 | phosphofurin acidic cluster sorting protein 1       | Pacs1 | 171444 | 1,20 | up   |
| 5886426 | 7059716 | 1030834 | phosphofurin acidic cluster sorting protein 1       | Pacs1 | 171444 | 1,26 | down |
| 5931176 | 7059716 | 1030828 | phosphofurin acidic cluster sorting protein 1       | Pacs1 | 171444 | 1,03 | down |
| 5938099 | 7059716 | 1030830 | phosphofurin acidic cluster sorting protein 1       | Pacs1 | 171444 | 1,01 | up   |
| 5960773 | 7059716 | 1030834 | phosphofurin acidic cluster sorting protein 1       | Pacs1 | 171444 | 1,27 | up   |
| 6046712 | 7059716 | 1030816 | phosphofurin acidic cluster sorting protein 1       | Pacs1 | 171444 | 1,11 | down |
| 6079697 | 7059716 | 1030835 | phosphofurin acidic cluster sorting protein 1       | Pacs1 | 171444 | 1,12 | down |
| 6203348 | 7059716 | 1030817 | phosphofurin acidic cluster sorting protein 1       | Pacs1 | 171444 | 1,03 | down |
| 6267478 | 7059716 | 1030826 | phosphofurin acidic cluster sorting protein 1       | Pacs1 | 171444 | 1,20 | down |
| 6270844 | 7059716 | 1030831 | phosphofurin acidic cluster sorting protein 1       | Pacs1 | 171444 | 1,11 | up   |
| 6287242 | 7059716 | 1030823 | phosphofurin acidic cluster sorting protein 1       | Pacs1 | 171444 | 1,02 | up   |
| 6296149 | 7059716 | 1030813 | phosphofurin acidic cluster sorting protein 1       | Pacs1 | 171444 | 1,15 | up   |
| 6339924 | 7059716 | 1030827 | phosphofurin acidic cluster sorting protein 1       | Pacs1 | 171444 | 1,07 | up   |

|         |         |         |                                                 |          |        |      |      |
|---------|---------|---------|-------------------------------------------------|----------|--------|------|------|
| 6408459 | 7059716 | 1030812 | phosphofurin acidic cluster sorting protein 1   | Pacs1    | 171444 | 1,08 | down |
| 6438496 | 7059716 | 1030823 | phosphofurin acidic cluster sorting protein 1   | Pacs1    | 171444 | 1,06 | down |
| 6482869 | 7059716 | 1030810 | phosphofurin acidic cluster sorting protein 1   | Pacs1    | 171444 | 2,76 | down |
| 6556212 | 7059716 | 1030811 | phosphofurin acidic cluster sorting protein 1   | Pacs1    | 171444 | 1,00 | down |
| 6560405 | 7059716 | 1030829 | phosphofurin acidic cluster sorting protein 1   | Pacs1    | 171444 | 1,06 | up   |
| 6628531 | 7059716 | 1030825 | phosphofurin acidic cluster sorting protein 1   | Pacs1    | 171444 | 1,05 | up   |
| 6680675 | 7059716 | 1030820 | phosphofurin acidic cluster sorting protein 1   | Pacs1    | 171444 | 1,00 | down |
| 6690494 | 7059716 | 1030818 | phosphofurin acidic cluster sorting protein 1   | Pacs1    | 171444 | 1,03 | up   |
| 6714502 | 7059716 | 1030835 | phosphofurin acidic cluster sorting protein 1   | Pacs1    | 171444 | 1,33 | down |
| 5660530 | 7211874 | 1403017 | phosphoglycerate dehydrogenase                  | Phgdh    | 58835  | 1,23 | down |
| 5781709 | 7211874 | 1403014 | phosphoglycerate dehydrogenase                  | Phgdh    | 58835  | 1,09 | down |
| 5815062 | 7211874 | 1403018 | phosphoglycerate dehydrogenase                  | Phgdh    | 58835  | 1,12 | down |
| 5852684 | 7211874 | 1403020 | phosphoglycerate dehydrogenase                  | Phgdh    | 58835  | 1,27 | up   |
| 5856737 | 7211874 | 1403012 | phosphoglycerate dehydrogenase                  | Phgdh    | 58835  | 1,30 | down |
| 6054905 | 7211874 | 1403018 | phosphoglycerate dehydrogenase                  | Phgdh    | 58835  | 1,16 | down |
| 6084361 | 7211874 | 1403009 | phosphoglycerate dehydrogenase                  | Phgdh    | 58835  | 3,38 | down |
| 6307517 | 7211874 | 1403011 | phosphoglycerate dehydrogenase                  | Phgdh    | 58835  | 1,08 | up   |
| 6369656 | 7211874 | 1403016 | phosphoglycerate dehydrogenase                  | Phgdh    | 58835  | 1,56 | down |
| 6399333 | 7211874 | 1403019 | phosphoglycerate dehydrogenase                  | Phgdh    | 58835  | 1,49 | up   |
| 6426795 | 7211874 | 1403021 | phosphoglycerate dehydrogenase                  | Phgdh    | 58835  | 1,76 | up   |
| 6490178 | 7211874 | 1403007 | phosphoglycerate dehydrogenase                  | Phgdh    | 58835  | 1,24 | up   |
| 6521545 | 7211874 | 1403008 | phosphoglycerate dehydrogenase                  | Phgdh    | 58835  | 1,21 | down |
| 6539831 | 7211874 | 1403015 | phosphoglycerate dehydrogenase                  | Phgdh    | 58835  | 1,18 | up   |
| 6572578 | 7211874 | 1403010 | phosphoglycerate dehydrogenase                  | Phgdh    | 58835  | 1,30 | down |
| 6626345 | 7211874 | 1403020 | phosphoglycerate dehydrogenase                  | Phgdh    | 58835  | 1,04 | down |
| 6717582 | 7211874 | 1403013 | phosphoglycerate dehydrogenase                  | Phgdh    | 58835  | 1,18 | down |
| 5850016 | 7068942 | 1053393 | phosphoinositide-3-kinase, regulatory subunit 5 | Pik3r5   | 497931 | 1,08 | down |
| 5955960 | 7068942 | 1053393 | phosphoinositide-3-kinase, regulatory subunit 5 | Pik3r5   | 497931 | 1,01 | down |
| 5667663 | 7288686 | 1593582 | phospholipase A2, activating protein            | Plaa     | 116645 | 1,04 | down |
| 5719889 | 7288686 | 1593580 | phospholipase A2, activating protein            | Plaa     | 116645 | 1,00 | up   |
| 5833159 | 7288686 | 1593572 | phospholipase A2, activating protein            | Plaa     | 116645 | 1,06 | up   |
| 5860326 | 7288686 | 1593576 | phospholipase A2, activating protein            | Plaa     | 116645 | 1,07 | down |
| 5974823 | 7288686 | 1593581 | phospholipase A2, activating protein            | Plaa     | 116645 | 1,21 | up   |
| 6145623 | 7288686 | 1593571 | phospholipase A2, activating protein            | Plaa     | 116645 | 2,63 | down |
| 6179135 | 7288686 | 1593576 | phospholipase A2, activating protein            | Plaa     | 116645 | 1,25 | down |
| 6224947 | 7288686 | 1593571 | phospholipase A2, activating protein            | Plaa     | 116645 | 1,06 | up   |
| 6252645 | 7288686 | 1593571 | phospholipase A2, activating protein            | Plaa     | 116645 | 1,25 | down |
| 6418701 | 7288686 | 1593583 | phospholipase A2, activating protein            | Plaa     | 116645 | 1,04 | up   |
| 6445497 | 7288686 | 1593578 | phospholipase A2, activating protein            | Plaa     | 116645 | 1,00 | up   |
| 6534049 | 7288686 | 1593573 | phospholipase A2, activating protein            | Plaa     | 116645 | 1,17 | up   |
| 6639706 | 7288686 | 1593579 | phospholipase A2, activating protein            | Plaa     | 116645 | 1,02 | down |
| 6661775 | 7288686 | 1593575 | phospholipase A2, activating protein            | Plaa     | 116645 | 1,18 | down |
| 6724768 | 7288686 | 1593577 | phospholipase A2, activating protein            | Plaa     | 116645 | 1,01 | up   |
| 6735569 | 7288686 | 1593574 | phospholipase A2, activating protein            | Plaa     | 116645 | 1,03 | down |
| 5778263 | 7370001 | 1795758 | phospholipase A2, group XIIB                    | Pla2g12b | 367415 | 2,13 | down |
| 5976505 | 7370001 | 1795765 | phospholipase A2, group XIIB                    | Pla2g12b | 367415 | 1,04 | up   |
| 6185954 | 7370001 | 1795758 | phospholipase A2, group XIIB                    | Pla2g12b | 367415 | 1,18 | down |
| 6319744 | 7370001 | 1795760 | phospholipase A2, group XIIB                    | Pla2g12b | 367415 | 1,03 | down |
| 6385264 | 7370001 | 1795762 | phospholipase A2, group XIIB                    | Pla2g12b | 367415 | 1,33 | up   |
| 5619910 | 7303805 | 1632088 | phospholipase B                                 | Phlpb    | 192259 | 1,04 | down |
| 5629184 | 7303805 | 1632105 | phospholipase B                                 | Phlpb    | 192259 | 2,10 | down |
| 5631713 | 7303805 | 1632097 | phospholipase B                                 | Phlpb    | 192259 | 1,14 | up   |
| 5678278 | 7303805 | 1632103 | phospholipase B                                 | Phlpb    | 192259 | 1,02 | down |
| 5694519 | 7303805 | 1632109 | phospholipase B                                 | Phlpb    | 192259 | 1,02 | down |
| 5700128 | 7303805 | 1632068 | phospholipase B                                 | Phlpb    | 192259 | 1,42 | down |
| 5703098 | 7303805 | 1632078 | phospholipase B                                 | Phlpb    | 192259 | 1,10 | down |

|         |         |         |                  |       |        |      |      |
|---------|---------|---------|------------------|-------|--------|------|------|
| 5706081 | 7303805 | 1632096 | phospholipase B  | Phlpb | 192259 | 2,82 | up   |
| 5707009 | 7303805 | 1632072 | phospholipase B  | Phlpb | 192259 | 1,03 | up   |
| 5723270 | 7303805 | 1632063 | phospholipase B  | Phlpb | 192259 | 1,05 | up   |
| 5731881 | 7303805 | 1632116 | phospholipase B  | Phlpb | 192259 | 1,46 | up   |
| 5740589 | 7303805 | 1632110 | phospholipase B  | Phlpb | 192259 | 1,78 | down |
| 5792817 | 7303805 | 1632089 | phospholipase B  | Phlpb | 192259 | 1,11 | down |
| 5793291 | 7303805 | 1632070 | phospholipase B  | Phlpb | 192259 | 1,19 | up   |
| 5823338 | 7303805 | 1632086 | phospholipase B  | Phlpb | 192259 | 1,16 | up   |
| 5915432 | 7303805 | 1632091 | phospholipase B  | Phlpb | 192259 | 1,61 | up   |
| 5922639 | 7303805 | 1632063 | phospholipase B  | Phlpb | 192259 | 1,14 | down |
| 5923631 | 7303805 | 1632076 | phospholipase B  | Phlpb | 192259 | 2,17 | down |
| 5942921 | 7303805 | 1632067 | phospholipase B  | Phlpb | 192259 | 1,19 | up   |
| 5949745 | 7303805 | 1632112 | phospholipase B  | Phlpb | 192259 | 1,11 | down |
| 5970961 | 7303805 | 1632085 | phospholipase B  | Phlpb | 192259 | 1,35 | down |
| 6013552 | 7303805 | 1632115 | phospholipase B  | Phlpb | 192259 | 1,00 | up   |
| 6049671 | 7303805 | 1632081 | phospholipase B  | Phlpb | 192259 | 1,02 | up   |
| 6053904 | 7303805 | 1632080 | phospholipase B  | Phlpb | 192259 | 1,14 | up   |
| 6061164 | 7303805 | 1632074 | phospholipase B  | Phlpb | 192259 | 1,76 | up   |
| 6122954 | 7303805 | 1632066 | phospholipase B  | Phlpb | 192259 | 1,58 | up   |
| 6137092 | 7303805 | 1632064 | phospholipase B  | Phlpb | 192259 | 1,52 | down |
| 6146892 | 7303805 | 1632093 | phospholipase B  | Phlpb | 192259 | 1,66 | down |
| 6186302 | 7303805 | 1632075 | phospholipase B  | Phlpb | 192259 | 1,59 | down |
| 6210127 | 7303805 | 1632073 | phospholipase B  | Phlpb | 192259 | 1,26 | up   |
| 6218325 | 7303805 | 1632102 | phospholipase B  | Phlpb | 192259 | 1,33 | up   |
| 6221666 | 7303805 | 1632106 | phospholipase B  | Phlpb | 192259 | 1,05 | down |
| 6253417 | 7303805 | 1632099 | phospholipase B  | Phlpb | 192259 | 1,24 | down |
| 6269941 | 7303805 | 1632095 | phospholipase B  | Phlpb | 192259 | 1,65 | down |
| 6281957 | 7303805 | 1632083 | phospholipase B  | Phlpb | 192259 | 1,05 | up   |
| 6323458 | 7303805 | 1632100 | phospholipase B  | Phlpb | 192259 | 1,12 | down |
| 6412407 | 7303805 | 1632108 | phospholipase B  | Phlpb | 192259 | 1,15 | down |
| 6422625 | 7303805 | 1632065 | phospholipase B  | Phlpb | 192259 | 1,25 | up   |
| 6425650 | 7303805 | 1632071 | phospholipase B  | Phlpb | 192259 | 1,25 | down |
| 6428530 | 7303805 | 1632084 | phospholipase B  | Phlpb | 192259 | 1,31 | up   |
| 6431143 | 7303805 | 1632090 | phospholipase B  | Phlpb | 192259 | 1,11 | up   |
| 6448546 | 7303805 | 1632113 | phospholipase B  | Phlpb | 192259 | 1,17 | up   |
| 6459068 | 7303805 | 1632114 | phospholipase B  | Phlpb | 192259 | 1,17 | up   |
| 6496619 | 7303805 | 1632111 | phospholipase B  | Phlpb | 192259 | 1,15 | up   |
| 6520816 | 7303805 | 1632087 | phospholipase B  | Phlpb | 192259 | 1,34 | up   |
| 6545176 | 7303805 | 1632101 | phospholipase B  | Phlpb | 192259 | 1,30 | down |
| 6651033 | 7303805 | 1632082 | phospholipase B  | Phlpb | 192259 | 1,09 | down |
| 6655129 | 7303805 | 1632079 | phospholipase B  | Phlpb | 192259 | 1,04 | down |
| 6667723 | 7303805 | 1632092 | phospholipase B  | Phlpb | 192259 | 1,46 | up   |
| 6698018 | 7303805 | 1632104 | phospholipase B  | Phlpb | 192259 | 1,40 | up   |
| 6703156 | 7303805 | 1632094 | phospholipase B  | Phlpb | 192259 | 1,02 | up   |
| 6731246 | 7303805 | 1632077 | phospholipase B  | Phlpb | 192259 | 1,20 | down |
| 6733497 | 7303805 | 1632069 | phospholipase B  | Phlpb | 192259 | 1,10 | down |
| 6744568 | 7303805 | 1632107 | phospholipase B  | Phlpb | 192259 | 1,34 | down |
| 5644603 | 7192686 | 1357075 | phospholipase D1 | Pld1  | 25096  | 1,04 | down |
| 5644924 | 7192686 | 1357069 | phospholipase D1 | Pld1  | 25096  | 1,00 | up   |
| 5661654 | 7192686 | 1357060 | phospholipase D1 | Pld1  | 25096  | 1,42 | down |
| 5665870 | 7192686 | 1357053 | phospholipase D1 | Pld1  | 25096  | 1,15 | down |
| 5792004 | 7192686 | 1357058 | phospholipase D1 | Pld1  | 25096  | 1,04 | down |
| 5799568 | 7192686 | 1357067 | phospholipase D1 | Pld1  | 25096  | 1,43 | down |
| 5800153 | 7192686 | 1357052 | phospholipase D1 | Pld1  | 25096  | 1,10 | up   |
| 5827827 | 7192686 | 1357077 | phospholipase D1 | Pld1  | 25096  | 1,22 | down |
| 5861102 | 7192686 | 1357072 | phospholipase D1 | Pld1  | 25096  | 1,02 | down |

|         |         |         |                           |        |        |      |      |
|---------|---------|---------|---------------------------|--------|--------|------|------|
| 5879492 | 7192686 | 1357061 | phospholipase D1          | Pld1   | 25096  | 1,20 | up   |
| 5938019 | 7192686 | 1357053 | phospholipase D1          | Pld1   | 25096  | 1,25 | up   |
| 5998127 | 7192686 | 1357056 | phospholipase D1          | Pld1   | 25096  | 2,08 | down |
| 6004603 | 7192686 | 1357054 | phospholipase D1          | Pld1   | 25096  | 1,16 | up   |
| 6110405 | 7192686 | 1357057 | phospholipase D1          | Pld1   | 25096  | 1,93 | down |
| 6166334 | 7192686 | 1357065 | phospholipase D1          | Pld1   | 25096  | 1,06 | up   |
| 6189213 | 7192686 | 1357074 | phospholipase D1          | Pld1   | 25096  | 1,08 | up   |
| 6193848 | 7192686 | 1357059 | phospholipase D1          | Pld1   | 25096  | 1,07 | up   |
| 6195614 | 7192686 | 1357053 | phospholipase D1          | Pld1   | 25096  | 1,18 | up   |
| 6200903 | 7192686 | 1357066 | phospholipase D1          | Pld1   | 25096  | 1,30 | down |
| 6227978 | 7192686 | 1357064 | phospholipase D1          | Pld1   | 25096  | 1,07 | down |
| 6232032 | 7192686 | 1357071 | phospholipase D1          | Pld1   | 25096  | 1,26 | up   |
| 6244803 | 7192686 | 1357076 | phospholipase D1          | Pld1   | 25096  | 1,08 | down |
| 6317333 | 7192686 | 1357067 | phospholipase D1          | Pld1   | 25096  | 1,64 | up   |
| 6375507 | 7192686 | 1357054 | phospholipase D1          | Pld1   | 25096  | 1,22 | down |
| 6386942 | 7192686 | 1357080 | phospholipase D1          | Pld1   | 25096  | 1,04 | up   |
| 6390091 | 7192686 | 1357068 | phospholipase D1          | Pld1   | 25096  | 1,32 | down |
| 6440657 | 7192686 | 1357053 | phospholipase D1          | Pld1   | 25096  | 1,09 | up   |
| 6457293 | 7192686 | 1357070 | phospholipase D1          | Pld1   | 25096  | 1,10 | up   |
| 6461290 | 7192686 | 1357063 | phospholipase D1          | Pld1   | 25096  | 1,27 | up   |
| 6466272 | 7192686 | 1357067 | phospholipase D1          | Pld1   | 25096  | 1,88 | down |
| 6501399 | 7192686 | 1357073 | phospholipase D1          | Pld1   | 25096  | 1,20 | down |
| 6570708 | 7192686 | 1357055 | phospholipase D1          | Pld1   | 25096  | 1,02 | down |
| 6701616 | 7192686 | 1357079 | phospholipase D1          | Pld1   | 25096  | 1,18 | up   |
| 6719106 | 7192686 | 1357078 | phospholipase D1          | Pld1   | 25096  | 1,11 | up   |
| 6723422 | 7192686 | 1357062 | phospholipase D1          | Pld1   | 25096  | 1,23 | up   |
| 6728127 | 7192686 | 1357068 | phospholipase D1          | Pld1   | 25096  | 1,27 | down |
| 5669761 | 7069249 | 1054132 | phospholipase D2          | Pld2   | 25097  | 1,17 | up   |
| 5831468 | 7069249 | 1054113 | phospholipase D2          | Pld2   | 25097  | 1,10 | up   |
| 5843529 | 7069249 | 1054137 | phospholipase D2          | Pld2   | 25097  | 1,41 | down |
| 5865708 | 7069249 | 1054118 | phospholipase D2          | Pld2   | 25097  | 1,08 | up   |
| 5889213 | 7069249 | 1054135 | phospholipase D2          | Pld2   | 25097  | 1,34 | up   |
| 5946052 | 7069249 | 1054126 | phospholipase D2          | Pld2   | 25097  | 1,08 | up   |
| 5968724 | 7069249 | 1054119 | phospholipase D2          | Pld2   | 25097  | 1,26 | down |
| 5996236 | 7069249 | 1054114 | phospholipase D2          | Pld2   | 25097  | 1,14 | down |
| 6006736 | 7069249 | 1054131 | phospholipase D2          | Pld2   | 25097  | 1,17 | down |
| 6060815 | 7069249 | 1054122 | phospholipase D2          | Pld2   | 25097  | 1,02 | up   |
| 6093249 | 7069249 | 1054127 | phospholipase D2          | Pld2   | 25097  | 1,35 | up   |
| 6103436 | 7069249 | 1054128 | phospholipase D2          | Pld2   | 25097  | 1,03 | down |
| 6137283 | 7069249 | 1054125 | phospholipase D2          | Pld2   | 25097  | 1,01 | up   |
| 6138822 | 7069249 | 1054115 | phospholipase D2          | Pld2   | 25097  | 1,25 | down |
| 6140230 | 7069249 | 1054124 | phospholipase D2          | Pld2   | 25097  | 1,61 | up   |
| 6249994 | 7069249 | 1054121 | phospholipase D2          | Pld2   | 25097  | 1,04 | up   |
| 6285670 | 7069249 | 1054116 | phospholipase D2          | Pld2   | 25097  | 1,39 | up   |
| 6358363 | 7069249 | 1054133 | phospholipase D2          | Pld2   | 25097  | 1,05 | down |
| 6407857 | 7069249 | 1054136 | phospholipase D2          | Pld2   | 25097  | 1,22 | up   |
| 6451106 | 7069249 | 1054127 | phospholipase D2          | Pld2   | 25097  | 1,21 | up   |
| 6491313 | 7069249 | 1054117 | phospholipase D2          | Pld2   | 25097  | 1,38 | down |
| 6539879 | 7069249 | 1054129 | phospholipase D2          | Pld2   | 25097  | 1,00 | down |
| 6554508 | 7069249 | 1054134 | phospholipase D2          | Pld2   | 25097  | 1,26 | up   |
| 6597561 | 7069249 | 1054113 | phospholipase D2          | Pld2   | 25097  | 1,09 | down |
| 6603681 | 7069249 | 1054123 | phospholipase D2          | Pld2   | 25097  | 1,03 | down |
| 6671586 | 7069249 | 1054120 | phospholipase D2          | Pld2   | 25097  | 2,42 | down |
| 6674700 | 7069249 | 1054130 | phospholipase D2          | Pld2   | 25097  | 1,06 | up   |
| 5661863 | 7339147 | 1717722 | phospholipid scramblase 1 | Plscr1 | 117540 | 2,30 | down |
| 5788177 | 7339147 | 1717724 | phospholipid scramblase 1 | Plscr1 | 117540 | 1,13 | down |

|         |         |         |                                                              |         |        |      |      |
|---------|---------|---------|--------------------------------------------------------------|---------|--------|------|------|
| 5798699 | 7339147 | 1717726 | phospholipid scramblase 1                                    | Plscr1  | 117540 | 1,35 | up   |
| 5804092 | 7339147 | 1717720 | phospholipid scramblase 1                                    | Plscr1  | 117540 | 1,25 | up   |
| 6137465 | 7339147 | 1717727 | phospholipid scramblase 1                                    | Plscr1  | 117540 | 1,09 | down |
| 6170281 | 7339147 | 1717725 | phospholipid scramblase 1                                    | Plscr1  | 117540 | 1,27 | up   |
| 6246986 | 7339147 | 1717721 | phospholipid scramblase 1                                    | Plscr1  | 117540 | 1,38 | down |
| 6414831 | 7339147 | 1717723 | phospholipid scramblase 1                                    | Plscr1  | 117540 | 1,85 | up   |
| 6563995 | 7339147 | 1717721 | phospholipid scramblase 1                                    | Plscr1  | 117540 | 2,63 | down |
| 6737906 | 7339147 | 1717719 | phospholipid scramblase 1                                    | Plscr1  | 117540 | 1,38 | down |
| 5631438 | 7078326 | 1075899 | phosphoribosyl pyrophosphate synthetase-associated protein 2 | Prpsap2 | 117272 | 1,05 | down |
| 5657114 | 7078326 | 1075902 | phosphoribosyl pyrophosphate synthetase-associated protein 2 | Prpsap2 | 117272 | 1,05 | up   |
| 5692304 | 7078326 | 1075901 | phosphoribosyl pyrophosphate synthetase-associated protein 2 | Prpsap2 | 117272 | 1,09 | down |
| 5728130 | 7078326 | 1075896 | phosphoribosyl pyrophosphate synthetase-associated protein 2 | Prpsap2 | 117272 | 1,15 | down |
| 5890349 | 7078326 | 1075904 | phosphoribosyl pyrophosphate synthetase-associated protein 2 | Prpsap2 | 117272 | 1,15 | up   |
| 5997983 | 7078326 | 1075904 | phosphoribosyl pyrophosphate synthetase-associated protein 2 | Prpsap2 | 117272 | 1,13 | up   |
| 6001937 | 7078326 | 1075897 | phosphoribosyl pyrophosphate synthetase-associated protein 2 | Prpsap2 | 117272 | 1,01 | up   |
| 6097754 | 7078326 | 1075898 | phosphoribosyl pyrophosphate synthetase-associated protein 2 | Prpsap2 | 117272 | 1,39 | up   |
| 6252702 | 7078326 | 1075895 | phosphoribosyl pyrophosphate synthetase-associated protein 2 | Prpsap2 | 117272 | 1,27 | up   |
| 6259155 | 7078326 | 1075900 | phosphoribosyl pyrophosphate synthetase-associated protein 2 | Prpsap2 | 117272 | 1,14 | down |
| 6336248 | 7078326 | 1075903 | phosphoribosyl pyrophosphate synthetase-associated protein 2 | Prpsap2 | 117272 | 1,05 | up   |
| 6367280 | 7078326 | 1075894 | phosphoribosyl pyrophosphate synthetase-associated protein 2 | Prpsap2 | 117272 | 2,89 | down |
| 6452374 | 7078326 | 1075905 | phosphoribosyl pyrophosphate synthetase-associated protein 2 | Prpsap2 | 117272 | 1,40 | down |
| 6625461 | 7078326 | 1075898 | phosphoribosyl pyrophosphate synthetase-associated protein 2 | Prpsap2 | 117272 | 1,19 | up   |
| 5630899 | 7307499 | 1641434 | phosphorylase, glycogen, liver                               | Pygl    | 64035  | 1,16 | up   |
| 5640733 | 7307499 | 1641435 | phosphorylase, glycogen, liver                               | Pygl    | 64035  | 1,13 | up   |
| 5660870 | 7307499 | 1641418 | phosphorylase, glycogen, liver                               | Pygl    | 64035  | 1,07 | down |
| 5664529 | 7307499 | 1641433 | phosphorylase, glycogen, liver                               | Pygl    | 64035  | 1,03 | up   |
| 5670906 | 7307499 | 1641420 | phosphorylase, glycogen, liver                               | Pygl    | 64035  | 1,73 | up   |
| 5704859 | 7307499 | 1641429 | phosphorylase, glycogen, liver                               | Pygl    | 64035  | 1,59 | down |
| 5713137 | 7307499 | 1641416 | phosphorylase, glycogen, liver                               | Pygl    | 64035  | 1,17 | down |
| 5876947 | 7307499 | 1641424 | phosphorylase, glycogen, liver                               | Pygl    | 64035  | 1,08 | up   |
| 5883188 | 7307499 | 1641432 | phosphorylase, glycogen, liver                               | Pygl    | 64035  | 1,30 | up   |
| 5951249 | 7307499 | 1641417 | phosphorylase, glycogen, liver                               | Pygl    | 64035  | 1,03 | down |
| 5996895 | 7307499 | 1641422 | phosphorylase, glycogen, liver                               | Pygl    | 64035  | 1,42 | down |
| 6093310 | 7307499 | 1641415 | phosphorylase, glycogen, liver                               | Pygl    | 64035  | 1,05 | down |
| 6211168 | 7307499 | 1641425 | phosphorylase, glycogen, liver                               | Pygl    | 64035  | 1,09 | down |
| 6268816 | 7307499 | 1641430 | phosphorylase, glycogen, liver                               | Pygl    | 64035  | 2,40 | down |
| 6421641 | 7307499 | 1641426 | phosphorylase, glycogen, liver                               | Pygl    | 64035  | 1,07 | up   |
| 6438137 | 7307499 | 1641431 | phosphorylase, glycogen, liver                               | Pygl    | 64035  | 1,13 | down |
| 6482279 | 7307499 | 1641433 | phosphorylase, glycogen, liver                               | Pygl    | 64035  | 1,08 | down |
| 6490123 | 7307499 | 1641435 | phosphorylase, glycogen, liver                               | Pygl    | 64035  | 1,21 | down |
| 6504251 | 7307499 | 1641421 | phosphorylase, glycogen, liver                               | Pygl    | 64035  | 1,17 | down |
| 6538431 | 7307499 | 1641419 | phosphorylase, glycogen, liver                               | Pygl    | 64035  | 1,06 | down |
| 6568679 | 7307499 | 1641428 | phosphorylase, glycogen, liver                               | Pygl    | 64035  | 1,75 | up   |
| 6575204 | 7307499 | 1641427 | phosphorylase, glycogen, liver                               | Pygl    | 64035  | 1,48 | up   |
| 6694101 | 7307499 | 1641423 | phosphorylase, glycogen, liver                               | Pygl    | 64035  | 1,13 | down |
| 5658747 | 7039302 | 983844  | phosphorylase, glycogen, muscle                              | Pygm    | 24701  | 1,01 | down |
| 5659420 | 7039302 | 983862  | phosphorylase, glycogen, muscle                              | Pygm    | 24701  | 1,29 | down |
| 5731408 | 7039302 | 983848  | phosphorylase, glycogen, muscle                              | Pygm    | 24701  | 1,22 | up   |
| 5810218 | 7039302 | 983851  | phosphorylase, glycogen, muscle                              | Pygm    | 24701  | 1,42 | up   |
| 5844406 | 7039302 | 983857  | phosphorylase, glycogen, muscle                              | Pygm    | 24701  | 1,02 | up   |
| 5894647 | 7039302 | 983853  | phosphorylase, glycogen, muscle                              | Pygm    | 24701  | 1,15 | down |
| 5896997 | 7039302 | 983845  | phosphorylase, glycogen, muscle                              | Pygm    | 24701  | 1,14 | down |
| 5904567 | 7039302 | 983852  | phosphorylase, glycogen, muscle                              | Pygm    | 24701  | 1,13 | down |
| 6006671 | 7039302 | 983860  | phosphorylase, glycogen, muscle                              | Pygm    | 24701  | 1,30 | down |
| 6008100 | 7039302 | 983864  | phosphorylase, glycogen, muscle                              | Pygm    | 24701  | 1,10 | up   |
| 6157712 | 7039302 | 983854  | phosphorylase, glycogen, muscle                              | Pygm    | 24701  | 1,42 | up   |

|         |         |         |                                                                  |            |        |      |      |
|---------|---------|---------|------------------------------------------------------------------|------------|--------|------|------|
| 6185492 | 7039302 | 983859  | phosphorylase, glycogen, muscle                                  | Pygm       | 24701  | 1,24 | down |
| 6192951 | 7039302 | 983858  | phosphorylase, glycogen, muscle                                  | Pygm       | 24701  | 1,20 | down |
| 6223682 | 7039302 | 983863  | phosphorylase, glycogen, muscle                                  | Pygm       | 24701  | 1,01 | up   |
| 6386880 | 7039302 | 983846  | phosphorylase, glycogen, muscle                                  | Pygm       | 24701  | 1,38 | up   |
| 6569930 | 7039302 | 983856  | phosphorylase, glycogen, muscle                                  | Pygm       | 24701  | 1,01 | up   |
| 6618715 | 7039302 | 983847  | phosphorylase, glycogen, muscle                                  | Pygm       | 24701  | 1,17 | down |
| 6639084 | 7039302 | 983855  | phosphorylase, glycogen, muscle                                  | Pygm       | 24701  | 2,44 | down |
| 6695982 | 7039302 | 983861  | phosphorylase, glycogen, muscle                                  | Pygm       | 24701  | 1,38 | up   |
| 6717187 | 7039302 | 983849  | phosphorylase, glycogen, muscle                                  | Pygm       | 24701  | 1,09 | down |
| 6726278 | 7039302 | 983842  | phosphorylase, glycogen, muscle                                  | Pygm       | 24701  | 1,28 | up   |
| 5630591 | 7060776 | 1033189 | phosphoserine aminotransferase 1                                 | Psat1      | 293820 | 1,10 | up   |
| 5679347 | 7060776 | 1033194 | phosphoserine aminotransferase 1                                 | Psat1      | 293820 | 2,01 | up   |
| 5696120 | 7060776 | 1033190 | phosphoserine aminotransferase 1                                 | Psat1      | 293820 | 1,13 | down |
| 6082877 | 7060776 | 1033196 | phosphoserine aminotransferase 1                                 | Psat1      | 293820 | 1,29 | up   |
| 6088033 | 7060776 | 1033191 | phosphoserine aminotransferase 1                                 | Psat1      | 293820 | 1,38 | up   |
| 6262201 | 7060776 | 1033193 | phosphoserine aminotransferase 1                                 | Psat1      | 293820 | 2,18 | down |
| 6271171 | 7060776 | 1033187 | phosphoserine aminotransferase 1                                 | Psat1      | 293820 | 1,05 | up   |
| 6345777 | 7060776 | 1033195 | phosphoserine aminotransferase 1                                 | Psat1      | 293820 | 1,08 | up   |
| 6357198 | 7060776 | 1033188 | phosphoserine aminotransferase 1                                 | Psat1      | 293820 | 1,10 | down |
| 6479752 | 7060776 | 1033192 | phosphoserine aminotransferase 1                                 | Psat1      | 293820 | 1,09 | down |
| 5707676 | 7101619 | 1131502 | phosphoserine phosphatase                                        | Psph       | 304429 | 1,28 | down |
| 5915618 | 7101619 | 1131506 | phosphoserine phosphatase                                        | Psph       | 304429 | 2,42 | up   |
| 6052429 | 7101619 | 1131503 | phosphoserine phosphatase                                        | Psph       | 304429 | 1,26 | down |
| 6233517 | 7101619 | 1131504 | phosphoserine phosphatase                                        | Psph       | 304429 | 1,03 | up   |
| 6304720 | 7101619 | 1131506 | phosphoserine phosphatase                                        | Psph       | 304429 | 1,15 | down |
| 6400533 | 7101619 | 1131505 | phosphoserine phosphatase                                        | Psph       | 304429 | 1,29 | down |
| 6476278 | 7101619 | 1131500 | phosphoserine phosphatase                                        | Psph       | 304429 | 1,25 | up   |
| 6592204 | 7101619 | 1131501 | phosphoserine phosphatase                                        | Psph       | 304429 | 1,15 | up   |
| 5717337 | 7042063 | 990698  | Phytn_dehydro and Pyr_redox domain containing protein RGD1303232 | RGD1303232 | 309381 | 1,15 | down |
| 5741121 | 7042063 | 990694  | Phytn_dehydro and Pyr_redox domain containing protein RGD1303232 | RGD1303232 | 309381 | 1,31 | down |
| 5845993 | 7042063 | 990694  | Phytn_dehydro and Pyr_redox domain containing protein RGD1303232 | RGD1303232 | 309381 | 1,30 | down |
| 5894853 | 7042063 | 990691  | Phytn_dehydro and Pyr_redox domain containing protein RGD1303232 | RGD1303232 | 309381 | 1,35 | down |
| 5911904 | 7042063 | 990693  | Phytn_dehydro and Pyr_redox domain containing protein RGD1303232 | RGD1303232 | 309381 | 2,05 | down |
| 5921741 | 7042063 | 990700  | Phytn_dehydro and Pyr_redox domain containing protein RGD1303232 | RGD1303232 | 309381 | 1,47 | up   |
| 5945720 | 7042063 | 990699  | Phytn_dehydro and Pyr_redox domain containing protein RGD1303232 | RGD1303232 | 309381 | 1,39 | up   |
| 5949166 | 7042063 | 990686  | Phytn_dehydro and Pyr_redox domain containing protein RGD1303232 | RGD1303232 | 309381 | 1,11 | up   |
| 5960815 | 7042063 | 990699  | Phytn_dehydro and Pyr_redox domain containing protein RGD1303232 | RGD1303232 | 309381 | 1,27 | down |
| 5967512 | 7042063 | 990701  | Phytn_dehydro and Pyr_redox domain containing protein RGD1303232 | RGD1303232 | 309381 | 1,00 | up   |
| 6054737 | 7042063 | 990694  | Phytn_dehydro and Pyr_redox domain containing protein RGD1303232 | RGD1303232 | 309381 | 1,44 | down |
| 6084209 | 7042063 | 990687  | Phytn_dehydro and Pyr_redox domain containing protein RGD1303232 | RGD1303232 | 309381 | 1,20 | down |
| 6150693 | 7042063 | 990692  | Phytn_dehydro and Pyr_redox domain containing protein RGD1303232 | RGD1303232 | 309381 | 1,01 | down |
| 6176505 | 7042063 | 990688  | Phytn_dehydro and Pyr_redox domain containing protein RGD1303232 | RGD1303232 | 309381 | 1,60 | up   |
| 6288106 | 7042063 | 990690  | Phytn_dehydro and Pyr_redox domain containing protein RGD1303232 | RGD1303232 | 309381 | 1,30 | up   |
| 6297096 | 7042063 | 990697  | Phytn_dehydro and Pyr_redox domain containing protein RGD1303232 | RGD1303232 | 309381 | 1,22 | up   |
| 6381466 | 7042063 | 990695  | Phytn_dehydro and Pyr_redox domain containing protein RGD1303232 | RGD1303232 | 309381 | 1,36 | up   |
| 6593518 | 7042063 | 990696  | Phytn_dehydro and Pyr_redox domain containing protein RGD1303232 | RGD1303232 | 309381 | 1,20 | down |
| 6676905 | 7042063 | 990688  | Phytn_dehydro and Pyr_redox domain containing protein RGD1303232 | RGD1303232 | 309381 | 1,05 | up   |
| 6740011 | 7042063 | 990689  | Phytn_dehydro and Pyr_redox domain containing protein RGD1303232 | RGD1303232 | 309381 | 1,80 | down |
| 5656521 | 7031460 | 963829  | PIH1 domain containing 1                                         | Pih1d1     | 292898 | 1,26 | down |
| 5700488 | 7031460 | 963832  | PIH1 domain containing 1                                         | Pih1d1     | 292898 | 1,14 | down |
| 5704990 | 7031460 | 963833  | PIH1 domain containing 1                                         | Pih1d1     | 292898 | 1,10 | up   |
| 5956015 | 7031460 | 963825  | PIH1 domain containing 1                                         | Pih1d1     | 292898 | 1,09 | down |
| 6140296 | 7031460 | 963832  | PIH1 domain containing 1                                         | Pih1d1     | 292898 | 1,31 | down |
| 6211909 | 7031460 | 963830  | PIH1 domain containing 1                                         | Pih1d1     | 292898 | 1,36 | up   |
| 6224365 | 7031460 | 963831  | PIH1 domain containing 1                                         | Pih1d1     | 292898 | 1,14 | down |
| 6269782 | 7031460 | 963827  | PIH1 domain containing 1                                         | Pih1d1     | 292898 | 2,03 | down |

|         |         |         |                                                                             |          |        |      |      |
|---------|---------|---------|-----------------------------------------------------------------------------|----------|--------|------|------|
| 6272413 | 7031460 | 963826  | PIH1 domain containing 1                                                    | Pih1d1   | 292898 | 1,17 | up   |
| 6492760 | 7031460 | 963828  | PIH1 domain containing 1                                                    | Pih1d1   | 292898 | 1,44 | down |
| 5678005 | 7308833 | 1644625 | placental growth factor                                                     | Pgf      | 94203  | 1,01 | down |
| 5679718 | 7308833 | 1644622 | placental growth factor                                                     | Pgf      | 94203  | 1,21 | up   |
| 5754955 | 7308833 | 1644627 | placental growth factor                                                     | Pgf      | 94203  | 2,10 | up   |
| 5908016 | 7308833 | 1644623 | placental growth factor                                                     | Pgf      | 94203  | 1,06 | down |
| 6495431 | 7308833 | 1644626 | placental growth factor                                                     | Pgf      | 94203  | 1,00 | down |
| 6529030 | 7308833 | 1644628 | placental growth factor                                                     | Pgf      | 94203  | 1,18 | up   |
| 6650364 | 7308833 | 1644624 | placental growth factor                                                     | Pgf      | 94203  | 1,48 | down |
| 5640573 | 7111567 | 1155986 | plakophilin 1                                                               | Pkp1     | 304822 | 1,06 | down |
| 5687123 | 7111567 | 1155985 | plakophilin 1                                                               | Pkp1     | 304822 | 1,15 | down |
| 5891548 | 7111567 | 1155983 | plakophilin 1                                                               | Pkp1     | 304822 | 1,13 | down |
| 5929407 | 7111567 | 1155992 | plakophilin 1                                                               | Pkp1     | 304822 | 1,04 | down |
| 6294214 | 7111567 | 1155984 | plakophilin 1                                                               | Pkp1     | 304822 | 1,00 | up   |
| 6359131 | 7111567 | 1155983 | plakophilin 1                                                               | Pkp1     | 304822 | 1,06 | up   |
| 6390064 | 7111567 | 1156001 | plakophilin 1                                                               | Pkp1     | 304822 | 1,24 | up   |
| 6390831 | 7111567 | 1155987 | plakophilin 1                                                               | Pkp1     | 304822 | 2,49 | up   |
| 6431577 | 7111567 | 1155994 | plakophilin 1                                                               | Pkp1     | 304822 | 1,30 | down |
| 6432423 | 7111567 | 1155993 | plakophilin 1                                                               | Pkp1     | 304822 | 1,01 | up   |
| 6453740 | 7111567 | 1155991 | plakophilin 1                                                               | Pkp1     | 304822 | 1,18 | down |
| 6480880 | 7111567 | 1156006 | plakophilin 1                                                               | Pkp1     | 304822 | 1,31 | down |
| 6500767 | 7111567 | 1155995 | plakophilin 1                                                               | Pkp1     | 304822 | 1,92 | down |
| 6598001 | 7111567 | 1155990 | plakophilin 1                                                               | Pkp1     | 304822 | 1,03 | down |
| 6605167 | 7111567 | 1155983 | plakophilin 1                                                               | Pkp1     | 304822 | 1,33 | up   |
| 6658895 | 7111567 | 1155988 | plakophilin 1                                                               | Pkp1     | 304822 | 1,41 | down |
| 6733030 | 7111567 | 1155989 | plakophilin 1                                                               | Pkp1     | 304822 | 1,66 | down |
| 5933593 | 7275003 | 1559933 | plasticity-related gene 3                                                   | Prg-3    | 298062 | 1,66 | down |
| 5943869 | 7275003 | 1559933 | plasticity-related gene 3                                                   | Prg-3    | 298062 | 1,36 | down |
| 6152171 | 7275003 | 1559935 | plasticity-related gene 3                                                   | Prg-3    | 298062 | 1,44 | up   |
| 6486854 | 7275003 | 1559936 | plasticity-related gene 3                                                   | Prg-3    | 298062 | 1,67 | down |
| 6527444 | 7275003 | 1559932 | plasticity-related gene 3                                                   | Prg-3    | 298062 | 1,16 | down |
| 6616059 | 7275003 | 1559934 | plasticity-related gene 3                                                   | Prg-3    | 298062 | 1,63 | up   |
| 6656233 | 7275003 | 1559931 | plasticity-related gene 3                                                   | Prg-3    | 298062 | 1,12 | up   |
| 6712830 | 7275003 | 1559931 | plasticity-related gene 3                                                   | Prg-3    | 298062 | 1,84 | up   |
| 5770703 | 7048947 | 1007413 | platelet-activating factor acetylhydrolase, isoform Ib, gamma subunit       | Pafah1b3 | 114113 | 1,39 | down |
| 5818566 | 7048947 | 1007418 | platelet-activating factor acetylhydrolase, isoform Ib, gamma subunit       | Pafah1b3 | 114113 | 2,18 | down |
| 6050589 | 7048947 | 1007417 | platelet-activating factor acetylhydrolase, isoform Ib, gamma subunit       | Pafah1b3 | 114113 | 1,30 | up   |
| 6226993 | 7048947 | 1007414 | platelet-activating factor acetylhydrolase, isoform Ib, gamma subunit       | Pafah1b3 | 114113 | 1,73 | down |
| 6296817 | 7048947 | 1007416 | platelet-activating factor acetylhydrolase, isoform Ib, gamma subunit       | Pafah1b3 | 114113 | 1,01 | down |
| 6439019 | 7048947 | 1007415 | platelet-activating factor acetylhydrolase, isoform Ib, gamma subunit       | Pafah1b3 | 114113 | 1,53 | up   |
| 5618874 | 7054975 | 1020637 | pleckstrin homology domain containing, family B (evectins) member 1         | Plekhhb1 | 64471  | 1,16 | down |
| 5736074 | 7054975 | 1020635 | pleckstrin homology domain containing, family B (evectins) member 1         | Plekhhb1 | 64471  | 2,25 | down |
| 5810927 | 7054975 | 1020636 | pleckstrin homology domain containing, family B (evectins) member 1         | Plekhhb1 | 64471  | 1,22 | up   |
| 6052423 | 7054975 | 1020638 | pleckstrin homology domain containing, family B (evectins) member 1         | Plekhhb1 | 64471  | 1,21 | up   |
| 6064069 | 7054975 | 1020635 | pleckstrin homology domain containing, family B (evectins) member 1         | Plekhhb1 | 64471  | 1,11 | up   |
| 6091140 | 7054975 | 1020643 | pleckstrin homology domain containing, family B (evectins) member 1         | Plekhhb1 | 64471  | 1,24 | up   |
| 6099373 | 7054975 | 1020635 | pleckstrin homology domain containing, family B (evectins) member 1         | Plekhhb1 | 64471  | 1,29 | down |
| 6236923 | 7054975 | 1020639 | pleckstrin homology domain containing, family B (evectins) member 1         | Plekhhb1 | 64471  | 1,35 | down |
| 6269551 | 7054975 | 1020638 | pleckstrin homology domain containing, family B (evectins) member 1         | Plekhhb1 | 64471  | 1,33 | down |
| 6320489 | 7054975 | 1020641 | pleckstrin homology domain containing, family B (evectins) member 1         | Plekhhb1 | 64471  | 1,03 | down |
| 6587371 | 7054975 | 1020640 | pleckstrin homology domain containing, family B (evectins) member 1         | Plekhhb1 | 64471  | 2,01 | up   |
| 6626421 | 7054975 | 1020642 | pleckstrin homology domain containing, family B (evectins) member 1         | Plekhhb1 | 64471  | 1,01 | down |
| 6732630 | 7054975 | 1020636 | pleckstrin homology domain containing, family B (evectins) member 1         | Plekhhb1 | 64471  | 1,20 | down |
| 5942575 | 7299512 | 1620544 | pleckstrin homology domain containing, family G (with RhoGef domain) member | Plekhhg3 | 314249 | 1,05 | up   |
| 6168933 | 7299512 | 1620537 | pleckstrin homology domain containing, family G (with RhoGef domain) member | Plekhhg3 | 314249 | 1,44 | down |
| 6659001 | 7299512 | 1620558 | pleckstrin homology domain containing, family G (with RhoGef domain) member | Plekhhg3 | 314249 | 1,49 | up   |



|         |         |         |                                                                            |         |        |      |      |
|---------|---------|---------|----------------------------------------------------------------------------|---------|--------|------|------|
| 5657464 | 7082832 | 1085753 | pleckstrin homology domain containing, family H (with MyTH4 domain) member | Plekhh3 | 360634 | 1,10 | up   |
| 5847818 | 7082832 | 1085754 | pleckstrin homology domain containing, family H (with MyTH4 domain) member | Plekhh3 | 360634 | 1,41 | down |
| 5857212 | 7082832 | 1085748 | pleckstrin homology domain containing, family H (with MyTH4 domain) member | Plekhh3 | 360634 | 1,40 | down |
| 5968864 | 7082832 | 1085761 | pleckstrin homology domain containing, family H (with MyTH4 domain) member | Plekhh3 | 360634 | 1,13 | down |
| 6029836 | 7082832 | 1085750 | pleckstrin homology domain containing, family H (with MyTH4 domain) member | Plekhh3 | 360634 | 3,03 | up   |
| 6042034 | 7082832 | 1085750 | pleckstrin homology domain containing, family H (with MyTH4 domain) member | Plekhh3 | 360634 | 1,14 | up   |
| 6057812 | 7082832 | 1085752 | pleckstrin homology domain containing, family H (with MyTH4 domain) member | Plekhh3 | 360634 | 1,35 | up   |
| 6076940 | 7082832 | 1085751 | pleckstrin homology domain containing, family H (with MyTH4 domain) member | Plekhh3 | 360634 | 1,21 | down |
| 6132152 | 7082832 | 1085755 | pleckstrin homology domain containing, family H (with MyTH4 domain) member | Plekhh3 | 360634 | 1,34 | down |
| 6177950 | 7082832 | 1085756 | pleckstrin homology domain containing, family H (with MyTH4 domain) member | Plekhh3 | 360634 | 1,18 | up   |
| 6264639 | 7082832 | 1085750 | pleckstrin homology domain containing, family H (with MyTH4 domain) member | Plekhh3 | 360634 | 1,23 | up   |
| 6294104 | 7082832 | 1085749 | pleckstrin homology domain containing, family H (with MyTH4 domain) member | Plekhh3 | 360634 | 1,33 | down |
| 6297159 | 7082832 | 1085757 | pleckstrin homology domain containing, family H (with MyTH4 domain) member | Plekhh3 | 360634 | 1,56 | down |
| 6430609 | 7082832 | 1085759 | pleckstrin homology domain containing, family H (with MyTH4 domain) member | Plekhh3 | 360634 | 1,18 | up   |
| 6448139 | 7082832 | 1085749 | pleckstrin homology domain containing, family H (with MyTH4 domain) member | Plekhh3 | 360634 | 1,30 | down |
| 6567518 | 7082832 | 1085750 | pleckstrin homology domain containing, family H (with MyTH4 domain) member | Plekhh3 | 360634 | 1,80 | up   |
| 6584125 | 7082832 | 1085758 | pleckstrin homology domain containing, family H (with MyTH4 domain) member | Plekhh3 | 360634 | 1,11 | up   |
| 6702470 | 7082832 | 1085748 | pleckstrin homology domain containing, family H (with MyTH4 domain) member | Plekhh3 | 360634 | 1,04 | down |
| 5862063 | 7087965 | 1098061 | pleckstrin homology-like domain, family B, member 2                        | Phldb2  | 685611 | 1,90 | down |
| 6114437 | 7087965 | 1098061 | pleckstrin homology-like domain, family B, member 2                        | Phldb2  | 685611 | 1,20 | down |
| 6201170 | 7087965 | 1098061 | pleckstrin homology-like domain, family B, member 2                        | Phldb2  | 685611 | 1,13 | down |
| 5776276 | 7025049 | 948509  | pleiomorphic adenoma gene-like 1                                           | Plagl1  | 25157  | 2,08 | up   |
| 5840676 | 7025049 | 948511  | pleiomorphic adenoma gene-like 1                                           | Plagl1  | 25157  | 1,43 | up   |
| 5875070 | 7025049 | 948509  | pleiomorphic adenoma gene-like 1                                           | Plagl1  | 25157  | 1,58 | up   |
| 6032642 | 7025049 | 948504  | pleiomorphic adenoma gene-like 1                                           | Plagl1  | 25157  | 1,39 | up   |
| 6176433 | 7025049 | 948509  | pleiomorphic adenoma gene-like 1                                           | Plagl1  | 25157  | 1,56 | up   |
| 6293632 | 7025049 | 948508  | pleiomorphic adenoma gene-like 1                                           | Plagl1  | 25157  | 1,41 | down |
| 6306487 | 7025049 | 948508  | pleiomorphic adenoma gene-like 1                                           | Plagl1  | 25157  | 1,16 | down |
| 6358512 | 7025049 | 948509  | pleiomorphic adenoma gene-like 1                                           | Plagl1  | 25157  | 1,05 | up   |
| 6448004 | 7025049 | 948505  | pleiomorphic adenoma gene-like 1                                           | Plagl1  | 25157  | 1,04 | up   |
| 6468311 | 7025049 | 948509  | pleiomorphic adenoma gene-like 1                                           | Plagl1  | 25157  | 1,42 | down |
| 6482710 | 7025049 | 948506  | pleiomorphic adenoma gene-like 1                                           | Plagl1  | 25157  | 1,21 | down |
| 6613224 | 7025049 | 948507  | pleiomorphic adenoma gene-like 1                                           | Plagl1  | 25157  | 1,27 | up   |
| 6619574 | 7025049 | 948510  | pleiomorphic adenoma gene-like 1                                           | Plagl1  | 25157  | 1,36 | down |
| 6620853 | 7025049 | 948509  | pleiomorphic adenoma gene-like 1                                           | Plagl1  | 25157  | 1,14 | down |
| 5618620 | 7109373 | 1150971 | plexin A2                                                                  | Plxna2  | 289392 | 1,36 | up   |
| 5638391 | 7109373 | 1150985 | plexin A2                                                                  | Plxna2  | 289392 | 1,43 | down |
| 5663513 | 7109373 | 1150948 | plexin A2                                                                  | Plxna2  | 289392 | 1,16 | up   |
| 5681377 | 7109373 | 1150979 | plexin A2                                                                  | Plxna2  | 289392 | 1,22 | up   |
| 5702655 | 7109373 | 1150964 | plexin A2                                                                  | Plxna2  | 289392 | 1,12 | down |
| 5717752 | 7109373 | 1150985 | plexin A2                                                                  | Plxna2  | 289392 | 1,01 | down |
| 5737859 | 7109373 | 1150918 | plexin A2                                                                  | Plxna2  | 289392 | 1,04 | down |
| 5833833 | 7109373 | 1150943 | plexin A2                                                                  | Plxna2  | 289392 | 1,14 | up   |
| 5836145 | 7109373 | 1150962 | plexin A2                                                                  | Plxna2  | 289392 | 1,08 | up   |
| 5885832 | 7109373 | 1150985 | plexin A2                                                                  | Plxna2  | 289392 | 1,04 | down |
| 5922695 | 7109373 | 1150965 | plexin A2                                                                  | Plxna2  | 289392 | 1,12 | down |
| 5949500 | 7109373 | 1150982 | plexin A2                                                                  | Plxna2  | 289392 | 1,12 | down |
| 5950368 | 7109373 | 1150949 | plexin A2                                                                  | Plxna2  | 289392 | 1,08 | down |
| 5974458 | 7109373 | 1150967 | plexin A2                                                                  | Plxna2  | 289392 | 1,01 | up   |
| 5996914 | 7109373 | 1150977 | plexin A2                                                                  | Plxna2  | 289392 | 1,75 | up   |
| 6025162 | 7109373 | 1150973 | plexin A2                                                                  | Plxna2  | 289392 | 1,11 | down |
| 6029016 | 7109373 | 1150985 | plexin A2                                                                  | Plxna2  | 289392 | 1,17 | down |
| 6073897 | 7109373 | 1150915 | plexin A2                                                                  | Plxna2  | 289392 | 1,07 | up   |
| 6083464 | 7109373 | 1150983 | plexin A2                                                                  | Plxna2  | 289392 | 1,42 | down |
| 6123980 | 7109373 | 1150985 | plexin A2                                                                  | Plxna2  | 289392 | 1,32 | down |
| 6156950 | 7109373 | 1150963 | plexin A2                                                                  | Plxna2  | 289392 | 1,26 | up   |

|         |         |         |              |         |        |      |      |
|---------|---------|---------|--------------|---------|--------|------|------|
| 6183958 | 7109373 | 1150970 | plexin A2    | Plxna2  | 289392 | 1,06 | up   |
| 6186843 | 7109373 | 1150942 | plexin A2    | Plxna2  | 289392 | 1,17 | down |
| 6232778 | 7109373 | 1150945 | plexin A2    | Plxna2  | 289392 | 1,03 | up   |
| 6267658 | 7109373 | 1150984 | plexin A2    | Plxna2  | 289392 | 1,05 | up   |
| 6334098 | 7109373 | 1150984 | plexin A2    | Plxna2  | 289392 | 1,52 | down |
| 6335547 | 7109373 | 1150981 | plexin A2    | Plxna2  | 289392 | 1,50 | up   |
| 6418083 | 7109373 | 1150961 | plexin A2    | Plxna2  | 289392 | 1,71 | down |
| 6433934 | 7109373 | 1150919 | plexin A2    | Plxna2  | 289392 | 1,29 | down |
| 6436858 | 7109373 | 1150944 | plexin A2    | Plxna2  | 289392 | 1,15 | up   |
| 6470910 | 7109373 | 1150927 | plexin A2    | Plxna2  | 289392 | 2,23 | up   |
| 6488588 | 7109373 | 1150969 | plexin A2    | Plxna2  | 289392 | 1,19 | up   |
| 6499261 | 7109373 | 1150954 | plexin A2    | Plxna2  | 289392 | 1,36 | down |
| 6527806 | 7109373 | 1150927 | plexin A2    | Plxna2  | 289392 | 1,12 | up   |
| 6553625 | 7109373 | 1150972 | plexin A2    | Plxna2  | 289392 | 1,23 | down |
| 6576501 | 7109373 | 1150968 | plexin A2    | Plxna2  | 289392 | 1,05 | down |
| 6584458 | 7109373 | 1150941 | plexin A2    | Plxna2  | 289392 | 1,19 | up   |
| 6584812 | 7109373 | 1150958 | plexin A2    | Plxna2  | 289392 | 1,29 | up   |
| 6744089 | 7109373 | 1150966 | plexin A2    | Plxna2  | 289392 | 1,14 | up   |
| 5618848 | 7263401 | 1530964 | plexin A4, A | Plxna4a | 312213 | 1,17 | down |
| 5702093 | 7263401 | 1531029 | plexin A4, A | Plxna4a | 312213 | 1,11 | up   |
| 5733706 | 7263401 | 1530985 | plexin A4, A | Plxna4a | 312213 | 1,78 | up   |
| 5735372 | 7263401 | 1530968 | plexin A4, A | Plxna4a | 312213 | 1,09 | up   |
| 5798128 | 7263401 | 1530977 | plexin A4, A | Plxna4a | 312213 | 1,13 | up   |
| 5816030 | 7263401 | 1530955 | plexin A4, A | Plxna4a | 312213 | 1,17 | up   |
| 5816657 | 7263401 | 1530971 | plexin A4, A | Plxna4a | 312213 | 1,05 | down |
| 5855838 | 7263401 | 1530963 | plexin A4, A | Plxna4a | 312213 | 1,16 | up   |
| 5910447 | 7263401 | 1530951 | plexin A4, A | Plxna4a | 312213 | 1,09 | up   |
| 5920778 | 7263401 | 1530957 | plexin A4, A | Plxna4a | 312213 | 1,38 | down |
| 5945013 | 7263401 | 1530978 | plexin A4, A | Plxna4a | 312213 | 1,53 | down |
| 5961557 | 7263401 | 1530983 | plexin A4, A | Plxna4a | 312213 | 1,53 | up   |
| 5967540 | 7263401 | 1530951 | plexin A4, A | Plxna4a | 312213 | 1,38 | down |
| 5977754 | 7263401 | 1530984 | plexin A4, A | Plxna4a | 312213 | 1,13 | up   |
| 6028924 | 7263401 | 1530959 | plexin A4, A | Plxna4a | 312213 | 1,56 | up   |
| 6049144 | 7263401 | 1530972 | plexin A4, A | Plxna4a | 312213 | 1,05 | down |
| 6133867 | 7263401 | 1530965 | plexin A4, A | Plxna4a | 312213 | 1,49 | up   |
| 6155821 | 7263401 | 1531043 | plexin A4, A | Plxna4a | 312213 | 1,42 | down |
| 6157344 | 7263401 | 1530969 | plexin A4, A | Plxna4a | 312213 | 1,18 | up   |
| 6199813 | 7263401 | 1531034 | plexin A4, A | Plxna4a | 312213 | 1,75 | up   |
| 6291981 | 7263401 | 1531034 | plexin A4, A | Plxna4a | 312213 | 1,45 | down |
| 6296650 | 7263401 | 1530958 | plexin A4, A | Plxna4a | 312213 | 1,69 | up   |
| 6297011 | 7263401 | 1530982 | plexin A4, A | Plxna4a | 312213 | 1,20 | up   |
| 6297407 | 7263401 | 1530970 | plexin A4, A | Plxna4a | 312213 | 1,69 | up   |
| 6328253 | 7263401 | 1530966 | plexin A4, A | Plxna4a | 312213 | 1,24 | down |
| 6376301 | 7263401 | 1530976 | plexin A4, A | Plxna4a | 312213 | 1,19 | down |
| 6513011 | 7263401 | 1530953 | plexin A4, A | Plxna4a | 312213 | 1,48 | up   |
| 6588987 | 7263401 | 1530973 | plexin A4, A | Plxna4a | 312213 | 1,40 | down |
| 6603147 | 7263401 | 1530975 | plexin A4, A | Plxna4a | 312213 | 1,04 | down |
| 6645202 | 7263401 | 1530974 | plexin A4, A | Plxna4a | 312213 | 1,21 | up   |
| 6659048 | 7263401 | 1530967 | plexin A4, A | Plxna4a | 312213 | 1,03 | down |
| 6708565 | 7263401 | 1530956 | plexin A4, A | Plxna4a | 312213 | 1,01 | up   |
| 5621317 | 7378546 | 1817589 | plexin B3    | Plxnb3  | 363517 | 1,24 | down |
| 5682449 | 7378546 | 1817608 | plexin B3    | Plxnb3  | 363517 | 2,11 | down |
| 5697136 | 7378546 | 1817601 | plexin B3    | Plxnb3  | 363517 | 1,53 | up   |
| 5699699 | 7378546 | 1817591 | plexin B3    | Plxnb3  | 363517 | 1,04 | down |
| 5707224 | 7378546 | 1817601 | plexin B3    | Plxnb3  | 363517 | 1,78 | up   |
| 5720442 | 7378546 | 1817584 | plexin B3    | Plxnb3  | 363517 | 1,27 | up   |

|         |         |         |           |        |        |      |      |
|---------|---------|---------|-----------|--------|--------|------|------|
| 5754249 | 7378546 | 1817612 | plexin B3 | Plxnb3 | 363517 | 1,08 | up   |
| 5779556 | 7378546 | 1817596 | plexin B3 | Plxnb3 | 363517 | 1,24 | down |
| 5816740 | 7378546 | 1817607 | plexin B3 | Plxnb3 | 363517 | 1,18 | up   |
| 5913850 | 7378546 | 1817599 | plexin B3 | Plxnb3 | 363517 | 1,61 | up   |
| 5948449 | 7378546 | 1817587 | plexin B3 | Plxnb3 | 363517 | 1,29 | down |
| 5973808 | 7378546 | 1817597 | plexin B3 | Plxnb3 | 363517 | 1,05 | down |
| 6013076 | 7378546 | 1817599 | plexin B3 | Plxnb3 | 363517 | 1,27 | up   |
| 6069679 | 7378546 | 1817603 | plexin B3 | Plxnb3 | 363517 | 1,06 | down |
| 6090717 | 7378546 | 1817581 | plexin B3 | Plxnb3 | 363517 | 1,19 | down |
| 6111731 | 7378546 | 1817599 | plexin B3 | Plxnb3 | 363517 | 1,26 | up   |
| 6122936 | 7378546 | 1817582 | plexin B3 | Plxnb3 | 363517 | 1,17 | down |
| 6128595 | 7378546 | 1817595 | plexin B3 | Plxnb3 | 363517 | 1,01 | down |
| 6132248 | 7378546 | 1817588 | plexin B3 | Plxnb3 | 363517 | 1,11 | down |
| 6135904 | 7378546 | 1817583 | plexin B3 | Plxnb3 | 363517 | 1,26 | down |
| 6158592 | 7378546 | 1817590 | plexin B3 | Plxnb3 | 363517 | 1,04 | up   |
| 6158763 | 7378546 | 1817610 | plexin B3 | Plxnb3 | 363517 | 1,04 | up   |
| 6159144 | 7378546 | 1817580 | plexin B3 | Plxnb3 | 363517 | 1,09 | up   |
| 6160917 | 7378546 | 1817580 | plexin B3 | Plxnb3 | 363517 | 1,64 | up   |
| 6211890 | 7378546 | 1817601 | plexin B3 | Plxnb3 | 363517 | 1,03 | down |
| 6244179 | 7378546 | 1817609 | plexin B3 | Plxnb3 | 363517 | 1,04 | up   |
| 6257453 | 7378546 | 1817602 | plexin B3 | Plxnb3 | 363517 | 1,15 | up   |
| 6319424 | 7378546 | 1817592 | plexin B3 | Plxnb3 | 363517 | 1,47 | up   |
| 6323863 | 7378546 | 1817600 | plexin B3 | Plxnb3 | 363517 | 1,04 | up   |
| 6332140 | 7378546 | 1817608 | plexin B3 | Plxnb3 | 363517 | 1,16 | up   |
| 6342640 | 7378546 | 1817609 | plexin B3 | Plxnb3 | 363517 | 1,64 | down |
| 6384948 | 7378546 | 1817585 | plexin B3 | Plxnb3 | 363517 | 1,08 | up   |
| 6405306 | 7378546 | 1817604 | plexin B3 | Plxnb3 | 363517 | 1,40 | down |
| 6417678 | 7378546 | 1817598 | plexin B3 | Plxnb3 | 363517 | 1,13 | down |
| 6441236 | 7378546 | 1817580 | plexin B3 | Plxnb3 | 363517 | 1,08 | down |
| 6462354 | 7378546 | 1817593 | plexin B3 | Plxnb3 | 363517 | 1,36 | down |
| 6515220 | 7378546 | 1817605 | plexin B3 | Plxnb3 | 363517 | 1,31 | down |
| 6572449 | 7378546 | 1817586 | plexin B3 | Plxnb3 | 363517 | 1,12 | up   |
| 6668797 | 7378546 | 1817612 | plexin B3 | Plxnb3 | 363517 | 1,11 | down |
| 6692254 | 7378546 | 1817611 | plexin B3 | Plxnb3 | 363517 | 1,08 | down |
| 6745129 | 7378546 | 1817583 | plexin B3 | Plxnb3 | 363517 | 1,03 | down |
| 5634613 | 7268693 | 1544185 | plexin D1 | Plxnd1 | 312652 | 1,18 | down |
| 5653139 | 7268693 | 1544193 | plexin D1 | Plxnd1 | 312652 | 1,32 | up   |
| 5666540 | 7268693 | 1544176 | plexin D1 | Plxnd1 | 312652 | 1,86 | up   |
| 5673341 | 7268693 | 1544175 | plexin D1 | Plxnd1 | 312652 | 1,32 | down |
| 5676893 | 7268693 | 1544213 | plexin D1 | Plxnd1 | 312652 | 1,49 | down |
| 5678006 | 7268693 | 1544213 | plexin D1 | Plxnd1 | 312652 | 1,48 | down |
| 5684983 | 7268693 | 1544200 | plexin D1 | Plxnd1 | 312652 | 1,14 | up   |
| 5713900 | 7268693 | 1544201 | plexin D1 | Plxnd1 | 312652 | 1,04 | down |
| 5728813 | 7268693 | 1544209 | plexin D1 | Plxnd1 | 312652 | 1,17 | down |
| 5800425 | 7268693 | 1544188 | plexin D1 | Plxnd1 | 312652 | 1,53 | down |
| 5827615 | 7268693 | 1544198 | plexin D1 | Plxnd1 | 312652 | 1,03 | down |
| 5930991 | 7268693 | 1544206 | plexin D1 | Plxnd1 | 312652 | 1,50 | down |
| 5957661 | 7268693 | 1544190 | plexin D1 | Plxnd1 | 312652 | 1,10 | down |
| 6032333 | 7268693 | 1544191 | plexin D1 | Plxnd1 | 312652 | 1,33 | up   |
| 6057157 | 7268693 | 1544181 | plexin D1 | Plxnd1 | 312652 | 1,98 | up   |
| 6086602 | 7268693 | 1544179 | plexin D1 | Plxnd1 | 312652 | 1,03 | up   |
| 6086999 | 7268693 | 1544213 | plexin D1 | Plxnd1 | 312652 | 1,26 | up   |
| 6096097 | 7268693 | 1544204 | plexin D1 | Plxnd1 | 312652 | 2,97 | up   |
| 6107855 | 7268693 | 1544183 | plexin D1 | Plxnd1 | 312652 | 1,11 | down |
| 6109977 | 7268693 | 1544182 | plexin D1 | Plxnd1 | 312652 | 1,82 | down |
| 6111284 | 7268693 | 1544180 | plexin D1 | Plxnd1 | 312652 | 1,50 | down |

|         |         |         |                                 |        |        |      |      |
|---------|---------|---------|---------------------------------|--------|--------|------|------|
| 6114713 | 7268693 | 1544189 | plexin D1                       | Plxnd1 | 312652 | 1,23 | up   |
| 6140371 | 7268693 | 1544194 | plexin D1                       | Plxnd1 | 312652 | 2,00 | up   |
| 6202751 | 7268693 | 1544213 | plexin D1                       | Plxnd1 | 312652 | 2,06 | down |
| 6240320 | 7268693 | 1544186 | plexin D1                       | Plxnd1 | 312652 | 1,11 | down |
| 6264333 | 7268693 | 1544177 | plexin D1                       | Plxnd1 | 312652 | 1,30 | down |
| 6264931 | 7268693 | 1544202 | plexin D1                       | Plxnd1 | 312652 | 1,34 | down |
| 6291343 | 7268693 | 1544187 | plexin D1                       | Plxnd1 | 312652 | 2,44 | down |
| 6313630 | 7268693 | 1544192 | plexin D1                       | Plxnd1 | 312652 | 1,36 | up   |
| 6355862 | 7268693 | 1544199 | plexin D1                       | Plxnd1 | 312652 | 1,10 | down |
| 6369348 | 7268693 | 1544213 | plexin D1                       | Plxnd1 | 312652 | 1,82 | down |
| 6415373 | 7268693 | 1544203 | plexin D1                       | Plxnd1 | 312652 | 1,42 | up   |
| 6452582 | 7268693 | 1544208 | plexin D1                       | Plxnd1 | 312652 | 1,20 | up   |
| 6473221 | 7268693 | 1544213 | plexin D1                       | Plxnd1 | 312652 | 1,10 | down |
| 6475970 | 7268693 | 1544205 | plexin D1                       | Plxnd1 | 312652 | 2,21 | up   |
| 6484511 | 7268693 | 1544213 | plexin D1                       | Plxnd1 | 312652 | 1,48 | up   |
| 6510140 | 7268693 | 1544178 | plexin D1                       | Plxnd1 | 312652 | 1,19 | up   |
| 6576877 | 7268693 | 1544176 | plexin D1                       | Plxnd1 | 312652 | 1,46 | down |
| 6610563 | 7268693 | 1544175 | plexin D1                       | Plxnd1 | 312652 | 1,14 | up   |
| 6646478 | 7268693 | 1544197 | plexin D1                       | Plxnd1 | 312652 | 1,72 | up   |
| 6652019 | 7268693 | 1544184 | plexin D1                       | Plxnd1 | 312652 | 1,01 | up   |
| 6661961 | 7268693 | 1544207 | plexin D1                       | Plxnd1 | 312652 | 1,50 | down |
| 6683620 | 7268693 | 1544195 | plexin D1                       | Plxnd1 | 312652 | 2,89 | up   |
| 6688794 | 7268693 | 1544184 | plexin D1                       | Plxnd1 | 312652 | 1,16 | up   |
| 6694393 | 7268693 | 1544196 | plexin D1                       | Plxnd1 | 312652 | 1,07 | down |
| 5648655 | 7048738 | 1006983 | poliovirus receptor             | PVR    | 25066  | 1,49 | down |
| 5929667 | 7048738 | 1006986 | poliovirus receptor             | PVR    | 25066  | 1,21 | down |
| 6021636 | 7048738 | 1006985 | poliovirus receptor             | PVR    | 25066  | 1,08 | up   |
| 6183003 | 7048738 | 1006989 | poliovirus receptor             | PVR    | 25066  | 1,05 | down |
| 6281736 | 7048738 | 1006988 | poliovirus receptor             | PVR    | 25066  | 1,63 | up   |
| 6313978 | 7048738 | 1006984 | poliovirus receptor             | PVR    | 25066  | 1,08 | down |
| 6335483 | 7048738 | 1006989 | poliovirus receptor             | PVR    | 25066  | 1,91 | down |
| 6352228 | 7048738 | 1006988 | poliovirus receptor             | PVR    | 25066  | 1,64 | up   |
| 6357047 | 7048738 | 1006987 | poliovirus receptor             | PVR    | 25066  | 1,23 | up   |
| 6382728 | 7048738 | 1006981 | poliovirus receptor             | PVR    | 25066  | 1,84 | down |
| 6553824 | 7048738 | 1006981 | poliovirus receptor             | PVR    | 25066  | 1,39 | up   |
| 6714052 | 7048738 | 1006982 | poliovirus receptor             | PVR    | 25066  | 2,12 | down |
| 5676612 | 7036458 | 977033  | polo-like kinase 1 (Drosophila) | Plk1   | 25515  | 1,54 | down |
| 5707670 | 7036458 | 977023  | polo-like kinase 1 (Drosophila) | Plk1   | 25515  | 1,35 | up   |
| 5878261 | 7036458 | 977026  | polo-like kinase 1 (Drosophila) | Plk1   | 25515  | 1,21 | down |
| 5924890 | 7036458 | 977030  | polo-like kinase 1 (Drosophila) | Plk1   | 25515  | 1,83 | down |
| 5943502 | 7036458 | 977029  | polo-like kinase 1 (Drosophila) | Plk1   | 25515  | 1,07 | up   |
| 6054703 | 7036458 | 977028  | polo-like kinase 1 (Drosophila) | Plk1   | 25515  | 1,46 | down |
| 6191409 | 7036458 | 977024  | polo-like kinase 1 (Drosophila) | Plk1   | 25515  | 1,24 | down |
| 6191412 | 7036458 | 977029  | polo-like kinase 1 (Drosophila) | Plk1   | 25515  | 1,22 | up   |
| 6193315 | 7036458 | 977031  | polo-like kinase 1 (Drosophila) | Plk1   | 25515  | 1,07 | down |
| 6395616 | 7036458 | 977027  | polo-like kinase 1 (Drosophila) | Plk1   | 25515  | 1,32 | down |
| 6536873 | 7036458 | 977024  | polo-like kinase 1 (Drosophila) | Plk1   | 25515  | 1,07 | up   |
| 6576410 | 7036458 | 977025  | polo-like kinase 1 (Drosophila) | Plk1   | 25515  | 1,37 | down |
| 6664981 | 7036458 | 977034  | polo-like kinase 1 (Drosophila) | Plk1   | 25515  | 1,40 | up   |
| 6692690 | 7036458 | 977032  | polo-like kinase 1 (Drosophila) | Plk1   | 25515  | 1,21 | up   |
| 5676623 | 7189518 | 1348522 | polo-like kinase 2 (Drosophila) | Plk2   | 83722  | 1,77 | down |
| 5706208 | 7189518 | 1348517 | polo-like kinase 2 (Drosophila) | Plk2   | 83722  | 1,36 | up   |
| 5782983 | 7189518 | 1348515 | polo-like kinase 2 (Drosophila) | Plk2   | 83722  | 1,26 | up   |
| 5976210 | 7189518 | 1348524 | polo-like kinase 2 (Drosophila) | Plk2   | 83722  | 2,57 | down |
| 5977933 | 7189518 | 1348511 | polo-like kinase 2 (Drosophila) | Plk2   | 83722  | 1,07 | down |
| 6129173 | 7189518 | 1348514 | polo-like kinase 2 (Drosophila) | Plk2   | 83722  | 1,43 | up   |

|         |         |         |                                                |        |        |      |      |
|---------|---------|---------|------------------------------------------------|--------|--------|------|------|
| 6143750 | 7189518 | 1348512 | polo-like kinase 2 (Drosophila)                | Plk2   | 83722  | 1,01 | up   |
| 6244353 | 7189518 | 1348510 | polo-like kinase 2 (Drosophila)                | Plk2   | 83722  | 1,99 | down |
| 6386456 | 7189518 | 1348519 | polo-like kinase 2 (Drosophila)                | Plk2   | 83722  | 1,39 | down |
| 6392393 | 7189518 | 1348523 | polo-like kinase 2 (Drosophila)                | Plk2   | 83722  | 1,57 | down |
| 6466203 | 7189518 | 1348513 | polo-like kinase 2 (Drosophila)                | Plk2   | 83722  | 1,68 | up   |
| 6553856 | 7189518 | 1348518 | polo-like kinase 2 (Drosophila)                | Plk2   | 83722  | 1,20 | down |
| 6669663 | 7189518 | 1348516 | polo-like kinase 2 (Drosophila)                | Plk2   | 83722  | 1,90 | up   |
| 6685311 | 7189518 | 1348521 | polo-like kinase 2 (Drosophila)                | Plk2   | 83722  | 1,12 | down |
| 6734185 | 7189518 | 1348520 | polo-like kinase 2 (Drosophila)                | Plk2   | 83722  | 1,87 | up   |
| 5682946 | 7258670 | 1519334 | poly (ADP-ribose) polymerase family, member 11 | Parp11 | 500323 | 1,63 | down |
| 5824837 | 7258670 | 1519343 | poly (ADP-ribose) polymerase family, member 11 | Parp11 | 500323 | 1,26 | up   |
| 6023777 | 7258670 | 1519335 | poly (ADP-ribose) polymerase family, member 11 | Parp11 | 500323 | 1,01 | down |
| 6200265 | 7258670 | 1519346 | poly (ADP-ribose) polymerase family, member 11 | Parp11 | 500323 | 1,55 | up   |
| 5737758 | 7349772 | 1744447 | poly (ADP-ribose) polymerase family, member 3  | Parp3  | 300985 | 1,04 | up   |
| 5813323 | 7349772 | 1744456 | poly (ADP-ribose) polymerase family, member 3  | Parp3  | 300985 | 1,31 | down |
| 5879605 | 7349772 | 1744454 | poly (ADP-ribose) polymerase family, member 3  | Parp3  | 300985 | 2,22 | up   |
| 6056876 | 7349772 | 1744452 | poly (ADP-ribose) polymerase family, member 3  | Parp3  | 300985 | 1,23 | up   |
| 6265951 | 7349772 | 1744451 | poly (ADP-ribose) polymerase family, member 3  | Parp3  | 300985 | 1,36 | down |
| 6336567 | 7349772 | 1744455 | poly (ADP-ribose) polymerase family, member 3  | Parp3  | 300985 | 1,90 | up   |
| 6424654 | 7349772 | 1744448 | poly (ADP-ribose) polymerase family, member 3  | Parp3  | 300985 | 1,54 | up   |
| 6449820 | 7349772 | 1744453 | poly (ADP-ribose) polymerase family, member 3  | Parp3  | 300985 | 1,00 | up   |
| 6495486 | 7349772 | 1744450 | poly (ADP-ribose) polymerase family, member 3  | Parp3  | 300985 | 1,09 | up   |
| 6590515 | 7349772 | 1744449 | poly (ADP-ribose) polymerase family, member 3  | Parp3  | 300985 | 1,10 | down |
| 6701415 | 7349772 | 1744446 | poly (ADP-ribose) polymerase family, member 3  | Parp3  | 300985 | 1,94 | down |
| 5752835 | 7093806 | 1112155 | poly (ADP-ribose) polymerase family, member 9  | Parp9  | 303905 | 1,09 | up   |
| 5784855 | 7093806 | 1112163 | poly (ADP-ribose) polymerase family, member 9  | Parp9  | 303905 | 3,35 | down |
| 5798486 | 7093806 | 1112159 | poly (ADP-ribose) polymerase family, member 9  | Parp9  | 303905 | 1,64 | up   |
| 5885645 | 7093806 | 1112158 | poly (ADP-ribose) polymerase family, member 9  | Parp9  | 303905 | 1,47 | up   |
| 5951632 | 7093806 | 1112160 | poly (ADP-ribose) polymerase family, member 9  | Parp9  | 303905 | 1,54 | up   |
| 5991141 | 7093806 | 1112165 | poly (ADP-ribose) polymerase family, member 9  | Parp9  | 303905 | 1,57 | up   |
| 6004110 | 7093806 | 1112160 | poly (ADP-ribose) polymerase family, member 9  | Parp9  | 303905 | 1,31 | up   |
| 6165073 | 7093806 | 1112148 | poly (ADP-ribose) polymerase family, member 9  | Parp9  | 303905 | 1,18 | up   |
| 6168404 | 7093806 | 1112152 | poly (ADP-ribose) polymerase family, member 9  | Parp9  | 303905 | 1,78 | up   |
| 6207817 | 7093806 | 1112160 | poly (ADP-ribose) polymerase family, member 9  | Parp9  | 303905 | 1,35 | up   |
| 6246953 | 7093806 | 1112160 | poly (ADP-ribose) polymerase family, member 9  | Parp9  | 303905 | 1,17 | up   |
| 6289607 | 7093806 | 1112148 | poly (ADP-ribose) polymerase family, member 9  | Parp9  | 303905 | 1,21 | up   |
| 6310225 | 7093806 | 1112147 | poly (ADP-ribose) polymerase family, member 9  | Parp9  | 303905 | 4,31 | down |
| 6352468 | 7093806 | 1112148 | poly (ADP-ribose) polymerase family, member 9  | Parp9  | 303905 | 1,35 | up   |
| 6366690 | 7093806 | 1112150 | poly (ADP-ribose) polymerase family, member 9  | Parp9  | 303905 | 2,47 | up   |
| 6438646 | 7093806 | 1112164 | poly (ADP-ribose) polymerase family, member 9  | Parp9  | 303905 | 1,40 | up   |
| 6662237 | 7093806 | 1112157 | poly (ADP-ribose) polymerase family, member 9  | Parp9  | 303905 | 1,79 | up   |
| 5695018 | 7131764 | 1205858 | poly(A) binding protein, nuclear 1             | Pabpn1 | 116697 | 1,18 | down |
| 5775304 | 7131764 | 1205859 | poly(A) binding protein, nuclear 1             | Pabpn1 | 116697 | 1,07 | up   |
| 5899536 | 7131764 | 1205855 | poly(A) binding protein, nuclear 1             | Pabpn1 | 116697 | 1,07 | down |
| 5962845 | 7131764 | 1205857 | poly(A) binding protein, nuclear 1             | Pabpn1 | 116697 | 1,00 | up   |
| 6042890 | 7131764 | 1205854 | poly(A) binding protein, nuclear 1             | Pabpn1 | 116697 | 1,14 | up   |
| 6045247 | 7131764 | 1205856 | poly(A) binding protein, nuclear 1             | Pabpn1 | 116697 | 1,17 | down |
| 6134502 | 7131764 | 1205860 | poly(A) binding protein, nuclear 1             | Pabpn1 | 116697 | 1,04 | up   |
| 6307031 | 7131764 | 1205852 | poly(A) binding protein, nuclear 1             | Pabpn1 | 116697 | 2,13 | down |
| 6546449 | 7131764 | 1205852 | poly(A) binding protein, nuclear 1             | Pabpn1 | 116697 | 1,22 | up   |
| 5628544 | 7360213 | 1770145 | polycystic kidney and hepatic disease 1        | Pkhd1  | 301287 | 1,58 | up   |
| 5642717 | 7360213 | 1770162 | polycystic kidney and hepatic disease 1        | Pkhd1  | 301287 | 1,09 | down |
| 5699172 | 7360213 | 1770168 | polycystic kidney and hepatic disease 1        | Pkhd1  | 301287 | 1,41 | up   |
| 5725201 | 7360213 | 1770149 | polycystic kidney and hepatic disease 1        | Pkhd1  | 301287 | 1,09 | down |
| 5730047 | 7360213 | 1770162 | polycystic kidney and hepatic disease 1        | Pkhd1  | 301287 | 1,17 | up   |
| 5764445 | 7360213 | 1770184 | polycystic kidney and hepatic disease 1        | Pkhd1  | 301287 | 1,03 | up   |

|         |         |         |                                                |         |        |      |      |
|---------|---------|---------|------------------------------------------------|---------|--------|------|------|
| 5870509 | 7360213 | 1770173 | polycystic kidney and hepatic disease 1        | Pkhd1   | 301287 | 1,15 | down |
| 5901724 | 7360213 | 1770167 | polycystic kidney and hepatic disease 1        | Pkhd1   | 301287 | 1,10 | down |
| 5926350 | 7360213 | 1770148 | polycystic kidney and hepatic disease 1        | Pkhd1   | 301287 | 1,06 | up   |
| 5937480 | 7360213 | 1770179 | polycystic kidney and hepatic disease 1        | Pkhd1   | 301287 | 2,15 | down |
| 5961114 | 7360213 | 1770176 | polycystic kidney and hepatic disease 1        | Pkhd1   | 301287 | 1,22 | up   |
| 6022787 | 7360213 | 1770173 | polycystic kidney and hepatic disease 1        | Pkhd1   | 301287 | 1,13 | down |
| 6080879 | 7360213 | 1770178 | polycystic kidney and hepatic disease 1        | Pkhd1   | 301287 | 1,02 | down |
| 6118692 | 7360213 | 1770177 | polycystic kidney and hepatic disease 1        | Pkhd1   | 301287 | 1,05 | down |
| 6195484 | 7360213 | 1770146 | polycystic kidney and hepatic disease 1        | Pkhd1   | 301287 | 1,59 | up   |
| 6216745 | 7360213 | 1770152 | polycystic kidney and hepatic disease 1        | Pkhd1   | 301287 | 1,12 | up   |
| 6237985 | 7360213 | 1770172 | polycystic kidney and hepatic disease 1        | Pkhd1   | 301287 | 1,71 | up   |
| 6252616 | 7360213 | 1770168 | polycystic kidney and hepatic disease 1        | Pkhd1   | 301287 | 1,29 | down |
| 6324494 | 7360213 | 1770147 | polycystic kidney and hepatic disease 1        | Pkhd1   | 301287 | 1,53 | down |
| 6433624 | 7360213 | 1770151 | polycystic kidney and hepatic disease 1        | Pkhd1   | 301287 | 1,12 | up   |
| 6470549 | 7360213 | 1770149 | polycystic kidney and hepatic disease 1        | Pkhd1   | 301287 | 1,04 | up   |
| 6516141 | 7360213 | 1770185 | polycystic kidney and hepatic disease 1        | Pkhd1   | 301287 | 1,18 | down |
| 6552029 | 7360213 | 1770146 | polycystic kidney and hepatic disease 1        | Pkhd1   | 301287 | 1,06 | down |
| 6554331 | 7360213 | 1770180 | polycystic kidney and hepatic disease 1        | Pkhd1   | 301287 | 1,04 | up   |
| 6596211 | 7360213 | 1770182 | polycystic kidney and hepatic disease 1        | Pkhd1   | 301287 | 1,29 | down |
| 6628372 | 7360213 | 1770161 | polycystic kidney and hepatic disease 1        | Pkhd1   | 301287 | 1,21 | down |
| 6644880 | 7360213 | 1770150 | polycystic kidney and hepatic disease 1        | Pkhd1   | 301287 | 1,11 | down |
| 6648201 | 7360213 | 1770167 | polycystic kidney and hepatic disease 1        | Pkhd1   | 301287 | 1,21 | up   |
| 6716232 | 7360213 | 1770190 | polycystic kidney and hepatic disease 1        | Pkhd1   | 301287 | 1,04 | down |
| 5626049 | 7316644 | 1663989 | polycystic kidney and hepatic disease 1-like 1 | Pkhd111 | 314917 | 1,07 | up   |
| 5709379 | 7316644 | 1663995 | polycystic kidney and hepatic disease 1-like 1 | Pkhd111 | 314917 | 1,41 | up   |
| 5747029 | 7316644 | 1663993 | polycystic kidney and hepatic disease 1-like 1 | Pkhd111 | 314917 | 1,05 | down |
| 5757767 | 7316644 | 1663976 | polycystic kidney and hepatic disease 1-like 1 | Pkhd111 | 314917 | 1,16 | down |
| 5790995 | 7316644 | 1663976 | polycystic kidney and hepatic disease 1-like 1 | Pkhd111 | 314917 | 1,25 | down |
| 5831793 | 7316644 | 1663995 | polycystic kidney and hepatic disease 1-like 1 | Pkhd111 | 314917 | 1,47 | up   |
| 5876177 | 7316644 | 1663974 | polycystic kidney and hepatic disease 1-like 1 | Pkhd111 | 314917 | 1,17 | down |
| 5946549 | 7316644 | 1663992 | polycystic kidney and hepatic disease 1-like 1 | Pkhd111 | 314917 | 1,00 | down |
| 5955671 | 7316644 | 1663983 | polycystic kidney and hepatic disease 1-like 1 | Pkhd111 | 314917 | 1,54 | down |
| 6007944 | 7316644 | 1663979 | polycystic kidney and hepatic disease 1-like 1 | Pkhd111 | 314917 | 1,01 | up   |
| 6016054 | 7316644 | 1663994 | polycystic kidney and hepatic disease 1-like 1 | Pkhd111 | 314917 | 1,18 | up   |
| 6046748 | 7316644 | 1663996 | polycystic kidney and hepatic disease 1-like 1 | Pkhd111 | 314917 | 1,01 | down |
| 6052533 | 7316644 | 1663997 | polycystic kidney and hepatic disease 1-like 1 | Pkhd111 | 314917 | 1,01 | up   |
| 6060078 | 7316644 | 1663982 | polycystic kidney and hepatic disease 1-like 1 | Pkhd111 | 314917 | 1,00 | down |
| 6155958 | 7316644 | 1663990 | polycystic kidney and hepatic disease 1-like 1 | Pkhd111 | 314917 | 1,17 | up   |
| 6283804 | 7316644 | 1663988 | polycystic kidney and hepatic disease 1-like 1 | Pkhd111 | 314917 | 1,06 | up   |
| 6364388 | 7316644 | 1663980 | polycystic kidney and hepatic disease 1-like 1 | Pkhd111 | 314917 | 1,04 | down |
| 6584050 | 7316644 | 1663999 | polycystic kidney and hepatic disease 1-like 1 | Pkhd111 | 314917 | 1,01 | up   |
| 6631672 | 7316644 | 1663991 | polycystic kidney and hepatic disease 1-like 1 | Pkhd111 | 314917 | 1,36 | up   |
| 6665997 | 7316644 | 1663998 | polycystic kidney and hepatic disease 1-like 1 | Pkhd111 | 314917 | 1,10 | up   |
| 6681750 | 7316644 | 1663981 | polycystic kidney and hepatic disease 1-like 1 | Pkhd111 | 314917 | 1,27 | down |
| 6721496 | 7316644 | 1663991 | polycystic kidney and hepatic disease 1-like 1 | Pkhd111 | 314917 | 1,21 | up   |
| 5617874 | 7269314 | 1545624 | polyhomeotic-like 1 (Drosophila)               | Phc1    | 312690 | 1,52 | down |
| 5661875 | 7269314 | 1545618 | polyhomeotic-like 1 (Drosophila)               | Phc1    | 312690 | 1,03 | up   |
| 5697607 | 7269314 | 1545614 | polyhomeotic-like 1 (Drosophila)               | Phc1    | 312690 | 1,10 | down |
| 5749861 | 7269314 | 1545623 | polyhomeotic-like 1 (Drosophila)               | Phc1    | 312690 | 1,44 | down |
| 5824038 | 7269314 | 1545613 | polyhomeotic-like 1 (Drosophila)               | Phc1    | 312690 | 1,16 | down |
| 5845682 | 7269314 | 1545610 | polyhomeotic-like 1 (Drosophila)               | Phc1    | 312690 | 1,15 | up   |
| 5983032 | 7269314 | 1545609 | polyhomeotic-like 1 (Drosophila)               | Phc1    | 312690 | 1,15 | down |
| 5983873 | 7269314 | 1545616 | polyhomeotic-like 1 (Drosophila)               | Phc1    | 312690 | 1,28 | down |
| 5985461 | 7269314 | 1545624 | polyhomeotic-like 1 (Drosophila)               | Phc1    | 312690 | 1,11 | up   |
| 6043126 | 7269314 | 1545612 | polyhomeotic-like 1 (Drosophila)               | Phc1    | 312690 | 1,68 | up   |
| 6138072 | 7269314 | 1545616 | polyhomeotic-like 1 (Drosophila)               | Phc1    | 312690 | 1,18 | up   |

|         |         |         |                                    |      |        |      |      |
|---------|---------|---------|------------------------------------|------|--------|------|------|
| 6195935 | 7269314 | 1545618 | polyhomeotic-like 1 (Drosophila)   | Phc1 | 312690 | 1,56 | down |
| 6221589 | 7269314 | 1545617 | polyhomeotic-like 1 (Drosophila)   | Phc1 | 312690 | 1,15 | up   |
| 6230395 | 7269314 | 1545620 | polyhomeotic-like 1 (Drosophila)   | Phc1 | 312690 | 1,31 | up   |
| 6284963 | 7269314 | 1545614 | polyhomeotic-like 1 (Drosophila)   | Phc1 | 312690 | 1,89 | up   |
| 6306820 | 7269314 | 1545611 | polyhomeotic-like 1 (Drosophila)   | Phc1 | 312690 | 1,07 | down |
| 6324719 | 7269314 | 1545616 | polyhomeotic-like 1 (Drosophila)   | Phc1 | 312690 | 1,00 | down |
| 6328268 | 7269314 | 1545615 | polyhomeotic-like 1 (Drosophila)   | Phc1 | 312690 | 1,06 | up   |
| 6447438 | 7269314 | 1545621 | polyhomeotic-like 1 (Drosophila)   | Phc1 | 312690 | 1,12 | down |
| 6584425 | 7269314 | 1545616 | polyhomeotic-like 1 (Drosophila)   | Phc1 | 312690 | 2,79 | down |
| 6610160 | 7269314 | 1545622 | polyhomeotic-like 1 (Drosophila)   | Phc1 | 312690 | 1,28 | up   |
| 6619619 | 7269314 | 1545609 | polyhomeotic-like 1 (Drosophila)   | Phc1 | 312690 | 1,05 | down |
| 6675072 | 7269314 | 1545623 | polyhomeotic-like 1 (Drosophila)   | Phc1 | 312690 | 1,25 | down |
| 6699035 | 7269314 | 1545616 | polyhomeotic-like 1 (Drosophila)   | Phc1 | 312690 | 1,39 | up   |
| 5684715 | 7103337 | 1135942 | polymerase (DNA directed), epsilon | Pole | 304573 | 1,26 | down |
| 5724937 | 7103337 | 1135979 | polymerase (DNA directed), epsilon | Pole | 304573 | 1,17 | up   |
| 5763878 | 7103337 | 1135962 | polymerase (DNA directed), epsilon | Pole | 304573 | 1,50 | up   |
| 5774810 | 7103337 | 1135953 | polymerase (DNA directed), epsilon | Pole | 304573 | 1,07 | up   |
| 5781681 | 7103337 | 1135981 | polymerase (DNA directed), epsilon | Pole | 304573 | 1,09 | up   |
| 5804254 | 7103337 | 1135951 | polymerase (DNA directed), epsilon | Pole | 304573 | 1,05 | up   |
| 5818490 | 7103337 | 1135937 | polymerase (DNA directed), epsilon | Pole | 304573 | 1,36 | up   |
| 5874239 | 7103337 | 1135957 | polymerase (DNA directed), epsilon | Pole | 304573 | 1,74 | up   |
| 5875853 | 7103337 | 1135935 | polymerase (DNA directed), epsilon | Pole | 304573 | 1,08 | up   |
| 5891244 | 7103337 | 1135953 | polymerase (DNA directed), epsilon | Pole | 304573 | 1,47 | down |
| 5928543 | 7103337 | 1135948 | polymerase (DNA directed), epsilon | Pole | 304573 | 1,51 | down |
| 5949004 | 7103337 | 1135968 | polymerase (DNA directed), epsilon | Pole | 304573 | 1,37 | down |
| 5954660 | 7103337 | 1135935 | polymerase (DNA directed), epsilon | Pole | 304573 | 1,11 | up   |
| 6020458 | 7103337 | 1135973 | polymerase (DNA directed), epsilon | Pole | 304573 | 1,55 | down |
| 6020617 | 7103337 | 1135984 | polymerase (DNA directed), epsilon | Pole | 304573 | 1,29 | up   |
| 6054606 | 7103337 | 1135976 | polymerase (DNA directed), epsilon | Pole | 304573 | 1,01 | down |
| 6078996 | 7103337 | 1135988 | polymerase (DNA directed), epsilon | Pole | 304573 | 1,19 | up   |
| 6107896 | 7103337 | 1135969 | polymerase (DNA directed), epsilon | Pole | 304573 | 1,04 | up   |
| 6121823 | 7103337 | 1135942 | polymerase (DNA directed), epsilon | Pole | 304573 | 1,74 | up   |
| 6122617 | 7103337 | 1135965 | polymerase (DNA directed), epsilon | Pole | 304573 | 1,61 | down |
| 6125369 | 7103337 | 1135938 | polymerase (DNA directed), epsilon | Pole | 304573 | 1,53 | down |
| 6126515 | 7103337 | 1135948 | polymerase (DNA directed), epsilon | Pole | 304573 | 1,21 | down |
| 6137174 | 7103337 | 1135942 | polymerase (DNA directed), epsilon | Pole | 304573 | 1,66 | down |
| 6216468 | 7103337 | 1135971 | polymerase (DNA directed), epsilon | Pole | 304573 | 1,87 | down |
| 6219328 | 7103337 | 1135980 | polymerase (DNA directed), epsilon | Pole | 304573 | 1,14 | up   |
| 6221978 | 7103337 | 1135960 | polymerase (DNA directed), epsilon | Pole | 304573 | 1,15 | up   |
| 6273454 | 7103337 | 1135977 | polymerase (DNA directed), epsilon | Pole | 304573 | 1,70 | down |
| 6276645 | 7103337 | 1135966 | polymerase (DNA directed), epsilon | Pole | 304573 | 1,09 | up   |
| 6291115 | 7103337 | 1135956 | polymerase (DNA directed), epsilon | Pole | 304573 | 1,08 | down |
| 6305860 | 7103337 | 1135974 | polymerase (DNA directed), epsilon | Pole | 304573 | 1,03 | down |
| 6313601 | 7103337 | 1135959 | polymerase (DNA directed), epsilon | Pole | 304573 | 1,00 | up   |
| 6333894 | 7103337 | 1135936 | polymerase (DNA directed), epsilon | Pole | 304573 | 1,71 | down |
| 6339142 | 7103337 | 1135975 | polymerase (DNA directed), epsilon | Pole | 304573 | 1,04 | down |
| 6371351 | 7103337 | 1135970 | polymerase (DNA directed), epsilon | Pole | 304573 | 1,06 | up   |
| 6388939 | 7103337 | 1135952 | polymerase (DNA directed), epsilon | Pole | 304573 | 1,03 | up   |
| 6392333 | 7103337 | 1135967 | polymerase (DNA directed), epsilon | Pole | 304573 | 1,20 | down |
| 6397659 | 7103337 | 1135985 | polymerase (DNA directed), epsilon | Pole | 304573 | 1,31 | down |
| 6407657 | 7103337 | 1135983 | polymerase (DNA directed), epsilon | Pole | 304573 | 1,04 | down |
| 6414395 | 7103337 | 1135977 | polymerase (DNA directed), epsilon | Pole | 304573 | 1,02 | up   |
| 6441996 | 7103337 | 1135950 | polymerase (DNA directed), epsilon | Pole | 304573 | 1,44 | down |
| 6480457 | 7103337 | 1135961 | polymerase (DNA directed), epsilon | Pole | 304573 | 1,08 | up   |
| 6506592 | 7103337 | 1135940 | polymerase (DNA directed), epsilon | Pole | 304573 | 1,10 | down |
| 6521657 | 7103337 | 1135945 | polymerase (DNA directed), epsilon | Pole | 304573 | 1,00 | up   |

|         |         |         |                                                            |        |        |      |      |
|---------|---------|---------|------------------------------------------------------------|--------|--------|------|------|
| 6547838 | 7103337 | 1135971 | polymerase (DNA directed), epsilon                         | Pole   | 304573 | 1,08 | down |
| 6557768 | 7103337 | 1135954 | polymerase (DNA directed), epsilon                         | Pole   | 304573 | 1,01 | up   |
| 6591357 | 7103337 | 1135982 | polymerase (DNA directed), epsilon                         | Pole   | 304573 | 1,92 | down |
| 6642847 | 7103337 | 1135986 | polymerase (DNA directed), epsilon                         | Pole   | 304573 | 1,96 | down |
| 6657513 | 7103337 | 1135939 | polymerase (DNA directed), epsilon                         | Pole   | 304573 | 1,38 | down |
| 6688912 | 7103337 | 1135972 | polymerase (DNA directed), epsilon                         | Pole   | 304573 | 1,08 | up   |
| 6696493 | 7103337 | 1135958 | polymerase (DNA directed), epsilon                         | Pole   | 304573 | 1,06 | up   |
| 6700296 | 7103337 | 1135938 | polymerase (DNA directed), epsilon                         | Pole   | 304573 | 1,36 | down |
| 6707339 | 7103337 | 1135949 | polymerase (DNA directed), epsilon                         | Pole   | 304573 | 1,05 | up   |
| 6733766 | 7103337 | 1135978 | polymerase (DNA directed), epsilon                         | Pole   | 304573 | 1,11 | up   |
| 5665627 | 7232482 | 1453963 | polymerase (RNA) I polypeptide B                           | Polr1b | 83582  | 1,27 | up   |
| 5737487 | 7232482 | 1453951 | polymerase (RNA) I polypeptide B                           | Polr1b | 83582  | 1,11 | down |
| 5788480 | 7232482 | 1453950 | polymerase (RNA) I polypeptide B                           | Polr1b | 83582  | 1,42 | down |
| 5802346 | 7232482 | 1453955 | polymerase (RNA) I polypeptide B                           | Polr1b | 83582  | 1,16 | down |
| 5802804 | 7232482 | 1453954 | polymerase (RNA) I polypeptide B                           | Polr1b | 83582  | 2,06 | up   |
| 5822888 | 7232482 | 1453959 | polymerase (RNA) I polypeptide B                           | Polr1b | 83582  | 1,07 | down |
| 5893491 | 7232482 | 1453963 | polymerase (RNA) I polypeptide B                           | Polr1b | 83582  | 1,32 | up   |
| 5967469 | 7232482 | 1453952 | polymerase (RNA) I polypeptide B                           | Polr1b | 83582  | 1,19 | down |
| 5970957 | 7232482 | 1453954 | polymerase (RNA) I polypeptide B                           | Polr1b | 83582  | 1,10 | down |
| 6012758 | 7232482 | 1453956 | polymerase (RNA) I polypeptide B                           | Polr1b | 83582  | 1,27 | down |
| 6166373 | 7232482 | 1453949 | polymerase (RNA) I polypeptide B                           | Polr1b | 83582  | 1,09 | down |
| 6300396 | 7232482 | 1453962 | polymerase (RNA) I polypeptide B                           | Polr1b | 83582  | 1,20 | down |
| 6301400 | 7232482 | 1453958 | polymerase (RNA) I polypeptide B                           | Polr1b | 83582  | 1,34 | up   |
| 6382244 | 7232482 | 1453953 | polymerase (RNA) I polypeptide B                           | Polr1b | 83582  | 2,09 | up   |
| 6415438 | 7232482 | 1453957 | polymerase (RNA) I polypeptide B                           | Polr1b | 83582  | 1,11 | up   |
| 6433546 | 7232482 | 1453961 | polymerase (RNA) I polypeptide B                           | Polr1b | 83582  | 1,30 | up   |
| 6468984 | 7232482 | 1453960 | polymerase (RNA) I polypeptide B                           | Polr1b | 83582  | 1,51 | up   |
| 6469828 | 7232482 | 1453964 | polymerase (RNA) I polypeptide B                           | Polr1b | 83582  | 1,72 | down |
| 6528376 | 7232482 | 1453957 | polymerase (RNA) I polypeptide B                           | Polr1b | 83582  | 1,06 | down |
| 5710803 | 7330078 | 1695462 | polymerase (RNA) III (DNA directed) polypeptide H (22.9kD) | Polr3h | 300088 | 1,06 | down |
| 5724051 | 7330078 | 1695462 | polymerase (RNA) III (DNA directed) polypeptide H (22.9kD) | Polr3h | 300088 | 1,33 | up   |
| 5887079 | 7330078 | 1695466 | polymerase (RNA) III (DNA directed) polypeptide H (22.9kD) | Polr3h | 300088 | 1,33 | down |
| 6185209 | 7330078 | 1695470 | polymerase (RNA) III (DNA directed) polypeptide H (22.9kD) | Polr3h | 300088 | 1,07 | up   |
| 6499088 | 7330078 | 1695467 | polymerase (RNA) III (DNA directed) polypeptide H (22.9kD) | Polr3h | 300088 | 1,47 | up   |
| 6545078 | 7330078 | 1695464 | polymerase (RNA) III (DNA directed) polypeptide H (22.9kD) | Polr3h | 300088 | 1,03 | down |
| 6571373 | 7330078 | 1695468 | polymerase (RNA) III (DNA directed) polypeptide H (22.9kD) | Polr3h | 300088 | 1,17 | down |
| 6686250 | 7330078 | 1695463 | polymerase (RNA) III (DNA directed) polypeptide H (22.9kD) | Polr3h | 300088 | 2,55 | up   |
| 6704473 | 7330078 | 1695470 | polymerase (RNA) III (DNA directed) polypeptide H (22.9kD) | Polr3h | 300088 | 1,39 | up   |
| 6725766 | 7330078 | 1695462 | polymerase (RNA) III (DNA directed) polypeptide H (22.9kD) | Polr3h | 300088 | 1,01 | up   |
| 5649234 | 7312621 | 1653460 | polymerase (RNA) mitochondrial (DNA directed)              | Polrmt | 299604 | 1,28 | down |
| 5686373 | 7312621 | 1653453 | polymerase (RNA) mitochondrial (DNA directed)              | Polrmt | 299604 | 1,37 | up   |
| 5691829 | 7312621 | 1653463 | polymerase (RNA) mitochondrial (DNA directed)              | Polrmt | 299604 | 1,12 | down |
| 5705983 | 7312621 | 1653462 | polymerase (RNA) mitochondrial (DNA directed)              | Polrmt | 299604 | 1,32 | down |
| 5707941 | 7312621 | 1653450 | polymerase (RNA) mitochondrial (DNA directed)              | Polrmt | 299604 | 1,24 | down |
| 5756521 | 7312621 | 1653460 | polymerase (RNA) mitochondrial (DNA directed)              | Polrmt | 299604 | 1,37 | down |
| 5794660 | 7312621 | 1653459 | polymerase (RNA) mitochondrial (DNA directed)              | Polrmt | 299604 | 1,19 | up   |
| 5802003 | 7312621 | 1653454 | polymerase (RNA) mitochondrial (DNA directed)              | Polrmt | 299604 | 1,14 | up   |
| 5818308 | 7312621 | 1653457 | polymerase (RNA) mitochondrial (DNA directed)              | Polrmt | 299604 | 1,03 | up   |
| 5926671 | 7312621 | 1653461 | polymerase (RNA) mitochondrial (DNA directed)              | Polrmt | 299604 | 1,07 | up   |
| 5951440 | 7312621 | 1653448 | polymerase (RNA) mitochondrial (DNA directed)              | Polrmt | 299604 | 1,11 | up   |
| 6114182 | 7312621 | 1653456 | polymerase (RNA) mitochondrial (DNA directed)              | Polrmt | 299604 | 1,39 | up   |
| 6123696 | 7312621 | 1653449 | polymerase (RNA) mitochondrial (DNA directed)              | Polrmt | 299604 | 1,09 | up   |
| 6226703 | 7312621 | 1653459 | polymerase (RNA) mitochondrial (DNA directed)              | Polrmt | 299604 | 1,12 | down |
| 6318639 | 7312621 | 1653461 | polymerase (RNA) mitochondrial (DNA directed)              | Polrmt | 299604 | 1,06 | down |
| 6540231 | 7312621 | 1653461 | polymerase (RNA) mitochondrial (DNA directed)              | Polrmt | 299604 | 1,27 | up   |
| 6621145 | 7312621 | 1653455 | polymerase (RNA) mitochondrial (DNA directed)              | Polrmt | 299604 | 1,07 | up   |



|         |         |         |                                                                                 |        |        |      |      |
|---------|---------|---------|---------------------------------------------------------------------------------|--------|--------|------|------|
| 6666287 | 7312621 | 1653452 | polymerase (RNA) mitochondrial (DNA directed)                                   | Polrmt | 299604 | 2,24 | down |
| 6679035 | 7312621 | 1653458 | polymerase (RNA) mitochondrial (DNA directed)                                   | Polrmt | 299604 | 1,03 | down |
| 6684887 | 7312621 | 1653461 | polymerase (RNA) mitochondrial (DNA directed)                                   | Polrmt | 299604 | 1,03 | down |
| 6722750 | 7312621 | 1653451 | polymerase (RNA) mitochondrial (DNA directed)                                   | Polrmt | 299604 | 1,77 | up   |
| 5744509 | 7373634 | 1805731 | porcupine homolog (Drosophila)                                                  | Porcn  | 317368 | 1,39 | down |
| 5780688 | 7373634 | 1805728 | porcupine homolog (Drosophila)                                                  | Porcn  | 317368 | 1,22 | up   |
| 5788828 | 7373634 | 1805727 | porcupine homolog (Drosophila)                                                  | Porcn  | 317368 | 1,18 | down |
| 5863258 | 7373634 | 1805722 | porcupine homolog (Drosophila)                                                  | Porcn  | 317368 | 1,18 | up   |
| 6081624 | 7373634 | 1805731 | porcupine homolog (Drosophila)                                                  | Porcn  | 317368 | 1,11 | down |
| 6126419 | 7373634 | 1805720 | porcupine homolog (Drosophila)                                                  | Porcn  | 317368 | 1,38 | down |
| 6140592 | 7373634 | 1805727 | porcupine homolog (Drosophila)                                                  | Porcn  | 317368 | 1,20 | down |
| 6259183 | 7373634 | 1805721 | porcupine homolog (Drosophila)                                                  | Porcn  | 317368 | 1,10 | up   |
| 6286449 | 7373634 | 1805723 | porcupine homolog (Drosophila)                                                  | Porcn  | 317368 | 1,10 | down |
| 6412675 | 7373634 | 1805726 | porcupine homolog (Drosophila)                                                  | Porcn  | 317368 | 2,38 | down |
| 6522420 | 7373634 | 1805730 | porcupine homolog (Drosophila)                                                  | Porcn  | 317368 | 1,01 | up   |
| 6589199 | 7373634 | 1805731 | porcupine homolog (Drosophila)                                                  | Porcn  | 317368 | 1,67 | down |
| 6692294 | 7373634 | 1805721 | porcupine homolog (Drosophila)                                                  | Porcn  | 317368 | 1,31 | up   |
| 5846447 | 7217269 | 1415908 | potassium channel tetramerisation domain containing 20                          | Kctd20 | 294307 | 1,24 | up   |
| 5897750 | 7217269 | 1415909 | potassium channel tetramerisation domain containing 20                          | Kctd20 | 294307 | 1,03 | down |
| 5952374 | 7217269 | 1415912 | potassium channel tetramerisation domain containing 20                          | Kctd20 | 294307 | 1,16 | down |
| 6155974 | 7217269 | 1415910 | potassium channel tetramerisation domain containing 20                          | Kctd20 | 294307 | 1,11 | up   |
| 6179978 | 7217269 | 1415908 | potassium channel tetramerisation domain containing 20                          | Kctd20 | 294307 | 1,10 | up   |
| 6195243 | 7217269 | 1415904 | potassium channel tetramerisation domain containing 20                          | Kctd20 | 294307 | 1,06 | up   |
| 6197938 | 7217269 | 1415908 | potassium channel tetramerisation domain containing 20                          | Kctd20 | 294307 | 1,22 | up   |
| 6228305 | 7217269 | 1415913 | potassium channel tetramerisation domain containing 20                          | Kctd20 | 294307 | 1,26 | up   |
| 6282014 | 7217269 | 1415913 | potassium channel tetramerisation domain containing 20                          | Kctd20 | 294307 | 1,22 | up   |
| 6431839 | 7217269 | 1415911 | potassium channel tetramerisation domain containing 20                          | Kctd20 | 294307 | 1,08 | down |
| 5917462 | 7101564 | 1131398 | potassium channel tetramerisation domain containing 7                           | Kctd7  | 688993 | 1,22 | down |
| 6110152 | 7101564 | 1131395 | potassium channel tetramerisation domain containing 7                           | Kctd7  | 688993 | 1,14 | down |
| 6357550 | 7101564 | 1131392 | potassium channel tetramerisation domain containing 7                           | Kctd7  | 688993 | 1,15 | down |
| 6421119 | 7101564 | 1131399 | potassium channel tetramerisation domain containing 7                           | Kctd7  | 688993 | 1,28 | up   |
| 6429695 | 7101564 | 1131394 | potassium channel tetramerisation domain containing 7                           | Kctd7  | 688993 | 1,42 | down |
| 6473595 | 7101564 | 1131399 | potassium channel tetramerisation domain containing 7                           | Kctd7  | 688993 | 1,16 | down |
| 6496588 | 7101564 | 1131393 | potassium channel tetramerisation domain containing 7                           | Kctd7  | 688993 | 1,08 | up   |
| 5633112 | 7029611 | 959795  | potassium intermediate/small conductance calcium-activated channel, subfamily 1 | Kcnn4  | 65206  | 1,01 | down |
| 5723210 | 7029611 | 959797  | potassium intermediate/small conductance calcium-activated channel, subfamily 1 | Kcnn4  | 65206  | 1,06 | up   |
| 5910594 | 7029611 | 959793  | potassium intermediate/small conductance calcium-activated channel, subfamily 1 | Kcnn4  | 65206  | 1,26 | up   |
| 6015484 | 7029611 | 959790  | potassium intermediate/small conductance calcium-activated channel, subfamily 1 | Kcnn4  | 65206  | 1,04 | down |
| 6124358 | 7029611 | 959797  | potassium intermediate/small conductance calcium-activated channel, subfamily 1 | Kcnn4  | 65206  | 1,02 | down |
| 6125672 | 7029611 | 959797  | potassium intermediate/small conductance calcium-activated channel, subfamily 1 | Kcnn4  | 65206  | 1,00 | up   |
| 6153899 | 7029611 | 959797  | potassium intermediate/small conductance calcium-activated channel, subfamily 1 | Kcnn4  | 65206  | 1,91 | down |
| 6206243 | 7029611 | 959791  | potassium intermediate/small conductance calcium-activated channel, subfamily 1 | Kcnn4  | 65206  | 1,14 | up   |
| 6299660 | 7029611 | 959796  | potassium intermediate/small conductance calcium-activated channel, subfamily 1 | Kcnn4  | 65206  | 1,07 | down |
| 6438071 | 7029611 | 959789  | potassium intermediate/small conductance calcium-activated channel, subfamily 1 | Kcnn4  | 65206  | 1,45 | up   |
| 6461778 | 7029611 | 959797  | potassium intermediate/small conductance calcium-activated channel, subfamily 1 | Kcnn4  | 65206  | 1,17 | down |
| 6535255 | 7029611 | 959794  | potassium intermediate/small conductance calcium-activated channel, subfamily 1 | Kcnn4  | 65206  | 1,23 | down |
| 6641487 | 7029611 | 959792  | potassium intermediate/small conductance calcium-activated channel, subfamily 1 | Kcnn4  | 65206  | 1,01 | up   |
| 6713921 | 7029611 | 959796  | potassium intermediate/small conductance calcium-activated channel, subfamily 1 | Kcnn4  | 65206  | 2,42 | up   |
| 5703978 | 7247687 | 1491775 | potassium voltage-gated channel, delayed-rectifier, subfamily S, member 1       | Kcns1  | 117023 | 1,01 | up   |
| 5716422 | 7247687 | 1491776 | potassium voltage-gated channel, delayed-rectifier, subfamily S, member 1       | Kcns1  | 117023 | 1,08 | down |
| 5886617 | 7247687 | 1491778 | potassium voltage-gated channel, delayed-rectifier, subfamily S, member 1       | Kcns1  | 117023 | 1,59 | up   |
| 5900657 | 7247687 | 1491776 | potassium voltage-gated channel, delayed-rectifier, subfamily S, member 1       | Kcns1  | 117023 | 1,43 | up   |
| 6427365 | 7247687 | 1491779 | potassium voltage-gated channel, delayed-rectifier, subfamily S, member 1       | Kcns1  | 117023 | 1,07 | up   |
| 6462005 | 7247687 | 1491777 | potassium voltage-gated channel, delayed-rectifier, subfamily S, member 1       | Kcns1  | 117023 | 2,53 | down |
| 6486391 | 7247687 | 1491777 | potassium voltage-gated channel, delayed-rectifier, subfamily S, member 1       | Kcns1  | 117023 | 1,59 | down |
| 5635713 | 7194678 | 1362480 | potassium voltage-gated channel, shaker-related subfamily, beta member 1        | Kcnab1 | 29737  | 1,10 | up   |

|         |         |         |                                                                          |        |        |      |      |
|---------|---------|---------|--------------------------------------------------------------------------|--------|--------|------|------|
| 5639913 | 7194678 | 1362471 | potassium voltage-gated channel, shaker-related subfamily, beta member 1 | Kcnab1 | 29737  | 2,15 | down |
| 5675388 | 7194678 | 1362482 | potassium voltage-gated channel, shaker-related subfamily, beta member 1 | Kcnab1 | 29737  | 1,02 | down |
| 5792562 | 7194678 | 1362477 | potassium voltage-gated channel, shaker-related subfamily, beta member 1 | Kcnab1 | 29737  | 1,06 | up   |
| 6062642 | 7194678 | 1362478 | potassium voltage-gated channel, shaker-related subfamily, beta member 1 | Kcnab1 | 29737  | 1,05 | up   |
| 6094245 | 7194678 | 1362472 | potassium voltage-gated channel, shaker-related subfamily, beta member 1 | Kcnab1 | 29737  | 1,05 | up   |
| 6117006 | 7194678 | 1362470 | potassium voltage-gated channel, shaker-related subfamily, beta member 1 | Kcnab1 | 29737  | 1,20 | up   |
| 6215749 | 7194678 | 1362469 | potassium voltage-gated channel, shaker-related subfamily, beta member 1 | Kcnab1 | 29737  | 1,16 | up   |
| 6326439 | 7194678 | 1362481 | potassium voltage-gated channel, shaker-related subfamily, beta member 1 | Kcnab1 | 29737  | 1,20 | up   |
| 6341014 | 7194678 | 1362476 | potassium voltage-gated channel, shaker-related subfamily, beta member 1 | Kcnab1 | 29737  | 1,53 | down |
| 6414912 | 7194678 | 1362479 | potassium voltage-gated channel, shaker-related subfamily, beta member 1 | Kcnab1 | 29737  | 1,45 | down |
| 6431685 | 7194678 | 1362473 | potassium voltage-gated channel, shaker-related subfamily, beta member 1 | Kcnab1 | 29737  | 1,08 | down |
| 6495586 | 7194678 | 1362474 | potassium voltage-gated channel, shaker-related subfamily, beta member 1 | Kcnab1 | 29737  | 1,19 | up   |
| 6629317 | 7194678 | 1362483 | potassium voltage-gated channel, shaker-related subfamily, beta member 1 | Kcnab1 | 29737  | 1,75 | down |
| 6682553 | 7194678 | 1362475 | potassium voltage-gated channel, shaker-related subfamily, beta member 1 | Kcnab1 | 29737  | 1,37 | up   |
| 5649397 | 7303009 | 1629518 | potassium voltage-gated channel, subfamily G, member 3                   | Kcng3  | 171011 | 1,70 | up   |
| 5708402 | 7303009 | 1629519 | potassium voltage-gated channel, subfamily G, member 3                   | Kcng3  | 171011 | 1,16 | up   |
| 5754024 | 7303009 | 1629518 | potassium voltage-gated channel, subfamily G, member 3                   | Kcng3  | 171011 | 1,21 | up   |
| 5844261 | 7303009 | 1629519 | potassium voltage-gated channel, subfamily G, member 3                   | Kcng3  | 171011 | 1,04 | down |
| 5972681 | 7303009 | 1629519 | potassium voltage-gated channel, subfamily G, member 3                   | Kcng3  | 171011 | 4,32 | down |
| 5753596 | 7320620 | 1673897 | potassium voltage-gated channel, subfamily H (eag-related), member 3     | Kcqh3  | 27150  | 1,23 | up   |
| 5785589 | 7320620 | 1673889 | potassium voltage-gated channel, subfamily H (eag-related), member 3     | Kcqh3  | 27150  | 2,20 | up   |
| 5824231 | 7320620 | 1673894 | potassium voltage-gated channel, subfamily H (eag-related), member 3     | Kcqh3  | 27150  | 1,34 | up   |
| 5845843 | 7320620 | 1673897 | potassium voltage-gated channel, subfamily H (eag-related), member 3     | Kcqh3  | 27150  | 1,29 | up   |
| 5981434 | 7320620 | 1673892 | potassium voltage-gated channel, subfamily H (eag-related), member 3     | Kcqh3  | 27150  | 1,24 | up   |
| 6001266 | 7320620 | 1673885 | potassium voltage-gated channel, subfamily H (eag-related), member 3     | Kcqh3  | 27150  | 1,30 | up   |
| 6028656 | 7320620 | 1673895 | potassium voltage-gated channel, subfamily H (eag-related), member 3     | Kcqh3  | 27150  | 1,12 | up   |
| 6113490 | 7320620 | 1673898 | potassium voltage-gated channel, subfamily H (eag-related), member 3     | Kcqh3  | 27150  | 1,08 | down |
| 6147106 | 7320620 | 1673897 | potassium voltage-gated channel, subfamily H (eag-related), member 3     | Kcqh3  | 27150  | 1,34 | down |
| 6153946 | 7320620 | 1673890 | potassium voltage-gated channel, subfamily H (eag-related), member 3     | Kcqh3  | 27150  | 1,58 | down |
| 6252741 | 7320620 | 1673883 | potassium voltage-gated channel, subfamily H (eag-related), member 3     | Kcqh3  | 27150  | 1,01 | up   |
| 6268533 | 7320620 | 1673888 | potassium voltage-gated channel, subfamily H (eag-related), member 3     | Kcqh3  | 27150  | 1,20 | down |
| 6289024 | 7320620 | 1673897 | potassium voltage-gated channel, subfamily H (eag-related), member 3     | Kcqh3  | 27150  | 1,04 | down |
| 6305849 | 7320620 | 1673895 | potassium voltage-gated channel, subfamily H (eag-related), member 3     | Kcqh3  | 27150  | 1,18 | up   |
| 6408283 | 7320620 | 1673896 | potassium voltage-gated channel, subfamily H (eag-related), member 3     | Kcqh3  | 27150  | 2,09 | down |
| 6409449 | 7320620 | 1673897 | potassium voltage-gated channel, subfamily H (eag-related), member 3     | Kcqh3  | 27150  | 1,38 | down |
| 6437375 | 7320620 | 1673884 | potassium voltage-gated channel, subfamily H (eag-related), member 3     | Kcqh3  | 27150  | 1,73 | up   |
| 6477970 | 7320620 | 1673893 | potassium voltage-gated channel, subfamily H (eag-related), member 3     | Kcqh3  | 27150  | 1,19 | up   |
| 6505191 | 7320620 | 1673894 | potassium voltage-gated channel, subfamily H (eag-related), member 3     | Kcqh3  | 27150  | 1,01 | up   |
| 6530626 | 7320620 | 1673886 | potassium voltage-gated channel, subfamily H (eag-related), member 3     | Kcqh3  | 27150  | 1,05 | up   |
| 6532530 | 7320620 | 1673891 | potassium voltage-gated channel, subfamily H (eag-related), member 3     | Kcqh3  | 27150  | 1,53 | up   |
| 6687785 | 7320620 | 1673887 | potassium voltage-gated channel, subfamily H (eag-related), member 3     | Kcqh3  | 27150  | 1,06 | down |
| 5628277 | 7082741 | 1085562 | potassium voltage-gated channel, subfamily H (eag-related), member 4     | Kcqh4  | 114032 | 1,16 | up   |
| 5652238 | 7082741 | 1085555 | potassium voltage-gated channel, subfamily H (eag-related), member 4     | Kcqh4  | 114032 | 1,25 | up   |
| 5712226 | 7082741 | 1085565 | potassium voltage-gated channel, subfamily H (eag-related), member 4     | Kcqh4  | 114032 | 1,11 | down |
| 5807642 | 7082741 | 1085564 | potassium voltage-gated channel, subfamily H (eag-related), member 4     | Kcqh4  | 114032 | 1,04 | up   |
| 5930860 | 7082741 | 1085558 | potassium voltage-gated channel, subfamily H (eag-related), member 4     | Kcqh4  | 114032 | 1,05 | down |
| 5940448 | 7082741 | 1085553 | potassium voltage-gated channel, subfamily H (eag-related), member 4     | Kcqh4  | 114032 | 1,12 | up   |
| 6042721 | 7082741 | 1085556 | potassium voltage-gated channel, subfamily H (eag-related), member 4     | Kcqh4  | 114032 | 1,17 | down |
| 6281865 | 7082741 | 1085556 | potassium voltage-gated channel, subfamily H (eag-related), member 4     | Kcqh4  | 114032 | 1,02 | up   |
| 6324496 | 7082741 | 1085560 | potassium voltage-gated channel, subfamily H (eag-related), member 4     | Kcqh4  | 114032 | 1,06 | up   |
| 6348417 | 7082741 | 1085551 | potassium voltage-gated channel, subfamily H (eag-related), member 4     | Kcqh4  | 114032 | 1,25 | up   |
| 6351160 | 7082741 | 1085554 | potassium voltage-gated channel, subfamily H (eag-related), member 4     | Kcqh4  | 114032 | 1,17 | up   |
| 6362908 | 7082741 | 1085567 | potassium voltage-gated channel, subfamily H (eag-related), member 4     | Kcqh4  | 114032 | 1,03 | up   |
| 6408923 | 7082741 | 1085552 | potassium voltage-gated channel, subfamily H (eag-related), member 4     | Kcqh4  | 114032 | 1,86 | down |
| 6460721 | 7082741 | 1085553 | potassium voltage-gated channel, subfamily H (eag-related), member 4     | Kcqh4  | 114032 | 1,03 | down |
| 6470717 | 7082741 | 1085556 | potassium voltage-gated channel, subfamily H (eag-related), member 4     | Kcqh4  | 114032 | 1,34 | down |

|         |         |         |                                                                      |        |        |      |      |
|---------|---------|---------|----------------------------------------------------------------------|--------|--------|------|------|
| 6472261 | 7082741 | 1085557 | potassium voltage-gated channel, subfamily H (eag-related), member 4 | Kcnh4  | 114032 | 1,61 | up   |
| 6502260 | 7082741 | 1085556 | potassium voltage-gated channel, subfamily H (eag-related), member 4 | Kcnh4  | 114032 | 1,17 | down |
| 6511680 | 7082741 | 1085567 | potassium voltage-gated channel, subfamily H (eag-related), member 4 | Kcnh4  | 114032 | 1,69 | up   |
| 6567629 | 7082741 | 1085566 | potassium voltage-gated channel, subfamily H (eag-related), member 4 | Kcnh4  | 114032 | 1,02 | down |
| 6645294 | 7082741 | 1085559 | potassium voltage-gated channel, subfamily H (eag-related), member 4 | Kcnh4  | 114032 | 1,32 | up   |
| 6649164 | 7082741 | 1085563 | potassium voltage-gated channel, subfamily H (eag-related), member 4 | Kcnh4  | 114032 | 1,48 | down |
| 6672746 | 7082741 | 1085561 | potassium voltage-gated channel, subfamily H (eag-related), member 4 | Kcnh4  | 114032 | 2,13 | down |
| 5623033 | 7038687 | 982286  | potassium voltage-gated channel, subfamily Q, member 1               | Kcnq1  | 84020  | 1,02 | down |
| 5703257 | 7038687 | 982272  | potassium voltage-gated channel, subfamily Q, member 1               | Kcnq1  | 84020  | 1,12 | up   |
| 5766946 | 7038687 | 982283  | potassium voltage-gated channel, subfamily Q, member 1               | Kcnq1  | 84020  | 1,05 | down |
| 5804817 | 7038687 | 982281  | potassium voltage-gated channel, subfamily Q, member 1               | Kcnq1  | 84020  | 1,08 | down |
| 5932849 | 7038687 | 982285  | potassium voltage-gated channel, subfamily Q, member 1               | Kcnq1  | 84020  | 1,25 | down |
| 5937585 | 7038687 | 982282  | potassium voltage-gated channel, subfamily Q, member 1               | Kcnq1  | 84020  | 1,06 | down |
| 5972427 | 7038687 | 982276  | potassium voltage-gated channel, subfamily Q, member 1               | Kcnq1  | 84020  | 1,02 | down |
| 6002364 | 7038687 | 982287  | potassium voltage-gated channel, subfamily Q, member 1               | Kcnq1  | 84020  | 1,32 | up   |
| 6033147 | 7038687 | 982280  | potassium voltage-gated channel, subfamily Q, member 1               | Kcnq1  | 84020  | 1,08 | up   |
| 6096079 | 7038687 | 982274  | potassium voltage-gated channel, subfamily Q, member 1               | Kcnq1  | 84020  | 2,11 | up   |
| 6096339 | 7038687 | 982284  | potassium voltage-gated channel, subfamily Q, member 1               | Kcnq1  | 84020  | 1,15 | up   |
| 6103780 | 7038687 | 982275  | potassium voltage-gated channel, subfamily Q, member 1               | Kcnq1  | 84020  | 1,17 | down |
| 6126006 | 7038687 | 982281  | potassium voltage-gated channel, subfamily Q, member 1               | Kcnq1  | 84020  | 1,22 | up   |
| 6225121 | 7038687 | 982274  | potassium voltage-gated channel, subfamily Q, member 1               | Kcnq1  | 84020  | 1,36 | down |
| 6319593 | 7038687 | 982272  | potassium voltage-gated channel, subfamily Q, member 1               | Kcnq1  | 84020  | 1,00 | up   |
| 6384742 | 7038687 | 982277  | potassium voltage-gated channel, subfamily Q, member 1               | Kcnq1  | 84020  | 1,02 | down |
| 6502103 | 7038687 | 982278  | potassium voltage-gated channel, subfamily Q, member 1               | Kcnq1  | 84020  | 1,05 | up   |
| 6560574 | 7038687 | 982279  | potassium voltage-gated channel, subfamily Q, member 1               | Kcnq1  | 84020  | 1,12 | down |
| 6661089 | 7038687 | 982273  | potassium voltage-gated channel, subfamily Q, member 1               | Kcnq1  | 84020  | 1,04 | up   |
| 5627778 | 7328457 | 1691498 | potassium voltage-gated channel, subfamily Q, member 3               | Kcnq3  | 29682  | 1,65 | up   |
| 5648197 | 7328457 | 1691506 | potassium voltage-gated channel, subfamily Q, member 3               | Kcnq3  | 29682  | 1,28 | up   |
| 5740656 | 7328457 | 1691512 | potassium voltage-gated channel, subfamily Q, member 3               | Kcnq3  | 29682  | 1,36 | up   |
| 5873064 | 7328457 | 1691510 | potassium voltage-gated channel, subfamily Q, member 3               | Kcnq3  | 29682  | 2,20 | up   |
| 5984777 | 7328457 | 1691502 | potassium voltage-gated channel, subfamily Q, member 3               | Kcnq3  | 29682  | 1,07 | up   |
| 5993248 | 7328457 | 1691500 | potassium voltage-gated channel, subfamily Q, member 3               | Kcnq3  | 29682  | 1,06 | down |
| 6032274 | 7328457 | 1691498 | potassium voltage-gated channel, subfamily Q, member 3               | Kcnq3  | 29682  | 1,70 | down |
| 6084896 | 7328457 | 1691511 | potassium voltage-gated channel, subfamily Q, member 3               | Kcnq3  | 29682  | 1,33 | up   |
| 6117878 | 7328457 | 1691515 | potassium voltage-gated channel, subfamily Q, member 3               | Kcnq3  | 29682  | 1,21 | down |
| 6139555 | 7328457 | 1691512 | potassium voltage-gated channel, subfamily Q, member 3               | Kcnq3  | 29682  | 1,28 | down |
| 6156527 | 7328457 | 1691505 | potassium voltage-gated channel, subfamily Q, member 3               | Kcnq3  | 29682  | 1,89 | down |
| 6209328 | 7328457 | 1691504 | potassium voltage-gated channel, subfamily Q, member 3               | Kcnq3  | 29682  | 1,31 | down |
| 6211257 | 7328457 | 1691498 | potassium voltage-gated channel, subfamily Q, member 3               | Kcnq3  | 29682  | 1,75 | up   |
| 6270314 | 7328457 | 1691513 | potassium voltage-gated channel, subfamily Q, member 3               | Kcnq3  | 29682  | 1,53 | down |
| 6330445 | 7328457 | 1691499 | potassium voltage-gated channel, subfamily Q, member 3               | Kcnq3  | 29682  | 1,51 | down |
| 6399908 | 7328457 | 1691507 | potassium voltage-gated channel, subfamily Q, member 3               | Kcnq3  | 29682  | 1,04 | up   |
| 6442434 | 7328457 | 1691509 | potassium voltage-gated channel, subfamily Q, member 3               | Kcnq3  | 29682  | 1,28 | up   |
| 6506360 | 7328457 | 1691508 | potassium voltage-gated channel, subfamily Q, member 3               | Kcnq3  | 29682  | 1,50 | up   |
| 6506692 | 7328457 | 1691514 | potassium voltage-gated channel, subfamily Q, member 3               | Kcnq3  | 29682  | 1,60 | down |
| 6569339 | 7328457 | 1691501 | potassium voltage-gated channel, subfamily Q, member 3               | Kcnq3  | 29682  | 1,11 | up   |
| 6683433 | 7328457 | 1691503 | potassium voltage-gated channel, subfamily Q, member 3               | Kcnq3  | 29682  | 1,76 | up   |
| 5834689 | 7360325 | 1770520 | potassium voltage-gated channel, subfamily Q, member 5-like          | Kcnq5l | 259273 | 1,01 | down |
| 6490227 | 7360325 | 1770519 | potassium voltage-gated channel, subfamily Q, member 5-like          | Kcnq5l | 259273 | 2,61 | up   |
| 5638769 | 7344630 | 1731937 | POU class 2 homeobox 3                                               | Pou2f3 | 116544 | 1,09 | up   |
| 5654494 | 7344630 | 1731948 | POU class 2 homeobox 3                                               | Pou2f3 | 116544 | 1,47 | up   |
| 5747986 | 7344630 | 1731946 | POU class 2 homeobox 3                                               | Pou2f3 | 116544 | 1,03 | up   |
| 5817852 | 7344630 | 1731959 | POU class 2 homeobox 3                                               | Pou2f3 | 116544 | 1,17 | up   |
| 5907980 | 7344630 | 1731959 | POU class 2 homeobox 3                                               | Pou2f3 | 116544 | 1,33 | down |
| 5949752 | 7344630 | 1731939 | POU class 2 homeobox 3                                               | Pou2f3 | 116544 | 1,33 | up   |
| 5962780 | 7344630 | 1731949 | POU class 2 homeobox 3                                               | Pou2f3 | 116544 | 1,43 | down |

|         |         |         |                                         |        |        |      |      |
|---------|---------|---------|-----------------------------------------|--------|--------|------|------|
| 5977773 | 7344630 | 1731937 | POU class 2 homeobox 3                  | Pou2f3 | 116544 | 1,18 | up   |
| 6112017 | 7344630 | 1731957 | POU class 2 homeobox 3                  | Pou2f3 | 116544 | 1,35 | up   |
| 6173192 | 7344630 | 1731937 | POU class 2 homeobox 3                  | Pou2f3 | 116544 | 1,60 | down |
| 6202841 | 7344630 | 1731955 | POU class 2 homeobox 3                  | Pou2f3 | 116544 | 1,09 | up   |
| 6222752 | 7344630 | 1731950 | POU class 2 homeobox 3                  | Pou2f3 | 116544 | 1,02 | up   |
| 6283619 | 7344630 | 1731940 | POU class 2 homeobox 3                  | Pou2f3 | 116544 | 1,13 | down |
| 6286402 | 7344630 | 1731937 | POU class 2 homeobox 3                  | Pou2f3 | 116544 | 3,07 | down |
| 6334946 | 7344630 | 1731937 | POU class 2 homeobox 3                  | Pou2f3 | 116544 | 1,07 | down |
| 6488101 | 7344630 | 1731943 | POU class 2 homeobox 3                  | Pou2f3 | 116544 | 1,03 | down |
| 6521125 | 7344630 | 1731945 | POU class 2 homeobox 3                  | Pou2f3 | 116544 | 1,05 | down |
| 6566502 | 7344630 | 1731937 | POU class 2 homeobox 3                  | Pou2f3 | 116544 | 1,16 | down |
| 6618961 | 7344630 | 1731948 | POU class 2 homeobox 3                  | Pou2f3 | 116544 | 1,02 | up   |
| 6703066 | 7344630 | 1731947 | POU class 2 homeobox 3                  | Pou2f3 | 116544 | 1,13 | up   |
| 6303489 | 7141421 | 1229478 | POU class 4 homeobox 1                  | Pou4f1 | 114503 | 1,01 | down |
| 5983690 | 7331829 | 1700175 | POU class 6 homeobox 1                  | Pou6f1 | 116545 | 1,15 | up   |
| 5991347 | 7331829 | 1700176 | POU class 6 homeobox 1                  | Pou6f1 | 116545 | 1,07 | up   |
| 6020389 | 7331829 | 1700177 | POU class 6 homeobox 1                  | Pou6f1 | 116545 | 1,57 | up   |
| 6324791 | 7331829 | 1700173 | POU class 6 homeobox 1                  | Pou6f1 | 116545 | 1,17 | down |
| 6414202 | 7331829 | 1700177 | POU class 6 homeobox 1                  | Pou6f1 | 116545 | 1,37 | up   |
| 6581165 | 7331829 | 1700172 | POU class 6 homeobox 1                  | Pou6f1 | 116545 | 1,21 | up   |
| 6624710 | 7331829 | 1700172 | POU class 6 homeobox 1                  | Pou6f1 | 116545 | 1,02 | up   |
| 6652406 | 7331829 | 1700174 | POU class 6 homeobox 1                  | Pou6f1 | 116545 | 1,15 | up   |
| 6723617 | 7331829 | 1700176 | POU class 6 homeobox 1                  | Pou6f1 | 116545 | 1,43 | down |
| 5700457 | 7304938 | 1634831 | PQ loop repeat containing 3             | Pqlc3  | 298906 | 1,13 | up   |
| 5726421 | 7304938 | 1634830 | PQ loop repeat containing 3             | Pqlc3  | 298906 | 1,06 | down |
| 5745814 | 7304938 | 1634834 | PQ loop repeat containing 3             | Pqlc3  | 298906 | 1,57 | down |
| 5931376 | 7304938 | 1634831 | PQ loop repeat containing 3             | Pqlc3  | 298906 | 1,11 | down |
| 6042013 | 7304938 | 1634832 | PQ loop repeat containing 3             | Pqlc3  | 298906 | 1,31 | down |
| 6101856 | 7304938 | 1634832 | PQ loop repeat containing 3             | Pqlc3  | 298906 | 1,16 | down |
| 6173774 | 7304938 | 1634835 | PQ loop repeat containing 3             | Pqlc3  | 298906 | 2,12 | up   |
| 6213048 | 7304938 | 1634831 | PQ loop repeat containing 3             | Pqlc3  | 298906 | 1,31 | up   |
| 6234298 | 7304938 | 1634835 | PQ loop repeat containing 3             | Pqlc3  | 298906 | 1,24 | down |
| 6279735 | 7304938 | 1634836 | PQ loop repeat containing 3             | Pqlc3  | 298906 | 1,01 | down |
| 6344250 | 7304938 | 1634829 | PQ loop repeat containing 3             | Pqlc3  | 298906 | 1,63 | up   |
| 6525005 | 7304938 | 1634831 | PQ loop repeat containing 3             | Pqlc3  | 298906 | 1,07 | down |
| 6612234 | 7304938 | 1634833 | PQ loop repeat containing 3             | Pqlc3  | 298906 | 1,70 | up   |
| 5635314 | 7224182 | 1432766 | PR domain containing 1, with ZNF domain | Prdm1  | 309871 | 1,49 | down |
| 5647043 | 7224182 | 1432754 | PR domain containing 1, with ZNF domain | Prdm1  | 309871 | 1,41 | up   |
| 5824121 | 7224182 | 1432760 | PR domain containing 1, with ZNF domain | Prdm1  | 309871 | 1,82 | up   |
| 5865545 | 7224182 | 1432766 | PR domain containing 1, with ZNF domain | Prdm1  | 309871 | 1,64 | up   |
| 5961719 | 7224182 | 1432757 | PR domain containing 1, with ZNF domain | Prdm1  | 309871 | 1,15 | up   |
| 5981825 | 7224182 | 1432762 | PR domain containing 1, with ZNF domain | Prdm1  | 309871 | 1,24 | up   |
| 6080498 | 7224182 | 1432755 | PR domain containing 1, with ZNF domain | Prdm1  | 309871 | 1,12 | up   |
| 6528000 | 7224182 | 1432755 | PR domain containing 1, with ZNF domain | Prdm1  | 309871 | 1,25 | up   |
| 6631091 | 7224182 | 1432756 | PR domain containing 1, with ZNF domain | Prdm1  | 309871 | 1,30 | up   |
| 6635123 | 7224182 | 1432758 | PR domain containing 1, with ZNF domain | Prdm1  | 309871 | 2,18 | up   |
| 5784698 | 7334347 | 1705771 | PR domain containing 10                 | Prdm10 | 500964 | 1,37 | up   |
| 5860794 | 7334347 | 1705772 | PR domain containing 10                 | Prdm10 | 500964 | 1,23 | down |
| 5912591 | 7334347 | 1705764 | PR domain containing 10                 | Prdm10 | 500964 | 1,49 | up   |
| 6024910 | 7334347 | 1705761 | PR domain containing 10                 | Prdm10 | 500964 | 1,22 | down |
| 6046468 | 7334347 | 1705772 | PR domain containing 10                 | Prdm10 | 500964 | 1,11 | down |
| 6059568 | 7334347 | 1705773 | PR domain containing 10                 | Prdm10 | 500964 | 1,65 | up   |
| 6070844 | 7334347 | 1705774 | PR domain containing 10                 | Prdm10 | 500964 | 1,30 | up   |
| 6083033 | 7334347 | 1705757 | PR domain containing 10                 | Prdm10 | 500964 | 1,13 | up   |
| 6103271 | 7334347 | 1705760 | PR domain containing 10                 | Prdm10 | 500964 | 1,13 | down |
| 6126350 | 7334347 | 1705769 | PR domain containing 10                 | Prdm10 | 500964 | 1,05 | down |

|         |         |         |                                       |         |        |      |      |
|---------|---------|---------|---------------------------------------|---------|--------|------|------|
| 6133869 | 7334347 | 1705762 | PR domain containing 10               | Prdm10  | 500964 | 1,10 | up   |
| 6232773 | 7334347 | 1705770 | PR domain containing 10               | Prdm10  | 500964 | 1,04 | up   |
| 6288287 | 7334347 | 1705758 | PR domain containing 10               | Prdm10  | 500964 | 1,30 | down |
| 6299834 | 7334347 | 1705766 | PR domain containing 10               | Prdm10  | 500964 | 1,88 | up   |
| 6350935 | 7334347 | 1705751 | PR domain containing 10               | Prdm10  | 500964 | 1,07 | up   |
| 6516972 | 7334347 | 1705771 | PR domain containing 10               | Prdm10  | 500964 | 1,01 | up   |
| 6563126 | 7334347 | 1705768 | PR domain containing 10               | Prdm10  | 500964 | 1,16 | down |
| 6634710 | 7334347 | 1705765 | PR domain containing 10               | Prdm10  | 500964 | 1,28 | up   |
| 6664751 | 7334347 | 1705763 | PR domain containing 10               | Prdm10  | 500964 | 1,02 | up   |
| 5901032 | 7284359 | 1583439 | PR domain containing 13               | Prdm13  | 689695 | 1,07 | up   |
| 5631321 | 7123357 | 1185595 | PR domain containing 8                | Prdm8   | 305198 | 1,39 | down |
| 5660947 | 7123357 | 1185595 | PR domain containing 8                | Prdm8   | 305198 | 1,03 | up   |
| 5798390 | 7123357 | 1185599 | PR domain containing 8                | Prdm8   | 305198 | 1,08 | down |
| 6063092 | 7123357 | 1185597 | PR domain containing 8                | Prdm8   | 305198 | 1,10 | up   |
| 6093123 | 7123357 | 1185595 | PR domain containing 8                | Prdm8   | 305198 | 1,05 | up   |
| 6148877 | 7123357 | 1185595 | PR domain containing 8                | Prdm8   | 305198 | 1,28 | up   |
| 6306011 | 7123357 | 1185596 | PR domain containing 8                | Prdm8   | 305198 | 1,39 | down |
| 6381485 | 7123357 | 1185595 | PR domain containing 8                | Prdm8   | 305198 | 1,08 | down |
| 6439607 | 7123357 | 1185593 | PR domain containing 8                | Prdm8   | 305198 | 1,32 | down |
| 6484926 | 7123357 | 1185595 | PR domain containing 8                | Prdm8   | 305198 | 1,03 | up   |
| 6530002 | 7123357 | 1185594 | PR domain containing 8                | Prdm8   | 305198 | 1,37 | up   |
| 6716270 | 7123357 | 1185595 | PR domain containing 8                | Prdm8   | 305198 | 1,49 | up   |
| 6736887 | 7123357 | 1185595 | PR domain containing 8                | Prdm8   | 305198 | 1,06 | up   |
| 5906729 | 7152038 | 1255385 | pragma of Rnd2                        | Pragmin | 306506 | 1,62 | down |
| 5954232 | 7152038 | 1255378 | pragma of Rnd2                        | Pragmin | 306506 | 1,17 | up   |
| 5962590 | 7152038 | 1255398 | pragma of Rnd2                        | Pragmin | 306506 | 1,29 | down |
| 6037977 | 7152038 | 1255398 | pragma of Rnd2                        | Pragmin | 306506 | 2,22 | up   |
| 6058114 | 7152038 | 1255378 | pragma of Rnd2                        | Pragmin | 306506 | 1,19 | down |
| 6168915 | 7152038 | 1255400 | pragma of Rnd2                        | Pragmin | 306506 | 1,05 | up   |
| 6255388 | 7152038 | 1255400 | pragma of Rnd2                        | Pragmin | 306506 | 1,32 | up   |
| 6394718 | 7152038 | 1255398 | pragma of Rnd2                        | Pragmin | 306506 | 1,12 | up   |
| 6436806 | 7152038 | 1255400 | pragma of Rnd2                        | Pragmin | 306506 | 1,24 | up   |
| 6468769 | 7152038 | 1255380 | pragma of Rnd2                        | Pragmin | 306506 | 1,08 | down |
| 5693948 | 7275927 | 1562402 | pregnancy-associated plasma protein A | Pappa   | 313262 | 1,38 | up   |
| 5729539 | 7275927 | 1562338 | pregnancy-associated plasma protein A | Pappa   | 313262 | 1,94 | up   |
| 5753790 | 7275927 | 1562359 | pregnancy-associated plasma protein A | Pappa   | 313262 | 1,03 | down |
| 5767339 | 7275927 | 1562409 | pregnancy-associated plasma protein A | Pappa   | 313262 | 1,37 | up   |
| 5779676 | 7275927 | 1562348 | pregnancy-associated plasma protein A | Pappa   | 313262 | 1,29 | up   |
| 5801182 | 7275927 | 1562389 | pregnancy-associated plasma protein A | Pappa   | 313262 | 1,06 | down |
| 5836632 | 7275927 | 1562384 | pregnancy-associated plasma protein A | Pappa   | 313262 | 1,46 | down |
| 5843974 | 7275927 | 1562406 | pregnancy-associated plasma protein A | Pappa   | 313262 | 1,45 | up   |
| 5898423 | 7275927 | 1562348 | pregnancy-associated plasma protein A | Pappa   | 313262 | 2,38 | up   |
| 5905847 | 7275927 | 1562394 | pregnancy-associated plasma protein A | Pappa   | 313262 | 1,16 | up   |
| 5970229 | 7275927 | 1562387 | pregnancy-associated plasma protein A | Pappa   | 313262 | 1,62 | up   |
| 6063693 | 7275927 | 1562372 | pregnancy-associated plasma protein A | Pappa   | 313262 | 1,10 | up   |
| 6072280 | 7275927 | 1562385 | pregnancy-associated plasma protein A | Pappa   | 313262 | 1,07 | down |
| 6201231 | 7275927 | 1562387 | pregnancy-associated plasma protein A | Pappa   | 313262 | 1,12 | down |
| 6202955 | 7275927 | 1562357 | pregnancy-associated plasma protein A | Pappa   | 313262 | 1,01 | down |
| 6209046 | 7275927 | 1562393 | pregnancy-associated plasma protein A | Pappa   | 313262 | 1,54 | down |
| 6222409 | 7275927 | 1562365 | pregnancy-associated plasma protein A | Pappa   | 313262 | 1,27 | down |
| 6254329 | 7275927 | 1562358 | pregnancy-associated plasma protein A | Pappa   | 313262 | 1,27 | down |
| 6307161 | 7275927 | 1562364 | pregnancy-associated plasma protein A | Pappa   | 313262 | 1,04 | down |
| 6367016 | 7275927 | 1562401 | pregnancy-associated plasma protein A | Pappa   | 313262 | 1,03 | down |
| 6469479 | 7275927 | 1562389 | pregnancy-associated plasma protein A | Pappa   | 313262 | 1,24 | down |
| 6496915 | 7275927 | 1562407 | pregnancy-associated plasma protein A | Pappa   | 313262 | 1,11 | down |
| 6538250 | 7275927 | 1562355 | pregnancy-associated plasma protein A | Pappa   | 313262 | 1,39 | up   |

|         |         |         |                                             |         |        |      |      |
|---------|---------|---------|---------------------------------------------|---------|--------|------|------|
| 6568710 | 7275927 | 1562388 | pregnancy-associated plasma protein A       | Pappa   | 313262 | 1,89 | down |
| 6692309 | 7275927 | 1562356 | pregnancy-associated plasma protein A       | Pappa   | 313262 | 2,38 | up   |
| 6698488 | 7275927 | 1562409 | pregnancy-associated plasma protein A       | Pappa   | 313262 | 1,27 | up   |
| 5630308 | 7097454 | 1120875 | Prkr interacting protein 1 (IL11 inducible) | Prkrip1 | 498171 | 1,85 | up   |
| 5724518 | 7097454 | 1120878 | Prkr interacting protein 1 (IL11 inducible) | Prkrip1 | 498171 | 1,17 | up   |
| 5734640 | 7097454 | 1120877 | Prkr interacting protein 1 (IL11 inducible) | Prkrip1 | 498171 | 2,28 | down |
| 5876446 | 7097454 | 1120873 | Prkr interacting protein 1 (IL11 inducible) | Prkrip1 | 498171 | 1,61 | down |
| 6452133 | 7097454 | 1120874 | Prkr interacting protein 1 (IL11 inducible) | Prkrip1 | 498171 | 1,30 | down |
| 6518015 | 7097454 | 1120879 | Prkr interacting protein 1 (IL11 inducible) | Prkrip1 | 498171 | 1,12 | down |
| 6546378 | 7097454 | 1120873 | Prkr interacting protein 1 (IL11 inducible) | Prkrip1 | 498171 | 1,04 | down |
| 5634751 | 7236254 | 1464079 | procollagen, type IX, alpha 3               | Col9a3  | 362285 | 1,03 | up   |
| 5750330 | 7236254 | 1464077 | procollagen, type IX, alpha 3               | Col9a3  | 362285 | 1,30 | up   |
| 5895504 | 7236254 | 1464076 | procollagen, type IX, alpha 3               | Col9a3  | 362285 | 1,08 | down |
| 6172709 | 7236254 | 1464079 | procollagen, type IX, alpha 3               | Col9a3  | 362285 | 1,48 | down |
| 6176230 | 7236254 | 1464076 | procollagen, type IX, alpha 3               | Col9a3  | 362285 | 1,16 | up   |
| 6448927 | 7236254 | 1464077 | procollagen, type IX, alpha 3               | Col9a3  | 362285 | 1,02 | up   |
| 6524902 | 7236254 | 1464082 | procollagen, type IX, alpha 3               | Col9a3  | 362285 | 1,10 | down |
| 6578811 | 7236254 | 1464080 | procollagen, type IX, alpha 3               | Col9a3  | 362285 | 1,22 | down |
| 6656358 | 7236254 | 1464078 | procollagen, type IX, alpha 3               | Col9a3  | 362285 | 1,10 | down |
| 5716629 | 7365183 | 1781939 | procollagen, type VI, alpha 3               | Col6a3  | 367313 | 1,04 | up   |
| 5738070 | 7365183 | 1781930 | procollagen, type VI, alpha 3               | Col6a3  | 367313 | 1,11 | up   |
| 5766354 | 7365183 | 1781927 | procollagen, type VI, alpha 3               | Col6a3  | 367313 | 1,15 | down |
| 5776038 | 7365183 | 1781941 | procollagen, type VI, alpha 3               | Col6a3  | 367313 | 1,32 | down |
| 5825017 | 7365183 | 1781936 | procollagen, type VI, alpha 3               | Col6a3  | 367313 | 1,44 | down |
| 5891174 | 7365183 | 1781934 | procollagen, type VI, alpha 3               | Col6a3  | 367313 | 1,34 | down |
| 5912960 | 7365183 | 1781922 | procollagen, type VI, alpha 3               | Col6a3  | 367313 | 1,00 | down |
| 5977249 | 7365183 | 1781931 | procollagen, type VI, alpha 3               | Col6a3  | 367313 | 1,41 | up   |
| 5996584 | 7365183 | 1781929 | procollagen, type VI, alpha 3               | Col6a3  | 367313 | 1,05 | up   |
| 6019851 | 7365183 | 1781938 | procollagen, type VI, alpha 3               | Col6a3  | 367313 | 1,61 | up   |
| 6023043 | 7365183 | 1781924 | procollagen, type VI, alpha 3               | Col6a3  | 367313 | 1,09 | down |
| 6048102 | 7365183 | 1781945 | procollagen, type VI, alpha 3               | Col6a3  | 367313 | 1,00 | up   |
| 6129551 | 7365183 | 1781922 | procollagen, type VI, alpha 3               | Col6a3  | 367313 | 1,16 | up   |
| 6148756 | 7365183 | 1781933 | procollagen, type VI, alpha 3               | Col6a3  | 367313 | 1,18 | down |
| 6233004 | 7365183 | 1781944 | procollagen, type VI, alpha 3               | Col6a3  | 367313 | 1,02 | up   |
| 6323407 | 7365183 | 1781944 | procollagen, type VI, alpha 3               | Col6a3  | 367313 | 1,04 | up   |
| 6323926 | 7365183 | 1781946 | procollagen, type VI, alpha 3               | Col6a3  | 367313 | 1,18 | down |
| 6334172 | 7365183 | 1781926 | procollagen, type VI, alpha 3               | Col6a3  | 367313 | 1,90 | down |
| 6343705 | 7365183 | 1781925 | procollagen, type VI, alpha 3               | Col6a3  | 367313 | 1,05 | down |
| 6362543 | 7365183 | 1781932 | procollagen, type VI, alpha 3               | Col6a3  | 367313 | 1,50 | up   |
| 6362720 | 7365183 | 1781937 | procollagen, type VI, alpha 3               | Col6a3  | 367313 | 1,03 | down |
| 6608834 | 7365183 | 1781925 | procollagen, type VI, alpha 3               | Col6a3  | 367313 | 1,38 | down |
| 6618950 | 7365183 | 1781923 | procollagen, type VI, alpha 3               | Col6a3  | 367313 | 1,23 | up   |
| 6643334 | 7365183 | 1781928 | procollagen, type VI, alpha 3               | Col6a3  | 367313 | 1,01 | up   |
| 6732985 | 7365183 | 1781940 | procollagen, type VI, alpha 3               | Col6a3  | 367313 | 1,01 | down |
| 5622503 | 7340506 | 1721347 | procollagen, type VII, alpha 1              | Col7a1  | 301012 | 1,10 | up   |
| 5645738 | 7340506 | 1721316 | procollagen, type VII, alpha 1              | Col7a1  | 301012 | 1,41 | down |
| 5658874 | 7340506 | 1721304 | procollagen, type VII, alpha 1              | Col7a1  | 301012 | 1,15 | down |
| 5674418 | 7340506 | 1721363 | procollagen, type VII, alpha 1              | Col7a1  | 301012 | 1,12 | up   |
| 5686626 | 7340506 | 1721331 | procollagen, type VII, alpha 1              | Col7a1  | 301012 | 1,07 | down |
| 5703984 | 7340506 | 1721361 | procollagen, type VII, alpha 1              | Col7a1  | 301012 | 1,02 | down |
| 5708101 | 7340506 | 1721365 | procollagen, type VII, alpha 1              | Col7a1  | 301012 | 1,35 | up   |
| 5709301 | 7340506 | 1721336 | procollagen, type VII, alpha 1              | Col7a1  | 301012 | 1,18 | down |
| 5711166 | 7340506 | 1721274 | procollagen, type VII, alpha 1              | Col7a1  | 301012 | 1,00 | down |
| 5722383 | 7340506 | 1721278 | procollagen, type VII, alpha 1              | Col7a1  | 301012 | 1,14 | down |
| 5730147 | 7340506 | 1721293 | procollagen, type VII, alpha 1              | Col7a1  | 301012 | 1,35 | down |
| 5731558 | 7340506 | 1721340 | procollagen, type VII, alpha 1              | Col7a1  | 301012 | 2,51 | up   |

|         |         |         |                                |        |        |      |      |
|---------|---------|---------|--------------------------------|--------|--------|------|------|
| 5734799 | 7340506 | 1721285 | procollagen, type VII, alpha 1 | Col7a1 | 301012 | 1,86 | down |
| 5738931 | 7340506 | 1721266 | procollagen, type VII, alpha 1 | Col7a1 | 301012 | 1,15 | up   |
| 5741049 | 7340506 | 1721255 | procollagen, type VII, alpha 1 | Col7a1 | 301012 | 1,47 | up   |
| 5743896 | 7340506 | 1721307 | procollagen, type VII, alpha 1 | Col7a1 | 301012 | 1,17 | up   |
| 5747105 | 7340506 | 1721324 | procollagen, type VII, alpha 1 | Col7a1 | 301012 | 1,66 | down |
| 5752971 | 7340506 | 1721288 | procollagen, type VII, alpha 1 | Col7a1 | 301012 | 1,01 | down |
| 5756117 | 7340506 | 1721286 | procollagen, type VII, alpha 1 | Col7a1 | 301012 | 1,34 | down |
| 5757541 | 7340506 | 1721296 | procollagen, type VII, alpha 1 | Col7a1 | 301012 | 1,36 | down |
| 5759667 | 7340506 | 1721280 | procollagen, type VII, alpha 1 | Col7a1 | 301012 | 1,11 | up   |
| 5761292 | 7340506 | 1721316 | procollagen, type VII, alpha 1 | Col7a1 | 301012 | 1,16 | up   |
| 5782297 | 7340506 | 1721298 | procollagen, type VII, alpha 1 | Col7a1 | 301012 | 1,04 | down |
| 5790214 | 7340506 | 1721346 | procollagen, type VII, alpha 1 | Col7a1 | 301012 | 1,29 | up   |
| 5791675 | 7340506 | 1721350 | procollagen, type VII, alpha 1 | Col7a1 | 301012 | 1,04 | up   |
| 5792306 | 7340506 | 1721290 | procollagen, type VII, alpha 1 | Col7a1 | 301012 | 1,07 | down |
| 5793884 | 7340506 | 1721257 | procollagen, type VII, alpha 1 | Col7a1 | 301012 | 1,59 | down |
| 5831339 | 7340506 | 1721320 | procollagen, type VII, alpha 1 | Col7a1 | 301012 | 1,09 | up   |
| 5833947 | 7340506 | 1721282 | procollagen, type VII, alpha 1 | Col7a1 | 301012 | 1,36 | up   |
| 5836744 | 7340506 | 1721289 | procollagen, type VII, alpha 1 | Col7a1 | 301012 | 1,30 | down |
| 5854673 | 7340506 | 1721323 | procollagen, type VII, alpha 1 | Col7a1 | 301012 | 1,41 | up   |
| 5873600 | 7340506 | 1721303 | procollagen, type VII, alpha 1 | Col7a1 | 301012 | 1,35 | down |
| 5881827 | 7340506 | 1721339 | procollagen, type VII, alpha 1 | Col7a1 | 301012 | 1,05 | down |
| 5884835 | 7340506 | 1721300 | procollagen, type VII, alpha 1 | Col7a1 | 301012 | 1,15 | up   |
| 5903363 | 7340506 | 1721333 | procollagen, type VII, alpha 1 | Col7a1 | 301012 | 1,12 | up   |
| 5909738 | 7340506 | 1721352 | procollagen, type VII, alpha 1 | Col7a1 | 301012 | 1,25 | down |
| 5910135 | 7340506 | 1721343 | procollagen, type VII, alpha 1 | Col7a1 | 301012 | 1,29 | down |
| 5925691 | 7340506 | 1721271 | procollagen, type VII, alpha 1 | Col7a1 | 301012 | 1,11 | down |
| 5927701 | 7340506 | 1721277 | procollagen, type VII, alpha 1 | Col7a1 | 301012 | 1,16 | up   |
| 5935120 | 7340506 | 1721313 | procollagen, type VII, alpha 1 | Col7a1 | 301012 | 1,30 | up   |
| 5958362 | 7340506 | 1721308 | procollagen, type VII, alpha 1 | Col7a1 | 301012 | 1,05 | down |
| 5959798 | 7340506 | 1721302 | procollagen, type VII, alpha 1 | Col7a1 | 301012 | 1,23 | down |
| 5962949 | 7340506 | 1721315 | procollagen, type VII, alpha 1 | Col7a1 | 301012 | 1,01 | up   |
| 5964019 | 7340506 | 1721351 | procollagen, type VII, alpha 1 | Col7a1 | 301012 | 1,74 | up   |
| 5982176 | 7340506 | 1721321 | procollagen, type VII, alpha 1 | Col7a1 | 301012 | 1,07 | down |
| 5992414 | 7340506 | 1721334 | procollagen, type VII, alpha 1 | Col7a1 | 301012 | 1,02 | down |
| 5996601 | 7340506 | 1721364 | procollagen, type VII, alpha 1 | Col7a1 | 301012 | 1,47 | up   |
| 5997515 | 7340506 | 1721314 | procollagen, type VII, alpha 1 | Col7a1 | 301012 | 1,14 | up   |
| 6002995 | 7340506 | 1721310 | procollagen, type VII, alpha 1 | Col7a1 | 301012 | 1,60 | down |
| 6008032 | 7340506 | 1721267 | procollagen, type VII, alpha 1 | Col7a1 | 301012 | 1,01 | up   |
| 6012643 | 7340506 | 1721356 | procollagen, type VII, alpha 1 | Col7a1 | 301012 | 1,06 | up   |
| 6021148 | 7340506 | 1721276 | procollagen, type VII, alpha 1 | Col7a1 | 301012 | 1,08 | up   |
| 6050693 | 7340506 | 1721363 | procollagen, type VII, alpha 1 | Col7a1 | 301012 | 1,32 | down |
| 6067092 | 7340506 | 1721329 | procollagen, type VII, alpha 1 | Col7a1 | 301012 | 1,78 | up   |
| 6091504 | 7340506 | 1721295 | procollagen, type VII, alpha 1 | Col7a1 | 301012 | 1,08 | up   |
| 6091553 | 7340506 | 1721297 | procollagen, type VII, alpha 1 | Col7a1 | 301012 | 1,02 | up   |
| 6104009 | 7340506 | 1721268 | procollagen, type VII, alpha 1 | Col7a1 | 301012 | 1,16 | down |
| 6109596 | 7340506 | 1721258 | procollagen, type VII, alpha 1 | Col7a1 | 301012 | 1,24 | up   |
| 6110467 | 7340506 | 1721322 | procollagen, type VII, alpha 1 | Col7a1 | 301012 | 1,07 | down |
| 6114483 | 7340506 | 1721311 | procollagen, type VII, alpha 1 | Col7a1 | 301012 | 1,01 | down |
| 6115480 | 7340506 | 1721355 | procollagen, type VII, alpha 1 | Col7a1 | 301012 | 1,59 | down |
| 6127235 | 7340506 | 1721279 | procollagen, type VII, alpha 1 | Col7a1 | 301012 | 1,39 | up   |
| 6151248 | 7340506 | 1721335 | procollagen, type VII, alpha 1 | Col7a1 | 301012 | 1,50 | up   |
| 6167376 | 7340506 | 1721273 | procollagen, type VII, alpha 1 | Col7a1 | 301012 | 1,11 | down |
| 6186197 | 7340506 | 1721261 | procollagen, type VII, alpha 1 | Col7a1 | 301012 | 1,78 | up   |
| 6187783 | 7340506 | 1721344 | procollagen, type VII, alpha 1 | Col7a1 | 301012 | 1,09 | down |
| 6188367 | 7340506 | 1721275 | procollagen, type VII, alpha 1 | Col7a1 | 301012 | 1,33 | down |
| 6219144 | 7340506 | 1721318 | procollagen, type VII, alpha 1 | Col7a1 | 301012 | 1,02 | down |

|         |         |         |                                                                                    |        |        |      |      |
|---------|---------|---------|------------------------------------------------------------------------------------|--------|--------|------|------|
| 6224334 | 7340506 | 1721348 | procollagen, type VII, alpha 1                                                     | Col7a1 | 301012 | 1,75 | up   |
| 6228539 | 7340506 | 1721328 | procollagen, type VII, alpha 1                                                     | Col7a1 | 301012 | 1,19 | down |
| 6228604 | 7340506 | 1721281 | procollagen, type VII, alpha 1                                                     | Col7a1 | 301012 | 1,07 | down |
| 6235286 | 7340506 | 1721362 | procollagen, type VII, alpha 1                                                     | Col7a1 | 301012 | 2,11 | up   |
| 6247739 | 7340506 | 1721325 | procollagen, type VII, alpha 1                                                     | Col7a1 | 301012 | 1,25 | down |
| 6250676 | 7340506 | 1721336 | procollagen, type VII, alpha 1                                                     | Col7a1 | 301012 | 1,45 | down |
| 6259904 | 7340506 | 1721360 | procollagen, type VII, alpha 1                                                     | Col7a1 | 301012 | 1,99 | up   |
| 6269954 | 7340506 | 1721260 | procollagen, type VII, alpha 1                                                     | Col7a1 | 301012 | 1,46 | up   |
| 6275785 | 7340506 | 1721305 | procollagen, type VII, alpha 1                                                     | Col7a1 | 301012 | 1,27 | down |
| 6283956 | 7340506 | 1721317 | procollagen, type VII, alpha 1                                                     | Col7a1 | 301012 | 1,43 | down |
| 6284418 | 7340506 | 1721259 | procollagen, type VII, alpha 1                                                     | Col7a1 | 301012 | 2,10 | up   |
| 6298777 | 7340506 | 1721312 | procollagen, type VII, alpha 1                                                     | Col7a1 | 301012 | 1,70 | down |
| 6301162 | 7340506 | 1721272 | procollagen, type VII, alpha 1                                                     | Col7a1 | 301012 | 1,17 | down |
| 6313985 | 7340506 | 1721270 | procollagen, type VII, alpha 1                                                     | Col7a1 | 301012 | 1,03 | down |
| 6317946 | 7340506 | 1721278 | procollagen, type VII, alpha 1                                                     | Col7a1 | 301012 | 1,16 | down |
| 6318580 | 7340506 | 1721337 | procollagen, type VII, alpha 1                                                     | Col7a1 | 301012 | 1,19 | down |
| 6329601 | 7340506 | 1721319 | procollagen, type VII, alpha 1                                                     | Col7a1 | 301012 | 1,34 | down |
| 6346123 | 7340506 | 1721359 | procollagen, type VII, alpha 1                                                     | Col7a1 | 301012 | 1,39 | up   |
| 6356041 | 7340506 | 1721276 | procollagen, type VII, alpha 1                                                     | Col7a1 | 301012 | 1,28 | up   |
| 6371023 | 7340506 | 1721264 | procollagen, type VII, alpha 1                                                     | Col7a1 | 301012 | 1,58 | up   |
| 6378803 | 7340506 | 1721265 | procollagen, type VII, alpha 1                                                     | Col7a1 | 301012 | 1,70 | down |
| 6382342 | 7340506 | 1721291 | procollagen, type VII, alpha 1                                                     | Col7a1 | 301012 | 1,03 | down |
| 6385329 | 7340506 | 1721263 | procollagen, type VII, alpha 1                                                     | Col7a1 | 301012 | 1,05 | up   |
| 6391232 | 7340506 | 1721301 | procollagen, type VII, alpha 1                                                     | Col7a1 | 301012 | 1,17 | down |
| 6391891 | 7340506 | 1721327 | procollagen, type VII, alpha 1                                                     | Col7a1 | 301012 | 1,03 | up   |
| 6403951 | 7340506 | 1721256 | procollagen, type VII, alpha 1                                                     | Col7a1 | 301012 | 1,12 | down |
| 6411702 | 7340506 | 1721342 | procollagen, type VII, alpha 1                                                     | Col7a1 | 301012 | 2,08 | down |
| 6421568 | 7340506 | 1721329 | procollagen, type VII, alpha 1                                                     | Col7a1 | 301012 | 2,64 | up   |
| 6460397 | 7340506 | 1721331 | procollagen, type VII, alpha 1                                                     | Col7a1 | 301012 | 1,68 | down |
| 6491706 | 7340506 | 1721326 | procollagen, type VII, alpha 1                                                     | Col7a1 | 301012 | 1,01 | down |
| 6504649 | 7340506 | 1721330 | procollagen, type VII, alpha 1                                                     | Col7a1 | 301012 | 1,03 | up   |
| 6508366 | 7340506 | 1721309 | procollagen, type VII, alpha 1                                                     | Col7a1 | 301012 | 1,92 | down |
| 6523273 | 7340506 | 1721306 | procollagen, type VII, alpha 1                                                     | Col7a1 | 301012 | 1,25 | down |
| 6526650 | 7340506 | 1721284 | procollagen, type VII, alpha 1                                                     | Col7a1 | 301012 | 1,07 | up   |
| 6555540 | 7340506 | 1721269 | procollagen, type VII, alpha 1                                                     | Col7a1 | 301012 | 1,38 | down |
| 6558919 | 7340506 | 1721287 | procollagen, type VII, alpha 1                                                     | Col7a1 | 301012 | 1,21 | down |
| 6575814 | 7340506 | 1721354 | procollagen, type VII, alpha 1                                                     | Col7a1 | 301012 | 1,00 | up   |
| 6592369 | 7340506 | 1721262 | procollagen, type VII, alpha 1                                                     | Col7a1 | 301012 | 1,11 | down |
| 6593055 | 7340506 | 1721292 | procollagen, type VII, alpha 1                                                     | Col7a1 | 301012 | 1,14 | down |
| 6656230 | 7340506 | 1721294 | procollagen, type VII, alpha 1                                                     | Col7a1 | 301012 | 1,03 | up   |
| 6670943 | 7340506 | 1721358 | procollagen, type VII, alpha 1                                                     | Col7a1 | 301012 | 1,06 | up   |
| 6677460 | 7340506 | 1721299 | procollagen, type VII, alpha 1                                                     | Col7a1 | 301012 | 1,45 | up   |
| 6697422 | 7340506 | 1721345 | procollagen, type VII, alpha 1                                                     | Col7a1 | 301012 | 1,12 | down |
| 6710078 | 7340506 | 1721357 | procollagen, type VII, alpha 1                                                     | Col7a1 | 301012 | 1,12 | up   |
| 6713298 | 7340506 | 1721332 | procollagen, type VII, alpha 1                                                     | Col7a1 | 301012 | 1,48 | down |
| 6719254 | 7340506 | 1721349 | procollagen, type VII, alpha 1                                                     | Col7a1 | 301012 | 1,12 | up   |
| 6730021 | 7340506 | 1721341 | procollagen, type VII, alpha 1                                                     | Col7a1 | 301012 | 1,30 | up   |
| 6737117 | 7340506 | 1721283 | procollagen, type VII, alpha 1                                                     | Col7a1 | 301012 | 1,02 | up   |
| 5726899 | 7067614 | 1050202 | procollagen-proline, 2-oxoglutarate 4-dioxygenase (proline 4-hydroxylase), alpha 1 | P4ha2  | 360526 | 1,30 | down |
| 5845762 | 7067614 | 1050185 | procollagen-proline, 2-oxoglutarate 4-dioxygenase (proline 4-hydroxylase), alpha 1 | P4ha2  | 360526 | 1,02 | up   |
| 5871619 | 7067614 | 1050193 | procollagen-proline, 2-oxoglutarate 4-dioxygenase (proline 4-hydroxylase), alpha 1 | P4ha2  | 360526 | 1,08 | down |
| 5917176 | 7067614 | 1050202 | procollagen-proline, 2-oxoglutarate 4-dioxygenase (proline 4-hydroxylase), alpha 1 | P4ha2  | 360526 | 1,63 | down |
| 5921026 | 7067614 | 1050188 | procollagen-proline, 2-oxoglutarate 4-dioxygenase (proline 4-hydroxylase), alpha 1 | P4ha2  | 360526 | 1,18 | down |
| 5944986 | 7067614 | 1050184 | procollagen-proline, 2-oxoglutarate 4-dioxygenase (proline 4-hydroxylase), alpha 1 | P4ha2  | 360526 | 2,24 | up   |
| 5952066 | 7067614 | 1050195 | procollagen-proline, 2-oxoglutarate 4-dioxygenase (proline 4-hydroxylase), alpha 1 | P4ha2  | 360526 | 1,11 | down |
| 6080178 | 7067614 | 1050202 | procollagen-proline, 2-oxoglutarate 4-dioxygenase (proline 4-hydroxylase), alpha 1 | P4ha2  | 360526 | 1,51 | down |



|         |         |         |                                                                                    |        |        |      |      |
|---------|---------|---------|------------------------------------------------------------------------------------|--------|--------|------|------|
| 6182149 | 7067614 | 1050183 | procollagen-proline, 2-oxoglutarate 4-dioxygenase (proline 4-hydroxylase), alpha 1 | P4ha2  | 360526 | 1,58 | up   |
| 6280653 | 7067614 | 1050199 | procollagen-proline, 2-oxoglutarate 4-dioxygenase (proline 4-hydroxylase), alpha 1 | P4ha2  | 360526 | 1,37 | down |
| 6357873 | 7067614 | 1050180 | procollagen-proline, 2-oxoglutarate 4-dioxygenase (proline 4-hydroxylase), alpha 1 | P4ha2  | 360526 | 1,16 | up   |
| 6363952 | 7067614 | 1050201 | procollagen-proline, 2-oxoglutarate 4-dioxygenase (proline 4-hydroxylase), alpha 1 | P4ha2  | 360526 | 1,24 | down |
| 6409520 | 7067614 | 1050182 | procollagen-proline, 2-oxoglutarate 4-dioxygenase (proline 4-hydroxylase), alpha 1 | P4ha2  | 360526 | 1,07 | up   |
| 6417702 | 7067614 | 1050196 | procollagen-proline, 2-oxoglutarate 4-dioxygenase (proline 4-hydroxylase), alpha 1 | P4ha2  | 360526 | 1,16 | up   |
| 6455739 | 7067614 | 1050202 | procollagen-proline, 2-oxoglutarate 4-dioxygenase (proline 4-hydroxylase), alpha 1 | P4ha2  | 360526 | 1,33 | down |
| 6504071 | 7067614 | 1050194 | procollagen-proline, 2-oxoglutarate 4-dioxygenase (proline 4-hydroxylase), alpha 1 | P4ha2  | 360526 | 1,21 | up   |
| 6618149 | 7067614 | 1050178 | procollagen-proline, 2-oxoglutarate 4-dioxygenase (proline 4-hydroxylase), alpha 1 | P4ha2  | 360526 | 1,30 | down |
| 6636219 | 7067614 | 1050200 | procollagen-proline, 2-oxoglutarate 4-dioxygenase (proline 4-hydroxylase), alpha 1 | P4ha2  | 360526 | 1,21 | up   |
| 6658268 | 7067614 | 1050189 | procollagen-proline, 2-oxoglutarate 4-dioxygenase (proline 4-hydroxylase), alpha 1 | P4ha2  | 360526 | 1,08 | up   |
| 6693728 | 7067614 | 1050202 | procollagen-proline, 2-oxoglutarate 4-dioxygenase (proline 4-hydroxylase), alpha 1 | P4ha2  | 360526 | 1,20 | down |
| 6715216 | 7067614 | 1050190 | procollagen-proline, 2-oxoglutarate 4-dioxygenase (proline 4-hydroxylase), alpha 1 | P4ha2  | 360526 | 1,20 | down |
| 5642038 | 7030518 | 961675  | proline dehydrogenase (oxidase) 2                                                  | Prodh2 | 361538 | 1,37 | down |
| 5758122 | 7030518 | 961680  | proline dehydrogenase (oxidase) 2                                                  | Prodh2 | 361538 | 1,08 | up   |
| 5833206 | 7030518 | 961673  | proline dehydrogenase (oxidase) 2                                                  | Prodh2 | 361538 | 1,02 | down |
| 5940767 | 7030518 | 961686  | proline dehydrogenase (oxidase) 2                                                  | Prodh2 | 361538 | 1,59 | up   |
| 5951814 | 7030518 | 961683  | proline dehydrogenase (oxidase) 2                                                  | Prodh2 | 361538 | 1,01 | down |
| 5994353 | 7030518 | 961675  | proline dehydrogenase (oxidase) 2                                                  | Prodh2 | 361538 | 1,10 | up   |
| 6030686 | 7030518 | 961676  | proline dehydrogenase (oxidase) 2                                                  | Prodh2 | 361538 | 1,01 | down |
| 6121159 | 7030518 | 961679  | proline dehydrogenase (oxidase) 2                                                  | Prodh2 | 361538 | 1,01 | up   |
| 6184892 | 7030518 | 961687  | proline dehydrogenase (oxidase) 2                                                  | Prodh2 | 361538 | 1,32 | down |
| 6285109 | 7030518 | 961685  | proline dehydrogenase (oxidase) 2                                                  | Prodh2 | 361538 | 1,23 | up   |
| 6404500 | 7030518 | 961678  | proline dehydrogenase (oxidase) 2                                                  | Prodh2 | 361538 | 1,15 | up   |
| 6473720 | 7030518 | 961674  | proline dehydrogenase (oxidase) 2                                                  | Prodh2 | 361538 | 1,04 | down |
| 6524514 | 7030518 | 961673  | proline dehydrogenase (oxidase) 2                                                  | Prodh2 | 361538 | 1,08 | down |
| 6599028 | 7030518 | 961686  | proline dehydrogenase (oxidase) 2                                                  | Prodh2 | 361538 | 1,12 | down |
| 5647570 | 7268457 | 1543638 | proline-rich transmembrane protein 3                                               | Prrt3  | 502873 | 1,11 | down |
| 5726443 | 7268457 | 1543639 | proline-rich transmembrane protein 3                                               | Prrt3  | 502873 | 1,54 | up   |
| 5996571 | 7268457 | 1543639 | proline-rich transmembrane protein 3                                               | Prrt3  | 502873 | 1,18 | down |
| 6188451 | 7268457 | 1543639 | proline-rich transmembrane protein 3                                               | Prrt3  | 502873 | 1,10 | down |
| 6297889 | 7268457 | 1543638 | proline-rich transmembrane protein 3                                               | Prrt3  | 502873 | 1,10 | up   |
| 6307501 | 7268457 | 1543639 | proline-rich transmembrane protein 3                                               | Prrt3  | 502873 | 1,09 | down |
| 6567539 | 7268457 | 1543641 | proline-rich transmembrane protein 3                                               | Prrt3  | 502873 | 1,03 | up   |
| 5683734 | 7244569 | 1484677 | prominin 2                                                                         | Prom2  | 192211 | 1,36 | down |
| 5724146 | 7244569 | 1484682 | prominin 2                                                                         | Prom2  | 192211 | 1,03 | down |
| 5762112 | 7244569 | 1484671 | prominin 2                                                                         | Prom2  | 192211 | 1,21 | down |
| 5806836 | 7244569 | 1484675 | prominin 2                                                                         | Prom2  | 192211 | 1,02 | down |
| 5842112 | 7244569 | 1484684 | prominin 2                                                                         | Prom2  | 192211 | 1,05 | up   |
| 5854971 | 7244569 | 1484683 | prominin 2                                                                         | Prom2  | 192211 | 1,01 | up   |
| 5886539 | 7244569 | 1484688 | prominin 2                                                                         | Prom2  | 192211 | 1,81 | up   |
| 5917872 | 7244569 | 1484687 | prominin 2                                                                         | Prom2  | 192211 | 1,15 | down |
| 6005273 | 7244569 | 1484691 | prominin 2                                                                         | Prom2  | 192211 | 1,02 | down |
| 6085656 | 7244569 | 1484685 | prominin 2                                                                         | Prom2  | 192211 | 2,12 | down |
| 6106327 | 7244569 | 1484680 | prominin 2                                                                         | Prom2  | 192211 | 1,06 | up   |
| 6215669 | 7244569 | 1484686 | prominin 2                                                                         | Prom2  | 192211 | 1,26 | up   |
| 6217609 | 7244569 | 1484692 | prominin 2                                                                         | Prom2  | 192211 | 1,11 | up   |
| 6314367 | 7244569 | 1484690 | prominin 2                                                                         | Prom2  | 192211 | 1,56 | up   |
| 6398986 | 7244569 | 1484676 | prominin 2                                                                         | Prom2  | 192211 | 1,08 | up   |
| 6425591 | 7244569 | 1484672 | prominin 2                                                                         | Prom2  | 192211 | 1,34 | up   |
| 6449836 | 7244569 | 1484673 | prominin 2                                                                         | Prom2  | 192211 | 1,14 | down |
| 6458955 | 7244569 | 1484678 | prominin 2                                                                         | Prom2  | 192211 | 1,82 | up   |
| 6497044 | 7244569 | 1484692 | prominin 2                                                                         | Prom2  | 192211 | 1,27 | up   |
| 6528289 | 7244569 | 1484681 | prominin 2                                                                         | Prom2  | 192211 | 1,78 | down |
| 6581810 | 7244569 | 1484674 | prominin 2                                                                         | Prom2  | 192211 | 1,13 | up   |
| 6643682 | 7244569 | 1484694 | prominin 2                                                                         | Prom2  | 192211 | 1,10 | up   |

|         |         |         |                                               |       |        |      |      |
|---------|---------|---------|-----------------------------------------------|-------|--------|------|------|
| 6645507 | 7244569 | 1484690 | prominin 2                                    | Prom2 | 192211 | 2,08 | down |
| 6684354 | 7244569 | 1484693 | prominin 2                                    | Prom2 | 192211 | 1,08 | up   |
| 6712012 | 7244569 | 1484671 | prominin 2                                    | Prom2 | 192211 | 1,13 | up   |
| 6715669 | 7244569 | 1484689 | prominin 2                                    | Prom2 | 192211 | 1,03 | up   |
| 6733133 | 7244569 | 1484679 | prominin 2                                    | Prom2 | 192211 | 1,55 | down |
| 5728169 | 7032552 | 967041  | proprotein convertase subtilisin/kexin type 6 | Pcsk6 | 25507  | 1,21 | up   |
| 5743985 | 7032552 | 967038  | proprotein convertase subtilisin/kexin type 6 | Pcsk6 | 25507  | 1,49 | up   |
| 5775274 | 7032552 | 967051  | proprotein convertase subtilisin/kexin type 6 | Pcsk6 | 25507  | 1,47 | up   |
| 5804211 | 7032552 | 967052  | proprotein convertase subtilisin/kexin type 6 | Pcsk6 | 25507  | 2,02 | up   |
| 5819226 | 7032552 | 967042  | proprotein convertase subtilisin/kexin type 6 | Pcsk6 | 25507  | 1,07 | down |
| 5859517 | 7032552 | 967052  | proprotein convertase subtilisin/kexin type 6 | Pcsk6 | 25507  | 1,45 | up   |
| 5880903 | 7032552 | 967045  | proprotein convertase subtilisin/kexin type 6 | Pcsk6 | 25507  | 1,70 | down |
| 5932412 | 7032552 | 967040  | proprotein convertase subtilisin/kexin type 6 | Pcsk6 | 25507  | 1,33 | down |
| 5971025 | 7032552 | 967044  | proprotein convertase subtilisin/kexin type 6 | Pcsk6 | 25507  | 2,45 | down |
| 6018030 | 7032552 | 967047  | proprotein convertase subtilisin/kexin type 6 | Pcsk6 | 25507  | 1,67 | down |
| 6068111 | 7032552 | 967034  | proprotein convertase subtilisin/kexin type 6 | Pcsk6 | 25507  | 1,04 | down |
| 6131312 | 7032552 | 967049  | proprotein convertase subtilisin/kexin type 6 | Pcsk6 | 25507  | 2,06 | up   |
| 6168695 | 7032552 | 967052  | proprotein convertase subtilisin/kexin type 6 | Pcsk6 | 25507  | 1,31 | down |
| 6222218 | 7032552 | 967048  | proprotein convertase subtilisin/kexin type 6 | Pcsk6 | 25507  | 1,04 | up   |
| 6256151 | 7032552 | 967039  | proprotein convertase subtilisin/kexin type 6 | Pcsk6 | 25507  | 1,19 | down |
| 6264946 | 7032552 | 967052  | proprotein convertase subtilisin/kexin type 6 | Pcsk6 | 25507  | 1,24 | down |
| 6299607 | 7032552 | 967033  | proprotein convertase subtilisin/kexin type 6 | Pcsk6 | 25507  | 1,01 | down |
| 6324240 | 7032552 | 967052  | proprotein convertase subtilisin/kexin type 6 | Pcsk6 | 25507  | 2,25 | down |
| 6339038 | 7032552 | 967043  | proprotein convertase subtilisin/kexin type 6 | Pcsk6 | 25507  | 1,09 | down |
| 6352262 | 7032552 | 967050  | proprotein convertase subtilisin/kexin type 6 | Pcsk6 | 25507  | 1,18 | down |
| 6393346 | 7032552 | 967046  | proprotein convertase subtilisin/kexin type 6 | Pcsk6 | 25507  | 1,42 | down |
| 6439087 | 7032552 | 967052  | proprotein convertase subtilisin/kexin type 6 | Pcsk6 | 25507  | 1,44 | up   |
| 6483285 | 7032552 | 967039  | proprotein convertase subtilisin/kexin type 6 | Pcsk6 | 25507  | 2,03 | down |
| 6528407 | 7032552 | 967035  | proprotein convertase subtilisin/kexin type 6 | Pcsk6 | 25507  | 3,02 | up   |
| 6675533 | 7032552 | 967037  | proprotein convertase subtilisin/kexin type 6 | Pcsk6 | 25507  | 1,15 | down |
| 6726195 | 7032552 | 967036  | proprotein convertase subtilisin/kexin type 6 | Pcsk6 | 25507  | 2,20 | up   |
| 5625789 | 7335712 | 1708752 | proprotein convertase subtilisin/kexin type 7 | Pcsk7 | 29606  | 1,12 | down |
| 5690843 | 7335712 | 1708757 | proprotein convertase subtilisin/kexin type 7 | Pcsk7 | 29606  | 1,17 | up   |
| 5724574 | 7335712 | 1708743 | proprotein convertase subtilisin/kexin type 7 | Pcsk7 | 29606  | 1,05 | down |
| 5795343 | 7335712 | 1708742 | proprotein convertase subtilisin/kexin type 7 | Pcsk7 | 29606  | 1,64 | up   |
| 5803271 | 7335712 | 1708756 | proprotein convertase subtilisin/kexin type 7 | Pcsk7 | 29606  | 1,13 | down |
| 5969423 | 7335712 | 1708746 | proprotein convertase subtilisin/kexin type 7 | Pcsk7 | 29606  | 1,10 | up   |
| 5995322 | 7335712 | 1708751 | proprotein convertase subtilisin/kexin type 7 | Pcsk7 | 29606  | 1,14 | up   |
| 6021475 | 7335712 | 1708754 | proprotein convertase subtilisin/kexin type 7 | Pcsk7 | 29606  | 1,15 | down |
| 6041209 | 7335712 | 1708748 | proprotein convertase subtilisin/kexin type 7 | Pcsk7 | 29606  | 2,14 | down |
| 6118112 | 7335712 | 1708749 | proprotein convertase subtilisin/kexin type 7 | Pcsk7 | 29606  | 1,29 | up   |
| 6118801 | 7335712 | 1708755 | proprotein convertase subtilisin/kexin type 7 | Pcsk7 | 29606  | 1,12 | down |
| 6120890 | 7335712 | 1708750 | proprotein convertase subtilisin/kexin type 7 | Pcsk7 | 29606  | 1,05 | down |
| 6351960 | 7335712 | 1708741 | proprotein convertase subtilisin/kexin type 7 | Pcsk7 | 29606  | 1,04 | down |
| 6382767 | 7335712 | 1708742 | proprotein convertase subtilisin/kexin type 7 | Pcsk7 | 29606  | 1,80 | down |
| 6384389 | 7335712 | 1708742 | proprotein convertase subtilisin/kexin type 7 | Pcsk7 | 29606  | 1,04 | up   |
| 6444116 | 7335712 | 1708740 | proprotein convertase subtilisin/kexin type 7 | Pcsk7 | 29606  | 1,01 | down |
| 6459038 | 7335712 | 1708745 | proprotein convertase subtilisin/kexin type 7 | Pcsk7 | 29606  | 1,29 | up   |
| 6540096 | 7335712 | 1708747 | proprotein convertase subtilisin/kexin type 7 | Pcsk7 | 29606  | 1,06 | up   |
| 6617045 | 7335712 | 1708744 | proprotein convertase subtilisin/kexin type 7 | Pcsk7 | 29606  | 1,40 | down |
| 6642269 | 7335712 | 1708753 | proprotein convertase subtilisin/kexin type 7 | Pcsk7 | 29606  | 1,63 | down |
| 5638693 | 7289582 | 1595816 | proprotein convertase subtilisin/kexin type 9 | Pcsk9 | 298296 | 1,98 | down |
| 5683237 | 7289582 | 1595822 | proprotein convertase subtilisin/kexin type 9 | Pcsk9 | 298296 | 1,04 | up   |
| 5693248 | 7289582 | 1595823 | proprotein convertase subtilisin/kexin type 9 | Pcsk9 | 298296 | 1,09 | down |
| 5697214 | 7289582 | 1595820 | proprotein convertase subtilisin/kexin type 9 | Pcsk9 | 298296 | 1,13 | up   |
| 5783974 | 7289582 | 1595819 | proprotein convertase subtilisin/kexin type 9 | Pcsk9 | 298296 | 2,04 | up   |

|         |         |         |                                               |           |        |      |      |
|---------|---------|---------|-----------------------------------------------|-----------|--------|------|------|
| 6014351 | 7289582 | 1595824 | proprotein convertase subtilisin/kexin type 9 | Pcsk9     | 298296 | 1,14 | up   |
| 6061603 | 7289582 | 1595817 | proprotein convertase subtilisin/kexin type 9 | Pcsk9     | 298296 | 1,13 | up   |
| 6238344 | 7289582 | 1595816 | proprotein convertase subtilisin/kexin type 9 | Pcsk9     | 298296 | 1,03 | up   |
| 6264704 | 7289582 | 1595823 | proprotein convertase subtilisin/kexin type 9 | Pcsk9     | 298296 | 1,30 | down |
| 6361269 | 7289582 | 1595821 | proprotein convertase subtilisin/kexin type 9 | Pcsk9     | 298296 | 1,12 | up   |
| 6475715 | 7289582 | 1595826 | proprotein convertase subtilisin/kexin type 9 | Pcsk9     | 298296 | 1,27 | up   |
| 6490403 | 7289582 | 1595814 | proprotein convertase subtilisin/kexin type 9 | Pcsk9     | 298296 | 1,01 | down |
| 6556243 | 7289582 | 1595815 | proprotein convertase subtilisin/kexin type 9 | Pcsk9     | 298296 | 1,09 | down |
| 6567087 | 7289582 | 1595826 | proprotein convertase subtilisin/kexin type 9 | Pcsk9     | 298296 | 1,11 | down |
| 6657284 | 7289582 | 1595825 | proprotein convertase subtilisin/kexin type 9 | Pcsk9     | 298296 | 1,32 | up   |
| 6670538 | 7289582 | 1595826 | proprotein convertase subtilisin/kexin type 9 | Pcsk9     | 298296 | 1,52 | down |
| 6700461 | 7289582 | 1595818 | proprotein convertase subtilisin/kexin type 9 | Pcsk9     | 298296 | 1,68 | down |
| 6059806 | 7244914 | 1485327 | ProSAPIP1 protein                             | Prosapip1 | 280670 | 2,16 | down |
| 6204311 | 7244914 | 1485327 | ProSAPIP1 protein                             | Prosapip1 | 280670 | 1,14 | up   |
| 6395971 | 7244914 | 1485325 | ProSAPIP1 protein                             | Prosapip1 | 280670 | 1,42 | up   |
| 6470385 | 7244914 | 1485326 | ProSAPIP1 protein                             | Prosapip1 | 280670 | 2,07 | up   |
| 6550906 | 7244914 | 1485328 | ProSAPIP1 protein                             | Prosapip1 | 280670 | 1,47 | down |
| 6716840 | 7244914 | 1485327 | ProSAPIP1 protein                             | Prosapip1 | 280670 | 1,11 | down |
| 5654778 | 7184220 | 1336122 | prostaglandin E receptor 1 (subtype EP1)      | Ptger1    | 25637  | 1,25 | up   |
| 5790873 | 7184220 | 1336123 | prostaglandin E receptor 1 (subtype EP1)      | Ptger1    | 25637  | 2,56 | down |
| 5890698 | 7184220 | 1336122 | prostaglandin E receptor 1 (subtype EP1)      | Ptger1    | 25637  | 1,64 | down |
| 5928600 | 7184220 | 1336123 | prostaglandin E receptor 1 (subtype EP1)      | Ptger1    | 25637  | 1,79 | up   |
| 6002727 | 7184220 | 1336122 | prostaglandin E receptor 1 (subtype EP1)      | Ptger1    | 25637  | 1,47 | down |
| 6130496 | 7184220 | 1336122 | prostaglandin E receptor 1 (subtype EP1)      | Ptger1    | 25637  | 1,05 | down |
| 6273558 | 7184220 | 1336121 | prostaglandin E receptor 1 (subtype EP1)      | Ptger1    | 25637  | 1,15 | up   |
| 5662535 | 7224724 | 1433965 | prostaglandin F receptor                      | Ptgfr     | 25652  | 1,00 | up   |
| 5904126 | 7224724 | 1433962 | prostaglandin F receptor                      | Ptgfr     | 25652  | 1,01 | down |
| 6062637 | 7224724 | 1433963 | prostaglandin F receptor                      | Ptgfr     | 25652  | 1,02 | down |
| 6073606 | 7224724 | 1433962 | prostaglandin F receptor                      | Ptgfr     | 25652  | 1,42 | up   |
| 6085124 | 7224724 | 1433964 | prostaglandin F receptor                      | Ptgfr     | 25652  | 1,22 | down |
| 6233449 | 7224724 | 1433964 | prostaglandin F receptor                      | Ptgfr     | 25652  | 1,05 | down |
| 6247406 | 7224724 | 1433962 | prostaglandin F receptor                      | Ptgfr     | 25652  | 1,02 | up   |
| 6603859 | 7224724 | 1433964 | prostaglandin F receptor                      | Ptgfr     | 25652  | 1,04 | down |
| 6677780 | 7224724 | 1433962 | prostaglandin F receptor                      | Ptgfr     | 25652  | 2,37 | down |
| 5717673 | 7212112 | 1403507 | prostaglandin F2 receptor negative regulator  | Ptgfrn    | 29602  | 1,89 | down |
| 5802012 | 7212112 | 1403514 | prostaglandin F2 receptor negative regulator  | Ptgfrn    | 29602  | 1,38 | down |
| 5819337 | 7212112 | 1403509 | prostaglandin F2 receptor negative regulator  | Ptgfrn    | 29602  | 1,22 | down |
| 5878566 | 7212112 | 1403507 | prostaglandin F2 receptor negative regulator  | Ptgfrn    | 29602  | 1,05 | up   |
| 5906034 | 7212112 | 1403511 | prostaglandin F2 receptor negative regulator  | Ptgfrn    | 29602  | 1,22 | up   |
| 6023091 | 7212112 | 1403510 | prostaglandin F2 receptor negative regulator  | Ptgfrn    | 29602  | 1,18 | up   |
| 6134728 | 7212112 | 1403508 | prostaglandin F2 receptor negative regulator  | Ptgfrn    | 29602  | 2,30 | up   |
| 6220127 | 7212112 | 1403507 | prostaglandin F2 receptor negative regulator  | Ptgfrn    | 29602  | 1,42 | down |
| 6265265 | 7212112 | 1403513 | prostaglandin F2 receptor negative regulator  | Ptgfrn    | 29602  | 2,32 | down |
| 6288798 | 7212112 | 1403512 | prostaglandin F2 receptor negative regulator  | Ptgfrn    | 29602  | 1,14 | up   |
| 6409541 | 7212112 | 1403515 | prostaglandin F2 receptor negative regulator  | Ptgfrn    | 29602  | 2,08 | up   |
| 6414355 | 7212112 | 1403507 | prostaglandin F2 receptor negative regulator  | Ptgfrn    | 29602  | 1,31 | down |
| 6415591 | 7212112 | 1403507 | prostaglandin F2 receptor negative regulator  | Ptgfrn    | 29602  | 1,52 | up   |
| 5684701 | 7226581 | 1438845 | prostaglandin-endoperoxide synthase 1         | Ptgs1     | 24693  | 3,12 | up   |
| 5922714 | 7226581 | 1438848 | prostaglandin-endoperoxide synthase 1         | Ptgs1     | 24693  | 1,43 | down |
| 5928468 | 7226581 | 1438844 | prostaglandin-endoperoxide synthase 1         | Ptgs1     | 24693  | 2,13 | down |
| 5948929 | 7226581 | 1438842 | prostaglandin-endoperoxide synthase 1         | Ptgs1     | 24693  | 1,02 | up   |
| 5974964 | 7226581 | 1438843 | prostaglandin-endoperoxide synthase 1         | Ptgs1     | 24693  | 1,55 | down |
| 6009855 | 7226581 | 1438854 | prostaglandin-endoperoxide synthase 1         | Ptgs1     | 24693  | 1,18 | up   |
| 6253802 | 7226581 | 1438853 | prostaglandin-endoperoxide synthase 1         | Ptgs1     | 24693  | 1,11 | up   |
| 6401904 | 7226581 | 1438850 | prostaglandin-endoperoxide synthase 1         | Ptgs1     | 24693  | 1,99 | up   |
| 6408419 | 7226581 | 1438849 | prostaglandin-endoperoxide synthase 1         | Ptgs1     | 24693  | 1,03 | up   |

|         |         |         |                                                                                   |       |       |      |      |
|---------|---------|---------|-----------------------------------------------------------------------------------|-------|-------|------|------|
| 6518736 | 7226581 | 1438852 | prostaglandin-endoperoxide synthase 1                                             | Ptgs1 | 24693 | 1,07 | down |
| 6633518 | 7226581 | 1438851 | prostaglandin-endoperoxide synthase 1                                             | Ptgs1 | 24693 | 1,24 | up   |
| 6636971 | 7226581 | 1438846 | prostaglandin-endoperoxide synthase 1                                             | Ptgs1 | 24693 | 2,60 | up   |
| 6707918 | 7226581 | 1438846 | prostaglandin-endoperoxide synthase 1                                             | Ptgs1 | 24693 | 1,61 | down |
| 6743037 | 7226581 | 1438847 | prostaglandin-endoperoxide synthase 1                                             | Ptgs1 | 24693 | 1,53 | up   |
| 5740134 | 7131912 | 1206132 | proteasome (prosome, macropain) activator subunit 1                               | Psme1 | 29630 | 1,30 | down |
| 5779761 | 7131912 | 1206142 | proteasome (prosome, macropain) activator subunit 1                               | Psme1 | 29630 | 1,16 | up   |
| 5875761 | 7131912 | 1206140 | proteasome (prosome, macropain) activator subunit 1                               | Psme1 | 29630 | 1,31 | up   |
| 5886221 | 7131912 | 1206134 | proteasome (prosome, macropain) activator subunit 1                               | Psme1 | 29630 | 1,91 | up   |
| 5947534 | 7131912 | 1206141 | proteasome (prosome, macropain) activator subunit 1                               | Psme1 | 29630 | 1,13 | down |
| 6226266 | 7131912 | 1206132 | proteasome (prosome, macropain) activator subunit 1                               | Psme1 | 29630 | 5,23 | down |
| 6344178 | 7131912 | 1206133 | proteasome (prosome, macropain) activator subunit 1                               | Psme1 | 29630 | 1,46 | down |
| 6428981 | 7131912 | 1206138 | proteasome (prosome, macropain) activator subunit 1                               | Psme1 | 29630 | 1,00 | up   |
| 6439520 | 7131912 | 1206137 | proteasome (prosome, macropain) activator subunit 1                               | Psme1 | 29630 | 1,23 | up   |
| 6673210 | 7131912 | 1206139 | proteasome (prosome, macropain) activator subunit 1                               | Psme1 | 29630 | 1,10 | up   |
| 6679861 | 7131912 | 1206135 | proteasome (prosome, macropain) activator subunit 1                               | Psme1 | 29630 | 1,01 | down |
| 6707428 | 7131912 | 1206136 | proteasome (prosome, macropain) activator subunit 1                               | Psme1 | 29630 | 1,27 | down |
| 5627023 | 7138231 | 1221639 | proteasome (prosome, macropain) activator subunit 2                               | Psme2 | 29614 | 1,50 | up   |
| 5645294 | 7154573 | 1262092 | proteasome (prosome, macropain) activator subunit 2                               | Psme2 | 29614 | 1,06 | down |
| 5697176 | 7154573 | 1262092 | proteasome (prosome, macropain) activator subunit 2                               | Psme2 | 29614 | 2,69 | up   |
| 5721049 | 7138231 | 1221638 | proteasome (prosome, macropain) activator subunit 2                               | Psme2 | 29614 | 5,75 | down |
| 5928708 | 7154573 | 1262093 | proteasome (prosome, macropain) activator subunit 2                               | Psme2 | 29614 | 1,67 | down |
| 5980344 | 7138231 | 1221648 | proteasome (prosome, macropain) activator subunit 2                               | Psme2 | 29614 | 1,00 | up   |
| 6002854 | 7138231 | 1221645 | proteasome (prosome, macropain) activator subunit 2                               | Psme2 | 29614 | 1,26 | up   |
| 6082963 | 7138231 | 1221646 | proteasome (prosome, macropain) activator subunit 2                               | Psme2 | 29614 | 1,18 | up   |
| 6091893 | 7138231 | 1221643 | proteasome (prosome, macropain) activator subunit 2                               | Psme2 | 29614 | 1,16 | down |
| 6117033 | 7138231 | 1221647 | proteasome (prosome, macropain) activator subunit 2                               | Psme2 | 29614 | 1,33 | down |
| 6359541 | 7138231 | 1221640 | proteasome (prosome, macropain) activator subunit 2                               | Psme2 | 29614 | 1,19 | up   |
| 6570491 | 7138231 | 1221638 | proteasome (prosome, macropain) activator subunit 2                               | Psme2 | 29614 | 1,70 | down |
| 6582658 | 7138231 | 1221644 | proteasome (prosome, macropain) activator subunit 2                               | Psme2 | 29614 | 1,01 | down |
| 6633681 | 7138231 | 1221642 | proteasome (prosome, macropain) activator subunit 2                               | Psme2 | 29614 | 1,05 | down |
| 6640942 | 7138231 | 1221641 | proteasome (prosome, macropain) activator subunit 2                               | Psme2 | 29614 | 1,22 | up   |
| 6641900 | 7138231 | 1221638 | proteasome (prosome, macropain) activator subunit 2                               | Psme2 | 29614 | 1,72 | down |
| 5680063 | 7298286 | 1617412 | proteasome (prosome, macropain) subunit, alpha type 6                             | Psma6 | 29673 | 1,10 | down |
| 5935144 | 7298286 | 1617416 | proteasome (prosome, macropain) subunit, alpha type 6                             | Psma6 | 29673 | 2,07 | down |
| 6001843 | 7298286 | 1617409 | proteasome (prosome, macropain) subunit, alpha type 6                             | Psma6 | 29673 | 1,28 | up   |
| 6022755 | 7298286 | 1617415 | proteasome (prosome, macropain) subunit, alpha type 6                             | Psma6 | 29673 | 1,10 | down |
| 6130412 | 7298286 | 1617411 | proteasome (prosome, macropain) subunit, alpha type 6                             | Psma6 | 29673 | 1,06 | down |
| 6331048 | 7298286 | 1617410 | proteasome (prosome, macropain) subunit, alpha type 6                             | Psma6 | 29673 | 1,12 | up   |
| 6403486 | 7298286 | 1617414 | proteasome (prosome, macropain) subunit, alpha type 6                             | Psma6 | 29673 | 1,51 | up   |
| 6546706 | 7298286 | 1617413 | proteasome (prosome, macropain) subunit, alpha type 6                             | Psma6 | 29673 | 1,15 | down |
| 6003800 | 7220914 | 1425047 | proteasome (prosome, macropain) subunit, beta type 8 (large multifunctional pepti | Psmb8 | 24968 | 1,37 | up   |
| 6014577 | 7220914 | 1425049 | proteasome (prosome, macropain) subunit, beta type 8 (large multifunctional pepti | Psmb8 | 24968 | 1,94 | down |
| 6028161 | 7220914 | 1425045 | proteasome (prosome, macropain) subunit, beta type 8 (large multifunctional pepti | Psmb8 | 24968 | 1,00 | up   |
| 6087279 | 7220914 | 1425044 | proteasome (prosome, macropain) subunit, beta type 8 (large multifunctional pepti | Psmb8 | 24968 | 2,05 | up   |
| 6337981 | 7220914 | 1425046 | proteasome (prosome, macropain) subunit, beta type 8 (large multifunctional pepti | Psmb8 | 24968 | 1,96 | up   |
| 6379607 | 7220914 | 1425048 | proteasome (prosome, macropain) subunit, beta type 8 (large multifunctional pepti | Psmb8 | 24968 | 1,61 | down |
| 6598194 | 7220914 | 1425043 | proteasome (prosome, macropain) subunit, beta type 8 (large multifunctional pepti | Psmb8 | 24968 | 3,27 | down |
| 5737244 | 7216935 | 1415062 | proteasome (prosome, macropain) subunit, beta type 9 (large multifunctional pepti | Psmb9 | 24967 | 1,35 | up   |
| 5768939 | 7216935 | 1415063 | proteasome (prosome, macropain) subunit, beta type 9 (large multifunctional pepti | Psmb9 | 24967 | 3,08 | up   |
| 5838426 | 7216935 | 1415061 | proteasome (prosome, macropain) subunit, beta type 9 (large multifunctional pepti | Psmb9 | 24967 | 1,11 | up   |
| 5950106 | 7216935 | 1415066 | proteasome (prosome, macropain) subunit, beta type 9 (large multifunctional pepti | Psmb9 | 24967 | 1,91 | down |
| 6306253 | 7216935 | 1415060 | proteasome (prosome, macropain) subunit, beta type 9 (large multifunctional pepti | Psmb9 | 24967 | 4,63 | down |
| 6395139 | 7216935 | 1415064 | proteasome (prosome, macropain) subunit, beta type 9 (large multifunctional pepti | Psmb9 | 24967 | 2,16 | up   |
| 6534180 | 7216935 | 1415060 | proteasome (prosome, macropain) subunit, beta type 9 (large multifunctional pepti | Psmb9 | 24967 | 2,76 | down |
| 6686483 | 7216935 | 1415065 | proteasome (prosome, macropain) subunit, beta type 9 (large multifunctional pepti | Psmb9 | 24967 | 2,87 | up   |

|         |         |         |                                                            |       |        |      |      |
|---------|---------|---------|------------------------------------------------------------|-------|--------|------|------|
| 5628005 | 7031833 | 964915  | protein arginine methyltransferase 3                       | Prmt3 | 89820  | 1,39 | down |
| 5692163 | 7031833 | 964910  | protein arginine methyltransferase 3                       | Prmt3 | 89820  | 2,03 | up   |
| 5852780 | 7031833 | 964909  | protein arginine methyltransferase 3                       | Prmt3 | 89820  | 1,66 | up   |
| 5884374 | 7031833 | 964921  | protein arginine methyltransferase 3                       | Prmt3 | 89820  | 1,13 | down |
| 6023441 | 7031833 | 964919  | protein arginine methyltransferase 3                       | Prmt3 | 89820  | 1,12 | up   |
| 6068031 | 7031833 | 964914  | protein arginine methyltransferase 3                       | Prmt3 | 89820  | 1,28 | up   |
| 6212190 | 7031833 | 964916  | protein arginine methyltransferase 3                       | Prmt3 | 89820  | 1,20 | down |
| 6235776 | 7031833 | 964908  | protein arginine methyltransferase 3                       | Prmt3 | 89820  | 1,30 | down |
| 6245481 | 7031833 | 964913  | protein arginine methyltransferase 3                       | Prmt3 | 89820  | 1,23 | down |
| 6256514 | 7031833 | 964924  | protein arginine methyltransferase 3                       | Prmt3 | 89820  | 1,23 | down |
| 6257436 | 7031833 | 964922  | protein arginine methyltransferase 3                       | Prmt3 | 89820  | 1,82 | down |
| 6276384 | 7031833 | 964923  | protein arginine methyltransferase 3                       | Prmt3 | 89820  | 1,03 | up   |
| 6294166 | 7031833 | 964911  | protein arginine methyltransferase 3                       | Prmt3 | 89820  | 1,25 | down |
| 6324786 | 7031833 | 964918  | protein arginine methyltransferase 3                       | Prmt3 | 89820  | 1,01 | down |
| 6435640 | 7031833 | 964912  | protein arginine methyltransferase 3                       | Prmt3 | 89820  | 1,14 | down |
| 6530908 | 7031833 | 964917  | protein arginine methyltransferase 3                       | Prmt3 | 89820  | 1,42 | down |
| 6556572 | 7031833 | 964920  | protein arginine methyltransferase 3                       | Prmt3 | 89820  | 1,13 | down |
| 6643235 | 7031833 | 964908  | protein arginine methyltransferase 3                       | Prmt3 | 89820  | 1,06 | up   |
| 5635651 | 7039821 | 985054  | protein associated with topoisomerase II homolog 1 (yeast) | Pat1l | 361736 | 1,03 | up   |
| 5728795 | 7039821 | 985067  | protein associated with topoisomerase II homolog 1 (yeast) | Pat1l | 361736 | 1,37 | down |
| 5758269 | 7039821 | 985075  | protein associated with topoisomerase II homolog 1 (yeast) | Pat1l | 361736 | 1,21 | up   |
| 5814100 | 7039821 | 985052  | protein associated with topoisomerase II homolog 1 (yeast) | Pat1l | 361736 | 2,06 | down |
| 5823048 | 7039821 | 985059  | protein associated with topoisomerase II homolog 1 (yeast) | Pat1l | 361736 | 1,06 | up   |
| 5851321 | 7039821 | 985055  | protein associated with topoisomerase II homolog 1 (yeast) | Pat1l | 361736 | 1,17 | up   |
| 5890782 | 7039821 | 985066  | protein associated with topoisomerase II homolog 1 (yeast) | Pat1l | 361736 | 1,23 | down |
| 6014636 | 7039821 | 985056  | protein associated with topoisomerase II homolog 1 (yeast) | Pat1l | 361736 | 1,23 | up   |
| 6038478 | 7039821 | 985064  | protein associated with topoisomerase II homolog 1 (yeast) | Pat1l | 361736 | 1,12 | up   |
| 6057739 | 7039821 | 985075  | protein associated with topoisomerase II homolog 1 (yeast) | Pat1l | 361736 | 1,09 | down |
| 6092737 | 7039821 | 985063  | protein associated with topoisomerase II homolog 1 (yeast) | Pat1l | 361736 | 1,04 | down |
| 6208315 | 7039821 | 985071  | protein associated with topoisomerase II homolog 1 (yeast) | Pat1l | 361736 | 1,11 | up   |
| 6217574 | 7039821 | 985072  | protein associated with topoisomerase II homolog 1 (yeast) | Pat1l | 361736 | 1,01 | up   |
| 6252716 | 7039821 | 985059  | protein associated with topoisomerase II homolog 1 (yeast) | Pat1l | 361736 | 1,25 | up   |
| 6269038 | 7039821 | 985057  | protein associated with topoisomerase II homolog 1 (yeast) | Pat1l | 361736 | 1,01 | down |
| 6381148 | 7039821 | 985075  | protein associated with topoisomerase II homolog 1 (yeast) | Pat1l | 361736 | 1,03 | up   |
| 6414552 | 7039821 | 985061  | protein associated with topoisomerase II homolog 1 (yeast) | Pat1l | 361736 | 1,11 | up   |
| 6417102 | 7039821 | 985070  | protein associated with topoisomerase II homolog 1 (yeast) | Pat1l | 361736 | 1,22 | up   |
| 6440141 | 7039821 | 985074  | protein associated with topoisomerase II homolog 1 (yeast) | Pat1l | 361736 | 1,07 | up   |
| 6451990 | 7039821 | 985062  | protein associated with topoisomerase II homolog 1 (yeast) | Pat1l | 361736 | 1,06 | up   |
| 6545159 | 7039821 | 985065  | protein associated with topoisomerase II homolog 1 (yeast) | Pat1l | 361736 | 1,04 | up   |
| 6569281 | 7039821 | 985075  | protein associated with topoisomerase II homolog 1 (yeast) | Pat1l | 361736 | 1,06 | down |
| 6683279 | 7039821 | 985068  | protein associated with topoisomerase II homolog 1 (yeast) | Pat1l | 361736 | 1,43 | down |
| 5619288 | 7231826 | 1452257 | protein disulfide isomerase family A, member 3             | Pdia3 | 29468  | 1,06 | down |
| 5629088 | 7231826 | 1452244 | protein disulfide isomerase family A, member 3             | Pdia3 | 29468  | 1,01 | up   |
| 5825336 | 7231826 | 1452253 | protein disulfide isomerase family A, member 3             | Pdia3 | 29468  | 1,02 | down |
| 5989734 | 7231826 | 1452251 | protein disulfide isomerase family A, member 3             | Pdia3 | 29468  | 1,04 | up   |
| 5997948 | 7231826 | 1452247 | protein disulfide isomerase family A, member 3             | Pdia3 | 29468  | 1,15 | down |
| 6015334 | 7231826 | 1452254 | protein disulfide isomerase family A, member 3             | Pdia3 | 29468  | 1,12 | down |
| 6060615 | 7231826 | 1452250 | protein disulfide isomerase family A, member 3             | Pdia3 | 29468  | 1,02 | down |
| 6077655 | 7231826 | 1452256 | protein disulfide isomerase family A, member 3             | Pdia3 | 29468  | 1,05 | up   |
| 6208590 | 7231826 | 1452246 | protein disulfide isomerase family A, member 3             | Pdia3 | 29468  | 1,04 | up   |
| 6224715 | 7231826 | 1452255 | protein disulfide isomerase family A, member 3             | Pdia3 | 29468  | 2,23 | down |
| 6272115 | 7231826 | 1452252 | protein disulfide isomerase family A, member 3             | Pdia3 | 29468  | 1,12 | up   |
| 6504075 | 7231826 | 1452244 | protein disulfide isomerase family A, member 3             | Pdia3 | 29468  | 1,04 | up   |
| 6544050 | 7231826 | 1452245 | protein disulfide isomerase family A, member 3             | Pdia3 | 29468  | 1,11 | up   |
| 6593940 | 7231826 | 1452248 | protein disulfide isomerase family A, member 3             | Pdia3 | 29468  | 1,14 | down |
| 6615629 | 7231826 | 1452249 | protein disulfide isomerase family A, member 3             | Pdia3 | 29468  | 1,25 | down |

|         |         |         |                                                                           |         |        |      |      |
|---------|---------|---------|---------------------------------------------------------------------------|---------|--------|------|------|
| 5862080 | 7206437 | 1390669 | protein kinase (cAMP-dependent, catalytic) inhibitor alpha                | Pkia    | 114906 | 2,06 | up   |
| 6060594 | 7206437 | 1390670 | protein kinase (cAMP-dependent, catalytic) inhibitor alpha                | Pkia    | 114906 | 1,09 | up   |
| 6695803 | 7206437 | 1390670 | protein kinase (cAMP-dependent, catalytic) inhibitor alpha                | Pkia    | 114906 | 1,01 | down |
| 5654942 | 7247954 | 1492378 | protein kinase C binding protein 1                                        | Prkcbp1 | 296374 | 1,09 | up   |
| 5705074 | 7247954 | 1492380 | protein kinase C binding protein 1                                        | Prkcbp1 | 296374 | 1,15 | down |
| 5708050 | 7247954 | 1492368 | protein kinase C binding protein 1                                        | Prkcbp1 | 296374 | 1,09 | down |
| 5749468 | 7247954 | 1492375 | protein kinase C binding protein 1                                        | Prkcbp1 | 296374 | 1,08 | down |
| 5750401 | 7247954 | 1492375 | protein kinase C binding protein 1                                        | Prkcbp1 | 296374 | 1,21 | down |
| 5758463 | 7247954 | 1492375 | protein kinase C binding protein 1                                        | Prkcbp1 | 296374 | 1,15 | up   |
| 5777733 | 7247954 | 1492376 | protein kinase C binding protein 1                                        | Prkcbp1 | 296374 | 1,12 | down |
| 5796088 | 7247954 | 1492386 | protein kinase C binding protein 1                                        | Prkcbp1 | 296374 | 1,26 | up   |
| 5817854 | 7247954 | 1492371 | protein kinase C binding protein 1                                        | Prkcbp1 | 296374 | 1,07 | down |
| 5838941 | 7247954 | 1492362 | protein kinase C binding protein 1                                        | Prkcbp1 | 296374 | 1,28 | up   |
| 5970483 | 7247954 | 1492368 | protein kinase C binding protein 1                                        | Prkcbp1 | 296374 | 1,08 | up   |
| 5972656 | 7247954 | 1492372 | protein kinase C binding protein 1                                        | Prkcbp1 | 296374 | 1,19 | up   |
| 6174755 | 7247954 | 1492379 | protein kinase C binding protein 1                                        | Prkcbp1 | 296374 | 1,04 | up   |
| 6211220 | 7247954 | 1492395 | protein kinase C binding protein 1                                        | Prkcbp1 | 296374 | 1,05 | up   |
| 6269385 | 7247954 | 1492364 | protein kinase C binding protein 1                                        | Prkcbp1 | 296374 | 1,23 | down |
| 6279605 | 7247954 | 1492363 | protein kinase C binding protein 1                                        | Prkcbp1 | 296374 | 1,28 | down |
| 6362445 | 7247954 | 1492384 | protein kinase C binding protein 1                                        | Prkcbp1 | 296374 | 1,47 | up   |
| 6391636 | 7247954 | 1492382 | protein kinase C binding protein 1                                        | Prkcbp1 | 296374 | 1,12 | up   |
| 6427246 | 7247954 | 1492374 | protein kinase C binding protein 1                                        | Prkcbp1 | 296374 | 1,52 | up   |
| 6473577 | 7247954 | 1492368 | protein kinase C binding protein 1                                        | Prkcbp1 | 296374 | 1,77 | down |
| 6480593 | 7247954 | 1492366 | protein kinase C binding protein 1                                        | Prkcbp1 | 296374 | 1,13 | down |
| 6530376 | 7247954 | 1492372 | protein kinase C binding protein 1                                        | Prkcbp1 | 296374 | 1,27 | down |
| 6551773 | 7247954 | 1492357 | protein kinase C binding protein 1                                        | Prkcbp1 | 296374 | 1,09 | up   |
| 6580683 | 7247954 | 1492384 | protein kinase C binding protein 1                                        | Prkcbp1 | 296374 | 1,10 | up   |
| 6600834 | 7247954 | 1492370 | protein kinase C binding protein 1                                        | Prkcbp1 | 296374 | 1,24 | down |
| 6603360 | 7247954 | 1492359 | protein kinase C binding protein 1                                        | Prkcbp1 | 296374 | 1,03 | up   |
| 6619710 | 7247954 | 1492361 | protein kinase C binding protein 1                                        | Prkcbp1 | 296374 | 1,11 | up   |
| 6713048 | 7247954 | 1492381 | protein kinase C binding protein 1                                        | Prkcbp1 | 296374 | 1,38 | down |
| 5805466 | 7148661 | 1247677 | protein kinase C, delta                                                   | Prkcd   | 170538 | 1,13 | up   |
| 5878674 | 7148661 | 1247669 | protein kinase C, delta                                                   | Prkcd   | 170538 | 1,08 | down |
| 5899357 | 7148661 | 1247679 | protein kinase C, delta                                                   | Prkcd   | 170538 | 1,17 | up   |
| 5905631 | 7148661 | 1247681 | protein kinase C, delta                                                   | Prkcd   | 170538 | 1,11 | down |
| 5988845 | 7148661 | 1247683 | protein kinase C, delta                                                   | Prkcd   | 170538 | 1,59 | down |
| 5996262 | 7148661 | 1247678 | protein kinase C, delta                                                   | Prkcd   | 170538 | 1,23 | up   |
| 6064478 | 7148661 | 1247682 | protein kinase C, delta                                                   | Prkcd   | 170538 | 1,05 | down |
| 6081765 | 7148661 | 1247666 | protein kinase C, delta                                                   | Prkcd   | 170538 | 2,22 | up   |
| 6132750 | 7148661 | 1247675 | protein kinase C, delta                                                   | Prkcd   | 170538 | 1,19 | down |
| 6192260 | 7148661 | 1247667 | protein kinase C, delta                                                   | Prkcd   | 170538 | 1,20 | down |
| 6200098 | 7148661 | 1247673 | protein kinase C, delta                                                   | Prkcd   | 170538 | 1,17 | down |
| 6241087 | 7148661 | 1247672 | protein kinase C, delta                                                   | Prkcd   | 170538 | 1,12 | up   |
| 6280818 | 7148661 | 1247680 | protein kinase C, delta                                                   | Prkcd   | 170538 | 1,25 | up   |
| 6482999 | 7148661 | 1247674 | protein kinase C, delta                                                   | Prkcd   | 170538 | 1,35 | up   |
| 6559632 | 7148661 | 1247671 | protein kinase C, delta                                                   | Prkcd   | 170538 | 1,07 | down |
| 6564496 | 7148661 | 1247668 | protein kinase C, delta                                                   | Prkcd   | 170538 | 1,18 | down |
| 6604913 | 7148661 | 1247670 | protein kinase C, delta                                                   | Prkcd   | 170538 | 2,54 | up   |
| 6636206 | 7148661 | 1247676 | protein kinase C, delta                                                   | Prkcd   | 170538 | 1,28 | up   |
| 6688884 | 7148661 | 1247668 | protein kinase C, delta                                                   | Prkcd   | 170538 | 1,22 | up   |
| 5699723 | 7219186 | 1420912 | protein kinase inhibitor beta, (cAMP-dependent, catalytic) inhibitor beta | Pkib    | 24678  | 1,79 | up   |
| 5826952 | 7219186 | 1420916 | protein kinase inhibitor beta, (cAMP-dependent, catalytic) inhibitor beta | Pkib    | 24678  | 1,02 | down |
| 5898478 | 7219186 | 1420915 | protein kinase inhibitor beta, (cAMP-dependent, catalytic) inhibitor beta | Pkib    | 24678  | 1,03 | down |
| 5953971 | 7219186 | 1420917 | protein kinase inhibitor beta, (cAMP-dependent, catalytic) inhibitor beta | Pkib    | 24678  | 1,15 | down |
| 6146324 | 7219186 | 1420913 | protein kinase inhibitor beta, (cAMP-dependent, catalytic) inhibitor beta | Pkib    | 24678  | 2,38 | up   |
| 6614929 | 7219186 | 1420917 | protein kinase inhibitor beta, (cAMP-dependent, catalytic) inhibitor beta | Pkib    | 24678  | 1,14 | down |

|         |         |         |                                                                           |          |        |      |      |
|---------|---------|---------|---------------------------------------------------------------------------|----------|--------|------|------|
| 6712267 | 7219186 | 1420914 | protein kinase inhibitor beta, (cAMP-dependent, catalytic) inhibitor beta | Pkib     | 24678  | 1,24 | up   |
| 5746863 | 7098837 | 1124885 | protein kinase, AMP-activated, beta 1 non-catalytic subunit               | Prkab1   | 83803  | 1,62 | up   |
| 6025113 | 7098837 | 1124886 | protein kinase, AMP-activated, beta 1 non-catalytic subunit               | Prkab1   | 83803  | 1,03 | down |
| 6041588 | 7098837 | 1124889 | protein kinase, AMP-activated, beta 1 non-catalytic subunit               | Prkab1   | 83803  | 1,02 | down |
| 6203234 | 7098837 | 1124888 | protein kinase, AMP-activated, beta 1 non-catalytic subunit               | Prkab1   | 83803  | 1,04 | down |
| 6428678 | 7098837 | 1124892 | protein kinase, AMP-activated, beta 1 non-catalytic subunit               | Prkab1   | 83803  | 1,03 | down |
| 6544397 | 7098837 | 1124890 | protein kinase, AMP-activated, beta 1 non-catalytic subunit               | Prkab1   | 83803  | 1,05 | up   |
| 6589740 | 7098837 | 1124893 | protein kinase, AMP-activated, beta 1 non-catalytic subunit               | Prkab1   | 83803  | 2,49 | down |
| 6648226 | 7098837 | 1124891 | protein kinase, AMP-activated, beta 1 non-catalytic subunit               | Prkab1   | 83803  | 1,09 | down |
| 6707188 | 7098837 | 1124887 | protein kinase, AMP-activated, beta 1 non-catalytic subunit               | Prkab1   | 83803  | 1,18 | up   |
| 5687555 | 7363772 | 1778618 | protein kinase, AMP-activated, gamma 3 non-catalytic subunit              | Prkag3   | 301518 | 1,01 | down |
| 5793335 | 7363772 | 1778614 | protein kinase, AMP-activated, gamma 3 non-catalytic subunit              | Prkag3   | 301518 | 1,49 | up   |
| 5826156 | 7363772 | 1778612 | protein kinase, AMP-activated, gamma 3 non-catalytic subunit              | Prkag3   | 301518 | 1,35 | up   |
| 5829827 | 7363772 | 1778618 | protein kinase, AMP-activated, gamma 3 non-catalytic subunit              | Prkag3   | 301518 | 1,00 | up   |
| 5906489 | 7363772 | 1778615 | protein kinase, AMP-activated, gamma 3 non-catalytic subunit              | Prkag3   | 301518 | 1,22 | up   |
| 6005484 | 7363772 | 1778617 | protein kinase, AMP-activated, gamma 3 non-catalytic subunit              | Prkag3   | 301518 | 1,09 | down |
| 6067138 | 7363772 | 1778618 | protein kinase, AMP-activated, gamma 3 non-catalytic subunit              | Prkag3   | 301518 | 1,21 | down |
| 6175197 | 7363772 | 1778611 | protein kinase, AMP-activated, gamma 3 non-catalytic subunit              | Prkag3   | 301518 | 1,85 | down |
| 6252902 | 7363772 | 1778609 | protein kinase, AMP-activated, gamma 3 non-catalytic subunit              | Prkag3   | 301518 | 1,01 | up   |
| 6283430 | 7363772 | 1778621 | protein kinase, AMP-activated, gamma 3 non-catalytic subunit              | Prkag3   | 301518 | 1,07 | down |
| 6317483 | 7363772 | 1778613 | protein kinase, AMP-activated, gamma 3 non-catalytic subunit              | Prkag3   | 301518 | 1,60 | down |
| 6375010 | 7363772 | 1778608 | protein kinase, AMP-activated, gamma 3 non-catalytic subunit              | Prkag3   | 301518 | 1,42 | down |
| 6437489 | 7363772 | 1778616 | protein kinase, AMP-activated, gamma 3 non-catalytic subunit              | Prkag3   | 301518 | 1,94 | down |
| 6457024 | 7363772 | 1778619 | protein kinase, AMP-activated, gamma 3 non-catalytic subunit              | Prkag3   | 301518 | 1,24 | up   |
| 6530968 | 7363772 | 1778610 | protein kinase, AMP-activated, gamma 3 non-catalytic subunit              | Prkag3   | 301518 | 1,04 | up   |
| 6742797 | 7363772 | 1778609 | protein kinase, AMP-activated, gamma 3 non-catalytic subunit              | Prkag3   | 301518 | 1,04 | up   |
| 5618648 | 7111361 | 1155584 | protein phosphatase 1, regulatory (inhibitor) subunit 12B                 | Ppp1r12b | 304813 | 1,23 | up   |
| 5660438 | 7111361 | 1155580 | protein phosphatase 1, regulatory (inhibitor) subunit 12B                 | Ppp1r12b | 304813 | 1,57 | down |
| 5677831 | 7111361 | 1155616 | protein phosphatase 1, regulatory (inhibitor) subunit 12B                 | Ppp1r12b | 304813 | 1,01 | up   |
| 5684798 | 7111361 | 1155581 | protein phosphatase 1, regulatory (inhibitor) subunit 12B                 | Ppp1r12b | 304813 | 1,13 | up   |
| 5694362 | 7111361 | 1155580 | protein phosphatase 1, regulatory (inhibitor) subunit 12B                 | Ppp1r12b | 304813 | 1,02 | up   |
| 5710094 | 7111361 | 1155595 | protein phosphatase 1, regulatory (inhibitor) subunit 12B                 | Ppp1r12b | 304813 | 1,02 | up   |
| 5733093 | 7111361 | 1155583 | protein phosphatase 1, regulatory (inhibitor) subunit 12B                 | Ppp1r12b | 304813 | 1,35 | down |
| 5764617 | 7111361 | 1155610 | protein phosphatase 1, regulatory (inhibitor) subunit 12B                 | Ppp1r12b | 304813 | 2,13 | down |
| 5781289 | 7111361 | 1155596 | protein phosphatase 1, regulatory (inhibitor) subunit 12B                 | Ppp1r12b | 304813 | 1,47 | up   |
| 5817782 | 7111361 | 1155577 | protein phosphatase 1, regulatory (inhibitor) subunit 12B                 | Ppp1r12b | 304813 | 1,39 | up   |
| 5887023 | 7111361 | 1155609 | protein phosphatase 1, regulatory (inhibitor) subunit 12B                 | Ppp1r12b | 304813 | 1,12 | down |
| 5896604 | 7111361 | 1155614 | protein phosphatase 1, regulatory (inhibitor) subunit 12B                 | Ppp1r12b | 304813 | 1,30 | up   |
| 6027839 | 7111361 | 1155598 | protein phosphatase 1, regulatory (inhibitor) subunit 12B                 | Ppp1r12b | 304813 | 1,00 | up   |
| 6086414 | 7111361 | 1155613 | protein phosphatase 1, regulatory (inhibitor) subunit 12B                 | Ppp1r12b | 304813 | 1,30 | down |
| 6086669 | 7111361 | 1155624 | protein phosphatase 1, regulatory (inhibitor) subunit 12B                 | Ppp1r12b | 304813 | 1,05 | up   |
| 6153362 | 7111361 | 1155578 | protein phosphatase 1, regulatory (inhibitor) subunit 12B                 | Ppp1r12b | 304813 | 2,18 | up   |
| 6179004 | 7111361 | 1155601 | protein phosphatase 1, regulatory (inhibitor) subunit 12B                 | Ppp1r12b | 304813 | 1,21 | down |
| 6210889 | 7111361 | 1155612 | protein phosphatase 1, regulatory (inhibitor) subunit 12B                 | Ppp1r12b | 304813 | 1,17 | up   |
| 6225332 | 7111361 | 1155582 | protein phosphatase 1, regulatory (inhibitor) subunit 12B                 | Ppp1r12b | 304813 | 1,11 | up   |
| 6239772 | 7111361 | 1155593 | protein phosphatase 1, regulatory (inhibitor) subunit 12B                 | Ppp1r12b | 304813 | 1,14 | down |
| 6346145 | 7111361 | 1155607 | protein phosphatase 1, regulatory (inhibitor) subunit 12B                 | Ppp1r12b | 304813 | 1,22 | up   |
| 6473723 | 7111361 | 1155608 | protein phosphatase 1, regulatory (inhibitor) subunit 12B                 | Ppp1r12b | 304813 | 1,54 | up   |
| 6499568 | 7111361 | 1155611 | protein phosphatase 1, regulatory (inhibitor) subunit 12B                 | Ppp1r12b | 304813 | 1,07 | down |
| 6535287 | 7111361 | 1155580 | protein phosphatase 1, regulatory (inhibitor) subunit 12B                 | Ppp1r12b | 304813 | 2,19 | down |
| 6578065 | 7111361 | 1155584 | protein phosphatase 1, regulatory (inhibitor) subunit 12B                 | Ppp1r12b | 304813 | 1,48 | up   |
| 6630993 | 7111361 | 1155605 | protein phosphatase 1, regulatory (inhibitor) subunit 12B                 | Ppp1r12b | 304813 | 1,07 | up   |
| 6667041 | 7111361 | 1155604 | protein phosphatase 1, regulatory (inhibitor) subunit 12B                 | Ppp1r12b | 304813 | 1,03 | down |
| 6724619 | 7111361 | 1155595 | protein phosphatase 1, regulatory (inhibitor) subunit 12B                 | Ppp1r12b | 304813 | 2,02 | down |
| 6725796 | 7111361 | 1155594 | protein phosphatase 1, regulatory (inhibitor) subunit 12B                 | Ppp1r12b | 304813 | 1,03 | down |
| 5630730 | 7039336 | 983975  | protein phosphatase 1, regulatory (inhibitor) subunit 14B                 | Ppp1r14b | 259225 | 1,13 | down |

|         |         |         |                                                                          |          |        |      |      |
|---------|---------|---------|--------------------------------------------------------------------------|----------|--------|------|------|
| 5688911 | 7039336 | 983973  | protein phosphatase 1, regulatory (inhibitor) subunit 14B                | Ppp1r14b | 259225 | 1,02 | down |
| 6036747 | 7039336 | 983976  | protein phosphatase 1, regulatory (inhibitor) subunit 14B                | Ppp1r14b | 259225 | 1,19 | down |
| 6072154 | 7039336 | 983977  | protein phosphatase 1, regulatory (inhibitor) subunit 14B                | Ppp1r14b | 259225 | 2,48 | down |
| 6285399 | 7039336 | 983973  | protein phosphatase 1, regulatory (inhibitor) subunit 14B                | Ppp1r14b | 259225 | 1,17 | up   |
| 6302660 | 7039336 | 983974  | protein phosphatase 1, regulatory (inhibitor) subunit 14B                | Ppp1r14b | 259225 | 1,09 | up   |
| 5763028 | 7051029 | 1011852 | protein phosphatase 1, regulatory (inhibitor) subunit 15A                | Ppp1r15a | 171071 | 1,69 | up   |
| 6006338 | 7051029 | 1011853 | protein phosphatase 1, regulatory (inhibitor) subunit 15A                | Ppp1r15a | 171071 | 1,26 | up   |
| 6385013 | 7051029 | 1011852 | protein phosphatase 1, regulatory (inhibitor) subunit 15A                | Ppp1r15a | 171071 | 1,09 | up   |
| 6402875 | 7051029 | 1011851 | protein phosphatase 1, regulatory (inhibitor) subunit 15A                | Ppp1r15a | 171071 | 1,33 | up   |
| 6507731 | 7051029 | 1011850 | protein phosphatase 1, regulatory (inhibitor) subunit 15A                | Ppp1r15a | 171071 | 4,58 | down |
| 6602610 | 7051029 | 1011850 | protein phosphatase 1, regulatory (inhibitor) subunit 15A                | Ppp1r15a | 171071 | 3,17 | down |
| 6603886 | 7051029 | 1011852 | protein phosphatase 1, regulatory (inhibitor) subunit 15A                | Ppp1r15a | 171071 | 1,29 | up   |
| 6717968 | 7051029 | 1011850 | protein phosphatase 1, regulatory (inhibitor) subunit 15A                | Ppp1r15a | 171071 | 1,45 | down |
| 6729981 | 7051029 | 1011850 | protein phosphatase 1, regulatory (inhibitor) subunit 15A                | Ppp1r15a | 171071 | 3,59 | down |
| 5678333 | 7332324 | 1701242 | protein phosphatase 1, regulatory (inhibitor) subunit 1A                 | Ppp1r1a  | 58977  | 1,22 | up   |
| 5778279 | 7332324 | 1701240 | protein phosphatase 1, regulatory (inhibitor) subunit 1A                 | Ppp1r1a  | 58977  | 1,06 | up   |
| 5884137 | 7332324 | 1701237 | protein phosphatase 1, regulatory (inhibitor) subunit 1A                 | Ppp1r1a  | 58977  | 1,13 | down |
| 6017136 | 7332324 | 1701243 | protein phosphatase 1, regulatory (inhibitor) subunit 1A                 | Ppp1r1a  | 58977  | 2,13 | up   |
| 6038815 | 7332324 | 1701241 | protein phosphatase 1, regulatory (inhibitor) subunit 1A                 | Ppp1r1a  | 58977  | 1,03 | down |
| 6060683 | 7332324 | 1701237 | protein phosphatase 1, regulatory (inhibitor) subunit 1A                 | Ppp1r1a  | 58977  | 1,05 | down |
| 6089240 | 7332324 | 1701239 | protein phosphatase 1, regulatory (inhibitor) subunit 1A                 | Ppp1r1a  | 58977  | 1,02 | up   |
| 6445719 | 7332324 | 1701237 | protein phosphatase 1, regulatory (inhibitor) subunit 1A                 | Ppp1r1a  | 58977  | 1,28 | down |
| 6520030 | 7332324 | 1701238 | protein phosphatase 1, regulatory (inhibitor) subunit 1A                 | Ppp1r1a  | 58977  | 1,08 | up   |
| 6618507 | 7332324 | 1701237 | protein phosphatase 1, regulatory (inhibitor) subunit 1A                 | Ppp1r1a  | 58977  | 1,18 | down |
| 6642665 | 7332324 | 1701243 | protein phosphatase 1, regulatory (inhibitor) subunit 1A                 | Ppp1r1a  | 58977  | 1,04 | up   |
| 5692688 | 7071827 | 1060606 | protein phosphatase 1, regulatory (inhibitor) subunit 1B                 | Ppp1r1b  | 360616 | 1,03 | down |
| 5818845 | 7071827 | 1060601 | protein phosphatase 1, regulatory (inhibitor) subunit 1B                 | Ppp1r1b  | 360616 | 1,04 | down |
| 5873102 | 7071827 | 1060602 | protein phosphatase 1, regulatory (inhibitor) subunit 1B                 | Ppp1r1b  | 360616 | 1,48 | down |
| 6140791 | 7071827 | 1060604 | protein phosphatase 1, regulatory (inhibitor) subunit 1B                 | Ppp1r1b  | 360616 | 1,02 | up   |
| 6161474 | 7071827 | 1060600 | protein phosphatase 1, regulatory (inhibitor) subunit 1B                 | Ppp1r1b  | 360616 | 2,49 | down |
| 6215469 | 7071827 | 1060603 | protein phosphatase 1, regulatory (inhibitor) subunit 1B                 | Ppp1r1b  | 360616 | 1,43 | up   |
| 6258664 | 7071827 | 1060600 | protein phosphatase 1, regulatory (inhibitor) subunit 1B                 | Ppp1r1b  | 360616 | 1,09 | up   |
| 6301436 | 7071827 | 1060600 | protein phosphatase 1, regulatory (inhibitor) subunit 1B                 | Ppp1r1b  | 360616 | 1,03 | up   |
| 6342610 | 7071827 | 1060600 | protein phosphatase 1, regulatory (inhibitor) subunit 1B                 | Ppp1r1b  | 360616 | 1,28 | down |
| 6404712 | 7071827 | 1060603 | protein phosphatase 1, regulatory (inhibitor) subunit 1B                 | Ppp1r1b  | 360616 | 1,05 | up   |
| 6443173 | 7071827 | 1060605 | protein phosphatase 1, regulatory (inhibitor) subunit 1B                 | Ppp1r1b  | 360616 | 1,00 | up   |
| 5628879 | 7349404 | 1743388 | protein phosphatase 2 (formerly 2A), regulatory subunit B", alpha        | Ppp2r3a  | 363122 | 1,00 | up   |
| 5695984 | 7349404 | 1743390 | protein phosphatase 2 (formerly 2A), regulatory subunit B", alpha        | Ppp2r3a  | 363122 | 1,30 | down |
| 5763225 | 7349404 | 1743382 | protein phosphatase 2 (formerly 2A), regulatory subunit B", alpha        | Ppp2r3a  | 363122 | 1,05 | down |
| 5767548 | 7349404 | 1743385 | protein phosphatase 2 (formerly 2A), regulatory subunit B", alpha        | Ppp2r3a  | 363122 | 1,95 | up   |
| 5776093 | 7349404 | 1743386 | protein phosphatase 2 (formerly 2A), regulatory subunit B", alpha        | Ppp2r3a  | 363122 | 1,63 | up   |
| 5846513 | 7349404 | 1743384 | protein phosphatase 2 (formerly 2A), regulatory subunit B", alpha        | Ppp2r3a  | 363122 | 1,02 | up   |
| 5922880 | 7349404 | 1743378 | protein phosphatase 2 (formerly 2A), regulatory subunit B", alpha        | Ppp2r3a  | 363122 | 1,17 | up   |
| 6144144 | 7349404 | 1743381 | protein phosphatase 2 (formerly 2A), regulatory subunit B", alpha        | Ppp2r3a  | 363122 | 1,29 | down |
| 6361071 | 7349404 | 1743387 | protein phosphatase 2 (formerly 2A), regulatory subunit B", alpha        | Ppp2r3a  | 363122 | 1,17 | down |
| 6406493 | 7349404 | 1743382 | protein phosphatase 2 (formerly 2A), regulatory subunit B", alpha        | Ppp2r3a  | 363122 | 2,17 | up   |
| 6420735 | 7349404 | 1743389 | protein phosphatase 2 (formerly 2A), regulatory subunit B", alpha        | Ppp2r3a  | 363122 | 1,29 | up   |
| 6459164 | 7349404 | 1743379 | protein phosphatase 2 (formerly 2A), regulatory subunit B", alpha        | Ppp2r3a  | 363122 | 1,13 | down |
| 6460400 | 7349404 | 1743380 | protein phosphatase 2 (formerly 2A), regulatory subunit B", alpha        | Ppp2r3a  | 363122 | 1,76 | down |
| 6546148 | 7349404 | 1743377 | protein phosphatase 2 (formerly 2A), regulatory subunit B", alpha        | Ppp2r3a  | 363122 | 1,46 | down |
| 6565072 | 7349404 | 1743383 | protein phosphatase 2 (formerly 2A), regulatory subunit B", alpha        | Ppp2r3a  | 363122 | 1,01 | up   |
| 6660710 | 7349404 | 1743390 | protein phosphatase 2 (formerly 2A), regulatory subunit B", alpha        | Ppp2r3a  | 363122 | 1,01 | up   |
| 6721421 | 7349404 | 1743389 | protein phosphatase 2 (formerly 2A), regulatory subunit B", alpha        | Ppp2r3a  | 363122 | 1,15 | down |
| 5721785 | 7127022 | 1194056 | protein phosphatase 2 (formerly 2A), regulatory subunit B, gamma isoform | Ppp2r2c  | 117256 | 1,02 | down |
| 5728807 | 7127022 | 1194060 | protein phosphatase 2 (formerly 2A), regulatory subunit B, gamma isoform | Ppp2r2c  | 117256 | 1,24 | down |
| 5805165 | 7127022 | 1194061 | protein phosphatase 2 (formerly 2A), regulatory subunit B, gamma isoform | Ppp2r2c  | 117256 | 1,12 | up   |



|         |         |         |                                                                          |         |        |      |      |
|---------|---------|---------|--------------------------------------------------------------------------|---------|--------|------|------|
| 5867669 | 7127022 | 1194058 | protein phosphatase 2 (formerly 2A), regulatory subunit B, gamma isoform | Ppp2r2c | 117256 | 1,49 | down |
| 5960880 | 7127022 | 1194057 | protein phosphatase 2 (formerly 2A), regulatory subunit B, gamma isoform | Ppp2r2c | 117256 | 1,17 | down |
| 6145588 | 7127022 | 1194062 | protein phosphatase 2 (formerly 2A), regulatory subunit B, gamma isoform | Ppp2r2c | 117256 | 1,04 | down |
| 6471966 | 7127022 | 1194064 | protein phosphatase 2 (formerly 2A), regulatory subunit B, gamma isoform | Ppp2r2c | 117256 | 1,18 | up   |
| 6620556 | 7127022 | 1194059 | protein phosphatase 2 (formerly 2A), regulatory subunit B, gamma isoform | Ppp2r2c | 117256 | 1,13 | up   |
| 6659755 | 7127022 | 1194063 | protein phosphatase 2 (formerly 2A), regulatory subunit B, gamma isoform | Ppp2r2c | 117256 | 1,03 | down |
| 5712198 | 7309604 | 1646363 | protein tyrosine phosphatase, non-receptor type 21                       | Ptpn21  | 171070 | 1,11 | up   |
| 5717790 | 7309604 | 1646368 | protein tyrosine phosphatase, non-receptor type 21                       | Ptpn21  | 171070 | 1,17 | up   |
| 5720872 | 7309604 | 1646365 | protein tyrosine phosphatase, non-receptor type 21                       | Ptpn21  | 171070 | 1,00 | up   |
| 5780953 | 7309604 | 1646360 | protein tyrosine phosphatase, non-receptor type 21                       | Ptpn21  | 171070 | 1,67 | up   |
| 5797324 | 7309604 | 1646367 | protein tyrosine phosphatase, non-receptor type 21                       | Ptpn21  | 171070 | 1,22 | up   |
| 5864203 | 7309604 | 1646361 | protein tyrosine phosphatase, non-receptor type 21                       | Ptpn21  | 171070 | 1,83 | down |
| 5961191 | 7309604 | 1646369 | protein tyrosine phosphatase, non-receptor type 21                       | Ptpn21  | 171070 | 1,28 | up   |
| 6009416 | 7309604 | 1646364 | protein tyrosine phosphatase, non-receptor type 21                       | Ptpn21  | 171070 | 1,63 | up   |
| 6026650 | 7309604 | 1646354 | protein tyrosine phosphatase, non-receptor type 21                       | Ptpn21  | 171070 | 1,30 | down |
| 6068254 | 7309604 | 1646370 | protein tyrosine phosphatase, non-receptor type 21                       | Ptpn21  | 171070 | 1,08 | down |
| 6106398 | 7309604 | 1646364 | protein tyrosine phosphatase, non-receptor type 21                       | Ptpn21  | 171070 | 1,05 | up   |
| 6110799 | 7309604 | 1646366 | protein tyrosine phosphatase, non-receptor type 21                       | Ptpn21  | 171070 | 1,60 | down |
| 6165547 | 7309604 | 1646361 | protein tyrosine phosphatase, non-receptor type 21                       | Ptpn21  | 171070 | 1,17 | down |
| 6231589 | 7309604 | 1646362 | protein tyrosine phosphatase, non-receptor type 21                       | Ptpn21  | 171070 | 1,42 | down |
| 6240123 | 7309604 | 1646358 | protein tyrosine phosphatase, non-receptor type 21                       | Ptpn21  | 171070 | 1,19 | down |
| 6256852 | 7309604 | 1646356 | protein tyrosine phosphatase, non-receptor type 21                       | Ptpn21  | 171070 | 1,56 | down |
| 6394417 | 7309604 | 1646371 | protein tyrosine phosphatase, non-receptor type 21                       | Ptpn21  | 171070 | 1,05 | up   |
| 6406889 | 7309604 | 1646365 | protein tyrosine phosphatase, non-receptor type 21                       | Ptpn21  | 171070 | 3,22 | down |
| 6408400 | 7309604 | 1646352 | protein tyrosine phosphatase, non-receptor type 21                       | Ptpn21  | 171070 | 1,53 | up   |
| 6502819 | 7309604 | 1646359 | protein tyrosine phosphatase, non-receptor type 21                       | Ptpn21  | 171070 | 1,90 | down |
| 6574677 | 7309604 | 1646357 | protein tyrosine phosphatase, non-receptor type 21                       | Ptpn21  | 171070 | 1,47 | up   |
| 6660544 | 7309604 | 1646353 | protein tyrosine phosphatase, non-receptor type 21                       | Ptpn21  | 171070 | 1,12 | up   |
| 6669784 | 7309604 | 1646355 | protein tyrosine phosphatase, non-receptor type 21                       | Ptpn21  | 171070 | 3,48 | down |
| 5651955 | 7350181 | 1745386 | protein tyrosine phosphatase, non-receptor type 23                       | Ptpn23  | 117552 | 1,59 | down |
| 5700050 | 7350181 | 1745385 | protein tyrosine phosphatase, non-receptor type 23                       | Ptpn23  | 117552 | 1,17 | down |
| 5773396 | 7350181 | 1745390 | protein tyrosine phosphatase, non-receptor type 23                       | Ptpn23  | 117552 | 1,10 | up   |
| 5792310 | 7350181 | 1745388 | protein tyrosine phosphatase, non-receptor type 23                       | Ptpn23  | 117552 | 1,03 | up   |
| 5803262 | 7350181 | 1745397 | protein tyrosine phosphatase, non-receptor type 23                       | Ptpn23  | 117552 | 1,07 | up   |
| 5985625 | 7350181 | 1745380 | protein tyrosine phosphatase, non-receptor type 23                       | Ptpn23  | 117552 | 1,02 | up   |
| 5990582 | 7350181 | 1745379 | protein tyrosine phosphatase, non-receptor type 23                       | Ptpn23  | 117552 | 1,78 | down |
| 5992898 | 7350181 | 1745384 | protein tyrosine phosphatase, non-receptor type 23                       | Ptpn23  | 117552 | 1,09 | down |
| 6002202 | 7350181 | 1745399 | protein tyrosine phosphatase, non-receptor type 23                       | Ptpn23  | 117552 | 1,05 | down |
| 6013023 | 7350181 | 1745400 | protein tyrosine phosphatase, non-receptor type 23                       | Ptpn23  | 117552 | 1,03 | down |
| 6019798 | 7350181 | 1745387 | protein tyrosine phosphatase, non-receptor type 23                       | Ptpn23  | 117552 | 1,09 | up   |
| 6040071 | 7350181 | 1745398 | protein tyrosine phosphatase, non-receptor type 23                       | Ptpn23  | 117552 | 1,18 | down |
| 6062669 | 7350181 | 1745393 | protein tyrosine phosphatase, non-receptor type 23                       | Ptpn23  | 117552 | 1,02 | down |
| 6064133 | 7350181 | 1745389 | protein tyrosine phosphatase, non-receptor type 23                       | Ptpn23  | 117552 | 1,00 | down |
| 6099508 | 7350181 | 1745396 | protein tyrosine phosphatase, non-receptor type 23                       | Ptpn23  | 117552 | 1,32 | up   |
| 6116435 | 7350181 | 1745381 | protein tyrosine phosphatase, non-receptor type 23                       | Ptpn23  | 117552 | 1,04 | down |
| 6139503 | 7350181 | 1745386 | protein tyrosine phosphatase, non-receptor type 23                       | Ptpn23  | 117552 | 1,43 | down |
| 6140897 | 7350181 | 1745379 | protein tyrosine phosphatase, non-receptor type 23                       | Ptpn23  | 117552 | 1,11 | down |
| 6175916 | 7350181 | 1745391 | protein tyrosine phosphatase, non-receptor type 23                       | Ptpn23  | 117552 | 1,06 | up   |
| 6195223 | 7350181 | 1745383 | protein tyrosine phosphatase, non-receptor type 23                       | Ptpn23  | 117552 | 1,19 | up   |
| 6205096 | 7350181 | 1745386 | protein tyrosine phosphatase, non-receptor type 23                       | Ptpn23  | 117552 | 1,28 | down |
| 6232031 | 7350181 | 1745379 | protein tyrosine phosphatase, non-receptor type 23                       | Ptpn23  | 117552 | 1,06 | down |
| 6253824 | 7350181 | 1745380 | protein tyrosine phosphatase, non-receptor type 23                       | Ptpn23  | 117552 | 1,03 | down |
| 6353582 | 7350181 | 1745379 | protein tyrosine phosphatase, non-receptor type 23                       | Ptpn23  | 117552 | 1,02 | down |
| 6461010 | 7350181 | 1745384 | protein tyrosine phosphatase, non-receptor type 23                       | Ptpn23  | 117552 | 2,43 | down |
| 6545983 | 7350181 | 1745385 | protein tyrosine phosphatase, non-receptor type 23                       | Ptpn23  | 117552 | 1,07 | down |
| 6567855 | 7350181 | 1745386 | protein tyrosine phosphatase, non-receptor type 23                       | Ptpn23  | 117552 | 1,46 | down |

|         |         |         |                                                              |        |        |      |      |
|---------|---------|---------|--------------------------------------------------------------|--------|--------|------|------|
| 6602071 | 7350181 | 1745394 | protein tyrosine phosphatase, non-receptor type 23           | Ptpn23 | 117552 | 1,15 | up   |
| 6624490 | 7350181 | 1745386 | protein tyrosine phosphatase, non-receptor type 23           | Ptpn23 | 117552 | 1,03 | down |
| 6628301 | 7350181 | 1745382 | protein tyrosine phosphatase, non-receptor type 23           | Ptpn23 | 117552 | 1,09 | down |
| 6669234 | 7350181 | 1745392 | protein tyrosine phosphatase, non-receptor type 23           | Ptpn23 | 117552 | 1,26 | up   |
| 6707304 | 7350181 | 1745395 | protein tyrosine phosphatase, non-receptor type 23           | Ptpn23 | 117552 | 1,72 | up   |
| 5630544 | 7051330 | 1012500 | protein tyrosine phosphatase, non-receptor type 5            | Ptpn5  | 29644  | 1,46 | down |
| 5694409 | 7051330 | 1012509 | protein tyrosine phosphatase, non-receptor type 5            | Ptpn5  | 29644  | 1,92 | down |
| 5741284 | 7051330 | 1012498 | protein tyrosine phosphatase, non-receptor type 5            | Ptpn5  | 29644  | 1,01 | down |
| 5751377 | 7051330 | 1012501 | protein tyrosine phosphatase, non-receptor type 5            | Ptpn5  | 29644  | 1,03 | up   |
| 5920610 | 7051330 | 1012505 | protein tyrosine phosphatase, non-receptor type 5            | Ptpn5  | 29644  | 1,24 | up   |
| 5958722 | 7051330 | 1012509 | protein tyrosine phosphatase, non-receptor type 5            | Ptpn5  | 29644  | 1,10 | up   |
| 5982024 | 7051330 | 1012498 | protein tyrosine phosphatase, non-receptor type 5            | Ptpn5  | 29644  | 1,40 | down |
| 6008928 | 7051330 | 1012504 | protein tyrosine phosphatase, non-receptor type 5            | Ptpn5  | 29644  | 1,02 | up   |
| 6183779 | 7051330 | 1012507 | protein tyrosine phosphatase, non-receptor type 5            | Ptpn5  | 29644  | 1,03 | up   |
| 6203777 | 7051330 | 1012503 | protein tyrosine phosphatase, non-receptor type 5            | Ptpn5  | 29644  | 1,85 | up   |
| 6212432 | 7051330 | 1012508 | protein tyrosine phosphatase, non-receptor type 5            | Ptpn5  | 29644  | 1,06 | up   |
| 6276215 | 7051330 | 1012499 | protein tyrosine phosphatase, non-receptor type 5            | Ptpn5  | 29644  | 1,04 | down |
| 6356535 | 7051330 | 1012507 | protein tyrosine phosphatase, non-receptor type 5            | Ptpn5  | 29644  | 1,34 | up   |
| 6387811 | 7051330 | 1012506 | protein tyrosine phosphatase, non-receptor type 5            | Ptpn5  | 29644  | 1,07 | up   |
| 6399923 | 7051330 | 1012509 | protein tyrosine phosphatase, non-receptor type 5            | Ptpn5  | 29644  | 2,01 | down |
| 6549210 | 7051330 | 1012502 | protein tyrosine phosphatase, non-receptor type 5            | Ptpn5  | 29644  | 1,14 | down |
| 6553950 | 7051330 | 1012507 | protein tyrosine phosphatase, non-receptor type 5            | Ptpn5  | 29644  | 1,11 | up   |
| 5661163 | 7037806 | 980222  | protein tyrosine phosphatase, receptor type, E               | Ptpre  | 114767 | 1,11 | up   |
| 5674622 | 7037806 | 980214  | protein tyrosine phosphatase, receptor type, E               | Ptpre  | 114767 | 1,04 | down |
| 5842555 | 7037806 | 980223  | protein tyrosine phosphatase, receptor type, E               | Ptpre  | 114767 | 1,02 | up   |
| 5852889 | 7037806 | 980229  | protein tyrosine phosphatase, receptor type, E               | Ptpre  | 114767 | 1,01 | down |
| 5858750 | 7037806 | 980216  | protein tyrosine phosphatase, receptor type, E               | Ptpre  | 114767 | 1,18 | up   |
| 5944726 | 7037806 | 980232  | protein tyrosine phosphatase, receptor type, E               | Ptpre  | 114767 | 1,26 | down |
| 6015912 | 7037806 | 980224  | protein tyrosine phosphatase, receptor type, E               | Ptpre  | 114767 | 1,12 | down |
| 6044273 | 7037806 | 980231  | protein tyrosine phosphatase, receptor type, E               | Ptpre  | 114767 | 1,71 | up   |
| 6044289 | 7037806 | 980237  | protein tyrosine phosphatase, receptor type, E               | Ptpre  | 114767 | 1,00 | up   |
| 6100758 | 7037806 | 980234  | protein tyrosine phosphatase, receptor type, E               | Ptpre  | 114767 | 1,42 | down |
| 6253778 | 7037806 | 980238  | protein tyrosine phosphatase, receptor type, E               | Ptpre  | 114767 | 1,17 | down |
| 6305794 | 7037806 | 980236  | protein tyrosine phosphatase, receptor type, E               | Ptpre  | 114767 | 1,31 | up   |
| 6318616 | 7037806 | 980218  | protein tyrosine phosphatase, receptor type, E               | Ptpre  | 114767 | 1,27 | up   |
| 6359440 | 7037806 | 980230  | protein tyrosine phosphatase, receptor type, E               | Ptpre  | 114767 | 1,00 | up   |
| 6503651 | 7037806 | 980219  | protein tyrosine phosphatase, receptor type, E               | Ptpre  | 114767 | 1,09 | down |
| 6602381 | 7037806 | 980220  | protein tyrosine phosphatase, receptor type, E               | Ptpre  | 114767 | 1,20 | up   |
| 6612283 | 7037806 | 980233  | protein tyrosine phosphatase, receptor type, E               | Ptpre  | 114767 | 1,17 | up   |
| 6626377 | 7037806 | 980228  | protein tyrosine phosphatase, receptor type, E               | Ptpre  | 114767 | 1,05 | up   |
| 6651124 | 7037806 | 980227  | protein tyrosine phosphatase, receptor type, E               | Ptpre  | 114767 | 1,63 | down |
| 6708692 | 7037806 | 980237  | protein tyrosine phosphatase, receptor type, E               | Ptpre  | 114767 | 1,02 | down |
| 6740006 | 7037806 | 980226  | protein tyrosine phosphatase, receptor type, E               | Ptpre  | 114767 | 1,03 | down |
| 5710744 | 7251655 | 1501651 | protein tyrosine phosphatase, receptor-type, Z polypeptide 1 | Ptprz1 | 25613  | 1,03 | down |
| 5825498 | 7251655 | 1501644 | protein tyrosine phosphatase, receptor-type, Z polypeptide 1 | Ptprz1 | 25613  | 1,13 | up   |
| 5862463 | 7251655 | 1501643 | protein tyrosine phosphatase, receptor-type, Z polypeptide 1 | Ptprz1 | 25613  | 1,08 | up   |
| 5866313 | 7251655 | 1501639 | protein tyrosine phosphatase, receptor-type, Z polypeptide 1 | Ptprz1 | 25613  | 1,04 | up   |
| 5889418 | 7251655 | 1501667 | protein tyrosine phosphatase, receptor-type, Z polypeptide 1 | Ptprz1 | 25613  | 1,79 | down |
| 5962737 | 7251655 | 1501664 | protein tyrosine phosphatase, receptor-type, Z polypeptide 1 | Ptprz1 | 25613  | 1,01 | up   |
| 5968871 | 7251655 | 1501665 | protein tyrosine phosphatase, receptor-type, Z polypeptide 1 | Ptprz1 | 25613  | 1,05 | up   |
| 6001403 | 7251655 | 1501655 | protein tyrosine phosphatase, receptor-type, Z polypeptide 1 | Ptprz1 | 25613  | 1,16 | down |
| 6054958 | 7251655 | 1501659 | protein tyrosine phosphatase, receptor-type, Z polypeptide 1 | Ptprz1 | 25613  | 1,24 | down |
| 6071735 | 7251655 | 1501650 | protein tyrosine phosphatase, receptor-type, Z polypeptide 1 | Ptprz1 | 25613  | 1,36 | down |
| 6091416 | 7251655 | 1501656 | protein tyrosine phosphatase, receptor-type, Z polypeptide 1 | Ptprz1 | 25613  | 1,14 | up   |
| 6095651 | 7251655 | 1501653 | protein tyrosine phosphatase, receptor-type, Z polypeptide 1 | Ptprz1 | 25613  | 1,13 | down |
| 6136750 | 7251655 | 1501657 | protein tyrosine phosphatase, receptor-type, Z polypeptide 1 | Ptprz1 | 25613  | 1,01 | down |

|         |         |         |                                                                              |         |        |      |      |
|---------|---------|---------|------------------------------------------------------------------------------|---------|--------|------|------|
| 6164624 | 7251655 | 1501639 | protein tyrosine phosphatase, receptor-type, Z polypeptide 1                 | Ptprz1  | 25613  | 1,10 | down |
| 6174813 | 7251655 | 1501661 | protein tyrosine phosphatase, receptor-type, Z polypeptide 1                 | Ptprz1  | 25613  | 1,06 | down |
| 6197580 | 7251655 | 1501642 | protein tyrosine phosphatase, receptor-type, Z polypeptide 1                 | Ptprz1  | 25613  | 1,72 | up   |
| 6198472 | 7251655 | 1501641 | protein tyrosine phosphatase, receptor-type, Z polypeptide 1                 | Ptprz1  | 25613  | 1,14 | up   |
| 6227672 | 7251655 | 1501645 | protein tyrosine phosphatase, receptor-type, Z polypeptide 1                 | Ptprz1  | 25613  | 1,10 | down |
| 6253267 | 7251655 | 1501650 | protein tyrosine phosphatase, receptor-type, Z polypeptide 1                 | Ptprz1  | 25613  | 1,83 | up   |
| 6258333 | 7251655 | 1501663 | protein tyrosine phosphatase, receptor-type, Z polypeptide 1                 | Ptprz1  | 25613  | 1,14 | down |
| 6291362 | 7251655 | 1501648 | protein tyrosine phosphatase, receptor-type, Z polypeptide 1                 | Ptprz1  | 25613  | 1,00 | down |
| 6292496 | 7251655 | 1501650 | protein tyrosine phosphatase, receptor-type, Z polypeptide 1                 | Ptprz1  | 25613  | 1,20 | up   |
| 6333466 | 7251655 | 1501647 | protein tyrosine phosphatase, receptor-type, Z polypeptide 1                 | Ptprz1  | 25613  | 1,23 | down |
| 6366523 | 7251655 | 1501650 | protein tyrosine phosphatase, receptor-type, Z polypeptide 1                 | Ptprz1  | 25613  | 1,34 | down |
| 6407116 | 7251655 | 1501649 | protein tyrosine phosphatase, receptor-type, Z polypeptide 1                 | Ptprz1  | 25613  | 2,04 | down |
| 6435613 | 7251655 | 1501651 | protein tyrosine phosphatase, receptor-type, Z polypeptide 1                 | Ptprz1  | 25613  | 1,04 | down |
| 6486248 | 7251655 | 1501658 | protein tyrosine phosphatase, receptor-type, Z polypeptide 1                 | Ptprz1  | 25613  | 1,31 | down |
| 6537571 | 7251655 | 1501666 | protein tyrosine phosphatase, receptor-type, Z polypeptide 1                 | Ptprz1  | 25613  | 1,03 | down |
| 6543284 | 7251655 | 1501669 | protein tyrosine phosphatase, receptor-type, Z polypeptide 1                 | Ptprz1  | 25613  | 1,06 | up   |
| 6557635 | 7251655 | 1501654 | protein tyrosine phosphatase, receptor-type, Z polypeptide 1                 | Ptprz1  | 25613  | 1,12 | down |
| 6576355 | 7251655 | 1501650 | protein tyrosine phosphatase, receptor-type, Z polypeptide 1                 | Ptprz1  | 25613  | 1,20 | down |
| 6629658 | 7251655 | 1501668 | protein tyrosine phosphatase, receptor-type, Z polypeptide 1                 | Ptprz1  | 25613  | 1,05 | down |
| 6641910 | 7251655 | 1501646 | protein tyrosine phosphatase, receptor-type, Z polypeptide 1                 | Ptprz1  | 25613  | 1,30 | down |
| 6670625 | 7251655 | 1501660 | protein tyrosine phosphatase, receptor-type, Z polypeptide 1                 | Ptprz1  | 25613  | 1,15 | down |
| 6683938 | 7251655 | 1501652 | protein tyrosine phosphatase, receptor-type, Z polypeptide 1                 | Ptprz1  | 25613  | 1,00 | up   |
| 6693431 | 7251655 | 1501639 | protein tyrosine phosphatase, receptor-type, Z polypeptide 1                 | Ptprz1  | 25613  | 1,19 | down |
| 6697345 | 7251655 | 1501662 | protein tyrosine phosphatase, receptor-type, Z polypeptide 1                 | Ptprz1  | 25613  | 1,18 | up   |
| 6715960 | 7251655 | 1501640 | protein tyrosine phosphatase, receptor-type, Z polypeptide 1                 | Ptprz1  | 25613  | 1,16 | up   |
| 5962146 | 7288397 | 1592978 | protein tyrosine phosphatase-like A domain containing 2                      | Ptplad2 | 362540 | 1,20 | up   |
| 5985183 | 7288397 | 1592980 | protein tyrosine phosphatase-like A domain containing 2                      | Ptplad2 | 362540 | 1,39 | down |
| 6020341 | 7288397 | 1592984 | protein tyrosine phosphatase-like A domain containing 2                      | Ptplad2 | 362540 | 2,01 | down |
| 6051500 | 7288397 | 1592986 | protein tyrosine phosphatase-like A domain containing 2                      | Ptplad2 | 362540 | 1,08 | up   |
| 6156928 | 7288397 | 1592988 | protein tyrosine phosphatase-like A domain containing 2                      | Ptplad2 | 362540 | 1,04 | up   |
| 6231631 | 7288397 | 1592978 | protein tyrosine phosphatase-like A domain containing 2                      | Ptplad2 | 362540 | 1,48 | down |
| 6243788 | 7288397 | 1592988 | protein tyrosine phosphatase-like A domain containing 2                      | Ptplad2 | 362540 | 1,07 | down |
| 6586379 | 7288397 | 1592982 | protein tyrosine phosphatase-like A domain containing 2                      | Ptplad2 | 362540 | 1,08 | down |
| 6615887 | 7288397 | 1592979 | protein tyrosine phosphatase-like A domain containing 2                      | Ptplad2 | 362540 | 1,02 | up   |
| 5918262 | 7043913 | 995240  | protein-L-isoaspartate (D-aspartate) O-methyltransferase 1                   | Pcmt1   | 25604  | 1,04 | up   |
| 6053585 | 7043913 | 995232  | protein-L-isoaspartate (D-aspartate) O-methyltransferase 1                   | Pcmt1   | 25604  | 2,22 | down |
| 6076175 | 7043913 | 995232  | protein-L-isoaspartate (D-aspartate) O-methyltransferase 1                   | Pcmt1   | 25604  | 1,32 | down |
| 6140311 | 7043913 | 995234  | protein-L-isoaspartate (D-aspartate) O-methyltransferase 1                   | Pcmt1   | 25604  | 1,24 | up   |
| 6207274 | 7043913 | 995232  | protein-L-isoaspartate (D-aspartate) O-methyltransferase 1                   | Pcmt1   | 25604  | 1,23 | down |
| 6276121 | 7043913 | 995235  | protein-L-isoaspartate (D-aspartate) O-methyltransferase 1                   | Pcmt1   | 25604  | 1,04 | down |
| 6348208 | 7043913 | 995236  | protein-L-isoaspartate (D-aspartate) O-methyltransferase 1                   | Pcmt1   | 25604  | 1,27 | up   |
| 6407975 | 7043913 | 995239  | protein-L-isoaspartate (D-aspartate) O-methyltransferase 1                   | Pcmt1   | 25604  | 1,08 | down |
| 6557957 | 7043913 | 995235  | protein-L-isoaspartate (D-aspartate) O-methyltransferase 1                   | Pcmt1   | 25604  | 1,57 | down |
| 6602287 | 7043913 | 995238  | protein-L-isoaspartate (D-aspartate) O-methyltransferase 1                   | Pcmt1   | 25604  | 1,05 | down |
| 6636217 | 7043913 | 995233  | protein-L-isoaspartate (D-aspartate) O-methyltransferase 1                   | Pcmt1   | 25604  | 1,20 | up   |
| 6720351 | 7043913 | 995237  | protein-L-isoaspartate (D-aspartate) O-methyltransferase 1                   | Pcmt1   | 25604  | 1,03 | down |
| 5662073 | 7236492 | 1464576 | protein-L-isoaspartate (D-aspartate) O-methyltransferase domain containing 2 | Pcmt2   | 311726 | 1,28 | up   |
| 5679850 | 7236492 | 1464579 | protein-L-isoaspartate (D-aspartate) O-methyltransferase domain containing 2 | Pcmt2   | 311726 | 1,13 | up   |
| 5821007 | 7236492 | 1464579 | protein-L-isoaspartate (D-aspartate) O-methyltransferase domain containing 2 | Pcmt2   | 311726 | 1,30 | up   |
| 5968126 | 7236492 | 1464579 | protein-L-isoaspartate (D-aspartate) O-methyltransferase domain containing 2 | Pcmt2   | 311726 | 1,24 | down |
| 6184607 | 7236492 | 1464578 | protein-L-isoaspartate (D-aspartate) O-methyltransferase domain containing 2 | Pcmt2   | 311726 | 1,00 | down |
| 6288397 | 7236492 | 1464578 | protein-L-isoaspartate (D-aspartate) O-methyltransferase domain containing 2 | Pcmt2   | 311726 | 1,23 | up   |
| 6339739 | 7236492 | 1464580 | protein-L-isoaspartate (D-aspartate) O-methyltransferase domain containing 2 | Pcmt2   | 311726 | 1,05 | up   |
| 6382987 | 7236492 | 1464575 | protein-L-isoaspartate (D-aspartate) O-methyltransferase domain containing 2 | Pcmt2   | 311726 | 1,08 | up   |
| 6449330 | 7236492 | 1464574 | protein-L-isoaspartate (D-aspartate) O-methyltransferase domain containing 2 | Pcmt2   | 311726 | 1,42 | up   |
| 6459925 | 7236492 | 1464579 | protein-L-isoaspartate (D-aspartate) O-methyltransferase domain containing 2 | Pcmt2   | 311726 | 1,03 | down |

|         |         |         |                                                                                                                                     |         |        |      |      |
|---------|---------|---------|-------------------------------------------------------------------------------------------------------------------------------------|---------|--------|------|------|
| 6651428 | 7236492 | 1464580 | protein-L-isoaspartate (D-aspartate) O-methyltransferase domain containing 2                                                        | Pcmdt2  | 311726 | 1,15 | up   |
| 6734143 | 7236492 | 1464573 | protein-L-isoaspartate (D-aspartate) O-methyltransferase domain containing 2                                                        | Pcmdt2  | 311726 | 1,22 | down |
| 5693290 | 7193644 | 1359708 | protocadherin 10                                                                                                                    | Pcdh10  | 361943 | 1,22 | up   |
| 5815626 | 7193644 | 1359708 | protocadherin 10                                                                                                                    | Pcdh10  | 361943 | 1,26 | down |
| 5917633 | 7193644 | 1359720 | protocadherin 10                                                                                                                    | Pcdh10  | 361943 | 1,09 | up   |
| 5647302 | 7149313 | 1249307 | protocadherin 21                                                                                                                    | Pcdh21  | 93662  | 1,05 | down |
| 5687887 | 7149313 | 1249314 | protocadherin 21                                                                                                                    | Pcdh21  | 93662  | 1,77 | up   |
| 5763544 | 7149313 | 1249317 | protocadherin 21                                                                                                                    | Pcdh21  | 93662  | 1,03 | down |
| 5769363 | 7149313 | 1249319 | protocadherin 21                                                                                                                    | Pcdh21  | 93662  | 1,91 | down |
| 5787410 | 7149313 | 1249318 | protocadherin 21                                                                                                                    | Pcdh21  | 93662  | 1,04 | down |
| 5880359 | 7149313 | 1249305 | protocadherin 21                                                                                                                    | Pcdh21  | 93662  | 1,41 | up   |
| 5898187 | 7149313 | 1249319 | protocadherin 21                                                                                                                    | Pcdh21  | 93662  | 2,15 | down |
| 5921490 | 7149313 | 1249310 | protocadherin 21                                                                                                                    | Pcdh21  | 93662  | 1,07 | down |
| 5974741 | 7149313 | 1249302 | protocadherin 21                                                                                                                    | Pcdh21  | 93662  | 1,08 | up   |
| 6029593 | 7149313 | 1249313 | protocadherin 21                                                                                                                    | Pcdh21  | 93662  | 1,05 | down |
| 6052587 | 7149313 | 1249309 | protocadherin 21                                                                                                                    | Pcdh21  | 93662  | 1,26 | up   |
| 6090485 | 7149313 | 1249304 | protocadherin 21                                                                                                                    | Pcdh21  | 93662  | 1,64 | up   |
| 6116129 | 7149313 | 1249316 | protocadherin 21                                                                                                                    | Pcdh21  | 93662  | 1,12 | up   |
| 6120913 | 7149313 | 1249306 | protocadherin 21                                                                                                                    | Pcdh21  | 93662  | 1,21 | up   |
| 6134935 | 7149313 | 1249315 | protocadherin 21                                                                                                                    | Pcdh21  | 93662  | 1,21 | up   |
| 6360871 | 7149313 | 1249308 | protocadherin 21                                                                                                                    | Pcdh21  | 93662  | 1,45 | up   |
| 6389187 | 7149313 | 1249311 | protocadherin 21                                                                                                                    | Pcdh21  | 93662  | 1,63 | down |
| 6518055 | 7149313 | 1249319 | protocadherin 21                                                                                                                    | Pcdh21  | 93662  | 2,11 | down |
| 6556766 | 7149313 | 1249303 | protocadherin 21                                                                                                                    | Pcdh21  | 93662  | 1,03 | down |
| 6564013 | 7149313 | 1249312 | protocadherin 21                                                                                                                    | Pcdh21  | 93662  | 1,40 | down |
| 6740266 | 7149313 | 1249303 | protocadherin 21                                                                                                                    | Pcdh21  | 93662  | 1,34 | up   |
| 5833404 | 7169492 | 1298252 | protocadherin alpha 1                                                                                                               | Pcdha1  | 393085 | 1,12 | up   |
| 6398399 | 7169492 | 1298252 | protocadherin alpha 1                                                                                                               | Pcdha1  | 393085 | 1,46 | down |
| 6440252 | 7169492 | 1298252 | protocadherin alpha 1                                                                                                               | Pcdha1  | 393085 | 1,16 | down |
| 6451214 | 7169492 | 1298252 | protocadherin alpha 1                                                                                                               | Pcdha1  | 393085 | 1,14 | down |
| 6679515 | 7169492 | 1298252 | protocadherin alpha 1                                                                                                               | Pcdha1  | 393085 | 1,05 | down |
| 6697844 | 7169492 | 1298252 | protocadherin alpha 1                                                                                                               | Pcdha1  | 393085 | 1,57 | down |
| 5673292 | 7169492 | 1298273 | protocadherin alpha 1 /// protocadherin alpha 2 /// protocadherin alpha 3 /// protocadherin alpha 9 /// Pcdha781 /// 393090 /// 116 | Pcdha9  | 393090 | 1,10 | up   |
| 5797950 | 7169492 | 1298272 | protocadherin alpha 1 /// protocadherin alpha 2 /// protocadherin alpha 3 /// protocadherin alpha 9 /// Pcdha781 /// 393090 /// 116 | Pcdha9  | 393090 | 1,15 | up   |
| 6175629 | 7169492 | 1298273 | protocadherin alpha 1 /// protocadherin alpha 2 /// protocadherin alpha 3 /// protocadherin alpha 9 /// Pcdha781 /// 393090 /// 116 | Pcdha9  | 393090 | 1,20 | up   |
| 6228370 | 7169492 | 1298271 | protocadherin alpha 1 /// protocadherin alpha 2 /// protocadherin alpha 3 /// protocadherin alpha 9 /// Pcdha781 /// 393090 /// 116 | Pcdha9  | 393090 | 1,17 | down |
| 6265191 | 7169492 | 1298272 | protocadherin alpha 1 /// protocadherin alpha 2 /// protocadherin alpha 3 /// protocadherin alpha 9 /// Pcdha781 /// 393090 /// 116 | Pcdha9  | 393090 | 1,23 | down |
| 6285755 | 7169492 | 1298273 | protocadherin alpha 1 /// protocadherin alpha 2 /// protocadherin alpha 3 /// protocadherin alpha 9 /// Pcdha781 /// 393090 /// 116 | Pcdha9  | 393090 | 1,77 | down |
| 6538619 | 7169492 | 1298272 | protocadherin alpha 1 /// protocadherin alpha 2 /// protocadherin alpha 3 /// protocadherin alpha 9 /// Pcdha781 /// 393090 /// 116 | Pcdha9  | 393090 | 1,92 | down |
| 6601806 | 7169492 | 1298270 | protocadherin alpha 1 /// protocadherin alpha 2 /// protocadherin alpha 3 /// protocadherin alpha 9 /// Pcdha781 /// 393090 /// 116 | Pcdha9  | 393090 | 1,06 | down |
| 6658449 | 7169492 | 1298272 | protocadherin alpha 1 /// protocadherin alpha 2 /// protocadherin alpha 3 /// protocadherin alpha 9 /// Pcdha781 /// 393090 /// 116 | Pcdha9  | 393090 | 1,19 | up   |
| 6633938 | 7169492 | 1298263 | protocadherin alpha 10                                                                                                              | Pcdha10 | 116778 | 1,13 | up   |
| 6715194 | 7169492 | 1298263 | protocadherin alpha 10                                                                                                              | Pcdha10 | 116778 | 1,32 | up   |
| 5682149 | 7169492 | 1298264 | protocadherin alpha 11                                                                                                              | Pcdha11 | 394223 | 1,10 | up   |
| 6172121 | 7169492 | 1298264 | protocadherin alpha 11                                                                                                              | Pcdha11 | 394223 | 1,21 | up   |
| 6256163 | 7169492 | 1298264 | protocadherin alpha 11                                                                                                              | Pcdha11 | 394223 | 1,00 | up   |
| 6430407 | 7169492 | 1298264 | protocadherin alpha 11                                                                                                              | Pcdha11 | 394223 | 1,04 | down |
| 6075594 | 7169492 | 1298265 | protocadherin alpha 12                                                                                                              | Pcdha12 | 116779 | 1,21 | up   |
| 6219106 | 7169492 | 1298265 | protocadherin alpha 12                                                                                                              | Pcdha12 | 116779 | 1,28 | up   |
| 5654964 | 7169492 | 1298266 | protocadherin alpha 13                                                                                                              | Pcdha13 | 116742 | 1,11 | down |
| 5665507 | 7169492 | 1298266 | protocadherin alpha 13                                                                                                              | Pcdha13 | 116742 | 1,26 | down |
| 5693839 | 7169492 | 1298266 | protocadherin alpha 13                                                                                                              | Pcdha13 | 116742 | 1,14 | up   |
| 6067589 | 7169492 | 1298253 | protocadherin alpha 2                                                                                                               | Pcdha2  | 393086 | 1,44 | down |
| 6507891 | 7169492 | 1298253 | protocadherin alpha 2                                                                                                               | Pcdha2  | 393086 | 1,24 | down |
| 5931859 | 7169492 | 1298254 | protocadherin alpha 3                                                                                                               | Pcdha3  | 116780 | 1,14 | down |
| 6166136 | 7169492 | 1298254 | protocadherin alpha 3                                                                                                               | Pcdha3  | 116780 | 1,18 | down |

|         |         |         |                                                                                                                            |          |        |      |      |
|---------|---------|---------|----------------------------------------------------------------------------------------------------------------------------|----------|--------|------|------|
| 6476381 | 7169492 | 1298254 | protocadherin alpha 3                                                                                                      | Pcdha3   | 116780 | 1,91 | down |
| 5747140 | 7169492 | 1298255 | protocadherin alpha 4                                                                                                      | Pcdha4   | 116741 | 1,63 | up   |
| 5762190 | 7169492 | 1298255 | protocadherin alpha 4                                                                                                      | Pcdha4   | 116741 | 1,18 | down |
| 5776680 | 7169492 | 1298255 | protocadherin alpha 4                                                                                                      | Pcdha4   | 116741 | 1,74 | up   |
| 5815156 | 7169492 | 1298255 | protocadherin alpha 4                                                                                                      | Pcdha4   | 116741 | 1,98 | up   |
| 5700625 | 7169492 | 1298256 | protocadherin alpha 5                                                                                                      | Pcdha5   | 393087 | 2,29 | up   |
| 6164498 | 7169492 | 1298257 | protocadherin alpha 5                                                                                                      | Pcdha5   | 393087 | 1,80 | up   |
| 6348679 | 7169492 | 1298257 | protocadherin alpha 5                                                                                                      | Pcdha5   | 393087 | 1,12 | up   |
| 6399727 | 7169492 | 1298257 | protocadherin alpha 5                                                                                                      | Pcdha5   | 393087 | 1,17 | down |
| 6718759 | 7169492 | 1298256 | protocadherin alpha 5                                                                                                      | Pcdha5   | 393087 | 1,12 | up   |
| 5772872 | 7169492 | 1298258 | protocadherin alpha 6                                                                                                      | Pcdha6   | 393088 | 1,86 | up   |
| 5820748 | 7169492 | 1298258 | protocadherin alpha 6                                                                                                      | Pcdha6   | 393088 | 1,10 | up   |
| 5848367 | 7169492 | 1298258 | protocadherin alpha 6                                                                                                      | Pcdha6   | 393088 | 1,01 | up   |
| 5919967 | 7169492 | 1298258 | protocadherin alpha 6                                                                                                      | Pcdha6   | 393088 | 1,37 | up   |
| 6029361 | 7169492 | 1298258 | protocadherin alpha 6                                                                                                      | Pcdha6   | 393088 | 1,18 | down |
| 6092420 | 7169492 | 1298258 | protocadherin alpha 6                                                                                                      | Pcdha6   | 393088 | 1,43 | up   |
| 6462245 | 7169492 | 1298258 | protocadherin alpha 6                                                                                                      | Pcdha6   | 393088 | 1,28 | down |
| 6725996 | 7169492 | 1298258 | protocadherin alpha 6                                                                                                      | Pcdha6   | 393088 | 1,36 | up   |
| 6024146 | 7169492 | 1298259 | protocadherin alpha 7                                                                                                      | Pcdha7   | 393089 | 1,50 | down |
| 6061677 | 7169492 | 1298259 | protocadherin alpha 7                                                                                                      | Pcdha7   | 393089 | 1,06 | down |
| 6201763 | 7169492 | 1298259 | protocadherin alpha 7                                                                                                      | Pcdha7   | 393089 | 1,28 | up   |
| 6588651 | 7169492 | 1298259 | protocadherin alpha 7                                                                                                      | Pcdha7   | 393089 | 1,01 | up   |
| 6646388 | 7169492 | 1298259 | protocadherin alpha 7                                                                                                      | Pcdha7   | 393089 | 1,29 | up   |
| 6049835 | 7169492 | 1298260 | protocadherin alpha 8                                                                                                      | Pcdha8   | 116781 | 1,12 | up   |
| 6280889 | 7169492 | 1298261 | protocadherin alpha 8                                                                                                      | Pcdha8   | 116781 | 1,01 | down |
| 6561728 | 7169492 | 1298261 | protocadherin alpha 8                                                                                                      | Pcdha8   | 116781 | 1,36 | down |
| 5991182 | 7169492 | 1298262 | protocadherin alpha 9                                                                                                      | Pcdha9   | 393090 | 1,25 | up   |
| 6102506 | 7169492 | 1298262 | protocadherin alpha 9                                                                                                      | Pcdha9   | 393090 | 1,02 | down |
| 6210323 | 7169492 | 1298262 | protocadherin alpha 9                                                                                                      | Pcdha9   | 393090 | 1,72 | down |
| 6236285 | 7169492 | 1298267 | protocadherin alpha subfamily C, 1                                                                                         | Pcdhac1  | 393091 | 1,33 | down |
| 6315484 | 7169492 | 1298267 | protocadherin alpha subfamily C, 1                                                                                         | Pcdhac1  | 393091 | 1,02 | down |
| 5758008 | 7169492 | 1298269 | protocadherin alpha subfamily C, 2                                                                                         | Pcdhac2  | 393092 | 1,43 | down |
| 5758523 | 7169492 | 1298269 | protocadherin alpha subfamily C, 2                                                                                         | Pcdhac2  | 393092 | 1,23 | down |
| 6006123 | 7169492 | 1298268 | protocadherin alpha subfamily C, 2                                                                                         | Pcdhac2  | 393092 | 1,16 | down |
| 6080222 | 7169492 | 1298269 | protocadherin alpha subfamily C, 2                                                                                         | Pcdhac2  | 393092 | 1,14 | down |
| 6525246 | 7169573 | 1298391 | protocadherin beta 18                                                                                                      | Pcdhb18  | 548105 | 1,28 | up   |
| 6712051 | 7169573 | 1298391 | protocadherin beta 18                                                                                                      | Pcdhb18  | 548105 | 1,09 | down |
| 6228393 | 7169599 | 1298440 | protocadherin gamma subfamily A, 1                                                                                         | Pcdhga1  | 553129 | 1,02 | up   |
| 6530199 | 7169599 | 1298440 | protocadherin gamma subfamily A, 1                                                                                         | Pcdhga1  | 553129 | 1,37 | down |
| 6540062 | 7169599 | 1298440 | protocadherin gamma subfamily A, 1                                                                                         | Pcdhga1  | 553129 | 1,06 | down |
| 6082000 | 7169599 | 1298463 | protocadherin gamma subfamily A, 1 /// protocadherin gamma subfamily A, 10 /// rga3 /// Pcdhga5 /// B47 /// 291637 /// 291 | Pcdhga5  | 291637 | 1,61 | down |
| 6195972 | 7169599 | 1298464 | protocadherin gamma subfamily A, 1 /// protocadherin gamma subfamily A, 10 /// rga3 /// Pcdhga5 /// B47 /// 291637 /// 291 | Pcdhga5  | 291637 | 1,41 | down |
| 6272682 | 7169599 | 1298465 | protocadherin gamma subfamily A, 1 /// protocadherin gamma subfamily A, 10 /// rga3 /// Pcdhga5 /// B47 /// 291637 /// 291 | Pcdhga5  | 291637 | 1,75 | down |
| 6391635 | 7169599 | 1298463 | protocadherin gamma subfamily A, 1 /// protocadherin gamma subfamily A, 10 /// rga3 /// Pcdhga5 /// B47 /// 291637 /// 291 | Pcdhga5  | 291637 | 1,02 | down |
| 6119457 | 7169599 | 1298454 | protocadherin gamma subfamily A, 10                                                                                        | Pcdhga10 | 498849 | 1,34 | up   |
| 6340336 | 7169599 | 1298454 | protocadherin gamma subfamily A, 10                                                                                        | Pcdhga10 | 498849 | 1,03 | down |
| 6683569 | 7169599 | 1298454 | protocadherin gamma subfamily A, 10                                                                                        | Pcdhga10 | 498849 | 1,17 | down |
| 5710827 | 7169599 | 1298456 | protocadherin gamma subfamily A, 11                                                                                        | Pcdhga11 | 252897 | 1,06 | down |
| 5970141 | 7169599 | 1298457 | protocadherin gamma subfamily A, 11                                                                                        | Pcdhga11 | 252897 | 1,01 | up   |
| 5797431 | 7169599 | 1298461 | protocadherin gamma subfamily A, 12                                                                                        | Pcdhga12 | 498850 | 1,09 | up   |
| 6127122 | 7169599 | 1298461 | protocadherin gamma subfamily A, 12                                                                                        | Pcdhga12 | 498850 | 1,30 | up   |
| 6265756 | 7169599 | 1298460 | protocadherin gamma subfamily A, 12                                                                                        | Pcdhga12 | 498850 | 1,21 | up   |
| 5907387 | 7169599 | 1298441 | protocadherin gamma subfamily A, 2                                                                                         | Pcdhga2  | 498846 | 1,92 | up   |
| 5966018 | 7169599 | 1298441 | protocadherin gamma subfamily A, 2                                                                                         | Pcdhga2  | 498846 | 1,20 | up   |
| 6306683 | 7169599 | 1298441 | protocadherin gamma subfamily A, 2                                                                                         | Pcdhga2  | 498846 | 1,03 | up   |
| 6516555 | 7169599 | 1298441 | protocadherin gamma subfamily A, 2                                                                                         | Pcdhga2  | 498846 | 1,09 | down |

|         |         |         |                                                             |         |        |      |      |
|---------|---------|---------|-------------------------------------------------------------|---------|--------|------|------|
| 6718602 | 7169599 | 1298441 | protocadherin gamma subfamily A, 2                          | Pcdhga2 | 498846 | 1,25 | up   |
| 5868919 | 7169599 | 1298442 | protocadherin gamma subfamily A, 3                          | Pcdhga3 | 498847 | 1,19 | down |
| 5942024 | 7169599 | 1298442 | protocadherin gamma subfamily A, 3                          | Pcdhga3 | 498847 | 1,74 | up   |
| 6572348 | 7169599 | 1298442 | protocadherin gamma subfamily A, 3                          | Pcdhga3 | 498847 | 1,12 | down |
| 6735136 | 7169599 | 1298442 | protocadherin gamma subfamily A, 3                          | Pcdhga3 | 498847 | 1,07 | up   |
| 6346073 | 7169599 | 1298445 | protocadherin gamma subfamily A, 5                          | Pcdhga5 | 291637 | 1,03 | up   |
| 6349093 | 7169599 | 1298445 | protocadherin gamma subfamily A, 5                          | Pcdhga5 | 291637 | 1,14 | down |
| 6006894 | 7169599 | 1298448 | protocadherin gamma subfamily A, 7                          | Pcdhga7 | 291635 | 1,58 | down |
| 6035182 | 7169599 | 1298447 | protocadherin gamma subfamily A, 7                          | Pcdhga7 | 291635 | 1,09 | down |
| 6628982 | 7169599 | 1298448 | protocadherin gamma subfamily A, 7                          | Pcdhga7 | 291635 | 1,07 | up   |
| 6614314 | 7169599 | 1298450 | protocadherin gamma subfamily A, 8                          | Pcdhga8 | 364843 | 1,23 | down |
| 5698140 | 7169599 | 1298452 | protocadherin gamma subfamily A, 9                          | Pcdhga9 | 252895 | 1,09 | up   |
| 5831038 | 7169599 | 1298452 | protocadherin gamma subfamily A, 9                          | Pcdhga9 | 252895 | 1,12 | down |
| 6171922 | 7169599 | 1298452 | protocadherin gamma subfamily A, 9                          | Pcdhga9 | 252895 | 1,08 | up   |
| 6193999 | 7169599 | 1298452 | protocadherin gamma subfamily A, 9                          | Pcdhga9 | 252895 | 1,15 | down |
| 6314445 | 7169599 | 1298452 | protocadherin gamma subfamily A, 9                          | Pcdhga9 | 252895 | 6,59 | down |
| 6491386 | 7169599 | 1298452 | protocadherin gamma subfamily A, 9                          | Pcdhga9 | 252895 | 1,20 | down |
| 6541847 | 7169599 | 1298452 | protocadherin gamma subfamily A, 9                          | Pcdhga9 | 252895 | 1,26 | down |
| 6024109 | 7169599 | 1298455 | protocadherin gamma subfamily B, 7                          | Pcdhgb7 | 364844 | 1,37 | up   |
| 6324815 | 7169599 | 1298455 | protocadherin gamma subfamily B, 7                          | Pcdhgb7 | 364844 | 1,11 | up   |
| 6362355 | 7169599 | 1298455 | protocadherin gamma subfamily B, 7                          | Pcdhgb7 | 364844 | 1,09 | up   |
| 6478600 | 7169599 | 1298455 | protocadherin gamma subfamily B, 7                          | Pcdhgb7 | 364844 | 1,29 | up   |
| 5660972 | 7169599 | 1298458 | protocadherin gamma subfamily B, 8                          | Pcdhgb8 | 364845 | 1,50 | up   |
| 5878478 | 7169599 | 1298459 | protocadherin gamma subfamily B, 8                          | Pcdhgb8 | 364845 | 1,25 | up   |
| 6223229 | 7169599 | 1298458 | protocadherin gamma subfamily B, 8                          | Pcdhgb8 | 364845 | 1,36 | up   |
| 6384280 | 7169599 | 1298459 | protocadherin gamma subfamily B, 8                          | Pcdhgb8 | 364845 | 1,12 | down |
| 6574233 | 7169599 | 1298462 | protocadherin gamma subfamily C, 3                          | Pcdhgc3 | 116782 | 1,30 | down |
| 5633111 | 7047524 | 1004658 | PRP31 pre-mRNA processing factor 31 homolog (S. cerevisiae) | Prpf31  | 292536 | 1,22 | down |
| 5710548 | 7047524 | 1004662 | PRP31 pre-mRNA processing factor 31 homolog (S. cerevisiae) | Prpf31  | 292536 | 1,23 | up   |
| 5806986 | 7047524 | 1004657 | PRP31 pre-mRNA processing factor 31 homolog (S. cerevisiae) | Prpf31  | 292536 | 1,27 | up   |
| 5841908 | 7047524 | 1004660 | PRP31 pre-mRNA processing factor 31 homolog (S. cerevisiae) | Prpf31  | 292536 | 1,24 | up   |
| 6020680 | 7047524 | 1004664 | PRP31 pre-mRNA processing factor 31 homolog (S. cerevisiae) | Prpf31  | 292536 | 1,17 | down |
| 6175785 | 7047524 | 1004663 | PRP31 pre-mRNA processing factor 31 homolog (S. cerevisiae) | Prpf31  | 292536 | 1,22 | up   |
| 6186156 | 7047524 | 1004653 | PRP31 pre-mRNA processing factor 31 homolog (S. cerevisiae) | Prpf31  | 292536 | 1,09 | down |
| 6224391 | 7047524 | 1004654 | PRP31 pre-mRNA processing factor 31 homolog (S. cerevisiae) | Prpf31  | 292536 | 1,24 | down |
| 6340553 | 7047524 | 1004654 | PRP31 pre-mRNA processing factor 31 homolog (S. cerevisiae) | Prpf31  | 292536 | 1,45 | up   |
| 6414855 | 7047524 | 1004661 | PRP31 pre-mRNA processing factor 31 homolog (S. cerevisiae) | Prpf31  | 292536 | 1,39 | down |
| 6461196 | 7047524 | 1004655 | PRP31 pre-mRNA processing factor 31 homolog (S. cerevisiae) | Prpf31  | 292536 | 1,05 | up   |
| 6473248 | 7047524 | 1004656 | PRP31 pre-mRNA processing factor 31 homolog (S. cerevisiae) | Prpf31  | 292536 | 1,61 | up   |
| 6584266 | 7047524 | 1004654 | PRP31 pre-mRNA processing factor 31 homolog (S. cerevisiae) | Prpf31  | 292536 | 2,96 | up   |
| 6589047 | 7047524 | 1004656 | PRP31 pre-mRNA processing factor 31 homolog (S. cerevisiae) | Prpf31  | 292536 | 1,10 | up   |
| 6611695 | 7047524 | 1004659 | PRP31 pre-mRNA processing factor 31 homolog (S. cerevisiae) | Prpf31  | 292536 | 1,30 | up   |
| 6697098 | 7047524 | 1004655 | PRP31 pre-mRNA processing factor 31 homolog (S. cerevisiae) | Prpf31  | 292536 | 1,10 | down |
| 6706712 | 7047524 | 1004666 | PRP31 pre-mRNA processing factor 31 homolog (S. cerevisiae) | Prpf31  | 292536 | 1,97 | down |
| 5676740 | 7298692 | 1618404 | PRP39 pre-mRNA processing factor 39 homolog (S. cerevisiae) | Prpf39  | 314171 | 1,07 | down |
| 5695300 | 7298692 | 1618413 | PRP39 pre-mRNA processing factor 39 homolog (S. cerevisiae) | Prpf39  | 314171 | 2,61 | down |
| 5717379 | 7298692 | 1618403 | PRP39 pre-mRNA processing factor 39 homolog (S. cerevisiae) | Prpf39  | 314171 | 1,06 | down |
| 5723566 | 7298692 | 1618403 | PRP39 pre-mRNA processing factor 39 homolog (S. cerevisiae) | Prpf39  | 314171 | 1,01 | down |
| 5723939 | 7298692 | 1618403 | PRP39 pre-mRNA processing factor 39 homolog (S. cerevisiae) | Prpf39  | 314171 | 1,16 | down |
| 5789577 | 7298692 | 1618409 | PRP39 pre-mRNA processing factor 39 homolog (S. cerevisiae) | Prpf39  | 314171 | 1,12 | up   |
| 5827025 | 7298692 | 1618403 | PRP39 pre-mRNA processing factor 39 homolog (S. cerevisiae) | Prpf39  | 314171 | 1,19 | up   |
| 5861110 | 7298692 | 1618403 | PRP39 pre-mRNA processing factor 39 homolog (S. cerevisiae) | Prpf39  | 314171 | 1,19 | up   |
| 5930292 | 7298692 | 1618413 | PRP39 pre-mRNA processing factor 39 homolog (S. cerevisiae) | Prpf39  | 314171 | 1,29 | up   |
| 5948325 | 7298692 | 1618410 | PRP39 pre-mRNA processing factor 39 homolog (S. cerevisiae) | Prpf39  | 314171 | 1,06 | down |
| 5963326 | 7298692 | 1618403 | PRP39 pre-mRNA processing factor 39 homolog (S. cerevisiae) | Prpf39  | 314171 | 1,29 | down |
| 5979467 | 7298692 | 1618403 | PRP39 pre-mRNA processing factor 39 homolog (S. cerevisiae) | Prpf39  | 314171 | 1,28 | up   |

|         |         |         |                                                             |        |        |      |      |
|---------|---------|---------|-------------------------------------------------------------|--------|--------|------|------|
| 6184157 | 7298692 | 1618403 | PRP39 pre-mRNA processing factor 39 homolog (S. cerevisiae) | Prpf39 | 314171 | 1,22 | up   |
| 6252896 | 7298692 | 1618402 | PRP39 pre-mRNA processing factor 39 homolog (S. cerevisiae) | Prpf39 | 314171 | 1,08 | up   |
| 6260256 | 7298692 | 1618408 | PRP39 pre-mRNA processing factor 39 homolog (S. cerevisiae) | Prpf39 | 314171 | 1,25 | up   |
| 6262779 | 7298692 | 1618412 | PRP39 pre-mRNA processing factor 39 homolog (S. cerevisiae) | Prpf39 | 314171 | 1,38 | down |
| 6323318 | 7298692 | 1618402 | PRP39 pre-mRNA processing factor 39 homolog (S. cerevisiae) | Prpf39 | 314171 | 1,26 | down |
| 6328285 | 7298692 | 1618409 | PRP39 pre-mRNA processing factor 39 homolog (S. cerevisiae) | Prpf39 | 314171 | 1,20 | up   |
| 6348391 | 7298692 | 1618401 | PRP39 pre-mRNA processing factor 39 homolog (S. cerevisiae) | Prpf39 | 314171 | 1,25 | up   |
| 6350864 | 7298692 | 1618409 | PRP39 pre-mRNA processing factor 39 homolog (S. cerevisiae) | Prpf39 | 314171 | 1,21 | down |
| 6355360 | 7298692 | 1618403 | PRP39 pre-mRNA processing factor 39 homolog (S. cerevisiae) | Prpf39 | 314171 | 1,42 | up   |
| 6417194 | 7298692 | 1618403 | PRP39 pre-mRNA processing factor 39 homolog (S. cerevisiae) | Prpf39 | 314171 | 1,23 | down |
| 6666722 | 7298692 | 1618403 | PRP39 pre-mRNA processing factor 39 homolog (S. cerevisiae) | Prpf39 | 314171 | 1,19 | up   |
| 6699583 | 7298692 | 1618407 | PRP39 pre-mRNA processing factor 39 homolog (S. cerevisiae) | Prpf39 | 314171 | 1,01 | up   |
| 6733266 | 7298692 | 1618411 | PRP39 pre-mRNA processing factor 39 homolog (S. cerevisiae) | Prpf39 | 314171 | 1,17 | down |
| 6733924 | 7298692 | 1618413 | PRP39 pre-mRNA processing factor 39 homolog (S. cerevisiae) | Prpf39 | 314171 | 1,34 | down |
| 5767746 | 7099273 | 1125961 | pseudouridylate synthase 1                                  | Pus1   | 304567 | 1,21 | down |
| 5829759 | 7099273 | 1125960 | pseudouridylate synthase 1                                  | Pus1   | 304567 | 1,62 | up   |
| 5897516 | 7099273 | 1125956 | pseudouridylate synthase 1                                  | Pus1   | 304567 | 1,06 | down |
| 5937510 | 7099273 | 1125957 | pseudouridylate synthase 1                                  | Pus1   | 304567 | 1,65 | up   |
| 6042431 | 7099273 | 1125959 | pseudouridylate synthase 1                                  | Pus1   | 304567 | 1,45 | down |
| 6697741 | 7099273 | 1125955 | pseudouridylate synthase 1                                  | Pus1   | 304567 | 2,36 | down |
| 5669241 | 7127975 | 1196255 | purine rich element binding protein B                       | Purb   | 498407 | 1,09 | down |
| 5701100 | 7127975 | 1196254 | purine rich element binding protein B                       | Purb   | 498407 | 1,18 | down |
| 5771862 | 7127975 | 1196254 | purine rich element binding protein B                       | Purb   | 498407 | 1,20 | down |
| 5807142 | 7127975 | 1196253 | purine rich element binding protein B                       | Purb   | 498407 | 1,07 | down |
| 5873371 | 7127975 | 1196253 | purine rich element binding protein B                       | Purb   | 498407 | 1,06 | up   |
| 5923405 | 7127975 | 1196254 | purine rich element binding protein B                       | Purb   | 498407 | 1,08 | down |
| 5962455 | 7127975 | 1196253 | purine rich element binding protein B                       | Purb   | 498407 | 1,13 | down |
| 6067747 | 7127975 | 1196254 | purine rich element binding protein B                       | Purb   | 498407 | 1,20 | down |
| 6133585 | 7127975 | 1196254 | purine rich element binding protein B                       | Purb   | 498407 | 1,04 | up   |
| 6133776 | 7127975 | 1196254 | purine rich element binding protein B                       | Purb   | 498407 | 1,12 | up   |
| 6463601 | 7127975 | 1196254 | purine rich element binding protein B                       | Purb   | 498407 | 1,04 | up   |
| 6600305 | 7127975 | 1196254 | purine rich element binding protein B                       | Purb   | 498407 | 2,45 | down |
| 5652487 | 7095396 | 1115929 | purinergic receptor P2X, ligand-gated ion channel, 6        | P2rx6  | 25041  | 1,45 | down |
| 5675108 | 7095396 | 1115924 | purinergic receptor P2X, ligand-gated ion channel, 6        | P2rx6  | 25041  | 2,27 | down |
| 5692283 | 7095396 | 1115919 | purinergic receptor P2X, ligand-gated ion channel, 6        | P2rx6  | 25041  | 1,25 | up   |
| 5729991 | 7095396 | 1115921 | purinergic receptor P2X, ligand-gated ion channel, 6        | P2rx6  | 25041  | 1,63 | down |
| 5803187 | 7095396 | 1115930 | purinergic receptor P2X, ligand-gated ion channel, 6        | P2rx6  | 25041  | 1,86 | down |
| 5826256 | 7095396 | 1115926 | purinergic receptor P2X, ligand-gated ion channel, 6        | P2rx6  | 25041  | 1,31 | up   |
| 5975827 | 7095396 | 1115918 | purinergic receptor P2X, ligand-gated ion channel, 6        | P2rx6  | 25041  | 1,05 | down |
| 6189460 | 7095396 | 1115928 | purinergic receptor P2X, ligand-gated ion channel, 6        | P2rx6  | 25041  | 1,05 | up   |
| 6210219 | 7095396 | 1115918 | purinergic receptor P2X, ligand-gated ion channel, 6        | P2rx6  | 25041  | 1,02 | up   |
| 6293769 | 7095396 | 1115925 | purinergic receptor P2X, ligand-gated ion channel, 6        | P2rx6  | 25041  | 1,21 | down |
| 6362715 | 7095396 | 1115923 | purinergic receptor P2X, ligand-gated ion channel, 6        | P2rx6  | 25041  | 1,12 | up   |
| 6459437 | 7095396 | 1115922 | purinergic receptor P2X, ligand-gated ion channel, 6        | P2rx6  | 25041  | 1,09 | up   |
| 6486497 | 7095396 | 1115918 | purinergic receptor P2X, ligand-gated ion channel, 6        | P2rx6  | 25041  | 1,35 | down |
| 6557121 | 7095396 | 1115920 | purinergic receptor P2X, ligand-gated ion channel, 6        | P2rx6  | 25041  | 1,39 | down |
| 6695797 | 7095396 | 1115927 | purinergic receptor P2X, ligand-gated ion channel, 6        | P2rx6  | 25041  | 1,73 | up   |
| 6736083 | 7095396 | 1115930 | purinergic receptor P2X, ligand-gated ion channel, 6        | P2rx6  | 25041  | 1,16 | up   |
| 5925249 | 7113984 | 1162222 | Purkinje cell protein 4-like 1                              | Pcp4l1 | 685448 | 1,26 | up   |
| 6356182 | 7113984 | 1162223 | Purkinje cell protein 4-like 1                              | Pcp4l1 | 685448 | 1,03 | down |
| 6731371 | 7113984 | 1162222 | Purkinje cell protein 4-like 1                              | Pcp4l1 | 685448 | 2,82 | down |
| 5641722 | 7249917 | 1497401 | putative homeodomain transcription factor 2                 | Phtf2  | 296762 | 1,07 | down |
| 5645741 | 7249917 | 1497399 | putative homeodomain transcription factor 2                 | Phtf2  | 296762 | 1,22 | down |
| 5848003 | 7249917 | 1497380 | putative homeodomain transcription factor 2                 | Phtf2  | 296762 | 1,53 | down |
| 5924528 | 7249917 | 1497404 | putative homeodomain transcription factor 2                 | Phtf2  | 296762 | 1,04 | up   |
| 6161677 | 7249917 | 1497396 | putative homeodomain transcription factor 2                 | Phtf2  | 296762 | 1,08 | down |

|         |         |         |                                                       |       |        |      |      |
|---------|---------|---------|-------------------------------------------------------|-------|--------|------|------|
| 6166213 | 7249917 | 1497398 | putative homeodomain transcription factor 2           | Phtf2 | 296762 | 1,33 | up   |
| 6183048 | 7249917 | 1497405 | putative homeodomain transcription factor 2           | Phtf2 | 296762 | 1,01 | down |
| 6198403 | 7249917 | 1497378 | putative homeodomain transcription factor 2           | Phtf2 | 296762 | 1,40 | up   |
| 6229424 | 7249917 | 1497388 | putative homeodomain transcription factor 2           | Phtf2 | 296762 | 1,29 | down |
| 6295507 | 7249917 | 1497387 | putative homeodomain transcription factor 2           | Phtf2 | 296762 | 1,04 | down |
| 6343194 | 7249917 | 1497388 | putative homeodomain transcription factor 2           | Phtf2 | 296762 | 1,49 | up   |
| 6373262 | 7249917 | 1497393 | putative homeodomain transcription factor 2           | Phtf2 | 296762 | 1,40 | down |
| 6396360 | 7249917 | 1497384 | putative homeodomain transcription factor 2           | Phtf2 | 296762 | 2,35 | up   |
| 6420039 | 7249917 | 1497388 | putative homeodomain transcription factor 2           | Phtf2 | 296762 | 1,11 | up   |
| 6442798 | 7249917 | 1497386 | putative homeodomain transcription factor 2           | Phtf2 | 296762 | 1,09 | down |
| 6458471 | 7249917 | 1497393 | putative homeodomain transcription factor 2           | Phtf2 | 296762 | 1,01 | down |
| 6515684 | 7249917 | 1497402 | putative homeodomain transcription factor 2           | Phtf2 | 296762 | 1,17 | down |
| 6560374 | 7249917 | 1497389 | putative homeodomain transcription factor 2           | Phtf2 | 296762 | 1,26 | down |
| 6646510 | 7249917 | 1497390 | putative homeodomain transcription factor 2           | Phtf2 | 296762 | 1,21 | up   |
| 6679655 | 7249917 | 1497400 | putative homeodomain transcription factor 2           | Phtf2 | 296762 | 1,34 | down |
| 6687621 | 7249917 | 1497405 | putative homeodomain transcription factor 2           | Phtf2 | 296762 | 1,05 | up   |
| 6707389 | 7249917 | 1497403 | putative homeodomain transcription factor 2           | Phtf2 | 296762 | 1,03 | down |
| 6723614 | 7249917 | 1497405 | putative homeodomain transcription factor 2           | Phtf2 | 296762 | 1,52 | down |
| 5668346 | 7337260 | 1712782 | putative neuronal cell adhesion molecule              | Punc  | 315759 | 1,01 | down |
| 5714531 | 7381993 | 1825223 | pyruvate dehydrogenase kinase, isozyme 3              | Pdk3  | 296849 | 1,46 | down |
| 5903965 | 7381993 | 1825226 | pyruvate dehydrogenase kinase, isozyme 3              | Pdk3  | 296849 | 1,01 | up   |
| 6099050 | 7381993 | 1825220 | pyruvate dehydrogenase kinase, isozyme 3              | Pdk3  | 296849 | 1,37 | down |
| 6166014 | 7381993 | 1825216 | pyruvate dehydrogenase kinase, isozyme 3              | Pdk3  | 296849 | 1,33 | down |
| 6193895 | 7381993 | 1825229 | pyruvate dehydrogenase kinase, isozyme 3              | Pdk3  | 296849 | 1,04 | down |
| 6195945 | 7381993 | 1825221 | pyruvate dehydrogenase kinase, isozyme 3              | Pdk3  | 296849 | 1,25 | up   |
| 6344222 | 7381993 | 1825233 | pyruvate dehydrogenase kinase, isozyme 3              | Pdk3  | 296849 | 1,26 | up   |
| 6381716 | 7381993 | 1825227 | pyruvate dehydrogenase kinase, isozyme 3              | Pdk3  | 296849 | 1,30 | down |
| 6537727 | 7381993 | 1825219 | pyruvate dehydrogenase kinase, isozyme 3              | Pdk3  | 296849 | 1,11 | down |
| 6568878 | 7381993 | 1825225 | pyruvate dehydrogenase kinase, isozyme 3              | Pdk3  | 296849 | 1,54 | down |
| 6618898 | 7381993 | 1825233 | pyruvate dehydrogenase kinase, isozyme 3              | Pdk3  | 296849 | 1,22 | down |
| 6677084 | 7381993 | 1825222 | pyruvate dehydrogenase kinase, isozyme 3              | Pdk3  | 296849 | 1,36 | down |
| 6693717 | 7381993 | 1825228 | pyruvate dehydrogenase kinase, isozyme 3              | Pdk3  | 296849 | 1,42 | up   |
| 5724428 | 7181086 | 1327923 | pyruvate dehydrogenase phosphatase regulatory subunit | Pdpr  | 307852 | 1,13 | up   |
| 5868478 | 7181086 | 1327917 | pyruvate dehydrogenase phosphatase regulatory subunit | Pdpr  | 307852 | 1,23 | up   |
| 5874995 | 7181086 | 1327918 | pyruvate dehydrogenase phosphatase regulatory subunit | Pdpr  | 307852 | 1,04 | up   |
| 5878411 | 7181086 | 1327914 | pyruvate dehydrogenase phosphatase regulatory subunit | Pdpr  | 307852 | 1,10 | up   |
| 5939700 | 7181086 | 1327907 | pyruvate dehydrogenase phosphatase regulatory subunit | Pdpr  | 307852 | 2,05 | down |
| 5943235 | 7181086 | 1327921 | pyruvate dehydrogenase phosphatase regulatory subunit | Pdpr  | 307852 | 1,21 | down |
| 5970640 | 7181086 | 1327919 | pyruvate dehydrogenase phosphatase regulatory subunit | Pdpr  | 307852 | 1,12 | up   |
| 6028714 | 7181086 | 1327917 | pyruvate dehydrogenase phosphatase regulatory subunit | Pdpr  | 307852 | 1,18 | down |
| 6128780 | 7181086 | 1327925 | pyruvate dehydrogenase phosphatase regulatory subunit | Pdpr  | 307852 | 1,19 | up   |
| 6158298 | 7181086 | 1327922 | pyruvate dehydrogenase phosphatase regulatory subunit | Pdpr  | 307852 | 1,25 | up   |
| 6202353 | 7181086 | 1327920 | pyruvate dehydrogenase phosphatase regulatory subunit | Pdpr  | 307852 | 1,26 | down |
| 6207547 | 7181086 | 1327912 | pyruvate dehydrogenase phosphatase regulatory subunit | Pdpr  | 307852 | 1,22 | down |
| 6262176 | 7181086 | 1327927 | pyruvate dehydrogenase phosphatase regulatory subunit | Pdpr  | 307852 | 1,07 | up   |
| 6281850 | 7181086 | 1327915 | pyruvate dehydrogenase phosphatase regulatory subunit | Pdpr  | 307852 | 1,21 | up   |
| 6321505 | 7181086 | 1327911 | pyruvate dehydrogenase phosphatase regulatory subunit | Pdpr  | 307852 | 1,16 | down |
| 6521920 | 7181086 | 1327909 | pyruvate dehydrogenase phosphatase regulatory subunit | Pdpr  | 307852 | 1,11 | up   |
| 6573509 | 7181086 | 1327907 | pyruvate dehydrogenase phosphatase regulatory subunit | Pdpr  | 307852 | 1,17 | down |
| 6646625 | 7181086 | 1327926 | pyruvate dehydrogenase phosphatase regulatory subunit | Pdpr  | 307852 | 1,07 | down |
| 6736847 | 7181086 | 1327913 | pyruvate dehydrogenase phosphatase regulatory subunit | Pdpr  | 307852 | 1,23 | down |
| 5700873 | 7147275 | 1243987 | pyruvate kinase, muscle                               | Pkm2  | 25630  | 1,11 | down |
| 5819675 | 7147275 | 1243985 | pyruvate kinase, muscle                               | Pkm2  | 25630  | 2,17 | down |
| 6558213 | 7147275 | 1243986 | pyruvate kinase, muscle                               | Pkm2  | 25630  | 1,05 | up   |
| 6641752 | 7147275 | 1243985 | pyruvate kinase, muscle                               | Pkm2  | 25630  | 1,06 | up   |
| 5636905 | 7333533 | 1703803 | queuine tRNA-ribosyltransferase 1                     | Qtrt1 | 64016  | 1,27 | up   |



|         |         |         |                                              |         |        |      |      |
|---------|---------|---------|----------------------------------------------|---------|--------|------|------|
| 5751081 | 7333533 | 1703804 | queuine tRNA-ribosyltransferase 1            | Qtrt1   | 64016  | 1,14 | up   |
| 5758686 | 7333533 | 1703800 | queuine tRNA-ribosyltransferase 1            | Qtrt1   | 64016  | 1,17 | down |
| 5766628 | 7333533 | 1703802 | queuine tRNA-ribosyltransferase 1            | Qtrt1   | 64016  | 1,04 | down |
| 5777121 | 7333533 | 1703801 | queuine tRNA-ribosyltransferase 1            | Qtrt1   | 64016  | 1,99 | up   |
| 5846165 | 7333533 | 1703805 | queuine tRNA-ribosyltransferase 1            | Qtrt1   | 64016  | 1,15 | up   |
| 6019769 | 7333533 | 1703806 | queuine tRNA-ribosyltransferase 1            | Qtrt1   | 64016  | 1,21 | up   |
| 6034219 | 7333533 | 1703805 | queuine tRNA-ribosyltransferase 1            | Qtrt1   | 64016  | 3,73 | down |
| 6035844 | 7333533 | 1703798 | queuine tRNA-ribosyltransferase 1            | Qtrt1   | 64016  | 1,54 | down |
| 6054763 | 7333533 | 1703796 | queuine tRNA-ribosyltransferase 1            | Qtrt1   | 64016  | 1,51 | down |
| 6312215 | 7333533 | 1703799 | queuine tRNA-ribosyltransferase 1            | Qtrt1   | 64016  | 1,34 | up   |
| 6375017 | 7333533 | 1703797 | queuine tRNA-ribosyltransferase 1            | Qtrt1   | 64016  | 1,11 | down |
| 6525558 | 7333533 | 1703799 | queuine tRNA-ribosyltransferase 1            | Qtrt1   | 64016  | 1,19 | up   |
| 6594863 | 7333533 | 1703796 | queuine tRNA-ribosyltransferase 1            | Qtrt1   | 64016  | 1,40 | down |
| 6628436 | 7333533 | 1703798 | queuine tRNA-ribosyltransferase 1            | Qtrt1   | 64016  | 2,11 | up   |
| 5662205 | 7236962 | 1465623 | quiescin Q6 sulfhydryl oxidase 2             | Qsox2   | 681023 | 1,28 | down |
| 5686769 | 7236962 | 1465620 | quiescin Q6 sulfhydryl oxidase 2             | Qsox2   | 681023 | 1,02 | down |
| 5694861 | 7236962 | 1465617 | quiescin Q6 sulfhydryl oxidase 2             | Qsox2   | 681023 | 2,76 | down |
| 5789058 | 7236962 | 1465618 | quiescin Q6 sulfhydryl oxidase 2             | Qsox2   | 681023 | 1,05 | down |
| 5896860 | 7236962 | 1465633 | quiescin Q6 sulfhydryl oxidase 2             | Qsox2   | 681023 | 1,11 | up   |
| 5937771 | 7236962 | 1465619 | quiescin Q6 sulfhydryl oxidase 2             | Qsox2   | 681023 | 1,17 | down |
| 5983936 | 7236962 | 1465621 | quiescin Q6 sulfhydryl oxidase 2             | Qsox2   | 681023 | 1,05 | down |
| 5997795 | 7236962 | 1465622 | quiescin Q6 sulfhydryl oxidase 2             | Qsox2   | 681023 | 1,15 | down |
| 6010710 | 7236962 | 1465625 | quiescin Q6 sulfhydryl oxidase 2             | Qsox2   | 681023 | 1,01 | down |
| 6056554 | 7236962 | 1465629 | quiescin Q6 sulfhydryl oxidase 2             | Qsox2   | 681023 | 1,08 | up   |
| 6123187 | 7236962 | 1465627 | quiescin Q6 sulfhydryl oxidase 2             | Qsox2   | 681023 | 1,34 | up   |
| 6361831 | 7236962 | 1465626 | quiescin Q6 sulfhydryl oxidase 2             | Qsox2   | 681023 | 1,03 | up   |
| 6456431 | 7236962 | 1465618 | quiescin Q6 sulfhydryl oxidase 2             | Qsox2   | 681023 | 1,08 | up   |
| 6526523 | 7236962 | 1465618 | quiescin Q6 sulfhydryl oxidase 2             | Qsox2   | 681023 | 1,06 | down |
| 6714308 | 7236962 | 1465628 | quiescin Q6 sulfhydryl oxidase 2             | Qsox2   | 681023 | 1,18 | down |
| 6739973 | 7236962 | 1465618 | quiescin Q6 sulfhydryl oxidase 2             | Qsox2   | 681023 | 1,09 | down |
| 5694664 | 7138281 | 1221775 | Rab geranylgeranyltransferase, alpha subunit | Rabggt1 | 58983  | 1,23 | up   |
| 5703584 | 7138281 | 1221769 | Rab geranylgeranyltransferase, alpha subunit | Rabggt1 | 58983  | 1,18 | down |
| 5716544 | 7138281 | 1221785 | Rab geranylgeranyltransferase, alpha subunit | Rabggt1 | 58983  | 1,38 | up   |
| 5785411 | 7138281 | 1221781 | Rab geranylgeranyltransferase, alpha subunit | Rabggt1 | 58983  | 1,16 | up   |
| 5875604 | 7138281 | 1221778 | Rab geranylgeranyltransferase, alpha subunit | Rabggt1 | 58983  | 1,09 | down |
| 5937160 | 7138281 | 1221779 | Rab geranylgeranyltransferase, alpha subunit | Rabggt1 | 58983  | 1,05 | down |
| 5941831 | 7138281 | 1221771 | Rab geranylgeranyltransferase, alpha subunit | Rabggt1 | 58983  | 1,36 | down |
| 6035551 | 7138281 | 1221774 | Rab geranylgeranyltransferase, alpha subunit | Rabggt1 | 58983  | 1,15 | down |
| 6068157 | 7138281 | 1221780 | Rab geranylgeranyltransferase, alpha subunit | Rabggt1 | 58983  | 1,21 | up   |
| 6078760 | 7138281 | 1221773 | Rab geranylgeranyltransferase, alpha subunit | Rabggt1 | 58983  | 1,18 | down |
| 6119059 | 7138281 | 1221772 | Rab geranylgeranyltransferase, alpha subunit | Rabggt1 | 58983  | 1,14 | down |
| 6166302 | 7138281 | 1221770 | Rab geranylgeranyltransferase, alpha subunit | Rabggt1 | 58983  | 1,21 | down |
| 6243182 | 7138281 | 1221777 | Rab geranylgeranyltransferase, alpha subunit | Rabggt1 | 58983  | 2,23 | down |
| 6361601 | 7138281 | 1221773 | Rab geranylgeranyltransferase, alpha subunit | Rabggt1 | 58983  | 1,01 | down |
| 6374192 | 7138281 | 1221783 | Rab geranylgeranyltransferase, alpha subunit | Rabggt1 | 58983  | 1,66 | up   |
| 6392325 | 7138281 | 1221776 | Rab geranylgeranyltransferase, alpha subunit | Rabggt1 | 58983  | 1,14 | down |
| 6412464 | 7138281 | 1221771 | Rab geranylgeranyltransferase, alpha subunit | Rabggt1 | 58983  | 1,14 | down |
| 6575834 | 7138281 | 1221784 | Rab geranylgeranyltransferase, alpha subunit | Rabggt1 | 58983  | 1,02 | up   |
| 6653278 | 7138281 | 1221782 | Rab geranylgeranyltransferase, alpha subunit | Rabggt1 | 58983  | 1,15 | up   |
| 6700177 | 7138281 | 1221768 | Rab geranylgeranyltransferase, alpha subunit | Rabggt1 | 58983  | 1,14 | up   |
| 6731799 | 7138281 | 1221779 | Rab geranylgeranyltransferase, alpha subunit | Rabggt1 | 58983  | 1,06 | up   |
| 6105486 | 7097380 | 1120626 | RAB, member RAS oncogene family-like 5       | Rab15   | 288585 | 1,03 | down |
| 6304541 | 7097380 | 1120625 | RAB, member RAS oncogene family-like 5       | Rab15   | 288585 | 1,17 | down |
| 6465539 | 7097380 | 1120624 | RAB, member RAS oncogene family-like 5       | Rab15   | 288585 | 1,56 | down |
| 6651148 | 7097380 | 1120627 | RAB, member RAS oncogene family-like 5       | Rab15   | 288585 | 1,29 | up   |
| 6679529 | 7097380 | 1120628 | RAB, member RAS oncogene family-like 5       | Rab15   | 288585 | 1,10 | up   |

|         |         |         |                                        |         |        |      |      |
|---------|---------|---------|----------------------------------------|---------|--------|------|------|
| 6711835 | 7097380 | 1120627 | RAB, member RAS oncogene family-like 5 | Rab15   | 288585 | 1,04 | down |
| 6727663 | 7097380 | 1120624 | RAB, member RAS oncogene family-like 5 | Rab15   | 288585 | 2,18 | up   |
| 5970956 | 7196380 | 1366519 | RAB13, member RAS oncogene family      | Rab13   | 81756  | 1,56 | down |
| 6001352 | 7196380 | 1366518 | RAB13, member RAS oncogene family      | Rab13   | 81756  | 2,52 | down |
| 6222837 | 7196380 | 1366515 | RAB13, member RAS oncogene family      | Rab13   | 81756  | 1,02 | down |
| 6273741 | 7196380 | 1366513 | RAB13, member RAS oncogene family      | Rab13   | 81756  | 1,11 | up   |
| 6373231 | 7196380 | 1366516 | RAB13, member RAS oncogene family      | Rab13   | 81756  | 1,08 | down |
| 6377374 | 7196380 | 1366512 | RAB13, member RAS oncogene family      | Rab13   | 81756  | 1,48 | up   |
| 6524378 | 7196380 | 1366514 | RAB13, member RAS oncogene family      | Rab13   | 81756  | 1,67 | up   |
| 6544566 | 7196380 | 1366517 | RAB13, member RAS oncogene family      | Rab13   | 81756  | 1,33 | up   |
| 5745722 | 7075338 | 1069034 | RAB26, member RAS oncogene family      | Rab26   | 171111 | 1,35 | up   |
| 5800208 | 7075338 | 1069033 | RAB26, member RAS oncogene family      | Rab26   | 171111 | 1,29 | up   |
| 5842508 | 7075338 | 1069035 | RAB26, member RAS oncogene family      | Rab26   | 171111 | 1,45 | down |
| 5925819 | 7075338 | 1069042 | RAB26, member RAS oncogene family      | Rab26   | 171111 | 2,38 | down |
| 6031264 | 7075338 | 1069042 | RAB26, member RAS oncogene family      | Rab26   | 171111 | 1,19 | up   |
| 6172017 | 7075338 | 1069036 | RAB26, member RAS oncogene family      | Rab26   | 171111 | 1,35 | up   |
| 6341000 | 7075338 | 1069038 | RAB26, member RAS oncogene family      | Rab26   | 171111 | 1,43 | down |
| 6406463 | 7075338 | 1069037 | RAB26, member RAS oncogene family      | Rab26   | 171111 | 1,08 | down |
| 6408689 | 7075338 | 1069040 | RAB26, member RAS oncogene family      | Rab26   | 171111 | 1,39 | down |
| 6414493 | 7075338 | 1069039 | RAB26, member RAS oncogene family      | Rab26   | 171111 | 1,09 | up   |
| 6594671 | 7075338 | 1069041 | RAB26, member RAS oncogene family      | Rab26   | 171111 | 1,08 | up   |
| 5669712 | 7098535 | 1123955 | rabphilin 3A                           | Rph3a   | 171039 | 1,15 | down |
| 5690862 | 7098535 | 1123954 | rabphilin 3A                           | Rph3a   | 171039 | 1,53 | up   |
| 5841137 | 7098535 | 1123961 | rabphilin 3A                           | Rph3a   | 171039 | 1,10 | up   |
| 5913503 | 7098535 | 1123968 | rabphilin 3A                           | Rph3a   | 171039 | 1,09 | down |
| 6042218 | 7098535 | 1123962 | rabphilin 3A                           | Rph3a   | 171039 | 1,02 | down |
| 6163583 | 7098535 | 1123953 | rabphilin 3A                           | Rph3a   | 171039 | 1,06 | up   |
| 6228141 | 7098535 | 1123956 | rabphilin 3A                           | Rph3a   | 171039 | 1,13 | up   |
| 6235055 | 7098535 | 1123966 | rabphilin 3A                           | Rph3a   | 171039 | 1,03 | down |
| 6277109 | 7098535 | 1123952 | rabphilin 3A                           | Rph3a   | 171039 | 1,07 | up   |
| 6310034 | 7098535 | 1123955 | rabphilin 3A                           | Rph3a   | 171039 | 2,11 | down |
| 6395188 | 7098535 | 1123959 | rabphilin 3A                           | Rph3a   | 171039 | 1,10 | down |
| 6479823 | 7098535 | 1123967 | rabphilin 3A                           | Rph3a   | 171039 | 1,35 | up   |
| 6481724 | 7098535 | 1123951 | rabphilin 3A                           | Rph3a   | 171039 | 1,11 | up   |
| 6510283 | 7098535 | 1123969 | rabphilin 3A                           | Rph3a   | 171039 | 1,23 | down |
| 6526409 | 7098535 | 1123950 | rabphilin 3A                           | Rph3a   | 171039 | 1,39 | down |
| 6531652 | 7098535 | 1123957 | rabphilin 3A                           | Rph3a   | 171039 | 1,03 | down |
| 6572645 | 7098535 | 1123957 | rabphilin 3A                           | Rph3a   | 171039 | 1,17 | down |
| 6613679 | 7098535 | 1123964 | rabphilin 3A                           | Rph3a   | 171039 | 1,06 | up   |
| 6657078 | 7098535 | 1123960 | rabphilin 3A                           | Rph3a   | 171039 | 1,03 | up   |
| 6694179 | 7098535 | 1123963 | rabphilin 3A                           | Rph3a   | 171039 | 1,03 | up   |
| 6703418 | 7098535 | 1123958 | rabphilin 3A                           | Rph3a   | 171039 | 1,75 | down |
| 6718767 | 7098535 | 1123965 | rabphilin 3A                           | Rph3a   | 171039 | 1,00 | up   |
| 5702067 | 7331732 | 1699985 | Rac GTPase-activating protein 1        | Racgap1 | 315298 | 2,07 | down |
| 5707573 | 7331732 | 1699973 | Rac GTPase-activating protein 1        | Racgap1 | 315298 | 1,21 | up   |
| 5834806 | 7331732 | 1699982 | Rac GTPase-activating protein 1        | Racgap1 | 315298 | 1,14 | up   |
| 5854292 | 7331732 | 1699987 | Rac GTPase-activating protein 1        | Racgap1 | 315298 | 1,37 | up   |
| 5930322 | 7331732 | 1699978 | Rac GTPase-activating protein 1        | Racgap1 | 315298 | 1,08 | up   |
| 5941969 | 7331732 | 1699979 | Rac GTPase-activating protein 1        | Racgap1 | 315298 | 2,88 | down |
| 5988844 | 7331732 | 1699973 | Rac GTPase-activating protein 1        | Racgap1 | 315298 | 1,08 | up   |
| 6011673 | 7331732 | 1699976 | Rac GTPase-activating protein 1        | Racgap1 | 315298 | 1,23 | down |
| 6042157 | 7331732 | 1699983 | Rac GTPase-activating protein 1        | Racgap1 | 315298 | 1,20 | down |
| 6054374 | 7331732 | 1699982 | Rac GTPase-activating protein 1        | Racgap1 | 315298 | 1,63 | down |
| 6071598 | 7331732 | 1699977 | Rac GTPase-activating protein 1        | Racgap1 | 315298 | 1,04 | up   |
| 6141059 | 7331732 | 1699988 | Rac GTPase-activating protein 1        | Racgap1 | 315298 | 1,05 | up   |
| 6316810 | 7331732 | 1699980 | Rac GTPase-activating protein 1        | Racgap1 | 315298 | 1,24 | down |

|         |         |         |                                                       |         |        |      |      |
|---------|---------|---------|-------------------------------------------------------|---------|--------|------|------|
| 6389584 | 7331732 | 1699984 | Rac GTPase-activating protein 1                       | Racgap1 | 315298 | 1,35 | up   |
| 6418371 | 7331732 | 1699986 | Rac GTPase-activating protein 1                       | Racgap1 | 315298 | 1,38 | down |
| 6481425 | 7331732 | 1699975 | Rac GTPase-activating protein 1                       | Racgap1 | 315298 | 1,12 | down |
| 6490990 | 7331732 | 1699973 | Rac GTPase-activating protein 1                       | Racgap1 | 315298 | 1,29 | up   |
| 6581877 | 7331732 | 1699974 | Rac GTPase-activating protein 1                       | Racgap1 | 315298 | 1,36 | up   |
| 6596845 | 7331732 | 1699990 | Rac GTPase-activating protein 1                       | Racgap1 | 315298 | 1,33 | up   |
| 6640670 | 7331732 | 1699981 | Rac GTPase-activating protein 1                       | Racgap1 | 315298 | 1,36 | down |
| 5654498 | 7268375 | 1543453 | RAD18 homolog (S. cerevisiae)                         | Rad18   | 362412 | 1,06 | up   |
| 5656361 | 7268375 | 1543456 | RAD18 homolog (S. cerevisiae)                         | Rad18   | 362412 | 1,14 | up   |
| 5673555 | 7268375 | 1543451 | RAD18 homolog (S. cerevisiae)                         | Rad18   | 362412 | 1,15 | up   |
| 5720322 | 7268375 | 1543438 | RAD18 homolog (S. cerevisiae)                         | Rad18   | 362412 | 1,66 | down |
| 5777901 | 7268375 | 1543452 | RAD18 homolog (S. cerevisiae)                         | Rad18   | 362412 | 1,10 | down |
| 5896561 | 7268375 | 1543448 | RAD18 homolog (S. cerevisiae)                         | Rad18   | 362412 | 1,23 | down |
| 5960898 | 7268375 | 1543451 | RAD18 homolog (S. cerevisiae)                         | Rad18   | 362412 | 1,20 | down |
| 6075907 | 7268375 | 1543444 | RAD18 homolog (S. cerevisiae)                         | Rad18   | 362412 | 1,23 | down |
| 6091083 | 7268375 | 1543442 | RAD18 homolog (S. cerevisiae)                         | Rad18   | 362412 | 1,43 | up   |
| 6100988 | 7268375 | 1543450 | RAD18 homolog (S. cerevisiae)                         | Rad18   | 362412 | 1,10 | up   |
| 6154165 | 7268375 | 1543454 | RAD18 homolog (S. cerevisiae)                         | Rad18   | 362412 | 1,12 | up   |
| 6176803 | 7268375 | 1543436 | RAD18 homolog (S. cerevisiae)                         | Rad18   | 362412 | 1,25 | up   |
| 6271924 | 7268375 | 1543451 | RAD18 homolog (S. cerevisiae)                         | Rad18   | 362412 | 1,22 | down |
| 6399659 | 7268375 | 1543457 | RAD18 homolog (S. cerevisiae)                         | Rad18   | 362412 | 1,20 | down |
| 6565916 | 7268375 | 1543449 | RAD18 homolog (S. cerevisiae)                         | Rad18   | 362412 | 1,14 | down |
| 6596240 | 7268375 | 1543447 | RAD18 homolog (S. cerevisiae)                         | Rad18   | 362412 | 1,16 | up   |
| 6687561 | 7268375 | 1543436 | RAD18 homolog (S. cerevisiae)                         | Rad18   | 362412 | 1,44 | down |
| 5654600 | 7305174 | 1635451 | radical S-adenosyl methionine domain containing 2     | Rsad2   | 65190  | 2,77 | down |
| 6119722 | 7305174 | 1635451 | radical S-adenosyl methionine domain containing 2     | Rsad2   | 65190  | 1,18 | up   |
| 6142093 | 7305174 | 1635457 | radical S-adenosyl methionine domain containing 2     | Rsad2   | 65190  | 4,44 | down |
| 6253424 | 7305174 | 1635451 | radical S-adenosyl methionine domain containing 2     | Rsad2   | 65190  | 1,78 | down |
| 6265562 | 7305174 | 1635452 | radical S-adenosyl methionine domain containing 2     | Rsad2   | 65190  | 1,16 | down |
| 6306839 | 7305174 | 1635454 | radical S-adenosyl methionine domain containing 2     | Rsad2   | 65190  | 1,50 | up   |
| 6318232 | 7305174 | 1635451 | radical S-adenosyl methionine domain containing 2     | Rsad2   | 65190  | 1,51 | up   |
| 6358603 | 7305174 | 1635453 | radical S-adenosyl methionine domain containing 2     | Rsad2   | 65190  | 1,65 | down |
| 6460507 | 7305174 | 1635451 | radical S-adenosyl methionine domain containing 2     | Rsad2   | 65190  | 1,47 | up   |
| 6560848 | 7305174 | 1635456 | radical S-adenosyl methionine domain containing 2     | Rsad2   | 65190  | 1,21 | up   |
| 6611263 | 7305174 | 1635455 | radical S-adenosyl methionine domain containing 2     | Rsad2   | 65190  | 1,13 | up   |
| 5703023 | 7221019 | 1425318 | ral guanine nucleotide dissociation stimulator-like 2 | Rgl2    | 294283 | 1,07 | up   |
| 5796897 | 7221019 | 1425326 | ral guanine nucleotide dissociation stimulator-like 2 | Rgl2    | 294283 | 1,33 | up   |
| 5874182 | 7221019 | 1425326 | ral guanine nucleotide dissociation stimulator-like 2 | Rgl2    | 294283 | 1,20 | up   |
| 5959183 | 7221019 | 1425314 | ral guanine nucleotide dissociation stimulator-like 2 | Rgl2    | 294283 | 1,10 | up   |
| 5981046 | 7221019 | 1425325 | ral guanine nucleotide dissociation stimulator-like 2 | Rgl2    | 294283 | 1,06 | down |
| 6007148 | 7221019 | 1425309 | ral guanine nucleotide dissociation stimulator-like 2 | Rgl2    | 294283 | 1,28 | down |
| 6019039 | 7221019 | 1425312 | ral guanine nucleotide dissociation stimulator-like 2 | Rgl2    | 294283 | 1,42 | down |
| 6051693 | 7221019 | 1425320 | ral guanine nucleotide dissociation stimulator-like 2 | Rgl2    | 294283 | 1,18 | up   |
| 6059718 | 7221019 | 1425312 | ral guanine nucleotide dissociation stimulator-like 2 | Rgl2    | 294283 | 1,00 | up   |
| 6166579 | 7221019 | 1425313 | ral guanine nucleotide dissociation stimulator-like 2 | Rgl2    | 294283 | 1,22 | up   |
| 6179929 | 7221019 | 1425317 | ral guanine nucleotide dissociation stimulator-like 2 | Rgl2    | 294283 | 1,67 | up   |
| 6196980 | 7221019 | 1425322 | ral guanine nucleotide dissociation stimulator-like 2 | Rgl2    | 294283 | 1,44 | up   |
| 6296369 | 7221019 | 1425324 | ral guanine nucleotide dissociation stimulator-like 2 | Rgl2    | 294283 | 1,37 | down |
| 6384729 | 7221019 | 1425319 | ral guanine nucleotide dissociation stimulator-like 2 | Rgl2    | 294283 | 1,24 | down |
| 6441081 | 7221019 | 1425323 | ral guanine nucleotide dissociation stimulator-like 2 | Rgl2    | 294283 | 1,42 | down |
| 6509648 | 7221019 | 1425321 | ral guanine nucleotide dissociation stimulator-like 2 | Rgl2    | 294283 | 1,07 | up   |
| 6545652 | 7221019 | 1425311 | ral guanine nucleotide dissociation stimulator-like 2 | Rgl2    | 294283 | 1,15 | up   |
| 6576029 | 7221019 | 1425316 | ral guanine nucleotide dissociation stimulator-like 2 | Rgl2    | 294283 | 1,52 | up   |
| 6716761 | 7221019 | 1425310 | ral guanine nucleotide dissociation stimulator-like 2 | Rgl2    | 294283 | 1,67 | down |
| 6719006 | 7221019 | 1425315 | ral guanine nucleotide dissociation stimulator-like 2 | Rgl2    | 294283 | 1,03 | up   |
| 5655397 | 7331416 | 1699164 | Rap guanine nucleotide exchange factor (GEF) 3        | Rapgef3 | 59326  | 1,01 | up   |

|         |         |         |                                                |         |        |      |      |
|---------|---------|---------|------------------------------------------------|---------|--------|------|------|
| 5706514 | 7331416 | 1699169 | Rap guanine nucleotide exchange factor (GEF) 3 | Rapgef3 | 59326  | 1,12 | down |
| 5740888 | 7331416 | 1699169 | Rap guanine nucleotide exchange factor (GEF) 3 | Rapgef3 | 59326  | 1,02 | down |
| 5769806 | 7331416 | 1699168 | Rap guanine nucleotide exchange factor (GEF) 3 | Rapgef3 | 59326  | 1,86 | down |
| 5793013 | 7331416 | 1699165 | Rap guanine nucleotide exchange factor (GEF) 3 | Rapgef3 | 59326  | 1,08 | down |
| 5826332 | 7331416 | 1699150 | Rap guanine nucleotide exchange factor (GEF) 3 | Rapgef3 | 59326  | 1,14 | up   |
| 5910345 | 7331416 | 1699159 | Rap guanine nucleotide exchange factor (GEF) 3 | Rapgef3 | 59326  | 1,40 | down |
| 5918268 | 7331416 | 1699161 | Rap guanine nucleotide exchange factor (GEF) 3 | Rapgef3 | 59326  | 1,31 | down |
| 5921545 | 7331416 | 1699143 | Rap guanine nucleotide exchange factor (GEF) 3 | Rapgef3 | 59326  | 1,16 | down |
| 5923242 | 7331416 | 1699154 | Rap guanine nucleotide exchange factor (GEF) 3 | Rapgef3 | 59326  | 1,60 | down |
| 5992200 | 7331416 | 1699156 | Rap guanine nucleotide exchange factor (GEF) 3 | Rapgef3 | 59326  | 1,56 | up   |
| 6025288 | 7331416 | 1699160 | Rap guanine nucleotide exchange factor (GEF) 3 | Rapgef3 | 59326  | 1,91 | up   |
| 6045229 | 7331416 | 1699158 | Rap guanine nucleotide exchange factor (GEF) 3 | Rapgef3 | 59326  | 2,13 | up   |
| 6144041 | 7331416 | 1699155 | Rap guanine nucleotide exchange factor (GEF) 3 | Rapgef3 | 59326  | 1,40 | up   |
| 6161171 | 7331416 | 1699151 | Rap guanine nucleotide exchange factor (GEF) 3 | Rapgef3 | 59326  | 1,37 | down |
| 6169025 | 7331416 | 1699149 | Rap guanine nucleotide exchange factor (GEF) 3 | Rapgef3 | 59326  | 1,19 | down |
| 6270271 | 7331416 | 1699162 | Rap guanine nucleotide exchange factor (GEF) 3 | Rapgef3 | 59326  | 1,23 | up   |
| 6277508 | 7331416 | 1699166 | Rap guanine nucleotide exchange factor (GEF) 3 | Rapgef3 | 59326  | 1,27 | down |
| 6285762 | 7331416 | 1699144 | Rap guanine nucleotide exchange factor (GEF) 3 | Rapgef3 | 59326  | 1,02 | up   |
| 6292977 | 7331416 | 1699146 | Rap guanine nucleotide exchange factor (GEF) 3 | Rapgef3 | 59326  | 1,27 | down |
| 6385069 | 7331416 | 1699148 | Rap guanine nucleotide exchange factor (GEF) 3 | Rapgef3 | 59326  | 1,04 | down |
| 6398464 | 7331416 | 1699163 | Rap guanine nucleotide exchange factor (GEF) 3 | Rapgef3 | 59326  | 1,01 | up   |
| 6470284 | 7331416 | 1699153 | Rap guanine nucleotide exchange factor (GEF) 3 | Rapgef3 | 59326  | 1,96 | up   |
| 6474285 | 7331416 | 1699157 | Rap guanine nucleotide exchange factor (GEF) 3 | Rapgef3 | 59326  | 1,18 | down |
| 6541283 | 7331416 | 1699160 | Rap guanine nucleotide exchange factor (GEF) 3 | Rapgef3 | 59326  | 1,02 | down |
| 6546988 | 7331416 | 1699167 | Rap guanine nucleotide exchange factor (GEF) 3 | Rapgef3 | 59326  | 1,33 | down |
| 6552796 | 7331416 | 1699169 | Rap guanine nucleotide exchange factor (GEF) 3 | Rapgef3 | 59326  | 1,24 | down |
| 6554480 | 7331416 | 1699145 | Rap guanine nucleotide exchange factor (GEF) 3 | Rapgef3 | 59326  | 1,22 | down |
| 6705829 | 7331416 | 1699147 | Rap guanine nucleotide exchange factor (GEF) 3 | Rapgef3 | 59326  | 1,77 | up   |
| 6714548 | 7331416 | 1699152 | Rap guanine nucleotide exchange factor (GEF) 3 | Rapgef3 | 59326  | 1,43 | up   |
| 5654313 | 7067670 | 1050367 | Rap guanine nucleotide exchange factor (GEF) 6 | Rapgef6 | 303141 | 1,39 | down |
| 5709972 | 7067670 | 1050352 | Rap guanine nucleotide exchange factor (GEF) 6 | Rapgef6 | 303141 | 1,34 | down |
| 5739533 | 7067670 | 1050348 | Rap guanine nucleotide exchange factor (GEF) 6 | Rapgef6 | 303141 | 1,25 | down |
| 5762597 | 7067670 | 1050337 | Rap guanine nucleotide exchange factor (GEF) 6 | Rapgef6 | 303141 | 1,06 | down |
| 5813100 | 7067670 | 1050371 | Rap guanine nucleotide exchange factor (GEF) 6 | Rapgef6 | 303141 | 1,12 | up   |
| 5849460 | 7067670 | 1050341 | Rap guanine nucleotide exchange factor (GEF) 6 | Rapgef6 | 303141 | 1,30 | down |
| 5853874 | 7067670 | 1050372 | Rap guanine nucleotide exchange factor (GEF) 6 | Rapgef6 | 303141 | 1,38 | down |
| 5954192 | 7067670 | 1050326 | Rap guanine nucleotide exchange factor (GEF) 6 | Rapgef6 | 303141 | 1,20 | down |
| 6000044 | 7067670 | 1050329 | Rap guanine nucleotide exchange factor (GEF) 6 | Rapgef6 | 303141 | 1,67 | down |
| 6035905 | 7067670 | 1050327 | Rap guanine nucleotide exchange factor (GEF) 6 | Rapgef6 | 303141 | 1,17 | down |
| 6050518 | 7067670 | 1050342 | Rap guanine nucleotide exchange factor (GEF) 6 | Rapgef6 | 303141 | 1,10 | down |
| 6061193 | 7067670 | 1050354 | Rap guanine nucleotide exchange factor (GEF) 6 | Rapgef6 | 303141 | 1,34 | down |
| 6070907 | 7067670 | 1050358 | Rap guanine nucleotide exchange factor (GEF) 6 | Rapgef6 | 303141 | 1,05 | down |
| 6099656 | 7067670 | 1050347 | Rap guanine nucleotide exchange factor (GEF) 6 | Rapgef6 | 303141 | 1,47 | down |
| 6121556 | 7067670 | 1050350 | Rap guanine nucleotide exchange factor (GEF) 6 | Rapgef6 | 303141 | 1,20 | down |
| 6155608 | 7067670 | 1050356 | Rap guanine nucleotide exchange factor (GEF) 6 | Rapgef6 | 303141 | 1,26 | down |
| 6190213 | 7067670 | 1050339 | Rap guanine nucleotide exchange factor (GEF) 6 | Rapgef6 | 303141 | 1,06 | down |
| 6238793 | 7067670 | 1050359 | Rap guanine nucleotide exchange factor (GEF) 6 | Rapgef6 | 303141 | 1,37 | down |
| 6255902 | 7067670 | 1050353 | Rap guanine nucleotide exchange factor (GEF) 6 | Rapgef6 | 303141 | 1,43 | down |
| 6365768 | 7067670 | 1050360 | Rap guanine nucleotide exchange factor (GEF) 6 | Rapgef6 | 303141 | 1,30 | down |
| 6375865 | 7067670 | 1050338 | Rap guanine nucleotide exchange factor (GEF) 6 | Rapgef6 | 303141 | 1,28 | down |
| 6474781 | 7067670 | 1050336 | Rap guanine nucleotide exchange factor (GEF) 6 | Rapgef6 | 303141 | 1,14 | down |
| 6506956 | 7067670 | 1050331 | Rap guanine nucleotide exchange factor (GEF) 6 | Rapgef6 | 303141 | 1,98 | down |
| 6535368 | 7067670 | 1050350 | Rap guanine nucleotide exchange factor (GEF) 6 | Rapgef6 | 303141 | 1,33 | down |
| 6549191 | 7067670 | 1050369 | Rap guanine nucleotide exchange factor (GEF) 6 | Rapgef6 | 303141 | 1,40 | down |
| 6575854 | 7067670 | 1050340 | Rap guanine nucleotide exchange factor (GEF) 6 | Rapgef6 | 303141 | 1,44 | down |
| 6586349 | 7067670 | 1050353 | Rap guanine nucleotide exchange factor (GEF) 6 | Rapgef6 | 303141 | 1,37 | down |

|         |         |         |                                                      |         |        |      |      |
|---------|---------|---------|------------------------------------------------------|---------|--------|------|------|
| 6616117 | 7067670 | 1050335 | Rap guanine nucleotide exchange factor (GEF) 6       | Rapgef6 | 303141 | 1,09 | down |
| 6688975 | 7067670 | 1050370 | Rap guanine nucleotide exchange factor (GEF) 6       | Rapgef6 | 303141 | 1,32 | down |
| 6705661 | 7067670 | 1050348 | Rap guanine nucleotide exchange factor (GEF) 6       | Rapgef6 | 303141 | 1,05 | down |
| 6710322 | 7067670 | 1050328 | Rap guanine nucleotide exchange factor (GEF) 6       | Rapgef6 | 303141 | 1,08 | down |
| 6738397 | 7067670 | 1050372 | Rap guanine nucleotide exchange factor (GEF) 6       | Rapgef6 | 303141 | 1,07 | up   |
| 6743830 | 7067670 | 1050332 | Rap guanine nucleotide exchange factor (GEF) 6       | Rapgef6 | 303141 | 1,21 | down |
| 5668827 | 7337522 | 1713633 | RAR-related orphan receptor alpha                    | Rora    | 300807 | 1,33 | up   |
| 5716188 | 7337522 | 1713640 | RAR-related orphan receptor alpha                    | Rora    | 300807 | 1,01 | up   |
| 5746130 | 7337522 | 1713632 | RAR-related orphan receptor alpha                    | Rora    | 300807 | 1,15 | up   |
| 5789380 | 7337522 | 1713638 | RAR-related orphan receptor alpha                    | Rora    | 300807 | 1,32 | up   |
| 5806656 | 7337522 | 1713636 | RAR-related orphan receptor alpha                    | Rora    | 300807 | 1,32 | up   |
| 5918130 | 7337522 | 1713641 | RAR-related orphan receptor alpha                    | Rora    | 300807 | 1,40 | up   |
| 6048578 | 7337522 | 1713637 | RAR-related orphan receptor alpha                    | Rora    | 300807 | 1,24 | up   |
| 6053612 | 7337522 | 1713641 | RAR-related orphan receptor alpha                    | Rora    | 300807 | 1,15 | up   |
| 6165070 | 7337522 | 1713632 | RAR-related orphan receptor alpha                    | Rora    | 300807 | 1,21 | up   |
| 6243402 | 7337522 | 1713590 | RAR-related orphan receptor alpha                    | Rora    | 300807 | 1,12 | down |
| 6295135 | 7337522 | 1713590 | RAR-related orphan receptor alpha                    | Rora    | 300807 | 1,26 | down |
| 6358143 | 7337522 | 1713642 | RAR-related orphan receptor alpha                    | Rora    | 300807 | 1,19 | up   |
| 6447604 | 7337522 | 1713629 | RAR-related orphan receptor alpha                    | Rora    | 300807 | 1,12 | down |
| 6590492 | 7337522 | 1713615 | RAR-related orphan receptor alpha                    | Rora    | 300807 | 1,39 | down |
| 5628933 | 7131742 | 1205798 | RAS (RAD and GEM) like GTP binding 2                 | Rem2    | 64626  | 1,13 | down |
| 5648472 | 7131742 | 1205799 | RAS (RAD and GEM) like GTP binding 2                 | Rem2    | 64626  | 1,17 | up   |
| 5719349 | 7131742 | 1205799 | RAS (RAD and GEM) like GTP binding 2                 | Rem2    | 64626  | 1,10 | down |
| 6061036 | 7131742 | 1205801 | RAS (RAD and GEM) like GTP binding 2                 | Rem2    | 64626  | 1,08 | down |
| 6249494 | 7131742 | 1205802 | RAS (RAD and GEM) like GTP binding 2                 | Rem2    | 64626  | 1,13 | up   |
| 6363104 | 7131742 | 1205802 | RAS (RAD and GEM) like GTP binding 2                 | Rem2    | 64626  | 2,43 | up   |
| 6550033 | 7131742 | 1205800 | RAS (RAD and GEM) like GTP binding 2                 | Rem2    | 64626  | 1,00 | up   |
| 5632800 | 7233970 | 1458271 | RAS (RAD and GEM)-like GTP-binding 1                 | Rem1    | 366232 | 1,44 | down |
| 5726896 | 7233970 | 1458274 | RAS (RAD and GEM)-like GTP-binding 1                 | Rem1    | 366232 | 1,13 | down |
| 5862972 | 7233970 | 1458275 | RAS (RAD and GEM)-like GTP-binding 1                 | Rem1    | 366232 | 1,10 | down |
| 5886564 | 7233970 | 1458271 | RAS (RAD and GEM)-like GTP-binding 1                 | Rem1    | 366232 | 3,04 | down |
| 5917193 | 7233970 | 1458271 | RAS (RAD and GEM)-like GTP-binding 1                 | Rem1    | 366232 | 1,63 | down |
| 5999231 | 7233970 | 1458271 | RAS (RAD and GEM)-like GTP-binding 1                 | Rem1    | 366232 | 1,00 | up   |
| 6192666 | 7233970 | 1458269 | RAS (RAD and GEM)-like GTP-binding 1                 | Rem1    | 366232 | 1,00 | down |
| 6349582 | 7233970 | 1458271 | RAS (RAD and GEM)-like GTP-binding 1                 | Rem1    | 366232 | 1,04 | up   |
| 6620087 | 7233970 | 1458272 | RAS (RAD and GEM)-like GTP-binding 1                 | Rem1    | 366232 | 1,00 | up   |
| 6683517 | 7233970 | 1458275 | RAS (RAD and GEM)-like GTP-binding 1                 | Rem1    | 366232 | 1,12 | down |
| 5798235 | 7233425 | 1456803 | Ras and Rab interactor 2                             | Rin2    | 311494 | 1,14 | up   |
| 5864893 | 7233425 | 1456776 | Ras and Rab interactor 2                             | Rin2    | 311494 | 1,28 | up   |
| 6034277 | 7233425 | 1456785 | Ras and Rab interactor 2                             | Rin2    | 311494 | 1,05 | down |
| 6035261 | 7233425 | 1456803 | Ras and Rab interactor 2                             | Rin2    | 311494 | 1,03 | up   |
| 6092243 | 7233425 | 1456761 | Ras and Rab interactor 2                             | Rin2    | 311494 | 1,71 | up   |
| 6117904 | 7233425 | 1456781 | Ras and Rab interactor 2                             | Rin2    | 311494 | 1,19 | up   |
| 6166842 | 7233425 | 1456798 | Ras and Rab interactor 2                             | Rin2    | 311494 | 1,04 | down |
| 6237996 | 7233425 | 1456792 | Ras and Rab interactor 2                             | Rin2    | 311494 | 1,01 | up   |
| 6261776 | 7233425 | 1456789 | Ras and Rab interactor 2                             | Rin2    | 311494 | 1,19 | down |
| 6282000 | 7233425 | 1456801 | Ras and Rab interactor 2                             | Rin2    | 311494 | 1,40 | down |
| 6385925 | 7233425 | 1456800 | Ras and Rab interactor 2                             | Rin2    | 311494 | 1,07 | down |
| 6394816 | 7233425 | 1456792 | Ras and Rab interactor 2                             | Rin2    | 311494 | 1,06 | up   |
| 6446087 | 7233425 | 1456786 | Ras and Rab interactor 2                             | Rin2    | 311494 | 1,37 | up   |
| 6469268 | 7233425 | 1456792 | Ras and Rab interactor 2                             | Rin2    | 311494 | 1,05 | down |
| 5659429 | 7268736 | 1544319 | Ras association (RalGDS/AF-6) domain family member 4 | Rassf4  | 362423 | 1,01 | down |
| 5702858 | 7268736 | 1544317 | Ras association (RalGDS/AF-6) domain family member 4 | Rassf4  | 362423 | 1,36 | up   |
| 5711563 | 7268736 | 1544326 | Ras association (RalGDS/AF-6) domain family member 4 | Rassf4  | 362423 | 1,15 | down |
| 5725678 | 7268736 | 1544324 | Ras association (RalGDS/AF-6) domain family member 4 | Rassf4  | 362423 | 1,24 | up   |
| 5749706 | 7268736 | 1544321 | Ras association (RalGDS/AF-6) domain family member 4 | Rassf4  | 362423 | 1,25 | up   |

|         |         |         |                                                      |          |        |      |      |
|---------|---------|---------|------------------------------------------------------|----------|--------|------|------|
| 5979340 | 7268736 | 1544316 | Ras association (RalGDS/AF-6) domain family member 4 | Rassf4   | 362423 | 1,69 | up   |
| 6084485 | 7268736 | 1544323 | Ras association (RalGDS/AF-6) domain family member 4 | Rassf4   | 362423 | 1,01 | down |
| 6131234 | 7268736 | 1544320 | Ras association (RalGDS/AF-6) domain family member 4 | Rassf4   | 362423 | 1,08 | up   |
| 6530574 | 7268736 | 1544327 | Ras association (RalGDS/AF-6) domain family member 4 | Rassf4   | 362423 | 2,00 | down |
| 6566916 | 7268736 | 1544318 | Ras association (RalGDS/AF-6) domain family member 4 | Rassf4   | 362423 | 1,00 | up   |
| 6581563 | 7268736 | 1544322 | Ras association (RalGDS/AF-6) domain family member 4 | Rassf4   | 362423 | 1,15 | down |
| 5799727 | 7059563 | 1030493 | ras homolog gene family, member D                    | Rhod     | 293660 | 1,16 | up   |
| 5831529 | 7059563 | 1030494 | ras homolog gene family, member D                    | Rhod     | 293660 | 2,18 | up   |
| 6330978 | 7059563 | 1030493 | ras homolog gene family, member D                    | Rhod     | 293660 | 1,42 | up   |
| 6453159 | 7059563 | 1030497 | ras homolog gene family, member D                    | Rhod     | 293660 | 1,32 | down |
| 6511542 | 7059563 | 1030492 | ras homolog gene family, member D                    | Rhod     | 293660 | 1,31 | down |
| 6577947 | 7059563 | 1030496 | ras homolog gene family, member D                    | Rhod     | 293660 | 1,25 | up   |
| 6590661 | 7059563 | 1030495 | ras homolog gene family, member D                    | Rhod     | 293660 | 2,13 | up   |
| 5687446 | 7178979 | 1322366 | RASD family, member 2                                | Rasd2    | 171099 | 1,15 | down |
| 5730374 | 7178979 | 1322367 | RASD family, member 2                                | Rasd2    | 171099 | 1,98 | up   |
| 5783219 | 7178979 | 1322366 | RASD family, member 2                                | Rasd2    | 171099 | 1,08 | up   |
| 5887402 | 7178979 | 1322369 | RASD family, member 2                                | Rasd2    | 171099 | 1,58 | down |
| 5979301 | 7178979 | 1322366 | RASD family, member 2                                | Rasd2    | 171099 | 2,53 | up   |
| 6215296 | 7178979 | 1322365 | RASD family, member 2                                | Rasd2    | 171099 | 1,35 | down |
| 6246887 | 7178979 | 1322364 | RASD family, member 2                                | Rasd2    | 171099 | 1,90 | down |
| 6518983 | 7178979 | 1322369 | RASD family, member 2                                | Rasd2    | 171099 | 1,14 | down |
| 6586578 | 7178979 | 1322368 | RASD family, member 2                                | Rasd2    | 171099 | 1,26 | up   |
| 6596264 | 7178979 | 1322369 | RASD family, member 2                                | Rasd2    | 171099 | 2,18 | up   |
| 5779699 | 7067212 | 1049215 | RasGEF domain family, member 1C                      | Rasgef1c | 360519 | 1,60 | down |
| 5875160 | 7067212 | 1049226 | RasGEF domain family, member 1C                      | Rasgef1c | 360519 | 1,38 | up   |
| 5934545 | 7067212 | 1049217 | RasGEF domain family, member 1C                      | Rasgef1c | 360519 | 1,74 | down |
| 6122569 | 7067212 | 1049199 | RasGEF domain family, member 1C                      | Rasgef1c | 360519 | 1,25 | up   |
| 6164694 | 7067212 | 1049218 | RasGEF domain family, member 1C                      | Rasgef1c | 360519 | 2,35 | down |
| 6220293 | 7067212 | 1049225 | RasGEF domain family, member 1C                      | Rasgef1c | 360519 | 1,27 | up   |
| 6303687 | 7067212 | 1049223 | RasGEF domain family, member 1C                      | Rasgef1c | 360519 | 1,72 | down |
| 6413529 | 7067212 | 1049228 | RasGEF domain family, member 1C                      | Rasgef1c | 360519 | 1,90 | up   |
| 6498632 | 7067212 | 1049219 | RasGEF domain family, member 1C                      | Rasgef1c | 360519 | 1,21 | down |
| 6550785 | 7067212 | 1049224 | RasGEF domain family, member 1C                      | Rasgef1c | 360519 | 1,05 | down |
| 6577227 | 7067212 | 1049216 | RasGEF domain family, member 1C                      | Rasgef1c | 360519 | 1,16 | down |
| 6590015 | 7067212 | 1049220 | RasGEF domain family, member 1C                      | Rasgef1c | 360519 | 1,16 | down |
| 6665814 | 7067212 | 1049222 | RasGEF domain family, member 1C                      | Rasgef1c | 360519 | 1,02 | down |
| 6712887 | 7067212 | 1049227 | RasGEF domain family, member 1C                      | Rasgef1c | 360519 | 1,23 | up   |
| 6724139 | 7067212 | 1049222 | RasGEF domain family, member 1C                      | Rasgef1c | 360519 | 1,27 | down |
| 5843089 | 7174098 | 1310345 | Ras-like without CAAX 2                              | Rit2     | 291713 | 1,45 | down |
| 6028755 | 7174098 | 1310350 | Ras-like without CAAX 2                              | Rit2     | 291713 | 1,43 | up   |
| 6153610 | 7174098 | 1310346 | Ras-like without CAAX 2                              | Rit2     | 291713 | 1,88 | down |
| 6310655 | 7174098 | 1310347 | Ras-like without CAAX 2                              | Rit2     | 291713 | 1,52 | down |
| 6417458 | 7174098 | 1310350 | Ras-like without CAAX 2                              | Rit2     | 291713 | 1,15 | up   |
| 6451457 | 7174098 | 1310348 | Ras-like without CAAX 2                              | Rit2     | 291713 | 2,16 | up   |
| 6456964 | 7174098 | 1310349 | Ras-like without CAAX 2                              | Rit2     | 291713 | 1,10 | down |
| 6420523 | 7070455 | 1057352 | RAS-like, family 10, member B                        | Rasl10b  | 303382 | 1,06 | up   |
| 6600115 | 7070455 | 1057346 | RAS-like, family 10, member B                        | Rasl10b  | 303382 | 1,12 | up   |
| 5640511 | 7279303 | 1571218 | Ras-related GTP binding C                            | Rragc    | 298514 | 1,16 | up   |
| 5692121 | 7279303 | 1571209 | Ras-related GTP binding C                            | Rragc    | 298514 | 1,50 | up   |
| 5856509 | 7279303 | 1571213 | Ras-related GTP binding C                            | Rragc    | 298514 | 1,03 | up   |
| 5867807 | 7279303 | 1571215 | Ras-related GTP binding C                            | Rragc    | 298514 | 1,32 | up   |
| 6041540 | 7279303 | 1571214 | Ras-related GTP binding C                            | Rragc    | 298514 | 1,26 | up   |
| 6087042 | 7279303 | 1571218 | Ras-related GTP binding C                            | Rragc    | 298514 | 1,44 | up   |
| 6292097 | 7279303 | 1571218 | Ras-related GTP binding C                            | Rragc    | 298514 | 1,06 | up   |
| 6312125 | 7279303 | 1571218 | Ras-related GTP binding C                            | Rragc    | 298514 | 1,05 | up   |
| 6405068 | 7279303 | 1571217 | Ras-related GTP binding C                            | Rragc    | 298514 | 1,36 | up   |

|         |         |         |                                                         |       |        |      |      |
|---------|---------|---------|---------------------------------------------------------|-------|--------|------|------|
| 6550334 | 7279303 | 1571211 | Ras-related GTP binding C                               | Rragc | 298514 | 1,22 | up   |
| 6689577 | 7279303 | 1571216 | Ras-related GTP binding C                               | Rragc | 298514 | 1,67 | up   |
| 5782950 | 7059584 | 1030542 | RCE1 homolog, prenyl protein peptidase (S. cerevisiae)  | Rce1  | 309153 | 1,01 | down |
| 5967938 | 7059584 | 1030543 | RCE1 homolog, prenyl protein peptidase (S. cerevisiae)  | Rce1  | 309153 | 1,19 | up   |
| 5985690 | 7059584 | 1030542 | RCE1 homolog, prenyl protein peptidase (S. cerevisiae)  | Rce1  | 309153 | 1,13 | up   |
| 6002591 | 7059584 | 1030546 | RCE1 homolog, prenyl protein peptidase (S. cerevisiae)  | Rce1  | 309153 | 1,30 | up   |
| 6006886 | 7059584 | 1030542 | RCE1 homolog, prenyl protein peptidase (S. cerevisiae)  | Rce1  | 309153 | 1,61 | up   |
| 6073745 | 7059584 | 1030544 | RCE1 homolog, prenyl protein peptidase (S. cerevisiae)  | Rce1  | 309153 | 1,33 | up   |
| 6090935 | 7059584 | 1030545 | RCE1 homolog, prenyl protein peptidase (S. cerevisiae)  | Rce1  | 309153 | 1,27 | up   |
| 6180978 | 7059584 | 1030543 | RCE1 homolog, prenyl protein peptidase (S. cerevisiae)  | Rce1  | 309153 | 1,06 | up   |
| 6367945 | 7059584 | 1030542 | RCE1 homolog, prenyl protein peptidase (S. cerevisiae)  | Rce1  | 309153 | 1,17 | up   |
| 6578463 | 7059584 | 1030546 | RCE1 homolog, prenyl protein peptidase (S. cerevisiae)  | Rce1  | 309153 | 1,05 | up   |
| 6704144 | 7059584 | 1030546 | RCE1 homolog, prenyl protein peptidase (S. cerevisiae)  | Rce1  | 309153 | 1,41 | up   |
| 5646349 | 7131971 | 1206223 | REC8 homolog (yeast)                                    | Rec8  | 290227 | 1,10 | up   |
| 5687248 | 7131971 | 1206212 | REC8 homolog (yeast)                                    | Rec8  | 290227 | 1,19 | down |
| 5721411 | 7131971 | 1206213 | REC8 homolog (yeast)                                    | Rec8  | 290227 | 1,02 | down |
| 5750053 | 7131971 | 1206217 | REC8 homolog (yeast)                                    | Rec8  | 290227 | 2,09 | up   |
| 5753983 | 7131971 | 1206230 | REC8 homolog (yeast)                                    | Rec8  | 290227 | 1,28 | up   |
| 5850084 | 7131971 | 1206218 | REC8 homolog (yeast)                                    | Rec8  | 290227 | 1,01 | up   |
| 6035893 | 7131971 | 1206215 | REC8 homolog (yeast)                                    | Rec8  | 290227 | 1,06 | down |
| 6059923 | 7131971 | 1206225 | REC8 homolog (yeast)                                    | Rec8  | 290227 | 1,08 | up   |
| 6182298 | 7131971 | 1206221 | REC8 homolog (yeast)                                    | Rec8  | 290227 | 1,27 | down |
| 6218749 | 7131971 | 1206216 | REC8 homolog (yeast)                                    | Rec8  | 290227 | 1,26 | down |
| 6223164 | 7131971 | 1206228 | REC8 homolog (yeast)                                    | Rec8  | 290227 | 1,48 | down |
| 6251873 | 7131971 | 1206220 | REC8 homolog (yeast)                                    | Rec8  | 290227 | 1,03 | down |
| 6458392 | 7131971 | 1206218 | REC8 homolog (yeast)                                    | Rec8  | 290227 | 1,20 | up   |
| 6515818 | 7131971 | 1206217 | REC8 homolog (yeast)                                    | Rec8  | 290227 | 1,02 | up   |
| 6523908 | 7131971 | 1206226 | REC8 homolog (yeast)                                    | Rec8  | 290227 | 1,96 | down |
| 6525864 | 7131971 | 1206230 | REC8 homolog (yeast)                                    | Rec8  | 290227 | 1,20 | down |
| 6543933 | 7131971 | 1206219 | REC8 homolog (yeast)                                    | Rec8  | 290227 | 1,65 | up   |
| 6588089 | 7131971 | 1206214 | REC8 homolog (yeast)                                    | Rec8  | 290227 | 1,16 | up   |
| 6649175 | 7131971 | 1206227 | REC8 homolog (yeast)                                    | Rec8  | 290227 | 1,46 | down |
| 6656416 | 7131971 | 1206211 | REC8 homolog (yeast)                                    | Rec8  | 290227 | 1,80 | up   |
| 6658185 | 7131971 | 1206229 | REC8 homolog (yeast)                                    | Rec8  | 290227 | 1,32 | down |
| 6671019 | 7131971 | 1206211 | REC8 homolog (yeast)                                    | Rec8  | 290227 | 1,89 | down |
| 6672327 | 7131971 | 1206222 | REC8 homolog (yeast)                                    | Rec8  | 290227 | 1,07 | up   |
| 6691016 | 7131971 | 1206224 | REC8 homolog (yeast)                                    | Rec8  | 290227 | 1,22 | down |
| 5734132 | 7094771 | 1114515 | receptor (chemosensory) transporter protein 4           | Rtp4  | 360733 | 1,69 | down |
| 6105976 | 7094771 | 1114511 | receptor (chemosensory) transporter protein 4           | Rtp4  | 360733 | 1,10 | down |
| 6152991 | 7094771 | 1114511 | receptor (chemosensory) transporter protein 4           | Rtp4  | 360733 | 1,12 | down |
| 6210979 | 7094771 | 1114514 | receptor (chemosensory) transporter protein 4           | Rtp4  | 360733 | 1,23 | down |
| 6262832 | 7094771 | 1114510 | receptor (chemosensory) transporter protein 4           | Rtp4  | 360733 | 3,33 | down |
| 6590933 | 7094771 | 1114512 | receptor (chemosensory) transporter protein 4           | Rtp4  | 360733 | 2,04 | up   |
| 6625133 | 7094771 | 1114512 | receptor (chemosensory) transporter protein 4           | Rtp4  | 360733 | 3,53 | up   |
| 5784930 | 7163892 | 1284205 | receptor (TNFRSF)-interacting serine-threonine kinase 1 | Ripk1 | 306886 | 1,23 | up   |
| 5816297 | 7163892 | 1284207 | receptor (TNFRSF)-interacting serine-threonine kinase 1 | Ripk1 | 306886 | 1,06 | down |
| 5927050 | 7163892 | 1284208 | receptor (TNFRSF)-interacting serine-threonine kinase 1 | Ripk1 | 306886 | 1,11 | down |
| 5990737 | 7163892 | 1284214 | receptor (TNFRSF)-interacting serine-threonine kinase 1 | Ripk1 | 306886 | 1,09 | up   |
| 6028181 | 7163892 | 1284205 | receptor (TNFRSF)-interacting serine-threonine kinase 1 | Ripk1 | 306886 | 1,62 | up   |
| 6035532 | 7163892 | 1284206 | receptor (TNFRSF)-interacting serine-threonine kinase 1 | Ripk1 | 306886 | 1,36 | up   |
| 6091428 | 7163892 | 1284205 | receptor (TNFRSF)-interacting serine-threonine kinase 1 | Ripk1 | 306886 | 1,05 | down |
| 6102779 | 7163892 | 1284206 | receptor (TNFRSF)-interacting serine-threonine kinase 1 | Ripk1 | 306886 | 1,10 | down |
| 6107295 | 7163892 | 1284208 | receptor (TNFRSF)-interacting serine-threonine kinase 1 | Ripk1 | 306886 | 1,21 | up   |
| 6213775 | 7163892 | 1284217 | receptor (TNFRSF)-interacting serine-threonine kinase 1 | Ripk1 | 306886 | 1,20 | up   |
| 6266550 | 7163892 | 1284211 | receptor (TNFRSF)-interacting serine-threonine kinase 1 | Ripk1 | 306886 | 1,45 | down |
| 6267050 | 7163892 | 1284212 | receptor (TNFRSF)-interacting serine-threonine kinase 1 | Ripk1 | 306886 | 1,03 | down |

|         |         |         |                                                         |       |        |      |      |
|---------|---------|---------|---------------------------------------------------------|-------|--------|------|------|
| 6289009 | 7163892 | 1284213 | receptor (TNFRSF)-interacting serine-threonine kinase 1 | Ripk1 | 306886 | 1,09 | up   |
| 6313681 | 7163892 | 1284214 | receptor (TNFRSF)-interacting serine-threonine kinase 1 | Ripk1 | 306886 | 1,04 | up   |
| 6404740 | 7163892 | 1284208 | receptor (TNFRSF)-interacting serine-threonine kinase 1 | Ripk1 | 306886 | 1,02 | down |
| 6407078 | 7163892 | 1284217 | receptor (TNFRSF)-interacting serine-threonine kinase 1 | Ripk1 | 306886 | 1,10 | up   |
| 6498751 | 7163892 | 1284205 | receptor (TNFRSF)-interacting serine-threonine kinase 1 | Ripk1 | 306886 | 1,95 | down |
| 6557313 | 7163892 | 1284205 | receptor (TNFRSF)-interacting serine-threonine kinase 1 | Ripk1 | 306886 | 1,15 | down |
| 6581673 | 7163892 | 1284216 | receptor (TNFRSF)-interacting serine-threonine kinase 1 | Ripk1 | 306886 | 1,99 | up   |
| 6584181 | 7163892 | 1284209 | receptor (TNFRSF)-interacting serine-threonine kinase 1 | Ripk1 | 306886 | 1,10 | down |
| 5806559 | 7133181 | 1209153 | receptor accessory protein 4                            | Reep4 | 306014 | 1,16 | up   |
| 6056075 | 7133181 | 1209156 | receptor accessory protein 4                            | Reep4 | 306014 | 1,13 | up   |
| 6138939 | 7133181 | 1209158 | receptor accessory protein 4                            | Reep4 | 306014 | 2,64 | down |
| 6161908 | 7133181 | 1209157 | receptor accessory protein 4                            | Reep4 | 306014 | 1,37 | up   |
| 6182303 | 7133181 | 1209154 | receptor accessory protein 4                            | Reep4 | 306014 | 1,04 | down |
| 6250143 | 7133181 | 1209152 | receptor accessory protein 4                            | Reep4 | 306014 | 1,26 | up   |
| 6692966 | 7133181 | 1209155 | receptor accessory protein 4                            | Reep4 | 306014 | 1,24 | down |
| 6733890 | 7133181 | 1209158 | receptor accessory protein 4                            | Reep4 | 306014 | 1,45 | down |
| 5783638 | 7229909 | 1447250 | receptor-associated protein of the synapse              | Rapsn | 362161 | 1,25 | up   |
| 6005716 | 7229909 | 1447249 | receptor-associated protein of the synapse              | Rapsn | 362161 | 1,16 | down |
| 6036733 | 7229909 | 1447254 | receptor-associated protein of the synapse              | Rapsn | 362161 | 1,15 | up   |
| 6037328 | 7229909 | 1447253 | receptor-associated protein of the synapse              | Rapsn | 362161 | 1,13 | up   |
| 6135223 | 7229909 | 1447245 | receptor-associated protein of the synapse              | Rapsn | 362161 | 2,04 | down |
| 6368931 | 7229909 | 1447251 | receptor-associated protein of the synapse              | Rapsn | 362161 | 2,04 | up   |
| 6476225 | 7229909 | 1447246 | receptor-associated protein of the synapse              | Rapsn | 362161 | 1,29 | up   |
| 6652613 | 7229909 | 1447252 | receptor-associated protein of the synapse              | Rapsn | 362161 | 1,08 | up   |
| 5688986 | 7284153 | 1583006 | receptor-interacting serine-threonine kinase 2          | Ripk2 | 362491 | 1,44 | up   |
| 5840244 | 7284153 | 1583006 | receptor-interacting serine-threonine kinase 2          | Ripk2 | 362491 | 2,15 | down |
| 6028851 | 7284153 | 1583015 | receptor-interacting serine-threonine kinase 2          | Ripk2 | 362491 | 1,06 | up   |
| 6142471 | 7284153 | 1583016 | receptor-interacting serine-threonine kinase 2          | Ripk2 | 362491 | 1,52 | down |
| 6488027 | 7284153 | 1583005 | receptor-interacting serine-threonine kinase 2          | Ripk2 | 362491 | 1,10 | down |
| 6493593 | 7284153 | 1583010 | receptor-interacting serine-threonine kinase 2          | Ripk2 | 362491 | 1,15 | up   |
| 6526828 | 7284153 | 1583003 | receptor-interacting serine-threonine kinase 2          | Ripk2 | 362491 | 1,14 | down |
| 6531710 | 7284153 | 1583012 | receptor-interacting serine-threonine kinase 2          | Ripk2 | 362491 | 1,45 | down |
| 6553907 | 7284153 | 1583013 | receptor-interacting serine-threonine kinase 2          | Ripk2 | 362491 | 1,31 | up   |
| 6633117 | 7284153 | 1583004 | receptor-interacting serine-threonine kinase 2          | Ripk2 | 362491 | 1,45 | down |
| 6705683 | 7284153 | 1583008 | receptor-interacting serine-threonine kinase 2          | Ripk2 | 362491 | 1,27 | up   |
| 5631052 | 7270920 | 1549554 | RecQ protein-like (DNA helicase Q1-like)                | Recq1 | 312824 | 1,93 | down |
| 5909909 | 7270920 | 1549552 | RecQ protein-like (DNA helicase Q1-like)                | Recq1 | 312824 | 1,11 | down |
| 5945650 | 7270920 | 1549553 | RecQ protein-like (DNA helicase Q1-like)                | Recq1 | 312824 | 2,25 | down |
| 5976661 | 7270920 | 1549561 | RecQ protein-like (DNA helicase Q1-like)                | Recq1 | 312824 | 1,18 | up   |
| 6023607 | 7270920 | 1549554 | RecQ protein-like (DNA helicase Q1-like)                | Recq1 | 312824 | 1,30 | up   |
| 6066611 | 7270920 | 1549563 | RecQ protein-like (DNA helicase Q1-like)                | Recq1 | 312824 | 1,02 | up   |
| 6110592 | 7270920 | 1549558 | RecQ protein-like (DNA helicase Q1-like)                | Recq1 | 312824 | 1,07 | down |
| 6118811 | 7270920 | 1549556 | RecQ protein-like (DNA helicase Q1-like)                | Recq1 | 312824 | 1,16 | up   |
| 6162162 | 7270920 | 1549557 | RecQ protein-like (DNA helicase Q1-like)                | Recq1 | 312824 | 1,03 | down |
| 6244264 | 7270920 | 1549559 | RecQ protein-like (DNA helicase Q1-like)                | Recq1 | 312824 | 1,05 | down |
| 6309848 | 7270920 | 1549565 | RecQ protein-like (DNA helicase Q1-like)                | Recq1 | 312824 | 1,06 | up   |
| 6375699 | 7270920 | 1549567 | RecQ protein-like (DNA helicase Q1-like)                | Recq1 | 312824 | 1,05 | up   |
| 6462219 | 7270920 | 1549562 | RecQ protein-like (DNA helicase Q1-like)                | Recq1 | 312824 | 1,05 | down |
| 6530003 | 7270920 | 1549564 | RecQ protein-like (DNA helicase Q1-like)                | Recq1 | 312824 | 1,42 | up   |
| 6547352 | 7270920 | 1549560 | RecQ protein-like (DNA helicase Q1-like)                | Recq1 | 312824 | 1,47 | up   |
| 6586302 | 7270920 | 1549552 | RecQ protein-like (DNA helicase Q1-like)                | Recq1 | 312824 | 1,21 | up   |
| 6673818 | 7270920 | 1549555 | RecQ protein-like (DNA helicase Q1-like)                | Recq1 | 312824 | 1,28 | up   |
| 6714746 | 7270920 | 1549566 | RecQ protein-like (DNA helicase Q1-like)                | Recq1 | 312824 | 1,08 | down |
| 6745100 | 7270920 | 1549566 | RecQ protein-like (DNA helicase Q1-like)                | Recq1 | 312824 | 1,52 | up   |
| 5715654 | 7230611 | 1448810 | regeneration associated muscle protease                 | Ramp  | 311252 | 1,19 | down |
| 5717259 | 7230611 | 1448813 | regeneration associated muscle protease                 | Ramp  | 311252 | 1,11 | up   |



|         |         |         |                                                                            |        |        |      |      |
|---------|---------|---------|----------------------------------------------------------------------------|--------|--------|------|------|
| 5814825 | 7230611 | 1448814 | regeneration associated muscle protease                                    | Ramp   | 311252 | 1,11 | down |
| 6142710 | 7230611 | 1448808 | regeneration associated muscle protease                                    | Ramp   | 311252 | 1,32 | up   |
| 6166637 | 7230611 | 1448820 | regeneration associated muscle protease                                    | Ramp   | 311252 | 1,17 | up   |
| 6205698 | 7230611 | 1448801 | regeneration associated muscle protease                                    | Ramp   | 311252 | 1,18 | down |
| 6240919 | 7230611 | 1448816 | regeneration associated muscle protease                                    | Ramp   | 311252 | 1,91 | down |
| 6481927 | 7230611 | 1448820 | regeneration associated muscle protease                                    | Ramp   | 311252 | 1,12 | down |
| 6511703 | 7230611 | 1448801 | regeneration associated muscle protease                                    | Ramp   | 311252 | 1,10 | up   |
| 5635106 | 7360353 | 1770625 | regulating synaptic membrane exocytosis 1                                  | Rims1  | 84556  | 1,18 | down |
| 5658839 | 7360353 | 1770614 | regulating synaptic membrane exocytosis 1                                  | Rims1  | 84556  | 1,17 | up   |
| 5659513 | 7360353 | 1770607 | regulating synaptic membrane exocytosis 1                                  | Rims1  | 84556  | 1,21 | up   |
| 5676767 | 7360353 | 1770631 | regulating synaptic membrane exocytosis 1                                  | Rims1  | 84556  | 1,06 | down |
| 5682143 | 7360353 | 1770606 | regulating synaptic membrane exocytosis 1                                  | Rims1  | 84556  | 1,46 | up   |
| 5735861 | 7360353 | 1770631 | regulating synaptic membrane exocytosis 1                                  | Rims1  | 84556  | 1,15 | down |
| 5751282 | 7360353 | 1770612 | regulating synaptic membrane exocytosis 1                                  | Rims1  | 84556  | 1,12 | up   |
| 5760281 | 7360353 | 1770618 | regulating synaptic membrane exocytosis 1                                  | Rims1  | 84556  | 1,24 | up   |
| 5764028 | 7360353 | 1770617 | regulating synaptic membrane exocytosis 1                                  | Rims1  | 84556  | 1,01 | down |
| 5814916 | 7360353 | 1770619 | regulating synaptic membrane exocytosis 1                                  | Rims1  | 84556  | 1,15 | up   |
| 5840365 | 7360353 | 1770636 | regulating synaptic membrane exocytosis 1                                  | Rims1  | 84556  | 1,04 | up   |
| 5865739 | 7360353 | 1770605 | regulating synaptic membrane exocytosis 1                                  | Rims1  | 84556  | 1,02 | down |
| 5880890 | 7360353 | 1770609 | regulating synaptic membrane exocytosis 1                                  | Rims1  | 84556  | 1,48 | up   |
| 5982442 | 7360353 | 1770626 | regulating synaptic membrane exocytosis 1                                  | Rims1  | 84556  | 1,09 | up   |
| 6046129 | 7360353 | 1770629 | regulating synaptic membrane exocytosis 1                                  | Rims1  | 84556  | 1,18 | down |
| 6076866 | 7360353 | 1770627 | regulating synaptic membrane exocytosis 1                                  | Rims1  | 84556  | 1,31 | up   |
| 6087345 | 7360353 | 1770608 | regulating synaptic membrane exocytosis 1                                  | Rims1  | 84556  | 1,20 | up   |
| 6119039 | 7360353 | 1770636 | regulating synaptic membrane exocytosis 1                                  | Rims1  | 84556  | 1,20 | down |
| 6191854 | 7360353 | 1770631 | regulating synaptic membrane exocytosis 1                                  | Rims1  | 84556  | 1,05 | down |
| 6233945 | 7360353 | 1770605 | regulating synaptic membrane exocytosis 1                                  | Rims1  | 84556  | 1,03 | up   |
| 6288902 | 7360353 | 1770635 | regulating synaptic membrane exocytosis 1                                  | Rims1  | 84556  | 1,47 | up   |
| 6303066 | 7360353 | 1770636 | regulating synaptic membrane exocytosis 1                                  | Rims1  | 84556  | 1,00 | up   |
| 6349688 | 7360353 | 1770628 | regulating synaptic membrane exocytosis 1                                  | Rims1  | 84556  | 1,01 | down |
| 6384099 | 7360353 | 1770634 | regulating synaptic membrane exocytosis 1                                  | Rims1  | 84556  | 1,51 | down |
| 6485361 | 7360353 | 1770615 | regulating synaptic membrane exocytosis 1                                  | Rims1  | 84556  | 1,38 | up   |
| 6487417 | 7360353 | 1770624 | regulating synaptic membrane exocytosis 1                                  | Rims1  | 84556  | 1,15 | up   |
| 6499508 | 7360353 | 1770623 | regulating synaptic membrane exocytosis 1                                  | Rims1  | 84556  | 1,01 | down |
| 6501725 | 7360353 | 1770620 | regulating synaptic membrane exocytosis 1                                  | Rims1  | 84556  | 1,04 | down |
| 6516005 | 7360353 | 1770611 | regulating synaptic membrane exocytosis 1                                  | Rims1  | 84556  | 1,46 | down |
| 6536297 | 7360353 | 1770632 | regulating synaptic membrane exocytosis 1                                  | Rims1  | 84556  | 1,11 | down |
| 6551508 | 7360353 | 1770633 | regulating synaptic membrane exocytosis 1                                  | Rims1  | 84556  | 1,15 | up   |
| 6579605 | 7360353 | 1770630 | regulating synaptic membrane exocytosis 1                                  | Rims1  | 84556  | 1,17 | up   |
| 6582015 | 7360353 | 1770610 | regulating synaptic membrane exocytosis 1                                  | Rims1  | 84556  | 2,30 | down |
| 6633233 | 7360353 | 1770622 | regulating synaptic membrane exocytosis 1                                  | Rims1  | 84556  | 1,30 | down |
| 6649481 | 7360353 | 1770628 | regulating synaptic membrane exocytosis 1                                  | Rims1  | 84556  | 1,05 | down |
| 6668952 | 7360353 | 1770616 | regulating synaptic membrane exocytosis 1                                  | Rims1  | 84556  | 1,04 | down |
| 6703920 | 7360353 | 1770621 | regulating synaptic membrane exocytosis 1                                  | Rims1  | 84556  | 1,02 | up   |
| 6715368 | 7360353 | 1770613 | regulating synaptic membrane exocytosis 1                                  | Rims1  | 84556  | 1,05 | up   |
| 5763504 | 7359874 | 1769345 | regulator of calcineurin 2                                                 | Rcan2  | 140666 | 1,24 | up   |
| 5933795 | 7359874 | 1769349 | regulator of calcineurin 2                                                 | Rcan2  | 140666 | 1,12 | up   |
| 5974481 | 7359874 | 1769350 | regulator of calcineurin 2                                                 | Rcan2  | 140666 | 2,38 | up   |
| 6330213 | 7359874 | 1769346 | regulator of calcineurin 2                                                 | Rcan2  | 140666 | 1,02 | up   |
| 6541459 | 7359874 | 1769347 | regulator of calcineurin 2                                                 | Rcan2  | 140666 | 1,11 | up   |
| 6709062 | 7359874 | 1769344 | regulator of calcineurin 2                                                 | Rcan2  | 140666 | 1,43 | up   |
| 5645356 | 7133349 | 1209572 | regulator of chromosome condensation (RCC1) and BTB (POZ) domain containin | Rcbtb2 | 290363 | 1,40 | up   |
| 5661287 | 7133349 | 1209573 | regulator of chromosome condensation (RCC1) and BTB (POZ) domain containin | Rcbtb2 | 290363 | 1,03 | down |
| 5752963 | 7133349 | 1209576 | regulator of chromosome condensation (RCC1) and BTB (POZ) domain containin | Rcbtb2 | 290363 | 1,30 | down |
| 5820918 | 7133349 | 1209564 | regulator of chromosome condensation (RCC1) and BTB (POZ) domain containin | Rcbtb2 | 290363 | 2,19 | down |
| 5885216 | 7133349 | 1209565 | regulator of chromosome condensation (RCC1) and BTB (POZ) domain containin | Rcbtb2 | 290363 | 1,65 | up   |

|         |         |         |                                                                            |        |        |      |      |
|---------|---------|---------|----------------------------------------------------------------------------|--------|--------|------|------|
| 5942952 | 7133349 | 1209571 | regulator of chromosome condensation (RCC1) and BTB (POZ) domain containin | Rcbtb2 | 290363 | 1,73 | up   |
| 6005995 | 7133349 | 1209567 | regulator of chromosome condensation (RCC1) and BTB (POZ) domain containin | Rcbtb2 | 290363 | 1,18 | down |
| 6020989 | 7133349 | 1209567 | regulator of chromosome condensation (RCC1) and BTB (POZ) domain containin | Rcbtb2 | 290363 | 1,16 | up   |
| 6075574 | 7133349 | 1209566 | regulator of chromosome condensation (RCC1) and BTB (POZ) domain containin | Rcbtb2 | 290363 | 1,26 | up   |
| 6267247 | 7133349 | 1209569 | regulator of chromosome condensation (RCC1) and BTB (POZ) domain containin | Rcbtb2 | 290363 | 1,46 | up   |
| 6281518 | 7133349 | 1209570 | regulator of chromosome condensation (RCC1) and BTB (POZ) domain containin | Rcbtb2 | 290363 | 1,03 | down |
| 6281947 | 7133349 | 1209575 | regulator of chromosome condensation (RCC1) and BTB (POZ) domain containin | Rcbtb2 | 290363 | 1,16 | down |
| 6314137 | 7133349 | 1209568 | regulator of chromosome condensation (RCC1) and BTB (POZ) domain containin | Rcbtb2 | 290363 | 1,35 | up   |
| 6573449 | 7133349 | 1209577 | regulator of chromosome condensation (RCC1) and BTB (POZ) domain containin | Rcbtb2 | 290363 | 1,08 | down |
| 6693966 | 7133349 | 1209574 | regulator of chromosome condensation (RCC1) and BTB (POZ) domain containin | Rcbtb2 | 290363 | 1,07 | down |
| 5669604 | 7106414 | 1143197 | regulator of G-protein signaling 16                                        | Rgs16  | 360857 | 1,05 | up   |
| 5826834 | 7106414 | 1143195 | regulator of G-protein signaling 16                                        | Rgs16  | 360857 | 1,05 | up   |
| 5920927 | 7106414 | 1143194 | regulator of G-protein signaling 16                                        | Rgs16  | 360857 | 1,23 | up   |
| 6506011 | 7106414 | 1143196 | regulator of G-protein signaling 16                                        | Rgs16  | 360857 | 1,15 | down |
| 5651959 | 7236395 | 1464353 | regulator of telomere elongation helicase 1                                | Rtel1  | 362288 | 1,27 | up   |
| 5656524 | 7236395 | 1464351 | regulator of telomere elongation helicase 1                                | Rtel1  | 362288 | 1,14 | down |
| 5668072 | 7236395 | 1464350 | regulator of telomere elongation helicase 1                                | Rtel1  | 362288 | 1,21 | down |
| 5702550 | 7236395 | 1464352 | regulator of telomere elongation helicase 1                                | Rtel1  | 362288 | 1,13 | down |
| 5844073 | 7236395 | 1464354 | regulator of telomere elongation helicase 1                                | Rtel1  | 362288 | 1,16 | down |
| 6040915 | 7236395 | 1464354 | regulator of telomere elongation helicase 1                                | Rtel1  | 362288 | 1,20 | up   |
| 6104826 | 7236395 | 1464349 | regulator of telomere elongation helicase 1                                | Rtel1  | 362288 | 1,06 | up   |
| 6157798 | 7236395 | 1464354 | regulator of telomere elongation helicase 1                                | Rtel1  | 362288 | 1,08 | up   |
| 6165119 | 7236395 | 1464347 | regulator of telomere elongation helicase 1                                | Rtel1  | 362288 | 1,48 | up   |
| 6178382 | 7236395 | 1464348 | regulator of telomere elongation helicase 1                                | Rtel1  | 362288 | 1,54 | up   |
| 6685157 | 7236395 | 1464346 | regulator of telomere elongation helicase 1                                | Rtel1  | 362288 | 1,49 | down |
| 5796123 | 7384985 | 1831803 | renin binding protein                                                      | Renbp  | 81759  | 2,17 | up   |
| 5954295 | 7384985 | 1831799 | renin binding protein                                                      | Renbp  | 81759  | 1,35 | down |
| 5958006 | 7384985 | 1831804 | renin binding protein                                                      | Renbp  | 81759  | 1,19 | down |
| 5997295 | 7384985 | 1831805 | renin binding protein                                                      | Renbp  | 81759  | 1,51 | up   |
| 6078741 | 7384985 | 1831797 | renin binding protein                                                      | Renbp  | 81759  | 1,18 | down |
| 6164097 | 7384985 | 1831802 | renin binding protein                                                      | Renbp  | 81759  | 1,33 | up   |
| 6208225 | 7384985 | 1831802 | renin binding protein                                                      | Renbp  | 81759  | 1,25 | down |
| 6249976 | 7384985 | 1831797 | renin binding protein                                                      | Renbp  | 81759  | 1,14 | up   |
| 6280955 | 7384985 | 1831804 | renin binding protein                                                      | Renbp  | 81759  | 1,28 | down |
| 6348878 | 7384985 | 1831798 | renin binding protein                                                      | Renbp  | 81759  | 1,26 | down |
| 6466173 | 7384985 | 1831800 | renin binding protein                                                      | Renbp  | 81759  | 1,37 | up   |
| 6482631 | 7384985 | 1831796 | renin binding protein                                                      | Renbp  | 81759  | 1,32 | down |
| 6545938 | 7384985 | 1831796 | renin binding protein                                                      | Renbp  | 81759  | 1,87 | down |
| 6566633 | 7384985 | 1831801 | renin binding protein                                                      | Renbp  | 81759  | 1,12 | down |
| 5654906 | 7301890 | 1626692 | REST corepressor 1                                                         | Rcor1  | 314458 | 1,05 | up   |
| 5944021 | 7301890 | 1626692 | REST corepressor 1                                                         | Rcor1  | 314458 | 1,24 | up   |
| 6391468 | 7301890 | 1626692 | REST corepressor 1                                                         | Rcor1  | 314458 | 1,27 | down |
| 5970076 | 7336485 | 1710685 | reticulocalbin 2, EF-hand calcium binding domain                           | Rcn2   | 29218  | 1,40 | up   |
| 6013234 | 7336485 | 1710680 | reticulocalbin 2, EF-hand calcium binding domain                           | Rcn2   | 29218  | 2,01 | down |
| 6211684 | 7336485 | 1710685 | reticulocalbin 2, EF-hand calcium binding domain                           | Rcn2   | 29218  | 1,12 | up   |
| 6386306 | 7336485 | 1710682 | reticulocalbin 2, EF-hand calcium binding domain                           | Rcn2   | 29218  | 1,29 | up   |
| 6406847 | 7336485 | 1710687 | reticulocalbin 2, EF-hand calcium binding domain                           | Rcn2   | 29218  | 1,60 | down |
| 6426951 | 7336485 | 1710680 | reticulocalbin 2, EF-hand calcium binding domain                           | Rcn2   | 29218  | 1,49 | up   |
| 6443743 | 7336485 | 1710683 | reticulocalbin 2, EF-hand calcium binding domain                           | Rcn2   | 29218  | 1,20 | up   |
| 6668941 | 7336485 | 1710686 | reticulocalbin 2, EF-hand calcium binding domain                           | Rcn2   | 29218  | 1,46 | up   |
| 6691138 | 7336485 | 1710681 | reticulocalbin 2, EF-hand calcium binding domain                           | Rcn2   | 29218  | 1,16 | down |
| 6702932 | 7336485 | 1710684 | reticulocalbin 2, EF-hand calcium binding domain                           | Rcn2   | 29218  | 1,28 | up   |
| 5631833 | 7307646 | 1641844 | reticulon 1                                                                | Rtn1   | 116644 | 1,09 | down |
| 5694248 | 7307646 | 1641850 | reticulon 1                                                                | Rtn1   | 116644 | 2,79 | up   |
| 6163574 | 7307646 | 1641844 | reticulon 1                                                                | Rtn1   | 116644 | 1,18 | down |
| 6184947 | 7307646 | 1641848 | reticulon 1                                                                | Rtn1   | 116644 | 1,04 | up   |

|         |         |         |                                                   |       |        |      |      |
|---------|---------|---------|---------------------------------------------------|-------|--------|------|------|
| 6428753 | 7307646 | 1641844 | reticulon 1                                       | Rtn1  | 116644 | 1,04 | down |
| 6486242 | 7307646 | 1641846 | reticulon 1                                       | Rtn1  | 116644 | 1,27 | down |
| 6501601 | 7307646 | 1641845 | reticulon 1                                       | Rtn1  | 116644 | 1,05 | down |
| 6511972 | 7307646 | 1641849 | reticulon 1                                       | Rtn1  | 116644 | 1,09 | down |
| 6722703 | 7307646 | 1641847 | reticulon 1                                       | Rtn1  | 116644 | 1,02 | down |
| 6743533 | 7307646 | 1641850 | reticulon 1                                       | Rtn1  | 116644 | 1,41 | up   |
| 6163011 | 7247229 | 1490534 | retinoblastoma-like 1 (p107)                      | Rbl1  | 680111 | 1,54 | down |
| 6369560 | 7247229 | 1490564 | retinoblastoma-like 1 (p107)                      | Rbl1  | 680111 | 1,66 | up   |
| 5844375 | 7183304 | 1334012 | retinoblastoma-like 2                             | Rbl2  | 81758  | 1,30 | up   |
| 5847840 | 7183304 | 1334013 | retinoblastoma-like 2                             | Rbl2  | 81758  | 1,53 | up   |
| 6012824 | 7183304 | 1334009 | retinoblastoma-like 2                             | Rbl2  | 81758  | 1,19 | up   |
| 6067456 | 7183304 | 1334004 | retinoblastoma-like 2                             | Rbl2  | 81758  | 1,49 | up   |
| 6089860 | 7183304 | 1334001 | retinoblastoma-like 2                             | Rbl2  | 81758  | 1,33 | down |
| 6097597 | 7183304 | 1334006 | retinoblastoma-like 2                             | Rbl2  | 81758  | 1,04 | down |
| 6101806 | 7183304 | 1334011 | retinoblastoma-like 2                             | Rbl2  | 81758  | 1,50 | up   |
| 6128321 | 7183304 | 1334016 | retinoblastoma-like 2                             | Rbl2  | 81758  | 1,17 | down |
| 6240106 | 7183304 | 1334015 | retinoblastoma-like 2                             | Rbl2  | 81758  | 1,03 | up   |
| 6251013 | 7183304 | 1334000 | retinoblastoma-like 2                             | Rbl2  | 81758  | 1,63 | up   |
| 6295897 | 7183304 | 1334018 | retinoblastoma-like 2                             | Rbl2  | 81758  | 1,22 | up   |
| 6336409 | 7183304 | 1333999 | retinoblastoma-like 2                             | Rbl2  | 81758  | 2,61 | up   |
| 6357103 | 7183304 | 1334017 | retinoblastoma-like 2                             | Rbl2  | 81758  | 1,76 | down |
| 6358695 | 7183304 | 1334003 | retinoblastoma-like 2                             | Rbl2  | 81758  | 1,30 | up   |
| 6360304 | 7183304 | 1334011 | retinoblastoma-like 2                             | Rbl2  | 81758  | 1,35 | down |
| 6390309 | 7183304 | 1334021 | retinoblastoma-like 2                             | Rbl2  | 81758  | 1,46 | down |
| 6428957 | 7183304 | 1334008 | retinoblastoma-like 2                             | Rbl2  | 81758  | 1,01 | down |
| 6510323 | 7183304 | 1334021 | retinoblastoma-like 2                             | Rbl2  | 81758  | 1,47 | up   |
| 6511735 | 7183304 | 1334005 | retinoblastoma-like 2                             | Rbl2  | 81758  | 1,02 | up   |
| 6513227 | 7183304 | 1334012 | retinoblastoma-like 2                             | Rbl2  | 81758  | 1,18 | down |
| 6556675 | 7183304 | 1334019 | retinoblastoma-like 2                             | Rbl2  | 81758  | 1,13 | up   |
| 6587455 | 7183304 | 1334001 | retinoblastoma-like 2                             | Rbl2  | 81758  | 1,00 | up   |
| 6604438 | 7183304 | 1333998 | retinoblastoma-like 2                             | Rbl2  | 81758  | 1,09 | up   |
| 6664234 | 7183304 | 1334014 | retinoblastoma-like 2                             | Rbl2  | 81758  | 1,02 | up   |
| 6678380 | 7183304 | 1334010 | retinoblastoma-like 2                             | Rbl2  | 81758  | 1,64 | up   |
| 6711880 | 7183304 | 1334020 | retinoblastoma-like 2                             | Rbl2  | 81758  | 1,27 | down |
| 6733164 | 7183304 | 1334007 | retinoblastoma-like 2                             | Rbl2  | 81758  | 1,13 | up   |
| 6746053 | 7183304 | 1334002 | retinoblastoma-like 2                             | Rbl2  | 81758  | 1,09 | down |
| 5689977 | 7299663 | 1620999 | retinol dehydrogenase 12 (all-trans/9-cis/11-cis) | Rdh12 | 314264 | 1,34 | up   |
| 5818774 | 7299663 | 1621000 | retinol dehydrogenase 12 (all-trans/9-cis/11-cis) | Rdh12 | 314264 | 2,02 | down |
| 5841591 | 7299663 | 1620994 | retinol dehydrogenase 12 (all-trans/9-cis/11-cis) | Rdh12 | 314264 | 1,09 | up   |
| 6099460 | 7299663 | 1621001 | retinol dehydrogenase 12 (all-trans/9-cis/11-cis) | Rdh12 | 314264 | 1,35 | down |
| 6275349 | 7299663 | 1620993 | retinol dehydrogenase 12 (all-trans/9-cis/11-cis) | Rdh12 | 314264 | 1,33 | down |
| 6288845 | 7299663 | 1620995 | retinol dehydrogenase 12 (all-trans/9-cis/11-cis) | Rdh12 | 314264 | 1,36 | down |
| 6318017 | 7299663 | 1620997 | retinol dehydrogenase 12 (all-trans/9-cis/11-cis) | Rdh12 | 314264 | 1,00 | down |
| 6434246 | 7299663 | 1621000 | retinol dehydrogenase 12 (all-trans/9-cis/11-cis) | Rdh12 | 314264 | 1,18 | down |
| 6608374 | 7299663 | 1621001 | retinol dehydrogenase 12 (all-trans/9-cis/11-cis) | Rdh12 | 314264 | 1,59 | up   |
| 5680856 | 7326322 | 1686613 | retinol dehydrogenase 7                           | Rdh7  | 360420 | 1,20 | down |
| 5697540 | 7326322 | 1686612 | retinol dehydrogenase 7                           | Rdh7  | 360420 | 2,23 | down |
| 5798478 | 7326322 | 1686609 | retinol dehydrogenase 7                           | Rdh7  | 360420 | 1,29 | up   |
| 5862623 | 7326322 | 1686608 | retinol dehydrogenase 7                           | Rdh7  | 360420 | 1,60 | up   |
| 6045396 | 7326322 | 1686613 | retinol dehydrogenase 7                           | Rdh7  | 360420 | 1,35 | down |
| 6221213 | 7326322 | 1686608 | retinol dehydrogenase 7                           | Rdh7  | 360420 | 1,31 | up   |
| 6224637 | 7326322 | 1686608 | retinol dehydrogenase 7                           | Rdh7  | 360420 | 1,03 | up   |
| 6306431 | 7326322 | 1686609 | retinol dehydrogenase 7                           | Rdh7  | 360420 | 1,14 | up   |
| 6358764 | 7326322 | 1686609 | retinol dehydrogenase 7                           | Rdh7  | 360420 | 1,75 | down |
| 6514641 | 7326322 | 1686611 | retinol dehydrogenase 7                           | Rdh7  | 360420 | 1,04 | up   |
| 6745623 | 7326322 | 1686610 | retinol dehydrogenase 7                           | Rdh7  | 360420 | 1,84 | up   |

|         |         |         |                                                            |            |        |      |      |
|---------|---------|---------|------------------------------------------------------------|------------|--------|------|------|
| 5651450 | 7274585 | 1558781 | reversion-inducing-cysteine-rich protein with kazal motifs | Reck       | 313488 | 1,04 | down |
| 5702115 | 7274585 | 1558782 | reversion-inducing-cysteine-rich protein with kazal motifs | Reck       | 313488 | 1,43 | up   |
| 5723584 | 7274585 | 1558794 | reversion-inducing-cysteine-rich protein with kazal motifs | Reck       | 313488 | 1,15 | down |
| 5769676 | 7274585 | 1558771 | reversion-inducing-cysteine-rich protein with kazal motifs | Reck       | 313488 | 1,30 | down |
| 5816464 | 7274585 | 1558783 | reversion-inducing-cysteine-rich protein with kazal motifs | Reck       | 313488 | 1,13 | up   |
| 5846257 | 7274585 | 1558788 | reversion-inducing-cysteine-rich protein with kazal motifs | Reck       | 313488 | 1,49 | up   |
| 5860755 | 7274585 | 1558786 | reversion-inducing-cysteine-rich protein with kazal motifs | Reck       | 313488 | 1,17 | down |
| 6047062 | 7274585 | 1558787 | reversion-inducing-cysteine-rich protein with kazal motifs | Reck       | 313488 | 1,02 | down |
| 6104432 | 7274585 | 1558782 | reversion-inducing-cysteine-rich protein with kazal motifs | Reck       | 313488 | 1,06 | down |
| 6159369 | 7274585 | 1558797 | reversion-inducing-cysteine-rich protein with kazal motifs | Reck       | 313488 | 1,14 | up   |
| 6175764 | 7274585 | 1558778 | reversion-inducing-cysteine-rich protein with kazal motifs | Reck       | 313488 | 1,10 | down |
| 6204305 | 7274585 | 1558774 | reversion-inducing-cysteine-rich protein with kazal motifs | Reck       | 313488 | 1,56 | down |
| 6211303 | 7274585 | 1558763 | reversion-inducing-cysteine-rich protein with kazal motifs | Reck       | 313488 | 1,93 | down |
| 6221250 | 7274585 | 1558792 | reversion-inducing-cysteine-rich protein with kazal motifs | Reck       | 313488 | 1,16 | up   |
| 6280205 | 7274585 | 1558793 | reversion-inducing-cysteine-rich protein with kazal motifs | Reck       | 313488 | 1,21 | up   |
| 6357452 | 7274585 | 1558768 | reversion-inducing-cysteine-rich protein with kazal motifs | Reck       | 313488 | 1,32 | up   |
| 6439590 | 7274585 | 1558785 | reversion-inducing-cysteine-rich protein with kazal motifs | Reck       | 313488 | 1,07 | up   |
| 6581468 | 7274585 | 1558796 | reversion-inducing-cysteine-rich protein with kazal motifs | Reck       | 313488 | 1,05 | up   |
| 6582768 | 7274585 | 1558772 | reversion-inducing-cysteine-rich protein with kazal motifs | Reck       | 313488 | 1,37 | down |
| 6592301 | 7274585 | 1558797 | reversion-inducing-cysteine-rich protein with kazal motifs | Reck       | 313488 | 1,32 | down |
| 6631399 | 7274585 | 1558784 | reversion-inducing-cysteine-rich protein with kazal motifs | Reck       | 313488 | 1,23 | down |
| 6665913 | 7274585 | 1558797 | reversion-inducing-cysteine-rich protein with kazal motifs | Reck       | 313488 | 2,34 | down |
| 6708113 | 7274585 | 1558791 | reversion-inducing-cysteine-rich protein with kazal motifs | Reck       | 313488 | 1,16 | up   |
| 6711928 | 7274585 | 1558776 | reversion-inducing-cysteine-rich protein with kazal motifs | Reck       | 313488 | 1,00 | down |
| 5886763 | 7290921 | 1599078 | RGD1559909                                                 | RGD1559909 | 362592 | 1,53 | up   |
| 5914670 | 7290921 | 1599077 | RGD1559909                                                 | RGD1559909 | 362592 | 2,12 | down |
| 6220501 | 7290921 | 1599077 | RGD1559909                                                 | RGD1559909 | 362592 | 1,28 | down |
| 6461655 | 7290921 | 1599077 | RGD1559909                                                 | RGD1559909 | 362592 | 1,36 | down |
| 5671926 | 7315571 | 1661006 | RGD1561648                                                 | RGD1561648 | 500841 | 1,75 | up   |
| 5738746 | 7315571 | 1660997 | RGD1561648                                                 | RGD1561648 | 500841 | 1,06 | down |
| 5744566 | 7315571 | 1660974 | RGD1561648                                                 | RGD1561648 | 500841 | 1,02 | down |
| 5822454 | 7315571 | 1661004 | RGD1561648                                                 | RGD1561648 | 500841 | 1,05 | down |
| 5957243 | 7315571 | 1661008 | RGD1561648                                                 | RGD1561648 | 500841 | 1,03 | up   |
| 6038454 | 7315571 | 1660969 | RGD1561648                                                 | RGD1561648 | 500841 | 1,93 | down |
| 6221077 | 7315571 | 1660974 | RGD1561648                                                 | RGD1561648 | 500841 | 1,67 | down |
| 6277016 | 7315571 | 1661002 | RGD1561648                                                 | RGD1561648 | 500841 | 1,55 | down |
| 6283641 | 7315571 | 1661007 | RGD1561648                                                 | RGD1561648 | 500841 | 1,07 | up   |
| 6318127 | 7315571 | 1660999 | RGD1561648                                                 | RGD1561648 | 500841 | 1,25 | down |
| 6519934 | 7315571 | 1660967 | RGD1561648                                                 | RGD1561648 | 500841 | 1,36 | up   |
| 6539160 | 7315571 | 1661009 | RGD1561648                                                 | RGD1561648 | 500841 | 2,23 | up   |
| 6550404 | 7315571 | 1661009 | RGD1561648                                                 | RGD1561648 | 500841 | 1,87 | up   |
| 6553350 | 7315571 | 1660973 | RGD1561648                                                 | RGD1561648 | 500841 | 1,09 | up   |
| 6583701 | 7315571 | 1661001 | RGD1561648                                                 | RGD1561648 | 500841 | 1,60 | down |
| 6628056 | 7315571 | 1660974 | RGD1561648                                                 | RGD1561648 | 500841 | 1,68 | down |
| 5620823 | 7156114 | 1266048 | RGD1562097                                                 | RGD1562097 | 498718 | 1,67 | up   |
| 5644349 | 7156114 | 1266045 | RGD1562097                                                 | RGD1562097 | 498718 | 2,23 | up   |
| 6058193 | 7156114 | 1266048 | RGD1562097                                                 | RGD1562097 | 498718 | 1,05 | up   |
| 6113176 | 7156114 | 1266049 | RGD1562097                                                 | RGD1562097 | 498718 | 1,65 | down |
| 5813090 | 7279073 | 1570686 | RGD1563049                                                 | RGD1563049 | 298493 | 1,05 | up   |
| 6026957 | 7279073 | 1570685 | RGD1563049                                                 | RGD1563049 | 298493 | 1,45 | up   |
| 6727401 | 7279073 | 1570687 | RGD1563049                                                 | RGD1563049 | 298493 | 1,19 | up   |
| 5662137 | 7341646 | 1724208 | RGD1563398                                                 | RGD1563398 | 301075 | 1,16 | down |
| 5672211 | 7341646 | 1724212 | RGD1563398                                                 | RGD1563398 | 301075 | 1,37 | up   |
| 5720223 | 7341646 | 1724196 | RGD1563398                                                 | RGD1563398 | 301075 | 1,47 | down |
| 5723037 | 7341646 | 1724195 | RGD1563398                                                 | RGD1563398 | 301075 | 1,54 | down |
| 5751319 | 7341646 | 1724199 | RGD1563398                                                 | RGD1563398 | 301075 | 1,21 | up   |

|         |         |         |                                  |            |        |      |      |
|---------|---------|---------|----------------------------------|------------|--------|------|------|
| 5755296 | 7341646 | 1724214 | RGD1563398                       | RGD1563398 | 301075 | 1,14 | up   |
| 5755547 | 7341646 | 1724209 | RGD1563398                       | RGD1563398 | 301075 | 1,10 | up   |
| 5770364 | 7341646 | 1724215 | RGD1563398                       | RGD1563398 | 301075 | 1,17 | up   |
| 5785689 | 7341646 | 1724213 | RGD1563398                       | RGD1563398 | 301075 | 1,27 | down |
| 5960648 | 7341646 | 1724205 | RGD1563398                       | RGD1563398 | 301075 | 1,12 | up   |
| 5962320 | 7341646 | 1724200 | RGD1563398                       | RGD1563398 | 301075 | 1,09 | up   |
| 5990661 | 7341646 | 1724194 | RGD1563398                       | RGD1563398 | 301075 | 1,33 | down |
| 6021198 | 7341646 | 1724204 | RGD1563398                       | RGD1563398 | 301075 | 1,03 | down |
| 6021436 | 7341646 | 1724192 | RGD1563398                       | RGD1563398 | 301075 | 1,39 | down |
| 6032766 | 7341646 | 1724194 | RGD1563398                       | RGD1563398 | 301075 | 1,06 | down |
| 6083013 | 7341646 | 1724215 | RGD1563398                       | RGD1563398 | 301075 | 1,01 | down |
| 6098312 | 7341646 | 1724193 | RGD1563398                       | RGD1563398 | 301075 | 1,08 | up   |
| 6127248 | 7341646 | 1724203 | RGD1563398                       | RGD1563398 | 301075 | 1,23 | down |
| 6171778 | 7341646 | 1724201 | RGD1563398                       | RGD1563398 | 301075 | 1,55 | down |
| 6345170 | 7341646 | 1724212 | RGD1563398                       | RGD1563398 | 301075 | 1,20 | up   |
| 6474954 | 7341646 | 1724215 | RGD1563398                       | RGD1563398 | 301075 | 1,05 | down |
| 6493215 | 7341646 | 1724207 | RGD1563398                       | RGD1563398 | 301075 | 1,01 | up   |
| 6617441 | 7341646 | 1724213 | RGD1563398                       | RGD1563398 | 301075 | 1,01 | up   |
| 6729631 | 7341646 | 1724214 | RGD1563398                       | RGD1563398 | 301075 | 1,40 | down |
| 6354081 | 7249737 | 1496748 | RGD1564792                       | RGD1564792 | 499976 | 1,32 | down |
| 5693629 | 7072329 | 1061634 | Rho family GTPase 2              | Rnd2       | 303553 | 2,42 | down |
| 5722334 | 7072329 | 1061635 | Rho family GTPase 2              | Rnd2       | 303553 | 1,02 | up   |
| 5881416 | 7072329 | 1061636 | Rho family GTPase 2              | Rnd2       | 303553 | 1,20 | up   |
| 6050590 | 7072329 | 1061637 | Rho family GTPase 2              | Rnd2       | 303553 | 1,44 | down |
| 6082009 | 7072329 | 1061632 | Rho family GTPase 2              | Rnd2       | 303553 | 1,16 | up   |
| 6334223 | 7072329 | 1061633 | Rho family GTPase 2              | Rnd2       | 303553 | 1,11 | down |
| 6643788 | 7072329 | 1061632 | Rho family GTPase 2              | Rnd2       | 303553 | 2,12 | down |
| 6256888 | 7238766 | 1470426 | Rho family GTPase 3              | Rnd3       | 295588 | 1,50 | down |
| 6508127 | 7238766 | 1470425 | Rho family GTPase 3              | Rnd3       | 295588 | 1,47 | down |
| 6528146 | 7238766 | 1470426 | Rho family GTPase 3              | Rnd3       | 295588 | 1,20 | up   |
| 6528655 | 7238766 | 1470428 | Rho family GTPase 3              | Rnd3       | 295588 | 1,08 | up   |
| 6544079 | 7238766 | 1470424 | Rho family GTPase 3              | Rnd3       | 295588 | 1,01 | up   |
| 6655189 | 7238766 | 1470428 | Rho family GTPase 3              | Rnd3       | 295588 | 2,12 | up   |
| 6663615 | 7238766 | 1470427 | Rho family GTPase 3              | Rnd3       | 295588 | 1,08 | up   |
| 6737924 | 7238766 | 1470428 | Rho family GTPase 3              | Rnd3       | 295588 | 1,22 | up   |
| 6110006 | 7167507 | 1293136 | Rho GTPase activating protein 21 | Arhgap21   | 307178 | 1,17 | down |
| 5620072 | 7169732 | 1298728 | Rho GTPase activating protein 26 | Arhgap26   | 307459 | 1,00 | down |
| 5648053 | 7169732 | 1298705 | Rho GTPase activating protein 26 | Arhgap26   | 307459 | 1,24 | down |
| 5677751 | 7169732 | 1298775 | Rho GTPase activating protein 26 | Arhgap26   | 307459 | 1,25 | down |
| 5752700 | 7169732 | 1298736 | Rho GTPase activating protein 26 | Arhgap26   | 307459 | 1,65 | up   |
| 5776927 | 7169732 | 1298710 | Rho GTPase activating protein 26 | Arhgap26   | 307459 | 1,04 | up   |
| 5781881 | 7169732 | 1298704 | Rho GTPase activating protein 26 | Arhgap26   | 307459 | 1,49 | up   |
| 5817587 | 7169732 | 1298698 | Rho GTPase activating protein 26 | Arhgap26   | 307459 | 1,33 | up   |
| 5820729 | 7169732 | 1298771 | Rho GTPase activating protein 26 | Arhgap26   | 307459 | 1,14 | up   |
| 5833344 | 7169732 | 1298703 | Rho GTPase activating protein 26 | Arhgap26   | 307459 | 1,07 | up   |
| 5864313 | 7169732 | 1298729 | Rho GTPase activating protein 26 | Arhgap26   | 307459 | 1,16 | down |
| 6118016 | 7169732 | 1298713 | Rho GTPase activating protein 26 | Arhgap26   | 307459 | 1,17 | up   |
| 6163632 | 7169732 | 1298771 | Rho GTPase activating protein 26 | Arhgap26   | 307459 | 1,02 | down |
| 6369871 | 7169732 | 1298779 | Rho GTPase activating protein 26 | Arhgap26   | 307459 | 1,14 | down |
| 6373406 | 7169732 | 1298700 | Rho GTPase activating protein 26 | Arhgap26   | 307459 | 1,00 | down |
| 6419885 | 7169732 | 1298733 | Rho GTPase activating protein 26 | Arhgap26   | 307459 | 1,24 | up   |
| 6469917 | 7169732 | 1298757 | Rho GTPase activating protein 26 | Arhgap26   | 307459 | 1,24 | up   |
| 6487099 | 7169732 | 1298686 | Rho GTPase activating protein 26 | Arhgap26   | 307459 | 1,03 | up   |
| 6502727 | 7169732 | 1298708 | Rho GTPase activating protein 26 | Arhgap26   | 307459 | 1,08 | down |
| 6508783 | 7169732 | 1298750 | Rho GTPase activating protein 26 | Arhgap26   | 307459 | 1,16 | up   |
| 6565593 | 7169732 | 1298707 | Rho GTPase activating protein 26 | Arhgap26   | 307459 | 1,25 | down |

|         |         |         |                                                    |          |        |      |      |
|---------|---------|---------|----------------------------------------------------|----------|--------|------|------|
| 6573293 | 7169732 | 1298722 | Rho GTPase activating protein 26                   | Arhgap26 | 307459 | 1,10 | up   |
| 6590088 | 7169732 | 1298734 | Rho GTPase activating protein 26                   | Arhgap26 | 307459 | 1,29 | down |
| 6673381 | 7169732 | 1298757 | Rho GTPase activating protein 26                   | Arhgap26 | 307459 | 1,19 | up   |
| 6683270 | 7169732 | 1298706 | Rho GTPase activating protein 26                   | Arhgap26 | 307459 | 1,20 | down |
| 6689568 | 7169732 | 1298748 | Rho GTPase activating protein 26                   | Arhgap26 | 307459 | 1,09 | up   |
| 5618069 | 7384959 | 1831766 | Rho GTPase activating protein 4                    | Arhgap4  | 246249 | 1,08 | up   |
| 5629364 | 7384959 | 1831766 | Rho GTPase activating protein 4                    | Arhgap4  | 246249 | 1,00 | up   |
| 5645753 | 7384959 | 1831750 | Rho GTPase activating protein 4                    | Arhgap4  | 246249 | 1,83 | down |
| 5713988 | 7384959 | 1831750 | Rho GTPase activating protein 4                    | Arhgap4  | 246249 | 1,75 | up   |
| 5735790 | 7384959 | 1831763 | Rho GTPase activating protein 4                    | Arhgap4  | 246249 | 1,01 | down |
| 5894731 | 7384959 | 1831757 | Rho GTPase activating protein 4                    | Arhgap4  | 246249 | 1,21 | up   |
| 5908992 | 7384959 | 1831770 | Rho GTPase activating protein 4                    | Arhgap4  | 246249 | 1,43 | up   |
| 6036983 | 7384959 | 1831754 | Rho GTPase activating protein 4                    | Arhgap4  | 246249 | 1,01 | up   |
| 6116751 | 7384959 | 1831768 | Rho GTPase activating protein 4                    | Arhgap4  | 246249 | 1,28 | down |
| 6228152 | 7384959 | 1831761 | Rho GTPase activating protein 4                    | Arhgap4  | 246249 | 1,13 | down |
| 6238219 | 7384959 | 1831754 | Rho GTPase activating protein 4                    | Arhgap4  | 246249 | 1,30 | up   |
| 6253829 | 7384959 | 1831764 | Rho GTPase activating protein 4                    | Arhgap4  | 246249 | 1,03 | down |
| 6270477 | 7384959 | 1831758 | Rho GTPase activating protein 4                    | Arhgap4  | 246249 | 2,16 | down |
| 6277175 | 7384959 | 1831762 | Rho GTPase activating protein 4                    | Arhgap4  | 246249 | 1,14 | up   |
| 6281503 | 7384959 | 1831767 | Rho GTPase activating protein 4                    | Arhgap4  | 246249 | 1,24 | down |
| 6313415 | 7384959 | 1831759 | Rho GTPase activating protein 4                    | Arhgap4  | 246249 | 1,26 | up   |
| 6324042 | 7384959 | 1831760 | Rho GTPase activating protein 4                    | Arhgap4  | 246249 | 1,02 | up   |
| 6360142 | 7384959 | 1831753 | Rho GTPase activating protein 4                    | Arhgap4  | 246249 | 1,02 | down |
| 6413685 | 7384959 | 1831752 | Rho GTPase activating protein 4                    | Arhgap4  | 246249 | 1,36 | up   |
| 6478833 | 7384959 | 1831751 | Rho GTPase activating protein 4                    | Arhgap4  | 246249 | 1,12 | down |
| 6498461 | 7384959 | 1831749 | Rho GTPase activating protein 4                    | Arhgap4  | 246249 | 1,15 | down |
| 6521807 | 7384959 | 1831755 | Rho GTPase activating protein 4                    | Arhgap4  | 246249 | 1,11 | up   |
| 6646724 | 7384959 | 1831765 | Rho GTPase activating protein 4                    | Arhgap4  | 246249 | 1,45 | up   |
| 6698072 | 7384959 | 1831748 | Rho GTPase activating protein 4                    | Arhgap4  | 246249 | 1,15 | up   |
| 6699847 | 7384959 | 1831756 | Rho GTPase activating protein 4                    | Arhgap4  | 246249 | 1,62 | down |
| 6739082 | 7384959 | 1831770 | Rho GTPase activating protein 4                    | Arhgap4  | 246249 | 1,52 | up   |
| 6743530 | 7384959 | 1831769 | Rho GTPase activating protein 4                    | Arhgap4  | 246249 | 1,13 | up   |
| 5644498 | 7319458 | 1670863 | Rho GTPase activating protein 8                    | Arhgap8  | 300115 | 1,15 | down |
| 5702822 | 7319458 | 1670866 | Rho GTPase activating protein 8                    | Arhgap8  | 300115 | 1,08 | up   |
| 5714608 | 7319458 | 1670856 | Rho GTPase activating protein 8                    | Arhgap8  | 300115 | 2,97 | down |
| 5831366 | 7319458 | 1670864 | Rho GTPase activating protein 8                    | Arhgap8  | 300115 | 1,01 | down |
| 6001492 | 7319458 | 1670855 | Rho GTPase activating protein 8                    | Arhgap8  | 300115 | 1,34 | down |
| 6017195 | 7319458 | 1670861 | Rho GTPase activating protein 8                    | Arhgap8  | 300115 | 1,20 | up   |
| 6133870 | 7319458 | 1670856 | Rho GTPase activating protein 8                    | Arhgap8  | 300115 | 1,00 | down |
| 6267383 | 7319458 | 1670866 | Rho GTPase activating protein 8                    | Arhgap8  | 300115 | 1,01 | down |
| 6327508 | 7319458 | 1670857 | Rho GTPase activating protein 8                    | Arhgap8  | 300115 | 1,14 | up   |
| 6366290 | 7319458 | 1670860 | Rho GTPase activating protein 8                    | Arhgap8  | 300115 | 1,26 | up   |
| 6470528 | 7319458 | 1670859 | Rho GTPase activating protein 8                    | Arhgap8  | 300115 | 1,10 | up   |
| 6585717 | 7319458 | 1670865 | Rho GTPase activating protein 8                    | Arhgap8  | 300115 | 1,13 | down |
| 6618244 | 7319458 | 1670862 | Rho GTPase activating protein 8                    | Arhgap8  | 300115 | 1,13 | up   |
| 6652056 | 7319458 | 1670858 | Rho GTPase activating protein 8                    | Arhgap8  | 300115 | 1,23 | up   |
| 5671444 | 7196120 | 1365859 | rho/rac guanine nucleotide exchange factor (GEF) 2 | Arhgef2  | 310635 | 1,26 | down |
| 5684989 | 7196120 | 1365870 | rho/rac guanine nucleotide exchange factor (GEF) 2 | Arhgef2  | 310635 | 1,96 | up   |
| 5731254 | 7196120 | 1365867 | rho/rac guanine nucleotide exchange factor (GEF) 2 | Arhgef2  | 310635 | 1,16 | down |
| 5748307 | 7196120 | 1365878 | rho/rac guanine nucleotide exchange factor (GEF) 2 | Arhgef2  | 310635 | 1,40 | up   |
| 5825629 | 7196120 | 1365877 | rho/rac guanine nucleotide exchange factor (GEF) 2 | Arhgef2  | 310635 | 1,08 | up   |
| 6006141 | 7196120 | 1365857 | rho/rac guanine nucleotide exchange factor (GEF) 2 | Arhgef2  | 310635 | 2,35 | down |
| 6006614 | 7196120 | 1365869 | rho/rac guanine nucleotide exchange factor (GEF) 2 | Arhgef2  | 310635 | 1,05 | down |
| 6019969 | 7196120 | 1365879 | rho/rac guanine nucleotide exchange factor (GEF) 2 | Arhgef2  | 310635 | 1,34 | down |
| 6098851 | 7196120 | 1365861 | rho/rac guanine nucleotide exchange factor (GEF) 2 | Arhgef2  | 310635 | 1,16 | down |
| 6107045 | 7196120 | 1365873 | rho/rac guanine nucleotide exchange factor (GEF) 2 | Arhgef2  | 310635 | 2,57 | down |

|         |         |         |                                                    |         |        |      |      |
|---------|---------|---------|----------------------------------------------------|---------|--------|------|------|
| 6108047 | 7196120 | 1365872 | rho/rac guanine nucleotide exchange factor (GEF) 2 | Arhgef2 | 310635 | 1,05 | down |
| 6131755 | 7196120 | 1365875 | rho/rac guanine nucleotide exchange factor (GEF) 2 | Arhgef2 | 310635 | 1,08 | down |
| 6136220 | 7196120 | 1365874 | rho/rac guanine nucleotide exchange factor (GEF) 2 | Arhgef2 | 310635 | 1,17 | up   |
| 6139761 | 7196120 | 1365865 | rho/rac guanine nucleotide exchange factor (GEF) 2 | Arhgef2 | 310635 | 1,01 | down |
| 6180796 | 7196120 | 1365862 | rho/rac guanine nucleotide exchange factor (GEF) 2 | Arhgef2 | 310635 | 1,05 | down |
| 6238998 | 7196120 | 1365876 | rho/rac guanine nucleotide exchange factor (GEF) 2 | Arhgef2 | 310635 | 1,10 | up   |
| 6278858 | 7196120 | 1365871 | rho/rac guanine nucleotide exchange factor (GEF) 2 | Arhgef2 | 310635 | 1,10 | up   |
| 6351247 | 7196120 | 1365866 | rho/rac guanine nucleotide exchange factor (GEF) 2 | Arhgef2 | 310635 | 1,16 | down |
| 6374787 | 7196120 | 1365860 | rho/rac guanine nucleotide exchange factor (GEF) 2 | Arhgef2 | 310635 | 1,05 | up   |
| 6497439 | 7196120 | 1365864 | rho/rac guanine nucleotide exchange factor (GEF) 2 | Arhgef2 | 310635 | 1,07 | up   |
| 6564754 | 7196120 | 1365858 | rho/rac guanine nucleotide exchange factor (GEF) 2 | Arhgef2 | 310635 | 1,30 | up   |
| 6596514 | 7196120 | 1365868 | rho/rac guanine nucleotide exchange factor (GEF) 2 | Arhgef2 | 310635 | 1,41 | up   |
| 6597098 | 7196120 | 1365863 | rho/rac guanine nucleotide exchange factor (GEF) 2 | Arhgef2 | 310635 | 1,41 | up   |
| 6613583 | 7196120 | 1365857 | rho/rac guanine nucleotide exchange factor (GEF) 2 | Arhgef2 | 310635 | 1,41 | down |
| 5628420 | 7326203 | 1686261 | RhoA/RAC/CDC42 exchange factor                     | Gef2    | 314904 | 2,14 | up   |
| 5637784 | 7326203 | 1686259 | RhoA/RAC/CDC42 exchange factor                     | Gef2    | 314904 | 1,29 | down |
| 5769560 | 7326203 | 1686262 | RhoA/RAC/CDC42 exchange factor                     | Gef2    | 314904 | 1,08 | down |
| 5910865 | 7326203 | 1686265 | RhoA/RAC/CDC42 exchange factor                     | Gef2    | 314904 | 1,16 | up   |
| 5923611 | 7326203 | 1686271 | RhoA/RAC/CDC42 exchange factor                     | Gef2    | 314904 | 1,01 | down |
| 5979167 | 7326203 | 1686272 | RhoA/RAC/CDC42 exchange factor                     | Gef2    | 314904 | 1,01 | down |
| 5994429 | 7326203 | 1686268 | RhoA/RAC/CDC42 exchange factor                     | Gef2    | 314904 | 1,04 | up   |
| 6028645 | 7326203 | 1686263 | RhoA/RAC/CDC42 exchange factor                     | Gef2    | 314904 | 1,25 | down |
| 6101297 | 7326203 | 1686271 | RhoA/RAC/CDC42 exchange factor                     | Gef2    | 314904 | 1,17 | up   |
| 6156586 | 7326203 | 1686271 | RhoA/RAC/CDC42 exchange factor                     | Gef2    | 314904 | 1,48 | down |
| 6190224 | 7326203 | 1686269 | RhoA/RAC/CDC42 exchange factor                     | Gef2    | 314904 | 1,40 | down |
| 6238830 | 7326203 | 1686264 | RhoA/RAC/CDC42 exchange factor                     | Gef2    | 314904 | 1,30 | down |
| 6288300 | 7326203 | 1686273 | RhoA/RAC/CDC42 exchange factor                     | Gef2    | 314904 | 1,18 | up   |
| 6336160 | 7326203 | 1686258 | RhoA/RAC/CDC42 exchange factor                     | Gef2    | 314904 | 1,03 | down |
| 6432083 | 7326203 | 1686270 | RhoA/RAC/CDC42 exchange factor                     | Gef2    | 314904 | 1,11 | up   |
| 6509120 | 7326203 | 1686266 | RhoA/RAC/CDC42 exchange factor                     | Gef2    | 314904 | 1,52 | up   |
| 6574797 | 7326203 | 1686258 | RhoA/RAC/CDC42 exchange factor                     | Gef2    | 314904 | 1,05 | up   |
| 6620653 | 7326203 | 1686260 | RhoA/RAC/CDC42 exchange factor                     | Gef2    | 314904 | 1,17 | up   |
| 6634549 | 7326203 | 1686267 | RhoA/RAC/CDC42 exchange factor                     | Gef2    | 314904 | 1,47 | down |
| 6645831 | 7326203 | 1686259 | RhoA/RAC/CDC42 exchange factor                     | Gef2    | 314904 | 1,34 | down |
| 6665897 | 7326203 | 1686273 | RhoA/RAC/CDC42 exchange factor                     | Gef2    | 314904 | 1,05 | up   |
| 5712293 | 7084716 | 1090116 | rhomboid 5 homolog 2 (Drosophila)                  | Rhbdf2  | 303690 | 2,11 | up   |
| 5715478 | 7084716 | 1090114 | rhomboid 5 homolog 2 (Drosophila)                  | Rhbdf2  | 303690 | 1,51 | down |
| 5738828 | 7084716 | 1090111 | rhomboid 5 homolog 2 (Drosophila)                  | Rhbdf2  | 303690 | 1,73 | up   |
| 5748928 | 7084716 | 1090122 | rhomboid 5 homolog 2 (Drosophila)                  | Rhbdf2  | 303690 | 2,04 | down |
| 5879515 | 7084716 | 1090109 | rhomboid 5 homolog 2 (Drosophila)                  | Rhbdf2  | 303690 | 1,58 | up   |
| 6019655 | 7084716 | 1090112 | rhomboid 5 homolog 2 (Drosophila)                  | Rhbdf2  | 303690 | 1,27 | down |
| 6108174 | 7084716 | 1090121 | rhomboid 5 homolog 2 (Drosophila)                  | Rhbdf2  | 303690 | 2,15 | down |
| 6128106 | 7084716 | 1090113 | rhomboid 5 homolog 2 (Drosophila)                  | Rhbdf2  | 303690 | 1,08 | down |
| 6157786 | 7084716 | 1090110 | rhomboid 5 homolog 2 (Drosophila)                  | Rhbdf2  | 303690 | 1,51 | up   |
| 6189134 | 7084716 | 1090120 | rhomboid 5 homolog 2 (Drosophila)                  | Rhbdf2  | 303690 | 1,25 | up   |
| 6204291 | 7084716 | 1090122 | rhomboid 5 homolog 2 (Drosophila)                  | Rhbdf2  | 303690 | 1,47 | down |
| 6302844 | 7084716 | 1090118 | rhomboid 5 homolog 2 (Drosophila)                  | Rhbdf2  | 303690 | 1,22 | up   |
| 6308851 | 7084716 | 1090115 | rhomboid 5 homolog 2 (Drosophila)                  | Rhbdf2  | 303690 | 1,65 | up   |
| 6321842 | 7084716 | 1090118 | rhomboid 5 homolog 2 (Drosophila)                  | Rhbdf2  | 303690 | 1,57 | down |
| 6374276 | 7084716 | 1090123 | rhomboid 5 homolog 2 (Drosophila)                  | Rhbdf2  | 303690 | 1,06 | down |
| 6411770 | 7084716 | 1090123 | rhomboid 5 homolog 2 (Drosophila)                  | Rhbdf2  | 303690 | 1,64 | down |
| 6424020 | 7084716 | 1090108 | rhomboid 5 homolog 2 (Drosophila)                  | Rhbdf2  | 303690 | 1,09 | up   |
| 6428853 | 7084716 | 1090108 | rhomboid 5 homolog 2 (Drosophila)                  | Rhbdf2  | 303690 | 1,24 | up   |
| 6470896 | 7084716 | 1090118 | rhomboid 5 homolog 2 (Drosophila)                  | Rhbdf2  | 303690 | 1,64 | up   |
| 6483405 | 7084716 | 1090110 | rhomboid 5 homolog 2 (Drosophila)                  | Rhbdf2  | 303690 | 1,55 | up   |
| 6498656 | 7084716 | 1090117 | rhomboid 5 homolog 2 (Drosophila)                  | Rhbdf2  | 303690 | 1,49 | up   |

|         |         |         |                                   |        |        |      |      |
|---------|---------|---------|-----------------------------------|--------|--------|------|------|
| 6499766 | 7084716 | 1090121 | rhomboid 5 homolog 2 (Drosophila) | Rhbdf2 | 303690 | 2,93 | down |
| 6531959 | 7084716 | 1090128 | rhomboid 5 homolog 2 (Drosophila) | Rhbdf2 | 303690 | 2,75 | down |
| 6596483 | 7084716 | 1090119 | rhomboid 5 homolog 2 (Drosophila) | Rhbdf2 | 303690 | 1,21 | up   |
| 5649857 | 7380689 | 1822219 | RIB43A domain with coiled-coils 1 | Ribc1  | 317431 | 1,39 | down |
| 5782378 | 7380689 | 1822218 | RIB43A domain with coiled-coils 1 | Ribc1  | 317431 | 1,07 | down |
| 5885095 | 7380689 | 1822214 | RIB43A domain with coiled-coils 1 | Ribc1  | 317431 | 1,07 | up   |
| 5915980 | 7380689 | 1822214 | RIB43A domain with coiled-coils 1 | Ribc1  | 317431 | 1,56 | up   |
| 5935391 | 7380689 | 1822220 | RIB43A domain with coiled-coils 1 | Ribc1  | 317431 | 1,30 | down |
| 6340335 | 7380689 | 1822216 | RIB43A domain with coiled-coils 1 | Ribc1  | 317431 | 1,23 | down |
| 6541308 | 7380689 | 1822221 | RIB43A domain with coiled-coils 1 | Ribc1  | 317431 | 1,35 | down |
| 6661893 | 7380689 | 1822215 | RIB43A domain with coiled-coils 1 | Ribc1  | 317431 | 2,53 | down |
| 6727951 | 7380689 | 1822217 | RIB43A domain with coiled-coils 1 | Ribc1  | 317431 | 1,20 | down |
| 5717538 | 7136963 | 1218761 | ribonuclease P 14 subunit (human) | Rpp14  | 361020 | 1,06 | up   |
| 5788554 | 7136963 | 1218761 | ribonuclease P 14 subunit (human) | Rpp14  | 361020 | 1,31 | up   |
| 5840644 | 7136963 | 1218761 | ribonuclease P 14 subunit (human) | Rpp14  | 361020 | 1,04 | up   |
| 5909217 | 7136963 | 1218762 | ribonuclease P 14 subunit (human) | Rpp14  | 361020 | 1,03 | down |
| 5916719 | 7136963 | 1218761 | ribonuclease P 14 subunit (human) | Rpp14  | 361020 | 1,02 | down |
| 5999964 | 7136963 | 1218765 | ribonuclease P 14 subunit (human) | Rpp14  | 361020 | 1,08 | up   |
| 6008577 | 7136963 | 1218763 | ribonuclease P 14 subunit (human) | Rpp14  | 361020 | 1,19 | down |
| 6279189 | 7136963 | 1218761 | ribonuclease P 14 subunit (human) | Rpp14  | 361020 | 1,18 | up   |
| 6363626 | 7136963 | 1218768 | ribonuclease P 14 subunit (human) | Rpp14  | 361020 | 1,14 | down |
| 6371693 | 7136963 | 1218766 | ribonuclease P 14 subunit (human) | Rpp14  | 361020 | 1,13 | up   |
| 6410502 | 7136963 | 1218761 | ribonuclease P 14 subunit (human) | Rpp14  | 361020 | 1,65 | up   |
| 6651284 | 7136963 | 1218764 | ribonuclease P 14 subunit (human) | Rpp14  | 361020 | 1,21 | down |
| 6726577 | 7136963 | 1218760 | ribonuclease P 14 subunit (human) | Rpp14  | 361020 | 1,15 | down |
| 5663807 | 7190844 | 1352150 | ribonuclease type III, nuclear    | Rnasen | 310159 | 1,24 | down |
| 5664593 | 7190844 | 1352151 | ribonuclease type III, nuclear    | Rnasen | 310159 | 1,52 | down |
| 5721139 | 7190844 | 1352132 | ribonuclease type III, nuclear    | Rnasen | 310159 | 1,10 | down |
| 5731407 | 7190844 | 1352110 | ribonuclease type III, nuclear    | Rnasen | 310159 | 1,34 | up   |
| 5770790 | 7190844 | 1352160 | ribonuclease type III, nuclear    | Rnasen | 310159 | 1,02 | down |
| 5780870 | 7190844 | 1352116 | ribonuclease type III, nuclear    | Rnasen | 310159 | 1,02 | up   |
| 5785932 | 7190844 | 1352170 | ribonuclease type III, nuclear    | Rnasen | 310159 | 1,01 | up   |
| 5799227 | 7190844 | 1352115 | ribonuclease type III, nuclear    | Rnasen | 310159 | 1,11 | up   |
| 5839283 | 7190844 | 1352111 | ribonuclease type III, nuclear    | Rnasen | 310159 | 1,17 | up   |
| 5918745 | 7190844 | 1352114 | ribonuclease type III, nuclear    | Rnasen | 310159 | 1,19 | down |
| 5992237 | 7190844 | 1352158 | ribonuclease type III, nuclear    | Rnasen | 310159 | 1,07 | up   |
| 5999055 | 7190844 | 1352111 | ribonuclease type III, nuclear    | Rnasen | 310159 | 1,03 | down |
| 6028727 | 7190844 | 1352111 | ribonuclease type III, nuclear    | Rnasen | 310159 | 1,14 | up   |
| 6154389 | 7190844 | 1352155 | ribonuclease type III, nuclear    | Rnasen | 310159 | 1,03 | down |
| 6168686 | 7190844 | 1352111 | ribonuclease type III, nuclear    | Rnasen | 310159 | 1,30 | up   |
| 6183721 | 7190844 | 1352151 | ribonuclease type III, nuclear    | Rnasen | 310159 | 1,74 | down |
| 6188079 | 7190844 | 1352166 | ribonuclease type III, nuclear    | Rnasen | 310159 | 1,47 | down |
| 6191468 | 7190844 | 1352166 | ribonuclease type III, nuclear    | Rnasen | 310159 | 1,24 | down |
| 6192315 | 7190844 | 1352113 | ribonuclease type III, nuclear    | Rnasen | 310159 | 1,02 | up   |
| 6194586 | 7190844 | 1352128 | ribonuclease type III, nuclear    | Rnasen | 310159 | 1,04 | down |
| 6211077 | 7190844 | 1352162 | ribonuclease type III, nuclear    | Rnasen | 310159 | 1,02 | down |
| 6245135 | 7190844 | 1352168 | ribonuclease type III, nuclear    | Rnasen | 310159 | 2,02 | down |
| 6256271 | 7190844 | 1352131 | ribonuclease type III, nuclear    | Rnasen | 310159 | 1,31 | up   |
| 6353348 | 7190844 | 1352167 | ribonuclease type III, nuclear    | Rnasen | 310159 | 1,18 | down |
| 6381948 | 7190844 | 1352108 | ribonuclease type III, nuclear    | Rnasen | 310159 | 1,40 | up   |
| 6384581 | 7190844 | 1352165 | ribonuclease type III, nuclear    | Rnasen | 310159 | 1,03 | down |
| 6417948 | 7190844 | 1352121 | ribonuclease type III, nuclear    | Rnasen | 310159 | 1,16 | down |
| 6478543 | 7190844 | 1352129 | ribonuclease type III, nuclear    | Rnasen | 310159 | 1,70 | up   |
| 6518309 | 7190844 | 1352169 | ribonuclease type III, nuclear    | Rnasen | 310159 | 1,41 | down |
| 6648360 | 7190844 | 1352115 | ribonuclease type III, nuclear    | Rnasen | 310159 | 1,62 | up   |
| 6671167 | 7190844 | 1352106 | ribonuclease type III, nuclear    | Rnasen | 310159 | 1,05 | down |



|         |         |         |                                                    |         |        |      |      |
|---------|---------|---------|----------------------------------------------------|---------|--------|------|------|
| 6672182 | 7190844 | 1352117 | ribonuclease type III, nuclear                     | Rnasen  | 310159 | 1,02 | up   |
| 6686746 | 7190844 | 1352170 | ribonuclease type III, nuclear                     | Rnasen  | 310159 | 1,09 | up   |
| 6729936 | 7190844 | 1352127 | ribonuclease type III, nuclear                     | Rnasen  | 310159 | 1,24 | up   |
| 5624137 | 7058717 | 1028690 | ribonuclease/angiogenin inhibitor 1                | Rnh1    | 245964 | 1,72 | up   |
| 5699497 | 7058717 | 1028685 | ribonuclease/angiogenin inhibitor 1                | Rnh1    | 245964 | 1,11 | up   |
| 5700694 | 7058717 | 1028682 | ribonuclease/angiogenin inhibitor 1                | Rnh1    | 245964 | 2,02 | down |
| 5885226 | 7058717 | 1028692 | ribonuclease/angiogenin inhibitor 1                | Rnh1    | 245964 | 1,85 | down |
| 6051254 | 7058717 | 1028689 | ribonuclease/angiogenin inhibitor 1                | Rnh1    | 245964 | 1,18 | up   |
| 6240615 | 7058717 | 1028684 | ribonuclease/angiogenin inhibitor 1                | Rnh1    | 245964 | 1,03 | up   |
| 6341062 | 7058717 | 1028688 | ribonuclease/angiogenin inhibitor 1                | Rnh1    | 245964 | 1,42 | up   |
| 6412207 | 7058717 | 1028683 | ribonuclease/angiogenin inhibitor 1                | Rnh1    | 245964 | 1,37 | down |
| 6489410 | 7058717 | 1028686 | ribonuclease/angiogenin inhibitor 1                | Rnh1    | 245964 | 1,07 | down |
| 6717981 | 7058717 | 1028687 | ribonuclease/angiogenin inhibitor 1                | Rnh1    | 245964 | 1,02 | up   |
| 6737454 | 7058717 | 1028691 | ribonuclease/angiogenin inhibitor 1                | Rnh1    | 245964 | 1,04 | up   |
| 5726932 | 7277719 | 1567095 | ribonucleoprotein, PTB-binding 2                   | Raver2  | 362551 | 1,14 | down |
| 5861493 | 7277719 | 1567095 | ribonucleoprotein, PTB-binding 2                   | Raver2  | 362551 | 1,05 | up   |
| 6552869 | 7277719 | 1567095 | ribonucleoprotein, PTB-binding 2                   | Raver2  | 362551 | 1,07 | down |
| 5807990 | 7292100 | 1601542 | ribosomal protein L11                              | Rpl11   | 362631 | 1,41 | down |
| 5820818 | 7292100 | 1601540 | ribosomal protein L11                              | Rpl11   | 362631 | 1,13 | down |
| 6171670 | 7292100 | 1601542 | ribosomal protein L11                              | Rpl11   | 362631 | 1,07 | down |
| 6209771 | 7292100 | 1601539 | ribosomal protein L11                              | Rpl11   | 362631 | 1,11 | down |
| 6482992 | 7292100 | 1601541 | ribosomal protein L11                              | Rpl11   | 362631 | 1,11 | down |
| 6506562 | 7292100 | 1601538 | ribosomal protein L11                              | Rpl11   | 362631 | 1,46 | down |
| 5649726 | 7281923 | 1577694 | ribosomal protein L22                              | Rpl22   | 81768  | 1,01 | down |
| 5963383 | 7281923 | 1577699 | ribosomal protein L22                              | Rpl22   | 81768  | 1,26 | up   |
| 6354175 | 7281923 | 1577691 | ribosomal protein L22                              | Rpl22   | 81768  | 1,01 | up   |
| 6470315 | 7281923 | 1577696 | ribosomal protein L22                              | Rpl22   | 81768  | 1,03 | down |
| 5682581 | 7309703 | 1646839 | ribosomal protein S6 kinase, polypeptide 5         | Rps6ka5 | 314384 | 1,25 | up   |
| 5689605 | 7309703 | 1646834 | ribosomal protein S6 kinase, polypeptide 5         | Rps6ka5 | 314384 | 1,08 | up   |
| 5759276 | 7309703 | 1646832 | ribosomal protein S6 kinase, polypeptide 5         | Rps6ka5 | 314384 | 1,12 | down |
| 5839944 | 7309703 | 1646829 | ribosomal protein S6 kinase, polypeptide 5         | Rps6ka5 | 314384 | 1,11 | down |
| 5890667 | 7309703 | 1646818 | ribosomal protein S6 kinase, polypeptide 5         | Rps6ka5 | 314384 | 1,20 | down |
| 5994433 | 7309703 | 1646823 | ribosomal protein S6 kinase, polypeptide 5         | Rps6ka5 | 314384 | 1,10 | up   |
| 6009510 | 7309703 | 1646824 | ribosomal protein S6 kinase, polypeptide 5         | Rps6ka5 | 314384 | 1,16 | down |
| 6147801 | 7309703 | 1646822 | ribosomal protein S6 kinase, polypeptide 5         | Rps6ka5 | 314384 | 1,04 | up   |
| 6269155 | 7309703 | 1646829 | ribosomal protein S6 kinase, polypeptide 5         | Rps6ka5 | 314384 | 1,01 | down |
| 6350950 | 7309703 | 1646837 | ribosomal protein S6 kinase, polypeptide 5         | Rps6ka5 | 314384 | 1,51 | down |
| 6389919 | 7309703 | 1646825 | ribosomal protein S6 kinase, polypeptide 5         | Rps6ka5 | 314384 | 1,03 | down |
| 6399905 | 7309703 | 1646813 | ribosomal protein S6 kinase, polypeptide 5         | Rps6ka5 | 314384 | 1,32 | down |
| 6457682 | 7309703 | 1646819 | ribosomal protein S6 kinase, polypeptide 5         | Rps6ka5 | 314384 | 1,01 | up   |
| 6459541 | 7309703 | 1646814 | ribosomal protein S6 kinase, polypeptide 5         | Rps6ka5 | 314384 | 1,10 | up   |
| 6466771 | 7309703 | 1646821 | ribosomal protein S6 kinase, polypeptide 5         | Rps6ka5 | 314384 | 2,10 | down |
| 6517276 | 7309703 | 1646813 | ribosomal protein S6 kinase, polypeptide 5         | Rps6ka5 | 314384 | 1,02 | up   |
| 6567453 | 7309703 | 1646815 | ribosomal protein S6 kinase, polypeptide 5         | Rps6ka5 | 314384 | 1,74 | down |
| 6744338 | 7309703 | 1646831 | ribosomal protein S6 kinase, polypeptide 5         | Rps6ka5 | 314384 | 1,08 | down |
| 5630982 | 7217555 | 1416848 | ribosomal RNA processing 1 homolog (S. cerevisiae) | Rrp1    | 309674 | 1,06 | down |
| 5736318 | 7217555 | 1416847 | ribosomal RNA processing 1 homolog (S. cerevisiae) | Rrp1    | 309674 | 1,02 | down |
| 5741540 | 7217555 | 1416848 | ribosomal RNA processing 1 homolog (S. cerevisiae) | Rrp1    | 309674 | 1,05 | down |
| 5769310 | 7217555 | 1416848 | ribosomal RNA processing 1 homolog (S. cerevisiae) | Rrp1    | 309674 | 1,65 | down |
| 5826093 | 7217555 | 1416839 | ribosomal RNA processing 1 homolog (S. cerevisiae) | Rrp1    | 309674 | 1,04 | up   |
| 5831131 | 7217555 | 1416837 | ribosomal RNA processing 1 homolog (S. cerevisiae) | Rrp1    | 309674 | 1,06 | up   |
| 5894525 | 7217555 | 1416844 | ribosomal RNA processing 1 homolog (S. cerevisiae) | Rrp1    | 309674 | 1,03 | up   |
| 5946192 | 7217555 | 1416837 | ribosomal RNA processing 1 homolog (S. cerevisiae) | Rrp1    | 309674 | 1,18 | down |
| 5950433 | 7217555 | 1416845 | ribosomal RNA processing 1 homolog (S. cerevisiae) | Rrp1    | 309674 | 1,07 | down |
| 5960350 | 7217555 | 1416843 | ribosomal RNA processing 1 homolog (S. cerevisiae) | Rrp1    | 309674 | 1,02 | up   |
| 6102594 | 7217555 | 1416842 | ribosomal RNA processing 1 homolog (S. cerevisiae) | Rrp1    | 309674 | 1,04 | up   |

|         |         |         |                                                                             |        |        |      |      |
|---------|---------|---------|-----------------------------------------------------------------------------|--------|--------|------|------|
| 6136581 | 7217555 | 1416838 | ribosomal RNA processing 1 homolog ( <i>S. cerevisiae</i> )                 | Rrp1   | 309674 | 1,31 | down |
| 6291643 | 7217555 | 1416841 | ribosomal RNA processing 1 homolog ( <i>S. cerevisiae</i> )                 | Rrp1   | 309674 | 1,06 | up   |
| 6363574 | 7217555 | 1416840 | ribosomal RNA processing 1 homolog ( <i>S. cerevisiae</i> )                 | Rrp1   | 309674 | 1,15 | up   |
| 6561739 | 7217555 | 1416846 | ribosomal RNA processing 1 homolog ( <i>S. cerevisiae</i> )                 | Rrp1   | 309674 | 2,82 | down |
| 5637757 | 7340060 | 1720343 | ribosomal RNA processing 9, small subunit (SSU) processome component, homol | Rrp9   | 363134 | 1,36 | up   |
| 5682627 | 7340060 | 1720348 | ribosomal RNA processing 9, small subunit (SSU) processome component, homol | Rrp9   | 363134 | 1,62 | up   |
| 5737534 | 7340060 | 1720346 | ribosomal RNA processing 9, small subunit (SSU) processome component, homol | Rrp9   | 363134 | 1,32 | down |
| 5842544 | 7340060 | 1720350 | ribosomal RNA processing 9, small subunit (SSU) processome component, homol | Rrp9   | 363134 | 1,10 | down |
| 5967609 | 7340060 | 1720347 | ribosomal RNA processing 9, small subunit (SSU) processome component, homol | Rrp9   | 363134 | 1,23 | up   |
| 6016335 | 7340060 | 1720353 | ribosomal RNA processing 9, small subunit (SSU) processome component, homol | Rrp9   | 363134 | 1,13 | down |
| 6123665 | 7340060 | 1720339 | ribosomal RNA processing 9, small subunit (SSU) processome component, homol | Rrp9   | 363134 | 1,04 | up   |
| 6153845 | 7340060 | 1720338 | ribosomal RNA processing 9, small subunit (SSU) processome component, homol | Rrp9   | 363134 | 1,53 | down |
| 6245129 | 7340060 | 1720344 | ribosomal RNA processing 9, small subunit (SSU) processome component, homol | Rrp9   | 363134 | 1,18 | up   |
| 6329792 | 7340060 | 1720342 | ribosomal RNA processing 9, small subunit (SSU) processome component, homol | Rrp9   | 363134 | 1,84 | up   |
| 6334565 | 7340060 | 1720352 | ribosomal RNA processing 9, small subunit (SSU) processome component, homol | Rrp9   | 363134 | 1,12 | up   |
| 6370767 | 7340060 | 1720351 | ribosomal RNA processing 9, small subunit (SSU) processome component, homol | Rrp9   | 363134 | 1,24 | down |
| 6552332 | 7340060 | 1720341 | ribosomal RNA processing 9, small subunit (SSU) processome component, homol | Rrp9   | 363134 | 1,06 | down |
| 6578895 | 7340060 | 1720340 | ribosomal RNA processing 9, small subunit (SSU) processome component, homol | Rrp9   | 363134 | 2,07 | up   |
| 6581804 | 7340060 | 1720349 | ribosomal RNA processing 9, small subunit (SSU) processome component, homol | Rrp9   | 363134 | 1,13 | down |
| 6615025 | 7340060 | 1720345 | ribosomal RNA processing 9, small subunit (SSU) processome component, homol | Rrp9   | 363134 | 1,20 | up   |
| 5640790 | 7245921 | 1487694 | ribosome binding protein 1                                                  | Rrbp1  | 311483 | 1,03 | up   |
| 5687501 | 7245921 | 1487693 | ribosome binding protein 1                                                  | Rrbp1  | 311483 | 1,11 | up   |
| 5795105 | 7245921 | 1487672 | ribosome binding protein 1                                                  | Rrbp1  | 311483 | 1,06 | up   |
| 5798450 | 7245921 | 1487671 | ribosome binding protein 1                                                  | Rrbp1  | 311483 | 1,12 | down |
| 5880730 | 7245921 | 1487701 | ribosome binding protein 1                                                  | Rrbp1  | 311483 | 1,03 | up   |
| 5893070 | 7245921 | 1487709 | ribosome binding protein 1                                                  | Rrbp1  | 311483 | 1,38 | up   |
| 5909588 | 7245921 | 1487671 | ribosome binding protein 1                                                  | Rrbp1  | 311483 | 1,12 | up   |
| 5910305 | 7245921 | 1487674 | ribosome binding protein 1                                                  | Rrbp1  | 311483 | 1,10 | down |
| 5962894 | 7245921 | 1487709 | ribosome binding protein 1                                                  | Rrbp1  | 311483 | 1,01 | down |
| 5977705 | 7245921 | 1487680 | ribosome binding protein 1                                                  | Rrbp1  | 311483 | 1,13 | up   |
| 5998183 | 7245921 | 1487700 | ribosome binding protein 1                                                  | Rrbp1  | 311483 | 1,17 | up   |
| 6214167 | 7245921 | 1487671 | ribosome binding protein 1                                                  | Rrbp1  | 311483 | 1,24 | up   |
| 6234754 | 7245921 | 1487696 | ribosome binding protein 1                                                  | Rrbp1  | 311483 | 1,09 | up   |
| 6293747 | 7245921 | 1487687 | ribosome binding protein 1                                                  | Rrbp1  | 311483 | 1,00 | down |
| 6329129 | 7245921 | 1487692 | ribosome binding protein 1                                                  | Rrbp1  | 311483 | 1,13 | up   |
| 6348495 | 7245921 | 1487682 | ribosome binding protein 1                                                  | Rrbp1  | 311483 | 1,06 | up   |
| 6377121 | 7245921 | 1487677 | ribosome binding protein 1                                                  | Rrbp1  | 311483 | 1,03 | up   |
| 6393974 | 7245921 | 1487698 | ribosome binding protein 1                                                  | Rrbp1  | 311483 | 1,29 | up   |
| 6434570 | 7245921 | 1487691 | ribosome binding protein 1                                                  | Rrbp1  | 311483 | 1,29 | up   |
| 6438240 | 7245921 | 1487683 | ribosome binding protein 1                                                  | Rrbp1  | 311483 | 1,00 | up   |
| 6472392 | 7245921 | 1487678 | ribosome binding protein 1                                                  | Rrbp1  | 311483 | 1,07 | down |
| 6488741 | 7245921 | 1487679 | ribosome binding protein 1                                                  | Rrbp1  | 311483 | 1,09 | down |
| 6526504 | 7245921 | 1487686 | ribosome binding protein 1                                                  | Rrbp1  | 311483 | 1,12 | up   |
| 6580480 | 7245921 | 1487681 | ribosome binding protein 1                                                  | Rrbp1  | 311483 | 1,07 | up   |
| 6620477 | 7245921 | 1487671 | ribosome binding protein 1                                                  | Rrbp1  | 311483 | 1,03 | down |
| 6656351 | 7245921 | 1487691 | ribosome binding protein 1                                                  | Rrbp1  | 311483 | 1,49 | up   |
| 6698185 | 7245921 | 1487671 | ribosome binding protein 1                                                  | Rrbp1  | 311483 | 1,16 | up   |
| 6734115 | 7245921 | 1487684 | ribosome binding protein 1                                                  | Rrbp1  | 311483 | 1,20 | up   |
| 6744880 | 7245921 | 1487673 | ribosome binding protein 1                                                  | Rrbp1  | 311483 | 1,27 | up   |
| 5627900 | 7168309 | 1295359 | ring finger protein 125                                                     | Rnf125 | 361296 | 1,08 | down |
| 5773734 | 7168309 | 1295356 | ring finger protein 125                                                     | Rnf125 | 361296 | 1,26 | up   |
| 6058118 | 7168309 | 1295355 | ring finger protein 125                                                     | Rnf125 | 361296 | 1,75 | up   |
| 6130739 | 7168309 | 1295354 | ring finger protein 125                                                     | Rnf125 | 361296 | 3,00 | up   |
| 6270096 | 7168309 | 1295359 | ring finger protein 125                                                     | Rnf125 | 361296 | 1,03 | up   |
| 6601733 | 7168309 | 1295357 | ring finger protein 125                                                     | Rnf125 | 361296 | 1,11 | up   |
| 6653900 | 7168309 | 1295359 | ring finger protein 125                                                     | Rnf125 | 361296 | 1,14 | down |

|         |         |         |                         |        |        |      |      |
|---------|---------|---------|-------------------------|--------|--------|------|------|
| 6670858 | 7168309 | 1295358 | ring finger protein 125 | Rnf125 | 361296 | 1,22 | down |
| 5623496 | 7132125 | 1206642 | ring finger protein 17  | Rnf17  | 305908 | 1,07 | down |
| 6003857 | 7132125 | 1206597 | ring finger protein 17  | Rnf17  | 305908 | 1,51 | up   |
| 5731617 | 7083396 | 1087024 | ring finger protein 190 | Rnf190 | 303596 | 1,18 | down |
| 5852612 | 7083396 | 1087025 | ring finger protein 190 | Rnf190 | 303596 | 1,21 | up   |
| 5861091 | 7083396 | 1087017 | ring finger protein 190 | Rnf190 | 303596 | 1,34 | down |
| 5864130 | 7083396 | 1087020 | ring finger protein 190 | Rnf190 | 303596 | 1,06 | down |
| 5939029 | 7083396 | 1087017 | ring finger protein 190 | Rnf190 | 303596 | 1,38 | down |
| 5984031 | 7083396 | 1087023 | ring finger protein 190 | Rnf190 | 303596 | 1,24 | up   |
| 6064138 | 7083396 | 1087023 | ring finger protein 190 | Rnf190 | 303596 | 1,44 | down |
| 6094285 | 7083396 | 1087018 | ring finger protein 190 | Rnf190 | 303596 | 2,54 | down |
| 6104555 | 7083396 | 1087027 | ring finger protein 190 | Rnf190 | 303596 | 1,28 | down |
| 6408486 | 7083396 | 1087027 | ring finger protein 190 | Rnf190 | 303596 | 1,32 | down |
| 6428160 | 7083396 | 1087021 | ring finger protein 190 | Rnf190 | 303596 | 1,50 | down |
| 6480091 | 7083396 | 1087019 | ring finger protein 190 | Rnf190 | 303596 | 1,05 | down |
| 6482843 | 7083396 | 1087022 | ring finger protein 190 | Rnf190 | 303596 | 1,31 | up   |
| 6686844 | 7083396 | 1087026 | ring finger protein 190 | Rnf190 | 303596 | 1,05 | down |
| 5805622 | 7279793 | 1572538 | ring finger protein 19B | Rnf19b | 313806 | 1,02 | down |
| 5951610 | 7279793 | 1572540 | ring finger protein 19B | Rnf19b | 313806 | 2,72 | down |
| 6027413 | 7279793 | 1572540 | ring finger protein 19B | Rnf19b | 313806 | 2,09 | down |
| 6154882 | 7279793 | 1572531 | ring finger protein 19B | Rnf19b | 313806 | 1,02 | down |
| 6292590 | 7279793 | 1572536 | ring finger protein 19B | Rnf19b | 313806 | 1,03 | up   |
| 6322077 | 7279793 | 1572533 | ring finger protein 19B | Rnf19b | 313806 | 1,01 | down |
| 6442032 | 7279793 | 1572537 | ring finger protein 19B | Rnf19b | 313806 | 1,00 | down |
| 6548718 | 7279793 | 1572534 | ring finger protein 19B | Rnf19b | 313806 | 1,00 | up   |
| 6632127 | 7279793 | 1572535 | ring finger protein 19B | Rnf19b | 313806 | 1,17 | up   |
| 5634104 | 7073928 | 1065778 | ring finger protein 213 | Rnf213 | 303735 | 1,06 | up   |
| 5790351 | 7073898 | 1065732 | ring finger protein 213 | Rnf213 | 303735 | 3,17 | up   |
| 5838626 | 7073928 | 1065775 | ring finger protein 213 | Rnf213 | 303735 | 1,30 | down |
| 5843572 | 7073928 | 1065776 | ring finger protein 213 | Rnf213 | 303735 | 1,37 | up   |
| 6002302 | 7073928 | 1065774 | ring finger protein 213 | Rnf213 | 303735 | 1,07 | up   |
| 6005255 | 7073898 | 1065737 | ring finger protein 213 | Rnf213 | 303735 | 1,24 | down |
| 6099918 | 7073928 | 1065773 | ring finger protein 213 | Rnf213 | 303735 | 1,30 | down |
| 6507075 | 7073928 | 1065777 | ring finger protein 213 | Rnf213 | 303735 | 1,73 | down |
| 5684099 | 7363768 | 1778595 | ring finger protein 25  | Rnf25  | 301515 | 1,04 | down |
| 5856087 | 7363768 | 1778601 | ring finger protein 25  | Rnf25  | 301515 | 1,04 | up   |
| 5999179 | 7363768 | 1778595 | ring finger protein 25  | Rnf25  | 301515 | 1,48 | up   |
| 6268971 | 7363768 | 1778598 | ring finger protein 25  | Rnf25  | 301515 | 1,30 | down |
| 6384244 | 7363768 | 1778597 | ring finger protein 25  | Rnf25  | 301515 | 1,28 | up   |
| 6390688 | 7363768 | 1778600 | ring finger protein 25  | Rnf25  | 301515 | 1,15 | up   |
| 6465785 | 7363768 | 1778604 | ring finger protein 25  | Rnf25  | 301515 | 1,03 | up   |
| 6521842 | 7363768 | 1778602 | ring finger protein 25  | Rnf25  | 301515 | 1,05 | up   |
| 6559821 | 7363768 | 1778601 | ring finger protein 25  | Rnf25  | 301515 | 1,06 | up   |
| 6656575 | 7363768 | 1778599 | ring finger protein 25  | Rnf25  | 301515 | 2,41 | down |
| 6710573 | 7363768 | 1778596 | ring finger protein 25  | Rnf25  | 301515 | 1,58 | up   |
| 5619947 | 7167883 | 1294112 | RIO kinase 3 (yeast)    | Riok3  | 361293 | 1,36 | down |
| 5875746 | 7167883 | 1294111 | RIO kinase 3 (yeast)    | Riok3  | 361293 | 1,03 | up   |
| 5999153 | 7167883 | 1294106 | RIO kinase 3 (yeast)    | Riok3  | 361293 | 1,13 | up   |
| 5999430 | 7167883 | 1294098 | RIO kinase 3 (yeast)    | Riok3  | 361293 | 2,00 | down |
| 6007063 | 7167883 | 1294105 | RIO kinase 3 (yeast)    | Riok3  | 361293 | 1,01 | up   |
| 6182523 | 7167883 | 1294099 | RIO kinase 3 (yeast)    | Riok3  | 361293 | 1,39 | up   |
| 6226216 | 7167883 | 1294108 | RIO kinase 3 (yeast)    | Riok3  | 361293 | 1,02 | down |
| 6247240 | 7167883 | 1294109 | RIO kinase 3 (yeast)    | Riok3  | 361293 | 1,30 | down |
| 6326369 | 7167883 | 1294108 | RIO kinase 3 (yeast)    | Riok3  | 361293 | 1,25 | down |
| 6339360 | 7167883 | 1294101 | RIO kinase 3 (yeast)    | Riok3  | 361293 | 1,08 | up   |
| 6411742 | 7167883 | 1294101 | RIO kinase 3 (yeast)    | Riok3  | 361293 | 1,37 | up   |

|         |         |         |                               |        |        |      |      |
|---------|---------|---------|-------------------------------|--------|--------|------|------|
| 6426418 | 7167883 | 1294103 | RIO kinase 3 (yeast)          | Riok3  | 361293 | 1,14 | down |
| 6431988 | 7167883 | 1294102 | RIO kinase 3 (yeast)          | Riok3  | 361293 | 1,08 | up   |
| 6605391 | 7167883 | 1294104 | RIO kinase 3 (yeast)          | Riok3  | 361293 | 1,01 | down |
| 6612086 | 7167883 | 1294107 | RIO kinase 3 (yeast)          | Riok3  | 361293 | 1,11 | up   |
| 6630100 | 7167883 | 1294098 | RIO kinase 3 (yeast)          | Riok3  | 361293 | 1,08 | up   |
| 6715990 | 7167883 | 1294112 | RIO kinase 3 (yeast)          | Riok3  | 361293 | 1,23 | down |
| 5648710 | 7272824 | 1554963 | RNA binding motif protein 12B | Rbm12b | 313069 | 2,10 | down |
| 5827627 | 7272824 | 1554961 | RNA binding motif protein 12B | Rbm12b | 313069 | 1,36 | up   |
| 6338733 | 7272824 | 1554960 | RNA binding motif protein 12B | Rbm12b | 313069 | 1,47 | up   |
| 5698594 | 7237992 | 1468289 | RNA binding motif protein 18  | Rbm18  | 311902 | 1,21 | down |
| 5765391 | 7237992 | 1468281 | RNA binding motif protein 18  | Rbm18  | 311902 | 1,10 | up   |
| 5780927 | 7237992 | 1468283 | RNA binding motif protein 18  | Rbm18  | 311902 | 1,21 | down |
| 6023981 | 7237992 | 1468284 | RNA binding motif protein 18  | Rbm18  | 311902 | 1,27 | down |
| 6024792 | 7237992 | 1468289 | RNA binding motif protein 18  | Rbm18  | 311902 | 1,33 | down |
| 6177940 | 7237992 | 1468290 | RNA binding motif protein 18  | Rbm18  | 311902 | 1,12 | up   |
| 6295456 | 7237992 | 1468281 | RNA binding motif protein 18  | Rbm18  | 311902 | 1,20 | down |
| 6352861 | 7237992 | 1468290 | RNA binding motif protein 18  | Rbm18  | 311902 | 1,36 | up   |
| 6544988 | 7237992 | 1468290 | RNA binding motif protein 18  | Rbm18  | 311902 | 2,10 | down |
| 6695505 | 7237992 | 1468284 | RNA binding motif protein 18  | Rbm18  | 311902 | 1,18 | down |
| 6741736 | 7237992 | 1468282 | RNA binding motif protein 18  | Rbm18  | 311902 | 1,03 | down |
| 5642966 | 7102510 | 1133844 | RNA binding motif protein 19  | Rbm19  | 304512 | 1,04 | up   |
| 5803706 | 7102510 | 1133879 | RNA binding motif protein 19  | Rbm19  | 304512 | 1,45 | down |
| 5827560 | 7102510 | 1133868 | RNA binding motif protein 19  | Rbm19  | 304512 | 1,10 | down |
| 5861367 | 7102510 | 1133867 | RNA binding motif protein 19  | Rbm19  | 304512 | 2,15 | down |
| 5915230 | 7102510 | 1133887 | RNA binding motif protein 19  | Rbm19  | 304512 | 1,13 | up   |
| 5935299 | 7102510 | 1133887 | RNA binding motif protein 19  | Rbm19  | 304512 | 1,23 | up   |
| 5937402 | 7102510 | 1133872 | RNA binding motif protein 19  | Rbm19  | 304512 | 1,19 | down |
| 6039142 | 7102510 | 1133864 | RNA binding motif protein 19  | Rbm19  | 304512 | 1,21 | down |
| 6061959 | 7102510 | 1133883 | RNA binding motif protein 19  | Rbm19  | 304512 | 1,12 | up   |
| 6123859 | 7102510 | 1133882 | RNA binding motif protein 19  | Rbm19  | 304512 | 1,21 | up   |
| 6139484 | 7102510 | 1133884 | RNA binding motif protein 19  | Rbm19  | 304512 | 2,00 | up   |
| 6166001 | 7102510 | 1133886 | RNA binding motif protein 19  | Rbm19  | 304512 | 1,28 | up   |
| 6198481 | 7102510 | 1133885 | RNA binding motif protein 19  | Rbm19  | 304512 | 1,01 | up   |
| 6229959 | 7102510 | 1133849 | RNA binding motif protein 19  | Rbm19  | 304512 | 1,29 | down |
| 6314121 | 7102510 | 1133882 | RNA binding motif protein 19  | Rbm19  | 304512 | 1,11 | down |
| 6321402 | 7102510 | 1133880 | RNA binding motif protein 19  | Rbm19  | 304512 | 1,85 | up   |
| 6344863 | 7102510 | 1133840 | RNA binding motif protein 19  | Rbm19  | 304512 | 1,69 | up   |
| 6513149 | 7102510 | 1133839 | RNA binding motif protein 19  | Rbm19  | 304512 | 1,70 | down |
| 6531125 | 7102510 | 1133871 | RNA binding motif protein 19  | Rbm19  | 304512 | 1,12 | up   |
| 6546536 | 7102510 | 1133865 | RNA binding motif protein 19  | Rbm19  | 304512 | 1,56 | up   |
| 6569216 | 7102510 | 1133873 | RNA binding motif protein 19  | Rbm19  | 304512 | 1,13 | up   |
| 6580462 | 7102510 | 1133866 | RNA binding motif protein 19  | Rbm19  | 304512 | 1,32 | up   |
| 6618594 | 7102510 | 1133868 | RNA binding motif protein 19  | Rbm19  | 304512 | 1,02 | down |
| 6688048 | 7102510 | 1133877 | RNA binding motif protein 19  | Rbm19  | 304512 | 1,36 | up   |
| 6696736 | 7102510 | 1133878 | RNA binding motif protein 19  | Rbm19  | 304512 | 1,48 | up   |
| 5676430 | 7186753 | 1341989 | RNA binding motif protein 34  | Rbm34  | 307956 | 1,56 | up   |
| 5678903 | 7186753 | 1341992 | RNA binding motif protein 34  | Rbm34  | 307956 | 1,39 | down |
| 5681944 | 7186753 | 1341996 | RNA binding motif protein 34  | Rbm34  | 307956 | 1,00 | down |
| 5929908 | 7186753 | 1341995 | RNA binding motif protein 34  | Rbm34  | 307956 | 1,14 | up   |
| 5956353 | 7186753 | 1341997 | RNA binding motif protein 34  | Rbm34  | 307956 | 1,09 | down |
| 6011592 | 7186753 | 1341991 | RNA binding motif protein 34  | Rbm34  | 307956 | 1,07 | up   |
| 6136654 | 7186753 | 1341988 | RNA binding motif protein 34  | Rbm34  | 307956 | 1,54 | down |
| 6143333 | 7186753 | 1341993 | RNA binding motif protein 34  | Rbm34  | 307956 | 1,68 | up   |
| 6197563 | 7186753 | 1341987 | RNA binding motif protein 34  | Rbm34  | 307956 | 1,20 | down |
| 6219776 | 7186753 | 1341995 | RNA binding motif protein 34  | Rbm34  | 307956 | 1,00 | down |
| 6258506 | 7186753 | 1341990 | RNA binding motif protein 34  | Rbm34  | 307956 | 2,18 | up   |

|         |         |         |                                                          |       |        |      |      |
|---------|---------|---------|----------------------------------------------------------|-------|--------|------|------|
| 6344948 | 7186753 | 1341994 | RNA binding motif protein 34                             | Rbm34 | 307956 | 1,03 | down |
| 6349843 | 7186753 | 1341985 | RNA binding motif protein 34                             | Rbm34 | 307956 | 1,48 | down |
| 6579585 | 7186753 | 1341993 | RNA binding motif protein 34                             | Rbm34 | 307956 | 1,21 | up   |
| 6655306 | 7186753 | 1341986 | RNA binding motif protein 34                             | Rbm34 | 307956 | 1,14 | down |
| 5626912 | 7238826 | 1470535 | RNA binding motif protein 43                             | Rbm43 | 311020 | 1,07 | up   |
| 5633768 | 7238826 | 1470535 | RNA binding motif protein 43                             | Rbm43 | 311020 | 1,14 | down |
| 5848601 | 7238826 | 1470531 | RNA binding motif protein 43                             | Rbm43 | 311020 | 1,37 | up   |
| 5860056 | 7238826 | 1470531 | RNA binding motif protein 43                             | Rbm43 | 311020 | 1,68 | up   |
| 6154089 | 7238826 | 1470531 | RNA binding motif protein 43                             | Rbm43 | 311020 | 1,09 | down |
| 6410141 | 7238826 | 1470530 | RNA binding motif protein 43                             | Rbm43 | 311020 | 1,44 | up   |
| 6461772 | 7238826 | 1470537 | RNA binding motif protein 43                             | Rbm43 | 311020 | 1,44 | up   |
| 5653927 | 7210135 | 1399464 | RNA binding motif protein 46                             | Rbm46 | 310548 | 1,29 | down |
| 6189730 | 7210135 | 1399460 | RNA binding motif protein 46                             | Rbm46 | 310548 | 1,01 | up   |
| 6355302 | 7210135 | 1399456 | RNA binding motif protein 46                             | Rbm46 | 310548 | 1,06 | up   |
| 6612006 | 7210135 | 1399459 | RNA binding motif protein 46                             | Rbm46 | 310548 | 1,01 | up   |
| 5621469 | 7349946 | 1744949 | RNA binding motif protein 5                              | Rbm5  | 300996 | 1,18 | up   |
| 5656138 | 7349946 | 1744934 | RNA binding motif protein 5                              | Rbm5  | 300996 | 2,21 | up   |
| 5706637 | 7349946 | 1744953 | RNA binding motif protein 5                              | Rbm5  | 300996 | 1,10 | up   |
| 5730056 | 7349946 | 1744941 | RNA binding motif protein 5                              | Rbm5  | 300996 | 1,16 | down |
| 5731294 | 7349946 | 1744945 | RNA binding motif protein 5                              | Rbm5  | 300996 | 1,01 | down |
| 5736755 | 7349946 | 1744940 | RNA binding motif protein 5                              | Rbm5  | 300996 | 1,27 | up   |
| 5750501 | 7349946 | 1744951 | RNA binding motif protein 5                              | Rbm5  | 300996 | 1,19 | up   |
| 5886043 | 7349946 | 1744937 | RNA binding motif protein 5                              | Rbm5  | 300996 | 1,41 | up   |
| 5916251 | 7349946 | 1744939 | RNA binding motif protein 5                              | Rbm5  | 300996 | 1,17 | down |
| 5938273 | 7349946 | 1744934 | RNA binding motif protein 5                              | Rbm5  | 300996 | 1,11 | up   |
| 6040525 | 7349946 | 1744936 | RNA binding motif protein 5                              | Rbm5  | 300996 | 1,69 | down |
| 6115380 | 7349946 | 1744942 | RNA binding motif protein 5                              | Rbm5  | 300996 | 1,14 | down |
| 6131127 | 7349946 | 1744947 | RNA binding motif protein 5                              | Rbm5  | 300996 | 1,04 | up   |
| 6176292 | 7349946 | 1744935 | RNA binding motif protein 5                              | Rbm5  | 300996 | 1,26 | up   |
| 6218482 | 7349946 | 1744941 | RNA binding motif protein 5                              | Rbm5  | 300996 | 1,09 | up   |
| 6223311 | 7349946 | 1744935 | RNA binding motif protein 5                              | Rbm5  | 300996 | 1,04 | up   |
| 6241955 | 7349946 | 1744948 | RNA binding motif protein 5                              | Rbm5  | 300996 | 1,15 | up   |
| 6281226 | 7349946 | 1744943 | RNA binding motif protein 5                              | Rbm5  | 300996 | 1,16 | up   |
| 6295223 | 7349946 | 1744956 | RNA binding motif protein 5                              | Rbm5  | 300996 | 1,00 | down |
| 6319238 | 7349946 | 1744955 | RNA binding motif protein 5                              | Rbm5  | 300996 | 1,00 | down |
| 6399782 | 7349946 | 1744951 | RNA binding motif protein 5                              | Rbm5  | 300996 | 1,01 | down |
| 6537364 | 7349946 | 1744950 | RNA binding motif protein 5                              | Rbm5  | 300996 | 1,21 | down |
| 6625830 | 7349946 | 1744946 | RNA binding motif protein 5                              | Rbm5  | 300996 | 1,15 | up   |
| 6663235 | 7349946 | 1744937 | RNA binding motif protein 5                              | Rbm5  | 300996 | 1,11 | up   |
| 6726756 | 7349946 | 1744944 | RNA binding motif protein 5                              | Rbm5  | 300996 | 1,01 | down |
| 6735041 | 7349946 | 1744938 | RNA binding motif protein 5                              | Rbm5  | 300996 | 1,14 | up   |
| 6746012 | 7349946 | 1744954 | RNA binding motif protein 5                              | Rbm5  | 300996 | 1,10 | down |
| 5620829 | 7377513 | 1815296 | RNA binding motif protein, X-linked 2                    | Rbmx2 | 367930 | 1,14 | down |
| 5697166 | 7377513 | 1815293 | RNA binding motif protein, X-linked 2                    | Rbmx2 | 367930 | 1,13 | down |
| 5832678 | 7377513 | 1815296 | RNA binding motif protein, X-linked 2                    | Rbmx2 | 367930 | 1,05 | down |
| 6188658 | 7377513 | 1815296 | RNA binding motif protein, X-linked 2                    | Rbmx2 | 367930 | 1,21 | up   |
| 6424669 | 7377513 | 1815292 | RNA binding motif protein, X-linked 2                    | Rbmx2 | 367930 | 2,33 | up   |
| 6428711 | 7377513 | 1815293 | RNA binding motif protein, X-linked 2                    | Rbmx2 | 367930 | 1,30 | up   |
| 6555069 | 7377513 | 1815291 | RNA binding motif protein, X-linked 2                    | Rbmx2 | 367930 | 1,41 | down |
| 6636160 | 7377513 | 1815294 | RNA binding motif protein, X-linked 2                    | Rbmx2 | 367930 | 1,26 | up   |
| 6656390 | 7377513 | 1815296 | RNA binding motif protein, X-linked 2                    | Rbmx2 | 367930 | 1,12 | up   |
| 5722592 | 7239391 | 1472256 | RNA binding motif, single stranded interacting protein 1 | Rbms1 | 362138 | 1,87 | down |
| 5762798 | 7239391 | 1472248 | RNA binding motif, single stranded interacting protein 1 | Rbms1 | 362138 | 1,05 | up   |
| 5770536 | 7239391 | 1472250 | RNA binding motif, single stranded interacting protein 1 | Rbms1 | 362138 | 1,26 | up   |
| 5958131 | 7239391 | 1472253 | RNA binding motif, single stranded interacting protein 1 | Rbms1 | 362138 | 1,06 | up   |
| 5977826 | 7239391 | 1472256 | RNA binding motif, single stranded interacting protein 1 | Rbms1 | 362138 | 1,51 | up   |

|         |         |         |                                                          |       |        |      |      |
|---------|---------|---------|----------------------------------------------------------|-------|--------|------|------|
| 5985969 | 7239391 | 1472258 | RNA binding motif, single stranded interacting protein 1 | Rbms1 | 362138 | 1,23 | up   |
| 6021182 | 7239391 | 1472255 | RNA binding motif, single stranded interacting protein 1 | Rbms1 | 362138 | 1,24 | up   |
| 6054368 | 7239391 | 1472246 | RNA binding motif, single stranded interacting protein 1 | Rbms1 | 362138 | 1,10 | down |
| 6062887 | 7239391 | 1472257 | RNA binding motif, single stranded interacting protein 1 | Rbms1 | 362138 | 2,73 | down |
| 6137946 | 7239391 | 1472247 | RNA binding motif, single stranded interacting protein 1 | Rbms1 | 362138 | 1,14 | up   |
| 6141977 | 7239391 | 1472244 | RNA binding motif, single stranded interacting protein 1 | Rbms1 | 362138 | 1,77 | down |
| 6229650 | 7239391 | 1472244 | RNA binding motif, single stranded interacting protein 1 | Rbms1 | 362138 | 1,10 | down |
| 6276797 | 7239391 | 1472254 | RNA binding motif, single stranded interacting protein 1 | Rbms1 | 362138 | 1,10 | up   |
| 6307046 | 7239391 | 1472245 | RNA binding motif, single stranded interacting protein 1 | Rbms1 | 362138 | 1,21 | down |
| 6351147 | 7239391 | 1472253 | RNA binding motif, single stranded interacting protein 1 | Rbms1 | 362138 | 1,09 | down |
| 6593875 | 7239391 | 1472251 | RNA binding motif, single stranded interacting protein 1 | Rbms1 | 362138 | 1,10 | down |
| 6673532 | 7239391 | 1472249 | RNA binding motif, single stranded interacting protein 1 | Rbms1 | 362138 | 1,19 | up   |
| 6722358 | 7239391 | 1472252 | RNA binding motif, single stranded interacting protein 1 | Rbms1 | 362138 | 1,07 | up   |
| 5624945 | 7243628 | 1482390 | RNA polymerase II associated protein 1                   | Rpap1 | 311338 | 1,42 | down |
| 5778189 | 7243628 | 1482363 | RNA polymerase II associated protein 1                   | Rpap1 | 311338 | 1,05 | down |
| 5791392 | 7243628 | 1482390 | RNA polymerase II associated protein 1                   | Rpap1 | 311338 | 1,53 | up   |
| 5796770 | 7243628 | 1482380 | RNA polymerase II associated protein 1                   | Rpap1 | 311338 | 1,51 | up   |
| 5859430 | 7243628 | 1482374 | RNA polymerase II associated protein 1                   | Rpap1 | 311338 | 1,16 | down |
| 5870371 | 7243628 | 1482386 | RNA polymerase II associated protein 1                   | Rpap1 | 311338 | 1,16 | down |
| 5873028 | 7243628 | 1482381 | RNA polymerase II associated protein 1                   | Rpap1 | 311338 | 1,03 | down |
| 5884089 | 7243628 | 1482369 | RNA polymerase II associated protein 1                   | Rpap1 | 311338 | 1,52 | down |
| 5992194 | 7243628 | 1482363 | RNA polymerase II associated protein 1                   | Rpap1 | 311338 | 1,21 | up   |
| 6088466 | 7243628 | 1482375 | RNA polymerase II associated protein 1                   | Rpap1 | 311338 | 1,23 | down |
| 6172423 | 7243628 | 1482378 | RNA polymerase II associated protein 1                   | Rpap1 | 311338 | 1,09 | up   |
| 6182194 | 7243628 | 1482364 | RNA polymerase II associated protein 1                   | Rpap1 | 311338 | 1,00 | down |
| 6254383 | 7243628 | 1482369 | RNA polymerase II associated protein 1                   | Rpap1 | 311338 | 1,50 | down |
| 6259910 | 7243628 | 1482376 | RNA polymerase II associated protein 1                   | Rpap1 | 311338 | 1,27 | up   |
| 6343239 | 7243628 | 1482389 | RNA polymerase II associated protein 1                   | Rpap1 | 311338 | 1,18 | down |
| 6357185 | 7243628 | 1482372 | RNA polymerase II associated protein 1                   | Rpap1 | 311338 | 1,21 | up   |
| 6371071 | 7243628 | 1482379 | RNA polymerase II associated protein 1                   | Rpap1 | 311338 | 1,14 | up   |
| 6449191 | 7243628 | 1482385 | RNA polymerase II associated protein 1                   | Rpap1 | 311338 | 1,07 | up   |
| 6469732 | 7243628 | 1482367 | RNA polymerase II associated protein 1                   | Rpap1 | 311338 | 1,13 | down |
| 6476109 | 7243628 | 1482368 | RNA polymerase II associated protein 1                   | Rpap1 | 311338 | 1,04 | up   |
| 6502135 | 7243628 | 1482373 | RNA polymerase II associated protein 1                   | Rpap1 | 311338 | 1,01 | down |
| 6533442 | 7243628 | 1482383 | RNA polymerase II associated protein 1                   | Rpap1 | 311338 | 1,23 | down |
| 6534893 | 7243628 | 1482385 | RNA polymerase II associated protein 1                   | Rpap1 | 311338 | 1,61 | up   |
| 6540449 | 7243628 | 1482389 | RNA polymerase II associated protein 1                   | Rpap1 | 311338 | 1,11 | down |
| 6570394 | 7243628 | 1482383 | RNA polymerase II associated protein 1                   | Rpap1 | 311338 | 1,12 | up   |
| 6639725 | 7243628 | 1482377 | RNA polymerase II associated protein 1                   | Rpap1 | 311338 | 1,02 | up   |
| 6663711 | 7243628 | 1482370 | RNA polymerase II associated protein 1                   | Rpap1 | 311338 | 1,09 | down |
| 6677929 | 7243628 | 1482388 | RNA polymerase II associated protein 1                   | Rpap1 | 311338 | 1,19 | up   |
| 6680731 | 7243628 | 1482371 | RNA polymerase II associated protein 1                   | Rpap1 | 311338 | 1,13 | up   |
| 6717757 | 7243628 | 1482387 | RNA polymerase II associated protein 1                   | Rpap1 | 311338 | 2,27 | down |
| 6727492 | 7243628 | 1482364 | RNA polymerase II associated protein 1                   | Rpap1 | 311338 | 2,24 | down |
| 6743496 | 7243628 | 1482389 | RNA polymerase II associated protein 1                   | Rpap1 | 311338 | 1,03 | down |
| 5618203 | 7172988 | 1307286 | rotatin                                                  | Rttt  | 291377 | 1,02 | down |
| 5620658 | 7172988 | 1307296 | rotatin                                                  | Rttt  | 291377 | 1,13 | down |
| 5631239 | 7172988 | 1307300 | rotatin                                                  | Rttt  | 291377 | 1,14 | up   |
| 5631632 | 7172988 | 1307320 | rotatin                                                  | Rttt  | 291377 | 1,15 | down |
| 5677197 | 7172988 | 1307299 | rotatin                                                  | Rttt  | 291377 | 1,02 | up   |
| 5690555 | 7172988 | 1307333 | rotatin                                                  | Rttt  | 291377 | 1,78 | down |
| 5703872 | 7172988 | 1307339 | rotatin                                                  | Rttt  | 291377 | 1,00 | up   |
| 5716185 | 7172988 | 1307286 | rotatin                                                  | Rttt  | 291377 | 1,99 | down |
| 5721923 | 7172988 | 1307338 | rotatin                                                  | Rttt  | 291377 | 1,12 | up   |
| 5750036 | 7172988 | 1307287 | rotatin                                                  | Rttt  | 291377 | 1,09 | down |
| 5753601 | 7172988 | 1307308 | rotatin                                                  | Rttt  | 291377 | 1,05 | down |



|         |         |         |                                                                                                                                     |                                      |      |      |
|---------|---------|---------|-------------------------------------------------------------------------------------------------------------------------------------|--------------------------------------|------|------|
| 6390118 | 7216994 | 1415203 | RT1 class I, A3 /// RT1 class Ib, locus Aw2 /// RT1 class Ia, locus A1 /// RT1 class I, locus Aw2 /// RT1-A: /// 24737 /// 24973 // | 1,03                                 | up   |      |
| 6558486 | 7220575 | 1424341 | RT1 class I, CE1                                                                                                                    | RT1-CE1 309603                       | 1,08 | up   |
| 5683833 | 7216676 | 1414436 | RT1 class I, CE10                                                                                                                   | RT1-CE10 414792                      | 1,35 | down |
| 5757365 | 7216676 | 1414431 | RT1 class I, CE10                                                                                                                   | RT1-CE10 414792                      | 1,42 | up   |
| 5760457 | 7216676 | 1414437 | RT1 class I, CE10                                                                                                                   | RT1-CE10 414792                      | 1,93 | down |
| 5810863 | 7216676 | 1414430 | RT1 class I, CE10                                                                                                                   | RT1-CE10 414792                      | 1,38 | down |
| 5997498 | 7216676 | 1414433 | RT1 class I, CE10                                                                                                                   | RT1-CE10 414792                      | 1,06 | up   |
| 6021180 | 7216676 | 1414431 | RT1 class I, CE10                                                                                                                   | RT1-CE10 414792                      | 1,31 | up   |
| 6193899 | 7216676 | 1414435 | RT1 class I, CE10                                                                                                                   | RT1-CE10 414792                      | 1,19 | down |
| 6392290 | 7216676 | 1414432 | RT1 class I, CE10                                                                                                                   | RT1-CE10 414792                      | 1,41 | up   |
| 6484766 | 7216676 | 1414434 | RT1 class I, CE10                                                                                                                   | RT1-CE10 414792                      | 1,06 | up   |
| 6535134 | 7216676 | 1414438 | RT1 class I, CE10                                                                                                                   | RT1-CE10 414792                      | 1,02 | down |
| 5791018 | 7224452 | 1433365 | RT1 class I, CE11                                                                                                                   | RT1-CE11 414791                      | 1,06 | down |
| 6306632 | 7224452 | 1433363 | RT1 class I, CE11                                                                                                                   | RT1-CE11 414791                      | 2,14 | down |
| 6418391 | 7224452 | 1433366 | RT1 class I, CE11                                                                                                                   | RT1-CE11 414791                      | 1,99 | up   |
| 6501547 | 7224452 | 1433368 | RT1 class I, CE11                                                                                                                   | RT1-CE11 414791                      | 2,14 | down |
| 5655738 | 7224452 | 1433362 | RT1 class I, CE11 /// RT1 class I, CE7                                                                                              | T1-CE11 /// RT1-CF 414791 /// 368153 | 1,96 | down |
| 5744477 | 7216676 | 1414422 | RT1 class I, CE11 /// RT1 class I, CE7                                                                                              | T1-CE11 /// RT1-CF 414791 /// 368153 | 1,20 | up   |
| 5951170 | 7224452 | 1433364 | RT1 class I, CE11 /// RT1 class I, CE7                                                                                              | T1-CE11 /// RT1-CF 414791 /// 368153 | 4,19 | up   |
| 6366394 | 7216676 | 1414423 | RT1 class I, CE11 /// RT1 class I, CE7                                                                                              | T1-CE11 /// RT1-CF 414791 /// 368153 | 1,94 | up   |
| 6611280 | 7216676 | 1414421 | RT1 class I, CE11 /// RT1 class I, CE7                                                                                              | T1-CE11 /// RT1-CF 414791 /// 368153 | 2,22 | down |
| 5631415 | 7220575 | 1424342 | RT1 class I, CE12 /// RT1 class I, CE1                                                                                              | T1-CE12 /// RT1-CF 309600 /// 309603 | 2,04 | down |
| 5694781 | 7224458 | 1433375 | RT1 class I, CE12 /// RT1 class I, CE1                                                                                              | T1-CE12 /// RT1-CF 309600 /// 309603 | 1,16 | up   |
| 5739283 | 7224458 | 1433377 | RT1 class I, CE12 /// RT1 class I, CE1                                                                                              | T1-CE12 /// RT1-CF 309600 /// 309603 | 1,16 | down |
| 5812397 | 7224458 | 1433374 | RT1 class I, CE12 /// RT1 class I, CE1                                                                                              | T1-CE12 /// RT1-CF 309600 /// 309603 | 3,41 | down |
| 5947647 | 7220575 | 1424346 | RT1 class I, CE12 /// RT1 class I, CE1                                                                                              | T1-CE12 /// RT1-CF 309600 /// 309603 | 3,22 | down |
| 6077361 | 7220575 | 1424345 | RT1 class I, CE12 /// RT1 class I, CE1                                                                                              | T1-CE12 /// RT1-CF 309600 /// 309603 | 1,14 | down |
| 6191641 | 7220575 | 1424340 | RT1 class I, CE12 /// RT1 class I, CE1                                                                                              | T1-CE12 /// RT1-CF 309600 /// 309603 | 1,20 | up   |
| 6449932 | 7224458 | 1433378 | RT1 class I, CE12 /// RT1 class I, CE1                                                                                              | T1-CE12 /// RT1-CF 309600 /// 309603 | 1,03 | down |
| 6503026 | 7224458 | 1433379 | RT1 class I, CE12 /// RT1 class I, CE1                                                                                              | T1-CE12 /// RT1-CF 309600 /// 309603 | 1,19 | up   |
| 6567436 | 7220575 | 1424344 | RT1 class I, CE12 /// RT1 class I, CE1                                                                                              | T1-CE12 /// RT1-CF 309600 /// 309603 | 1,25 | up   |
| 6631219 | 7224458 | 1433376 | RT1 class I, CE12 /// RT1 class I, CE1                                                                                              | T1-CE12 /// RT1-CF 309600 /// 309603 | 1,51 | up   |
| 6677804 | 7220575 | 1424343 | RT1 class I, CE12 /// RT1 class I, CE1                                                                                              | T1-CE12 /// RT1-CF 309600 /// 309603 | 1,20 | up   |
| 5726291 | 7224429 | 1433327 | RT1 class I, CE13                                                                                                                   | RT1-CE13 414790                      | 2,50 | down |
| 5974309 | 7224429 | 1433329 | RT1 class I, CE13                                                                                                                   | RT1-CE13 414790                      | 1,31 | down |
| 6095052 | 7224429 | 1433331 | RT1 class I, CE13                                                                                                                   | RT1-CE13 414790                      | 1,18 | up   |
| 6154595 | 7224429 | 1433328 | RT1 class I, CE13                                                                                                                   | RT1-CE13 414790                      | 1,70 | up   |
| 6433164 | 7224429 | 1433332 | RT1 class I, CE13                                                                                                                   | RT1-CE13 414790                      | 2,06 | down |
| 6480762 | 7224429 | 1433326 | RT1 class I, CE13                                                                                                                   | RT1-CE13 414790                      | 1,34 | down |
| 6512034 | 7224429 | 1433329 | RT1 class I, CE13                                                                                                                   | RT1-CE13 414790                      | 1,02 | down |
| 6530313 | 7224429 | 1433330 | RT1 class I, CE13                                                                                                                   | RT1-CE13 414790                      | 2,53 | up   |
| 5627628 | 7224429 | 1433336 | RT1 class I, CE14                                                                                                                   | RT1-CE14 414270                      | 1,04 | up   |
| 5840800 | 7224429 | 1433334 | RT1 class I, CE14                                                                                                                   | RT1-CE14 414270                      | 1,04 | up   |
| 5875739 | 7224429 | 1433337 | RT1 class I, CE14                                                                                                                   | RT1-CE14 414270                      | 2,56 | up   |
| 6309097 | 7224429 | 1433333 | RT1 class I, CE14                                                                                                                   | RT1-CE14 414270                      | 1,57 | up   |
| 6645381 | 7224429 | 1433333 | RT1 class I, CE14                                                                                                                   | RT1-CE14 414270                      | 2,13 | up   |
| 6703942 | 7224429 | 1433335 | RT1 class I, CE14                                                                                                                   | RT1-CE14 414270                      | 1,15 | up   |
| 6728037 | 7224429 | 1433335 | RT1 class I, CE14                                                                                                                   | RT1-CE14 414270                      | 2,51 | down |
| 5883384 | 7224511 | 1433492 | RT1 class I, CE15                                                                                                                   | RT1-CE15 414789                      | 1,29 | up   |
| 5886649 | 7224511 | 1433489 | RT1 class I, CE15                                                                                                                   | RT1-CE15 414789                      | 1,25 | down |
| 5967519 | 7224511 | 1433490 | RT1 class I, CE15                                                                                                                   | RT1-CE15 414789                      | 1,40 | down |
| 6149192 | 7224511 | 1433494 | RT1 class I, CE15                                                                                                                   | RT1-CE15 414789                      | 1,80 | down |
| 6183578 | 7224511 | 1433488 | RT1 class I, CE15                                                                                                                   | RT1-CE15 414789                      | 2,38 | up   |
| 6423532 | 7224511 | 1433491 | RT1 class I, CE15                                                                                                                   | RT1-CE15 414789                      | 1,23 | down |
| 6715287 | 7224511 | 1433493 | RT1 class I, CE15                                                                                                                   | RT1-CE15 414789                      | 2,15 | down |
| 5816043 | 7220541 | 1424280 | RT1 class I, CE15 /// RT1 class I, CE4                                                                                              | T1-CE15 /// RT1-CF 414789 /// 414783 | 2,35 | up   |



|         |         |         |                                                                                                                                |                                                 |      |      |
|---------|---------|---------|--------------------------------------------------------------------------------------------------------------------------------|-------------------------------------------------|------|------|
| 5984837 | 7220541 | 1424282 | RT1 class I, CE15 /// RT1 class I, CE4                                                                                         | T1-CE15 /// RT1-CF 414789 /// 414783            | 1,14 | down |
| 5634031 | 7224499 | 1433474 | RT1 class I, CE16                                                                                                              | RT1-CE16 414819                                 | 1,18 | up   |
| 5738295 | 7224499 | 1433472 | RT1 class I, CE16                                                                                                              | RT1-CE16 414819                                 | 1,34 | up   |
| 5744921 | 7224499 | 1433476 | RT1 class I, CE16                                                                                                              | RT1-CE16 414819                                 | 1,29 | up   |
| 5807453 | 7224499 | 1433475 | RT1 class I, CE16                                                                                                              | RT1-CE16 414819                                 | 1,31 | down |
| 6363272 | 7224499 | 1433471 | RT1 class I, CE16                                                                                                              | RT1-CE16 414819                                 | 2,54 | down |
| 6404629 | 7224499 | 1433469 | RT1 class I, CE16                                                                                                              | RT1-CE16 414819                                 | 1,15 | up   |
| 6411112 | 7224499 | 1433475 | RT1 class I, CE16                                                                                                              | RT1-CE16 414819                                 | 2,61 | down |
| 6555679 | 7224499 | 1433475 | RT1 class I, CE16                                                                                                              | RT1-CE16 414819                                 | 2,11 | down |
| 6649632 | 7224499 | 1433475 | RT1 class I, CE16                                                                                                              | RT1-CE16 414819                                 | 1,36 | down |
| 6634328 | 7224499 | 1433470 | RT1 class I, CE16 /// RT1 class Ib, locus Aw2                                                                                  | T1-CE16 /// RT1-Av 414819 /// 24737             | 1,71 | up   |
| 6643385 | 7224499 | 1433473 | RT1 class I, CE16 /// RT1 class Ib, locus Aw2                                                                                  | T1-CE16 /// RT1-Av 414819 /// 24737             | 1,08 | up   |
| 5662898 | 7220557 | 1424312 | RT1 class I, CE3                                                                                                               | RT1-CE3 414793                                  | 2,21 | down |
| 5712333 | 7220557 | 1424313 | RT1 class I, CE3                                                                                                               | RT1-CE3 414793                                  | 2,33 | down |
| 5985707 | 7220557 | 1424314 | RT1 class I, CE3                                                                                                               | RT1-CE3 414793                                  | 1,98 | up   |
| 6049840 | 7220557 | 1424311 | RT1 class I, CE3                                                                                                               | RT1-CE3 414793                                  | 1,43 | up   |
| 6080207 | 7220557 | 1424313 | RT1 class I, CE3                                                                                                               | RT1-CE3 414793                                  | 2,11 | up   |
| 6164285 | 7220557 | 1424309 | RT1 class I, CE3                                                                                                               | RT1-CE3 414793                                  | 1,28 | down |
| 6486976 | 7220557 | 1424310 | RT1 class I, CE3                                                                                                               | RT1-CE3 414793                                  | 1,06 | down |
| 5717103 | 7220541 | 1424285 | RT1 class I, CE4                                                                                                               | RT1-CE4 414783                                  | 2,10 | down |
| 5781096 | 7220541 | 1424283 | RT1 class I, CE4                                                                                                               | RT1-CE4 414783                                  | 1,02 | up   |
| 5824526 | 7220541 | 1424282 | RT1 class I, CE4                                                                                                               | RT1-CE4 414783                                  | 2,69 | down |
| 6124998 | 7220541 | 1424284 | RT1 class I, CE4                                                                                                               | RT1-CE4 414783                                  | 2,14 | up   |
| 6476362 | 7220541 | 1424281 | RT1 class I, CE4                                                                                                               | RT1-CE4 414783                                  | 1,37 | down |
| 6594645 | 7220541 | 1424286 | RT1 class I, CE4                                                                                                               | RT1-CE4 414783                                  | 3,48 | down |
| 5681011 | 7220541 | 1424274 | RT1 class I, CE5                                                                                                               | RT1-CE5 309607                                  | 1,09 | down |
| 5817745 | 7220541 | 1424278 | RT1 class I, CE5                                                                                                               | RT1-CE5 309607                                  | 1,88 | up   |
| 6167766 | 7220541 | 1424278 | RT1 class I, CE5                                                                                                               | RT1-CE5 309607                                  | 1,82 | up   |
| 6169067 | 7220541 | 1424279 | RT1 class I, CE5                                                                                                               | RT1-CE5 309607                                  | 1,06 | up   |
| 6343495 | 7220541 | 1424276 | RT1 class I, CE5                                                                                                               | RT1-CE5 309607                                  | 1,05 | up   |
| 6379175 | 7220541 | 1424275 | RT1 class I, CE5                                                                                                               | RT1-CE5 309607                                  | 1,53 | up   |
| 6495343 | 7220541 | 1424277 | RT1 class I, CE5                                                                                                               | RT1-CE5 309607                                  | 1,67 | up   |
| 6639078 | 7220541 | 1424275 | RT1 class I, CE5                                                                                                               | RT1-CE5 309607                                  | 1,39 | up   |
| 6026371 | 7220541 | 1424272 | RT1 class I, CE5 /// MHC class I RT1.Aa alpha-chain                                                                            | RT1-CE5 /// Rt1.aa309607 /// 10018893!          | 1,31 | down |
| 5980405 | 7216676 | 1414427 | RT1 class I, CE7                                                                                                               | RT1-CE7 368153                                  | 1,12 | down |
| 6179965 | 7216676 | 1414425 | RT1 class I, CE7                                                                                                               | RT1-CE7 368153                                  | 2,27 | up   |
| 6222885 | 7216676 | 1414424 | RT1 class I, CE7                                                                                                               | RT1-CE7 368153                                  | 1,02 | down |
| 6680965 | 7216676 | 1414426 | RT1 class I, CE7                                                                                                               | RT1-CE7 368153                                  | 1,01 | up   |
| 6130573 | 7216994 | 1415197 | RT1 class Ia, locus A1                                                                                                         | RT1-A1 24973                                    | 3,30 | down |
| 6700370 | 7216994 | 1415198 | RT1 class Ia, locus A1                                                                                                         | RT1-A1 24973                                    | 1,03 | up   |
| 6651777 | 7216994 | 1415181 | RT1 class Ia, locus A1 /// RT1 class I, A3                                                                                     | RT1-A1 /// RT1-A3 24973 /// 309627              | 2,14 | up   |
| 5680755 | 7216994 | 1415190 | RT1 class Ia, locus A2                                                                                                         | RT1-A2 24974                                    | 1,15 | down |
| 5877298 | 7216994 | 1415188 | RT1 class Ia, locus A2                                                                                                         | RT1-A2 24974                                    | 3,61 | down |
| 6373267 | 7216994 | 1415189 | RT1 class Ia, locus A2                                                                                                         | RT1-A2 24974                                    | 1,26 | down |
| 6430464 | 7216994 | 1415191 | RT1 class Ia, locus A2                                                                                                         | RT1-A2 24974                                    | 1,12 | down |
| 6671509 | 7216994 | 1415192 | RT1 class Ia, locus A2 /// MHC class I RT1.Aa alpha-chain /// RT1 class I, A3 /// la /// RT1-A3 /// RT138935 /// 309627 /// 2  | RT1-A2 /// RT1-A3 24974 /// 309627              | 1,27 | up   |
| 5715677 | 7216994 | 1415196 | RT1 class Ia, locus A2 /// RT1 class I, A3                                                                                     | RT1-A2 /// RT1-A3 24974 /// 309627              | 3,34 | down |
| 6255552 | 7216994 | 1415194 | RT1 class Ia, locus A2 /// RT1 class I, A3                                                                                     | RT1-A2 /// RT1-A3 24974 /// 309627              | 1,83 | up   |
| 6659124 | 7216994 | 1415193 | RT1 class Ia, locus A2 /// RT1 class I, A3                                                                                     | RT1-A2 /// RT1-A3 24974 /// 309627              | 1,02 | up   |
| 5749495 | 7216994 | 1415195 | RT1 class Ia, locus A2 /// RT1 class I, A3 /// RT1 class Ib, locus Aw2 /// RT1 class I, A3 /// RT1-Aw2 /// 309627 /// 24737 // | RT1-A2 /// RT1-A3 24974 /// 309627 /// 24737 // | 1,11 | up   |
| 5875968 | 7216994 | 1415196 | RT1 class Ia, locus A2 /// RT1 class I, A3 /// RT1 class Ib, locus Aw2 /// RT1 class I, A3 /// RT1-Aw2 /// 309627 /// 24737 // | RT1-A2 /// RT1-A3 24974 /// 309627 /// 24737 // | 1,24 | up   |
| 5710457 | 7216519 | 1414134 | RT1 class Ib gene, H2-TL-like, grc region (N3)                                                                                 | RT1-N3 24750                                    | 1,22 | down |
| 5985060 | 7216519 | 1414138 | RT1 class Ib gene, H2-TL-like, grc region (N3)                                                                                 | RT1-N3 24750                                    | 1,23 | down |
| 6095429 | 7216519 | 1414141 | RT1 class Ib gene, H2-TL-like, grc region (N3)                                                                                 | RT1-N3 24750                                    | 1,20 | down |
| 6333672 | 7216519 | 1414140 | RT1 class Ib gene, H2-TL-like, grc region (N3)                                                                                 | RT1-N3 24750                                    | 1,15 | up   |
| 6357891 | 7216519 | 1414141 | RT1 class Ib gene, H2-TL-like, grc region (N3)                                                                                 | RT1-N3 24750                                    | 1,91 | down |

|         |         |         |                                                                                                                              |                                           |                  |      |      |
|---------|---------|---------|------------------------------------------------------------------------------------------------------------------------------|-------------------------------------------|------------------|------|------|
| 6468280 | 7216519 | 1414135 | RT1 class Ib gene, H2-TL-like, grc region (N3)                                                                               | RT1-N3                                    | 24750            | 1,15 | down |
| 6494761 | 7216519 | 1414134 | RT1 class Ib gene, H2-TL-like, grc region (N3)                                                                               | RT1-N3                                    | 24750            | 1,02 | up   |
| 5942958 | 7216519 | 1414139 | RT1 class Ib gene, H2-TL-like, grc region (N3) /// RT1 class Ib gene, H2-TL-like, RT1-N3 /// RT1-N1                          | 24750 /// 24748                           | 1,44             | down |      |
| 5710613 | 7216519 | 1414136 | RT1 class Ib gene, H2-TL-like, grc region (N3) /// RT1 class Ib gene, H2-TL-like, N3 /// RT1-N2 /// R1750 /// 360323 /// 247 |                                           | 1,27             | up   |      |
| 6000403 | 7216505 | 1414108 | RT1 class Ib gene, H2-TL-like, grc region (N3) /// RT1 class Ib gene, H2-TL-like, N3 /// RT1-N2 /// R1750 /// 360323 /// 247 |                                           | 1,73             | up   |      |
| 6204723 | 7216505 | 1414109 | RT1 class Ib gene, H2-TL-like, grc region (N3) /// RT1 class Ib gene, H2-TL-like, N3 /// RT1-N2 /// R1750 /// 360323 /// 247 |                                           | 1,23             | down |      |
| 6231624 | 7216505 | 1414107 | RT1 class Ib gene, H2-TL-like, grc region (N3) /// RT1 class Ib gene, H2-TL-like, N3 /// RT1-N2 /// R1750 /// 360323 /// 247 |                                           | 2,10             | up   |      |
| 6325929 | 7216519 | 1414136 | RT1 class Ib gene, H2-TL-like, grc region (N3) /// RT1 class Ib gene, H2-TL-like, N3 /// RT1-N2 /// R1750 /// 360323 /// 247 |                                           | 2,73             | up   |      |
| 6339954 | 7216519 | 1414137 | RT1 class Ib gene, H2-TL-like, grc region (N3) /// RT1 class Ib gene, H2-TL-like, N3 /// RT1-N2 /// R1750 /// 360323 /// 247 |                                           | 2,11             | up   |      |
| 6164956 | 7216505 | 1414110 | RT1 class Ib gene, H2-TL-like, grc region(N2)                                                                                | RT1-N2                                    | 360323           | 1,12 | down |
| 5826119 | 7216505 | 1414106 | RT1 class Ib gene, H2-TL-like, grc region(N2) /// RT1 class Ib gene, H2-TL-like, {RT1-N2 /// RT1-N1                          | 360323 /// 24748                          | 1,65             | down |      |
| 5841468 | 7216505 | 1414111 | RT1 class Ib gene, H2-TL-like, grc region(N2) /// RT1 class Ib gene, H2-TL-like, {RT1-N2 /// RT1-N1                          | 360323 /// 24748                          | 1,01             | down |      |
| 6193811 | 7216505 | 1414105 | RT1 class Ib gene, H2-TL-like, grc region(N2) /// RT1 class Ib gene, H2-TL-like, {RT1-N2 /// RT1-N1                          | 360323 /// 24748                          | 1,04             | up   |      |
| 6375369 | 7216505 | 1414106 | RT1 class Ib gene, H2-TL-like, grc region(N2) /// RT1 class Ib gene, H2-TL-like, {RT1-N2 /// RT1-N1                          | 360323 /// 24748                          | 1,99             | up   |      |
| 6523100 | 7216505 | 1414112 | RT1 class Ib gene, H2-TL-like, grc region(N2) /// RT1 class Ib gene, H2-TL-like, {RT1-N2 /// RT1-N1                          | 360323 /// 24748                          | 1,61             | down |      |
| 6396165 | 7220557 | 1424308 | RT1 class Ib, locus Aw2 /// RT1 class I, A3 /// RT1 class I, CE3                                                             | w2 /// RT1-A3 /// R137 /// 309627 /// 414 | 1,67             | up   |      |
| 6077325 | 7224452 | 1433367 | RT1 class Ib, locus Aw2 /// RT1 class I, CE11                                                                                | T1-Aw2 /// RT1-CE                         | 24737 /// 414791 | 1,17 | up   |
| 6663729 | 7220541 | 1424273 | RT1 class Ib, locus Aw2 /// RT1 class I, CE5                                                                                 | T1-Aw2 /// RT1-CE                         | 24737 /// 309607 | 1,02 | up   |
| 6434473 | 7216994 | 1415202 | RT1 class Ib, locus Aw2 /// RT1 class Ia, locus A1                                                                           | RT1-Aw2 /// RT1-A                         | 24737 /// 24973  | 1,44 | up   |
| 6724248 | 7216994 | 1415201 | RT1 class Ib, locus Aw2 /// RT1 class Ia, locus A1                                                                           | RT1-Aw2 /// RT1-A                         | 24737 /// 24973  | 1,67 | up   |
| 5715450 | 7216511 | 1414126 | RT1 class Ib, locus H2-Q-like, grc region                                                                                    | RT1-O                                     | 24751            | 1,47 | down |
| 5757405 | 7216511 | 1414125 | RT1 class Ib, locus H2-Q-like, grc region                                                                                    | RT1-O                                     | 24751            | 1,06 | down |
| 6203620 | 7216511 | 1414124 | RT1 class Ib, locus H2-Q-like, grc region                                                                                    | RT1-O                                     | 24751            | 2,71 | up   |
| 6205605 | 7216511 | 1414123 | RT1 class Ib, locus H2-Q-like, grc region                                                                                    | RT1-O                                     | 24751            | 1,31 | up   |
| 6533213 | 7216511 | 1414122 | RT1 class Ib, locus H2-Q-like, grc region                                                                                    | RT1-O                                     | 24751            | 1,45 | down |
| 5852615 | 7216926 | 1415046 | RT1 class II, locus Ba                                                                                                       | RT1-Ba                                    | 309621           | 1,00 | down |
| 6204318 | 7216926 | 1415045 | RT1 class II, locus Ba                                                                                                       | RT1-Ba                                    | 309621           | 2,33 | up   |
| 6277957 | 7216926 | 1415044 | RT1 class II, locus Ba                                                                                                       | RT1-Ba                                    | 309621           | 1,44 | down |
| 6362395 | 7216926 | 1415046 | RT1 class II, locus Ba                                                                                                       | RT1-Ba                                    | 309621           | 1,83 | up   |
| 6406548 | 7216926 | 1415048 | RT1 class II, locus Ba                                                                                                       | RT1-Ba                                    | 309621           | 1,86 | down |
| 6430634 | 7216926 | 1415047 | RT1 class II, locus Ba                                                                                                       | RT1-Ba                                    | 309621           | 1,45 | down |
| 6352043 | 7220882 | 1424994 | RT1 class II, locus Bb                                                                                                       | RT1-Bb                                    | 309622           | 5,16 | down |
| 6602804 | 7220882 | 1424995 | RT1 class II, locus Bb                                                                                                       | RT1-Bb                                    | 309622           | 1,60 | down |
| 6636314 | 7220882 | 1424994 | RT1 class II, locus Bb                                                                                                       | RT1-Bb                                    | 309622           | 1,20 | down |
| 6678801 | 7220882 | 1424993 | RT1 class II, locus Bb                                                                                                       | RT1-Bb                                    | 309622           | 1,00 | up   |
| 6703260 | 7220882 | 1424990 | RT1 class II, locus Bb                                                                                                       | RT1-Bb                                    | 309622           | 2,66 | up   |
| 5713043 | 7220868 | 1424972 | RT1 class II, locus Db1                                                                                                      | RT1-Db1                                   | 294270           | 1,73 | up   |
| 5771937 | 7220868 | 1424974 | RT1 class II, locus Db1                                                                                                      | RT1-Db1                                   | 294270           | 1,18 | down |
| 5818377 | 7220868 | 1424973 | RT1 class II, locus Db1                                                                                                      | RT1-Db1                                   | 294270           | 1,78 | up   |
| 5990980 | 7220868 | 1424971 | RT1 class II, locus Db1                                                                                                      | RT1-Db1                                   | 294270           | 2,38 | up   |
| 6011044 | 7220868 | 1424971 | RT1 class II, locus Db1                                                                                                      | RT1-Db1                                   | 294270           | 1,36 | down |
| 6232438 | 7220868 | 1424975 | RT1 class II, locus Db1                                                                                                      | RT1-Db1                                   | 294270           | 1,19 | down |
| 6631518 | 7220868 | 1424974 | RT1 class II, locus Db1                                                                                                      | RT1-Db1                                   | 294270           | 1,20 | down |
| 6691003 | 7220868 | 1424974 | RT1 class II, locus Db1                                                                                                      | RT1-Db1                                   | 294270           | 1,08 | up   |
| 6723150 | 7220868 | 1424974 | RT1 class II, locus Db1                                                                                                      | RT1-Db1                                   | 294270           | 1,14 | down |
| 5673220 | 7124152 | 1187346 | RUN and FYVE domain containing 3                                                                                             | Rufy3                                     | 360921           | 1,07 | up   |
| 5820017 | 7124152 | 1187349 | RUN and FYVE domain containing 3                                                                                             | Rufy3                                     | 360921           | 1,01 | down |
| 5825966 | 7124152 | 1187347 | RUN and FYVE domain containing 3                                                                                             | Rufy3                                     | 360921           | 1,11 | down |
| 6007576 | 7124152 | 1187338 | RUN and FYVE domain containing 3                                                                                             | Rufy3                                     | 360921           | 1,14 | up   |
| 6088776 | 7124152 | 1187339 | RUN and FYVE domain containing 3                                                                                             | Rufy3                                     | 360921           | 1,07 | up   |
| 6115691 | 7124152 | 1187344 | RUN and FYVE domain containing 3                                                                                             | Rufy3                                     | 360921           | 1,00 | down |
| 6154153 | 7124152 | 1187341 | RUN and FYVE domain containing 3                                                                                             | Rufy3                                     | 360921           | 1,00 | down |
| 6179248 | 7124152 | 1187349 | RUN and FYVE domain containing 3                                                                                             | Rufy3                                     | 360921           | 1,05 | down |
| 6183218 | 7124152 | 1187337 | RUN and FYVE domain containing 3                                                                                             | Rufy3                                     | 360921           | 1,66 | down |
| 6218459 | 7124152 | 1187340 | RUN and FYVE domain containing 3                                                                                             | Rufy3                                     | 360921           | 2,77 | up   |
| 6321490 | 7124152 | 1187350 | RUN and FYVE domain containing 3                                                                                             | Rufy3                                     | 360921           | 1,02 | down |

|         |         |         |                                       |        |        |      |      |
|---------|---------|---------|---------------------------------------|--------|--------|------|------|
| 6521713 | 7124152 | 1187345 | RUN and FYVE domain containing 3      | Rufy3  | 360921 | 1,17 | up   |
| 6548103 | 7124152 | 1187343 | RUN and FYVE domain containing 3      | Rufy3  | 360921 | 1,21 | up   |
| 6569550 | 7124152 | 1187348 | RUN and FYVE domain containing 3      | Rufy3  | 360921 | 1,08 | up   |
| 6612413 | 7124152 | 1187342 | RUN and FYVE domain containing 3      | Rufy3  | 360921 | 1,10 | down |
| 5627566 | 7091840 | 1107441 | runt related transcription factor 1   | Runx1  | 50662  | 1,43 | down |
| 5693104 | 7091840 | 1107445 | runt related transcription factor 1   | Runx1  | 50662  | 1,85 | up   |
| 5769943 | 7091840 | 1107439 | runt related transcription factor 1   | Runx1  | 50662  | 1,49 | down |
| 5775231 | 7091840 | 1107440 | runt related transcription factor 1   | Runx1  | 50662  | 1,18 | down |
| 5787151 | 7091840 | 1107443 | runt related transcription factor 1   | Runx1  | 50662  | 2,04 | up   |
| 6078366 | 7091840 | 1107444 | runt related transcription factor 1   | Runx1  | 50662  | 1,21 | down |
| 6682291 | 7091840 | 1107442 | runt related transcription factor 1   | Runx1  | 50662  | 1,32 | up   |
| 5625704 | 7051009 | 1011786 | RuvB-like 2 (E. coli)                 | Ruvbl2 | 292907 | 1,15 | down |
| 5765167 | 7051009 | 1011782 | RuvB-like 2 (E. coli)                 | Ruvbl2 | 292907 | 2,34 | up   |
| 5791970 | 7051009 | 1011788 | RuvB-like 2 (E. coli)                 | Ruvbl2 | 292907 | 1,46 | down |
| 5922234 | 7051009 | 1011780 | RuvB-like 2 (E. coli)                 | Ruvbl2 | 292907 | 1,07 | up   |
| 5979837 | 7051009 | 1011778 | RuvB-like 2 (E. coli)                 | Ruvbl2 | 292907 | 1,23 | up   |
| 6114965 | 7051009 | 1011776 | RuvB-like 2 (E. coli)                 | Ruvbl2 | 292907 | 1,00 | up   |
| 6223971 | 7051009 | 1011775 | RuvB-like 2 (E. coli)                 | Ruvbl2 | 292907 | 1,16 | up   |
| 6296000 | 7051009 | 1011785 | RuvB-like 2 (E. coli)                 | Ruvbl2 | 292907 | 1,17 | up   |
| 6310353 | 7051009 | 1011776 | RuvB-like 2 (E. coli)                 | Ruvbl2 | 292907 | 1,32 | up   |
| 6505705 | 7051009 | 1011784 | RuvB-like 2 (E. coli)                 | Ruvbl2 | 292907 | 1,33 | up   |
| 6531249 | 7051009 | 1011776 | RuvB-like 2 (E. coli)                 | Ruvbl2 | 292907 | 1,01 | up   |
| 6546944 | 7051009 | 1011786 | RuvB-like 2 (E. coli)                 | Ruvbl2 | 292907 | 1,33 | down |
| 6577817 | 7051009 | 1011781 | RuvB-like 2 (E. coli)                 | Ruvbl2 | 292907 | 1,11 | down |
| 6616270 | 7051009 | 1011779 | RuvB-like 2 (E. coli)                 | Ruvbl2 | 292907 | 1,31 | up   |
| 5692061 | 7049399 | 1008410 | ryanodine receptor 1, skeletal muscle | Ryr1   | 114207 | 1,10 | down |
| 5709510 | 7049399 | 1008321 | ryanodine receptor 1, skeletal muscle | Ryr1   | 114207 | 1,45 | down |
| 5807330 | 7049399 | 1008326 | ryanodine receptor 1, skeletal muscle | Ryr1   | 114207 | 2,06 | up   |
| 6353375 | 7049399 | 1008322 | ryanodine receptor 1, skeletal muscle | Ryr1   | 114207 | 1,07 | up   |
| 6408078 | 7049399 | 1008411 | ryanodine receptor 1, skeletal muscle | Ryr1   | 114207 | 1,13 | up   |
| 6445075 | 7049399 | 1008412 | ryanodine receptor 1, skeletal muscle | Ryr1   | 114207 | 1,02 | up   |
| 6484282 | 7049399 | 1008411 | ryanodine receptor 1, skeletal muscle | Ryr1   | 114207 | 2,21 | down |
| 6538511 | 7049399 | 1008323 | ryanodine receptor 1, skeletal muscle | Ryr1   | 114207 | 1,26 | down |
| 6610619 | 7049399 | 1008324 | ryanodine receptor 1, skeletal muscle | Ryr1   | 114207 | 1,41 | up   |
| 6634854 | 7049399 | 1008327 | ryanodine receptor 1, skeletal muscle | Ryr1   | 114207 | 1,22 | up   |
| 6699109 | 7049399 | 1008410 | ryanodine receptor 1, skeletal muscle | Ryr1   | 114207 | 1,19 | down |
| 6725526 | 7049399 | 1008409 | ryanodine receptor 1, skeletal muscle | Ryr1   | 114207 | 1,08 | up   |
| 6728948 | 7049399 | 1008325 | ryanodine receptor 1, skeletal muscle | Ryr1   | 114207 | 1,32 | down |
| 5626854 | 7159036 | 1272844 | ryanodine receptor 2, cardiac         | Ryr2   | 689560 | 1,03 | up   |
| 5632943 | 7159036 | 1272928 | ryanodine receptor 2, cardiac         | Ryr2   | 689560 | 1,09 | up   |
| 5655286 | 7159036 | 1272881 | ryanodine receptor 2, cardiac         | Ryr2   | 689560 | 1,15 | up   |
| 5663251 | 7159036 | 1272934 | ryanodine receptor 2, cardiac         | Ryr2   | 689560 | 1,01 | down |
| 5663894 | 7159036 | 1272952 | ryanodine receptor 2, cardiac         | Ryr2   | 689560 | 1,02 | down |
| 5666084 | 7159036 | 1272968 | ryanodine receptor 2, cardiac         | Ryr2   | 689560 | 1,26 | down |
| 5680237 | 7159036 | 1272899 | ryanodine receptor 2, cardiac         | Ryr2   | 689560 | 1,37 | down |
| 5687873 | 7159036 | 1272898 | ryanodine receptor 2, cardiac         | Ryr2   | 689560 | 1,13 | up   |
| 5717967 | 7159036 | 1272914 | ryanodine receptor 2, cardiac         | Ryr2   | 689560 | 1,19 | down |
| 5719745 | 7159036 | 1272890 | ryanodine receptor 2, cardiac         | Ryr2   | 689560 | 1,04 | up   |
| 5748587 | 7159036 | 1272923 | ryanodine receptor 2, cardiac         | Ryr2   | 689560 | 1,00 | down |
| 5760312 | 7159036 | 1272857 | ryanodine receptor 2, cardiac         | Ryr2   | 689560 | 1,21 | up   |
| 5762180 | 7159036 | 1272879 | ryanodine receptor 2, cardiac         | Ryr2   | 689560 | 1,01 | up   |
| 5787593 | 7159036 | 1272883 | ryanodine receptor 2, cardiac         | Ryr2   | 689560 | 1,17 | down |
| 5792795 | 7159036 | 1272876 | ryanodine receptor 2, cardiac         | Ryr2   | 689560 | 1,63 | up   |
| 5793875 | 7159036 | 1272933 | ryanodine receptor 2, cardiac         | Ryr2   | 689560 | 1,17 | down |
| 5809861 | 7159036 | 1272926 | ryanodine receptor 2, cardiac         | Ryr2   | 689560 | 1,09 | up   |
| 5817121 | 7159036 | 1272925 | ryanodine receptor 2, cardiac         | Ryr2   | 689560 | 1,39 | down |

|         |         |         |                               |      |        |      |      |
|---------|---------|---------|-------------------------------|------|--------|------|------|
| 5834338 | 7159036 | 1272851 | ryanodine receptor 2, cardiac | Ryr2 | 689560 | 1,09 | down |
| 5856494 | 7159036 | 1272964 | ryanodine receptor 2, cardiac | Ryr2 | 689560 | 1,08 | down |
| 5862096 | 7159036 | 1272889 | ryanodine receptor 2, cardiac | Ryr2 | 689560 | 1,18 | up   |
| 5870401 | 7159036 | 1272869 | ryanodine receptor 2, cardiac | Ryr2 | 689560 | 1,05 | down |
| 5895094 | 7159036 | 1272863 | ryanodine receptor 2, cardiac | Ryr2 | 689560 | 1,18 | down |
| 5897452 | 7159036 | 1272873 | ryanodine receptor 2, cardiac | Ryr2 | 689560 | 1,66 | down |
| 5918277 | 7159036 | 1272918 | ryanodine receptor 2, cardiac | Ryr2 | 689560 | 1,24 | up   |
| 5922565 | 7159036 | 1272877 | ryanodine receptor 2, cardiac | Ryr2 | 689560 | 1,06 | down |
| 5930001 | 7159036 | 1272954 | ryanodine receptor 2, cardiac | Ryr2 | 689560 | 1,55 | down |
| 5933313 | 7159036 | 1272960 | ryanodine receptor 2, cardiac | Ryr2 | 689560 | 1,16 | down |
| 5962929 | 7159036 | 1272951 | ryanodine receptor 2, cardiac | Ryr2 | 689560 | 1,27 | up   |
| 5970935 | 7159036 | 1272884 | ryanodine receptor 2, cardiac | Ryr2 | 689560 | 1,05 | down |
| 5974989 | 7159036 | 1272841 | ryanodine receptor 2, cardiac | Ryr2 | 689560 | 1,70 | up   |
| 5980869 | 7159036 | 1272906 | ryanodine receptor 2, cardiac | Ryr2 | 689560 | 1,24 | down |
| 5998126 | 7159036 | 1272896 | ryanodine receptor 2, cardiac | Ryr2 | 689560 | 1,17 | down |
| 6032480 | 7159036 | 1272864 | ryanodine receptor 2, cardiac | Ryr2 | 689560 | 1,02 | up   |
| 6037821 | 7159036 | 1272848 | ryanodine receptor 2, cardiac | Ryr2 | 689560 | 1,87 | up   |
| 6039882 | 7159036 | 1272915 | ryanodine receptor 2, cardiac | Ryr2 | 689560 | 1,13 | down |
| 6045636 | 7159036 | 1272902 | ryanodine receptor 2, cardiac | Ryr2 | 689560 | 1,17 | up   |
| 6046470 | 7159036 | 1272908 | ryanodine receptor 2, cardiac | Ryr2 | 689560 | 1,13 | down |
| 6075726 | 7159036 | 1272878 | ryanodine receptor 2, cardiac | Ryr2 | 689560 | 1,23 | up   |
| 6088439 | 7159036 | 1272924 | ryanodine receptor 2, cardiac | Ryr2 | 689560 | 1,30 | up   |
| 6100508 | 7159036 | 1272931 | ryanodine receptor 2, cardiac | Ryr2 | 689560 | 1,30 | up   |
| 6115602 | 7159036 | 1272930 | ryanodine receptor 2, cardiac | Ryr2 | 689560 | 1,25 | up   |
| 6125721 | 7159036 | 1272854 | ryanodine receptor 2, cardiac | Ryr2 | 689560 | 2,05 | down |
| 6133232 | 7159036 | 1272859 | ryanodine receptor 2, cardiac | Ryr2 | 689560 | 1,40 | up   |
| 6142949 | 7159036 | 1272879 | ryanodine receptor 2, cardiac | Ryr2 | 689560 | 1,52 | down |
| 6155678 | 7159036 | 1272874 | ryanodine receptor 2, cardiac | Ryr2 | 689560 | 1,82 | up   |
| 6158682 | 7159036 | 1272809 | ryanodine receptor 2, cardiac | Ryr2 | 689560 | 1,23 | down |
| 6158697 | 7159036 | 1272893 | ryanodine receptor 2, cardiac | Ryr2 | 689560 | 1,76 | down |
| 6174369 | 7159036 | 1272887 | ryanodine receptor 2, cardiac | Ryr2 | 689560 | 1,03 | up   |
| 6178329 | 7159036 | 1272938 | ryanodine receptor 2, cardiac | Ryr2 | 689560 | 1,92 | down |
| 6181511 | 7159036 | 1272953 | ryanodine receptor 2, cardiac | Ryr2 | 689560 | 1,07 | down |
| 6190212 | 7159036 | 1272891 | ryanodine receptor 2, cardiac | Ryr2 | 689560 | 1,25 | down |
| 6194065 | 7159036 | 1272913 | ryanodine receptor 2, cardiac | Ryr2 | 689560 | 1,11 | up   |
| 6202779 | 7159036 | 1272901 | ryanodine receptor 2, cardiac | Ryr2 | 689560 | 1,37 | down |
| 6211506 | 7159036 | 1272862 | ryanodine receptor 2, cardiac | Ryr2 | 689560 | 1,04 | up   |
| 6213046 | 7159036 | 1272950 | ryanodine receptor 2, cardiac | Ryr2 | 689560 | 1,16 | up   |
| 6216987 | 7159036 | 1272967 | ryanodine receptor 2, cardiac | Ryr2 | 689560 | 1,00 | down |
| 6228502 | 7159036 | 1272966 | ryanodine receptor 2, cardiac | Ryr2 | 689560 | 1,22 | down |
| 6235702 | 7159036 | 1272900 | ryanodine receptor 2, cardiac | Ryr2 | 689560 | 1,00 | up   |
| 6237289 | 7159036 | 1272874 | ryanodine receptor 2, cardiac | Ryr2 | 689560 | 1,10 | up   |
| 6239513 | 7159036 | 1272944 | ryanodine receptor 2, cardiac | Ryr2 | 689560 | 1,26 | up   |
| 6265808 | 7159036 | 1272945 | ryanodine receptor 2, cardiac | Ryr2 | 689560 | 1,45 | down |
| 6276147 | 7159036 | 1272868 | ryanodine receptor 2, cardiac | Ryr2 | 689560 | 1,01 | up   |
| 6277971 | 7159036 | 1272930 | ryanodine receptor 2, cardiac | Ryr2 | 689560 | 1,41 | up   |
| 6316451 | 7159036 | 1272886 | ryanodine receptor 2, cardiac | Ryr2 | 689560 | 1,16 | up   |
| 6324210 | 7159036 | 1272912 | ryanodine receptor 2, cardiac | Ryr2 | 689560 | 1,21 | up   |
| 6328370 | 7159036 | 1272849 | ryanodine receptor 2, cardiac | Ryr2 | 689560 | 1,25 | up   |
| 6362911 | 7159036 | 1272897 | ryanodine receptor 2, cardiac | Ryr2 | 689560 | 1,25 | down |
| 6363399 | 7159036 | 1272840 | ryanodine receptor 2, cardiac | Ryr2 | 689560 | 1,57 | up   |
| 6365816 | 7159036 | 1272968 | ryanodine receptor 2, cardiac | Ryr2 | 689560 | 1,13 | up   |
| 6374258 | 7159036 | 1272903 | ryanodine receptor 2, cardiac | Ryr2 | 689560 | 1,26 | down |
| 6383100 | 7159036 | 1272846 | ryanodine receptor 2, cardiac | Ryr2 | 689560 | 1,17 | up   |
| 6387416 | 7159036 | 1272829 | ryanodine receptor 2, cardiac | Ryr2 | 689560 | 1,17 | down |
| 6420753 | 7159036 | 1272894 | ryanodine receptor 2, cardiac | Ryr2 | 689560 | 1,33 | up   |

|         |         |         |                                  |         |        |      |      |
|---------|---------|---------|----------------------------------|---------|--------|------|------|
| 6425704 | 7159036 | 1272916 | ryanodine receptor 2, cardiac    | Ryr2    | 689560 | 1,30 | up   |
| 6427436 | 7159036 | 1272871 | ryanodine receptor 2, cardiac    | Ryr2    | 689560 | 1,06 | up   |
| 6436789 | 7159036 | 1272822 | ryanodine receptor 2, cardiac    | Ryr2    | 689560 | 1,63 | up   |
| 6439347 | 7159036 | 1272865 | ryanodine receptor 2, cardiac    | Ryr2    | 689560 | 1,53 | up   |
| 6492325 | 7159036 | 1272831 | ryanodine receptor 2, cardiac    | Ryr2    | 689560 | 1,07 | down |
| 6511780 | 7159036 | 1272832 | ryanodine receptor 2, cardiac    | Ryr2    | 689560 | 1,36 | down |
| 6513513 | 7159036 | 1272942 | ryanodine receptor 2, cardiac    | Ryr2    | 689560 | 1,08 | down |
| 6517425 | 7159036 | 1272850 | ryanodine receptor 2, cardiac    | Ryr2    | 689560 | 1,14 | down |
| 6527299 | 7159036 | 1272888 | ryanodine receptor 2, cardiac    | Ryr2    | 689560 | 1,50 | down |
| 6531330 | 7159036 | 1272895 | ryanodine receptor 2, cardiac    | Ryr2    | 689560 | 1,14 | down |
| 6565605 | 7159036 | 1272949 | ryanodine receptor 2, cardiac    | Ryr2    | 689560 | 1,62 | up   |
| 6570560 | 7159036 | 1272905 | ryanodine receptor 2, cardiac    | Ryr2    | 689560 | 1,01 | down |
| 6571054 | 7159036 | 1272880 | ryanodine receptor 2, cardiac    | Ryr2    | 689560 | 1,10 | down |
| 6574857 | 7159036 | 1272959 | ryanodine receptor 2, cardiac    | Ryr2    | 689560 | 1,17 | up   |
| 6574916 | 7159036 | 1272892 | ryanodine receptor 2, cardiac    | Ryr2    | 689560 | 1,60 | down |
| 6577990 | 7159036 | 1272885 | ryanodine receptor 2, cardiac    | Ryr2    | 689560 | 1,20 | down |
| 6587082 | 7159036 | 1272919 | ryanodine receptor 2, cardiac    | Ryr2    | 689560 | 1,17 | down |
| 6594534 | 7159036 | 1272856 | ryanodine receptor 2, cardiac    | Ryr2    | 689560 | 1,09 | down |
| 6612419 | 7159036 | 1272917 | ryanodine receptor 2, cardiac    | Ryr2    | 689560 | 1,34 | up   |
| 6645022 | 7159036 | 1272920 | ryanodine receptor 2, cardiac    | Ryr2    | 689560 | 2,20 | up   |
| 6648432 | 7159036 | 1272875 | ryanodine receptor 2, cardiac    | Ryr2    | 689560 | 1,01 | up   |
| 6654096 | 7159036 | 1272911 | ryanodine receptor 2, cardiac    | Ryr2    | 689560 | 1,41 | up   |
| 6663218 | 7159036 | 1272910 | ryanodine receptor 2, cardiac    | Ryr2    | 689560 | 1,07 | down |
| 6664195 | 7159036 | 1272882 | ryanodine receptor 2, cardiac    | Ryr2    | 689560 | 1,18 | down |
| 6666938 | 7159036 | 1272939 | ryanodine receptor 2, cardiac    | Ryr2    | 689560 | 1,12 | down |
| 6667470 | 7159036 | 1272946 | ryanodine receptor 2, cardiac    | Ryr2    | 689560 | 1,00 | up   |
| 6675983 | 7159036 | 1272861 | ryanodine receptor 2, cardiac    | Ryr2    | 689560 | 1,09 | up   |
| 6678589 | 7159036 | 1272834 | ryanodine receptor 2, cardiac    | Ryr2    | 689560 | 1,25 | up   |
| 6679144 | 7159036 | 1272868 | ryanodine receptor 2, cardiac    | Ryr2    | 689560 | 3,44 | up   |
| 6679202 | 7159036 | 1272959 | ryanodine receptor 2, cardiac    | Ryr2    | 689560 | 1,29 | up   |
| 6704188 | 7159036 | 1272870 | ryanodine receptor 2, cardiac    | Ryr2    | 689560 | 1,33 | down |
| 6708151 | 7159036 | 1272940 | ryanodine receptor 2, cardiac    | Ryr2    | 689560 | 1,12 | up   |
| 6745157 | 7159036 | 1272845 | ryanodine receptor 2, cardiac    | Ryr2    | 689560 | 1,37 | up   |
| 5740755 | 7243130 | 1480819 | ryanodine receptor 3             | Ryr3    | 170546 | 1,04 | up   |
| 5806572 | 7243130 | 1480962 | ryanodine receptor 3             | Ryr3    | 170546 | 1,08 | down |
| 5834972 | 7243130 | 1480899 | ryanodine receptor 3             | Ryr3    | 170546 | 2,49 | down |
| 5943387 | 7243130 | 1480816 | ryanodine receptor 3             | Ryr3    | 170546 | 1,38 | down |
| 5966638 | 7243130 | 1480820 | ryanodine receptor 3             | Ryr3    | 170546 | 1,07 | up   |
| 6104472 | 7243130 | 1480954 | ryanodine receptor 3             | Ryr3    | 170546 | 1,28 | up   |
| 6138437 | 7243130 | 1480821 | ryanodine receptor 3             | Ryr3    | 170546 | 1,09 | up   |
| 6327866 | 7243130 | 1480818 | ryanodine receptor 3             | Ryr3    | 170546 | 2,51 | down |
| 6553151 | 7243130 | 1480811 | ryanodine receptor 3             | Ryr3    | 170546 | 1,07 | down |
| 6640676 | 7243130 | 1480817 | ryanodine receptor 3             | Ryr3    | 170546 | 1,59 | down |
| 5807375 | 7196508 | 1366724 | S100 calcium binding protein A7A | S100a7a | 685479 | 2,40 | up   |
| 5834869 | 7196508 | 1366724 | S100 calcium binding protein A7A | S100a7a | 685479 | 1,00 | up   |
| 5882165 | 7196508 | 1366725 | S100 calcium binding protein A7A | S100a7a | 685479 | 1,02 | up   |
| 6324416 | 7196508 | 1366725 | S100 calcium binding protein A7A | S100a7a | 685479 | 1,24 | down |
| 5697457 | 7137751 | 1220583 | sal-like 2 (Drosophila)          | Sall2   | 305854 | 1,31 | down |
| 5720623 | 7137751 | 1220584 | sal-like 2 (Drosophila)          | Sall2   | 305854 | 1,28 | up   |
| 5934482 | 7137751 | 1220582 | sal-like 2 (Drosophila)          | Sall2   | 305854 | 1,86 | down |
| 6012130 | 7137751 | 1220582 | sal-like 2 (Drosophila)          | Sall2   | 305854 | 1,01 | down |
| 6012332 | 7137751 | 1220584 | sal-like 2 (Drosophila)          | Sall2   | 305854 | 1,35 | down |
| 6238190 | 7137751 | 1220584 | sal-like 2 (Drosophila)          | Sall2   | 305854 | 1,23 | up   |
| 6332916 | 7137751 | 1220584 | sal-like 2 (Drosophila)          | Sall2   | 305854 | 1,06 | up   |
| 6456854 | 7137751 | 1220584 | sal-like 2 (Drosophila)          | Sall2   | 305854 | 1,38 | down |
| 6468287 | 7137751 | 1220589 | sal-like 2 (Drosophila)          | Sall2   | 305854 | 1,74 | up   |

|         |         |         |                                                 |        |        |      |      |
|---------|---------|---------|-------------------------------------------------|--------|--------|------|------|
| 6529539 | 7137751 | 1220581 | sal-like 2 (Drosophila)                         | Sall2  | 305854 | 1,54 | up   |
| 6651075 | 7137751 | 1220580 | sal-like 2 (Drosophila)                         | Sall2  | 305854 | 2,39 | up   |
| 6702694 | 7137751 | 1220584 | sal-like 2 (Drosophila)                         | Sall2  | 305854 | 1,05 | up   |
| 5639767 | 7237124 | 1466069 | sarcosine dehydrogenase                         | Sardh  | 114123 | 1,08 | down |
| 5702684 | 7237124 | 1466068 | sarcosine dehydrogenase                         | Sardh  | 114123 | 1,44 | down |
| 5746153 | 7237124 | 1466071 | sarcosine dehydrogenase                         | Sardh  | 114123 | 1,33 | down |
| 5811062 | 7237124 | 1466079 | sarcosine dehydrogenase                         | Sardh  | 114123 | 1,18 | up   |
| 5841079 | 7237124 | 1466064 | sarcosine dehydrogenase                         | Sardh  | 114123 | 1,27 | up   |
| 5909590 | 7237124 | 1466073 | sarcosine dehydrogenase                         | Sardh  | 114123 | 2,18 | down |
| 5954090 | 7237124 | 1466072 | sarcosine dehydrogenase                         | Sardh  | 114123 | 1,47 | down |
| 5994280 | 7237124 | 1466068 | sarcosine dehydrogenase                         | Sardh  | 114123 | 1,13 | up   |
| 6048107 | 7237124 | 1466063 | sarcosine dehydrogenase                         | Sardh  | 114123 | 1,10 | down |
| 6175885 | 7237124 | 1466062 | sarcosine dehydrogenase                         | Sardh  | 114123 | 2,48 | down |
| 6194492 | 7237124 | 1466075 | sarcosine dehydrogenase                         | Sardh  | 114123 | 1,21 | up   |
| 6233479 | 7237124 | 1466078 | sarcosine dehydrogenase                         | Sardh  | 114123 | 1,06 | down |
| 6250614 | 7237124 | 1466067 | sarcosine dehydrogenase                         | Sardh  | 114123 | 1,28 | up   |
| 6343450 | 7237124 | 1466061 | sarcosine dehydrogenase                         | Sardh  | 114123 | 2,01 | down |
| 6406934 | 7237124 | 1466065 | sarcosine dehydrogenase                         | Sardh  | 114123 | 1,21 | up   |
| 6452129 | 7237124 | 1466078 | sarcosine dehydrogenase                         | Sardh  | 114123 | 1,22 | down |
| 6483519 | 7237124 | 1466070 | sarcosine dehydrogenase                         | Sardh  | 114123 | 1,27 | up   |
| 6546794 | 7237124 | 1466077 | sarcosine dehydrogenase                         | Sardh  | 114123 | 1,37 | up   |
| 6582104 | 7237124 | 1466076 | sarcosine dehydrogenase                         | Sardh  | 114123 | 1,17 | down |
| 6605823 | 7237124 | 1466066 | sarcosine dehydrogenase                         | Sardh  | 114123 | 1,07 | up   |
| 6650130 | 7237124 | 1466074 | sarcosine dehydrogenase                         | Sardh  | 114123 | 1,30 | down |
| 6675322 | 7237124 | 1466080 | sarcosine dehydrogenase                         | Sardh  | 114123 | 1,64 | up   |
| 5851806 | 7132834 | 1208328 | scavenger receptor class A, member 5 (putative) | Scara5 | 305974 | 1,07 | up   |
| 5998800 | 7132834 | 1208331 | scavenger receptor class A, member 5 (putative) | Scara5 | 305974 | 1,05 | up   |
| 6062640 | 7132834 | 1208308 | scavenger receptor class A, member 5 (putative) | Scara5 | 305974 | 1,43 | up   |
| 6117198 | 7132834 | 1208324 | scavenger receptor class A, member 5 (putative) | Scara5 | 305974 | 1,47 | down |
| 6195668 | 7132834 | 1208312 | scavenger receptor class A, member 5 (putative) | Scara5 | 305974 | 2,40 | down |
| 6226534 | 7132834 | 1208331 | scavenger receptor class A, member 5 (putative) | Scara5 | 305974 | 1,08 | up   |
| 6337013 | 7132834 | 1208322 | scavenger receptor class A, member 5 (putative) | Scara5 | 305974 | 2,42 | down |
| 6411847 | 7132834 | 1208321 | scavenger receptor class A, member 5 (putative) | Scara5 | 305974 | 1,16 | up   |
| 6466634 | 7132834 | 1208323 | scavenger receptor class A, member 5 (putative) | Scara5 | 305974 | 1,71 | down |
| 6539308 | 7132834 | 1208305 | scavenger receptor class A, member 5 (putative) | Scara5 | 305974 | 1,11 | down |
| 5728958 | 7069724 | 1055343 | scavenger receptor class F, member 1            | Scarf1 | 303313 | 1,12 | down |
| 5822971 | 7069724 | 1055336 | scavenger receptor class F, member 1            | Scarf1 | 303313 | 1,24 | up   |
| 5861888 | 7069724 | 1055335 | scavenger receptor class F, member 1            | Scarf1 | 303313 | 1,21 | down |
| 5884726 | 7069724 | 1055339 | scavenger receptor class F, member 1            | Scarf1 | 303313 | 1,11 | down |
| 6021537 | 7069724 | 1055340 | scavenger receptor class F, member 1            | Scarf1 | 303313 | 2,25 | up   |
| 6030797 | 7069724 | 1055340 | scavenger receptor class F, member 1            | Scarf1 | 303313 | 1,17 | down |
| 6042050 | 7069724 | 1055336 | scavenger receptor class F, member 1            | Scarf1 | 303313 | 1,23 | up   |
| 6054612 | 7069724 | 1055338 | scavenger receptor class F, member 1            | Scarf1 | 303313 | 1,05 | up   |
| 6129881 | 7069724 | 1055343 | scavenger receptor class F, member 1            | Scarf1 | 303313 | 1,72 | down |
| 6134537 | 7069724 | 1055333 | scavenger receptor class F, member 1            | Scarf1 | 303313 | 1,57 | down |
| 6204220 | 7069724 | 1055333 | scavenger receptor class F, member 1            | Scarf1 | 303313 | 1,09 | down |
| 6270032 | 7069724 | 1055336 | scavenger receptor class F, member 1            | Scarf1 | 303313 | 1,25 | up   |
| 6338512 | 7069724 | 1055338 | scavenger receptor class F, member 1            | Scarf1 | 303313 | 1,16 | down |
| 6356619 | 7069724 | 1055334 | scavenger receptor class F, member 1            | Scarf1 | 303313 | 1,05 | up   |
| 6442689 | 7069724 | 1055340 | scavenger receptor class F, member 1            | Scarf1 | 303313 | 1,06 | down |
| 6542940 | 7069724 | 1055342 | scavenger receptor class F, member 1            | Scarf1 | 303313 | 1,04 | up   |
| 6635766 | 7069724 | 1055336 | scavenger receptor class F, member 1            | Scarf1 | 303313 | 1,01 | up   |
| 6726230 | 7069724 | 1055341 | scavenger receptor class F, member 1            | Scarf1 | 303313 | 1,28 | up   |
| 6735517 | 7069724 | 1055341 | scavenger receptor class F, member 1            | Scarf1 | 303313 | 1,37 | down |
| 5621003 | 7095326 | 1115822 | scavenger receptor class F, member 2            | Scarf2 | 287949 | 1,46 | down |
| 5636417 | 7095326 | 1115816 | scavenger receptor class F, member 2            | Scarf2 | 287949 | 1,04 | down |

|         |         |         |                                                                         |         |        |      |      |
|---------|---------|---------|-------------------------------------------------------------------------|---------|--------|------|------|
| 5679791 | 7095326 | 1115810 | scavenger receptor class F, member 2                                    | Scarf2  | 287949 | 1,00 | up   |
| 5686823 | 7095326 | 1115819 | scavenger receptor class F, member 2                                    | Scarf2  | 287949 | 1,03 | up   |
| 5691666 | 7095326 | 1115810 | scavenger receptor class F, member 2                                    | Scarf2  | 287949 | 1,01 | down |
| 5768242 | 7095326 | 1115813 | scavenger receptor class F, member 2                                    | Scarf2  | 287949 | 1,03 | down |
| 5780481 | 7095326 | 1115811 | scavenger receptor class F, member 2                                    | Scarf2  | 287949 | 1,08 | down |
| 5806447 | 7095326 | 1115811 | scavenger receptor class F, member 2                                    | Scarf2  | 287949 | 1,01 | down |
| 5826016 | 7095326 | 1115810 | scavenger receptor class F, member 2                                    | Scarf2  | 287949 | 1,00 | up   |
| 5857922 | 7095326 | 1115810 | scavenger receptor class F, member 2                                    | Scarf2  | 287949 | 1,00 | up   |
| 5920645 | 7095326 | 1115810 | scavenger receptor class F, member 2                                    | Scarf2  | 287949 | 2,78 | down |
| 6033387 | 7095326 | 1115813 | scavenger receptor class F, member 2                                    | Scarf2  | 287949 | 1,00 | up   |
| 6078479 | 7095326 | 1115814 | scavenger receptor class F, member 2                                    | Scarf2  | 287949 | 1,24 | up   |
| 6092046 | 7095326 | 1115810 | scavenger receptor class F, member 2                                    | Scarf2  | 287949 | 2,08 | down |
| 6223212 | 7095326 | 1115815 | scavenger receptor class F, member 2                                    | Scarf2  | 287949 | 1,00 | down |
| 6371210 | 7095326 | 1115817 | scavenger receptor class F, member 2                                    | Scarf2  | 287949 | 1,00 | up   |
| 6398888 | 7095326 | 1115818 | scavenger receptor class F, member 2                                    | Scarf2  | 287949 | 1,35 | down |
| 6530205 | 7095326 | 1115810 | scavenger receptor class F, member 2                                    | Scarf2  | 287949 | 1,08 | down |
| 6582946 | 7095326 | 1115812 | scavenger receptor class F, member 2                                    | Scarf2  | 287949 | 1,45 | up   |
| 6642358 | 7095326 | 1115817 | scavenger receptor class F, member 2                                    | Scarf2  | 287949 | 1,16 | up   |
| 5623125 | 7097485 | 1120950 | scavenger receptor cysteine rich domain containing, group B (4 domains) | Srcrb4d | 304401 | 1,16 | up   |
| 6388472 | 7097485 | 1120946 | scavenger receptor cysteine rich domain containing, group B (4 domains) | Srcrb4d | 304401 | 1,07 | down |
| 5730561 | 7166497 | 1290367 | Scm-like with four mbt domains 2                                        | Sfmbt2  | 307106 | 1,00 | up   |
| 5946895 | 7166497 | 1290376 | Scm-like with four mbt domains 2                                        | Sfmbt2  | 307106 | 1,97 | up   |
| 6022411 | 7166497 | 1290375 | Scm-like with four mbt domains 2                                        | Sfmbt2  | 307106 | 1,46 | down |
| 6022927 | 7166497 | 1290348 | Scm-like with four mbt domains 2                                        | Sfmbt2  | 307106 | 1,06 | up   |
| 6045531 | 7166497 | 1290350 | Scm-like with four mbt domains 2                                        | Sfmbt2  | 307106 | 1,36 | down |
| 6082610 | 7166497 | 1290371 | Scm-like with four mbt domains 2                                        | Sfmbt2  | 307106 | 2,04 | up   |
| 6109973 | 7166497 | 1290364 | Scm-like with four mbt domains 2                                        | Sfmbt2  | 307106 | 1,03 | up   |
| 6139066 | 7166497 | 1290345 | Scm-like with four mbt domains 2                                        | Sfmbt2  | 307106 | 1,22 | up   |
| 6150770 | 7166497 | 1290378 | Scm-like with four mbt domains 2                                        | Sfmbt2  | 307106 | 1,05 | down |
| 6269320 | 7166497 | 1290377 | Scm-like with four mbt domains 2                                        | Sfmbt2  | 307106 | 1,34 | down |
| 6299207 | 7166497 | 1290363 | Scm-like with four mbt domains 2                                        | Sfmbt2  | 307106 | 1,03 | up   |
| 6479572 | 7166497 | 1290359 | Scm-like with four mbt domains 2                                        | Sfmbt2  | 307106 | 1,28 | down |
| 6532959 | 7166497 | 1290343 | Scm-like with four mbt domains 2                                        | Sfmbt2  | 307106 | 1,31 | down |
| 6549858 | 7166497 | 1290347 | Scm-like with four mbt domains 2                                        | Sfmbt2  | 307106 | 1,03 | down |
| 6571528 | 7166497 | 1290372 | Scm-like with four mbt domains 2                                        | Sfmbt2  | 307106 | 1,08 | down |
| 6610074 | 7166497 | 1290359 | Scm-like with four mbt domains 2                                        | Sfmbt2  | 307106 | 1,05 | down |
| 6643147 | 7166497 | 1290357 | Scm-like with four mbt domains 2                                        | Sfmbt2  | 307106 | 1,02 | down |
| 6693423 | 7166497 | 1290343 | Scm-like with four mbt domains 2                                        | Sfmbt2  | 307106 | 1,13 | up   |
| 6695689 | 7166497 | 1290351 | Scm-like with four mbt domains 2                                        | Sfmbt2  | 307106 | 1,00 | down |
| 6721923 | 7166497 | 1290353 | Scm-like with four mbt domains 2                                        | Sfmbt2  | 307106 | 1,03 | up   |
| 6741918 | 7166497 | 1290361 | Scm-like with four mbt domains 2                                        | Sfmbt2  | 307106 | 1,06 | up   |
| 5620719 | 7253414 | 1506007 | SCO-spondin                                                             | Sspo    | 474348 | 2,40 | down |
| 5626174 | 7253414 | 1506031 | SCO-spondin                                                             | Sspo    | 474348 | 1,04 | up   |
| 5644775 | 7253414 | 1506024 | SCO-spondin                                                             | Sspo    | 474348 | 1,40 | up   |
| 5662034 | 7253414 | 1506003 | SCO-spondin                                                             | Sspo    | 474348 | 1,11 | up   |
| 5679563 | 7253414 | 1506087 | SCO-spondin                                                             | Sspo    | 474348 | 1,03 | down |
| 5718003 | 7253414 | 1506014 | SCO-spondin                                                             | Sspo    | 474348 | 1,01 | up   |
| 5729777 | 7253414 | 1506072 | SCO-spondin                                                             | Sspo    | 474348 | 1,11 | up   |
| 5745631 | 7253414 | 1506001 | SCO-spondin                                                             | Sspo    | 474348 | 1,44 | down |
| 5746407 | 7253414 | 1506060 | SCO-spondin                                                             | Sspo    | 474348 | 1,39 | down |
| 5751246 | 7253414 | 1506020 | SCO-spondin                                                             | Sspo    | 474348 | 1,37 | up   |
| 5757459 | 7253414 | 1505998 | SCO-spondin                                                             | Sspo    | 474348 | 1,64 | down |
| 5769129 | 7253414 | 1506002 | SCO-spondin                                                             | Sspo    | 474348 | 2,09 | up   |
| 5774102 | 7253414 | 1506042 | SCO-spondin                                                             | Sspo    | 474348 | 1,41 | up   |
| 5775665 | 7253414 | 1506068 | SCO-spondin                                                             | Sspo    | 474348 | 1,08 | down |
| 5784441 | 7253414 | 1506088 | SCO-spondin                                                             | Sspo    | 474348 | 1,44 | down |

|         |         |         |             |      |        |      |      |
|---------|---------|---------|-------------|------|--------|------|------|
| 5786545 | 7253414 | 1506065 | SCO-spondin | Sspo | 474348 | 1,01 | up   |
| 5794998 | 7253414 | 1506059 | SCO-spondin | Sspo | 474348 | 1,15 | up   |
| 5798856 | 7253414 | 1506079 | SCO-spondin | Sspo | 474348 | 1,23 | down |
| 5801121 | 7253414 | 1505997 | SCO-spondin | Sspo | 474348 | 1,01 | up   |
| 5804169 | 7253414 | 1505993 | SCO-spondin | Sspo | 474348 | 1,12 | down |
| 5805419 | 7253414 | 1506069 | SCO-spondin | Sspo | 474348 | 1,34 | down |
| 5806457 | 7253414 | 1506035 | SCO-spondin | Sspo | 474348 | 1,02 | down |
| 5814726 | 7253414 | 1506074 | SCO-spondin | Sspo | 474348 | 1,03 | down |
| 5828423 | 7253414 | 1506010 | SCO-spondin | Sspo | 474348 | 1,29 | up   |
| 5834010 | 7253414 | 1505990 | SCO-spondin | Sspo | 474348 | 1,28 | up   |
| 5844352 | 7253414 | 1506048 | SCO-spondin | Sspo | 474348 | 2,01 | up   |
| 5857274 | 7253414 | 1506019 | SCO-spondin | Sspo | 474348 | 1,68 | up   |
| 5865317 | 7253414 | 1506081 | SCO-spondin | Sspo | 474348 | 1,57 | down |
| 5867876 | 7253414 | 1506073 | SCO-spondin | Sspo | 474348 | 1,47 | down |
| 5868754 | 7253414 | 1506062 | SCO-spondin | Sspo | 474348 | 1,17 | down |
| 5878392 | 7253414 | 1506039 | SCO-spondin | Sspo | 474348 | 1,09 | up   |
| 5883162 | 7253414 | 1505991 | SCO-spondin | Sspo | 474348 | 1,03 | down |
| 5886629 | 7253414 | 1506053 | SCO-spondin | Sspo | 474348 | 1,05 | up   |
| 5886646 | 7253414 | 1506029 | SCO-spondin | Sspo | 474348 | 1,06 | down |
| 5891656 | 7253414 | 1506078 | SCO-spondin | Sspo | 474348 | 1,14 | down |
| 5896876 | 7253414 | 1506000 | SCO-spondin | Sspo | 474348 | 1,19 | down |
| 5910386 | 7253414 | 1505986 | SCO-spondin | Sspo | 474348 | 1,23 | down |
| 5916620 | 7253414 | 1506055 | SCO-spondin | Sspo | 474348 | 1,05 | up   |
| 5943934 | 7253414 | 1506061 | SCO-spondin | Sspo | 474348 | 1,45 | up   |
| 5946233 | 7253414 | 1505996 | SCO-spondin | Sspo | 474348 | 1,42 | down |
| 5971261 | 7253414 | 1506016 | SCO-spondin | Sspo | 474348 | 1,10 | down |
| 5998348 | 7253414 | 1505989 | SCO-spondin | Sspo | 474348 | 1,28 | up   |
| 6018216 | 7253414 | 1506032 | SCO-spondin | Sspo | 474348 | 2,03 | down |
| 6042580 | 7253414 | 1506050 | SCO-spondin | Sspo | 474348 | 1,19 | up   |
| 6055202 | 7253414 | 1506056 | SCO-spondin | Sspo | 474348 | 1,07 | up   |
| 6061920 | 7253414 | 1506082 | SCO-spondin | Sspo | 474348 | 1,85 | down |
| 6065637 | 7253414 | 1506051 | SCO-spondin | Sspo | 474348 | 1,02 | up   |
| 6067840 | 7253414 | 1506039 | SCO-spondin | Sspo | 474348 | 1,11 | up   |
| 6085056 | 7253414 | 1506029 | SCO-spondin | Sspo | 474348 | 1,05 | up   |
| 6094488 | 7253414 | 1506064 | SCO-spondin | Sspo | 474348 | 1,05 | down |
| 6106407 | 7253414 | 1505995 | SCO-spondin | Sspo | 474348 | 1,08 | up   |
| 6110185 | 7253414 | 1506045 | SCO-spondin | Sspo | 474348 | 1,06 | down |
| 6117911 | 7253414 | 1506052 | SCO-spondin | Sspo | 474348 | 1,03 | up   |
| 6123339 | 7253414 | 1505999 | SCO-spondin | Sspo | 474348 | 1,30 | down |
| 6123409 | 7253414 | 1506032 | SCO-spondin | Sspo | 474348 | 1,11 | up   |
| 6125469 | 7253414 | 1506044 | SCO-spondin | Sspo | 474348 | 2,23 | up   |
| 6131809 | 7253414 | 1506025 | SCO-spondin | Sspo | 474348 | 1,03 | down |
| 6131982 | 7253414 | 1506021 | SCO-spondin | Sspo | 474348 | 1,11 | up   |
| 6133564 | 7253414 | 1506017 | SCO-spondin | Sspo | 474348 | 1,08 | up   |
| 6152111 | 7253414 | 1506021 | SCO-spondin | Sspo | 474348 | 1,18 | down |
| 6161773 | 7253414 | 1506005 | SCO-spondin | Sspo | 474348 | 1,23 | up   |
| 6176318 | 7253414 | 1506060 | SCO-spondin | Sspo | 474348 | 1,37 | up   |
| 6184309 | 7253414 | 1506030 | SCO-spondin | Sspo | 474348 | 1,52 | up   |
| 6196112 | 7253414 | 1506077 | SCO-spondin | Sspo | 474348 | 1,06 | up   |
| 6202548 | 7253414 | 1506063 | SCO-spondin | Sspo | 474348 | 1,10 | down |
| 6224915 | 7253414 | 1506027 | SCO-spondin | Sspo | 474348 | 1,28 | up   |
| 6229572 | 7253414 | 1506081 | SCO-spondin | Sspo | 474348 | 1,22 | up   |
| 6242144 | 7253414 | 1506049 | SCO-spondin | Sspo | 474348 | 1,11 | down |
| 6263077 | 7253414 | 1505996 | SCO-spondin | Sspo | 474348 | 1,11 | down |
| 6269326 | 7253414 | 1506004 | SCO-spondin | Sspo | 474348 | 1,43 | up   |
| 6291745 | 7253414 | 1506015 | SCO-spondin | Sspo | 474348 | 1,26 | down |



|         |         |         |             |      |        |      |      |
|---------|---------|---------|-------------|------|--------|------|------|
| 6297574 | 7253414 | 1506020 | SCO-spondin | Sspo | 474348 | 1,12 | down |
| 6299981 | 7253414 | 1506067 | SCO-spondin | Sspo | 474348 | 1,05 | up   |
| 6302962 | 7253414 | 1506006 | SCO-spondin | Sspo | 474348 | 1,08 | down |
| 6311983 | 7253414 | 1506023 | SCO-spondin | Sspo | 474348 | 1,00 | up   |
| 6314126 | 7253414 | 1506069 | SCO-spondin | Sspo | 474348 | 1,72 | up   |
| 6314150 | 7253414 | 1506089 | SCO-spondin | Sspo | 474348 | 1,86 | up   |
| 6332173 | 7253414 | 1506043 | SCO-spondin | Sspo | 474348 | 1,37 | down |
| 6334629 | 7253414 | 1506012 | SCO-spondin | Sspo | 474348 | 1,34 | up   |
| 6341127 | 7253414 | 1506038 | SCO-spondin | Sspo | 474348 | 1,74 | down |
| 6350519 | 7253414 | 1506028 | SCO-spondin | Sspo | 474348 | 1,57 | up   |
| 6353248 | 7253414 | 1506054 | SCO-spondin | Sspo | 474348 | 1,13 | up   |
| 6356462 | 7253414 | 1506034 | SCO-spondin | Sspo | 474348 | 1,14 | down |
| 6359320 | 7253414 | 1506066 | SCO-spondin | Sspo | 474348 | 1,07 | down |
| 6360414 | 7253414 | 1506037 | SCO-spondin | Sspo | 474348 | 1,25 | up   |
| 6363837 | 7253414 | 1506077 | SCO-spondin | Sspo | 474348 | 1,18 | down |
| 6368873 | 7253414 | 1506013 | SCO-spondin | Sspo | 474348 | 2,00 | down |
| 6381099 | 7253414 | 1506077 | SCO-spondin | Sspo | 474348 | 1,12 | up   |
| 6385744 | 7253414 | 1506082 | SCO-spondin | Sspo | 474348 | 1,17 | up   |
| 6387105 | 7253414 | 1506080 | SCO-spondin | Sspo | 474348 | 1,06 | up   |
| 6388599 | 7253414 | 1506003 | SCO-spondin | Sspo | 474348 | 1,13 | up   |
| 6394868 | 7253414 | 1506063 | SCO-spondin | Sspo | 474348 | 1,08 | up   |
| 6401147 | 7253414 | 1506071 | SCO-spondin | Sspo | 474348 | 1,22 | down |
| 6402741 | 7253414 | 1506046 | SCO-spondin | Sspo | 474348 | 1,13 | down |
| 6403855 | 7253414 | 1506036 | SCO-spondin | Sspo | 474348 | 1,02 | up   |
| 6406578 | 7253414 | 1506034 | SCO-spondin | Sspo | 474348 | 1,90 | down |
| 6413476 | 7253414 | 1506008 | SCO-spondin | Sspo | 474348 | 1,24 | up   |
| 6419269 | 7253414 | 1506047 | SCO-spondin | Sspo | 474348 | 1,04 | up   |
| 6432208 | 7253414 | 1506066 | SCO-spondin | Sspo | 474348 | 1,14 | down |
| 6432273 | 7253414 | 1506057 | SCO-spondin | Sspo | 474348 | 1,60 | down |
| 6436474 | 7253414 | 1506088 | SCO-spondin | Sspo | 474348 | 1,10 | down |
| 6440693 | 7253414 | 1506042 | SCO-spondin | Sspo | 474348 | 1,19 | down |
| 6446802 | 7253414 | 1506058 | SCO-spondin | Sspo | 474348 | 1,15 | up   |
| 6449472 | 7253414 | 1505994 | SCO-spondin | Sspo | 474348 | 1,19 | down |
| 6456804 | 7253414 | 1506072 | SCO-spondin | Sspo | 474348 | 1,03 | up   |
| 6456880 | 7253414 | 1506086 | SCO-spondin | Sspo | 474348 | 1,09 | up   |
| 6482607 | 7253414 | 1506047 | SCO-spondin | Sspo | 474348 | 1,49 | down |
| 6484235 | 7253414 | 1506022 | SCO-spondin | Sspo | 474348 | 1,16 | up   |
| 6486337 | 7253414 | 1506025 | SCO-spondin | Sspo | 474348 | 1,02 | up   |
| 6488511 | 7253414 | 1506085 | SCO-spondin | Sspo | 474348 | 1,05 | up   |
| 6492820 | 7253414 | 1506018 | SCO-spondin | Sspo | 474348 | 1,14 | up   |
| 6494904 | 7253414 | 1506026 | SCO-spondin | Sspo | 474348 | 1,24 | down |
| 6498369 | 7253414 | 1506083 | SCO-spondin | Sspo | 474348 | 1,24 | up   |
| 6513085 | 7253414 | 1506089 | SCO-spondin | Sspo | 474348 | 1,04 | down |
| 6528654 | 7253414 | 1506076 | SCO-spondin | Sspo | 474348 | 1,25 | down |
| 6540817 | 7253414 | 1505988 | SCO-spondin | Sspo | 474348 | 1,62 | down |
| 6543171 | 7253414 | 1506084 | SCO-spondin | Sspo | 474348 | 1,80 | up   |
| 6573675 | 7253414 | 1506070 | SCO-spondin | Sspo | 474348 | 1,03 | down |
| 6582869 | 7253414 | 1506077 | SCO-spondin | Sspo | 474348 | 1,03 | up   |
| 6588528 | 7253414 | 1506040 | SCO-spondin | Sspo | 474348 | 1,56 | up   |
| 6589850 | 7253414 | 1506049 | SCO-spondin | Sspo | 474348 | 1,04 | down |
| 6597196 | 7253414 | 1506009 | SCO-spondin | Sspo | 474348 | 1,00 | down |
| 6614156 | 7253414 | 1506000 | SCO-spondin | Sspo | 474348 | 1,06 | down |
| 6618057 | 7253414 | 1506033 | SCO-spondin | Sspo | 474348 | 1,25 | down |
| 6626255 | 7253414 | 1506075 | SCO-spondin | Sspo | 474348 | 1,19 | up   |
| 6667164 | 7253414 | 1505992 | SCO-spondin | Sspo | 474348 | 1,15 | up   |
| 6697377 | 7253414 | 1506033 | SCO-spondin | Sspo | 474348 | 1,34 | up   |

|         |         |         |                              |         |        |      |      |
|---------|---------|---------|------------------------------|---------|--------|------|------|
| 6717576 | 7253414 | 1506011 | SCO-spondin                  | Sspo    | 474348 | 1,22 | down |
| 6720460 | 7253414 | 1506090 | SCO-spondin                  | Sspo    | 474348 | 1,24 | down |
| 6726465 | 7253414 | 1505989 | SCO-spondin                  | Sspo    | 474348 | 1,65 | down |
| 6728080 | 7253414 | 1506041 | SCO-spondin                  | Sspo    | 474348 | 1,18 | up   |
| 6729376 | 7253414 | 1506066 | SCO-spondin                  | Sspo    | 474348 | 1,47 | up   |
| 6733461 | 7253414 | 1506051 | SCO-spondin                  | Sspo    | 474348 | 1,36 | down |
| 6745655 | 7253414 | 1505987 | SCO-spondin                  | Sspo    | 474348 | 1,46 | up   |
| 5620090 | 7116943 | 1169561 | SDA1 domain containing 1     | Sdad1   | 289504 | 2,53 | down |
| 5668225 | 7116943 | 1169560 | SDA1 domain containing 1     | Sdad1   | 289504 | 1,09 | down |
| 5724595 | 7116943 | 1169562 | SDA1 domain containing 1     | Sdad1   | 289504 | 1,75 | down |
| 5823196 | 7116943 | 1169553 | SDA1 domain containing 1     | Sdad1   | 289504 | 1,11 | up   |
| 5875129 | 7116943 | 1169568 | SDA1 domain containing 1     | Sdad1   | 289504 | 1,11 | up   |
| 5916254 | 7116943 | 1169570 | SDA1 domain containing 1     | Sdad1   | 289504 | 1,29 | down |
| 6012378 | 7116943 | 1169569 | SDA1 domain containing 1     | Sdad1   | 289504 | 1,40 | up   |
| 6024320 | 7116943 | 1169556 | SDA1 domain containing 1     | Sdad1   | 289504 | 1,28 | up   |
| 6077137 | 7116943 | 1169563 | SDA1 domain containing 1     | Sdad1   | 289504 | 1,35 | down |
| 6125003 | 7116943 | 1169571 | SDA1 domain containing 1     | Sdad1   | 289504 | 1,00 | down |
| 6259395 | 7116943 | 1169564 | SDA1 domain containing 1     | Sdad1   | 289504 | 1,12 | up   |
| 6266612 | 7116943 | 1169566 | SDA1 domain containing 1     | Sdad1   | 289504 | 1,45 | down |
| 6274534 | 7116943 | 1169559 | SDA1 domain containing 1     | Sdad1   | 289504 | 1,03 | up   |
| 6291742 | 7116943 | 1169557 | SDA1 domain containing 1     | Sdad1   | 289504 | 1,15 | up   |
| 6299797 | 7116943 | 1169565 | SDA1 domain containing 1     | Sdad1   | 289504 | 1,28 | down |
| 6439953 | 7116943 | 1169552 | SDA1 domain containing 1     | Sdad1   | 289504 | 1,10 | down |
| 6454743 | 7116943 | 1169558 | SDA1 domain containing 1     | Sdad1   | 289504 | 1,30 | down |
| 6562279 | 7116943 | 1169567 | SDA1 domain containing 1     | Sdad1   | 289504 | 1,13 | down |
| 6606799 | 7116943 | 1169555 | SDA1 domain containing 1     | Sdad1   | 289504 | 1,08 | down |
| 6706486 | 7116943 | 1169554 | SDA1 domain containing 1     | Sdad1   | 289504 | 2,11 | up   |
| 6723665 | 7116943 | 1169551 | SDA1 domain containing 1     | Sdad1   | 289504 | 1,30 | up   |
| 5799883 | 7127682 | 1195611 | SEC14-like 2 (S. cerevisiae) | Sec14l2 | 116486 | 2,14 | down |
| 5813805 | 7127682 | 1195609 | SEC14-like 2 (S. cerevisiae) | Sec14l2 | 116486 | 1,08 | up   |
| 5850141 | 7127682 | 1195608 | SEC14-like 2 (S. cerevisiae) | Sec14l2 | 116486 | 1,15 | down |
| 6035687 | 7127682 | 1195615 | SEC14-like 2 (S. cerevisiae) | Sec14l2 | 116486 | 1,27 | down |
| 6125689 | 7127682 | 1195604 | SEC14-like 2 (S. cerevisiae) | Sec14l2 | 116486 | 1,27 | down |
| 6196248 | 7127682 | 1195616 | SEC14-like 2 (S. cerevisiae) | Sec14l2 | 116486 | 1,23 | down |
| 6293213 | 7127682 | 1195614 | SEC14-like 2 (S. cerevisiae) | Sec14l2 | 116486 | 1,13 | up   |
| 6299495 | 7127682 | 1195613 | SEC14-like 2 (S. cerevisiae) | Sec14l2 | 116486 | 1,05 | down |
| 6376883 | 7127682 | 1195606 | SEC14-like 2 (S. cerevisiae) | Sec14l2 | 116486 | 1,43 | down |
| 6480328 | 7127682 | 1195607 | SEC14-like 2 (S. cerevisiae) | Sec14l2 | 116486 | 1,05 | up   |
| 6608039 | 7127682 | 1195610 | SEC14-like 2 (S. cerevisiae) | Sec14l2 | 116486 | 1,09 | up   |
| 6643468 | 7127682 | 1195605 | SEC14-like 2 (S. cerevisiae) | Sec14l2 | 116486 | 1,15 | up   |
| 6731758 | 7127682 | 1195612 | SEC14-like 2 (S. cerevisiae) | Sec14l2 | 116486 | 1,21 | down |
| 5619844 | 7120477 | 1178535 | SEC14-like 4 (S. cerevisiae) | Sec14l4 | 498399 | 3,14 | up   |
| 5676476 | 7120477 | 1178535 | SEC14-like 4 (S. cerevisiae) | Sec14l4 | 498399 | 1,10 | down |
| 5770051 | 7120477 | 1178521 | SEC14-like 4 (S. cerevisiae) | Sec14l4 | 498399 | 1,06 | down |
| 5820355 | 7120477 | 1178535 | SEC14-like 4 (S. cerevisiae) | Sec14l4 | 498399 | 1,38 | up   |
| 5821413 | 7120477 | 1178529 | SEC14-like 4 (S. cerevisiae) | Sec14l4 | 498399 | 1,77 | up   |
| 5837597 | 7120477 | 1178528 | SEC14-like 4 (S. cerevisiae) | Sec14l4 | 498399 | 1,13 | down |
| 5966211 | 7120477 | 1178526 | SEC14-like 4 (S. cerevisiae) | Sec14l4 | 498399 | 1,13 | down |
| 6017718 | 7120477 | 1178523 | SEC14-like 4 (S. cerevisiae) | Sec14l4 | 498399 | 1,45 | down |
| 6035904 | 7120477 | 1178521 | SEC14-like 4 (S. cerevisiae) | Sec14l4 | 498399 | 1,19 | down |
| 6195782 | 7120477 | 1178532 | SEC14-like 4 (S. cerevisiae) | Sec14l4 | 498399 | 1,21 | up   |
| 6219890 | 7120477 | 1178535 | SEC14-like 4 (S. cerevisiae) | Sec14l4 | 498399 | 1,32 | down |
| 6245732 | 7120477 | 1178535 | SEC14-like 4 (S. cerevisiae) | Sec14l4 | 498399 | 1,30 | up   |
| 6348909 | 7120477 | 1178534 | SEC14-like 4 (S. cerevisiae) | Sec14l4 | 498399 | 1,55 | up   |
| 6504154 | 7120477 | 1178530 | SEC14-like 4 (S. cerevisiae) | Sec14l4 | 498399 | 1,60 | up   |
| 6560179 | 7120477 | 1178527 | SEC14-like 4 (S. cerevisiae) | Sec14l4 | 498399 | 1,06 | down |

|         |         |         |                                                       |         |        |      |      |
|---------|---------|---------|-------------------------------------------------------|---------|--------|------|------|
| 6644061 | 7120477 | 1178532 | SEC14-like 4 ( <i>S. cerevisiae</i> )                 | Sec14l4 | 498399 | 2,22 | up   |
| 6670500 | 7120477 | 1178533 | SEC14-like 4 ( <i>S. cerevisiae</i> )                 | Sec14l4 | 498399 | 1,15 | down |
| 5655159 | 7236987 | 1465734 | SEC16 homolog A ( <i>S. cerevisiae</i> )              | Sec16a  | 114089 | 1,32 | up   |
| 5766750 | 7236987 | 1465732 | SEC16 homolog A ( <i>S. cerevisiae</i> )              | Sec16a  | 114089 | 1,31 | down |
| 5795659 | 7236987 | 1465738 | SEC16 homolog A ( <i>S. cerevisiae</i> )              | Sec16a  | 114089 | 1,33 | down |
| 5867015 | 7236987 | 1465738 | SEC16 homolog A ( <i>S. cerevisiae</i> )              | Sec16a  | 114089 | 1,04 | down |
| 5937646 | 7236987 | 1465730 | SEC16 homolog A ( <i>S. cerevisiae</i> )              | Sec16a  | 114089 | 1,18 | down |
| 5983197 | 7236987 | 1465733 | SEC16 homolog A ( <i>S. cerevisiae</i> )              | Sec16a  | 114089 | 1,01 | down |
| 6158806 | 7236987 | 1465732 | SEC16 homolog A ( <i>S. cerevisiae</i> )              | Sec16a  | 114089 | 1,48 | up   |
| 6183328 | 7236987 | 1465735 | SEC16 homolog A ( <i>S. cerevisiae</i> )              | Sec16a  | 114089 | 1,05 | down |
| 6264109 | 7236987 | 1465738 | SEC16 homolog A ( <i>S. cerevisiae</i> )              | Sec16a  | 114089 | 1,11 | down |
| 6411061 | 7236987 | 1465731 | SEC16 homolog A ( <i>S. cerevisiae</i> )              | Sec16a  | 114089 | 1,38 | down |
| 6465601 | 7236987 | 1465732 | SEC16 homolog A ( <i>S. cerevisiae</i> )              | Sec16a  | 114089 | 1,21 | up   |
| 6550509 | 7236987 | 1465737 | SEC16 homolog A ( <i>S. cerevisiae</i> )              | Sec16a  | 114089 | 1,39 | down |
| 6581436 | 7236987 | 1465736 | SEC16 homolog A ( <i>S. cerevisiae</i> )              | Sec16a  | 114089 | 1,13 | down |
| 5627766 | 7106706 | 1143845 | SEC16 homolog B ( <i>S. cerevisiae</i> )              | Sec16b  | 89868  | 1,03 | down |
| 5635090 | 7106706 | 1143832 | SEC16 homolog B ( <i>S. cerevisiae</i> )              | Sec16b  | 89868  | 1,01 | down |
| 5654464 | 7106706 | 1143840 | SEC16 homolog B ( <i>S. cerevisiae</i> )              | Sec16b  | 89868  | 1,33 | down |
| 5666188 | 7106706 | 1143849 | SEC16 homolog B ( <i>S. cerevisiae</i> )              | Sec16b  | 89868  | 1,38 | up   |
| 5725875 | 7106706 | 1143839 | SEC16 homolog B ( <i>S. cerevisiae</i> )              | Sec16b  | 89868  | 1,05 | up   |
| 5762219 | 7106706 | 1143848 | SEC16 homolog B ( <i>S. cerevisiae</i> )              | Sec16b  | 89868  | 1,49 | down |
| 5833534 | 7106706 | 1143847 | SEC16 homolog B ( <i>S. cerevisiae</i> )              | Sec16b  | 89868  | 1,52 | down |
| 5897170 | 7106706 | 1143834 | SEC16 homolog B ( <i>S. cerevisiae</i> )              | Sec16b  | 89868  | 1,74 | down |
| 5934938 | 7106706 | 1143829 | SEC16 homolog B ( <i>S. cerevisiae</i> )              | Sec16b  | 89868  | 1,21 | up   |
| 5957700 | 7106706 | 1143844 | SEC16 homolog B ( <i>S. cerevisiae</i> )              | Sec16b  | 89868  | 1,16 | down |
| 5970383 | 7106706 | 1143846 | SEC16 homolog B ( <i>S. cerevisiae</i> )              | Sec16b  | 89868  | 1,70 | down |
| 5993160 | 7106706 | 1143853 | SEC16 homolog B ( <i>S. cerevisiae</i> )              | Sec16b  | 89868  | 1,18 | up   |
| 5996727 | 7106706 | 1143850 | SEC16 homolog B ( <i>S. cerevisiae</i> )              | Sec16b  | 89868  | 1,05 | up   |
| 6021938 | 7106706 | 1143852 | SEC16 homolog B ( <i>S. cerevisiae</i> )              | Sec16b  | 89868  | 1,12 | up   |
| 6065804 | 7106706 | 1143833 | SEC16 homolog B ( <i>S. cerevisiae</i> )              | Sec16b  | 89868  | 1,15 | up   |
| 6071160 | 7106706 | 1143831 | SEC16 homolog B ( <i>S. cerevisiae</i> )              | Sec16b  | 89868  | 1,17 | down |
| 6079393 | 7106706 | 1143851 | SEC16 homolog B ( <i>S. cerevisiae</i> )              | Sec16b  | 89868  | 1,20 | up   |
| 6118666 | 7106706 | 1143845 | SEC16 homolog B ( <i>S. cerevisiae</i> )              | Sec16b  | 89868  | 1,14 | down |
| 6120992 | 7106706 | 1143842 | SEC16 homolog B ( <i>S. cerevisiae</i> )              | Sec16b  | 89868  | 1,23 | up   |
| 6141525 | 7106706 | 1143853 | SEC16 homolog B ( <i>S. cerevisiae</i> )              | Sec16b  | 89868  | 1,60 | up   |
| 6179676 | 7106706 | 1143828 | SEC16 homolog B ( <i>S. cerevisiae</i> )              | Sec16b  | 89868  | 1,69 | down |
| 6214218 | 7106706 | 1143830 | SEC16 homolog B ( <i>S. cerevisiae</i> )              | Sec16b  | 89868  | 1,43 | up   |
| 6236940 | 7106706 | 1143836 | SEC16 homolog B ( <i>S. cerevisiae</i> )              | Sec16b  | 89868  | 1,71 | down |
| 6296684 | 7106706 | 1143828 | SEC16 homolog B ( <i>S. cerevisiae</i> )              | Sec16b  | 89868  | 1,22 | up   |
| 6335778 | 7106706 | 1143837 | SEC16 homolog B ( <i>S. cerevisiae</i> )              | Sec16b  | 89868  | 1,65 | up   |
| 6375497 | 7106706 | 1143838 | SEC16 homolog B ( <i>S. cerevisiae</i> )              | Sec16b  | 89868  | 1,09 | down |
| 6438973 | 7106706 | 1143849 | SEC16 homolog B ( <i>S. cerevisiae</i> )              | Sec16b  | 89868  | 1,04 | down |
| 6438974 | 7106706 | 1143843 | SEC16 homolog B ( <i>S. cerevisiae</i> )              | Sec16b  | 89868  | 1,27 | down |
| 6445718 | 7106706 | 1143841 | SEC16 homolog B ( <i>S. cerevisiae</i> )              | Sec16b  | 89868  | 1,14 | up   |
| 6493014 | 7106706 | 1143852 | SEC16 homolog B ( <i>S. cerevisiae</i> )              | Sec16b  | 89868  | 2,03 | down |
| 6505255 | 7106706 | 1143845 | SEC16 homolog B ( <i>S. cerevisiae</i> )              | Sec16b  | 89868  | 1,56 | up   |
| 6726792 | 7106706 | 1143835 | SEC16 homolog B ( <i>S. cerevisiae</i> )              | Sec16b  | 89868  | 1,07 | down |
| 5643631 | 7077597 | 1074406 | secreted protein, acidic, cysteine-rich (osteonectin) | Sparc   | 24791  | 1,21 | up   |
| 5759748 | 7077597 | 1074402 | secreted protein, acidic, cysteine-rich (osteonectin) | Sparc   | 24791  | 1,09 | up   |
| 5815573 | 7077597 | 1074405 | secreted protein, acidic, cysteine-rich (osteonectin) | Sparc   | 24791  | 2,26 | down |
| 5974112 | 7077597 | 1074403 | secreted protein, acidic, cysteine-rich (osteonectin) | Sparc   | 24791  | 1,37 | up   |
| 5997008 | 7077597 | 1074401 | secreted protein, acidic, cysteine-rich (osteonectin) | Sparc   | 24791  | 1,06 | down |
| 6120130 | 7077597 | 1074404 | secreted protein, acidic, cysteine-rich (osteonectin) | Sparc   | 24791  | 1,15 | down |
| 6130322 | 7077597 | 1074407 | secreted protein, acidic, cysteine-rich (osteonectin) | Sparc   | 24791  | 1,27 | up   |
| 6226702 | 7077597 | 1074398 | secreted protein, acidic, cysteine-rich (osteonectin) | Sparc   | 24791  | 1,19 | down |
| 6551254 | 7077597 | 1074400 | secreted protein, acidic, cysteine-rich (osteonectin) | Sparc   | 24791  | 1,60 | up   |

|         |         |         |                                                                                |        |        |      |      |
|---------|---------|---------|--------------------------------------------------------------------------------|--------|--------|------|------|
| 6603903 | 7077597 | 1074399 | secreted protein, acidic, cysteine-rich (osteonectin)                          | Sparc  | 24791  | 1,12 | down |
| 5677774 | 7357672 | 1763726 | selenocysteine lyase                                                           | Scly   | 363285 | 1,07 | down |
| 5814257 | 7357672 | 1763728 | selenocysteine lyase                                                           | Scly   | 363285 | 1,55 | up   |
| 6047673 | 7357672 | 1763727 | selenocysteine lyase                                                           | Scly   | 363285 | 1,30 | up   |
| 6148690 | 7357672 | 1763724 | selenocysteine lyase                                                           | Scly   | 363285 | 1,22 | down |
| 6298828 | 7357672 | 1763729 | selenocysteine lyase                                                           | Scly   | 363285 | 1,60 | down |
| 6346016 | 7357672 | 1763718 | selenocysteine lyase                                                           | Scly   | 363285 | 1,30 | up   |
| 6354762 | 7357672 | 1763723 | selenocysteine lyase                                                           | Scly   | 363285 | 1,48 | up   |
| 6377179 | 7357672 | 1763721 | selenocysteine lyase                                                           | Scly   | 363285 | 1,34 | up   |
| 6411892 | 7357672 | 1763719 | selenocysteine lyase                                                           | Scly   | 363285 | 1,72 | down |
| 6417685 | 7357672 | 1763717 | selenocysteine lyase                                                           | Scly   | 363285 | 3,12 | down |
| 6564437 | 7357672 | 1763725 | selenocysteine lyase                                                           | Scly   | 363285 | 1,19 | up   |
| 6618725 | 7357672 | 1763722 | selenocysteine lyase                                                           | Scly   | 363285 | 1,24 | up   |
| 6737440 | 7357672 | 1763720 | selenocysteine lyase                                                           | Scly   | 363285 | 1,22 | down |
| 6143650 | 7190182 | 1350177 | selenoprotein P, plasma, 1                                                     | Sepp1  | 29360  | 2,39 | up   |
| 6157465 | 7190182 | 1350181 | selenoprotein P, plasma, 1                                                     | Sepp1  | 29360  | 1,56 | down |
| 6183128 | 7190182 | 1350180 | selenoprotein P, plasma, 1                                                     | Sepp1  | 29360  | 1,17 | down |
| 6321169 | 7190182 | 1350181 | selenoprotein P, plasma, 1                                                     | Sepp1  | 29360  | 1,20 | up   |
| 6385863 | 7190182 | 1350181 | selenoprotein P, plasma, 1                                                     | Sepp1  | 29360  | 1,35 | down |
| 6436620 | 7190182 | 1350179 | selenoprotein P, plasma, 1                                                     | Sepp1  | 29360  | 1,19 | down |
| 6468368 | 7190182 | 1350181 | selenoprotein P, plasma, 1                                                     | Sepp1  | 29360  | 1,46 | down |
| 6542605 | 7190182 | 1350182 | selenoprotein P, plasma, 1                                                     | Sepp1  | 29360  | 1,75 | up   |
| 6610814 | 7190182 | 1350178 | selenoprotein P, plasma, 1                                                     | Sepp1  | 29360  | 2,15 | up   |
| 6685886 | 7190182 | 1350182 | selenoprotein P, plasma, 1                                                     | Sepp1  | 29360  | 1,41 | up   |
| 5699702 | 7349944 | 1744902 | sema domain, immunoglobulin domain (Ig), short basic domain, secreted, (semapl | Sema3f | 315996 | 1,25 | down |
| 5793251 | 7349944 | 1744908 | sema domain, immunoglobulin domain (Ig), short basic domain, secreted, (semapl | Sema3f | 315996 | 1,33 | down |
| 5832953 | 7349944 | 1744900 | sema domain, immunoglobulin domain (Ig), short basic domain, secreted, (semapl | Sema3f | 315996 | 1,05 | up   |
| 5846989 | 7349944 | 1744909 | sema domain, immunoglobulin domain (Ig), short basic domain, secreted, (semapl | Sema3f | 315996 | 1,09 | down |
| 5909496 | 7349944 | 1744911 | sema domain, immunoglobulin domain (Ig), short basic domain, secreted, (semapl | Sema3f | 315996 | 1,43 | up   |
| 5922482 | 7349944 | 1744910 | sema domain, immunoglobulin domain (Ig), short basic domain, secreted, (semapl | Sema3f | 315996 | 1,05 | up   |
| 5945307 | 7349944 | 1744924 | sema domain, immunoglobulin domain (Ig), short basic domain, secreted, (semapl | Sema3f | 315996 | 1,83 | down |
| 5967504 | 7349944 | 1744917 | sema domain, immunoglobulin domain (Ig), short basic domain, secreted, (semapl | Sema3f | 315996 | 1,11 | up   |
| 6036324 | 7349944 | 1744924 | sema domain, immunoglobulin domain (Ig), short basic domain, secreted, (semapl | Sema3f | 315996 | 1,16 | up   |
| 6237747 | 7349944 | 1744900 | sema domain, immunoglobulin domain (Ig), short basic domain, secreted, (semapl | Sema3f | 315996 | 1,15 | down |
| 6244219 | 7349944 | 1744901 | sema domain, immunoglobulin domain (Ig), short basic domain, secreted, (semapl | Sema3f | 315996 | 1,23 | down |
| 6408081 | 7349944 | 1744906 | sema domain, immunoglobulin domain (Ig), short basic domain, secreted, (semapl | Sema3f | 315996 | 1,61 | up   |
| 6418768 | 7349944 | 1744922 | sema domain, immunoglobulin domain (Ig), short basic domain, secreted, (semapl | Sema3f | 315996 | 1,26 | down |
| 6426660 | 7349944 | 1744916 | sema domain, immunoglobulin domain (Ig), short basic domain, secreted, (semapl | Sema3f | 315996 | 1,10 | down |
| 6426845 | 7349944 | 1744915 | sema domain, immunoglobulin domain (Ig), short basic domain, secreted, (semapl | Sema3f | 315996 | 1,05 | up   |
| 6445152 | 7349944 | 1744904 | sema domain, immunoglobulin domain (Ig), short basic domain, secreted, (semapl | Sema3f | 315996 | 1,76 | up   |
| 6488093 | 7349944 | 1744918 | sema domain, immunoglobulin domain (Ig), short basic domain, secreted, (semapl | Sema3f | 315996 | 1,11 | down |
| 6597510 | 7349944 | 1744907 | sema domain, immunoglobulin domain (Ig), short basic domain, secreted, (semapl | Sema3f | 315996 | 1,34 | down |
| 6665290 | 7349944 | 1744922 | sema domain, immunoglobulin domain (Ig), short basic domain, secreted, (semapl | Sema3f | 315996 | 1,23 | down |
| 6693098 | 7349944 | 1744905 | sema domain, immunoglobulin domain (Ig), short basic domain, secreted, (semapl | Sema3f | 315996 | 1,14 | down |
| 6702587 | 7349944 | 1744912 | sema domain, immunoglobulin domain (Ig), short basic domain, secreted, (semapl | Sema3f | 315996 | 1,13 | down |
| 6703208 | 7349944 | 1744903 | sema domain, immunoglobulin domain (Ig), short basic domain, secreted, (semapl | Sema3f | 315996 | 1,21 | down |
| 5663388 | 7261019 | 1525246 | sema domain, immunoglobulin domain (Ig), short basic domain, secreted, (semapl | Sema3c | 296787 | 1,02 | up   |
| 5688720 | 7261019 | 1525252 | sema domain, immunoglobulin domain (Ig), short basic domain, secreted, (semapl | Sema3c | 296787 | 1,02 | down |
| 5833581 | 7261019 | 1525242 | sema domain, immunoglobulin domain (Ig), short basic domain, secreted, (semapl | Sema3c | 296787 | 1,33 | up   |
| 5873519 | 7261019 | 1525259 | sema domain, immunoglobulin domain (Ig), short basic domain, secreted, (semapl | Sema3c | 296787 | 1,26 | up   |
| 5894898 | 7261019 | 1525262 | sema domain, immunoglobulin domain (Ig), short basic domain, secreted, (semapl | Sema3c | 296787 | 1,72 | up   |
| 5914191 | 7261019 | 1525243 | sema domain, immunoglobulin domain (Ig), short basic domain, secreted, (semapl | Sema3c | 296787 | 1,12 | up   |
| 5960762 | 7261019 | 1525256 | sema domain, immunoglobulin domain (Ig), short basic domain, secreted, (semapl | Sema3c | 296787 | 1,33 | up   |
| 5973191 | 7261019 | 1525242 | sema domain, immunoglobulin domain (Ig), short basic domain, secreted, (semapl | Sema3c | 296787 | 1,09 | up   |
| 6083071 | 7261019 | 1525243 | sema domain, immunoglobulin domain (Ig), short basic domain, secreted, (semapl | Sema3c | 296787 | 1,54 | down |
| 6102928 | 7261019 | 1525249 | sema domain, immunoglobulin domain (Ig), short basic domain, secreted, (semapl | Sema3c | 296787 | 1,89 | down |

|         |         |         |                                                                                |        |        |      |      |
|---------|---------|---------|--------------------------------------------------------------------------------|--------|--------|------|------|
| 6113360 | 7261019 | 1525258 | sema domain, immunoglobulin domain (Ig), short basic domain, secreted, (semapl | Sema3c | 296787 | 1,31 | down |
| 6124896 | 7261019 | 1525264 | sema domain, immunoglobulin domain (Ig), short basic domain, secreted, (semapl | Sema3c | 296787 | 1,20 | up   |
| 6238152 | 7261019 | 1525250 | sema domain, immunoglobulin domain (Ig), short basic domain, secreted, (semapl | Sema3c | 296787 | 1,01 | down |
| 6238778 | 7261019 | 1525248 | sema domain, immunoglobulin domain (Ig), short basic domain, secreted, (semapl | Sema3c | 296787 | 1,19 | down |
| 6386776 | 7261019 | 1525261 | sema domain, immunoglobulin domain (Ig), short basic domain, secreted, (semapl | Sema3c | 296787 | 1,27 | up   |
| 6467855 | 7261019 | 1525257 | sema domain, immunoglobulin domain (Ig), short basic domain, secreted, (semapl | Sema3c | 296787 | 1,62 | up   |
| 6539931 | 7261019 | 1525279 | sema domain, immunoglobulin domain (Ig), short basic domain, secreted, (semapl | Sema3c | 296787 | 1,07 | up   |
| 6541733 | 7261019 | 1525265 | sema domain, immunoglobulin domain (Ig), short basic domain, secreted, (semapl | Sema3c | 296787 | 1,08 | down |
| 6544099 | 7261019 | 1525256 | sema domain, immunoglobulin domain (Ig), short basic domain, secreted, (semapl | Sema3c | 296787 | 1,01 | up   |
| 6638555 | 7261019 | 1525260 | sema domain, immunoglobulin domain (Ig), short basic domain, secreted, (semapl | Sema3c | 296787 | 1,01 | down |
| 5671807 | 7261147 | 1525689 | sema domain, immunoglobulin domain (Ig), short basic domain, secreted, (semapl | Sema3e | 296789 | 1,01 | up   |
| 5724815 | 7261147 | 1525710 | sema domain, immunoglobulin domain (Ig), short basic domain, secreted, (semapl | Sema3e | 296789 | 1,34 | up   |
| 5775211 | 7261147 | 1525686 | sema domain, immunoglobulin domain (Ig), short basic domain, secreted, (semapl | Sema3e | 296789 | 1,09 | up   |
| 5784665 | 7261147 | 1525674 | sema domain, immunoglobulin domain (Ig), short basic domain, secreted, (semapl | Sema3e | 296789 | 1,51 | down |
| 5856000 | 7261147 | 1525683 | sema domain, immunoglobulin domain (Ig), short basic domain, secreted, (semapl | Sema3e | 296789 | 2,15 | up   |
| 5902231 | 7261147 | 1525697 | sema domain, immunoglobulin domain (Ig), short basic domain, secreted, (semapl | Sema3e | 296789 | 1,43 | up   |
| 6091343 | 7261147 | 1525701 | sema domain, immunoglobulin domain (Ig), short basic domain, secreted, (semapl | Sema3e | 296789 | 1,56 | up   |
| 6093426 | 7261147 | 1525669 | sema domain, immunoglobulin domain (Ig), short basic domain, secreted, (semapl | Sema3e | 296789 | 1,18 | down |
| 6163728 | 7261147 | 1525676 | sema domain, immunoglobulin domain (Ig), short basic domain, secreted, (semapl | Sema3e | 296789 | 1,55 | down |
| 6195650 | 7261147 | 1525682 | sema domain, immunoglobulin domain (Ig), short basic domain, secreted, (semapl | Sema3e | 296789 | 1,04 | up   |
| 6294744 | 7261147 | 1525675 | sema domain, immunoglobulin domain (Ig), short basic domain, secreted, (semapl | Sema3e | 296789 | 1,35 | down |
| 6361418 | 7261147 | 1525678 | sema domain, immunoglobulin domain (Ig), short basic domain, secreted, (semapl | Sema3e | 296789 | 1,60 | down |
| 6362270 | 7261147 | 1525681 | sema domain, immunoglobulin domain (Ig), short basic domain, secreted, (semapl | Sema3e | 296789 | 1,15 | up   |
| 6376939 | 7261147 | 1525673 | sema domain, immunoglobulin domain (Ig), short basic domain, secreted, (semapl | Sema3e | 296789 | 1,24 | down |
| 6384868 | 7261147 | 1525685 | sema domain, immunoglobulin domain (Ig), short basic domain, secreted, (semapl | Sema3e | 296789 | 1,22 | up   |
| 6574527 | 7261147 | 1525670 | sema domain, immunoglobulin domain (Ig), short basic domain, secreted, (semapl | Sema3e | 296789 | 1,30 | down |
| 6588478 | 7261147 | 1525701 | sema domain, immunoglobulin domain (Ig), short basic domain, secreted, (semapl | Sema3e | 296789 | 1,01 | up   |
| 6684160 | 7261147 | 1525700 | sema domain, immunoglobulin domain (Ig), short basic domain, secreted, (semapl | Sema3e | 296789 | 1,45 | down |
| 6710563 | 7261147 | 1525670 | sema domain, immunoglobulin domain (Ig), short basic domain, secreted, (semapl | Sema3e | 296789 | 1,00 | down |
| 6731255 | 7261147 | 1525677 | sema domain, immunoglobulin domain (Ig), short basic domain, secreted, (semapl | Sema3e | 296789 | 1,63 | down |
| 5690512 | 7042382 | 991301  | sema domain, immunoglobulin domain (Ig), transmembrane domain (TM) and shc     | Sema4g | 361764 | 1,77 | down |
| 5698100 | 7042382 | 991297  | sema domain, immunoglobulin domain (Ig), transmembrane domain (TM) and shc     | Sema4g | 361764 | 1,01 | up   |
| 5731300 | 7042382 | 991298  | sema domain, immunoglobulin domain (Ig), transmembrane domain (TM) and shc     | Sema4g | 361764 | 1,10 | up   |
| 5779112 | 7042382 | 991301  | sema domain, immunoglobulin domain (Ig), transmembrane domain (TM) and shc     | Sema4g | 361764 | 1,30 | up   |
| 5790042 | 7042382 | 991296  | sema domain, immunoglobulin domain (Ig), transmembrane domain (TM) and shc     | Sema4g | 361764 | 1,54 | up   |
| 5814218 | 7042382 | 991290  | sema domain, immunoglobulin domain (Ig), transmembrane domain (TM) and shc     | Sema4g | 361764 | 1,03 | down |
| 5900833 | 7042382 | 991301  | sema domain, immunoglobulin domain (Ig), transmembrane domain (TM) and shc     | Sema4g | 361764 | 1,07 | down |
| 5915474 | 7042382 | 991301  | sema domain, immunoglobulin domain (Ig), transmembrane domain (TM) and shc     | Sema4g | 361764 | 1,12 | down |
| 5945183 | 7042382 | 991295  | sema domain, immunoglobulin domain (Ig), transmembrane domain (TM) and shc     | Sema4g | 361764 | 1,12 | down |
| 6018853 | 7042382 | 991293  | sema domain, immunoglobulin domain (Ig), transmembrane domain (TM) and shc     | Sema4g | 361764 | 1,16 | up   |
| 6052299 | 7042382 | 991295  | sema domain, immunoglobulin domain (Ig), transmembrane domain (TM) and shc     | Sema4g | 361764 | 1,22 | down |
| 6187947 | 7042382 | 991294  | sema domain, immunoglobulin domain (Ig), transmembrane domain (TM) and shc     | Sema4g | 361764 | 1,78 | down |
| 6199147 | 7042382 | 991301  | sema domain, immunoglobulin domain (Ig), transmembrane domain (TM) and shc     | Sema4g | 361764 | 1,04 | down |
| 6262529 | 7042382 | 991301  | sema domain, immunoglobulin domain (Ig), transmembrane domain (TM) and shc     | Sema4g | 361764 | 1,22 | down |
| 6274019 | 7042382 | 991289  | sema domain, immunoglobulin domain (Ig), transmembrane domain (TM) and shc     | Sema4g | 361764 | 1,03 | down |
| 6414356 | 7042382 | 991299  | sema domain, immunoglobulin domain (Ig), transmembrane domain (TM) and shc     | Sema4g | 361764 | 1,04 | down |
| 6437159 | 7042382 | 991291  | sema domain, immunoglobulin domain (Ig), transmembrane domain (TM) and shc     | Sema4g | 361764 | 1,15 | up   |
| 6474165 | 7042382 | 991289  | sema domain, immunoglobulin domain (Ig), transmembrane domain (TM) and shc     | Sema4g | 361764 | 1,35 | up   |
| 6528549 | 7042382 | 991295  | sema domain, immunoglobulin domain (Ig), transmembrane domain (TM) and shc     | Sema4g | 361764 | 1,15 | up   |
| 6533274 | 7042382 | 991301  | sema domain, immunoglobulin domain (Ig), transmembrane domain (TM) and shc     | Sema4g | 361764 | 1,30 | down |
| 6607608 | 7042382 | 991291  | sema domain, immunoglobulin domain (Ig), transmembrane domain (TM) and shc     | Sema4g | 361764 | 1,18 | up   |
| 6692531 | 7042382 | 991296  | sema domain, immunoglobulin domain (Ig), transmembrane domain (TM) and shc     | Sema4g | 361764 | 1,20 | down |
| 6711592 | 7042382 | 991300  | sema domain, immunoglobulin domain (Ig), transmembrane domain (TM) and shc     | Sema4g | 361764 | 1,28 | up   |
| 5707483 | 7191594 | 1354242 | sema domain, seven thrombospondin repeats (type 1 and type 1-like), transmembr | Sema5a | 310207 | 1,28 | down |
| 5715592 | 7191594 | 1354167 | sema domain, seven thrombospondin repeats (type 1 and type 1-like), transmembr | Sema5a | 310207 | 1,31 | up   |
| 5717532 | 7191594 | 1354178 | sema domain, seven thrombospondin repeats (type 1 and type 1-like), transmembr | Sema5a | 310207 | 1,12 | up   |

|         |         |         |                                                                                |         |        |      |      |
|---------|---------|---------|--------------------------------------------------------------------------------|---------|--------|------|------|
| 5742478 | 7191594 | 1354247 | sema domain, seven thrombospondin repeats (type 1 and type 1-like), transmembr | Sema5a  | 310207 | 1,25 | down |
| 5745876 | 7191594 | 1354248 | sema domain, seven thrombospondin repeats (type 1 and type 1-like), transmembr | Sema5a  | 310207 | 1,13 | up   |
| 5757096 | 7191594 | 1354231 | sema domain, seven thrombospondin repeats (type 1 and type 1-like), transmembr | Sema5a  | 310207 | 1,13 | up   |
| 5832024 | 7191594 | 1354227 | sema domain, seven thrombospondin repeats (type 1 and type 1-like), transmembr | Sema5a  | 310207 | 1,52 | up   |
| 5852243 | 7191594 | 1354236 | sema domain, seven thrombospondin repeats (type 1 and type 1-like), transmembr | Sema5a  | 310207 | 1,34 | down |
| 5857690 | 7191594 | 1354245 | sema domain, seven thrombospondin repeats (type 1 and type 1-like), transmembr | Sema5a  | 310207 | 1,01 | down |
| 5972542 | 7191594 | 1354216 | sema domain, seven thrombospondin repeats (type 1 and type 1-like), transmembr | Sema5a  | 310207 | 1,23 | down |
| 5974426 | 7191594 | 1354203 | sema domain, seven thrombospondin repeats (type 1 and type 1-like), transmembr | Sema5a  | 310207 | 1,47 | down |
| 5975270 | 7191594 | 1354243 | sema domain, seven thrombospondin repeats (type 1 and type 1-like), transmembr | Sema5a  | 310207 | 1,00 | up   |
| 5992560 | 7191594 | 1354212 | sema domain, seven thrombospondin repeats (type 1 and type 1-like), transmembr | Sema5a  | 310207 | 1,44 | down |
| 6001644 | 7191594 | 1354215 | sema domain, seven thrombospondin repeats (type 1 and type 1-like), transmembr | Sema5a  | 310207 | 1,06 | down |
| 6118515 | 7191594 | 1354244 | sema domain, seven thrombospondin repeats (type 1 and type 1-like), transmembr | Sema5a  | 310207 | 1,48 | down |
| 6140547 | 7191594 | 1354232 | sema domain, seven thrombospondin repeats (type 1 and type 1-like), transmembr | Sema5a  | 310207 | 2,10 | up   |
| 6167085 | 7191594 | 1354226 | sema domain, seven thrombospondin repeats (type 1 and type 1-like), transmembr | Sema5a  | 310207 | 1,55 | up   |
| 6176096 | 7191594 | 1354240 | sema domain, seven thrombospondin repeats (type 1 and type 1-like), transmembr | Sema5a  | 310207 | 1,26 | down |
| 6188982 | 7191594 | 1354236 | sema domain, seven thrombospondin repeats (type 1 and type 1-like), transmembr | Sema5a  | 310207 | 1,54 | up   |
| 6220526 | 7191594 | 1354175 | sema domain, seven thrombospondin repeats (type 1 and type 1-like), transmembr | Sema5a  | 310207 | 1,07 | down |
| 6276790 | 7191594 | 1354242 | sema domain, seven thrombospondin repeats (type 1 and type 1-like), transmembr | Sema5a  | 310207 | 1,09 | down |
| 6282752 | 7191594 | 1354191 | sema domain, seven thrombospondin repeats (type 1 and type 1-like), transmembr | Sema5a  | 310207 | 2,05 | down |
| 6288040 | 7191594 | 1354248 | sema domain, seven thrombospondin repeats (type 1 and type 1-like), transmembr | Sema5a  | 310207 | 1,10 | up   |
| 6337211 | 7191594 | 1354232 | sema domain, seven thrombospondin repeats (type 1 and type 1-like), transmembr | Sema5a  | 310207 | 1,30 | up   |
| 6357051 | 7191594 | 1354208 | sema domain, seven thrombospondin repeats (type 1 and type 1-like), transmembr | Sema5a  | 310207 | 1,09 | down |
| 6469817 | 7191594 | 1354193 | sema domain, seven thrombospondin repeats (type 1 and type 1-like), transmembr | Sema5a  | 310207 | 1,20 | up   |
| 6512823 | 7191594 | 1354248 | sema domain, seven thrombospondin repeats (type 1 and type 1-like), transmembr | Sema5a  | 310207 | 1,58 | down |
| 6551822 | 7191594 | 1354207 | sema domain, seven thrombospondin repeats (type 1 and type 1-like), transmembr | Sema5a  | 310207 | 1,16 | down |
| 6581344 | 7191594 | 1354240 | sema domain, seven thrombospondin repeats (type 1 and type 1-like), transmembr | Sema5a  | 310207 | 1,03 | down |
| 6589730 | 7191594 | 1354247 | sema domain, seven thrombospondin repeats (type 1 and type 1-like), transmembr | Sema5a  | 310207 | 1,81 | down |
| 6742565 | 7191594 | 1354238 | sema domain, seven thrombospondin repeats (type 1 and type 1-like), transmembr | Sema5a  | 310207 | 1,30 | down |
| 5643820 | 7232029 | 1452782 | sema domain, transmembrane domain (TM), and cytoplasmic domain, (semaphori     | Sema6d  | 311384 | 1,51 | up   |
| 5676260 | 7232029 | 1452786 | sema domain, transmembrane domain (TM), and cytoplasmic domain, (semaphori     | Sema6d  | 311384 | 1,11 | up   |
| 5683383 | 7232029 | 1452773 | sema domain, transmembrane domain (TM), and cytoplasmic domain, (semaphori     | Sema6d  | 311384 | 1,27 | up   |
| 5685099 | 7232029 | 1452786 | sema domain, transmembrane domain (TM), and cytoplasmic domain, (semaphori     | Sema6d  | 311384 | 1,24 | down |
| 5689411 | 7232029 | 1452779 | sema domain, transmembrane domain (TM), and cytoplasmic domain, (semaphori     | Sema6d  | 311384 | 1,47 | down |
| 5719319 | 7232029 | 1452788 | sema domain, transmembrane domain (TM), and cytoplasmic domain, (semaphori     | Sema6d  | 311384 | 1,09 | up   |
| 5736729 | 7232029 | 1452774 | sema domain, transmembrane domain (TM), and cytoplasmic domain, (semaphori     | Sema6d  | 311384 | 1,29 | up   |
| 5805146 | 7232029 | 1452784 | sema domain, transmembrane domain (TM), and cytoplasmic domain, (semaphori     | Sema6d  | 311384 | 1,11 | up   |
| 5884182 | 7232029 | 1452775 | sema domain, transmembrane domain (TM), and cytoplasmic domain, (semaphori     | Sema6d  | 311384 | 1,41 | up   |
| 5972543 | 7232029 | 1452788 | sema domain, transmembrane domain (TM), and cytoplasmic domain, (semaphori     | Sema6d  | 311384 | 1,26 | up   |
| 6034818 | 7232029 | 1452772 | sema domain, transmembrane domain (TM), and cytoplasmic domain, (semaphori     | Sema6d  | 311384 | 1,27 | up   |
| 6044411 | 7232029 | 1452787 | sema domain, transmembrane domain (TM), and cytoplasmic domain, (semaphori     | Sema6d  | 311384 | 1,14 | down |
| 6092984 | 7232029 | 1452791 | sema domain, transmembrane domain (TM), and cytoplasmic domain, (semaphori     | Sema6d  | 311384 | 1,39 | down |
| 6228967 | 7232029 | 1452791 | sema domain, transmembrane domain (TM), and cytoplasmic domain, (semaphori     | Sema6d  | 311384 | 2,35 | down |
| 6324625 | 7232029 | 1452785 | sema domain, transmembrane domain (TM), and cytoplasmic domain, (semaphori     | Sema6d  | 311384 | 1,23 | up   |
| 6451929 | 7232029 | 1452783 | sema domain, transmembrane domain (TM), and cytoplasmic domain, (semaphori     | Sema6d  | 311384 | 1,21 | up   |
| 6458336 | 7232029 | 1452790 | sema domain, transmembrane domain (TM), and cytoplasmic domain, (semaphori     | Sema6d  | 311384 | 1,01 | up   |
| 6631989 | 7232029 | 1452778 | sema domain, transmembrane domain (TM), and cytoplasmic domain, (semaphori     | Sema6d  | 311384 | 1,27 | down |
| 6644060 | 7232029 | 1452790 | sema domain, transmembrane domain (TM), and cytoplasmic domain, (semaphori     | Sema6d  | 311384 | 1,13 | down |
| 6651720 | 7232029 | 1452777 | sema domain, transmembrane domain (TM), and cytoplasmic domain, (semaphori     | Sema6d  | 311384 | 1,50 | down |
| 6662594 | 7232029 | 1452781 | sema domain, transmembrane domain (TM), and cytoplasmic domain, (semaphori     | Sema6d  | 311384 | 1,28 | up   |
| 6709482 | 7232029 | 1452791 | sema domain, transmembrane domain (TM), and cytoplasmic domain, (semaphori     | Sema6d  | 311384 | 1,10 | up   |
| 5640684 | 7057471 | 1025889 | septin 1                                                                       | sept-01 | 293507 | 2,59 | down |
| 5759173 | 7057471 | 1025883 | septin 1                                                                       | sept-01 | 293507 | 1,14 | down |
| 5765400 | 7057471 | 1025888 | septin 1                                                                       | sept-01 | 293507 | 1,09 | down |
| 6003891 | 7057471 | 1025887 | septin 1                                                                       | sept-01 | 293507 | 1,32 | up   |
| 6093554 | 7057471 | 1025882 | septin 1                                                                       | sept-01 | 293507 | 1,18 | up   |
| 6145348 | 7057471 | 1025892 | septin 1                                                                       | sept-01 | 293507 | 1,23 | down |

|         |         |         |                                                                                        |           |        |      |      |
|---------|---------|---------|----------------------------------------------------------------------------------------|-----------|--------|------|------|
| 6234220 | 7057471 | 1025886 | septin 1                                                                               | sept-01   | 293507 | 1,12 | up   |
| 6276589 | 7057471 | 1025881 | septin 1                                                                               | sept-01   | 293507 | 1,35 | up   |
| 6276818 | 7057471 | 1025884 | septin 1                                                                               | sept-01   | 293507 | 1,09 | up   |
| 6300177 | 7057471 | 1025885 | septin 1                                                                               | sept-01   | 293507 | 1,25 | down |
| 6443647 | 7057471 | 1025890 | septin 1                                                                               | sept-01   | 293507 | 1,18 | down |
| 6471550 | 7057471 | 1025889 | septin 1                                                                               | sept-01   | 293507 | 1,07 | down |
| 6600756 | 7057471 | 1025891 | septin 1                                                                               | sept-01   | 293507 | 1,03 | down |
| 5738207 | 7333924 | 1704634 | septin 7                                                                               | sept-07   | 64551  | 2,16 | down |
| 5756668 | 7333924 | 1704626 | septin 7                                                                               | sept-07   | 64551  | 1,08 | up   |
| 5778817 | 7333924 | 1704633 | septin 7                                                                               | sept-07   | 64551  | 1,18 | down |
| 5951948 | 7333924 | 1704634 | septin 7                                                                               | sept-07   | 64551  | 1,46 | down |
| 5976043 | 7333924 | 1704624 | septin 7                                                                               | sept-07   | 64551  | 1,15 | down |
| 6064576 | 7333924 | 1704630 | septin 7                                                                               | sept-07   | 64551  | 1,36 | up   |
| 6117163 | 7333924 | 1704631 | septin 7                                                                               | sept-07   | 64551  | 1,14 | down |
| 6126084 | 7333924 | 1704632 | septin 7                                                                               | sept-07   | 64551  | 1,05 | up   |
| 6197985 | 7333924 | 1704623 | septin 7                                                                               | sept-07   | 64551  | 1,03 | up   |
| 6222179 | 7333924 | 1704622 | septin 7                                                                               | sept-07   | 64551  | 1,43 | down |
| 6224403 | 7333924 | 1704628 | septin 7                                                                               | sept-07   | 64551  | 1,40 | up   |
| 6225149 | 7333924 | 1704624 | septin 7                                                                               | sept-07   | 64551  | 1,13 | down |
| 6319337 | 7333924 | 1704625 | septin 7                                                                               | sept-07   | 64551  | 1,10 | up   |
| 6468526 | 7333924 | 1704629 | septin 7                                                                               | sept-07   | 64551  | 1,14 | down |
| 6613985 | 7333924 | 1704627 | septin 7                                                                               | sept-07   | 64551  | 1,05 | down |
| 5799905 | 7309966 | 1647492 | serine (or cysteine) peptidase inhibitor, clade A (alpha-1 antiproteinase, antitrypsin | Serpina10 | 171154 | 1,32 | up   |
| 5888693 | 7309966 | 1647496 | serine (or cysteine) peptidase inhibitor, clade A (alpha-1 antiproteinase, antitrypsin | Serpina10 | 171154 | 1,74 | down |
| 5897162 | 7309966 | 1647493 | serine (or cysteine) peptidase inhibitor, clade A (alpha-1 antiproteinase, antitrypsin | Serpina10 | 171154 | 1,34 | up   |
| 6113808 | 7309966 | 1647495 | serine (or cysteine) peptidase inhibitor, clade A (alpha-1 antiproteinase, antitrypsin | Serpina10 | 171154 | 1,15 | up   |
| 6336950 | 7309966 | 1647494 | serine (or cysteine) peptidase inhibitor, clade A (alpha-1 antiproteinase, antitrypsin | Serpina10 | 171154 | 1,33 | up   |
| 6477145 | 7309966 | 1647494 | serine (or cysteine) peptidase inhibitor, clade A (alpha-1 antiproteinase, antitrypsin | Serpina10 | 171154 | 1,41 | down |
| 6480872 | 7309966 | 1647496 | serine (or cysteine) peptidase inhibitor, clade A (alpha-1 antiproteinase, antitrypsin | Serpina10 | 171154 | 1,05 | up   |
| 6722773 | 7309966 | 1647496 | serine (or cysteine) peptidase inhibitor, clade A (alpha-1 antiproteinase, antitrypsin | Serpina10 | 171154 | 2,17 | down |
| 5645392 | 7163946 | 1284282 | serine (or cysteine) peptidase inhibitor, clade B, member 9                            | Serpina9  | 361241 | 2,42 | up   |
| 5958331 | 7163946 | 1284286 | serine (or cysteine) peptidase inhibitor, clade B, member 9                            | Serpina9  | 361241 | 1,11 | down |
| 5965874 | 7163946 | 1284284 | serine (or cysteine) peptidase inhibitor, clade B, member 9                            | Serpina9  | 361241 | 1,53 | up   |
| 6026440 | 7163946 | 1284283 | serine (or cysteine) peptidase inhibitor, clade B, member 9                            | Serpina9  | 361241 | 2,00 | up   |
| 6123316 | 7163946 | 1284285 | serine (or cysteine) peptidase inhibitor, clade B, member 9                            | Serpina9  | 361241 | 1,35 | up   |
| 6232788 | 7163946 | 1284289 | serine (or cysteine) peptidase inhibitor, clade B, member 9                            | Serpina9  | 361241 | 2,44 | down |
| 6404688 | 7163946 | 1284287 | serine (or cysteine) peptidase inhibitor, clade B, member 9                            | Serpina9  | 361241 | 1,23 | down |
| 6506470 | 7163946 | 1284288 | serine (or cysteine) peptidase inhibitor, clade B, member 9                            | Serpina9  | 361241 | 1,21 | up   |
| 6631420 | 7163946 | 1284289 | serine (or cysteine) peptidase inhibitor, clade B, member 9                            | Serpina9  | 361241 | 2,26 | down |
| 5648312 | 7241130 | 1476708 | serine (or cysteine) peptidase inhibitor, clade G, member 1                            | Serpina1  | 295703 | 1,06 | up   |
| 5656049 | 7241130 | 1476710 | serine (or cysteine) peptidase inhibitor, clade G, member 1                            | Serpina1  | 295703 | 1,12 | up   |
| 5778451 | 7241130 | 1476708 | serine (or cysteine) peptidase inhibitor, clade G, member 1                            | Serpina1  | 295703 | 1,02 | up   |
| 5779501 | 7241130 | 1476713 | serine (or cysteine) peptidase inhibitor, clade G, member 1                            | Serpina1  | 295703 | 1,28 | up   |
| 5925737 | 7241130 | 1476708 | serine (or cysteine) peptidase inhibitor, clade G, member 1                            | Serpina1  | 295703 | 1,02 | up   |
| 6094286 | 7241130 | 1476712 | serine (or cysteine) peptidase inhibitor, clade G, member 1                            | Serpina1  | 295703 | 1,06 | down |
| 6122375 | 7241130 | 1476709 | serine (or cysteine) peptidase inhibitor, clade G, member 1                            | Serpina1  | 295703 | 1,04 | up   |
| 6141348 | 7241130 | 1476713 | serine (or cysteine) peptidase inhibitor, clade G, member 1                            | Serpina1  | 295703 | 1,08 | up   |
| 6286391 | 7241130 | 1476707 | serine (or cysteine) peptidase inhibitor, clade G, member 1                            | Serpina1  | 295703 | 1,58 | down |
| 6558928 | 7241130 | 1476711 | serine (or cysteine) peptidase inhibitor, clade G, member 1                            | Serpina1  | 295703 | 1,05 | up   |
| 6710711 | 7241130 | 1476714 | serine (or cysteine) peptidase inhibitor, clade G, member 1                            | Serpina1  | 295703 | 2,51 | down |
| 6722232 | 7241130 | 1476708 | serine (or cysteine) peptidase inhibitor, clade G, member 1                            | Serpina1  | 295703 | 1,20 | down |
| 5630024 | 7319292 | 1670486 | serine hydrolase-like 2                                                                | Serhl2    | 500911 | 1,02 | up   |
| 5672229 | 7319292 | 1670501 | serine hydrolase-like 2                                                                | Serhl2    | 500911 | 1,11 | up   |
| 5741173 | 7319292 | 1670483 | serine hydrolase-like 2                                                                | Serhl2    | 500911 | 1,12 | up   |
| 5831562 | 7319292 | 1670497 | serine hydrolase-like 2                                                                | Serhl2    | 500911 | 2,17 | down |
| 5898787 | 7319292 | 1670500 | serine hydrolase-like 2                                                                | Serhl2    | 500911 | 1,10 | down |

|         |         |         |                                                |         |        |      |      |
|---------|---------|---------|------------------------------------------------|---------|--------|------|------|
| 6002417 | 7319292 | 1670499 | serine hydrolase-like 2                        | Serhl2  | 500911 | 1,33 | up   |
| 6074387 | 7319292 | 1670497 | serine hydrolase-like 2                        | Serhl2  | 500911 | 1,08 | up   |
| 6145015 | 7319292 | 1670487 | serine hydrolase-like 2                        | Serhl2  | 500911 | 1,18 | up   |
| 6369939 | 7319292 | 1670503 | serine hydrolase-like 2                        | Serhl2  | 500911 | 1,55 | down |
| 6442122 | 7319292 | 1670486 | serine hydrolase-like 2                        | Serhl2  | 500911 | 1,02 | down |
| 6448128 | 7319292 | 1670495 | serine hydrolase-like 2                        | Serhl2  | 500911 | 1,03 | up   |
| 6450048 | 7319292 | 1670490 | serine hydrolase-like 2                        | Serhl2  | 500911 | 1,53 | down |
| 6526170 | 7319292 | 1670494 | serine hydrolase-like 2                        | Serhl2  | 500911 | 1,55 | up   |
| 6549744 | 7319292 | 1670502 | serine hydrolase-like 2                        | Serhl2  | 500911 | 2,33 | down |
| 6592282 | 7319292 | 1670489 | serine hydrolase-like 2                        | Serhl2  | 500911 | 1,17 | up   |
| 6613419 | 7319292 | 1670488 | serine hydrolase-like 2                        | Serhl2  | 500911 | 1,00 | down |
| 6694388 | 7319292 | 1670496 | serine hydrolase-like 2                        | Serhl2  | 500911 | 1,10 | down |
| 6736309 | 7319292 | 1670504 | serine hydrolase-like 2                        | Serhl2  | 500911 | 1,19 | up   |
| 6744237 | 7319292 | 1670498 | serine hydrolase-like 2                        | Serhl2  | 500911 | 1,20 | up   |
| 5657658 | 7078198 | 1075612 | serine hydroxymethyltransferase 1 (soluble)    | Shmt1   | 287379 | 1,15 | up   |
| 5684784 | 7078198 | 1075604 | serine hydroxymethyltransferase 1 (soluble)    | Shmt1   | 287379 | 1,09 | up   |
| 5704434 | 7078198 | 1075610 | serine hydroxymethyltransferase 1 (soluble)    | Shmt1   | 287379 | 1,05 | down |
| 5899876 | 7078198 | 1075616 | serine hydroxymethyltransferase 1 (soluble)    | Shmt1   | 287379 | 1,04 | up   |
| 6149690 | 7078198 | 1075602 | serine hydroxymethyltransferase 1 (soluble)    | Shmt1   | 287379 | 1,57 | down |
| 6182033 | 7078198 | 1075608 | serine hydroxymethyltransferase 1 (soluble)    | Shmt1   | 287379 | 1,40 | up   |
| 6283785 | 7078198 | 1075611 | serine hydroxymethyltransferase 1 (soluble)    | Shmt1   | 287379 | 1,11 | up   |
| 6283935 | 7078198 | 1075609 | serine hydroxymethyltransferase 1 (soluble)    | Shmt1   | 287379 | 1,16 | up   |
| 6302582 | 7078198 | 1075613 | serine hydroxymethyltransferase 1 (soluble)    | Shmt1   | 287379 | 1,07 | down |
| 6306594 | 7078198 | 1075605 | serine hydroxymethyltransferase 1 (soluble)    | Shmt1   | 287379 | 1,28 | up   |
| 6310253 | 7078198 | 1075600 | serine hydroxymethyltransferase 1 (soluble)    | Shmt1   | 287379 | 1,20 | down |
| 6346759 | 7078198 | 1075610 | serine hydroxymethyltransferase 1 (soluble)    | Shmt1   | 287379 | 1,19 | up   |
| 6379629 | 7078198 | 1075600 | serine hydroxymethyltransferase 1 (soluble)    | Shmt1   | 287379 | 1,22 | up   |
| 6425060 | 7078198 | 1075606 | serine hydroxymethyltransferase 1 (soluble)    | Shmt1   | 287379 | 1,09 | up   |
| 6450832 | 7078198 | 1075615 | serine hydroxymethyltransferase 1 (soluble)    | Shmt1   | 287379 | 1,19 | down |
| 6532146 | 7078198 | 1075600 | serine hydroxymethyltransferase 1 (soluble)    | Shmt1   | 287379 | 1,00 | up   |
| 6649074 | 7078198 | 1075617 | serine hydroxymethyltransferase 1 (soluble)    | Shmt1   | 287379 | 1,11 | down |
| 5668121 | 7356333 | 1760496 | serine/threonine kinase 11 interacting protein | Stk11ip | 301535 | 1,42 | up   |
| 5714579 | 7356333 | 1760490 | serine/threonine kinase 11 interacting protein | Stk11ip | 301535 | 1,24 | down |
| 5738866 | 7356333 | 1760504 | serine/threonine kinase 11 interacting protein | Stk11ip | 301535 | 1,25 | up   |
| 5740441 | 7356333 | 1760491 | serine/threonine kinase 11 interacting protein | Stk11ip | 301535 | 1,12 | up   |
| 5768993 | 7356333 | 1760497 | serine/threonine kinase 11 interacting protein | Stk11ip | 301535 | 1,23 | up   |
| 5844855 | 7356333 | 1760496 | serine/threonine kinase 11 interacting protein | Stk11ip | 301535 | 1,04 | up   |
| 6039494 | 7356333 | 1760498 | serine/threonine kinase 11 interacting protein | Stk11ip | 301535 | 1,48 | down |
| 6066413 | 7356333 | 1760489 | serine/threonine kinase 11 interacting protein | Stk11ip | 301535 | 1,16 | down |
| 6070161 | 7356333 | 1760505 | serine/threonine kinase 11 interacting protein | Stk11ip | 301535 | 1,45 | up   |
| 6104953 | 7356333 | 1760506 | serine/threonine kinase 11 interacting protein | Stk11ip | 301535 | 1,15 | up   |
| 6125518 | 7356333 | 1760507 | serine/threonine kinase 11 interacting protein | Stk11ip | 301535 | 1,15 | down |
| 6170528 | 7356333 | 1760506 | serine/threonine kinase 11 interacting protein | Stk11ip | 301535 | 1,63 | up   |
| 6188782 | 7356333 | 1760492 | serine/threonine kinase 11 interacting protein | Stk11ip | 301535 | 1,10 | up   |
| 6191544 | 7356333 | 1760486 | serine/threonine kinase 11 interacting protein | Stk11ip | 301535 | 1,47 | up   |
| 6264703 | 7356333 | 1760501 | serine/threonine kinase 11 interacting protein | Stk11ip | 301535 | 1,01 | up   |
| 6273519 | 7356333 | 1760502 | serine/threonine kinase 11 interacting protein | Stk11ip | 301535 | 1,07 | down |
| 6323805 | 7356333 | 1760498 | serine/threonine kinase 11 interacting protein | Stk11ip | 301535 | 1,44 | down |
| 6353710 | 7356333 | 1760503 | serine/threonine kinase 11 interacting protein | Stk11ip | 301535 | 1,18 | up   |
| 6418438 | 7356333 | 1760483 | serine/threonine kinase 11 interacting protein | Stk11ip | 301535 | 1,09 | up   |
| 6449950 | 7356333 | 1760482 | serine/threonine kinase 11 interacting protein | Stk11ip | 301535 | 2,23 | down |
| 6486369 | 7356333 | 1760485 | serine/threonine kinase 11 interacting protein | Stk11ip | 301535 | 1,51 | up   |
| 6535738 | 7356333 | 1760487 | serine/threonine kinase 11 interacting protein | Stk11ip | 301535 | 1,13 | up   |
| 6552560 | 7356333 | 1760506 | serine/threonine kinase 11 interacting protein | Stk11ip | 301535 | 1,06 | down |
| 6560644 | 7356333 | 1760495 | serine/threonine kinase 11 interacting protein | Stk11ip | 301535 | 2,22 | up   |
| 6569623 | 7356333 | 1760498 | serine/threonine kinase 11 interacting protein | Stk11ip | 301535 | 1,02 | down |



|         |         |         |                                                                                   |         |        |      |      |
|---------|---------|---------|-----------------------------------------------------------------------------------|---------|--------|------|------|
| 6584963 | 7356333 | 1760495 | serine/threonine kinase 11 interacting protein                                    | Stk11ip | 301535 | 1,07 | down |
| 6594273 | 7356333 | 1760488 | serine/threonine kinase 11 interacting protein                                    | Stk11ip | 301535 | 1,30 | up   |
| 6609152 | 7356333 | 1760484 | serine/threonine kinase 11 interacting protein                                    | Stk11ip | 301535 | 1,10 | up   |
| 6629352 | 7356333 | 1760493 | serine/threonine kinase 11 interacting protein                                    | Stk11ip | 301535 | 1,48 | up   |
| 5978580 | 7377583 | 1815446 | serine/threonine protein kinase MST4                                              | Mst4    | 317589 | 1,69 | up   |
| 6209518 | 7377583 | 1815445 | serine/threonine protein kinase MST4                                              | Mst4    | 317589 | 1,53 | up   |
| 6370086 | 7377583 | 1815445 | serine/threonine protein kinase MST4                                              | Mst4    | 317589 | 1,59 | up   |
| 6391069 | 7377583 | 1815463 | serine/threonine protein kinase MST4                                              | Mst4    | 317589 | 1,16 | up   |
| 6490944 | 7377583 | 1815445 | serine/threonine protein kinase MST4                                              | Mst4    | 317589 | 2,09 | up   |
| 5624943 | 7108170 | 1147576 | serologically defined colon cancer antigen 8                                      | Sdccag8 | 305002 | 1,09 | up   |
| 5686519 | 7108170 | 1147580 | serologically defined colon cancer antigen 8                                      | Sdccag8 | 305002 | 1,14 | down |
| 5694223 | 7108170 | 1147570 | serologically defined colon cancer antigen 8                                      | Sdccag8 | 305002 | 1,70 | down |
| 5731331 | 7108170 | 1147566 | serologically defined colon cancer antigen 8                                      | Sdccag8 | 305002 | 1,03 | up   |
| 5733643 | 7108170 | 1147563 | serologically defined colon cancer antigen 8                                      | Sdccag8 | 305002 | 2,04 | up   |
| 5771535 | 7108170 | 1147571 | serologically defined colon cancer antigen 8                                      | Sdccag8 | 305002 | 1,17 | up   |
| 5881161 | 7108170 | 1147567 | serologically defined colon cancer antigen 8                                      | Sdccag8 | 305002 | 1,29 | down |
| 5900397 | 7108170 | 1147574 | serologically defined colon cancer antigen 8                                      | Sdccag8 | 305002 | 1,27 | down |
| 5922295 | 7108170 | 1147568 | serologically defined colon cancer antigen 8                                      | Sdccag8 | 305002 | 1,55 | down |
| 6055541 | 7108170 | 1147580 | serologically defined colon cancer antigen 8                                      | Sdccag8 | 305002 | 1,23 | down |
| 6074343 | 7108170 | 1147564 | serologically defined colon cancer antigen 8                                      | Sdccag8 | 305002 | 1,35 | down |
| 6167375 | 7108170 | 1147579 | serologically defined colon cancer antigen 8                                      | Sdccag8 | 305002 | 1,06 | up   |
| 6350719 | 7108170 | 1147578 | serologically defined colon cancer antigen 8                                      | Sdccag8 | 305002 | 1,02 | up   |
| 6369658 | 7108170 | 1147575 | serologically defined colon cancer antigen 8                                      | Sdccag8 | 305002 | 1,73 | down |
| 6403727 | 7108170 | 1147565 | serologically defined colon cancer antigen 8                                      | Sdccag8 | 305002 | 1,13 | up   |
| 6438287 | 7108170 | 1147569 | serologically defined colon cancer antigen 8                                      | Sdccag8 | 305002 | 1,32 | down |
| 6443894 | 7108170 | 1147573 | serologically defined colon cancer antigen 8                                      | Sdccag8 | 305002 | 1,14 | down |
| 6458512 | 7108170 | 1147563 | serologically defined colon cancer antigen 8                                      | Sdccag8 | 305002 | 1,44 | down |
| 6483043 | 7108170 | 1147572 | serologically defined colon cancer antigen 8                                      | Sdccag8 | 305002 | 1,16 | up   |
| 6503715 | 7108170 | 1147571 | serologically defined colon cancer antigen 8                                      | Sdccag8 | 305002 | 2,08 | up   |
| 6567626 | 7108170 | 1147577 | serologically defined colon cancer antigen 8                                      | Sdccag8 | 305002 | 1,04 | down |
| 5702396 | 7351949 | 1749811 | serum response factor (c-fos serum response element-binding transcription factor) | Srf     | 501099 | 1,05 | down |
| 5802820 | 7351949 | 1749805 | serum response factor (c-fos serum response element-binding transcription factor) | Srf     | 501099 | 1,43 | up   |
| 5811999 | 7351949 | 1749805 | serum response factor (c-fos serum response element-binding transcription factor) | Srf     | 501099 | 1,23 | up   |
| 5933489 | 7351949 | 1749804 | serum response factor (c-fos serum response element-binding transcription factor) | Srf     | 501099 | 1,65 | down |
| 6008665 | 7351949 | 1749804 | serum response factor (c-fos serum response element-binding transcription factor) | Srf     | 501099 | 2,06 | down |
| 6129257 | 7351949 | 1749810 | serum response factor (c-fos serum response element-binding transcription factor) | Srf     | 501099 | 1,41 | up   |
| 6377426 | 7351949 | 1749807 | serum response factor (c-fos serum response element-binding transcription factor) | Srf     | 501099 | 1,23 | up   |
| 6404261 | 7351949 | 1749811 | serum response factor (c-fos serum response element-binding transcription factor) | Srf     | 501099 | 1,04 | down |
| 6426466 | 7351949 | 1749809 | serum response factor (c-fos serum response element-binding transcription factor) | Srf     | 501099 | 1,16 | up   |
| 6554065 | 7351949 | 1749806 | serum response factor (c-fos serum response element-binding transcription factor) | Srf     | 501099 | 1,51 | up   |
| 6616889 | 7351949 | 1749808 | serum response factor (c-fos serum response element-binding transcription factor) | Srf     | 501099 | 1,13 | up   |
| 6631699 | 7351949 | 1749809 | serum response factor (c-fos serum response element-binding transcription factor) | Srf     | 501099 | 1,15 | up   |
| 5804909 | 7177520 | 1318660 | SET binding protein 1                                                             | Setbp1  | 291423 | 1,04 | up   |
| 5853553 | 7177520 | 1318660 | SET binding protein 1                                                             | Setbp1  | 291423 | 1,02 | down |
| 6351301 | 7177520 | 1318660 | SET binding protein 1                                                             | Setbp1  | 291423 | 1,07 | up   |
| 6670307 | 7177520 | 1318660 | SET binding protein 1                                                             | Setbp1  | 291423 | 1,08 | up   |
| 6717376 | 7177520 | 1318660 | SET binding protein 1                                                             | Setbp1  | 291423 | 1,67 | down |
| 5673183 | 7133749 | 1210800 | SGT1, suppressor of G2 allele of SKP1 (S. cerevisiae)                             | Sugt1   | 290408 | 1,43 | up   |
| 5834989 | 7133749 | 1210816 | SGT1, suppressor of G2 allele of SKP1 (S. cerevisiae)                             | Sugt1   | 290408 | 1,21 | up   |
| 5864001 | 7133749 | 1210818 | SGT1, suppressor of G2 allele of SKP1 (S. cerevisiae)                             | Sugt1   | 290408 | 1,01 | up   |
| 5886377 | 7133749 | 1210809 | SGT1, suppressor of G2 allele of SKP1 (S. cerevisiae)                             | Sugt1   | 290408 | 1,12 | down |
| 6014464 | 7133749 | 1210806 | SGT1, suppressor of G2 allele of SKP1 (S. cerevisiae)                             | Sugt1   | 290408 | 1,29 | up   |
| 6042517 | 7133749 | 1210814 | SGT1, suppressor of G2 allele of SKP1 (S. cerevisiae)                             | Sugt1   | 290408 | 1,64 | up   |
| 6079869 | 7133749 | 1210816 | SGT1, suppressor of G2 allele of SKP1 (S. cerevisiae)                             | Sugt1   | 290408 | 1,39 | down |
| 6082296 | 7133749 | 1210818 | SGT1, suppressor of G2 allele of SKP1 (S. cerevisiae)                             | Sugt1   | 290408 | 1,13 | up   |
| 6207660 | 7133749 | 1210801 | SGT1, suppressor of G2 allele of SKP1 (S. cerevisiae)                             | Sugt1   | 290408 | 1,66 | down |

|         |         |         |                                                                |        |        |      |      |
|---------|---------|---------|----------------------------------------------------------------|--------|--------|------|------|
| 6208992 | 7133749 | 1210812 | SGT1, suppressor of G2 allele of SKP1 ( <i>S. cerevisiae</i> ) | Sugt1  | 290408 | 1,04 | up   |
| 6230602 | 7133749 | 1210818 | SGT1, suppressor of G2 allele of SKP1 ( <i>S. cerevisiae</i> ) | Sugt1  | 290408 | 1,14 | down |
| 6388110 | 7133749 | 1210811 | SGT1, suppressor of G2 allele of SKP1 ( <i>S. cerevisiae</i> ) | Sugt1  | 290408 | 1,44 | down |
| 6529156 | 7133749 | 1210800 | SGT1, suppressor of G2 allele of SKP1 ( <i>S. cerevisiae</i> ) | Sugt1  | 290408 | 1,39 | down |
| 6580842 | 7133749 | 1210802 | SGT1, suppressor of G2 allele of SKP1 ( <i>S. cerevisiae</i> ) | Sugt1  | 290408 | 1,04 | up   |
| 6606065 | 7133749 | 1210805 | SGT1, suppressor of G2 allele of SKP1 ( <i>S. cerevisiae</i> ) | Sugt1  | 290408 | 2,38 | up   |
| 6671988 | 7133749 | 1210803 | SGT1, suppressor of G2 allele of SKP1 ( <i>S. cerevisiae</i> ) | Sugt1  | 290408 | 1,08 | down |
| 5644332 | 7038746 | 982533  | SH3 and multiple ankyrin repeat domains 2                      | Shank2 | 171093 | 3,10 | up   |
| 5731858 | 7038746 | 982521  | SH3 and multiple ankyrin repeat domains 2                      | Shank2 | 171093 | 1,02 | up   |
| 5753746 | 7038746 | 982536  | SH3 and multiple ankyrin repeat domains 2                      | Shank2 | 171093 | 1,64 | down |
| 5760013 | 7038746 | 982528  | SH3 and multiple ankyrin repeat domains 2                      | Shank2 | 171093 | 1,01 | up   |
| 5865065 | 7038746 | 982518  | SH3 and multiple ankyrin repeat domains 2                      | Shank2 | 171093 | 1,59 | up   |
| 5943273 | 7038746 | 982519  | SH3 and multiple ankyrin repeat domains 2                      | Shank2 | 171093 | 1,18 | up   |
| 5966618 | 7038746 | 982523  | SH3 and multiple ankyrin repeat domains 2                      | Shank2 | 171093 | 1,38 | up   |
| 5976638 | 7038746 | 982533  | SH3 and multiple ankyrin repeat domains 2                      | Shank2 | 171093 | 1,54 | down |
| 6004920 | 7038746 | 982526  | SH3 and multiple ankyrin repeat domains 2                      | Shank2 | 171093 | 1,13 | down |
| 6054667 | 7038746 | 982532  | SH3 and multiple ankyrin repeat domains 2                      | Shank2 | 171093 | 1,14 | down |
| 6130839 | 7038746 | 982531  | SH3 and multiple ankyrin repeat domains 2                      | Shank2 | 171093 | 1,05 | down |
| 6134246 | 7038746 | 982517  | SH3 and multiple ankyrin repeat domains 2                      | Shank2 | 171093 | 1,79 | up   |
| 6198374 | 7038746 | 982528  | SH3 and multiple ankyrin repeat domains 2                      | Shank2 | 171093 | 1,69 | down |
| 6229716 | 7038746 | 982520  | SH3 and multiple ankyrin repeat domains 2                      | Shank2 | 171093 | 1,57 | up   |
| 6237814 | 7038746 | 982535  | SH3 and multiple ankyrin repeat domains 2                      | Shank2 | 171093 | 1,65 | down |
| 6251076 | 7038746 | 982524  | SH3 and multiple ankyrin repeat domains 2                      | Shank2 | 171093 | 2,20 | up   |
| 6257886 | 7038746 | 982516  | SH3 and multiple ankyrin repeat domains 2                      | Shank2 | 171093 | 1,10 | up   |
| 6261933 | 7038746 | 982525  | SH3 and multiple ankyrin repeat domains 2                      | Shank2 | 171093 | 1,76 | up   |
| 6358693 | 7038746 | 982524  | SH3 and multiple ankyrin repeat domains 2                      | Shank2 | 171093 | 1,20 | down |
| 6361923 | 7038746 | 982524  | SH3 and multiple ankyrin repeat domains 2                      | Shank2 | 171093 | 1,35 | down |
| 6385546 | 7038746 | 982534  | SH3 and multiple ankyrin repeat domains 2                      | Shank2 | 171093 | 1,44 | up   |
| 6420823 | 7038746 | 982530  | SH3 and multiple ankyrin repeat domains 2                      | Shank2 | 171093 | 1,16 | down |
| 6433242 | 7038746 | 982521  | SH3 and multiple ankyrin repeat domains 2                      | Shank2 | 171093 | 1,03 | up   |
| 6474327 | 7038746 | 982523  | SH3 and multiple ankyrin repeat domains 2                      | Shank2 | 171093 | 1,44 | down |
| 6512547 | 7038746 | 982527  | SH3 and multiple ankyrin repeat domains 2                      | Shank2 | 171093 | 1,43 | up   |
| 6520443 | 7038746 | 982528  | SH3 and multiple ankyrin repeat domains 2                      | Shank2 | 171093 | 1,29 | down |
| 6550457 | 7038746 | 982529  | SH3 and multiple ankyrin repeat domains 2                      | Shank2 | 171093 | 1,54 | down |
| 6573299 | 7038746 | 982522  | SH3 and multiple ankyrin repeat domains 2                      | Shank2 | 171093 | 2,67 | up   |
| 6648994 | 7038746 | 982515  | SH3 and multiple ankyrin repeat domains 2                      | Shank2 | 171093 | 1,89 | up   |
| 5692471 | 7319807 | 1671987 | SH3 and multiple ankyrin repeat domains 3                      | Shank3 | 59312  | 1,46 | down |
| 5708429 | 7319807 | 1671972 | SH3 and multiple ankyrin repeat domains 3                      | Shank3 | 59312  | 1,54 | up   |
| 5816673 | 7319807 | 1671984 | SH3 and multiple ankyrin repeat domains 3                      | Shank3 | 59312  | 1,51 | down |
| 5900862 | 7319807 | 1671990 | SH3 and multiple ankyrin repeat domains 3                      | Shank3 | 59312  | 1,52 | down |
| 5907632 | 7319807 | 1671968 | SH3 and multiple ankyrin repeat domains 3                      | Shank3 | 59312  | 1,77 | up   |
| 5955507 | 7319807 | 1671990 | SH3 and multiple ankyrin repeat domains 3                      | Shank3 | 59312  | 1,38 | down |
| 5976703 | 7319807 | 1671967 | SH3 and multiple ankyrin repeat domains 3                      | Shank3 | 59312  | 1,08 | down |
| 5977518 | 7319807 | 1671975 | SH3 and multiple ankyrin repeat domains 3                      | Shank3 | 59312  | 2,11 | down |
| 6025117 | 7319807 | 1671973 | SH3 and multiple ankyrin repeat domains 3                      | Shank3 | 59312  | 1,06 | up   |
| 6118011 | 7319807 | 1671971 | SH3 and multiple ankyrin repeat domains 3                      | Shank3 | 59312  | 1,25 | up   |
| 6158632 | 7319807 | 1671966 | SH3 and multiple ankyrin repeat domains 3                      | Shank3 | 59312  | 1,05 | up   |
| 6193146 | 7319807 | 1671977 | SH3 and multiple ankyrin repeat domains 3                      | Shank3 | 59312  | 1,17 | up   |
| 6220969 | 7319807 | 1671990 | SH3 and multiple ankyrin repeat domains 3                      | Shank3 | 59312  | 1,29 | up   |
| 6226831 | 7319807 | 1671985 | SH3 and multiple ankyrin repeat domains 3                      | Shank3 | 59312  | 1,49 | down |
| 6227162 | 7319807 | 1671982 | SH3 and multiple ankyrin repeat domains 3                      | Shank3 | 59312  | 1,80 | down |
| 6271481 | 7319807 | 1671981 | SH3 and multiple ankyrin repeat domains 3                      | Shank3 | 59312  | 1,13 | down |
| 6289695 | 7319807 | 1671985 | SH3 and multiple ankyrin repeat domains 3                      | Shank3 | 59312  | 1,47 | up   |
| 6303761 | 7319807 | 1671990 | SH3 and multiple ankyrin repeat domains 3                      | Shank3 | 59312  | 1,22 | down |
| 6303967 | 7319807 | 1671986 | SH3 and multiple ankyrin repeat domains 3                      | Shank3 | 59312  | 1,18 | up   |
| 6326952 | 7319807 | 1671966 | SH3 and multiple ankyrin repeat domains 3                      | Shank3 | 59312  | 1,25 | up   |

|         |         |         |                                                               |        |        |      |      |
|---------|---------|---------|---------------------------------------------------------------|--------|--------|------|------|
| 6363847 | 7319807 | 1671970 | SH3 and multiple ankyrin repeat domains 3                     | Shank3 | 59312  | 1,26 | down |
| 6401271 | 7319807 | 1671989 | SH3 and multiple ankyrin repeat domains 3                     | Shank3 | 59312  | 1,25 | down |
| 6403791 | 7319807 | 1671975 | SH3 and multiple ankyrin repeat domains 3                     | Shank3 | 59312  | 1,14 | up   |
| 6436944 | 7319807 | 1671978 | SH3 and multiple ankyrin repeat domains 3                     | Shank3 | 59312  | 1,46 | down |
| 6458077 | 7319807 | 1671989 | SH3 and multiple ankyrin repeat domains 3                     | Shank3 | 59312  | 1,12 | up   |
| 6514351 | 7319807 | 1671991 | SH3 and multiple ankyrin repeat domains 3                     | Shank3 | 59312  | 2,32 | down |
| 6530907 | 7319807 | 1671988 | SH3 and multiple ankyrin repeat domains 3                     | Shank3 | 59312  | 1,27 | down |
| 6583400 | 7319807 | 1671986 | SH3 and multiple ankyrin repeat domains 3                     | Shank3 | 59312  | 1,24 | down |
| 6680023 | 7319807 | 1671976 | SH3 and multiple ankyrin repeat domains 3                     | Shank3 | 59312  | 1,00 | down |
| 6691204 | 7319807 | 1671976 | SH3 and multiple ankyrin repeat domains 3                     | Shank3 | 59312  | 1,22 | up   |
| 6719968 | 7319807 | 1671983 | SH3 and multiple ankyrin repeat domains 3                     | Shank3 | 59312  | 1,90 | down |
| 6723749 | 7319807 | 1671979 | SH3 and multiple ankyrin repeat domains 3                     | Shank3 | 59312  | 2,02 | up   |
| 6737415 | 7319807 | 1671974 | SH3 and multiple ankyrin repeat domains 3                     | Shank3 | 59312  | 1,21 | up   |
| 6738153 | 7319807 | 1671969 | SH3 and multiple ankyrin repeat domains 3                     | Shank3 | 59312  | 1,09 | down |
| 6743150 | 7319807 | 1671980 | SH3 and multiple ankyrin repeat domains 3                     | Shank3 | 59312  | 1,10 | up   |
| 5892082 | 7127257 | 1194799 | SH3-domain binding protein 2                                  | Sh3bp2 | 305450 | 1,20 | up   |
| 6154842 | 7127257 | 1194797 | SH3-domain binding protein 2                                  | Sh3bp2 | 305450 | 1,54 | down |
| 6218710 | 7127257 | 1194798 | SH3-domain binding protein 2                                  | Sh3bp2 | 305450 | 1,13 | up   |
| 6564505 | 7127257 | 1194821 | SH3-domain binding protein 2                                  | Sh3bp2 | 305450 | 1,07 | down |
| 5633353 | 7277783 | 1567420 | SH3-domain GRB2-like (endophilin) interacting protein 1       | Sgip1  | 313413 | 3,65 | down |
| 5762455 | 7276762 | 1564510 | SH3-domain GRB2-like 2                                        | Sh3gl2 | 116743 | 2,07 | up   |
| 6027390 | 7276762 | 1564505 | SH3-domain GRB2-like 2                                        | Sh3gl2 | 116743 | 1,05 | up   |
| 6156254 | 7276762 | 1564509 | SH3-domain GRB2-like 2                                        | Sh3gl2 | 116743 | 1,03 | down |
| 6702229 | 7276762 | 1564507 | SH3-domain GRB2-like 2                                        | Sh3gl2 | 116743 | 1,02 | down |
| 6710873 | 7276762 | 1564511 | SH3-domain GRB2-like 2                                        | Sh3gl2 | 116743 | 2,00 | down |
| 6726019 | 7276762 | 1564504 | SH3-domain GRB2-like 2                                        | Sh3gl2 | 116743 | 1,46 | up   |
| 5712938 | 7244288 | 1484135 | SHC (Src homology 2 domain containing) family, member 4       | Shc4   | 679845 | 1,64 | down |
| 6547323 | 7244288 | 1484135 | SHC (Src homology 2 domain containing) family, member 4       | Shc4   | 679845 | 1,68 | down |
| 5630404 | 7312627 | 1653487 | SHC (Src homology 2 domain containing) transforming protein 2 | Shc2   | 314612 | 2,09 | up   |
| 5781665 | 7312627 | 1653472 | SHC (Src homology 2 domain containing) transforming protein 2 | Shc2   | 314612 | 1,04 | up   |
| 5800344 | 7312627 | 1653491 | SHC (Src homology 2 domain containing) transforming protein 2 | Shc2   | 314612 | 2,25 | up   |
| 5846223 | 7312627 | 1653472 | SHC (Src homology 2 domain containing) transforming protein 2 | Shc2   | 314612 | 1,03 | down |
| 5872599 | 7312627 | 1653481 | SHC (Src homology 2 domain containing) transforming protein 2 | Shc2   | 314612 | 1,32 | down |
| 5980003 | 7312627 | 1653482 | SHC (Src homology 2 domain containing) transforming protein 2 | Shc2   | 314612 | 1,42 | up   |
| 6125565 | 7312627 | 1653492 | SHC (Src homology 2 domain containing) transforming protein 2 | Shc2   | 314612 | 1,32 | down |
| 6140747 | 7312627 | 1653487 | SHC (Src homology 2 domain containing) transforming protein 2 | Shc2   | 314612 | 1,32 | down |
| 6147674 | 7312627 | 1653479 | SHC (Src homology 2 domain containing) transforming protein 2 | Shc2   | 314612 | 1,18 | up   |
| 6188203 | 7312627 | 1653484 | SHC (Src homology 2 domain containing) transforming protein 2 | Shc2   | 314612 | 1,11 | up   |
| 6207432 | 7312627 | 1653472 | SHC (Src homology 2 domain containing) transforming protein 2 | Shc2   | 314612 | 1,03 | down |
| 6361030 | 7312627 | 1653483 | SHC (Src homology 2 domain containing) transforming protein 2 | Shc2   | 314612 | 1,01 | down |
| 6602457 | 7312627 | 1653476 | SHC (Src homology 2 domain containing) transforming protein 2 | Shc2   | 314612 | 1,07 | down |
| 6615200 | 7312627 | 1653478 | SHC (Src homology 2 domain containing) transforming protein 2 | Shc2   | 314612 | 1,10 | up   |
| 6671458 | 7312627 | 1653477 | SHC (Src homology 2 domain containing) transforming protein 2 | Shc2   | 314612 | 1,05 | down |
| 6714209 | 7312627 | 1653480 | SHC (Src homology 2 domain containing) transforming protein 2 | Shc2   | 314612 | 1,85 | down |
| 5650238 | 7155882 | 1265383 | SHC (Src homology 2 domain containing) transforming protein 3 | Shc3   | 114858 | 1,18 | down |
| 5795918 | 7155882 | 1265361 | SHC (Src homology 2 domain containing) transforming protein 3 | Shc3   | 114858 | 1,68 | up   |
| 5872695 | 7155882 | 1265379 | SHC (Src homology 2 domain containing) transforming protein 3 | Shc3   | 114858 | 1,37 | down |
| 5890880 | 7155882 | 1265382 | SHC (Src homology 2 domain containing) transforming protein 3 | Shc3   | 114858 | 1,18 | down |
| 5948920 | 7155882 | 1265378 | SHC (Src homology 2 domain containing) transforming protein 3 | Shc3   | 114858 | 1,08 | down |
| 6363190 | 7155882 | 1265374 | SHC (Src homology 2 domain containing) transforming protein 3 | Shc3   | 114858 | 1,09 | down |
| 6365710 | 7155882 | 1265361 | SHC (Src homology 2 domain containing) transforming protein 3 | Shc3   | 114858 | 2,03 | up   |
| 6401000 | 7155882 | 1265377 | SHC (Src homology 2 domain containing) transforming protein 3 | Shc3   | 114858 | 1,06 | down |
| 6518920 | 7155882 | 1265382 | SHC (Src homology 2 domain containing) transforming protein 3 | Shc3   | 114858 | 1,12 | down |
| 6544456 | 7155882 | 1265361 | SHC (Src homology 2 domain containing) transforming protein 3 | Shc3   | 114858 | 1,10 | up   |
| 6578493 | 7155882 | 1265371 | SHC (Src homology 2 domain containing) transforming protein 3 | Shc3   | 114858 | 1,04 | up   |
| 6582121 | 7155882 | 1265372 | SHC (Src homology 2 domain containing) transforming protein 3 | Shc3   | 114858 | 1,02 | up   |

|         |         |         |                                                               |       |        |      |      |
|---------|---------|---------|---------------------------------------------------------------|-------|--------|------|------|
| 6629014 | 7155882 | 1265375 | SHC (Src homology 2 domain containing) transforming protein 3 | Shc3  | 114858 | 1,24 | down |
| 6687642 | 7155882 | 1265361 | SHC (Src homology 2 domain containing) transforming protein 3 | Shc3  | 114858 | 1,17 | up   |
| 6697177 | 7155882 | 1265373 | SHC (Src homology 2 domain containing) transforming protein 3 | Shc3  | 114858 | 1,12 | down |
| 6732561 | 7155882 | 1265380 | SHC (Src homology 2 domain containing) transforming protein 3 | Shc3  | 114858 | 1,28 | down |
| 6742135 | 7155882 | 1265368 | SHC (Src homology 2 domain containing) transforming protein 3 | Shc3  | 114858 | 1,17 | down |
| 5685926 | 7088135 | 1098394 | SID1 transmembrane family, member 1                           | Sidt1 | 288109 | 1,16 | up   |
| 5691069 | 7088135 | 1098406 | SID1 transmembrane family, member 1                           | Sidt1 | 288109 | 1,06 | down |
| 5717720 | 7088135 | 1098397 | SID1 transmembrane family, member 1                           | Sidt1 | 288109 | 1,17 | up   |
| 5735427 | 7088135 | 1098415 | SID1 transmembrane family, member 1                           | Sidt1 | 288109 | 1,37 | up   |
| 5779151 | 7088135 | 1098409 | SID1 transmembrane family, member 1                           | Sidt1 | 288109 | 1,47 | up   |
| 5811696 | 7088135 | 1098416 | SID1 transmembrane family, member 1                           | Sidt1 | 288109 | 1,10 | down |
| 5825925 | 7088135 | 1098419 | SID1 transmembrane family, member 1                           | Sidt1 | 288109 | 2,29 | down |
| 5916520 | 7088135 | 1098384 | SID1 transmembrane family, member 1                           | Sidt1 | 288109 | 1,43 | down |
| 5948615 | 7088135 | 1098408 | SID1 transmembrane family, member 1                           | Sidt1 | 288109 | 1,52 | down |
| 6044978 | 7088135 | 1098391 | SID1 transmembrane family, member 1                           | Sidt1 | 288109 | 1,13 | down |
| 6046245 | 7088135 | 1098396 | SID1 transmembrane family, member 1                           | Sidt1 | 288109 | 1,24 | down |
| 6125115 | 7088135 | 1098410 | SID1 transmembrane family, member 1                           | Sidt1 | 288109 | 1,16 | up   |
| 6147959 | 7088135 | 1098413 | SID1 transmembrane family, member 1                           | Sidt1 | 288109 | 1,39 | up   |
| 6220259 | 7088135 | 1098411 | SID1 transmembrane family, member 1                           | Sidt1 | 288109 | 2,29 | up   |
| 6227817 | 7088135 | 1098417 | SID1 transmembrane family, member 1                           | Sidt1 | 288109 | 1,10 | up   |
| 6397598 | 7088135 | 1098407 | SID1 transmembrane family, member 1                           | Sidt1 | 288109 | 1,26 | down |
| 6412756 | 7088135 | 1098404 | SID1 transmembrane family, member 1                           | Sidt1 | 288109 | 1,03 | up   |
| 6427850 | 7088135 | 1098399 | SID1 transmembrane family, member 1                           | Sidt1 | 288109 | 1,14 | down |
| 6443855 | 7088135 | 1098392 | SID1 transmembrane family, member 1                           | Sidt1 | 288109 | 1,25 | up   |
| 6445376 | 7088135 | 1098414 | SID1 transmembrane family, member 1                           | Sidt1 | 288109 | 1,77 | up   |
| 6575206 | 7088135 | 1098395 | SID1 transmembrane family, member 1                           | Sidt1 | 288109 | 1,80 | up   |
| 6575211 | 7088135 | 1098398 | SID1 transmembrane family, member 1                           | Sidt1 | 288109 | 1,03 | down |
| 6709709 | 7088135 | 1098401 | SID1 transmembrane family, member 1                           | Sidt1 | 288109 | 1,68 | up   |
| 6741178 | 7088135 | 1098405 | SID1 transmembrane family, member 1                           | Sidt1 | 288109 | 1,43 | down |
| 5625151 | 7084193 | 1089055 | sidekick homolog 2 (chicken)                                  | Sdk2  | 360652 | 1,84 | down |
| 5627490 | 7084193 | 1089054 | sidekick homolog 2 (chicken)                                  | Sdk2  | 360652 | 1,21 | down |
| 5657980 | 7084193 | 1089056 | sidekick homolog 2 (chicken)                                  | Sdk2  | 360652 | 1,02 | up   |
| 5661719 | 7084193 | 1089068 | sidekick homolog 2 (chicken)                                  | Sdk2  | 360652 | 1,01 | up   |
| 5738867 | 7084193 | 1089061 | sidekick homolog 2 (chicken)                                  | Sdk2  | 360652 | 1,39 | up   |
| 5741430 | 7084193 | 1089104 | sidekick homolog 2 (chicken)                                  | Sdk2  | 360652 | 1,24 | up   |
| 5784001 | 7084193 | 1089155 | sidekick homolog 2 (chicken)                                  | Sdk2  | 360652 | 1,40 | down |
| 5787745 | 7084193 | 1089078 | sidekick homolog 2 (chicken)                                  | Sdk2  | 360652 | 1,74 | down |
| 5822362 | 7084193 | 1089101 | sidekick homolog 2 (chicken)                                  | Sdk2  | 360652 | 1,02 | up   |
| 5827723 | 7084193 | 1089087 | sidekick homolog 2 (chicken)                                  | Sdk2  | 360652 | 1,01 | down |
| 5833279 | 7084193 | 1089154 | sidekick homolog 2 (chicken)                                  | Sdk2  | 360652 | 1,49 | down |
| 5871972 | 7084193 | 1089049 | sidekick homolog 2 (chicken)                                  | Sdk2  | 360652 | 1,34 | down |
| 5894330 | 7084193 | 1089113 | sidekick homolog 2 (chicken)                                  | Sdk2  | 360652 | 1,99 | down |
| 5895234 | 7084193 | 1089100 | sidekick homolog 2 (chicken)                                  | Sdk2  | 360652 | 1,32 | down |
| 5917109 | 7084193 | 1089103 | sidekick homolog 2 (chicken)                                  | Sdk2  | 360652 | 1,11 | down |
| 5980142 | 7084193 | 1089085 | sidekick homolog 2 (chicken)                                  | Sdk2  | 360652 | 1,11 | down |
| 6030525 | 7084193 | 1089092 | sidekick homolog 2 (chicken)                                  | Sdk2  | 360652 | 1,28 | up   |
| 6044701 | 7084193 | 1089074 | sidekick homolog 2 (chicken)                                  | Sdk2  | 360652 | 1,65 | up   |
| 6111846 | 7084193 | 1089091 | sidekick homolog 2 (chicken)                                  | Sdk2  | 360652 | 1,73 | down |
| 6116310 | 7084193 | 1089065 | sidekick homolog 2 (chicken)                                  | Sdk2  | 360652 | 1,04 | down |
| 6144137 | 7084193 | 1089083 | sidekick homolog 2 (chicken)                                  | Sdk2  | 360652 | 1,45 | up   |
| 6145942 | 7084193 | 1089126 | sidekick homolog 2 (chicken)                                  | Sdk2  | 360652 | 1,90 | down |
| 6153348 | 7084193 | 1089089 | sidekick homolog 2 (chicken)                                  | Sdk2  | 360652 | 1,10 | up   |
| 6164420 | 7084193 | 1089074 | sidekick homolog 2 (chicken)                                  | Sdk2  | 360652 | 1,44 | down |
| 6194957 | 7084193 | 1089069 | sidekick homolog 2 (chicken)                                  | Sdk2  | 360652 | 1,23 | down |
| 6229428 | 7084193 | 1089055 | sidekick homolog 2 (chicken)                                  | Sdk2  | 360652 | 1,16 | down |
| 6238698 | 7084193 | 1089082 | sidekick homolog 2 (chicken)                                  | Sdk2  | 360652 | 1,04 | up   |

|         |         |         |                                                    |       |        |      |      |
|---------|---------|---------|----------------------------------------------------|-------|--------|------|------|
| 6240056 | 7084193 | 1089097 | sidekick homolog 2 (chicken)                       | Sdk2  | 360652 | 1,70 | up   |
| 6267685 | 7084193 | 1089093 | sidekick homolog 2 (chicken)                       | Sdk2  | 360652 | 1,02 | up   |
| 6292806 | 7084193 | 1089064 | sidekick homolog 2 (chicken)                       | Sdk2  | 360652 | 1,22 | down |
| 6322618 | 7084193 | 1089079 | sidekick homolog 2 (chicken)                       | Sdk2  | 360652 | 1,04 | down |
| 6329613 | 7084193 | 1089080 | sidekick homolog 2 (chicken)                       | Sdk2  | 360652 | 1,16 | down |
| 6389832 | 7084193 | 1089094 | sidekick homolog 2 (chicken)                       | Sdk2  | 360652 | 1,04 | down |
| 6427045 | 7084193 | 1089072 | sidekick homolog 2 (chicken)                       | Sdk2  | 360652 | 1,40 | up   |
| 6429762 | 7084193 | 1089117 | sidekick homolog 2 (chicken)                       | Sdk2  | 360652 | 2,57 | down |
| 6474889 | 7084193 | 1089073 | sidekick homolog 2 (chicken)                       | Sdk2  | 360652 | 1,34 | down |
| 6486987 | 7084193 | 1089086 | sidekick homolog 2 (chicken)                       | Sdk2  | 360652 | 1,16 | up   |
| 6500099 | 7084193 | 1089075 | sidekick homolog 2 (chicken)                       | Sdk2  | 360652 | 1,13 | up   |
| 6535760 | 7084193 | 1089090 | sidekick homolog 2 (chicken)                       | Sdk2  | 360652 | 1,65 | down |
| 6536011 | 7084193 | 1089102 | sidekick homolog 2 (chicken)                       | Sdk2  | 360652 | 1,61 | down |
| 6541625 | 7084193 | 1089076 | sidekick homolog 2 (chicken)                       | Sdk2  | 360652 | 1,54 | up   |
| 6569975 | 7084193 | 1089066 | sidekick homolog 2 (chicken)                       | Sdk2  | 360652 | 1,23 | down |
| 6615980 | 7084193 | 1089108 | sidekick homolog 2 (chicken)                       | Sdk2  | 360652 | 1,35 | up   |
| 6617478 | 7084193 | 1089049 | sidekick homolog 2 (chicken)                       | Sdk2  | 360652 | 1,40 | up   |
| 6661862 | 7084193 | 1089071 | sidekick homolog 2 (chicken)                       | Sdk2  | 360652 | 1,46 | down |
| 6664861 | 7084193 | 1089098 | sidekick homolog 2 (chicken)                       | Sdk2  | 360652 | 1,12 | down |
| 6741188 | 7084193 | 1089098 | sidekick homolog 2 (chicken)                       | Sdk2  | 360652 | 1,66 | up   |
| 6743549 | 7084193 | 1089084 | sidekick homolog 2 (chicken)                       | Sdk2  | 360652 | 1,58 | down |
| 6168779 | 7102976 | 1135044 | signal peptide peptidase 3                         | Spp13 | 360822 | 1,07 | down |
| 5645847 | 7156763 | 1267746 | signal sequence receptor, alpha                    | Ssr1  | 361233 | 1,26 | up   |
| 5704974 | 7156763 | 1267748 | signal sequence receptor, alpha                    | Ssr1  | 361233 | 1,14 | up   |
| 5720643 | 7156763 | 1267747 | signal sequence receptor, alpha                    | Ssr1  | 361233 | 1,31 | up   |
| 5848546 | 7156763 | 1267753 | signal sequence receptor, alpha                    | Ssr1  | 361233 | 1,16 | down |
| 6130612 | 7156763 | 1267750 | signal sequence receptor, alpha                    | Ssr1  | 361233 | 1,00 | down |
| 6250430 | 7156763 | 1267752 | signal sequence receptor, alpha                    | Ssr1  | 361233 | 1,05 | up   |
| 6290559 | 7156763 | 1267749 | signal sequence receptor, alpha                    | Ssr1  | 361233 | 1,12 | up   |
| 6726397 | 7156763 | 1267751 | signal sequence receptor, alpha                    | Ssr1  | 361233 | 1,03 | down |
| 5643283 | 7311784 | 1651686 | signal transducer and activator of transcription 2 | Stat2 | 288774 | 1,23 | down |
| 5677859 | 7311784 | 1651670 | signal transducer and activator of transcription 2 | Stat2 | 288774 | 1,14 | down |
| 5764603 | 7311784 | 1651687 | signal transducer and activator of transcription 2 | Stat2 | 288774 | 1,06 | up   |
| 5847482 | 7311784 | 1651683 | signal transducer and activator of transcription 2 | Stat2 | 288774 | 1,12 | up   |
| 5881934 | 7311784 | 1651674 | signal transducer and activator of transcription 2 | Stat2 | 288774 | 1,05 | up   |
| 5912161 | 7311784 | 1651672 | signal transducer and activator of transcription 2 | Stat2 | 288774 | 1,06 | up   |
| 5919286 | 7311784 | 1651682 | signal transducer and activator of transcription 2 | Stat2 | 288774 | 1,24 | up   |
| 6061091 | 7311784 | 1651675 | signal transducer and activator of transcription 2 | Stat2 | 288774 | 1,16 | up   |
| 6065734 | 7311784 | 1651668 | signal transducer and activator of transcription 2 | Stat2 | 288774 | 3,94 | down |
| 6072783 | 7311784 | 1651664 | signal transducer and activator of transcription 2 | Stat2 | 288774 | 1,11 | up   |
| 6075010 | 7311784 | 1651679 | signal transducer and activator of transcription 2 | Stat2 | 288774 | 1,10 | up   |
| 6077938 | 7311784 | 1651680 | signal transducer and activator of transcription 2 | Stat2 | 288774 | 1,34 | up   |
| 6106429 | 7311784 | 1651678 | signal transducer and activator of transcription 2 | Stat2 | 288774 | 1,12 | up   |
| 6137926 | 7311784 | 1651665 | signal transducer and activator of transcription 2 | Stat2 | 288774 | 1,15 | up   |
| 6204435 | 7311784 | 1651669 | signal transducer and activator of transcription 2 | Stat2 | 288774 | 1,97 | up   |
| 6273787 | 7311784 | 1651673 | signal transducer and activator of transcription 2 | Stat2 | 288774 | 1,20 | down |
| 6371930 | 7311784 | 1651676 | signal transducer and activator of transcription 2 | Stat2 | 288774 | 1,83 | down |
| 6414474 | 7311784 | 1651681 | signal transducer and activator of transcription 2 | Stat2 | 288774 | 1,03 | down |
| 6427593 | 7311784 | 1651677 | signal transducer and activator of transcription 2 | Stat2 | 288774 | 1,30 | up   |
| 6450110 | 7311784 | 1651667 | signal transducer and activator of transcription 2 | Stat2 | 288774 | 1,38 | up   |
| 6473479 | 7311784 | 1651685 | signal transducer and activator of transcription 2 | Stat2 | 288774 | 1,57 | down |
| 6549303 | 7311784 | 1651671 | signal transducer and activator of transcription 2 | Stat2 | 288774 | 1,15 | down |
| 6568266 | 7311784 | 1651666 | signal transducer and activator of transcription 2 | Stat2 | 288774 | 1,49 | up   |
| 6745539 | 7311784 | 1651684 | signal transducer and activator of transcription 2 | Stat2 | 288774 | 1,49 | down |
| 5658612 | 7082775 | 1085645 | signal transducer and activator of transcription 3 | Stat3 | 25125  | 1,19 | down |
| 5697002 | 7082775 | 1085642 | signal transducer and activator of transcription 3 | Stat3 | 25125  | 1,25 | down |

|         |         |         |                                                                   |         |        |      |      |
|---------|---------|---------|-------------------------------------------------------------------|---------|--------|------|------|
| 5818860 | 7082775 | 1085641 | signal transducer and activator of transcription 3                | Stat3   | 25125  | 1,22 | up   |
| 5845715 | 7082775 | 1085649 | signal transducer and activator of transcription 3                | Stat3   | 25125  | 1,01 | up   |
| 5862208 | 7082775 | 1085631 | signal transducer and activator of transcription 3                | Stat3   | 25125  | 1,09 | up   |
| 5895490 | 7082775 | 1085635 | signal transducer and activator of transcription 3                | Stat3   | 25125  | 1,11 | down |
| 5965620 | 7082775 | 1085651 | signal transducer and activator of transcription 3                | Stat3   | 25125  | 2,28 | up   |
| 6004312 | 7082775 | 1085637 | signal transducer and activator of transcription 3                | Stat3   | 25125  | 1,06 | down |
| 6057185 | 7082775 | 1085654 | signal transducer and activator of transcription 3                | Stat3   | 25125  | 1,48 | up   |
| 6072088 | 7082775 | 1085638 | signal transducer and activator of transcription 3                | Stat3   | 25125  | 1,08 | down |
| 6095813 | 7082775 | 1085639 | signal transducer and activator of transcription 3                | Stat3   | 25125  | 1,08 | down |
| 6120614 | 7082775 | 1085647 | signal transducer and activator of transcription 3                | Stat3   | 25125  | 1,05 | up   |
| 6151646 | 7082775 | 1085633 | signal transducer and activator of transcription 3                | Stat3   | 25125  | 1,02 | up   |
| 6299125 | 7082775 | 1085633 | signal transducer and activator of transcription 3                | Stat3   | 25125  | 1,04 | down |
| 6445188 | 7082775 | 1085632 | signal transducer and activator of transcription 3                | Stat3   | 25125  | 1,06 | up   |
| 6474533 | 7082775 | 1085648 | signal transducer and activator of transcription 3                | Stat3   | 25125  | 1,15 | up   |
| 6499876 | 7082775 | 1085640 | signal transducer and activator of transcription 3                | Stat3   | 25125  | 1,01 | down |
| 6560310 | 7082775 | 1085652 | signal transducer and activator of transcription 3                | Stat3   | 25125  | 1,22 | up   |
| 6566097 | 7082775 | 1085636 | signal transducer and activator of transcription 3                | Stat3   | 25125  | 1,01 | down |
| 6577375 | 7082775 | 1085634 | signal transducer and activator of transcription 3                | Stat3   | 25125  | 1,27 | down |
| 6628532 | 7082775 | 1085653 | signal transducer and activator of transcription 3                | Stat3   | 25125  | 1,03 | up   |
| 6642802 | 7082775 | 1085644 | signal transducer and activator of transcription 3                | Stat3   | 25125  | 1,02 | down |
| 6699796 | 7082775 | 1085650 | signal transducer and activator of transcription 3                | Stat3   | 25125  | 1,07 | up   |
| 6704922 | 7082775 | 1085643 | signal transducer and activator of transcription 3                | Stat3   | 25125  | 1,03 | down |
| 6730579 | 7082775 | 1085646 | signal transducer and activator of transcription 3                | Stat3   | 25125  | 1,16 | down |
| 5653662 | 7368006 | 1789345 | signal transducing adaptor family member 2                        | Stap2   | 363334 | 1,16 | up   |
| 5706069 | 7368006 | 1789356 | signal transducing adaptor family member 2                        | Stap2   | 363334 | 2,30 | up   |
| 5711130 | 7368006 | 1789359 | signal transducing adaptor family member 2                        | Stap2   | 363334 | 1,03 | up   |
| 5868937 | 7368006 | 1789350 | signal transducing adaptor family member 2                        | Stap2   | 363334 | 1,46 | up   |
| 5869071 | 7368006 | 1789356 | signal transducing adaptor family member 2                        | Stap2   | 363334 | 1,30 | down |
| 5926534 | 7368006 | 1789359 | signal transducing adaptor family member 2                        | Stap2   | 363334 | 1,39 | down |
| 5970204 | 7368006 | 1789354 | signal transducing adaptor family member 2                        | Stap2   | 363334 | 2,87 | up   |
| 6009550 | 7368006 | 1789358 | signal transducing adaptor family member 2                        | Stap2   | 363334 | 1,01 | up   |
| 6017039 | 7368006 | 1789351 | signal transducing adaptor family member 2                        | Stap2   | 363334 | 1,21 | down |
| 6510023 | 7368006 | 1789356 | signal transducing adaptor family member 2                        | Stap2   | 363334 | 1,50 | down |
| 6545702 | 7368006 | 1789350 | signal transducing adaptor family member 2                        | Stap2   | 363334 | 1,00 | down |
| 6626383 | 7368006 | 1789348 | signal transducing adaptor family member 2                        | Stap2   | 363334 | 1,32 | up   |
| 6670458 | 7368006 | 1789349 | signal transducing adaptor family member 2                        | Stap2   | 363334 | 1,06 | down |
| 5633646 | 7160402 | 1276144 | signal transducing adaptor molecule (SH3 domain and ITAM motif) 1 | Stam    | 498798 | 1,05 | down |
| 5638115 | 7160402 | 1276151 | signal transducing adaptor molecule (SH3 domain and ITAM motif) 1 | Stam    | 498798 | 1,06 | up   |
| 5678448 | 7160402 | 1276150 | signal transducing adaptor molecule (SH3 domain and ITAM motif) 1 | Stam    | 498798 | 1,31 | up   |
| 5709698 | 7160402 | 1276148 | signal transducing adaptor molecule (SH3 domain and ITAM motif) 1 | Stam    | 498798 | 1,29 | up   |
| 5723768 | 7160402 | 1276154 | signal transducing adaptor molecule (SH3 domain and ITAM motif) 1 | Stam    | 498798 | 1,18 | down |
| 5843867 | 7160402 | 1276155 | signal transducing adaptor molecule (SH3 domain and ITAM motif) 1 | Stam    | 498798 | 1,41 | up   |
| 5900658 | 7160402 | 1276159 | signal transducing adaptor molecule (SH3 domain and ITAM motif) 1 | Stam    | 498798 | 1,04 | down |
| 6222690 | 7160402 | 1276149 | signal transducing adaptor molecule (SH3 domain and ITAM motif) 1 | Stam    | 498798 | 1,17 | down |
| 6319376 | 7160402 | 1276153 | signal transducing adaptor molecule (SH3 domain and ITAM motif) 1 | Stam    | 498798 | 1,03 | up   |
| 6392624 | 7160402 | 1276141 | signal transducing adaptor molecule (SH3 domain and ITAM motif) 1 | Stam    | 498798 | 1,03 | down |
| 6417992 | 7160402 | 1276146 | signal transducing adaptor molecule (SH3 domain and ITAM motif) 1 | Stam    | 498798 | 1,02 | up   |
| 6436549 | 7160402 | 1276147 | signal transducing adaptor molecule (SH3 domain and ITAM motif) 1 | Stam    | 498798 | 1,05 | up   |
| 6584463 | 7160402 | 1276152 | signal transducing adaptor molecule (SH3 domain and ITAM motif) 1 | Stam    | 498798 | 1,09 | down |
| 6619413 | 7160402 | 1276145 | signal transducing adaptor molecule (SH3 domain and ITAM motif) 1 | Stam    | 498798 | 1,07 | up   |
| 5623371 | 7186663 | 1341803 | signal-induced proliferation-associated 1 like 2                  | Sipa112 | 361442 | 1,32 | up   |
| 5754509 | 7186663 | 1341804 | signal-induced proliferation-associated 1 like 2                  | Sipa112 | 361442 | 2,71 | up   |
| 5761172 | 7186663 | 1341812 | signal-induced proliferation-associated 1 like 2                  | Sipa112 | 361442 | 1,69 | up   |
| 5777120 | 7186663 | 1341793 | signal-induced proliferation-associated 1 like 2                  | Sipa112 | 361442 | 1,13 | up   |
| 5804046 | 7186663 | 1341806 | signal-induced proliferation-associated 1 like 2                  | Sipa112 | 361442 | 1,24 | up   |
| 5808691 | 7186663 | 1341807 | signal-induced proliferation-associated 1 like 2                  | Sipa112 | 361442 | 1,61 | up   |

|         |         |         |                                                             |            |        |      |      |
|---------|---------|---------|-------------------------------------------------------------|------------|--------|------|------|
| 5816098 | 7186663 | 1341791 | signal-induced proliferation-associated 1 like 2            | Sipa112    | 361442 | 1,73 | down |
| 5842503 | 7186663 | 1341789 | signal-induced proliferation-associated 1 like 2            | Sipa112    | 361442 | 1,06 | down |
| 5862121 | 7186663 | 1341797 | signal-induced proliferation-associated 1 like 2            | Sipa112    | 361442 | 1,13 | up   |
| 5905146 | 7186663 | 1341802 | signal-induced proliferation-associated 1 like 2            | Sipa112    | 361442 | 1,51 | down |
| 5985042 | 7186663 | 1341795 | signal-induced proliferation-associated 1 like 2            | Sipa112    | 361442 | 1,44 | down |
| 5987455 | 7186663 | 1341809 | signal-induced proliferation-associated 1 like 2            | Sipa112    | 361442 | 1,42 | up   |
| 5994233 | 7186663 | 1341810 | signal-induced proliferation-associated 1 like 2            | Sipa112    | 361442 | 1,03 | up   |
| 6065758 | 7186663 | 1341808 | signal-induced proliferation-associated 1 like 2            | Sipa112    | 361442 | 1,10 | down |
| 6082495 | 7186663 | 1341790 | signal-induced proliferation-associated 1 like 2            | Sipa112    | 361442 | 1,09 | up   |
| 6114605 | 7186663 | 1341794 | signal-induced proliferation-associated 1 like 2            | Sipa112    | 361442 | 1,20 | down |
| 6124110 | 7186663 | 1341800 | signal-induced proliferation-associated 1 like 2            | Sipa112    | 361442 | 1,18 | down |
| 6137110 | 7186663 | 1341801 | signal-induced proliferation-associated 1 like 2            | Sipa112    | 361442 | 1,12 | up   |
| 6151142 | 7186663 | 1341789 | signal-induced proliferation-associated 1 like 2            | Sipa112    | 361442 | 1,12 | up   |
| 6163759 | 7186663 | 1341792 | signal-induced proliferation-associated 1 like 2            | Sipa112    | 361442 | 1,30 | up   |
| 6212575 | 7186663 | 1341796 | signal-induced proliferation-associated 1 like 2            | Sipa112    | 361442 | 1,02 | up   |
| 6267487 | 7186663 | 1341797 | signal-induced proliferation-associated 1 like 2            | Sipa112    | 361442 | 1,23 | down |
| 6317876 | 7186663 | 1341811 | signal-induced proliferation-associated 1 like 2            | Sipa112    | 361442 | 1,15 | down |
| 6403761 | 7186663 | 1341804 | signal-induced proliferation-associated 1 like 2            | Sipa112    | 361442 | 1,17 | down |
| 6408155 | 7186663 | 1341795 | signal-induced proliferation-associated 1 like 2            | Sipa112    | 361442 | 1,67 | up   |
| 6426108 | 7186663 | 1341801 | signal-induced proliferation-associated 1 like 2            | Sipa112    | 361442 | 1,33 | down |
| 6518650 | 7186663 | 1341798 | signal-induced proliferation-associated 1 like 2            | Sipa112    | 361442 | 1,02 | up   |
| 6546367 | 7186663 | 1341799 | signal-induced proliferation-associated 1 like 2            | Sipa112    | 361442 | 1,11 | down |
| 6696731 | 7186663 | 1341810 | signal-induced proliferation-associated 1 like 2            | Sipa112    | 361442 | 1,49 | up   |
| 6705556 | 7186663 | 1341805 | signal-induced proliferation-associated 1 like 2            | Sipa112    | 361442 | 1,22 | down |
| 5624574 | 7341546 | 1723958 | similar to 106 kDa O-GlcNAc transferase-interacting protein | RGD1307844 | 316085 | 1,04 | up   |
| 5625930 | 7341546 | 1723958 | similar to 106 kDa O-GlcNAc transferase-interacting protein | RGD1307844 | 316085 | 1,21 | up   |
| 5668215 | 7341546 | 1723979 | similar to 106 kDa O-GlcNAc transferase-interacting protein | RGD1307844 | 316085 | 1,43 | down |
| 5739300 | 7341546 | 1723973 | similar to 106 kDa O-GlcNAc transferase-interacting protein | RGD1307844 | 316085 | 1,24 | up   |
| 5740117 | 7341546 | 1723977 | similar to 106 kDa O-GlcNAc transferase-interacting protein | RGD1307844 | 316085 | 1,15 | up   |
| 5840928 | 7341546 | 1723978 | similar to 106 kDa O-GlcNAc transferase-interacting protein | RGD1307844 | 316085 | 1,17 | down |
| 5844348 | 7341546 | 1723963 | similar to 106 kDa O-GlcNAc transferase-interacting protein | RGD1307844 | 316085 | 1,05 | up   |
| 5907578 | 7341546 | 1723965 | similar to 106 kDa O-GlcNAc transferase-interacting protein | RGD1307844 | 316085 | 1,14 | up   |
| 5940304 | 7341546 | 1723978 | similar to 106 kDa O-GlcNAc transferase-interacting protein | RGD1307844 | 316085 | 1,17 | up   |
| 5966991 | 7341546 | 1723968 | similar to 106 kDa O-GlcNAc transferase-interacting protein | RGD1307844 | 316085 | 1,12 | up   |
| 6106338 | 7341546 | 1723961 | similar to 106 kDa O-GlcNAc transferase-interacting protein | RGD1307844 | 316085 | 1,26 | down |
| 6162686 | 7341546 | 1723972 | similar to 106 kDa O-GlcNAc transferase-interacting protein | RGD1307844 | 316085 | 1,20 | up   |
| 6166034 | 7341546 | 1723964 | similar to 106 kDa O-GlcNAc transferase-interacting protein | RGD1307844 | 316085 | 1,05 | up   |
| 6217319 | 7341546 | 1723971 | similar to 106 kDa O-GlcNAc transferase-interacting protein | RGD1307844 | 316085 | 1,11 | up   |
| 6225195 | 7341546 | 1723978 | similar to 106 kDa O-GlcNAc transferase-interacting protein | RGD1307844 | 316085 | 1,41 | down |
| 6225824 | 7341546 | 1723975 | similar to 106 kDa O-GlcNAc transferase-interacting protein | RGD1307844 | 316085 | 1,09 | down |
| 6249227 | 7341546 | 1723979 | similar to 106 kDa O-GlcNAc transferase-interacting protein | RGD1307844 | 316085 | 1,12 | down |
| 6343272 | 7341546 | 1723979 | similar to 106 kDa O-GlcNAc transferase-interacting protein | RGD1307844 | 316085 | 1,28 | up   |
| 6503878 | 7341546 | 1723979 | similar to 106 kDa O-GlcNAc transferase-interacting protein | RGD1307844 | 316085 | 1,08 | down |
| 6507339 | 7341546 | 1723969 | similar to 106 kDa O-GlcNAc transferase-interacting protein | RGD1307844 | 316085 | 1,20 | up   |
| 6526013 | 7341546 | 1723947 | similar to 106 kDa O-GlcNAc transferase-interacting protein | RGD1307844 | 316085 | 1,15 | up   |
| 6619372 | 7341546 | 1723979 | similar to 106 kDa O-GlcNAc transferase-interacting protein | RGD1307844 | 316085 | 1,17 | down |
| 6723106 | 7341546 | 1723967 | similar to 106 kDa O-GlcNAc transferase-interacting protein | RGD1307844 | 316085 | 1,20 | up   |
| 5679235 | 7139708 | 1225051 | similar to 2610301G19Rik protein                            | RGD1309922 | 306007 | 1,09 | down |
| 5714098 | 7139708 | 1225051 | similar to 2610301G19Rik protein                            | RGD1309922 | 306007 | 1,20 | up   |
| 6045016 | 7139708 | 1225051 | similar to 2610301G19Rik protein                            | RGD1309922 | 306007 | 1,15 | down |
| 6160902 | 7139708 | 1225051 | similar to 2610301G19Rik protein                            | RGD1309922 | 306007 | 1,30 | up   |
| 6269327 | 7139708 | 1225051 | similar to 2610301G19Rik protein                            | RGD1309922 | 306007 | 2,16 | down |
| 6371277 | 7139708 | 1225053 | similar to 2610301G19Rik protein                            | RGD1309922 | 306007 | 1,05 | down |
| 6455454 | 7139708 | 1225051 | similar to 2610301G19Rik protein                            | RGD1309922 | 306007 | 1,12 | down |
| 6506578 | 7139708 | 1225051 | similar to 2610301G19Rik protein                            | RGD1309922 | 306007 | 1,12 | down |
| 5680597 | 7273881 | 1557310 | similar to 35 kDa SR repressor protein (SRrp35)             | RGD1561162 | 297962 | 1,20 | up   |

|         |         |         |                                                                                   |            |        |      |      |
|---------|---------|---------|-----------------------------------------------------------------------------------|------------|--------|------|------|
| 5851262 | 7273881 | 1557308 | similar to 35 kDa SR repressor protein (SRrp35)                                   | RGD1561162 | 297962 | 1,30 | up   |
| 5892928 | 7273881 | 1557306 | similar to 35 kDa SR repressor protein (SRrp35)                                   | RGD1561162 | 297962 | 1,13 | down |
| 5961994 | 7273881 | 1557310 | similar to 35 kDa SR repressor protein (SRrp35)                                   | RGD1561162 | 297962 | 1,55 | up   |
| 6030884 | 7273881 | 1557312 | similar to 35 kDa SR repressor protein (SRrp35)                                   | RGD1561162 | 297962 | 2,04 | down |
| 6474419 | 7273881 | 1557311 | similar to 35 kDa SR repressor protein (SRrp35)                                   | RGD1561162 | 297962 | 1,28 | down |
| 6484552 | 7273881 | 1557313 | similar to 35 kDa SR repressor protein (SRrp35)                                   | RGD1561162 | 297962 | 1,04 | down |
| 6678810 | 7273881 | 1557312 | similar to 35 kDa SR repressor protein (SRrp35)                                   | RGD1561162 | 297962 | 1,12 | up   |
| 5702184 | 7350837 | 1746973 | similar to 3-ketoacyl-CoA thiolase B, peroxisomal precursor (Beta-ketothiolase B) | RGD1562373 | 501072 | 1,16 | down |
| 5831939 | 7350837 | 1746975 | similar to 3-ketoacyl-CoA thiolase B, peroxisomal precursor (Beta-ketothiolase B) | RGD1562373 | 501072 | 1,04 | up   |
| 5984833 | 7350837 | 1746971 | similar to 3-ketoacyl-CoA thiolase B, peroxisomal precursor (Beta-ketothiolase B) | RGD1562373 | 501072 | 1,08 | up   |
| 6002164 | 7350837 | 1746981 | similar to 3-ketoacyl-CoA thiolase B, peroxisomal precursor (Beta-ketothiolase B) | RGD1562373 | 501072 | 1,27 | up   |
| 6103450 | 7350837 | 1746974 | similar to 3-ketoacyl-CoA thiolase B, peroxisomal precursor (Beta-ketothiolase B) | RGD1562373 | 501072 | 1,20 | down |
| 6156704 | 7350837 | 1746977 | similar to 3-ketoacyl-CoA thiolase B, peroxisomal precursor (Beta-ketothiolase B) | RGD1562373 | 501072 | 1,20 | down |
| 6174563 | 7350837 | 1746976 | similar to 3-ketoacyl-CoA thiolase B, peroxisomal precursor (Beta-ketothiolase B) | RGD1562373 | 501072 | 1,31 | up   |
| 6246125 | 7350837 | 1746972 | similar to 3-ketoacyl-CoA thiolase B, peroxisomal precursor (Beta-ketothiolase B) | RGD1562373 | 501072 | 2,68 | down |
| 6329594 | 7350837 | 1746969 | similar to 3-ketoacyl-CoA thiolase B, peroxisomal precursor (Beta-ketothiolase B) | RGD1562373 | 501072 | 1,15 | down |
| 6378487 | 7350837 | 1746980 | similar to 3-ketoacyl-CoA thiolase B, peroxisomal precursor (Beta-ketothiolase B) | RGD1562373 | 501072 | 1,71 | up   |
| 6427122 | 7350837 | 1746970 | similar to 3-ketoacyl-CoA thiolase B, peroxisomal precursor (Beta-ketothiolase B) | RGD1562373 | 501072 | 1,09 | down |
| 6477183 | 7350837 | 1746979 | similar to 3-ketoacyl-CoA thiolase B, peroxisomal precursor (Beta-ketothiolase B) | RGD1562373 | 501072 | 1,14 | down |
| 6602105 | 7350837 | 1746978 | similar to 3-ketoacyl-CoA thiolase B, peroxisomal precursor (Beta-ketothiolase B) | RGD1562373 | 501072 | 1,41 | up   |
| 5687196 | 7374315 | 1807391 | similar to 4930453N24Rik protein                                                  | MGC95208   | 304176 | 1,46 | up   |
| 6117421 | 7374315 | 1807391 | similar to 4930453N24Rik protein                                                  | MGC95208   | 304176 | 1,18 | down |
| 6459674 | 7374315 | 1807392 | similar to 4930453N24Rik protein                                                  | MGC95208   | 304176 | 2,33 | up   |
| 6583941 | 7374315 | 1807391 | similar to 4930453N24Rik protein                                                  | MGC95208   | 304176 | 1,22 | down |
| 5691314 | 7064224 | 1041787 | similar to 4930506M07Rik protein                                                  | RGD1311558 | 292139 | 1,29 | down |
| 5744776 | 7064224 | 1041784 | similar to 4930506M07Rik protein                                                  | RGD1311558 | 292139 | 1,03 | down |
| 5894972 | 7064224 | 1041801 | similar to 4930506M07Rik protein                                                  | RGD1311558 | 292139 | 1,34 | down |
| 5937875 | 7064224 | 1041775 | similar to 4930506M07Rik protein                                                  | RGD1311558 | 292139 | 1,17 | up   |
| 5946596 | 7064224 | 1041771 | similar to 4930506M07Rik protein                                                  | RGD1311558 | 292139 | 1,29 | up   |
| 5974282 | 7064224 | 1041794 | similar to 4930506M07Rik protein                                                  | RGD1311558 | 292139 | 2,39 | down |
| 5986076 | 7064224 | 1041789 | similar to 4930506M07Rik protein                                                  | RGD1311558 | 292139 | 1,24 | up   |
| 5989916 | 7064224 | 1041778 | similar to 4930506M07Rik protein                                                  | RGD1311558 | 292139 | 1,14 | up   |
| 6026502 | 7064224 | 1041805 | similar to 4930506M07Rik protein                                                  | RGD1311558 | 292139 | 1,58 | up   |
| 6138206 | 7064224 | 1041790 | similar to 4930506M07Rik protein                                                  | RGD1311558 | 292139 | 1,55 | up   |
| 6261390 | 7064224 | 1041777 | similar to 4930506M07Rik protein                                                  | RGD1311558 | 292139 | 1,21 | up   |
| 6264127 | 7064224 | 1041783 | similar to 4930506M07Rik protein                                                  | RGD1311558 | 292139 | 1,27 | up   |
| 6265400 | 7064224 | 1041771 | similar to 4930506M07Rik protein                                                  | RGD1311558 | 292139 | 1,04 | up   |
| 6367327 | 7064224 | 1041791 | similar to 4930506M07Rik protein                                                  | RGD1311558 | 292139 | 1,38 | down |
| 6449208 | 7064224 | 1041785 | similar to 4930506M07Rik protein                                                  | RGD1311558 | 292139 | 1,20 | up   |
| 6462105 | 7064224 | 1041782 | similar to 4930506M07Rik protein                                                  | RGD1311558 | 292139 | 1,02 | down |
| 6663499 | 7064224 | 1041786 | similar to 4930506M07Rik protein                                                  | RGD1311558 | 292139 | 1,24 | up   |
| 5737788 | 7031618 | 964198  | similar to 5E5 antigen                                                            | LOC691056  | 691056 | 1,39 | down |
| 5743827 | 7031618 | 964195  | similar to 5E5 antigen                                                            | LOC691056  | 691056 | 1,03 | up   |
| 5746762 | 7031618 | 964197  | similar to 5E5 antigen                                                            | LOC691056  | 691056 | 1,07 | down |
| 5889202 | 7031618 | 964196  | similar to 5E5 antigen                                                            | LOC691056  | 691056 | 1,01 | up   |
| 5908204 | 7031618 | 964197  | similar to 5E5 antigen                                                            | LOC691056  | 691056 | 1,08 | up   |
| 5989569 | 7031618 | 964189  | similar to 5E5 antigen                                                            | LOC691056  | 691056 | 1,91 | up   |
| 6067525 | 7031618 | 964190  | similar to 5E5 antigen                                                            | LOC691056  | 691056 | 1,02 | down |
| 6082314 | 7031618 | 964197  | similar to 5E5 antigen                                                            | LOC691056  | 691056 | 1,29 | up   |
| 6237579 | 7031618 | 964194  | similar to 5E5 antigen                                                            | LOC691056  | 691056 | 1,52 | down |
| 6352102 | 7031618 | 964188  | similar to 5E5 antigen                                                            | LOC691056  | 691056 | 1,31 | down |
| 6395869 | 7031618 | 964197  | similar to 5E5 antigen                                                            | LOC691056  | 691056 | 1,03 | up   |
| 6425508 | 7031618 | 964193  | similar to 5E5 antigen                                                            | LOC691056  | 691056 | 2,11 | down |
| 6468680 | 7031618 | 964191  | similar to 5E5 antigen                                                            | LOC691056  | 691056 | 1,89 | down |
| 6546934 | 7031618 | 964197  | similar to 5E5 antigen                                                            | LOC691056  | 691056 | 1,18 | down |
| 6663919 | 7031618 | 964191  | similar to 5E5 antigen                                                            | LOC691056  | 691056 | 1,11 | down |



|         |         |         |                                                                               |            |        |      |      |
|---------|---------|---------|-------------------------------------------------------------------------------|------------|--------|------|------|
| 6701149 | 7031618 | 964197  | similar to 5E5 antigen                                                        | LOC691056  | 691056 | 1,56 | up   |
| 6743332 | 7031618 | 964192  | similar to 5E5 antigen                                                        | LOC691056  | 691056 | 1,29 | down |
| 5645407 | 7055354 | 1021374 | similar to 9230105E10Rik protein                                              | RGD1304579 | 308906 | 1,05 | up   |
| 5649001 | 7055354 | 1021375 | similar to 9230105E10Rik protein                                              | RGD1304579 | 308906 | 1,64 | down |
| 5663984 | 7055354 | 1021371 | similar to 9230105E10Rik protein                                              | RGD1304579 | 308906 | 2,45 | down |
| 5942240 | 7055354 | 1021369 | similar to 9230105E10Rik protein                                              | RGD1304579 | 308906 | 1,01 | up   |
| 6125847 | 7055354 | 1021368 | similar to 9230105E10Rik protein                                              | RGD1304579 | 308906 | 1,19 | down |
| 6264249 | 7055354 | 1021370 | similar to 9230105E10Rik protein                                              | RGD1304579 | 308906 | 1,22 | up   |
| 6295813 | 7055354 | 1021373 | similar to 9230105E10Rik protein                                              | RGD1304579 | 308906 | 1,09 | up   |
| 6343048 | 7055354 | 1021372 | similar to 9230105E10Rik protein                                              | RGD1304579 | 308906 | 1,00 | up   |
| 6491563 | 7055354 | 1021374 | similar to 9230105E10Rik protein                                              | RGD1304579 | 308906 | 1,69 | up   |
| 6008769 | 7108345 | 1148086 | similar to 9630058J23Rik protein                                              | RGD1564833 | 498297 | 1,18 | up   |
| 6084452 | 7108345 | 1148063 | similar to 9630058J23Rik protein                                              | RGD1564833 | 498297 | 1,16 | up   |
| 6384910 | 7108345 | 1148086 | similar to 9630058J23Rik protein                                              | RGD1564833 | 498297 | 1,08 | down |
| 6537115 | 7108345 | 1148086 | similar to 9630058J23Rik protein                                              | RGD1564833 | 498297 | 1,59 | down |
| 5682104 | 7139709 | 1225070 | similar to 9930012K11Rik protein                                              | RGD1308117 | 361066 | 1,18 | up   |
| 5757868 | 7139709 | 1225071 | similar to 9930012K11Rik protein                                              | RGD1308117 | 361066 | 1,25 | down |
| 5858963 | 7139709 | 1225077 | similar to 9930012K11Rik protein                                              | RGD1308117 | 361066 | 1,00 | up   |
| 6021377 | 7139709 | 1225075 | similar to 9930012K11Rik protein                                              | RGD1308117 | 361066 | 1,39 | up   |
| 6022671 | 7139709 | 1225072 | similar to 9930012K11Rik protein                                              | RGD1308117 | 361066 | 1,35 | down |
| 6027641 | 7139709 | 1225075 | similar to 9930012K11Rik protein                                              | RGD1308117 | 361066 | 1,05 | up   |
| 6119734 | 7139709 | 1225074 | similar to 9930012K11Rik protein                                              | RGD1308117 | 361066 | 1,27 | up   |
| 6341116 | 7139709 | 1225075 | similar to 9930012K11Rik protein                                              | RGD1308117 | 361066 | 1,48 | down |
| 6348565 | 7139709 | 1225074 | similar to 9930012K11Rik protein                                              | RGD1308117 | 361066 | 1,05 | up   |
| 6546644 | 7139709 | 1225073 | similar to 9930012K11Rik protein                                              | RGD1308117 | 361066 | 2,33 | down |
| 6627789 | 7139709 | 1225070 | similar to 9930012K11Rik protein                                              | RGD1308117 | 361066 | 1,05 | up   |
| 6184448 | 7092549 | 1109117 | similar to ABI gene family, member 3 (NESH) binding protein                   | RGD1562717 | 363767 | 1,71 | up   |
| 6263162 | 7092549 | 1109117 | similar to ABI gene family, member 3 (NESH) binding protein                   | RGD1562717 | 363767 | 1,07 | down |
| 6687211 | 7092549 | 1109117 | similar to ABI gene family, member 3 (NESH) binding protein                   | RGD1562717 | 363767 | 1,01 | up   |
| 6701491 | 7092549 | 1109117 | similar to ABI gene family, member 3 (NESH) binding protein                   | RGD1562717 | 363767 | 2,02 | down |
| 5635317 | 7351333 | 1748159 | similar to Acyl-CoA dehydrogenase family member 8, mitochondrial precursor (A | LOC367196  | 367196 | 1,15 | down |
| 5702351 | 7351333 | 1748156 | similar to Acyl-CoA dehydrogenase family member 8, mitochondrial precursor (A | LOC367196  | 367196 | 2,54 | up   |
| 5947875 | 7351333 | 1748156 | similar to Acyl-CoA dehydrogenase family member 8, mitochondrial precursor (A | LOC367196  | 367196 | 1,25 | up   |
| 6115638 | 7351333 | 1748160 | similar to Acyl-CoA dehydrogenase family member 8, mitochondrial precursor (A | LOC367196  | 367196 | 1,35 | down |
| 6197210 | 7351333 | 1748158 | similar to Acyl-CoA dehydrogenase family member 8, mitochondrial precursor (A | LOC367196  | 367196 | 1,00 | down |
| 6400050 | 7351333 | 1748157 | similar to Acyl-CoA dehydrogenase family member 8, mitochondrial precursor (A | LOC367196  | 367196 | 1,13 | down |
| 6656863 | 7351333 | 1748158 | similar to Acyl-CoA dehydrogenase family member 8, mitochondrial precursor (A | LOC367196  | 367196 | 1,08 | down |
| 5664795 | 7039589 | 984515  | similar to AHNAK nucleoprotein isoform 2                                      | LOC686579  | 686579 | 1,25 | down |
| 5785836 | 7039589 | 984518  | similar to AHNAK nucleoprotein isoform 2                                      | LOC686579  | 686579 | 1,82 | down |
| 5974046 | 7039589 | 984521  | similar to AHNAK nucleoprotein isoform 2                                      | LOC686579  | 686579 | 1,23 | down |
| 6636321 | 7039589 | 984511  | similar to AHNAK nucleoprotein isoform 2                                      | LOC686579  | 686579 | 1,88 | up   |
| 5823584 | 7359453 | 1768453 | similar to AI661453 protein                                                   | RGD1561662 | 301232 | 1,02 | up   |
| 6060141 | 7359453 | 1768460 | similar to AI661453 protein                                                   | RGD1561662 | 301232 | 1,13 | up   |
| 6067316 | 7359453 | 1768449 | similar to AI661453 protein                                                   | RGD1561662 | 301232 | 1,20 | up   |
| 5648640 | 7343122 | 1727749 | similar to Anillin                                                            | RGD1561367 | 363031 | 1,70 | down |
| 6004763 | 7343122 | 1727750 | similar to Anillin                                                            | RGD1561367 | 363031 | 1,00 | up   |
| 5721715 | 7181442 | 1328887 | similar to ATM/ATR-Substrate Chk2-Interacting Zn2+-finger protein             | LOC499230  | 499230 | 1,06 | up   |
| 5746075 | 7299204 | 1619541 | similar to B0511.12                                                           | LOC690217  | 690217 | 1,15 | up   |
| 5862024 | 7299204 | 1619542 | similar to B0511.12                                                           | LOC690217  | 690217 | 1,52 | down |
| 5917638 | 7299204 | 1619548 | similar to B0511.12                                                           | LOC690217  | 690217 | 1,16 | up   |
| 6039911 | 7299204 | 1619543 | similar to B0511.12                                                           | LOC690217  | 690217 | 1,21 | up   |
| 6066410 | 7299204 | 1619548 | similar to B0511.12                                                           | LOC690217  | 690217 | 1,47 | down |
| 6153287 | 7299204 | 1619542 | similar to B0511.12                                                           | LOC690217  | 690217 | 1,23 | down |
| 6171257 | 7299204 | 1619542 | similar to B0511.12                                                           | LOC690217  | 690217 | 1,15 | down |
| 6198434 | 7299204 | 1619548 | similar to B0511.12                                                           | LOC690217  | 690217 | 1,05 | up   |
| 6229352 | 7299204 | 1619549 | similar to B0511.12                                                           | LOC690217  | 690217 | 1,54 | down |

|         |         |         |                                                                                |            |        |      |      |
|---------|---------|---------|--------------------------------------------------------------------------------|------------|--------|------|------|
| 6306453 | 7299204 | 1619550 | similar to B0511.12                                                            | LOC690217  | 690217 | 1,38 | up   |
| 6341048 | 7299204 | 1619546 | similar to B0511.12                                                            | LOC690217  | 690217 | 1,26 | up   |
| 6342015 | 7299204 | 1619548 | similar to B0511.12                                                            | LOC690217  | 690217 | 1,70 | up   |
| 6359559 | 7299204 | 1619550 | similar to B0511.12                                                            | LOC690217  | 690217 | 1,20 | up   |
| 6466766 | 7299204 | 1619544 | similar to B0511.12                                                            | LOC690217  | 690217 | 1,20 | up   |
| 6591363 | 7299204 | 1619545 | similar to B0511.12                                                            | LOC690217  | 690217 | 1,36 | up   |
| 5622660 | 7057615 | 1026108 | similar to BC039632 protein                                                    | RGD1566127 | 499270 | 1,05 | up   |
| 5832023 | 7057615 | 1026114 | similar to BC039632 protein                                                    | RGD1566127 | 499270 | 1,21 | up   |
| 5846147 | 7057615 | 1026108 | similar to BC039632 protein                                                    | RGD1566127 | 499270 | 1,48 | down |
| 5925857 | 7057615 | 1026109 | similar to BC039632 protein                                                    | RGD1566127 | 499270 | 1,44 | down |
| 6056203 | 7057615 | 1026111 | similar to BC039632 protein                                                    | RGD1566127 | 499270 | 1,16 | up   |
| 6107533 | 7057615 | 1026104 | similar to BC039632 protein                                                    | RGD1566127 | 499270 | 1,46 | down |
| 6312564 | 7057615 | 1026103 | similar to BC039632 protein                                                    | RGD1566127 | 499270 | 1,06 | down |
| 6376081 | 7057615 | 1026110 | similar to BC039632 protein                                                    | RGD1566127 | 499270 | 1,04 | down |
| 6399286 | 7057615 | 1026107 | similar to BC039632 protein                                                    | RGD1566127 | 499270 | 1,34 | up   |
| 6522191 | 7057615 | 1026111 | similar to BC039632 protein                                                    | RGD1566127 | 499270 | 1,10 | up   |
| 6527329 | 7057615 | 1026105 | similar to BC039632 protein                                                    | RGD1566127 | 499270 | 2,46 | down |
| 6650872 | 7057615 | 1026104 | similar to BC039632 protein                                                    | RGD1566127 | 499270 | 1,63 | down |
| 6728136 | 7057615 | 1026106 | similar to BC039632 protein                                                    | RGD1566127 | 499270 | 1,06 | down |
| 5727356 | 7144088 | 1236184 | similar to B-cell novel protein 1                                              | LOC498604  | 498604 | 1,20 | up   |
| 5771977 | 7144088 | 1236178 | similar to B-cell novel protein 1                                              | LOC498604  | 498604 | 2,38 | down |
| 5864640 | 7144088 | 1236186 | similar to B-cell novel protein 1                                              | LOC498604  | 498604 | 1,65 | down |
| 5912802 | 7144088 | 1236181 | similar to B-cell novel protein 1                                              | LOC498604  | 498604 | 1,36 | up   |
| 6042611 | 7144088 | 1236181 | similar to B-cell novel protein 1                                              | LOC498604  | 498604 | 1,04 | down |
| 6114467 | 7144088 | 1236182 | similar to B-cell novel protein 1                                              | LOC498604  | 498604 | 1,00 | up   |
| 6160110 | 7144088 | 1236188 | similar to B-cell novel protein 1                                              | LOC498604  | 498604 | 2,03 | down |
| 6291098 | 7144088 | 1236175 | similar to B-cell novel protein 1                                              | LOC498604  | 498604 | 1,54 | up   |
| 6298849 | 7144088 | 1236187 | similar to B-cell novel protein 1                                              | LOC498604  | 498604 | 1,07 | up   |
| 6307605 | 7144088 | 1236180 | similar to B-cell novel protein 1                                              | LOC498604  | 498604 | 1,46 | down |
| 6310851 | 7144088 | 1236183 | similar to B-cell novel protein 1                                              | LOC498604  | 498604 | 1,35 | down |
| 6349887 | 7144088 | 1236179 | similar to B-cell novel protein 1                                              | LOC498604  | 498604 | 1,29 | down |
| 6387452 | 7144088 | 1236190 | similar to B-cell novel protein 1                                              | LOC498604  | 498604 | 1,34 | up   |
| 6470044 | 7144088 | 1236189 | similar to B-cell novel protein 1                                              | LOC498604  | 498604 | 1,31 | down |
| 6573790 | 7144088 | 1236182 | similar to B-cell novel protein 1                                              | LOC498604  | 498604 | 1,16 | up   |
| 6577355 | 7144088 | 1236178 | similar to B-cell novel protein 1                                              | LOC498604  | 498604 | 1,13 | down |
| 6714625 | 7144088 | 1236176 | similar to B-cell novel protein 1                                              | LOC498604  | 498604 | 1,11 | up   |
| 5708208 | 7273744 | 1557040 | similar to BTB and CNC homology 1, basic leucine zipper transcription factor 2 | RGD1562865 | 313125 | 1,27 | up   |
| 6099593 | 7273744 | 1557040 | similar to BTB and CNC homology 1, basic leucine zipper transcription factor 2 | RGD1562865 | 313125 | 1,11 | up   |
| 6099667 | 7273744 | 1557040 | similar to BTB and CNC homology 1, basic leucine zipper transcription factor 2 | RGD1562865 | 313125 | 1,13 | down |
| 6110966 | 7273744 | 1557031 | similar to BTB and CNC homology 1, basic leucine zipper transcription factor 2 | RGD1562865 | 313125 | 1,26 | up   |
| 6156585 | 7273744 | 1557040 | similar to BTB and CNC homology 1, basic leucine zipper transcription factor 2 | RGD1562865 | 313125 | 1,29 | up   |
| 6211493 | 7273744 | 1557022 | similar to BTB and CNC homology 1, basic leucine zipper transcription factor 2 | RGD1562865 | 313125 | 1,12 | up   |
| 6302631 | 7273744 | 1557042 | similar to BTB and CNC homology 1, basic leucine zipper transcription factor 2 | RGD1562865 | 313125 | 1,35 | down |
| 6362028 | 7273744 | 1557040 | similar to BTB and CNC homology 1, basic leucine zipper transcription factor 2 | RGD1562865 | 313125 | 1,50 | up   |
| 6552576 | 7273744 | 1557043 | similar to BTB and CNC homology 1, basic leucine zipper transcription factor 2 | RGD1562865 | 313125 | 1,51 | down |
| 6587296 | 7273744 | 1556995 | similar to BTB and CNC homology 1, basic leucine zipper transcription factor 2 | RGD1562865 | 313125 | 1,13 | up   |
| 5622536 | 7217623 | 1417107 | similar to C21orf70 protein                                                    | RGD1311257 | 294333 | 1,41 | up   |
| 5796312 | 7217623 | 1417104 | similar to C21orf70 protein                                                    | RGD1311257 | 294333 | 1,06 | down |
| 6075670 | 7217623 | 1417106 | similar to C21orf70 protein                                                    | RGD1311257 | 294333 | 1,05 | down |
| 6217191 | 7217623 | 1417104 | similar to C21orf70 protein                                                    | RGD1311257 | 294333 | 2,50 | down |
| 6234120 | 7217623 | 1417109 | similar to C21orf70 protein                                                    | RGD1311257 | 294333 | 1,17 | up   |
| 6237480 | 7217623 | 1417108 | similar to C21orf70 protein                                                    | RGD1311257 | 294333 | 1,17 | up   |
| 6277102 | 7217623 | 1417110 | similar to C21orf70 protein                                                    | RGD1311257 | 294333 | 1,22 | down |
| 6498609 | 7217623 | 1417105 | similar to C21orf70 protein                                                    | RGD1311257 | 294333 | 1,59 | down |
| 5691295 | 7293402 | 1604702 | similar to calmodulin-binding transcription activator 1                        | LOC500591  | 500591 | 1,16 | down |
| 5693568 | 7293402 | 1604703 | similar to calmodulin-binding transcription activator 1                        | LOC500591  | 500591 | 1,24 | up   |

|         |         |         |                                                                                                                        |                                        |        |      |      |
|---------|---------|---------|------------------------------------------------------------------------------------------------------------------------|----------------------------------------|--------|------|------|
| 5709047 | 7293402 | 1604700 | similar to calmodulin-binding transcription activator 1                                                                | LOC500591                              | 500591 | 1,11 | down |
| 5759583 | 7293402 | 1604722 | similar to calmodulin-binding transcription activator 1                                                                | LOC500591                              | 500591 | 1,06 | down |
| 5787569 | 7293402 | 1604696 | similar to calmodulin-binding transcription activator 1                                                                | LOC500591                              | 500591 | 1,23 | down |
| 5822480 | 7293402 | 1604729 | similar to calmodulin-binding transcription activator 1                                                                | LOC500591                              | 500591 | 2,43 | down |
| 5863223 | 7293402 | 1604722 | similar to calmodulin-binding transcription activator 1                                                                | LOC500591                              | 500591 | 1,23 | up   |
| 5866798 | 7293402 | 1604695 | similar to calmodulin-binding transcription activator 1                                                                | LOC500591                              | 500591 | 1,46 | down |
| 5963796 | 7293402 | 1604700 | similar to calmodulin-binding transcription activator 1                                                                | LOC500591                              | 500591 | 1,64 | down |
| 5971476 | 7293402 | 1604717 | similar to calmodulin-binding transcription activator 1                                                                | LOC500591                              | 500591 | 2,06 | down |
| 5989360 | 7293402 | 1604760 | similar to calmodulin-binding transcription activator 1                                                                | LOC500591                              | 500591 | 1,21 | up   |
| 5995477 | 7293402 | 1604690 | similar to calmodulin-binding transcription activator 1                                                                | LOC500591                              | 500591 | 1,04 | down |
| 5997675 | 7293402 | 1604831 | similar to calmodulin-binding transcription activator 1                                                                | LOC500591                              | 500591 | 1,06 | down |
| 6016492 | 7293402 | 1604698 | similar to calmodulin-binding transcription activator 1                                                                | LOC500591                              | 500591 | 1,51 | up   |
| 6026202 | 7293402 | 1604728 | similar to calmodulin-binding transcription activator 1                                                                | LOC500591                              | 500591 | 1,06 | up   |
| 6061502 | 7293402 | 1604722 | similar to calmodulin-binding transcription activator 1                                                                | LOC500591                              | 500591 | 1,70 | down |
| 6091119 | 7293402 | 1604690 | similar to calmodulin-binding transcription activator 1                                                                | LOC500591                              | 500591 | 1,59 | down |
| 6097267 | 7293402 | 1604736 | similar to calmodulin-binding transcription activator 1                                                                | LOC500591                              | 500591 | 1,20 | down |
| 6113703 | 7293402 | 1604719 | similar to calmodulin-binding transcription activator 1                                                                | LOC500591                              | 500591 | 1,17 | down |
| 6121008 | 7293402 | 1604799 | similar to calmodulin-binding transcription activator 1                                                                | LOC500591                              | 500591 | 1,01 | down |
| 6175179 | 7293402 | 1604690 | similar to calmodulin-binding transcription activator 1                                                                | LOC500591                              | 500591 | 1,08 | up   |
| 6185094 | 7293402 | 1604729 | similar to calmodulin-binding transcription activator 1                                                                | LOC500591                              | 500591 | 1,32 | up   |
| 6195462 | 7293402 | 1604723 | similar to calmodulin-binding transcription activator 1                                                                | LOC500591                              | 500591 | 1,28 | up   |
| 6197946 | 7293402 | 1604705 | similar to calmodulin-binding transcription activator 1                                                                | LOC500591                              | 500591 | 1,05 | up   |
| 6224235 | 7293402 | 1604689 | similar to calmodulin-binding transcription activator 1                                                                | LOC500591                              | 500591 | 1,08 | up   |
| 6237565 | 7293402 | 1604722 | similar to calmodulin-binding transcription activator 1                                                                | LOC500591                              | 500591 | 1,02 | up   |
| 6262139 | 7293402 | 1604723 | similar to calmodulin-binding transcription activator 1                                                                | LOC500591                              | 500591 | 1,23 | up   |
| 6269014 | 7293402 | 1604701 | similar to calmodulin-binding transcription activator 1                                                                | LOC500591                              | 500591 | 1,47 | down |
| 6276034 | 7293402 | 1604723 | similar to calmodulin-binding transcription activator 1                                                                | LOC500591                              | 500591 | 1,61 | down |
| 6341243 | 7293402 | 1604728 | similar to calmodulin-binding transcription activator 1                                                                | LOC500591                              | 500591 | 1,41 | up   |
| 6366939 | 7293402 | 1604723 | similar to calmodulin-binding transcription activator 1                                                                | LOC500591                              | 500591 | 1,03 | down |
| 6389903 | 7293402 | 1604690 | similar to calmodulin-binding transcription activator 1                                                                | LOC500591                              | 500591 | 1,21 | up   |
| 6404836 | 7293402 | 1604722 | similar to calmodulin-binding transcription activator 1                                                                | LOC500591                              | 500591 | 1,34 | up   |
| 6569962 | 7293402 | 1604700 | similar to calmodulin-binding transcription activator 1                                                                | LOC500591                              | 500591 | 1,06 | up   |
| 6592993 | 7293402 | 1604689 | similar to calmodulin-binding transcription activator 1                                                                | LOC500591                              | 500591 | 1,08 | up   |
| 6629585 | 7293402 | 1604689 | similar to calmodulin-binding transcription activator 1                                                                | LOC500591                              | 500591 | 1,09 | down |
| 6662031 | 7293402 | 1604697 | similar to calmodulin-binding transcription activator 1                                                                | LOC500591                              | 500591 | 1,23 | up   |
| 6735469 | 7293402 | 1604694 | similar to calmodulin-binding transcription activator 1                                                                | LOC500591                              | 500591 | 1,65 | down |
| 5819009 | 7266778 | 1538854 | similar to Camello-like 2                                                                                              | LOC681227                              | 681227 | 1,06 | up   |
| 6371160 | 7266778 | 1538854 | similar to Camello-like 2 /// similar to RIKEN cDNA 1700019G17                                                         | LOC681227 /// RGD156 681227 /// 500238 |        | 1,35 | down |
| 6270502 | 7266778 | 1538854 | similar to Camello-like 2 /// similar to RIKEN cDNA 1700019G17 /// camello-like27 /// RGD1563507227 /// 500238 /// 500 |                                        |        | 1,36 | up   |
| 5657547 | 7158269 | 1271078 | similar to cDNA sequence AF397014                                                                                      | RGD1308114                             | 361253 | 1,54 | up   |
| 5692021 | 7158269 | 1271075 | similar to cDNA sequence AF397014                                                                                      | RGD1308114                             | 361253 | 1,38 | up   |
| 5888432 | 7158269 | 1271080 | similar to cDNA sequence AF397014                                                                                      | RGD1308114                             | 361253 | 1,13 | up   |
| 5925973 | 7158269 | 1271073 | similar to cDNA sequence AF397014                                                                                      | RGD1308114                             | 361253 | 2,10 | up   |
| 5946472 | 7158269 | 1271077 | similar to cDNA sequence AF397014                                                                                      | RGD1308114                             | 361253 | 1,13 | up   |
| 6072441 | 7158269 | 1271081 | similar to cDNA sequence AF397014                                                                                      | RGD1308114                             | 361253 | 1,10 | up   |
| 6076627 | 7158269 | 1271070 | similar to cDNA sequence AF397014                                                                                      | RGD1308114                             | 361253 | 1,22 | down |
| 6102828 | 7158269 | 1271079 | similar to cDNA sequence AF397014                                                                                      | RGD1308114                             | 361253 | 1,19 | up   |
| 6225013 | 7158269 | 1271069 | similar to cDNA sequence AF397014                                                                                      | RGD1308114                             | 361253 | 1,01 | down |
| 6260457 | 7158269 | 1271074 | similar to cDNA sequence AF397014                                                                                      | RGD1308114                             | 361253 | 2,06 | down |
| 6311860 | 7158269 | 1271071 | similar to cDNA sequence AF397014                                                                                      | RGD1308114                             | 361253 | 1,03 | down |
| 6339655 | 7158269 | 1271074 | similar to cDNA sequence AF397014                                                                                      | RGD1308114                             | 361253 | 1,01 | up   |
| 6453000 | 7158269 | 1271076 | similar to cDNA sequence AF397014                                                                                      | RGD1308114                             | 361253 | 1,03 | up   |
| 6594230 | 7158269 | 1271072 | similar to cDNA sequence AF397014                                                                                      | RGD1308114                             | 361253 | 1,15 | down |
| 6699593 | 7158269 | 1271068 | similar to cDNA sequence AF397014                                                                                      | RGD1308114                             | 361253 | 1,29 | up   |
| 6701223 | 7158269 | 1271070 | similar to cDNA sequence AF397014                                                                                      | RGD1308114                             | 361253 | 1,36 | up   |
| 5649947 | 7349546 | 1743794 | similar to CDV-3B                                                                                                      | LOC315970                              | 315970 | 1,12 | down |

|         |         |         |                                 |            |        |      |      |
|---------|---------|---------|---------------------------------|------------|--------|------|------|
| 5794460 | 7349546 | 1743791 | similar to CDV-3B               | LOC315970  | 315970 | 1,00 | down |
| 5905216 | 7349546 | 1743791 | similar to CDV-3B               | LOC315970  | 315970 | 1,32 | down |
| 6022619 | 7349546 | 1743792 | similar to CDV-3B               | LOC315970  | 315970 | 1,14 | up   |
| 6064717 | 7349546 | 1743792 | similar to CDV-3B               | LOC315970  | 315970 | 1,00 | down |
| 6165843 | 7349546 | 1743790 | similar to CDV-3B               | LOC315970  | 315970 | 1,17 | up   |
| 6227483 | 7349546 | 1743793 | similar to CDV-3B               | LOC315970  | 315970 | 1,08 | up   |
| 6502291 | 7349546 | 1743794 | similar to CDV-3B               | LOC315970  | 315970 | 2,05 | down |
| 5660597 | 7240739 | 1476030 | similar to ceramide kinase-like | RGD1561057 | 502640 | 1,21 | down |
| 5695704 | 7240739 | 1476016 | similar to ceramide kinase-like | RGD1561057 | 502640 | 1,50 | down |
| 5856547 | 7240739 | 1476024 | similar to ceramide kinase-like | RGD1561057 | 502640 | 1,13 | up   |
| 5894484 | 7240739 | 1476021 | similar to ceramide kinase-like | RGD1561057 | 502640 | 2,20 | up   |
| 6030071 | 7240739 | 1476036 | similar to ceramide kinase-like | RGD1561057 | 502640 | 1,47 | up   |
| 6050814 | 7240739 | 1476010 | similar to ceramide kinase-like | RGD1561057 | 502640 | 1,50 | down |
| 6206670 | 7240739 | 1476009 | similar to ceramide kinase-like | RGD1561057 | 502640 | 1,06 | up   |
| 6375440 | 7240739 | 1476015 | similar to ceramide kinase-like | RGD1561057 | 502640 | 1,28 | up   |
| 6406094 | 7240739 | 1476026 | similar to ceramide kinase-like | RGD1561057 | 502640 | 1,45 | up   |
| 6435624 | 7240739 | 1476014 | similar to ceramide kinase-like | RGD1561057 | 502640 | 1,30 | down |
| 6563855 | 7240739 | 1476013 | similar to ceramide kinase-like | RGD1561057 | 502640 | 1,67 | down |
| 6734675 | 7240739 | 1476012 | similar to ceramide kinase-like | RGD1561057 | 502640 | 1,23 | up   |
| 5651429 | 7050167 | 1009809 | similar to CG11133-PA           | LOC689639  | 689639 | 1,11 | down |
| 6014200 | 7050167 | 1009812 | similar to CG11133-PA           | LOC689639  | 689639 | 1,18 | down |
| 6033954 | 7050167 | 1009801 | similar to CG11133-PA           | LOC689639  | 689639 | 1,09 | down |
| 6102040 | 7050167 | 1009806 | similar to CG11133-PA           | LOC689639  | 689639 | 1,34 | down |
| 6115213 | 7050167 | 1009811 | similar to CG11133-PA           | LOC689639  | 689639 | 1,00 | down |
| 6128083 | 7050167 | 1009804 | similar to CG11133-PA           | LOC689639  | 689639 | 1,26 | up   |
| 6222681 | 7050167 | 1009807 | similar to CG11133-PA           | LOC689639  | 689639 | 1,03 | down |
| 6319646 | 7050167 | 1009803 | similar to CG11133-PA           | LOC689639  | 689639 | 2,18 | down |
| 6444522 | 7050167 | 1009813 | similar to CG11133-PA           | LOC689639  | 689639 | 1,09 | down |
| 6447327 | 7050167 | 1009811 | similar to CG11133-PA           | LOC689639  | 689639 | 1,00 | up   |
| 6482680 | 7050167 | 1009802 | similar to CG11133-PA           | LOC689639  | 689639 | 1,04 | up   |
| 6507930 | 7050167 | 1009810 | similar to CG11133-PA           | LOC689639  | 689639 | 1,02 | down |
| 6536904 | 7050167 | 1009808 | similar to CG11133-PA           | LOC689639  | 689639 | 1,17 | down |
| 6687920 | 7050167 | 1009805 | similar to CG11133-PA           | LOC689639  | 689639 | 1,53 | up   |
| 5772200 | 7033337 | 969505  | similar to CG13745-PA           | LOC683179  | 683179 | 1,04 | down |
| 5791383 | 7033337 | 969511  | similar to CG13745-PA           | LOC683179  | 683179 | 1,09 | up   |
| 5793087 | 7033337 | 969481  | similar to CG13745-PA           | LOC683179  | 683179 | 1,13 | down |
| 5951698 | 7033337 | 969476  | similar to CG13745-PA           | LOC683179  | 683179 | 1,34 | up   |
| 5959458 | 7033337 | 969516  | similar to CG13745-PA           | LOC683179  | 683179 | 1,09 | up   |
| 5970892 | 7033337 | 969502  | similar to CG13745-PA           | LOC683179  | 683179 | 1,54 | up   |
| 5982972 | 7033337 | 969477  | similar to CG13745-PA           | LOC683179  | 683179 | 1,07 | down |
| 5986489 | 7033337 | 969478  | similar to CG13745-PA           | LOC683179  | 683179 | 1,05 | up   |
| 6028443 | 7033337 | 969508  | similar to CG13745-PA           | LOC683179  | 683179 | 1,40 | down |
| 6036319 | 7033337 | 969503  | similar to CG13745-PA           | LOC683179  | 683179 | 1,03 | up   |
| 6083474 | 7033337 | 969502  | similar to CG13745-PA           | LOC683179  | 683179 | 1,13 | down |
| 6086941 | 7033337 | 969514  | similar to CG13745-PA           | LOC683179  | 683179 | 1,93 | up   |
| 6237741 | 7033337 | 969516  | similar to CG13745-PA           | LOC683179  | 683179 | 1,01 | down |
| 6250144 | 7033337 | 969510  | similar to CG13745-PA           | LOC683179  | 683179 | 1,40 | up   |
| 6317913 | 7033337 | 969509  | similar to CG13745-PA           | LOC683179  | 683179 | 2,28 | down |
| 6527247 | 7033337 | 969515  | similar to CG13745-PA           | LOC683179  | 683179 | 1,19 | down |
| 6645792 | 7033337 | 969513  | similar to CG13745-PA           | LOC683179  | 683179 | 1,11 | down |
| 6680527 | 7033337 | 969512  | similar to CG13745-PA           | LOC683179  | 683179 | 1,34 | down |
| 5729466 | 7065823 | 1045715 | similar to CG18661-PA           | RGD1307155 | 302998 | 1,33 | up   |
| 5747247 | 7065823 | 1045710 | similar to CG18661-PA           | RGD1307155 | 302998 | 1,20 | down |
| 5973691 | 7065823 | 1045709 | similar to CG18661-PA           | RGD1307155 | 302998 | 1,28 | up   |
| 6028946 | 7065823 | 1045711 | similar to CG18661-PA           | RGD1307155 | 302998 | 1,14 | down |
| 6538580 | 7065823 | 1045712 | similar to CG18661-PA           | RGD1307155 | 302998 | 1,08 | down |

|         |         |         |                                                |            |        |      |      |
|---------|---------|---------|------------------------------------------------|------------|--------|------|------|
| 5706609 | 7030863 | 962597  | similar to CG3740-PA                           | LOC690000  | 690000 | 1,24 | up   |
| 6397432 | 7030863 | 962593  | similar to CG3740-PA                           | LOC690000  | 690000 | 1,64 | down |
| 5642511 | 7234425 | 1459405 | similar to CG6878-PA                           | LOC679572  | 679572 | 1,28 | up   |
| 6288311 | 7234425 | 1459406 | similar to CG6878-PA                           | LOC679572  | 679572 | 1,07 | down |
| 6503250 | 7234425 | 1459404 | similar to CG6878-PA                           | LOC679572  | 679572 | 1,26 | down |
| 5628514 | 7176456 | 1315826 | similar to CG8486-PA, isoform A                | LOC682889  | 682889 | 1,44 | up   |
| 5652729 | 7176456 | 1315806 | similar to CG8486-PA, isoform A                | LOC682889  | 682889 | 1,16 | down |
| 5694306 | 7176456 | 1315827 | similar to CG8486-PA, isoform A                | LOC682889  | 682889 | 1,15 | up   |
| 5828535 | 7176456 | 1315805 | similar to CG8486-PA, isoform A                | LOC682889  | 682889 | 2,39 | up   |
| 5883290 | 7176456 | 1315800 | similar to CG8486-PA, isoform A                | LOC682889  | 682889 | 1,46 | down |
| 5940186 | 7176456 | 1315804 | similar to CG8486-PA, isoform A                | LOC682889  | 682889 | 1,26 | down |
| 5946619 | 7176456 | 1315801 | similar to CG8486-PA, isoform A                | LOC682889  | 682889 | 1,03 | up   |
| 5987380 | 7176456 | 1315796 | similar to CG8486-PA, isoform A                | LOC682889  | 682889 | 1,39 | up   |
| 5991201 | 7176456 | 1315826 | similar to CG8486-PA, isoform A                | LOC682889  | 682889 | 1,09 | down |
| 6025413 | 7176456 | 1315809 | similar to CG8486-PA, isoform A                | LOC682889  | 682889 | 1,26 | down |
| 6080784 | 7176456 | 1315819 | similar to CG8486-PA, isoform A                | LOC682889  | 682889 | 1,22 | up   |
| 6097255 | 7176456 | 1315884 | similar to CG8486-PA, isoform A                | LOC682889  | 682889 | 1,01 | up   |
| 6100260 | 7176456 | 1315799 | similar to CG8486-PA, isoform A                | LOC682889  | 682889 | 1,07 | down |
| 6145891 | 7176456 | 1315863 | similar to CG8486-PA, isoform A                | LOC682889  | 682889 | 1,02 | down |
| 6194504 | 7176456 | 1315813 | similar to CG8486-PA, isoform A                | LOC682889  | 682889 | 1,04 | up   |
| 6259826 | 7176456 | 1315817 | similar to CG8486-PA, isoform A                | LOC682889  | 682889 | 1,01 | up   |
| 6311297 | 7176456 | 1315873 | similar to CG8486-PA, isoform A                | LOC682889  | 682889 | 1,00 | up   |
| 6363982 | 7176456 | 1315812 | similar to CG8486-PA, isoform A                | LOC682889  | 682889 | 1,07 | down |
| 6395982 | 7176456 | 1315813 | similar to CG8486-PA, isoform A                | LOC682889  | 682889 | 1,20 | down |
| 6415377 | 7176456 | 1315824 | similar to CG8486-PA, isoform A                | LOC682889  | 682889 | 1,17 | down |
| 6481811 | 7176456 | 1315827 | similar to CG8486-PA, isoform A                | LOC682889  | 682889 | 1,15 | down |
| 6497132 | 7176456 | 1315819 | similar to CG8486-PA, isoform A                | LOC682889  | 682889 | 1,12 | up   |
| 6520638 | 7176456 | 1315810 | similar to CG8486-PA, isoform A                | LOC682889  | 682889 | 1,14 | down |
| 6570350 | 7176456 | 1315811 | similar to CG8486-PA, isoform A                | LOC682889  | 682889 | 1,28 | down |
| 6665883 | 7176456 | 1315808 | similar to CG8486-PA, isoform A                | LOC682889  | 682889 | 1,19 | down |
| 5640910 | 7196233 | 1366104 | similar to chromosome 1 open reading frame 2   | RGD1306107 | 310640 | 1,07 | down |
| 5675596 | 7196233 | 1366104 | similar to chromosome 1 open reading frame 2   | RGD1306107 | 310640 | 1,12 | up   |
| 5773717 | 7196233 | 1366095 | similar to chromosome 1 open reading frame 2   | RGD1306107 | 310640 | 1,07 | up   |
| 5813175 | 7196233 | 1366096 | similar to chromosome 1 open reading frame 2   | RGD1306107 | 310640 | 1,68 | down |
| 5901186 | 7196233 | 1366105 | similar to chromosome 1 open reading frame 2   | RGD1306107 | 310640 | 1,67 | down |
| 5971663 | 7196233 | 1366100 | similar to chromosome 1 open reading frame 2   | RGD1306107 | 310640 | 1,13 | down |
| 6034211 | 7196233 | 1366103 | similar to chromosome 1 open reading frame 2   | RGD1306107 | 310640 | 1,12 | up   |
| 6044395 | 7196233 | 1366098 | similar to chromosome 1 open reading frame 2   | RGD1306107 | 310640 | 1,08 | down |
| 6050231 | 7196233 | 1366104 | similar to chromosome 1 open reading frame 2   | RGD1306107 | 310640 | 1,64 | up   |
| 6052097 | 7196233 | 1366102 | similar to chromosome 1 open reading frame 2   | RGD1306107 | 310640 | 1,22 | down |
| 6106916 | 7196233 | 1366098 | similar to chromosome 1 open reading frame 2   | RGD1306107 | 310640 | 1,07 | down |
| 6131027 | 7196233 | 1366098 | similar to chromosome 1 open reading frame 2   | RGD1306107 | 310640 | 1,04 | down |
| 6235651 | 7196233 | 1366105 | similar to chromosome 1 open reading frame 2   | RGD1306107 | 310640 | 1,09 | down |
| 6348217 | 7196233 | 1366101 | similar to chromosome 1 open reading frame 2   | RGD1306107 | 310640 | 1,14 | down |
| 6390028 | 7196233 | 1366099 | similar to chromosome 1 open reading frame 2   | RGD1306107 | 310640 | 1,04 | down |
| 6528797 | 7196233 | 1366100 | similar to chromosome 1 open reading frame 2   | RGD1306107 | 310640 | 1,47 | down |
| 6559829 | 7196233 | 1366097 | similar to chromosome 1 open reading frame 2   | RGD1306107 | 310640 | 1,12 | up   |
| 5667710 | 7148978 | 1248513 | similar to chromosome 10 open reading frame 64 | RGD1564142 | 498582 | 1,02 | up   |
| 5705503 | 7148978 | 1248485 | similar to chromosome 10 open reading frame 64 | RGD1564142 | 498582 | 1,13 | down |
| 5745091 | 7148978 | 1248449 | similar to chromosome 10 open reading frame 64 | RGD1564142 | 498582 | 1,16 | down |
| 6119093 | 7148978 | 1248510 | similar to chromosome 10 open reading frame 64 | RGD1564142 | 498582 | 1,15 | up   |
| 6389498 | 7148978 | 1248517 | similar to chromosome 10 open reading frame 64 | RGD1564142 | 498582 | 1,12 | down |
| 6419928 | 7148978 | 1248504 | similar to chromosome 10 open reading frame 64 | RGD1564142 | 498582 | 1,50 | up   |
| 6515905 | 7148978 | 1248518 | similar to chromosome 10 open reading frame 64 | RGD1564142 | 498582 | 1,12 | up   |
| 6611522 | 7148978 | 1248520 | similar to chromosome 10 open reading frame 64 | RGD1564142 | 498582 | 1,01 | up   |
| 6658067 | 7148978 | 1248516 | similar to chromosome 10 open reading frame 64 | RGD1564142 | 498582 | 1,41 | down |

|         |         |         |                                                 |            |        |      |      |
|---------|---------|---------|-------------------------------------------------|------------|--------|------|------|
| 6672115 | 7148978 | 1248519 | similar to chromosome 10 open reading frame 64  | RGD1564142 | 498582 | 1,17 | down |
| 6683120 | 7148978 | 1248512 | similar to chromosome 10 open reading frame 64  | RGD1564142 | 498582 | 1,12 | up   |
| 6168063 | 7299204 | 1619559 | similar to chromosome 14 open reading frame 135 | RGD1563544 | 366665 | 1,10 | down |
| 6658604 | 7307424 | 1641136 | similar to chromosome 14 open reading frame 138 | RGD1306228 | 362748 | 1,02 | down |
| 5618682 | 7186440 | 1341257 | similar to chromosome 16 open reading frame 7   | RGD1565149 | 307923 | 1,40 | down |
| 5785861 | 7186440 | 1341260 | similar to chromosome 16 open reading frame 7   | RGD1565149 | 307923 | 1,01 | up   |
| 5857685 | 7186440 | 1341258 | similar to chromosome 16 open reading frame 7   | RGD1565149 | 307923 | 1,10 | up   |
| 5894613 | 7186440 | 1341249 | similar to chromosome 16 open reading frame 7   | RGD1565149 | 307923 | 1,03 | down |
| 6003546 | 7186440 | 1341255 | similar to chromosome 16 open reading frame 7   | RGD1565149 | 307923 | 2,15 | down |
| 6107283 | 7186440 | 1341261 | similar to chromosome 16 open reading frame 7   | RGD1565149 | 307923 | 1,20 | up   |
| 6111946 | 7186440 | 1341252 | similar to chromosome 16 open reading frame 7   | RGD1565149 | 307923 | 1,14 | down |
| 6139174 | 7186440 | 1341254 | similar to chromosome 16 open reading frame 7   | RGD1565149 | 307923 | 1,28 | up   |
| 6240008 | 7186440 | 1341255 | similar to chromosome 16 open reading frame 7   | RGD1565149 | 307923 | 1,22 | down |
| 6283177 | 7186440 | 1341263 | similar to chromosome 16 open reading frame 7   | RGD1565149 | 307923 | 1,02 | up   |
| 6317711 | 7186440 | 1341250 | similar to chromosome 16 open reading frame 7   | RGD1565149 | 307923 | 1,01 | up   |
| 6335650 | 7186440 | 1341259 | similar to chromosome 16 open reading frame 7   | RGD1565149 | 307923 | 1,05 | up   |
| 6356631 | 7186440 | 1341253 | similar to chromosome 16 open reading frame 7   | RGD1565149 | 307923 | 1,21 | down |
| 6536598 | 7186440 | 1341264 | similar to chromosome 16 open reading frame 7   | RGD1565149 | 307923 | 1,11 | up   |
| 6556830 | 7186440 | 1341251 | similar to chromosome 16 open reading frame 7   | RGD1565149 | 307923 | 1,29 | down |
| 6589501 | 7186440 | 1341255 | similar to chromosome 16 open reading frame 7   | RGD1565149 | 307923 | 1,10 | up   |
| 6683111 | 7186440 | 1341262 | similar to chromosome 16 open reading frame 7   | RGD1565149 | 307923 | 1,34 | up   |
| 6683985 | 7186440 | 1341261 | similar to chromosome 16 open reading frame 7   | RGD1565149 | 307923 | 1,32 | up   |
| 5648836 | 7073928 | 1065787 | similar to chromosome 17 open reading frame 27  | LOC688296  | 688296 | 1,16 | up   |
| 5655432 | 7073928 | 1065795 | similar to chromosome 17 open reading frame 27  | LOC688296  | 688296 | 1,47 | up   |
| 5669571 | 7073928 | 1065800 | similar to chromosome 17 open reading frame 27  | LOC688296  | 688296 | 1,24 | up   |
| 5852355 | 7073928 | 1065802 | similar to chromosome 17 open reading frame 27  | LOC688296  | 688296 | 1,83 | up   |
| 5882783 | 7073928 | 1065812 | similar to chromosome 17 open reading frame 27  | LOC688296  | 688296 | 1,14 | up   |
| 5901154 | 7073928 | 1065784 | similar to chromosome 17 open reading frame 27  | LOC688296  | 688296 | 1,56 | up   |
| 5912792 | 7073928 | 1065792 | similar to chromosome 17 open reading frame 27  | LOC688296  | 688296 | 1,54 | down |
| 5936882 | 7073928 | 1065813 | similar to chromosome 17 open reading frame 27  | LOC688296  | 688296 | 1,25 | down |
| 6063581 | 7073928 | 1065794 | similar to chromosome 17 open reading frame 27  | LOC688296  | 688296 | 1,07 | down |
| 6065417 | 7073928 | 1065803 | similar to chromosome 17 open reading frame 27  | LOC688296  | 688296 | 1,90 | down |
| 6071339 | 7073928 | 1065793 | similar to chromosome 17 open reading frame 27  | LOC688296  | 688296 | 3,14 | down |
| 6096532 | 7073928 | 1065782 | similar to chromosome 17 open reading frame 27  | LOC688296  | 688296 | 1,28 | up   |
| 6111329 | 7073928 | 1065806 | similar to chromosome 17 open reading frame 27  | LOC688296  | 688296 | 2,07 | down |
| 6187219 | 7073928 | 1065783 | similar to chromosome 17 open reading frame 27  | LOC688296  | 688296 | 1,16 | up   |
| 6213322 | 7073928 | 1065811 | similar to chromosome 17 open reading frame 27  | LOC688296  | 688296 | 1,47 | up   |
| 6221838 | 7073928 | 1065814 | similar to chromosome 17 open reading frame 27  | LOC688296  | 688296 | 1,57 | down |
| 6266691 | 7073928 | 1065793 | similar to chromosome 17 open reading frame 27  | LOC688296  | 688296 | 3,58 | down |
| 6276880 | 7073928 | 1065808 | similar to chromosome 17 open reading frame 27  | LOC688296  | 688296 | 1,02 | up   |
| 6330482 | 7073928 | 1065786 | similar to chromosome 17 open reading frame 27  | LOC688296  | 688296 | 1,02 | down |
| 6338438 | 7073928 | 1065810 | similar to chromosome 17 open reading frame 27  | LOC688296  | 688296 | 2,15 | down |
| 6363965 | 7073928 | 1065815 | similar to chromosome 17 open reading frame 27  | LOC688296  | 688296 | 1,31 | down |
| 6380485 | 7073928 | 1065790 | similar to chromosome 17 open reading frame 27  | LOC688296  | 688296 | 2,04 | up   |
| 6475186 | 7073928 | 1065791 | similar to chromosome 17 open reading frame 27  | LOC688296  | 688296 | 1,24 | up   |
| 6481678 | 7073928 | 1065801 | similar to chromosome 17 open reading frame 27  | LOC688296  | 688296 | 1,26 | up   |
| 6493534 | 7073928 | 1065785 | similar to chromosome 17 open reading frame 27  | LOC688296  | 688296 | 1,38 | up   |
| 6538161 | 7073928 | 1065809 | similar to chromosome 17 open reading frame 27  | LOC688296  | 688296 | 1,21 | up   |
| 6599099 | 7073928 | 1065797 | similar to chromosome 17 open reading frame 27  | LOC688296  | 688296 | 1,30 | up   |
| 6679786 | 7073928 | 1065807 | similar to chromosome 17 open reading frame 27  | LOC688296  | 688296 | 1,10 | down |
| 6700923 | 7073928 | 1065798 | similar to chromosome 17 open reading frame 27  | LOC688296  | 688296 | 1,09 | up   |
| 6716406 | 7073928 | 1065796 | similar to chromosome 17 open reading frame 27  | LOC688296  | 688296 | 1,86 | up   |
| 6730743 | 7073928 | 1065788 | similar to chromosome 17 open reading frame 27  | LOC688296  | 688296 | 1,46 | up   |
| 5901772 | 7256238 | 1513037 | similar to chromosome 3 open reading frame 20   | RGD1560289 | 500258 | 1,00 | down |
| 5923649 | 7256238 | 1513043 | similar to chromosome 3 open reading frame 20   | RGD1560289 | 500258 | 1,11 | up   |
| 5925325 | 7256238 | 1513037 | similar to chromosome 3 open reading frame 20   | RGD1560289 | 500258 | 1,16 | down |

|         |         |         |                                                   |            |        |      |      |
|---------|---------|---------|---------------------------------------------------|------------|--------|------|------|
| 5938158 | 7256238 | 1513039 | similar to chromosome 3 open reading frame 20     | RGD1560289 | 500258 | 1,03 | up   |
| 5967432 | 7256238 | 1513046 | similar to chromosome 3 open reading frame 20     | RGD1560289 | 500258 | 1,12 | down |
| 5982969 | 7256238 | 1513045 | similar to chromosome 3 open reading frame 20     | RGD1560289 | 500258 | 1,21 | down |
| 6013510 | 7256238 | 1513036 | similar to chromosome 3 open reading frame 20     | RGD1560289 | 500258 | 1,03 | down |
| 6132029 | 7256238 | 1513054 | similar to chromosome 3 open reading frame 20     | RGD1560289 | 500258 | 1,09 | down |
| 6278900 | 7256238 | 1513053 | similar to chromosome 3 open reading frame 20     | RGD1560289 | 500258 | 1,02 | up   |
| 6345904 | 7256238 | 1513044 | similar to chromosome 3 open reading frame 20     | RGD1560289 | 500258 | 1,29 | down |
| 6366131 | 7256238 | 1513047 | similar to chromosome 3 open reading frame 20     | RGD1560289 | 500258 | 1,13 | down |
| 6380400 | 7256238 | 1513055 | similar to chromosome 3 open reading frame 20     | RGD1560289 | 500258 | 1,31 | up   |
| 6396525 | 7256238 | 1513034 | similar to chromosome 3 open reading frame 20     | RGD1560289 | 500258 | 1,15 | up   |
| 6475471 | 7256238 | 1513056 | similar to chromosome 3 open reading frame 20     | RGD1560289 | 500258 | 1,01 | up   |
| 6490875 | 7256238 | 1513049 | similar to chromosome 3 open reading frame 20     | RGD1560289 | 500258 | 2,28 | down |
| 6558007 | 7256238 | 1513051 | similar to chromosome 3 open reading frame 20     | RGD1560289 | 500258 | 1,18 | up   |
| 6597134 | 7256238 | 1513048 | similar to chromosome 3 open reading frame 20     | RGD1560289 | 500258 | 1,49 | down |
| 6642876 | 7256238 | 1513052 | similar to chromosome 3 open reading frame 20     | RGD1560289 | 500258 | 1,55 | down |
| 6704374 | 7256238 | 1513038 | similar to chromosome 3 open reading frame 20     | RGD1560289 | 500258 | 1,09 | down |
| 6715812 | 7256238 | 1513037 | similar to chromosome 3 open reading frame 20     | RGD1560289 | 500258 | 1,18 | up   |
| 6058437 | 7027759 | 956133  | similar to chromosome 6 open reading frame 70     | RGD1562376 | 499055 | 1,05 | up   |
| 5777615 | 7381352 | 1823759 | similar to chromosome X open reading frame 23     | RGD1562161 | 501559 | 1,20 | up   |
| 5824789 | 7381352 | 1823755 | similar to chromosome X open reading frame 23     | RGD1562161 | 501559 | 1,21 | up   |
| 5830348 | 7381352 | 1823755 | similar to chromosome X open reading frame 23     | RGD1562161 | 501559 | 1,28 | down |
| 5892300 | 7381352 | 1823754 | similar to chromosome X open reading frame 23     | RGD1562161 | 501559 | 1,93 | up   |
| 5972252 | 7381352 | 1823752 | similar to chromosome X open reading frame 23     | RGD1562161 | 501559 | 1,30 | up   |
| 6006172 | 7381352 | 1823753 | similar to chromosome X open reading frame 23     | RGD1562161 | 501559 | 1,60 | down |
| 6181832 | 7381352 | 1823747 | similar to chromosome X open reading frame 23     | RGD1562161 | 501559 | 1,42 | down |
| 6193538 | 7381352 | 1823751 | similar to chromosome X open reading frame 23     | RGD1562161 | 501559 | 1,43 | down |
| 6239885 | 7381352 | 1823745 | similar to chromosome X open reading frame 23     | RGD1562161 | 501559 | 1,48 | up   |
| 6293332 | 7381352 | 1823747 | similar to chromosome X open reading frame 23     | RGD1562161 | 501559 | 1,15 | down |
| 6348865 | 7381352 | 1823749 | similar to chromosome X open reading frame 23     | RGD1562161 | 501559 | 1,10 | down |
| 6358489 | 7381352 | 1823755 | similar to chromosome X open reading frame 23     | RGD1562161 | 501559 | 1,42 | up   |
| 6456438 | 7381352 | 1823755 | similar to chromosome X open reading frame 23     | RGD1562161 | 501559 | 3,60 | up   |
| 6488773 | 7381352 | 1823742 | similar to chromosome X open reading frame 23     | RGD1562161 | 501559 | 1,18 | down |
| 6510050 | 7381352 | 1823746 | similar to chromosome X open reading frame 23     | RGD1562161 | 501559 | 1,09 | up   |
| 6586304 | 7381352 | 1823742 | similar to chromosome X open reading frame 23     | RGD1562161 | 501559 | 1,06 | down |
| 6592587 | 7381352 | 1823756 | similar to chromosome X open reading frame 23     | RGD1562161 | 501559 | 1,04 | up   |
| 5628569 | 7357813 | 1764121 | similar to ciliary rootlet coiled-coil, rootletin | LOC685219  | 685219 | 1,44 | down |
| 5948512 | 7357813 | 1764115 | similar to ciliary rootlet coiled-coil, rootletin | LOC685219  | 685219 | 1,04 | up   |
| 6340848 | 7357813 | 1764119 | similar to ciliary rootlet coiled-coil, rootletin | LOC685219  | 685219 | 2,25 | down |
| 6366224 | 7357813 | 1764113 | similar to ciliary rootlet coiled-coil, rootletin | LOC685219  | 685219 | 1,01 | up   |
| 6389970 | 7357813 | 1764117 | similar to ciliary rootlet coiled-coil, rootletin | LOC685219  | 685219 | 1,16 | down |
| 6705378 | 7357813 | 1764114 | similar to ciliary rootlet coiled-coil, rootletin | LOC685219  | 685219 | 1,17 | down |
| 5692138 | 7324337 | 1682063 | similar to citrate synthase                       | RGD1565753 | 299750 | 1,12 | up   |
| 5785479 | 7324337 | 1682063 | similar to citrate synthase                       | RGD1565753 | 299750 | 1,35 | down |
| 5813981 | 7324337 | 1682061 | similar to citrate synthase                       | RGD1565753 | 299750 | 1,03 | up   |
| 5863155 | 7324337 | 1682061 | similar to citrate synthase                       | RGD1565753 | 299750 | 1,84 | down |
| 5991943 | 7324337 | 1682060 | similar to citrate synthase                       | RGD1565753 | 299750 | 1,24 | down |
| 6429490 | 7324337 | 1682059 | similar to citrate synthase                       | RGD1565753 | 299750 | 1,10 | up   |
| 5620722 | 7029181 | 959078  | similar to coiled-coil domain containing 8        | MGC72567   | 494320 | 1,51 | up   |
| 5632044 | 7029181 | 959075  | similar to coiled-coil domain containing 8        | MGC72567   | 494320 | 1,50 | down |
| 5667148 | 7029181 | 959076  | similar to coiled-coil domain containing 8        | MGC72567   | 494320 | 1,10 | down |
| 5740875 | 7029181 | 959075  | similar to coiled-coil domain containing 8        | MGC72567   | 494320 | 1,08 | down |
| 5842079 | 7029181 | 959075  | similar to coiled-coil domain containing 8        | MGC72567   | 494320 | 1,06 | up   |
| 5846129 | 7029181 | 959075  | similar to coiled-coil domain containing 8        | MGC72567   | 494320 | 1,12 | down |
| 5897422 | 7029181 | 959077  | similar to coiled-coil domain containing 8        | MGC72567   | 494320 | 1,18 | up   |
| 6001445 | 7029181 | 959075  | similar to coiled-coil domain containing 8        | MGC72567   | 494320 | 1,09 | down |
| 6102704 | 7029181 | 959074  | similar to coiled-coil domain containing 8        | MGC72567   | 494320 | 1,03 | down |

|         |         |         |                                                          |           |        |      |      |
|---------|---------|---------|----------------------------------------------------------|-----------|--------|------|------|
| 6109180 | 7029181 | 959075  | similar to coiled-coil domain containing 8               | MGC72567  | 494320 | 2,53 | up   |
| 6210013 | 7029181 | 959075  | similar to coiled-coil domain containing 8               | MGC72567  | 494320 | 1,37 | up   |
| 6346299 | 7029181 | 959078  | similar to coiled-coil domain containing 8               | MGC72567  | 494320 | 1,33 | down |
| 6405956 | 7029181 | 959078  | similar to coiled-coil domain containing 8               | MGC72567  | 494320 | 1,42 | up   |
| 6636070 | 7029181 | 959078  | similar to coiled-coil domain containing 8               | MGC72567  | 494320 | 1,14 | up   |
| 6688669 | 7029181 | 959078  | similar to coiled-coil domain containing 8               | MGC72567  | 494320 | 1,31 | down |
| 6720035 | 7029181 | 959078  | similar to coiled-coil domain containing 8               | MGC72567  | 494320 | 1,07 | down |
| 5715751 | 7253272 | 1505624 | similar to contactin associated protein-like 2 isoform a | LOC500105 | 500105 | 1,35 | down |
| 5806434 | 7253272 | 1505676 | similar to contactin associated protein-like 2 isoform a | LOC500105 | 500105 | 1,78 | down |
| 5814503 | 7253272 | 1505636 | similar to contactin associated protein-like 2 isoform a | LOC500105 | 500105 | 1,01 | down |
| 5910443 | 7253272 | 1505695 | similar to contactin associated protein-like 2 isoform a | LOC500105 | 500105 | 2,17 | up   |
| 5920229 | 7253272 | 1505699 | similar to contactin associated protein-like 2 isoform a | LOC500105 | 500105 | 1,31 | up   |
| 5946378 | 7253272 | 1505698 | similar to contactin associated protein-like 2 isoform a | LOC500105 | 500105 | 1,14 | up   |
| 6027370 | 7253272 | 1505593 | similar to contactin associated protein-like 2 isoform a | LOC500105 | 500105 | 1,15 | up   |
| 6038996 | 7253272 | 1505586 | similar to contactin associated protein-like 2 isoform a | LOC500105 | 500105 | 1,24 | down |
| 6073582 | 7253272 | 1505662 | similar to contactin associated protein-like 2 isoform a | LOC500105 | 500105 | 1,24 | down |
| 6313029 | 7253272 | 1505644 | similar to contactin associated protein-like 2 isoform a | LOC500105 | 500105 | 1,36 | down |
| 6518260 | 7253272 | 1505678 | similar to contactin associated protein-like 2 isoform a | LOC500105 | 500105 | 1,03 | down |
| 6618875 | 7253272 | 1505664 | similar to contactin associated protein-like 2 isoform a | LOC500105 | 500105 | 1,02 | up   |
| 6619159 | 7253272 | 1505685 | similar to contactin associated protein-like 2 isoform a | LOC500105 | 500105 | 1,41 | down |
| 6647294 | 7253272 | 1505604 | similar to contactin associated protein-like 2 isoform a | LOC500105 | 500105 | 1,30 | down |
| 5648550 | 7109424 | 1151140 | similar to contactin associated protein-like 5 isoform 1 | LOC304725 | 304725 | 1,39 | down |
| 5663226 | 7109424 | 1151138 | similar to contactin associated protein-like 5 isoform 1 | LOC304725 | 304725 | 1,07 | up   |
| 5809694 | 7109424 | 1151140 | similar to contactin associated protein-like 5 isoform 1 | LOC304725 | 304725 | 1,20 | down |
| 5849396 | 7109424 | 1151156 | similar to contactin associated protein-like 5 isoform 1 | LOC304725 | 304725 | 1,47 | down |
| 5852158 | 7109424 | 1151117 | similar to contactin associated protein-like 5 isoform 1 | LOC304725 | 304725 | 1,05 | up   |
| 5937954 | 7109424 | 1151116 | similar to contactin associated protein-like 5 isoform 1 | LOC304725 | 304725 | 1,11 | up   |
| 5992921 | 7109424 | 1151124 | similar to contactin associated protein-like 5 isoform 1 | LOC304725 | 304725 | 1,03 | down |
| 6003780 | 7109424 | 1151164 | similar to contactin associated protein-like 5 isoform 1 | LOC304725 | 304725 | 1,21 | up   |
| 6116703 | 7109424 | 1151141 | similar to contactin associated protein-like 5 isoform 1 | LOC304725 | 304725 | 1,53 | up   |
| 6206562 | 7109424 | 1151114 | similar to contactin associated protein-like 5 isoform 1 | LOC304725 | 304725 | 1,41 | down |
| 6249788 | 7109424 | 1151148 | similar to contactin associated protein-like 5 isoform 1 | LOC304725 | 304725 | 1,03 | down |
| 6432375 | 7109424 | 1151135 | similar to contactin associated protein-like 5 isoform 1 | LOC304725 | 304725 | 1,09 | up   |
| 6525321 | 7109424 | 1151163 | similar to contactin associated protein-like 5 isoform 1 | LOC304725 | 304725 | 1,10 | up   |
| 6528310 | 7109424 | 1151169 | similar to contactin associated protein-like 5 isoform 1 | LOC304725 | 304725 | 1,13 | down |
| 6541568 | 7109424 | 1151152 | similar to contactin associated protein-like 5 isoform 1 | LOC304725 | 304725 | 1,05 | down |
| 6580383 | 7109424 | 1151134 | similar to contactin associated protein-like 5 isoform 1 | LOC304725 | 304725 | 1,35 | down |
| 6584067 | 7109424 | 1151162 | similar to contactin associated protein-like 5 isoform 1 | LOC304725 | 304725 | 1,16 | down |
| 6641981 | 7109424 | 1151114 | similar to contactin associated protein-like 5 isoform 1 | LOC304725 | 304725 | 1,01 | up   |
| 6734325 | 7109424 | 1151115 | similar to contactin associated protein-like 5 isoform 1 | LOC304725 | 304725 | 1,41 | up   |
| 5633827 | 7327249 | 1688591 | similar to CUB and Sushi multiple domains 3 isoform 1    | LOC314942 | 314942 | 1,09 | up   |
| 5668842 | 7327249 | 1688588 | similar to CUB and Sushi multiple domains 3 isoform 1    | LOC314942 | 314942 | 1,01 | up   |
| 5678471 | 7327249 | 1688655 | similar to CUB and Sushi multiple domains 3 isoform 1    | LOC314942 | 314942 | 1,00 | down |
| 5683428 | 7327249 | 1688636 | similar to CUB and Sushi multiple domains 3 isoform 1    | LOC314942 | 314942 | 1,18 | up   |
| 5697160 | 7327249 | 1688645 | similar to CUB and Sushi multiple domains 3 isoform 1    | LOC314942 | 314942 | 1,31 | down |
| 5699404 | 7327249 | 1688591 | similar to CUB and Sushi multiple domains 3 isoform 1    | LOC314942 | 314942 | 1,03 | up   |
| 5703585 | 7327249 | 1688583 | similar to CUB and Sushi multiple domains 3 isoform 1    | LOC314942 | 314942 | 1,31 | up   |
| 5709369 | 7327249 | 1688633 | similar to CUB and Sushi multiple domains 3 isoform 1    | LOC314942 | 314942 | 1,02 | down |
| 5714258 | 7327249 | 1688573 | similar to CUB and Sushi multiple domains 3 isoform 1    | LOC314942 | 314942 | 1,06 | down |
| 5717276 | 7327249 | 1688575 | similar to CUB and Sushi multiple domains 3 isoform 1    | LOC314942 | 314942 | 1,11 | down |
| 5747284 | 7327249 | 1688613 | similar to CUB and Sushi multiple domains 3 isoform 1    | LOC314942 | 314942 | 1,24 | up   |
| 5749674 | 7327249 | 1688648 | similar to CUB and Sushi multiple domains 3 isoform 1    | LOC314942 | 314942 | 1,08 | down |
| 5762855 | 7327249 | 1688596 | similar to CUB and Sushi multiple domains 3 isoform 1    | LOC314942 | 314942 | 1,01 | up   |
| 5768777 | 7327249 | 1688607 | similar to CUB and Sushi multiple domains 3 isoform 1    | LOC314942 | 314942 | 1,24 | down |
| 5795010 | 7327249 | 1688585 | similar to CUB and Sushi multiple domains 3 isoform 1    | LOC314942 | 314942 | 1,16 | up   |
| 5797603 | 7327249 | 1688593 | similar to CUB and Sushi multiple domains 3 isoform 1    | LOC314942 | 314942 | 1,09 | down |



|         |         |         |                                                       |           |        |      |      |
|---------|---------|---------|-------------------------------------------------------|-----------|--------|------|------|
| 5800600 | 7327249 | 1688590 | similar to CUB and Sushi multiple domains 3 isoform 1 | LOC314942 | 314942 | 1,05 | up   |
| 5821039 | 7327249 | 1688601 | similar to CUB and Sushi multiple domains 3 isoform 1 | LOC314942 | 314942 | 1,08 | down |
| 5821516 | 7327249 | 1688687 | similar to CUB and Sushi multiple domains 3 isoform 1 | LOC314942 | 314942 | 1,01 | down |
| 5829461 | 7327249 | 1688597 | similar to CUB and Sushi multiple domains 3 isoform 1 | LOC314942 | 314942 | 1,48 | down |
| 5857909 | 7327249 | 1688676 | similar to CUB and Sushi multiple domains 3 isoform 1 | LOC314942 | 314942 | 1,13 | up   |
| 5859763 | 7327249 | 1688647 | similar to CUB and Sushi multiple domains 3 isoform 1 | LOC314942 | 314942 | 1,19 | up   |
| 5861159 | 7327249 | 1688634 | similar to CUB and Sushi multiple domains 3 isoform 1 | LOC314942 | 314942 | 1,08 | down |
| 5890231 | 7327249 | 1688672 | similar to CUB and Sushi multiple domains 3 isoform 1 | LOC314942 | 314942 | 1,00 | up   |
| 5893968 | 7327249 | 1688637 | similar to CUB and Sushi multiple domains 3 isoform 1 | LOC314942 | 314942 | 1,14 | down |
| 5901102 | 7327249 | 1688663 | similar to CUB and Sushi multiple domains 3 isoform 1 | LOC314942 | 314942 | 1,00 | up   |
| 5936597 | 7327249 | 1688695 | similar to CUB and Sushi multiple domains 3 isoform 1 | LOC314942 | 314942 | 1,24 | up   |
| 5956013 | 7327249 | 1688579 | similar to CUB and Sushi multiple domains 3 isoform 1 | LOC314942 | 314942 | 1,08 | up   |
| 5977746 | 7327249 | 1688650 | similar to CUB and Sushi multiple domains 3 isoform 1 | LOC314942 | 314942 | 1,48 | down |
| 5994908 | 7327249 | 1688622 | similar to CUB and Sushi multiple domains 3 isoform 1 | LOC314942 | 314942 | 1,09 | down |
| 5998971 | 7327249 | 1688646 | similar to CUB and Sushi multiple domains 3 isoform 1 | LOC314942 | 314942 | 1,53 | up   |
| 6006477 | 7327249 | 1688661 | similar to CUB and Sushi multiple domains 3 isoform 1 | LOC314942 | 314942 | 1,13 | up   |
| 6008133 | 7327249 | 1688604 | similar to CUB and Sushi multiple domains 3 isoform 1 | LOC314942 | 314942 | 1,08 | down |
| 6009877 | 7327249 | 1688616 | similar to CUB and Sushi multiple domains 3 isoform 1 | LOC314942 | 314942 | 1,24 | down |
| 6018713 | 7327249 | 1688620 | similar to CUB and Sushi multiple domains 3 isoform 1 | LOC314942 | 314942 | 1,21 | up   |
| 6047056 | 7327249 | 1688584 | similar to CUB and Sushi multiple domains 3 isoform 1 | LOC314942 | 314942 | 1,06 | up   |
| 6047654 | 7327249 | 1688653 | similar to CUB and Sushi multiple domains 3 isoform 1 | LOC314942 | 314942 | 1,44 | up   |
| 6073543 | 7327249 | 1688599 | similar to CUB and Sushi multiple domains 3 isoform 1 | LOC314942 | 314942 | 1,03 | up   |
| 6077387 | 7327249 | 1688587 | similar to CUB and Sushi multiple domains 3 isoform 1 | LOC314942 | 314942 | 1,10 | up   |
| 6095830 | 7327249 | 1688573 | similar to CUB and Sushi multiple domains 3 isoform 1 | LOC314942 | 314942 | 1,05 | up   |
| 6118380 | 7327249 | 1688589 | similar to CUB and Sushi multiple domains 3 isoform 1 | LOC314942 | 314942 | 1,09 | up   |
| 6139912 | 7327249 | 1688586 | similar to CUB and Sushi multiple domains 3 isoform 1 | LOC314942 | 314942 | 1,00 | up   |
| 6145151 | 7327249 | 1688634 | similar to CUB and Sushi multiple domains 3 isoform 1 | LOC314942 | 314942 | 2,35 | up   |
| 6158892 | 7327249 | 1688595 | similar to CUB and Sushi multiple domains 3 isoform 1 | LOC314942 | 314942 | 1,00 | up   |
| 6164027 | 7327249 | 1688631 | similar to CUB and Sushi multiple domains 3 isoform 1 | LOC314942 | 314942 | 1,06 | up   |
| 6189492 | 7327249 | 1688573 | similar to CUB and Sushi multiple domains 3 isoform 1 | LOC314942 | 314942 | 1,00 | down |
| 6194245 | 7327249 | 1688581 | similar to CUB and Sushi multiple domains 3 isoform 1 | LOC314942 | 314942 | 1,00 | down |
| 6198255 | 7327249 | 1688674 | similar to CUB and Sushi multiple domains 3 isoform 1 | LOC314942 | 314942 | 1,51 | up   |
| 6206185 | 7327249 | 1688641 | similar to CUB and Sushi multiple domains 3 isoform 1 | LOC314942 | 314942 | 1,00 | up   |
| 6208704 | 7327249 | 1688630 | similar to CUB and Sushi multiple domains 3 isoform 1 | LOC314942 | 314942 | 1,36 | up   |
| 6218006 | 7327249 | 1688715 | similar to CUB and Sushi multiple domains 3 isoform 1 | LOC314942 | 314942 | 1,12 | up   |
| 6231042 | 7327249 | 1688577 | similar to CUB and Sushi multiple domains 3 isoform 1 | LOC314942 | 314942 | 1,55 | up   |
| 6238716 | 7327249 | 1688665 | similar to CUB and Sushi multiple domains 3 isoform 1 | LOC314942 | 314942 | 1,19 | down |
| 6245387 | 7327249 | 1688702 | similar to CUB and Sushi multiple domains 3 isoform 1 | LOC314942 | 314942 | 1,22 | down |
| 6296435 | 7327249 | 1688604 | similar to CUB and Sushi multiple domains 3 isoform 1 | LOC314942 | 314942 | 1,71 | down |
| 6305234 | 7327249 | 1688676 | similar to CUB and Sushi multiple domains 3 isoform 1 | LOC314942 | 314942 | 1,23 | up   |
| 6312373 | 7327249 | 1688580 | similar to CUB and Sushi multiple domains 3 isoform 1 | LOC314942 | 314942 | 1,31 | down |
| 6319662 | 7327249 | 1688715 | similar to CUB and Sushi multiple domains 3 isoform 1 | LOC314942 | 314942 | 1,64 | down |
| 6331465 | 7327249 | 1688680 | similar to CUB and Sushi multiple domains 3 isoform 1 | LOC314942 | 314942 | 1,12 | down |
| 6345452 | 7327249 | 1688640 | similar to CUB and Sushi multiple domains 3 isoform 1 | LOC314942 | 314942 | 1,06 | down |
| 6348966 | 7327249 | 1688606 | similar to CUB and Sushi multiple domains 3 isoform 1 | LOC314942 | 314942 | 1,26 | down |
| 6349679 | 7327249 | 1688594 | similar to CUB and Sushi multiple domains 3 isoform 1 | LOC314942 | 314942 | 1,30 | down |
| 6367634 | 7327249 | 1688627 | similar to CUB and Sushi multiple domains 3 isoform 1 | LOC314942 | 314942 | 1,00 | up   |
| 6396235 | 7327249 | 1688630 | similar to CUB and Sushi multiple domains 3 isoform 1 | LOC314942 | 314942 | 1,12 | up   |
| 6399199 | 7327249 | 1688573 | similar to CUB and Sushi multiple domains 3 isoform 1 | LOC314942 | 314942 | 1,00 | up   |
| 6405157 | 7327249 | 1688650 | similar to CUB and Sushi multiple domains 3 isoform 1 | LOC314942 | 314942 | 1,02 | up   |
| 6422157 | 7327249 | 1688602 | similar to CUB and Sushi multiple domains 3 isoform 1 | LOC314942 | 314942 | 1,10 | up   |
| 6422584 | 7327249 | 1688630 | similar to CUB and Sushi multiple domains 3 isoform 1 | LOC314942 | 314942 | 1,05 | down |
| 6422967 | 7327249 | 1688603 | similar to CUB and Sushi multiple domains 3 isoform 1 | LOC314942 | 314942 | 1,11 | up   |
| 6463993 | 7327249 | 1688605 | similar to CUB and Sushi multiple domains 3 isoform 1 | LOC314942 | 314942 | 1,14 | down |
| 6479583 | 7327249 | 1688574 | similar to CUB and Sushi multiple domains 3 isoform 1 | LOC314942 | 314942 | 1,11 | down |
| 6497410 | 7327249 | 1688661 | similar to CUB and Sushi multiple domains 3 isoform 1 | LOC314942 | 314942 | 1,06 | down |

|         |         |         |                                                       |            |        |      |      |
|---------|---------|---------|-------------------------------------------------------|------------|--------|------|------|
| 6507727 | 7327249 | 1688621 | similar to CUB and Sushi multiple domains 3 isoform 1 | LOC314942  | 314942 | 1,07 | down |
| 6523545 | 7327249 | 1688715 | similar to CUB and Sushi multiple domains 3 isoform 1 | LOC314942  | 314942 | 1,20 | down |
| 6544463 | 7327249 | 1688592 | similar to CUB and Sushi multiple domains 3 isoform 1 | LOC314942  | 314942 | 1,27 | down |
| 6545668 | 7327249 | 1688582 | similar to CUB and Sushi multiple domains 3 isoform 1 | LOC314942  | 314942 | 1,00 | up   |
| 6640438 | 7327249 | 1688573 | similar to CUB and Sushi multiple domains 3 isoform 1 | LOC314942  | 314942 | 1,17 | down |
| 6660961 | 7327249 | 1688654 | similar to CUB and Sushi multiple domains 3 isoform 1 | LOC314942  | 314942 | 1,12 | down |
| 6670254 | 7327249 | 1688611 | similar to CUB and Sushi multiple domains 3 isoform 1 | LOC314942  | 314942 | 1,09 | up   |
| 6677712 | 7327249 | 1688701 | similar to CUB and Sushi multiple domains 3 isoform 1 | LOC314942  | 314942 | 1,09 | down |
| 6679324 | 7327249 | 1688578 | similar to CUB and Sushi multiple domains 3 isoform 1 | LOC314942  | 314942 | 1,09 | down |
| 6687733 | 7327249 | 1688573 | similar to CUB and Sushi multiple domains 3 isoform 1 | LOC314942  | 314942 | 1,82 | down |
| 6692715 | 7327249 | 1688638 | similar to CUB and Sushi multiple domains 3 isoform 1 | LOC314942  | 314942 | 1,39 | up   |
| 6705338 | 7327249 | 1688649 | similar to CUB and Sushi multiple domains 3 isoform 1 | LOC314942  | 314942 | 1,15 | down |
| 5726697 | 7153589 | 1259074 | similar to cullin 4A                                  | RGD1563853 | 361181 | 1,16 | down |
| 5816235 | 7153589 | 1259070 | similar to cullin 4A                                  | RGD1563853 | 361181 | 1,71 | down |
| 5832142 | 7153589 | 1259071 | similar to cullin 4A                                  | RGD1563853 | 361181 | 1,09 | up   |
| 5907300 | 7153589 | 1259078 | similar to cullin 4A                                  | RGD1563853 | 361181 | 1,35 | up   |
| 5929039 | 7153589 | 1259089 | similar to cullin 4A                                  | RGD1563853 | 361181 | 1,33 | up   |
| 6068028 | 7153589 | 1259068 | similar to cullin 4A                                  | RGD1563853 | 361181 | 1,06 | down |
| 6109819 | 7153589 | 1259079 | similar to cullin 4A                                  | RGD1563853 | 361181 | 1,65 | up   |
| 6127303 | 7153589 | 1259069 | similar to cullin 4A                                  | RGD1563853 | 361181 | 1,16 | down |
| 6129299 | 7153589 | 1259084 | similar to cullin 4A                                  | RGD1563853 | 361181 | 1,17 | up   |
| 6133625 | 7153589 | 1259086 | similar to cullin 4A                                  | RGD1563853 | 361181 | 1,54 | up   |
| 6149173 | 7153589 | 1259094 | similar to cullin 4A                                  | RGD1563853 | 361181 | 1,02 | down |
| 6172352 | 7153589 | 1259068 | similar to cullin 4A                                  | RGD1563853 | 361181 | 1,18 | down |
| 6198188 | 7153589 | 1259094 | similar to cullin 4A                                  | RGD1563853 | 361181 | 1,17 | up   |
| 6235734 | 7153589 | 1259091 | similar to cullin 4A                                  | RGD1563853 | 361181 | 1,06 | up   |
| 6282035 | 7153589 | 1259072 | similar to cullin 4A                                  | RGD1563853 | 361181 | 1,12 | down |
| 6422785 | 7153589 | 1259088 | similar to cullin 4A                                  | RGD1563853 | 361181 | 1,11 | up   |
| 6439289 | 7153589 | 1259087 | similar to cullin 4A                                  | RGD1563853 | 361181 | 1,34 | down |
| 6580425 | 7153589 | 1259076 | similar to cullin 4A                                  | RGD1563853 | 361181 | 1,19 | up   |
| 6594796 | 7153589 | 1259077 | similar to cullin 4A                                  | RGD1563853 | 361181 | 1,03 | down |
| 6625539 | 7153589 | 1259080 | similar to cullin 4A                                  | RGD1563853 | 361181 | 1,30 | up   |
| 6712109 | 7153589 | 1259091 | similar to cullin 4A                                  | RGD1563853 | 361181 | 1,41 | up   |
| 6722902 | 7153589 | 1259082 | similar to cullin 4A                                  | RGD1563853 | 361181 | 1,07 | down |
| 5628187 | 7374790 | 1808772 | similar to CXORF15                                    | LOC302680  | 302680 | 1,06 | down |
| 5714237 | 7374790 | 1808769 | similar to CXORF15                                    | LOC302680  | 302680 | 1,41 | up   |
| 5819511 | 7374790 | 1808770 | similar to CXORF15                                    | LOC302680  | 302680 | 1,63 | up   |
| 5842420 | 7374790 | 1808769 | similar to CXORF15                                    | LOC302680  | 302680 | 1,01 | down |
| 6024574 | 7374790 | 1808773 | similar to CXORF15                                    | LOC302680  | 302680 | 1,59 | down |
| 6095498 | 7374790 | 1808769 | similar to CXORF15                                    | LOC302680  | 302680 | 1,03 | up   |
| 6229013 | 7374790 | 1808776 | similar to CXORF15                                    | LOC302680  | 302680 | 1,11 | down |
| 6483884 | 7374790 | 1808771 | similar to CXORF15                                    | LOC302680  | 302680 | 2,05 | up   |
| 6504659 | 7374790 | 1808772 | similar to CXORF15                                    | LOC302680  | 302680 | 1,14 | up   |
| 6553449 | 7374790 | 1808774 | similar to CXORF15                                    | LOC302680  | 302680 | 1,44 | up   |
| 6739964 | 7374790 | 1808775 | similar to CXORF15                                    | LOC302680  | 302680 | 1,05 | up   |
| 5712887 | 7358053 | 1764843 | similar to D1Ert622e protein                          | RGD1562136 | 501195 | 2,40 | up   |
| 5838548 | 7358053 | 1764835 | similar to D1Ert622e protein                          | RGD1562136 | 501195 | 1,66 | down |
| 5866647 | 7358053 | 1764844 | similar to D1Ert622e protein                          | RGD1562136 | 501195 | 1,69 | up   |
| 6270420 | 7358053 | 1764843 | similar to D1Ert622e protein                          | RGD1562136 | 501195 | 1,27 | up   |
| 6425320 | 7358053 | 1764838 | similar to D1Ert622e protein                          | RGD1562136 | 501195 | 1,25 | up   |
| 6644009 | 7358053 | 1764835 | similar to D1Ert622e protein                          | RGD1562136 | 501195 | 1,16 | up   |
| 5934406 | 7358048 | 1764810 | similar to D330021B20 protein                         | RGD1308143 | 316685 | 1,03 | down |
| 5989140 | 7358048 | 1764818 | similar to D330021B20 protein                         | RGD1308143 | 316685 | 1,19 | down |
| 6042530 | 7358048 | 1764821 | similar to D330021B20 protein                         | RGD1308143 | 316685 | 1,28 | down |
| 6052241 | 7358048 | 1764814 | similar to D330021B20 protein                         | RGD1308143 | 316685 | 1,00 | down |
| 6319859 | 7358048 | 1764819 | similar to D330021B20 protein                         | RGD1308143 | 316685 | 1,16 | up   |

|         |         |         |                                                                                                                          |               |        |      |      |
|---------|---------|---------|--------------------------------------------------------------------------------------------------------------------------|---------------|--------|------|------|
| 6649730 | 7358048 | 1764821 | similar to D330021B20 protein                                                                                            | RGD1308143    | 316685 | 1,01 | up   |
| 5628825 | 7140946 | 1228311 | similar to Dachshund homolog 1 (Dach1)                                                                                   | LOC306096     | 306096 | 1,05 | down |
| 5654658 | 7140946 | 1228279 | similar to Dachshund homolog 1 (Dach1)                                                                                   | LOC306096     | 306096 | 1,56 | down |
| 5675867 | 7140946 | 1228286 | similar to Dachshund homolog 1 (Dach1)                                                                                   | LOC306096     | 306096 | 1,09 | up   |
| 5730657 | 7140946 | 1228285 | similar to Dachshund homolog 1 (Dach1)                                                                                   | LOC306096     | 306096 | 1,18 | up   |
| 5763344 | 7140946 | 1228298 | similar to Dachshund homolog 1 (Dach1)                                                                                   | LOC306096     | 306096 | 1,15 | down |
| 5835623 | 7140946 | 1228301 | similar to Dachshund homolog 1 (Dach1)                                                                                   | LOC306096     | 306096 | 1,30 | up   |
| 6134618 | 7140946 | 1228322 | similar to Dachshund homolog 1 (Dach1)                                                                                   | LOC306096     | 306096 | 1,06 | up   |
| 6267950 | 7140946 | 1228279 | similar to Dachshund homolog 1 (Dach1)                                                                                   | LOC306096     | 306096 | 1,33 | up   |
| 6333179 | 7140946 | 1228345 | similar to Dachshund homolog 1 (Dach1)                                                                                   | LOC306096     | 306096 | 1,27 | up   |
| 6499817 | 7140946 | 1228284 | similar to Dachshund homolog 1 (Dach1)                                                                                   | LOC306096     | 306096 | 2,12 | up   |
| 6603972 | 7140946 | 1228300 | similar to Dachshund homolog 1 (Dach1)                                                                                   | LOC306096     | 306096 | 1,07 | up   |
| 6623448 | 7140946 | 1228345 | similar to Dachshund homolog 1 (Dach1)                                                                                   | LOC306096     | 306096 | 1,25 | up   |
| 6655201 | 7140946 | 1228288 | similar to Dachshund homolog 1 (Dach1)                                                                                   | LOC306096     | 306096 | 1,20 | up   |
| 6667090 | 7140946 | 1228299 | similar to Dachshund homolog 1 (Dach1)                                                                                   | LOC306096     | 306096 | 1,00 | down |
| 6696299 | 7140946 | 1228279 | similar to Dachshund homolog 1 (Dach1)                                                                                   | LOC306096     | 306096 | 1,18 | down |
| 5649519 | 7037495 | 979334  | similar to deleted in malignant brain tumors 1 isoform a precursor /// similar to deE678798 /// LOC691 678798 /// 691970 | LOC691 678798 | 691970 | 1,00 | up   |
| 5694354 | 7037495 | 979342  | similar to deleted in malignant brain tumors 1 isoform a precursor /// similar to deE678798 /// LOC691 678798 /// 691970 | LOC691 678798 | 691970 | 1,06 | up   |
| 5743857 | 7037495 | 979333  | similar to deleted in malignant brain tumors 1 isoform a precursor /// similar to deE678798 /// LOC691 678798 /// 691970 | LOC691 678798 | 691970 | 1,43 | up   |
| 5749737 | 7037495 | 979320  | similar to deleted in malignant brain tumors 1 isoform a precursor /// similar to deE678798 /// LOC691 678798 /// 691970 | LOC691 678798 | 691970 | 1,02 | up   |
| 5768876 | 7037495 | 979343  | similar to deleted in malignant brain tumors 1 isoform a precursor /// similar to deE678798 /// LOC691 678798 /// 691970 | LOC691 678798 | 691970 | 1,03 | up   |
| 5893799 | 7037495 | 979343  | similar to deleted in malignant brain tumors 1 isoform a precursor /// similar to deE678798 /// LOC691 678798 /// 691970 | LOC691 678798 | 691970 | 1,18 | up   |
| 5901400 | 7037495 | 979340  | similar to deleted in malignant brain tumors 1 isoform a precursor /// similar to deE678798 /// LOC691 678798 /// 691970 | LOC691 678798 | 691970 | 1,33 | up   |
| 5954050 | 7037495 | 979341  | similar to deleted in malignant brain tumors 1 isoform a precursor /// similar to deE678798 /// LOC691 678798 /// 691970 | LOC691 678798 | 691970 | 1,26 | up   |
| 6013970 | 7037495 | 979344  | similar to deleted in malignant brain tumors 1 isoform a precursor /// similar to deE678798 /// LOC691 678798 /// 691970 | LOC691 678798 | 691970 | 1,12 | down |
| 6085160 | 7037495 | 979330  | similar to deleted in malignant brain tumors 1 isoform a precursor /// similar to deE678798 /// LOC691 678798 /// 691970 | LOC691 678798 | 691970 | 2,13 | down |
| 6105091 | 7037495 | 979335  | similar to deleted in malignant brain tumors 1 isoform a precursor /// similar to deE678798 /// LOC691 678798 /// 691970 | LOC691 678798 | 691970 | 1,05 | up   |
| 6209415 | 7037495 | 979338  | similar to deleted in malignant brain tumors 1 isoform a precursor /// similar to deE678798 /// LOC691 678798 /// 691970 | LOC691 678798 | 691970 | 1,04 | down |
| 6255166 | 7037495 | 979327  | similar to deleted in malignant brain tumors 1 isoform a precursor /// similar to deE678798 /// LOC691 678798 /// 691970 | LOC691 678798 | 691970 | 1,43 | down |
| 6327389 | 7037495 | 979329  | similar to deleted in malignant brain tumors 1 isoform a precursor /// similar to deE678798 /// LOC691 678798 /// 691970 | LOC691 678798 | 691970 | 1,09 | up   |
| 6354873 | 7037495 | 979331  | similar to deleted in malignant brain tumors 1 isoform a precursor /// similar to deE678798 /// LOC691 678798 /// 691970 | LOC691 678798 | 691970 | 1,07 | up   |
| 6363863 | 7037495 | 979332  | similar to deleted in malignant brain tumors 1 isoform a precursor /// similar to deE678798 /// LOC691 678798 /// 691970 | LOC691 678798 | 691970 | 1,01 | up   |
| 6435415 | 7037495 | 979331  | similar to deleted in malignant brain tumors 1 isoform a precursor /// similar to deE678798 /// LOC691 678798 /// 691970 | LOC691 678798 | 691970 | 1,02 | down |
| 6464645 | 7037495 | 979339  | similar to deleted in malignant brain tumors 1 isoform a precursor /// similar to deE678798 /// LOC691 678798 /// 691970 | LOC691 678798 | 691970 | 1,51 | up   |
| 6493447 | 7037495 | 979328  | similar to deleted in malignant brain tumors 1 isoform a precursor /// similar to deE678798 /// LOC691 678798 /// 691970 | LOC691 678798 | 691970 | 1,01 | up   |
| 6651538 | 7037495 | 979338  | similar to deleted in malignant brain tumors 1 isoform a precursor /// similar to deE678798 /// LOC691 678798 /// 691970 | LOC691 678798 | 691970 | 1,45 | down |
| 5849204 | 7037495 | 979315  | similar to deleted in malignant brain tumors 1 isoform c precursor                                                       | LOC691970     | 691970 | 1,26 | up   |
| 5675038 | 7188138 | 1345061 | similar to developmental endothelial locus-1 isoform b                                                                   | LOC681994     | 681994 | 1,70 | down |
| 5716565 | 7188138 | 1345043 | similar to developmental endothelial locus-1 isoform b                                                                   | LOC681994     | 681994 | 1,55 | down |
| 5951569 | 7188138 | 1345026 | similar to developmental endothelial locus-1 isoform b                                                                   | LOC681994     | 681994 | 2,13 | up   |
| 6043077 | 7188138 | 1344996 | similar to developmental endothelial locus-1 isoform b                                                                   | LOC681994     | 681994 | 1,08 | up   |
| 6078118 | 7188138 | 1345032 | similar to developmental endothelial locus-1 isoform b                                                                   | LOC681994     | 681994 | 1,01 | up   |
| 6103755 | 7188138 | 1345016 | similar to developmental endothelial locus-1 isoform b                                                                   | LOC681994     | 681994 | 1,30 | up   |
| 6223890 | 7188138 | 1344996 | similar to developmental endothelial locus-1 isoform b                                                                   | LOC681994     | 681994 | 1,34 | down |
| 6269426 | 7188138 | 1345066 | similar to developmental endothelial locus-1 isoform b                                                                   | LOC681994     | 681994 | 1,66 | down |
| 6489484 | 7188138 | 1345044 | similar to developmental endothelial locus-1 isoform b                                                                   | LOC681994     | 681994 | 1,66 | down |
| 6513815 | 7188138 | 1345013 | similar to developmental endothelial locus-1 isoform b                                                                   | LOC681994     | 681994 | 1,51 | up   |
| 6687640 | 7188138 | 1345046 | similar to developmental endothelial locus-1 isoform b                                                                   | LOC681994     | 681994 | 1,60 | down |
| 5634076 | 7081368 | 1082377 | similar to diacylglycerol kinase epsilon                                                                                 | LOC497978     | 497978 | 1,68 | down |
| 5768075 | 7081368 | 1082371 | similar to diacylglycerol kinase epsilon                                                                                 | LOC497978     | 497978 | 1,04 | up   |
| 5909925 | 7081368 | 1082375 | similar to diacylglycerol kinase epsilon                                                                                 | LOC497978     | 497978 | 1,06 | down |
| 6071243 | 7081368 | 1082376 | similar to diacylglycerol kinase epsilon                                                                                 | LOC497978     | 497978 | 1,22 | down |
| 6172451 | 7081368 | 1082381 | similar to diacylglycerol kinase epsilon                                                                                 | LOC497978     | 497978 | 1,37 | up   |
| 6185174 | 7081368 | 1082370 | similar to diacylglycerol kinase epsilon                                                                                 | LOC497978     | 497978 | 1,08 | up   |
| 6231942 | 7081368 | 1082376 | similar to diacylglycerol kinase epsilon                                                                                 | LOC497978     | 497978 | 1,17 | up   |
| 6262400 | 7081368 | 1082374 | similar to diacylglycerol kinase epsilon                                                                                 | LOC497978     | 497978 | 1,39 | down |

|         |         |         |                                                                                   |            |        |      |      |
|---------|---------|---------|-----------------------------------------------------------------------------------|------------|--------|------|------|
| 6270576 | 7081368 | 1082378 | similar to diacylglycerol kinase epsilon                                          | LOC497978  | 497978 | 1,14 | up   |
| 6364003 | 7081368 | 1082370 | similar to diacylglycerol kinase epsilon                                          | LOC497978  | 497978 | 1,53 | down |
| 6398055 | 7081368 | 1082373 | similar to diacylglycerol kinase epsilon                                          | LOC497978  | 497978 | 1,49 | down |
| 6429662 | 7081368 | 1082381 | similar to diacylglycerol kinase epsilon                                          | LOC497978  | 497978 | 2,26 | up   |
| 6644743 | 7081368 | 1082372 | similar to diacylglycerol kinase epsilon                                          | LOC497978  | 497978 | 1,09 | up   |
| 6691448 | 7368565 | 1791288 | similar to Discs large homolog 5 (Placenta and prostate DLG) (Discs large protein | LOC685908  | 685908 | 2,74 | up   |
| 6371167 | 7369938 | 1795528 | similar to Discs large homolog 5 (Placenta and prostate DLG) (Discs large protein | LOC501089  | 501089 | 1,38 | down |
| 6218349 | 7369043 | 1793107 | similar to Discs large homolog 5 (Placenta and prostate DLG) (Discs large protein | LOC689479  | 689479 | 1,37 | up   |
| 5650970 | 7338807 | 1716788 | similar to dJ202D23.2 (novel protein similar to C21ORF5 (KIAA0933))               | RGD1305534 | 315864 | 1,20 | up   |
| 5720930 | 7338807 | 1716778 | similar to dJ202D23.2 (novel protein similar to C21ORF5 (KIAA0933))               | RGD1305534 | 315864 | 1,26 | up   |
| 5758684 | 7338807 | 1716777 | similar to dJ202D23.2 (novel protein similar to C21ORF5 (KIAA0933))               | RGD1305534 | 315864 | 1,04 | up   |
| 6488551 | 7338807 | 1716830 | similar to dJ202D23.2 (novel protein similar to C21ORF5 (KIAA0933))               | RGD1305534 | 315864 | 1,97 | down |
| 5679268 | 7099517 | 1126491 | similar to ecotropic viral integration site 5-like                                | RGD1561962 | 304201 | 1,29 | up   |
| 5692086 | 7099517 | 1126504 | similar to ecotropic viral integration site 5-like                                | RGD1561962 | 304201 | 1,20 | down |
| 5755153 | 7099517 | 1126492 | similar to ecotropic viral integration site 5-like                                | RGD1561962 | 304201 | 1,14 | down |
| 5768189 | 7099517 | 1126503 | similar to ecotropic viral integration site 5-like                                | RGD1561962 | 304201 | 1,43 | down |
| 5839478 | 7099517 | 1126489 | similar to ecotropic viral integration site 5-like                                | RGD1561962 | 304201 | 1,06 | down |
| 5863374 | 7099517 | 1126487 | similar to ecotropic viral integration site 5-like                                | RGD1561962 | 304201 | 1,18 | up   |
| 5881931 | 7099517 | 1126498 | similar to ecotropic viral integration site 5-like                                | RGD1561962 | 304201 | 1,02 | down |
| 5921168 | 7099517 | 1126488 | similar to ecotropic viral integration site 5-like                                | RGD1561962 | 304201 | 1,44 | down |
| 5962202 | 7099517 | 1126488 | similar to ecotropic viral integration site 5-like                                | RGD1561962 | 304201 | 1,18 | down |
| 5972710 | 7099517 | 1126507 | similar to ecotropic viral integration site 5-like                                | RGD1561962 | 304201 | 1,08 | down |
| 6000562 | 7099517 | 1126500 | similar to ecotropic viral integration site 5-like                                | RGD1561962 | 304201 | 1,15 | up   |
| 6103708 | 7099517 | 1126494 | similar to ecotropic viral integration site 5-like                                | RGD1561962 | 304201 | 1,19 | down |
| 6141725 | 7099517 | 1126506 | similar to ecotropic viral integration site 5-like                                | RGD1561962 | 304201 | 1,24 | up   |
| 6216992 | 7099517 | 1126503 | similar to ecotropic viral integration site 5-like                                | RGD1561962 | 304201 | 1,22 | down |
| 6529372 | 7099517 | 1126487 | similar to ecotropic viral integration site 5-like                                | RGD1561962 | 304201 | 1,45 | down |
| 6556478 | 7099517 | 1126502 | similar to ecotropic viral integration site 5-like                                | RGD1561962 | 304201 | 1,40 | down |
| 6578081 | 7099517 | 1126493 | similar to ecotropic viral integration site 5-like                                | RGD1561962 | 304201 | 1,27 | up   |
| 6596354 | 7099517 | 1126501 | similar to ecotropic viral integration site 5-like                                | RGD1561962 | 304201 | 1,22 | down |
| 6630196 | 7099517 | 1126504 | similar to ecotropic viral integration site 5-like                                | RGD1561962 | 304201 | 1,03 | down |
| 6706757 | 7099517 | 1126487 | similar to ecotropic viral integration site 5-like                                | RGD1561962 | 304201 | 1,19 | down |
| 6745794 | 7099517 | 1126499 | similar to ecotropic viral integration site 5-like                                | RGD1561962 | 304201 | 1,22 | up   |
| 5646848 | 7329135 | 1693485 | similar to Epiplakin                                                              | LOC686567  | 686567 | 1,68 | up   |
| 5905188 | 7329135 | 1693485 | similar to Epiplakin                                                              | LOC686567  | 686567 | 1,29 | up   |
| 6104588 | 7329135 | 1693485 | similar to Epiplakin                                                              | LOC686567  | 686567 | 1,33 | up   |
| 6126694 | 7329135 | 1693484 | similar to Epiplakin                                                              | LOC686567  | 686567 | 1,37 | up   |
| 6193469 | 7329135 | 1693485 | similar to Epiplakin                                                              | LOC686567  | 686567 | 1,13 | down |
| 6313342 | 7329135 | 1693485 | similar to Epiplakin                                                              | LOC686567  | 686567 | 1,39 | up   |
| 6322781 | 7329135 | 1693484 | similar to Epiplakin                                                              | LOC686567  | 686567 | 2,41 | down |
| 6354489 | 7329135 | 1693485 | similar to Epiplakin                                                              | LOC686567  | 686567 | 1,00 | up   |
| 6449151 | 7329135 | 1693484 | similar to Epiplakin                                                              | LOC686567  | 686567 | 1,21 | up   |
| 6582453 | 7329135 | 1693485 | similar to Epiplakin                                                              | LOC686567  | 686567 | 1,13 | up   |
| 5883210 | 7371677 | 1800754 | similar to eukaryotic translation initiation factor 4 gamma, 2                    | LOC678831  | 678831 | 1,29 | down |
| 5889942 | 7371677 | 1800754 | similar to eukaryotic translation initiation factor 4 gamma, 2                    | LOC678831  | 678831 | 1,15 | down |
| 6470909 | 7371677 | 1800755 | similar to eukaryotic translation initiation factor 4 gamma, 2                    | LOC678831  | 678831 | 1,17 | up   |
| 6538460 | 7371677 | 1800755 | similar to eukaryotic translation initiation factor 4 gamma, 2                    | LOC678831  | 678831 | 1,02 | down |
| 5678981 | 7336449 | 1710611 | similar to expressed sequence AII18078                                            | RGD1562084 | 501002 | 1,53 | down |
| 5737910 | 7336449 | 1710631 | similar to expressed sequence AII18078                                            | RGD1562084 | 501002 | 1,18 | up   |
| 5833563 | 7336449 | 1710632 | similar to expressed sequence AII18078                                            | RGD1562084 | 501002 | 1,10 | up   |
| 5915676 | 7336449 | 1710619 | similar to expressed sequence AII18078                                            | RGD1562084 | 501002 | 1,00 | up   |
| 5937757 | 7336449 | 1710619 | similar to expressed sequence AII18078                                            | RGD1562084 | 501002 | 1,48 | down |
| 5939291 | 7336449 | 1710628 | similar to expressed sequence AII18078                                            | RGD1562084 | 501002 | 1,20 | down |
| 5968441 | 7336449 | 1710618 | similar to expressed sequence AII18078                                            | RGD1562084 | 501002 | 1,32 | up   |
| 5998123 | 7336449 | 1710620 | similar to expressed sequence AII18078                                            | RGD1562084 | 501002 | 1,27 | up   |
| 6040089 | 7336449 | 1710632 | similar to expressed sequence AII18078                                            | RGD1562084 | 501002 | 1,13 | down |

|         |         |         |                                                                                   |            |        |      |      |
|---------|---------|---------|-----------------------------------------------------------------------------------|------------|--------|------|------|
| 6040447 | 7336449 | 1710605 | similar to expressed sequence AII18078                                            | RGD1562084 | 501002 | 1,23 | down |
| 6377580 | 7336449 | 1710615 | similar to expressed sequence AII18078                                            | RGD1562084 | 501002 | 2,97 | down |
| 6407754 | 7336449 | 1710611 | similar to expressed sequence AII18078                                            | RGD1562084 | 501002 | 1,75 | down |
| 6464096 | 7336449 | 1710632 | similar to expressed sequence AII18078                                            | RGD1562084 | 501002 | 1,68 | down |
| 6707466 | 7336449 | 1710602 | similar to expressed sequence AII18078                                            | RGD1562084 | 501002 | 1,24 | up   |
| 5704752 | 7370977 | 1798761 | similar to Fatty acid-binding protein, epidermal (E-FABP) (Cutaneous fatty acid-b | LOC503340  | 503340 | 1,18 | down |
| 6542574 | 7370977 | 1798761 | similar to Fatty acid-binding protein, epidermal (E-FABP) (Cutaneous fatty acid-b | LOC503340  | 503340 | 1,77 | up   |
| 5629845 | 7030172 | 960967  | similar to F-box only protein 27                                                  | RGD1563982 | 499114 | 1,19 | down |
| 5709580 | 7030172 | 960965  | similar to F-box only protein 27                                                  | RGD1563982 | 499114 | 2,40 | up   |
| 5723039 | 7030172 | 960966  | similar to F-box only protein 27                                                  | RGD1563982 | 499114 | 1,30 | up   |
| 5724389 | 7030172 | 960965  | similar to F-box only protein 27                                                  | RGD1563982 | 499114 | 1,14 | up   |
| 5891536 | 7030172 | 960963  | similar to F-box only protein 27                                                  | RGD1563982 | 499114 | 2,74 | down |
| 6000744 | 7030172 | 960965  | similar to F-box only protein 27                                                  | RGD1563982 | 499114 | 1,29 | up   |
| 6188844 | 7030172 | 960964  | similar to F-box only protein 27                                                  | RGD1563982 | 499114 | 1,73 | down |
| 6443355 | 7030172 | 960967  | similar to F-box only protein 27                                                  | RGD1563982 | 499114 | 1,35 | up   |
| 6620247 | 7030172 | 960964  | similar to F-box only protein 27                                                  | RGD1563982 | 499114 | 2,38 | down |
| 6627281 | 7030172 | 960964  | similar to F-box only protein 27                                                  | RGD1563982 | 499114 | 1,22 | up   |
| 6645648 | 7030172 | 960967  | similar to F-box only protein 27                                                  | RGD1563982 | 499114 | 1,21 | up   |
| 6156166 | 7131360 | 1204992 | similar to FLJ00128 protein                                                       | RGD1308093 | 361034 | 2,72 | up   |
| 6437492 | 7131360 | 1204993 | similar to FLJ00128 protein                                                       | RGD1308093 | 361034 | 1,46 | down |
| 6470816 | 7131360 | 1204992 | similar to FLJ00128 protein                                                       | RGD1308093 | 361034 | 1,20 | down |
| 6553687 | 7131360 | 1204992 | similar to FLJ00128 protein                                                       | RGD1308093 | 361034 | 1,02 | down |
| 6733424 | 7131360 | 1204965 | similar to FLJ00128 protein                                                       | RGD1308093 | 361034 | 1,02 | down |
| 5628667 | 7328833 | 1692810 | similar to FLJ43860 protein                                                       | RGD1559695 | 500889 | 1,09 | up   |
| 5631458 | 7328833 | 1692803 | similar to FLJ43860 protein                                                       | RGD1559695 | 500889 | 1,03 | up   |
| 5687481 | 7328833 | 1692788 | similar to FLJ43860 protein                                                       | RGD1559695 | 500889 | 1,39 | down |
| 5716397 | 7328833 | 1692800 | similar to FLJ43860 protein                                                       | RGD1559695 | 500889 | 1,18 | up   |
| 5782151 | 7328833 | 1692789 | similar to FLJ43860 protein                                                       | RGD1559695 | 500889 | 1,33 | down |
| 5786190 | 7328833 | 1692791 | similar to FLJ43860 protein                                                       | RGD1559695 | 500889 | 1,37 | up   |
| 5803884 | 7328833 | 1692778 | similar to FLJ43860 protein                                                       | RGD1559695 | 500889 | 1,03 | down |
| 5816379 | 7328833 | 1692796 | similar to FLJ43860 protein                                                       | RGD1559695 | 500889 | 1,05 | up   |
| 5818495 | 7328833 | 1692777 | similar to FLJ43860 protein                                                       | RGD1559695 | 500889 | 2,16 | down |
| 5873980 | 7328833 | 1692780 | similar to FLJ43860 protein                                                       | RGD1559695 | 500889 | 1,01 | up   |
| 5881939 | 7328833 | 1692805 | similar to FLJ43860 protein                                                       | RGD1559695 | 500889 | 1,64 | down |
| 5893165 | 7328833 | 1692776 | similar to FLJ43860 protein                                                       | RGD1559695 | 500889 | 1,13 | up   |
| 5906576 | 7328833 | 1692809 | similar to FLJ43860 protein                                                       | RGD1559695 | 500889 | 1,06 | up   |
| 5969306 | 7328833 | 1692797 | similar to FLJ43860 protein                                                       | RGD1559695 | 500889 | 1,05 | down |
| 6076748 | 7328833 | 1692787 | similar to FLJ43860 protein                                                       | RGD1559695 | 500889 | 1,09 | up   |
| 6125330 | 7328833 | 1692781 | similar to FLJ43860 protein                                                       | RGD1559695 | 500889 | 1,46 | up   |
| 6135842 | 7328833 | 1692775 | similar to FLJ43860 protein                                                       | RGD1559695 | 500889 | 1,06 | down |
| 6211645 | 7328833 | 1692813 | similar to FLJ43860 protein                                                       | RGD1559695 | 500889 | 1,25 | up   |
| 6224458 | 7328833 | 1692786 | similar to FLJ43860 protein                                                       | RGD1559695 | 500889 | 1,02 | up   |
| 6243025 | 7328833 | 1692782 | similar to FLJ43860 protein                                                       | RGD1559695 | 500889 | 1,04 | down |
| 6300859 | 7328833 | 1692790 | similar to FLJ43860 protein                                                       | RGD1559695 | 500889 | 1,12 | up   |
| 6302217 | 7328833 | 1692808 | similar to FLJ43860 protein                                                       | RGD1559695 | 500889 | 1,04 | down |
| 6317888 | 7328833 | 1692792 | similar to FLJ43860 protein                                                       | RGD1559695 | 500889 | 1,31 | up   |
| 6362864 | 7328833 | 1692788 | similar to FLJ43860 protein                                                       | RGD1559695 | 500889 | 1,27 | down |
| 6392063 | 7328833 | 1692783 | similar to FLJ43860 protein                                                       | RGD1559695 | 500889 | 1,05 | down |
| 6417580 | 7328833 | 1692805 | similar to FLJ43860 protein                                                       | RGD1559695 | 500889 | 1,15 | down |
| 6468626 | 7328833 | 1692773 | similar to FLJ43860 protein                                                       | RGD1559695 | 500889 | 1,06 | down |
| 6508616 | 7328833 | 1692801 | similar to FLJ43860 protein                                                       | RGD1559695 | 500889 | 1,95 | up   |
| 6565445 | 7328833 | 1692774 | similar to FLJ43860 protein                                                       | RGD1559695 | 500889 | 1,06 | down |
| 6588125 | 7328833 | 1692798 | similar to FLJ43860 protein                                                       | RGD1559695 | 500889 | 1,18 | up   |
| 6602446 | 7328833 | 1692810 | similar to FLJ43860 protein                                                       | RGD1559695 | 500889 | 1,21 | down |
| 6611536 | 7328833 | 1692794 | similar to FLJ43860 protein                                                       | RGD1559695 | 500889 | 2,33 | up   |
| 6684200 | 7328833 | 1692799 | similar to FLJ43860 protein                                                       | RGD1559695 | 500889 | 1,12 | up   |

|         |         |         |                                                                                                       |                   |                   |      |      |
|---------|---------|---------|-------------------------------------------------------------------------------------------------------|-------------------|-------------------|------|------|
| 6733250 | 7328833 | 1692802 | similar to FLJ43860 protein                                                                           | RGD1559695        | 500889            | 1,50 | down |
| 6371534 | 7231203 | 1450420 | similar to formin                                                                                     | RGD1306349        | 296512            | 1,90 | down |
| 6619428 | 7231203 | 1450403 | similar to Formin-1 isoform IV (Limb deformity protein) /// similar to formin                         | 687921 /// RGD130 | 687921 /// 296512 | 1,14 | up   |
| 5625925 | 7226812 | 1439359 | similar to G protein-coupled receptor 144                                                             | RGD1564139        | 366034            | 3,41 | up   |
| 5967750 | 7226812 | 1439355 | similar to G protein-coupled receptor 144                                                             | RGD1564139        | 366034            | 1,18 | down |
| 5998175 | 7226812 | 1439353 | similar to G protein-coupled receptor 144                                                             | RGD1564139        | 366034            | 1,11 | down |
| 6051790 | 7226812 | 1439354 | similar to G protein-coupled receptor 144                                                             | RGD1564139        | 366034            | 2,01 | up   |
| 6251462 | 7226812 | 1439359 | similar to G protein-coupled receptor 144                                                             | RGD1564139        | 366034            | 1,20 | down |
| 6383622 | 7226812 | 1439356 | similar to G protein-coupled receptor 144                                                             | RGD1564139        | 366034            | 1,16 | up   |
| 6633568 | 7226812 | 1439357 | similar to G protein-coupled receptor 144                                                             | RGD1564139        | 366034            | 1,17 | up   |
| 6697166 | 7226812 | 1439351 | similar to G protein-coupled receptor 144                                                             | RGD1564139        | 366034            | 1,19 | down |
| 5701856 | 7107321 | 1145327 | similar to G protein-coupled receptor 161                                                             | RGD1563245        | 289180            | 2,10 | up   |
| 5712239 | 7107321 | 1145322 | similar to G protein-coupled receptor 161                                                             | RGD1563245        | 289180            | 1,29 | down |
| 5871239 | 7107321 | 1145322 | similar to G protein-coupled receptor 161                                                             | RGD1563245        | 289180            | 2,07 | down |
| 6263459 | 7107321 | 1145325 | similar to G protein-coupled receptor 161                                                             | RGD1563245        | 289180            | 1,29 | down |
| 6274657 | 7107321 | 1145326 | similar to G protein-coupled receptor 161                                                             | RGD1563245        | 289180            | 1,07 | up   |
| 6283450 | 7107321 | 1145325 | similar to G protein-coupled receptor 161                                                             | RGD1563245        | 289180            | 1,12 | down |
| 6567263 | 7107321 | 1145327 | similar to G protein-coupled receptor 161                                                             | RGD1563245        | 289180            | 1,26 | up   |
| 5670691 | 7294221 | 1606737 | similar to Glutaminy-peptide cyclotransferase precursor (QC)                                          | RGD1562284        | 313837            | 1,11 | down |
| 5707529 | 7294221 | 1606739 | similar to Glutaminy-peptide cyclotransferase precursor (QC)                                          | RGD1562284        | 313837            | 1,75 | up   |
| 5900709 | 7294221 | 1606736 | similar to Glutaminy-peptide cyclotransferase precursor (QC)                                          | RGD1562284        | 313837            | 1,28 | down |
| 5974398 | 7294221 | 1606738 | similar to Glutaminy-peptide cyclotransferase precursor (QC)                                          | RGD1562284        | 313837            | 1,00 | down |
| 6357738 | 7294221 | 1606731 | similar to Glutaminy-peptide cyclotransferase precursor (QC)                                          | RGD1562284        | 313837            | 1,22 | down |
| 6368404 | 7294221 | 1606731 | similar to Glutaminy-peptide cyclotransferase precursor (QC)                                          | RGD1562284        | 313837            | 1,03 | down |
| 6478142 | 7294221 | 1606731 | similar to Glutaminy-peptide cyclotransferase precursor (QC)                                          | RGD1562284        | 313837            | 2,33 | down |
| 6638749 | 7294221 | 1606735 | similar to Glutaminy-peptide cyclotransferase precursor (QC)                                          | RGD1562284        | 313837            | 1,25 | up   |
| 6655016 | 7294221 | 1606739 | similar to Glutaminy-peptide cyclotransferase precursor (QC)                                          | RGD1562284        | 313837            | 1,50 | down |
| 5784008 | 7368912 | 1792635 | similar to glutaredoxin 1 (thioltransferase); glutaredoxin                                            | LOC305806         | 305806            | 1,09 | down |
| 6420302 | 7368912 | 1792635 | similar to glutaredoxin 1 (thioltransferase); glutaredoxin                                            | LOC305806         | 305806            | 1,36 | down |
| 5680259 | 7368912 | 1792635 | similar to glutaredoxin 1 (thioltransferase); glutaredoxin /// similar to RIKEN cDN:305806 /// LOC290 | 305806 /// 290508 | 305806 /// 290508 | 1,14 | down |
| 5919161 | 7371539 | 1800299 | similar to glutaredoxin 1 (thioltransferase); glutaredoxin /// similar to RIKEN cDN:305806 /// LOC290 | 305806 /// 290508 | 305806 /// 290508 | 1,00 | up   |
| 5959041 | 7368912 | 1792635 | similar to glutaredoxin 1 (thioltransferase); glutaredoxin /// similar to RIKEN cDN:305806 /// LOC290 | 305806 /// 290508 | 305806 /// 290508 | 3,40 | down |
| 5969872 | 7371539 | 1800299 | similar to glutaredoxin 1 (thioltransferase); glutaredoxin /// similar to RIKEN cDN:305806 /// LOC290 | 305806 /// 290508 | 305806 /// 290508 | 2,36 | down |
| 5984377 | 7368912 | 1792635 | similar to glutaredoxin 1 (thioltransferase); glutaredoxin /// similar to RIKEN cDN:305806 /// LOC290 | 305806 /// 290508 | 305806 /// 290508 | 1,13 | down |
| 6020950 | 7371539 | 1800299 | similar to glutaredoxin 1 (thioltransferase); glutaredoxin /// similar to RIKEN cDN:305806 /// LOC290 | 305806 /// 290508 | 305806 /// 290508 | 1,36 | up   |
| 6117571 | 7368912 | 1792635 | similar to glutaredoxin 1 (thioltransferase); glutaredoxin /// similar to RIKEN cDN:305806 /// LOC290 | 305806 /// 290508 | 305806 /// 290508 | 5,61 | down |
| 6176124 | 7368912 | 1792634 | similar to glutaredoxin 1 (thioltransferase); glutaredoxin /// similar to RIKEN cDN:305806 /// LOC290 | 305806 /// 290508 | 305806 /// 290508 | 1,30 | up   |
| 6203880 | 7371539 | 1800300 | similar to glutaredoxin 1 (thioltransferase); glutaredoxin /// similar to RIKEN cDN:305806 /// LOC290 | 305806 /// 290508 | 305806 /// 290508 | 1,01 | up   |
| 6356241 | 7371539 | 1800299 | similar to glutaredoxin 1 (thioltransferase); glutaredoxin /// similar to RIKEN cDN:305806 /// LOC290 | 305806 /// 290508 | 305806 /// 290508 | 1,19 | up   |
| 6541266 | 7368912 | 1792633 | similar to glutaredoxin 1 (thioltransferase); glutaredoxin /// similar to RIKEN cDN:305806 /// LOC290 | 305806 /// 290508 | 305806 /// 290508 | 1,33 | up   |
| 6630461 | 7371539 | 1800299 | similar to glutaredoxin 1 (thioltransferase); glutaredoxin /// similar to RIKEN cDN:305806 /// LOC290 | 305806 /// 290508 | 305806 /// 290508 | 1,16 | up   |
| 5622867 | 7370412 | 1796825 | similar to gonadotropin-regulated long chain acyl-CoA synthetase                                      | LOC316124         | 316124            | 1,13 | down |
| 5865919 | 7370412 | 1796827 | similar to gonadotropin-regulated long chain acyl-CoA synthetase                                      | LOC316124         | 316124            | 1,16 | up   |
| 6021394 | 7370412 | 1796831 | similar to gonadotropin-regulated long chain acyl-CoA synthetase                                      | LOC316124         | 316124            | 1,23 | down |
| 6104489 | 7370412 | 1796830 | similar to gonadotropin-regulated long chain acyl-CoA synthetase                                      | LOC316124         | 316124            | 1,07 | down |
| 6108580 | 7370412 | 1796829 | similar to gonadotropin-regulated long chain acyl-CoA synthetase                                      | LOC316124         | 316124            | 1,01 | down |
| 6208547 | 7370412 | 1796822 | similar to gonadotropin-regulated long chain acyl-CoA synthetase                                      | LOC316124         | 316124            | 1,43 | up   |
| 6233835 | 7370412 | 1796839 | similar to gonadotropin-regulated long chain acyl-CoA synthetase                                      | LOC316124         | 316124            | 2,00 | down |
| 6352528 | 7370412 | 1796834 | similar to gonadotropin-regulated long chain acyl-CoA synthetase                                      | LOC316124         | 316124            | 1,46 | up   |
| 6447325 | 7370412 | 1796826 | similar to gonadotropin-regulated long chain acyl-CoA synthetase                                      | LOC316124         | 316124            | 1,05 | up   |
| 6518184 | 7370412 | 1796824 | similar to gonadotropin-regulated long chain acyl-CoA synthetase                                      | LOC316124         | 316124            | 1,14 | down |
| 6563606 | 7370412 | 1796823 | similar to gonadotropin-regulated long chain acyl-CoA synthetase                                      | LOC316124         | 316124            | 1,01 | up   |
| 6600827 | 7370412 | 1796824 | similar to gonadotropin-regulated long chain acyl-CoA synthetase                                      | LOC316124         | 316124            | 1,36 | down |
| 6606380 | 7370412 | 1796837 | similar to gonadotropin-regulated long chain acyl-CoA synthetase                                      | LOC316124         | 316124            | 1,30 | down |
| 6678659 | 7370412 | 1796836 | similar to gonadotropin-regulated long chain acyl-CoA synthetase                                      | LOC316124         | 316124            | 2,02 | up   |
| 6690331 | 7370412 | 1796829 | similar to gonadotropin-regulated long chain acyl-CoA synthetase                                      | LOC316124         | 316124            | 1,00 | up   |

|         |         |         |                                                                     |            |        |      |      |
|---------|---------|---------|---------------------------------------------------------------------|------------|--------|------|------|
| 6725398 | 7370412 | 1796832 | similar to gonadotropin-regulated long chain acyl-CoA synthetase    | LOC316124  | 316124 | 1,43 | down |
| 6316758 | 7116614 | 1168778 | similar to GPI-gamma 4; GPIgamma4                                   | RGD1562220 | 305185 | 1,05 | down |
| 5645929 | 7237711 | 1467423 | similar to GTPase activating RANGAP domain-like 3                   | RGD1564019 | 499783 | 1,01 | down |
| 5653961 | 7237711 | 1467451 | similar to GTPase activating RANGAP domain-like 3                   | RGD1564019 | 499783 | 1,03 | up   |
| 5668926 | 7237711 | 1467452 | similar to GTPase activating RANGAP domain-like 3                   | RGD1564019 | 499783 | 1,14 | up   |
| 5708488 | 7237711 | 1467449 | similar to GTPase activating RANGAP domain-like 3                   | RGD1564019 | 499783 | 1,89 | up   |
| 5788107 | 7237711 | 1467423 | similar to GTPase activating RANGAP domain-like 3                   | RGD1564019 | 499783 | 1,00 | down |
| 5791366 | 7237711 | 1467434 | similar to GTPase activating RANGAP domain-like 3                   | RGD1564019 | 499783 | 1,03 | down |
| 5800986 | 7237711 | 1467437 | similar to GTPase activating RANGAP domain-like 3                   | RGD1564019 | 499783 | 1,58 | up   |
| 5812129 | 7237711 | 1467427 | similar to GTPase activating RANGAP domain-like 3                   | RGD1564019 | 499783 | 1,92 | down |
| 5843042 | 7237711 | 1467442 | similar to GTPase activating RANGAP domain-like 3                   | RGD1564019 | 499783 | 1,34 | down |
| 5848598 | 7237711 | 1467449 | similar to GTPase activating RANGAP domain-like 3                   | RGD1564019 | 499783 | 1,31 | up   |
| 5875156 | 7237711 | 1467423 | similar to GTPase activating RANGAP domain-like 3                   | RGD1564019 | 499783 | 1,00 | up   |
| 5892801 | 7237711 | 1467458 | similar to GTPase activating RANGAP domain-like 3                   | RGD1564019 | 499783 | 1,20 | up   |
| 5917659 | 7237711 | 1467435 | similar to GTPase activating RANGAP domain-like 3                   | RGD1564019 | 499783 | 1,24 | down |
| 5996069 | 7237711 | 1467455 | similar to GTPase activating RANGAP domain-like 3                   | RGD1564019 | 499783 | 1,07 | up   |
| 6012658 | 7237711 | 1467428 | similar to GTPase activating RANGAP domain-like 3                   | RGD1564019 | 499783 | 1,23 | up   |
| 6018448 | 7237711 | 1467448 | similar to GTPase activating RANGAP domain-like 3                   | RGD1564019 | 499783 | 1,89 | down |
| 6021919 | 7237711 | 1467457 | similar to GTPase activating RANGAP domain-like 3                   | RGD1564019 | 499783 | 1,49 | up   |
| 6036993 | 7237711 | 1467433 | similar to GTPase activating RANGAP domain-like 3                   | RGD1564019 | 499783 | 1,01 | up   |
| 6043380 | 7237711 | 1467425 | similar to GTPase activating RANGAP domain-like 3                   | RGD1564019 | 499783 | 1,09 | up   |
| 6157735 | 7237711 | 1467443 | similar to GTPase activating RANGAP domain-like 3                   | RGD1564019 | 499783 | 2,65 | up   |
| 6284010 | 7237711 | 1467463 | similar to GTPase activating RANGAP domain-like 3                   | RGD1564019 | 499783 | 1,10 | down |
| 6310624 | 7237711 | 1467446 | similar to GTPase activating RANGAP domain-like 3                   | RGD1564019 | 499783 | 1,59 | up   |
| 6317594 | 7237711 | 1467442 | similar to GTPase activating RANGAP domain-like 3                   | RGD1564019 | 499783 | 1,41 | down |
| 6372103 | 7237711 | 1467424 | similar to GTPase activating RANGAP domain-like 3                   | RGD1564019 | 499783 | 1,01 | up   |
| 6397645 | 7237711 | 1467464 | similar to GTPase activating RANGAP domain-like 3                   | RGD1564019 | 499783 | 1,22 | down |
| 6422652 | 7237711 | 1467426 | similar to GTPase activating RANGAP domain-like 3                   | RGD1564019 | 499783 | 1,42 | up   |
| 6461022 | 7237711 | 1467429 | similar to GTPase activating RANGAP domain-like 3                   | RGD1564019 | 499783 | 1,68 | down |
| 6552513 | 7237711 | 1467431 | similar to GTPase activating RANGAP domain-like 3                   | RGD1564019 | 499783 | 1,20 | up   |
| 6574499 | 7237711 | 1467450 | similar to GTPase activating RANGAP domain-like 3                   | RGD1564019 | 499783 | 1,45 | up   |
| 6693479 | 7237711 | 1467445 | similar to GTPase activating RANGAP domain-like 3                   | RGD1564019 | 499783 | 1,22 | up   |
| 5658775 | 7200129 | 1375992 | similar to guanylate binding protein 1, interferon-inducible, 67kDa | RGD1561239 | 304267 | 1,60 | down |
| 6162221 | 7200129 | 1375993 | similar to guanylate binding protein 1, interferon-inducible, 67kDa | RGD1561239 | 304267 | 3,00 | up   |
| 6277229 | 7200129 | 1375991 | similar to guanylate binding protein 1, interferon-inducible, 67kDa | RGD1561239 | 304267 | 1,06 | up   |
| 5665670 | 7234434 | 1459436 | similar to Hepatocellular carcinoma-associated antigen 58 homolog   | RGD1305020 | 311575 | 1,14 | up   |
| 5765926 | 7234434 | 1459417 | similar to Hepatocellular carcinoma-associated antigen 58 homolog   | RGD1305020 | 311575 | 1,36 | down |
| 5832234 | 7234434 | 1459441 | similar to Hepatocellular carcinoma-associated antigen 58 homolog   | RGD1305020 | 311575 | 1,08 | down |
| 5959569 | 7234434 | 1459428 | similar to Hepatocellular carcinoma-associated antigen 58 homolog   | RGD1305020 | 311575 | 2,05 | down |
| 6022562 | 7234434 | 1459433 | similar to Hepatocellular carcinoma-associated antigen 58 homolog   | RGD1305020 | 311575 | 1,33 | down |
| 6043789 | 7234434 | 1459442 | similar to Hepatocellular carcinoma-associated antigen 58 homolog   | RGD1305020 | 311575 | 1,09 | up   |
| 6094802 | 7234434 | 1459422 | similar to Hepatocellular carcinoma-associated antigen 58 homolog   | RGD1305020 | 311575 | 1,11 | up   |
| 6238536 | 7234434 | 1459430 | similar to Hepatocellular carcinoma-associated antigen 58 homolog   | RGD1305020 | 311575 | 1,13 | up   |
| 6238561 | 7234434 | 1459426 | similar to Hepatocellular carcinoma-associated antigen 58 homolog   | RGD1305020 | 311575 | 1,12 | down |
| 6257085 | 7234434 | 1459429 | similar to Hepatocellular carcinoma-associated antigen 58 homolog   | RGD1305020 | 311575 | 1,21 | down |
| 6280151 | 7234434 | 1459437 | similar to Hepatocellular carcinoma-associated antigen 58 homolog   | RGD1305020 | 311575 | 1,52 | up   |
| 6328296 | 7234434 | 1459438 | similar to Hepatocellular carcinoma-associated antigen 58 homolog   | RGD1305020 | 311575 | 1,00 | down |
| 6442002 | 7234434 | 1459442 | similar to Hepatocellular carcinoma-associated antigen 58 homolog   | RGD1305020 | 311575 | 1,12 | up   |
| 6609629 | 7234434 | 1459433 | similar to Hepatocellular carcinoma-associated antigen 58 homolog   | RGD1305020 | 311575 | 1,06 | down |
| 6631453 | 7234434 | 1459427 | similar to Hepatocellular carcinoma-associated antigen 58 homolog   | RGD1305020 | 311575 | 1,13 | down |
| 6640665 | 7234434 | 1459431 | similar to Hepatocellular carcinoma-associated antigen 58 homolog   | RGD1305020 | 311575 | 1,11 | down |
| 6672359 | 7234434 | 1459435 | similar to Hepatocellular carcinoma-associated antigen 58 homolog   | RGD1305020 | 311575 | 1,06 | up   |
| 6677305 | 7234434 | 1459438 | similar to Hepatocellular carcinoma-associated antigen 58 homolog   | RGD1305020 | 311575 | 1,06 | down |
| 6696881 | 7234434 | 1459424 | similar to Hepatocellular carcinoma-associated antigen 58 homolog   | RGD1305020 | 311575 | 1,12 | up   |
| 6700261 | 7234434 | 1459432 | similar to Hepatocellular carcinoma-associated antigen 58 homolog   | RGD1305020 | 311575 | 1,14 | down |
| 6728469 | 7234434 | 1459420 | similar to Hepatocellular carcinoma-associated antigen 58 homolog   | RGD1305020 | 311575 | 1,31 | up   |

|         |         |         |                                                     |            |        |      |      |
|---------|---------|---------|-----------------------------------------------------|------------|--------|------|------|
| 5827770 | 7197076 | 1367887 | similar to histone protein Hist2h3c1                | RGD1563516 | 690148 | 1,32 | down |
| 6142932 | 7197076 | 1367887 | similar to histone protein Hist2h3c1                | RGD1563516 | 690148 | 2,07 | down |
| 6150049 | 7197076 | 1367888 | similar to histone protein Hist2h3c1                | RGD1563516 | 690148 | 1,49 | up   |
| 5628431 | 7264797 | 1534438 | similar to homeobox-containing transcription factor | RGD1561431 | 500125 | 1,66 | down |
| 6123141 | 7158408 | 1271349 | similar to HS1 binding protein                      | LOC679116  | 679116 | 1,17 | up   |
| 5623954 | 7173846 | 1309615 | similar to hypothetical protein                     | RGD1310571 | 361301 | 1,22 | down |
| 5698983 | 7130889 | 1203878 | similar to hypothetical protein                     | RGD1563070 | 305812 | 1,07 | up   |
| 5700329 | 7173846 | 1309613 | similar to hypothetical protein                     | RGD1310571 | 361301 | 2,27 | down |
| 5790757 | 7074896 | 1068120 | similar to hypothetical protein                     | LOC360479  | 360479 | 1,46 | down |
| 5825648 | 7173846 | 1309618 | similar to hypothetical protein                     | RGD1310571 | 361301 | 1,23 | up   |
| 5851062 | 7276650 | 1564155 | similar to hypothetical protein                     | RGD1309931 | 362538 | 1,07 | down |
| 5881556 | 7074896 | 1068119 | similar to hypothetical protein                     | LOC360479  | 360479 | 1,03 | down |
| 5893632 | 7173846 | 1309614 | similar to hypothetical protein                     | RGD1310571 | 361301 | 1,14 | down |
| 5899458 | 7088489 | 1099530 | similar to hypothetical protein                     | RGD1305539 | 303920 | 1,05 | up   |
| 5905004 | 7276650 | 1564162 | similar to hypothetical protein                     | RGD1309931 | 362538 | 1,71 | down |
| 5914327 | 7074896 | 1068116 | similar to hypothetical protein                     | LOC360479  | 360479 | 1,41 | up   |
| 5922822 | 7088489 | 1099530 | similar to hypothetical protein                     | RGD1305539 | 303920 | 1,00 | down |
| 6036407 | 7130889 | 1203865 | similar to hypothetical protein                     | RGD1563070 | 305812 | 1,21 | down |
| 6040799 | 7276650 | 1564109 | similar to hypothetical protein                     | RGD1309931 | 362538 | 1,02 | down |
| 6056160 | 7074896 | 1068119 | similar to hypothetical protein                     | LOC360479  | 360479 | 1,33 | up   |
| 6092154 | 7074896 | 1068117 | similar to hypothetical protein                     | LOC360479  | 360479 | 1,18 | down |
| 6126549 | 7254040 | 1507613 | similar to hypothetical protein                     | RGD1562590 | 312365 | 2,25 | down |
| 6142310 | 7173846 | 1309613 | similar to hypothetical protein                     | RGD1310571 | 361301 | 1,33 | down |
| 6190395 | 7074896 | 1068114 | similar to hypothetical protein                     | LOC360479  | 360479 | 1,02 | down |
| 6191599 | 7074896 | 1068115 | similar to hypothetical protein                     | LOC360479  | 360479 | 2,18 | down |
| 6207816 | 7074896 | 1068121 | similar to hypothetical protein                     | LOC360479  | 360479 | 1,14 | up   |
| 6292139 | 7130889 | 1203870 | similar to hypothetical protein                     | RGD1563070 | 305812 | 2,48 | down |
| 6322048 | 7130889 | 1203881 | similar to hypothetical protein                     | RGD1563070 | 305812 | 1,05 | down |
| 6328298 | 7130889 | 1203881 | similar to hypothetical protein                     | RGD1563070 | 305812 | 1,09 | down |
| 6336853 | 7173846 | 1309613 | similar to hypothetical protein                     | RGD1310571 | 361301 | 1,81 | down |
| 6369961 | 7173846 | 1309617 | similar to hypothetical protein                     | RGD1310571 | 361301 | 1,38 | up   |
| 6413982 | 7130889 | 1203864 | similar to hypothetical protein                     | RGD1563070 | 305812 | 1,07 | down |
| 6435943 | 7254040 | 1507575 | similar to hypothetical protein                     | RGD1562590 | 312365 | 1,54 | down |
| 6465312 | 7130889 | 1203869 | similar to hypothetical protein                     | RGD1563070 | 305812 | 1,19 | down |
| 6479417 | 7173846 | 1309616 | similar to hypothetical protein                     | RGD1310571 | 361301 | 1,01 | up   |
| 6563737 | 7130889 | 1203879 | similar to hypothetical protein                     | RGD1563070 | 305812 | 1,09 | up   |
| 6564728 | 7173846 | 1309617 | similar to hypothetical protein                     | RGD1310571 | 361301 | 1,11 | up   |
| 6574274 | 7254040 | 1507575 | similar to hypothetical protein                     | RGD1562590 | 312365 | 1,10 | down |
| 6583674 | 7173846 | 1309613 | similar to hypothetical protein                     | RGD1310571 | 361301 | 1,07 | down |
| 6584263 | 7074896 | 1068118 | similar to hypothetical protein                     | LOC360479  | 360479 | 1,00 | up   |
| 6613971 | 7173846 | 1309613 | similar to hypothetical protein                     | RGD1310571 | 361301 | 1,50 | up   |
| 6694045 | 7074896 | 1068117 | similar to hypothetical protein                     | LOC360479  | 360479 | 2,13 | up   |
| 6698943 | 7130889 | 1203880 | similar to hypothetical protein                     | RGD1563070 | 305812 | 1,47 | down |
| 6702934 | 7074896 | 1068113 | similar to hypothetical protein                     | LOC360479  | 360479 | 1,21 | down |
| 6746018 | 7074896 | 1068121 | similar to hypothetical protein                     | LOC360479  | 360479 | 1,08 | down |
| 5642953 | 7099156 | 1125616 | similar to hypothetical protein A530094D01          | RGD1306556 | 288744 | 2,01 | down |
| 5681587 | 7099156 | 1125621 | similar to hypothetical protein A530094D01          | RGD1306556 | 288744 | 1,05 | up   |
| 6183629 | 7099156 | 1125621 | similar to hypothetical protein A530094D01          | RGD1306556 | 288744 | 2,04 | up   |
| 5687333 | 7350993 | 1747480 | similar to hypothetical protein A730098P15          | RGD1565726 | 363167 | 1,44 | down |
| 6297628 | 7350993 | 1747481 | similar to hypothetical protein A730098P15          | RGD1565726 | 363167 | 1,11 | up   |
| 6337029 | 7350993 | 1747489 | similar to hypothetical protein A730098P15          | RGD1565726 | 363167 | 1,04 | down |
| 5625870 | 7108300 | 1147836 | similar to hypothetical protein D230039L06          | RGD1560572 | 498294 | 1,15 | up   |
| 6018445 | 7108300 | 1147862 | similar to hypothetical protein D230039L06          | RGD1560572 | 498294 | 1,02 | up   |
| 6068380 | 7108300 | 1147849 | similar to hypothetical protein D230039L06          | RGD1560572 | 498294 | 1,18 | down |
| 6237175 | 7108300 | 1147849 | similar to hypothetical protein D230039L06          | RGD1560572 | 498294 | 1,29 | up   |
| 6451210 | 7108300 | 1147835 | similar to hypothetical protein D230039L06          | RGD1560572 | 498294 | 1,25 | up   |



|         |         |         |                                            |            |        |      |      |
|---------|---------|---------|--------------------------------------------|------------|--------|------|------|
| 6527142 | 7108300 | 1147862 | similar to hypothetical protein D230039L06 | RGD1560572 | 498294 | 1,04 | down |
| 6594325 | 7108300 | 1147849 | similar to hypothetical protein D230039L06 | RGD1560572 | 498294 | 1,26 | up   |
| 5618916 | 7113339 | 1160719 | similar to hypothetical protein FLJ10706   | LOC498265  | 498265 | 1,79 | up   |
| 5674147 | 7113339 | 1160711 | similar to hypothetical protein FLJ10706   | LOC498265  | 498265 | 1,05 | down |
| 5676051 | 7113339 | 1160710 | similar to hypothetical protein FLJ10706   | LOC498265  | 498265 | 1,87 | up   |
| 5836736 | 7113339 | 1160728 | similar to hypothetical protein FLJ10706   | LOC498265  | 498265 | 1,08 | down |
| 5874583 | 7113339 | 1160713 | similar to hypothetical protein FLJ10706   | LOC498265  | 498265 | 1,30 | down |
| 5973022 | 7113339 | 1160721 | similar to hypothetical protein FLJ10706   | LOC498265  | 498265 | 1,89 | up   |
| 6015435 | 7113339 | 1160731 | similar to hypothetical protein FLJ10706   | LOC498265  | 498265 | 1,02 | down |
| 6017291 | 7113339 | 1160715 | similar to hypothetical protein FLJ10706   | LOC498265  | 498265 | 1,16 | down |
| 6068643 | 7113339 | 1160708 | similar to hypothetical protein FLJ10706   | LOC498265  | 498265 | 1,34 | down |
| 6135900 | 7113339 | 1160722 | similar to hypothetical protein FLJ10706   | LOC498265  | 498265 | 1,16 | down |
| 6136049 | 7113339 | 1160725 | similar to hypothetical protein FLJ10706   | LOC498265  | 498265 | 1,28 | down |
| 6147552 | 7113339 | 1160720 | similar to hypothetical protein FLJ10706   | LOC498265  | 498265 | 1,02 | up   |
| 6194263 | 7113339 | 1160721 | similar to hypothetical protein FLJ10706   | LOC498265  | 498265 | 1,26 | down |
| 6283753 | 7113339 | 1160727 | similar to hypothetical protein FLJ10706   | LOC498265  | 498265 | 1,07 | down |
| 6314788 | 7113339 | 1160713 | similar to hypothetical protein FLJ10706   | LOC498265  | 498265 | 1,12 | down |
| 6318895 | 7113339 | 1160717 | similar to hypothetical protein FLJ10706   | LOC498265  | 498265 | 1,26 | up   |
| 6354401 | 7113339 | 1160731 | similar to hypothetical protein FLJ10706   | LOC498265  | 498265 | 1,12 | up   |
| 6441347 | 7113339 | 1160716 | similar to hypothetical protein FLJ10706   | LOC498265  | 498265 | 1,03 | down |
| 6493146 | 7113339 | 1160724 | similar to hypothetical protein FLJ10706   | LOC498265  | 498265 | 1,07 | down |
| 6520899 | 7113339 | 1160730 | similar to hypothetical protein FLJ10706   | LOC498265  | 498265 | 1,04 | down |
| 6531892 | 7113339 | 1160726 | similar to hypothetical protein FLJ10706   | LOC498265  | 498265 | 1,27 | down |
| 6566855 | 7113339 | 1160729 | similar to hypothetical protein FLJ10706   | LOC498265  | 498265 | 1,01 | up   |
| 6629952 | 7113339 | 1160718 | similar to hypothetical protein FLJ10706   | LOC498265  | 498265 | 1,31 | up   |
| 6670438 | 7113339 | 1160723 | similar to hypothetical protein FLJ10706   | LOC498265  | 498265 | 1,45 | down |
| 6688451 | 7113339 | 1160715 | similar to hypothetical protein FLJ10706   | LOC498265  | 498265 | 3,32 | up   |
| 6688901 | 7113339 | 1160712 | similar to hypothetical protein FLJ10706   | LOC498265  | 498265 | 1,14 | up   |
| 6701120 | 7113339 | 1160709 | similar to hypothetical protein FLJ10706   | LOC498265  | 498265 | 1,05 | up   |
| 6717048 | 7113339 | 1160714 | similar to hypothetical protein FLJ10706   | LOC498265  | 498265 | 1,26 | up   |
| 5884414 | 7255508 | 1511313 | similar to hypothetical protein FLJ12056   | RGD1561200 | 500230 | 1,11 | up   |
| 6001441 | 7255508 | 1511312 | similar to hypothetical protein FLJ12056   | RGD1561200 | 500230 | 1,05 | up   |
| 6107525 | 7255508 | 1511317 | similar to hypothetical protein FLJ12056   | RGD1561200 | 500230 | 1,25 | down |
| 6153033 | 7255508 | 1511313 | similar to hypothetical protein FLJ12056   | RGD1561200 | 500230 | 2,44 | up   |
| 6275316 | 7255508 | 1511314 | similar to hypothetical protein FLJ12056   | RGD1561200 | 500230 | 1,21 | down |
| 6475484 | 7255508 | 1511315 | similar to hypothetical protein FLJ12056   | RGD1561200 | 500230 | 1,35 | up   |
| 6493782 | 7255508 | 1511313 | similar to hypothetical protein FLJ12056   | RGD1561200 | 500230 | 1,11 | down |
| 6549782 | 7255508 | 1511318 | similar to hypothetical protein FLJ12056   | RGD1561200 | 500230 | 1,18 | down |
| 6736874 | 7255508 | 1511316 | similar to hypothetical protein FLJ12056   | RGD1561200 | 500230 | 1,13 | down |
| 5765769 | 7318596 | 1668925 | similar to hypothetical protein FLJ12242   | RGD1311154 | 300317 | 2,23 | up   |
| 5906390 | 7318596 | 1668926 | similar to hypothetical protein FLJ12242   | RGD1311154 | 300317 | 1,24 | up   |
| 6166024 | 7318596 | 1668931 | similar to hypothetical protein FLJ12242   | RGD1311154 | 300317 | 1,33 | up   |
| 6214316 | 7318596 | 1668936 | similar to hypothetical protein FLJ12242   | RGD1311154 | 300317 | 1,36 | up   |
| 6436539 | 7318596 | 1668929 | similar to hypothetical protein FLJ12242   | RGD1311154 | 300317 | 1,16 | up   |
| 6498954 | 7318596 | 1668936 | similar to hypothetical protein FLJ12242   | RGD1311154 | 300317 | 2,81 | down |
| 6656054 | 7318596 | 1668928 | similar to hypothetical protein FLJ12242   | RGD1311154 | 300317 | 1,21 | down |
| 6687367 | 7318596 | 1668938 | similar to hypothetical protein FLJ12242   | RGD1311154 | 300317 | 1,16 | up   |
| 5629785 | 7194017 | 1360789 | similar to hypothetical protein FLJ12661   | RGD1309403 | 310417 | 1,16 | down |
| 5655465 | 7194017 | 1360786 | similar to hypothetical protein FLJ12661   | RGD1309403 | 310417 | 1,13 | up   |
| 5786827 | 7194017 | 1360779 | similar to hypothetical protein FLJ12661   | RGD1309403 | 310417 | 1,45 | down |
| 5791125 | 7194017 | 1360791 | similar to hypothetical protein FLJ12661   | RGD1309403 | 310417 | 1,11 | down |
| 5839461 | 7194017 | 1360790 | similar to hypothetical protein FLJ12661   | RGD1309403 | 310417 | 1,38 | down |
| 5909838 | 7194017 | 1360791 | similar to hypothetical protein FLJ12661   | RGD1309403 | 310417 | 1,08 | down |
| 5925124 | 7194017 | 1360785 | similar to hypothetical protein FLJ12661   | RGD1309403 | 310417 | 1,14 | down |
| 5970521 | 7194017 | 1360779 | similar to hypothetical protein FLJ12661   | RGD1309403 | 310417 | 1,06 | down |
| 5989783 | 7194017 | 1360793 | similar to hypothetical protein FLJ12661   | RGD1309403 | 310417 | 1,37 | down |

|         |         |         |                                          |            |        |      |      |
|---------|---------|---------|------------------------------------------|------------|--------|------|------|
| 6067218 | 7194017 | 1360780 | similar to hypothetical protein FLJ12661 | RGD1309403 | 310417 | 1,05 | up   |
| 6070186 | 7194017 | 1360782 | similar to hypothetical protein FLJ12661 | RGD1309403 | 310417 | 1,08 | up   |
| 6073272 | 7194017 | 1360787 | similar to hypothetical protein FLJ12661 | RGD1309403 | 310417 | 1,30 | up   |
| 6112713 | 7194017 | 1360791 | similar to hypothetical protein FLJ12661 | RGD1309403 | 310417 | 1,28 | down |
| 6122177 | 7194017 | 1360783 | similar to hypothetical protein FLJ12661 | RGD1309403 | 310417 | 1,07 | down |
| 6141837 | 7194017 | 1360791 | similar to hypothetical protein FLJ12661 | RGD1309403 | 310417 | 1,14 | down |
| 6296131 | 7194017 | 1360791 | similar to hypothetical protein FLJ12661 | RGD1309403 | 310417 | 1,01 | down |
| 6308780 | 7194017 | 1360784 | similar to hypothetical protein FLJ12661 | RGD1309403 | 310417 | 2,36 | up   |
| 6331928 | 7194017 | 1360791 | similar to hypothetical protein FLJ12661 | RGD1309403 | 310417 | 1,42 | up   |
| 6343538 | 7194017 | 1360791 | similar to hypothetical protein FLJ12661 | RGD1309403 | 310417 | 1,27 | up   |
| 6551851 | 7194017 | 1360791 | similar to hypothetical protein FLJ12661 | RGD1309403 | 310417 | 1,16 | up   |
| 6587260 | 7194017 | 1360788 | similar to hypothetical protein FLJ12661 | RGD1309403 | 310417 | 1,03 | up   |
| 6676724 | 7194017 | 1360793 | similar to hypothetical protein FLJ12661 | RGD1309403 | 310417 | 1,28 | down |
| 5664620 | 7236851 | 1465387 | similar to hypothetical protein FLJ13045 | RGD1307615 | 362084 | 1,32 | up   |
| 5682585 | 7236851 | 1465398 | similar to hypothetical protein FLJ13045 | RGD1307615 | 362084 | 1,20 | down |
| 5703663 | 7236851 | 1465386 | similar to hypothetical protein FLJ13045 | RGD1307615 | 362084 | 1,01 | down |
| 5760947 | 7236851 | 1465386 | similar to hypothetical protein FLJ13045 | RGD1307615 | 362084 | 1,03 | up   |
| 5930443 | 7236851 | 1465380 | similar to hypothetical protein FLJ13045 | RGD1307615 | 362084 | 1,31 | down |
| 5979368 | 7236851 | 1465383 | similar to hypothetical protein FLJ13045 | RGD1307615 | 362084 | 1,05 | down |
| 6030242 | 7236851 | 1465382 | similar to hypothetical protein FLJ13045 | RGD1307615 | 362084 | 1,20 | down |
| 6041074 | 7236851 | 1465384 | similar to hypothetical protein FLJ13045 | RGD1307615 | 362084 | 1,06 | up   |
| 6045827 | 7236851 | 1465393 | similar to hypothetical protein FLJ13045 | RGD1307615 | 362084 | 1,18 | down |
| 6129999 | 7236851 | 1465382 | similar to hypothetical protein FLJ13045 | RGD1307615 | 362084 | 1,11 | down |
| 6142395 | 7236851 | 1465383 | similar to hypothetical protein FLJ13045 | RGD1307615 | 362084 | 1,06 | up   |
| 6166668 | 7236851 | 1465391 | similar to hypothetical protein FLJ13045 | RGD1307615 | 362084 | 1,13 | up   |
| 6334127 | 7236851 | 1465394 | similar to hypothetical protein FLJ13045 | RGD1307615 | 362084 | 1,28 | up   |
| 6388614 | 7236851 | 1465392 | similar to hypothetical protein FLJ13045 | RGD1307615 | 362084 | 1,04 | down |
| 6424066 | 7236851 | 1465390 | similar to hypothetical protein FLJ13045 | RGD1307615 | 362084 | 1,17 | up   |
| 6430265 | 7236851 | 1465382 | similar to hypothetical protein FLJ13045 | RGD1307615 | 362084 | 1,50 | down |
| 6503099 | 7236851 | 1465382 | similar to hypothetical protein FLJ13045 | RGD1307615 | 362084 | 1,30 | up   |
| 6606369 | 7236851 | 1465398 | similar to hypothetical protein FLJ13045 | RGD1307615 | 362084 | 1,00 | up   |
| 6672173 | 7236851 | 1465381 | similar to hypothetical protein FLJ13045 | RGD1307615 | 362084 | 1,21 | down |
| 6698903 | 7236851 | 1465389 | similar to hypothetical protein FLJ13045 | RGD1307615 | 362084 | 1,06 | up   |
| 6736252 | 7236851 | 1465388 | similar to hypothetical protein FLJ13045 | RGD1307615 | 362084 | 1,24 | up   |
| 5679940 | 7190534 | 1351209 | similar to hypothetical protein FLJ13231 | RGD1310081 | 310137 | 1,34 | up   |
| 5751686 | 7190534 | 1351216 | similar to hypothetical protein FLJ13231 | RGD1310081 | 310137 | 1,20 | up   |
| 5796179 | 7190534 | 1351241 | similar to hypothetical protein FLJ13231 | RGD1310081 | 310137 | 1,78 | down |
| 5836398 | 7190534 | 1351224 | similar to hypothetical protein FLJ13231 | RGD1310081 | 310137 | 1,41 | up   |
| 5897087 | 7190534 | 1351234 | similar to hypothetical protein FLJ13231 | RGD1310081 | 310137 | 1,54 | down |
| 5976527 | 7190534 | 1351217 | similar to hypothetical protein FLJ13231 | RGD1310081 | 310137 | 1,01 | down |
| 5994909 | 7190534 | 1351220 | similar to hypothetical protein FLJ13231 | RGD1310081 | 310137 | 1,05 | up   |
| 6095254 | 7190534 | 1351208 | similar to hypothetical protein FLJ13231 | RGD1310081 | 310137 | 1,14 | up   |
| 6100110 | 7190534 | 1351214 | similar to hypothetical protein FLJ13231 | RGD1310081 | 310137 | 1,28 | up   |
| 6106126 | 7190534 | 1351237 | similar to hypothetical protein FLJ13231 | RGD1310081 | 310137 | 2,06 | down |
| 6120386 | 7190534 | 1351235 | similar to hypothetical protein FLJ13231 | RGD1310081 | 310137 | 1,16 | down |
| 6154049 | 7190534 | 1351237 | similar to hypothetical protein FLJ13231 | RGD1310081 | 310137 | 1,32 | up   |
| 6221841 | 7190534 | 1351210 | similar to hypothetical protein FLJ13231 | RGD1310081 | 310137 | 1,42 | up   |
| 6228188 | 7190534 | 1351215 | similar to hypothetical protein FLJ13231 | RGD1310081 | 310137 | 1,06 | down |
| 6320827 | 7190534 | 1351219 | similar to hypothetical protein FLJ13231 | RGD1310081 | 310137 | 1,45 | up   |
| 6328857 | 7190534 | 1351229 | similar to hypothetical protein FLJ13231 | RGD1310081 | 310137 | 1,44 | up   |
| 6375241 | 7190534 | 1351226 | similar to hypothetical protein FLJ13231 | RGD1310081 | 310137 | 1,15 | up   |
| 6394901 | 7190534 | 1351236 | similar to hypothetical protein FLJ13231 | RGD1310081 | 310137 | 1,11 | down |
| 6410533 | 7190534 | 1351223 | similar to hypothetical protein FLJ13231 | RGD1310081 | 310137 | 1,13 | up   |
| 6437019 | 7190534 | 1351213 | similar to hypothetical protein FLJ13231 | RGD1310081 | 310137 | 1,43 | up   |
| 6444031 | 7190534 | 1351211 | similar to hypothetical protein FLJ13231 | RGD1310081 | 310137 | 1,25 | up   |
| 6444120 | 7190534 | 1351233 | similar to hypothetical protein FLJ13231 | RGD1310081 | 310137 | 1,68 | up   |

|         |         |         |                                                    |            |        |      |      |
|---------|---------|---------|----------------------------------------------------|------------|--------|------|------|
| 6448327 | 7190534 | 1351218 | similar to hypothetical protein FLJ13231           | RGD1310081 | 310137 | 1,00 | down |
| 6455710 | 7190534 | 1351239 | similar to hypothetical protein FLJ13231           | RGD1310081 | 310137 | 1,04 | down |
| 6516958 | 7190534 | 1351231 | similar to hypothetical protein FLJ13231           | RGD1310081 | 310137 | 1,08 | down |
| 6541943 | 7190534 | 1351239 | similar to hypothetical protein FLJ13231           | RGD1310081 | 310137 | 1,41 | down |
| 6659921 | 7190534 | 1351212 | similar to hypothetical protein FLJ13231           | RGD1310081 | 310137 | 1,33 | up   |
| 6691828 | 7190534 | 1351226 | similar to hypothetical protein FLJ13231           | RGD1310081 | 310137 | 2,12 | up   |
| 6699115 | 7190534 | 1351227 | similar to hypothetical protein FLJ13231           | RGD1310081 | 310137 | 1,50 | up   |
| 6721292 | 7190534 | 1351240 | similar to hypothetical protein FLJ13231           | RGD1310081 | 310137 | 1,03 | down |
| 5656061 | 7283819 | 1582135 | similar to hypothetical protein FLJ20171           | RGD1560481 | 500409 | 1,10 | up   |
| 5659554 | 7283819 | 1582127 | similar to hypothetical protein FLJ20171           | RGD1560481 | 500409 | 1,12 | up   |
| 5737629 | 7283819 | 1582137 | similar to hypothetical protein FLJ20171           | RGD1560481 | 500409 | 1,58 | up   |
| 5826003 | 7283819 | 1582134 | similar to hypothetical protein FLJ20171           | RGD1560481 | 500409 | 1,02 | up   |
| 5966887 | 7283819 | 1582145 | similar to hypothetical protein FLJ20171           | RGD1560481 | 500409 | 1,14 | up   |
| 5968868 | 7283819 | 1582145 | similar to hypothetical protein FLJ20171           | RGD1560481 | 500409 | 1,17 | down |
| 6058676 | 7283819 | 1582131 | similar to hypothetical protein FLJ20171           | RGD1560481 | 500409 | 1,11 | down |
| 6095180 | 7283819 | 1582129 | similar to hypothetical protein FLJ20171           | RGD1560481 | 500409 | 1,03 | up   |
| 6148256 | 7283819 | 1582131 | similar to hypothetical protein FLJ20171           | RGD1560481 | 500409 | 1,03 | down |
| 6282057 | 7283819 | 1582144 | similar to hypothetical protein FLJ20171           | RGD1560481 | 500409 | 1,10 | up   |
| 6425882 | 7283819 | 1582122 | similar to hypothetical protein FLJ20171           | RGD1560481 | 500409 | 1,23 | down |
| 6440660 | 7283819 | 1582119 | similar to hypothetical protein FLJ20171           | RGD1560481 | 500409 | 1,05 | up   |
| 6458205 | 7283819 | 1582141 | similar to hypothetical protein FLJ20171           | RGD1560481 | 500409 | 1,14 | up   |
| 6576837 | 7283819 | 1582136 | similar to hypothetical protein FLJ20171           | RGD1560481 | 500409 | 1,04 | down |
| 6607257 | 7283819 | 1582138 | similar to hypothetical protein FLJ20171           | RGD1560481 | 500409 | 1,34 | up   |
| 6626988 | 7283819 | 1582133 | similar to hypothetical protein FLJ20171           | RGD1560481 | 500409 | 1,14 | up   |
| 6657479 | 7283819 | 1582142 | similar to hypothetical protein FLJ20171           | RGD1560481 | 500409 | 1,30 | up   |
| 6684127 | 7283819 | 1582127 | similar to hypothetical protein FLJ20171           | RGD1560481 | 500409 | 2,15 | up   |
| 5836334 | 7098366 | 1123626 | similar to hypothetical protein FLJ21127           | RGD1566266 | 304486 | 1,27 | down |
| 6007577 | 7059584 | 1030563 | similar to hypothetical protein FLJ22531           | RGD1563323 | 361702 | 1,02 | up   |
| 6015337 | 7059584 | 1030560 | similar to hypothetical protein FLJ22531           | RGD1563323 | 361702 | 1,04 | up   |
| 6588547 | 7059584 | 1030561 | similar to hypothetical protein FLJ22531           | RGD1563323 | 361702 | 1,46 | up   |
| 6742927 | 7059584 | 1030562 | similar to hypothetical protein FLJ22531           | RGD1563323 | 361702 | 1,08 | down |
| 5695187 | 7190582 | 1351384 | similar to hypothetical protein FLJ30596           | RGD1306809 | 365699 | 2,08 | up   |
| 5795512 | 7190582 | 1351398 | similar to hypothetical protein FLJ30596           | RGD1306809 | 365699 | 1,24 | up   |
| 5853977 | 7190582 | 1351386 | similar to hypothetical protein FLJ30596           | RGD1306809 | 365699 | 1,08 | up   |
| 5919288 | 7190582 | 1351385 | similar to hypothetical protein FLJ30596           | RGD1306809 | 365699 | 1,17 | up   |
| 6017293 | 7190582 | 1351398 | similar to hypothetical protein FLJ30596           | RGD1306809 | 365699 | 1,16 | down |
| 6097867 | 7190582 | 1351397 | similar to hypothetical protein FLJ30596           | RGD1306809 | 365699 | 1,12 | down |
| 6187066 | 7190582 | 1351376 | similar to hypothetical protein FLJ30596           | RGD1306809 | 365699 | 1,33 | down |
| 6239061 | 7190582 | 1351376 | similar to hypothetical protein FLJ30596           | RGD1306809 | 365699 | 1,05 | down |
| 6386361 | 7190582 | 1351394 | similar to hypothetical protein FLJ30596           | RGD1306809 | 365699 | 2,02 | down |
| 6484415 | 7190582 | 1351396 | similar to hypothetical protein FLJ30596           | RGD1306809 | 365699 | 1,07 | down |
| 6629071 | 7190582 | 1351387 | similar to hypothetical protein FLJ30596           | RGD1306809 | 365699 | 1,11 | up   |
| 6646109 | 7190582 | 1351391 | similar to hypothetical protein FLJ30596           | RGD1306809 | 365699 | 1,14 | up   |
| 6670509 | 7190582 | 1351383 | similar to hypothetical protein FLJ30596           | RGD1306809 | 365699 | 1,62 | up   |
| 5670876 | 7031325 | 963572  | similar to hypothetical protein FLJ32796           | RGD1311142 | 361564 | 1,14 | up   |
| 5964440 | 7031325 | 963570  | similar to hypothetical protein FLJ32796           | RGD1311142 | 361564 | 1,55 | up   |
| 5964808 | 7031325 | 963574  | similar to hypothetical protein FLJ32796           | RGD1311142 | 361564 | 1,09 | down |
| 6168292 | 7031325 | 963571  | similar to hypothetical protein FLJ32796           | RGD1311142 | 361564 | 1,42 | down |
| 6228491 | 7031325 | 963570  | similar to hypothetical protein FLJ32796           | RGD1311142 | 361564 | 1,19 | up   |
| 6417424 | 7031325 | 963570  | similar to hypothetical protein FLJ32796           | RGD1311142 | 361564 | 1,01 | up   |
| 6559396 | 7031325 | 963574  | similar to hypothetical protein FLJ32796           | RGD1311142 | 361564 | 1,35 | up   |
| 5693084 | 7112672 | 1158997 | similar to hypothetical protein FLJ32940 isoform 1 | RGD1566124 | 501861 | 1,00 | down |
| 5698454 | 7112672 | 1158985 | similar to hypothetical protein FLJ32940 isoform 1 | RGD1566124 | 501861 | 1,50 | up   |
| 5819098 | 7112672 | 1158981 | similar to hypothetical protein FLJ32940 isoform 1 | RGD1566124 | 501861 | 1,08 | up   |
| 5854346 | 7112672 | 1158989 | similar to hypothetical protein FLJ32940 isoform 1 | RGD1566124 | 501861 | 1,67 | down |
| 5857703 | 7112672 | 1158991 | similar to hypothetical protein FLJ32940 isoform 1 | RGD1566124 | 501861 | 1,17 | up   |

|         |         |         |                                                    |            |        |      |      |
|---------|---------|---------|----------------------------------------------------|------------|--------|------|------|
| 5906582 | 7112672 | 1158979 | similar to hypothetical protein FLJ32940 isoform 1 | RGD1566124 | 501861 | 1,45 | up   |
| 6067327 | 7112672 | 1159004 | similar to hypothetical protein FLJ32940 isoform 1 | RGD1566124 | 501861 | 1,09 | up   |
| 6091430 | 7112672 | 1158985 | similar to hypothetical protein FLJ32940 isoform 1 | RGD1566124 | 501861 | 1,27 | up   |
| 6138218 | 7112672 | 1158998 | similar to hypothetical protein FLJ32940 isoform 1 | RGD1566124 | 501861 | 2,08 | up   |
| 6195040 | 7112672 | 1158983 | similar to hypothetical protein FLJ32940 isoform 1 | RGD1566124 | 501861 | 1,85 | down |
| 6369887 | 7112672 | 1159005 | similar to hypothetical protein FLJ32940 isoform 1 | RGD1566124 | 501861 | 1,57 | up   |
| 6388749 | 7112672 | 1158987 | similar to hypothetical protein FLJ32940 isoform 1 | RGD1566124 | 501861 | 1,41 | up   |
| 6430305 | 7112672 | 1159001 | similar to hypothetical protein FLJ32940 isoform 1 | RGD1566124 | 501861 | 1,10 | down |
| 6471101 | 7112672 | 1158984 | similar to hypothetical protein FLJ32940 isoform 1 | RGD1566124 | 501861 | 1,07 | down |
| 6536910 | 7112672 | 1158990 | similar to hypothetical protein FLJ32940 isoform 1 | RGD1566124 | 501861 | 1,45 | down |
| 6538013 | 7112672 | 1159005 | similar to hypothetical protein FLJ32940 isoform 1 | RGD1566124 | 501861 | 1,07 | down |
| 6561177 | 7112672 | 1158982 | similar to hypothetical protein FLJ32940 isoform 1 | RGD1566124 | 501861 | 1,18 | up   |
| 6582473 | 7112672 | 1159006 | similar to hypothetical protein FLJ32940 isoform 1 | RGD1566124 | 501861 | 2,12 | down |
| 6583904 | 7112672 | 1158990 | similar to hypothetical protein FLJ32940 isoform 1 | RGD1566124 | 501861 | 1,39 | down |
| 6585092 | 7112672 | 1159000 | similar to hypothetical protein FLJ32940 isoform 1 | RGD1566124 | 501861 | 1,13 | down |
| 6599332 | 7112672 | 1158994 | similar to hypothetical protein FLJ32940 isoform 1 | RGD1566124 | 501861 | 1,27 | up   |
| 6611991 | 7112672 | 1158992 | similar to hypothetical protein FLJ32940 isoform 1 | RGD1566124 | 501861 | 1,34 | down |
| 6657708 | 7112672 | 1158993 | similar to hypothetical protein FLJ32940 isoform 1 | RGD1566124 | 501861 | 1,29 | down |
| 6667436 | 7112672 | 1158996 | similar to hypothetical protein FLJ32940 isoform 1 | RGD1566124 | 501861 | 1,02 | up   |
| 5940348 | 7095956 | 1117046 | similar to Hypothetical protein LOC73072           | RGD1566084 | 501795 | 1,66 | down |
| 5623827 | 7242490 | 1479424 | similar to hypothetical protein MGC25461           | RGD1306717 | 311257 | 1,32 | down |
| 5697732 | 7242490 | 1479443 | similar to hypothetical protein MGC25461           | RGD1306717 | 311257 | 1,12 | up   |
| 5743202 | 7242490 | 1479437 | similar to hypothetical protein MGC25461           | RGD1306717 | 311257 | 1,68 | up   |
| 5752193 | 7242490 | 1479445 | similar to hypothetical protein MGC25461           | RGD1306717 | 311257 | 1,14 | down |
| 5763233 | 7242490 | 1479424 | similar to hypothetical protein MGC25461           | RGD1306717 | 311257 | 1,38 | up   |
| 5774645 | 7242490 | 1479447 | similar to hypothetical protein MGC25461           | RGD1306717 | 311257 | 1,20 | up   |
| 5788840 | 7242490 | 1479448 | similar to hypothetical protein MGC25461           | RGD1306717 | 311257 | 1,39 | up   |
| 5824153 | 7242490 | 1479443 | similar to hypothetical protein MGC25461           | RGD1306717 | 311257 | 1,01 | down |
| 5888791 | 7242490 | 1479444 | similar to hypothetical protein MGC25461           | RGD1306717 | 311257 | 1,01 | down |
| 5893176 | 7242490 | 1479439 | similar to hypothetical protein MGC25461           | RGD1306717 | 311257 | 1,22 | up   |
| 6038084 | 7242490 | 1479452 | similar to hypothetical protein MGC25461           | RGD1306717 | 311257 | 1,36 | down |
| 6082587 | 7242490 | 1479451 | similar to hypothetical protein MGC25461           | RGD1306717 | 311257 | 1,19 | down |
| 6104594 | 7242490 | 1479449 | similar to hypothetical protein MGC25461           | RGD1306717 | 311257 | 1,10 | up   |
| 6118498 | 7242490 | 1479425 | similar to hypothetical protein MGC25461           | RGD1306717 | 311257 | 1,08 | down |
| 6166169 | 7242490 | 1479438 | similar to hypothetical protein MGC25461           | RGD1306717 | 311257 | 1,00 | down |
| 6204376 | 7242490 | 1479446 | similar to hypothetical protein MGC25461           | RGD1306717 | 311257 | 2,37 | down |
| 6214553 | 7242490 | 1479441 | similar to hypothetical protein MGC25461           | RGD1306717 | 311257 | 1,00 | up   |
| 6293383 | 7242490 | 1479455 | similar to hypothetical protein MGC25461           | RGD1306717 | 311257 | 1,18 | down |
| 6295884 | 7242490 | 1479453 | similar to hypothetical protein MGC25461           | RGD1306717 | 311257 | 1,12 | down |
| 6329836 | 7242490 | 1479443 | similar to hypothetical protein MGC25461           | RGD1306717 | 311257 | 1,15 | down |
| 6333710 | 7242490 | 1479429 | similar to hypothetical protein MGC25461           | RGD1306717 | 311257 | 1,40 | up   |
| 6376504 | 7242490 | 1479450 | similar to hypothetical protein MGC25461           | RGD1306717 | 311257 | 1,18 | down |
| 6499374 | 7242490 | 1479452 | similar to hypothetical protein MGC25461           | RGD1306717 | 311257 | 1,20 | up   |
| 6516025 | 7242490 | 1479424 | similar to hypothetical protein MGC25461           | RGD1306717 | 311257 | 1,03 | down |
| 6523046 | 7242490 | 1479431 | similar to hypothetical protein MGC25461           | RGD1306717 | 311257 | 1,10 | down |
| 6645605 | 7242490 | 1479434 | similar to hypothetical protein MGC25461           | RGD1306717 | 311257 | 1,19 | up   |
| 6678949 | 7242490 | 1479424 | similar to hypothetical protein MGC25461           | RGD1306717 | 311257 | 1,10 | up   |
| 6683612 | 7242490 | 1479435 | similar to hypothetical protein MGC25461           | RGD1306717 | 311257 | 1,14 | up   |
| 6691344 | 7242490 | 1479426 | similar to hypothetical protein MGC25461           | RGD1306717 | 311257 | 1,01 | down |
| 6731017 | 7242490 | 1479430 | similar to hypothetical protein MGC25461           | RGD1306717 | 311257 | 1,30 | down |
| 6734666 | 7242490 | 1479436 | similar to hypothetical protein MGC25461           | RGD1306717 | 311257 | 1,28 | down |
| 5688072 | 7255755 | 1511914 | similar to Hypothetical protein MGC25529           | RGD1306746 | 312511 | 1,43 | down |
| 5724763 | 7255755 | 1511923 | similar to Hypothetical protein MGC25529           | RGD1306746 | 312511 | 1,06 | up   |
| 5735807 | 7255755 | 1511916 | similar to Hypothetical protein MGC25529           | RGD1306746 | 312511 | 1,29 | up   |
| 5825055 | 7255755 | 1511924 | similar to Hypothetical protein MGC25529           | RGD1306746 | 312511 | 1,06 | down |
| 5853244 | 7255755 | 1511917 | similar to Hypothetical protein MGC25529           | RGD1306746 | 312511 | 1,24 | down |

|         |         |         |                                                                                              |            |        |      |      |
|---------|---------|---------|----------------------------------------------------------------------------------------------|------------|--------|------|------|
| 6101548 | 7255755 | 1511920 | similar to Hypothetical protein MGC25529                                                     | RGD1306746 | 312511 | 1,07 | up   |
| 6110081 | 7255755 | 1511918 | similar to Hypothetical protein MGC25529                                                     | RGD1306746 | 312511 | 1,01 | up   |
| 6144858 | 7255755 | 1511921 | similar to Hypothetical protein MGC25529                                                     | RGD1306746 | 312511 | 1,39 | down |
| 6305644 | 7255755 | 1511923 | similar to Hypothetical protein MGC25529                                                     | RGD1306746 | 312511 | 1,38 | down |
| 6495130 | 7255755 | 1511919 | similar to Hypothetical protein MGC25529                                                     | RGD1306746 | 312511 | 1,00 | up   |
| 6517273 | 7255755 | 1511915 | similar to Hypothetical protein MGC25529                                                     | RGD1306746 | 312511 | 2,04 | down |
| 5749971 | 7040655 | 986962  | similar to hypothetical protein MGC34760                                                     | RGD1359349 | 361744 | 1,05 | up   |
| 5929314 | 7040655 | 986965  | similar to hypothetical protein MGC34760                                                     | RGD1359349 | 361744 | 1,19 | down |
| 6316631 | 7040655 | 986964  | similar to hypothetical protein MGC34760                                                     | RGD1359349 | 361744 | 1,37 | up   |
| 6349698 | 7040655 | 986963  | similar to hypothetical protein MGC34760                                                     | RGD1359349 | 361744 | 1,29 | up   |
| 6516082 | 7040655 | 986965  | similar to hypothetical protein MGC34760                                                     | RGD1359349 | 361744 | 1,05 | down |
| 6586233 | 7040655 | 986965  | similar to hypothetical protein MGC34760                                                     | RGD1359349 | 361744 | 2,35 | down |
| 6592794 | 7040655 | 986962  | similar to hypothetical protein MGC34760                                                     | RGD1359349 | 361744 | 1,01 | down |
| 5829998 | 7059429 | 1030246 | similar to hypothetical protein MGC37914                                                     | RGD1307603 | 293656 | 1,02 | up   |
| 5965910 | 7059429 | 1030247 | similar to hypothetical protein MGC37914                                                     | RGD1307603 | 293656 | 1,20 | up   |
| 6049941 | 7059429 | 1030244 | similar to hypothetical protein MGC37914                                                     | RGD1307603 | 293656 | 1,09 | up   |
| 6221442 | 7059429 | 1030249 | similar to hypothetical protein MGC37914                                                     | RGD1307603 | 293656 | 1,52 | down |
| 6305313 | 7059429 | 1030242 | similar to hypothetical protein MGC37914                                                     | RGD1307603 | 293656 | 1,32 | up   |
| 6357081 | 7059429 | 1030241 | similar to hypothetical protein MGC37914                                                     | RGD1307603 | 293656 | 2,43 | up   |
| 6625804 | 7059429 | 1030245 | similar to hypothetical protein MGC37914                                                     | RGD1307603 | 293656 | 1,45 | down |
| 5744163 | 7290585 | 1598178 | similar to hypothetical protein MGC47816                                                     | RGD1306880 | 313553 | 2,40 | down |
| 6423785 | 7083030 | 1086272 | similar to Integrin alpha-IIb precursor (Platelet membrane glycoprotein IIb) (GPAI $\beta$ ) | LOC685269  | 685269 | 1,03 | down |
| 6702097 | 7083030 | 1086243 | similar to Integrin alpha-IIb precursor (Platelet membrane glycoprotein IIb) (GPAI $\beta$ ) | LOC685269  | 685269 | 1,25 | down |
| 6395448 | 7170909 | 1302053 | similar to interferon-inducible GTPase                                                       | MGC108823  | 307414 | 6,18 | up   |
| 6458418 | 7170909 | 1302052 | similar to interferon-inducible GTPase                                                       | MGC108823  | 307414 | 1,04 | down |
| 6496597 | 7170909 | 1302053 | similar to interferon-inducible GTPase                                                       | MGC108823  | 307414 | 7,64 | up   |
| 6553314 | 7170909 | 1302054 | similar to interferon-inducible GTPase                                                       | MGC108823  | 307414 | 1,33 | down |
| 6634436 | 7170909 | 1302053 | similar to interferon-inducible GTPase                                                       | MGC108823  | 307414 | 6,61 | up   |
| 6641304 | 7170909 | 1302053 | similar to interferon-inducible GTPase                                                       | MGC108823  | 307414 | 5,30 | down |
| 6665677 | 7170909 | 1302053 | similar to interferon-inducible GTPase                                                       | MGC108823  | 307414 | 1,25 | down |
| 5624604 | 7374362 | 1807620 | similar to IQ motif and Sec7 domain 2                                                        | LOC685244  | 685244 | 1,48 | down |
| 5652420 | 7374362 | 1807622 | similar to IQ motif and Sec7 domain 2                                                        | LOC685244  | 685244 | 1,49 | up   |
| 6447272 | 7374362 | 1807618 | similar to IQ motif and Sec7 domain 2                                                        | LOC685244  | 685244 | 1,19 | up   |
| 5629195 | 7370446 | 1796988 | similar to jumonji domain containing 2B                                                      | LOC301128  | 301128 | 1,05 | down |
| 5652241 | 7370446 | 1797017 | similar to jumonji domain containing 2B                                                      | LOC301128  | 301128 | 1,20 | down |
| 5703218 | 7370446 | 1796991 | similar to jumonji domain containing 2B                                                      | LOC301128  | 301128 | 1,06 | down |
| 5707303 | 7370446 | 1796993 | similar to jumonji domain containing 2B                                                      | LOC301128  | 301128 | 1,07 | up   |
| 5742711 | 7370446 | 1796999 | similar to jumonji domain containing 2B                                                      | LOC301128  | 301128 | 1,01 | up   |
| 5771204 | 7370446 | 1796996 | similar to jumonji domain containing 2B                                                      | LOC301128  | 301128 | 1,33 | up   |
| 5784411 | 7370446 | 1797015 | similar to jumonji domain containing 2B                                                      | LOC301128  | 301128 | 1,04 | up   |
| 5792615 | 7370446 | 1796996 | similar to jumonji domain containing 2B                                                      | LOC301128  | 301128 | 1,16 | up   |
| 5886097 | 7370446 | 1796995 | similar to jumonji domain containing 2B                                                      | LOC301128  | 301128 | 1,05 | down |
| 5965738 | 7370446 | 1797011 | similar to jumonji domain containing 2B                                                      | LOC301128  | 301128 | 1,02 | up   |
| 5965891 | 7370446 | 1796996 | similar to jumonji domain containing 2B                                                      | LOC301128  | 301128 | 1,31 | up   |
| 6003147 | 7370446 | 1797010 | similar to jumonji domain containing 2B                                                      | LOC301128  | 301128 | 1,24 | down |
| 6019061 | 7370446 | 1797003 | similar to jumonji domain containing 2B                                                      | LOC301128  | 301128 | 1,03 | up   |
| 6128080 | 7370446 | 1797001 | similar to jumonji domain containing 2B                                                      | LOC301128  | 301128 | 2,35 | down |
| 6155518 | 7370446 | 1796988 | similar to jumonji domain containing 2B                                                      | LOC301128  | 301128 | 1,28 | down |
| 6175677 | 7370446 | 1796996 | similar to jumonji domain containing 2B                                                      | LOC301128  | 301128 | 1,62 | up   |
| 6205661 | 7370446 | 1796997 | similar to jumonji domain containing 2B                                                      | LOC301128  | 301128 | 1,17 | down |
| 6215605 | 7370446 | 1796998 | similar to jumonji domain containing 2B                                                      | LOC301128  | 301128 | 1,09 | down |
| 6221395 | 7370446 | 1797012 | similar to jumonji domain containing 2B                                                      | LOC301128  | 301128 | 1,09 | up   |
| 6295395 | 7370446 | 1797001 | similar to jumonji domain containing 2B                                                      | LOC301128  | 301128 | 1,44 | up   |
| 6324028 | 7370446 | 1797020 | similar to jumonji domain containing 2B                                                      | LOC301128  | 301128 | 1,47 | down |
| 6353129 | 7370446 | 1797002 | similar to jumonji domain containing 2B                                                      | LOC301128  | 301128 | 1,27 | down |
| 6409265 | 7370446 | 1796992 | similar to jumonji domain containing 2B                                                      | LOC301128  | 301128 | 1,09 | up   |

|         |         |         |                                               |            |        |      |      |
|---------|---------|---------|-----------------------------------------------|------------|--------|------|------|
| 6434731 | 7370446 | 1796989 | similar to jumonji domain containing 2B       | LOC301128  | 301128 | 1,19 | down |
| 6438485 | 7370446 | 1797017 | similar to jumonji domain containing 2B       | LOC301128  | 301128 | 1,27 | up   |
| 6441920 | 7370446 | 1797005 | similar to jumonji domain containing 2B       | LOC301128  | 301128 | 1,11 | up   |
| 6442505 | 7370446 | 1796998 | similar to jumonji domain containing 2B       | LOC301128  | 301128 | 1,26 | down |
| 6486789 | 7370446 | 1796995 | similar to jumonji domain containing 2B       | LOC301128  | 301128 | 1,23 | up   |
| 6579566 | 7370446 | 1796996 | similar to jumonji domain containing 2B       | LOC301128  | 301128 | 1,12 | up   |
| 6624238 | 7370446 | 1796990 | similar to jumonji domain containing 2B       | LOC301128  | 301128 | 1,22 | down |
| 6632655 | 7370446 | 1797017 | similar to jumonji domain containing 2B       | LOC301128  | 301128 | 1,19 | up   |
| 6650398 | 7370446 | 1797018 | similar to jumonji domain containing 2B       | LOC301128  | 301128 | 1,22 | up   |
| 6712780 | 7370446 | 1797016 | similar to jumonji domain containing 2B       | LOC301128  | 301128 | 1,27 | up   |
| 6513553 | 7191382 | 1353515 | similar to keratin complex 1, acidic, gene 18 | LOC683212  | 683212 | 1,32 | down |
| 6636863 | 7191382 | 1353518 | similar to keratin complex 1, acidic, gene 18 | LOC683212  | 683212 | 1,03 | down |
| 5650936 | 7271008 | 1549928 | similar to KIAA0528 protein                   | RGD1304592 | 362461 | 1,04 | up   |
| 5664313 | 7271008 | 1549965 | similar to KIAA0528 protein                   | RGD1304592 | 362461 | 1,54 | down |
| 5665292 | 7271008 | 1549939 | similar to KIAA0528 protein                   | RGD1304592 | 362461 | 1,44 | up   |
| 5699659 | 7271008 | 1549957 | similar to KIAA0528 protein                   | RGD1304592 | 362461 | 1,16 | up   |
| 5711799 | 7271008 | 1549936 | similar to KIAA0528 protein                   | RGD1304592 | 362461 | 1,08 | down |
| 5758777 | 7271008 | 1549944 | similar to KIAA0528 protein                   | RGD1304592 | 362461 | 1,11 | down |
| 5760363 | 7271008 | 1549930 | similar to KIAA0528 protein                   | RGD1304592 | 362461 | 1,03 | up   |
| 5772786 | 7271008 | 1549932 | similar to KIAA0528 protein                   | RGD1304592 | 362461 | 1,04 | down |
| 5774034 | 7271008 | 1549945 | similar to KIAA0528 protein                   | RGD1304592 | 362461 | 1,52 | up   |
| 5774186 | 7271008 | 1549933 | similar to KIAA0528 protein                   | RGD1304592 | 362461 | 1,24 | up   |
| 5838398 | 7271008 | 1549940 | similar to KIAA0528 protein                   | RGD1304592 | 362461 | 1,36 | up   |
| 5843618 | 7271008 | 1549947 | similar to KIAA0528 protein                   | RGD1304592 | 362461 | 1,49 | down |
| 5844578 | 7271008 | 1549941 | similar to KIAA0528 protein                   | RGD1304592 | 362461 | 1,13 | down |
| 5848370 | 7271008 | 1549931 | similar to KIAA0528 protein                   | RGD1304592 | 362461 | 1,08 | up   |
| 5884123 | 7271008 | 1549942 | similar to KIAA0528 protein                   | RGD1304592 | 362461 | 1,44 | up   |
| 5956918 | 7271008 | 1549949 | similar to KIAA0528 protein                   | RGD1304592 | 362461 | 1,80 | down |
| 6070911 | 7271008 | 1549962 | similar to KIAA0528 protein                   | RGD1304592 | 362461 | 1,09 | down |
| 6122707 | 7271008 | 1549976 | similar to KIAA0528 protein                   | RGD1304592 | 362461 | 1,19 | up   |
| 6169709 | 7271008 | 1549959 | similar to KIAA0528 protein                   | RGD1304592 | 362461 | 1,15 | down |
| 6267148 | 7271008 | 1549937 | similar to KIAA0528 protein                   | RGD1304592 | 362461 | 1,14 | down |
| 6385045 | 7271008 | 1549977 | similar to KIAA0528 protein                   | RGD1304592 | 362461 | 2,26 | up   |
| 6495136 | 7271008 | 1549968 | similar to KIAA0528 protein                   | RGD1304592 | 362461 | 1,35 | down |
| 6552380 | 7271008 | 1549943 | similar to KIAA0528 protein                   | RGD1304592 | 362461 | 1,09 | down |
| 6636085 | 7271008 | 1549967 | similar to KIAA0528 protein                   | RGD1304592 | 362461 | 1,64 | down |
| 6659540 | 7271008 | 1549938 | similar to KIAA0528 protein                   | RGD1304592 | 362461 | 1,24 | up   |
| 6661599 | 7271008 | 1549967 | similar to KIAA0528 protein                   | RGD1304592 | 362461 | 1,17 | down |
| 6662850 | 7271008 | 1549970 | similar to KIAA0528 protein                   | RGD1304592 | 362461 | 1,39 | down |
| 6691247 | 7271008 | 1549928 | similar to KIAA0528 protein                   | RGD1304592 | 362461 | 1,13 | down |
| 6745685 | 7271008 | 1549971 | similar to KIAA0528 protein                   | RGD1304592 | 362461 | 1,13 | down |
| 5628017 | 7293402 | 1604862 | similar to KIAA0833 protein                   | LOC362665  | 362665 | 1,28 | up   |
| 6437525 | 7293402 | 1604869 | similar to KIAA0833 protein                   | LOC362665  | 362665 | 1,05 | up   |
| 6636344 | 7293402 | 1604869 | similar to KIAA0833 protein                   | LOC362665  | 362665 | 1,06 | up   |
| 6649914 | 7293402 | 1604861 | similar to KIAA0833 protein                   | LOC362665  | 362665 | 1,13 | up   |
| 5657792 | 7322020 | 1676639 | similar to KIAA1086 protein                   | RGD1304737 | 314639 | 1,42 | down |
| 5695094 | 7322020 | 1676648 | similar to KIAA1086 protein                   | RGD1304737 | 314639 | 1,13 | up   |
| 5755196 | 7322020 | 1676637 | similar to KIAA1086 protein                   | RGD1304737 | 314639 | 1,82 | down |
| 5808717 | 7322020 | 1676645 | similar to KIAA1086 protein                   | RGD1304737 | 314639 | 1,45 | up   |
| 5826589 | 7322020 | 1676638 | similar to KIAA1086 protein                   | RGD1304737 | 314639 | 1,18 | down |
| 5935839 | 7322020 | 1676640 | similar to KIAA1086 protein                   | RGD1304737 | 314639 | 1,11 | up   |
| 5939223 | 7322020 | 1676649 | similar to KIAA1086 protein                   | RGD1304737 | 314639 | 1,06 | up   |
| 6083588 | 7322020 | 1676634 | similar to KIAA1086 protein                   | RGD1304737 | 314639 | 1,48 | down |
| 6092551 | 7322020 | 1676644 | similar to KIAA1086 protein                   | RGD1304737 | 314639 | 1,13 | up   |
| 6126208 | 7322020 | 1676652 | similar to KIAA1086 protein                   | RGD1304737 | 314639 | 2,60 | down |
| 6146208 | 7322020 | 1676634 | similar to KIAA1086 protein                   | RGD1304737 | 314639 | 1,04 | up   |

|         |         |         |                                                                |                      |                   |      |      |
|---------|---------|---------|----------------------------------------------------------------|----------------------|-------------------|------|------|
| 6216728 | 7322020 | 1676647 | similar to KIAA1086 protein                                    | RGD1304737           | 314639            | 1,09 | down |
| 6305273 | 7322020 | 1676641 | similar to KIAA1086 protein                                    | RGD1304737           | 314639            | 1,08 | up   |
| 6318661 | 7322020 | 1676648 | similar to KIAA1086 protein                                    | RGD1304737           | 314639            | 1,12 | up   |
| 6365030 | 7322020 | 1676634 | similar to KIAA1086 protein                                    | RGD1304737           | 314639            | 1,84 | down |
| 6373942 | 7322020 | 1676650 | similar to KIAA1086 protein                                    | RGD1304737           | 314639            | 1,16 | down |
| 6521408 | 7322020 | 1676635 | similar to KIAA1086 protein                                    | RGD1304737           | 314639            | 1,34 | up   |
| 6535281 | 7322020 | 1676643 | similar to KIAA1086 protein                                    | RGD1304737           | 314639            | 1,14 | down |
| 6564054 | 7322020 | 1676642 | similar to KIAA1086 protein                                    | RGD1304737           | 314639            | 1,00 | up   |
| 6623606 | 7322020 | 1676638 | similar to KIAA1086 protein                                    | RGD1304737           | 314639            | 1,04 | up   |
| 6625296 | 7322020 | 1676636 | similar to KIAA1086 protein                                    | RGD1304737           | 314639            | 1,09 | up   |
| 6672888 | 7322020 | 1676634 | similar to KIAA1086 protein                                    | RGD1304737           | 314639            | 1,00 | up   |
| 5643313 | 7212735 | 1405016 | similar to KIAA1324 protein                                    | RGD1310209           | 362019            | 1,27 | up   |
| 5691941 | 7212735 | 1405034 | similar to KIAA1324 protein                                    | RGD1310209           | 362019            | 2,17 | up   |
| 5723812 | 7212735 | 1405008 | similar to KIAA1324 protein                                    | RGD1310209           | 362019            | 1,00 | down |
| 5757081 | 7212735 | 1405018 | similar to KIAA1324 protein                                    | RGD1310209           | 362019            | 1,16 | down |
| 5766219 | 7212735 | 1405033 | similar to KIAA1324 protein                                    | RGD1310209           | 362019            | 1,03 | down |
| 5775493 | 7212735 | 1405013 | similar to KIAA1324 protein                                    | RGD1310209           | 362019            | 1,28 | up   |
| 6138465 | 7212735 | 1405010 | similar to KIAA1324 protein                                    | RGD1310209           | 362019            | 1,04 | down |
| 6172525 | 7212735 | 1405023 | similar to KIAA1324 protein                                    | RGD1310209           | 362019            | 1,24 | down |
| 6282303 | 7212735 | 1405019 | similar to KIAA1324 protein                                    | RGD1310209           | 362019            | 1,14 | up   |
| 6294927 | 7212735 | 1405015 | similar to KIAA1324 protein                                    | RGD1310209           | 362019            | 1,10 | down |
| 6333431 | 7212735 | 1405005 | similar to KIAA1324 protein                                    | RGD1310209           | 362019            | 1,44 | up   |
| 6336951 | 7212735 | 1405017 | similar to KIAA1324 protein                                    | RGD1310209           | 362019            | 1,07 | down |
| 6376977 | 7212735 | 1405020 | similar to KIAA1324 protein                                    | RGD1310209           | 362019            | 1,03 | down |
| 6410691 | 7212735 | 1405011 | similar to KIAA1324 protein                                    | RGD1310209           | 362019            | 1,09 | up   |
| 6448901 | 7212735 | 1405009 | similar to KIAA1324 protein                                    | RGD1310209           | 362019            | 1,26 | down |
| 6479653 | 7212735 | 1405004 | similar to KIAA1324 protein                                    | RGD1310209           | 362019            | 1,10 | up   |
| 6488019 | 7212735 | 1405003 | similar to KIAA1324 protein                                    | RGD1310209           | 362019            | 1,09 | down |
| 6532480 | 7212735 | 1405034 | similar to KIAA1324 protein                                    | RGD1310209           | 362019            | 1,53 | up   |
| 6621380 | 7212735 | 1405012 | similar to KIAA1324 protein                                    | RGD1310209           | 362019            | 1,07 | up   |
| 6666945 | 7212735 | 1405014 | similar to KIAA1324 protein                                    | RGD1310209           | 362019            | 1,20 | up   |
| 6699982 | 7212735 | 1405007 | similar to KIAA1324 protein                                    | RGD1310209           | 362019            | 1,09 | down |
| 5698297 | 7072765 | 1062727 | similar to KIAA1636 protein                                    | RGD1309285           | 303599            | 1,17 | up   |
| 5738970 | 7072765 | 1062720 | similar to KIAA1636 protein                                    | RGD1309285           | 303599            | 1,01 | up   |
| 5933239 | 7072765 | 1062728 | similar to KIAA1636 protein                                    | RGD1309285           | 303599            | 1,01 | down |
| 5942904 | 7072765 | 1062709 | similar to KIAA1636 protein                                    | RGD1309285           | 303599            | 1,25 | up   |
| 5973384 | 7072765 | 1062727 | similar to KIAA1636 protein                                    | RGD1309285           | 303599            | 1,01 | up   |
| 6144399 | 7072765 | 1062724 | similar to KIAA1636 protein                                    | RGD1309285           | 303599            | 1,05 | up   |
| 6258488 | 7072765 | 1062725 | similar to KIAA1636 protein                                    | RGD1309285           | 303599            | 1,21 | up   |
| 6436345 | 7072765 | 1062719 | similar to KIAA1636 protein                                    | RGD1309285           | 303599            | 1,03 | up   |
| 6526382 | 7072765 | 1062730 | similar to KIAA1636 protein                                    | RGD1309285           | 303599            | 1,00 | up   |
| 6668836 | 7072765 | 1062711 | similar to KIAA1636 protein                                    | RGD1309285           | 303599            | 1,44 | up   |
| 5816922 | 7072765 | 1062707 | similar to KIAA1636 protein /// hypothetical protein LOC688431 | RGD1309285 /// LOC68 | 303599 /// 688431 | 1,20 | up   |
| 6046200 | 7072765 | 1062707 | similar to KIAA1636 protein /// hypothetical protein LOC688431 | RGD1309285 /// LOC68 | 303599 /// 688431 | 1,18 | up   |
| 6446598 | 7072765 | 1062707 | similar to KIAA1636 protein /// hypothetical protein LOC688431 | RGD1309285 /// LOC68 | 303599 /// 688431 | 1,18 | up   |
| 5669583 | 7168403 | 1295566 | similar to KIAA1713 protein                                    | RGD1305869           | 307555            | 1,25 | down |
| 5685304 | 7168403 | 1295559 | similar to KIAA1713 protein                                    | RGD1305869           | 307555            | 1,20 | down |
| 5746414 | 7168403 | 1295582 | similar to KIAA1713 protein                                    | RGD1305869           | 307555            | 1,48 | up   |
| 5803374 | 7168403 | 1295548 | similar to KIAA1713 protein                                    | RGD1305869           | 307555            | 1,15 | down |
| 5911600 | 7168403 | 1295583 | similar to KIAA1713 protein                                    | RGD1305869           | 307555            | 2,25 | down |
| 5913621 | 7168403 | 1295583 | similar to KIAA1713 protein                                    | RGD1305869           | 307555            | 1,34 | up   |
| 5915494 | 7168403 | 1295583 | similar to KIAA1713 protein                                    | RGD1305869           | 307555            | 1,05 | up   |
| 6070311 | 7168403 | 1295583 | similar to KIAA1713 protein                                    | RGD1305869           | 307555            | 1,07 | down |
| 6081311 | 7168403 | 1295570 | similar to KIAA1713 protein                                    | RGD1305869           | 307555            | 1,27 | down |
| 6118779 | 7168403 | 1295567 | similar to KIAA1713 protein                                    | RGD1305869           | 307555            | 1,16 | up   |
| 6123569 | 7168403 | 1295583 | similar to KIAA1713 protein                                    | RGD1305869           | 307555            | 1,20 | down |

|         |         |         |                                                      |            |        |      |      |
|---------|---------|---------|------------------------------------------------------|------------|--------|------|------|
| 6182644 | 7168403 | 1295583 | similar to KIAA1713 protein                          | RGD1305869 | 307555 | 1,06 | up   |
| 6210482 | 7168403 | 1295583 | similar to KIAA1713 protein                          | RGD1305869 | 307555 | 1,44 | up   |
| 6222449 | 7168403 | 1295554 | similar to KIAA1713 protein                          | RGD1305869 | 307555 | 1,01 | up   |
| 6371622 | 7168403 | 1295579 | similar to KIAA1713 protein                          | RGD1305869 | 307555 | 1,01 | down |
| 6488502 | 7168403 | 1295583 | similar to KIAA1713 protein                          | RGD1305869 | 307555 | 1,54 | up   |
| 6536078 | 7168403 | 1295545 | similar to KIAA1713 protein                          | RGD1305869 | 307555 | 1,01 | up   |
| 6593058 | 7168403 | 1295560 | similar to KIAA1713 protein                          | RGD1305869 | 307555 | 1,63 | up   |
| 6603288 | 7168403 | 1295554 | similar to KIAA1713 protein                          | RGD1305869 | 307555 | 1,17 | down |
| 6682056 | 7168403 | 1295581 | similar to KIAA1713 protein                          | RGD1305869 | 307555 | 1,09 | up   |
| 6691224 | 7168403 | 1295554 | similar to KIAA1713 protein                          | RGD1305869 | 307555 | 1,11 | down |
| 6696455 | 7168403 | 1295583 | similar to KIAA1713 protein                          | RGD1305869 | 307555 | 1,39 | up   |
| 6706068 | 7168403 | 1295584 | similar to KIAA1713 protein                          | RGD1305869 | 307555 | 1,11 | up   |
| 6729968 | 7168403 | 1295579 | similar to KIAA1713 protein                          | RGD1305869 | 307555 | 1,07 | up   |
| 6741651 | 7168403 | 1295564 | similar to KIAA1713 protein                          | RGD1305869 | 307555 | 1,22 | down |
| 6743585 | 7168403 | 1295570 | similar to KIAA1713 protein                          | RGD1305869 | 307555 | 1,15 | up   |
| 5670682 | 7368002 | 1789317 | similar to lipid droplet associated protein          | LOC501283  | 501283 | 1,14 | down |
| 5704295 | 7368002 | 1789320 | similar to lipid droplet associated protein          | LOC501283  | 501283 | 1,00 | up   |
| 5819371 | 7368002 | 1789323 | similar to lipid droplet associated protein          | LOC501283  | 501283 | 1,44 | up   |
| 5843423 | 7368002 | 1789318 | similar to lipid droplet associated protein          | LOC501283  | 501283 | 1,54 | up   |
| 6097740 | 7368002 | 1789317 | similar to lipid droplet associated protein          | LOC501283  | 501283 | 1,02 | up   |
| 6108765 | 7368002 | 1789316 | similar to lipid droplet associated protein          | LOC501283  | 501283 | 1,00 | up   |
| 6142955 | 7368002 | 1789326 | similar to lipid droplet associated protein          | LOC501283  | 501283 | 1,37 | down |
| 6157009 | 7368002 | 1789323 | similar to lipid droplet associated protein          | LOC501283  | 501283 | 1,38 | down |
| 6190621 | 7368002 | 1789325 | similar to lipid droplet associated protein          | LOC501283  | 501283 | 1,15 | down |
| 6215808 | 7368002 | 1789319 | similar to lipid droplet associated protein          | LOC501283  | 501283 | 1,17 | up   |
| 6230738 | 7368002 | 1789322 | similar to lipid droplet associated protein          | LOC501283  | 501283 | 1,05 | up   |
| 6335313 | 7368002 | 1789324 | similar to lipid droplet associated protein          | LOC501283  | 501283 | 1,08 | down |
| 6518034 | 7368002 | 1789321 | similar to lipid droplet associated protein          | LOC501283  | 501283 | 2,35 | down |
| 5729999 | 7237438 | 1466789 | similar to LOC495800 protein                         | LOC499770  | 499770 | 2,18 | up   |
| 5984667 | 7237438 | 1466788 | similar to LOC495800 protein                         | LOC499770  | 499770 | 1,16 | up   |
| 6132704 | 7237438 | 1466791 | similar to LOC495800 protein                         | LOC499770  | 499770 | 1,30 | up   |
| 6290474 | 7237438 | 1466790 | similar to LOC495800 protein                         | LOC499770  | 499770 | 1,16 | down |
| 6319746 | 7237438 | 1466784 | similar to LOC495800 protein                         | LOC499770  | 499770 | 1,16 | down |
| 6360181 | 7237438 | 1466782 | similar to LOC495800 protein                         | LOC499770  | 499770 | 1,11 | up   |
| 6431041 | 7237438 | 1466785 | similar to LOC495800 protein                         | LOC499770  | 499770 | 1,01 | up   |
| 6509469 | 7237438 | 1466780 | similar to LOC495800 protein                         | LOC499770  | 499770 | 1,83 | down |
| 6544941 | 7237438 | 1466783 | similar to LOC495800 protein                         | LOC499770  | 499770 | 1,16 | up   |
| 5870715 | 7185483 | 1338939 | similar to mannose receptor precursor-like isoform 4 | RGD1559899 | 307851 | 1,38 | down |
| 5901222 | 7185483 | 1338938 | similar to mannose receptor precursor-like isoform 4 | RGD1559899 | 307851 | 1,44 | down |
| 5983680 | 7185483 | 1338941 | similar to mannose receptor precursor-like isoform 4 | RGD1559899 | 307851 | 1,08 | up   |
| 6020370 | 7185483 | 1338940 | similar to mannose receptor precursor-like isoform 4 | RGD1559899 | 307851 | 1,18 | up   |
| 6108659 | 7185483 | 1338924 | similar to mannose receptor precursor-like isoform 4 | RGD1559899 | 307851 | 1,31 | down |
| 6166139 | 7185483 | 1338936 | similar to mannose receptor precursor-like isoform 4 | RGD1559899 | 307851 | 1,10 | up   |
| 6169510 | 7185483 | 1338931 | similar to mannose receptor precursor-like isoform 4 | RGD1559899 | 307851 | 1,10 | up   |
| 6197251 | 7185483 | 1338932 | similar to mannose receptor precursor-like isoform 4 | RGD1559899 | 307851 | 1,01 | up   |
| 6269033 | 7185483 | 1338939 | similar to mannose receptor precursor-like isoform 4 | RGD1559899 | 307851 | 2,23 | down |
| 6386798 | 7185483 | 1338937 | similar to mannose receptor precursor-like isoform 4 | RGD1559899 | 307851 | 1,24 | down |
| 6448354 | 7185483 | 1338933 | similar to mannose receptor precursor-like isoform 4 | RGD1559899 | 307851 | 1,07 | up   |
| 6467796 | 7185483 | 1338930 | similar to mannose receptor precursor-like isoform 4 | RGD1559899 | 307851 | 1,10 | down |
| 6480337 | 7185483 | 1338925 | similar to mannose receptor precursor-like isoform 4 | RGD1559899 | 307851 | 1,09 | down |
| 6555014 | 7185483 | 1338935 | similar to mannose receptor precursor-like isoform 4 | RGD1559899 | 307851 | 1,30 | down |
| 6574753 | 7185483 | 1338934 | similar to mannose receptor precursor-like isoform 4 | RGD1559899 | 307851 | 1,22 | up   |
| 5748095 | 7069253 | 1054173 | similar to Map4k6-pending protein                    | LOC303259  | 303259 | 1,01 | up   |
| 5771042 | 7069253 | 1054176 | similar to Map4k6-pending protein                    | LOC303259  | 303259 | 1,47 | down |
| 5956706 | 7069253 | 1054176 | similar to Map4k6-pending protein                    | LOC303259  | 303259 | 1,06 | down |
| 6098549 | 7069253 | 1054172 | similar to Map4k6-pending protein                    | LOC303259  | 303259 | 1,06 | down |



|         |         |         |                                                                                |                      |                   |      |      |
|---------|---------|---------|--------------------------------------------------------------------------------|----------------------|-------------------|------|------|
| 6170908 | 7069253 | 1054174 | similar to Map4k6-pending protein                                              | LOC303259            | 303259            | 1,03 | up   |
| 6201792 | 7069253 | 1054172 | similar to Map4k6-pending protein                                              | LOC303259            | 303259            | 1,19 | down |
| 6235422 | 7069253 | 1054175 | similar to Map4k6-pending protein                                              | LOC303259            | 303259            | 1,08 | down |
| 6361373 | 7069253 | 1054175 | similar to Map4k6-pending protein                                              | LOC303259            | 303259            | 1,15 | down |
| 6533174 | 7069253 | 1054176 | similar to Map4k6-pending protein                                              | LOC303259            | 303259            | 1,01 | down |
| 6615881 | 7069253 | 1054176 | similar to Map4k6-pending protein                                              | LOC303259            | 303259            | 1,70 | down |
| 6665217 | 7069253 | 1054175 | similar to Map4k6-pending protein                                              | LOC303259            | 303259            | 1,24 | down |
| 5865088 | 7368954 | 1792787 | similar to MIC2 like 1                                                         | LOC680643            | 680643            | 2,32 | down |
| 6409975 | 7368804 | 1792264 | similar to MIC2 like 1                                                         | LOC681166            | 681166            | 1,07 | down |
| 5711236 | 7368804 | 1792257 | similar to MIC2 like 1 /// similar to MIC2 like 1                              | LOC681166 /// LOC363 | 681166 /// 363413 | 1,62 | down |
| 6378525 | 7368804 | 1792262 | similar to MIC2 like 1 /// similar to MIC2 like 1                              | LOC363413 /// LOC681 | 363413 /// 681166 | 1,32 | down |
| 5882913 | 7368804 | 1792263 | similar to MIC2 like 1 /// similar to nidogen 2 /// similar to nidogen 2       | LOC316873 /// LOC681 | 316873 /// 681166 | 2,30 | down |
| 5680274 | 7182133 | 1330829 | similar to Mixed lineage kinase 4                                              | RGD1306091           | 307950            | 1,30 | up   |
| 5722358 | 7182133 | 1330836 | similar to Mixed lineage kinase 4                                              | RGD1306091           | 307950            | 1,35 | up   |
| 5781080 | 7182133 | 1330839 | similar to Mixed lineage kinase 4                                              | RGD1306091           | 307950            | 1,30 | up   |
| 5873708 | 7182133 | 1330841 | similar to Mixed lineage kinase 4                                              | RGD1306091           | 307950            | 1,08 | down |
| 5879270 | 7182133 | 1330840 | similar to Mixed lineage kinase 4                                              | RGD1306091           | 307950            | 1,59 | up   |
| 6104597 | 7182133 | 1330834 | similar to Mixed lineage kinase 4                                              | RGD1306091           | 307950            | 1,05 | up   |
| 6177708 | 7182133 | 1330841 | similar to Mixed lineage kinase 4                                              | RGD1306091           | 307950            | 1,17 | up   |
| 6194801 | 7182133 | 1330835 | similar to Mixed lineage kinase 4                                              | RGD1306091           | 307950            | 1,75 | down |
| 6238354 | 7182133 | 1330838 | similar to Mixed lineage kinase 4                                              | RGD1306091           | 307950            | 1,09 | up   |
| 6251618 | 7182133 | 1330830 | similar to Mixed lineage kinase 4                                              | RGD1306091           | 307950            | 1,36 | up   |
| 6438319 | 7182133 | 1330832 | similar to Mixed lineage kinase 4                                              | RGD1306091           | 307950            | 1,14 | up   |
| 6460737 | 7182133 | 1330839 | similar to Mixed lineage kinase 4                                              | RGD1306091           | 307950            | 2,19 | down |
| 6735478 | 7182133 | 1330842 | similar to Mixed lineage kinase 4                                              | RGD1306091           | 307950            | 1,19 | up   |
| 5765095 | 7244290 | 1484169 | similar to mKIAA0256 protein                                                   | RGD1559930           | 296115            | 1,27 | down |
| 6242074 | 7244290 | 1484145 | similar to mKIAA0256 protein                                                   | RGD1559930           | 296115            | 1,51 | up   |
| 6558283 | 7132024 | 1206336 | similar to mKIAA0323 protein                                                   | RGD1565688           | 498517            | 1,15 | down |
| 5796284 | 7209927 | 1398950 | similar to mKIAA1450 protein                                                   | RGD1562174           | 310538            | 1,43 | down |
| 5837634 | 7209927 | 1398916 | similar to mKIAA1450 protein                                                   | RGD1562174           | 310538            | 1,02 | down |
| 6066258 | 7209927 | 1398944 | similar to mKIAA1450 protein                                                   | RGD1562174           | 310538            | 1,30 | up   |
| 6312026 | 7209927 | 1398916 | similar to mKIAA1450 protein                                                   | RGD1562174           | 310538            | 1,13 | down |
| 6640774 | 7209927 | 1398916 | similar to mKIAA1450 protein                                                   | RGD1562174           | 310538            | 1,18 | down |
| 5680727 | 7266725 | 1538789 | similar to mKIAA1940 protein                                                   | RGD1566130           | 312504            | 1,54 | down |
| 5741907 | 7266725 | 1538792 | similar to mKIAA1940 protein                                                   | RGD1566130           | 312504            | 1,33 | up   |
| 5748202 | 7266725 | 1538783 | similar to mKIAA1940 protein                                                   | RGD1566130           | 312504            | 1,15 | up   |
| 5816729 | 7266725 | 1538786 | similar to mKIAA1940 protein                                                   | RGD1566130           | 312504            | 1,22 | up   |
| 5859983 | 7266725 | 1538788 | similar to mKIAA1940 protein                                                   | RGD1566130           | 312504            | 1,11 | up   |
| 5880199 | 7266725 | 1538782 | similar to mKIAA1940 protein                                                   | RGD1566130           | 312504            | 1,05 | down |
| 5910723 | 7266725 | 1538791 | similar to mKIAA1940 protein                                                   | RGD1566130           | 312504            | 2,30 | up   |
| 5937077 | 7266725 | 1538788 | similar to mKIAA1940 protein                                                   | RGD1566130           | 312504            | 1,03 | down |
| 5986626 | 7266725 | 1538781 | similar to mKIAA1940 protein                                                   | RGD1566130           | 312504            | 1,03 | down |
| 6105729 | 7266725 | 1538786 | similar to mKIAA1940 protein                                                   | RGD1566130           | 312504            | 1,53 | up   |
| 6161446 | 7266725 | 1538779 | similar to mKIAA1940 protein                                                   | RGD1566130           | 312504            | 1,06 | down |
| 6194260 | 7266725 | 1538780 | similar to mKIAA1940 protein                                                   | RGD1566130           | 312504            | 1,52 | down |
| 6348720 | 7266725 | 1538790 | similar to mKIAA1940 protein                                                   | RGD1566130           | 312504            | 1,80 | down |
| 6388548 | 7266725 | 1538790 | similar to mKIAA1940 protein                                                   | RGD1566130           | 312504            | 1,14 | up   |
| 6531501 | 7266725 | 1538780 | similar to mKIAA1940 protein                                                   | RGD1566130           | 312504            | 1,63 | down |
| 6670491 | 7266725 | 1538787 | similar to mKIAA1940 protein                                                   | RGD1566130           | 312504            | 1,17 | up   |
| 5854590 | 7249503 | 1496157 | similar to Myeloid/lymphoid or mixed-lineage leukemia protein 3 homolog (Histo | LOC502710            | 502710            | 1,19 | up   |
| 6083625 | 7249503 | 1496206 | similar to Myeloid/lymphoid or mixed-lineage leukemia protein 3 homolog (Histo | LOC502710            | 502710            | 1,27 | up   |
| 6105382 | 7249503 | 1496240 | similar to Myeloid/lymphoid or mixed-lineage leukemia protein 3 homolog (Histo | LOC502710            | 502710            | 1,50 | down |
| 6186346 | 7249503 | 1496240 | similar to Myeloid/lymphoid or mixed-lineage leukemia protein 3 homolog (Histo | LOC502710            | 502710            | 1,21 | up   |
| 6385650 | 7249503 | 1496240 | similar to Myeloid/lymphoid or mixed-lineage leukemia protein 3 homolog (Histo | LOC502710            | 502710            | 1,18 | up   |
| 6746756 | 7249503 | 1496240 | similar to Myeloid/lymphoid or mixed-lineage leukemia protein 3 homolog (Histo | LOC502710            | 502710            | 1,42 | up   |
| 5627032 | 7228530 | 1443849 | similar to myosin IIIB                                                         | RGD1560313           | 366069            | 1,47 | down |

|         |         |         |                                                 |                    |                   |      |      |
|---------|---------|---------|-------------------------------------------------|--------------------|-------------------|------|------|
| 5654656 | 7228530 | 1443843 | similar to myosin IIIB                          | RGD1560313         | 366069            | 1,82 | down |
| 5666998 | 7228530 | 1443862 | similar to myosin IIIB                          | RGD1560313         | 366069            | 1,09 | down |
| 5750818 | 7228530 | 1443840 | similar to myosin IIIB                          | RGD1560313         | 366069            | 1,03 | up   |
| 5784543 | 7228530 | 1443861 | similar to myosin IIIB                          | RGD1560313         | 366069            | 1,19 | up   |
| 5856900 | 7228530 | 1443842 | similar to myosin IIIB                          | RGD1560313         | 366069            | 1,01 | up   |
| 5915824 | 7228530 | 1443838 | similar to myosin IIIB                          | RGD1560313         | 366069            | 1,03 | up   |
| 5935940 | 7228530 | 1443831 | similar to myosin IIIB                          | RGD1560313         | 366069            | 1,42 | down |
| 5964261 | 7228530 | 1443839 | similar to myosin IIIB                          | RGD1560313         | 366069            | 1,03 | up   |
| 5971989 | 7228530 | 1443837 | similar to myosin IIIB                          | RGD1560313         | 366069            | 1,36 | down |
| 6063262 | 7228530 | 1443851 | similar to myosin IIIB                          | RGD1560313         | 366069            | 1,19 | up   |
| 6142890 | 7228530 | 1443798 | similar to myosin IIIB                          | RGD1560313         | 366069            | 1,06 | up   |
| 6153238 | 7228530 | 1443827 | similar to myosin IIIB                          | RGD1560313         | 366069            | 1,38 | down |
| 6167395 | 7228530 | 1443836 | similar to myosin IIIB                          | RGD1560313         | 366069            | 2,02 | down |
| 6235720 | 7228530 | 1443852 | similar to myosin IIIB                          | RGD1560313         | 366069            | 2,30 | down |
| 6242648 | 7228530 | 1443794 | similar to myosin IIIB                          | RGD1560313         | 366069            | 1,30 | up   |
| 6257953 | 7228530 | 1443845 | similar to myosin IIIB                          | RGD1560313         | 366069            | 1,25 | down |
| 6319405 | 7228530 | 1443883 | similar to myosin IIIB                          | RGD1560313         | 366069            | 1,03 | down |
| 6359066 | 7228530 | 1443868 | similar to myosin IIIB                          | RGD1560313         | 366069            | 1,15 | down |
| 6360824 | 7228530 | 1443791 | similar to myosin IIIB                          | RGD1560313         | 366069            | 1,32 | down |
| 6389021 | 7228530 | 1443881 | similar to myosin IIIB                          | RGD1560313         | 366069            | 1,04 | up   |
| 6417175 | 7228530 | 1443870 | similar to myosin IIIB                          | RGD1560313         | 366069            | 1,16 | down |
| 6419051 | 7228530 | 1443859 | similar to myosin IIIB                          | RGD1560313         | 366069            | 1,58 | down |
| 6440850 | 7228530 | 1443809 | similar to myosin IIIB                          | RGD1560313         | 366069            | 1,14 | up   |
| 6443882 | 7228530 | 1443790 | similar to myosin IIIB                          | RGD1560313         | 366069            | 1,05 | up   |
| 6487742 | 7228530 | 1443867 | similar to myosin IIIB                          | RGD1560313         | 366069            | 1,05 | down |
| 6494680 | 7228530 | 1443850 | similar to myosin IIIB                          | RGD1560313         | 366069            | 1,01 | down |
| 6498536 | 7228530 | 1443795 | similar to myosin IIIB                          | RGD1560313         | 366069            | 1,20 | up   |
| 6586789 | 7228530 | 1443847 | similar to myosin IIIB                          | RGD1560313         | 366069            | 1,08 | down |
| 6640168 | 7228530 | 1443790 | similar to myosin IIIB                          | RGD1560313         | 366069            | 1,14 | up   |
| 5792043 | 7069830 | 1055595 | similar to myosin XVIIIa                        | LOC360570          | 360570            | 1,04 | down |
| 5918849 | 7069830 | 1055663 | similar to myosin XVIIIa                        | LOC360570          | 360570            | 1,05 | down |
| 5933822 | 7069830 | 1055663 | similar to myosin XVIIIa                        | LOC360570          | 360570            | 1,49 | down |
| 6015243 | 7069830 | 1055652 | similar to myosin XVIIIa                        | LOC360570          | 360570            | 1,10 | up   |
| 6037797 | 7069830 | 1055663 | similar to myosin XVIIIa                        | LOC360570          | 360570            | 1,43 | up   |
| 6384988 | 7069830 | 1055663 | similar to myosin XVIIIa                        | LOC360570          | 360570            | 1,07 | down |
| 6430178 | 7069830 | 1055650 | similar to myosin XVIIIa                        | LOC360570          | 360570            | 1,17 | down |
| 6523137 | 7069830 | 1055653 | similar to myosin XVIIIa                        | LOC360570          | 360570            | 1,06 | down |
| 6544610 | 7069830 | 1055651 | similar to myosin XVIIIa                        | LOC360570          | 360570            | 1,05 | down |
| 6652890 | 7069830 | 1055586 | similar to myosin XVIIIa                        | LOC360570          | 360570            | 3,36 | down |
| 6732161 | 7069830 | 1055660 | similar to myosin XVIIIa                        | LOC360570          | 360570            | 1,07 | down |
| 5623886 | 7040238 | 985995  | similar to Nicotinamide riboside kinase 1       | LOC499330          | 499330            | 1,12 | up   |
| 5672191 | 7040238 | 985991  | similar to Nicotinamide riboside kinase 1       | LOC499330          | 499330            | 1,16 | down |
| 5784473 | 7040238 | 985995  | similar to Nicotinamide riboside kinase 1       | LOC499330          | 499330            | 1,07 | up   |
| 5846468 | 7040238 | 985990  | similar to Nicotinamide riboside kinase 1       | LOC499330          | 499330            | 1,52 | down |
| 6017130 | 7040238 | 985992  | similar to Nicotinamide riboside kinase 1       | LOC499330          | 499330            | 2,05 | up   |
| 6020644 | 7040238 | 985988  | similar to Nicotinamide riboside kinase 1       | LOC499330          | 499330            | 1,34 | down |
| 6071510 | 7040238 | 985993  | similar to Nicotinamide riboside kinase 1       | LOC499330          | 499330            | 1,51 | up   |
| 6089416 | 7040238 | 985989  | similar to Nicotinamide riboside kinase 1       | LOC499330          | 499330            | 1,76 | down |
| 6327948 | 7040238 | 985988  | similar to Nicotinamide riboside kinase 1       | LOC499330          | 499330            | 1,10 | up   |
| 6586298 | 7040238 | 985994  | similar to Nicotinamide riboside kinase 1       | LOC499330          | 499330            | 1,13 | up   |
| 5869275 | 7368804 | 1792226 | similar to nidogen 2                            | LOC365085          | 365085            | 1,08 | down |
| 6067129 | 7368804 | 1792251 | similar to nidogen 2                            | LOC503361          | 503361            | 3,19 | up   |
| 6410320 | 7369166 | 1793380 | similar to nidogen 2                            | LOC305771          | 305771            | 1,71 | down |
| 5683733 | 7367748 | 1788252 | similar to nidogen 2 /// similar to MIC2 like 1 | 3317070 /// LOC691 | 317070 /// 691241 | 2,22 | up   |
| 5761116 | 7367748 | 1788255 | similar to nidogen 2 /// similar to MIC2 like 1 | 3317070 /// LOC691 | 317070 /// 691241 | 1,90 | up   |
| 5773007 | 7367748 | 1788251 | similar to nidogen 2 /// similar to MIC2 like 1 | 3317070 /// LOC691 | 317070 /// 691241 | 1,29 | down |

|         |         |         |                                                                                          |                                            |      |      |
|---------|---------|---------|------------------------------------------------------------------------------------------|--------------------------------------------|------|------|
| 6502800 | 7367748 | 1788256 | similar to nidogen 2 /// similar to MIC2 like 1                                          | 3317070 /// LOC691 317070 /// 691241       | 1,20 | down |
| 6324867 | 7367748 | 1788253 | similar to nidogen 2 /// similar to MIC2 like 1 /// similar to MIC2 like 1               | ) /// LOC691241 /// D70 /// 691241 /// 688 | 1,02 | down |
| 5926408 | 7368804 | 1792251 | similar to nidogen 2 /// similar to nidogen 2                                            | 3680933 /// LOC503 680933 /// 503361       | 1,04 | up   |
| 6253006 | 7368804 | 1792251 | similar to nidogen 2 /// similar to nidogen 2                                            | 3680933 /// LOC503 680933 /// 503361       | 2,23 | up   |
| 6545566 | 7368804 | 1792226 | similar to nidogen 2 /// similar to nidogen 2 /// similar to nidogen 2 protein /// simi3 | 316873 /// RGD156/ 316873 /// 498627 /     | 1,49 | up   |
| 6069623 | 7369166 | 1793379 | similar to nidogen 2 /// similar to nidogen 2 protein /// similar to nidogen 2 /// simi6 | /// LOC503391 /// 527 /// 503391 /// 305   | 1,39 | up   |
| 5688653 | 7369129 | 1793271 | similar to nidogen 2 protein                                                             | LOC367622 367622                           | 1,45 | down |
| 6241816 | 7369129 | 1793271 | similar to nidogen 2 protein                                                             | LOC367622 367622                           | 3,03 | up   |
| 6267603 | 7368986 | 1792861 | similar to nidogen 2 protein                                                             | LOC302022 302022                           | 1,74 | up   |
| 6298090 | 7368986 | 1792855 | similar to nidogen 2 protein                                                             | LOC302022 302022                           | 1,35 | up   |
| 6312202 | 7368986 | 1792861 | similar to nidogen 2 protein                                                             | LOC302022 302022                           | 2,11 | up   |
| 6351415 | 7368986 | 1792857 | similar to nidogen 2 protein                                                             | LOC302022 302022                           | 1,09 | down |
| 6500159 | 7355804 | 1759432 | similar to Nol5a_predicted protein                                                       | RGD1563521 501161                          | 2,24 | down |
| 5743876 | 7281507 | 1576702 | similar to novel protein                                                                 | RGD1563533 313713                          | 1,21 | up   |
| 5753541 | 7281507 | 1576704 | similar to novel protein                                                                 | RGD1563533 313713                          | 1,08 | up   |
| 5772660 | 7281507 | 1576709 | similar to novel protein                                                                 | RGD1563533 313713                          | 1,03 | down |
| 5851351 | 7127540 | 1195302 | similar to novel protein                                                                 | RGD1560636 305467                          | 1,44 | down |
| 5931345 | 7281507 | 1576708 | similar to novel protein                                                                 | RGD1563533 313713                          | 1,12 | down |
| 5938671 | 7281507 | 1576717 | similar to novel protein                                                                 | RGD1563533 313713                          | 1,02 | up   |
| 5940277 | 7281507 | 1576711 | similar to novel protein                                                                 | RGD1563533 313713                          | 1,39 | up   |
| 5978269 | 7070616 | 1057766 | similar to novel protein                                                                 | RGD1559961 497974                          | 1,13 | up   |
| 6017696 | 7070616 | 1057768 | similar to novel protein                                                                 | RGD1559961 497974                          | 1,23 | down |
| 6019979 | 7281507 | 1576717 | similar to novel protein                                                                 | RGD1563533 313713                          | 1,02 | up   |
| 6071284 | 7281507 | 1576705 | similar to novel protein                                                                 | RGD1563533 313713                          | 1,04 | down |
| 6101075 | 7281507 | 1576715 | similar to novel protein                                                                 | RGD1563533 313713                          | 2,16 | up   |
| 6127246 | 7070616 | 1057767 | similar to novel protein                                                                 | RGD1559961 497974                          | 1,04 | up   |
| 6135988 | 7281507 | 1576715 | similar to novel protein                                                                 | RGD1563533 313713                          | 1,05 | down |
| 6147284 | 7281507 | 1576706 | similar to novel protein                                                                 | RGD1563533 313713                          | 1,01 | up   |
| 6200230 | 7281507 | 1576703 | similar to novel protein                                                                 | RGD1563533 313713                          | 1,24 | down |
| 6274360 | 7281507 | 1576717 | similar to novel protein                                                                 | RGD1563533 313713                          | 1,46 | up   |
| 6355415 | 7070616 | 1057768 | similar to novel protein                                                                 | RGD1559961 497974                          | 1,08 | up   |
| 6358321 | 7281507 | 1576713 | similar to novel protein                                                                 | RGD1563533 313713                          | 1,72 | down |
| 6394424 | 7281507 | 1576707 | similar to novel protein                                                                 | RGD1563533 313713                          | 1,85 | down |
| 6488695 | 7281507 | 1576712 | similar to novel protein                                                                 | RGD1563533 313713                          | 1,28 | up   |
| 6515926 | 7281507 | 1576714 | similar to novel protein                                                                 | RGD1563533 313713                          | 1,24 | down |
| 6599137 | 7281507 | 1576700 | similar to novel protein                                                                 | RGD1563533 313713                          | 1,39 | up   |
| 6604597 | 7070616 | 1057798 | similar to novel protein                                                                 | RGD1559961 497974                          | 1,04 | down |
| 6629650 | 7281507 | 1576696 | similar to novel protein                                                                 | RGD1563533 313713                          | 1,79 | up   |
| 6668526 | 7281507 | 1576701 | similar to novel protein                                                                 | RGD1563533 313713                          | 1,15 | up   |
| 6700832 | 7281507 | 1576711 | similar to novel protein                                                                 | RGD1563533 313713                          | 1,52 | down |
| 6704468 | 7281507 | 1576717 | similar to novel protein                                                                 | RGD1563533 313713                          | 1,11 | up   |
| 6139778 | 7336931 | 1711897 | similar to Nuclear membrane binding protein NUCLING                                      | RGD1560011 315732                          | 1,04 | up   |
| 6614091 | 7336931 | 1711844 | similar to Nuclear membrane binding protein NUCLING                                      | RGD1560011 315732                          | 1,55 | up   |
| 6662705 | 7336931 | 1711844 | similar to Nuclear membrane binding protein NUCLING                                      | RGD1560011 315732                          | 1,13 | down |
| 5765666 | 7258784 | 1519668 | similar to nuclear receptor interacting protein 2                                        | LOC689619 689619                           | 1,72 | down |
| 5857199 | 7159177 | 1273330 | similar to Nucleolar GTP-binding protein 1 (Chronic renal failure gene protein) (G       | LOC683324 683324                           | 1,24 | down |
| 6408729 | 7159177 | 1273330 | similar to Nucleolar GTP-binding protein 1 (Chronic renal failure gene protein) (G       | LOC683324 683324                           | 1,84 | up   |
| 5636754 | 7258812 | 1519707 | similar to osteoclast inhibitory lectin                                                  | LOC500331 500331                           | 1,08 | down |
| 5697218 | 7258812 | 1519708 | similar to osteoclast inhibitory lectin                                                  | LOC500331 500331                           | 1,02 | down |
| 5811342 | 7258812 | 1519709 | similar to osteoclast inhibitory lectin                                                  | LOC500331 500331                           | 1,12 | up   |
| 5922051 | 7258812 | 1519705 | similar to osteoclast inhibitory lectin                                                  | LOC500331 500331                           | 1,18 | up   |
| 5999781 | 7258812 | 1519706 | similar to osteoclast inhibitory lectin                                                  | LOC500331 500331                           | 1,02 | up   |
| 6148964 | 7258812 | 1519704 | similar to osteoclast inhibitory lectin                                                  | LOC500331 500331                           | 1,35 | down |
| 6159588 | 7258812 | 1519703 | similar to osteoclast inhibitory lectin                                                  | LOC500331 500331                           | 1,19 | down |
| 6427881 | 7258812 | 1519709 | similar to osteoclast inhibitory lectin                                                  | LOC500331 500331                           | 2,06 | up   |
| 5709090 | 7073950 | 1065942 | similar to p150 target of rapamycin (TOR)-scaffold protein containing WD-repeat          | RGD1311784 287871                          | 1,23 | up   |

|         |         |         |                                                                                 |            |        |      |      |
|---------|---------|---------|---------------------------------------------------------------------------------|------------|--------|------|------|
| 5731767 | 7073950 | 1065920 | similar to p150 target of rapamycin (TOR)-scaffold protein containing WD-repeat | RGD1311784 | 287871 | 1,01 | down |
| 5804373 | 7073950 | 1065869 | similar to p150 target of rapamycin (TOR)-scaffold protein containing WD-repeat | RGD1311784 | 287871 | 1,08 | up   |
| 5901919 | 7073950 | 1065880 | similar to p150 target of rapamycin (TOR)-scaffold protein containing WD-repeat | RGD1311784 | 287871 | 1,24 | up   |
| 5935683 | 7073950 | 1065911 | similar to p150 target of rapamycin (TOR)-scaffold protein containing WD-repeat | RGD1311784 | 287871 | 1,11 | down |
| 5962002 | 7073950 | 1065905 | similar to p150 target of rapamycin (TOR)-scaffold protein containing WD-repeat | RGD1311784 | 287871 | 1,14 | down |
| 6026146 | 7073950 | 1065887 | similar to p150 target of rapamycin (TOR)-scaffold protein containing WD-repeat | RGD1311784 | 287871 | 1,16 | up   |
| 6034361 | 7073950 | 1065910 | similar to p150 target of rapamycin (TOR)-scaffold protein containing WD-repeat | RGD1311784 | 287871 | 1,28 | up   |
| 6044187 | 7073950 | 1065908 | similar to p150 target of rapamycin (TOR)-scaffold protein containing WD-repeat | RGD1311784 | 287871 | 1,03 | down |
| 6052395 | 7073950 | 1065934 | similar to p150 target of rapamycin (TOR)-scaffold protein containing WD-repeat | RGD1311784 | 287871 | 1,10 | down |
| 6067154 | 7073950 | 1065897 | similar to p150 target of rapamycin (TOR)-scaffold protein containing WD-repeat | RGD1311784 | 287871 | 1,21 | down |
| 6087409 | 7073950 | 1065859 | similar to p150 target of rapamycin (TOR)-scaffold protein containing WD-repeat | RGD1311784 | 287871 | 1,12 | up   |
| 6128465 | 7073950 | 1065928 | similar to p150 target of rapamycin (TOR)-scaffold protein containing WD-repeat | RGD1311784 | 287871 | 1,07 | up   |
| 6136527 | 7073950 | 1065935 | similar to p150 target of rapamycin (TOR)-scaffold protein containing WD-repeat | RGD1311784 | 287871 | 1,02 | down |
| 6149640 | 7073950 | 1065932 | similar to p150 target of rapamycin (TOR)-scaffold protein containing WD-repeat | RGD1311784 | 287871 | 1,45 | down |
| 6156404 | 7073950 | 1065926 | similar to p150 target of rapamycin (TOR)-scaffold protein containing WD-repeat | RGD1311784 | 287871 | 1,26 | down |
| 6208150 | 7073950 | 1065922 | similar to p150 target of rapamycin (TOR)-scaffold protein containing WD-repeat | RGD1311784 | 287871 | 1,04 | up   |
| 6222995 | 7073950 | 1065921 | similar to p150 target of rapamycin (TOR)-scaffold protein containing WD-repeat | RGD1311784 | 287871 | 1,13 | up   |
| 6234052 | 7073950 | 1065919 | similar to p150 target of rapamycin (TOR)-scaffold protein containing WD-repeat | RGD1311784 | 287871 | 1,30 | down |
| 6257721 | 7073950 | 1065940 | similar to p150 target of rapamycin (TOR)-scaffold protein containing WD-repeat | RGD1311784 | 287871 | 1,21 | up   |
| 6274928 | 7073950 | 1065942 | similar to p150 target of rapamycin (TOR)-scaffold protein containing WD-repeat | RGD1311784 | 287871 | 1,07 | down |
| 6276324 | 7073950 | 1065923 | similar to p150 target of rapamycin (TOR)-scaffold protein containing WD-repeat | RGD1311784 | 287871 | 1,07 | down |
| 6311837 | 7073950 | 1065933 | similar to p150 target of rapamycin (TOR)-scaffold protein containing WD-repeat | RGD1311784 | 287871 | 1,05 | up   |
| 6314912 | 7073950 | 1065912 | similar to p150 target of rapamycin (TOR)-scaffold protein containing WD-repeat | RGD1311784 | 287871 | 1,08 | down |
| 6332958 | 7073950 | 1065931 | similar to p150 target of rapamycin (TOR)-scaffold protein containing WD-repeat | RGD1311784 | 287871 | 1,26 | down |
| 6421073 | 7073950 | 1065904 | similar to p150 target of rapamycin (TOR)-scaffold protein containing WD-repeat | RGD1311784 | 287871 | 1,15 | up   |
| 6448715 | 7073950 | 1065938 | similar to p150 target of rapamycin (TOR)-scaffold protein containing WD-repeat | RGD1311784 | 287871 | 1,24 | down |
| 6459402 | 7073950 | 1065936 | similar to p150 target of rapamycin (TOR)-scaffold protein containing WD-repeat | RGD1311784 | 287871 | 1,06 | down |
| 6462729 | 7073950 | 1065883 | similar to p150 target of rapamycin (TOR)-scaffold protein containing WD-repeat | RGD1311784 | 287871 | 1,04 | up   |
| 6506304 | 7073950 | 1065941 | similar to p150 target of rapamycin (TOR)-scaffold protein containing WD-repeat | RGD1311784 | 287871 | 1,19 | down |
| 6513787 | 7073950 | 1065868 | similar to p150 target of rapamycin (TOR)-scaffold protein containing WD-repeat | RGD1311784 | 287871 | 1,05 | up   |
| 6557420 | 7073950 | 1065938 | similar to p150 target of rapamycin (TOR)-scaffold protein containing WD-repeat | RGD1311784 | 287871 | 1,27 | down |
| 6593721 | 7073950 | 1065942 | similar to p150 target of rapamycin (TOR)-scaffold protein containing WD-repeat | RGD1311784 | 287871 | 1,62 | down |
| 6610116 | 7073950 | 1065918 | similar to p150 target of rapamycin (TOR)-scaffold protein containing WD-repeat | RGD1311784 | 287871 | 1,12 | down |
| 6706686 | 7073950 | 1065939 | similar to p150 target of rapamycin (TOR)-scaffold protein containing WD-repeat | RGD1311784 | 287871 | 1,26 | down |
| 6713475 | 7073950 | 1065924 | similar to p150 target of rapamycin (TOR)-scaffold protein containing WD-repeat | RGD1311784 | 287871 | 1,14 | down |
| 6727379 | 7073950 | 1065930 | similar to p150 target of rapamycin (TOR)-scaffold protein containing WD-repeat | RGD1311784 | 287871 | 1,01 | down |
| 5782620 | 7371483 | 1800146 | similar to peptidylprolyl isomerase (cyclophilin)-like 2                        | LOC362758  | 362758 | 1,20 | up   |
| 6333494 | 7371483 | 1800146 | similar to peptidylprolyl isomerase (cyclophilin)-like 2                        | LOC362758  | 362758 | 3,72 | down |
| 6472274 | 7371483 | 1800146 | similar to peptidylprolyl isomerase (cyclophilin)-like 2                        | LOC362758  | 362758 | 1,04 | down |
| 5620662 | 7299785 | 1621348 | similar to pleckstrin homology domain protein (5V327)                           | RGD1566112 | 500685 | 1,09 | down |
| 5642875 | 7299785 | 1621335 | similar to pleckstrin homology domain protein (5V327)                           | RGD1566112 | 500685 | 1,03 | down |
| 5656662 | 7299785 | 1621354 | similar to pleckstrin homology domain protein (5V327)                           | RGD1566112 | 500685 | 1,04 | up   |
| 5857965 | 7299785 | 1621353 | similar to pleckstrin homology domain protein (5V327)                           | RGD1566112 | 500685 | 1,15 | up   |
| 5861489 | 7299785 | 1621349 | similar to pleckstrin homology domain protein (5V327)                           | RGD1566112 | 500685 | 1,04 | up   |
| 5865111 | 7299785 | 1621340 | similar to pleckstrin homology domain protein (5V327)                           | RGD1566112 | 500685 | 1,06 | down |
| 5929669 | 7299785 | 1621343 | similar to pleckstrin homology domain protein (5V327)                           | RGD1566112 | 500685 | 1,11 | down |
| 5959374 | 7299785 | 1621351 | similar to pleckstrin homology domain protein (5V327)                           | RGD1566112 | 500685 | 1,12 | up   |
| 6016700 | 7299785 | 1621350 | similar to pleckstrin homology domain protein (5V327)                           | RGD1566112 | 500685 | 1,32 | up   |
| 6040731 | 7299785 | 1621355 | similar to pleckstrin homology domain protein (5V327)                           | RGD1566112 | 500685 | 1,29 | up   |
| 6170290 | 7299785 | 1621336 | similar to pleckstrin homology domain protein (5V327)                           | RGD1566112 | 500685 | 1,00 | up   |
| 6262135 | 7299785 | 1621347 | similar to pleckstrin homology domain protein (5V327)                           | RGD1566112 | 500685 | 2,12 | down |
| 6421490 | 7299785 | 1621341 | similar to pleckstrin homology domain protein (5V327)                           | RGD1566112 | 500685 | 1,06 | down |
| 6507334 | 7299785 | 1621342 | similar to pleckstrin homology domain protein (5V327)                           | RGD1566112 | 500685 | 1,01 | up   |
| 6603388 | 7299785 | 1621344 | similar to pleckstrin homology domain protein (5V327)                           | RGD1566112 | 500685 | 1,61 | down |
| 5655511 | 7271213 | 1550641 | similar to Protein C12orf11 (Sarcoma antigen NY-SAR-95)                         | LOC690728  | 690728 | 1,07 | down |
| 5695952 | 7271213 | 1550640 | similar to Protein C12orf11 (Sarcoma antigen NY-SAR-95)                         | LOC690728  | 690728 | 1,07 | up   |

|         |         |         |                                                         |           |        |      |      |
|---------|---------|---------|---------------------------------------------------------|-----------|--------|------|------|
| 5740507 | 7271213 | 1550637 | similar to Protein C12orf11 (Sarcoma antigen NY-SAR-95) | LOC690728 | 690728 | 1,08 | up   |
| 5756192 | 7271213 | 1550657 | similar to Protein C12orf11 (Sarcoma antigen NY-SAR-95) | LOC690728 | 690728 | 1,43 | up   |
| 5763743 | 7271213 | 1550634 | similar to Protein C12orf11 (Sarcoma antigen NY-SAR-95) | LOC690728 | 690728 | 1,03 | down |
| 5840824 | 7271213 | 1550642 | similar to Protein C12orf11 (Sarcoma antigen NY-SAR-95) | LOC690728 | 690728 | 1,19 | down |
| 5921950 | 7271213 | 1550649 | similar to Protein C12orf11 (Sarcoma antigen NY-SAR-95) | LOC690728 | 690728 | 1,09 | up   |
| 5990315 | 7271213 | 1550645 | similar to Protein C12orf11 (Sarcoma antigen NY-SAR-95) | LOC690728 | 690728 | 1,12 | down |
| 5990632 | 7271213 | 1550654 | similar to Protein C12orf11 (Sarcoma antigen NY-SAR-95) | LOC690728 | 690728 | 1,10 | down |
| 6084598 | 7271213 | 1550657 | similar to Protein C12orf11 (Sarcoma antigen NY-SAR-95) | LOC690728 | 690728 | 1,03 | up   |
| 6194168 | 7271213 | 1550633 | similar to Protein C12orf11 (Sarcoma antigen NY-SAR-95) | LOC690728 | 690728 | 1,53 | up   |
| 6204852 | 7271213 | 1550639 | similar to Protein C12orf11 (Sarcoma antigen NY-SAR-95) | LOC690728 | 690728 | 1,03 | down |
| 6211195 | 7271213 | 1550646 | similar to Protein C12orf11 (Sarcoma antigen NY-SAR-95) | LOC690728 | 690728 | 1,05 | down |
| 6267249 | 7271213 | 1550648 | similar to Protein C12orf11 (Sarcoma antigen NY-SAR-95) | LOC690728 | 690728 | 1,01 | up   |
| 6278673 | 7271213 | 1550635 | similar to Protein C12orf11 (Sarcoma antigen NY-SAR-95) | LOC690728 | 690728 | 1,20 | up   |
| 6406844 | 7271213 | 1550633 | similar to Protein C12orf11 (Sarcoma antigen NY-SAR-95) | LOC690728 | 690728 | 2,04 | down |
| 6561766 | 7271213 | 1550638 | similar to Protein C12orf11 (Sarcoma antigen NY-SAR-95) | LOC690728 | 690728 | 1,31 | down |
| 6571243 | 7271213 | 1550643 | similar to Protein C12orf11 (Sarcoma antigen NY-SAR-95) | LOC690728 | 690728 | 1,02 | down |
| 6639670 | 7271213 | 1550656 | similar to Protein C12orf11 (Sarcoma antigen NY-SAR-95) | LOC690728 | 690728 | 1,04 | down |
| 6696571 | 7271213 | 1550636 | similar to Protein C12orf11 (Sarcoma antigen NY-SAR-95) | LOC690728 | 690728 | 1,03 | down |
| 5755827 | 7044476 | 996987  | similar to Protein C6orf115                             | LOC685045 | 685045 | 2,39 | up   |
| 5880110 | 7044476 | 996987  | similar to Protein C6orf115                             | LOC685045 | 685045 | 1,03 | down |
| 6128306 | 7044476 | 996987  | similar to Protein C6orf115                             | LOC685045 | 685045 | 1,70 | down |
| 6390909 | 7044476 | 996987  | similar to Protein C6orf115                             | LOC685045 | 685045 | 1,26 | up   |
| 6501754 | 7044476 | 996987  | similar to Protein C6orf115                             | LOC685045 | 685045 | 1,05 | down |
| 6543008 | 7044476 | 996986  | similar to Protein C6orf115                             | LOC685045 | 685045 | 1,18 | down |
| 5774428 | 7238202 | 1468958 | similar to Protein C9orf126 homolog                     | LOC690538 | 690538 | 1,22 | down |
| 5802890 | 7238202 | 1468938 | similar to Protein C9orf126 homolog                     | LOC690538 | 690538 | 1,05 | down |
| 6395864 | 7238202 | 1468959 | similar to Protein C9orf126 homolog                     | LOC690538 | 690538 | 1,01 | up   |
| 5757182 | 7052331 | 1014574 | similar to Protein KIAA0574                             | LOC680344 | 680344 | 1,30 | up   |
| 5869621 | 7052331 | 1014590 | similar to Protein KIAA0574                             | LOC680344 | 680344 | 2,02 | down |
| 6215776 | 7052331 | 1014578 | similar to Protein KIAA0574                             | LOC680344 | 680344 | 1,09 | down |
| 6311044 | 7052331 | 1014577 | similar to Protein KIAA0574                             | LOC680344 | 680344 | 1,30 | up   |
| 6393728 | 7052331 | 1014572 | similar to Protein KIAA0574                             | LOC680344 | 680344 | 1,04 | down |
| 6642100 | 7052331 | 1014578 | similar to Protein KIAA0574                             | LOC680344 | 680344 | 1,04 | down |
| 6677122 | 7052331 | 1014581 | similar to Protein KIAA0574                             | LOC680344 | 680344 | 1,54 | up   |
| 5684617 | 7299083 | 1619244 | similar to Protein KIAA0586                             | LOC690035 | 690035 | 1,17 | down |
| 5769924 | 7299083 | 1619235 | similar to Protein KIAA0586                             | LOC690035 | 690035 | 1,15 | down |
| 5777080 | 7299083 | 1619251 | similar to Protein KIAA0586                             | LOC690035 | 690035 | 1,07 | down |
| 5823360 | 7299083 | 1619264 | similar to Protein KIAA0586                             | LOC690035 | 690035 | 1,26 | up   |
| 5835106 | 7299083 | 1619253 | similar to Protein KIAA0586                             | LOC690035 | 690035 | 3,23 | down |
| 5876086 | 7299083 | 1619256 | similar to Protein KIAA0586                             | LOC690035 | 690035 | 1,76 | down |
| 5895625 | 7299083 | 1619249 | similar to Protein KIAA0586                             | LOC690035 | 690035 | 1,10 | down |
| 5936142 | 7299083 | 1619254 | similar to Protein KIAA0586                             | LOC690035 | 690035 | 1,07 | down |
| 5981189 | 7299083 | 1619264 | similar to Protein KIAA0586                             | LOC690035 | 690035 | 1,11 | up   |
| 6069061 | 7299083 | 1619234 | similar to Protein KIAA0586                             | LOC690035 | 690035 | 1,36 | up   |
| 6136705 | 7299083 | 1619240 | similar to Protein KIAA0586                             | LOC690035 | 690035 | 1,06 | up   |
| 6147437 | 7299083 | 1619258 | similar to Protein KIAA0586                             | LOC690035 | 690035 | 1,21 | up   |
| 6152385 | 7299083 | 1619255 | similar to Protein KIAA0586                             | LOC690035 | 690035 | 1,25 | down |
| 6177371 | 7299083 | 1619248 | similar to Protein KIAA0586                             | LOC690035 | 690035 | 1,46 | down |
| 6190418 | 7299083 | 1619255 | similar to Protein KIAA0586                             | LOC690035 | 690035 | 1,37 | down |
| 6194376 | 7299083 | 1619243 | similar to Protein KIAA0586                             | LOC690035 | 690035 | 1,12 | up   |
| 6219494 | 7299083 | 1619243 | similar to Protein KIAA0586                             | LOC690035 | 690035 | 1,03 | down |
| 6222177 | 7299083 | 1619241 | similar to Protein KIAA0586                             | LOC690035 | 690035 | 1,09 | down |
| 6223190 | 7299083 | 1619233 | similar to Protein KIAA0586                             | LOC690035 | 690035 | 1,27 | down |
| 6253617 | 7299083 | 1619231 | similar to Protein KIAA0586                             | LOC690035 | 690035 | 1,15 | down |
| 6257990 | 7299083 | 1619229 | similar to Protein KIAA0586                             | LOC690035 | 690035 | 1,51 | up   |
| 6283837 | 7299083 | 1619257 | similar to Protein KIAA0586                             | LOC690035 | 690035 | 1,13 | down |

|         |         |         |                                                                                   |            |        |      |      |
|---------|---------|---------|-----------------------------------------------------------------------------------|------------|--------|------|------|
| 6335696 | 7299083 | 1619247 | similar to Protein KIAA0586                                                       | LOC690035  | 690035 | 1,05 | down |
| 6361549 | 7299083 | 1619237 | similar to Protein KIAA0586                                                       | LOC690035  | 690035 | 1,19 | up   |
| 6406353 | 7299083 | 1619239 | similar to Protein KIAA0586                                                       | LOC690035  | 690035 | 1,17 | down |
| 6408708 | 7299083 | 1619240 | similar to Protein KIAA0586                                                       | LOC690035  | 690035 | 1,38 | up   |
| 6415418 | 7299083 | 1619251 | similar to Protein KIAA0586                                                       | LOC690035  | 690035 | 1,14 | down |
| 6421236 | 7299083 | 1619232 | similar to Protein KIAA0586                                                       | LOC690035  | 690035 | 1,59 | up   |
| 6423749 | 7299083 | 1619245 | similar to Protein KIAA0586                                                       | LOC690035  | 690035 | 1,10 | down |
| 6453549 | 7299083 | 1619238 | similar to Protein KIAA0586                                                       | LOC690035  | 690035 | 1,08 | down |
| 6462311 | 7299083 | 1619243 | similar to Protein KIAA0586                                                       | LOC690035  | 690035 | 1,14 | up   |
| 6598402 | 7299083 | 1619236 | similar to Protein KIAA0586                                                       | LOC690035  | 690035 | 1,24 | down |
| 6683628 | 7299083 | 1619252 | similar to Protein KIAA0586                                                       | LOC690035  | 690035 | 1,15 | up   |
| 6722488 | 7299083 | 1619242 | similar to Protein KIAA0586                                                       | LOC690035  | 690035 | 1,25 | up   |
| 6736477 | 7299083 | 1619238 | similar to Protein KIAA0586                                                       | LOC690035  | 690035 | 1,09 | down |
| 6742161 | 7299083 | 1619228 | similar to Protein KIAA0586                                                       | LOC690035  | 690035 | 1,14 | down |
| 6119078 | 7156052 | 1265789 | similar to protein kinase, lysine deficient 1; kinase deficient protein           | RGD1307284 | 306811 | 1,32 | up   |
| 6201552 | 7156052 | 1265786 | similar to protein kinase, lysine deficient 1; kinase deficient protein           | RGD1307284 | 306811 | 1,19 | down |
| 6224612 | 7156052 | 1265789 | similar to protein kinase, lysine deficient 1; kinase deficient protein           | RGD1307284 | 306811 | 1,40 | down |
| 6403584 | 7156052 | 1265778 | similar to protein kinase, lysine deficient 1; kinase deficient protein           | RGD1307284 | 306811 | 1,03 | down |
| 6522485 | 7156052 | 1265780 | similar to protein kinase, lysine deficient 1; kinase deficient protein           | RGD1307284 | 306811 | 1,39 | down |
| 5867108 | 7266706 | 1538743 | similar to RAB11 family interacting protein 5 (class I) isoform 1                 | LOC312502  | 312502 | 1,52 | up   |
| 5894672 | 7266706 | 1538743 | similar to RAB11 family interacting protein 5 (class I) isoform 1                 | LOC312502  | 312502 | 1,54 | up   |
| 5931442 | 7266706 | 1538743 | similar to RAB11 family interacting protein 5 (class I) isoform 1                 | LOC312502  | 312502 | 1,07 | down |
| 6156152 | 7266706 | 1538743 | similar to RAB11 family interacting protein 5 (class I) isoform 1                 | LOC312502  | 312502 | 1,13 | up   |
| 6356713 | 7266706 | 1538743 | similar to RAB11 family interacting protein 5 (class I) isoform 1                 | LOC312502  | 312502 | 1,01 | down |
| 6509429 | 7101258 | 1130556 | similar to Rasa4 protein                                                          | RGD1565457 | 288589 | 2,44 | down |
| 6701308 | 7101258 | 1130582 | similar to Rasa4 protein                                                          | RGD1565457 | 288589 | 1,58 | down |
| 5626737 | 7180630 | 1326431 | similar to RGD, leucine-rich repeat, tropomodulin and proline-rich containing pro | RGD1562390 | 307797 | 1,24 | up   |
| 5644010 | 7180630 | 1326427 | similar to RGD, leucine-rich repeat, tropomodulin and proline-rich containing pro | RGD1562390 | 307797 | 1,06 | up   |
| 5685471 | 7180630 | 1326441 | similar to RGD, leucine-rich repeat, tropomodulin and proline-rich containing pro | RGD1562390 | 307797 | 1,54 | down |
| 5705443 | 7180630 | 1326434 | similar to RGD, leucine-rich repeat, tropomodulin and proline-rich containing pro | RGD1562390 | 307797 | 1,14 | up   |
| 5723789 | 7180630 | 1326455 | similar to RGD, leucine-rich repeat, tropomodulin and proline-rich containing pro | RGD1562390 | 307797 | 2,22 | down |
| 5750844 | 7180630 | 1326431 | similar to RGD, leucine-rich repeat, tropomodulin and proline-rich containing pro | RGD1562390 | 307797 | 1,08 | up   |
| 5761056 | 7180630 | 1326442 | similar to RGD, leucine-rich repeat, tropomodulin and proline-rich containing pro | RGD1562390 | 307797 | 1,22 | up   |
| 5795359 | 7180630 | 1326455 | similar to RGD, leucine-rich repeat, tropomodulin and proline-rich containing pro | RGD1562390 | 307797 | 1,96 | down |
| 5796490 | 7180630 | 1326440 | similar to RGD, leucine-rich repeat, tropomodulin and proline-rich containing pro | RGD1562390 | 307797 | 1,03 | down |
| 5914236 | 7180630 | 1326430 | similar to RGD, leucine-rich repeat, tropomodulin and proline-rich containing pro | RGD1562390 | 307797 | 1,39 | up   |
| 5916472 | 7180630 | 1326450 | similar to RGD, leucine-rich repeat, tropomodulin and proline-rich containing pro | RGD1562390 | 307797 | 1,09 | up   |
| 5918663 | 7180630 | 1326435 | similar to RGD, leucine-rich repeat, tropomodulin and proline-rich containing pro | RGD1562390 | 307797 | 1,64 | up   |
| 5943602 | 7180630 | 1326435 | similar to RGD, leucine-rich repeat, tropomodulin and proline-rich containing pro | RGD1562390 | 307797 | 1,36 | down |
| 5953673 | 7180630 | 1326436 | similar to RGD, leucine-rich repeat, tropomodulin and proline-rich containing pro | RGD1562390 | 307797 | 1,23 | up   |
| 6051933 | 7180630 | 1326433 | similar to RGD, leucine-rich repeat, tropomodulin and proline-rich containing pro | RGD1562390 | 307797 | 1,12 | down |
| 6073590 | 7180630 | 1326443 | similar to RGD, leucine-rich repeat, tropomodulin and proline-rich containing pro | RGD1562390 | 307797 | 1,20 | up   |
| 6099750 | 7180630 | 1326435 | similar to RGD, leucine-rich repeat, tropomodulin and proline-rich containing pro | RGD1562390 | 307797 | 1,03 | down |
| 6122065 | 7180630 | 1326448 | similar to RGD, leucine-rich repeat, tropomodulin and proline-rich containing pro | RGD1562390 | 307797 | 1,38 | down |
| 6135924 | 7180630 | 1326426 | similar to RGD, leucine-rich repeat, tropomodulin and proline-rich containing pro | RGD1562390 | 307797 | 1,33 | down |
| 6139841 | 7180630 | 1326433 | similar to RGD, leucine-rich repeat, tropomodulin and proline-rich containing pro | RGD1562390 | 307797 | 1,26 | up   |
| 6209475 | 7180630 | 1326453 | similar to RGD, leucine-rich repeat, tropomodulin and proline-rich containing pro | RGD1562390 | 307797 | 1,16 | down |
| 6226854 | 7180630 | 1326454 | similar to RGD, leucine-rich repeat, tropomodulin and proline-rich containing pro | RGD1562390 | 307797 | 2,49 | down |
| 6269879 | 7180630 | 1326444 | similar to RGD, leucine-rich repeat, tropomodulin and proline-rich containing pro | RGD1562390 | 307797 | 1,40 | up   |
| 6293773 | 7180630 | 1326437 | similar to RGD, leucine-rich repeat, tropomodulin and proline-rich containing pro | RGD1562390 | 307797 | 1,44 | down |
| 6326125 | 7180630 | 1326439 | similar to RGD, leucine-rich repeat, tropomodulin and proline-rich containing pro | RGD1562390 | 307797 | 1,22 | down |
| 6330775 | 7180630 | 1326425 | similar to RGD, leucine-rich repeat, tropomodulin and proline-rich containing pro | RGD1562390 | 307797 | 1,24 | up   |
| 6377532 | 7180630 | 1326451 | similar to RGD, leucine-rich repeat, tropomodulin and proline-rich containing pro | RGD1562390 | 307797 | 1,33 | down |
| 6393403 | 7180630 | 1326447 | similar to RGD, leucine-rich repeat, tropomodulin and proline-rich containing pro | RGD1562390 | 307797 | 1,25 | down |
| 6400915 | 7180630 | 1326426 | similar to RGD, leucine-rich repeat, tropomodulin and proline-rich containing pro | RGD1562390 | 307797 | 1,76 | down |
| 6409308 | 7180630 | 1326429 | similar to RGD, leucine-rich repeat, tropomodulin and proline-rich containing pro | RGD1562390 | 307797 | 1,13 | up   |

|         |         |         |                                                                                   |            |        |      |      |
|---------|---------|---------|-----------------------------------------------------------------------------------|------------|--------|------|------|
| 6445588 | 7180630 | 1326449 | similar to RGD, leucine-rich repeat, tropomodulin and proline-rich containing pro | RGD1562390 | 307797 | 1,10 | down |
| 6447836 | 7180630 | 1326455 | similar to RGD, leucine-rich repeat, tropomodulin and proline-rich containing pro | RGD1562390 | 307797 | 1,13 | down |
| 6449890 | 7180630 | 1326455 | similar to RGD, leucine-rich repeat, tropomodulin and proline-rich containing pro | RGD1562390 | 307797 | 1,82 | down |
| 6491530 | 7180630 | 1326432 | similar to RGD, leucine-rich repeat, tropomodulin and proline-rich containing pro | RGD1562390 | 307797 | 1,47 | up   |
| 6539076 | 7180630 | 1326446 | similar to RGD, leucine-rich repeat, tropomodulin and proline-rich containing pro | RGD1562390 | 307797 | 1,01 | up   |
| 6563803 | 7180630 | 1326456 | similar to RGD, leucine-rich repeat, tropomodulin and proline-rich containing pro | RGD1562390 | 307797 | 1,09 | up   |
| 6598972 | 7180630 | 1326438 | similar to RGD, leucine-rich repeat, tropomodulin and proline-rich containing pro | RGD1562390 | 307797 | 1,15 | down |
| 6619048 | 7180630 | 1326445 | similar to RGD, leucine-rich repeat, tropomodulin and proline-rich containing pro | RGD1562390 | 307797 | 1,27 | up   |
| 6638409 | 7180630 | 1326456 | similar to RGD, leucine-rich repeat, tropomodulin and proline-rich containing pro | RGD1562390 | 307797 | 1,60 | up   |
| 6667117 | 7180630 | 1326452 | similar to RGD, leucine-rich repeat, tropomodulin and proline-rich containing pro | RGD1562390 | 307797 | 1,17 | up   |
| 6703699 | 7180630 | 1326428 | similar to RGD, leucine-rich repeat, tropomodulin and proline-rich containing pro | RGD1562390 | 307797 | 1,04 | up   |
| 6709846 | 7373633 | 1805710 | similar to ribosomal protein L31                                                  | LOC679519  | 679519 | 2,11 | down |
| 5636855 | 7112268 | 1157754 | similar to RIKEN cDNA 1200016B10                                                  | RGD1308695 | 289088 | 1,73 | down |
| 5713414 | 7112268 | 1157765 | similar to RIKEN cDNA 1200016B10                                                  | RGD1308695 | 289088 | 1,24 | up   |
| 5735823 | 7112268 | 1157752 | similar to RIKEN cDNA 1200016B10                                                  | RGD1308695 | 289088 | 1,30 | up   |
| 5747642 | 7112268 | 1157751 | similar to RIKEN cDNA 1200016B10                                                  | RGD1308695 | 289088 | 1,06 | down |
| 5844158 | 7112268 | 1157758 | similar to RIKEN cDNA 1200016B10                                                  | RGD1308695 | 289088 | 1,02 | up   |
| 5855041 | 7112268 | 1157746 | similar to RIKEN cDNA 1200016B10                                                  | RGD1308695 | 289088 | 1,07 | up   |
| 5886323 | 7112268 | 1157756 | similar to RIKEN cDNA 1200016B10                                                  | RGD1308695 | 289088 | 1,58 | down |
| 6037860 | 7112268 | 1157761 | similar to RIKEN cDNA 1200016B10                                                  | RGD1308695 | 289088 | 1,51 | down |
| 6082272 | 7112268 | 1157759 | similar to RIKEN cDNA 1200016B10                                                  | RGD1308695 | 289088 | 1,03 | down |
| 6116289 | 7112268 | 1157745 | similar to RIKEN cDNA 1200016B10                                                  | RGD1308695 | 289088 | 1,18 | down |
| 6225006 | 7112268 | 1157766 | similar to RIKEN cDNA 1200016B10                                                  | RGD1308695 | 289088 | 1,21 | up   |
| 6244021 | 7112268 | 1157762 | similar to RIKEN cDNA 1200016B10                                                  | RGD1308695 | 289088 | 1,11 | down |
| 6259289 | 7112268 | 1157760 | similar to RIKEN cDNA 1200016B10                                                  | RGD1308695 | 289088 | 1,25 | up   |
| 6285146 | 7112268 | 1157758 | similar to RIKEN cDNA 1200016B10                                                  | RGD1308695 | 289088 | 1,72 | down |
| 6304623 | 7112268 | 1157761 | similar to RIKEN cDNA 1200016B10                                                  | RGD1308695 | 289088 | 1,03 | down |
| 6411611 | 7112268 | 1157757 | similar to RIKEN cDNA 1200016B10                                                  | RGD1308695 | 289088 | 1,18 | up   |
| 6457912 | 7112268 | 1157766 | similar to RIKEN cDNA 1200016B10                                                  | RGD1308695 | 289088 | 1,52 | up   |
| 6479959 | 7112268 | 1157764 | similar to RIKEN cDNA 1200016B10                                                  | RGD1308695 | 289088 | 2,17 | down |
| 6530725 | 7112268 | 1157750 | similar to RIKEN cDNA 1200016B10                                                  | RGD1308695 | 289088 | 1,18 | up   |
| 6616043 | 7112268 | 1157746 | similar to RIKEN cDNA 1200016B10                                                  | RGD1308695 | 289088 | 1,03 | down |
| 6665159 | 7112268 | 1157755 | similar to RIKEN cDNA 1200016B10                                                  | RGD1308695 | 289088 | 1,12 | up   |
| 6666274 | 7112268 | 1157753 | similar to RIKEN cDNA 1200016B10                                                  | RGD1308695 | 289088 | 1,11 | down |
| 6722594 | 7112268 | 1157747 | similar to RIKEN cDNA 1200016B10                                                  | RGD1308695 | 289088 | 1,12 | up   |
| 6735304 | 7112268 | 1157748 | similar to RIKEN cDNA 1200016B10                                                  | RGD1308695 | 289088 | 1,13 | up   |
| 5701550 | 7075096 | 1068586 | similar to RIKEN cDNA 1520401A03 gene                                             | RGD1307032 | 360486 | 1,04 | up   |
| 5737963 | 7075096 | 1068587 | similar to RIKEN cDNA 1520401A03 gene                                             | RGD1307032 | 360486 | 1,06 | up   |
| 5739534 | 7075096 | 1068596 | similar to RIKEN cDNA 1520401A03 gene                                             | RGD1307032 | 360486 | 1,18 | up   |
| 5747041 | 7075096 | 1068574 | similar to RIKEN cDNA 1520401A03 gene                                             | RGD1307032 | 360486 | 1,07 | up   |
| 5756200 | 7075096 | 1068595 | similar to RIKEN cDNA 1520401A03 gene                                             | RGD1307032 | 360486 | 1,67 | down |
| 5826932 | 7075096 | 1068568 | similar to RIKEN cDNA 1520401A03 gene                                             | RGD1307032 | 360486 | 1,73 | up   |
| 5999886 | 7075096 | 1068566 | similar to RIKEN cDNA 1520401A03 gene                                             | RGD1307032 | 360486 | 1,09 | down |
| 6004508 | 7075096 | 1068602 | similar to RIKEN cDNA 1520401A03 gene                                             | RGD1307032 | 360486 | 1,18 | up   |
| 6014915 | 7075096 | 1068573 | similar to RIKEN cDNA 1520401A03 gene                                             | RGD1307032 | 360486 | 1,40 | up   |
| 6033864 | 7075096 | 1068592 | similar to RIKEN cDNA 1520401A03 gene                                             | RGD1307032 | 360486 | 1,64 | down |
| 6036634 | 7075096 | 1068586 | similar to RIKEN cDNA 1520401A03 gene                                             | RGD1307032 | 360486 | 1,69 | up   |
| 6038759 | 7075096 | 1068569 | similar to RIKEN cDNA 1520401A03 gene                                             | RGD1307032 | 360486 | 1,06 | up   |
| 6057928 | 7075096 | 1068600 | similar to RIKEN cDNA 1520401A03 gene                                             | RGD1307032 | 360486 | 1,54 | up   |
| 6077446 | 7075096 | 1068571 | similar to RIKEN cDNA 1520401A03 gene                                             | RGD1307032 | 360486 | 1,23 | down |
| 6147863 | 7075096 | 1068589 | similar to RIKEN cDNA 1520401A03 gene                                             | RGD1307032 | 360486 | 1,65 | down |
| 6151884 | 7075096 | 1068579 | similar to RIKEN cDNA 1520401A03 gene                                             | RGD1307032 | 360486 | 1,43 | up   |
| 6163401 | 7075096 | 1068597 | similar to RIKEN cDNA 1520401A03 gene                                             | RGD1307032 | 360486 | 1,13 | down |
| 6185972 | 7075096 | 1068594 | similar to RIKEN cDNA 1520401A03 gene                                             | RGD1307032 | 360486 | 1,10 | down |
| 6316486 | 7075096 | 1068599 | similar to RIKEN cDNA 1520401A03 gene                                             | RGD1307032 | 360486 | 1,47 | down |
| 6353680 | 7075096 | 1068587 | similar to RIKEN cDNA 1520401A03 gene                                             | RGD1307032 | 360486 | 1,01 | down |

|         |         |         |                                                                                                                           |            |        |      |      |
|---------|---------|---------|---------------------------------------------------------------------------------------------------------------------------|------------|--------|------|------|
| 6384273 | 7075096 | 1068583 | similar to RIKEN cDNA 1520401A03 gene                                                                                     | RGD1307032 | 360486 | 1,30 | down |
| 6472183 | 7075096 | 1068580 | similar to RIKEN cDNA 1520401A03 gene                                                                                     | RGD1307032 | 360486 | 2,21 | up   |
| 6533854 | 7075096 | 1068588 | similar to RIKEN cDNA 1520401A03 gene                                                                                     | RGD1307032 | 360486 | 1,34 | down |
| 6559062 | 7075096 | 1068577 | similar to RIKEN cDNA 1520401A03 gene                                                                                     | RGD1307032 | 360486 | 1,08 | down |
| 6565879 | 7075096 | 1068596 | similar to RIKEN cDNA 1520401A03 gene                                                                                     | RGD1307032 | 360486 | 1,39 | down |
| 6572981 | 7075096 | 1068591 | similar to RIKEN cDNA 1520401A03 gene                                                                                     | RGD1307032 | 360486 | 1,47 | down |
| 6588826 | 7075096 | 1068572 | similar to RIKEN cDNA 1520401A03 gene                                                                                     | RGD1307032 | 360486 | 1,06 | up   |
| 6631084 | 7075096 | 1068601 | similar to RIKEN cDNA 1520401A03 gene                                                                                     | RGD1307032 | 360486 | 1,02 | up   |
| 6637500 | 7075096 | 1068570 | similar to RIKEN cDNA 1520401A03 gene                                                                                     | RGD1307032 | 360486 | 1,02 | up   |
| 6648111 | 7075096 | 1068603 | similar to RIKEN cDNA 1520401A03 gene                                                                                     | RGD1307032 | 360486 | 1,23 | down |
| 6718897 | 7075096 | 1068567 | similar to RIKEN cDNA 1520401A03 gene                                                                                     | RGD1307032 | 360486 | 1,01 | down |
| 5712691 | 7369043 | 1793106 | similar to RIKEN cDNA 1700001E04                                                                                          | MGC116197  | 367620 | 1,25 | up   |
| 5862199 | 7369043 | 1793105 | similar to RIKEN cDNA 1700001E04                                                                                          | MGC116197  | 367620 | 1,00 | down |
| 5923578 | 7368565 | 1791291 | similar to RIKEN cDNA 1700001E04                                                                                          | LOC363181  | 363181 | 1,18 | down |
| 6371714 | 7369938 | 1795526 | similar to RIKEN cDNA 1700001E04                                                                                          | LOC363181  | 363181 | 1,46 | up   |
| 6405561 | 7368565 | 1791289 | similar to RIKEN cDNA 1700001E04                                                                                          | LOC363181  | 363181 | 1,42 | up   |
| 6598992 | 7369043 | 1793108 | similar to RIKEN cDNA 1700001E04                                                                                          | MGC116197  | 367620 | 3,08 | down |
| 6630820 | 7368565 | 1791291 | similar to RIKEN cDNA 1700001E04                                                                                          | LOC363181  | 363181 | 1,34 | down |
| 6647964 | 7369043 | 1793102 | similar to RIKEN cDNA 1700001E04                                                                                          | MGC116197  | 367620 | 1,12 | up   |
| 6111705 | 7371539 | 1800299 | similar to RIKEN cDNA 1700001F09                                                                                          | LOC290508  | 290508 | 1,01 | down |
| 6316524 | 7371539 | 1800299 | similar to RIKEN cDNA 1700001F09                                                                                          | LOC290508  | 290508 | 1,26 | up   |
| 6541063 | 7371539 | 1800299 | similar to RIKEN cDNA 1700001F09                                                                                          | LOC290508  | 290508 | 1,00 | up   |
| 5707572 | 7266778 | 1538857 | similar to RIKEN cDNA 1700019G17                                                                                          | RGD1563507 | 500238 | 1,14 | down |
| 6008331 | 7266778 | 1538856 | similar to RIKEN cDNA 1700019G17                                                                                          | RGD1563507 | 500238 | 1,62 | down |
| 6338004 | 7266778 | 1538855 | similar to RIKEN cDNA 1700019G17                                                                                          | RGD1563507 | 500238 | 1,07 | up   |
| 6386253 | 7266778 | 1538854 | similar to RIKEN cDNA 1700019G17 /// camello-like 2 /// similar to Camello-like3507 /// Cml2 /// LO238 /// 500237 /// 681 |            |        | 1,30 | down |
| 6529644 | 7096898 | 1119518 | similar to RIKEN cDNA 1810042K04                                                                                          | RGD1305593 | 288513 | 1,77 | up   |
| 5620523 | 7284501 | 1583872 | similar to RIKEN cDNA 1810074P20                                                                                          | RGD1309308 | 313115 | 1,12 | down |
| 5653585 | 7284501 | 1583851 | similar to RIKEN cDNA 1810074P20                                                                                          | RGD1309308 | 313115 | 1,01 | up   |
| 5794488 | 7284501 | 1583854 | similar to RIKEN cDNA 1810074P20                                                                                          | RGD1309308 | 313115 | 1,23 | down |
| 5823550 | 7284501 | 1583868 | similar to RIKEN cDNA 1810074P20                                                                                          | RGD1309308 | 313115 | 1,06 | up   |
| 5898197 | 7284501 | 1583860 | similar to RIKEN cDNA 1810074P20                                                                                          | RGD1309308 | 313115 | 1,02 | up   |
| 5912951 | 7284501 | 1583874 | similar to RIKEN cDNA 1810074P20                                                                                          | RGD1309308 | 313115 | 1,07 | up   |
| 5916230 | 7284501 | 1583863 | similar to RIKEN cDNA 1810074P20                                                                                          | RGD1309308 | 313115 | 1,02 | down |
| 5949442 | 7284501 | 1583850 | similar to RIKEN cDNA 1810074P20                                                                                          | RGD1309308 | 313115 | 1,11 | up   |
| 5963775 | 7284501 | 1583858 | similar to RIKEN cDNA 1810074P20                                                                                          | RGD1309308 | 313115 | 1,08 | down |
| 6014993 | 7284501 | 1583853 | similar to RIKEN cDNA 1810074P20                                                                                          | RGD1309308 | 313115 | 1,28 | down |
| 6143088 | 7284501 | 1583871 | similar to RIKEN cDNA 1810074P20                                                                                          | RGD1309308 | 313115 | 1,09 | down |
| 6195314 | 7284501 | 1583865 | similar to RIKEN cDNA 1810074P20                                                                                          | RGD1309308 | 313115 | 1,32 | up   |
| 6243960 | 7284501 | 1583855 | similar to RIKEN cDNA 1810074P20                                                                                          | RGD1309308 | 313115 | 2,83 | down |
| 6406712 | 7284501 | 1583857 | similar to RIKEN cDNA 1810074P20                                                                                          | RGD1309308 | 313115 | 1,09 | down |
| 6525926 | 7284501 | 1583852 | similar to RIKEN cDNA 1810074P20                                                                                          | RGD1309308 | 313115 | 1,15 | down |
| 6538809 | 7284501 | 1583859 | similar to RIKEN cDNA 1810074P20                                                                                          | RGD1309308 | 313115 | 1,62 | down |
| 6650974 | 7284501 | 1583869 | similar to RIKEN cDNA 1810074P20                                                                                          | RGD1309308 | 313115 | 1,19 | up   |
| 6680403 | 7284501 | 1583870 | similar to RIKEN cDNA 1810074P20                                                                                          | RGD1309308 | 313115 | 1,10 | down |
| 6694742 | 7284501 | 1583861 | similar to RIKEN cDNA 1810074P20                                                                                          | RGD1309308 | 313115 | 1,00 | down |
| 6728612 | 7284501 | 1583855 | similar to RIKEN cDNA 1810074P20                                                                                          | RGD1309308 | 313115 | 1,19 | down |
| 5705537 | 7119179 | 1175006 | similar to RIKEN cDNA 2310045A20                                                                                          | RGD1562860 | 360945 | 1,47 | up   |
| 5749371 | 7119179 | 1174997 | similar to RIKEN cDNA 2310045A20                                                                                          | RGD1562860 | 360945 | 1,25 | down |
| 5827120 | 7119179 | 1174983 | similar to RIKEN cDNA 2310045A20                                                                                          | RGD1562860 | 360945 | 1,58 | up   |
| 5898724 | 7119179 | 1175007 | similar to RIKEN cDNA 2310045A20                                                                                          | RGD1562860 | 360945 | 1,50 | up   |
| 5904623 | 7119179 | 1174989 | similar to RIKEN cDNA 2310045A20                                                                                          | RGD1562860 | 360945 | 1,20 | up   |
| 5935497 | 7119179 | 1174982 | similar to RIKEN cDNA 2310045A20                                                                                          | RGD1562860 | 360945 | 1,10 | up   |
| 5977534 | 7119179 | 1174991 | similar to RIKEN cDNA 2310045A20                                                                                          | RGD1562860 | 360945 | 1,07 | up   |
| 6001246 | 7119179 | 1174978 | similar to RIKEN cDNA 2310045A20                                                                                          | RGD1562860 | 360945 | 1,05 | up   |
| 6073748 | 7119179 | 1174999 | similar to RIKEN cDNA 2310045A20                                                                                          | RGD1562860 | 360945 | 1,27 | down |



|         |         |         |                                  |            |        |      |      |
|---------|---------|---------|----------------------------------|------------|--------|------|------|
| 6097863 | 7119179 | 1175001 | similar to RIKEN cDNA 2310045A20 | RGD1562860 | 360945 | 1,38 | down |
| 6140999 | 7119179 | 1174966 | similar to RIKEN cDNA 2310045A20 | RGD1562860 | 360945 | 1,61 | up   |
| 6155328 | 7119179 | 1174983 | similar to RIKEN cDNA 2310045A20 | RGD1562860 | 360945 | 1,55 | up   |
| 6185515 | 7119179 | 1175007 | similar to RIKEN cDNA 2310045A20 | RGD1562860 | 360945 | 1,10 | down |
| 6191881 | 7119179 | 1174993 | similar to RIKEN cDNA 2310045A20 | RGD1562860 | 360945 | 1,35 | up   |
| 6242257 | 7119179 | 1174994 | similar to RIKEN cDNA 2310045A20 | RGD1562860 | 360945 | 1,17 | up   |
| 6245726 | 7119179 | 1175003 | similar to RIKEN cDNA 2310045A20 | RGD1562860 | 360945 | 1,00 | up   |
| 6249938 | 7119179 | 1174971 | similar to RIKEN cDNA 2310045A20 | RGD1562860 | 360945 | 1,02 | up   |
| 6296995 | 7119179 | 1174992 | similar to RIKEN cDNA 2310045A20 | RGD1562860 | 360945 | 1,13 | down |
| 6338596 | 7119179 | 1174967 | similar to RIKEN cDNA 2310045A20 | RGD1562860 | 360945 | 1,09 | down |
| 6342559 | 7119179 | 1174977 | similar to RIKEN cDNA 2310045A20 | RGD1562860 | 360945 | 2,04 | down |
| 6363549 | 7119179 | 1174990 | similar to RIKEN cDNA 2310045A20 | RGD1562860 | 360945 | 1,27 | up   |
| 6376379 | 7119179 | 1174976 | similar to RIKEN cDNA 2310045A20 | RGD1562860 | 360945 | 1,44 | down |
| 6410936 | 7119179 | 1175002 | similar to RIKEN cDNA 2310045A20 | RGD1562860 | 360945 | 1,22 | up   |
| 6417582 | 7119179 | 1174971 | similar to RIKEN cDNA 2310045A20 | RGD1562860 | 360945 | 1,13 | down |
| 6476123 | 7119179 | 1175007 | similar to RIKEN cDNA 2310045A20 | RGD1562860 | 360945 | 1,27 | down |
| 6556816 | 7119179 | 1174980 | similar to RIKEN cDNA 2310045A20 | RGD1562860 | 360945 | 1,32 | up   |
| 6558073 | 7119179 | 1174986 | similar to RIKEN cDNA 2310045A20 | RGD1562860 | 360945 | 1,24 | up   |
| 6576777 | 7119179 | 1174998 | similar to RIKEN cDNA 2310045A20 | RGD1562860 | 360945 | 1,19 | down |
| 6628458 | 7119179 | 1175008 | similar to RIKEN cDNA 2310045A20 | RGD1562860 | 360945 | 1,45 | up   |
| 6669513 | 7119179 | 1174987 | similar to RIKEN cDNA 2310045A20 | RGD1562860 | 360945 | 1,10 | down |
| 6695596 | 7119179 | 1174981 | similar to RIKEN cDNA 2310045A20 | RGD1562860 | 360945 | 1,25 | down |
| 5663339 | 7099294 | 1126086 | similar to RIKEN cDNA 2410025L10 | RGD1563342 | 304572 | 1,23 | up   |
| 5673990 | 7099294 | 1126106 | similar to RIKEN cDNA 2410025L10 | RGD1563342 | 304572 | 1,03 | down |
| 5677425 | 7099294 | 1126075 | similar to RIKEN cDNA 2410025L10 | RGD1563342 | 304572 | 1,16 | down |
| 5717204 | 7099294 | 1126108 | similar to RIKEN cDNA 2410025L10 | RGD1563342 | 304572 | 1,05 | up   |
| 5742815 | 7099294 | 1126102 | similar to RIKEN cDNA 2410025L10 | RGD1563342 | 304572 | 1,10 | up   |
| 5764306 | 7099294 | 1126094 | similar to RIKEN cDNA 2410025L10 | RGD1563342 | 304572 | 1,56 | up   |
| 5832763 | 7099294 | 1126104 | similar to RIKEN cDNA 2410025L10 | RGD1563342 | 304572 | 1,17 | up   |
| 5849134 | 7099294 | 1126105 | similar to RIKEN cDNA 2410025L10 | RGD1563342 | 304572 | 1,05 | down |
| 5860520 | 7099294 | 1126096 | similar to RIKEN cDNA 2410025L10 | RGD1563342 | 304572 | 1,10 | up   |
| 5948207 | 7099294 | 1126108 | similar to RIKEN cDNA 2410025L10 | RGD1563342 | 304572 | 1,22 | up   |
| 5975861 | 7099294 | 1126108 | similar to RIKEN cDNA 2410025L10 | RGD1563342 | 304572 | 3,19 | down |
| 5979829 | 7099294 | 1126108 | similar to RIKEN cDNA 2410025L10 | RGD1563342 | 304572 | 1,12 | down |
| 5996378 | 7099294 | 1126103 | similar to RIKEN cDNA 2410025L10 | RGD1563342 | 304572 | 1,02 | down |
| 6004655 | 7099294 | 1126109 | similar to RIKEN cDNA 2410025L10 | RGD1563342 | 304572 | 1,56 | up   |
| 6070925 | 7099294 | 1126108 | similar to RIKEN cDNA 2410025L10 | RGD1563342 | 304572 | 1,15 | down |
| 6098366 | 7099294 | 1126108 | similar to RIKEN cDNA 2410025L10 | RGD1563342 | 304572 | 1,36 | up   |
| 6129277 | 7099294 | 1126098 | similar to RIKEN cDNA 2410025L10 | RGD1563342 | 304572 | 1,02 | down |
| 6190504 | 7099294 | 1126076 | similar to RIKEN cDNA 2410025L10 | RGD1563342 | 304572 | 1,18 | down |
| 6231703 | 7099294 | 1126097 | similar to RIKEN cDNA 2410025L10 | RGD1563342 | 304572 | 1,27 | down |
| 6232531 | 7099294 | 1126099 | similar to RIKEN cDNA 2410025L10 | RGD1563342 | 304572 | 1,09 | up   |
| 6272900 | 7099294 | 1126102 | similar to RIKEN cDNA 2410025L10 | RGD1563342 | 304572 | 1,26 | up   |
| 6297803 | 7099294 | 1126108 | similar to RIKEN cDNA 2410025L10 | RGD1563342 | 304572 | 1,06 | up   |
| 6324215 | 7099294 | 1126108 | similar to RIKEN cDNA 2410025L10 | RGD1563342 | 304572 | 1,20 | up   |
| 6394317 | 7099294 | 1126087 | similar to RIKEN cDNA 2410025L10 | RGD1563342 | 304572 | 1,41 | down |
| 6446680 | 7099294 | 1126098 | similar to RIKEN cDNA 2410025L10 | RGD1563342 | 304572 | 1,04 | down |
| 6450212 | 7099294 | 1126097 | similar to RIKEN cDNA 2410025L10 | RGD1563342 | 304572 | 1,21 | up   |
| 6457074 | 7099294 | 1126079 | similar to RIKEN cDNA 2410025L10 | RGD1563342 | 304572 | 1,06 | down |
| 6484169 | 7099294 | 1126074 | similar to RIKEN cDNA 2410025L10 | RGD1563342 | 304572 | 1,88 | down |
| 6534062 | 7099294 | 1126098 | similar to RIKEN cDNA 2410025L10 | RGD1563342 | 304572 | 1,32 | up   |
| 6559909 | 7099294 | 1126095 | similar to RIKEN cDNA 2410025L10 | RGD1563342 | 304572 | 1,00 | up   |
| 6577197 | 7099294 | 1126107 | similar to RIKEN cDNA 2410025L10 | RGD1563342 | 304572 | 1,12 | down |
| 6587931 | 7099294 | 1126096 | similar to RIKEN cDNA 2410025L10 | RGD1563342 | 304572 | 1,12 | up   |
| 6611219 | 7099294 | 1126096 | similar to RIKEN cDNA 2410025L10 | RGD1563342 | 304572 | 1,09 | up   |
| 6689931 | 7099294 | 1126075 | similar to RIKEN cDNA 2410025L10 | RGD1563342 | 304572 | 1,24 | up   |

|         |         |         |                                                                               |                         |                   |      |      |
|---------|---------|---------|-------------------------------------------------------------------------------|-------------------------|-------------------|------|------|
| 5768413 | 7367262 | 1786898 | similar to RIKEN cDNA 2610042L04                                              | LOC501224               | 501224            | 1,02 | down |
| 5775250 | 7367262 | 1786898 | similar to RIKEN cDNA 2610042L04                                              | LOC501224               | 501224            | 1,19 | down |
| 5850487 | 7367262 | 1786897 | similar to RIKEN cDNA 2610042L04                                              | LOC501224               | 501224            | 2,23 | up   |
| 6161368 | 7369043 | 1793110 | similar to RIKEN cDNA 2610042L04                                              | LOC363408               | 363408            | 1,07 | down |
| 6402816 | 7369043 | 1793110 | similar to RIKEN cDNA 2610042L04 /// similar to Discs large homolog 5 (Placen | LOC363408 /// LOC501    | 363408 /// 501400 | 1,86 | up   |
| 6091718 | 7369939 | 1795591 | similar to RIKEN cDNA 2610042L04 /// similar to RIKEN cDNA 4930555G01         | LOC501224 /// LOC367    | 501224 /// 367381 | 1,02 | down |
| 6495423 | 7369939 | 1795610 | similar to RIKEN cDNA 2610042L04 /// similar to RIKEN cDNA 4930555G01         | LOC501224 /// LOC367    | 501224 /// 367381 | 1,18 | down |
| 6691850 | 7367262 | 1786900 | similar to RIKEN cDNA 2610042L04 /// similar to RIKEN cDNA 4930555G01         | LOC367381 /// LOC367    | 367381 /// 367381 | 2,06 | down |
| 6230612 | 7367262 | 1786894 | similar to RIKEN cDNA 2610042L04 /// similar to similar to RIKEN cDNA 26101   | LOC688772 /// LOC688772 | 688772 /// 69C    | 1,07 | up   |
| 5687105 | 7286124 | 1587300 | similar to RIKEN cDNA 2810432L12                                              | RGD1307218              | 362518            | 1,19 | down |
| 5768397 | 7286124 | 1587302 | similar to RIKEN cDNA 2810432L12                                              | RGD1307218              | 362518            | 2,09 | down |
| 6304045 | 7286124 | 1587301 | similar to RIKEN cDNA 2810432L12                                              | RGD1307218              | 362518            | 1,44 | down |
| 6504372 | 7286124 | 1587300 | similar to RIKEN cDNA 2810432L12                                              | RGD1307218              | 362518            | 1,04 | up   |
| 6519605 | 7286124 | 1587300 | similar to RIKEN cDNA 2810432L12                                              | RGD1307218              | 362518            | 1,94 | up   |
| 6709177 | 7286124 | 1587300 | similar to RIKEN cDNA 2810432L12                                              | RGD1307218              | 362518            | 1,01 | down |
| 6641178 | 7370475 | 1797146 | similar to RIKEN cDNA 2900016D05                                              | RGD1559848              | 317032            | 1,12 | down |
| 5621407 | 7361042 | 1772258 | similar to RIKEN cDNA 4632411B12                                              | RGD1309220              | 316328            | 1,08 | up   |
| 5651867 | 7361042 | 1772275 | similar to RIKEN cDNA 4632411B12                                              | RGD1309220              | 316328            | 1,73 | down |
| 5911633 | 7361042 | 1772268 | similar to RIKEN cDNA 4632411B12                                              | RGD1309220              | 316328            | 1,14 | up   |
| 5955222 | 7361042 | 1772272 | similar to RIKEN cDNA 4632411B12                                              | RGD1309220              | 316328            | 1,01 | up   |
| 5990536 | 7361042 | 1772262 | similar to RIKEN cDNA 4632411B12                                              | RGD1309220              | 316328            | 1,16 | down |
| 5999756 | 7361042 | 1772266 | similar to RIKEN cDNA 4632411B12                                              | RGD1309220              | 316328            | 1,13 | up   |
| 6040687 | 7361042 | 1772270 | similar to RIKEN cDNA 4632411B12                                              | RGD1309220              | 316328            | 1,11 | up   |
| 6100290 | 7361042 | 1772277 | similar to RIKEN cDNA 4632411B12                                              | RGD1309220              | 316328            | 1,38 | up   |
| 6110725 | 7361042 | 1772259 | similar to RIKEN cDNA 4632411B12                                              | RGD1309220              | 316328            | 1,05 | down |
| 6304711 | 7361042 | 1772267 | similar to RIKEN cDNA 4632411B12                                              | RGD1309220              | 316328            | 1,13 | down |
| 6372721 | 7361042 | 1772270 | similar to RIKEN cDNA 4632411B12                                              | RGD1309220              | 316328            | 1,05 | down |
| 6398631 | 7361042 | 1772265 | similar to RIKEN cDNA 4632411B12                                              | RGD1309220              | 316328            | 1,22 | down |
| 6415315 | 7361042 | 1772261 | similar to RIKEN cDNA 4632411B12                                              | RGD1309220              | 316328            | 1,96 | down |
| 6493668 | 7361042 | 1772278 | similar to RIKEN cDNA 4632411B12                                              | RGD1309220              | 316328            | 1,05 | up   |
| 6542367 | 7361042 | 1772257 | similar to RIKEN cDNA 4632411B12                                              | RGD1309220              | 316328            | 1,28 | down |
| 6557501 | 7361042 | 1772257 | similar to RIKEN cDNA 4632411B12                                              | RGD1309220              | 316328            | 1,11 | up   |
| 6568846 | 7361042 | 1772269 | similar to RIKEN cDNA 4632411B12                                              | RGD1309220              | 316328            | 1,24 | up   |
| 6569357 | 7361042 | 1772260 | similar to RIKEN cDNA 4632411B12                                              | RGD1309220              | 316328            | 1,32 | up   |
| 6692344 | 7361042 | 1772274 | similar to RIKEN cDNA 4632411B12                                              | RGD1309220              | 316328            | 1,20 | up   |
| 6705409 | 7361042 | 1772256 | similar to RIKEN cDNA 4632411B12                                              | RGD1309220              | 316328            | 1,06 | up   |
| 6729114 | 7361042 | 1772271 | similar to RIKEN cDNA 4632411B12                                              | RGD1309220              | 316328            | 1,31 | up   |
| 5700476 | 7310158 | 1647842 | similar to RIKEN cDNA 4831426I19                                              | RGD1304563              | 299356            | 1,04 | down |
| 5821708 | 7310158 | 1647826 | similar to RIKEN cDNA 4831426I19                                              | RGD1304563              | 299356            | 1,32 | up   |
| 5866980 | 7310158 | 1647834 | similar to RIKEN cDNA 4831426I19                                              | RGD1304563              | 299356            | 1,15 | up   |
| 5950937 | 7310158 | 1647832 | similar to RIKEN cDNA 4831426I19                                              | RGD1304563              | 299356            | 1,40 | down |
| 5995729 | 7310158 | 1647832 | similar to RIKEN cDNA 4831426I19                                              | RGD1304563              | 299356            | 1,45 | down |
| 6047269 | 7310158 | 1647824 | similar to RIKEN cDNA 4831426I19                                              | RGD1304563              | 299356            | 1,99 | down |
| 6093191 | 7310158 | 1647830 | similar to RIKEN cDNA 4831426I19                                              | RGD1304563              | 299356            | 1,29 | down |
| 6124677 | 7310158 | 1647840 | similar to RIKEN cDNA 4831426I19                                              | RGD1304563              | 299356            | 1,10 | up   |
| 6294992 | 7310158 | 1647828 | similar to RIKEN cDNA 4831426I19                                              | RGD1304563              | 299356            | 1,22 | down |
| 6331763 | 7310158 | 1647822 | similar to RIKEN cDNA 4831426I19                                              | RGD1304563              | 299356            | 2,11 | up   |
| 6345217 | 7310158 | 1647835 | similar to RIKEN cDNA 4831426I19                                              | RGD1304563              | 299356            | 1,49 | down |
| 6365434 | 7310158 | 1647823 | similar to RIKEN cDNA 4831426I19                                              | RGD1304563              | 299356            | 1,06 | down |
| 6392988 | 7310158 | 1647843 | similar to RIKEN cDNA 4831426I19                                              | RGD1304563              | 299356            | 1,02 | up   |
| 6394934 | 7310158 | 1647841 | similar to RIKEN cDNA 4831426I19                                              | RGD1304563              | 299356            | 1,01 | up   |
| 6420091 | 7310158 | 1647839 | similar to RIKEN cDNA 4831426I19                                              | RGD1304563              | 299356            | 1,00 | down |
| 6463514 | 7310158 | 1647838 | similar to RIKEN cDNA 4831426I19                                              | RGD1304563              | 299356            | 1,01 | down |
| 6609024 | 7310158 | 1647836 | similar to RIKEN cDNA 4831426I19                                              | RGD1304563              | 299356            | 1,07 | down |
| 6629832 | 7310158 | 1647846 | similar to RIKEN cDNA 4831426I19                                              | RGD1304563              | 299356            | 1,02 | up   |
| 6672558 | 7310158 | 1647831 | similar to RIKEN cDNA 4831426I19                                              | RGD1304563              | 299356            | 1,20 | down |

|         |         |         |                                       |            |        |      |      |
|---------|---------|---------|---------------------------------------|------------|--------|------|------|
| 6257132 | 7370128 | 1796168 | similar to RIKEN cDNA 4930555G01      | LOC367381  | 367381 | 1,98 | up   |
| 6555536 | 7369939 | 1795607 | similar to RIKEN cDNA 4930555G01      | LOC367381  | 367381 | 1,47 | up   |
| 5735791 | 7245066 | 1485572 | similar to RIKEN cDNA 4931426K16 gene | RGD1311267 | 311429 | 1,01 | down |
| 5751349 | 7245066 | 1485573 | similar to RIKEN cDNA 4931426K16 gene | RGD1311267 | 311429 | 1,12 | down |
| 5896693 | 7245066 | 1485572 | similar to RIKEN cDNA 4931426K16 gene | RGD1311267 | 311429 | 1,20 | up   |
| 5975667 | 7245066 | 1485573 | similar to RIKEN cDNA 4931426K16 gene | RGD1311267 | 311429 | 2,34 | down |
| 5992769 | 7245066 | 1485573 | similar to RIKEN cDNA 4931426K16 gene | RGD1311267 | 311429 | 1,05 | down |
| 6076875 | 7245066 | 1485573 | similar to RIKEN cDNA 4931426K16 gene | RGD1311267 | 311429 | 1,67 | down |
| 6087018 | 7245066 | 1485577 | similar to RIKEN cDNA 4931426K16 gene | RGD1311267 | 311429 | 1,11 | up   |
| 6094878 | 7245066 | 1485576 | similar to RIKEN cDNA 4931426K16 gene | RGD1311267 | 311429 | 1,53 | up   |
| 6136473 | 7245066 | 1485572 | similar to RIKEN cDNA 4931426K16 gene | RGD1311267 | 311429 | 1,96 | up   |
| 6156189 | 7245066 | 1485574 | similar to RIKEN cDNA 4931426K16 gene | RGD1311267 | 311429 | 1,15 | down |
| 6275711 | 7245066 | 1485573 | similar to RIKEN cDNA 4931426K16 gene | RGD1311267 | 311429 | 1,81 | down |
| 6698432 | 7245066 | 1485573 | similar to RIKEN cDNA 4931426K16 gene | RGD1311267 | 311429 | 1,25 | up   |
| 6700615 | 7245066 | 1485575 | similar to RIKEN cDNA 4931426K16 gene | RGD1311267 | 311429 | 1,44 | down |
| 5645009 | 7121866 | 1181865 | similar to RIKEN cDNA 4933435A13      | RGD1306402 | 305583 | 1,15 | up   |
| 5856931 | 7121866 | 1181860 | similar to RIKEN cDNA 4933435A13      | RGD1306402 | 305583 | 1,68 | down |
| 6041471 | 7121866 | 1181866 | similar to RIKEN cDNA 4933435A13      | RGD1306402 | 305583 | 1,21 | down |
| 6133540 | 7121866 | 1181869 | similar to RIKEN cDNA 4933435A13      | RGD1306402 | 305583 | 1,27 | up   |
| 6184447 | 7121866 | 1181856 | similar to RIKEN cDNA 4933435A13      | RGD1306402 | 305583 | 1,26 | down |
| 6265284 | 7121866 | 1181860 | similar to RIKEN cDNA 4933435A13      | RGD1306402 | 305583 | 1,18 | up   |
| 6406557 | 7121866 | 1181870 | similar to RIKEN cDNA 4933435A13      | RGD1306402 | 305583 | 1,07 | down |
| 6430637 | 7121866 | 1181868 | similar to RIKEN cDNA 4933435A13      | RGD1306402 | 305583 | 1,16 | down |
| 6436148 | 7121866 | 1181859 | similar to RIKEN cDNA 4933435A13      | RGD1306402 | 305583 | 1,13 | down |
| 6655165 | 7121866 | 1181859 | similar to RIKEN cDNA 4933435A13      | RGD1306402 | 305583 | 1,12 | up   |
| 6065355 | 7072504 | 1062034 | similar to RIKEN cDNA 4933439F11      | RGD1307851 | 287741 | 1,04 | up   |
| 6628424 | 7072504 | 1062034 | similar to RIKEN cDNA 4933439F11      | RGD1307851 | 287741 | 2,42 | down |
| 5659589 | 7061703 | 1035727 | similar to RIKEN cDNA 5033414D02      | RGD1306839 | 293888 | 1,04 | up   |
| 5911386 | 7061703 | 1035738 | similar to RIKEN cDNA 5033414D02      | RGD1306839 | 293888 | 1,16 | up   |
| 5967889 | 7061703 | 1035739 | similar to RIKEN cDNA 5033414D02      | RGD1306839 | 293888 | 1,08 | down |
| 6038835 | 7061703 | 1035728 | similar to RIKEN cDNA 5033414D02      | RGD1306839 | 293888 | 1,29 | up   |
| 6126018 | 7061703 | 1035734 | similar to RIKEN cDNA 5033414D02      | RGD1306839 | 293888 | 1,24 | up   |
| 6597929 | 7061703 | 1035729 | similar to RIKEN cDNA 5033414D02      | RGD1306839 | 293888 | 2,19 | up   |
| 6637726 | 7061703 | 1035726 | similar to RIKEN cDNA 5033414D02      | RGD1306839 | 293888 | 1,15 | up   |
| 5627955 | 7126658 | 1193131 | similar to RIKEN cDNA 5730509K17 gene | RGD1561042 | 498386 | 1,17 | up   |
| 5629960 | 7126658 | 1193139 | similar to RIKEN cDNA 5730509K17 gene | RGD1561042 | 498386 | 2,11 | down |
| 5633903 | 7126658 | 1193143 | similar to RIKEN cDNA 5730509K17 gene | RGD1561042 | 498386 | 1,75 | down |
| 5658090 | 7126658 | 1193131 | similar to RIKEN cDNA 5730509K17 gene | RGD1561042 | 498386 | 1,48 | up   |
| 5670032 | 7126658 | 1193169 | similar to RIKEN cDNA 5730509K17 gene | RGD1561042 | 498386 | 1,57 | up   |
| 5676236 | 7126658 | 1193167 | similar to RIKEN cDNA 5730509K17 gene | RGD1561042 | 498386 | 1,84 | up   |
| 5736046 | 7126658 | 1193153 | similar to RIKEN cDNA 5730509K17 gene | RGD1561042 | 498386 | 2,60 | up   |
| 5795928 | 7126658 | 1193173 | similar to RIKEN cDNA 5730509K17 gene | RGD1561042 | 498386 | 1,07 | down |
| 5816635 | 7126658 | 1193159 | similar to RIKEN cDNA 5730509K17 gene | RGD1561042 | 498386 | 1,06 | down |
| 5840337 | 7126658 | 1193144 | similar to RIKEN cDNA 5730509K17 gene | RGD1561042 | 498386 | 1,05 | down |
| 5849130 | 7126658 | 1193136 | similar to RIKEN cDNA 5730509K17 gene | RGD1561042 | 498386 | 1,66 | up   |
| 5878234 | 7126658 | 1193152 | similar to RIKEN cDNA 5730509K17 gene | RGD1561042 | 498386 | 1,29 | down |
| 5939670 | 7126658 | 1193160 | similar to RIKEN cDNA 5730509K17 gene | RGD1561042 | 498386 | 1,47 | up   |
| 5948318 | 7126658 | 1193145 | similar to RIKEN cDNA 5730509K17 gene | RGD1561042 | 498386 | 1,06 | up   |
| 5971390 | 7126658 | 1193168 | similar to RIKEN cDNA 5730509K17 gene | RGD1561042 | 498386 | 1,02 | up   |
| 6005970 | 7126658 | 1193163 | similar to RIKEN cDNA 5730509K17 gene | RGD1561042 | 498386 | 1,05 | down |
| 6064099 | 7126658 | 1193138 | similar to RIKEN cDNA 5730509K17 gene | RGD1561042 | 498386 | 1,33 | down |
| 6099120 | 7126658 | 1193132 | similar to RIKEN cDNA 5730509K17 gene | RGD1561042 | 498386 | 1,31 | up   |
| 6192989 | 7126658 | 1193146 | similar to RIKEN cDNA 5730509K17 gene | RGD1561042 | 498386 | 1,42 | down |
| 6233631 | 7126658 | 1193162 | similar to RIKEN cDNA 5730509K17 gene | RGD1561042 | 498386 | 1,37 | down |
| 6252883 | 7126658 | 1193136 | similar to RIKEN cDNA 5730509K17 gene | RGD1561042 | 498386 | 1,43 | up   |
| 6262225 | 7126658 | 1193171 | similar to RIKEN cDNA 5730509K17 gene | RGD1561042 | 498386 | 1,49 | down |

|         |         |         |                                       |            |        |      |      |
|---------|---------|---------|---------------------------------------|------------|--------|------|------|
| 6271152 | 7126658 | 1193155 | similar to RIKEN cDNA 5730509K17 gene | RGD1561042 | 498386 | 1,75 | down |
| 6314201 | 7126658 | 1193130 | similar to RIKEN cDNA 5730509K17 gene | RGD1561042 | 498386 | 1,24 | down |
| 6415116 | 7126658 | 1193140 | similar to RIKEN cDNA 5730509K17 gene | RGD1561042 | 498386 | 1,29 | up   |
| 6443135 | 7126658 | 1193166 | similar to RIKEN cDNA 5730509K17 gene | RGD1561042 | 498386 | 1,56 | up   |
| 6500100 | 7126658 | 1193142 | similar to RIKEN cDNA 5730509K17 gene | RGD1561042 | 498386 | 1,03 | down |
| 6508109 | 7126658 | 1193158 | similar to RIKEN cDNA 5730509K17 gene | RGD1561042 | 498386 | 1,06 | down |
| 6510787 | 7126658 | 1193172 | similar to RIKEN cDNA 5730509K17 gene | RGD1561042 | 498386 | 1,06 | up   |
| 6544705 | 7126658 | 1193141 | similar to RIKEN cDNA 5730509K17 gene | RGD1561042 | 498386 | 1,49 | down |
| 6549950 | 7126658 | 1193174 | similar to RIKEN cDNA 5730509K17 gene | RGD1561042 | 498386 | 1,17 | up   |
| 6554181 | 7126658 | 1193131 | similar to RIKEN cDNA 5730509K17 gene | RGD1561042 | 498386 | 1,31 | up   |
| 6581029 | 7126658 | 1193147 | similar to RIKEN cDNA 5730509K17 gene | RGD1561042 | 498386 | 1,31 | down |
| 6587128 | 7126658 | 1193165 | similar to RIKEN cDNA 5730509K17 gene | RGD1561042 | 498386 | 1,65 | up   |
| 6592909 | 7126658 | 1193134 | similar to RIKEN cDNA 5730509K17 gene | RGD1561042 | 498386 | 1,15 | up   |
| 6634874 | 7126658 | 1193157 | similar to RIKEN cDNA 5730509K17 gene | RGD1561042 | 498386 | 1,62 | up   |
| 6660383 | 7126658 | 1193133 | similar to RIKEN cDNA 5730509K17 gene | RGD1561042 | 498386 | 1,48 | down |
| 6668671 | 7126658 | 1193129 | similar to RIKEN cDNA 5730509K17 gene | RGD1561042 | 498386 | 1,65 | up   |
| 6725687 | 7126658 | 1193137 | similar to RIKEN cDNA 5730509K17 gene | RGD1561042 | 498386 | 1,13 | up   |
| 5672414 | 7117424 | 1170740 | similar to RIKEN cDNA 9930032O22 gene | RGD1306446 | 289546 | 1,18 | down |
| 5719037 | 7117424 | 1170736 | similar to RIKEN cDNA 9930032O22 gene | RGD1306446 | 289546 | 1,12 | down |
| 5740627 | 7117424 | 1170732 | similar to RIKEN cDNA 9930032O22 gene | RGD1306446 | 289546 | 1,52 | down |
| 5841325 | 7117424 | 1170739 | similar to RIKEN cDNA 9930032O22 gene | RGD1306446 | 289546 | 1,05 | up   |
| 6000941 | 7117424 | 1170735 | similar to RIKEN cDNA 9930032O22 gene | RGD1306446 | 289546 | 1,10 | up   |
| 6189833 | 7117424 | 1170734 | similar to RIKEN cDNA 9930032O22 gene | RGD1306446 | 289546 | 1,05 | up   |
| 6367912 | 7117424 | 1170738 | similar to RIKEN cDNA 9930032O22 gene | RGD1306446 | 289546 | 1,24 | down |
| 6475513 | 7117424 | 1170739 | similar to RIKEN cDNA 9930032O22 gene | RGD1306446 | 289546 | 2,05 | down |
| 6504967 | 7117424 | 1170735 | similar to RIKEN cDNA 9930032O22 gene | RGD1306446 | 289546 | 1,04 | up   |
| 6571575 | 7117424 | 1170738 | similar to RIKEN cDNA 9930032O22 gene | RGD1306446 | 289546 | 1,12 | down |
| 6576623 | 7117424 | 1170737 | similar to RIKEN cDNA 9930032O22 gene | RGD1306446 | 289546 | 1,01 | up   |
| 6718599 | 7117424 | 1170733 | similar to RIKEN cDNA 9930032O22 gene | RGD1306446 | 289546 | 1,02 | up   |
| 6746225 | 7117424 | 1170741 | similar to RIKEN cDNA 9930032O22 gene | RGD1306446 | 289546 | 1,28 | up   |
| 5620785 | 7199341 | 1374137 | similar to RIKEN cDNA A630047E20      | RGD1307816 | 295446 | 1,41 | up   |
| 5624521 | 7199341 | 1374180 | similar to RIKEN cDNA A630047E20      | RGD1307816 | 295446 | 1,28 | up   |
| 5639640 | 7199341 | 1374131 | similar to RIKEN cDNA A630047E20      | RGD1307816 | 295446 | 1,06 | down |
| 5679461 | 7199341 | 1374144 | similar to RIKEN cDNA A630047E20      | RGD1307816 | 295446 | 1,54 | down |
| 5686336 | 7199341 | 1374132 | similar to RIKEN cDNA A630047E20      | RGD1307816 | 295446 | 1,02 | up   |
| 5686510 | 7199341 | 1374147 | similar to RIKEN cDNA A630047E20      | RGD1307816 | 295446 | 1,45 | up   |
| 5753290 | 7199341 | 1374180 | similar to RIKEN cDNA A630047E20      | RGD1307816 | 295446 | 1,37 | down |
| 5801699 | 7199341 | 1374179 | similar to RIKEN cDNA A630047E20      | RGD1307816 | 295446 | 1,48 | up   |
| 5848349 | 7199341 | 1374180 | similar to RIKEN cDNA A630047E20      | RGD1307816 | 295446 | 2,50 | up   |
| 5892247 | 7199341 | 1374135 | similar to RIKEN cDNA A630047E20      | RGD1307816 | 295446 | 1,21 | up   |
| 6076541 | 7199341 | 1374125 | similar to RIKEN cDNA A630047E20      | RGD1307816 | 295446 | 1,19 | down |
| 6102135 | 7199341 | 1374134 | similar to RIKEN cDNA A630047E20      | RGD1307816 | 295446 | 1,26 | up   |
| 6122660 | 7199341 | 1374179 | similar to RIKEN cDNA A630047E20      | RGD1307816 | 295446 | 1,06 | up   |
| 6132129 | 7199341 | 1374128 | similar to RIKEN cDNA A630047E20      | RGD1307816 | 295446 | 1,00 | up   |
| 6175094 | 7199341 | 1374143 | similar to RIKEN cDNA A630047E20      | RGD1307816 | 295446 | 1,51 | up   |
| 6190298 | 7199341 | 1374152 | similar to RIKEN cDNA A630047E20      | RGD1307816 | 295446 | 1,24 | down |
| 6193005 | 7199341 | 1374146 | similar to RIKEN cDNA A630047E20      | RGD1307816 | 295446 | 1,06 | up   |
| 6213282 | 7199341 | 1374139 | similar to RIKEN cDNA A630047E20      | RGD1307816 | 295446 | 1,23 | down |
| 6349182 | 7199341 | 1374138 | similar to RIKEN cDNA A630047E20      | RGD1307816 | 295446 | 1,88 | down |
| 6372113 | 7199341 | 1374159 | similar to RIKEN cDNA A630047E20      | RGD1307816 | 295446 | 1,15 | down |
| 6377925 | 7199341 | 1374136 | similar to RIKEN cDNA A630047E20      | RGD1307816 | 295446 | 1,11 | down |
| 6388463 | 7199341 | 1374142 | similar to RIKEN cDNA A630047E20      | RGD1307816 | 295446 | 1,10 | down |
| 6406632 | 7199341 | 1374148 | similar to RIKEN cDNA A630047E20      | RGD1307816 | 295446 | 1,17 | down |
| 6481512 | 7199341 | 1374175 | similar to RIKEN cDNA A630047E20      | RGD1307816 | 295446 | 1,58 | up   |
| 6485084 | 7199341 | 1374145 | similar to RIKEN cDNA A630047E20      | RGD1307816 | 295446 | 1,12 | up   |
| 6540303 | 7199341 | 1374151 | similar to RIKEN cDNA A630047E20      | RGD1307816 | 295446 | 1,01 | up   |

|         |         |         |                                         |            |        |      |      |
|---------|---------|---------|-----------------------------------------|------------|--------|------|------|
| 6561857 | 7199341 | 1374125 | similar to RIKEN cDNA A630047E20        | RGD1307816 | 295446 | 1,12 | up   |
| 6563007 | 7199341 | 1374123 | similar to RIKEN cDNA A630047E20        | RGD1307816 | 295446 | 1,06 | down |
| 6570876 | 7199341 | 1374169 | similar to RIKEN cDNA A630047E20        | RGD1307816 | 295446 | 1,14 | up   |
| 6583077 | 7199341 | 1374179 | similar to RIKEN cDNA A630047E20        | RGD1307816 | 295446 | 1,56 | up   |
| 6611240 | 7199341 | 1374180 | similar to RIKEN cDNA A630047E20        | RGD1307816 | 295446 | 1,11 | up   |
| 6702026 | 7199341 | 1374141 | similar to RIKEN cDNA A630047E20        | RGD1307816 | 295446 | 1,61 | down |
| 6714830 | 7320234 | 1672984 | similar to RIKEN cDNA B930062P21 gene   | RGD1562562 | 500921 | 1,63 | down |
| 5722157 | 7329380 | 1693971 | similar to RIKEN cDNA C030006K11        | MGC94207   | 362946 | 1,44 | up   |
| 5741374 | 7329380 | 1693971 | similar to RIKEN cDNA C030006K11        | MGC94207   | 362946 | 1,33 | down |
| 5853232 | 7329380 | 1693973 | similar to RIKEN cDNA C030006K11        | MGC94207   | 362946 | 2,15 | down |
| 6001239 | 7329380 | 1693971 | similar to RIKEN cDNA C030006K11        | MGC94207   | 362946 | 1,11 | up   |
| 6228153 | 7329380 | 1693972 | similar to RIKEN cDNA C030006K11        | MGC94207   | 362946 | 1,04 | down |
| 6346605 | 7329380 | 1693971 | similar to RIKEN cDNA C030006K11        | MGC94207   | 362946 | 1,50 | down |
| 6423848 | 7329380 | 1693971 | similar to RIKEN cDNA C030006K11        | MGC94207   | 362946 | 1,17 | up   |
| 6474500 | 7329380 | 1693971 | similar to RIKEN cDNA C030006K11        | MGC94207   | 362946 | 1,23 | up   |
| 6559920 | 7329380 | 1693971 | similar to RIKEN cDNA C030006K11        | MGC94207   | 362946 | 1,09 | up   |
| 6671534 | 7329380 | 1693973 | similar to RIKEN cDNA C030006K11        | MGC94207   | 362946 | 1,18 | up   |
| 5657527 | 7225205 | 1435091 | similar to RIKEN cDNA C430004E15        | LOC499749  | 499749 | 1,12 | down |
| 5684107 | 7225205 | 1435090 | similar to RIKEN cDNA C430004E15        | LOC499749  | 499749 | 1,63 | up   |
| 5692039 | 7225205 | 1435092 | similar to RIKEN cDNA C430004E15        | LOC499749  | 499749 | 1,38 | down |
| 5982664 | 7225205 | 1435095 | similar to RIKEN cDNA C430004E15        | LOC499749  | 499749 | 2,29 | down |
| 6109162 | 7225205 | 1435090 | similar to RIKEN cDNA C430004E15        | LOC499749  | 499749 | 1,24 | up   |
| 6239832 | 7225205 | 1435090 | similar to RIKEN cDNA C430004E15        | LOC499749  | 499749 | 1,06 | up   |
| 6240239 | 7225205 | 1435094 | similar to RIKEN cDNA C430004E15        | LOC499749  | 499749 | 1,22 | down |
| 6324047 | 7225205 | 1435093 | similar to RIKEN cDNA C430004E15        | LOC499749  | 499749 | 1,44 | down |
| 6690204 | 7225205 | 1435090 | similar to RIKEN cDNA C430004E15        | LOC499749  | 499749 | 1,40 | up   |
| 5721436 | 7340304 | 1720867 | similar to RIKEN cDNA D330022A01 gene   | RGD1306603 | 363144 | 1,40 | down |
| 5890959 | 7340304 | 1720867 | similar to RIKEN cDNA D330022A01 gene   | RGD1306603 | 363144 | 1,92 | down |
| 6006304 | 7340304 | 1720865 | similar to RIKEN cDNA D330022A01 gene   | RGD1306603 | 363144 | 2,02 | down |
| 6574108 | 7340304 | 1720868 | similar to RIKEN cDNA D330022A01 gene   | RGD1306603 | 363144 | 1,51 | down |
| 5823072 | 7275674 | 1561668 | similar to RIKEN cDNA E130308A19        | RGD1310951 | 313202 | 1,06 | down |
| 5846982 | 7275674 | 1561659 | similar to RIKEN cDNA E130308A19        | RGD1310951 | 313202 | 1,18 | down |
| 6169550 | 7275674 | 1561659 | similar to RIKEN cDNA E130308A19        | RGD1310951 | 313202 | 1,38 | down |
| 5752899 | 7162959 | 1282082 | similar to RNA binding motif protein 24 | LOC690139  | 690139 | 2,00 | down |
| 5795807 | 7162959 | 1282082 | similar to RNA binding motif protein 24 | LOC690139  | 690139 | 1,02 | up   |
| 5914540 | 7162959 | 1282089 | similar to RNA binding motif protein 24 | LOC690139  | 690139 | 1,04 | up   |
| 5926726 | 7162959 | 1282082 | similar to RNA binding motif protein 24 | LOC690139  | 690139 | 1,06 | up   |
| 5970445 | 7162959 | 1282082 | similar to RNA binding motif protein 24 | LOC690139  | 690139 | 1,27 | up   |
| 6064632 | 7162959 | 1282086 | similar to RNA binding motif protein 24 | LOC690139  | 690139 | 2,02 | up   |
| 6113187 | 7162959 | 1282082 | similar to RNA binding motif protein 24 | LOC690139  | 690139 | 1,03 | up   |
| 6178115 | 7162959 | 1282087 | similar to RNA binding motif protein 24 | LOC690139  | 690139 | 1,48 | down |
| 6391869 | 7162959 | 1282089 | similar to RNA binding motif protein 24 | LOC690139  | 690139 | 1,91 | down |
| 6452130 | 7162959 | 1282082 | similar to RNA binding motif protein 24 | LOC690139  | 690139 | 1,09 | up   |
| 5661159 | 7351953 | 1749860 | similar to RP3-330M21.4                 | RGD1559518 | 316229 | 1,04 | up   |
| 5692810 | 7351953 | 1749880 | similar to RP3-330M21.4                 | RGD1559518 | 316229 | 1,10 | up   |
| 5866423 | 7351953 | 1749865 | similar to RP3-330M21.4                 | RGD1559518 | 316229 | 1,63 | up   |
| 5989293 | 7351953 | 1749880 | similar to RP3-330M21.4                 | RGD1559518 | 316229 | 1,79 | down |
| 6121412 | 7351953 | 1749866 | similar to RP3-330M21.4                 | RGD1559518 | 316229 | 1,45 | down |
| 6153585 | 7351953 | 1749879 | similar to RP3-330M21.4                 | RGD1559518 | 316229 | 1,10 | up   |
| 6274948 | 7351953 | 1749879 | similar to RP3-330M21.4                 | RGD1559518 | 316229 | 1,07 | down |
| 6296892 | 7351953 | 1749874 | similar to RP3-330M21.4                 | RGD1559518 | 316229 | 1,02 | up   |
| 6298343 | 7351953 | 1749869 | similar to RP3-330M21.4                 | RGD1559518 | 316229 | 1,05 | down |
| 6301972 | 7351953 | 1749867 | similar to RP3-330M21.4                 | RGD1559518 | 316229 | 1,10 | down |
| 6302487 | 7351953 | 1749872 | similar to RP3-330M21.4                 | RGD1559518 | 316229 | 1,15 | up   |
| 6396536 | 7351953 | 1749873 | similar to RP3-330M21.4                 | RGD1559518 | 316229 | 1,10 | up   |
| 6434188 | 7351953 | 1749879 | similar to RP3-330M21.4                 | RGD1559518 | 316229 | 1,03 | down |

|         |         |         |                                                                                                                         |            |        |      |      |
|---------|---------|---------|-------------------------------------------------------------------------------------------------------------------------|------------|--------|------|------|
| 6469184 | 7351953 | 1749870 | similar to RP3-330M21.4                                                                                                 | RGD1559518 | 316229 | 1,26 | up   |
| 6505921 | 7351953 | 1749864 | similar to RP3-330M21.4                                                                                                 | RGD1559518 | 316229 | 1,72 | down |
| 6508790 | 7351953 | 1749874 | similar to RP3-330M21.4                                                                                                 | RGD1559518 | 316229 | 1,30 | down |
| 6528755 | 7351953 | 1749879 | similar to RP3-330M21.4                                                                                                 | RGD1559518 | 316229 | 1,88 | down |
| 6577417 | 7351953 | 1749868 | similar to RP3-330M21.4                                                                                                 | RGD1559518 | 316229 | 1,02 | up   |
| 6610414 | 7351953 | 1749879 | similar to RP3-330M21.4                                                                                                 | RGD1559518 | 316229 | 1,59 | down |
| 6674795 | 7351953 | 1749871 | similar to RP3-330M21.4                                                                                                 | RGD1559518 | 316229 | 1,02 | up   |
| 6021572 | 7220882 | 1424991 | similar to RT1 class II histocompatibility antigen, B-1 beta chain precursor (RT1.IOC688090 /// RT1-E 688090 /// 309622 |            |        | 3,62 | up   |
| 6254811 | 7220882 | 1424992 | similar to RT1 class II histocompatibility antigen, B-1 beta chain precursor (RT1.IOC688090 /// RT1-E 688090 /// 309622 |            |        | 1,30 | up   |
| 5743372 | 7049399 | 1008392 | similar to ryanodine receptor 1 (skeletal)                                                                              | LOC686059  | 686059 | 1,80 | down |
| 5685735 | 7062927 | 1038651 | similar to S. cerevisiae SEC31-like 2 isoform a                                                                         | LOC309433  | 309433 | 1,32 | up   |
| 5729670 | 7062927 | 1038624 | similar to S. cerevisiae SEC31-like 2 isoform a                                                                         | LOC309433  | 309433 | 1,10 | up   |
| 5747583 | 7062927 | 1038638 | similar to S. cerevisiae SEC31-like 2 isoform a                                                                         | LOC309433  | 309433 | 1,12 | up   |
| 5784745 | 7062927 | 1038645 | similar to S. cerevisiae SEC31-like 2 isoform a                                                                         | LOC309433  | 309433 | 1,10 | down |
| 5796919 | 7062927 | 1038643 | similar to S. cerevisiae SEC31-like 2 isoform a                                                                         | LOC309433  | 309433 | 1,06 | up   |
| 5889975 | 7062927 | 1038626 | similar to S. cerevisiae SEC31-like 2 isoform a                                                                         | LOC309433  | 309433 | 1,08 | up   |
| 5954264 | 7062927 | 1038628 | similar to S. cerevisiae SEC31-like 2 isoform a                                                                         | LOC309433  | 309433 | 1,44 | up   |
| 5999722 | 7062927 | 1038639 | similar to S. cerevisiae SEC31-like 2 isoform a                                                                         | LOC309433  | 309433 | 1,09 | up   |
| 6070657 | 7062927 | 1038626 | similar to S. cerevisiae SEC31-like 2 isoform a                                                                         | LOC309433  | 309433 | 1,11 | up   |
| 6096963 | 7062927 | 1038631 | similar to S. cerevisiae SEC31-like 2 isoform a                                                                         | LOC309433  | 309433 | 1,19 | up   |
| 6099271 | 7062927 | 1038627 | similar to S. cerevisiae SEC31-like 2 isoform a                                                                         | LOC309433  | 309433 | 1,11 | up   |
| 6104285 | 7062927 | 1038642 | similar to S. cerevisiae SEC31-like 2 isoform a                                                                         | LOC309433  | 309433 | 2,12 | down |
| 6190308 | 7062927 | 1038644 | similar to S. cerevisiae SEC31-like 2 isoform a                                                                         | LOC309433  | 309433 | 1,38 | down |
| 6248769 | 7062927 | 1038636 | similar to S. cerevisiae SEC31-like 2 isoform a                                                                         | LOC309433  | 309433 | 1,75 | up   |
| 6283271 | 7062927 | 1038643 | similar to S. cerevisiae SEC31-like 2 isoform a                                                                         | LOC309433  | 309433 | 1,17 | down |
| 6296082 | 7062927 | 1038621 | similar to S. cerevisiae SEC31-like 2 isoform a                                                                         | LOC309433  | 309433 | 1,08 | up   |
| 6297670 | 7062927 | 1038634 | similar to S. cerevisiae SEC31-like 2 isoform a                                                                         | LOC309433  | 309433 | 1,31 | down |
| 6307223 | 7062927 | 1038649 | similar to S. cerevisiae SEC31-like 2 isoform a                                                                         | LOC309433  | 309433 | 1,05 | down |
| 6338976 | 7062927 | 1038632 | similar to S. cerevisiae SEC31-like 2 isoform a                                                                         | LOC309433  | 309433 | 1,00 | up   |
| 6363087 | 7062927 | 1038643 | similar to S. cerevisiae SEC31-like 2 isoform a                                                                         | LOC309433  | 309433 | 1,37 | up   |
| 6382913 | 7062927 | 1038650 | similar to S. cerevisiae SEC31-like 2 isoform a                                                                         | LOC309433  | 309433 | 1,06 | up   |
| 6434094 | 7062927 | 1038647 | similar to S. cerevisiae SEC31-like 2 isoform a                                                                         | LOC309433  | 309433 | 1,22 | down |
| 6503183 | 7062927 | 1038633 | similar to S. cerevisiae SEC31-like 2 isoform a                                                                         | LOC309433  | 309433 | 1,39 | up   |
| 6638133 | 7062927 | 1038646 | similar to S. cerevisiae SEC31-like 2 isoform a                                                                         | LOC309433  | 309433 | 1,23 | down |
| 6639906 | 7062927 | 1038648 | similar to S. cerevisiae SEC31-like 2 isoform a                                                                         | LOC309433  | 309433 | 1,43 | down |
| 6641579 | 7062927 | 1038640 | similar to S. cerevisiae SEC31-like 2 isoform a                                                                         | LOC309433  | 309433 | 1,43 | up   |
| 6690033 | 7062927 | 1038635 | similar to S. cerevisiae SEC31-like 2 isoform a                                                                         | LOC309433  | 309433 | 1,24 | down |
| 6730625 | 7062927 | 1038623 | similar to S. cerevisiae SEC31-like 2 isoform a                                                                         | LOC309433  | 309433 | 1,19 | up   |
| 5620602 | 7367971 | 1789133 | similar to scaffold attachment factor B2                                                                                | LOC301126  | 301126 | 1,06 | down |
| 5644907 | 7367971 | 1789129 | similar to scaffold attachment factor B2                                                                                | LOC301126  | 301126 | 1,05 | up   |
| 5658404 | 7367971 | 1789119 | similar to scaffold attachment factor B2                                                                                | LOC301126  | 301126 | 1,05 | up   |
| 5676050 | 7367971 | 1789127 | similar to scaffold attachment factor B2                                                                                | LOC301126  | 301126 | 1,46 | down |
| 5703010 | 7367971 | 1789123 | similar to scaffold attachment factor B2                                                                                | LOC301126  | 301126 | 1,40 | down |
| 5725854 | 7367971 | 1789134 | similar to scaffold attachment factor B2                                                                                | LOC301126  | 301126 | 1,30 | down |
| 5732459 | 7367971 | 1789123 | similar to scaffold attachment factor B2                                                                                | LOC301126  | 301126 | 1,29 | down |
| 5788667 | 7367971 | 1789112 | similar to scaffold attachment factor B2                                                                                | LOC301126  | 301126 | 1,02 | down |
| 5893050 | 7367971 | 1789132 | similar to scaffold attachment factor B2                                                                                | LOC301126  | 301126 | 1,15 | down |
| 5945779 | 7367971 | 1789129 | similar to scaffold attachment factor B2                                                                                | LOC301126  | 301126 | 1,21 | down |
| 5962671 | 7367971 | 1789110 | similar to scaffold attachment factor B2                                                                                | LOC301126  | 301126 | 1,04 | down |
| 5983521 | 7367971 | 1789111 | similar to scaffold attachment factor B2                                                                                | LOC301126  | 301126 | 1,35 | down |
| 6030935 | 7367971 | 1789130 | similar to scaffold attachment factor B2                                                                                | LOC301126  | 301126 | 1,01 | up   |
| 6069495 | 7367971 | 1789121 | similar to scaffold attachment factor B2                                                                                | LOC301126  | 301126 | 1,12 | up   |
| 6091662 | 7367971 | 1789131 | similar to scaffold attachment factor B2                                                                                | LOC301126  | 301126 | 1,41 | down |
| 6158266 | 7367971 | 1789123 | similar to scaffold attachment factor B2                                                                                | LOC301126  | 301126 | 1,01 | up   |
| 6249770 | 7367971 | 1789114 | similar to scaffold attachment factor B2                                                                                | LOC301126  | 301126 | 1,00 | up   |
| 6304498 | 7367971 | 1789119 | similar to scaffold attachment factor B2                                                                                | LOC301126  | 301126 | 1,21 | up   |

|         |         |         |                                                                           |            |        |      |      |
|---------|---------|---------|---------------------------------------------------------------------------|------------|--------|------|------|
| 6322644 | 7367971 | 1789128 | similar to scaffold attachment factor B2                                  | LOC301126  | 301126 | 1,09 | down |
| 6345770 | 7367971 | 1789108 | similar to scaffold attachment factor B2                                  | LOC301126  | 301126 | 1,07 | down |
| 6391316 | 7367971 | 1789118 | similar to scaffold attachment factor B2                                  | LOC301126  | 301126 | 1,23 | up   |
| 6403231 | 7367971 | 1789112 | similar to scaffold attachment factor B2                                  | LOC301126  | 301126 | 1,03 | down |
| 6412599 | 7367971 | 1789134 | similar to scaffold attachment factor B2                                  | LOC301126  | 301126 | 1,15 | up   |
| 6418800 | 7367971 | 1789134 | similar to scaffold attachment factor B2                                  | LOC301126  | 301126 | 3,28 | down |
| 6445880 | 7367971 | 1789116 | similar to scaffold attachment factor B2                                  | LOC301126  | 301126 | 1,18 | up   |
| 6721263 | 7367971 | 1789120 | similar to scaffold attachment factor B2                                  | LOC301126  | 301126 | 1,51 | down |
| 5623322 | 7055876 | 1022458 | similar to SET binding factor 2                                           | LOC691036  | 691036 | 1,46 | down |
| 5637175 | 7055876 | 1022457 | similar to SET binding factor 2                                           | LOC691036  | 691036 | 1,13 | down |
| 5653879 | 7055876 | 1022466 | similar to SET binding factor 2                                           | LOC691036  | 691036 | 1,01 | up   |
| 5668276 | 7055876 | 1022496 | similar to SET binding factor 2                                           | LOC691036  | 691036 | 1,42 | down |
| 5696648 | 7055876 | 1022461 | similar to SET binding factor 2                                           | LOC691036  | 691036 | 1,13 | down |
| 5702056 | 7055876 | 1022469 | similar to SET binding factor 2                                           | LOC691036  | 691036 | 1,08 | up   |
| 5743164 | 7055876 | 1022479 | similar to SET binding factor 2                                           | LOC691036  | 691036 | 1,03 | down |
| 5786165 | 7055876 | 1022502 | similar to SET binding factor 2                                           | LOC691036  | 691036 | 1,08 | up   |
| 5812429 | 7055876 | 1022464 | similar to SET binding factor 2                                           | LOC691036  | 691036 | 1,16 | up   |
| 5826017 | 7055876 | 1022521 | similar to SET binding factor 2                                           | LOC691036  | 691036 | 1,21 | down |
| 5876223 | 7055876 | 1022466 | similar to SET binding factor 2                                           | LOC691036  | 691036 | 1,02 | up   |
| 5877262 | 7055876 | 1022468 | similar to SET binding factor 2                                           | LOC691036  | 691036 | 1,36 | down |
| 5888270 | 7055876 | 1022492 | similar to SET binding factor 2                                           | LOC691036  | 691036 | 1,33 | up   |
| 5893895 | 7055876 | 1022483 | similar to SET binding factor 2                                           | LOC691036  | 691036 | 1,21 | up   |
| 5934001 | 7055876 | 1022515 | similar to SET binding factor 2                                           | LOC691036  | 691036 | 1,10 | down |
| 5936562 | 7055876 | 1022483 | similar to SET binding factor 2                                           | LOC691036  | 691036 | 1,11 | down |
| 5941712 | 7055876 | 1022478 | similar to SET binding factor 2                                           | LOC691036  | 691036 | 1,06 | up   |
| 5946527 | 7055876 | 1022497 | similar to SET binding factor 2                                           | LOC691036  | 691036 | 1,68 | down |
| 5973328 | 7055876 | 1022482 | similar to SET binding factor 2                                           | LOC691036  | 691036 | 1,02 | down |
| 5987989 | 7055876 | 1022467 | similar to SET binding factor 2                                           | LOC691036  | 691036 | 1,07 | down |
| 6064219 | 7055876 | 1022495 | similar to SET binding factor 2                                           | LOC691036  | 691036 | 1,26 | down |
| 6077287 | 7055876 | 1022460 | similar to SET binding factor 2                                           | LOC691036  | 691036 | 1,57 | down |
| 6080304 | 7055876 | 1022465 | similar to SET binding factor 2                                           | LOC691036  | 691036 | 1,05 | down |
| 6087757 | 7055876 | 1022462 | similar to SET binding factor 2                                           | LOC691036  | 691036 | 1,16 | up   |
| 6088981 | 7055876 | 1022504 | similar to SET binding factor 2                                           | LOC691036  | 691036 | 1,01 | down |
| 6091359 | 7055876 | 1022499 | similar to SET binding factor 2                                           | LOC691036  | 691036 | 1,12 | up   |
| 6098912 | 7055876 | 1022512 | similar to SET binding factor 2                                           | RGD1559442 | 308934 | 1,23 | up   |
| 6109531 | 7055876 | 1022503 | similar to SET binding factor 2                                           | LOC691036  | 691036 | 1,11 | up   |
| 6235571 | 7055876 | 1022467 | similar to SET binding factor 2                                           | LOC691036  | 691036 | 1,05 | down |
| 6243774 | 7055876 | 1022476 | similar to SET binding factor 2                                           | LOC691036  | 691036 | 1,22 | up   |
| 6254497 | 7055876 | 1022480 | similar to SET binding factor 2                                           | LOC691036  | 691036 | 1,01 | down |
| 6291492 | 7055876 | 1022484 | similar to SET binding factor 2                                           | LOC691036  | 691036 | 1,05 | down |
| 6349902 | 7055876 | 1022463 | similar to SET binding factor 2                                           | LOC691036  | 691036 | 1,21 | down |
| 6400402 | 7055876 | 1022508 | similar to SET binding factor 2                                           | LOC691036  | 691036 | 1,08 | up   |
| 6421933 | 7055876 | 1022498 | similar to SET binding factor 2                                           | LOC691036  | 691036 | 1,07 | up   |
| 6434122 | 7055876 | 1022477 | similar to SET binding factor 2                                           | LOC691036  | 691036 | 1,16 | down |
| 6490698 | 7055876 | 1022500 | similar to SET binding factor 2                                           | LOC691036  | 691036 | 1,04 | down |
| 6518927 | 7055876 | 1022507 | similar to SET binding factor 2                                           | LOC691036  | 691036 | 1,15 | up   |
| 6538639 | 7055876 | 1022501 | similar to SET binding factor 2                                           | LOC691036  | 691036 | 1,05 | down |
| 6567767 | 7055876 | 1022457 | similar to SET binding factor 2                                           | LOC691036  | 691036 | 3,25 | down |
| 6617941 | 7055876 | 1022460 | similar to SET binding factor 2                                           | LOC691036  | 691036 | 1,21 | down |
| 6677464 | 7055876 | 1022488 | similar to SET binding factor 2                                           | LOC691036  | 691036 | 1,06 | up   |
| 6685509 | 7055876 | 1022481 | similar to SET binding factor 2                                           | LOC691036  | 691036 | 1,08 | down |
| 6688525 | 7055876 | 1022506 | similar to SET binding factor 2                                           | LOC691036  | 691036 | 1,20 | up   |
| 6689255 | 7055876 | 1022503 | similar to SET binding factor 2                                           | LOC691036  | 691036 | 1,27 | down |
| 6721407 | 7055876 | 1022474 | similar to SET binding factor 2                                           | LOC691036  | 691036 | 1,17 | up   |
| 6746918 | 7055876 | 1022521 | similar to SET binding factor 2                                           | LOC691036  | 691036 | 1,14 | up   |
| 5632969 | 7339286 | 1718073 | similar to solute carrier family 9 (sodium/hydrogen exchanger), isoform 9 | RGD1560736 | 363115 | 1,46 | down |

|         |         |         |                                                                           |            |        |      |      |
|---------|---------|---------|---------------------------------------------------------------------------|------------|--------|------|------|
| 5673002 | 7339286 | 1718113 | similar to solute carrier family 9 (sodium/hydrogen exchanger), isoform 9 | RGD1560736 | 363115 | 1,20 | up   |
| 5705605 | 7339286 | 1718110 | similar to solute carrier family 9 (sodium/hydrogen exchanger), isoform 9 | RGD1560736 | 363115 | 1,08 | up   |
| 5756412 | 7339286 | 1718028 | similar to solute carrier family 9 (sodium/hydrogen exchanger), isoform 9 | RGD1560736 | 363115 | 1,02 | up   |
| 5881258 | 7339286 | 1718116 | similar to solute carrier family 9 (sodium/hydrogen exchanger), isoform 9 | RGD1560736 | 363115 | 1,35 | up   |
| 6036485 | 7339286 | 1718036 | similar to solute carrier family 9 (sodium/hydrogen exchanger), isoform 9 | RGD1560736 | 363115 | 1,08 | down |
| 6063812 | 7339286 | 1718077 | similar to solute carrier family 9 (sodium/hydrogen exchanger), isoform 9 | RGD1560736 | 363115 | 1,01 | up   |
| 6066477 | 7339286 | 1718028 | similar to solute carrier family 9 (sodium/hydrogen exchanger), isoform 9 | RGD1560736 | 363115 | 1,10 | up   |
| 6066759 | 7339286 | 1718035 | similar to solute carrier family 9 (sodium/hydrogen exchanger), isoform 9 | RGD1560736 | 363115 | 1,01 | down |
| 6078033 | 7339286 | 1718033 | similar to solute carrier family 9 (sodium/hydrogen exchanger), isoform 9 | RGD1560736 | 363115 | 1,02 | up   |
| 6159564 | 7339286 | 1718071 | similar to solute carrier family 9 (sodium/hydrogen exchanger), isoform 9 | RGD1560736 | 363115 | 1,00 | down |
| 6205911 | 7339286 | 1718055 | similar to solute carrier family 9 (sodium/hydrogen exchanger), isoform 9 | RGD1560736 | 363115 | 1,05 | down |
| 6230043 | 7339286 | 1718084 | similar to solute carrier family 9 (sodium/hydrogen exchanger), isoform 9 | RGD1560736 | 363115 | 1,11 | down |
| 6293647 | 7339286 | 1718028 | similar to solute carrier family 9 (sodium/hydrogen exchanger), isoform 9 | RGD1560736 | 363115 | 1,35 | up   |
| 6363228 | 7339286 | 1718113 | similar to solute carrier family 9 (sodium/hydrogen exchanger), isoform 9 | RGD1560736 | 363115 | 2,18 | down |
| 6380233 | 7339286 | 1718116 | similar to solute carrier family 9 (sodium/hydrogen exchanger), isoform 9 | RGD1560736 | 363115 | 1,36 | down |
| 6422448 | 7339286 | 1718115 | similar to solute carrier family 9 (sodium/hydrogen exchanger), isoform 9 | RGD1560736 | 363115 | 1,05 | up   |
| 6449170 | 7339286 | 1718106 | similar to solute carrier family 9 (sodium/hydrogen exchanger), isoform 9 | RGD1560736 | 363115 | 1,42 | down |
| 6567724 | 7339286 | 1718116 | similar to solute carrier family 9 (sodium/hydrogen exchanger), isoform 9 | RGD1560736 | 363115 | 1,17 | down |
| 6590266 | 7339286 | 1718076 | similar to solute carrier family 9 (sodium/hydrogen exchanger), isoform 9 | RGD1560736 | 363115 | 1,28 | up   |
| 6325878 | 7218728 | 1419914 | similar to spatial-delta                                                  | RGD1561665 | 499429 | 1,55 | up   |
| 6559956 | 7218728 | 1419929 | similar to spatial-delta                                                  | RGD1561665 | 499429 | 1,00 | up   |
| 5702504 | 7370763 | 1798112 | similar to spermatogenesis associated glutamate (E)-rich protein 4d       | LOC501307  | 501307 | 2,07 | up   |
| 5764271 | 7370763 | 1798112 | similar to spermatogenesis associated glutamate (E)-rich protein 4d       | LOC501307  | 501307 | 1,19 | down |
| 5858070 | 7370763 | 1798116 | similar to spermatogenesis associated glutamate (E)-rich protein 4d       | LOC501307  | 501307 | 1,64 | up   |
| 5879025 | 7370763 | 1798114 | similar to spermatogenesis associated glutamate (E)-rich protein 4d       | LOC501307  | 501307 | 1,06 | down |
| 5891010 | 7370763 | 1798114 | similar to spermatogenesis associated glutamate (E)-rich protein 4d       | LOC501307  | 501307 | 1,25 | up   |
| 6169092 | 7368374 | 1790640 | similar to spermatogenesis associated glutamate (E)-rich protein 4d       | LOC501386  | 501386 | 1,17 | down |
| 6252612 | 7370763 | 1798112 | similar to spermatogenesis associated glutamate (E)-rich protein 4d       | LOC501307  | 501307 | 1,07 | down |
| 6387252 | 7368374 | 1790639 | similar to spermatogenesis associated glutamate (E)-rich protein 4d       | LOC685805  | 685805 | 2,34 | down |
| 6407184 | 7371446 | 1800086 | similar to spermatogenesis associated glutamate (E)-rich protein 4d       | LOC685805  | 685805 | 2,19 | down |
| 6416780 | 7370763 | 1798112 | similar to spermatogenesis associated glutamate (E)-rich protein 4d       | LOC501307  | 501307 | 1,28 | down |
| 6450321 | 7370763 | 1798113 | similar to spermatogenesis associated glutamate (E)-rich protein 4d       | LOC501307  | 501307 | 1,17 | up   |
| 6528895 | 7370763 | 1798112 | similar to spermatogenesis associated glutamate (E)-rich protein 4d       | LOC501307  | 501307 | 1,36 | down |
| 6595703 | 7370763 | 1798112 | similar to spermatogenesis associated glutamate (E)-rich protein 4d       | LOC501307  | 501307 | 1,72 | down |
| 6192617 | 7368729 | 1792037 | similar to Spindlin-like protein 2 (SPIN-2)                               | LOC367471  | 367471 | 1,05 | up   |
| 6045441 | 7331297 | 1698822 | similar to splicing factor, arginine/serine-rich 2, interacting protein   | LOC681974  | 681974 | 1,20 | down |
| 6474152 | 7331297 | 1698824 | similar to splicing factor, arginine/serine-rich 2, interacting protein   | LOC681974  | 681974 | 1,03 | up   |
| 5725202 | 7337845 | 1714357 | similar to suppressor of hairy wing homolog 4 isoform 1                   | RGD1560796 | 315798 | 1,30 | up   |
| 5870948 | 7337845 | 1714349 | similar to suppressor of hairy wing homolog 4 isoform 1                   | RGD1560796 | 315798 | 1,05 | up   |
| 5936997 | 7337845 | 1714347 | similar to suppressor of hairy wing homolog 4 isoform 1                   | RGD1560796 | 315798 | 1,24 | down |
| 5965826 | 7337845 | 1714357 | similar to suppressor of hairy wing homolog 4 isoform 1                   | RGD1560796 | 315798 | 1,70 | up   |
| 6150534 | 7337845 | 1714354 | similar to suppressor of hairy wing homolog 4 isoform 1                   | RGD1560796 | 315798 | 1,30 | down |
| 6177725 | 7337845 | 1714356 | similar to suppressor of hairy wing homolog 4 isoform 1                   | RGD1560796 | 315798 | 1,06 | down |
| 6233057 | 7337845 | 1714350 | similar to suppressor of hairy wing homolog 4 isoform 1                   | RGD1560796 | 315798 | 1,34 | up   |
| 6377287 | 7337845 | 1714352 | similar to suppressor of hairy wing homolog 4 isoform 1                   | RGD1560796 | 315798 | 1,14 | down |
| 6631122 | 7337845 | 1714352 | similar to suppressor of hairy wing homolog 4 isoform 1                   | RGD1560796 | 315798 | 1,26 | up   |
| 6699376 | 7337845 | 1714348 | similar to suppressor of hairy wing homolog 4 isoform 1                   | RGD1560796 | 315798 | 1,01 | up   |
| 5622584 | 7200996 | 1378149 | similar to T06D8.1a                                                       | LOC295528  | 295528 | 1,01 | up   |
| 5643415 | 7200996 | 1378134 | similar to T06D8.1a                                                       | LOC295528  | 295528 | 1,33 | up   |
| 5869389 | 7200996 | 1378134 | similar to T06D8.1a                                                       | LOC295528  | 295528 | 1,39 | up   |
| 6103195 | 7200996 | 1378146 | similar to T06D8.1a                                                       | LOC295528  | 295528 | 1,22 | up   |
| 6358324 | 7200996 | 1378147 | similar to T06D8.1a                                                       | LOC295528  | 295528 | 1,42 | down |
| 6448215 | 7200996 | 1378140 | similar to T06D8.1a                                                       | LOC295528  | 295528 | 1,35 | down |
| 6655670 | 7200996 | 1378141 | similar to T06D8.1a                                                       | LOC295528  | 295528 | 1,10 | down |
| 5628144 | 7361420 | 1773036 | similar to TBC1 domain family, member 8                                   | LOC680133  | 680133 | 1,01 | up   |
| 6112236 | 7361420 | 1773070 | similar to TBC1 domain family, member 8                                   | LOC680133  | 680133 | 1,12 | down |



|         |         |         |                                                                                      |            |        |      |      |
|---------|---------|---------|--------------------------------------------------------------------------------------|------------|--------|------|------|
| 5682574 | 7131550 | 1205561 | similar to T-cell receptor alpha chain precursor V and C regions (TRA29)             | RGD1359684 | 290071 | 1,06 | up   |
| 5819768 | 7131550 | 1205566 | similar to T-cell receptor alpha chain precursor V and C regions (TRA29)             | RGD1359684 | 290071 | 1,06 | up   |
| 5833289 | 7131550 | 1205560 | similar to T-cell receptor alpha chain precursor V and C regions (TRA29)             | RGD1359684 | 290071 | 1,61 | down |
| 5934451 | 7131550 | 1205561 | similar to T-cell receptor alpha chain precursor V and C regions (TRA29)             | RGD1359684 | 290071 | 1,20 | down |
| 6122086 | 7131550 | 1205561 | similar to T-cell receptor alpha chain precursor V and C regions (TRA29)             | RGD1359684 | 290071 | 1,81 | down |
| 6138153 | 7131550 | 1205568 | similar to T-cell receptor alpha chain precursor V and C regions (TRA29)             | RGD1359684 | 290071 | 1,19 | up   |
| 6188778 | 7131550 | 1205569 | similar to T-cell receptor alpha chain precursor V and C regions (TRA29)             | RGD1359684 | 290071 | 1,23 | up   |
| 6338149 | 7131550 | 1205570 | similar to T-cell receptor alpha chain precursor V and C regions (TRA29)             | RGD1359684 | 290071 | 1,08 | up   |
| 6547613 | 7131550 | 1205564 | similar to T-cell receptor alpha chain precursor V and C regions (TRA29)             | RGD1359684 | 290071 | 1,11 | up   |
| 6019057 | 7181590 | 1329425 | similar to testis nuclear RNA-binding protein-like                                   | RGD1560949 | 292057 | 1,36 | up   |
| 6057339 | 7181590 | 1329424 | similar to testis nuclear RNA-binding protein-like                                   | RGD1560949 | 292057 | 1,04 | down |
| 6579519 | 7181590 | 1329431 | similar to testis nuclear RNA-binding protein-like                                   | RGD1560949 | 292057 | 1,34 | up   |
| 6580861 | 7181590 | 1329432 | similar to testis nuclear RNA-binding protein-like                                   | RGD1560949 | 292057 | 1,04 | up   |
| 6621514 | 7181590 | 1329431 | similar to testis nuclear RNA-binding protein-like                                   | RGD1560949 | 292057 | 1,03 | down |
| 6727238 | 7181590 | 1329433 | similar to testis nuclear RNA-binding protein-like                                   | RGD1560949 | 292057 | 1,65 | down |
| 5648521 | 7192696 | 1357153 | similar to Traf2 and NCK interacting kinase, splice variant 4                        | RGD1561817 | 294917 | 1,12 | up   |
| 5673791 | 7192696 | 1357168 | similar to Traf2 and NCK interacting kinase, splice variant 4                        | RGD1561817 | 294917 | 1,08 | down |
| 5834267 | 7192696 | 1357151 | similar to Traf2 and NCK interacting kinase, splice variant 4                        | RGD1561817 | 294917 | 1,29 | up   |
| 5852932 | 7192696 | 1357150 | similar to Traf2 and NCK interacting kinase, splice variant 4                        | RGD1561817 | 294917 | 1,09 | up   |
| 5904234 | 7192696 | 1357157 | similar to Traf2 and NCK interacting kinase, splice variant 4                        | RGD1561817 | 294917 | 1,26 | up   |
| 5905269 | 7192696 | 1357177 | similar to Traf2 and NCK interacting kinase, splice variant 4                        | RGD1561817 | 294917 | 1,04 | down |
| 5968428 | 7192696 | 1357175 | similar to Traf2 and NCK interacting kinase, splice variant 4                        | RGD1561817 | 294917 | 1,68 | down |
| 6003837 | 7192696 | 1357152 | similar to Traf2 and NCK interacting kinase, splice variant 4                        | RGD1561817 | 294917 | 1,30 | up   |
| 6014957 | 7192696 | 1357149 | similar to Traf2 and NCK interacting kinase, splice variant 4                        | RGD1561817 | 294917 | 2,08 | up   |
| 6015909 | 7192696 | 1357134 | similar to Traf2 and NCK interacting kinase, splice variant 4                        | RGD1561817 | 294917 | 1,07 | down |
| 6026511 | 7192696 | 1357103 | similar to Traf2 and NCK interacting kinase, splice variant 4                        | RGD1561817 | 294917 | 1,53 | down |
| 6069447 | 7192696 | 1357178 | similar to Traf2 and NCK interacting kinase, splice variant 4                        | RGD1561817 | 294917 | 1,10 | down |
| 6077031 | 7192696 | 1357091 | similar to Traf2 and NCK interacting kinase, splice variant 4                        | RGD1561817 | 294917 | 1,03 | up   |
| 6078834 | 7192696 | 1357165 | similar to Traf2 and NCK interacting kinase, splice variant 4                        | RGD1561817 | 294917 | 1,23 | up   |
| 6149995 | 7192696 | 1357155 | similar to Traf2 and NCK interacting kinase, splice variant 4                        | RGD1561817 | 294917 | 1,27 | up   |
| 6185142 | 7192696 | 1357164 | similar to Traf2 and NCK interacting kinase, splice variant 4                        | RGD1561817 | 294917 | 1,25 | down |
| 6225137 | 7192696 | 1357143 | similar to Traf2 and NCK interacting kinase, splice variant 4                        | RGD1561817 | 294917 | 2,09 | down |
| 6334561 | 7192696 | 1357126 | similar to Traf2 and NCK interacting kinase, splice variant 4                        | RGD1561817 | 294917 | 1,02 | up   |
| 6344729 | 7192696 | 1357176 | similar to Traf2 and NCK interacting kinase, splice variant 4                        | RGD1561817 | 294917 | 1,04 | down |
| 6348569 | 7192696 | 1357143 | similar to Traf2 and NCK interacting kinase, splice variant 4                        | RGD1561817 | 294917 | 1,35 | up   |
| 6354276 | 7192696 | 1357142 | similar to Traf2 and NCK interacting kinase, splice variant 4                        | RGD1561817 | 294917 | 1,20 | up   |
| 6386705 | 7192696 | 1357158 | similar to Traf2 and NCK interacting kinase, splice variant 4                        | RGD1561817 | 294917 | 1,02 | down |
| 6423130 | 7192696 | 1357169 | similar to Traf2 and NCK interacting kinase, splice variant 4                        | RGD1561817 | 294917 | 1,05 | up   |
| 6429505 | 7192696 | 1357128 | similar to Traf2 and NCK interacting kinase, splice variant 4                        | RGD1561817 | 294917 | 1,53 | up   |
| 6471574 | 7192696 | 1357144 | similar to Traf2 and NCK interacting kinase, splice variant 4                        | RGD1561817 | 294917 | 1,04 | down |
| 6481632 | 7192696 | 1357135 | similar to Traf2 and NCK interacting kinase, splice variant 4                        | RGD1561817 | 294917 | 1,17 | up   |
| 6502287 | 7192696 | 1357133 | similar to Traf2 and NCK interacting kinase, splice variant 4                        | RGD1561817 | 294917 | 1,33 | down |
| 6547306 | 7192696 | 1357170 | similar to Traf2 and NCK interacting kinase, splice variant 4                        | RGD1561817 | 294917 | 1,37 | up   |
| 6564420 | 7192696 | 1357172 | similar to Traf2 and NCK interacting kinase, splice variant 4                        | RGD1561817 | 294917 | 1,20 | down |
| 6594257 | 7192696 | 1357171 | similar to Traf2 and NCK interacting kinase, splice variant 4                        | RGD1561817 | 294917 | 1,13 | up   |
| 6632958 | 7192696 | 1357139 | similar to Traf2 and NCK interacting kinase, splice variant 4                        | RGD1561817 | 294917 | 1,29 | up   |
| 6651564 | 7192696 | 1357140 | similar to Traf2 and NCK interacting kinase, splice variant 4                        | RGD1561817 | 294917 | 1,29 | up   |
| 5676886 | 7043379 | 993654  | similar to Transcription factor 7-like 2 (HMG box transcription factor 4) (T-cell-sf | LOC683733  | 683733 | 1,09 | down |
| 5858212 | 7043379 | 993650  | similar to Transcription factor 7-like 2 (HMG box transcription factor 4) (T-cell-sf | LOC683733  | 683733 | 1,12 | down |
| 6040232 | 7043379 | 993650  | similar to Transcription factor 7-like 2 (HMG box transcription factor 4) (T-cell-sf | LOC683733  | 683733 | 1,36 | down |
| 6149014 | 7043379 | 993651  | similar to Transcription factor 7-like 2 (HMG box transcription factor 4) (T-cell-sf | LOC683733  | 683733 | 1,41 | up   |
| 6364269 | 7043379 | 993654  | similar to Transcription factor 7-like 2 (HMG box transcription factor 4) (T-cell-sf | LOC683733  | 683733 | 1,40 | up   |
| 6517072 | 7043379 | 993602  | similar to Transcription factor 7-like 2 (HMG box transcription factor 4) (T-cell-sf | LOC683733  | 683733 | 1,91 | up   |
| 5618993 | 7258546 | 1518950 | similar to Transmembrane protein 16B                                                 | LOC683001  | 683001 | 1,22 | down |
| 5707673 | 7258546 | 1518965 | similar to Transmembrane protein 16B                                                 | LOC683001  | 683001 | 1,01 | up   |
| 5821330 | 7258546 | 1518969 | similar to Transmembrane protein 16B                                                 | LOC683001  | 683001 | 1,11 | up   |

|         |         |         |                                                                                  |            |        |      |      |
|---------|---------|---------|----------------------------------------------------------------------------------|------------|--------|------|------|
| 5829705 | 7258546 | 1519011 | similar to Transmembrane protein 16B                                             | LOC683001  | 683001 | 2,30 | down |
| 5908094 | 7258546 | 1519006 | similar to Transmembrane protein 16B                                             | LOC683001  | 683001 | 1,13 | down |
| 5927970 | 7258546 | 1518938 | similar to Transmembrane protein 16B                                             | LOC683001  | 683001 | 1,04 | down |
| 5953127 | 7258546 | 1518934 | similar to Transmembrane protein 16B                                             | LOC683001  | 683001 | 1,29 | down |
| 5979242 | 7258546 | 1519011 | similar to Transmembrane protein 16B                                             | LOC683001  | 683001 | 1,00 | down |
| 6190855 | 7258546 | 1519005 | similar to Transmembrane protein 16B                                             | LOC683001  | 683001 | 1,20 | down |
| 6256067 | 7258546 | 1518971 | similar to Transmembrane protein 16B                                             | LOC683001  | 683001 | 1,04 | up   |
| 6259724 | 7258546 | 1518952 | similar to Transmembrane protein 16B                                             | LOC683001  | 683001 | 1,22 | up   |
| 6264981 | 7258546 | 1518935 | similar to Transmembrane protein 16B                                             | LOC683001  | 683001 | 1,40 | down |
| 6266804 | 7258546 | 1519002 | similar to Transmembrane protein 16B                                             | LOC683001  | 683001 | 1,36 | down |
| 6276051 | 7258546 | 1519009 | similar to Transmembrane protein 16B                                             | LOC683001  | 683001 | 2,06 | up   |
| 6331919 | 7258546 | 1518945 | similar to Transmembrane protein 16B                                             | LOC683001  | 683001 | 1,11 | up   |
| 6331940 | 7258546 | 1518966 | similar to Transmembrane protein 16B                                             | LOC683001  | 683001 | 1,56 | down |
| 6353992 | 7258546 | 1519004 | similar to Transmembrane protein 16B                                             | LOC683001  | 683001 | 1,05 | up   |
| 6374396 | 7258546 | 1519011 | similar to Transmembrane protein 16B                                             | LOC683001  | 683001 | 1,28 | down |
| 6383372 | 7258546 | 1519011 | similar to Transmembrane protein 16B                                             | LOC683001  | 683001 | 1,06 | down |
| 6410918 | 7258546 | 1518949 | similar to Transmembrane protein 16B                                             | LOC683001  | 683001 | 1,70 | up   |
| 6467423 | 7258546 | 1518986 | similar to Transmembrane protein 16B                                             | LOC683001  | 683001 | 1,77 | down |
| 6488958 | 7258546 | 1518984 | similar to Transmembrane protein 16B                                             | LOC683001  | 683001 | 1,02 | down |
| 6572122 | 7258546 | 1518953 | similar to Transmembrane protein 16B                                             | LOC683001  | 683001 | 1,02 | down |
| 6581510 | 7258546 | 1518954 | similar to Transmembrane protein 16B                                             | LOC683001  | 683001 | 1,06 | down |
| 6643210 | 7258546 | 1518958 | similar to Transmembrane protein 16B                                             | LOC683001  | 683001 | 1,17 | up   |
| 6216368 | 7058713 | 1028672 | similar to Tumor protein p53 inducible protein 5                                 | RGD1560565 | 499287 | 1,03 | up   |
| 6386886 | 7058713 | 1028671 | similar to Tumor protein p53 inducible protein 5                                 | RGD1560565 | 499287 | 1,70 | up   |
| 6477086 | 7058713 | 1028673 | similar to Tumor protein p53 inducible protein 5                                 | RGD1560565 | 499287 | 1,00 | down |
| 5866605 | 7337314 | 1712899 | similar to ubiquitin-associated protein 1                                        | LOC691574  | 691574 | 1,12 | down |
| 6243338 | 7337314 | 1712900 | similar to ubiquitin-associated protein 1                                        | LOC691574  | 691574 | 1,03 | up   |
| 6590338 | 7337314 | 1712898 | similar to ubiquitin-associated protein 1                                        | LOC691574  | 691574 | 1,07 | down |
| 5829452 | 7154655 | 1262309 | similar to UPF0308 protein C9orf21                                               | LOC498685  | 498685 | 1,25 | up   |
| 5975314 | 7154655 | 1262317 | similar to UPF0308 protein C9orf21                                               | LOC498685  | 498685 | 1,50 | up   |
| 6313523 | 7154655 | 1262312 | similar to UPF0308 protein C9orf21                                               | LOC498685  | 498685 | 1,65 | down |
| 6355124 | 7154655 | 1262310 | similar to UPF0308 protein C9orf21                                               | LOC498685  | 498685 | 1,11 | down |
| 6462734 | 7154655 | 1262311 | similar to UPF0308 protein C9orf21                                               | LOC498685  | 498685 | 1,21 | down |
| 5733264 | 7036870 | 977871  | similar to yippee-like 3                                                         | RGD1564579 | 293491 | 1,06 | up   |
| 5858068 | 7036870 | 977872  | similar to yippee-like 3                                                         | RGD1564579 | 293491 | 1,15 | down |
| 6155980 | 7036870 | 977870  | similar to yippee-like 3                                                         | RGD1564579 | 293491 | 1,26 | down |
| 6354878 | 7036870 | 977871  | similar to yippee-like 3                                                         | RGD1564579 | 293491 | 1,05 | down |
| 6596556 | 7036870 | 977872  | similar to yippee-like 3                                                         | RGD1564579 | 293491 | 1,66 | up   |
| 5674502 | 7253453 | 1506155 | similar to Zinc finger and SCAN domain containing protein 2 (Zinc finger protein | RGD1559747 | 312310 | 1,15 | down |
| 5748171 | 7253453 | 1506155 | similar to Zinc finger and SCAN domain containing protein 2 (Zinc finger protein | RGD1559747 | 312310 | 2,27 | down |
| 5992675 | 7253453 | 1506157 | similar to Zinc finger and SCAN domain containing protein 2 (Zinc finger protein | RGD1559747 | 312310 | 1,18 | down |
| 6085550 | 7253453 | 1506151 | similar to Zinc finger and SCAN domain containing protein 2 (Zinc finger protein | RGD1559747 | 312310 | 1,02 | down |
| 6589147 | 7253453 | 1506156 | similar to Zinc finger and SCAN domain containing protein 2 (Zinc finger protein | RGD1559747 | 312310 | 1,11 | down |
| 6626906 | 7253453 | 1506155 | similar to Zinc finger and SCAN domain containing protein 2 (Zinc finger protein | RGD1559747 | 312310 | 1,10 | up   |
| 5664690 | 7302098 | 1627163 | similar to zinc finger protein 238                                               | LOC691556  | 691556 | 1,16 | up   |
| 5816518 | 7302098 | 1627164 | similar to zinc finger protein 238                                               | LOC691556  | 691556 | 1,32 | down |
| 5819864 | 7302098 | 1627163 | similar to zinc finger protein 238                                               | LOC691556  | 691556 | 1,61 | up   |
| 5885369 | 7302098 | 1627161 | similar to zinc finger protein 238                                               | LOC691556  | 691556 | 2,42 | down |
| 5939184 | 7302098 | 1627163 | similar to zinc finger protein 238                                               | LOC691556  | 691556 | 1,16 | up   |
| 6010294 | 7302098 | 1627163 | similar to zinc finger protein 238                                               | LOC691556  | 691556 | 1,47 | down |
| 6044583 | 7302098 | 1627162 | similar to zinc finger protein 238                                               | LOC691556  | 691556 | 1,18 | down |
| 6125504 | 7302098 | 1627163 | similar to zinc finger protein 238                                               | LOC691556  | 691556 | 1,04 | up   |
| 6179185 | 7302098 | 1627163 | similar to zinc finger protein 238                                               | LOC691556  | 691556 | 1,25 | up   |
| 6289995 | 7302098 | 1627163 | similar to zinc finger protein 238                                               | LOC691556  | 691556 | 1,59 | up   |
| 6312744 | 7302098 | 1627163 | similar to zinc finger protein 238                                               | LOC691556  | 691556 | 1,07 | up   |
| 6481198 | 7302098 | 1627163 | similar to zinc finger protein 238                                               | LOC691556  | 691556 | 1,05 | down |

|         |         |         |                                    |            |        |      |      |
|---------|---------|---------|------------------------------------|------------|--------|------|------|
| 6548879 | 7302098 | 1627162 | similar to zinc finger protein 238 | LOC691556  | 691556 | 1,09 | up   |
| 5621346 | 7228520 | 1443743 | similar to zinc finger protein 650 | RGD1565257 | 311115 | 1,39 | up   |
| 5626692 | 7228520 | 1443753 | similar to zinc finger protein 650 | RGD1565257 | 311115 | 1,51 | up   |
| 5711872 | 7228520 | 1443763 | similar to zinc finger protein 650 | RGD1565257 | 311115 | 1,60 | down |
| 5837746 | 7228520 | 1443760 | similar to zinc finger protein 650 | RGD1565257 | 311115 | 1,26 | up   |
| 5839274 | 7228520 | 1443767 | similar to zinc finger protein 650 | RGD1565257 | 311115 | 1,41 | down |
| 5842706 | 7228520 | 1443748 | similar to zinc finger protein 650 | RGD1565257 | 311115 | 1,20 | up   |
| 5926083 | 7228520 | 1443765 | similar to zinc finger protein 650 | RGD1565257 | 311115 | 1,66 | down |
| 5941058 | 7228520 | 1443769 | similar to zinc finger protein 650 | RGD1565257 | 311115 | 1,36 | down |
| 6087815 | 7228520 | 1443747 | similar to zinc finger protein 650 | RGD1565257 | 311115 | 1,29 | up   |
| 6122642 | 7228520 | 1443761 | similar to zinc finger protein 650 | RGD1565257 | 311115 | 1,16 | down |
| 6133001 | 7228520 | 1443766 | similar to zinc finger protein 650 | RGD1565257 | 311115 | 1,64 | down |
| 6156621 | 7228520 | 1443750 | similar to zinc finger protein 650 | RGD1565257 | 311115 | 1,71 | up   |
| 6157650 | 7228520 | 1443762 | similar to zinc finger protein 650 | RGD1565257 | 311115 | 1,86 | down |
| 6197245 | 7228520 | 1443752 | similar to zinc finger protein 650 | RGD1565257 | 311115 | 1,28 | up   |
| 6202993 | 7228520 | 1443764 | similar to zinc finger protein 650 | RGD1565257 | 311115 | 1,80 | down |
| 6261369 | 7228520 | 1443747 | similar to zinc finger protein 650 | RGD1565257 | 311115 | 1,20 | up   |
| 6295115 | 7228520 | 1443755 | similar to zinc finger protein 650 | RGD1565257 | 311115 | 2,05 | up   |
| 6384381 | 7228520 | 1443766 | similar to zinc finger protein 650 | RGD1565257 | 311115 | 1,83 | down |
| 6502579 | 7228520 | 1443754 | similar to zinc finger protein 650 | RGD1565257 | 311115 | 1,64 | up   |
| 6535099 | 7228520 | 1443748 | similar to zinc finger protein 650 | RGD1565257 | 311115 | 1,55 | up   |
| 6559348 | 7228520 | 1443751 | similar to zinc finger protein 650 | RGD1565257 | 311115 | 1,17 | up   |
| 6583979 | 7228520 | 1443768 | similar to zinc finger protein 650 | RGD1565257 | 311115 | 1,61 | down |
| 6598334 | 7228520 | 1443749 | similar to zinc finger protein 650 | RGD1565257 | 311115 | 1,39 | up   |
| 5624651 | 7333333 | 1703393 | similar to zinc finger protein 75  | RGD1565419 | 500950 | 1,11 | down |
| 5772260 | 7333333 | 1703388 | similar to zinc finger protein 75  | RGD1565419 | 500950 | 1,16 | down |
| 5828470 | 7333333 | 1703390 | similar to zinc finger protein 75  | RGD1565419 | 500950 | 1,16 | down |
| 5859354 | 7333333 | 1703403 | similar to zinc finger protein 75  | RGD1565419 | 500950 | 1,14 | down |
| 5865614 | 7333333 | 1703399 | similar to zinc finger protein 75  | RGD1565419 | 500950 | 1,18 | up   |
| 5960413 | 7333333 | 1703403 | similar to zinc finger protein 75  | RGD1565419 | 500950 | 1,81 | down |
| 5999400 | 7333333 | 1703403 | similar to zinc finger protein 75  | RGD1565419 | 500950 | 1,34 | up   |
| 6038419 | 7333333 | 1703400 | similar to zinc finger protein 75  | RGD1565419 | 500950 | 1,12 | up   |
| 6155843 | 7333333 | 1703403 | similar to zinc finger protein 75  | RGD1565419 | 500950 | 1,25 | up   |
| 6162467 | 7333333 | 1703403 | similar to zinc finger protein 75  | RGD1565419 | 500950 | 1,01 | up   |
| 6254452 | 7333333 | 1703401 | similar to zinc finger protein 75  | RGD1565419 | 500950 | 1,24 | up   |
| 6288753 | 7333333 | 1703400 | similar to zinc finger protein 75  | RGD1565419 | 500950 | 1,04 | down |
| 6312043 | 7333333 | 1703397 | similar to zinc finger protein 75  | RGD1565419 | 500950 | 1,17 | up   |
| 6334003 | 7333333 | 1703403 | similar to zinc finger protein 75  | RGD1565419 | 500950 | 1,04 | up   |
| 6414093 | 7333333 | 1703391 | similar to zinc finger protein 75  | RGD1565419 | 500950 | 1,05 | down |
| 6689049 | 7333333 | 1703398 | similar to zinc finger protein 75  | RGD1565419 | 500950 | 1,07 | down |
| 5800849 | 7168858 | 1296849 | Sin3A associated protein           | Sap130     | 307527 | 1,81 | down |
| 5864748 | 7168858 | 1296849 | Sin3A associated protein           | Sap130     | 307527 | 1,61 | up   |
| 6004641 | 7168858 | 1296849 | Sin3A associated protein           | Sap130     | 307527 | 1,10 | up   |
| 6514809 | 7168858 | 1296849 | Sin3A associated protein           | Sap130     | 307527 | 1,26 | up   |
| 6741405 | 7168858 | 1296849 | Sin3A associated protein           | Sap130     | 307527 | 1,48 | down |
| 5701797 | 7029386 | 959412  | SIX homeobox 5                     | Six5       | 308406 | 1,14 | down |
| 5786113 | 7029386 | 959413  | SIX homeobox 5                     | Six5       | 308406 | 1,06 | up   |
| 5847698 | 7029386 | 959413  | SIX homeobox 5                     | Six5       | 308406 | 1,15 | down |
| 5916772 | 7029386 | 959410  | SIX homeobox 5                     | Six5       | 308406 | 1,28 | down |
| 6181296 | 7029386 | 959412  | SIX homeobox 5                     | Six5       | 308406 | 1,39 | up   |
| 6206805 | 7029386 | 959411  | SIX homeobox 5                     | Six5       | 308406 | 1,07 | up   |
| 6213342 | 7029386 | 959411  | SIX homeobox 5                     | Six5       | 308406 | 1,25 | up   |
| 6298846 | 7029386 | 959412  | SIX homeobox 5                     | Six5       | 308406 | 1,04 | down |
| 6308751 | 7029386 | 959410  | SIX homeobox 5                     | Six5       | 308406 | 1,65 | down |
| 6696124 | 7029386 | 959413  | SIX homeobox 5                     | Six5       | 308406 | 1,25 | down |
| 6696619 | 7029386 | 959410  | SIX homeobox 5                     | Six5       | 308406 | 2,46 | down |

|         |         |         |                                   |         |        |      |      |
|---------|---------|---------|-----------------------------------|---------|--------|------|------|
| 6016928 | 7307721 | 1642013 | Six6 opposite strand transcript 1 | Six6os1 | 500673 | 1,15 | down |
| 6584825 | 7307721 | 1642012 | Six6 opposite strand transcript 1 | Six6os1 | 500673 | 1,02 | down |
| 5884099 | 7228467 | 1443666 | Sjogren syndrome antigen B        | Ssb     | 81783  | 1,04 | up   |
| 5953507 | 7228467 | 1443672 | Sjogren syndrome antigen B        | Ssb     | 81783  | 1,13 | down |
| 6015082 | 7228467 | 1443675 | Sjogren syndrome antigen B        | Ssb     | 81783  | 1,26 | down |
| 6092798 | 7228467 | 1443674 | Sjogren syndrome antigen B        | Ssb     | 81783  | 1,35 | down |
| 6182776 | 7228467 | 1443665 | Sjogren syndrome antigen B        | Ssb     | 81783  | 1,22 | up   |
| 6306721 | 7228467 | 1443669 | Sjogren syndrome antigen B        | Ssb     | 81783  | 1,10 | down |
| 6337630 | 7228467 | 1443668 | Sjogren syndrome antigen B        | Ssb     | 81783  | 2,42 | down |
| 6406620 | 7228467 | 1443670 | Sjogren syndrome antigen B        | Ssb     | 81783  | 1,48 | up   |
| 6453940 | 7228467 | 1443673 | Sjogren syndrome antigen B        | Ssb     | 81783  | 1,49 | down |
| 6507290 | 7228467 | 1443667 | Sjogren syndrome antigen B        | Ssb     | 81783  | 1,13 | up   |
| 6546297 | 7228467 | 1443674 | Sjogren syndrome antigen B        | Ssb     | 81783  | 2,00 | up   |
| 6616386 | 7228467 | 1443671 | Sjogren syndrome antigen B        | Ssb     | 81783  | 1,03 | down |
| 6622159 | 7228467 | 1443675 | Sjogren syndrome antigen B        | Ssb     | 81783  | 1,37 | up   |
| 6727814 | 7228467 | 1443665 | Sjogren syndrome antigen B        | Ssb     | 81783  | 1,18 | up   |
| 6562374 | 7114108 | 1162448 | SLAM family member 7              | Slamf7  | 364049 | 1,03 | up   |
| 5647063 | 7059502 | 1030378 | slingshot homolog 3 (Drosophila)  | Ssh3    | 365396 | 1,00 | up   |
| 5702845 | 7059502 | 1030371 | slingshot homolog 3 (Drosophila)  | Ssh3    | 365396 | 1,03 | up   |
| 5781071 | 7059502 | 1030383 | slingshot homolog 3 (Drosophila)  | Ssh3    | 365396 | 1,00 | up   |
| 5785855 | 7059502 | 1030384 | slingshot homolog 3 (Drosophila)  | Ssh3    | 365396 | 2,04 | up   |
| 5804286 | 7059502 | 1030376 | slingshot homolog 3 (Drosophila)  | Ssh3    | 365396 | 1,08 | up   |
| 5949796 | 7059502 | 1030375 | slingshot homolog 3 (Drosophila)  | Ssh3    | 365396 | 1,12 | up   |
| 6047011 | 7059502 | 1030372 | slingshot homolog 3 (Drosophila)  | Ssh3    | 365396 | 1,31 | down |
| 6058176 | 7059502 | 1030370 | slingshot homolog 3 (Drosophila)  | Ssh3    | 365396 | 1,06 | down |
| 6069627 | 7059502 | 1030371 | slingshot homolog 3 (Drosophila)  | Ssh3    | 365396 | 1,19 | up   |
| 6096943 | 7059502 | 1030369 | slingshot homolog 3 (Drosophila)  | Ssh3    | 365396 | 1,01 | down |
| 6101365 | 7059502 | 1030377 | slingshot homolog 3 (Drosophila)  | Ssh3    | 365396 | 1,29 | down |
| 6208224 | 7059502 | 1030370 | slingshot homolog 3 (Drosophila)  | Ssh3    | 365396 | 1,19 | down |
| 6290650 | 7059502 | 1030373 | slingshot homolog 3 (Drosophila)  | Ssh3    | 365396 | 1,11 | up   |
| 6484595 | 7059502 | 1030380 | slingshot homolog 3 (Drosophila)  | Ssh3    | 365396 | 2,05 | down |
| 6526024 | 7059502 | 1030382 | slingshot homolog 3 (Drosophila)  | Ssh3    | 365396 | 1,27 | down |
| 6619783 | 7059502 | 1030370 | slingshot homolog 3 (Drosophila)  | Ssh3    | 365396 | 1,08 | up   |
| 6651415 | 7059502 | 1030374 | slingshot homolog 3 (Drosophila)  | Ssh3    | 365396 | 1,07 | down |
| 6681435 | 7059502 | 1030379 | slingshot homolog 3 (Drosophila)  | Ssh3    | 365396 | 1,21 | down |
| 5621481 | 7062628 | 1038081 | slit homolog 1 (Drosophila)       | Slit1   | 65047  | 1,06 | up   |
| 5625302 | 7062628 | 1038109 | slit homolog 1 (Drosophila)       | Slit1   | 65047  | 1,04 | up   |
| 5638152 | 7062628 | 1038097 | slit homolog 1 (Drosophila)       | Slit1   | 65047  | 1,47 | up   |
| 5653068 | 7062628 | 1038081 | slit homolog 1 (Drosophila)       | Slit1   | 65047  | 1,66 | up   |
| 5656728 | 7062628 | 1038080 | slit homolog 1 (Drosophila)       | Slit1   | 65047  | 1,32 | up   |
| 5685253 | 7062628 | 1038086 | slit homolog 1 (Drosophila)       | Slit1   | 65047  | 1,66 | up   |
| 5727905 | 7062628 | 1038087 | slit homolog 1 (Drosophila)       | Slit1   | 65047  | 1,03 | up   |
| 5764765 | 7062628 | 1038088 | slit homolog 1 (Drosophila)       | Slit1   | 65047  | 1,13 | up   |
| 5777527 | 7062628 | 1038107 | slit homolog 1 (Drosophila)       | Slit1   | 65047  | 1,26 | down |
| 5796880 | 7062628 | 1038085 | slit homolog 1 (Drosophila)       | Slit1   | 65047  | 1,18 | up   |
| 5807274 | 7062628 | 1038098 | slit homolog 1 (Drosophila)       | Slit1   | 65047  | 1,40 | down |
| 5839232 | 7062628 | 1038092 | slit homolog 1 (Drosophila)       | Slit1   | 65047  | 1,21 | up   |
| 5932574 | 7062628 | 1038106 | slit homolog 1 (Drosophila)       | Slit1   | 65047  | 1,81 | down |
| 5937518 | 7062628 | 1038090 | slit homolog 1 (Drosophila)       | Slit1   | 65047  | 1,24 | down |
| 5937549 | 7062628 | 1038089 | slit homolog 1 (Drosophila)       | Slit1   | 65047  | 1,61 | up   |
| 5941958 | 7062628 | 1038085 | slit homolog 1 (Drosophila)       | Slit1   | 65047  | 1,13 | down |
| 6061998 | 7062628 | 1038099 | slit homolog 1 (Drosophila)       | Slit1   | 65047  | 1,02 | down |
| 6129985 | 7062628 | 1038093 | slit homolog 1 (Drosophila)       | Slit1   | 65047  | 1,04 | down |
| 6162870 | 7062628 | 1038084 | slit homolog 1 (Drosophila)       | Slit1   | 65047  | 1,06 | down |
| 6302731 | 7062628 | 1038105 | slit homolog 1 (Drosophila)       | Slit1   | 65047  | 1,62 | down |
| 6306693 | 7062628 | 1038110 | slit homolog 1 (Drosophila)       | Slit1   | 65047  | 1,56 | down |

|         |         |         |                                                    |        |        |      |      |
|---------|---------|---------|----------------------------------------------------|--------|--------|------|------|
| 6321697 | 7062628 | 1038103 | slit homolog 1 (Drosophila)                        | Slit1  | 65047  | 1,32 | down |
| 6333878 | 7062628 | 1038083 | slit homolog 1 (Drosophila)                        | Slit1  | 65047  | 1,03 | down |
| 6413193 | 7062628 | 1038111 | slit homolog 1 (Drosophila)                        | Slit1  | 65047  | 1,98 | up   |
| 6428077 | 7062628 | 1038101 | slit homolog 1 (Drosophila)                        | Slit1  | 65047  | 1,13 | down |
| 6462561 | 7062628 | 1038108 | slit homolog 1 (Drosophila)                        | Slit1  | 65047  | 1,13 | up   |
| 6485781 | 7062628 | 1038091 | slit homolog 1 (Drosophila)                        | Slit1  | 65047  | 1,08 | up   |
| 6507017 | 7062628 | 1038094 | slit homolog 1 (Drosophila)                        | Slit1  | 65047  | 1,11 | up   |
| 6551096 | 7062628 | 1038080 | slit homolog 1 (Drosophila)                        | Slit1  | 65047  | 1,48 | up   |
| 6577349 | 7062628 | 1038079 | slit homolog 1 (Drosophila)                        | Slit1  | 65047  | 2,04 | up   |
| 6581993 | 7062628 | 1038104 | slit homolog 1 (Drosophila)                        | Slit1  | 65047  | 1,62 | down |
| 6599994 | 7062628 | 1038102 | slit homolog 1 (Drosophila)                        | Slit1  | 65047  | 1,28 | down |
| 6612543 | 7062628 | 1038096 | slit homolog 1 (Drosophila)                        | Slit1  | 65047  | 1,12 | down |
| 6654266 | 7062628 | 1038082 | slit homolog 1 (Drosophila)                        | Slit1  | 65047  | 1,72 | down |
| 6660296 | 7062628 | 1038112 | slit homolog 1 (Drosophila)                        | Slit1  | 65047  | 1,07 | up   |
| 6674373 | 7062628 | 1038095 | slit homolog 1 (Drosophila)                        | Slit1  | 65047  | 1,48 | up   |
| 6675367 | 7062628 | 1038107 | slit homolog 1 (Drosophila)                        | Slit1  | 65047  | 1,26 | down |
| 6682386 | 7062628 | 1038100 | slit homolog 1 (Drosophila)                        | Slit1  | 65047  | 1,65 | down |
| 6691778 | 7062628 | 1038080 | slit homolog 1 (Drosophila)                        | Slit1  | 65047  | 1,80 | up   |
| 5684272 | 7172144 | 1305045 | SMAD family member 7                               | Smad7  | 81516  | 1,34 | up   |
| 5703443 | 7172144 | 1305043 | SMAD family member 7                               | Smad7  | 81516  | 1,35 | up   |
| 5802350 | 7172144 | 1305043 | SMAD family member 7                               | Smad7  | 81516  | 1,04 | up   |
| 6051275 | 7172144 | 1305043 | SMAD family member 7                               | Smad7  | 81516  | 1,14 | down |
| 6070373 | 7172144 | 1305044 | SMAD family member 7                               | Smad7  | 81516  | 2,93 | down |
| 6124035 | 7172144 | 1305047 | SMAD family member 7                               | Smad7  | 81516  | 1,29 | up   |
| 6171589 | 7172144 | 1305043 | SMAD family member 7                               | Smad7  | 81516  | 1,10 | down |
| 6242631 | 7172144 | 1305043 | SMAD family member 7                               | Smad7  | 81516  | 1,13 | down |
| 6352200 | 7172144 | 1305042 | SMAD family member 7                               | Smad7  | 81516  | 1,40 | up   |
| 6444695 | 7172144 | 1305043 | SMAD family member 7                               | Smad7  | 81516  | 1,00 | up   |
| 6482456 | 7172144 | 1305043 | SMAD family member 7                               | Smad7  | 81516  | 1,16 | up   |
| 6507297 | 7172144 | 1305046 | SMAD family member 7                               | Smad7  | 81516  | 1,09 | up   |
| 6673274 | 7172144 | 1305042 | SMAD family member 7                               | Smad7  | 81516  | 1,17 | down |
| 6681516 | 7172144 | 1305044 | SMAD family member 7                               | Smad7  | 81516  | 1,12 | down |
| 5940372 | 7194141 | 1361090 | SMAD family member 9                               | Smad9  | 85435  | 2,31 | down |
| 6189848 | 7194141 | 1361091 | SMAD family member 9                               | Smad9  | 85435  | 1,24 | down |
| 6249304 | 7194141 | 1361093 | SMAD family member 9                               | Smad9  | 85435  | 1,53 | up   |
| 6285854 | 7194141 | 1361089 | SMAD family member 9                               | Smad9  | 85435  | 1,81 | down |
| 6443452 | 7194141 | 1361089 | SMAD family member 9                               | Smad9  | 85435  | 1,61 | up   |
| 6450812 | 7194141 | 1361093 | SMAD family member 9                               | Smad9  | 85435  | 1,51 | up   |
| 6588958 | 7194141 | 1361092 | SMAD family member 9                               | Smad9  | 85435  | 1,09 | down |
| 6138673 | 7167819 | 1293858 | small nuclear ribonucleoprotein D1                 | Snrpd1 | 291794 | 1,35 | up   |
| 6162773 | 7167819 | 1293854 | small nuclear ribonucleoprotein D1                 | Snrpd1 | 291794 | 1,00 | down |
| 6244541 | 7167819 | 1293856 | small nuclear ribonucleoprotein D1                 | Snrpd1 | 291794 | 2,21 | down |
| 6519588 | 7167819 | 1293858 | small nuclear ribonucleoprotein D1                 | Snrpd1 | 291794 | 1,23 | down |
| 6665122 | 7167819 | 1293855 | small nuclear ribonucleoprotein D1                 | Snrpd1 | 291794 | 1,21 | up   |
| 5634824 | 7233298 | 1456281 | small nuclear ribonucleoprotein polypeptide B"     | Snrpb2 | 362223 | 1,09 | down |
| 5932457 | 7233298 | 1456277 | small nuclear ribonucleoprotein polypeptide B"     | Snrpb2 | 362223 | 3,81 | up   |
| 6372165 | 7233298 | 1456276 | small nuclear ribonucleoprotein polypeptide B"     | Snrpb2 | 362223 | 1,21 | up   |
| 6467249 | 7233298 | 1456280 | small nuclear ribonucleoprotein polypeptide B"     | Snrpb2 | 362223 | 1,46 | down |
| 6489074 | 7233298 | 1456281 | small nuclear ribonucleoprotein polypeptide B"     | Snrpb2 | 362223 | 1,67 | down |
| 6562615 | 7233298 | 1456275 | small nuclear ribonucleoprotein polypeptide B"     | Snrpb2 | 362223 | 1,28 | up   |
| 6609158 | 7233298 | 1456278 | small nuclear ribonucleoprotein polypeptide B"     | Snrpb2 | 362223 | 1,76 | up   |
| 5702698 | 7122131 | 1182673 | SMEK homolog 2, suppressor of mek1 (Dictyostelium) | Smek2  | 360993 | 1,25 | up   |
| 5739867 | 7122131 | 1182676 | SMEK homolog 2, suppressor of mek1 (Dictyostelium) | Smek2  | 360993 | 1,37 | down |
| 5779830 | 7122131 | 1182667 | SMEK homolog 2, suppressor of mek1 (Dictyostelium) | Smek2  | 360993 | 1,23 | up   |
| 5802188 | 7122131 | 1182678 | SMEK homolog 2, suppressor of mek1 (Dictyostelium) | Smek2  | 360993 | 1,20 | down |
| 5902907 | 7122131 | 1182679 | SMEK homolog 2, suppressor of mek1 (Dictyostelium) | Smek2  | 360993 | 1,06 | up   |

|         |         |         |                                                    |        |        |      |      |
|---------|---------|---------|----------------------------------------------------|--------|--------|------|------|
| 5912628 | 7122131 | 1182685 | SMEK homolog 2, suppressor of mek1 (Dictyostelium) | Smek2  | 360993 | 1,32 | down |
| 5982224 | 7122131 | 1182681 | SMEK homolog 2, suppressor of mek1 (Dictyostelium) | Smek2  | 360993 | 1,05 | up   |
| 6083665 | 7122131 | 1182686 | SMEK homolog 2, suppressor of mek1 (Dictyostelium) | Smek2  | 360993 | 1,09 | down |
| 6156479 | 7122131 | 1182683 | SMEK homolog 2, suppressor of mek1 (Dictyostelium) | Smek2  | 360993 | 1,18 | down |
| 6158605 | 7122131 | 1182667 | SMEK homolog 2, suppressor of mek1 (Dictyostelium) | Smek2  | 360993 | 1,99 | down |
| 6252717 | 7122131 | 1182674 | SMEK homolog 2, suppressor of mek1 (Dictyostelium) | Smek2  | 360993 | 1,15 | down |
| 6379073 | 7122131 | 1182688 | SMEK homolog 2, suppressor of mek1 (Dictyostelium) | Smek2  | 360993 | 1,14 | up   |
| 6454831 | 7122131 | 1182687 | SMEK homolog 2, suppressor of mek1 (Dictyostelium) | Smek2  | 360993 | 1,21 | up   |
| 6472746 | 7122131 | 1182682 | SMEK homolog 2, suppressor of mek1 (Dictyostelium) | Smek2  | 360993 | 1,04 | down |
| 6493431 | 7122131 | 1182677 | SMEK homolog 2, suppressor of mek1 (Dictyostelium) | Smek2  | 360993 | 1,12 | down |
| 6500070 | 7122131 | 1182688 | SMEK homolog 2, suppressor of mek1 (Dictyostelium) | Smek2  | 360993 | 1,12 | up   |
| 6588466 | 7122131 | 1182675 | SMEK homolog 2, suppressor of mek1 (Dictyostelium) | Smek2  | 360993 | 1,09 | down |
| 6356048 | 7079600 | 1078625 | smoothelin-like 2                                  | Smtnl2 | 679629 | 1,15 | up   |
| 5623233 | 7082122 | 1084168 | SNAP25-interacting protein                         | Snip   | 56029  | 1,11 | up   |
| 5749658 | 7082122 | 1084176 | SNAP25-interacting protein                         | Snip   | 56029  | 1,03 | down |
| 5795088 | 7082122 | 1084163 | SNAP25-interacting protein                         | Snip   | 56029  | 1,27 | down |
| 5918349 | 7082122 | 1084173 | SNAP25-interacting protein                         | Snip   | 56029  | 1,08 | up   |
| 5933078 | 7082122 | 1084171 | SNAP25-interacting protein                         | Snip   | 56029  | 1,24 | up   |
| 6006368 | 7082122 | 1084174 | SNAP25-interacting protein                         | Snip   | 56029  | 1,30 | down |
| 6082862 | 7082122 | 1084170 | SNAP25-interacting protein                         | Snip   | 56029  | 1,05 | up   |
| 6125116 | 7082122 | 1084175 | SNAP25-interacting protein                         | Snip   | 56029  | 1,61 | down |
| 6155680 | 7082122 | 1084167 | SNAP25-interacting protein                         | Snip   | 56029  | 1,02 | down |
| 6156770 | 7082122 | 1084163 | SNAP25-interacting protein                         | Snip   | 56029  | 2,39 | up   |
| 6196571 | 7082122 | 1084166 | SNAP25-interacting protein                         | Snip   | 56029  | 1,16 | down |
| 6197011 | 7082122 | 1084164 | SNAP25-interacting protein                         | Snip   | 56029  | 1,03 | down |
| 6231047 | 7082122 | 1084171 | SNAP25-interacting protein                         | Snip   | 56029  | 1,14 | down |
| 6244804 | 7082122 | 1084177 | SNAP25-interacting protein                         | Snip   | 56029  | 1,04 | down |
| 6348496 | 7082122 | 1084179 | SNAP25-interacting protein                         | Snip   | 56029  | 1,18 | down |
| 6464169 | 7082122 | 1084169 | SNAP25-interacting protein                         | Snip   | 56029  | 1,01 | down |
| 6477755 | 7082122 | 1084163 | SNAP25-interacting protein                         | Snip   | 56029  | 1,04 | up   |
| 6483938 | 7082122 | 1084178 | SNAP25-interacting protein                         | Snip   | 56029  | 1,03 | down |
| 6522656 | 7082122 | 1084165 | SNAP25-interacting protein                         | Snip   | 56029  | 1,00 | down |
| 6609839 | 7082122 | 1084166 | SNAP25-interacting protein                         | Snip   | 56029  | 1,03 | down |
| 6670446 | 7082122 | 1084163 | SNAP25-interacting protein                         | Snip   | 56029  | 1,10 | up   |
| 6688716 | 7082122 | 1084172 | SNAP25-interacting protein                         | Snip   | 56029  | 1,09 | down |
| 5761220 | 7208027 | 1394483 | sodium channel and clathrin linker 1               | Sclt1  | 266809 | 1,09 | up   |
| 5826089 | 7208027 | 1394471 | sodium channel and clathrin linker 1               | Sclt1  | 266809 | 1,36 | down |
| 5842416 | 7208027 | 1394484 | sodium channel and clathrin linker 1               | Sclt1  | 266809 | 1,31 | up   |
| 5912934 | 7208027 | 1394479 | sodium channel and clathrin linker 1               | Sclt1  | 266809 | 1,83 | up   |
| 5921550 | 7208027 | 1394473 | sodium channel and clathrin linker 1               | Sclt1  | 266809 | 1,19 | down |
| 5958283 | 7208027 | 1394475 | sodium channel and clathrin linker 1               | Sclt1  | 266809 | 1,36 | down |
| 6029152 | 7208027 | 1394481 | sodium channel and clathrin linker 1               | Sclt1  | 266809 | 1,59 | down |
| 6101782 | 7208027 | 1394471 | sodium channel and clathrin linker 1               | Sclt1  | 266809 | 2,69 | down |
| 6157329 | 7208027 | 1394482 | sodium channel and clathrin linker 1               | Sclt1  | 266809 | 1,02 | down |
| 6231560 | 7208027 | 1394472 | sodium channel and clathrin linker 1               | Sclt1  | 266809 | 1,40 | down |
| 6273180 | 7208027 | 1394478 | sodium channel and clathrin linker 1               | Sclt1  | 266809 | 1,02 | up   |
| 6298765 | 7208027 | 1394487 | sodium channel and clathrin linker 1               | Sclt1  | 266809 | 1,45 | down |
| 6304608 | 7208027 | 1394476 | sodium channel and clathrin linker 1               | Sclt1  | 266809 | 1,07 | down |
| 6421685 | 7208027 | 1394477 | sodium channel and clathrin linker 1               | Sclt1  | 266809 | 1,15 | up   |
| 6425278 | 7208027 | 1394488 | sodium channel and clathrin linker 1               | Sclt1  | 266809 | 1,14 | down |
| 6479149 | 7208027 | 1394474 | sodium channel and clathrin linker 1               | Sclt1  | 266809 | 1,16 | up   |
| 6535672 | 7208027 | 1394485 | sodium channel and clathrin linker 1               | Sclt1  | 266809 | 1,15 | up   |
| 6583438 | 7208027 | 1394489 | sodium channel and clathrin linker 1               | Sclt1  | 266809 | 1,04 | up   |
| 6636390 | 7208027 | 1394486 | sodium channel and clathrin linker 1               | Sclt1  | 266809 | 1,16 | down |
| 6680672 | 7208027 | 1394480 | sodium channel and clathrin linker 1               | Sclt1  | 266809 | 1,87 | up   |
| 6708180 | 7208027 | 1394490 | sodium channel and clathrin linker 1               | Sclt1  | 266809 | 1,05 | up   |

|         |         |         |                                                      |        |        |      |      |
|---------|---------|---------|------------------------------------------------------|--------|--------|------|------|
| 6731771 | 7208027 | 1394470 | sodium channel and clathrin linker 1                 | Sc1t1  | 266809 | 1,13 | down |
| 5640803 | 7258507 | 1518827 | sodium channel, nonvoltage-gated, type I, alpha      | Scnn1a | 25122  | 1,15 | up   |
| 5719047 | 7258507 | 1518831 | sodium channel, nonvoltage-gated, type I, alpha      | Scnn1a | 25122  | 1,41 | down |
| 5726151 | 7258507 | 1518824 | sodium channel, nonvoltage-gated, type I, alpha      | Scnn1a | 25122  | 1,28 | up   |
| 5736687 | 7258507 | 1518833 | sodium channel, nonvoltage-gated, type I, alpha      | Scnn1a | 25122  | 1,33 | up   |
| 5778882 | 7258507 | 1518832 | sodium channel, nonvoltage-gated, type I, alpha      | Scnn1a | 25122  | 1,00 | down |
| 5858992 | 7258507 | 1518836 | sodium channel, nonvoltage-gated, type I, alpha      | Scnn1a | 25122  | 1,24 | up   |
| 5947997 | 7258507 | 1518836 | sodium channel, nonvoltage-gated, type I, alpha      | Scnn1a | 25122  | 1,06 | up   |
| 6029090 | 7258507 | 1518835 | sodium channel, nonvoltage-gated, type I, alpha      | Scnn1a | 25122  | 1,02 | down |
| 6166453 | 7258507 | 1518829 | sodium channel, nonvoltage-gated, type I, alpha      | Scnn1a | 25122  | 1,29 | up   |
| 6208057 | 7258507 | 1518836 | sodium channel, nonvoltage-gated, type I, alpha      | Scnn1a | 25122  | 2,01 | down |
| 6234824 | 7258507 | 1518830 | sodium channel, nonvoltage-gated, type I, alpha      | Scnn1a | 25122  | 1,10 | down |
| 6373409 | 7258507 | 1518828 | sodium channel, nonvoltage-gated, type I, alpha      | Scnn1a | 25122  | 1,21 | up   |
| 6422303 | 7258507 | 1518826 | sodium channel, nonvoltage-gated, type I, alpha      | Scnn1a | 25122  | 1,03 | up   |
| 6501368 | 7258507 | 1518837 | sodium channel, nonvoltage-gated, type I, alpha      | Scnn1a | 25122  | 1,07 | up   |
| 6627990 | 7258507 | 1518834 | sodium channel, nonvoltage-gated, type I, alpha      | Scnn1a | 25122  | 1,04 | down |
| 6643789 | 7258507 | 1518836 | sodium channel, nonvoltage-gated, type I, alpha      | Scnn1a | 25122  | 1,12 | up   |
| 6697447 | 7258507 | 1518836 | sodium channel, nonvoltage-gated, type I, alpha      | Scnn1a | 25122  | 1,06 | up   |
| 6716934 | 7258507 | 1518825 | sodium channel, nonvoltage-gated, type I, alpha      | Scnn1a | 25122  | 1,05 | up   |
| 6732452 | 7258507 | 1518823 | sodium channel, nonvoltage-gated, type I, alpha      | Scnn1a | 25122  | 1,16 | up   |
| 5651835 | 7320850 | 1674419 | sodium channel, voltage-gated, type 8, alpha subunit | Scn8a  | 29710  | 1,61 | up   |
| 5745852 | 7320850 | 1674416 | sodium channel, voltage-gated, type 8, alpha subunit | Scn8a  | 29710  | 1,29 | down |
| 5792857 | 7320850 | 1674405 | sodium channel, voltage-gated, type 8, alpha subunit | Scn8a  | 29710  | 1,20 | up   |
| 5820998 | 7320850 | 1674419 | sodium channel, voltage-gated, type 8, alpha subunit | Scn8a  | 29710  | 1,61 | down |
| 5825755 | 7320850 | 1674412 | sodium channel, voltage-gated, type 8, alpha subunit | Scn8a  | 29710  | 1,02 | down |
| 5837293 | 7320850 | 1674410 | sodium channel, voltage-gated, type 8, alpha subunit | Scn8a  | 29710  | 1,50 | up   |
| 5915914 | 7320850 | 1674399 | sodium channel, voltage-gated, type 8, alpha subunit | Scn8a  | 29710  | 1,39 | up   |
| 5940416 | 7320850 | 1674408 | sodium channel, voltage-gated, type 8, alpha subunit | Scn8a  | 29710  | 1,55 | down |
| 5958645 | 7320850 | 1674418 | sodium channel, voltage-gated, type 8, alpha subunit | Scn8a  | 29710  | 1,02 | up   |
| 5960248 | 7320850 | 1674392 | sodium channel, voltage-gated, type 8, alpha subunit | Scn8a  | 29710  | 1,11 | up   |
| 6024274 | 7320850 | 1674395 | sodium channel, voltage-gated, type 8, alpha subunit | Scn8a  | 29710  | 1,15 | up   |
| 6051592 | 7320850 | 1674413 | sodium channel, voltage-gated, type 8, alpha subunit | Scn8a  | 29710  | 1,51 | up   |
| 6062548 | 7320850 | 1674409 | sodium channel, voltage-gated, type 8, alpha subunit | Scn8a  | 29710  | 1,26 | up   |
| 6089383 | 7320850 | 1674407 | sodium channel, voltage-gated, type 8, alpha subunit | Scn8a  | 29710  | 1,22 | up   |
| 6169362 | 7320850 | 1674408 | sodium channel, voltage-gated, type 8, alpha subunit | Scn8a  | 29710  | 1,07 | up   |
| 6265290 | 7320850 | 1674402 | sodium channel, voltage-gated, type 8, alpha subunit | Scn8a  | 29710  | 1,84 | down |
| 6415427 | 7320850 | 1674411 | sodium channel, voltage-gated, type 8, alpha subunit | Scn8a  | 29710  | 2,17 | down |
| 6472163 | 7320850 | 1674419 | sodium channel, voltage-gated, type 8, alpha subunit | Scn8a  | 29710  | 1,20 | down |
| 6486047 | 7320850 | 1674398 | sodium channel, voltage-gated, type 8, alpha subunit | Scn8a  | 29710  | 1,01 | up   |
| 6504951 | 7320850 | 1674403 | sodium channel, voltage-gated, type 8, alpha subunit | Scn8a  | 29710  | 1,60 | down |
| 6533596 | 7320850 | 1674417 | sodium channel, voltage-gated, type 8, alpha subunit | Scn8a  | 29710  | 1,03 | up   |
| 6555833 | 7320850 | 1674406 | sodium channel, voltage-gated, type 8, alpha subunit | Scn8a  | 29710  | 1,23 | down |
| 6562085 | 7320850 | 1674404 | sodium channel, voltage-gated, type 8, alpha subunit | Scn8a  | 29710  | 1,13 | up   |
| 6565086 | 7320850 | 1674414 | sodium channel, voltage-gated, type 8, alpha subunit | Scn8a  | 29710  | 1,23 | down |
| 6565880 | 7320850 | 1674397 | sodium channel, voltage-gated, type 8, alpha subunit | Scn8a  | 29710  | 1,03 | down |
| 6570454 | 7320850 | 1674400 | sodium channel, voltage-gated, type 8, alpha subunit | Scn8a  | 29710  | 1,27 | down |
| 6573417 | 7320850 | 1674415 | sodium channel, voltage-gated, type 8, alpha subunit | Scn8a  | 29710  | 1,19 | down |
| 6614121 | 7320850 | 1674401 | sodium channel, voltage-gated, type 8, alpha subunit | Scn8a  | 29710  | 1,00 | up   |
| 6626303 | 7320850 | 1674394 | sodium channel, voltage-gated, type 8, alpha subunit | Scn8a  | 29710  | 1,33 | up   |
| 6719842 | 7320850 | 1674393 | sodium channel, voltage-gated, type 8, alpha subunit | Scn8a  | 29710  | 1,45 | down |
| 6735738 | 7320850 | 1674396 | sodium channel, voltage-gated, type 8, alpha subunit | Scn8a  | 29710  | 1,23 | up   |
| 5674200 | 7239774 | 1473301 | sodium channel, voltage-gated, type VII, alpha       | Scn7a  | 64155  | 1,37 | up   |
| 5810756 | 7239774 | 1473311 | sodium channel, voltage-gated, type VII, alpha       | Scn7a  | 64155  | 1,02 | down |
| 5818296 | 7239774 | 1473320 | sodium channel, voltage-gated, type VII, alpha       | Scn7a  | 64155  | 1,06 | down |
| 5847584 | 7239774 | 1473319 | sodium channel, voltage-gated, type VII, alpha       | Scn7a  | 64155  | 1,31 | down |
| 5899113 | 7239774 | 1473317 | sodium channel, voltage-gated, type VII, alpha       | Scn7a  | 64155  | 1,20 | up   |

|         |         |         |                                                      |        |        |      |      |
|---------|---------|---------|------------------------------------------------------|--------|--------|------|------|
| 5899941 | 7239774 | 1473318 | sodium channel, voltage-gated, type VII, alpha       | Scn7a  | 64155  | 1,22 | down |
| 5934625 | 7239774 | 1473310 | sodium channel, voltage-gated, type VII, alpha       | Scn7a  | 64155  | 1,56 | up   |
| 6011802 | 7239774 | 1473317 | sodium channel, voltage-gated, type VII, alpha       | Scn7a  | 64155  | 1,20 | up   |
| 6019808 | 7239774 | 1473322 | sodium channel, voltage-gated, type VII, alpha       | Scn7a  | 64155  | 1,14 | up   |
| 6028500 | 7239774 | 1473297 | sodium channel, voltage-gated, type VII, alpha       | Scn7a  | 64155  | 1,49 | up   |
| 6033055 | 7239774 | 1473308 | sodium channel, voltage-gated, type VII, alpha       | Scn7a  | 64155  | 1,23 | down |
| 6091053 | 7239774 | 1473313 | sodium channel, voltage-gated, type VII, alpha       | Scn7a  | 64155  | 1,36 | up   |
| 6093429 | 7239774 | 1473312 | sodium channel, voltage-gated, type VII, alpha       | Scn7a  | 64155  | 1,29 | down |
| 6138572 | 7239774 | 1473299 | sodium channel, voltage-gated, type VII, alpha       | Scn7a  | 64155  | 1,19 | down |
| 6244319 | 7239774 | 1473311 | sodium channel, voltage-gated, type VII, alpha       | Scn7a  | 64155  | 1,13 | down |
| 6248739 | 7239774 | 1473304 | sodium channel, voltage-gated, type VII, alpha       | Scn7a  | 64155  | 1,07 | down |
| 6252160 | 7239774 | 1473314 | sodium channel, voltage-gated, type VII, alpha       | Scn7a  | 64155  | 1,06 | down |
| 6263953 | 7239774 | 1473305 | sodium channel, voltage-gated, type VII, alpha       | Scn7a  | 64155  | 1,44 | down |
| 6272367 | 7239774 | 1473315 | sodium channel, voltage-gated, type VII, alpha       | Scn7a  | 64155  | 1,07 | down |
| 6287761 | 7239774 | 1473302 | sodium channel, voltage-gated, type VII, alpha       | Scn7a  | 64155  | 1,20 | up   |
| 6328973 | 7239774 | 1473303 | sodium channel, voltage-gated, type VII, alpha       | Scn7a  | 64155  | 1,17 | up   |
| 6357438 | 7239774 | 1473309 | sodium channel, voltage-gated, type VII, alpha       | Scn7a  | 64155  | 1,09 | down |
| 6479684 | 7239774 | 1473307 | sodium channel, voltage-gated, type VII, alpha       | Scn7a  | 64155  | 1,36 | up   |
| 6523562 | 7239774 | 1473298 | sodium channel, voltage-gated, type VII, alpha       | Scn7a  | 64155  | 2,30 | up   |
| 6549745 | 7239774 | 1473306 | sodium channel, voltage-gated, type VII, alpha       | Scn7a  | 64155  | 1,07 | down |
| 6550800 | 7239774 | 1473300 | sodium channel, voltage-gated, type VII, alpha       | Scn7a  | 64155  | 1,02 | down |
| 6556185 | 7239774 | 1473316 | sodium channel, voltage-gated, type VII, alpha       | Scn7a  | 64155  | 1,26 | down |
| 6559857 | 7239774 | 1473321 | sodium channel, voltage-gated, type VII, alpha       | Scn7a  | 64155  | 1,12 | down |
| 6586440 | 7239774 | 1473309 | sodium channel, voltage-gated, type VII, alpha       | Scn7a  | 64155  | 1,17 | down |
| 5656260 | 7350894 | 1747183 | sodium channel, voltage-gated, type X, alpha subunit | Scn10a | 29571  | 1,15 | down |
| 5696873 | 7350894 | 1747183 | sodium channel, voltage-gated, type X, alpha subunit | Scn10a | 29571  | 1,55 | down |
| 5700084 | 7350894 | 1747170 | sodium channel, voltage-gated, type X, alpha subunit | Scn10a | 29571  | 1,02 | down |
| 5758462 | 7350894 | 1747181 | sodium channel, voltage-gated, type X, alpha subunit | Scn10a | 29571  | 1,01 | down |
| 5809739 | 7350894 | 1747189 | sodium channel, voltage-gated, type X, alpha subunit | Scn10a | 29571  | 1,22 | up   |
| 5866359 | 7350894 | 1747182 | sodium channel, voltage-gated, type X, alpha subunit | Scn10a | 29571  | 1,27 | up   |
| 5873677 | 7350894 | 1747166 | sodium channel, voltage-gated, type X, alpha subunit | Scn10a | 29571  | 1,07 | up   |
| 5949101 | 7350894 | 1747174 | sodium channel, voltage-gated, type X, alpha subunit | Scn10a | 29571  | 1,65 | up   |
| 5954590 | 7350894 | 1747171 | sodium channel, voltage-gated, type X, alpha subunit | Scn10a | 29571  | 2,30 | down |
| 5956678 | 7350894 | 1747172 | sodium channel, voltage-gated, type X, alpha subunit | Scn10a | 29571  | 1,01 | down |
| 6077757 | 7350894 | 1747193 | sodium channel, voltage-gated, type X, alpha subunit | Scn10a | 29571  | 1,44 | down |
| 6084663 | 7350894 | 1747167 | sodium channel, voltage-gated, type X, alpha subunit | Scn10a | 29571  | 1,12 | down |
| 6101143 | 7350894 | 1747188 | sodium channel, voltage-gated, type X, alpha subunit | Scn10a | 29571  | 1,06 | down |
| 6119997 | 7350894 | 1747184 | sodium channel, voltage-gated, type X, alpha subunit | Scn10a | 29571  | 1,46 | up   |
| 6203915 | 7350894 | 1747173 | sodium channel, voltage-gated, type X, alpha subunit | Scn10a | 29571  | 1,02 | down |
| 6240139 | 7350894 | 1747175 | sodium channel, voltage-gated, type X, alpha subunit | Scn10a | 29571  | 1,01 | down |
| 6255129 | 7350894 | 1747177 | sodium channel, voltage-gated, type X, alpha subunit | Scn10a | 29571  | 1,12 | down |
| 6337110 | 7350894 | 1747186 | sodium channel, voltage-gated, type X, alpha subunit | Scn10a | 29571  | 1,29 | up   |
| 6337277 | 7350894 | 1747190 | sodium channel, voltage-gated, type X, alpha subunit | Scn10a | 29571  | 1,04 | down |
| 6348769 | 7350894 | 1747192 | sodium channel, voltage-gated, type X, alpha subunit | Scn10a | 29571  | 1,95 | up   |
| 6373295 | 7350894 | 1747178 | sodium channel, voltage-gated, type X, alpha subunit | Scn10a | 29571  | 1,29 | down |
| 6433809 | 7350894 | 1747191 | sodium channel, voltage-gated, type X, alpha subunit | Scn10a | 29571  | 1,07 | up   |
| 6438886 | 7350894 | 1747169 | sodium channel, voltage-gated, type X, alpha subunit | Scn10a | 29571  | 1,05 | down |
| 6469185 | 7350894 | 1747193 | sodium channel, voltage-gated, type X, alpha subunit | Scn10a | 29571  | 1,29 | up   |
| 6472334 | 7350894 | 1747187 | sodium channel, voltage-gated, type X, alpha subunit | Scn10a | 29571  | 1,00 | up   |
| 6563039 | 7350894 | 1747168 | sodium channel, voltage-gated, type X, alpha subunit | Scn10a | 29571  | 1,14 | down |
| 6608359 | 7350894 | 1747176 | sodium channel, voltage-gated, type X, alpha subunit | Scn10a | 29571  | 1,09 | down |
| 6646439 | 7350894 | 1747179 | sodium channel, voltage-gated, type X, alpha subunit | Scn10a | 29571  | 1,02 | down |
| 6660338 | 7350894 | 1747194 | sodium channel, voltage-gated, type X, alpha subunit | Scn10a | 29571  | 1,01 | down |
| 6687524 | 7350894 | 1747180 | sodium channel, voltage-gated, type X, alpha subunit | Scn10a | 29571  | 1,05 | down |
| 6718030 | 7350894 | 1747185 | sodium channel, voltage-gated, type X, alpha subunit | Scn10a | 29571  | 1,32 | up   |
| 5700337 | 7142431 | 1231877 | sodium leak channel, non-selective                   | Nalcn  | 266760 | 1,21 | up   |



|         |         |         |                                                                      |         |        |      |      |
|---------|---------|---------|----------------------------------------------------------------------|---------|--------|------|------|
| 5782035 | 7142431 | 1231870 | sodium leak channel, non-selective                                   | Nalcn   | 266760 | 1,05 | up   |
| 5789239 | 7142431 | 1231871 | sodium leak channel, non-selective                                   | Nalcn   | 266760 | 1,06 | up   |
| 5860957 | 7142431 | 1231853 | sodium leak channel, non-selective                                   | Nalcn   | 266760 | 1,32 | up   |
| 5866945 | 7142431 | 1231859 | sodium leak channel, non-selective                                   | Nalcn   | 266760 | 1,81 | down |
| 5908233 | 7142431 | 1231865 | sodium leak channel, non-selective                                   | Nalcn   | 266760 | 1,20 | up   |
| 5960535 | 7142431 | 1231849 | sodium leak channel, non-selective                                   | Nalcn   | 266760 | 1,39 | down |
| 5961695 | 7142431 | 1231847 | sodium leak channel, non-selective                                   | Nalcn   | 266760 | 1,16 | up   |
| 5968836 | 7142431 | 1231857 | sodium leak channel, non-selective                                   | Nalcn   | 266760 | 1,04 | up   |
| 5979788 | 7142431 | 1231855 | sodium leak channel, non-selective                                   | Nalcn   | 266760 | 1,05 | up   |
| 6049397 | 7142431 | 1231872 | sodium leak channel, non-selective                                   | Nalcn   | 266760 | 1,03 | down |
| 6086352 | 7142431 | 1231876 | sodium leak channel, non-selective                                   | Nalcn   | 266760 | 1,05 | down |
| 6088028 | 7142431 | 1231858 | sodium leak channel, non-selective                                   | Nalcn   | 266760 | 1,01 | up   |
| 6101481 | 7142431 | 1231869 | sodium leak channel, non-selective                                   | Nalcn   | 266760 | 1,50 | down |
| 6102965 | 7142431 | 1231879 | sodium leak channel, non-selective                                   | Nalcn   | 266760 | 1,52 | up   |
| 6120152 | 7142431 | 1231862 | sodium leak channel, non-selective                                   | Nalcn   | 266760 | 1,05 | down |
| 6167495 | 7142431 | 1231856 | sodium leak channel, non-selective                                   | Nalcn   | 266760 | 1,94 | down |
| 6201529 | 7142431 | 1231881 | sodium leak channel, non-selective                                   | Nalcn   | 266760 | 1,45 | up   |
| 6210435 | 7142431 | 1231867 | sodium leak channel, non-selective                                   | Nalcn   | 266760 | 1,29 | down |
| 6219483 | 7142431 | 1231873 | sodium leak channel, non-selective                                   | Nalcn   | 266760 | 1,04 | up   |
| 6235760 | 7142431 | 1231848 | sodium leak channel, non-selective                                   | Nalcn   | 266760 | 1,05 | up   |
| 6258301 | 7142431 | 1231875 | sodium leak channel, non-selective                                   | Nalcn   | 266760 | 1,21 | down |
| 6299316 | 7142431 | 1231852 | sodium leak channel, non-selective                                   | Nalcn   | 266760 | 1,04 | up   |
| 6357553 | 7142431 | 1231846 | sodium leak channel, non-selective                                   | Nalcn   | 266760 | 1,03 | down |
| 6371439 | 7142431 | 1231868 | sodium leak channel, non-selective                                   | Nalcn   | 266760 | 1,05 | up   |
| 6396124 | 7142431 | 1231866 | sodium leak channel, non-selective                                   | Nalcn   | 266760 | 1,08 | down |
| 6439730 | 7142431 | 1231851 | sodium leak channel, non-selective                                   | Nalcn   | 266760 | 1,16 | down |
| 6442182 | 7142431 | 1231864 | sodium leak channel, non-selective                                   | Nalcn   | 266760 | 1,13 | up   |
| 6472523 | 7142431 | 1231863 | sodium leak channel, non-selective                                   | Nalcn   | 266760 | 1,18 | down |
| 6473662 | 7142431 | 1231880 | sodium leak channel, non-selective                                   | Nalcn   | 266760 | 1,03 | down |
| 6491689 | 7142431 | 1231878 | sodium leak channel, non-selective                                   | Nalcn   | 266760 | 2,14 | up   |
| 6512650 | 7142431 | 1231860 | sodium leak channel, non-selective                                   | Nalcn   | 266760 | 1,11 | down |
| 6608416 | 7142431 | 1231850 | sodium leak channel, non-selective                                   | Nalcn   | 266760 | 1,14 | down |
| 6612405 | 7142431 | 1231861 | sodium leak channel, non-selective                                   | Nalcn   | 266760 | 1,00 | up   |
| 6644356 | 7142431 | 1231874 | sodium leak channel, non-selective                                   | Nalcn   | 266760 | 1,31 | up   |
| 6665717 | 7142431 | 1231854 | sodium leak channel, non-selective                                   | Nalcn   | 266760 | 1,12 | down |
| 5624011 | 7185012 | 1337902 | solute carrier family 12 (potassium/chloride transporters), member 4 | Slc12a4 | 29501  | 1,03 | up   |
| 5678170 | 7185012 | 1337921 | solute carrier family 12 (potassium/chloride transporters), member 4 | Slc12a4 | 29501  | 1,02 | up   |
| 5690886 | 7185012 | 1337920 | solute carrier family 12 (potassium/chloride transporters), member 4 | Slc12a4 | 29501  | 1,26 | down |
| 5709382 | 7185012 | 1337901 | solute carrier family 12 (potassium/chloride transporters), member 4 | Slc12a4 | 29501  | 1,14 | down |
| 5803283 | 7185012 | 1337904 | solute carrier family 12 (potassium/chloride transporters), member 4 | Slc12a4 | 29501  | 1,61 | up   |
| 5804968 | 7185012 | 1337900 | solute carrier family 12 (potassium/chloride transporters), member 4 | Slc12a4 | 29501  | 2,68 | up   |
| 5831361 | 7185012 | 1337900 | solute carrier family 12 (potassium/chloride transporters), member 4 | Slc12a4 | 29501  | 1,19 | down |
| 5833612 | 7185012 | 1337906 | solute carrier family 12 (potassium/chloride transporters), member 4 | Slc12a4 | 29501  | 1,84 | down |
| 5863563 | 7185012 | 1337903 | solute carrier family 12 (potassium/chloride transporters), member 4 | Slc12a4 | 29501  | 1,08 | up   |
| 5898047 | 7185012 | 1337906 | solute carrier family 12 (potassium/chloride transporters), member 4 | Slc12a4 | 29501  | 1,19 | down |
| 5909802 | 7185012 | 1337911 | solute carrier family 12 (potassium/chloride transporters), member 4 | Slc12a4 | 29501  | 1,26 | down |
| 5925572 | 7185012 | 1337914 | solute carrier family 12 (potassium/chloride transporters), member 4 | Slc12a4 | 29501  | 1,14 | down |
| 5935509 | 7185012 | 1337923 | solute carrier family 12 (potassium/chloride transporters), member 4 | Slc12a4 | 29501  | 1,37 | up   |
| 6110173 | 7185012 | 1337918 | solute carrier family 12 (potassium/chloride transporters), member 4 | Slc12a4 | 29501  | 1,65 | down |
| 6126239 | 7185012 | 1337909 | solute carrier family 12 (potassium/chloride transporters), member 4 | Slc12a4 | 29501  | 1,05 | up   |
| 6147458 | 7185012 | 1337907 | solute carrier family 12 (potassium/chloride transporters), member 4 | Slc12a4 | 29501  | 1,26 | down |
| 6208382 | 7185012 | 1337918 | solute carrier family 12 (potassium/chloride transporters), member 4 | Slc12a4 | 29501  | 1,62 | up   |
| 6245911 | 7185012 | 1337900 | solute carrier family 12 (potassium/chloride transporters), member 4 | Slc12a4 | 29501  | 1,32 | up   |
| 6249808 | 7185012 | 1337910 | solute carrier family 12 (potassium/chloride transporters), member 4 | Slc12a4 | 29501  | 1,11 | down |
| 6254109 | 7185012 | 1337910 | solute carrier family 12 (potassium/chloride transporters), member 4 | Slc12a4 | 29501  | 1,16 | down |
| 6289839 | 7185012 | 1337915 | solute carrier family 12 (potassium/chloride transporters), member 4 | Slc12a4 | 29501  | 1,17 | down |

|         |         |         |                                                                      |         |        |      |      |
|---------|---------|---------|----------------------------------------------------------------------|---------|--------|------|------|
| 6311404 | 7185012 | 1337912 | solute carrier family 12 (potassium/chloride transporters), member 4 | Slc12a4 | 29501  | 1,12 | up   |
| 6459505 | 7185012 | 1337913 | solute carrier family 12 (potassium/chloride transporters), member 4 | Slc12a4 | 29501  | 1,31 | up   |
| 6480112 | 7185012 | 1337908 | solute carrier family 12 (potassium/chloride transporters), member 4 | Slc12a4 | 29501  | 1,14 | down |
| 6522137 | 7185012 | 1337916 | solute carrier family 12 (potassium/chloride transporters), member 4 | Slc12a4 | 29501  | 1,32 | down |
| 6535302 | 7185012 | 1337905 | solute carrier family 12 (potassium/chloride transporters), member 4 | Slc12a4 | 29501  | 1,02 | up   |
| 6552922 | 7185012 | 1337917 | solute carrier family 12 (potassium/chloride transporters), member 4 | Slc12a4 | 29501  | 1,09 | up   |
| 6606891 | 7185012 | 1337919 | solute carrier family 12 (potassium/chloride transporters), member 4 | Slc12a4 | 29501  | 1,08 | down |
| 6709491 | 7185012 | 1337922 | solute carrier family 12 (potassium/chloride transporters), member 4 | Slc12a4 | 29501  | 1,18 | up   |
| 5621656 | 7231152 | 1450228 | solute carrier family 12, member 6                                   | Slc12a6 | 691209 | 1,13 | up   |
| 5656604 | 7231152 | 1450259 | solute carrier family 12, member 6                                   | Slc12a6 | 691209 | 1,41 | down |
| 5693148 | 7231152 | 1450242 | solute carrier family 12, member 6                                   | Slc12a6 | 691209 | 1,00 | down |
| 5759681 | 7231152 | 1450246 | solute carrier family 12, member 6                                   | Slc12a6 | 691209 | 1,20 | down |
| 5795097 | 7231152 | 1450251 | solute carrier family 12, member 6                                   | Slc12a6 | 691209 | 1,14 | down |
| 5811046 | 7231152 | 1450228 | solute carrier family 12, member 6                                   | Slc12a6 | 691209 | 1,22 | down |
| 5831342 | 7231152 | 1450247 | solute carrier family 12, member 6                                   | Slc12a6 | 691209 | 1,03 | down |
| 5850327 | 7231152 | 1450256 | solute carrier family 12, member 6                                   | Slc12a6 | 691209 | 1,32 | down |
| 5917115 | 7231152 | 1450241 | solute carrier family 12, member 6                                   | Slc12a6 | 691209 | 1,18 | down |
| 5957862 | 7231152 | 1450260 | solute carrier family 12, member 6                                   | Slc12a6 | 691209 | 1,12 | down |
| 6026180 | 7231152 | 1450249 | solute carrier family 12, member 6                                   | Slc12a6 | 691209 | 1,44 | down |
| 6052675 | 7231152 | 1450261 | solute carrier family 12, member 6                                   | Slc12a6 | 691209 | 1,08 | down |
| 6065891 | 7231152 | 1450240 | solute carrier family 12, member 6                                   | Slc12a6 | 691209 | 1,00 | down |
| 6096607 | 7231152 | 1450238 | solute carrier family 12, member 6                                   | Slc12a6 | 691209 | 1,25 | up   |
| 6123549 | 7231152 | 1450244 | solute carrier family 12, member 6                                   | Slc12a6 | 691209 | 1,08 | up   |
| 6180644 | 7231152 | 1450253 | solute carrier family 12, member 6                                   | Slc12a6 | 691209 | 1,35 | down |
| 6211872 | 7231152 | 1450245 | solute carrier family 12, member 6                                   | Slc12a6 | 691209 | 1,30 | down |
| 6398368 | 7231152 | 1450245 | solute carrier family 12, member 6                                   | Slc12a6 | 691209 | 1,43 | down |
| 6405995 | 7231152 | 1450239 | solute carrier family 12, member 6                                   | Slc12a6 | 691209 | 1,52 | down |
| 6416351 | 7231152 | 1450255 | solute carrier family 12, member 6                                   | Slc12a6 | 691209 | 1,15 | down |
| 6518985 | 7231152 | 1450258 | solute carrier family 12, member 6                                   | Slc12a6 | 691209 | 1,20 | down |
| 6572220 | 7231152 | 1450243 | solute carrier family 12, member 6                                   | Slc12a6 | 691209 | 1,11 | down |
| 6593065 | 7231152 | 1450249 | solute carrier family 12, member 6                                   | Slc12a6 | 691209 | 1,18 | down |
| 6624395 | 7231152 | 1450248 | solute carrier family 12, member 6                                   | Slc12a6 | 691209 | 1,48 | down |
| 6670508 | 7231152 | 1450257 | solute carrier family 12, member 6                                   | Slc12a6 | 691209 | 1,24 | down |
| 6685894 | 7231152 | 1450252 | solute carrier family 12, member 6                                   | Slc12a6 | 691209 | 1,08 | down |
| 6695104 | 7231152 | 1450254 | solute carrier family 12, member 6                                   | Slc12a6 | 691209 | 1,32 | up   |
| 6720071 | 7231152 | 1450258 | solute carrier family 12, member 6                                   | Slc12a6 | 691209 | 1,10 | down |
| 5655861 | 7039734 | 984870  | solute carrier family 15, member 3                                   | Slc15a3 | 246239 | 1,02 | down |
| 5698133 | 7039734 | 984873  | solute carrier family 15, member 3                                   | Slc15a3 | 246239 | 1,10 | up   |
| 5753053 | 7039734 | 984871  | solute carrier family 15, member 3                                   | Slc15a3 | 246239 | 2,37 | up   |
| 5775550 | 7039734 | 984875  | solute carrier family 15, member 3                                   | Slc15a3 | 246239 | 1,21 | down |
| 5845663 | 7039734 | 984872  | solute carrier family 15, member 3                                   | Slc15a3 | 246239 | 1,00 | up   |
| 5932975 | 7039734 | 984874  | solute carrier family 15, member 3                                   | Slc15a3 | 246239 | 1,07 | down |
| 6250915 | 7039734 | 984876  | solute carrier family 15, member 3                                   | Slc15a3 | 246239 | 1,17 | down |
| 6292633 | 7039734 | 984876  | solute carrier family 15, member 3                                   | Slc15a3 | 246239 | 1,70 | down |
| 6501765 | 7039734 | 984871  | solute carrier family 15, member 3                                   | Slc15a3 | 246239 | 1,27 | down |
| 6590680 | 7039734 | 984870  | solute carrier family 15, member 3                                   | Slc15a3 | 246239 | 1,18 | down |
| 6694850 | 7039734 | 984869  | solute carrier family 15, member 3                                   | Slc15a3 | 246239 | 1,05 | up   |
| 6712216 | 7039734 | 984870  | solute carrier family 15, member 3                                   | Slc15a3 | 246239 | 1,29 | up   |
| 5630671 | 7279020 | 1570524 | solute carrier family 2 (facilitated glucose transporter), member 1  | Slc2a1  | 24778  | 1,96 | up   |
| 5641095 | 7279020 | 1570530 | solute carrier family 2 (facilitated glucose transporter), member 1  | Slc2a1  | 24778  | 1,09 | down |
| 5679473 | 7279020 | 1570528 | solute carrier family 2 (facilitated glucose transporter), member 1  | Slc2a1  | 24778  | 1,14 | down |
| 5752585 | 7279020 | 1570526 | solute carrier family 2 (facilitated glucose transporter), member 1  | Slc2a1  | 24778  | 1,18 | up   |
| 5834936 | 7279020 | 1570524 | solute carrier family 2 (facilitated glucose transporter), member 1  | Slc2a1  | 24778  | 1,04 | down |
| 5839359 | 7279020 | 1570527 | solute carrier family 2 (facilitated glucose transporter), member 1  | Slc2a1  | 24778  | 1,15 | up   |
| 5904241 | 7279020 | 1570531 | solute carrier family 2 (facilitated glucose transporter), member 1  | Slc2a1  | 24778  | 1,27 | down |
| 6007677 | 7279020 | 1570529 | solute carrier family 2 (facilitated glucose transporter), member 1  | Slc2a1  | 24778  | 1,23 | down |

|         |         |         |                                                                              |          |        |      |      |
|---------|---------|---------|------------------------------------------------------------------------------|----------|--------|------|------|
| 6027800 | 7279020 | 1570534 | solute carrier family 2 (facilitated glucose transporter), member 1          | Slc2a1   | 24778  | 1,18 | down |
| 6077109 | 7279020 | 1570533 | solute carrier family 2 (facilitated glucose transporter), member 1          | Slc2a1   | 24778  | 1,03 | down |
| 6356727 | 7279020 | 1570524 | solute carrier family 2 (facilitated glucose transporter), member 1          | Slc2a1   | 24778  | 7,04 | down |
| 6533472 | 7279020 | 1570525 | solute carrier family 2 (facilitated glucose transporter), member 1          | Slc2a1   | 24778  | 1,01 | down |
| 6594222 | 7279020 | 1570532 | solute carrier family 2 (facilitated glucose transporter), member 1          | Slc2a1   | 24778  | 1,30 | up   |
| 6622915 | 7279020 | 1570526 | solute carrier family 2 (facilitated glucose transporter), member 1          | Slc2a1   | 24778  | 1,07 | down |
| 5645887 | 7330872 | 1697659 | solute carrier family 2 (facilitated glucose transporter), member 13         | Slc2a13  | 171147 | 1,27 | up   |
| 5687848 | 7330872 | 1697669 | solute carrier family 2 (facilitated glucose transporter), member 13         | Slc2a13  | 171147 | 1,04 | up   |
| 5825445 | 7330872 | 1697669 | solute carrier family 2 (facilitated glucose transporter), member 13         | Slc2a13  | 171147 | 4,12 | up   |
| 6127958 | 7330872 | 1697669 | solute carrier family 2 (facilitated glucose transporter), member 13         | Slc2a13  | 171147 | 1,03 | down |
| 6179918 | 7330872 | 1697661 | solute carrier family 2 (facilitated glucose transporter), member 13         | Slc2a13  | 171147 | 1,12 | down |
| 6351329 | 7330872 | 1697660 | solute carrier family 2 (facilitated glucose transporter), member 13         | Slc2a13  | 171147 | 1,84 | down |
| 6369367 | 7330872 | 1697668 | solute carrier family 2 (facilitated glucose transporter), member 13         | Slc2a13  | 171147 | 1,01 | down |
| 6440772 | 7330872 | 1697662 | solute carrier family 2 (facilitated glucose transporter), member 13         | Slc2a13  | 171147 | 1,01 | up   |
| 6542764 | 7330872 | 1697663 | solute carrier family 2 (facilitated glucose transporter), member 13         | Slc2a13  | 171147 | 1,33 | down |
| 6549615 | 7330872 | 1697665 | solute carrier family 2 (facilitated glucose transporter), member 13         | Slc2a13  | 171147 | 1,12 | up   |
| 6558637 | 7330872 | 1697666 | solute carrier family 2 (facilitated glucose transporter), member 13         | Slc2a13  | 171147 | 1,91 | up   |
| 6558827 | 7330872 | 1697664 | solute carrier family 2 (facilitated glucose transporter), member 13         | Slc2a13  | 171147 | 1,10 | down |
| 6560382 | 7330872 | 1697667 | solute carrier family 2 (facilitated glucose transporter), member 13         | Slc2a13  | 171147 | 1,22 | up   |
| 6602479 | 7330872 | 1697664 | solute carrier family 2 (facilitated glucose transporter), member 13         | Slc2a13  | 171147 | 1,25 | down |
| 5791290 | 7281641 | 1577022 | solute carrier family 2 (facilitated glucose/fructose transporter), member 5 | Slc2a5   | 65197  | 1,02 | up   |
| 5900005 | 7281641 | 1577011 | solute carrier family 2 (facilitated glucose/fructose transporter), member 5 | Slc2a5   | 65197  | 1,28 | up   |
| 5995223 | 7281641 | 1577012 | solute carrier family 2 (facilitated glucose/fructose transporter), member 5 | Slc2a5   | 65197  | 1,09 | down |
| 6062680 | 7281641 | 1577021 | solute carrier family 2 (facilitated glucose/fructose transporter), member 5 | Slc2a5   | 65197  | 1,78 | up   |
| 6079535 | 7281641 | 1577018 | solute carrier family 2 (facilitated glucose/fructose transporter), member 5 | Slc2a5   | 65197  | 1,05 | down |
| 6263989 | 7281641 | 1577017 | solute carrier family 2 (facilitated glucose/fructose transporter), member 5 | Slc2a5   | 65197  | 1,00 | up   |
| 6395273 | 7281641 | 1577016 | solute carrier family 2 (facilitated glucose/fructose transporter), member 5 | Slc2a5   | 65197  | 1,40 | down |
| 6565481 | 7281641 | 1577013 | solute carrier family 2 (facilitated glucose/fructose transporter), member 5 | Slc2a5   | 65197  | 1,05 | up   |
| 6577157 | 7281641 | 1577015 | solute carrier family 2 (facilitated glucose/fructose transporter), member 5 | Slc2a5   | 65197  | 1,02 | up   |
| 6578063 | 7281641 | 1577020 | solute carrier family 2 (facilitated glucose/fructose transporter), member 5 | Slc2a5   | 65197  | 1,60 | down |
| 6666303 | 7281641 | 1577014 | solute carrier family 2 (facilitated glucose/fructose transporter), member 5 | Slc2a5   | 65197  | 1,51 | up   |
| 6723901 | 7281641 | 1577016 | solute carrier family 2 (facilitated glucose/fructose transporter), member 5 | Slc2a5   | 65197  | 2,18 | down |
| 6738396 | 7281641 | 1577022 | solute carrier family 2 (facilitated glucose/fructose transporter), member 5 | Slc2a5   | 65197  | 1,58 | up   |
| 6741136 | 7281641 | 1577019 | solute carrier family 2 (facilitated glucose/fructose transporter), member 5 | Slc2a5   | 65197  | 1,01 | up   |
| 5633376 | 7027131 | 954229  | solute carrier family 22 (extraneuronal monoamine transporter), member 3     | Slc22a3  | 29504  | 1,07 | up   |
| 5644502 | 7027131 | 954221  | solute carrier family 22 (extraneuronal monoamine transporter), member 3     | Slc22a3  | 29504  | 1,16 | down |
| 5677957 | 7027131 | 954220  | solute carrier family 22 (extraneuronal monoamine transporter), member 3     | Slc22a3  | 29504  | 1,45 | up   |
| 5681177 | 7027131 | 954224  | solute carrier family 22 (extraneuronal monoamine transporter), member 3     | Slc22a3  | 29504  | 1,54 | down |
| 5802122 | 7027131 | 954226  | solute carrier family 22 (extraneuronal monoamine transporter), member 3     | Slc22a3  | 29504  | 1,02 | down |
| 5983020 | 7027131 | 954225  | solute carrier family 22 (extraneuronal monoamine transporter), member 3     | Slc22a3  | 29504  | 1,04 | up   |
| 5996250 | 7027131 | 954219  | solute carrier family 22 (extraneuronal monoamine transporter), member 3     | Slc22a3  | 29504  | 1,11 | down |
| 6034932 | 7027131 | 954229  | solute carrier family 22 (extraneuronal monoamine transporter), member 3     | Slc22a3  | 29504  | 1,06 | down |
| 6038708 | 7027131 | 954224  | solute carrier family 22 (extraneuronal monoamine transporter), member 3     | Slc22a3  | 29504  | 2,38 | up   |
| 6085737 | 7027131 | 954219  | solute carrier family 22 (extraneuronal monoamine transporter), member 3     | Slc22a3  | 29504  | 1,14 | up   |
| 6089299 | 7027131 | 954227  | solute carrier family 22 (extraneuronal monoamine transporter), member 3     | Slc22a3  | 29504  | 1,00 | up   |
| 6110095 | 7027131 | 954223  | solute carrier family 22 (extraneuronal monoamine transporter), member 3     | Slc22a3  | 29504  | 1,60 | up   |
| 6346005 | 7027131 | 954228  | solute carrier family 22 (extraneuronal monoamine transporter), member 3     | Slc22a3  | 29504  | 1,30 | down |
| 6384515 | 7027131 | 954222  | solute carrier family 22 (extraneuronal monoamine transporter), member 3     | Slc22a3  | 29504  | 1,60 | up   |
| 6549272 | 7027131 | 954220  | solute carrier family 22 (extraneuronal monoamine transporter), member 3     | Slc22a3  | 29504  | 1,04 | up   |
| 6681515 | 7027131 | 954227  | solute carrier family 22 (extraneuronal monoamine transporter), member 3     | Slc22a3  | 29504  | 1,57 | down |
| 6733994 | 7027131 | 954229  | solute carrier family 22 (extraneuronal monoamine transporter), member 3     | Slc22a3  | 29504  | 1,04 | up   |
| 5703169 | 7350855 | 1747004 | solute carrier family 22 (organic anion transporter), member 13              | Slc22a13 | 316062 | 1,12 | up   |
| 5997250 | 7350855 | 1747002 | solute carrier family 22 (organic anion transporter), member 13              | Slc22a13 | 316062 | 1,42 | up   |
| 6000006 | 7350855 | 1747000 | solute carrier family 22 (organic anion transporter), member 13              | Slc22a13 | 316062 | 2,02 | down |
| 6001038 | 7350855 | 1746999 | solute carrier family 22 (organic anion transporter), member 13              | Slc22a13 | 316062 | 1,34 | up   |
| 6122873 | 7350855 | 1747000 | solute carrier family 22 (organic anion transporter), member 13              | Slc22a13 | 316062 | 1,30 | up   |

|         |         |         |                                                                         |          |        |      |      |
|---------|---------|---------|-------------------------------------------------------------------------|----------|--------|------|------|
| 6149860 | 7350855 | 1747007 | solute carrier family 22 (organic anion transporter), member 13         | Slc22a13 | 316062 | 1,02 | down |
| 6175637 | 7350855 | 1747003 | solute carrier family 22 (organic anion transporter), member 13         | Slc22a13 | 316062 | 1,70 | down |
| 6240477 | 7350855 | 1747006 | solute carrier family 22 (organic anion transporter), member 13         | Slc22a13 | 316062 | 1,01 | up   |
| 6389333 | 7350855 | 1747001 | solute carrier family 22 (organic anion transporter), member 13         | Slc22a13 | 316062 | 1,05 | up   |
| 6500510 | 7350855 | 1747006 | solute carrier family 22 (organic anion transporter), member 13         | Slc22a13 | 316062 | 1,16 | down |
| 6553733 | 7350855 | 1747010 | solute carrier family 22 (organic anion transporter), member 13         | Slc22a13 | 316062 | 1,18 | up   |
| 6582715 | 7350855 | 1747010 | solute carrier family 22 (organic anion transporter), member 13         | Slc22a13 | 316062 | 1,45 | up   |
| 6705487 | 7350855 | 1746999 | solute carrier family 22 (organic anion transporter), member 13         | Slc22a13 | 316062 | 1,06 | up   |
| 6707204 | 7350855 | 1747005 | solute carrier family 22 (organic anion transporter), member 13         | Slc22a13 | 316062 | 1,11 | up   |
| 5767249 | 7138103 | 1221372 | solute carrier family 22, member 17                                     | Slc22a17 | 305886 | 1,29 | up   |
| 5836134 | 7138103 | 1221366 | solute carrier family 22, member 17                                     | Slc22a17 | 305886 | 1,47 | down |
| 5917581 | 7138103 | 1221371 | solute carrier family 22, member 17                                     | Slc22a17 | 305886 | 1,19 | up   |
| 5942565 | 7138103 | 1221373 | solute carrier family 22, member 17                                     | Slc22a17 | 305886 | 1,27 | up   |
| 5962095 | 7138103 | 1221370 | solute carrier family 22, member 17                                     | Slc22a17 | 305886 | 1,07 | down |
| 6083716 | 7138103 | 1221372 | solute carrier family 22, member 17                                     | Slc22a17 | 305886 | 2,27 | up   |
| 6107834 | 7138103 | 1221364 | solute carrier family 22, member 17                                     | Slc22a17 | 305886 | 1,06 | up   |
| 6110900 | 7138103 | 1221367 | solute carrier family 22, member 17                                     | Slc22a17 | 305886 | 1,20 | down |
| 6136764 | 7138103 | 1221364 | solute carrier family 22, member 17                                     | Slc22a17 | 305886 | 1,36 | down |
| 6254752 | 7138103 | 1221368 | solute carrier family 22, member 17                                     | Slc22a17 | 305886 | 1,10 | down |
| 6358100 | 7138103 | 1221369 | solute carrier family 22, member 17                                     | Slc22a17 | 305886 | 1,29 | up   |
| 6430554 | 7138103 | 1221363 | solute carrier family 22, member 17                                     | Slc22a17 | 305886 | 1,29 | up   |
| 6447814 | 7138103 | 1221373 | solute carrier family 22, member 17                                     | Slc22a17 | 305886 | 1,09 | up   |
| 6559993 | 7138103 | 1221365 | solute carrier family 22, member 17                                     | Slc22a17 | 305886 | 1,23 | down |
| 6718961 | 7138103 | 1221366 | solute carrier family 22, member 17                                     | Slc22a17 | 305886 | 1,02 | up   |
| 6722075 | 7138103 | 1221372 | solute carrier family 22, member 17                                     | Slc22a17 | 305886 | 1,72 | up   |
| 5642305 | 7038710 | 982328  | solute carrier family 22, member 18                                     | Slc22a18 | 309131 | 1,08 | up   |
| 5744906 | 7038710 | 982322  | solute carrier family 22, member 18                                     | Slc22a18 | 309131 | 1,27 | down |
| 5956522 | 7038710 | 982324  | solute carrier family 22, member 18                                     | Slc22a18 | 309131 | 1,28 | down |
| 5957709 | 7038710 | 982325  | solute carrier family 22, member 18                                     | Slc22a18 | 309131 | 1,09 | up   |
| 5985689 | 7038710 | 982323  | solute carrier family 22, member 18                                     | Slc22a18 | 309131 | 1,03 | up   |
| 5991989 | 7038710 | 982320  | solute carrier family 22, member 18                                     | Slc22a18 | 309131 | 1,30 | up   |
| 6011598 | 7038710 | 982330  | solute carrier family 22, member 18                                     | Slc22a18 | 309131 | 1,05 | up   |
| 6046050 | 7038710 | 982323  | solute carrier family 22, member 18                                     | Slc22a18 | 309131 | 2,53 | up   |
| 6049197 | 7038710 | 982329  | solute carrier family 22, member 18                                     | Slc22a18 | 309131 | 1,36 | down |
| 6055546 | 7038710 | 982320  | solute carrier family 22, member 18                                     | Slc22a18 | 309131 | 1,18 | up   |
| 6122944 | 7038710 | 982328  | solute carrier family 22, member 18                                     | Slc22a18 | 309131 | 1,09 | up   |
| 6193132 | 7038710 | 982321  | solute carrier family 22, member 18                                     | Slc22a18 | 309131 | 1,09 | up   |
| 6286115 | 7038710 | 982327  | solute carrier family 22, member 18                                     | Slc22a18 | 309131 | 1,01 | up   |
| 6427911 | 7038710 | 982320  | solute carrier family 22, member 18                                     | Slc22a18 | 309131 | 1,47 | down |
| 6547810 | 7038710 | 982320  | solute carrier family 22, member 18                                     | Slc22a18 | 309131 | 1,05 | up   |
| 6634793 | 7038710 | 982324  | solute carrier family 22, member 18                                     | Slc22a18 | 309131 | 1,01 | down |
| 6640963 | 7038710 | 982326  | solute carrier family 22, member 18                                     | Slc22a18 | 309131 | 1,19 | down |
| 5636375 | 7301140 | 1624563 | solute carrier family 24 (sodium/potassium/calcium exchanger), member 4 | Slc24a4  | 314396 | 1,73 | up   |
| 5682114 | 7301140 | 1624540 | solute carrier family 24 (sodium/potassium/calcium exchanger), member 4 | Slc24a4  | 314396 | 1,74 | up   |
| 5723299 | 7301140 | 1624585 | solute carrier family 24 (sodium/potassium/calcium exchanger), member 4 | Slc24a4  | 314396 | 1,06 | down |
| 5802382 | 7301140 | 1624589 | solute carrier family 24 (sodium/potassium/calcium exchanger), member 4 | Slc24a4  | 314396 | 1,20 | down |
| 5882233 | 7301140 | 1624541 | solute carrier family 24 (sodium/potassium/calcium exchanger), member 4 | Slc24a4  | 314396 | 1,01 | down |
| 5889364 | 7301140 | 1624568 | solute carrier family 24 (sodium/potassium/calcium exchanger), member 4 | Slc24a4  | 314396 | 2,15 | up   |
| 5935670 | 7301140 | 1624566 | solute carrier family 24 (sodium/potassium/calcium exchanger), member 4 | Slc24a4  | 314396 | 1,05 | up   |
| 5941521 | 7301140 | 1624578 | solute carrier family 24 (sodium/potassium/calcium exchanger), member 4 | Slc24a4  | 314396 | 1,80 | up   |
| 6050698 | 7301140 | 1624545 | solute carrier family 24 (sodium/potassium/calcium exchanger), member 4 | Slc24a4  | 314396 | 1,01 | down |
| 6113884 | 7301140 | 1624569 | solute carrier family 24 (sodium/potassium/calcium exchanger), member 4 | Slc24a4  | 314396 | 1,12 | up   |
| 6139194 | 7301140 | 1624592 | solute carrier family 24 (sodium/potassium/calcium exchanger), member 4 | Slc24a4  | 314396 | 1,00 | up   |
| 6147767 | 7301140 | 1624565 | solute carrier family 24 (sodium/potassium/calcium exchanger), member 4 | Slc24a4  | 314396 | 1,30 | up   |
| 6261634 | 7301140 | 1624567 | solute carrier family 24 (sodium/potassium/calcium exchanger), member 4 | Slc24a4  | 314396 | 1,50 | up   |
| 6381850 | 7301140 | 1624592 | solute carrier family 24 (sodium/potassium/calcium exchanger), member 4 | Slc24a4  | 314396 | 1,10 | up   |

|         |         |         |                                                                                |          |        |      |      |
|---------|---------|---------|--------------------------------------------------------------------------------|----------|--------|------|------|
| 6481246 | 7301140 | 1624571 | solute carrier family 24 (sodium/potassium/calcium exchanger), member 4        | Slc24a4  | 314396 | 2,08 | up   |
| 6564367 | 7301140 | 1624587 | solute carrier family 24 (sodium/potassium/calcium exchanger), member 4        | Slc24a4  | 314396 | 1,19 | up   |
| 6588047 | 7301140 | 1624575 | solute carrier family 24 (sodium/potassium/calcium exchanger), member 4        | Slc24a4  | 314396 | 1,59 | down |
| 6625018 | 7301140 | 1624570 | solute carrier family 24 (sodium/potassium/calcium exchanger), member 4        | Slc24a4  | 314396 | 1,95 | up   |
| 6638962 | 7301140 | 1624582 | solute carrier family 24 (sodium/potassium/calcium exchanger), member 4        | Slc24a4  | 314396 | 1,03 | down |
| 6680861 | 7301140 | 1624540 | solute carrier family 24 (sodium/potassium/calcium exchanger), member 4        | Slc24a4  | 314396 | 2,06 | down |
| 6715666 | 7301140 | 1624539 | solute carrier family 24 (sodium/potassium/calcium exchanger), member 4        | Slc24a4  | 314396 | 1,21 | up   |
| 5620100 | 7102483 | 1133758 | solute carrier family 24 (sodium/potassium/calcium exchanger), member 6        | Slc24a6  | 498185 | 1,18 | down |
| 5647858 | 7102483 | 1133769 | solute carrier family 24 (sodium/potassium/calcium exchanger), member 6        | Slc24a6  | 498185 | 1,23 | down |
| 5662526 | 7102483 | 1133769 | solute carrier family 24 (sodium/potassium/calcium exchanger), member 6        | Slc24a6  | 498185 | 2,10 | down |
| 5714442 | 7102483 | 1133757 | solute carrier family 24 (sodium/potassium/calcium exchanger), member 6        | Slc24a6  | 498185 | 1,04 | down |
| 5752477 | 7102483 | 1133763 | solute carrier family 24 (sodium/potassium/calcium exchanger), member 6        | Slc24a6  | 498185 | 1,84 | up   |
| 5835991 | 7102483 | 1133764 | solute carrier family 24 (sodium/potassium/calcium exchanger), member 6        | Slc24a6  | 498185 | 1,34 | down |
| 5894677 | 7102483 | 1133767 | solute carrier family 24 (sodium/potassium/calcium exchanger), member 6        | Slc24a6  | 498185 | 1,01 | down |
| 6018214 | 7102483 | 1133765 | solute carrier family 24 (sodium/potassium/calcium exchanger), member 6        | Slc24a6  | 498185 | 1,18 | down |
| 6053796 | 7102483 | 1133756 | solute carrier family 24 (sodium/potassium/calcium exchanger), member 6        | Slc24a6  | 498185 | 1,20 | down |
| 6107220 | 7102483 | 1133765 | solute carrier family 24 (sodium/potassium/calcium exchanger), member 6        | Slc24a6  | 498185 | 1,52 | up   |
| 6111508 | 7102483 | 1133759 | solute carrier family 24 (sodium/potassium/calcium exchanger), member 6        | Slc24a6  | 498185 | 1,42 | down |
| 6253745 | 7102483 | 1133760 | solute carrier family 24 (sodium/potassium/calcium exchanger), member 6        | Slc24a6  | 498185 | 1,29 | up   |
| 6479303 | 7102483 | 1133766 | solute carrier family 24 (sodium/potassium/calcium exchanger), member 6        | Slc24a6  | 498185 | 1,14 | up   |
| 6512197 | 7102483 | 1133755 | solute carrier family 24 (sodium/potassium/calcium exchanger), member 6        | Slc24a6  | 498185 | 1,27 | down |
| 6532559 | 7102483 | 1133768 | solute carrier family 24 (sodium/potassium/calcium exchanger), member 6        | Slc24a6  | 498185 | 1,00 | up   |
| 6596623 | 7102483 | 1133761 | solute carrier family 24 (sodium/potassium/calcium exchanger), member 6        | Slc24a6  | 498185 | 1,24 | up   |
| 6712330 | 7102483 | 1133762 | solute carrier family 24 (sodium/potassium/calcium exchanger), member 6        | Slc24a6  | 498185 | 1,07 | up   |
| 6732516 | 7102483 | 1133755 | solute carrier family 24 (sodium/potassium/calcium exchanger), member 6        | Slc24a6  | 498185 | 1,37 | down |
| 5658400 | 7377505 | 1815273 | solute carrier family 25 (mitochondrial carrier, brain), member 14             | Slc25a14 | 85263  | 1,08 | up   |
| 5975739 | 7377505 | 1815278 | solute carrier family 25 (mitochondrial carrier, brain), member 14             | Slc25a14 | 85263  | 1,21 | down |
| 6038588 | 7377505 | 1815281 | solute carrier family 25 (mitochondrial carrier, brain), member 14             | Slc25a14 | 85263  | 1,06 | down |
| 6060426 | 7377505 | 1815276 | solute carrier family 25 (mitochondrial carrier, brain), member 14             | Slc25a14 | 85263  | 1,33 | down |
| 6083358 | 7377505 | 1815275 | solute carrier family 25 (mitochondrial carrier, brain), member 14             | Slc25a14 | 85263  | 2,58 | up   |
| 6156319 | 7377505 | 1815274 | solute carrier family 25 (mitochondrial carrier, brain), member 14             | Slc25a14 | 85263  | 1,58 | down |
| 6348175 | 7377505 | 1815272 | solute carrier family 25 (mitochondrial carrier, brain), member 14             | Slc25a14 | 85263  | 1,64 | up   |
| 6480025 | 7377505 | 1815277 | solute carrier family 25 (mitochondrial carrier, brain), member 14             | Slc25a14 | 85263  | 1,03 | up   |
| 6499482 | 7377505 | 1815279 | solute carrier family 25 (mitochondrial carrier, brain), member 14             | Slc25a14 | 85263  | 1,00 | up   |
| 6556965 | 7377505 | 1815272 | solute carrier family 25 (mitochondrial carrier, brain), member 14             | Slc25a14 | 85263  | 1,34 | down |
| 6645800 | 7377505 | 1815280 | solute carrier family 25 (mitochondrial carrier, brain), member 14             | Slc25a14 | 85263  | 1,03 | down |
| 6656213 | 7377505 | 1815281 | solute carrier family 25 (mitochondrial carrier, brain), member 14             | Slc25a14 | 85263  | 1,04 | up   |
| 6656472 | 7377505 | 1815275 | solute carrier family 25 (mitochondrial carrier, brain), member 14             | Slc25a14 | 85263  | 1,05 | up   |
| 5651224 | 7237652 | 1467258 | solute carrier family 25 (mitochondrial carrier, phosphate carrier), member 25 | Slc25a25 | 246771 | 2,30 | down |
| 5819898 | 7237652 | 1467254 | solute carrier family 25 (mitochondrial carrier, phosphate carrier), member 25 | Slc25a25 | 246771 | 1,07 | down |
| 5830534 | 7237652 | 1467255 | solute carrier family 25 (mitochondrial carrier, phosphate carrier), member 25 | Slc25a25 | 246771 | 1,03 | up   |
| 6089518 | 7237652 | 1467250 | solute carrier family 25 (mitochondrial carrier, phosphate carrier), member 25 | Slc25a25 | 246771 | 1,04 | down |
| 6160454 | 7237652 | 1467249 | solute carrier family 25 (mitochondrial carrier, phosphate carrier), member 25 | Slc25a25 | 246771 | 1,16 | up   |
| 6305500 | 7237652 | 1467257 | solute carrier family 25 (mitochondrial carrier, phosphate carrier), member 25 | Slc25a25 | 246771 | 1,22 | up   |
| 6350039 | 7237652 | 1467248 | solute carrier family 25 (mitochondrial carrier, phosphate carrier), member 25 | Slc25a25 | 246771 | 1,13 | down |
| 6484468 | 7237652 | 1467256 | solute carrier family 25 (mitochondrial carrier, phosphate carrier), member 25 | Slc25a25 | 246771 | 1,04 | down |
| 6486041 | 7237652 | 1467251 | solute carrier family 25 (mitochondrial carrier, phosphate carrier), member 25 | Slc25a25 | 246771 | 1,10 | up   |
| 6565929 | 7237652 | 1467253 | solute carrier family 25 (mitochondrial carrier, phosphate carrier), member 25 | Slc25a25 | 246771 | 1,37 | up   |
| 6605565 | 7237652 | 1467258 | solute carrier family 25 (mitochondrial carrier, phosphate carrier), member 25 | Slc25a25 | 246771 | 1,67 | up   |
| 6667764 | 7237652 | 1467252 | solute carrier family 25 (mitochondrial carrier, phosphate carrier), member 25 | Slc25a25 | 246771 | 1,27 | down |
| 5740753 | 7292644 | 1602787 | solute carrier family 25, member 34                                            | Slc25a34 | 298606 | 1,29 | up   |
| 5821523 | 7292644 | 1602790 | solute carrier family 25, member 34                                            | Slc25a34 | 298606 | 1,17 | up   |
| 5879257 | 7292644 | 1602791 | solute carrier family 25, member 34                                            | Slc25a34 | 298606 | 1,05 | up   |
| 6139357 | 7292644 | 1602789 | solute carrier family 25, member 34                                            | Slc25a34 | 298606 | 1,06 | up   |
| 6311131 | 7292644 | 1602788 | solute carrier family 25, member 34                                            | Slc25a34 | 298606 | 1,02 | down |
| 6386961 | 7292644 | 1602786 | solute carrier family 25, member 34                                            | Slc25a34 | 298606 | 2,06 | down |

|         |         |         |                                                          |          |        |      |      |
|---------|---------|---------|----------------------------------------------------------|----------|--------|------|------|
| 6690328 | 7292644 | 1602791 | solute carrier family 25, member 34                      | Slc25a34 | 298606 | 1,03 | down |
| 6739233 | 7292644 | 1602787 | solute carrier family 25, member 34                      | Slc25a34 | 298606 | 2,46 | down |
| 5618112 | 7083021 | 1086213 | solute carrier family 25, member 39                      | Slc25a39 | 360636 | 1,45 | down |
| 5700013 | 7083021 | 1086209 | solute carrier family 25, member 39                      | Slc25a39 | 360636 | 1,32 | down |
| 5915664 | 7083021 | 1086215 | solute carrier family 25, member 39                      | Slc25a39 | 360636 | 1,02 | down |
| 5947729 | 7083021 | 1086213 | solute carrier family 25, member 39                      | Slc25a39 | 360636 | 1,00 | up   |
| 5961285 | 7083021 | 1086210 | solute carrier family 25, member 39                      | Slc25a39 | 360636 | 2,09 | down |
| 5973820 | 7083021 | 1086210 | solute carrier family 25, member 39                      | Slc25a39 | 360636 | 1,24 | down |
| 6340119 | 7083021 | 1086218 | solute carrier family 25, member 39                      | Slc25a39 | 360636 | 1,39 | up   |
| 6343022 | 7083021 | 1086208 | solute carrier family 25, member 39                      | Slc25a39 | 360636 | 1,25 | down |
| 6431751 | 7083021 | 1086212 | solute carrier family 25, member 39                      | Slc25a39 | 360636 | 1,14 | down |
| 6517679 | 7083021 | 1086216 | solute carrier family 25, member 39                      | Slc25a39 | 360636 | 1,98 | down |
| 6567952 | 7083021 | 1086211 | solute carrier family 25, member 39                      | Slc25a39 | 360636 | 1,14 | up   |
| 6579050 | 7083021 | 1086221 | solute carrier family 25, member 39                      | Slc25a39 | 360636 | 1,03 | up   |
| 6588475 | 7083021 | 1086214 | solute carrier family 25, member 39                      | Slc25a39 | 360636 | 1,05 | up   |
| 6650265 | 7083021 | 1086217 | solute carrier family 25, member 39                      | Slc25a39 | 360636 | 1,08 | down |
| 5687658 | 7174114 | 1310434 | solute carrier family 25, member 46                      | Slc25a46 | 291709 | 1,01 | down |
| 5782236 | 7174114 | 1310439 | solute carrier family 25, member 46                      | Slc25a46 | 291709 | 1,26 | down |
| 5806453 | 7174114 | 1310437 | solute carrier family 25, member 46                      | Slc25a46 | 291709 | 1,21 | down |
| 5817978 | 7174114 | 1310439 | solute carrier family 25, member 46                      | Slc25a46 | 291709 | 1,04 | up   |
| 6061181 | 7174114 | 1310439 | solute carrier family 25, member 46                      | Slc25a46 | 291709 | 1,01 | up   |
| 6175405 | 7174114 | 1310430 | solute carrier family 25, member 46                      | Slc25a46 | 291709 | 1,37 | down |
| 6195961 | 7174114 | 1310429 | solute carrier family 25, member 46                      | Slc25a46 | 291709 | 1,19 | down |
| 6368049 | 7174114 | 1310431 | solute carrier family 25, member 46                      | Slc25a46 | 291709 | 2,49 | up   |
| 6507313 | 7174114 | 1310438 | solute carrier family 25, member 46                      | Slc25a46 | 291709 | 1,09 | up   |
| 6611177 | 7174114 | 1310429 | solute carrier family 25, member 46                      | Slc25a46 | 291709 | 1,52 | down |
| 6634085 | 7174114 | 1310436 | solute carrier family 25, member 46                      | Slc25a46 | 291709 | 1,17 | down |
| 6035155 | 7176282 | 1315372 | solute carrier family 26 (sulfate transporter), member 2 | Slc26a2  | 117267 | 2,26 | up   |
| 6300218 | 7176282 | 1315368 | solute carrier family 26 (sulfate transporter), member 2 | Slc26a2  | 117267 | 1,09 | up   |
| 6458209 | 7176282 | 1315370 | solute carrier family 26 (sulfate transporter), member 2 | Slc26a2  | 117267 | 1,19 | up   |
| 6529544 | 7176282 | 1315371 | solute carrier family 26 (sulfate transporter), member 2 | Slc26a2  | 117267 | 1,37 | down |
| 6620599 | 7176282 | 1315369 | solute carrier family 26 (sulfate transporter), member 2 | Slc26a2  | 117267 | 1,18 | down |
| 6648705 | 7176282 | 1315368 | solute carrier family 26 (sulfate transporter), member 2 | Slc26a2  | 117267 | 1,07 | up   |
| 6680189 | 7176282 | 1315369 | solute carrier family 26 (sulfate transporter), member 2 | Slc26a2  | 117267 | 1,12 | down |
| 6742906 | 7176282 | 1315369 | solute carrier family 26 (sulfate transporter), member 2 | Slc26a2  | 117267 | 1,18 | up   |
| 5646789 | 7221187 | 1425708 | solute carrier family 26, member 8                       | Slc26a8  | 309646 | 1,84 | down |
| 5745336 | 7221187 | 1425702 | solute carrier family 26, member 8                       | Slc26a8  | 309646 | 1,05 | down |
| 5746561 | 7221187 | 1425711 | solute carrier family 26, member 8                       | Slc26a8  | 309646 | 1,07 | up   |
| 6000799 | 7221187 | 1425718 | solute carrier family 26, member 8                       | Slc26a8  | 309646 | 1,02 | up   |
| 6004875 | 7221187 | 1425721 | solute carrier family 26, member 8                       | Slc26a8  | 309646 | 1,09 | up   |
| 6021319 | 7221187 | 1425702 | solute carrier family 26, member 8                       | Slc26a8  | 309646 | 1,28 | down |
| 6037047 | 7221187 | 1425709 | solute carrier family 26, member 8                       | Slc26a8  | 309646 | 1,16 | down |
| 6252327 | 7221187 | 1425710 | solute carrier family 26, member 8                       | Slc26a8  | 309646 | 1,29 | up   |
| 6273254 | 7221187 | 1425706 | solute carrier family 26, member 8                       | Slc26a8  | 309646 | 1,26 | up   |
| 6348202 | 7221187 | 1425717 | solute carrier family 26, member 8                       | Slc26a8  | 309646 | 1,20 | down |
| 6379978 | 7221187 | 1425719 | solute carrier family 26, member 8                       | Slc26a8  | 309646 | 1,12 | down |
| 6399397 | 7221187 | 1425715 | solute carrier family 26, member 8                       | Slc26a8  | 309646 | 1,12 | down |
| 6424012 | 7221187 | 1425702 | solute carrier family 26, member 8                       | Slc26a8  | 309646 | 1,19 | down |
| 6431900 | 7221187 | 1425702 | solute carrier family 26, member 8                       | Slc26a8  | 309646 | 2,42 | down |
| 6465505 | 7221187 | 1425716 | solute carrier family 26, member 8                       | Slc26a8  | 309646 | 1,12 | up   |
| 6519344 | 7221187 | 1425712 | solute carrier family 26, member 8                       | Slc26a8  | 309646 | 1,30 | up   |
| 6534430 | 7221187 | 1425705 | solute carrier family 26, member 8                       | Slc26a8  | 309646 | 1,16 | up   |
| 6610391 | 7221187 | 1425704 | solute carrier family 26, member 8                       | Slc26a8  | 309646 | 1,13 | down |
| 6678315 | 7221187 | 1425713 | solute carrier family 26, member 8                       | Slc26a8  | 309646 | 2,14 | down |
| 6686417 | 7221187 | 1425714 | solute carrier family 26, member 8                       | Slc26a8  | 309646 | 1,44 | down |
| 6696985 | 7221187 | 1425703 | solute carrier family 26, member 8                       | Slc26a8  | 309646 | 1,60 | up   |

|         |         |         |                                                             |         |        |      |      |
|---------|---------|---------|-------------------------------------------------------------|---------|--------|------|------|
| 6746951 | 7221187 | 1425707 | solute carrier family 26, member 8                          | Slc26a8 | 309646 | 1,40 | up   |
| 5642552 | 7104920 | 1140067 | solute carrier family 26, member 9                          | Slc26a9 | 304784 | 1,23 | up   |
| 5757934 | 7104920 | 1140070 | solute carrier family 26, member 9                          | Slc26a9 | 304784 | 2,01 | up   |
| 5759924 | 7104920 | 1140042 | solute carrier family 26, member 9                          | Slc26a9 | 304784 | 1,60 | down |
| 5760024 | 7104920 | 1140055 | solute carrier family 26, member 9                          | Slc26a9 | 304784 | 1,26 | down |
| 5783601 | 7104920 | 1140070 | solute carrier family 26, member 9                          | Slc26a9 | 304784 | 1,88 | up   |
| 5893299 | 7104920 | 1140058 | solute carrier family 26, member 9                          | Slc26a9 | 304784 | 1,08 | up   |
| 6031498 | 7104920 | 1140052 | solute carrier family 26, member 9                          | Slc26a9 | 304784 | 1,00 | down |
| 6068256 | 7104920 | 1140064 | solute carrier family 26, member 9                          | Slc26a9 | 304784 | 1,11 | down |
| 6077080 | 7104920 | 1140061 | solute carrier family 26, member 9                          | Slc26a9 | 304784 | 1,13 | up   |
| 6273113 | 7104920 | 1140068 | solute carrier family 26, member 9                          | Slc26a9 | 304784 | 1,33 | up   |
| 6301592 | 7104920 | 1140057 | solute carrier family 26, member 9                          | Slc26a9 | 304784 | 1,22 | down |
| 6346936 | 7104920 | 1140070 | solute carrier family 26, member 9                          | Slc26a9 | 304784 | 1,16 | down |
| 6348390 | 7104920 | 1140069 | solute carrier family 26, member 9                          | Slc26a9 | 304784 | 1,02 | down |
| 6375653 | 7104920 | 1140060 | solute carrier family 26, member 9                          | Slc26a9 | 304784 | 1,31 | down |
| 6452214 | 7104920 | 1140059 | solute carrier family 26, member 9                          | Slc26a9 | 304784 | 1,51 | up   |
| 6475087 | 7104920 | 1140062 | solute carrier family 26, member 9                          | Slc26a9 | 304784 | 1,10 | up   |
| 6478703 | 7104920 | 1140056 | solute carrier family 26, member 9                          | Slc26a9 | 304784 | 1,14 | up   |
| 6485108 | 7104920 | 1140070 | solute carrier family 26, member 9                          | Slc26a9 | 304784 | 1,14 | down |
| 6515415 | 7104920 | 1140048 | solute carrier family 26, member 9                          | Slc26a9 | 304784 | 1,11 | up   |
| 6554785 | 7104920 | 1140065 | solute carrier family 26, member 9                          | Slc26a9 | 304784 | 1,24 | up   |
| 6569712 | 7104920 | 1140063 | solute carrier family 26, member 9                          | Slc26a9 | 304784 | 1,38 | up   |
| 6617741 | 7104920 | 1140054 | solute carrier family 26, member 9                          | Slc26a9 | 304784 | 1,04 | up   |
| 6623449 | 7104920 | 1140066 | solute carrier family 26, member 9                          | Slc26a9 | 304784 | 1,11 | down |
| 6746493 | 7104920 | 1140053 | solute carrier family 26, member 9                          | Slc26a9 | 304784 | 1,16 | up   |
| 5893395 | 7232221 | 1453279 | solute carrier family 27 (fatty acid transporter), member 2 | Slc27a2 | 65192  | 1,05 | down |
| 5912029 | 7232221 | 1453280 | solute carrier family 27 (fatty acid transporter), member 2 | Slc27a2 | 65192  | 1,00 | down |
| 5937539 | 7232221 | 1453280 | solute carrier family 27 (fatty acid transporter), member 2 | Slc27a2 | 65192  | 1,01 | down |
| 5960743 | 7232221 | 1453279 | solute carrier family 27 (fatty acid transporter), member 2 | Slc27a2 | 65192  | 2,04 | down |
| 5981458 | 7232221 | 1453281 | solute carrier family 27 (fatty acid transporter), member 2 | Slc27a2 | 65192  | 1,10 | up   |
| 6063459 | 7232221 | 1453279 | solute carrier family 27 (fatty acid transporter), member 2 | Slc27a2 | 65192  | 1,18 | up   |
| 6122912 | 7232221 | 1453288 | solute carrier family 27 (fatty acid transporter), member 2 | Slc27a2 | 65192  | 1,03 | down |
| 6187814 | 7232221 | 1453285 | solute carrier family 27 (fatty acid transporter), member 2 | Slc27a2 | 65192  | 1,00 | down |
| 6334022 | 7232221 | 1453283 | solute carrier family 27 (fatty acid transporter), member 2 | Slc27a2 | 65192  | 1,24 | up   |
| 6397533 | 7232221 | 1453284 | solute carrier family 27 (fatty acid transporter), member 2 | Slc27a2 | 65192  | 1,11 | up   |
| 6445054 | 7232221 | 1453279 | solute carrier family 27 (fatty acid transporter), member 2 | Slc27a2 | 65192  | 1,89 | down |
| 6500439 | 7232221 | 1453279 | solute carrier family 27 (fatty acid transporter), member 2 | Slc27a2 | 65192  | 1,05 | up   |
| 6665966 | 7232221 | 1453287 | solute carrier family 27 (fatty acid transporter), member 2 | Slc27a2 | 65192  | 1,24 | up   |
| 6693795 | 7232221 | 1453282 | solute carrier family 27 (fatty acid transporter), member 2 | Slc27a2 | 65192  | 1,27 | down |
| 6728147 | 7232221 | 1453279 | solute carrier family 27 (fatty acid transporter), member 2 | Slc27a2 | 65192  | 1,04 | up   |
| 6730406 | 7232221 | 1453286 | solute carrier family 27 (fatty acid transporter), member 2 | Slc27a2 | 65192  | 1,01 | down |
| 5647751 | 7170832 | 1301806 | solute carrier family 27 (fatty acid transporter), member 6 | Slc27a6 | 291582 | 1,14 | down |
| 5673962 | 7170832 | 1301802 | solute carrier family 27 (fatty acid transporter), member 6 | Slc27a6 | 291582 | 1,04 | up   |
| 5831649 | 7170832 | 1301809 | solute carrier family 27 (fatty acid transporter), member 6 | Slc27a6 | 291582 | 1,01 | up   |
| 5871088 | 7170832 | 1301800 | solute carrier family 27 (fatty acid transporter), member 6 | Slc27a6 | 291582 | 1,38 | down |
| 5918498 | 7170832 | 1301798 | solute carrier family 27 (fatty acid transporter), member 6 | Slc27a6 | 291582 | 1,45 | up   |
| 5986483 | 7170832 | 1301804 | solute carrier family 27 (fatty acid transporter), member 6 | Slc27a6 | 291582 | 1,02 | down |
| 5993283 | 7170832 | 1301807 | solute carrier family 27 (fatty acid transporter), member 6 | Slc27a6 | 291582 | 1,12 | down |
| 6171252 | 7170832 | 1301810 | solute carrier family 27 (fatty acid transporter), member 6 | Slc27a6 | 291582 | 1,03 | up   |
| 6201420 | 7170832 | 1301800 | solute carrier family 27 (fatty acid transporter), member 6 | Slc27a6 | 291582 | 1,48 | up   |
| 6231529 | 7170832 | 1301803 | solute carrier family 27 (fatty acid transporter), member 6 | Slc27a6 | 291582 | 1,19 | down |
| 6297239 | 7170832 | 1301808 | solute carrier family 27 (fatty acid transporter), member 6 | Slc27a6 | 291582 | 1,10 | up   |
| 6379618 | 7170832 | 1301798 | solute carrier family 27 (fatty acid transporter), member 6 | Slc27a6 | 291582 | 1,17 | up   |
| 6407578 | 7170832 | 1301798 | solute carrier family 27 (fatty acid transporter), member 6 | Slc27a6 | 291582 | 2,41 | down |
| 6628948 | 7170832 | 1301805 | solute carrier family 27 (fatty acid transporter), member 6 | Slc27a6 | 291582 | 1,13 | up   |
| 5708658 | 7125348 | 1190088 | solute carrier family 30 (zinc transporter), member 9       | Slc30a9 | 498358 | 1,09 | down |

|         |         |         |                                                                  |         |        |      |      |
|---------|---------|---------|------------------------------------------------------------------|---------|--------|------|------|
| 5722313 | 7125348 | 1190079 | solute carrier family 30 (zinc transporter), member 9            | Slc30a9 | 498358 | 1,03 | down |
| 5796508 | 7125348 | 1190091 | solute carrier family 30 (zinc transporter), member 9            | Slc30a9 | 498358 | 1,25 | up   |
| 5840832 | 7125348 | 1190078 | solute carrier family 30 (zinc transporter), member 9            | Slc30a9 | 498358 | 1,21 | down |
| 6017068 | 7125348 | 1190100 | solute carrier family 30 (zinc transporter), member 9            | Slc30a9 | 498358 | 1,44 | up   |
| 6044611 | 7125348 | 1190079 | solute carrier family 30 (zinc transporter), member 9            | Slc30a9 | 498358 | 1,52 | down |
| 6172780 | 7125348 | 1190086 | solute carrier family 30 (zinc transporter), member 9            | Slc30a9 | 498358 | 1,34 | down |
| 6216309 | 7125348 | 1190077 | solute carrier family 30 (zinc transporter), member 9            | Slc30a9 | 498358 | 1,60 | down |
| 6276550 | 7125348 | 1190100 | solute carrier family 30 (zinc transporter), member 9            | Slc30a9 | 498358 | 1,19 | up   |
| 6290113 | 7125348 | 1190085 | solute carrier family 30 (zinc transporter), member 9            | Slc30a9 | 498358 | 1,12 | down |
| 6295316 | 7125348 | 1190081 | solute carrier family 30 (zinc transporter), member 9            | Slc30a9 | 498358 | 1,43 | down |
| 6296646 | 7125348 | 1190076 | solute carrier family 30 (zinc transporter), member 9            | Slc30a9 | 498358 | 1,47 | down |
| 6297114 | 7125348 | 1190084 | solute carrier family 30 (zinc transporter), member 9            | Slc30a9 | 498358 | 1,20 | up   |
| 6304856 | 7125348 | 1190082 | solute carrier family 30 (zinc transporter), member 9            | Slc30a9 | 498358 | 1,68 | down |
| 6309017 | 7125348 | 1190080 | solute carrier family 30 (zinc transporter), member 9            | Slc30a9 | 498358 | 1,17 | down |
| 6399237 | 7125348 | 1190090 | solute carrier family 30 (zinc transporter), member 9            | Slc30a9 | 498358 | 1,29 | up   |
| 6489830 | 7125348 | 1190095 | solute carrier family 30 (zinc transporter), member 9            | Slc30a9 | 498358 | 1,25 | up   |
| 6541467 | 7125348 | 1190079 | solute carrier family 30 (zinc transporter), member 9            | Slc30a9 | 498358 | 1,12 | down |
| 6574552 | 7125348 | 1190092 | solute carrier family 30 (zinc transporter), member 9            | Slc30a9 | 498358 | 1,12 | up   |
| 6577143 | 7125348 | 1190089 | solute carrier family 30 (zinc transporter), member 9            | Slc30a9 | 498358 | 1,17 | down |
| 6577278 | 7125348 | 1190083 | solute carrier family 30 (zinc transporter), member 9            | Slc30a9 | 498358 | 1,15 | up   |
| 5657590 | 7275718 | 1561758 | solute carrier family 31 (copper transporters), member 2         | Slc31a2 | 298091 | 2,23 | up   |
| 6199036 | 7275718 | 1561762 | solute carrier family 31 (copper transporters), member 2         | Slc31a2 | 298091 | 1,14 | down |
| 6374141 | 7275718 | 1561760 | solute carrier family 31 (copper transporters), member 2         | Slc31a2 | 298091 | 1,70 | down |
| 6502896 | 7275718 | 1561761 | solute carrier family 31 (copper transporters), member 2         | Slc31a2 | 298091 | 1,16 | up   |
| 6665482 | 7275718 | 1561762 | solute carrier family 31 (copper transporters), member 2         | Slc31a2 | 298091 | 1,34 | down |
| 6744938 | 7275718 | 1561761 | solute carrier family 31 (copper transporters), member 2         | Slc31a2 | 298091 | 1,14 | down |
| 6095104 | 7169439 | 1298146 | solute carrier family 35, member A4                              | Slc35a4 | 257647 | 1,18 | down |
| 6120960 | 7169439 | 1298147 | solute carrier family 35, member A4                              | Slc35a4 | 257647 | 1,15 | up   |
| 6190270 | 7169439 | 1298145 | solute carrier family 35, member A4                              | Slc35a4 | 257647 | 2,32 | up   |
| 6345756 | 7169439 | 1298146 | solute carrier family 35, member A4                              | Slc35a4 | 257647 | 1,23 | up   |
| 6365171 | 7169439 | 1298147 | solute carrier family 35, member A4                              | Slc35a4 | 257647 | 1,15 | down |
| 6574545 | 7169439 | 1298148 | solute carrier family 35, member A4                              | Slc35a4 | 257647 | 1,00 | up   |
| 6683487 | 7169439 | 1298146 | solute carrier family 35, member A4                              | Slc35a4 | 257647 | 1,32 | up   |
| 6709750 | 7169439 | 1298146 | solute carrier family 35, member A4                              | Slc35a4 | 257647 | 1,23 | up   |
| 5634447 | 7077571 | 1074330 | solute carrier family 36 (proton/amino acid symporter), member 2 | Slc36a2 | 246235 | 1,38 | down |
| 5662549 | 7077571 | 1074336 | solute carrier family 36 (proton/amino acid symporter), member 2 | Slc36a2 | 246235 | 1,09 | up   |
| 5783791 | 7077571 | 1074329 | solute carrier family 36 (proton/amino acid symporter), member 2 | Slc36a2 | 246235 | 1,61 | up   |
| 5809295 | 7077571 | 1074329 | solute carrier family 36 (proton/amino acid symporter), member 2 | Slc36a2 | 246235 | 1,12 | up   |
| 5887635 | 7077571 | 1074334 | solute carrier family 36 (proton/amino acid symporter), member 2 | Slc36a2 | 246235 | 1,02 | up   |
| 5892596 | 7077571 | 1074328 | solute carrier family 36 (proton/amino acid symporter), member 2 | Slc36a2 | 246235 | 1,22 | up   |
| 5997871 | 7077571 | 1074333 | solute carrier family 36 (proton/amino acid symporter), member 2 | Slc36a2 | 246235 | 1,35 | down |
| 6041791 | 7077571 | 1074328 | solute carrier family 36 (proton/amino acid symporter), member 2 | Slc36a2 | 246235 | 1,37 | up   |
| 6060236 | 7077571 | 1074331 | solute carrier family 36 (proton/amino acid symporter), member 2 | Slc36a2 | 246235 | 1,02 | down |
| 6089924 | 7077571 | 1074338 | solute carrier family 36 (proton/amino acid symporter), member 2 | Slc36a2 | 246235 | 1,35 | down |
| 6188296 | 7077571 | 1074331 | solute carrier family 36 (proton/amino acid symporter), member 2 | Slc36a2 | 246235 | 1,28 | down |
| 6199433 | 7077571 | 1074337 | solute carrier family 36 (proton/amino acid symporter), member 2 | Slc36a2 | 246235 | 2,03 | down |
| 6231738 | 7077571 | 1074335 | solute carrier family 36 (proton/amino acid symporter), member 2 | Slc36a2 | 246235 | 1,14 | up   |
| 6232500 | 7077571 | 1074329 | solute carrier family 36 (proton/amino acid symporter), member 2 | Slc36a2 | 246235 | 1,33 | up   |
| 6532627 | 7077571 | 1074332 | solute carrier family 36 (proton/amino acid symporter), member 2 | Slc36a2 | 246235 | 1,01 | down |
| 6573110 | 7077571 | 1074328 | solute carrier family 36 (proton/amino acid symporter), member 2 | Slc36a2 | 246235 | 1,05 | down |
| 6632240 | 7077571 | 1074328 | solute carrier family 36 (proton/amino acid symporter), member 2 | Slc36a2 | 246235 | 1,08 | up   |
| 6679248 | 7077571 | 1074329 | solute carrier family 36 (proton/amino acid symporter), member 2 | Slc36a2 | 246235 | 1,55 | up   |
| 5738516 | 7333152 | 1702962 | solute carrier family 36 (proton/amino acid symporter), member 4 | Slc36a4 | 315439 | 1,29 | down |
| 5832188 | 7333152 | 1702972 | solute carrier family 36 (proton/amino acid symporter), member 4 | Slc36a4 | 315439 | 1,01 | up   |
| 5900972 | 7333152 | 1702969 | solute carrier family 36 (proton/amino acid symporter), member 4 | Slc36a4 | 315439 | 1,05 | down |
| 5907327 | 7333152 | 1702967 | solute carrier family 36 (proton/amino acid symporter), member 4 | Slc36a4 | 315439 | 1,33 | down |



|         |         |         |                                                                      |         |        |      |      |
|---------|---------|---------|----------------------------------------------------------------------|---------|--------|------|------|
| 5947110 | 7333152 | 1702964 | solute carrier family 36 (proton/amino acid symporter), member 4     | Slc36a4 | 315439 | 1,11 | down |
| 5947230 | 7333152 | 1702962 | solute carrier family 36 (proton/amino acid symporter), member 4     | Slc36a4 | 315439 | 1,46 | down |
| 5975479 | 7333152 | 1702966 | solute carrier family 36 (proton/amino acid symporter), member 4     | Slc36a4 | 315439 | 1,77 | down |
| 5995760 | 7333152 | 1702971 | solute carrier family 36 (proton/amino acid symporter), member 4     | Slc36a4 | 315439 | 1,02 | down |
| 6205670 | 7333152 | 1702954 | solute carrier family 36 (proton/amino acid symporter), member 4     | Slc36a4 | 315439 | 1,21 | up   |
| 6279855 | 7333152 | 1702960 | solute carrier family 36 (proton/amino acid symporter), member 4     | Slc36a4 | 315439 | 1,80 | up   |
| 6357783 | 7333152 | 1702963 | solute carrier family 36 (proton/amino acid symporter), member 4     | Slc36a4 | 315439 | 1,02 | up   |
| 6495936 | 7333152 | 1702961 | solute carrier family 36 (proton/amino acid symporter), member 4     | Slc36a4 | 315439 | 1,06 | down |
| 6599744 | 7333152 | 1702970 | solute carrier family 36 (proton/amino acid symporter), member 4     | Slc36a4 | 315439 | 1,15 | down |
| 6627481 | 7333152 | 1702966 | solute carrier family 36 (proton/amino acid symporter), member 4     | Slc36a4 | 315439 | 1,14 | down |
| 6629676 | 7333152 | 1702970 | solute carrier family 36 (proton/amino acid symporter), member 4     | Slc36a4 | 315439 | 1,23 | up   |
| 6632181 | 7333152 | 1702968 | solute carrier family 36 (proton/amino acid symporter), member 4     | Slc36a4 | 315439 | 1,29 | up   |
| 6729575 | 7333152 | 1702973 | solute carrier family 36 (proton/amino acid symporter), member 4     | Slc36a4 | 315439 | 1,09 | up   |
| 5711600 | 7335481 | 1708244 | solute carrier family 37 (glucose-6-phosphate transporter), member 4 | Slc37a4 | 29573  | 1,43 | up   |
| 5740128 | 7335481 | 1708239 | solute carrier family 37 (glucose-6-phosphate transporter), member 4 | Slc37a4 | 29573  | 2,49 | up   |
| 5829918 | 7335481 | 1708243 | solute carrier family 37 (glucose-6-phosphate transporter), member 4 | Slc37a4 | 29573  | 1,12 | up   |
| 5831404 | 7335481 | 1708246 | solute carrier family 37 (glucose-6-phosphate transporter), member 4 | Slc37a4 | 29573  | 1,03 | down |
| 5858301 | 7335481 | 1708240 | solute carrier family 37 (glucose-6-phosphate transporter), member 4 | Slc37a4 | 29573  | 1,57 | up   |
| 6205509 | 7335481 | 1708245 | solute carrier family 37 (glucose-6-phosphate transporter), member 4 | Slc37a4 | 29573  | 1,07 | down |
| 6421438 | 7335481 | 1708242 | solute carrier family 37 (glucose-6-phosphate transporter), member 4 | Slc37a4 | 29573  | 1,15 | down |
| 6473840 | 7335481 | 1708247 | solute carrier family 37 (glucose-6-phosphate transporter), member 4 | Slc37a4 | 29573  | 1,46 | down |
| 6608265 | 7335481 | 1708240 | solute carrier family 37 (glucose-6-phosphate transporter), member 4 | Slc37a4 | 29573  | 1,17 | up   |
| 6626207 | 7335481 | 1708241 | solute carrier family 37 (glucose-6-phosphate transporter), member 4 | Slc37a4 | 29573  | 1,05 | up   |
| 6721008 | 7335481 | 1708248 | solute carrier family 37 (glucose-6-phosphate transporter), member 4 | Slc37a4 | 29573  | 1,53 | up   |
| 5664071 | 7349935 | 1744882 | solute carrier family 38, member 3                                   | Slc38a3 | 252919 | 1,56 | up   |
| 5685296 | 7349935 | 1744880 | solute carrier family 38, member 3                                   | Slc38a3 | 252919 | 2,27 | up   |
| 5719840 | 7349935 | 1744881 | solute carrier family 38, member 3                                   | Slc38a3 | 252919 | 1,46 | up   |
| 5767370 | 7349935 | 1744867 | solute carrier family 38, member 3                                   | Slc38a3 | 252919 | 1,12 | up   |
| 5791509 | 7349935 | 1744869 | solute carrier family 38, member 3                                   | Slc38a3 | 252919 | 1,09 | down |
| 5855558 | 7349935 | 1744871 | solute carrier family 38, member 3                                   | Slc38a3 | 252919 | 1,30 | down |
| 5885525 | 7349935 | 1744866 | solute carrier family 38, member 3                                   | Slc38a3 | 252919 | 1,21 | up   |
| 5965221 | 7349935 | 1744877 | solute carrier family 38, member 3                                   | Slc38a3 | 252919 | 1,19 | down |
| 6074391 | 7349935 | 1744874 | solute carrier family 38, member 3                                   | Slc38a3 | 252919 | 1,27 | down |
| 6154612 | 7349935 | 1744865 | solute carrier family 38, member 3                                   | Slc38a3 | 252919 | 2,12 | up   |
| 6201700 | 7349935 | 1744872 | solute carrier family 38, member 3                                   | Slc38a3 | 252919 | 1,20 | up   |
| 6223733 | 7349935 | 1744875 | solute carrier family 38, member 3                                   | Slc38a3 | 252919 | 1,04 | down |
| 6262105 | 7349935 | 1744868 | solute carrier family 38, member 3                                   | Slc38a3 | 252919 | 1,07 | up   |
| 6279209 | 7349935 | 1744876 | solute carrier family 38, member 3                                   | Slc38a3 | 252919 | 1,15 | down |
| 6472916 | 7349935 | 1744878 | solute carrier family 38, member 3                                   | Slc38a3 | 252919 | 1,11 | up   |
| 6522923 | 7349935 | 1744875 | solute carrier family 38, member 3                                   | Slc38a3 | 252919 | 1,28 | down |
| 6586039 | 7349935 | 1744870 | solute carrier family 38, member 3                                   | Slc38a3 | 252919 | 1,36 | down |
| 6601227 | 7349935 | 1744879 | solute carrier family 38, member 3                                   | Slc38a3 | 252919 | 2,38 | up   |
| 6679443 | 7349935 | 1744873 | solute carrier family 38, member 3                                   | Slc38a3 | 252919 | 1,24 | up   |
| 5691662 | 7379840 | 1820445 | solute carrier family 38, member 5                                   | Slc38a5 | 192208 | 1,04 | down |
| 5712700 | 7379840 | 1820447 | solute carrier family 38, member 5                                   | Slc38a5 | 192208 | 1,35 | up   |
| 5797129 | 7379840 | 1820442 | solute carrier family 38, member 5                                   | Slc38a5 | 192208 | 1,01 | up   |
| 5809624 | 7379840 | 1820450 | solute carrier family 38, member 5                                   | Slc38a5 | 192208 | 1,37 | up   |
| 5893373 | 7379840 | 1820441 | solute carrier family 38, member 5                                   | Slc38a5 | 192208 | 1,01 | down |
| 5894701 | 7379840 | 1820449 | solute carrier family 38, member 5                                   | Slc38a5 | 192208 | 1,32 | down |
| 5976239 | 7379840 | 1820440 | solute carrier family 38, member 5                                   | Slc38a5 | 192208 | 1,14 | down |
| 5987273 | 7379840 | 1820447 | solute carrier family 38, member 5                                   | Slc38a5 | 192208 | 1,18 | down |
| 5998426 | 7379840 | 1820446 | solute carrier family 38, member 5                                   | Slc38a5 | 192208 | 1,23 | up   |
| 6121905 | 7379840 | 1820454 | solute carrier family 38, member 5                                   | Slc38a5 | 192208 | 2,79 | up   |
| 6239074 | 7379840 | 1820439 | solute carrier family 38, member 5                                   | Slc38a5 | 192208 | 1,37 | down |
| 6241788 | 7379840 | 1820448 | solute carrier family 38, member 5                                   | Slc38a5 | 192208 | 1,42 | up   |
| 6290394 | 7379840 | 1820443 | solute carrier family 38, member 5                                   | Slc38a5 | 192208 | 1,52 | up   |

|         |         |         |                                                            |         |        |      |      |
|---------|---------|---------|------------------------------------------------------------|---------|--------|------|------|
| 6446744 | 7379840 | 1820444 | solute carrier family 38, member 5                         | Slc38a5 | 192208 | 1,39 | down |
| 6456827 | 7379840 | 1820451 | solute carrier family 38, member 5                         | Slc38a5 | 192208 | 1,05 | up   |
| 6642797 | 7379840 | 1820452 | solute carrier family 38, member 5                         | Slc38a5 | 192208 | 1,37 | down |
| 6678957 | 7379840 | 1820453 | solute carrier family 38, member 5                         | Slc38a5 | 192208 | 1,52 | down |
| 6741326 | 7379840 | 1820438 | solute carrier family 38, member 5                         | Slc38a5 | 192208 | 1,07 | down |
| 5618385 | 7189669 | 1348991 | solute carrier family 38, member 9                         | Slc38a9 | 310091 | 1,22 | up   |
| 5618628 | 7189669 | 1348975 | solute carrier family 38, member 9                         | Slc38a9 | 310091 | 1,13 | down |
| 5667073 | 7189669 | 1348982 | solute carrier family 38, member 9                         | Slc38a9 | 310091 | 1,03 | down |
| 5872182 | 7189669 | 1348977 | solute carrier family 38, member 9                         | Slc38a9 | 310091 | 1,39 | up   |
| 5922942 | 7189669 | 1348979 | solute carrier family 38, member 9                         | Slc38a9 | 310091 | 1,34 | up   |
| 5926578 | 7189669 | 1348976 | solute carrier family 38, member 9                         | Slc38a9 | 310091 | 1,03 | down |
| 5983594 | 7189669 | 1348985 | solute carrier family 38, member 9                         | Slc38a9 | 310091 | 1,25 | down |
| 6048261 | 7189669 | 1348984 | solute carrier family 38, member 9                         | Slc38a9 | 310091 | 1,42 | up   |
| 6072665 | 7189669 | 1348992 | solute carrier family 38, member 9                         | Slc38a9 | 310091 | 1,10 | down |
| 6189122 | 7189669 | 1348989 | solute carrier family 38, member 9                         | Slc38a9 | 310091 | 2,20 | up   |
| 6221941 | 7189669 | 1348977 | solute carrier family 38, member 9                         | Slc38a9 | 310091 | 1,27 | down |
| 6225040 | 7189669 | 1348965 | solute carrier family 38, member 9                         | Slc38a9 | 310091 | 2,12 | down |
| 6338582 | 7189669 | 1348978 | solute carrier family 38, member 9                         | Slc38a9 | 310091 | 1,05 | down |
| 6396159 | 7189669 | 1348990 | solute carrier family 38, member 9                         | Slc38a9 | 310091 | 1,19 | up   |
| 6475271 | 7189669 | 1348982 | solute carrier family 38, member 9                         | Slc38a9 | 310091 | 1,24 | up   |
| 6645875 | 7189669 | 1348973 | solute carrier family 38, member 9                         | Slc38a9 | 310091 | 1,29 | up   |
| 5629374 | 7199563 | 1374766 | solute carrier family 39 (metal ion transporter), member 8 | Slc39a8 | 295455 | 1,34 | up   |
| 5635716 | 7199563 | 1374765 | solute carrier family 39 (metal ion transporter), member 8 | Slc39a8 | 295455 | 1,12 | down |
| 5653272 | 7199563 | 1374766 | solute carrier family 39 (metal ion transporter), member 8 | Slc39a8 | 295455 | 1,83 | down |
| 5667425 | 7199563 | 1374758 | solute carrier family 39 (metal ion transporter), member 8 | Slc39a8 | 295455 | 1,15 | up   |
| 5697647 | 7199563 | 1374762 | solute carrier family 39 (metal ion transporter), member 8 | Slc39a8 | 295455 | 1,07 | up   |
| 5918308 | 7199563 | 1374759 | solute carrier family 39 (metal ion transporter), member 8 | Slc39a8 | 295455 | 1,07 | up   |
| 6196231 | 7199563 | 1374764 | solute carrier family 39 (metal ion transporter), member 8 | Slc39a8 | 295455 | 1,03 | up   |
| 6236180 | 7199563 | 1374758 | solute carrier family 39 (metal ion transporter), member 8 | Slc39a8 | 295455 | 2,09 | down |
| 6328080 | 7199563 | 1374763 | solute carrier family 39 (metal ion transporter), member 8 | Slc39a8 | 295455 | 1,11 | down |
| 6595882 | 7199563 | 1374760 | solute carrier family 39 (metal ion transporter), member 8 | Slc39a8 | 295455 | 1,30 | down |
| 6619265 | 7199563 | 1374759 | solute carrier family 39 (metal ion transporter), member 8 | Slc39a8 | 295455 | 1,63 | up   |
| 6678139 | 7199563 | 1374761 | solute carrier family 39 (metal ion transporter), member 8 | Slc39a8 | 295455 | 1,13 | down |
| 6692165 | 7199563 | 1374758 | solute carrier family 39 (metal ion transporter), member 8 | Slc39a8 | 295455 | 1,09 | down |
| 5632423 | 7124093 | 1187184 | solute carrier family 4 (anion exchanger), member 4        | Slc4a4  | 84484  | 1,09 | down |
| 5635222 | 7124093 | 1187167 | solute carrier family 4 (anion exchanger), member 4        | Slc4a4  | 84484  | 1,64 | up   |
| 5671579 | 7124093 | 1187166 | solute carrier family 4 (anion exchanger), member 4        | Slc4a4  | 84484  | 1,06 | up   |
| 5715805 | 7124093 | 1187170 | solute carrier family 4 (anion exchanger), member 4        | Slc4a4  | 84484  | 1,06 | up   |
| 5761583 | 7124093 | 1187180 | solute carrier family 4 (anion exchanger), member 4        | Slc4a4  | 84484  | 1,11 | down |
| 5800961 | 7124093 | 1187178 | solute carrier family 4 (anion exchanger), member 4        | Slc4a4  | 84484  | 1,01 | down |
| 5833187 | 7124093 | 1187163 | solute carrier family 4 (anion exchanger), member 4        | Slc4a4  | 84484  | 1,07 | up   |
| 5842956 | 7124093 | 1187177 | solute carrier family 4 (anion exchanger), member 4        | Slc4a4  | 84484  | 1,16 | up   |
| 5890552 | 7124093 | 1187165 | solute carrier family 4 (anion exchanger), member 4        | Slc4a4  | 84484  | 1,11 | down |
| 5935702 | 7124093 | 1187161 | solute carrier family 4 (anion exchanger), member 4        | Slc4a4  | 84484  | 1,38 | down |
| 5939040 | 7124093 | 1187160 | solute carrier family 4 (anion exchanger), member 4        | Slc4a4  | 84484  | 1,15 | down |
| 5956635 | 7124093 | 1187185 | solute carrier family 4 (anion exchanger), member 4        | Slc4a4  | 84484  | 1,17 | up   |
| 5968068 | 7124093 | 1187182 | solute carrier family 4 (anion exchanger), member 4        | Slc4a4  | 84484  | 1,13 | up   |
| 5991673 | 7124093 | 1187162 | solute carrier family 4 (anion exchanger), member 4        | Slc4a4  | 84484  | 1,47 | down |
| 5999326 | 7124093 | 1187169 | solute carrier family 4 (anion exchanger), member 4        | Slc4a4  | 84484  | 1,16 | up   |
| 6014167 | 7124093 | 1187176 | solute carrier family 4 (anion exchanger), member 4        | Slc4a4  | 84484  | 1,44 | down |
| 6016152 | 7124093 | 1187179 | solute carrier family 4 (anion exchanger), member 4        | Slc4a4  | 84484  | 1,03 | up   |
| 6016245 | 7124093 | 1187168 | solute carrier family 4 (anion exchanger), member 4        | Slc4a4  | 84484  | 1,13 | down |
| 6024994 | 7124093 | 1187183 | solute carrier family 4 (anion exchanger), member 4        | Slc4a4  | 84484  | 1,13 | down |
| 6051527 | 7124093 | 1187161 | solute carrier family 4 (anion exchanger), member 4        | Slc4a4  | 84484  | 1,35 | up   |
| 6074269 | 7124093 | 1187172 | solute carrier family 4 (anion exchanger), member 4        | Slc4a4  | 84484  | 1,02 | up   |
| 6087999 | 7124093 | 1187173 | solute carrier family 4 (anion exchanger), member 4        | Slc4a4  | 84484  | 1,12 | down |

|         |         |         |                                                     |         |        |      |      |
|---------|---------|---------|-----------------------------------------------------|---------|--------|------|------|
| 6124602 | 7124093 | 1187171 | solute carrier family 4 (anion exchanger), member 4 | Slc4a4  | 84484  | 1,25 | down |
| 6125433 | 7124093 | 1187174 | solute carrier family 4 (anion exchanger), member 4 | Slc4a4  | 84484  | 1,01 | up   |
| 6137788 | 7124093 | 1187182 | solute carrier family 4 (anion exchanger), member 4 | Slc4a4  | 84484  | 1,78 | down |
| 6305046 | 7124093 | 1187164 | solute carrier family 4 (anion exchanger), member 4 | Slc4a4  | 84484  | 1,19 | up   |
| 6486808 | 7124093 | 1187181 | solute carrier family 4 (anion exchanger), member 4 | Slc4a4  | 84484  | 1,26 | up   |
| 6503917 | 7124093 | 1187163 | solute carrier family 4 (anion exchanger), member 4 | Slc4a4  | 84484  | 1,15 | up   |
| 6659236 | 7124093 | 1187176 | solute carrier family 4 (anion exchanger), member 4 | Slc4a4  | 84484  | 1,08 | down |
| 6700294 | 7124093 | 1187163 | solute carrier family 4 (anion exchanger), member 4 | Slc4a4  | 84484  | 2,01 | down |
| 6745068 | 7124093 | 1187175 | solute carrier family 4 (anion exchanger), member 4 | Slc4a4  | 84484  | 1,12 | down |
| 5618735 | 7320812 | 1674326 | solute carrier family 4 (anion exchanger), member 8 | Slc4a8  | 315311 | 1,37 | down |
| 5656932 | 7320812 | 1674327 | solute carrier family 4 (anion exchanger), member 8 | Slc4a8  | 315311 | 1,04 | down |
| 5676888 | 7320812 | 1674340 | solute carrier family 4 (anion exchanger), member 8 | Slc4a8  | 315311 | 1,06 | up   |
| 5726123 | 7320812 | 1674341 | solute carrier family 4 (anion exchanger), member 8 | Slc4a8  | 315311 | 1,98 | up   |
| 5759120 | 7320812 | 1674347 | solute carrier family 4 (anion exchanger), member 8 | Slc4a8  | 315311 | 1,05 | down |
| 5787414 | 7320812 | 1674339 | solute carrier family 4 (anion exchanger), member 8 | Slc4a8  | 315311 | 1,11 | up   |
| 5821043 | 7320812 | 1674333 | solute carrier family 4 (anion exchanger), member 8 | Slc4a8  | 315311 | 1,08 | down |
| 5882755 | 7320812 | 1674344 | solute carrier family 4 (anion exchanger), member 8 | Slc4a8  | 315311 | 1,13 | down |
| 5892518 | 7320812 | 1674334 | solute carrier family 4 (anion exchanger), member 8 | Slc4a8  | 315311 | 1,07 | down |
| 5959700 | 7320812 | 1674328 | solute carrier family 4 (anion exchanger), member 8 | Slc4a8  | 315311 | 1,24 | down |
| 5977905 | 7320812 | 1674326 | solute carrier family 4 (anion exchanger), member 8 | Slc4a8  | 315311 | 1,12 | up   |
| 5980972 | 7320812 | 1674336 | solute carrier family 4 (anion exchanger), member 8 | Slc4a8  | 315311 | 2,10 | up   |
| 6030369 | 7320812 | 1674337 | solute carrier family 4 (anion exchanger), member 8 | Slc4a8  | 315311 | 1,18 | down |
| 6119347 | 7320812 | 1674346 | solute carrier family 4 (anion exchanger), member 8 | Slc4a8  | 315311 | 1,20 | up   |
| 6198411 | 7320812 | 1674342 | solute carrier family 4 (anion exchanger), member 8 | Slc4a8  | 315311 | 1,75 | up   |
| 6315753 | 7320812 | 1674332 | solute carrier family 4 (anion exchanger), member 8 | Slc4a8  | 315311 | 1,13 | down |
| 6435566 | 7320812 | 1674343 | solute carrier family 4 (anion exchanger), member 8 | Slc4a8  | 315311 | 1,27 | up   |
| 6456635 | 7320812 | 1674331 | solute carrier family 4 (anion exchanger), member 8 | Slc4a8  | 315311 | 1,24 | down |
| 6464659 | 7320812 | 1674329 | solute carrier family 4 (anion exchanger), member 8 | Slc4a8  | 315311 | 1,01 | down |
| 6521389 | 7320812 | 1674338 | solute carrier family 4 (anion exchanger), member 8 | Slc4a8  | 315311 | 1,23 | down |
| 6522066 | 7320812 | 1674335 | solute carrier family 4 (anion exchanger), member 8 | Slc4a8  | 315311 | 1,46 | down |
| 6576572 | 7320812 | 1674345 | solute carrier family 4 (anion exchanger), member 8 | Slc4a8  | 315311 | 1,06 | down |
| 6627134 | 7320812 | 1674336 | solute carrier family 4 (anion exchanger), member 8 | Slc4a8  | 315311 | 1,03 | down |
| 6659705 | 7320812 | 1674331 | solute carrier family 4 (anion exchanger), member 8 | Slc4a8  | 315311 | 1,25 | up   |
| 6711225 | 7320812 | 1674330 | solute carrier family 4 (anion exchanger), member 8 | Slc4a8  | 315311 | 1,35 | down |
| 5690521 | 7220663 | 1424570 | solute carrier family 44, member 4                  | Slc44a4 | 294255 | 1,64 | down |
| 5693497 | 7220663 | 1424590 | solute carrier family 44, member 4                  | Slc44a4 | 294255 | 1,06 | down |
| 5713032 | 7220663 | 1424581 | solute carrier family 44, member 4                  | Slc44a4 | 294255 | 1,50 | up   |
| 5789495 | 7220663 | 1424579 | solute carrier family 44, member 4                  | Slc44a4 | 294255 | 1,45 | up   |
| 5823653 | 7220663 | 1424580 | solute carrier family 44, member 4                  | Slc44a4 | 294255 | 1,98 | up   |
| 5905192 | 7220663 | 1424585 | solute carrier family 44, member 4                  | Slc44a4 | 294255 | 1,46 | down |
| 5941704 | 7220663 | 1424576 | solute carrier family 44, member 4                  | Slc44a4 | 294255 | 1,37 | down |
| 6007895 | 7220663 | 1424591 | solute carrier family 44, member 4                  | Slc44a4 | 294255 | 2,29 | down |
| 6163452 | 7220663 | 1424583 | solute carrier family 44, member 4                  | Slc44a4 | 294255 | 1,11 | up   |
| 6222094 | 7220663 | 1424584 | solute carrier family 44, member 4                  | Slc44a4 | 294255 | 1,22 | up   |
| 6233802 | 7220663 | 1424578 | solute carrier family 44, member 4                  | Slc44a4 | 294255 | 1,17 | down |
| 6267026 | 7220663 | 1424577 | solute carrier family 44, member 4                  | Slc44a4 | 294255 | 1,07 | up   |
| 6273167 | 7220663 | 1424587 | solute carrier family 44, member 4                  | Slc44a4 | 294255 | 1,24 | up   |
| 6293290 | 7220663 | 1424571 | solute carrier family 44, member 4                  | Slc44a4 | 294255 | 1,56 | down |
| 6378927 | 7220663 | 1424578 | solute carrier family 44, member 4                  | Slc44a4 | 294255 | 1,06 | up   |
| 6397930 | 7220663 | 1424586 | solute carrier family 44, member 4                  | Slc44a4 | 294255 | 1,23 | up   |
| 6415721 | 7220663 | 1424574 | solute carrier family 44, member 4                  | Slc44a4 | 294255 | 1,54 | down |
| 6436319 | 7220663 | 1424572 | solute carrier family 44, member 4                  | Slc44a4 | 294255 | 1,46 | down |
| 6469112 | 7220663 | 1424575 | solute carrier family 44, member 4                  | Slc44a4 | 294255 | 1,27 | down |
| 6472999 | 7220663 | 1424579 | solute carrier family 44, member 4                  | Slc44a4 | 294255 | 1,18 | up   |
| 6533635 | 7220663 | 1424582 | solute carrier family 44, member 4                  | Slc44a4 | 294255 | 1,21 | up   |
| 6556236 | 7220663 | 1424580 | solute carrier family 44, member 4                  | Slc44a4 | 294255 | 1,45 | up   |

|         |         |         |                                                                             |         |        |      |      |
|---------|---------|---------|-----------------------------------------------------------------------------|---------|--------|------|------|
| 6580035 | 7220663 | 1424589 | solute carrier family 44, member 4                                          | Slc44a4 | 294255 | 1,10 | down |
| 6672991 | 7220663 | 1424588 | solute carrier family 44, member 4                                          | Slc44a4 | 294255 | 1,32 | up   |
| 6746476 | 7220663 | 1424573 | solute carrier family 44, member 4                                          | Slc44a4 | 294255 | 1,60 | down |
| 5676633 | 7351229 | 1747926 | solute carrier family 6 (neurotransmitter transporter), member 20           | Slc6a20 | 113918 | 1,07 | down |
| 5681009 | 7351229 | 1747919 | solute carrier family 6 (neurotransmitter transporter), member 20           | Slc6a20 | 113918 | 1,01 | up   |
| 5719439 | 7351229 | 1747923 | solute carrier family 6 (neurotransmitter transporter), member 20           | Slc6a20 | 113918 | 1,43 | down |
| 5786989 | 7351229 | 1747926 | solute carrier family 6 (neurotransmitter transporter), member 20           | Slc6a20 | 113918 | 1,10 | up   |
| 5854793 | 7351229 | 1747929 | solute carrier family 6 (neurotransmitter transporter), member 20           | Slc6a20 | 113918 | 1,07 | up   |
| 5890441 | 7351229 | 1747929 | solute carrier family 6 (neurotransmitter transporter), member 20           | Slc6a20 | 113918 | 1,11 | up   |
| 5999585 | 7351229 | 1747920 | solute carrier family 6 (neurotransmitter transporter), member 20           | Slc6a20 | 113918 | 1,01 | up   |
| 6029537 | 7351229 | 1747929 | solute carrier family 6 (neurotransmitter transporter), member 20           | Slc6a20 | 113918 | 1,48 | up   |
| 6049755 | 7351229 | 1747922 | solute carrier family 6 (neurotransmitter transporter), member 20           | Slc6a20 | 113918 | 1,00 | up   |
| 6061736 | 7351229 | 1747921 | solute carrier family 6 (neurotransmitter transporter), member 20           | Slc6a20 | 113918 | 1,08 | down |
| 6105398 | 7351229 | 1747925 | solute carrier family 6 (neurotransmitter transporter), member 20           | Slc6a20 | 113918 | 1,33 | down |
| 6142072 | 7351229 | 1747928 | solute carrier family 6 (neurotransmitter transporter), member 20           | Slc6a20 | 113918 | 1,21 | up   |
| 6249693 | 7351229 | 1747919 | solute carrier family 6 (neurotransmitter transporter), member 20           | Slc6a20 | 113918 | 1,05 | down |
| 6480340 | 7351229 | 1747924 | solute carrier family 6 (neurotransmitter transporter), member 20           | Slc6a20 | 113918 | 1,00 | up   |
| 6587233 | 7351229 | 1747927 | solute carrier family 6 (neurotransmitter transporter), member 20           | Slc6a20 | 113918 | 2,60 | down |
| 5686380 | 7278898 | 1570297 | solute carrier family 6 (neurotransmitter transporter, glycine), member 9   | Slc6a9  | 116509 | 1,30 | down |
| 5741278 | 7278898 | 1570300 | solute carrier family 6 (neurotransmitter transporter, glycine), member 9   | Slc6a9  | 116509 | 1,19 | down |
| 5836225 | 7278898 | 1570305 | solute carrier family 6 (neurotransmitter transporter, glycine), member 9   | Slc6a9  | 116509 | 1,21 | up   |
| 5858399 | 7278898 | 1570303 | solute carrier family 6 (neurotransmitter transporter, glycine), member 9   | Slc6a9  | 116509 | 1,09 | down |
| 5990376 | 7278898 | 1570302 | solute carrier family 6 (neurotransmitter transporter, glycine), member 9   | Slc6a9  | 116509 | 1,05 | down |
| 6008589 | 7278898 | 1570306 | solute carrier family 6 (neurotransmitter transporter, glycine), member 9   | Slc6a9  | 116509 | 1,30 | up   |
| 6080169 | 7278898 | 1570299 | solute carrier family 6 (neurotransmitter transporter, glycine), member 9   | Slc6a9  | 116509 | 1,08 | down |
| 6131288 | 7278898 | 1570307 | solute carrier family 6 (neurotransmitter transporter, glycine), member 9   | Slc6a9  | 116509 | 1,03 | down |
| 6160379 | 7278898 | 1570295 | solute carrier family 6 (neurotransmitter transporter, glycine), member 9   | Slc6a9  | 116509 | 1,67 | down |
| 6164813 | 7278898 | 1570295 | solute carrier family 6 (neurotransmitter transporter, glycine), member 9   | Slc6a9  | 116509 | 1,98 | down |
| 6190122 | 7278898 | 1570308 | solute carrier family 6 (neurotransmitter transporter, glycine), member 9   | Slc6a9  | 116509 | 1,25 | down |
| 6256574 | 7278898 | 1570301 | solute carrier family 6 (neurotransmitter transporter, glycine), member 9   | Slc6a9  | 116509 | 1,12 | up   |
| 6441315 | 7278898 | 1570300 | solute carrier family 6 (neurotransmitter transporter, glycine), member 9   | Slc6a9  | 116509 | 1,09 | up   |
| 6480123 | 7278898 | 1570295 | solute carrier family 6 (neurotransmitter transporter, glycine), member 9   | Slc6a9  | 116509 | 1,52 | down |
| 6556364 | 7278898 | 1570304 | solute carrier family 6 (neurotransmitter transporter, glycine), member 9   | Slc6a9  | 116509 | 1,07 | up   |
| 6602276 | 7278898 | 1570298 | solute carrier family 6 (neurotransmitter transporter, glycine), member 9   | Slc6a9  | 116509 | 1,09 | up   |
| 5671067 | 7176247 | 1315292 | solute carrier family 6 (neurotransmitter transporter, L-proline), member 7 | Slc6a7  | 117100 | 1,01 | up   |
| 5877275 | 7176247 | 1315291 | solute carrier family 6 (neurotransmitter transporter, L-proline), member 7 | Slc6a7  | 117100 | 1,01 | down |
| 5947380 | 7176247 | 1315288 | solute carrier family 6 (neurotransmitter transporter, L-proline), member 7 | Slc6a7  | 117100 | 1,03 | up   |
| 5951928 | 7176247 | 1315285 | solute carrier family 6 (neurotransmitter transporter, L-proline), member 7 | Slc6a7  | 117100 | 1,19 | up   |
| 6063898 | 7176247 | 1315282 | solute carrier family 6 (neurotransmitter transporter, L-proline), member 7 | Slc6a7  | 117100 | 1,04 | up   |
| 6097291 | 7176247 | 1315281 | solute carrier family 6 (neurotransmitter transporter, L-proline), member 7 | Slc6a7  | 117100 | 1,03 | up   |
| 6112606 | 7176247 | 1315287 | solute carrier family 6 (neurotransmitter transporter, L-proline), member 7 | Slc6a7  | 117100 | 1,42 | up   |
| 6223467 | 7176247 | 1315294 | solute carrier family 6 (neurotransmitter transporter, L-proline), member 7 | Slc6a7  | 117100 | 1,20 | up   |
| 6238264 | 7176247 | 1315290 | solute carrier family 6 (neurotransmitter transporter, L-proline), member 7 | Slc6a7  | 117100 | 1,10 | up   |
| 6254310 | 7176247 | 1315280 | solute carrier family 6 (neurotransmitter transporter, L-proline), member 7 | Slc6a7  | 117100 | 1,04 | up   |
| 6275388 | 7176247 | 1315293 | solute carrier family 6 (neurotransmitter transporter, L-proline), member 7 | Slc6a7  | 117100 | 1,54 | up   |
| 6530708 | 7176247 | 1315286 | solute carrier family 6 (neurotransmitter transporter, L-proline), member 7 | Slc6a7  | 117100 | 1,11 | down |
| 6617185 | 7176247 | 1315284 | solute carrier family 6 (neurotransmitter transporter, L-proline), member 7 | Slc6a7  | 117100 | 1,28 | down |
| 6671740 | 7176247 | 1315289 | solute carrier family 6 (neurotransmitter transporter, L-proline), member 7 | Slc6a7  | 117100 | 2,14 | down |
| 6694990 | 7176247 | 1315283 | solute carrier family 6 (neurotransmitter transporter, L-proline), member 7 | Slc6a7  | 117100 | 1,17 | down |
| 5835736 | 7026418 | 952185  | solute carrier family 6, member 18                                          | Slc6a18 | 29323  | 1,11 | up   |
| 5875524 | 7026418 | 952181  | solute carrier family 6, member 18                                          | Slc6a18 | 29323  | 1,05 | up   |
| 5930262 | 7026418 | 952183  | solute carrier family 6, member 18                                          | Slc6a18 | 29323  | 1,09 | down |
| 5948607 | 7026418 | 952182  | solute carrier family 6, member 18                                          | Slc6a18 | 29323  | 1,50 | down |
| 5950939 | 7026418 | 952186  | solute carrier family 6, member 18                                          | Slc6a18 | 29323  | 1,03 | down |
| 5978913 | 7026418 | 952188  | solute carrier family 6, member 18                                          | Slc6a18 | 29323  | 1,11 | down |
| 5987397 | 7026418 | 952189  | solute carrier family 6, member 18                                          | Slc6a18 | 29323  | 2,01 | down |

|         |         |         |                                                                                 |         |        |      |      |
|---------|---------|---------|---------------------------------------------------------------------------------|---------|--------|------|------|
| 6097957 | 7026418 | 952187  | solute carrier family 6, member 18                                              | Slc6a18 | 29323  | 1,25 | down |
| 6181425 | 7026418 | 952180  | solute carrier family 6, member 18                                              | Slc6a18 | 29323  | 1,88 | up   |
| 6231690 | 7026418 | 952181  | solute carrier family 6, member 18                                              | Slc6a18 | 29323  | 1,23 | down |
| 6294906 | 7026418 | 952179  | solute carrier family 6, member 18                                              | Slc6a18 | 29323  | 1,12 | down |
| 6328320 | 7026418 | 952190  | solute carrier family 6, member 18                                              | Slc6a18 | 29323  | 1,96 | down |
| 6465166 | 7026418 | 952187  | solute carrier family 6, member 18                                              | Slc6a18 | 29323  | 1,25 | up   |
| 6539817 | 7026418 | 952188  | solute carrier family 6, member 18                                              | Slc6a18 | 29323  | 1,02 | up   |
| 6581404 | 7026418 | 952190  | solute carrier family 6, member 18                                              | Slc6a18 | 29323  | 1,58 | up   |
| 6712618 | 7026418 | 952184  | solute carrier family 6, member 18                                              | Slc6a18 | 29323  | 1,17 | down |
| 6724759 | 7026418 | 952189  | solute carrier family 6, member 18                                              | Slc6a18 | 29323  | 1,00 | up   |
| 5697029 | 7208330 | 1395093 | solute carrier family 7 (cationic amino acid transporter, y+ system), member 11 | Slc7a11 | 310392 | 1,39 | up   |
| 5719773 | 7208330 | 1395079 | solute carrier family 7 (cationic amino acid transporter, y+ system), member 11 | Slc7a11 | 310392 | 1,58 | down |
| 6097861 | 7208330 | 1395080 | solute carrier family 7 (cationic amino acid transporter, y+ system), member 11 | Slc7a11 | 310392 | 1,00 | down |
| 6122682 | 7208330 | 1395097 | solute carrier family 7 (cationic amino acid transporter, y+ system), member 11 | Slc7a11 | 310392 | 1,08 | down |
| 6211296 | 7208330 | 1395096 | solute carrier family 7 (cationic amino acid transporter, y+ system), member 11 | Slc7a11 | 310392 | 1,27 | up   |
| 6237437 | 7208330 | 1395091 | solute carrier family 7 (cationic amino acid transporter, y+ system), member 11 | Slc7a11 | 310392 | 1,00 | down |
| 6264640 | 7208330 | 1395098 | solute carrier family 7 (cationic amino acid transporter, y+ system), member 11 | Slc7a11 | 310392 | 1,12 | down |
| 6277772 | 7208330 | 1395092 | solute carrier family 7 (cationic amino acid transporter, y+ system), member 11 | Slc7a11 | 310392 | 1,71 | down |
| 6316148 | 7208330 | 1395084 | solute carrier family 7 (cationic amino acid transporter, y+ system), member 11 | Slc7a11 | 310392 | 1,76 | up   |
| 6367515 | 7208330 | 1395086 | solute carrier family 7 (cationic amino acid transporter, y+ system), member 11 | Slc7a11 | 310392 | 1,06 | down |
| 6425724 | 7208330 | 1395087 | solute carrier family 7 (cationic amino acid transporter, y+ system), member 11 | Slc7a11 | 310392 | 1,28 | up   |
| 6440121 | 7208330 | 1395085 | solute carrier family 7 (cationic amino acid transporter, y+ system), member 11 | Slc7a11 | 310392 | 1,39 | up   |
| 6570010 | 7208330 | 1395080 | solute carrier family 7 (cationic amino acid transporter, y+ system), member 11 | Slc7a11 | 310392 | 1,43 | down |
| 6587247 | 7208330 | 1395083 | solute carrier family 7 (cationic amino acid transporter, y+ system), member 11 | Slc7a11 | 310392 | 1,11 | down |
| 5766891 | 7180687 | 1326630 | solute carrier family 7 (cationic amino acid transporter, y+ system), member 6  | Slc7a6  | 307811 | 1,24 | down |
| 5933264 | 7180687 | 1326629 | solute carrier family 7 (cationic amino acid transporter, y+ system), member 6  | Slc7a6  | 307811 | 1,14 | down |
| 5948500 | 7180687 | 1326631 | solute carrier family 7 (cationic amino acid transporter, y+ system), member 6  | Slc7a6  | 307811 | 1,07 | up   |
| 5988609 | 7180687 | 1326630 | solute carrier family 7 (cationic amino acid transporter, y+ system), member 6  | Slc7a6  | 307811 | 1,15 | up   |
| 6081632 | 7180687 | 1326630 | solute carrier family 7 (cationic amino acid transporter, y+ system), member 6  | Slc7a6  | 307811 | 1,06 | down |
| 6246546 | 7180687 | 1326634 | solute carrier family 7 (cationic amino acid transporter, y+ system), member 6  | Slc7a6  | 307811 | 1,23 | up   |
| 6376957 | 7180687 | 1326634 | solute carrier family 7 (cationic amino acid transporter, y+ system), member 6  | Slc7a6  | 307811 | 1,17 | down |
| 6379762 | 7180687 | 1326627 | solute carrier family 7 (cationic amino acid transporter, y+ system), member 6  | Slc7a6  | 307811 | 1,20 | down |
| 6420611 | 7180687 | 1326630 | solute carrier family 7 (cationic amino acid transporter, y+ system), member 6  | Slc7a6  | 307811 | 1,36 | down |
| 6569249 | 7180687 | 1326627 | solute carrier family 7 (cationic amino acid transporter, y+ system), member 6  | Slc7a6  | 307811 | 1,20 | up   |
| 6713236 | 7180687 | 1326627 | solute carrier family 7 (cationic amino acid transporter, y+ system), member 6  | Slc7a6  | 307811 | 1,23 | down |
| 6732697 | 7180687 | 1326633 | solute carrier family 7 (cationic amino acid transporter, y+ system), member 6  | Slc7a6  | 307811 | 1,09 | down |
| 6737289 | 7180687 | 1326632 | solute carrier family 7 (cationic amino acid transporter, y+ system), member 6  | Slc7a6  | 307811 | 1,10 | up   |
| 5642103 | 7302914 | 1629272 | solute carrier family 8 (sodium/calcium exchanger), member 1                    | Slc8a1  | 29715  | 1,06 | down |
| 5804941 | 7302914 | 1629277 | solute carrier family 8 (sodium/calcium exchanger), member 1                    | Slc8a1  | 29715  | 1,07 | up   |
| 5910982 | 7302914 | 1629271 | solute carrier family 8 (sodium/calcium exchanger), member 1                    | Slc8a1  | 29715  | 1,10 | down |
| 6012492 | 7302914 | 1629270 | solute carrier family 8 (sodium/calcium exchanger), member 1                    | Slc8a1  | 29715  | 1,06 | down |
| 6110819 | 7302914 | 1629275 | solute carrier family 8 (sodium/calcium exchanger), member 1                    | Slc8a1  | 29715  | 1,01 | down |
| 6135198 | 7302914 | 1629274 | solute carrier family 8 (sodium/calcium exchanger), member 1                    | Slc8a1  | 29715  | 1,27 | up   |
| 6148342 | 7302914 | 1629273 | solute carrier family 8 (sodium/calcium exchanger), member 1                    | Slc8a1  | 29715  | 1,03 | up   |
| 6287859 | 7302914 | 1629277 | solute carrier family 8 (sodium/calcium exchanger), member 1                    | Slc8a1  | 29715  | 1,16 | up   |
| 6469379 | 7302914 | 1629277 | solute carrier family 8 (sodium/calcium exchanger), member 1                    | Slc8a1  | 29715  | 1,02 | down |
| 6559810 | 7302914 | 1629276 | solute carrier family 8 (sodium/calcium exchanger), member 1                    | Slc8a1  | 29715  | 2,34 | up   |
| 6614174 | 7302914 | 1629270 | solute carrier family 8 (sodium/calcium exchanger), member 1                    | Slc8a1  | 29715  | 1,00 | up   |
| 6709012 | 7302914 | 1629278 | solute carrier family 8 (sodium/calcium exchanger), member 1                    | Slc8a1  | 29715  | 1,87 | up   |
| 5620742 | 7180592 | 1326304 | solute carrier family 9 (sodium/hydrogen exchanger), member 5                   | Slc9a5  | 192215 | 1,15 | down |
| 5641389 | 7180592 | 1326293 | solute carrier family 9 (sodium/hydrogen exchanger), member 5                   | Slc9a5  | 192215 | 1,05 | up   |
| 5790030 | 7180592 | 1326300 | solute carrier family 9 (sodium/hydrogen exchanger), member 5                   | Slc9a5  | 192215 | 1,04 | up   |
| 5803646 | 7180592 | 1326303 | solute carrier family 9 (sodium/hydrogen exchanger), member 5                   | Slc9a5  | 192215 | 1,30 | down |
| 5867079 | 7180592 | 1326305 | solute carrier family 9 (sodium/hydrogen exchanger), member 5                   | Slc9a5  | 192215 | 1,26 | up   |
| 5896085 | 7180592 | 1326295 | solute carrier family 9 (sodium/hydrogen exchanger), member 5                   | Slc9a5  | 192215 | 1,28 | up   |
| 5903747 | 7180592 | 1326297 | solute carrier family 9 (sodium/hydrogen exchanger), member 5                   | Slc9a5  | 192215 | 1,50 | up   |

|         |         |         |                                                               |         |        |      |      |
|---------|---------|---------|---------------------------------------------------------------|---------|--------|------|------|
| 5944507 | 7180592 | 1326307 | solute carrier family 9 (sodium/hydrogen exchanger), member 5 | Slc9a5  | 192215 | 1,17 | down |
| 5949870 | 7180592 | 1326292 | solute carrier family 9 (sodium/hydrogen exchanger), member 5 | Slc9a5  | 192215 | 1,74 | up   |
| 5996380 | 7180592 | 1326291 | solute carrier family 9 (sodium/hydrogen exchanger), member 5 | Slc9a5  | 192215 | 1,05 | up   |
| 6033164 | 7180592 | 1326306 | solute carrier family 9 (sodium/hydrogen exchanger), member 5 | Slc9a5  | 192215 | 2,08 | down |
| 6078255 | 7180592 | 1326306 | solute carrier family 9 (sodium/hydrogen exchanger), member 5 | Slc9a5  | 192215 | 1,09 | up   |
| 6222182 | 7180592 | 1326302 | solute carrier family 9 (sodium/hydrogen exchanger), member 5 | Slc9a5  | 192215 | 1,01 | down |
| 6229741 | 7180592 | 1326299 | solute carrier family 9 (sodium/hydrogen exchanger), member 5 | Slc9a5  | 192215 | 1,01 | down |
| 6301993 | 7180592 | 1326296 | solute carrier family 9 (sodium/hydrogen exchanger), member 5 | Slc9a5  | 192215 | 1,11 | down |
| 6343125 | 7180592 | 1326294 | solute carrier family 9 (sodium/hydrogen exchanger), member 5 | Slc9a5  | 192215 | 1,21 | up   |
| 6402960 | 7180592 | 1326298 | solute carrier family 9 (sodium/hydrogen exchanger), member 5 | Slc9a5  | 192215 | 1,04 | down |
| 6409457 | 7180592 | 1326305 | solute carrier family 9 (sodium/hydrogen exchanger), member 5 | Slc9a5  | 192215 | 1,04 | up   |
| 6462059 | 7180592 | 1326301 | solute carrier family 9 (sodium/hydrogen exchanger), member 5 | Slc9a5  | 192215 | 1,26 | down |
| 6548867 | 7180592 | 1326291 | solute carrier family 9 (sodium/hydrogen exchanger), member 5 | Slc9a5  | 192215 | 1,48 | down |
| 5675788 | 7235521 | 1462156 | solute carrier family 9 (sodium/hydrogen exchanger), member 8 | Slc9a8  | 311651 | 1,03 | down |
| 5704127 | 7235521 | 1462163 | solute carrier family 9 (sodium/hydrogen exchanger), member 8 | Slc9a8  | 311651 | 1,63 | down |
| 5765292 | 7235521 | 1462163 | solute carrier family 9 (sodium/hydrogen exchanger), member 8 | Slc9a8  | 311651 | 1,45 | down |
| 5882984 | 7235521 | 1462145 | solute carrier family 9 (sodium/hydrogen exchanger), member 8 | Slc9a8  | 311651 | 1,34 | down |
| 5896809 | 7235521 | 1462161 | solute carrier family 9 (sodium/hydrogen exchanger), member 8 | Slc9a8  | 311651 | 1,15 | down |
| 5905614 | 7235521 | 1462155 | solute carrier family 9 (sodium/hydrogen exchanger), member 8 | Slc9a8  | 311651 | 1,44 | up   |
| 6012768 | 7235521 | 1462150 | solute carrier family 9 (sodium/hydrogen exchanger), member 8 | Slc9a8  | 311651 | 1,09 | up   |
| 6027699 | 7235521 | 1462163 | solute carrier family 9 (sodium/hydrogen exchanger), member 8 | Slc9a8  | 311651 | 1,09 | up   |
| 6051711 | 7235521 | 1462153 | solute carrier family 9 (sodium/hydrogen exchanger), member 8 | Slc9a8  | 311651 | 1,00 | up   |
| 6138212 | 7235521 | 1462141 | solute carrier family 9 (sodium/hydrogen exchanger), member 8 | Slc9a8  | 311651 | 1,19 | up   |
| 6155028 | 7235521 | 1462160 | solute carrier family 9 (sodium/hydrogen exchanger), member 8 | Slc9a8  | 311651 | 1,02 | up   |
| 6158277 | 7235521 | 1462155 | solute carrier family 9 (sodium/hydrogen exchanger), member 8 | Slc9a8  | 311651 | 1,20 | down |
| 6222518 | 7235521 | 1462162 | solute carrier family 9 (sodium/hydrogen exchanger), member 8 | Slc9a8  | 311651 | 1,19 | down |
| 6236514 | 7235521 | 1462148 | solute carrier family 9 (sodium/hydrogen exchanger), member 8 | Slc9a8  | 311651 | 1,04 | up   |
| 6325896 | 7235521 | 1462157 | solute carrier family 9 (sodium/hydrogen exchanger), member 8 | Slc9a8  | 311651 | 1,04 | down |
| 6326572 | 7235521 | 1462159 | solute carrier family 9 (sodium/hydrogen exchanger), member 8 | Slc9a8  | 311651 | 1,19 | down |
| 6374383 | 7235521 | 1462147 | solute carrier family 9 (sodium/hydrogen exchanger), member 8 | Slc9a8  | 311651 | 1,17 | up   |
| 6569614 | 7235521 | 1462146 | solute carrier family 9 (sodium/hydrogen exchanger), member 8 | Slc9a8  | 311651 | 1,17 | down |
| 5662534 | 7270891 | 1549443 | solute carrier organic anion transporter family, member 1a1   | Slco1a1 | 50572  | 1,01 | down |
| 5742777 | 7270891 | 1549437 | solute carrier organic anion transporter family, member 1a1   | Slco1a1 | 50572  | 1,02 | up   |
| 6115572 | 7270891 | 1549440 | solute carrier organic anion transporter family, member 1a1   | Slco1a1 | 50572  | 1,02 | up   |
| 6348082 | 7270891 | 1549444 | solute carrier organic anion transporter family, member 1a1   | Slco1a1 | 50572  | 1,05 | up   |
| 6370194 | 7270891 | 1549444 | solute carrier organic anion transporter family, member 1a1   | Slco1a1 | 50572  | 1,03 | down |
| 6443618 | 7270891 | 1549441 | solute carrier organic anion transporter family, member 1a1   | Slco1a1 | 50572  | 1,59 | down |
| 6451008 | 7270891 | 1549438 | solute carrier organic anion transporter family, member 1a1   | Slco1a1 | 50572  | 1,01 | down |
| 6650644 | 7270891 | 1549436 | solute carrier organic anion transporter family, member 1a1   | Slco1a1 | 50572  | 1,02 | down |
| 6660493 | 7270891 | 1549442 | solute carrier organic anion transporter family, member 1a1   | Slco1a1 | 50572  | 1,28 | up   |
| 6673623 | 7270891 | 1549439 | solute carrier organic anion transporter family, member 1a1   | Slco1a1 | 50572  | 1,76 | down |
| 5632159 | 7270891 | 1549458 | solute carrier organic anion transporter family, member 1a5   | Slco1a5 | 80900  | 1,05 | up   |
| 5641361 | 7270891 | 1549452 | solute carrier organic anion transporter family, member 1a5   | Slco1a5 | 80900  | 1,02 | up   |
| 5873290 | 7270891 | 1549445 | solute carrier organic anion transporter family, member 1a5   | Slco1a5 | 80900  | 1,09 | down |
| 5927451 | 7270891 | 1549453 | solute carrier organic anion transporter family, member 1a5   | Slco1a5 | 80900  | 1,20 | up   |
| 5943130 | 7270891 | 1549447 | solute carrier organic anion transporter family, member 1a5   | Slco1a5 | 80900  | 1,70 | up   |
| 6010555 | 7270891 | 1549457 | solute carrier organic anion transporter family, member 1a5   | Slco1a5 | 80900  | 1,04 | up   |
| 6012194 | 7270891 | 1549445 | solute carrier organic anion transporter family, member 1a5   | Slco1a5 | 80900  | 1,04 | down |
| 6024980 | 7270891 | 1549458 | solute carrier organic anion transporter family, member 1a5   | Slco1a5 | 80900  | 1,05 | down |
| 6078068 | 7270891 | 1549454 | solute carrier organic anion transporter family, member 1a5   | Slco1a5 | 80900  | 1,30 | up   |
| 6096451 | 7270891 | 1549459 | solute carrier organic anion transporter family, member 1a5   | Slco1a5 | 80900  | 1,31 | up   |
| 6130409 | 7270891 | 1549459 | solute carrier organic anion transporter family, member 1a5   | Slco1a5 | 80900  | 1,13 | down |
| 6174606 | 7270891 | 1549446 | solute carrier organic anion transporter family, member 1a5   | Slco1a5 | 80900  | 1,33 | up   |
| 6340572 | 7270891 | 1549448 | solute carrier organic anion transporter family, member 1a5   | Slco1a5 | 80900  | 1,11 | up   |
| 6408678 | 7270891 | 1549449 | solute carrier organic anion transporter family, member 1a5   | Slco1a5 | 80900  | 1,31 | up   |
| 6413408 | 7270891 | 1549456 | solute carrier organic anion transporter family, member 1a5   | Slco1a5 | 80900  | 2,04 | up   |

|         |         |         |                                                                                      |                     |                 |      |      |
|---------|---------|---------|--------------------------------------------------------------------------------------|---------------------|-----------------|------|------|
| 6479781 | 7270891 | 1549446 | solute carrier organic anion transporter family, member 1a5                          | Slco1a5             | 80900           | 1,01 | down |
| 6562829 | 7270891 | 1549450 | solute carrier organic anion transporter family, member 1a5                          | Slco1a5             | 80900           | 1,87 | up   |
| 6576079 | 7270891 | 1549445 | solute carrier organic anion transporter family, member 1a5                          | Slco1a5             | 80900           | 1,54 | up   |
| 6648649 | 7270891 | 1549451 | solute carrier organic anion transporter family, member 1a5                          | Slco1a5             | 80900           | 1,00 | down |
| 6699871 | 7270891 | 1549445 | solute carrier organic anion transporter family, member 1a5                          | Slco1a5             | 80900           | 1,01 | up   |
| 6027512 | 7270891 | 1549455 | solute carrier organic anion transporter family, member 1a5 /// solute carrier organ | Slco1a5 /// Slco1a1 | 80900 /// 50572 | 1,20 | up   |
| 5655807 | 7339851 | 1719637 | solute carrier organic anion transporter family, member 2a1                          | Slco2a1             | 24546           | 1,06 | down |
| 5697782 | 7339851 | 1719646 | solute carrier organic anion transporter family, member 2a1                          | Slco2a1             | 24546           | 1,20 | down |
| 5714559 | 7339851 | 1719639 | solute carrier organic anion transporter family, member 2a1                          | Slco2a1             | 24546           | 1,16 | down |
| 5771343 | 7339851 | 1719646 | solute carrier organic anion transporter family, member 2a1                          | Slco2a1             | 24546           | 1,18 | up   |
| 5789774 | 7339851 | 1719649 | solute carrier organic anion transporter family, member 2a1                          | Slco2a1             | 24546           | 1,01 | up   |
| 5818034 | 7339851 | 1719645 | solute carrier organic anion transporter family, member 2a1                          | Slco2a1             | 24546           | 1,09 | down |
| 5822584 | 7339851 | 1719642 | solute carrier organic anion transporter family, member 2a1                          | Slco2a1             | 24546           | 1,22 | up   |
| 5841445 | 7339851 | 1719638 | solute carrier organic anion transporter family, member 2a1                          | Slco2a1             | 24546           | 1,31 | down |
| 5856676 | 7339851 | 1719646 | solute carrier organic anion transporter family, member 2a1                          | Slco2a1             | 24546           | 1,33 | up   |
| 5952681 | 7339851 | 1719638 | solute carrier organic anion transporter family, member 2a1                          | Slco2a1             | 24546           | 1,13 | down |
| 5971213 | 7339851 | 1719647 | solute carrier organic anion transporter family, member 2a1                          | Slco2a1             | 24546           | 1,42 | down |
| 6074766 | 7339851 | 1719641 | solute carrier organic anion transporter family, member 2a1                          | Slco2a1             | 24546           | 1,19 | up   |
| 6114685 | 7339851 | 1719639 | solute carrier organic anion transporter family, member 2a1                          | Slco2a1             | 24546           | 2,33 | up   |
| 6138443 | 7339851 | 1719644 | solute carrier organic anion transporter family, member 2a1                          | Slco2a1             | 24546           | 2,84 | down |
| 6210472 | 7339851 | 1719637 | solute carrier organic anion transporter family, member 2a1                          | Slco2a1             | 24546           | 1,25 | down |
| 6338794 | 7339851 | 1719640 | solute carrier organic anion transporter family, member 2a1                          | Slco2a1             | 24546           | 1,04 | down |
| 6370338 | 7339851 | 1719639 | solute carrier organic anion transporter family, member 2a1                          | Slco2a1             | 24546           | 1,15 | down |
| 6385207 | 7339851 | 1719648 | solute carrier organic anion transporter family, member 2a1                          | Slco2a1             | 24546           | 1,30 | up   |
| 6478153 | 7339851 | 1719645 | solute carrier organic anion transporter family, member 2a1                          | Slco2a1             | 24546           | 2,11 | up   |
| 6521957 | 7339851 | 1719643 | solute carrier organic anion transporter family, member 2a1                          | Slco2a1             | 24546           | 1,15 | down |
| 5687512 | 7073458 | 1064466 | somatostatin receptor 2                                                              | Sstr2               | 54305           | 1,18 | up   |
| 5970158 | 7073458 | 1064467 | somatostatin receptor 2                                                              | Sstr2               | 54305           | 1,55 | down |
| 6009049 | 7073458 | 1064466 | somatostatin receptor 2                                                              | Sstr2               | 54305           | 1,42 | down |
| 6381683 | 7073458 | 1064467 | somatostatin receptor 2                                                              | Sstr2               | 54305           | 1,06 | down |
| 6394315 | 7073458 | 1064467 | somatostatin receptor 2                                                              | Sstr2               | 54305           | 1,75 | up   |
| 6624644 | 7073458 | 1064465 | somatostatin receptor 2                                                              | Sstr2               | 54305           | 1,64 | up   |
| 6631211 | 7073458 | 1064466 | somatostatin receptor 2                                                              | Sstr2               | 54305           | 2,45 | up   |
| 5629803 | 7062436 | 1037700 | sorbin and SH3 domain containing 1                                                   | Sorbs1              | 686098          | 1,28 | down |
| 5634952 | 7062436 | 1037686 | sorbin and SH3 domain containing 1                                                   | Sorbs1              | 686098          | 1,10 | down |
| 5661366 | 7062436 | 1037690 | sorbin and SH3 domain containing 1                                                   | Sorbs1              | 686098          | 1,05 | up   |
| 5686573 | 7062436 | 1037704 | sorbin and SH3 domain containing 1                                                   | Sorbs1              | 686098          | 1,92 | down |
| 5697263 | 7062436 | 1037649 | sorbin and SH3 domain containing 1                                                   | Sorbs1              | 686098          | 1,23 | up   |
| 5768901 | 7062436 | 1037693 | sorbin and SH3 domain containing 1                                                   | Sorbs1              | 686098          | 1,33 | down |
| 5775668 | 7062436 | 1037657 | sorbin and SH3 domain containing 1                                                   | Sorbs1              | 686098          | 1,07 | up   |
| 5812012 | 7062436 | 1037677 | sorbin and SH3 domain containing 1                                                   | Sorbs1              | 686098          | 1,86 | down |
| 5848668 | 7062436 | 1037679 | sorbin and SH3 domain containing 1                                                   | Sorbs1              | 686098          | 1,21 | up   |
| 5911026 | 7062436 | 1037685 | sorbin and SH3 domain containing 1                                                   | Sorbs1              | 686098          | 1,09 | up   |
| 5914411 | 7062436 | 1037652 | sorbin and SH3 domain containing 1                                                   | Sorbs1              | 686098          | 1,00 | up   |
| 5927228 | 7062436 | 1037657 | sorbin and SH3 domain containing 1                                                   | Sorbs1              | 686098          | 1,36 | down |
| 5930608 | 7062436 | 1037657 | sorbin and SH3 domain containing 1                                                   | Sorbs1              | 686098          | 1,13 | up   |
| 5934751 | 7062436 | 1037681 | sorbin and SH3 domain containing 1                                                   | Sorbs1              | 686098          | 1,62 | up   |
| 5965376 | 7062436 | 1037676 | sorbin and SH3 domain containing 1                                                   | Sorbs1              | 686098          | 1,76 | down |
| 5976361 | 7062436 | 1037672 | sorbin and SH3 domain containing 1                                                   | Sorbs1              | 686098          | 1,08 | down |
| 5996367 | 7062436 | 1037667 | sorbin and SH3 domain containing 1                                                   | Sorbs1              | 686098          | 1,41 | up   |
| 5998173 | 7062436 | 1037687 | sorbin and SH3 domain containing 1                                                   | Sorbs1              | 686098          | 1,53 | down |
| 6057852 | 7062436 | 1037659 | sorbin and SH3 domain containing 1                                                   | Sorbs1              | 686098          | 1,12 | up   |
| 6091761 | 7062436 | 1037663 | sorbin and SH3 domain containing 1                                                   | Sorbs1              | 686098          | 1,09 | up   |
| 6110924 | 7062436 | 1037661 | sorbin and SH3 domain containing 1                                                   | Sorbs1              | 686098          | 1,72 | down |
| 6119615 | 7062436 | 1037693 | sorbin and SH3 domain containing 1                                                   | Sorbs1              | 686098          | 1,83 | down |
| 6157770 | 7062436 | 1037660 | sorbin and SH3 domain containing 1                                                   | Sorbs1              | 686098          | 1,48 | up   |

|         |         |         |                                    |        |        |      |      |
|---------|---------|---------|------------------------------------|--------|--------|------|------|
| 6272391 | 7062436 | 1037661 | sorbin and SH3 domain containing 1 | Sorbs1 | 686098 | 2,27 | down |
| 6279791 | 7062436 | 1037680 | sorbin and SH3 domain containing 1 | Sorbs1 | 686098 | 1,37 | up   |
| 6410493 | 7062436 | 1037692 | sorbin and SH3 domain containing 1 | Sorbs1 | 686098 | 2,26 | up   |
| 6416695 | 7062436 | 1037675 | sorbin and SH3 domain containing 1 | Sorbs1 | 686098 | 1,07 | up   |
| 6452579 | 7062436 | 1037687 | sorbin and SH3 domain containing 1 | Sorbs1 | 686098 | 1,32 | up   |
| 6489872 | 7062436 | 1037701 | sorbin and SH3 domain containing 1 | Sorbs1 | 686098 | 1,49 | down |
| 6501144 | 7062436 | 1037662 | sorbin and SH3 domain containing 1 | Sorbs1 | 686098 | 1,02 | down |
| 6600288 | 7062436 | 1037665 | sorbin and SH3 domain containing 1 | Sorbs1 | 686098 | 2,40 | up   |
| 6626290 | 7062436 | 1037660 | sorbin and SH3 domain containing 1 | Sorbs1 | 686098 | 1,37 | down |
| 6638621 | 7062436 | 1037702 | sorbin and SH3 domain containing 1 | Sorbs1 | 686098 | 1,37 | up   |
| 6655638 | 7062436 | 1037680 | sorbin and SH3 domain containing 1 | Sorbs1 | 686098 | 1,44 | down |
| 6684644 | 7062436 | 1037684 | sorbin and SH3 domain containing 1 | Sorbs1 | 686098 | 1,06 | down |
| 6686505 | 7062436 | 1037649 | sorbin and SH3 domain containing 1 | Sorbs1 | 686098 | 1,32 | up   |
| 6739220 | 7062436 | 1037650 | sorbin and SH3 domain containing 1 | Sorbs1 | 686098 | 1,89 | up   |
| 5631580 | 7139731 | 1225110 | sorbin and SH3 domain containing 3 | Sorbs3 | 282843 | 1,13 | up   |
| 5655931 | 7139731 | 1225122 | sorbin and SH3 domain containing 3 | Sorbs3 | 282843 | 1,17 | up   |
| 5715098 | 7139731 | 1225111 | sorbin and SH3 domain containing 3 | Sorbs3 | 282843 | 2,00 | down |
| 5730458 | 7139731 | 1225128 | sorbin and SH3 domain containing 3 | Sorbs3 | 282843 | 1,32 | down |
| 5807249 | 7139731 | 1225125 | sorbin and SH3 domain containing 3 | Sorbs3 | 282843 | 1,04 | down |
| 5833743 | 7139731 | 1225119 | sorbin and SH3 domain containing 3 | Sorbs3 | 282843 | 1,19 | up   |
| 5835324 | 7139731 | 1225112 | sorbin and SH3 domain containing 3 | Sorbs3 | 282843 | 1,38 | up   |
| 5862068 | 7139731 | 1225127 | sorbin and SH3 domain containing 3 | Sorbs3 | 282843 | 1,41 | up   |
| 5901764 | 7139731 | 1225126 | sorbin and SH3 domain containing 3 | Sorbs3 | 282843 | 1,33 | down |
| 5963965 | 7139731 | 1225121 | sorbin and SH3 domain containing 3 | Sorbs3 | 282843 | 1,05 | up   |
| 6034556 | 7139731 | 1225127 | sorbin and SH3 domain containing 3 | Sorbs3 | 282843 | 1,08 | down |
| 6035039 | 7139731 | 1225129 | sorbin and SH3 domain containing 3 | Sorbs3 | 282843 | 1,10 | down |
| 6041706 | 7139731 | 1225124 | sorbin and SH3 domain containing 3 | Sorbs3 | 282843 | 1,28 | down |
| 6117770 | 7139731 | 1225109 | sorbin and SH3 domain containing 3 | Sorbs3 | 282843 | 1,23 | down |
| 6157263 | 7139731 | 1225115 | sorbin and SH3 domain containing 3 | Sorbs3 | 282843 | 1,59 | up   |
| 6206206 | 7139731 | 1225123 | sorbin and SH3 domain containing 3 | Sorbs3 | 282843 | 1,19 | up   |
| 6224472 | 7139731 | 1225113 | sorbin and SH3 domain containing 3 | Sorbs3 | 282843 | 1,84 | up   |
| 6273202 | 7139731 | 1225112 | sorbin and SH3 domain containing 3 | Sorbs3 | 282843 | 1,05 | down |
| 6317811 | 7139731 | 1225116 | sorbin and SH3 domain containing 3 | Sorbs3 | 282843 | 1,59 | up   |
| 6335434 | 7139731 | 1225120 | sorbin and SH3 domain containing 3 | Sorbs3 | 282843 | 1,09 | up   |
| 6362703 | 7139731 | 1225117 | sorbin and SH3 domain containing 3 | Sorbs3 | 282843 | 2,15 | down |
| 6407843 | 7139731 | 1225118 | sorbin and SH3 domain containing 3 | Sorbs3 | 282843 | 1,30 | down |
| 6508188 | 7139731 | 1225129 | sorbin and SH3 domain containing 3 | Sorbs3 | 282843 | 1,14 | down |
| 6536193 | 7139731 | 1225123 | sorbin and SH3 domain containing 3 | Sorbs3 | 282843 | 1,04 | up   |
| 6536474 | 7139731 | 1225112 | sorbin and SH3 domain containing 3 | Sorbs3 | 282843 | 1,01 | down |
| 6693929 | 7139731 | 1225114 | sorbin and SH3 domain containing 3 | Sorbs3 | 282843 | 1,13 | up   |
| 5663521 | 7198002 | 1370434 | sortilin 1                         | Sort1  | 83576  | 1,18 | down |
| 5676744 | 7198002 | 1370445 | sortilin 1                         | Sort1  | 83576  | 1,34 | down |
| 5690288 | 7198002 | 1370414 | sortilin 1                         | Sort1  | 83576  | 1,97 | up   |
| 5843373 | 7198002 | 1370443 | sortilin 1                         | Sort1  | 83576  | 1,65 | up   |
| 5927195 | 7198002 | 1370427 | sortilin 1                         | Sort1  | 83576  | 1,18 | down |
| 5940265 | 7198002 | 1370431 | sortilin 1                         | Sort1  | 83576  | 1,81 | up   |
| 5992838 | 7198002 | 1370429 | sortilin 1                         | Sort1  | 83576  | 1,14 | down |
| 6050720 | 7198002 | 1370415 | sortilin 1                         | Sort1  | 83576  | 1,77 | up   |
| 6082579 | 7198002 | 1370440 | sortilin 1                         | Sort1  | 83576  | 1,33 | down |
| 6111959 | 7198002 | 1370413 | sortilin 1                         | Sort1  | 83576  | 1,67 | up   |
| 6132475 | 7198002 | 1370426 | sortilin 1                         | Sort1  | 83576  | 1,23 | down |
| 6152909 | 7198002 | 1370431 | sortilin 1                         | Sort1  | 83576  | 1,16 | up   |
| 6211586 | 7198002 | 1370432 | sortilin 1                         | Sort1  | 83576  | 1,16 | down |
| 6229853 | 7198002 | 1370442 | sortilin 1                         | Sort1  | 83576  | 1,24 | up   |
| 6232530 | 7198002 | 1370433 | sortilin 1                         | Sort1  | 83576  | 1,65 | down |
| 6386073 | 7198002 | 1370439 | sortilin 1                         | Sort1  | 83576  | 1,40 | down |



|         |         |         |                                                            |        |        |      |      |
|---------|---------|---------|------------------------------------------------------------|--------|--------|------|------|
| 6473551 | 7198002 | 1370437 | sortilin 1                                                 | Sort1  | 83576  | 1,15 | down |
| 6529350 | 7198002 | 1370430 | sortilin 1                                                 | Sort1  | 83576  | 1,05 | down |
| 6529738 | 7198002 | 1370445 | sortilin 1                                                 | Sort1  | 83576  | 1,08 | down |
| 6553230 | 7198002 | 1370428 | sortilin 1                                                 | Sort1  | 83576  | 1,04 | down |
| 6602529 | 7198002 | 1370425 | sortilin 1                                                 | Sort1  | 83576  | 1,18 | down |
| 6614776 | 7198002 | 1370438 | sortilin 1                                                 | Sort1  | 83576  | 1,43 | down |
| 6669894 | 7198002 | 1370423 | sortilin 1                                                 | Sort1  | 83576  | 1,07 | up   |
| 6733557 | 7198002 | 1370436 | sortilin 1                                                 | Sort1  | 83576  | 1,24 | down |
| 5650758 | 7344530 | 1731556 | sortilin-related receptor, LDLR class A repeats-containing | Sor1l  | 300652 | 1,05 | up   |
| 5967472 | 7344530 | 1731557 | sortilin-related receptor, LDLR class A repeats-containing | Sor1l  | 300652 | 1,00 | down |
| 6007793 | 7344530 | 1731556 | sortilin-related receptor, LDLR class A repeats-containing | Sor1l  | 300652 | 1,17 | down |
| 6696153 | 7344530 | 1731556 | sortilin-related receptor, LDLR class A repeats-containing | Sor1l  | 300652 | 1,17 | down |
| 5620409 | 7120039 | 1177515 | sortilin-related VPS10 domain containing receptor 2        | Sorcs2 | 305438 | 1,30 | up   |
| 5636711 | 7120039 | 1177534 | sortilin-related VPS10 domain containing receptor 2        | Sorcs2 | 305438 | 1,10 | up   |
| 5689736 | 7120039 | 1177542 | sortilin-related VPS10 domain containing receptor 2        | Sorcs2 | 305438 | 1,05 | up   |
| 5754536 | 7120039 | 1177543 | sortilin-related VPS10 domain containing receptor 2        | Sorcs2 | 305438 | 1,41 | up   |
| 5800001 | 7120039 | 1177531 | sortilin-related VPS10 domain containing receptor 2        | Sorcs2 | 305438 | 1,70 | down |
| 5808908 | 7120039 | 1177533 | sortilin-related VPS10 domain containing receptor 2        | Sorcs2 | 305438 | 1,11 | up   |
| 5894720 | 7120039 | 1177541 | sortilin-related VPS10 domain containing receptor 2        | Sorcs2 | 305438 | 1,13 | down |
| 5963808 | 7120039 | 1177543 | sortilin-related VPS10 domain containing receptor 2        | Sorcs2 | 305438 | 1,69 | down |
| 5965226 | 7120039 | 1177538 | sortilin-related VPS10 domain containing receptor 2        | Sorcs2 | 305438 | 1,12 | up   |
| 5971354 | 7120039 | 1177519 | sortilin-related VPS10 domain containing receptor 2        | Sorcs2 | 305438 | 1,43 | up   |
| 5979590 | 7120039 | 1177552 | sortilin-related VPS10 domain containing receptor 2        | Sorcs2 | 305438 | 1,32 | up   |
| 5984600 | 7120039 | 1177522 | sortilin-related VPS10 domain containing receptor 2        | Sorcs2 | 305438 | 3,01 | down |
| 6010556 | 7120039 | 1177551 | sortilin-related VPS10 domain containing receptor 2        | Sorcs2 | 305438 | 1,35 | up   |
| 6022402 | 7120039 | 1177453 | sortilin-related VPS10 domain containing receptor 2        | Sorcs2 | 305438 | 1,04 | up   |
| 6065241 | 7120039 | 1177453 | sortilin-related VPS10 domain containing receptor 2        | Sorcs2 | 305438 | 1,16 | up   |
| 6074864 | 7120039 | 1177528 | sortilin-related VPS10 domain containing receptor 2        | Sorcs2 | 305438 | 1,71 | down |
| 6196867 | 7120039 | 1177540 | sortilin-related VPS10 domain containing receptor 2        | Sorcs2 | 305438 | 1,07 | down |
| 6208600 | 7120039 | 1177552 | sortilin-related VPS10 domain containing receptor 2        | Sorcs2 | 305438 | 1,35 | down |
| 6403228 | 7120039 | 1177524 | sortilin-related VPS10 domain containing receptor 2        | Sorcs2 | 305438 | 1,43 | down |
| 6433128 | 7120039 | 1177521 | sortilin-related VPS10 domain containing receptor 2        | Sorcs2 | 305438 | 1,27 | down |
| 6449396 | 7120039 | 1177544 | sortilin-related VPS10 domain containing receptor 2        | Sorcs2 | 305438 | 1,00 | up   |
| 6526410 | 7120039 | 1177488 | sortilin-related VPS10 domain containing receptor 2        | Sorcs2 | 305438 | 1,28 | down |
| 6575910 | 7120039 | 1177527 | sortilin-related VPS10 domain containing receptor 2        | Sorcs2 | 305438 | 1,01 | up   |
| 6594562 | 7120039 | 1177530 | sortilin-related VPS10 domain containing receptor 2        | Sorcs2 | 305438 | 1,21 | down |
| 6649447 | 7120039 | 1177529 | sortilin-related VPS10 domain containing receptor 2        | Sorcs2 | 305438 | 2,98 | down |
| 6651912 | 7120039 | 1177547 | sortilin-related VPS10 domain containing receptor 2        | Sorcs2 | 305438 | 1,19 | down |
| 6664977 | 7120039 | 1177545 | sortilin-related VPS10 domain containing receptor 2        | Sorcs2 | 305438 | 1,12 | down |
| 6668685 | 7120039 | 1177469 | sortilin-related VPS10 domain containing receptor 2        | Sorcs2 | 305438 | 1,12 | up   |
| 6715499 | 7120039 | 1177520 | sortilin-related VPS10 domain containing receptor 2        | Sorcs2 | 305438 | 1,50 | up   |
| 6721801 | 7120039 | 1177549 | sortilin-related VPS10 domain containing receptor 2        | Sorcs2 | 305438 | 1,37 | down |
| 6744369 | 7120039 | 1177535 | sortilin-related VPS10 domain containing receptor 2        | Sorcs2 | 305438 | 1,06 | up   |
| 5655765 | 7253707 | 1506795 | sorting nexin 10                                           | Snx10  | 297096 | 1,50 | down |
| 5802907 | 7253707 | 1506798 | sorting nexin 10                                           | Snx10  | 297096 | 1,10 | up   |
| 5818024 | 7253707 | 1506794 | sorting nexin 10                                           | Snx10  | 297096 | 1,26 | down |
| 5926109 | 7253707 | 1506796 | sorting nexin 10                                           | Snx10  | 297096 | 1,75 | up   |
| 6017508 | 7253707 | 1506795 | sorting nexin 10                                           | Snx10  | 297096 | 1,35 | down |
| 6058334 | 7253707 | 1506797 | sorting nexin 10                                           | Snx10  | 297096 | 1,22 | down |
| 6322435 | 7253707 | 1506799 | sorting nexin 10                                           | Snx10  | 297096 | 1,54 | up   |
| 6682983 | 7253707 | 1506799 | sorting nexin 10                                           | Snx10  | 297096 | 2,01 | up   |
| 5621039 | 7049689 | 1008894 | sorting nexin 26                                           | Snx26  | 361540 | 1,40 | down |
| 5639611 | 7049689 | 1008876 | sorting nexin 26                                           | Snx26  | 361540 | 1,04 | down |
| 5688616 | 7049689 | 1008878 | sorting nexin 26                                           | Snx26  | 361540 | 1,52 | up   |
| 5736976 | 7049689 | 1008887 | sorting nexin 26                                           | Snx26  | 361540 | 1,16 | down |
| 5738768 | 7049689 | 1008891 | sorting nexin 26                                           | Snx26  | 361540 | 1,22 | down |

|         |         |         |                       |       |        |      |      |
|---------|---------|---------|-----------------------|-------|--------|------|------|
| 5743637 | 7049689 | 1008895 | sorting nexin 26      | Snx26 | 361540 | 1,85 | up   |
| 5756076 | 7049689 | 1008876 | sorting nexin 26      | Snx26 | 361540 | 2,00 | down |
| 5773751 | 7049689 | 1008896 | sorting nexin 26      | Snx26 | 361540 | 1,19 | up   |
| 5779168 | 7049689 | 1008876 | sorting nexin 26      | Snx26 | 361540 | 2,11 | up   |
| 5883829 | 7049689 | 1008875 | sorting nexin 26      | Snx26 | 361540 | 1,42 | up   |
| 5909641 | 7049689 | 1008873 | sorting nexin 26      | Snx26 | 361540 | 1,26 | up   |
| 6016019 | 7049689 | 1008876 | sorting nexin 26      | Snx26 | 361540 | 1,15 | down |
| 6079561 | 7049689 | 1008882 | sorting nexin 26      | Snx26 | 361540 | 1,06 | down |
| 6082024 | 7049689 | 1008876 | sorting nexin 26      | Snx26 | 361540 | 1,09 | down |
| 6179637 | 7049689 | 1008886 | sorting nexin 26      | Snx26 | 361540 | 1,68 | down |
| 6207341 | 7049689 | 1008885 | sorting nexin 26      | Snx26 | 361540 | 1,54 | down |
| 6293092 | 7049689 | 1008873 | sorting nexin 26      | Snx26 | 361540 | 1,17 | up   |
| 6337423 | 7049689 | 1008875 | sorting nexin 26      | Snx26 | 361540 | 1,09 | up   |
| 6442617 | 7049689 | 1008889 | sorting nexin 26      | Snx26 | 361540 | 1,04 | down |
| 6453396 | 7049689 | 1008893 | sorting nexin 26      | Snx26 | 361540 | 1,49 | down |
| 6481571 | 7049689 | 1008890 | sorting nexin 26      | Snx26 | 361540 | 1,00 | down |
| 6496690 | 7049689 | 1008877 | sorting nexin 26      | Snx26 | 361540 | 1,42 | down |
| 6497160 | 7049689 | 1008888 | sorting nexin 26      | Snx26 | 361540 | 1,52 | up   |
| 6541968 | 7049689 | 1008879 | sorting nexin 26      | Snx26 | 361540 | 1,25 | down |
| 6652917 | 7049689 | 1008884 | sorting nexin 26      | Snx26 | 361540 | 1,61 | up   |
| 6717805 | 7049689 | 1008897 | sorting nexin 26      | Snx26 | 361540 | 3,12 | up   |
| 5679401 | 7213341 | 1406260 | sorting nexin 7       | Snx7  | 310815 | 1,15 | up   |
| 5743681 | 7213341 | 1406261 | sorting nexin 7       | Snx7  | 310815 | 1,04 | up   |
| 5926111 | 7213341 | 1406263 | sorting nexin 7       | Snx7  | 310815 | 1,15 | up   |
| 6006907 | 7213341 | 1406262 | sorting nexin 7       | Snx7  | 310815 | 1,07 | down |
| 6062272 | 7213341 | 1406258 | sorting nexin 7       | Snx7  | 310815 | 1,17 | down |
| 6306475 | 7213341 | 1406257 | sorting nexin 7       | Snx7  | 310815 | 1,40 | down |
| 6535998 | 7213341 | 1406259 | sorting nexin 7       | Snx7  | 310815 | 2,36 | up   |
| 6602986 | 7213341 | 1406265 | sorting nexin 7       | Snx7  | 310815 | 2,46 | down |
| 6636024 | 7213341 | 1406264 | sorting nexin 7       | Snx7  | 310815 | 1,23 | up   |
| 6732551 | 7213341 | 1406256 | sorting nexin 7       | Snx7  | 310815 | 1,28 | down |
| 5629642 | 7096873 | 1119377 | sorting nexin 8       | Snx8  | 288504 | 1,50 | down |
| 5637422 | 7096873 | 1119369 | sorting nexin 8       | Snx8  | 288504 | 1,13 | up   |
| 5670593 | 7096873 | 1119377 | sorting nexin 8       | Snx8  | 288504 | 1,09 | down |
| 5738120 | 7096873 | 1119383 | sorting nexin 8       | Snx8  | 288504 | 1,08 | up   |
| 5772561 | 7096873 | 1119381 | sorting nexin 8       | Snx8  | 288504 | 1,53 | up   |
| 5798847 | 7096873 | 1119386 | sorting nexin 8       | Snx8  | 288504 | 2,41 | down |
| 5965076 | 7096873 | 1119386 | sorting nexin 8       | Snx8  | 288504 | 1,14 | up   |
| 6253315 | 7096873 | 1119369 | sorting nexin 8       | Snx8  | 288504 | 1,46 | down |
| 6339267 | 7096873 | 1119375 | sorting nexin 8       | Snx8  | 288504 | 1,54 | up   |
| 6366781 | 7096873 | 1119372 | sorting nexin 8       | Snx8  | 288504 | 1,01 | down |
| 6383650 | 7096873 | 1119374 | sorting nexin 8       | Snx8  | 288504 | 1,03 | up   |
| 6400094 | 7096873 | 1119376 | sorting nexin 8       | Snx8  | 288504 | 1,89 | up   |
| 6419652 | 7096873 | 1119386 | sorting nexin 8       | Snx8  | 288504 | 1,07 | up   |
| 6423461 | 7096873 | 1119386 | sorting nexin 8       | Snx8  | 288504 | 1,13 | up   |
| 6448689 | 7096873 | 1119385 | sorting nexin 8       | Snx8  | 288504 | 1,07 | down |
| 6477407 | 7096873 | 1119373 | sorting nexin 8       | Snx8  | 288504 | 2,17 | up   |
| 5696104 | 7356958 | 1762104 | SP100 nuclear antigen | Sp100 | 363269 | 1,56 | up   |
| 5828363 | 7356958 | 1762105 | SP100 nuclear antigen | Sp100 | 363269 | 1,29 | down |
| 6043325 | 7356958 | 1762109 | SP100 nuclear antigen | Sp100 | 363269 | 1,57 | up   |
| 6134101 | 7356958 | 1762108 | SP100 nuclear antigen | Sp100 | 363269 | 1,87 | up   |
| 6148468 | 7356958 | 1762103 | SP100 nuclear antigen | Sp100 | 363269 | 1,44 | up   |
| 6148759 | 7356958 | 1762110 | SP100 nuclear antigen | Sp100 | 363269 | 1,74 | down |
| 6305857 | 7356958 | 1762112 | SP100 nuclear antigen | Sp100 | 363269 | 1,14 | down |
| 6380211 | 7356958 | 1762106 | SP100 nuclear antigen | Sp100 | 363269 | 1,14 | down |
| 6437410 | 7356958 | 1762111 | SP100 nuclear antigen | Sp100 | 363269 | 1,07 | up   |

|         |         |         |                                                                          |        |        |      |      |
|---------|---------|---------|--------------------------------------------------------------------------|--------|--------|------|------|
| 6464672 | 7356958 | 1762107 | SP100 nuclear antigen                                                    | Sp100  | 363269 | 1,19 | down |
| 6541692 | 7356958 | 1762112 | SP100 nuclear antigen                                                    | Sp100  | 363269 | 2,45 | down |
| 5802690 | 7027728 | 956031  | SPARC related modular calcium binding 2                                  | Smoc2  | 292401 | 1,29 | down |
| 5917211 | 7027728 | 956035  | SPARC related modular calcium binding 2                                  | Smoc2  | 292401 | 1,54 | down |
| 5937023 | 7027728 | 956053  | SPARC related modular calcium binding 2                                  | Smoc2  | 292401 | 1,01 | up   |
| 5939421 | 7027728 | 956055  | SPARC related modular calcium binding 2                                  | Smoc2  | 292401 | 1,05 | up   |
| 5952399 | 7027728 | 956041  | SPARC related modular calcium binding 2                                  | Smoc2  | 292401 | 1,59 | down |
| 6010953 | 7027728 | 956040  | SPARC related modular calcium binding 2                                  | Smoc2  | 292401 | 1,21 | up   |
| 6035428 | 7027728 | 956046  | SPARC related modular calcium binding 2                                  | Smoc2  | 292401 | 1,18 | down |
| 6059870 | 7027728 | 956025  | SPARC related modular calcium binding 2                                  | Smoc2  | 292401 | 1,02 | down |
| 6122134 | 7027728 | 956047  | SPARC related modular calcium binding 2                                  | Smoc2  | 292401 | 1,06 | up   |
| 6126048 | 7027728 | 956055  | SPARC related modular calcium binding 2                                  | Smoc2  | 292401 | 1,33 | down |
| 6166817 | 7027728 | 956054  | SPARC related modular calcium binding 2                                  | Smoc2  | 292401 | 1,11 | up   |
| 6237595 | 7027728 | 956050  | SPARC related modular calcium binding 2                                  | Smoc2  | 292401 | 1,05 | up   |
| 6298855 | 7027728 | 956039  | SPARC related modular calcium binding 2                                  | Smoc2  | 292401 | 1,15 | up   |
| 6341675 | 7027728 | 956055  | SPARC related modular calcium binding 2                                  | Smoc2  | 292401 | 1,25 | up   |
| 6518587 | 7027728 | 956055  | SPARC related modular calcium binding 2                                  | Smoc2  | 292401 | 1,01 | down |
| 6518908 | 7027728 | 956055  | SPARC related modular calcium binding 2                                  | Smoc2  | 292401 | 2,18 | up   |
| 6564925 | 7027728 | 956036  | SPARC related modular calcium binding 2                                  | Smoc2  | 292401 | 1,44 | up   |
| 6626688 | 7027728 | 956025  | SPARC related modular calcium binding 2                                  | Smoc2  | 292401 | 1,43 | up   |
| 6675500 | 7027728 | 956055  | SPARC related modular calcium binding 2                                  | Smoc2  | 292401 | 1,08 | down |
| 5641647 | 7155286 | 1263905 | sparc/osteonectin, cwcv and kazal-like domains proteoglycan (testican) 1 | Spock1 | 306759 | 1,09 | down |
| 5670549 | 7155286 | 1263903 | sparc/osteonectin, cwcv and kazal-like domains proteoglycan (testican) 1 | Spock1 | 306759 | 1,05 | down |
| 6047695 | 7155286 | 1263907 | sparc/osteonectin, cwcv and kazal-like domains proteoglycan (testican) 1 | Spock1 | 306759 | 1,00 | up   |
| 6401239 | 7155286 | 1263840 | sparc/osteonectin, cwcv and kazal-like domains proteoglycan (testican) 1 | Spock1 | 306759 | 1,87 | up   |
| 6545756 | 7155286 | 1263906 | sparc/osteonectin, cwcv and kazal-like domains proteoglycan (testican) 1 | Spock1 | 306759 | 1,05 | down |
| 6639717 | 7155286 | 1263908 | sparc/osteonectin, cwcv and kazal-like domains proteoglycan (testican) 1 | Spock1 | 306759 | 1,11 | down |
| 5775726 | 7150497 | 1251781 | sparc/osteonectin, cwcv and kazal-like domains proteoglycan (testican) 3 | Spock3 | 306404 | 1,02 | up   |
| 5864844 | 7150497 | 1251794 | sparc/osteonectin, cwcv and kazal-like domains proteoglycan (testican) 3 | Spock3 | 306404 | 1,33 | up   |
| 5966151 | 7150497 | 1251803 | sparc/osteonectin, cwcv and kazal-like domains proteoglycan (testican) 3 | Spock3 | 306404 | 1,13 | down |
| 6008634 | 7150497 | 1251778 | sparc/osteonectin, cwcv and kazal-like domains proteoglycan (testican) 3 | Spock3 | 306404 | 1,06 | down |
| 6074912 | 7150497 | 1251783 | sparc/osteonectin, cwcv and kazal-like domains proteoglycan (testican) 3 | Spock3 | 306404 | 1,07 | up   |
| 6236293 | 7150497 | 1251783 | sparc/osteonectin, cwcv and kazal-like domains proteoglycan (testican) 3 | Spock3 | 306404 | 1,00 | up   |
| 6278771 | 7150497 | 1251780 | sparc/osteonectin, cwcv and kazal-like domains proteoglycan (testican) 3 | Spock3 | 306404 | 1,03 | up   |
| 6349317 | 7150497 | 1251802 | sparc/osteonectin, cwcv and kazal-like domains proteoglycan (testican) 3 | Spock3 | 306404 | 1,36 | down |
| 6413775 | 7150497 | 1251784 | sparc/osteonectin, cwcv and kazal-like domains proteoglycan (testican) 3 | Spock3 | 306404 | 1,06 | down |
| 6515460 | 7150497 | 1251809 | sparc/osteonectin, cwcv and kazal-like domains proteoglycan (testican) 3 | Spock3 | 306404 | 2,19 | down |
| 6545408 | 7150497 | 1251808 | sparc/osteonectin, cwcv and kazal-like domains proteoglycan (testican) 3 | Spock3 | 306404 | 1,40 | down |
| 6580096 | 7150497 | 1251796 | sparc/osteonectin, cwcv and kazal-like domains proteoglycan (testican) 3 | Spock3 | 306404 | 1,06 | up   |
| 6627386 | 7150497 | 1251808 | sparc/osteonectin, cwcv and kazal-like domains proteoglycan (testican) 3 | Spock3 | 306404 | 1,31 | up   |
| 5893043 | 7194172 | 1361155 | spastic paraplegia 20, spartin (Troyer syndrome) homolog (human)         | Spg20  | 295053 | 1,56 | down |
| 6015769 | 7194172 | 1361158 | spastic paraplegia 20, spartin (Troyer syndrome) homolog (human)         | Spg20  | 295053 | 1,39 | down |
| 6072918 | 7194172 | 1361169 | spastic paraplegia 20, spartin (Troyer syndrome) homolog (human)         | Spg20  | 295053 | 2,26 | down |
| 6234306 | 7194172 | 1361161 | spastic paraplegia 20, spartin (Troyer syndrome) homolog (human)         | Spg20  | 295053 | 1,91 | down |
| 6288053 | 7194172 | 1361162 | spastic paraplegia 20, spartin (Troyer syndrome) homolog (human)         | Spg20  | 295053 | 1,53 | down |
| 6416923 | 7194172 | 1361162 | spastic paraplegia 20, spartin (Troyer syndrome) homolog (human)         | Spg20  | 295053 | 1,96 | down |
| 6525107 | 7194172 | 1361154 | spastic paraplegia 20, spartin (Troyer syndrome) homolog (human)         | Spg20  | 295053 | 1,63 | down |
| 6569294 | 7194172 | 1361169 | spastic paraplegia 20, spartin (Troyer syndrome) homolog (human)         | Spg20  | 295053 | 1,94 | down |
| 6581548 | 7194172 | 1361160 | spastic paraplegia 20, spartin (Troyer syndrome) homolog (human)         | Spg20  | 295053 | 2,12 | down |
| 5738425 | 7337329 | 1712941 | spastic paraplegia 21 homolog (human)                                    | Spg21  | 300791 | 1,13 | up   |
| 6023599 | 7337329 | 1712937 | spastic paraplegia 21 homolog (human)                                    | Spg21  | 300791 | 1,77 | up   |
| 6075950 | 7337329 | 1712934 | spastic paraplegia 21 homolog (human)                                    | Spg21  | 300791 | 2,15 | down |
| 6196596 | 7337329 | 1712939 | spastic paraplegia 21 homolog (human)                                    | Spg21  | 300791 | 1,28 | down |
| 6558010 | 7337329 | 1712935 | spastic paraplegia 21 homolog (human)                                    | Spg21  | 300791 | 1,10 | up   |
| 6575828 | 7337329 | 1712936 | spastic paraplegia 21 homolog (human)                                    | Spg21  | 300791 | 1,29 | up   |
| 6632788 | 7337329 | 1712938 | spastic paraplegia 21 homolog (human)                                    | Spg21  | 300791 | 1,00 | down |

|         |         |         |                                       |       |        |      |      |
|---------|---------|---------|---------------------------------------|-------|--------|------|------|
| 6738785 | 7337329 | 1712940 | spastic paraplegia 21 homolog (human) | Spg21 | 300791 | 1,21 | down |
| 5663090 | 7303635 | 1631442 | spastin                               | Spast | 362700 | 1,90 | down |
| 5704840 | 7303635 | 1631453 | spastin                               | Spast | 362700 | 1,11 | down |
| 5834155 | 7303635 | 1631454 | spastin                               | Spast | 362700 | 1,04 | down |
| 5931981 | 7303635 | 1631445 | spastin                               | Spast | 362700 | 1,02 | up   |
| 5992976 | 7303635 | 1631441 | spastin                               | Spast | 362700 | 2,05 | down |
| 6029682 | 7303635 | 1631441 | spastin                               | Spast | 362700 | 1,07 | down |
| 6135884 | 7303635 | 1631459 | spastin                               | Spast | 362700 | 1,26 | up   |
| 6164068 | 7303635 | 1631452 | spastin                               | Spast | 362700 | 1,11 | down |
| 6209698 | 7303635 | 1631447 | spastin                               | Spast | 362700 | 1,12 | down |
| 6219537 | 7303635 | 1631457 | spastin                               | Spast | 362700 | 1,29 | up   |
| 6235314 | 7303635 | 1631443 | spastin                               | Spast | 362700 | 1,03 | up   |
| 6270793 | 7303635 | 1631456 | spastin                               | Spast | 362700 | 1,09 | down |
| 6320626 | 7303635 | 1631441 | spastin                               | Spast | 362700 | 1,22 | down |
| 6375593 | 7303635 | 1631448 | spastin                               | Spast | 362700 | 1,03 | up   |
| 6416387 | 7303635 | 1631449 | spastin                               | Spast | 362700 | 1,06 | down |
| 6433317 | 7303635 | 1631444 | spastin                               | Spast | 362700 | 1,25 | down |
| 6487804 | 7303635 | 1631459 | spastin                               | Spast | 362700 | 1,37 | down |
| 6519371 | 7303635 | 1631450 | spastin                               | Spast | 362700 | 1,03 | down |
| 6669531 | 7303635 | 1631446 | spastin                               | Spast | 362700 | 1,19 | up   |
| 6695736 | 7303635 | 1631454 | spastin                               | Spast | 362700 | 1,03 | up   |
| 6702463 | 7303635 | 1631459 | spastin                               | Spast | 362700 | 1,17 | up   |
| 5625303 | 7308057 | 1642752 | spectrin, beta, erythrocytic          | Sptb  | 314251 | 1,06 | down |
| 5636288 | 7308057 | 1642778 | spectrin, beta, erythrocytic          | Sptb  | 314251 | 1,71 | down |
| 5664934 | 7308057 | 1642753 | spectrin, beta, erythrocytic          | Sptb  | 314251 | 1,13 | down |
| 5733744 | 7308057 | 1642764 | spectrin, beta, erythrocytic          | Sptb  | 314251 | 1,17 | down |
| 5757252 | 7308057 | 1642781 | spectrin, beta, erythrocytic          | Sptb  | 314251 | 1,54 | up   |
| 5768781 | 7308057 | 1642780 | spectrin, beta, erythrocytic          | Sptb  | 314251 | 1,28 | down |
| 5830704 | 7308057 | 1642779 | spectrin, beta, erythrocytic          | Sptb  | 314251 | 1,24 | down |
| 5854363 | 7308057 | 1642783 | spectrin, beta, erythrocytic          | Sptb  | 314251 | 1,48 | down |
| 5892018 | 7308057 | 1642773 | spectrin, beta, erythrocytic          | Sptb  | 314251 | 1,21 | down |
| 5898158 | 7308057 | 1642765 | spectrin, beta, erythrocytic          | Sptb  | 314251 | 1,40 | up   |
| 5904048 | 7308057 | 1642761 | spectrin, beta, erythrocytic          | Sptb  | 314251 | 1,27 | down |
| 5926660 | 7308057 | 1642771 | spectrin, beta, erythrocytic          | Sptb  | 314251 | 1,42 | down |
| 5941067 | 7308057 | 1642768 | spectrin, beta, erythrocytic          | Sptb  | 314251 | 1,26 | down |
| 5973796 | 7308057 | 1642752 | spectrin, beta, erythrocytic          | Sptb  | 314251 | 2,55 | down |
| 6008202 | 7308057 | 1642762 | spectrin, beta, erythrocytic          | Sptb  | 314251 | 1,04 | down |
| 6046414 | 7308057 | 1642763 | spectrin, beta, erythrocytic          | Sptb  | 314251 | 1,75 | up   |
| 6079881 | 7308057 | 1642755 | spectrin, beta, erythrocytic          | Sptb  | 314251 | 1,07 | down |
| 6107796 | 7308057 | 1642776 | spectrin, beta, erythrocytic          | Sptb  | 314251 | 2,09 | down |
| 6132441 | 7308057 | 1642758 | spectrin, beta, erythrocytic          | Sptb  | 314251 | 1,18 | up   |
| 6161559 | 7308057 | 1642752 | spectrin, beta, erythrocytic          | Sptb  | 314251 | 1,20 | down |
| 6174566 | 7308057 | 1642769 | spectrin, beta, erythrocytic          | Sptb  | 314251 | 1,42 | down |
| 6184380 | 7308057 | 1642775 | spectrin, beta, erythrocytic          | Sptb  | 314251 | 1,12 | down |
| 6282697 | 7308057 | 1642760 | spectrin, beta, erythrocytic          | Sptb  | 314251 | 1,90 | up   |
| 6434404 | 7308057 | 1642772 | spectrin, beta, erythrocytic          | Sptb  | 314251 | 1,38 | down |
| 6494783 | 7308057 | 1642759 | spectrin, beta, erythrocytic          | Sptb  | 314251 | 1,25 | up   |
| 6525896 | 7308057 | 1642782 | spectrin, beta, erythrocytic          | Sptb  | 314251 | 1,03 | down |
| 6554545 | 7308057 | 1642777 | spectrin, beta, erythrocytic          | Sptb  | 314251 | 1,44 | up   |
| 6593001 | 7308057 | 1642774 | spectrin, beta, erythrocytic          | Sptb  | 314251 | 1,80 | up   |
| 6598628 | 7308057 | 1642782 | spectrin, beta, erythrocytic          | Sptb  | 314251 | 1,22 | down |
| 6641993 | 7308057 | 1642770 | spectrin, beta, erythrocytic          | Sptb  | 314251 | 1,23 | down |
| 6648399 | 7308057 | 1642754 | spectrin, beta, erythrocytic          | Sptb  | 314251 | 1,33 | down |
| 6653530 | 7308057 | 1642766 | spectrin, beta, erythrocytic          | Sptb  | 314251 | 1,06 | up   |
| 6654665 | 7308057 | 1642767 | spectrin, beta, erythrocytic          | Sptb  | 314251 | 1,00 | down |
| 6706983 | 7308057 | 1642756 | spectrin, beta, erythrocytic          | Sptb  | 314251 | 1,40 | up   |

|         |         |         |                                    |         |        |      |      |
|---------|---------|---------|------------------------------------|---------|--------|------|------|
| 6730368 | 7308057 | 1642757 | spectrin, beta, erythrocytic       | Sptb    | 314251 | 1,02 | down |
| 6376327 | 7243647 | 1482487 | spectrin, beta, non-erythrocytic 5 | Sptbn5  | 296090 | 1,28 | up   |
| 5625560 | 7316192 | 1662685 | sperm associated antigen 1         | Spag1   | 315033 | 1,51 | down |
| 5827635 | 7316192 | 1662688 | sperm associated antigen 1         | Spag1   | 315033 | 1,55 | up   |
| 5831923 | 7316192 | 1662678 | sperm associated antigen 1         | Spag1   | 315033 | 1,05 | up   |
| 5859706 | 7316192 | 1662693 | sperm associated antigen 1         | Spag1   | 315033 | 1,54 | down |
| 5899064 | 7316192 | 1662684 | sperm associated antigen 1         | Spag1   | 315033 | 1,51 | up   |
| 5906624 | 7316192 | 1662687 | sperm associated antigen 1         | Spag1   | 315033 | 1,46 | up   |
| 5948265 | 7316192 | 1662680 | sperm associated antigen 1         | Spag1   | 315033 | 1,32 | up   |
| 5949824 | 7316192 | 1662689 | sperm associated antigen 1         | Spag1   | 315033 | 1,14 | up   |
| 5956497 | 7316192 | 1662677 | sperm associated antigen 1         | Spag1   | 315033 | 1,00 | down |
| 6042567 | 7316192 | 1662695 | sperm associated antigen 1         | Spag1   | 315033 | 1,74 | down |
| 6154490 | 7316192 | 1662692 | sperm associated antigen 1         | Spag1   | 315033 | 1,03 | up   |
| 6164102 | 7316192 | 1662686 | sperm associated antigen 1         | Spag1   | 315033 | 1,15 | down |
| 6250669 | 7316192 | 1662696 | sperm associated antigen 1         | Spag1   | 315033 | 1,37 | down |
| 6319623 | 7316192 | 1662694 | sperm associated antigen 1         | Spag1   | 315033 | 2,00 | down |
| 6419685 | 7316192 | 1662681 | sperm associated antigen 1         | Spag1   | 315033 | 1,03 | down |
| 6479551 | 7316192 | 1662682 | sperm associated antigen 1         | Spag1   | 315033 | 1,64 | up   |
| 6621038 | 7316192 | 1662683 | sperm associated antigen 1         | Spag1   | 315033 | 1,41 | up   |
| 6632774 | 7316192 | 1662679 | sperm associated antigen 1         | Spag1   | 315033 | 1,02 | up   |
| 6663112 | 7316192 | 1662690 | sperm associated antigen 1         | Spag1   | 315033 | 1,71 | down |
| 6704150 | 7316192 | 1662691 | sperm associated antigen 1         | Spag1   | 315033 | 1,52 | up   |
| 5693779 | 7124981 | 1189244 | spermatogenesis associated 18      | Spata18 | 289586 | 1,26 | down |
| 5744176 | 7124981 | 1189232 | spermatogenesis associated 18      | Spata18 | 289586 | 1,71 | down |
| 5773869 | 7124981 | 1189243 | spermatogenesis associated 18      | Spata18 | 289586 | 1,36 | up   |
| 5874023 | 7124981 | 1189234 | spermatogenesis associated 18      | Spata18 | 289586 | 1,52 | down |
| 5876654 | 7124981 | 1189237 | spermatogenesis associated 18      | Spata18 | 289586 | 1,71 | down |
| 6027979 | 7124981 | 1189238 | spermatogenesis associated 18      | Spata18 | 289586 | 1,13 | down |
| 6071929 | 7124981 | 1189233 | spermatogenesis associated 18      | Spata18 | 289586 | 1,30 | up   |
| 6177173 | 7124981 | 1189237 | spermatogenesis associated 18      | Spata18 | 289586 | 1,73 | up   |
| 6191116 | 7124981 | 1189241 | spermatogenesis associated 18      | Spata18 | 289586 | 1,04 | down |
| 6211835 | 7124981 | 1189242 | spermatogenesis associated 18      | Spata18 | 289586 | 1,38 | down |
| 6402061 | 7124981 | 1189233 | spermatogenesis associated 18      | Spata18 | 289586 | 1,15 | down |
| 6475540 | 7124981 | 1189235 | spermatogenesis associated 18      | Spata18 | 289586 | 1,28 | up   |
| 6530424 | 7124981 | 1189239 | spermatogenesis associated 18      | Spata18 | 289586 | 1,73 | up   |
| 6554678 | 7124981 | 1189238 | spermatogenesis associated 18      | Spata18 | 289586 | 1,61 | up   |
| 6576503 | 7124981 | 1189244 | spermatogenesis associated 18      | Spata18 | 289586 | 1,38 | up   |
| 6629619 | 7124981 | 1189240 | spermatogenesis associated 18      | Spata18 | 289586 | 1,60 | up   |
| 6721792 | 7124981 | 1189244 | spermatogenesis associated 18      | Spata18 | 289586 | 2,12 | up   |
| 6741462 | 7124981 | 1189236 | spermatogenesis associated 18      | Spata18 | 289586 | 1,26 | up   |
| 5689130 | 7081731 | 1083301 | spermatogenesis associated 20      | Spata20 | 360604 | 1,43 | up   |
| 5696271 | 7081731 | 1083297 | spermatogenesis associated 20      | Spata20 | 360604 | 1,60 | down |
| 5843982 | 7081731 | 1083304 | spermatogenesis associated 20      | Spata20 | 360604 | 1,50 | up   |
| 5872933 | 7081731 | 1083303 | spermatogenesis associated 20      | Spata20 | 360604 | 1,03 | down |
| 5897719 | 7081731 | 1083298 | spermatogenesis associated 20      | Spata20 | 360604 | 1,08 | down |
| 5936284 | 7081731 | 1083293 | spermatogenesis associated 20      | Spata20 | 360604 | 1,19 | up   |
| 5965767 | 7081731 | 1083300 | spermatogenesis associated 20      | Spata20 | 360604 | 1,25 | up   |
| 5990251 | 7081731 | 1083296 | spermatogenesis associated 20      | Spata20 | 360604 | 1,05 | up   |
| 5994243 | 7081731 | 1083294 | spermatogenesis associated 20      | Spata20 | 360604 | 1,46 | up   |
| 6066755 | 7081731 | 1083307 | spermatogenesis associated 20      | Spata20 | 360604 | 1,16 | down |
| 6164942 | 7081731 | 1083295 | spermatogenesis associated 20      | Spata20 | 360604 | 2,10 | down |
| 6216626 | 7081731 | 1083307 | spermatogenesis associated 20      | Spata20 | 360604 | 1,11 | up   |
| 6235752 | 7081731 | 1083292 | spermatogenesis associated 20      | Spata20 | 360604 | 1,02 | up   |
| 6335800 | 7081731 | 1083308 | spermatogenesis associated 20      | Spata20 | 360604 | 1,13 | up   |
| 6376717 | 7081731 | 1083302 | spermatogenesis associated 20      | Spata20 | 360604 | 1,05 | up   |
| 6384838 | 7081731 | 1083305 | spermatogenesis associated 20      | Spata20 | 360604 | 1,49 | up   |

|         |         |         |                                             |         |        |      |      |
|---------|---------|---------|---------------------------------------------|---------|--------|------|------|
| 6403016 | 7081731 | 1083296 | spermatogenesis associated 20               | Spata20 | 360604 | 1,40 | down |
| 6420084 | 7081731 | 1083299 | spermatogenesis associated 20               | Spata20 | 360604 | 1,77 | down |
| 6513274 | 7081731 | 1083308 | spermatogenesis associated 20               | Spata20 | 360604 | 1,31 | down |
| 6522605 | 7081731 | 1083306 | spermatogenesis associated 20               | Spata20 | 360604 | 1,16 | up   |
| 5641295 | 7281086 | 1575597 | spermatogenesis associated 21               | Spata21 | 366491 | 1,31 | up   |
| 5663294 | 7281086 | 1575599 | spermatogenesis associated 21               | Spata21 | 366491 | 1,01 | down |
| 5742582 | 7281086 | 1575595 | spermatogenesis associated 21               | Spata21 | 366491 | 1,29 | up   |
| 5796804 | 7281086 | 1575598 | spermatogenesis associated 21               | Spata21 | 366491 | 1,26 | down |
| 5804122 | 7281086 | 1575598 | spermatogenesis associated 21               | Spata21 | 366491 | 1,58 | up   |
| 5805069 | 7281086 | 1575594 | spermatogenesis associated 21               | Spata21 | 366491 | 1,25 | up   |
| 6040647 | 7281086 | 1575586 | spermatogenesis associated 21               | Spata21 | 366491 | 1,33 | down |
| 6101676 | 7281086 | 1575599 | spermatogenesis associated 21               | Spata21 | 366491 | 1,04 | up   |
| 6121645 | 7281086 | 1575593 | spermatogenesis associated 21               | Spata21 | 366491 | 1,12 | up   |
| 6132862 | 7281086 | 1575590 | spermatogenesis associated 21               | Spata21 | 366491 | 1,63 | down |
| 6184158 | 7281086 | 1575592 | spermatogenesis associated 21               | Spata21 | 366491 | 1,00 | up   |
| 6196495 | 7281086 | 1575589 | spermatogenesis associated 21               | Spata21 | 366491 | 1,52 | up   |
| 6251373 | 7281086 | 1575588 | spermatogenesis associated 21               | Spata21 | 366491 | 1,03 | down |
| 6311370 | 7281086 | 1575592 | spermatogenesis associated 21               | Spata21 | 366491 | 2,01 | down |
| 6316397 | 7281086 | 1575596 | spermatogenesis associated 21               | Spata21 | 366491 | 1,04 | down |
| 6330897 | 7281086 | 1575599 | spermatogenesis associated 21               | Spata21 | 366491 | 1,50 | down |
| 6336722 | 7281086 | 1575585 | spermatogenesis associated 21               | Spata21 | 366491 | 1,32 | up   |
| 6485714 | 7281086 | 1575592 | spermatogenesis associated 21               | Spata21 | 366491 | 1,09 | down |
| 6494831 | 7281086 | 1575598 | spermatogenesis associated 21               | Spata21 | 366491 | 1,01 | up   |
| 6520227 | 7281086 | 1575588 | spermatogenesis associated 21               | Spata21 | 366491 | 1,06 | down |
| 6560339 | 7281086 | 1575589 | spermatogenesis associated 21               | Spata21 | 366491 | 1,02 | down |
| 6634790 | 7281086 | 1575587 | spermatogenesis associated 21               | Spata21 | 366491 | 1,14 | up   |
| 6721469 | 7281086 | 1575591 | spermatogenesis associated 21               | Spata21 | 366491 | 1,48 | up   |
| 5737387 | 7352152 | 1750342 | spermatogenesis associated, serine-rich 1   | Spats1  | 301255 | 1,14 | down |
| 5893453 | 7352152 | 1750340 | spermatogenesis associated, serine-rich 1   | Spats1  | 301255 | 1,26 | up   |
| 5997275 | 7352152 | 1750339 | spermatogenesis associated, serine-rich 1   | Spats1  | 301255 | 1,04 | down |
| 6029778 | 7352152 | 1750337 | spermatogenesis associated, serine-rich 1   | Spats1  | 301255 | 1,35 | down |
| 6046940 | 7352152 | 1750338 | spermatogenesis associated, serine-rich 1   | Spats1  | 301255 | 1,17 | up   |
| 6049738 | 7352152 | 1750336 | spermatogenesis associated, serine-rich 1   | Spats1  | 301255 | 1,01 | up   |
| 6078624 | 7352152 | 1750337 | spermatogenesis associated, serine-rich 1   | Spats1  | 301255 | 1,03 | up   |
| 6429032 | 7352152 | 1750342 | spermatogenesis associated, serine-rich 1   | Spats1  | 301255 | 1,39 | down |
| 6660757 | 7352152 | 1750341 | spermatogenesis associated, serine-rich 1   | Spats1  | 301255 | 1,17 | up   |
| 5673765 | 7375057 | 1809524 | spermidine/spermine N1-acetyl transferase 1 | Sat1    | 302642 | 1,27 | down |
| 5897036 | 7375057 | 1809527 | spermidine/spermine N1-acetyl transferase 1 | Sat1    | 302642 | 1,59 | down |
| 5905463 | 7375057 | 1809523 | spermidine/spermine N1-acetyl transferase 1 | Sat1    | 302642 | 1,88 | down |
| 5928129 | 7375057 | 1809523 | spermidine/spermine N1-acetyl transferase 1 | Sat1    | 302642 | 2,14 | up   |
| 5938772 | 7375057 | 1809523 | spermidine/spermine N1-acetyl transferase 1 | Sat1    | 302642 | 1,35 | up   |
| 5990690 | 7375057 | 1809526 | spermidine/spermine N1-acetyl transferase 1 | Sat1    | 302642 | 1,24 | up   |
| 6035598 | 7375057 | 1809529 | spermidine/spermine N1-acetyl transferase 1 | Sat1    | 302642 | 1,13 | up   |
| 6533692 | 7375057 | 1809525 | spermidine/spermine N1-acetyl transferase 1 | Sat1    | 302642 | 1,37 | down |
| 6575714 | 7375057 | 1809528 | spermidine/spermine N1-acetyl transferase 1 | Sat1    | 302642 | 1,19 | up   |
| 5930222 | 7342926 | 1727280 | sphingosine-1-phosphate receptor 2          | S1pr2   | 29415  | 1,08 | down |
| 6118069 | 7342926 | 1727281 | sphingosine-1-phosphate receptor 2          | S1pr2   | 29415  | 1,22 | down |
| 6321786 | 7342926 | 1727281 | sphingosine-1-phosphate receptor 2          | S1pr2   | 29415  | 1,39 | down |
| 6434564 | 7342926 | 1727281 | sphingosine-1-phosphate receptor 2          | S1pr2   | 29415  | 1,55 | up   |
| 6435762 | 7342926 | 1727281 | sphingosine-1-phosphate receptor 2          | S1pr2   | 29415  | 2,54 | down |
| 6465032 | 7342926 | 1727280 | sphingosine-1-phosphate receptor 2          | S1pr2   | 29415  | 1,11 | down |
| 6469398 | 7342926 | 1727280 | sphingosine-1-phosphate receptor 2          | S1pr2   | 29415  | 1,82 | up   |
| 5646448 | 7198325 | 1371331 | spindle assembly 6 homolog (C. elegans)     | Sass6   | 310807 | 1,07 | down |
| 5666201 | 7198325 | 1371344 | spindle assembly 6 homolog (C. elegans)     | Sass6   | 310807 | 1,04 | down |
| 5666485 | 7198325 | 1371345 | spindle assembly 6 homolog (C. elegans)     | Sass6   | 310807 | 1,19 | up   |
| 5723719 | 7198325 | 1371343 | spindle assembly 6 homolog (C. elegans)     | Sass6   | 310807 | 1,22 | down |

|         |         |         |                                         |        |        |      |      |
|---------|---------|---------|-----------------------------------------|--------|--------|------|------|
| 5724624 | 7198325 | 1371336 | spindle assembly 6 homolog (C. elegans) | Sass6  | 310807 | 1,18 | up   |
| 5847823 | 7198325 | 1371342 | spindle assembly 6 homolog (C. elegans) | Sass6  | 310807 | 1,15 | down |
| 5928035 | 7198325 | 1371337 | spindle assembly 6 homolog (C. elegans) | Sass6  | 310807 | 1,21 | up   |
| 6071319 | 7198325 | 1371339 | spindle assembly 6 homolog (C. elegans) | Sass6  | 310807 | 1,20 | down |
| 6134639 | 7198325 | 1371340 | spindle assembly 6 homolog (C. elegans) | Sass6  | 310807 | 1,26 | down |
| 6265582 | 7198325 | 1371338 | spindle assembly 6 homolog (C. elegans) | Sass6  | 310807 | 1,15 | up   |
| 6438502 | 7198325 | 1371335 | spindle assembly 6 homolog (C. elegans) | Sass6  | 310807 | 1,20 | up   |
| 6500722 | 7198325 | 1371346 | spindle assembly 6 homolog (C. elegans) | Sass6  | 310807 | 1,41 | up   |
| 6530431 | 7198325 | 1371349 | spindle assembly 6 homolog (C. elegans) | Sass6  | 310807 | 1,23 | up   |
| 6606867 | 7198325 | 1371348 | spindle assembly 6 homolog (C. elegans) | Sass6  | 310807 | 1,09 | down |
| 6660728 | 7198325 | 1371341 | spindle assembly 6 homolog (C. elegans) | Sass6  | 310807 | 1,04 | up   |
| 5695165 | 7181871 | 1330182 | spire homolog 2 (Drosophila)            | Spire2 | 307925 | 1,08 | down |
| 5764556 | 7181871 | 1330179 | spire homolog 2 (Drosophila)            | Spire2 | 307925 | 1,16 | down |
| 5803453 | 7181871 | 1330178 | spire homolog 2 (Drosophila)            | Spire2 | 307925 | 1,12 | up   |
| 5808579 | 7181871 | 1330184 | spire homolog 2 (Drosophila)            | Spire2 | 307925 | 1,57 | down |
| 5937644 | 7181871 | 1330167 | spire homolog 2 (Drosophila)            | Spire2 | 307925 | 1,23 | down |
| 6068149 | 7181871 | 1330169 | spire homolog 2 (Drosophila)            | Spire2 | 307925 | 1,05 | down |
| 6178041 | 7181871 | 1330185 | spire homolog 2 (Drosophila)            | Spire2 | 307925 | 1,36 | up   |
| 6180407 | 7181871 | 1330186 | spire homolog 2 (Drosophila)            | Spire2 | 307925 | 1,04 | down |
| 6218705 | 7181871 | 1330183 | spire homolog 2 (Drosophila)            | Spire2 | 307925 | 1,02 | down |
| 6224968 | 7181871 | 1330179 | spire homolog 2 (Drosophila)            | Spire2 | 307925 | 1,24 | down |
| 6269488 | 7181871 | 1330176 | spire homolog 2 (Drosophila)            | Spire2 | 307925 | 1,01 | up   |
| 6347840 | 7181871 | 1330180 | spire homolog 2 (Drosophila)            | Spire2 | 307925 | 1,07 | up   |
| 6445527 | 7181871 | 1330186 | spire homolog 2 (Drosophila)            | Spire2 | 307925 | 1,15 | up   |
| 6452972 | 7181871 | 1330175 | spire homolog 2 (Drosophila)            | Spire2 | 307925 | 1,67 | up   |
| 6582541 | 7181871 | 1330177 | spire homolog 2 (Drosophila)            | Spire2 | 307925 | 1,26 | up   |
| 6609010 | 7181871 | 1330167 | spire homolog 2 (Drosophila)            | Spire2 | 307925 | 1,06 | up   |
| 6617527 | 7181871 | 1330173 | spire homolog 2 (Drosophila)            | Spire2 | 307925 | 1,30 | down |
| 6661299 | 7181871 | 1330174 | spire homolog 2 (Drosophila)            | Spire2 | 307925 | 2,18 | up   |
| 6681637 | 7181871 | 1330177 | spire homolog 2 (Drosophila)            | Spire2 | 307925 | 1,72 | up   |
| 6720972 | 7181871 | 1330167 | spire homolog 2 (Drosophila)            | Spire2 | 307925 | 1,49 | down |
| 5621509 | 7162313 | 1280960 | spleen tyrosine kinase                  | Syk    | 25155  | 1,03 | up   |
| 5630146 | 7162313 | 1280973 | spleen tyrosine kinase                  | Syk    | 25155  | 1,38 | down |
| 5670021 | 7162313 | 1280962 | spleen tyrosine kinase                  | Syk    | 25155  | 1,06 | up   |
| 5700064 | 7162313 | 1280961 | spleen tyrosine kinase                  | Syk    | 25155  | 1,18 | up   |
| 5767781 | 7162313 | 1280966 | spleen tyrosine kinase                  | Syk    | 25155  | 1,33 | down |
| 5795125 | 7162313 | 1280973 | spleen tyrosine kinase                  | Syk    | 25155  | 1,08 | up   |
| 5818911 | 7162313 | 1280965 | spleen tyrosine kinase                  | Syk    | 25155  | 2,04 | down |
| 5942002 | 7162313 | 1280971 | spleen tyrosine kinase                  | Syk    | 25155  | 1,29 | up   |
| 6052895 | 7162313 | 1280972 | spleen tyrosine kinase                  | Syk    | 25155  | 1,02 | up   |
| 6067454 | 7162313 | 1280974 | spleen tyrosine kinase                  | Syk    | 25155  | 1,15 | down |
| 6081317 | 7162313 | 1280964 | spleen tyrosine kinase                  | Syk    | 25155  | 1,30 | down |
| 6138883 | 7162313 | 1280969 | spleen tyrosine kinase                  | Syk    | 25155  | 1,01 | down |
| 6204547 | 7162313 | 1280963 | spleen tyrosine kinase                  | Syk    | 25155  | 1,43 | down |
| 6278184 | 7162313 | 1280967 | spleen tyrosine kinase                  | Syk    | 25155  | 1,06 | up   |
| 6452839 | 7162313 | 1280959 | spleen tyrosine kinase                  | Syk    | 25155  | 1,75 | up   |
| 6564534 | 7162313 | 1280968 | spleen tyrosine kinase                  | Syk    | 25155  | 1,43 | down |
| 6599639 | 7162313 | 1280970 | spleen tyrosine kinase                  | Syk    | 25155  | 1,15 | up   |
| 6614830 | 7162313 | 1280972 | spleen tyrosine kinase                  | Syk    | 25155  | 1,20 | down |
| 5769823 | 7059721 | 1030860 | splicing factor 3b, subunit 2           | Sf3b2  | 293671 | 1,04 | down |
| 5811626 | 7059721 | 1030866 | splicing factor 3b, subunit 2           | Sf3b2  | 293671 | 1,29 | up   |
| 5868335 | 7059721 | 1030849 | splicing factor 3b, subunit 2           | Sf3b2  | 293671 | 1,10 | up   |
| 5894483 | 7059721 | 1030862 | splicing factor 3b, subunit 2           | Sf3b2  | 293671 | 1,24 | down |
| 5902262 | 7059721 | 1030858 | splicing factor 3b, subunit 2           | Sf3b2  | 293671 | 1,10 | up   |
| 6157425 | 7059721 | 1030851 | splicing factor 3b, subunit 2           | Sf3b2  | 293671 | 1,05 | down |
| 6198128 | 7059721 | 1030859 | splicing factor 3b, subunit 2           | Sf3b2  | 293671 | 1,11 | up   |

|         |         |         |                                                                                      |        |        |      |      |
|---------|---------|---------|--------------------------------------------------------------------------------------|--------|--------|------|------|
| 6258953 | 7059721 | 1030848 | splicing factor 3b, subunit 2                                                        | Sf3b2  | 293671 | 1,11 | up   |
| 6335249 | 7059721 | 1030850 | splicing factor 3b, subunit 2                                                        | Sf3b2  | 293671 | 1,15 | down |
| 6358068 | 7059721 | 1030855 | splicing factor 3b, subunit 2                                                        | Sf3b2  | 293671 | 1,15 | up   |
| 6375244 | 7059721 | 1030861 | splicing factor 3b, subunit 2                                                        | Sf3b2  | 293671 | 1,00 | down |
| 6417011 | 7059721 | 1030846 | splicing factor 3b, subunit 2                                                        | Sf3b2  | 293671 | 1,23 | down |
| 6425765 | 7059721 | 1030863 | splicing factor 3b, subunit 2                                                        | Sf3b2  | 293671 | 1,03 | up   |
| 6451871 | 7059721 | 1030846 | splicing factor 3b, subunit 2                                                        | Sf3b2  | 293671 | 2,57 | down |
| 6466184 | 7059721 | 1030857 | splicing factor 3b, subunit 2                                                        | Sf3b2  | 293671 | 1,03 | up   |
| 6533510 | 7059721 | 1030854 | splicing factor 3b, subunit 2                                                        | Sf3b2  | 293671 | 1,02 | down |
| 6570886 | 7059721 | 1030852 | splicing factor 3b, subunit 2                                                        | Sf3b2  | 293671 | 1,11 | down |
| 6577008 | 7059721 | 1030847 | splicing factor 3b, subunit 2                                                        | Sf3b2  | 293671 | 1,25 | up   |
| 6599027 | 7059721 | 1030865 | splicing factor 3b, subunit 2                                                        | Sf3b2  | 293671 | 1,16 | up   |
| 6617451 | 7059721 | 1030866 | splicing factor 3b, subunit 2                                                        | Sf3b2  | 293671 | 1,13 | down |
| 6618087 | 7059721 | 1030864 | splicing factor 3b, subunit 2                                                        | Sf3b2  | 293671 | 1,11 | down |
| 6635829 | 7059721 | 1030856 | splicing factor 3b, subunit 2                                                        | Sf3b2  | 293671 | 1,22 | up   |
| 5647938 | 7279586 | 1572064 | splicing factor proline/glutamine rich (polypyrimidine tract binding protein associ. | Sfpq   | 252855 | 1,10 | down |
| 5759334 | 7279586 | 1572072 | splicing factor proline/glutamine rich (polypyrimidine tract binding protein associ. | Sfpq   | 252855 | 1,01 | down |
| 5866405 | 7279586 | 1572063 | splicing factor proline/glutamine rich (polypyrimidine tract binding protein associ. | Sfpq   | 252855 | 1,11 | down |
| 5907575 | 7279586 | 1572063 | splicing factor proline/glutamine rich (polypyrimidine tract binding protein associ. | Sfpq   | 252855 | 1,14 | up   |
| 5921405 | 7279586 | 1572063 | splicing factor proline/glutamine rich (polypyrimidine tract binding protein associ. | Sfpq   | 252855 | 1,77 | up   |
| 5950964 | 7279586 | 1572065 | splicing factor proline/glutamine rich (polypyrimidine tract binding protein associ. | Sfpq   | 252855 | 1,14 | up   |
| 6003954 | 7279586 | 1572069 | splicing factor proline/glutamine rich (polypyrimidine tract binding protein associ. | Sfpq   | 252855 | 1,21 | up   |
| 6074011 | 7279586 | 1572067 | splicing factor proline/glutamine rich (polypyrimidine tract binding protein associ. | Sfpq   | 252855 | 1,58 | up   |
| 6155067 | 7279586 | 1572061 | splicing factor proline/glutamine rich (polypyrimidine tract binding protein associ. | Sfpq   | 252855 | 1,14 | up   |
| 6227086 | 7279586 | 1572072 | splicing factor proline/glutamine rich (polypyrimidine tract binding protein associ. | Sfpq   | 252855 | 1,13 | up   |
| 6285276 | 7279586 | 1572066 | splicing factor proline/glutamine rich (polypyrimidine tract binding protein associ. | Sfpq   | 252855 | 1,14 | down |
| 6317431 | 7279586 | 1572071 | splicing factor proline/glutamine rich (polypyrimidine tract binding protein associ. | Sfpq   | 252855 | 1,17 | down |
| 6361044 | 7279586 | 1572070 | splicing factor proline/glutamine rich (polypyrimidine tract binding protein associ. | Sfpq   | 252855 | 1,10 | down |
| 6402596 | 7279586 | 1572072 | splicing factor proline/glutamine rich (polypyrimidine tract binding protein associ. | Sfpq   | 252855 | 1,02 | down |
| 6426032 | 7279586 | 1572063 | splicing factor proline/glutamine rich (polypyrimidine tract binding protein associ. | Sfpq   | 252855 | 1,14 | up   |
| 6431744 | 7279586 | 1572068 | splicing factor proline/glutamine rich (polypyrimidine tract binding protein associ. | Sfpq   | 252855 | 1,19 | up   |
| 6445171 | 7279586 | 1572063 | splicing factor proline/glutamine rich (polypyrimidine tract binding protein associ. | Sfpq   | 252855 | 1,31 | down |
| 6500807 | 7279586 | 1572063 | splicing factor proline/glutamine rich (polypyrimidine tract binding protein associ. | Sfpq   | 252855 | 1,25 | down |
| 5635868 | 7216132 | 1413396 | splicing factor, arginine/serine-rich 11                                             | Sfrs11 | 502603 | 1,03 | down |
| 5871869 | 7216132 | 1413391 | splicing factor, arginine/serine-rich 11                                             | Sfrs11 | 502603 | 1,17 | down |
| 5948227 | 7216132 | 1413400 | splicing factor, arginine/serine-rich 11                                             | Sfrs11 | 502603 | 1,46 | down |
| 5994013 | 7216132 | 1413392 | splicing factor, arginine/serine-rich 11                                             | Sfrs11 | 502603 | 1,17 | down |
| 6021190 | 7216132 | 1413395 | splicing factor, arginine/serine-rich 11                                             | Sfrs11 | 502603 | 1,10 | down |
| 6076441 | 7216132 | 1413390 | splicing factor, arginine/serine-rich 11                                             | Sfrs11 | 502603 | 1,07 | down |
| 6099547 | 7216132 | 1413387 | splicing factor, arginine/serine-rich 11                                             | Sfrs11 | 502603 | 1,03 | up   |
| 6206424 | 7216132 | 1413397 | splicing factor, arginine/serine-rich 11                                             | Sfrs11 | 502603 | 1,12 | down |
| 6253880 | 7216132 | 1413393 | splicing factor, arginine/serine-rich 11                                             | Sfrs11 | 502603 | 1,03 | down |
| 6258410 | 7216132 | 1413388 | splicing factor, arginine/serine-rich 11                                             | Sfrs11 | 502603 | 1,02 | down |
| 6503480 | 7216132 | 1413399 | splicing factor, arginine/serine-rich 11                                             | Sfrs11 | 502603 | 1,34 | up   |
| 6530126 | 7216132 | 1413400 | splicing factor, arginine/serine-rich 11                                             | Sfrs11 | 502603 | 1,32 | up   |
| 6699428 | 7216132 | 1413398 | splicing factor, arginine/serine-rich 11                                             | Sfrs11 | 502603 | 1,02 | up   |
| 5666461 | 7086664 | 1094291 | splicing factor, arginine/serine-rich 15                                             | Sfrs15 | 245924 | 1,56 | up   |
| 5668222 | 7086664 | 1094270 | splicing factor, arginine/serine-rich 15                                             | Sfrs15 | 245924 | 1,24 | up   |
| 5693919 | 7086664 | 1094281 | splicing factor, arginine/serine-rich 15                                             | Sfrs15 | 245924 | 1,27 | up   |
| 5711049 | 7086664 | 1094286 | splicing factor, arginine/serine-rich 15                                             | Sfrs15 | 245924 | 1,13 | down |
| 5720883 | 7086664 | 1094279 | splicing factor, arginine/serine-rich 15                                             | Sfrs15 | 245924 | 1,11 | down |
| 5731753 | 7086664 | 1094287 | splicing factor, arginine/serine-rich 15                                             | Sfrs15 | 245924 | 1,11 | up   |
| 5835523 | 7086664 | 1094283 | splicing factor, arginine/serine-rich 15                                             | Sfrs15 | 245924 | 1,20 | down |
| 5937404 | 7086664 | 1094284 | splicing factor, arginine/serine-rich 15                                             | Sfrs15 | 245924 | 2,72 | down |
| 5985889 | 7086664 | 1094269 | splicing factor, arginine/serine-rich 15                                             | Sfrs15 | 245924 | 1,20 | up   |
| 6024990 | 7086664 | 1094277 | splicing factor, arginine/serine-rich 15                                             | Sfrs15 | 245924 | 1,05 | up   |



|         |         |         |                                          |        |        |      |      |
|---------|---------|---------|------------------------------------------|--------|--------|------|------|
| 6077988 | 7086664 | 1094272 | splicing factor, arginine/serine-rich 15 | Sfrs15 | 245924 | 1,05 | down |
| 6081695 | 7086664 | 1094291 | splicing factor, arginine/serine-rich 15 | Sfrs15 | 245924 | 1,16 | down |
| 6088008 | 7086664 | 1094278 | splicing factor, arginine/serine-rich 15 | Sfrs15 | 245924 | 1,09 | up   |
| 6127259 | 7086664 | 1094267 | splicing factor, arginine/serine-rich 15 | Sfrs15 | 245924 | 1,34 | down |
| 6135294 | 7086664 | 1094267 | splicing factor, arginine/serine-rich 15 | Sfrs15 | 245924 | 1,28 | down |
| 6242723 | 7086664 | 1094263 | splicing factor, arginine/serine-rich 15 | Sfrs15 | 245924 | 1,10 | down |
| 6310059 | 7086664 | 1094282 | splicing factor, arginine/serine-rich 15 | Sfrs15 | 245924 | 1,09 | up   |
| 6327826 | 7086664 | 1094285 | splicing factor, arginine/serine-rich 15 | Sfrs15 | 245924 | 1,05 | up   |
| 6340009 | 7086664 | 1094291 | splicing factor, arginine/serine-rich 15 | Sfrs15 | 245924 | 1,01 | down |
| 6370674 | 7086664 | 1094280 | splicing factor, arginine/serine-rich 15 | Sfrs15 | 245924 | 1,07 | down |
| 6385833 | 7086664 | 1094263 | splicing factor, arginine/serine-rich 15 | Sfrs15 | 245924 | 1,04 | up   |
| 6422815 | 7086664 | 1094271 | splicing factor, arginine/serine-rich 15 | Sfrs15 | 245924 | 1,04 | up   |
| 6485055 | 7086664 | 1094284 | splicing factor, arginine/serine-rich 15 | Sfrs15 | 245924 | 1,01 | down |
| 6486396 | 7086664 | 1094280 | splicing factor, arginine/serine-rich 15 | Sfrs15 | 245924 | 1,16 | down |
| 6577654 | 7086664 | 1094276 | splicing factor, arginine/serine-rich 15 | Sfrs15 | 245924 | 1,16 | down |
| 6589695 | 7086664 | 1094268 | splicing factor, arginine/serine-rich 15 | Sfrs15 | 245924 | 1,11 | down |
| 6660041 | 7086664 | 1094292 | splicing factor, arginine/serine-rich 15 | Sfrs15 | 245924 | 1,42 | down |
| 5660413 | 7273244 | 1555932 | splicing factor, arginine/serine-rich 18 | Sfrs18 | 297942 | 1,01 | down |
| 5777820 | 7273244 | 1555932 | splicing factor, arginine/serine-rich 18 | Sfrs18 | 297942 | 1,12 | down |
| 5816776 | 7273244 | 1555933 | splicing factor, arginine/serine-rich 18 | Sfrs18 | 297942 | 1,06 | down |
| 5858933 | 7273244 | 1555933 | splicing factor, arginine/serine-rich 18 | Sfrs18 | 297942 | 1,12 | up   |
| 5897788 | 7273244 | 1555933 | splicing factor, arginine/serine-rich 18 | Sfrs18 | 297942 | 1,02 | up   |
| 5914542 | 7273244 | 1555931 | splicing factor, arginine/serine-rich 18 | Sfrs18 | 297942 | 1,16 | up   |
| 6074543 | 7273244 | 1555933 | splicing factor, arginine/serine-rich 18 | Sfrs18 | 297942 | 1,09 | down |
| 6081801 | 7273244 | 1555933 | splicing factor, arginine/serine-rich 18 | Sfrs18 | 297942 | 2,11 | down |
| 6091052 | 7273244 | 1555932 | splicing factor, arginine/serine-rich 18 | Sfrs18 | 297942 | 1,21 | up   |
| 6096776 | 7273244 | 1555932 | splicing factor, arginine/serine-rich 18 | Sfrs18 | 297942 | 2,13 | up   |
| 6378051 | 7273244 | 1555934 | splicing factor, arginine/serine-rich 18 | Sfrs18 | 297942 | 1,56 | up   |
| 6382717 | 7273244 | 1555931 | splicing factor, arginine/serine-rich 18 | Sfrs18 | 297942 | 1,06 | up   |
| 6461130 | 7273244 | 1555933 | splicing factor, arginine/serine-rich 18 | Sfrs18 | 297942 | 1,08 | down |
| 6472098 | 7273244 | 1555934 | splicing factor, arginine/serine-rich 18 | Sfrs18 | 297942 | 2,39 | down |
| 5633937 | 7302786 | 1628866 | splicing factor, arginine/serine-rich 7  | Sfrs7  | 362687 | 1,03 | up   |
| 5635307 | 7302786 | 1628864 | splicing factor, arginine/serine-rich 7  | Sfrs7  | 362687 | 1,31 | up   |
| 5798553 | 7302786 | 1628863 | splicing factor, arginine/serine-rich 7  | Sfrs7  | 362687 | 1,24 | up   |
| 5880876 | 7302786 | 1628868 | splicing factor, arginine/serine-rich 7  | Sfrs7  | 362687 | 1,01 | up   |
| 6038165 | 7302786 | 1628870 | splicing factor, arginine/serine-rich 7  | Sfrs7  | 362687 | 1,08 | up   |
| 6078671 | 7302786 | 1628865 | splicing factor, arginine/serine-rich 7  | Sfrs7  | 362687 | 1,11 | up   |
| 6101752 | 7302786 | 1628870 | splicing factor, arginine/serine-rich 7  | Sfrs7  | 362687 | 1,12 | down |
| 6322007 | 7302786 | 1628864 | splicing factor, arginine/serine-rich 7  | Sfrs7  | 362687 | 1,73 | up   |
| 6384604 | 7302786 | 1628867 | splicing factor, arginine/serine-rich 7  | Sfrs7  | 362687 | 1,01 | down |
| 6713828 | 7302786 | 1628863 | splicing factor, arginine/serine-rich 7  | Sfrs7  | 362687 | 1,09 | up   |
| 5715000 | 7101643 | 1131565 | splicing factor, arginine/serine-rich 8  | Sfrs8  | 304431 | 1,59 | down |
| 5753706 | 7101643 | 1131573 | splicing factor, arginine/serine-rich 8  | Sfrs8  | 304431 | 1,17 | down |
| 5800673 | 7101643 | 1131592 | splicing factor, arginine/serine-rich 8  | Sfrs8  | 304431 | 1,14 | up   |
| 5928937 | 7101643 | 1131593 | splicing factor, arginine/serine-rich 8  | Sfrs8  | 304431 | 1,00 | down |
| 5949465 | 7101643 | 1131594 | splicing factor, arginine/serine-rich 8  | Sfrs8  | 304431 | 1,18 | up   |
| 5989241 | 7101643 | 1131595 | splicing factor, arginine/serine-rich 8  | Sfrs8  | 304431 | 1,15 | down |
| 6030707 | 7101643 | 1131578 | splicing factor, arginine/serine-rich 8  | Sfrs8  | 304431 | 1,01 | down |
| 6091038 | 7101643 | 1131565 | splicing factor, arginine/serine-rich 8  | Sfrs8  | 304431 | 1,59 | up   |
| 6108322 | 7101643 | 1131567 | splicing factor, arginine/serine-rich 8  | Sfrs8  | 304431 | 1,06 | down |
| 6162664 | 7101643 | 1131576 | splicing factor, arginine/serine-rich 8  | Sfrs8  | 304431 | 1,32 | down |
| 6201166 | 7101643 | 1131577 | splicing factor, arginine/serine-rich 8  | Sfrs8  | 304431 | 1,06 | down |
| 6214326 | 7101643 | 1131565 | splicing factor, arginine/serine-rich 8  | Sfrs8  | 304431 | 1,36 | down |
| 6217291 | 7101643 | 1131583 | splicing factor, arginine/serine-rich 8  | Sfrs8  | 304431 | 1,50 | up   |
| 6233567 | 7101643 | 1131590 | splicing factor, arginine/serine-rich 8  | Sfrs8  | 304431 | 1,03 | down |
| 6268344 | 7101643 | 1131582 | splicing factor, arginine/serine-rich 8  | Sfrs8  | 304431 | 1,46 | up   |

|         |         |         |                                                             |       |        |      |      |
|---------|---------|---------|-------------------------------------------------------------|-------|--------|------|------|
| 6268454 | 7101643 | 1131591 | splicing factor, arginine/serine-rich 8                     | Sfrs8 | 304431 | 1,19 | up   |
| 6297254 | 7101643 | 1131595 | splicing factor, arginine/serine-rich 8                     | Sfrs8 | 304431 | 1,64 | up   |
| 6324286 | 7101643 | 1131576 | splicing factor, arginine/serine-rich 8                     | Sfrs8 | 304431 | 1,02 | up   |
| 6341828 | 7101643 | 1131565 | splicing factor, arginine/serine-rich 8                     | Sfrs8 | 304431 | 1,22 | up   |
| 6418056 | 7101643 | 1131581 | splicing factor, arginine/serine-rich 8                     | Sfrs8 | 304431 | 1,24 | down |
| 6481350 | 7101643 | 1131595 | splicing factor, arginine/serine-rich 8                     | Sfrs8 | 304431 | 1,32 | down |
| 6553704 | 7101643 | 1131566 | splicing factor, arginine/serine-rich 8                     | Sfrs8 | 304431 | 1,07 | down |
| 6563623 | 7101643 | 1131580 | splicing factor, arginine/serine-rich 8                     | Sfrs8 | 304431 | 1,74 | up   |
| 6631176 | 7101643 | 1131576 | splicing factor, arginine/serine-rich 8                     | Sfrs8 | 304431 | 1,15 | down |
| 6632648 | 7101643 | 1131595 | splicing factor, arginine/serine-rich 8                     | Sfrs8 | 304431 | 1,05 | down |
| 6734665 | 7101643 | 1131565 | splicing factor, arginine/serine-rich 8                     | Sfrs8 | 304431 | 1,14 | up   |
| 5636569 | 7193228 | 1358741 | sprouty homolog 1, antagonist of FGF signaling (Drosophila) | Spry1 | 294981 | 1,31 | down |
| 5856757 | 7193228 | 1358741 | sprouty homolog 1, antagonist of FGF signaling (Drosophila) | Spry1 | 294981 | 1,35 | up   |
| 5869379 | 7193228 | 1358742 | sprouty homolog 1, antagonist of FGF signaling (Drosophila) | Spry1 | 294981 | 1,39 | up   |
| 5974054 | 7193228 | 1358741 | sprouty homolog 1, antagonist of FGF signaling (Drosophila) | Spry1 | 294981 | 2,04 | up   |
| 5980090 | 7193228 | 1358741 | sprouty homolog 1, antagonist of FGF signaling (Drosophila) | Spry1 | 294981 | 1,20 | down |
| 6160371 | 7193228 | 1358742 | sprouty homolog 1, antagonist of FGF signaling (Drosophila) | Spry1 | 294981 | 1,04 | up   |
| 5896721 | 7370475 | 1797127 | src homology 2 domain-containing transforming protein D     | Shd   | 316507 | 1,30 | up   |
| 5910737 | 7370475 | 1797131 | src homology 2 domain-containing transforming protein D     | Shd   | 316507 | 1,32 | down |
| 6052662 | 7370475 | 1797130 | src homology 2 domain-containing transforming protein D     | Shd   | 316507 | 2,46 | up   |
| 6070411 | 7370475 | 1797135 | src homology 2 domain-containing transforming protein D     | Shd   | 316507 | 1,14 | down |
| 6188991 | 7370475 | 1797127 | src homology 2 domain-containing transforming protein D     | Shd   | 316507 | 1,31 | up   |
| 6330207 | 7370475 | 1797135 | src homology 2 domain-containing transforming protein D     | Shd   | 316507 | 1,60 | up   |
| 6367095 | 7370475 | 1797128 | src homology 2 domain-containing transforming protein D     | Shd   | 316507 | 1,13 | down |
| 6472507 | 7370475 | 1797132 | src homology 2 domain-containing transforming protein D     | Shd   | 316507 | 1,01 | up   |
| 6710950 | 7370475 | 1797136 | src homology 2 domain-containing transforming protein D     | Shd   | 316507 | 1,38 | down |
| 5682666 | 7111181 | 1155226 | SRY (sex determining region Y)-box 13                       | Sox13 | 289026 | 2,45 | down |
| 5766777 | 7111181 | 1155235 | SRY (sex determining region Y)-box 13                       | Sox13 | 289026 | 1,14 | down |
| 5778323 | 7111181 | 1155224 | SRY (sex determining region Y)-box 13                       | Sox13 | 289026 | 1,04 | down |
| 5800244 | 7111181 | 1155225 | SRY (sex determining region Y)-box 13                       | Sox13 | 289026 | 1,53 | up   |
| 5805693 | 7111181 | 1155231 | SRY (sex determining region Y)-box 13                       | Sox13 | 289026 | 1,24 | down |
| 5858408 | 7111181 | 1155233 | SRY (sex determining region Y)-box 13                       | Sox13 | 289026 | 1,29 | up   |
| 5906197 | 7111181 | 1155223 | SRY (sex determining region Y)-box 13                       | Sox13 | 289026 | 1,56 | down |
| 5949534 | 7111181 | 1155232 | SRY (sex determining region Y)-box 13                       | Sox13 | 289026 | 1,36 | down |
| 6059847 | 7111181 | 1155234 | SRY (sex determining region Y)-box 13                       | Sox13 | 289026 | 1,05 | up   |
| 6081461 | 7111181 | 1155229 | SRY (sex determining region Y)-box 13                       | Sox13 | 289026 | 1,44 | up   |
| 6249911 | 7111181 | 1155230 | SRY (sex determining region Y)-box 13                       | Sox13 | 289026 | 1,41 | up   |
| 6306930 | 7111181 | 1155238 | SRY (sex determining region Y)-box 13                       | Sox13 | 289026 | 1,59 | down |
| 6456226 | 7111181 | 1155227 | SRY (sex determining region Y)-box 13                       | Sox13 | 289026 | 2,78 | down |
| 6567929 | 7111181 | 1155228 | SRY (sex determining region Y)-box 13                       | Sox13 | 289026 | 1,19 | up   |
| 6746092 | 7111181 | 1155223 | SRY (sex determining region Y)-box 13                       | Sox13 | 289026 | 1,11 | down |
| 5720030 | 7056304 | 1023558 | SRY (sex determining region Y)-box 6                        | Sox6  | 293165 | 1,14 | down |
| 5743927 | 7056304 | 1023558 | SRY (sex determining region Y)-box 6                        | Sox6  | 293165 | 1,42 | down |
| 5878426 | 7056304 | 1023571 | SRY (sex determining region Y)-box 6                        | Sox6  | 293165 | 1,11 | down |
| 5908378 | 7056304 | 1023548 | SRY (sex determining region Y)-box 6                        | Sox6  | 293165 | 1,07 | down |
| 6073164 | 7056304 | 1023616 | SRY (sex determining region Y)-box 6                        | Sox6  | 293165 | 1,84 | up   |
| 6078208 | 7056304 | 1023561 | SRY (sex determining region Y)-box 6                        | Sox6  | 293165 | 1,15 | up   |
| 6099122 | 7056304 | 1023582 | SRY (sex determining region Y)-box 6                        | Sox6  | 293165 | 1,39 | down |
| 6205229 | 7056304 | 1023597 | SRY (sex determining region Y)-box 6                        | Sox6  | 293165 | 1,12 | up   |
| 6254759 | 7056304 | 1023537 | SRY (sex determining region Y)-box 6                        | Sox6  | 293165 | 1,04 | up   |
| 6373754 | 7056304 | 1023549 | SRY (sex determining region Y)-box 6                        | Sox6  | 293165 | 1,08 | down |
| 6426639 | 7056304 | 1023524 | SRY (sex determining region Y)-box 6                        | Sox6  | 293165 | 1,03 | down |
| 6532329 | 7056304 | 1023521 | SRY (sex determining region Y)-box 6                        | Sox6  | 293165 | 1,08 | up   |
| 6586818 | 7056304 | 1023593 | SRY (sex determining region Y)-box 6                        | Sox6  | 293165 | 1,02 | down |
| 6650452 | 7056304 | 1023550 | SRY (sex determining region Y)-box 6                        | Sox6  | 293165 | 1,24 | down |
| 6651788 | 7056304 | 1023597 | SRY (sex determining region Y)-box 6                        | Sox6  | 293165 | 1,05 | up   |

|         |         |         |                                                         |         |        |      |      |
|---------|---------|---------|---------------------------------------------------------|---------|--------|------|------|
| 6690141 | 7056304 | 1023569 | SRY (sex determining region Y)-box 6                    | Sox6    | 293165 | 2,64 | up   |
| 6702226 | 7056304 | 1023548 | SRY (sex determining region Y)-box 6                    | Sox6    | 293165 | 1,05 | down |
| 6745516 | 7056304 | 1023582 | SRY (sex determining region Y)-box 6                    | Sox6    | 293165 | 1,00 | down |
| 5671983 | 7075533 | 1069572 | SRY (sex determining region Y)-box 8                    | Sox8    | 302993 | 1,04 | up   |
| 5759305 | 7075533 | 1069569 | SRY (sex determining region Y)-box 8                    | Sox8    | 302993 | 1,56 | down |
| 5934266 | 7075533 | 1069569 | SRY (sex determining region Y)-box 8                    | Sox8    | 302993 | 1,12 | up   |
| 6030264 | 7075533 | 1069573 | SRY (sex determining region Y)-box 8                    | Sox8    | 302993 | 1,84 | down |
| 6185810 | 7075533 | 1069573 | SRY (sex determining region Y)-box 8                    | Sox8    | 302993 | 2,64 | down |
| 6418959 | 7075533 | 1069573 | SRY (sex determining region Y)-box 8                    | Sox8    | 302993 | 1,07 | up   |
| 6486512 | 7075533 | 1069573 | SRY (sex determining region Y)-box 8                    | Sox8    | 302993 | 1,02 | up   |
| 5749329 | 7181026 | 1327844 | ST3 beta-galactoside alpha-2,3-sialyltransferase 2      | St3gal2 | 64442  | 1,09 | up   |
| 5969245 | 7181026 | 1327843 | ST3 beta-galactoside alpha-2,3-sialyltransferase 2      | St3gal2 | 64442  | 1,79 | up   |
| 6194760 | 7181026 | 1327839 | ST3 beta-galactoside alpha-2,3-sialyltransferase 2      | St3gal2 | 64442  | 1,06 | down |
| 6367959 | 7181026 | 1327841 | ST3 beta-galactoside alpha-2,3-sialyltransferase 2      | St3gal2 | 64442  | 1,17 | up   |
| 6415802 | 7181026 | 1327838 | ST3 beta-galactoside alpha-2,3-sialyltransferase 2      | St3gal2 | 64442  | 1,01 | up   |
| 6440579 | 7181026 | 1327844 | ST3 beta-galactoside alpha-2,3-sialyltransferase 2      | St3gal2 | 64442  | 1,08 | down |
| 6496896 | 7181026 | 1327842 | ST3 beta-galactoside alpha-2,3-sialyltransferase 2      | St3gal2 | 64442  | 2,26 | down |
| 5683892 | 7343909 | 1729988 | ST3 beta-galactoside alpha-2,3-sialyltransferase 4      | St3gal4 | 363040 | 1,18 | down |
| 5690144 | 7343909 | 1729987 | ST3 beta-galactoside alpha-2,3-sialyltransferase 4      | St3gal4 | 363040 | 1,54 | down |
| 5723131 | 7343909 | 1729980 | ST3 beta-galactoside alpha-2,3-sialyltransferase 4      | St3gal4 | 363040 | 2,12 | down |
| 5744270 | 7343909 | 1729982 | ST3 beta-galactoside alpha-2,3-sialyltransferase 4      | St3gal4 | 363040 | 1,69 | down |
| 6144275 | 7343909 | 1729984 | ST3 beta-galactoside alpha-2,3-sialyltransferase 4      | St3gal4 | 363040 | 1,05 | up   |
| 6201903 | 7343909 | 1729981 | ST3 beta-galactoside alpha-2,3-sialyltransferase 4      | St3gal4 | 363040 | 1,05 | up   |
| 6466445 | 7343909 | 1729986 | ST3 beta-galactoside alpha-2,3-sialyltransferase 4      | St3gal4 | 363040 | 1,05 | down |
| 6471370 | 7343909 | 1729978 | ST3 beta-galactoside alpha-2,3-sialyltransferase 4      | St3gal4 | 363040 | 1,97 | up   |
| 6510788 | 7343909 | 1729983 | ST3 beta-galactoside alpha-2,3-sialyltransferase 4      | St3gal4 | 363040 | 1,07 | up   |
| 6649774 | 7343909 | 1729979 | ST3 beta-galactoside alpha-2,3-sialyltransferase 4      | St3gal4 | 363040 | 1,12 | down |
| 6685195 | 7343909 | 1729989 | ST3 beta-galactoside alpha-2,3-sialyltransferase 4      | St3gal4 | 363040 | 1,23 | up   |
| 6734905 | 7343909 | 1729985 | ST3 beta-galactoside alpha-2,3-sialyltransferase 4      | St3gal4 | 363040 | 1,28 | down |
| 5659442 | 7094780 | 1114561 | ST6 beta-galactosamide alpha-2,6-sialyltransferase 1    | St6gal1 | 25197  | 1,17 | down |
| 5791672 | 7094780 | 1114557 | ST6 beta-galactosamide alpha-2,6-sialyltransferase 1    | St6gal1 | 25197  | 1,27 | down |
| 5799259 | 7094780 | 1114560 | ST6 beta-galactosamide alpha-2,6-sialyltransferase 1    | St6gal1 | 25197  | 1,11 | up   |
| 5838256 | 7094780 | 1114555 | ST6 beta-galactosamide alpha-2,6-sialyltransferase 1    | St6gal1 | 25197  | 1,27 | down |
| 5948106 | 7094780 | 1114552 | ST6 beta-galactosamide alpha-2,6-sialyltransferase 1    | St6gal1 | 25197  | 1,02 | down |
| 6175499 | 7094780 | 1114551 | ST6 beta-galactosamide alpha-2,6-sialyltransferase 1    | St6gal1 | 25197  | 1,02 | down |
| 6188168 | 7094780 | 1114553 | ST6 beta-galactosamide alpha-2,6-sialyltransferase 1    | St6gal1 | 25197  | 1,36 | down |
| 6234293 | 7094780 | 1114561 | ST6 beta-galactosamide alpha-2,6-sialyltransferase 1    | St6gal1 | 25197  | 1,08 | up   |
| 6296460 | 7094780 | 1114550 | ST6 beta-galactosamide alpha-2,6-sialyltransferase 1    | St6gal1 | 25197  | 1,47 | down |
| 6329008 | 7094780 | 1114561 | ST6 beta-galactosamide alpha-2,6-sialyltransferase 1    | St6gal1 | 25197  | 1,50 | up   |
| 6403013 | 7094780 | 1114561 | ST6 beta-galactosamide alpha-2,6-sialyltransferase 1    | St6gal1 | 25197  | 1,03 | down |
| 6564296 | 7094780 | 1114559 | ST6 beta-galactosamide alpha-2,6-sialyltransferase 1    | St6gal1 | 25197  | 2,03 | up   |
| 6569995 | 7094780 | 1114549 | ST6 beta-galactosamide alpha-2,6-sialyltransferase 1    | St6gal1 | 25197  | 1,02 | up   |
| 6589376 | 7094780 | 1114554 | ST6 beta-galactosamide alpha-2,6-sialyltransferase 1    | St6gal1 | 25197  | 1,06 | down |
| 6590671 | 7094780 | 1114556 | ST6 beta-galactosamide alpha-2,6-sialyltransferase 1    | St6gal1 | 25197  | 1,28 | up   |
| 6627447 | 7094780 | 1114558 | ST6 beta-galactosamide alpha-2,6-sialyltransferase 1    | St6gal1 | 25197  | 2,24 | up   |
| 6653624 | 7094780 | 1114548 | ST6 beta-galactosamide alpha-2,6-sialyltransferase 1    | St6gal1 | 25197  | 1,41 | up   |
| 6699870 | 7094780 | 1114562 | ST6 beta-galactosamide alpha-2,6-sialyltransferase 1    | St6gal1 | 25197  | 2,20 | up   |
| 5998868 | 7033672 | 970368  | StAR-related lipid transfer (START) domain containing 5 | Stard5  | 502348 | 1,07 | down |
| 5707927 | 7248977 | 1494983 | stathmin-like 3                                         | Stmn3   | 29246  | 1,02 | down |
| 6056109 | 7248977 | 1494983 | stathmin-like 3                                         | Stmn3   | 29246  | 1,80 | down |
| 6225056 | 7248977 | 1494987 | stathmin-like 3                                         | Stmn3   | 29246  | 1,02 | down |
| 6519181 | 7248977 | 1494986 | stathmin-like 3                                         | Stmn3   | 29246  | 1,61 | down |
| 6604229 | 7248977 | 1494985 | stathmin-like 3                                         | Stmn3   | 29246  | 1,28 | up   |
| 6645060 | 7248977 | 1494984 | stathmin-like 3                                         | Stmn3   | 29246  | 2,86 | up   |
| 5706982 | 7042758 | 992152  | STE20-like kinase (yeast)                               | Slk     | 54308  | 1,06 | down |
| 5745952 | 7042758 | 992152  | STE20-like kinase (yeast)                               | Slk     | 54308  | 1,14 | down |

|         |         |         |                                              |        |        |      |      |
|---------|---------|---------|----------------------------------------------|--------|--------|------|------|
| 5780559 | 7042758 | 992155  | STE20-like kinase (yeast)                    | Slk    | 54308  | 1,22 | down |
| 5928352 | 7042758 | 992148  | STE20-like kinase (yeast)                    | Slk    | 54308  | 1,16 | up   |
| 5931770 | 7042758 | 992154  | STE20-like kinase (yeast)                    | Slk    | 54308  | 1,19 | up   |
| 5981047 | 7042758 | 992160  | STE20-like kinase (yeast)                    | Slk    | 54308  | 1,01 | down |
| 6018837 | 7042758 | 992149  | STE20-like kinase (yeast)                    | Slk    | 54308  | 1,39 | up   |
| 6037195 | 7042758 | 992144  | STE20-like kinase (yeast)                    | Slk    | 54308  | 1,11 | down |
| 6097922 | 7042758 | 992156  | STE20-like kinase (yeast)                    | Slk    | 54308  | 2,26 | down |
| 6098830 | 7042758 | 992145  | STE20-like kinase (yeast)                    | Slk    | 54308  | 1,05 | down |
| 6116547 | 7042758 | 992147  | STE20-like kinase (yeast)                    | Slk    | 54308  | 1,16 | down |
| 6169880 | 7042758 | 992150  | STE20-like kinase (yeast)                    | Slk    | 54308  | 1,15 | up   |
| 6212463 | 7042758 | 992157  | STE20-like kinase (yeast)                    | Slk    | 54308  | 1,02 | down |
| 6316178 | 7042758 | 992153  | STE20-like kinase (yeast)                    | Slk    | 54308  | 1,36 | up   |
| 6343762 | 7042758 | 992158  | STE20-like kinase (yeast)                    | Slk    | 54308  | 1,06 | up   |
| 6397558 | 7042758 | 992144  | STE20-like kinase (yeast)                    | Slk    | 54308  | 1,14 | down |
| 6420622 | 7042758 | 992159  | STE20-like kinase (yeast)                    | Slk    | 54308  | 1,03 | up   |
| 6426625 | 7042758 | 992146  | STE20-like kinase (yeast)                    | Slk    | 54308  | 1,06 | down |
| 6510569 | 7042758 | 992152  | STE20-like kinase (yeast)                    | Slk    | 54308  | 1,05 | down |
| 6658960 | 7042758 | 992152  | STE20-like kinase (yeast)                    | Slk    | 54308  | 1,14 | up   |
| 6671549 | 7042758 | 992151  | STE20-like kinase (yeast)                    | Slk    | 54308  | 1,09 | up   |
| 5703576 | 7044052 | 995684  | sterile alpha motif domain containing 5      | Samd5  | 365038 | 1,15 | up   |
| 5706252 | 7044052 | 995675  | sterile alpha motif domain containing 5      | Samd5  | 365038 | 1,00 | up   |
| 5886805 | 7044052 | 995684  | sterile alpha motif domain containing 5      | Samd5  | 365038 | 2,19 | up   |
| 6296443 | 7044052 | 995684  | sterile alpha motif domain containing 5      | Samd5  | 365038 | 1,32 | down |
| 5677783 | 7261766 | 1527156 | sterile alpha motif domain containing 9-like | Samd9l | 500015 | 1,40 | down |
| 6101494 | 7261766 | 1527157 | sterile alpha motif domain containing 9-like | Samd9l | 500015 | 4,33 | up   |
| 5702538 | 7321006 | 1674750 | sterol O-acyltransferase 2                   | Soat2  | 266770 | 1,20 | down |
| 5834779 | 7321006 | 1674765 | sterol O-acyltransferase 2                   | Soat2  | 266770 | 1,40 | down |
| 5837624 | 7321006 | 1674755 | sterol O-acyltransferase 2                   | Soat2  | 266770 | 1,12 | up   |
| 5890290 | 7321006 | 1674763 | sterol O-acyltransferase 2                   | Soat2  | 266770 | 1,30 | down |
| 5987208 | 7321006 | 1674759 | sterol O-acyltransferase 2                   | Soat2  | 266770 | 1,27 | down |
| 5993086 | 7321006 | 1674752 | sterol O-acyltransferase 2                   | Soat2  | 266770 | 1,40 | down |
| 5997392 | 7321006 | 1674750 | sterol O-acyltransferase 2                   | Soat2  | 266770 | 1,01 | down |
| 6130634 | 7321006 | 1674757 | sterol O-acyltransferase 2                   | Soat2  | 266770 | 1,08 | down |
| 6185058 | 7321006 | 1674760 | sterol O-acyltransferase 2                   | Soat2  | 266770 | 1,11 | up   |
| 6202725 | 7321006 | 1674764 | sterol O-acyltransferase 2                   | Soat2  | 266770 | 1,67 | up   |
| 6238370 | 7321006 | 1674762 | sterol O-acyltransferase 2                   | Soat2  | 266770 | 1,16 | up   |
| 6355925 | 7321006 | 1674756 | sterol O-acyltransferase 2                   | Soat2  | 266770 | 1,02 | up   |
| 6369851 | 7321006 | 1674753 | sterol O-acyltransferase 2                   | Soat2  | 266770 | 1,37 | down |
| 6514296 | 7321006 | 1674763 | sterol O-acyltransferase 2                   | Soat2  | 266770 | 1,04 | up   |
| 6561394 | 7321006 | 1674758 | sterol O-acyltransferase 2                   | Soat2  | 266770 | 1,23 | down |
| 6659965 | 7321006 | 1674761 | sterol O-acyltransferase 2                   | Soat2  | 266770 | 1,31 | down |
| 6713119 | 7321006 | 1674751 | sterol O-acyltransferase 2                   | Soat2  | 266770 | 1,13 | up   |
| 6732527 | 7321006 | 1674754 | sterol O-acyltransferase 2                   | Soat2  | 266770 | 2,45 | up   |
| 6745282 | 7321006 | 1674764 | sterol O-acyltransferase 2                   | Soat2  | 266770 | 1,21 | down |
| 5693441 | 7312566 | 1653332 | strawberry notch homolog 2 (Drosophila)      | Sbno2  | 314619 | 1,24 | down |
| 5695646 | 7312566 | 1653319 | strawberry notch homolog 2 (Drosophila)      | Sbno2  | 314619 | 1,31 | up   |
| 5712363 | 7312566 | 1653300 | strawberry notch homolog 2 (Drosophila)      | Sbno2  | 314619 | 1,11 | up   |
| 5773414 | 7312566 | 1653328 | strawberry notch homolog 2 (Drosophila)      | Sbno2  | 314619 | 1,31 | up   |
| 5798335 | 7312566 | 1653295 | strawberry notch homolog 2 (Drosophila)      | Sbno2  | 314619 | 1,33 | down |
| 5866709 | 7312566 | 1653332 | strawberry notch homolog 2 (Drosophila)      | Sbno2  | 314619 | 1,62 | up   |
| 5871476 | 7312566 | 1653325 | strawberry notch homolog 2 (Drosophila)      | Sbno2  | 314619 | 1,10 | up   |
| 5881876 | 7312566 | 1653311 | strawberry notch homolog 2 (Drosophila)      | Sbno2  | 314619 | 1,26 | up   |
| 5891041 | 7312566 | 1653310 | strawberry notch homolog 2 (Drosophila)      | Sbno2  | 314619 | 2,14 | up   |
| 5895319 | 7312566 | 1653298 | strawberry notch homolog 2 (Drosophila)      | Sbno2  | 314619 | 1,00 | down |
| 5947135 | 7312566 | 1653329 | strawberry notch homolog 2 (Drosophila)      | Sbno2  | 314619 | 1,50 | up   |
| 5947347 | 7312566 | 1653317 | strawberry notch homolog 2 (Drosophila)      | Sbno2  | 314619 | 1,44 | up   |

|         |         |         |                                         |       |        |      |      |
|---------|---------|---------|-----------------------------------------|-------|--------|------|------|
| 5957517 | 7312566 | 1653309 | strawberry notch homolog 2 (Drosophila) | Sbno2 | 314619 | 1,50 | up   |
| 6003700 | 7312566 | 1653321 | strawberry notch homolog 2 (Drosophila) | Sbno2 | 314619 | 1,72 | up   |
| 6008339 | 7312566 | 1653327 | strawberry notch homolog 2 (Drosophila) | Sbno2 | 314619 | 1,11 | up   |
| 6104689 | 7312566 | 1653297 | strawberry notch homolog 2 (Drosophila) | Sbno2 | 314619 | 1,38 | down |
| 6113838 | 7312566 | 1653296 | strawberry notch homolog 2 (Drosophila) | Sbno2 | 314619 | 1,75 | down |
| 6114062 | 7312566 | 1653295 | strawberry notch homolog 2 (Drosophila) | Sbno2 | 314619 | 2,28 | down |
| 6171320 | 7312566 | 1653330 | strawberry notch homolog 2 (Drosophila) | Sbno2 | 314619 | 1,19 | down |
| 6198418 | 7312566 | 1653322 | strawberry notch homolog 2 (Drosophila) | Sbno2 | 314619 | 1,86 | up   |
| 6235446 | 7312566 | 1653313 | strawberry notch homolog 2 (Drosophila) | Sbno2 | 314619 | 1,03 | up   |
| 6306049 | 7312566 | 1653318 | strawberry notch homolog 2 (Drosophila) | Sbno2 | 314619 | 1,52 | up   |
| 6350894 | 7312566 | 1653335 | strawberry notch homolog 2 (Drosophila) | Sbno2 | 314619 | 1,20 | down |
| 6373626 | 7312566 | 1653335 | strawberry notch homolog 2 (Drosophila) | Sbno2 | 314619 | 1,02 | down |
| 6377254 | 7312566 | 1653304 | strawberry notch homolog 2 (Drosophila) | Sbno2 | 314619 | 1,60 | up   |
| 6447320 | 7312566 | 1653324 | strawberry notch homolog 2 (Drosophila) | Sbno2 | 314619 | 1,23 | down |
| 6467346 | 7312566 | 1653331 | strawberry notch homolog 2 (Drosophila) | Sbno2 | 314619 | 1,43 | up   |
| 6476910 | 7312566 | 1653323 | strawberry notch homolog 2 (Drosophila) | Sbno2 | 314619 | 1,14 | down |
| 6477252 | 7312566 | 1653333 | strawberry notch homolog 2 (Drosophila) | Sbno2 | 314619 | 1,16 | down |
| 6502130 | 7312566 | 1653321 | strawberry notch homolog 2 (Drosophila) | Sbno2 | 314619 | 1,01 | down |
| 6511673 | 7312566 | 1653316 | strawberry notch homolog 2 (Drosophila) | Sbno2 | 314619 | 1,38 | down |
| 6564903 | 7312566 | 1653334 | strawberry notch homolog 2 (Drosophila) | Sbno2 | 314619 | 1,35 | up   |
| 6593711 | 7312566 | 1653335 | strawberry notch homolog 2 (Drosophila) | Sbno2 | 314619 | 1,21 | up   |
| 6597519 | 7312566 | 1653315 | strawberry notch homolog 2 (Drosophila) | Sbno2 | 314619 | 1,20 | down |
| 6661065 | 7312566 | 1653326 | strawberry notch homolog 2 (Drosophila) | Sbno2 | 314619 | 1,10 | up   |
| 6676089 | 7312566 | 1653312 | strawberry notch homolog 2 (Drosophila) | Sbno2 | 314619 | 1,31 | up   |
| 6704590 | 7312566 | 1653314 | strawberry notch homolog 2 (Drosophila) | Sbno2 | 314619 | 1,36 | up   |
| 6735602 | 7312566 | 1653313 | strawberry notch homolog 2 (Drosophila) | Sbno2 | 314619 | 1,03 | down |
| 5645466 | 7339732 | 1719248 | stromal antigen 1                       | Stag1 | 315958 | 1,02 | down |
| 5673175 | 7339732 | 1719192 | stromal antigen 1                       | Stag1 | 315958 | 1,41 | down |
| 5736358 | 7339732 | 1719220 | stromal antigen 1                       | Stag1 | 315958 | 1,01 | down |
| 5748455 | 7339732 | 1719226 | stromal antigen 1                       | Stag1 | 315958 | 1,57 | up   |
| 5862849 | 7339732 | 1719245 | stromal antigen 1                       | Stag1 | 315958 | 1,23 | down |
| 5868456 | 7339732 | 1719204 | stromal antigen 1                       | Stag1 | 315958 | 1,29 | up   |
| 5923209 | 7339732 | 1719208 | stromal antigen 1                       | Stag1 | 315958 | 1,17 | down |
| 5923575 | 7339732 | 1719199 | stromal antigen 1                       | Stag1 | 315958 | 1,52 | up   |
| 5975181 | 7339732 | 1719232 | stromal antigen 1                       | Stag1 | 315958 | 1,23 | up   |
| 5982508 | 7339732 | 1719215 | stromal antigen 1                       | Stag1 | 315958 | 1,16 | up   |
| 6185667 | 7339732 | 1719212 | stromal antigen 1                       | Stag1 | 315958 | 1,09 | up   |
| 6194048 | 7339732 | 1719211 | stromal antigen 1                       | Stag1 | 315958 | 1,04 | up   |
| 6197641 | 7339732 | 1719228 | stromal antigen 1                       | Stag1 | 315958 | 1,83 | up   |
| 6252620 | 7339732 | 1719230 | stromal antigen 1                       | Stag1 | 315958 | 1,02 | up   |
| 6281339 | 7339732 | 1719197 | stromal antigen 1                       | Stag1 | 315958 | 1,29 | down |
| 6320234 | 7339732 | 1719246 | stromal antigen 1                       | Stag1 | 315958 | 1,03 | up   |
| 6348207 | 7339732 | 1719244 | stromal antigen 1                       | Stag1 | 315958 | 1,55 | down |
| 6363130 | 7339732 | 1719241 | stromal antigen 1                       | Stag1 | 315958 | 1,07 | down |
| 6368785 | 7339732 | 1719219 | stromal antigen 1                       | Stag1 | 315958 | 1,78 | up   |
| 6380768 | 7339732 | 1719208 | stromal antigen 1                       | Stag1 | 315958 | 1,11 | down |
| 6381556 | 7339732 | 1719217 | stromal antigen 1                       | Stag1 | 315958 | 1,60 | up   |
| 6408493 | 7339732 | 1719247 | stromal antigen 1                       | Stag1 | 315958 | 1,19 | up   |
| 6471185 | 7339732 | 1719249 | stromal antigen 1                       | Stag1 | 315958 | 1,22 | up   |
| 6473945 | 7339732 | 1719201 | stromal antigen 1                       | Stag1 | 315958 | 1,23 | down |
| 6521467 | 7339732 | 1719231 | stromal antigen 1                       | Stag1 | 315958 | 2,11 | down |
| 6535676 | 7339732 | 1719236 | stromal antigen 1                       | Stag1 | 315958 | 1,05 | down |
| 6579686 | 7339732 | 1719242 | stromal antigen 1                       | Stag1 | 315958 | 1,21 | down |
| 6594844 | 7339732 | 1719206 | stromal antigen 1                       | Stag1 | 315958 | 1,06 | up   |
| 6597754 | 7339732 | 1719192 | stromal antigen 1                       | Stag1 | 315958 | 1,26 | up   |
| 6598958 | 7339732 | 1719229 | stromal antigen 1                       | Stag1 | 315958 | 1,24 | down |

|         |         |         |                                         |       |        |      |      |
|---------|---------|---------|-----------------------------------------|-------|--------|------|------|
| 6608575 | 7339732 | 1719243 | stromal antigen 1                       | Stag1 | 315958 | 1,46 | down |
| 6654734 | 7339732 | 1719227 | stromal antigen 1                       | Stag1 | 315958 | 1,77 | up   |
| 6694845 | 7339732 | 1719216 | stromal antigen 1                       | Stag1 | 315958 | 1,07 | down |
| 6731567 | 7339732 | 1719236 | stromal antigen 1                       | Stag1 | 315958 | 1,71 | up   |
| 5668302 | 7097164 | 1120094 | stromal antigen 3                       | Stag3 | 114522 | 1,11 | up   |
| 5677947 | 7097164 | 1120113 | stromal antigen 3                       | Stag3 | 114522 | 1,01 | down |
| 5697787 | 7097164 | 1120090 | stromal antigen 3                       | Stag3 | 114522 | 1,12 | up   |
| 5725889 | 7097164 | 1120098 | stromal antigen 3                       | Stag3 | 114522 | 1,10 | up   |
| 5749695 | 7097164 | 1120086 | stromal antigen 3                       | Stag3 | 114522 | 1,15 | down |
| 5788101 | 7097164 | 1120118 | stromal antigen 3                       | Stag3 | 114522 | 1,09 | down |
| 5796557 | 7097164 | 1120092 | stromal antigen 3                       | Stag3 | 114522 | 1,23 | down |
| 5813571 | 7097164 | 1120100 | stromal antigen 3                       | Stag3 | 114522 | 1,64 | down |
| 5819273 | 7097164 | 1120107 | stromal antigen 3                       | Stag3 | 114522 | 1,00 | down |
| 5836955 | 7097164 | 1120083 | stromal antigen 3                       | Stag3 | 114522 | 1,16 | down |
| 5854632 | 7097164 | 1120091 | stromal antigen 3                       | Stag3 | 114522 | 1,04 | up   |
| 5855948 | 7097164 | 1120097 | stromal antigen 3                       | Stag3 | 114522 | 1,34 | down |
| 5901673 | 7097164 | 1120103 | stromal antigen 3                       | Stag3 | 114522 | 1,13 | up   |
| 5925716 | 7097164 | 1120115 | stromal antigen 3                       | Stag3 | 114522 | 1,07 | down |
| 5939902 | 7097164 | 1120109 | stromal antigen 3                       | Stag3 | 114522 | 1,08 | up   |
| 5959100 | 7097164 | 1120102 | stromal antigen 3                       | Stag3 | 114522 | 1,07 | down |
| 6036025 | 7097164 | 1120088 | stromal antigen 3                       | Stag3 | 114522 | 1,29 | down |
| 6062670 | 7097164 | 1120084 | stromal antigen 3                       | Stag3 | 114522 | 2,01 | down |
| 6142079 | 7097164 | 1120106 | stromal antigen 3                       | Stag3 | 114522 | 1,05 | down |
| 6157423 | 7097164 | 1120105 | stromal antigen 3                       | Stag3 | 114522 | 1,10 | up   |
| 6222950 | 7097164 | 1120085 | stromal antigen 3                       | Stag3 | 114522 | 1,18 | down |
| 6232167 | 7097164 | 1120099 | stromal antigen 3                       | Stag3 | 114522 | 1,06 | down |
| 6254580 | 7097164 | 1120108 | stromal antigen 3                       | Stag3 | 114522 | 1,06 | up   |
| 6296177 | 7097164 | 1120111 | stromal antigen 3                       | Stag3 | 114522 | 1,13 | up   |
| 6306275 | 7097164 | 1120085 | stromal antigen 3                       | Stag3 | 114522 | 1,07 | up   |
| 6332161 | 7097164 | 1120117 | stromal antigen 3                       | Stag3 | 114522 | 1,22 | up   |
| 6360457 | 7097164 | 1120114 | stromal antigen 3                       | Stag3 | 114522 | 1,02 | down |
| 6450023 | 7097164 | 1120095 | stromal antigen 3                       | Stag3 | 114522 | 1,05 | up   |
| 6484229 | 7097164 | 1120093 | stromal antigen 3                       | Stag3 | 114522 | 1,33 | down |
| 6491104 | 7097164 | 1120110 | stromal antigen 3                       | Stag3 | 114522 | 1,00 | up   |
| 6491548 | 7097164 | 1120091 | stromal antigen 3                       | Stag3 | 114522 | 1,06 | up   |
| 6550838 | 7097164 | 1120104 | stromal antigen 3                       | Stag3 | 114522 | 1,43 | down |
| 6564992 | 7097164 | 1120101 | stromal antigen 3                       | Stag3 | 114522 | 1,65 | down |
| 6580437 | 7097164 | 1120112 | stromal antigen 3                       | Stag3 | 114522 | 1,05 | up   |
| 6595575 | 7097164 | 1120105 | stromal antigen 3                       | Stag3 | 114522 | 1,41 | up   |
| 6612338 | 7097164 | 1120116 | stromal antigen 3                       | Stag3 | 114522 | 1,57 | down |
| 6618472 | 7097164 | 1120087 | stromal antigen 3                       | Stag3 | 114522 | 1,34 | down |
| 6654153 | 7097164 | 1120089 | stromal antigen 3                       | Stag3 | 114522 | 2,18 | up   |
| 6654417 | 7097164 | 1120096 | stromal antigen 3                       | Stag3 | 114522 | 1,09 | down |
| 5639056 | 7275103 | 1560190 | structural maintenance of chromosomes 2 | Smc2  | 362519 | 1,06 | down |
| 5670066 | 7275103 | 1560186 | structural maintenance of chromosomes 2 | Smc2  | 362519 | 1,20 | down |
| 5670269 | 7275103 | 1560209 | structural maintenance of chromosomes 2 | Smc2  | 362519 | 1,46 | down |
| 5678102 | 7275103 | 1560210 | structural maintenance of chromosomes 2 | Smc2  | 362519 | 1,69 | down |
| 5742496 | 7275103 | 1560196 | structural maintenance of chromosomes 2 | Smc2  | 362519 | 1,50 | up   |
| 5771841 | 7275103 | 1560211 | structural maintenance of chromosomes 2 | Smc2  | 362519 | 1,09 | up   |
| 5775926 | 7275103 | 1560203 | structural maintenance of chromosomes 2 | Smc2  | 362519 | 1,02 | down |
| 5811010 | 7275103 | 1560193 | structural maintenance of chromosomes 2 | Smc2  | 362519 | 1,44 | down |
| 5837661 | 7275103 | 1560211 | structural maintenance of chromosomes 2 | Smc2  | 362519 | 1,40 | up   |
| 5905116 | 7275103 | 1560191 | structural maintenance of chromosomes 2 | Smc2  | 362519 | 1,58 | up   |
| 5918350 | 7275103 | 1560202 | structural maintenance of chromosomes 2 | Smc2  | 362519 | 1,04 | up   |
| 5949487 | 7275103 | 1560207 | structural maintenance of chromosomes 2 | Smc2  | 362519 | 1,20 | up   |
| 6000366 | 7275103 | 1560199 | structural maintenance of chromosomes 2 | Smc2  | 362519 | 1,53 | up   |

|         |         |         |                                         |       |        |      |      |
|---------|---------|---------|-----------------------------------------|-------|--------|------|------|
| 6111230 | 7275103 | 1560185 | structural maintenance of chromosomes 2 | Smc2  | 362519 | 1,14 | up   |
| 6209820 | 7275103 | 1560189 | structural maintenance of chromosomes 2 | Smc2  | 362519 | 1,39 | down |
| 6211460 | 7275103 | 1560211 | structural maintenance of chromosomes 2 | Smc2  | 362519 | 2,16 | down |
| 6241505 | 7275103 | 1560208 | structural maintenance of chromosomes 2 | Smc2  | 362519 | 1,80 | down |
| 6245220 | 7275103 | 1560194 | structural maintenance of chromosomes 2 | Smc2  | 362519 | 1,26 | up   |
| 6258800 | 7275103 | 1560187 | structural maintenance of chromosomes 2 | Smc2  | 362519 | 1,14 | up   |
| 6300996 | 7275103 | 1560211 | structural maintenance of chromosomes 2 | Smc2  | 362519 | 1,30 | down |
| 6341325 | 7275103 | 1560201 | structural maintenance of chromosomes 2 | Smc2  | 362519 | 1,15 | up   |
| 6369674 | 7275103 | 1560192 | structural maintenance of chromosomes 2 | Smc2  | 362519 | 1,41 | up   |
| 6380739 | 7275103 | 1560197 | structural maintenance of chromosomes 2 | Smc2  | 362519 | 1,22 | down |
| 6555255 | 7275103 | 1560204 | structural maintenance of chromosomes 2 | Smc2  | 362519 | 1,16 | up   |
| 6555778 | 7275103 | 1560188 | structural maintenance of chromosomes 2 | Smc2  | 362519 | 1,15 | up   |
| 6605069 | 7275103 | 1560183 | structural maintenance of chromosomes 2 | Smc2  | 362519 | 1,13 | down |
| 6707647 | 7275103 | 1560198 | structural maintenance of chromosomes 2 | Smc2  | 362519 | 1,97 | up   |
| 6735294 | 7275103 | 1560195 | structural maintenance of chromosomes 2 | Smc2  | 362519 | 1,32 | down |
| 5705830 | 7247976 | 1492459 | sulfatase 2                             | Sulf2 | 311642 | 1,07 | down |
| 5730763 | 7247976 | 1492439 | sulfatase 2                             | Sulf2 | 311642 | 1,08 | down |
| 5765938 | 7247976 | 1492463 | sulfatase 2                             | Sulf2 | 311642 | 1,28 | down |
| 5860183 | 7247976 | 1492444 | sulfatase 2                             | Sulf2 | 311642 | 1,04 | down |
| 6026029 | 7247976 | 1492446 | sulfatase 2                             | Sulf2 | 311642 | 1,15 | up   |
| 6068984 | 7247976 | 1492455 | sulfatase 2                             | Sulf2 | 311642 | 1,19 | down |
| 6123746 | 7247976 | 1492433 | sulfatase 2                             | Sulf2 | 311642 | 3,49 | down |
| 6131617 | 7247976 | 1492459 | sulfatase 2                             | Sulf2 | 311642 | 1,47 | up   |
| 6170483 | 7247976 | 1492437 | sulfatase 2                             | Sulf2 | 311642 | 1,10 | down |
| 6226439 | 7247976 | 1492450 | sulfatase 2                             | Sulf2 | 311642 | 2,25 | up   |
| 6248092 | 7247976 | 1492443 | sulfatase 2                             | Sulf2 | 311642 | 1,55 | up   |
| 6413284 | 7247976 | 1492449 | sulfatase 2                             | Sulf2 | 311642 | 1,33 | up   |
| 6419988 | 7247976 | 1492432 | sulfatase 2                             | Sulf2 | 311642 | 1,69 | down |
| 6478559 | 7247976 | 1492436 | sulfatase 2                             | Sulf2 | 311642 | 1,25 | up   |
| 6501702 | 7247976 | 1492445 | sulfatase 2                             | Sulf2 | 311642 | 2,98 | down |
| 6511328 | 7247976 | 1492440 | sulfatase 2                             | Sulf2 | 311642 | 1,38 | down |
| 6516278 | 7247976 | 1492442 | sulfatase 2                             | Sulf2 | 311642 | 1,03 | up   |
| 6573400 | 7247976 | 1492459 | sulfatase 2                             | Sulf2 | 311642 | 1,13 | up   |
| 6599361 | 7247976 | 1492434 | sulfatase 2                             | Sulf2 | 311642 | 1,30 | up   |
| 6602933 | 7247976 | 1492459 | sulfatase 2                             | Sulf2 | 311642 | 1,10 | down |
| 6658468 | 7247976 | 1492438 | sulfatase 2                             | Sulf2 | 311642 | 1,59 | down |
| 6661161 | 7247976 | 1492441 | sulfatase 2                             | Sulf2 | 311642 | 1,52 | up   |
| 6668379 | 7247976 | 1492431 | sulfatase 2                             | Sulf2 | 311642 | 1,04 | down |
| 6712555 | 7247976 | 1492448 | sulfatase 2                             | Sulf2 | 311642 | 1,54 | down |
| 5817132 | 7097829 | 1122051 | sulfatase modifying factor 2            | Sumf2 | 360800 | 1,10 | down |
| 5841003 | 7097829 | 1122054 | sulfatase modifying factor 2            | Sumf2 | 360800 | 1,06 | down |
| 5918087 | 7097829 | 1122050 | sulfatase modifying factor 2            | Sumf2 | 360800 | 1,26 | down |
| 5941377 | 7097829 | 1122057 | sulfatase modifying factor 2            | Sumf2 | 360800 | 1,30 | up   |
| 6093135 | 7097829 | 1122055 | sulfatase modifying factor 2            | Sumf2 | 360800 | 1,02 | down |
| 6163818 | 7097829 | 1122057 | sulfatase modifying factor 2            | Sumf2 | 360800 | 1,35 | up   |
| 6205867 | 7097829 | 1122052 | sulfatase modifying factor 2            | Sumf2 | 360800 | 2,40 | down |
| 6218066 | 7097829 | 1122053 | sulfatase modifying factor 2            | Sumf2 | 360800 | 1,32 | down |
| 6293547 | 7097829 | 1122056 | sulfatase modifying factor 2            | Sumf2 | 360800 | 1,51 | up   |
| 5672886 | 7233921 | 1458153 | sulfiredoxin 1 homolog (S. cerevisiae)  | Srxn1 | 296271 | 1,69 | up   |
| 5758221 | 7233921 | 1458152 | sulfiredoxin 1 homolog (S. cerevisiae)  | Srxn1 | 296271 | 1,48 | up   |
| 6120458 | 7233921 | 1458154 | sulfiredoxin 1 homolog (S. cerevisiae)  | Srxn1 | 296271 | 1,32 | up   |
| 6130489 | 7233921 | 1458151 | sulfiredoxin 1 homolog (S. cerevisiae)  | Srxn1 | 296271 | 1,13 | down |
| 6308929 | 7233921 | 1458151 | sulfiredoxin 1 homolog (S. cerevisiae)  | Srxn1 | 296271 | 1,47 | down |
| 6347095 | 7233921 | 1458151 | sulfiredoxin 1 homolog (S. cerevisiae)  | Srxn1 | 296271 | 1,56 | up   |
| 5641120 | 7094920 | 1114881 | SUMO1/sentrin/SMT3 specific peptidase 2 | Senp2 | 78973  | 1,08 | up   |
| 5697306 | 7094920 | 1114884 | SUMO1/sentrin/SMT3 specific peptidase 2 | Senp2 | 78973  | 1,08 | down |

|         |         |         |                                                    |       |        |      |      |
|---------|---------|---------|----------------------------------------------------|-------|--------|------|------|
| 5825663 | 7094920 | 1114886 | SUMO1/sentrin/SMT3 specific peptidase 2            | Senp2 | 78973  | 1,07 | down |
| 5873484 | 7094920 | 1114890 | SUMO1/sentrin/SMT3 specific peptidase 2            | Senp2 | 78973  | 1,32 | up   |
| 5890215 | 7094920 | 1114887 | SUMO1/sentrin/SMT3 specific peptidase 2            | Senp2 | 78973  | 1,09 | down |
| 5916006 | 7094920 | 1114889 | SUMO1/sentrin/SMT3 specific peptidase 2            | Senp2 | 78973  | 1,03 | up   |
| 6121726 | 7094920 | 1114892 | SUMO1/sentrin/SMT3 specific peptidase 2            | Senp2 | 78973  | 1,46 | up   |
| 6171027 | 7094920 | 1114882 | SUMO1/sentrin/SMT3 specific peptidase 2            | Senp2 | 78973  | 1,00 | up   |
| 6211787 | 7094920 | 1114885 | SUMO1/sentrin/SMT3 specific peptidase 2            | Senp2 | 78973  | 1,13 | up   |
| 6271838 | 7094920 | 1114891 | SUMO1/sentrin/SMT3 specific peptidase 2            | Senp2 | 78973  | 1,09 | down |
| 6313659 | 7094920 | 1114878 | SUMO1/sentrin/SMT3 specific peptidase 2            | Senp2 | 78973  | 1,04 | up   |
| 6335048 | 7094920 | 1114893 | SUMO1/sentrin/SMT3 specific peptidase 2            | Senp2 | 78973  | 1,23 | down |
| 6424624 | 7094920 | 1114894 | SUMO1/sentrin/SMT3 specific peptidase 2            | Senp2 | 78973  | 1,00 | down |
| 6459163 | 7094920 | 1114889 | SUMO1/sentrin/SMT3 specific peptidase 2            | Senp2 | 78973  | 2,59 | up   |
| 6492689 | 7094920 | 1114879 | SUMO1/sentrin/SMT3 specific peptidase 2            | Senp2 | 78973  | 1,21 | down |
| 6518085 | 7094920 | 1114883 | SUMO1/sentrin/SMT3 specific peptidase 2            | Senp2 | 78973  | 1,15 | up   |
| 6591489 | 7094920 | 1114888 | SUMO1/sentrin/SMT3 specific peptidase 2            | Senp2 | 78973  | 1,15 | up   |
| 6683830 | 7094920 | 1114880 | SUMO1/sentrin/SMT3 specific peptidase 2            | Senp2 | 78973  | 1,13 | down |
| 5687418 | 7343701 | 1729273 | suppression of tumorigenicity 14 (colon carcinoma) | St14  | 114093 | 1,81 | up   |
| 5715628 | 7343701 | 1729274 | suppression of tumorigenicity 14 (colon carcinoma) | St14  | 114093 | 1,13 | up   |
| 5738422 | 7343701 | 1729264 | suppression of tumorigenicity 14 (colon carcinoma) | St14  | 114093 | 1,23 | down |
| 5742363 | 7343701 | 1729263 | suppression of tumorigenicity 14 (colon carcinoma) | St14  | 114093 | 1,06 | down |
| 5824931 | 7343701 | 1729262 | suppression of tumorigenicity 14 (colon carcinoma) | St14  | 114093 | 1,52 | up   |
| 5864430 | 7343701 | 1729260 | suppression of tumorigenicity 14 (colon carcinoma) | St14  | 114093 | 1,46 | down |
| 5887530 | 7343701 | 1729265 | suppression of tumorigenicity 14 (colon carcinoma) | St14  | 114093 | 1,05 | down |
| 5928584 | 7343701 | 1729257 | suppression of tumorigenicity 14 (colon carcinoma) | St14  | 114093 | 1,32 | up   |
| 5964955 | 7343701 | 1729268 | suppression of tumorigenicity 14 (colon carcinoma) | St14  | 114093 | 1,37 | up   |
| 6000773 | 7343701 | 1729257 | suppression of tumorigenicity 14 (colon carcinoma) | St14  | 114093 | 1,56 | down |
| 6016137 | 7343701 | 1729267 | suppression of tumorigenicity 14 (colon carcinoma) | St14  | 114093 | 1,15 | down |
| 6030103 | 7343701 | 1729256 | suppression of tumorigenicity 14 (colon carcinoma) | St14  | 114093 | 2,54 | down |
| 6038979 | 7343701 | 1729261 | suppression of tumorigenicity 14 (colon carcinoma) | St14  | 114093 | 1,24 | up   |
| 6209798 | 7343701 | 1729262 | suppression of tumorigenicity 14 (colon carcinoma) | St14  | 114093 | 1,50 | down |
| 6246336 | 7343701 | 1729272 | suppression of tumorigenicity 14 (colon carcinoma) | St14  | 114093 | 1,10 | up   |
| 6288004 | 7343701 | 1729259 | suppression of tumorigenicity 14 (colon carcinoma) | St14  | 114093 | 1,08 | up   |
| 6359697 | 7343701 | 1729271 | suppression of tumorigenicity 14 (colon carcinoma) | St14  | 114093 | 1,45 | up   |
| 6484334 | 7343701 | 1729269 | suppression of tumorigenicity 14 (colon carcinoma) | St14  | 114093 | 1,38 | down |
| 6514428 | 7343701 | 1729269 | suppression of tumorigenicity 14 (colon carcinoma) | St14  | 114093 | 1,49 | up   |
| 6515564 | 7343701 | 1729266 | suppression of tumorigenicity 14 (colon carcinoma) | St14  | 114093 | 1,07 | down |
| 6611379 | 7343701 | 1729269 | suppression of tumorigenicity 14 (colon carcinoma) | St14  | 114093 | 1,16 | down |
| 6679519 | 7343701 | 1729270 | suppression of tumorigenicity 14 (colon carcinoma) | St14  | 114093 | 1,71 | up   |
| 6685417 | 7343701 | 1729258 | suppression of tumorigenicity 14 (colon carcinoma) | St14  | 114093 | 1,04 | up   |
| 5744801 | 7197704 | 1369804 | suppression of tumorigenicity 7-like               | St7l  | 295344 | 2,54 | up   |
| 5775393 | 7197704 | 1369807 | suppression of tumorigenicity 7-like               | St7l  | 295344 | 1,07 | up   |
| 5778975 | 7197704 | 1369804 | suppression of tumorigenicity 7-like               | St7l  | 295344 | 1,39 | down |
| 5804807 | 7197704 | 1369811 | suppression of tumorigenicity 7-like               | St7l  | 295344 | 1,29 | down |
| 5998187 | 7197704 | 1369813 | suppression of tumorigenicity 7-like               | St7l  | 295344 | 1,01 | down |
| 6000278 | 7197704 | 1369817 | suppression of tumorigenicity 7-like               | St7l  | 295344 | 1,02 | up   |
| 6090977 | 7197704 | 1369805 | suppression of tumorigenicity 7-like               | St7l  | 295344 | 1,09 | up   |
| 6100987 | 7197704 | 1369818 | suppression of tumorigenicity 7-like               | St7l  | 295344 | 1,31 | up   |
| 6208679 | 7197704 | 1369812 | suppression of tumorigenicity 7-like               | St7l  | 295344 | 1,23 | up   |
| 6276163 | 7197704 | 1369808 | suppression of tumorigenicity 7-like               | St7l  | 295344 | 1,39 | up   |
| 6335334 | 7197704 | 1369814 | suppression of tumorigenicity 7-like               | St7l  | 295344 | 1,07 | down |
| 6390199 | 7197704 | 1369815 | suppression of tumorigenicity 7-like               | St7l  | 295344 | 1,19 | down |
| 6609220 | 7197704 | 1369816 | suppression of tumorigenicity 7-like               | St7l  | 295344 | 1,06 | down |
| 6643343 | 7197704 | 1369810 | suppression of tumorigenicity 7-like               | St7l  | 295344 | 1,13 | up   |
| 6655168 | 7197704 | 1369806 | suppression of tumorigenicity 7-like               | St7l  | 295344 | 1,14 | down |
| 6706878 | 7197704 | 1369809 | suppression of tumorigenicity 7-like               | St7l  | 295344 | 1,18 | down |
| 6739951 | 7197704 | 1369812 | suppression of tumorigenicity 7-like               | St7l  | 295344 | 1,18 | up   |



|         |         |         |                                                             |         |        |      |      |
|---------|---------|---------|-------------------------------------------------------------|---------|--------|------|------|
| 5807110 | 7071714 | 1060366 | suppressor of cytokine signaling 7                          | Socs7   | 287659 | 1,16 | up   |
| 5895929 | 7098810 | 1124659 | suppressor of defective silencing 3 homolog (S. cerevisiae) | Suds3   | 360819 | 1,58 | down |
| 6201282 | 7098810 | 1124659 | suppressor of defective silencing 3 homolog (S. cerevisiae) | Suds3   | 360819 | 1,23 | down |
| 6209558 | 7098810 | 1124659 | suppressor of defective silencing 3 homolog (S. cerevisiae) | Suds3   | 360819 | 1,15 | up   |
| 6274978 | 7098810 | 1124659 | suppressor of defective silencing 3 homolog (S. cerevisiae) | Suds3   | 360819 | 1,05 | up   |
| 6350215 | 7098810 | 1124659 | suppressor of defective silencing 3 homolog (S. cerevisiae) | Suds3   | 360819 | 1,02 | up   |
| 5919499 | 7373658 | 1805808 | suppressor of variegation 3-9 homolog 1 (Drosophila)        | Suv39h1 | 302553 | 1,65 | up   |
| 6080130 | 7373658 | 1805797 | suppressor of variegation 3-9 homolog 1 (Drosophila)        | Suv39h1 | 302553 | 2,12 | down |
| 6203905 | 7373658 | 1805801 | suppressor of variegation 3-9 homolog 1 (Drosophila)        | Suv39h1 | 302553 | 1,40 | down |
| 6269086 | 7373658 | 1805797 | suppressor of variegation 3-9 homolog 1 (Drosophila)        | Suv39h1 | 302553 | 1,16 | down |
| 6320510 | 7373658 | 1805809 | suppressor of variegation 3-9 homolog 1 (Drosophila)        | Suv39h1 | 302553 | 1,09 | up   |
| 6323039 | 7373658 | 1805800 | suppressor of variegation 3-9 homolog 1 (Drosophila)        | Suv39h1 | 302553 | 1,26 | up   |
| 6424141 | 7373658 | 1805807 | suppressor of variegation 3-9 homolog 1 (Drosophila)        | Suv39h1 | 302553 | 1,30 | up   |
| 6735360 | 7373658 | 1805809 | suppressor of variegation 3-9 homolog 1 (Drosophila)        | Suv39h1 | 302553 | 1,71 | up   |
| 5737064 | 7160174 | 1275668 | suppressor of variegation 3-9 homolog 2 (Drosophila)        | Suv39h2 | 364785 | 2,23 | down |
| 5739596 | 7160174 | 1275668 | suppressor of variegation 3-9 homolog 2 (Drosophila)        | Suv39h2 | 364785 | 1,72 | up   |
| 5751746 | 7160174 | 1275671 | suppressor of variegation 3-9 homolog 2 (Drosophila)        | Suv39h2 | 364785 | 1,00 | up   |
| 5874343 | 7160174 | 1275672 | suppressor of variegation 3-9 homolog 2 (Drosophila)        | Suv39h2 | 364785 | 1,09 | up   |
| 6132085 | 7160174 | 1275674 | suppressor of variegation 3-9 homolog 2 (Drosophila)        | Suv39h2 | 364785 | 1,03 | down |
| 6192368 | 7160174 | 1275671 | suppressor of variegation 3-9 homolog 2 (Drosophila)        | Suv39h2 | 364785 | 1,16 | up   |
| 6359236 | 7160174 | 1275671 | suppressor of variegation 3-9 homolog 2 (Drosophila)        | Suv39h2 | 364785 | 1,82 | down |
| 6423403 | 7160174 | 1275671 | suppressor of variegation 3-9 homolog 2 (Drosophila)        | Suv39h2 | 364785 | 1,06 | up   |
| 6446772 | 7160174 | 1275674 | suppressor of variegation 3-9 homolog 2 (Drosophila)        | Suv39h2 | 364785 | 1,32 | down |
| 6561834 | 7160174 | 1275669 | suppressor of variegation 3-9 homolog 2 (Drosophila)        | Suv39h2 | 364785 | 1,17 | up   |
| 6641075 | 7160174 | 1275673 | suppressor of variegation 3-9 homolog 2 (Drosophila)        | Suv39h2 | 364785 | 1,01 | down |
| 5710921 | 7237053 | 1465961 | surfeit 1                                                   | Surf1   | 64463  | 1,22 | up   |
| 5957222 | 7237053 | 1465954 | surfeit 1                                                   | Surf1   | 64463  | 1,06 | up   |
| 5995498 | 7237053 | 1465957 | surfeit 1                                                   | Surf1   | 64463  | 1,01 | up   |
| 6049962 | 7237053 | 1465958 | surfeit 1                                                   | Surf1   | 64463  | 1,11 | down |
| 6137534 | 7237053 | 1465962 | surfeit 1                                                   | Surf1   | 64463  | 2,72 | down |
| 6332198 | 7237053 | 1465954 | surfeit 1                                                   | Surf1   | 64463  | 1,28 | down |
| 6437704 | 7237053 | 1465956 | surfeit 1                                                   | Surf1   | 64463  | 1,12 | down |
| 6534221 | 7237053 | 1465959 | surfeit 1                                                   | Surf1   | 64463  | 1,27 | up   |
| 6580245 | 7237053 | 1465955 | surfeit 1                                                   | Surf1   | 64463  | 1,39 | down |
| 6614550 | 7237053 | 1465960 | surfeit 1                                                   | Surf1   | 64463  | 1,14 | up   |
| 6694302 | 7237053 | 1465962 | surfeit 1                                                   | Surf1   | 64463  | 1,00 | up   |
| 5693312 | 7063873 | 1040642 | survival motor neuron domain containing 1                   | Smndc1  | 287768 | 1,13 | down |
| 6045895 | 7063873 | 1040643 | survival motor neuron domain containing 1                   | Smndc1  | 287768 | 1,17 | up   |
| 6186202 | 7063873 | 1040653 | survival motor neuron domain containing 1                   | Smndc1  | 287768 | 1,36 | down |
| 6221715 | 7063873 | 1040645 | survival motor neuron domain containing 1                   | Smndc1  | 287768 | 2,02 | up   |
| 6311525 | 7063873 | 1040644 | survival motor neuron domain containing 1                   | Smndc1  | 287768 | 1,48 | up   |
| 6441404 | 7063873 | 1040649 | survival motor neuron domain containing 1                   | Smndc1  | 287768 | 1,41 | up   |
| 6527328 | 7063873 | 1040642 | survival motor neuron domain containing 1                   | Smndc1  | 287768 | 1,16 | up   |
| 6617154 | 7063873 | 1040642 | survival motor neuron domain containing 1                   | Smndc1  | 287768 | 1,10 | down |
| 6647506 | 7063873 | 1040646 | survival motor neuron domain containing 1                   | Smndc1  | 287768 | 1,00 | down |
| 6732361 | 7063873 | 1040642 | survival motor neuron domain containing 1                   | Smndc1  | 287768 | 1,26 | down |
| 5759494 | 7156044 | 1265718 | sushi domain containing 3                                   | Susd3   | 306810 | 1,39 | up   |
| 5807992 | 7156044 | 1265714 | sushi domain containing 3                                   | Susd3   | 306810 | 1,10 | down |
| 5880601 | 7156044 | 1265717 | sushi domain containing 3                                   | Susd3   | 306810 | 2,10 | down |
| 6128625 | 7156044 | 1265711 | sushi domain containing 3                                   | Susd3   | 306810 | 1,12 | down |
| 6202331 | 7156044 | 1265711 | sushi domain containing 3                                   | Susd3   | 306810 | 1,24 | up   |
| 6261574 | 7156044 | 1265713 | sushi domain containing 3                                   | Susd3   | 306810 | 1,24 | up   |
| 6491337 | 7156044 | 1265714 | sushi domain containing 3                                   | Susd3   | 306810 | 1,05 | down |
| 6592511 | 7156044 | 1265718 | sushi domain containing 3                                   | Susd3   | 306810 | 1,15 | up   |
| 6602066 | 7156044 | 1265713 | sushi domain containing 3                                   | Susd3   | 306810 | 1,51 | up   |
| 6639311 | 7156044 | 1265717 | sushi domain containing 3                                   | Susd3   | 306810 | 1,39 | down |

|         |         |         |                                                                                  |          |        |      |      |
|---------|---------|---------|----------------------------------------------------------------------------------|----------|--------|------|------|
| 5743009 | 7357815 | 1764137 | sushi, nidogen and EGF-like domains 1                                            | Sned1    | 316638 | 1,07 | down |
| 5756972 | 7357815 | 1764162 | sushi, nidogen and EGF-like domains 1                                            | Sned1    | 316638 | 1,34 | down |
| 5767148 | 7357815 | 1764156 | sushi, nidogen and EGF-like domains 1                                            | Sned1    | 316638 | 1,19 | up   |
| 5834048 | 7357815 | 1764166 | sushi, nidogen and EGF-like domains 1                                            | Sned1    | 316638 | 1,85 | down |
| 5897366 | 7357815 | 1764166 | sushi, nidogen and EGF-like domains 1                                            | Sned1    | 316638 | 1,18 | up   |
| 5938629 | 7357815 | 1764157 | sushi, nidogen and EGF-like domains 1                                            | Sned1    | 316638 | 1,25 | down |
| 6022415 | 7357815 | 1764160 | sushi, nidogen and EGF-like domains 1                                            | Sned1    | 316638 | 1,15 | up   |
| 6042052 | 7357815 | 1764165 | sushi, nidogen and EGF-like domains 1                                            | Sned1    | 316638 | 1,12 | up   |
| 6104768 | 7357815 | 1764163 | sushi, nidogen and EGF-like domains 1                                            | Sned1    | 316638 | 1,18 | down |
| 6131325 | 7357815 | 1764166 | sushi, nidogen and EGF-like domains 1                                            | Sned1    | 316638 | 1,02 | down |
| 6168990 | 7357815 | 1764154 | sushi, nidogen and EGF-like domains 1                                            | Sned1    | 316638 | 1,73 | down |
| 6254923 | 7357815 | 1764155 | sushi, nidogen and EGF-like domains 1                                            | Sned1    | 316638 | 1,35 | up   |
| 6289832 | 7357815 | 1764145 | sushi, nidogen and EGF-like domains 1                                            | Sned1    | 316638 | 1,11 | up   |
| 6315023 | 7357815 | 1764153 | sushi, nidogen and EGF-like domains 1                                            | Sned1    | 316638 | 1,12 | up   |
| 6339453 | 7357815 | 1764160 | sushi, nidogen and EGF-like domains 1                                            | Sned1    | 316638 | 1,25 | down |
| 6353623 | 7357815 | 1764139 | sushi, nidogen and EGF-like domains 1                                            | Sned1    | 316638 | 1,95 | down |
| 6364878 | 7357815 | 1764136 | sushi, nidogen and EGF-like domains 1                                            | Sned1    | 316638 | 1,08 | up   |
| 6403690 | 7357815 | 1764157 | sushi, nidogen and EGF-like domains 1                                            | Sned1    | 316638 | 1,12 | up   |
| 6410132 | 7357815 | 1764144 | sushi, nidogen and EGF-like domains 1                                            | Sned1    | 316638 | 1,21 | down |
| 6438757 | 7357815 | 1764166 | sushi, nidogen and EGF-like domains 1                                            | Sned1    | 316638 | 1,17 | down |
| 6440503 | 7357815 | 1764141 | sushi, nidogen and EGF-like domains 1                                            | Sned1    | 316638 | 1,58 | down |
| 6466521 | 7357815 | 1764161 | sushi, nidogen and EGF-like domains 1                                            | Sned1    | 316638 | 1,24 | down |
| 6466828 | 7357815 | 1764141 | sushi, nidogen and EGF-like domains 1                                            | Sned1    | 316638 | 1,14 | up   |
| 6477381 | 7357815 | 1764140 | sushi, nidogen and EGF-like domains 1                                            | Sned1    | 316638 | 1,32 | down |
| 6547832 | 7357815 | 1764146 | sushi, nidogen and EGF-like domains 1                                            | Sned1    | 316638 | 1,28 | down |
| 6588562 | 7357815 | 1764151 | sushi, nidogen and EGF-like domains 1                                            | Sned1    | 316638 | 1,50 | down |
| 6596005 | 7357815 | 1764159 | sushi, nidogen and EGF-like domains 1                                            | Sned1    | 316638 | 1,18 | down |
| 6640025 | 7357815 | 1764158 | sushi, nidogen and EGF-like domains 1                                            | Sned1    | 316638 | 1,57 | up   |
| 6642753 | 7357815 | 1764143 | sushi, nidogen and EGF-like domains 1                                            | Sned1    | 316638 | 1,56 | up   |
| 6686791 | 7357815 | 1764159 | sushi, nidogen and EGF-like domains 1                                            | Sned1    | 316638 | 2,45 | up   |
| 6743188 | 7357815 | 1764146 | sushi, nidogen and EGF-like domains 1                                            | Sned1    | 316638 | 1,30 | down |
| 5740215 | 7035414 | 974473  | SWAP-70 protein                                                                  | Swap70   | 293410 | 1,13 | down |
| 6193956 | 7035414 | 974465  | SWAP-70 protein                                                                  | Swap70   | 293410 | 1,14 | up   |
| 6197886 | 7035414 | 974463  | SWAP-70 protein                                                                  | Swap70   | 293410 | 2,30 | down |
| 6211812 | 7035414 | 974470  | SWAP-70 protein                                                                  | Swap70   | 293410 | 1,08 | up   |
| 6243286 | 7035414 | 974472  | SWAP-70 protein                                                                  | Swap70   | 293410 | 1,35 | down |
| 6269025 | 7035414 | 974467  | SWAP-70 protein                                                                  | Swap70   | 293410 | 2,30 | up   |
| 6304065 | 7035414 | 974469  | SWAP-70 protein                                                                  | Swap70   | 293410 | 1,12 | up   |
| 6405054 | 7035414 | 974476  | SWAP-70 protein                                                                  | Swap70   | 293410 | 1,32 | down |
| 6439789 | 7035414 | 974474  | SWAP-70 protein                                                                  | Swap70   | 293410 | 1,38 | up   |
| 6450595 | 7035414 | 974471  | SWAP-70 protein                                                                  | Swap70   | 293410 | 1,05 | down |
| 6459062 | 7035414 | 974475  | SWAP-70 protein                                                                  | Swap70   | 293410 | 1,11 | down |
| 6532372 | 7035414 | 974466  | SWAP-70 protein                                                                  | Swap70   | 293410 | 1,03 | down |
| 6577156 | 7035414 | 974468  | SWAP-70 protein                                                                  | Swap70   | 293410 | 2,07 | up   |
| 5664788 | 7254405 | 1508664 | SWI/SNF-related, matrix-associated actin-dependent regulator of chromatin, subfa | Smarcad1 | 312398 | 1,51 | up   |
| 5680774 | 7254405 | 1508655 | SWI/SNF-related, matrix-associated actin-dependent regulator of chromatin, subfa | Smarcad1 | 312398 | 1,07 | up   |
| 5683318 | 7254405 | 1508659 | SWI/SNF-related, matrix-associated actin-dependent regulator of chromatin, subfa | Smarcad1 | 312398 | 1,04 | up   |
| 5736055 | 7254405 | 1508663 | SWI/SNF-related, matrix-associated actin-dependent regulator of chromatin, subfa | Smarcad1 | 312398 | 1,51 | down |
| 5762080 | 7254405 | 1508658 | SWI/SNF-related, matrix-associated actin-dependent regulator of chromatin, subfa | Smarcad1 | 312398 | 1,03 | up   |
| 5783452 | 7254405 | 1508665 | SWI/SNF-related, matrix-associated actin-dependent regulator of chromatin, subfa | Smarcad1 | 312398 | 1,12 | up   |
| 5815753 | 7254405 | 1508671 | SWI/SNF-related, matrix-associated actin-dependent regulator of chromatin, subfa | Smarcad1 | 312398 | 1,51 | down |
| 5827430 | 7254405 | 1508660 | SWI/SNF-related, matrix-associated actin-dependent regulator of chromatin, subfa | Smarcad1 | 312398 | 1,22 | up   |
| 5887397 | 7254405 | 1508648 | SWI/SNF-related, matrix-associated actin-dependent regulator of chromatin, subfa | Smarcad1 | 312398 | 1,08 | up   |
| 5914910 | 7254405 | 1508643 | SWI/SNF-related, matrix-associated actin-dependent regulator of chromatin, subfa | Smarcad1 | 312398 | 1,51 | down |
| 6000751 | 7254405 | 1508645 | SWI/SNF-related, matrix-associated actin-dependent regulator of chromatin, subfa | Smarcad1 | 312398 | 1,11 | up   |
| 6029605 | 7254405 | 1508671 | SWI/SNF-related, matrix-associated actin-dependent regulator of chromatin, subfa | Smarcad1 | 312398 | 1,20 | down |

|         |         |         |                                                                                  |          |        |      |      |
|---------|---------|---------|----------------------------------------------------------------------------------|----------|--------|------|------|
| 6100555 | 7254405 | 1508655 | SWI/SNF-related, matrix-associated actin-dependent regulator of chromatin, subfa | Smarcad1 | 312398 | 1,20 | up   |
| 6107620 | 7254405 | 1508668 | SWI/SNF-related, matrix-associated actin-dependent regulator of chromatin, subfa | Smarcad1 | 312398 | 1,04 | down |
| 6124191 | 7254405 | 1508670 | SWI/SNF-related, matrix-associated actin-dependent regulator of chromatin, subfa | Smarcad1 | 312398 | 1,17 | down |
| 6145216 | 7254405 | 1508649 | SWI/SNF-related, matrix-associated actin-dependent regulator of chromatin, subfa | Smarcad1 | 312398 | 1,08 | down |
| 6150685 | 7254405 | 1508640 | SWI/SNF-related, matrix-associated actin-dependent regulator of chromatin, subfa | Smarcad1 | 312398 | 1,86 | down |
| 6249629 | 7254405 | 1508662 | SWI/SNF-related, matrix-associated actin-dependent regulator of chromatin, subfa | Smarcad1 | 312398 | 1,06 | up   |
| 6417248 | 7254405 | 1508651 | SWI/SNF-related, matrix-associated actin-dependent regulator of chromatin, subfa | Smarcad1 | 312398 | 1,07 | down |
| 6434238 | 7254405 | 1508659 | SWI/SNF-related, matrix-associated actin-dependent regulator of chromatin, subfa | Smarcad1 | 312398 | 1,14 | up   |
| 6448402 | 7254405 | 1508667 | SWI/SNF-related, matrix-associated actin-dependent regulator of chromatin, subfa | Smarcad1 | 312398 | 1,06 | up   |
| 6504941 | 7254405 | 1508667 | SWI/SNF-related, matrix-associated actin-dependent regulator of chromatin, subfa | Smarcad1 | 312398 | 1,23 | up   |
| 6538653 | 7254405 | 1508647 | SWI/SNF-related, matrix-associated actin-dependent regulator of chromatin, subfa | Smarcad1 | 312398 | 1,36 | down |
| 6555148 | 7254405 | 1508669 | SWI/SNF-related, matrix-associated actin-dependent regulator of chromatin, subfa | Smarcad1 | 312398 | 1,22 | down |
| 6560383 | 7254405 | 1508661 | SWI/SNF-related, matrix-associated actin-dependent regulator of chromatin, subfa | Smarcad1 | 312398 | 1,12 | down |
| 6570266 | 7254405 | 1508666 | SWI/SNF-related, matrix-associated actin-dependent regulator of chromatin, subfa | Smarcad1 | 312398 | 1,71 | up   |
| 6601374 | 7254405 | 1508644 | SWI/SNF-related, matrix-associated actin-dependent regulator of chromatin, subfa | Smarcad1 | 312398 | 1,36 | up   |
| 6708847 | 7254405 | 1508658 | SWI/SNF-related, matrix-associated actin-dependent regulator of chromatin, subfa | Smarcad1 | 312398 | 1,07 | down |
| 5658745 | 7202618 | 1381748 | synaptic vesicle glycoprotein 2c                                                 | Sv2c     | 29643  | 1,62 | up   |
| 5785540 | 7202618 | 1381742 | synaptic vesicle glycoprotein 2c                                                 | Sv2c     | 29643  | 1,54 | up   |
| 5937610 | 7202618 | 1381737 | synaptic vesicle glycoprotein 2c                                                 | Sv2c     | 29643  | 2,49 | down |
| 5965442 | 7202618 | 1381738 | synaptic vesicle glycoprotein 2c                                                 | Sv2c     | 29643  | 2,04 | down |
| 6092027 | 7202618 | 1381748 | synaptic vesicle glycoprotein 2c                                                 | Sv2c     | 29643  | 1,14 | up   |
| 6105529 | 7202618 | 1381746 | synaptic vesicle glycoprotein 2c                                                 | Sv2c     | 29643  | 1,45 | up   |
| 6274088 | 7202618 | 1381739 | synaptic vesicle glycoprotein 2c                                                 | Sv2c     | 29643  | 2,14 | down |
| 6284412 | 7202618 | 1381743 | synaptic vesicle glycoprotein 2c                                                 | Sv2c     | 29643  | 1,13 | down |
| 6483142 | 7202618 | 1381745 | synaptic vesicle glycoprotein 2c                                                 | Sv2c     | 29643  | 1,05 | down |
| 6485162 | 7202618 | 1381744 | synaptic vesicle glycoprotein 2c                                                 | Sv2c     | 29643  | 1,34 | up   |
| 6591864 | 7202618 | 1381740 | synaptic vesicle glycoprotein 2c                                                 | Sv2c     | 29643  | 2,22 | down |
| 6644343 | 7202618 | 1381747 | synaptic vesicle glycoprotein 2c                                                 | Sv2c     | 29643  | 1,78 | up   |
| 6734879 | 7202618 | 1381741 | synaptic vesicle glycoprotein 2c                                                 | Sv2c     | 29643  | 1,28 | down |
| 5626673 | 7026892 | 953668  | synaptojanin 2                                                                   | Synj2    | 84018  | 1,29 | up   |
| 5634785 | 7026892 | 953655  | synaptojanin 2                                                                   | Synj2    | 84018  | 1,23 | down |
| 5687822 | 7026892 | 953669  | synaptojanin 2                                                                   | Synj2    | 84018  | 1,17 | up   |
| 5691977 | 7026892 | 953660  | synaptojanin 2                                                                   | Synj2    | 84018  | 1,14 | down |
| 5741903 | 7026892 | 953666  | synaptojanin 2                                                                   | Synj2    | 84018  | 1,36 | down |
| 5811795 | 7026892 | 953646  | synaptojanin 2                                                                   | Synj2    | 84018  | 1,56 | up   |
| 5829237 | 7026892 | 953663  | synaptojanin 2                                                                   | Synj2    | 84018  | 1,38 | up   |
| 5838628 | 7026892 | 953672  | synaptojanin 2                                                                   | Synj2    | 84018  | 1,20 | up   |
| 5840049 | 7026892 | 953665  | synaptojanin 2                                                                   | Synj2    | 84018  | 1,42 | up   |
| 5960997 | 7026892 | 953670  | synaptojanin 2                                                                   | Synj2    | 84018  | 1,29 | down |
| 5965157 | 7026892 | 953656  | synaptojanin 2                                                                   | Synj2    | 84018  | 1,10 | down |
| 6062313 | 7026892 | 953646  | synaptojanin 2                                                                   | Synj2    | 84018  | 1,77 | up   |
| 6125043 | 7026892 | 953651  | synaptojanin 2                                                                   | Synj2    | 84018  | 1,27 | up   |
| 6142505 | 7026892 | 953653  | synaptojanin 2                                                                   | Synj2    | 84018  | 1,11 | up   |
| 6163248 | 7026892 | 953647  | synaptojanin 2                                                                   | Synj2    | 84018  | 1,17 | up   |
| 6163907 | 7026892 | 953659  | synaptojanin 2                                                                   | Synj2    | 84018  | 1,92 | down |
| 6164127 | 7026892 | 953654  | synaptojanin 2                                                                   | Synj2    | 84018  | 1,34 | down |
| 6199521 | 7026892 | 953672  | synaptojanin 2                                                                   | Synj2    | 84018  | 2,43 | down |
| 6200189 | 7026892 | 953648  | synaptojanin 2                                                                   | Synj2    | 84018  | 1,15 | down |
| 6217262 | 7026892 | 953647  | synaptojanin 2                                                                   | Synj2    | 84018  | 1,08 | down |
| 6219842 | 7026892 | 953649  | synaptojanin 2                                                                   | Synj2    | 84018  | 1,23 | up   |
| 6254139 | 7026892 | 953671  | synaptojanin 2                                                                   | Synj2    | 84018  | 1,37 | up   |
| 6261024 | 7026892 | 953662  | synaptojanin 2                                                                   | Synj2    | 84018  | 1,53 | down |
| 6275401 | 7026892 | 953671  | synaptojanin 2                                                                   | Synj2    | 84018  | 1,52 | down |
| 6295714 | 7026892 | 953658  | synaptojanin 2                                                                   | Synj2    | 84018  | 1,18 | down |
| 6344249 | 7026892 | 953661  | synaptojanin 2                                                                   | Synj2    | 84018  | 1,11 | up   |
| 6361962 | 7026892 | 953667  | synaptojanin 2                                                                   | Synj2    | 84018  | 1,03 | up   |

|         |         |         |                                |         |        |      |      |
|---------|---------|---------|--------------------------------|---------|--------|------|------|
| 6390597 | 7026892 | 953672  | synaptojanin 2                 | Synj2   | 84018  | 1,03 | down |
| 6495532 | 7026892 | 953657  | synaptojanin 2                 | Synj2   | 84018  | 1,05 | up   |
| 6519397 | 7026892 | 953652  | synaptojanin 2                 | Synj2   | 84018  | 1,22 | up   |
| 6622157 | 7026892 | 953650  | synaptojanin 2                 | Synj2   | 84018  | 1,32 | down |
| 6649954 | 7026892 | 953650  | synaptojanin 2                 | Synj2   | 84018  | 1,33 | up   |
| 6673849 | 7026892 | 953664  | synaptojanin 2                 | Synj2   | 84018  | 1,18 | down |
| 5654427 | 7248683 | 1494138 | synaptonemal complex protein 2 | Sycp2   | 83820  | 1,38 | down |
| 5659786 | 7248683 | 1494112 | synaptonemal complex protein 2 | Sycp2   | 83820  | 1,05 | down |
| 5665537 | 7248683 | 1494115 | synaptonemal complex protein 2 | Sycp2   | 83820  | 1,07 | up   |
| 5673412 | 7248683 | 1494140 | synaptonemal complex protein 2 | Sycp2   | 83820  | 1,40 | down |
| 5703407 | 7248683 | 1494130 | synaptonemal complex protein 2 | Sycp2   | 83820  | 1,10 | down |
| 5711048 | 7248683 | 1494118 | synaptonemal complex protein 2 | Sycp2   | 83820  | 1,22 | down |
| 5732512 | 7248683 | 1494127 | synaptonemal complex protein 2 | Sycp2   | 83820  | 1,12 | up   |
| 5763938 | 7248683 | 1494135 | synaptonemal complex protein 2 | Sycp2   | 83820  | 1,55 | up   |
| 5776570 | 7248683 | 1494133 | synaptonemal complex protein 2 | Sycp2   | 83820  | 1,15 | down |
| 5801630 | 7248683 | 1494119 | synaptonemal complex protein 2 | Sycp2   | 83820  | 1,26 | down |
| 5822588 | 7248683 | 1494139 | synaptonemal complex protein 2 | Sycp2   | 83820  | 1,15 | down |
| 5831528 | 7248683 | 1494142 | synaptonemal complex protein 2 | Sycp2   | 83820  | 1,20 | down |
| 5834349 | 7248683 | 1494147 | synaptonemal complex protein 2 | Sycp2   | 83820  | 1,79 | up   |
| 5924699 | 7248683 | 1494110 | synaptonemal complex protein 2 | Sycp2   | 83820  | 1,20 | up   |
| 5951883 | 7248683 | 1494120 | synaptonemal complex protein 2 | Sycp2   | 83820  | 1,33 | down |
| 5969498 | 7248683 | 1494148 | synaptonemal complex protein 2 | Sycp2   | 83820  | 1,14 | up   |
| 5982495 | 7248683 | 1494132 | synaptonemal complex protein 2 | Sycp2   | 83820  | 1,01 | down |
| 6035072 | 7248683 | 1494109 | synaptonemal complex protein 2 | Sycp2   | 83820  | 1,07 | up   |
| 6051506 | 7248683 | 1494108 | synaptonemal complex protein 2 | Sycp2   | 83820  | 1,20 | up   |
| 6080656 | 7248683 | 1494111 | synaptonemal complex protein 2 | Sycp2   | 83820  | 1,17 | up   |
| 6118008 | 7248683 | 1494117 | synaptonemal complex protein 2 | Sycp2   | 83820  | 1,60 | down |
| 6123550 | 7248683 | 1494122 | synaptonemal complex protein 2 | Sycp2   | 83820  | 1,09 | down |
| 6155978 | 7248683 | 1494106 | synaptonemal complex protein 2 | Sycp2   | 83820  | 1,04 | up   |
| 6163152 | 7248683 | 1494113 | synaptonemal complex protein 2 | Sycp2   | 83820  | 1,11 | down |
| 6184378 | 7248683 | 1494131 | synaptonemal complex protein 2 | Sycp2   | 83820  | 1,38 | down |
| 6228263 | 7248683 | 1494136 | synaptonemal complex protein 2 | Sycp2   | 83820  | 1,26 | down |
| 6253799 | 7248683 | 1494124 | synaptonemal complex protein 2 | Sycp2   | 83820  | 1,07 | up   |
| 6283122 | 7248683 | 1494107 | synaptonemal complex protein 2 | Sycp2   | 83820  | 1,12 | down |
| 6370348 | 7248683 | 1494141 | synaptonemal complex protein 2 | Sycp2   | 83820  | 1,32 | down |
| 6370524 | 7248683 | 1494126 | synaptonemal complex protein 2 | Sycp2   | 83820  | 1,06 | up   |
| 6391561 | 7248683 | 1494125 | synaptonemal complex protein 2 | Sycp2   | 83820  | 1,10 | down |
| 6418997 | 7248683 | 1494137 | synaptonemal complex protein 2 | Sycp2   | 83820  | 1,10 | down |
| 6451601 | 7248683 | 1494144 | synaptonemal complex protein 2 | Sycp2   | 83820  | 1,73 | down |
| 6459673 | 7248683 | 1494143 | synaptonemal complex protein 2 | Sycp2   | 83820  | 1,97 | down |
| 6478443 | 7248683 | 1494116 | synaptonemal complex protein 2 | Sycp2   | 83820  | 2,63 | down |
| 6523921 | 7248683 | 1494129 | synaptonemal complex protein 2 | Sycp2   | 83820  | 1,07 | up   |
| 6550080 | 7248683 | 1494145 | synaptonemal complex protein 2 | Sycp2   | 83820  | 1,11 | up   |
| 6557424 | 7248683 | 1494128 | synaptonemal complex protein 2 | Sycp2   | 83820  | 1,11 | up   |
| 6584271 | 7248683 | 1494106 | synaptonemal complex protein 2 | Sycp2   | 83820  | 1,12 | up   |
| 6598669 | 7248683 | 1494123 | synaptonemal complex protein 2 | Sycp2   | 83820  | 1,26 | down |
| 6632191 | 7248683 | 1494148 | synaptonemal complex protein 2 | Sycp2   | 83820  | 1,02 | down |
| 6633720 | 7248683 | 1494114 | synaptonemal complex protein 2 | Sycp2   | 83820  | 1,25 | down |
| 6683481 | 7248683 | 1494134 | synaptonemal complex protein 2 | Sycp2   | 83820  | 1,03 | down |
| 6703329 | 7248683 | 1494121 | synaptonemal complex protein 2 | Sycp2   | 83820  | 1,11 | up   |
| 6714431 | 7248683 | 1494112 | synaptonemal complex protein 2 | Sycp2   | 83820  | 1,16 | up   |
| 6744412 | 7248683 | 1494146 | synaptonemal complex protein 2 | Sycp2   | 83820  | 1,97 | down |
| 5705764 | 7129841 | 1200829 | synaptopodin 2-like            | Synpo2l | 305675 | 1,43 | up   |
| 5649475 | 7174110 | 1310411 | synaptotagmin IV               | Syt4    | 64440  | 1,07 | up   |
| 5677183 | 7174110 | 1310416 | synaptotagmin IV               | Syt4    | 64440  | 1,23 | up   |
| 5728099 | 7174110 | 1310413 | synaptotagmin IV               | Syt4    | 64440  | 1,08 | down |

|         |         |         |                                                      |        |        |      |      |
|---------|---------|---------|------------------------------------------------------|--------|--------|------|------|
| 5740779 | 7174110 | 1310412 | synaptotagmin IV                                     | Syt4   | 64440  | 1,17 | up   |
| 5769122 | 7174110 | 1310415 | synaptotagmin IV                                     | Syt4   | 64440  | 1,00 | down |
| 6084329 | 7174110 | 1310416 | synaptotagmin IV                                     | Syt4   | 64440  | 2,38 | up   |
| 6434277 | 7174110 | 1310413 | synaptotagmin IV                                     | Syt4   | 64440  | 1,31 | down |
| 6536263 | 7174110 | 1310414 | synaptotagmin IV                                     | Syt4   | 64440  | 1,15 | down |
| 6540850 | 7174110 | 1310414 | synaptotagmin IV                                     | Syt4   | 64440  | 1,02 | down |
| 6706854 | 7174110 | 1310413 | synaptotagmin IV                                     | Syt4   | 64440  | 1,21 | down |
| 5651626 | 7028619 | 957976  | synaptotagmin V                                      | Syt5   | 54309  | 1,51 | up   |
| 5680439 | 7028619 | 957985  | synaptotagmin V                                      | Syt5   | 54309  | 1,17 | up   |
| 5828007 | 7028619 | 957984  | synaptotagmin V                                      | Syt5   | 54309  | 1,02 | down |
| 5966542 | 7028619 | 957978  | synaptotagmin V                                      | Syt5   | 54309  | 1,16 | down |
| 6078128 | 7028619 | 957986  | synaptotagmin V                                      | Syt5   | 54309  | 1,08 | up   |
| 6088580 | 7028619 | 957975  | synaptotagmin V                                      | Syt5   | 54309  | 2,30 | up   |
| 6179968 | 7028619 | 957983  | synaptotagmin V                                      | Syt5   | 54309  | 1,07 | up   |
| 6185886 | 7028619 | 957980  | synaptotagmin V                                      | Syt5   | 54309  | 1,51 | down |
| 6216606 | 7028619 | 957981  | synaptotagmin V                                      | Syt5   | 54309  | 1,14 | up   |
| 6221204 | 7028619 | 957979  | synaptotagmin V                                      | Syt5   | 54309  | 1,14 | down |
| 6291193 | 7028619 | 957977  | synaptotagmin V                                      | Syt5   | 54309  | 1,26 | up   |
| 6341069 | 7028619 | 957985  | synaptotagmin V                                      | Syt5   | 54309  | 1,01 | down |
| 6381624 | 7028619 | 957982  | synaptotagmin V                                      | Syt5   | 54309  | 1,39 | down |
| 5679224 | 7039661 | 984695  | synaptotagmin VII                                    | Syt7   | 59267  | 1,20 | down |
| 5870462 | 7039661 | 984697  | synaptotagmin VII                                    | Syt7   | 59267  | 1,08 | down |
| 5973671 | 7039661 | 984692  | synaptotagmin VII                                    | Syt7   | 59267  | 1,87 | down |
| 5985935 | 7039661 | 984702  | synaptotagmin VII                                    | Syt7   | 59267  | 1,20 | down |
| 6057075 | 7039661 | 984693  | synaptotagmin VII                                    | Syt7   | 59267  | 1,25 | up   |
| 6073392 | 7039661 | 984689  | synaptotagmin VII                                    | Syt7   | 59267  | 1,28 | up   |
| 6077327 | 7039661 | 984694  | synaptotagmin VII                                    | Syt7   | 59267  | 1,20 | up   |
| 6105562 | 7039661 | 984700  | synaptotagmin VII                                    | Syt7   | 59267  | 1,20 | down |
| 6146647 | 7039661 | 984695  | synaptotagmin VII                                    | Syt7   | 59267  | 1,24 | up   |
| 6150026 | 7039661 | 984691  | synaptotagmin VII                                    | Syt7   | 59267  | 1,02 | up   |
| 6184010 | 7039661 | 984695  | synaptotagmin VII                                    | Syt7   | 59267  | 1,25 | up   |
| 6184610 | 7039661 | 984695  | synaptotagmin VII                                    | Syt7   | 59267  | 1,17 | up   |
| 6259652 | 7039661 | 984690  | synaptotagmin VII                                    | Syt7   | 59267  | 1,28 | up   |
| 6286453 | 7039661 | 984698  | synaptotagmin VII                                    | Syt7   | 59267  | 1,03 | down |
| 6431019 | 7039661 | 984688  | synaptotagmin VII                                    | Syt7   | 59267  | 1,43 | up   |
| 6467367 | 7039661 | 984694  | synaptotagmin VII                                    | Syt7   | 59267  | 1,16 | up   |
| 6610804 | 7039661 | 984696  | synaptotagmin VII                                    | Syt7   | 59267  | 1,32 | down |
| 6632111 | 7039661 | 984701  | synaptotagmin VII                                    | Syt7   | 59267  | 1,15 | down |
| 6673640 | 7039661 | 984699  | synaptotagmin VII                                    | Syt7   | 59267  | 1,30 | down |
| 5920219 | 7059567 | 1030507 | synaptotagmin XII                                    | Syt12  | 191595 | 1,06 | up   |
| 6263801 | 7059567 | 1030509 | synaptotagmin XII                                    | Syt12  | 191595 | 1,55 | down |
| 6365718 | 7059567 | 1030504 | synaptotagmin XII                                    | Syt12  | 191595 | 1,02 | up   |
| 6409190 | 7059567 | 1030506 | synaptotagmin XII                                    | Syt12  | 191595 | 1,70 | up   |
| 6608600 | 7059567 | 1030505 | synaptotagmin XII                                    | Syt12  | 191595 | 1,09 | up   |
| 6609250 | 7059567 | 1030503 | synaptotagmin XII                                    | Syt12  | 191595 | 1,77 | down |
| 6680398 | 7059567 | 1030508 | synaptotagmin XII                                    | Syt12  | 191595 | 2,01 | up   |
| 5669540 | 7200490 | 1376783 | synovial sarcoma, X breakpoint 2 interacting protein | Ssx2ip | 308023 | 1,05 | down |
| 5669859 | 7200490 | 1376794 | synovial sarcoma, X breakpoint 2 interacting protein | Ssx2ip | 308023 | 1,36 | down |
| 5712936 | 7200490 | 1376782 | synovial sarcoma, X breakpoint 2 interacting protein | Ssx2ip | 308023 | 1,06 | down |
| 5775794 | 7200490 | 1376783 | synovial sarcoma, X breakpoint 2 interacting protein | Ssx2ip | 308023 | 2,06 | down |
| 5776010 | 7200490 | 1376791 | synovial sarcoma, X breakpoint 2 interacting protein | Ssx2ip | 308023 | 1,03 | up   |
| 5813968 | 7200490 | 1376781 | synovial sarcoma, X breakpoint 2 interacting protein | Ssx2ip | 308023 | 1,36 | down |
| 5852078 | 7200490 | 1376784 | synovial sarcoma, X breakpoint 2 interacting protein | Ssx2ip | 308023 | 1,10 | up   |
| 6029062 | 7200490 | 1376792 | synovial sarcoma, X breakpoint 2 interacting protein | Ssx2ip | 308023 | 1,16 | up   |
| 6063956 | 7200490 | 1376795 | synovial sarcoma, X breakpoint 2 interacting protein | Ssx2ip | 308023 | 1,19 | down |
| 6207039 | 7200490 | 1376790 | synovial sarcoma, X breakpoint 2 interacting protein | Ssx2ip | 308023 | 1,09 | down |

|         |         |         |                                                      |        |        |      |      |
|---------|---------|---------|------------------------------------------------------|--------|--------|------|------|
| 6274741 | 7200490 | 1376788 | synovial sarcoma, X breakpoint 2 interacting protein | Ssx2ip | 308023 | 1,53 | up   |
| 6312023 | 7200490 | 1376782 | synovial sarcoma, X breakpoint 2 interacting protein | Ssx2ip | 308023 | 1,14 | up   |
| 6346129 | 7200490 | 1376785 | synovial sarcoma, X breakpoint 2 interacting protein | Ssx2ip | 308023 | 1,78 | up   |
| 6501200 | 7200490 | 1376786 | synovial sarcoma, X breakpoint 2 interacting protein | Ssx2ip | 308023 | 1,60 | up   |
| 6544616 | 7200490 | 1376787 | synovial sarcoma, X breakpoint 2 interacting protein | Ssx2ip | 308023 | 1,05 | up   |
| 6556347 | 7200490 | 1376789 | synovial sarcoma, X breakpoint 2 interacting protein | Ssx2ip | 308023 | 1,30 | up   |
| 6689546 | 7200490 | 1376794 | synovial sarcoma, X breakpoint 2 interacting protein | Ssx2ip | 308023 | 1,42 | up   |
| 6706113 | 7200490 | 1376793 | synovial sarcoma, X breakpoint 2 interacting protein | Ssx2ip | 308023 | 1,26 | up   |
| 5639440 | 7246570 | 1489214 | syntaphilin                                          | Snph   | 296267 | 1,04 | up   |
| 5711181 | 7246570 | 1489229 | syntaphilin                                          | Snph   | 296267 | 1,04 | down |
| 5720339 | 7246570 | 1489218 | syntaphilin                                          | Snph   | 296267 | 1,12 | up   |
| 5761801 | 7246570 | 1489215 | syntaphilin                                          | Snph   | 296267 | 1,25 | down |
| 5809878 | 7246570 | 1489215 | syntaphilin                                          | Snph   | 296267 | 1,39 | down |
| 5878933 | 7246570 | 1489213 | syntaphilin                                          | Snph   | 296267 | 2,42 | down |
| 6207863 | 7246570 | 1489214 | syntaphilin                                          | Snph   | 296267 | 1,18 | down |
| 6259069 | 7246570 | 1489214 | syntaphilin                                          | Snph   | 296267 | 1,09 | up   |
| 6273404 | 7246570 | 1489230 | syntaphilin                                          | Snph   | 296267 | 1,13 | up   |
| 6364523 | 7246570 | 1489216 | syntaphilin                                          | Snph   | 296267 | 1,10 | up   |
| 6551214 | 7246570 | 1489217 | syntaphilin                                          | Snph   | 296267 | 1,07 | up   |
| 5650293 | 7103490 | 1136342 | syntaxin 1A (brain)                                  | Stx1a  | 116470 | 1,06 | down |
| 5782938 | 7103490 | 1136340 | syntaxin 1A (brain)                                  | Stx1a  | 116470 | 1,31 | up   |
| 5792768 | 7103490 | 1136337 | syntaxin 1A (brain)                                  | Stx1a  | 116470 | 1,07 | down |
| 5900870 | 7103490 | 1136343 | syntaxin 1A (brain)                                  | Stx1a  | 116470 | 1,01 | down |
| 5989906 | 7103490 | 1136344 | syntaxin 1A (brain)                                  | Stx1a  | 116470 | 2,50 | down |
| 6196243 | 7103490 | 1136341 | syntaxin 1A (brain)                                  | Stx1a  | 116470 | 1,36 | up   |
| 6259715 | 7103490 | 1136335 | syntaxin 1A (brain)                                  | Stx1a  | 116470 | 1,10 | down |
| 6290081 | 7103490 | 1136335 | syntaxin 1A (brain)                                  | Stx1a  | 116470 | 1,38 | up   |
| 6392895 | 7103490 | 1136338 | syntaxin 1A (brain)                                  | Stx1a  | 116470 | 1,00 | down |
| 6523065 | 7103490 | 1136339 | syntaxin 1A (brain)                                  | Stx1a  | 116470 | 1,34 | down |
| 6666607 | 7103490 | 1136336 | syntaxin 1A (brain)                                  | Stx1a  | 116470 | 1,19 | up   |
| 5621383 | 7057600 | 1026060 | syntaxin 1B                                          | Stx1b  | 24923  | 1,25 | up   |
| 5658872 | 7057600 | 1026067 | syntaxin 1B                                          | Stx1b  | 24923  | 1,11 | up   |
| 5772719 | 7057600 | 1026071 | syntaxin 1B                                          | Stx1b  | 24923  | 1,18 | down |
| 5806818 | 7057600 | 1026060 | syntaxin 1B                                          | Stx1b  | 24923  | 1,58 | up   |
| 5835572 | 7057600 | 1026058 | syntaxin 1B                                          | Stx1b  | 24923  | 1,02 | up   |
| 6020637 | 7057600 | 1026069 | syntaxin 1B                                          | Stx1b  | 24923  | 1,36 | down |
| 6052904 | 7057600 | 1026068 | syntaxin 1B                                          | Stx1b  | 24923  | 2,08 | down |
| 6328437 | 7057600 | 1026063 | syntaxin 1B                                          | Stx1b  | 24923  | 1,01 | up   |
| 6337824 | 7057600 | 1026061 | syntaxin 1B                                          | Stx1b  | 24923  | 1,62 | down |
| 6394331 | 7057600 | 1026062 | syntaxin 1B                                          | Stx1b  | 24923  | 1,29 | down |
| 6400077 | 7057600 | 1026066 | syntaxin 1B                                          | Stx1b  | 24923  | 1,03 | down |
| 6421194 | 7057600 | 1026059 | syntaxin 1B                                          | Stx1b  | 24923  | 1,22 | up   |
| 6424361 | 7057600 | 1026058 | syntaxin 1B                                          | Stx1b  | 24923  | 1,03 | up   |
| 6476612 | 7057600 | 1026070 | syntaxin 1B                                          | Stx1b  | 24923  | 1,05 | down |
| 6668406 | 7057600 | 1026064 | syntaxin 1B                                          | Stx1b  | 24923  | 1,08 | down |
| 6698824 | 7057600 | 1026065 | syntaxin 1B                                          | Stx1b  | 24923  | 1,01 | up   |
| 5652334 | 7327650 | 1689734 | syntrophin, basic 1                                  | Sntb1  | 299940 | 1,14 | up   |
| 5806279 | 7327650 | 1689684 | syntrophin, basic 1                                  | Sntb1  | 299940 | 2,38 | up   |
| 6047718 | 7327650 | 1689719 | syntrophin, basic 1                                  | Sntb1  | 299940 | 1,01 | down |
| 6253582 | 7327650 | 1689707 | syntrophin, basic 1                                  | Sntb1  | 299940 | 1,13 | down |
| 6271527 | 7327650 | 1689696 | syntrophin, basic 1                                  | Sntb1  | 299940 | 1,22 | down |
| 6279780 | 7327650 | 1689686 | syntrophin, basic 1                                  | Sntb1  | 299940 | 1,29 | down |
| 6573615 | 7327650 | 1689682 | syntrophin, basic 1                                  | Sntb1  | 299940 | 1,22 | up   |
| 6673771 | 7327650 | 1689734 | syntrophin, basic 1                                  | Sntb1  | 299940 | 1,04 | up   |
| 6694033 | 7327650 | 1689734 | syntrophin, basic 1                                  | Sntb1  | 299940 | 1,17 | down |
| 5632498 | 7272110 | 1553051 | syntrophin, gamma 1                                  | Sntg1  | 500394 | 1,01 | up   |

|         |         |         |                                                                                  |       |        |      |      |
|---------|---------|---------|----------------------------------------------------------------------------------|-------|--------|------|------|
| 5641272 | 7272110 | 1553047 | syntrophin, gamma 1                                                              | Sntg1 | 500394 | 1,07 | down |
| 5752533 | 7272110 | 1553084 | syntrophin, gamma 1                                                              | Sntg1 | 500394 | 1,02 | up   |
| 5920232 | 7272110 | 1553051 | syntrophin, gamma 1                                                              | Sntg1 | 500394 | 1,19 | up   |
| 6083973 | 7272110 | 1553058 | syntrophin, gamma 1                                                              | Sntg1 | 500394 | 1,25 | up   |
| 6270383 | 7272110 | 1553057 | syntrophin, gamma 1                                                              | Sntg1 | 500394 | 1,06 | down |
| 6344148 | 7272110 | 1553056 | syntrophin, gamma 1                                                              | Sntg1 | 500394 | 1,13 | down |
| 6398323 | 7272110 | 1553063 | syntrophin, gamma 1                                                              | Sntg1 | 500394 | 1,02 | up   |
| 6530098 | 7272110 | 1553084 | syntrophin, gamma 1                                                              | Sntg1 | 500394 | 1,35 | down |
| 6547094 | 7272110 | 1553059 | syntrophin, gamma 1                                                              | Sntg1 | 500394 | 1,18 | down |
| 6711022 | 7272110 | 1553084 | syntrophin, gamma 1                                                              | Sntg1 | 500394 | 1,24 | down |
| 5713029 | 7199454 | 1374487 | tachykinin receptor 3                                                            | Tacr3 | 24808  | 1,03 | up   |
| 5737986 | 7199454 | 1374488 | tachykinin receptor 3                                                            | Tacr3 | 24808  | 1,46 | down |
| 5765619 | 7199454 | 1374486 | tachykinin receptor 3                                                            | Tacr3 | 24808  | 1,00 | up   |
| 5882244 | 7199454 | 1374487 | tachykinin receptor 3                                                            | Tacr3 | 24808  | 1,12 | down |
| 6002131 | 7199454 | 1374483 | tachykinin receptor 3                                                            | Tacr3 | 24808  | 1,10 | down |
| 6219725 | 7199454 | 1374484 | tachykinin receptor 3                                                            | Tacr3 | 24808  | 1,41 | up   |
| 6302395 | 7199454 | 1374484 | tachykinin receptor 3                                                            | Tacr3 | 24808  | 2,14 | down |
| 6405506 | 7199454 | 1374485 | tachykinin receptor 3                                                            | Tacr3 | 24808  | 1,60 | up   |
| 6742113 | 7199454 | 1374483 | tachykinin receptor 3                                                            | Tacr3 | 24808  | 1,20 | down |
| 5642695 | 7070461 | 1057364 | TAF15 RNA polymerase II, TATA box binding protein (TBP)-associated factor        | Taf15 | 287571 | 1,03 | up   |
| 5688977 | 7070461 | 1057365 | TAF15 RNA polymerase II, TATA box binding protein (TBP)-associated factor        | Taf15 | 287571 | 1,29 | up   |
| 5807497 | 7070461 | 1057373 | TAF15 RNA polymerase II, TATA box binding protein (TBP)-associated factor        | Taf15 | 287571 | 1,16 | down |
| 5827714 | 7070461 | 1057361 | TAF15 RNA polymerase II, TATA box binding protein (TBP)-associated factor        | Taf15 | 287571 | 1,32 | up   |
| 5889768 | 7070461 | 1057379 | TAF15 RNA polymerase II, TATA box binding protein (TBP)-associated factor        | Taf15 | 287571 | 2,35 | down |
| 6094413 | 7070461 | 1057368 | TAF15 RNA polymerase II, TATA box binding protein (TBP)-associated factor        | Taf15 | 287571 | 1,14 | down |
| 6101128 | 7070461 | 1057379 | TAF15 RNA polymerase II, TATA box binding protein (TBP)-associated factor        | Taf15 | 287571 | 1,46 | down |
| 6153527 | 7070461 | 1057371 | TAF15 RNA polymerase II, TATA box binding protein (TBP)-associated factor        | Taf15 | 287571 | 1,27 | up   |
| 6223920 | 7070461 | 1057375 | TAF15 RNA polymerase II, TATA box binding protein (TBP)-associated factor        | Taf15 | 287571 | 1,26 | down |
| 6267226 | 7070461 | 1057363 | TAF15 RNA polymerase II, TATA box binding protein (TBP)-associated factor        | Taf15 | 287571 | 1,13 | up   |
| 6298027 | 7070461 | 1057378 | TAF15 RNA polymerase II, TATA box binding protein (TBP)-associated factor        | Taf15 | 287571 | 1,30 | down |
| 6369883 | 7070461 | 1057374 | TAF15 RNA polymerase II, TATA box binding protein (TBP)-associated factor        | Taf15 | 287571 | 1,41 | up   |
| 6400422 | 7070461 | 1057370 | TAF15 RNA polymerase II, TATA box binding protein (TBP)-associated factor        | Taf15 | 287571 | 1,14 | up   |
| 6630090 | 7070461 | 1057376 | TAF15 RNA polymerase II, TATA box binding protein (TBP)-associated factor        | Taf15 | 287571 | 1,24 | down |
| 6687688 | 7070461 | 1057367 | TAF15 RNA polymerase II, TATA box binding protein (TBP)-associated factor        | Taf15 | 287571 | 1,31 | up   |
| 6723004 | 7070461 | 1057366 | TAF15 RNA polymerase II, TATA box binding protein (TBP)-associated factor        | Taf15 | 287571 | 1,22 | up   |
| 6728988 | 7070461 | 1057372 | TAF15 RNA polymerase II, TATA box binding protein (TBP)-associated factor        | Taf15 | 287571 | 1,15 | down |
| 5713860 | 7100976 | 1129883 | TAF6 RNA polymerase II, TATA box binding protein (TBP)-associated factor         | Taf6  | 288533 | 1,20 | down |
| 5766096 | 7100976 | 1129881 | TAF6 RNA polymerase II, TATA box binding protein (TBP)-associated factor         | Taf6  | 288533 | 1,04 | up   |
| 5806830 | 7100976 | 1129872 | TAF6 RNA polymerase II, TATA box binding protein (TBP)-associated factor         | Taf6  | 288533 | 1,61 | down |
| 5891659 | 7100976 | 1129877 | TAF6 RNA polymerase II, TATA box binding protein (TBP)-associated factor         | Taf6  | 288533 | 1,12 | up   |
| 5926718 | 7100976 | 1129884 | TAF6 RNA polymerase II, TATA box binding protein (TBP)-associated factor         | Taf6  | 288533 | 1,20 | up   |
| 6005487 | 7100976 | 1129872 | TAF6 RNA polymerase II, TATA box binding protein (TBP)-associated factor         | Taf6  | 288533 | 1,12 | up   |
| 6022033 | 7100976 | 1129874 | TAF6 RNA polymerase II, TATA box binding protein (TBP)-associated factor         | Taf6  | 288533 | 1,08 | down |
| 6043381 | 7100976 | 1129880 | TAF6 RNA polymerase II, TATA box binding protein (TBP)-associated factor         | Taf6  | 288533 | 2,28 | down |
| 6057949 | 7100976 | 1129873 | TAF6 RNA polymerase II, TATA box binding protein (TBP)-associated factor         | Taf6  | 288533 | 1,19 | up   |
| 6092783 | 7100976 | 1129876 | TAF6 RNA polymerase II, TATA box binding protein (TBP)-associated factor         | Taf6  | 288533 | 1,01 | up   |
| 6204750 | 7100976 | 1129885 | TAF6 RNA polymerase II, TATA box binding protein (TBP)-associated factor         | Taf6  | 288533 | 1,10 | up   |
| 6356235 | 7100976 | 1129872 | TAF6 RNA polymerase II, TATA box binding protein (TBP)-associated factor         | Taf6  | 288533 | 1,35 | up   |
| 6383876 | 7100976 | 1129878 | TAF6 RNA polymerase II, TATA box binding protein (TBP)-associated factor         | Taf6  | 288533 | 1,31 | down |
| 6398545 | 7100976 | 1129882 | TAF6 RNA polymerase II, TATA box binding protein (TBP)-associated factor         | Taf6  | 288533 | 1,38 | up   |
| 6408814 | 7100976 | 1129879 | TAF6 RNA polymerase II, TATA box binding protein (TBP)-associated factor         | Taf6  | 288533 | 1,17 | down |
| 6418470 | 7100976 | 1129875 | TAF6 RNA polymerase II, TATA box binding protein (TBP)-associated factor         | Taf6  | 288533 | 1,08 | down |
| 6636673 | 7100976 | 1129885 | TAF6 RNA polymerase II, TATA box binding protein (TBP)-associated factor         | Taf6  | 288533 | 1,01 | down |
| 5679554 | 7060195 | 1031963 | TAF6-like RNA polymerase II, p300/CBP-associated factor (PCAF)-associated factor | Taf6l | 309194 | 1,04 | down |
| 5815983 | 7060195 | 1031971 | TAF6-like RNA polymerase II, p300/CBP-associated factor (PCAF)-associated factor | Taf6l | 309194 | 1,20 | up   |
| 5834253 | 7060195 | 1031964 | TAF6-like RNA polymerase II, p300/CBP-associated factor (PCAF)-associated factor | Taf6l | 309194 | 1,27 | up   |

|         |         |         |                                                                               |       |        |      |      |
|---------|---------|---------|-------------------------------------------------------------------------------|-------|--------|------|------|
| 5850082 | 7060195 | 1031962 | TAF6-like RNA polymerase II, p300/CBP-associated factor (PCAF)-associated fac | Taf6l | 309194 | 1,45 | down |
| 5955868 | 7060195 | 1031961 | TAF6-like RNA polymerase II, p300/CBP-associated factor (PCAF)-associated fac | Taf6l | 309194 | 1,46 | down |
| 5976992 | 7060195 | 1031974 | TAF6-like RNA polymerase II, p300/CBP-associated factor (PCAF)-associated fac | Taf6l | 309194 | 1,48 | down |
| 6052676 | 7060195 | 1031965 | TAF6-like RNA polymerase II, p300/CBP-associated factor (PCAF)-associated fac | Taf6l | 309194 | 1,42 | down |
| 6142287 | 7060195 | 1031961 | TAF6-like RNA polymerase II, p300/CBP-associated factor (PCAF)-associated fac | Taf6l | 309194 | 1,05 | down |
| 6240223 | 7060195 | 1031968 | TAF6-like RNA polymerase II, p300/CBP-associated factor (PCAF)-associated fac | Taf6l | 309194 | 1,33 | up   |
| 6267510 | 7060195 | 1031969 | TAF6-like RNA polymerase II, p300/CBP-associated factor (PCAF)-associated fac | Taf6l | 309194 | 1,13 | up   |
| 6369199 | 7060195 | 1031970 | TAF6-like RNA polymerase II, p300/CBP-associated factor (PCAF)-associated fac | Taf6l | 309194 | 1,23 | up   |
| 6456227 | 7060195 | 1031967 | TAF6-like RNA polymerase II, p300/CBP-associated factor (PCAF)-associated fac | Taf6l | 309194 | 2,77 | up   |
| 6538554 | 7060195 | 1031966 | TAF6-like RNA polymerase II, p300/CBP-associated factor (PCAF)-associated fac | Taf6l | 309194 | 1,17 | up   |
| 6708918 | 7060195 | 1031961 | TAF6-like RNA polymerase II, p300/CBP-associated factor (PCAF)-associated fac | Taf6l | 309194 | 1,58 | down |
| 5856084 | 7188899 | 1346781 | TAF9 RNA polymerase II, TATA box binding protein (TBP)-associated factor      | Taf9  | 373541 | 1,13 | up   |
| 5864738 | 7188899 | 1346783 | TAF9 RNA polymerase II, TATA box binding protein (TBP)-associated factor      | Taf9  | 373541 | 1,05 | up   |
| 6052712 | 7188899 | 1346783 | TAF9 RNA polymerase II, TATA box binding protein (TBP)-associated factor      | Taf9  | 373541 | 2,33 | down |
| 6284653 | 7188899 | 1346783 | TAF9 RNA polymerase II, TATA box binding protein (TBP)-associated factor      | Taf9  | 373541 | 1,19 | down |
| 6289380 | 7188899 | 1346784 | TAF9 RNA polymerase II, TATA box binding protein (TBP)-associated factor      | Taf9  | 373541 | 1,13 | down |
| 6379047 | 7188899 | 1346787 | TAF9 RNA polymerase II, TATA box binding protein (TBP)-associated factor      | Taf9  | 373541 | 1,87 | up   |
| 6457270 | 7188899 | 1346783 | TAF9 RNA polymerase II, TATA box binding protein (TBP)-associated factor      | Taf9  | 373541 | 1,32 | up   |
| 6528414 | 7188899 | 1346785 | TAF9 RNA polymerase II, TATA box binding protein (TBP)-associated factor      | Taf9  | 373541 | 1,10 | down |
| 6586672 | 7188899 | 1346782 | TAF9 RNA polymerase II, TATA box binding protein (TBP)-associated factor      | Taf9  | 373541 | 1,03 | down |
| 6698516 | 7188899 | 1346786 | TAF9 RNA polymerase II, TATA box binding protein (TBP)-associated factor      | Taf9  | 373541 | 1,12 | up   |
| 5631388 | 7146245 | 1241376 | tankyrase, TRF1-interacting ankyrin-related ADP-ribose polymerase             | Tnks  | 290794 | 1,20 | up   |
| 5632161 | 7146245 | 1241337 | tankyrase, TRF1-interacting ankyrin-related ADP-ribose polymerase             | Tnks  | 290794 | 2,27 | down |
| 5636915 | 7146245 | 1241360 | tankyrase, TRF1-interacting ankyrin-related ADP-ribose polymerase             | Tnks  | 290794 | 1,05 | down |
| 5647188 | 7146245 | 1241341 | tankyrase, TRF1-interacting ankyrin-related ADP-ribose polymerase             | Tnks  | 290794 | 1,06 | up   |
| 5735660 | 7146245 | 1241357 | tankyrase, TRF1-interacting ankyrin-related ADP-ribose polymerase             | Tnks  | 290794 | 1,24 | up   |
| 5763022 | 7146245 | 1241337 | tankyrase, TRF1-interacting ankyrin-related ADP-ribose polymerase             | Tnks  | 290794 | 1,04 | up   |
| 5767210 | 7146245 | 1241366 | tankyrase, TRF1-interacting ankyrin-related ADP-ribose polymerase             | Tnks  | 290794 | 1,07 | down |
| 5809916 | 7146245 | 1241348 | tankyrase, TRF1-interacting ankyrin-related ADP-ribose polymerase             | Tnks  | 290794 | 1,41 | down |
| 5847473 | 7146245 | 1241371 | tankyrase, TRF1-interacting ankyrin-related ADP-ribose polymerase             | Tnks  | 290794 | 1,33 | up   |
| 5855453 | 7146245 | 1241365 | tankyrase, TRF1-interacting ankyrin-related ADP-ribose polymerase             | Tnks  | 290794 | 1,10 | down |
| 5870040 | 7146245 | 1241369 | tankyrase, TRF1-interacting ankyrin-related ADP-ribose polymerase             | Tnks  | 290794 | 1,07 | down |
| 5874519 | 7146245 | 1241372 | tankyrase, TRF1-interacting ankyrin-related ADP-ribose polymerase             | Tnks  | 290794 | 1,03 | up   |
| 5883608 | 7146245 | 1241354 | tankyrase, TRF1-interacting ankyrin-related ADP-ribose polymerase             | Tnks  | 290794 | 1,15 | up   |
| 6029628 | 7146245 | 1241337 | tankyrase, TRF1-interacting ankyrin-related ADP-ribose polymerase             | Tnks  | 290794 | 1,15 | up   |
| 6053305 | 7146245 | 1241364 | tankyrase, TRF1-interacting ankyrin-related ADP-ribose polymerase             | Tnks  | 290794 | 1,00 | down |
| 6060382 | 7146245 | 1241367 | tankyrase, TRF1-interacting ankyrin-related ADP-ribose polymerase             | Tnks  | 290794 | 1,23 | up   |
| 6180088 | 7146245 | 1241375 | tankyrase, TRF1-interacting ankyrin-related ADP-ribose polymerase             | Tnks  | 290794 | 1,24 | up   |
| 6255803 | 7146245 | 1241355 | tankyrase, TRF1-interacting ankyrin-related ADP-ribose polymerase             | Tnks  | 290794 | 1,08 | down |
| 6352863 | 7146245 | 1241349 | tankyrase, TRF1-interacting ankyrin-related ADP-ribose polymerase             | Tnks  | 290794 | 1,17 | down |
| 6360698 | 7146245 | 1241361 | tankyrase, TRF1-interacting ankyrin-related ADP-ribose polymerase             | Tnks  | 290794 | 1,15 | up   |
| 6457849 | 7146245 | 1241370 | tankyrase, TRF1-interacting ankyrin-related ADP-ribose polymerase             | Tnks  | 290794 | 1,10 | up   |
| 6556964 | 7146245 | 1241353 | tankyrase, TRF1-interacting ankyrin-related ADP-ribose polymerase             | Tnks  | 290794 | 1,12 | up   |
| 6577335 | 7146245 | 1241343 | tankyrase, TRF1-interacting ankyrin-related ADP-ribose polymerase             | Tnks  | 290794 | 1,00 | down |
| 6580025 | 7146245 | 1241338 | tankyrase, TRF1-interacting ankyrin-related ADP-ribose polymerase             | Tnks  | 290794 | 1,10 | up   |
| 6587068 | 7146245 | 1241359 | tankyrase, TRF1-interacting ankyrin-related ADP-ribose polymerase             | Tnks  | 290794 | 1,18 | up   |
| 6680137 | 7146245 | 1241363 | tankyrase, TRF1-interacting ankyrin-related ADP-ribose polymerase             | Tnks  | 290794 | 1,15 | up   |
| 6687546 | 7146245 | 1241368 | tankyrase, TRF1-interacting ankyrin-related ADP-ribose polymerase             | Tnks  | 290794 | 1,26 | up   |
| 6688229 | 7146245 | 1241358 | tankyrase, TRF1-interacting ankyrin-related ADP-ribose polymerase             | Tnks  | 290794 | 1,01 | up   |
| 6724457 | 7146245 | 1241341 | tankyrase, TRF1-interacting ankyrin-related ADP-ribose polymerase             | Tnks  | 290794 | 1,12 | up   |
| 6733512 | 7146245 | 1241356 | tankyrase, TRF1-interacting ankyrin-related ADP-ribose polymerase             | Tnks  | 290794 | 1,21 | down |
| 5650489 | 7057365 | 1025710 | TAO kinase 2                                                                  | Taok2 | 64666  | 1,11 | up   |
| 5675421 | 7057365 | 1025701 | TAO kinase 2                                                                  | Taok2 | 64666  | 1,29 | up   |
| 5683009 | 7057365 | 1025696 | TAO kinase 2                                                                  | Taok2 | 64666  | 1,04 | down |
| 5703558 | 7057365 | 1025696 | TAO kinase 2                                                                  | Taok2 | 64666  | 1,10 | down |
| 5717104 | 7057365 | 1025700 | TAO kinase 2                                                                  | Taok2 | 64666  | 1,16 | up   |



|         |         |         |                                  |        |        |      |      |
|---------|---------|---------|----------------------------------|--------|--------|------|------|
| 5819985 | 7057365 | 1025699 | TAO kinase 2                     | Taok2  | 64666  | 1,01 | up   |
| 5839017 | 7057365 | 1025710 | TAO kinase 2                     | Taok2  | 64666  | 2,09 | up   |
| 5885815 | 7057365 | 1025696 | TAO kinase 2                     | Taok2  | 64666  | 1,13 | up   |
| 5951514 | 7057365 | 1025696 | TAO kinase 2                     | Taok2  | 64666  | 1,04 | up   |
| 6024406 | 7057365 | 1025705 | TAO kinase 2                     | Taok2  | 64666  | 1,34 | down |
| 6026280 | 7057365 | 1025706 | TAO kinase 2                     | Taok2  | 64666  | 1,06 | down |
| 6096832 | 7057365 | 1025696 | TAO kinase 2                     | Taok2  | 64666  | 1,00 | up   |
| 6143908 | 7057365 | 1025704 | TAO kinase 2                     | Taok2  | 64666  | 1,16 | down |
| 6153709 | 7057365 | 1025708 | TAO kinase 2                     | Taok2  | 64666  | 1,03 | down |
| 6197038 | 7057365 | 1025696 | TAO kinase 2                     | Taok2  | 64666  | 2,51 | down |
| 6234653 | 7057365 | 1025709 | TAO kinase 2                     | Taok2  | 64666  | 1,06 | down |
| 6262324 | 7057365 | 1025707 | TAO kinase 2                     | Taok2  | 64666  | 1,05 | down |
| 6292712 | 7057365 | 1025698 | TAO kinase 2                     | Taok2  | 64666  | 1,14 | up   |
| 6364543 | 7057365 | 1025702 | TAO kinase 2                     | Taok2  | 64666  | 1,09 | up   |
| 6426183 | 7057365 | 1025696 | TAO kinase 2                     | Taok2  | 64666  | 1,10 | up   |
| 6436259 | 7057365 | 1025696 | TAO kinase 2                     | Taok2  | 64666  | 1,11 | down |
| 6452384 | 7057365 | 1025700 | TAO kinase 2                     | Taok2  | 64666  | 1,05 | up   |
| 6496229 | 7057365 | 1025703 | TAO kinase 2                     | Taok2  | 64666  | 1,15 | down |
| 6507826 | 7057365 | 1025696 | TAO kinase 2                     | Taok2  | 64666  | 1,22 | up   |
| 6520033 | 7057365 | 1025696 | TAO kinase 2                     | Taok2  | 64666  | 1,13 | down |
| 6585674 | 7057365 | 1025711 | TAO kinase 2                     | Taok2  | 64666  | 1,19 | down |
| 6608256 | 7057365 | 1025700 | TAO kinase 2                     | Taok2  | 64666  | 1,00 | down |
| 6684516 | 7057365 | 1025697 | TAO kinase 2                     | Taok2  | 64666  | 1,08 | down |
| 6701597 | 7057365 | 1025696 | TAO kinase 2                     | Taok2  | 64666  | 1,18 | down |
| 5706447 | 7269637 | 1546241 | TAP binding protein-like         | Tapbpl | 297602 | 1,62 | up   |
| 5969037 | 7269637 | 1546244 | TAP binding protein-like         | Tapbpl | 297602 | 4,89 | down |
| 6291763 | 7269637 | 1546238 | TAP binding protein-like         | Tapbpl | 297602 | 1,89 | up   |
| 6396412 | 7269637 | 1546240 | TAP binding protein-like         | Tapbpl | 297602 | 1,82 | up   |
| 6500547 | 7269637 | 1546244 | TAP binding protein-like         | Tapbpl | 297602 | 2,47 | down |
| 6538593 | 7269637 | 1546237 | TAP binding protein-like         | Tapbpl | 297602 | 1,01 | up   |
| 6598106 | 7269637 | 1546239 | TAP binding protein-like         | Tapbpl | 297602 | 1,19 | up   |
| 6627381 | 7269637 | 1546242 | TAP binding protein-like         | Tapbpl | 297602 | 1,96 | up   |
| 6638851 | 7269637 | 1546237 | TAP binding protein-like         | Tapbpl | 297602 | 1,72 | up   |
| 6738829 | 7269637 | 1546244 | TAP binding protein-like         | Tapbpl | 297602 | 2,41 | down |
| 5626121 | 7293076 | 1603970 | TAR DNA binding protein          | Tardbp | 298648 | 1,02 | down |
| 5702718 | 7293076 | 1603971 | TAR DNA binding protein          | Tardbp | 298648 | 1,06 | up   |
| 5846319 | 7293076 | 1603969 | TAR DNA binding protein          | Tardbp | 298648 | 1,04 | down |
| 5862358 | 7293076 | 1603975 | TAR DNA binding protein          | Tardbp | 298648 | 1,06 | up   |
| 6082906 | 7293076 | 1603969 | TAR DNA binding protein          | Tardbp | 298648 | 1,14 | down |
| 6296518 | 7293076 | 1603968 | TAR DNA binding protein          | Tardbp | 298648 | 1,18 | up   |
| 6349350 | 7293076 | 1603973 | TAR DNA binding protein          | Tardbp | 298648 | 1,09 | down |
| 6486948 | 7293076 | 1603971 | TAR DNA binding protein          | Tardbp | 298648 | 1,04 | down |
| 6489853 | 7293076 | 1603974 | TAR DNA binding protein          | Tardbp | 298648 | 1,07 | up   |
| 6544143 | 7293076 | 1603974 | TAR DNA binding protein          | Tardbp | 298648 | 1,07 | up   |
| 6618842 | 7293076 | 1603970 | TAR DNA binding protein          | Tardbp | 298648 | 1,11 | down |
| 6643923 | 7293076 | 1603969 | TAR DNA binding protein          | Tardbp | 298648 | 2,21 | down |
| 6708526 | 7293076 | 1603972 | TAR DNA binding protein          | Tardbp | 298648 | 1,10 | up   |
| 5855367 | 7293454 | 1604952 | taste receptor, type 1, member 1 | Tas1r1 | 29407  | 2,11 | down |
| 5856085 | 7293454 | 1604953 | taste receptor, type 1, member 1 | Tas1r1 | 29407  | 2,01 | down |
| 5857903 | 7293454 | 1604948 | taste receptor, type 1, member 1 | Tas1r1 | 29407  | 1,14 | up   |
| 6062479 | 7293454 | 1604956 | taste receptor, type 1, member 1 | Tas1r1 | 29407  | 1,03 | down |
| 6081991 | 7293454 | 1604949 | taste receptor, type 1, member 1 | Tas1r1 | 29407  | 1,17 | down |
| 6287149 | 7293454 | 1604954 | taste receptor, type 1, member 1 | Tas1r1 | 29407  | 1,15 | up   |
| 6308037 | 7293454 | 1604949 | taste receptor, type 1, member 1 | Tas1r1 | 29407  | 1,15 | up   |
| 6387923 | 7293454 | 1604955 | taste receptor, type 1, member 1 | Tas1r1 | 29407  | 1,14 | down |
| 6561276 | 7293454 | 1604956 | taste receptor, type 1, member 1 | Tas1r1 | 29407  | 1,03 | up   |

|         |         |         |                                                                              |         |        |      |      |
|---------|---------|---------|------------------------------------------------------------------------------|---------|--------|------|------|
| 6584132 | 7293454 | 1604948 | taste receptor, type 1, member 1                                             | Tas1r1  | 29407  | 1,29 | up   |
| 6584291 | 7293454 | 1604949 | taste receptor, type 1, member 1                                             | Tas1r1  | 29407  | 1,20 | up   |
| 5621275 | 7186130 | 1340566 | TATA box binding protein (Tbp)-associated factor, RNA polymerase I, C        | Taf1c   | 361420 | 1,21 | up   |
| 5621591 | 7186130 | 1340570 | TATA box binding protein (Tbp)-associated factor, RNA polymerase I, C        | Taf1c   | 361420 | 1,62 | up   |
| 5624083 | 7186130 | 1340564 | TATA box binding protein (Tbp)-associated factor, RNA polymerase I, C        | Taf1c   | 361420 | 1,13 | down |
| 5635014 | 7186130 | 1340573 | TATA box binding protein (Tbp)-associated factor, RNA polymerase I, C        | Taf1c   | 361420 | 1,03 | up   |
| 5637228 | 7186130 | 1340562 | TATA box binding protein (Tbp)-associated factor, RNA polymerase I, C        | Taf1c   | 361420 | 1,33 | up   |
| 5672705 | 7186130 | 1340573 | TATA box binding protein (Tbp)-associated factor, RNA polymerase I, C        | Taf1c   | 361420 | 2,70 | down |
| 5715079 | 7186130 | 1340560 | TATA box binding protein (Tbp)-associated factor, RNA polymerase I, C        | Taf1c   | 361420 | 1,03 | down |
| 5730583 | 7186130 | 1340560 | TATA box binding protein (Tbp)-associated factor, RNA polymerase I, C        | Taf1c   | 361420 | 1,15 | up   |
| 5748965 | 7186130 | 1340571 | TATA box binding protein (Tbp)-associated factor, RNA polymerase I, C        | Taf1c   | 361420 | 1,06 | down |
| 5867054 | 7186130 | 1340566 | TATA box binding protein (Tbp)-associated factor, RNA polymerase I, C        | Taf1c   | 361420 | 1,03 | up   |
| 5899547 | 7186130 | 1340560 | TATA box binding protein (Tbp)-associated factor, RNA polymerase I, C        | Taf1c   | 361420 | 1,10 | up   |
| 5982239 | 7186130 | 1340572 | TATA box binding protein (Tbp)-associated factor, RNA polymerase I, C        | Taf1c   | 361420 | 1,85 | up   |
| 5983443 | 7186130 | 1340573 | TATA box binding protein (Tbp)-associated factor, RNA polymerase I, C        | Taf1c   | 361420 | 1,28 | down |
| 6059625 | 7186130 | 1340565 | TATA box binding protein (Tbp)-associated factor, RNA polymerase I, C        | Taf1c   | 361420 | 1,32 | up   |
| 6122704 | 7186130 | 1340563 | TATA box binding protein (Tbp)-associated factor, RNA polymerase I, C        | Taf1c   | 361420 | 1,05 | down |
| 6364848 | 7186130 | 1340561 | TATA box binding protein (Tbp)-associated factor, RNA polymerase I, C        | Taf1c   | 361420 | 1,20 | down |
| 6379763 | 7186130 | 1340563 | TATA box binding protein (Tbp)-associated factor, RNA polymerase I, C        | Taf1c   | 361420 | 1,12 | down |
| 6479137 | 7186130 | 1340569 | TATA box binding protein (Tbp)-associated factor, RNA polymerase I, C        | Taf1c   | 361420 | 1,03 | up   |
| 6558739 | 7186130 | 1340567 | TATA box binding protein (Tbp)-associated factor, RNA polymerase I, C        | Taf1c   | 361420 | 1,19 | up   |
| 6565535 | 7186130 | 1340568 | TATA box binding protein (Tbp)-associated factor, RNA polymerase I, C        | Taf1c   | 361420 | 1,58 | up   |
| 6585256 | 7186130 | 1340559 | TATA box binding protein (Tbp)-associated factor, RNA polymerase I, C        | Taf1c   | 361420 | 1,48 | down |
| 5676762 | 7333111 | 1702858 | TATA box binding protein (TBP)-associated factor, RNA polymerase I, D, 41kDa | Taf1d   | 363017 | 1,09 | down |
| 5787954 | 7333111 | 1702858 | TATA box binding protein (TBP)-associated factor, RNA polymerase I, D, 41kDa | Taf1d   | 363017 | 1,37 | up   |
| 5886411 | 7333111 | 1702862 | TATA box binding protein (TBP)-associated factor, RNA polymerase I, D, 41kDa | Taf1d   | 363017 | 2,20 | down |
| 5932399 | 7333111 | 1702855 | TATA box binding protein (TBP)-associated factor, RNA polymerase I, D, 41kDa | Taf1d   | 363017 | 1,39 | up   |
| 6076539 | 7333111 | 1702861 | TATA box binding protein (TBP)-associated factor, RNA polymerase I, D, 41kDa | Taf1d   | 363017 | 1,38 | down |
| 6088885 | 7333111 | 1702859 | TATA box binding protein (TBP)-associated factor, RNA polymerase I, D, 41kDa | Taf1d   | 363017 | 1,05 | up   |
| 6128057 | 7333111 | 1702856 | TATA box binding protein (TBP)-associated factor, RNA polymerase I, D, 41kDa | Taf1d   | 363017 | 1,09 | down |
| 6216929 | 7333111 | 1702860 | TATA box binding protein (TBP)-associated factor, RNA polymerase I, D, 41kDa | Taf1d   | 363017 | 1,50 | up   |
| 6240958 | 7333111 | 1702854 | TATA box binding protein (TBP)-associated factor, RNA polymerase I, D, 41kDa | Taf1d   | 363017 | 1,30 | up   |
| 6275679 | 7333111 | 1702853 | TATA box binding protein (TBP)-associated factor, RNA polymerase I, D, 41kDa | Taf1d   | 363017 | 1,37 | up   |
| 6283230 | 7333111 | 1702857 | TATA box binding protein (TBP)-associated factor, RNA polymerase I, D, 41kDa | Taf1d   | 363017 | 1,23 | up   |
| 6283975 | 7333111 | 1702863 | TATA box binding protein (TBP)-associated factor, RNA polymerase I, D, 41kDa | Taf1d   | 363017 | 1,19 | down |
| 5779793 | 7236597 | 1464775 | TATA box binding protein-like 2                                              | Tbpl2   | 680050 | 2,18 | down |
| 5833241 | 7236597 | 1464777 | TATA box binding protein-like 2                                              | Tbpl2   | 680050 | 1,23 | up   |
| 5977394 | 7236597 | 1464780 | TATA box binding protein-like 2                                              | Tbpl2   | 680050 | 1,01 | up   |
| 6271804 | 7236597 | 1464778 | TATA box binding protein-like 2                                              | Tbpl2   | 680050 | 1,05 | down |
| 6548411 | 7236597 | 1464774 | TATA box binding protein-like 2                                              | Tbpl2   | 680050 | 1,05 | up   |
| 6577040 | 7236597 | 1464779 | TATA box binding protein-like 2                                              | Tbpl2   | 680050 | 1,00 | up   |
| 6687201 | 7236597 | 1464781 | TATA box binding protein-like 2                                              | Tbpl2   | 680050 | 1,47 | down |
| 6708513 | 7236597 | 1464775 | TATA box binding protein-like 2                                              | Tbpl2   | 680050 | 1,78 | down |
| 6720502 | 7236597 | 1464780 | TATA box binding protein-like 2                                              | Tbpl2   | 680050 | 1,39 | up   |
| 5661115 | 7371253 | 1799592 | TBC1 domain family, member 16                                                | Tbc1d16 | 303734 | 2,37 | down |
| 5696430 | 7371253 | 1799570 | TBC1 domain family, member 16                                                | Tbc1d16 | 303734 | 1,09 | up   |
| 5751721 | 7371253 | 1799568 | TBC1 domain family, member 16                                                | Tbc1d16 | 303734 | 1,19 | down |
| 5831074 | 7371253 | 1799574 | TBC1 domain family, member 16                                                | Tbc1d16 | 303734 | 1,28 | down |
| 5893527 | 7371253 | 1799594 | TBC1 domain family, member 16                                                | Tbc1d16 | 303734 | 1,10 | up   |
| 5923786 | 7371253 | 1799567 | TBC1 domain family, member 16                                                | Tbc1d16 | 303734 | 1,26 | up   |
| 5934100 | 7371253 | 1799572 | TBC1 domain family, member 16                                                | Tbc1d16 | 303734 | 1,09 | down |
| 6228417 | 7371253 | 1799593 | TBC1 domain family, member 16                                                | Tbc1d16 | 303734 | 1,03 | up   |
| 6330199 | 7371253 | 1799575 | TBC1 domain family, member 16                                                | Tbc1d16 | 303734 | 1,47 | down |
| 6419400 | 7371253 | 1799562 | TBC1 domain family, member 16                                                | Tbc1d16 | 303734 | 1,56 | down |
| 6452059 | 7371253 | 1799564 | TBC1 domain family, member 16                                                | Tbc1d16 | 303734 | 1,55 | up   |
| 6587670 | 7371253 | 1799571 | TBC1 domain family, member 16                                                | Tbc1d16 | 303734 | 1,13 | down |

|         |         |         |                               |         |        |      |      |
|---------|---------|---------|-------------------------------|---------|--------|------|------|
| 5701241 | 7050726 | 1011267 | TBC1 domain family, member 17 | Tbc1d17 | 292886 | 1,13 | up   |
| 5811007 | 7050726 | 1011257 | TBC1 domain family, member 17 | Tbc1d17 | 292886 | 2,07 | down |
| 5887629 | 7050726 | 1011263 | TBC1 domain family, member 17 | Tbc1d17 | 292886 | 1,12 | down |
| 5895747 | 7050726 | 1011256 | TBC1 domain family, member 17 | Tbc1d17 | 292886 | 1,22 | up   |
| 5935318 | 7050726 | 1011261 | TBC1 domain family, member 17 | Tbc1d17 | 292886 | 1,04 | down |
| 6122848 | 7050726 | 1011269 | TBC1 domain family, member 17 | Tbc1d17 | 292886 | 1,07 | down |
| 6179805 | 7050726 | 1011259 | TBC1 domain family, member 17 | Tbc1d17 | 292886 | 1,11 | down |
| 6180331 | 7050726 | 1011258 | TBC1 domain family, member 17 | Tbc1d17 | 292886 | 1,10 | up   |
| 6217171 | 7050726 | 1011260 | TBC1 domain family, member 17 | Tbc1d17 | 292886 | 1,59 | down |
| 6323323 | 7050726 | 1011258 | TBC1 domain family, member 17 | Tbc1d17 | 292886 | 1,00 | down |
| 6360886 | 7050726 | 1011262 | TBC1 domain family, member 17 | Tbc1d17 | 292886 | 1,02 | down |
| 6364597 | 7050726 | 1011266 | TBC1 domain family, member 17 | Tbc1d17 | 292886 | 1,14 | up   |
| 6393011 | 7050726 | 1011265 | TBC1 domain family, member 17 | Tbc1d17 | 292886 | 1,17 | up   |
| 6467220 | 7050726 | 1011268 | TBC1 domain family, member 17 | Tbc1d17 | 292886 | 1,27 | up   |
| 6706738 | 7050726 | 1011264 | TBC1 domain family, member 17 | Tbc1d17 | 292886 | 1,36 | down |
| 6721723 | 7050726 | 1011260 | TBC1 domain family, member 17 | Tbc1d17 | 292886 | 1,14 | down |
| 6743882 | 7050726 | 1011255 | TBC1 domain family, member 17 | Tbc1d17 | 292886 | 1,02 | down |
| 5732981 | 7087492 | 1096708 | TBC1 domain family, member 23 | Tbc1d23 | 304019 | 1,08 | up   |
| 5813631 | 7087492 | 1096710 | TBC1 domain family, member 23 | Tbc1d23 | 304019 | 1,19 | down |
| 6101508 | 7087492 | 1096711 | TBC1 domain family, member 23 | Tbc1d23 | 304019 | 1,11 | down |
| 6200349 | 7087492 | 1096707 | TBC1 domain family, member 23 | Tbc1d23 | 304019 | 1,11 | up   |
| 6202808 | 7087492 | 1096712 | TBC1 domain family, member 23 | Tbc1d23 | 304019 | 2,19 | down |
| 6275056 | 7087492 | 1096712 | TBC1 domain family, member 23 | Tbc1d23 | 304019 | 1,55 | up   |
| 6303766 | 7087492 | 1096712 | TBC1 domain family, member 23 | Tbc1d23 | 304019 | 1,48 | down |
| 6352247 | 7087492 | 1096710 | TBC1 domain family, member 23 | Tbc1d23 | 304019 | 1,45 | down |
| 6491159 | 7087492 | 1096709 | TBC1 domain family, member 23 | Tbc1d23 | 304019 | 1,49 | down |
| 5726798 | 7325674 | 1685216 | TBC1 domain family, member 30 | Tbc1d30 | 299824 | 1,26 | down |
| 5649319 | 7082041 | 1084011 | TBK1 binding protein 1        | Tbkbp1  | 266764 | 1,00 | down |
| 5739030 | 7082041 | 1084009 | TBK1 binding protein 1        | Tbkbp1  | 266764 | 1,15 | up   |
| 5843980 | 7082041 | 1084009 | TBK1 binding protein 1        | Tbkbp1  | 266764 | 2,80 | down |
| 5905817 | 7082041 | 1084014 | TBK1 binding protein 1        | Tbkbp1  | 266764 | 1,25 | up   |
| 5950676 | 7082041 | 1084015 | TBK1 binding protein 1        | Tbkbp1  | 266764 | 1,35 | up   |
| 6026099 | 7082041 | 1084017 | TBK1 binding protein 1        | Tbkbp1  | 266764 | 1,86 | up   |
| 6036870 | 7082041 | 1084018 | TBK1 binding protein 1        | Tbkbp1  | 266764 | 1,32 | down |
| 6205606 | 7082041 | 1084011 | TBK1 binding protein 1        | Tbkbp1  | 266764 | 1,09 | down |
| 6212298 | 7082041 | 1084017 | TBK1 binding protein 1        | Tbkbp1  | 266764 | 2,11 | up   |
| 6228764 | 7082041 | 1084013 | TBK1 binding protein 1        | Tbkbp1  | 266764 | 1,47 | up   |
| 6245821 | 7082041 | 1084018 | TBK1 binding protein 1        | Tbkbp1  | 266764 | 1,76 | down |
| 6262768 | 7082041 | 1084018 | TBK1 binding protein 1        | Tbkbp1  | 266764 | 1,81 | down |
| 6421691 | 7082041 | 1084016 | TBK1 binding protein 1        | Tbkbp1  | 266764 | 1,61 | up   |
| 6449577 | 7082041 | 1084010 | TBK1 binding protein 1        | Tbkbp1  | 266764 | 1,70 | up   |
| 6592498 | 7082041 | 1084012 | TBK1 binding protein 1        | Tbkbp1  | 266764 | 1,25 | down |
| 6732584 | 7082041 | 1084019 | TBK1 binding protein 1        | Tbkbp1  | 266764 | 1,85 | down |
| 5706999 | 7089762 | 1102996 | T-box 1                       | Tbx1    | 360737 | 1,25 | down |
| 5717285 | 7089762 | 1102988 | T-box 1                       | Tbx1    | 360737 | 1,03 | up   |
| 6011060 | 7089762 | 1102984 | T-box 1                       | Tbx1    | 360737 | 1,15 | up   |
| 6100655 | 7089762 | 1102993 | T-box 1                       | Tbx1    | 360737 | 1,02 | up   |
| 6229933 | 7089762 | 1102994 | T-box 1                       | Tbx1    | 360737 | 2,27 | down |
| 6273576 | 7089762 | 1102995 | T-box 1                       | Tbx1    | 360737 | 1,36 | down |
| 6303127 | 7089762 | 1102989 | T-box 1                       | Tbx1    | 360737 | 1,22 | up   |
| 6410151 | 7089762 | 1102992 | T-box 1                       | Tbx1    | 360737 | 1,11 | down |
| 6418681 | 7089762 | 1102986 | T-box 1                       | Tbx1    | 360737 | 1,00 | up   |
| 6442442 | 7089762 | 1102988 | T-box 1                       | Tbx1    | 360737 | 1,12 | down |
| 6451407 | 7089762 | 1102996 | T-box 1                       | Tbx1    | 360737 | 1,14 | up   |
| 6737739 | 7089762 | 1102990 | T-box 1                       | Tbx1    | 360737 | 1,21 | up   |
| 5653894 | 7348487 | 1741269 | T-box18                       | Tbx18   | 315870 | 1,65 | down |

|         |         |         |                                  |       |        |      |      |
|---------|---------|---------|----------------------------------|-------|--------|------|------|
| 6067415 | 7348487 | 1741259 | T-box18                          | Tbx18 | 315870 | 1,00 | down |
| 6097845 | 7348487 | 1741271 | T-box18                          | Tbx18 | 315870 | 1,03 | up   |
| 6142422 | 7348487 | 1741261 | T-box18                          | Tbx18 | 315870 | 1,10 | up   |
| 6144613 | 7348487 | 1741269 | T-box18                          | Tbx18 | 315870 | 1,19 | up   |
| 6162602 | 7348487 | 1741271 | T-box18                          | Tbx18 | 315870 | 2,27 | down |
| 6186026 | 7348487 | 1741259 | T-box18                          | Tbx18 | 315870 | 1,20 | down |
| 6220265 | 7348487 | 1741264 | T-box18                          | Tbx18 | 315870 | 1,14 | up   |
| 6239315 | 7348487 | 1741266 | T-box18                          | Tbx18 | 315870 | 1,08 | up   |
| 6278572 | 7348487 | 1741265 | T-box18                          | Tbx18 | 315870 | 1,30 | up   |
| 6415659 | 7348487 | 1741259 | T-box18                          | Tbx18 | 315870 | 1,01 | down |
| 6524087 | 7348487 | 1741272 | T-box18                          | Tbx18 | 315870 | 1,42 | down |
| 6529367 | 7348487 | 1741271 | T-box18                          | Tbx18 | 315870 | 1,66 | down |
| 6573331 | 7348487 | 1741263 | T-box18                          | Tbx18 | 315870 | 1,40 | down |
| 6611408 | 7348487 | 1741259 | T-box18                          | Tbx18 | 315870 | 1,39 | up   |
| 6647963 | 7348487 | 1741272 | T-box18                          | Tbx18 | 315870 | 1,05 | down |
| 6702996 | 7348487 | 1741269 | T-box18                          | Tbx18 | 315870 | 1,09 | up   |
| 5647660 | 7118157 | 1172513 | tec protein tyrosine kinase      | Tec   | 84492  | 1,11 | down |
| 5713048 | 7118157 | 1172510 | tec protein tyrosine kinase      | Tec   | 84492  | 1,09 | up   |
| 5729850 | 7118157 | 1172520 | tec protein tyrosine kinase      | Tec   | 84492  | 1,10 | up   |
| 5797172 | 7118157 | 1172499 | tec protein tyrosine kinase      | Tec   | 84492  | 1,05 | up   |
| 5892219 | 7118157 | 1172514 | tec protein tyrosine kinase      | Tec   | 84492  | 1,48 | up   |
| 6012146 | 7118157 | 1172525 | tec protein tyrosine kinase      | Tec   | 84492  | 2,11 | down |
| 6023225 | 7118157 | 1172506 | tec protein tyrosine kinase      | Tec   | 84492  | 1,14 | up   |
| 6088361 | 7118157 | 1172507 | tec protein tyrosine kinase      | Tec   | 84492  | 1,01 | up   |
| 6109897 | 7118157 | 1172518 | tec protein tyrosine kinase      | Tec   | 84492  | 1,96 | up   |
| 6139440 | 7118157 | 1172508 | tec protein tyrosine kinase      | Tec   | 84492  | 1,01 | down |
| 6158993 | 7118157 | 1172511 | tec protein tyrosine kinase      | Tec   | 84492  | 1,61 | up   |
| 6165349 | 7118157 | 1172496 | tec protein tyrosine kinase      | Tec   | 84492  | 1,45 | up   |
| 6172707 | 7118157 | 1172517 | tec protein tyrosine kinase      | Tec   | 84492  | 2,17 | up   |
| 6231114 | 7118157 | 1172521 | tec protein tyrosine kinase      | Tec   | 84492  | 1,54 | up   |
| 6240841 | 7118157 | 1172524 | tec protein tyrosine kinase      | Tec   | 84492  | 1,00 | down |
| 6320358 | 7118157 | 1172522 | tec protein tyrosine kinase      | Tec   | 84492  | 1,14 | down |
| 6346234 | 7118157 | 1172497 | tec protein tyrosine kinase      | Tec   | 84492  | 1,05 | down |
| 6349841 | 7118157 | 1172510 | tec protein tyrosine kinase      | Tec   | 84492  | 1,96 | down |
| 6492723 | 7118157 | 1172515 | tec protein tyrosine kinase      | Tec   | 84492  | 1,19 | down |
| 6529975 | 7118157 | 1172516 | tec protein tyrosine kinase      | Tec   | 84492  | 1,32 | down |
| 6555497 | 7118157 | 1172505 | tec protein tyrosine kinase      | Tec   | 84492  | 1,11 | down |
| 5665997 | 7045525 | 999739  | telomerase reverse transcriptase | Tert  | 301965 | 1,35 | up   |
| 5724240 | 7045525 | 999738  | telomerase reverse transcriptase | Tert  | 301965 | 1,43 | up   |
| 5729569 | 7045525 | 999739  | telomerase reverse transcriptase | Tert  | 301965 | 1,24 | down |
| 5755125 | 7045525 | 999734  | telomerase reverse transcriptase | Tert  | 301965 | 1,34 | down |
| 5950060 | 7045525 | 999731  | telomerase reverse transcriptase | Tert  | 301965 | 1,73 | up   |
| 5962614 | 7045525 | 999742  | telomerase reverse transcriptase | Tert  | 301965 | 1,01 | down |
| 6038645 | 7045525 | 999726  | telomerase reverse transcriptase | Tert  | 301965 | 1,55 | up   |
| 6080613 | 7045525 | 999742  | telomerase reverse transcriptase | Tert  | 301965 | 1,54 | down |
| 6097757 | 7045525 | 999730  | telomerase reverse transcriptase | Tert  | 301965 | 1,18 | up   |
| 6115418 | 7045525 | 999743  | telomerase reverse transcriptase | Tert  | 301965 | 1,15 | down |
| 6116645 | 7045525 | 999730  | telomerase reverse transcriptase | Tert  | 301965 | 1,09 | down |
| 6118341 | 7045525 | 999737  | telomerase reverse transcriptase | Tert  | 301965 | 1,74 | down |
| 6187478 | 7045525 | 999735  | telomerase reverse transcriptase | Tert  | 301965 | 1,05 | down |
| 6188792 | 7045525 | 999736  | telomerase reverse transcriptase | Tert  | 301965 | 2,36 | down |
| 6202504 | 7045525 | 999743  | telomerase reverse transcriptase | Tert  | 301965 | 1,23 | down |
| 6310095 | 7045525 | 999742  | telomerase reverse transcriptase | Tert  | 301965 | 1,37 | up   |
| 6315217 | 7045525 | 999732  | telomerase reverse transcriptase | Tert  | 301965 | 1,27 | down |
| 6324130 | 7045525 | 999727  | telomerase reverse transcriptase | Tert  | 301965 | 1,05 | down |
| 6349205 | 7045525 | 999737  | telomerase reverse transcriptase | Tert  | 301965 | 1,12 | up   |

|         |         |         |                                  |       |        |      |      |
|---------|---------|---------|----------------------------------|-------|--------|------|------|
| 6441111 | 7045525 | 999728  | telomerase reverse transcriptase | Tert  | 301965 | 1,69 | down |
| 6456521 | 7045525 | 999743  | telomerase reverse transcriptase | Tert  | 301965 | 1,09 | up   |
| 6482207 | 7045525 | 999733  | telomerase reverse transcriptase | Tert  | 301965 | 1,40 | up   |
| 6543143 | 7045525 | 999729  | telomerase reverse transcriptase | Tert  | 301965 | 1,05 | up   |
| 6587806 | 7045525 | 999733  | telomerase reverse transcriptase | Tert  | 301965 | 1,32 | down |
| 6731649 | 7045525 | 999741  | telomerase reverse transcriptase | Tert  | 301965 | 1,08 | down |
| 5660142 | 7106824 | 1144280 | tenascin R                       | Tnr   | 25567  | 1,06 | down |
| 5687030 | 7106824 | 1144274 | tenascin R                       | Tnr   | 25567  | 1,06 | up   |
| 5779153 | 7106824 | 1144279 | tenascin R                       | Tnr   | 25567  | 1,02 | up   |
| 5780385 | 7106824 | 1144276 | tenascin R                       | Tnr   | 25567  | 1,39 | up   |
| 5799636 | 7106824 | 1144281 | tenascin R                       | Tnr   | 25567  | 1,04 | up   |
| 5801212 | 7106824 | 1144286 | tenascin R                       | Tnr   | 25567  | 1,27 | up   |
| 5812885 | 7106824 | 1144278 | tenascin R                       | Tnr   | 25567  | 1,33 | down |
| 5943007 | 7106824 | 1144287 | tenascin R                       | Tnr   | 25567  | 1,40 | down |
| 5951623 | 7106824 | 1144292 | tenascin R                       | Tnr   | 25567  | 1,34 | down |
| 6001298 | 7106824 | 1144284 | tenascin R                       | Tnr   | 25567  | 1,31 | down |
| 6021249 | 7106824 | 1144290 | tenascin R                       | Tnr   | 25567  | 1,28 | down |
| 6217821 | 7106824 | 1144282 | tenascin R                       | Tnr   | 25567  | 2,69 | up   |
| 6238673 | 7106824 | 1144287 | tenascin R                       | Tnr   | 25567  | 1,11 | up   |
| 6270522 | 7106824 | 1144293 | tenascin R                       | Tnr   | 25567  | 1,02 | up   |
| 6274136 | 7106824 | 1144277 | tenascin R                       | Tnr   | 25567  | 1,19 | down |
| 6317705 | 7106824 | 1144271 | tenascin R                       | Tnr   | 25567  | 1,18 | up   |
| 6322901 | 7106824 | 1144271 | tenascin R                       | Tnr   | 25567  | 1,00 | down |
| 6340318 | 7106824 | 1144271 | tenascin R                       | Tnr   | 25567  | 1,31 | down |
| 6341309 | 7106824 | 1144278 | tenascin R                       | Tnr   | 25567  | 1,45 | up   |
| 6348083 | 7106824 | 1144275 | tenascin R                       | Tnr   | 25567  | 1,24 | up   |
| 6382206 | 7106824 | 1144285 | tenascin R                       | Tnr   | 25567  | 1,02 | up   |
| 6511356 | 7106824 | 1144291 | tenascin R                       | Tnr   | 25567  | 1,14 | up   |
| 6534711 | 7106824 | 1144289 | tenascin R                       | Tnr   | 25567  | 1,25 | down |
| 6592021 | 7106824 | 1144272 | tenascin R                       | Tnr   | 25567  | 1,01 | down |
| 6638405 | 7106824 | 1144283 | tenascin R                       | Tnr   | 25567  | 1,01 | down |
| 6669443 | 7106824 | 1144273 | tenascin R                       | Tnr   | 25567  | 1,35 | down |
| 6740058 | 7106824 | 1144288 | tenascin R                       | Tnr   | 25567  | 1,05 | down |
| 5636090 | 7363674 | 1778439 | tensin 1                         | Tns1  | 301509 | 1,32 | down |
| 5669326 | 7363674 | 1778397 | tensin 1                         | Tns1  | 301509 | 1,01 | up   |
| 5695518 | 7363674 | 1778397 | tensin 1                         | Tns1  | 301509 | 1,05 | up   |
| 5758769 | 7363674 | 1778397 | tensin 1                         | Tns1  | 301509 | 1,61 | down |
| 5913746 | 7363674 | 1778397 | tensin 1                         | Tns1  | 301509 | 1,54 | down |
| 5932876 | 7363674 | 1778399 | tensin 1                         | Tns1  | 301509 | 1,01 | down |
| 6054723 | 7363674 | 1778401 | tensin 1                         | Tns1  | 301509 | 1,03 | up   |
| 6063462 | 7363674 | 1778400 | tensin 1                         | Tns1  | 301509 | 1,12 | up   |
| 6228983 | 7363674 | 1778397 | tensin 1                         | Tns1  | 301509 | 1,11 | up   |
| 6263473 | 7363674 | 1778399 | tensin 1                         | Tns1  | 301509 | 1,32 | down |
| 6321077 | 7363674 | 1778397 | tensin 1                         | Tns1  | 301509 | 1,23 | down |
| 6388767 | 7363674 | 1778402 | tensin 1                         | Tns1  | 301509 | 1,21 | up   |
| 6418430 | 7363674 | 1778398 | tensin 1                         | Tns1  | 301509 | 1,40 | up   |
| 6550782 | 7363674 | 1778446 | tensin 1                         | Tns1  | 301509 | 1,12 | up   |
| 6578664 | 7363674 | 1778445 | tensin 1                         | Tns1  | 301509 | 1,22 | up   |
| 6667742 | 7363674 | 1778397 | tensin 1                         | Tns1  | 301509 | 1,68 | up   |
| 5743730 | 7353280 | 1752959 | testicular serine protease 1     | Tesp1 | 363215 | 1,01 | up   |
| 5836703 | 7353280 | 1752953 | testicular serine protease 1     | Tesp1 | 363215 | 1,09 | up   |
| 5867263 | 7353280 | 1752959 | testicular serine protease 1     | Tesp1 | 363215 | 1,13 | up   |
| 5900008 | 7353280 | 1752956 | testicular serine protease 1     | Tesp1 | 363215 | 1,18 | down |
| 5996181 | 7353280 | 1752953 | testicular serine protease 1     | Tesp1 | 363215 | 1,13 | down |
| 6111951 | 7353280 | 1752958 | testicular serine protease 1     | Tesp1 | 363215 | 2,12 | down |
| 6273030 | 7353280 | 1752954 | testicular serine protease 1     | Tesp1 | 363215 | 1,45 | down |

|         |         |         |                                            |        |        |      |      |
|---------|---------|---------|--------------------------------------------|--------|--------|------|------|
| 6354409 | 7353280 | 1752953 | testicular serine protease 1               | Tesp1  | 363215 | 1,05 | up   |
| 6425897 | 7353280 | 1752955 | testicular serine protease 1               | Tesp1  | 363215 | 1,05 | down |
| 6563959 | 7353280 | 1752957 | testicular serine protease 1               | Tesp1  | 363215 | 1,13 | up   |
| 6622445 | 7353280 | 1752958 | testicular serine protease 1               | Tesp1  | 363215 | 1,00 | down |
| 6670308 | 7353280 | 1752953 | testicular serine protease 1               | Tesp1  | 363215 | 1,00 | down |
| 5873822 | 7070836 | 1058322 | testis expressed 14                        | Tex14  | 287603 | 1,04 | up   |
| 5620727 | 7263248 | 1530602 | testis specific, 14                        | Tsga14 | 500069 | 1,26 | up   |
| 5769181 | 7263248 | 1530608 | testis specific, 14                        | Tsga14 | 500069 | 1,08 | down |
| 5840520 | 7263248 | 1530602 | testis specific, 14                        | Tsga14 | 500069 | 1,04 | up   |
| 5927903 | 7263248 | 1530602 | testis specific, 14                        | Tsga14 | 500069 | 1,47 | down |
| 6002160 | 7263248 | 1530608 | testis specific, 14                        | Tsga14 | 500069 | 1,26 | down |
| 6048657 | 7263248 | 1530603 | testis specific, 14                        | Tsga14 | 500069 | 1,62 | down |
| 6237384 | 7263248 | 1530604 | testis specific, 14                        | Tsga14 | 500069 | 2,35 | down |
| 6241054 | 7263248 | 1530609 | testis specific, 14                        | Tsga14 | 500069 | 1,01 | down |
| 6271522 | 7263248 | 1530602 | testis specific, 14                        | Tsga14 | 500069 | 1,57 | up   |
| 6365683 | 7263248 | 1530612 | testis specific, 14                        | Tsga14 | 500069 | 1,84 | up   |
| 6481515 | 7263248 | 1530602 | testis specific, 14                        | Tsga14 | 500069 | 1,14 | down |
| 6547164 | 7263248 | 1530602 | testis specific, 14                        | Tsga14 | 500069 | 1,41 | up   |
| 6594612 | 7263248 | 1530611 | testis specific, 14                        | Tsga14 | 500069 | 1,41 | down |
| 6595078 | 7263248 | 1530613 | testis specific, 14                        | Tsga14 | 500069 | 1,25 | up   |
| 6743439 | 7263248 | 1530606 | testis specific, 14                        | Tsga14 | 500069 | 1,00 | down |
| 5725979 | 7182704 | 1332505 | testis/prostate/placenta-expressed protein | Tepp   | 291850 | 1,59 | down |
| 6031944 | 7182704 | 1332506 | testis/prostate/placenta-expressed protein | Tepp   | 291850 | 1,05 | up   |
| 6137185 | 7182704 | 1332501 | testis/prostate/placenta-expressed protein | Tepp   | 291850 | 3,00 | up   |
| 6493840 | 7182704 | 1332502 | testis/prostate/placenta-expressed protein | Tepp   | 291850 | 1,26 | down |
| 6500344 | 7182704 | 1332503 | testis/prostate/placenta-expressed protein | Tepp   | 291850 | 1,31 | down |
| 6622561 | 7182704 | 1332508 | testis/prostate/placenta-expressed protein | Tepp   | 291850 | 1,10 | up   |
| 6647752 | 7182704 | 1332504 | testis/prostate/placenta-expressed protein | Tepp   | 291850 | 1,02 | up   |
| 6662310 | 7182704 | 1332507 | testis/prostate/placenta-expressed protein | Tepp   | 291850 | 1,23 | up   |
| 5677465 | 7340741 | 1721859 | testis-specific serine protease-6          | Tessp6 | 408245 | 1,21 | up   |
| 5784725 | 7340741 | 1721861 | testis-specific serine protease-6          | Tessp6 | 408245 | 1,15 | down |
| 6117518 | 7340741 | 1721861 | testis-specific serine protease-6          | Tessp6 | 408245 | 1,36 | down |
| 6135439 | 7340741 | 1721860 | testis-specific serine protease-6          | Tessp6 | 408245 | 1,13 | up   |
| 6730636 | 7340741 | 1721858 | testis-specific serine protease-6          | Tessp6 | 408245 | 2,07 | up   |
| 5660620 | 7197536 | 1369209 | tetraspanin 2                              | Tspan2 | 64521  | 2,32 | down |
| 5731310 | 7197536 | 1369207 | tetraspanin 2                              | Tspan2 | 64521  | 1,52 | up   |
| 5827188 | 7197536 | 1369201 | tetraspanin 2                              | Tspan2 | 64521  | 1,33 | down |
| 5842228 | 7197536 | 1369208 | tetraspanin 2                              | Tspan2 | 64521  | 1,67 | down |
| 5952140 | 7197536 | 1369206 | tetraspanin 2                              | Tspan2 | 64521  | 2,29 | up   |
| 6123970 | 7197536 | 1369202 | tetraspanin 2                              | Tspan2 | 64521  | 1,12 | up   |
| 6211511 | 7197536 | 1369203 | tetraspanin 2                              | Tspan2 | 64521  | 1,53 | up   |
| 6245983 | 7197536 | 1369204 | tetraspanin 2                              | Tspan2 | 64521  | 1,70 | down |
| 6379630 | 7197536 | 1369205 | tetraspanin 2                              | Tspan2 | 64521  | 1,16 | up   |
| 6497581 | 7197536 | 1369209 | tetraspanin 2                              | Tspan2 | 64521  | 1,04 | down |
| 6726350 | 7197536 | 1369200 | tetraspanin 2                              | Tspan2 | 64521  | 1,32 | down |
| 5891249 | 7383501 | 1828201 | tetraspanin 6                              | Tspan6 | 302313 | 1,17 | down |
| 5932653 | 7383501 | 1828205 | tetraspanin 6                              | Tspan6 | 302313 | 1,55 | down |
| 6077890 | 7383501 | 1828200 | tetraspanin 6                              | Tspan6 | 302313 | 1,07 | up   |
| 6103700 | 7383501 | 1828204 | tetraspanin 6                              | Tspan6 | 302313 | 1,39 | down |
| 6135162 | 7383501 | 1828202 | tetraspanin 6                              | Tspan6 | 302313 | 1,05 | up   |
| 6232563 | 7383501 | 1828203 | tetraspanin 6                              | Tspan6 | 302313 | 1,08 | down |
| 6393114 | 7383501 | 1828206 | tetraspanin 6                              | Tspan6 | 302313 | 1,01 | up   |
| 6468235 | 7383501 | 1828207 | tetraspanin 6                              | Tspan6 | 302313 | 1,08 | up   |
| 5628804 | 7076581 | 1072203 | tetratricopeptide repeat domain 1          | Ttc1   | 287208 | 2,95 | down |
| 6024196 | 7076581 | 1072206 | tetratricopeptide repeat domain 1          | Ttc1   | 287208 | 1,16 | up   |
| 6062440 | 7076581 | 1072205 | tetratricopeptide repeat domain 1          | Ttc1   | 287208 | 1,09 | up   |

|         |         |         |                                     |        |        |      |      |
|---------|---------|---------|-------------------------------------|--------|--------|------|------|
| 6279152 | 7076581 | 1072202 | tetratricopeptide repeat domain 1   | Ttc1   | 287208 | 1,24 | up   |
| 6306902 | 7076581 | 1072200 | tetratricopeptide repeat domain 1   | Ttc1   | 287208 | 1,03 | up   |
| 6426317 | 7076581 | 1072206 | tetratricopeptide repeat domain 1   | Ttc1   | 287208 | 1,05 | up   |
| 6440466 | 7076581 | 1072204 | tetratricopeptide repeat domain 1   | Ttc1   | 287208 | 1,42 | up   |
| 6448577 | 7076581 | 1072199 | tetratricopeptide repeat domain 1   | Ttc1   | 287208 | 1,12 | up   |
| 6527924 | 7076581 | 1072201 | tetratricopeptide repeat domain 1   | Ttc1   | 287208 | 1,25 | down |
| 6004943 | 7239752 | 1473198 | tetratricopeptide repeat domain 21B | Ttc21b | 295654 | 1,33 | up   |
| 6617691 | 7239752 | 1473154 | tetratricopeptide repeat domain 21B | Ttc21b | 295654 | 1,03 | down |
| 5665369 | 7032618 | 967310  | tetratricopeptide repeat domain 23  | Ttc23  | 308708 | 1,01 | up   |
| 5839689 | 7032618 | 967331  | tetratricopeptide repeat domain 23  | Ttc23  | 308708 | 1,20 | down |
| 5853520 | 7032618 | 967311  | tetratricopeptide repeat domain 23  | Ttc23  | 308708 | 1,23 | up   |
| 6006320 | 7032618 | 967309  | tetratricopeptide repeat domain 23  | Ttc23  | 308708 | 2,17 | down |
| 6059635 | 7032618 | 967319  | tetratricopeptide repeat domain 23  | Ttc23  | 308708 | 1,14 | down |
| 6216512 | 7032618 | 967314  | tetratricopeptide repeat domain 23  | Ttc23  | 308708 | 1,12 | down |
| 6285489 | 7032618 | 967308  | tetratricopeptide repeat domain 23  | Ttc23  | 308708 | 1,31 | down |
| 6333298 | 7032618 | 967323  | tetratricopeptide repeat domain 23  | Ttc23  | 308708 | 1,15 | down |
| 6407691 | 7032618 | 967332  | tetratricopeptide repeat domain 23  | Ttc23  | 308708 | 1,18 | up   |
| 6527412 | 7032618 | 967332  | tetratricopeptide repeat domain 23  | Ttc23  | 308708 | 1,02 | up   |
| 6557713 | 7032618 | 967326  | tetratricopeptide repeat domain 23  | Ttc23  | 308708 | 1,10 | up   |
| 6597763 | 7032618 | 967314  | tetratricopeptide repeat domain 23  | Ttc23  | 308708 | 1,06 | down |
| 6668232 | 7032618 | 967306  | tetratricopeptide repeat domain 23  | Ttc23  | 308708 | 1,01 | down |
| 6698700 | 7032618 | 967306  | tetratricopeptide repeat domain 23  | Ttc23  | 308708 | 1,12 | up   |
| 5941279 | 7190317 | 1350512 | tetratricopeptide repeat domain 33  | Ttc33  | 294774 | 1,33 | down |
| 5962868 | 7190317 | 1350503 | tetratricopeptide repeat domain 33  | Ttc33  | 294774 | 1,14 | up   |
| 6046244 | 7190317 | 1350511 | tetratricopeptide repeat domain 33  | Ttc33  | 294774 | 1,03 | down |
| 6159746 | 7190317 | 1350508 | tetratricopeptide repeat domain 33  | Ttc33  | 294774 | 1,04 | up   |
| 6466485 | 7190317 | 1350505 | tetratricopeptide repeat domain 33  | Ttc33  | 294774 | 1,12 | up   |
| 6531378 | 7190317 | 1350512 | tetratricopeptide repeat domain 33  | Ttc33  | 294774 | 1,00 | up   |
| 6592760 | 7190317 | 1350503 | tetratricopeptide repeat domain 33  | Ttc33  | 294774 | 1,09 | up   |
| 5741779 | 7316589 | 1663879 | tetratricopeptide repeat domain 35  | Ttc35  | 362905 | 1,15 | up   |
| 5876351 | 7316589 | 1663885 | tetratricopeptide repeat domain 35  | Ttc35  | 362905 | 1,04 | up   |
| 5921278 | 7316589 | 1663883 | tetratricopeptide repeat domain 35  | Ttc35  | 362905 | 1,14 | up   |
| 6021114 | 7316589 | 1663886 | tetratricopeptide repeat domain 35  | Ttc35  | 362905 | 1,05 | down |
| 6066220 | 7316589 | 1663880 | tetratricopeptide repeat domain 35  | Ttc35  | 362905 | 1,23 | up   |
| 6097836 | 7316589 | 1663889 | tetratricopeptide repeat domain 35  | Ttc35  | 362905 | 1,08 | down |
| 6274317 | 7316589 | 1663882 | tetratricopeptide repeat domain 35  | Ttc35  | 362905 | 1,03 | down |
| 6472616 | 7316589 | 1663878 | tetratricopeptide repeat domain 35  | Ttc35  | 362905 | 1,22 | up   |
| 6487761 | 7316589 | 1663884 | tetratricopeptide repeat domain 35  | Ttc35  | 362905 | 1,01 | up   |
| 6604028 | 7316589 | 1663881 | tetratricopeptide repeat domain 35  | Ttc35  | 362905 | 1,08 | down |
| 6667706 | 7316589 | 1663876 | tetratricopeptide repeat domain 35  | Ttc35  | 362905 | 1,36 | up   |
| 6741757 | 7316589 | 1663890 | tetratricopeptide repeat domain 35  | Ttc35  | 362905 | 1,28 | down |
| 5636809 | 7288095 | 1592058 | tetratricopeptide repeat domain 39B | Ttc39b | 298186 | 1,52 | down |
| 5646640 | 7288095 | 1592052 | tetratricopeptide repeat domain 39B | Ttc39b | 298186 | 1,11 | down |
| 5726020 | 7288095 | 1592044 | tetratricopeptide repeat domain 39B | Ttc39b | 298186 | 1,11 | up   |
| 5767907 | 7288095 | 1592054 | tetratricopeptide repeat domain 39B | Ttc39b | 298186 | 1,05 | up   |
| 5815871 | 7288095 | 1592064 | tetratricopeptide repeat domain 39B | Ttc39b | 298186 | 1,12 | up   |
| 5852797 | 7288095 | 1592047 | tetratricopeptide repeat domain 39B | Ttc39b | 298186 | 1,36 | up   |
| 5865183 | 7288095 | 1592060 | tetratricopeptide repeat domain 39B | Ttc39b | 298186 | 1,00 | up   |
| 5955703 | 7288095 | 1592056 | tetratricopeptide repeat domain 39B | Ttc39b | 298186 | 1,13 | up   |
| 6003460 | 7288095 | 1592082 | tetratricopeptide repeat domain 39B | Ttc39b | 298186 | 1,51 | up   |
| 6036445 | 7288095 | 1592055 | tetratricopeptide repeat domain 39B | Ttc39b | 298186 | 1,36 | up   |
| 6041789 | 7288095 | 1592059 | tetratricopeptide repeat domain 39B | Ttc39b | 298186 | 1,08 | up   |
| 6075527 | 7288095 | 1592057 | tetratricopeptide repeat domain 39B | Ttc39b | 298186 | 1,16 | up   |
| 6096713 | 7288095 | 1592091 | tetratricopeptide repeat domain 39B | Ttc39b | 298186 | 1,68 | down |
| 6164935 | 7288095 | 1592091 | tetratricopeptide repeat domain 39B | Ttc39b | 298186 | 1,03 | up   |
| 6220899 | 7288095 | 1592068 | tetratricopeptide repeat domain 39B | Ttc39b | 298186 | 1,18 | down |

|         |         |         |                                     |        |        |      |      |
|---------|---------|---------|-------------------------------------|--------|--------|------|------|
| 6223022 | 7288095 | 1592063 | tetratricopeptide repeat domain 39B | Ttc39b | 298186 | 1,02 | up   |
| 6410538 | 7288095 | 1592065 | tetratricopeptide repeat domain 39B | Ttc39b | 298186 | 1,03 | up   |
| 6459218 | 7288095 | 1592053 | tetratricopeptide repeat domain 39B | Ttc39b | 298186 | 1,15 | up   |
| 6485046 | 7288095 | 1592050 | tetratricopeptide repeat domain 39B | Ttc39b | 298186 | 1,03 | down |
| 6590272 | 7288095 | 1592051 | tetratricopeptide repeat domain 39B | Ttc39b | 298186 | 1,04 | up   |
| 6619451 | 7288095 | 1592046 | tetratricopeptide repeat domain 39B | Ttc39b | 298186 | 1,04 | down |
| 6732548 | 7288095 | 1592049 | tetratricopeptide repeat domain 39B | Ttc39b | 298186 | 1,23 | down |
| 6737205 | 7288095 | 1592044 | tetratricopeptide repeat domain 39B | Ttc39b | 298186 | 1,64 | up   |
| 5778018 | 7289611 | 1595903 | tetratricopeptide repeat domain 4   | Ttc4   | 362556 | 1,14 | down |
| 5915470 | 7289611 | 1595900 | tetratricopeptide repeat domain 4   | Ttc4   | 362556 | 1,76 | down |
| 5986729 | 7289611 | 1595900 | tetratricopeptide repeat domain 4   | Ttc4   | 362556 | 1,60 | up   |
| 6062728 | 7289611 | 1595904 | tetratricopeptide repeat domain 4   | Ttc4   | 362556 | 1,21 | up   |
| 6235190 | 7289611 | 1595902 | tetratricopeptide repeat domain 4   | Ttc4   | 362556 | 1,17 | up   |
| 6278912 | 7289611 | 1595900 | tetratricopeptide repeat domain 4   | Ttc4   | 362556 | 1,09 | up   |
| 6467326 | 7289611 | 1595901 | tetratricopeptide repeat domain 4   | Ttc4   | 362556 | 1,10 | down |
| 6666349 | 7289611 | 1595905 | tetratricopeptide repeat domain 4   | Ttc4   | 362556 | 2,23 | down |
| 5632286 | 7294866 | 1608400 | tetratricopeptide repeat domain 7   | Ttc7   | 362696 | 1,00 | down |
| 5666973 | 7294866 | 1608427 | tetratricopeptide repeat domain 7   | Ttc7   | 362696 | 1,27 | down |
| 5689597 | 7294866 | 1608434 | tetratricopeptide repeat domain 7   | Ttc7   | 362696 | 1,00 | down |
| 5794579 | 7294866 | 1608390 | tetratricopeptide repeat domain 7   | Ttc7   | 362696 | 1,27 | down |
| 5801554 | 7294866 | 1608413 | tetratricopeptide repeat domain 7   | Ttc7   | 362696 | 1,00 | up   |
| 5834803 | 7294866 | 1608417 | tetratricopeptide repeat domain 7   | Ttc7   | 362696 | 1,05 | up   |
| 5906681 | 7294866 | 1608404 | tetratricopeptide repeat domain 7   | Ttc7   | 362696 | 1,11 | down |
| 5995981 | 7294866 | 1608423 | tetratricopeptide repeat domain 7   | Ttc7   | 362696 | 1,10 | down |
| 6147295 | 7294866 | 1608391 | tetratricopeptide repeat domain 7   | Ttc7   | 362696 | 1,09 | up   |
| 6150170 | 7294866 | 1608418 | tetratricopeptide repeat domain 7   | Ttc7   | 362696 | 1,13 | up   |
| 6191753 | 7294866 | 1608390 | tetratricopeptide repeat domain 7   | Ttc7   | 362696 | 1,16 | up   |
| 6288866 | 7294866 | 1608420 | tetratricopeptide repeat domain 7   | Ttc7   | 362696 | 1,10 | up   |
| 6316333 | 7294866 | 1608394 | tetratricopeptide repeat domain 7   | Ttc7   | 362696 | 1,03 | down |
| 6332352 | 7294866 | 1608411 | tetratricopeptide repeat domain 7   | Ttc7   | 362696 | 1,08 | down |
| 6353649 | 7294866 | 1608426 | tetratricopeptide repeat domain 7   | Ttc7   | 362696 | 1,12 | up   |
| 6359068 | 7294866 | 1608406 | tetratricopeptide repeat domain 7   | Ttc7   | 362696 | 1,14 | down |
| 6465916 | 7294866 | 1608410 | tetratricopeptide repeat domain 7   | Ttc7   | 362696 | 1,21 | up   |
| 6518238 | 7294866 | 1608401 | tetratricopeptide repeat domain 7   | Ttc7   | 362696 | 1,05 | up   |
| 6526217 | 7294866 | 1608419 | tetratricopeptide repeat domain 7   | Ttc7   | 362696 | 1,28 | down |
| 6543276 | 7294866 | 1608425 | tetratricopeptide repeat domain 7   | Ttc7   | 362696 | 1,03 | down |
| 6548479 | 7294866 | 1608405 | tetratricopeptide repeat domain 7   | Ttc7   | 362696 | 1,02 | up   |
| 6647539 | 7294866 | 1608435 | tetratricopeptide repeat domain 7   | Ttc7   | 362696 | 1,14 | up   |
| 6688072 | 7294866 | 1608390 | tetratricopeptide repeat domain 7   | Ttc7   | 362696 | 1,25 | up   |
| 5671049 | 7300906 | 1624056 | tetratricopeptide repeat domain 8   | Ttc8   | 299246 | 1,40 | down |
| 5762222 | 7300906 | 1624045 | tetratricopeptide repeat domain 8   | Ttc8   | 299246 | 1,36 | up   |
| 5853335 | 7300906 | 1624054 | tetratricopeptide repeat domain 8   | Ttc8   | 299246 | 1,43 | down |
| 5968527 | 7300906 | 1624051 | tetratricopeptide repeat domain 8   | Ttc8   | 299246 | 1,23 | down |
| 6088844 | 7300906 | 1624052 | tetratricopeptide repeat domain 8   | Ttc8   | 299246 | 1,11 | up   |
| 6096946 | 7300906 | 1624053 | tetratricopeptide repeat domain 8   | Ttc8   | 299246 | 1,18 | up   |
| 6249953 | 7300906 | 1624062 | tetratricopeptide repeat domain 8   | Ttc8   | 299246 | 1,72 | down |
| 6321385 | 7300906 | 1624063 | tetratricopeptide repeat domain 8   | Ttc8   | 299246 | 1,00 | up   |
| 6368547 | 7300906 | 1624055 | tetratricopeptide repeat domain 8   | Ttc8   | 299246 | 1,04 | down |
| 6371253 | 7300906 | 1624045 | tetratricopeptide repeat domain 8   | Ttc8   | 299246 | 2,16 | up   |
| 6410876 | 7300906 | 1624061 | tetratricopeptide repeat domain 8   | Ttc8   | 299246 | 1,21 | down |
| 6426585 | 7300906 | 1624052 | tetratricopeptide repeat domain 8   | Ttc8   | 299246 | 1,44 | up   |
| 6428939 | 7300906 | 1624064 | tetratricopeptide repeat domain 8   | Ttc8   | 299246 | 1,18 | down |
| 6471963 | 7300906 | 1624050 | tetratricopeptide repeat domain 8   | Ttc8   | 299246 | 1,25 | up   |
| 6518817 | 7300906 | 1624064 | tetratricopeptide repeat domain 8   | Ttc8   | 299246 | 1,66 | up   |
| 6549070 | 7300906 | 1624060 | tetratricopeptide repeat domain 8   | Ttc8   | 299246 | 1,03 | up   |
| 6563710 | 7300906 | 1624057 | tetratricopeptide repeat domain 8   | Ttc8   | 299246 | 1,20 | down |



|         |         |         |                                                                       |        |        |      |      |
|---------|---------|---------|-----------------------------------------------------------------------|--------|--------|------|------|
| 6746100 | 7300906 | 1624050 | tetratricopeptide repeat domain 8                                     | Ttc8   | 299246 | 1,18 | down |
| 5637668 | 7227811 | 1442006 | tetratricopeptide repeat, ankyrin repeat and coiled-coil containing 1 | Tanc1  | 311055 | 1,19 | up   |
| 5670967 | 7227811 | 1442003 | tetratricopeptide repeat, ankyrin repeat and coiled-coil containing 1 | Tanc1  | 311055 | 1,03 | up   |
| 5720823 | 7227811 | 1441994 | tetratricopeptide repeat, ankyrin repeat and coiled-coil containing 1 | Tanc1  | 311055 | 1,51 | down |
| 5732286 | 7227811 | 1442016 | tetratricopeptide repeat, ankyrin repeat and coiled-coil containing 1 | Tanc1  | 311055 | 1,06 | down |
| 5782473 | 7227811 | 1442009 | tetratricopeptide repeat, ankyrin repeat and coiled-coil containing 1 | Tanc1  | 311055 | 2,25 | down |
| 5783906 | 7227811 | 1441993 | tetratricopeptide repeat, ankyrin repeat and coiled-coil containing 1 | Tanc1  | 311055 | 1,06 | down |
| 5795857 | 7227811 | 1442016 | tetratricopeptide repeat, ankyrin repeat and coiled-coil containing 1 | Tanc1  | 311055 | 1,24 | up   |
| 5803772 | 7227811 | 1442012 | tetratricopeptide repeat, ankyrin repeat and coiled-coil containing 1 | Tanc1  | 311055 | 1,01 | up   |
| 5841808 | 7227811 | 1442004 | tetratricopeptide repeat, ankyrin repeat and coiled-coil containing 1 | Tanc1  | 311055 | 1,31 | down |
| 5879595 | 7227811 | 1442013 | tetratricopeptide repeat, ankyrin repeat and coiled-coil containing 1 | Tanc1  | 311055 | 1,08 | up   |
| 5954641 | 7227811 | 1442011 | tetratricopeptide repeat, ankyrin repeat and coiled-coil containing 1 | Tanc1  | 311055 | 1,16 | down |
| 5974867 | 7227811 | 1441995 | tetratricopeptide repeat, ankyrin repeat and coiled-coil containing 1 | Tanc1  | 311055 | 1,29 | up   |
| 5979116 | 7227811 | 1441999 | tetratricopeptide repeat, ankyrin repeat and coiled-coil containing 1 | Tanc1  | 311055 | 1,24 | up   |
| 5994358 | 7227811 | 1441991 | tetratricopeptide repeat, ankyrin repeat and coiled-coil containing 1 | Tanc1  | 311055 | 1,23 | up   |
| 6013966 | 7227811 | 1441992 | tetratricopeptide repeat, ankyrin repeat and coiled-coil containing 1 | Tanc1  | 311055 | 1,02 | up   |
| 6111559 | 7227811 | 1441999 | tetratricopeptide repeat, ankyrin repeat and coiled-coil containing 1 | Tanc1  | 311055 | 2,26 | down |
| 6112304 | 7227811 | 1441996 | tetratricopeptide repeat, ankyrin repeat and coiled-coil containing 1 | Tanc1  | 311055 | 1,03 | up   |
| 6177356 | 7227811 | 1442001 | tetratricopeptide repeat, ankyrin repeat and coiled-coil containing 1 | Tanc1  | 311055 | 1,60 | down |
| 6201599 | 7227811 | 1442005 | tetratricopeptide repeat, ankyrin repeat and coiled-coil containing 1 | Tanc1  | 311055 | 1,46 | up   |
| 6226959 | 7227811 | 1442002 | tetratricopeptide repeat, ankyrin repeat and coiled-coil containing 1 | Tanc1  | 311055 | 1,04 | up   |
| 6236824 | 7227811 | 1442014 | tetratricopeptide repeat, ankyrin repeat and coiled-coil containing 1 | Tanc1  | 311055 | 1,43 | up   |
| 6245647 | 7227811 | 1442009 | tetratricopeptide repeat, ankyrin repeat and coiled-coil containing 1 | Tanc1  | 311055 | 1,00 | down |
| 6253061 | 7227811 | 1442013 | tetratricopeptide repeat, ankyrin repeat and coiled-coil containing 1 | Tanc1  | 311055 | 1,76 | up   |
| 6327563 | 7227811 | 1442007 | tetratricopeptide repeat, ankyrin repeat and coiled-coil containing 1 | Tanc1  | 311055 | 1,93 | down |
| 6352435 | 7227811 | 1441993 | tetratricopeptide repeat, ankyrin repeat and coiled-coil containing 1 | Tanc1  | 311055 | 1,09 | up   |
| 6374351 | 7227811 | 1442015 | tetratricopeptide repeat, ankyrin repeat and coiled-coil containing 1 | Tanc1  | 311055 | 1,57 | down |
| 6505909 | 7227811 | 1442010 | tetratricopeptide repeat, ankyrin repeat and coiled-coil containing 1 | Tanc1  | 311055 | 1,14 | up   |
| 6534986 | 7227811 | 1441997 | tetratricopeptide repeat, ankyrin repeat and coiled-coil containing 1 | Tanc1  | 311055 | 1,16 | up   |
| 6595357 | 7227811 | 1442000 | tetratricopeptide repeat, ankyrin repeat and coiled-coil containing 1 | Tanc1  | 311055 | 1,43 | up   |
| 6637132 | 7227811 | 1441998 | tetratricopeptide repeat, ankyrin repeat and coiled-coil containing 1 | Tanc1  | 311055 | 1,02 | down |
| 6654260 | 7227811 | 1442006 | tetratricopeptide repeat, ankyrin repeat and coiled-coil containing 1 | Tanc1  | 311055 | 1,35 | down |
| 6658167 | 7227811 | 1442008 | tetratricopeptide repeat, ankyrin repeat and coiled-coil containing 1 | Tanc1  | 311055 | 1,30 | down |
| 5675819 | 7366702 | 1785384 | TGFB-induced factor homeobox 1                                        | Tgif1  | 316742 | 1,39 | down |
| 5745533 | 7366702 | 1785386 | TGFB-induced factor homeobox 1                                        | Tgif1  | 316742 | 1,78 | down |
| 5994835 | 7366702 | 1785385 | TGFB-induced factor homeobox 1                                        | Tgif1  | 316742 | 2,08 | up   |
| 6350427 | 7366702 | 1785383 | TGFB-induced factor homeobox 1                                        | Tgif1  | 316742 | 1,19 | up   |
| 5888123 | 7384904 | 1831594 | three prime repair exonuclease 2                                      | Trex2  | 309275 | 1,10 | up   |
| 5910026 | 7384904 | 1831594 | three prime repair exonuclease 2                                      | Trex2  | 309275 | 1,12 | down |
| 5934851 | 7384904 | 1831594 | three prime repair exonuclease 2                                      | Trex2  | 309275 | 1,09 | up   |
| 6392078 | 7384904 | 1831595 | three prime repair exonuclease 2                                      | Trex2  | 309275 | 2,01 | down |
| 6737899 | 7384904 | 1831593 | three prime repair exonuclease 2                                      | Trex2  | 309275 | 1,03 | up   |
| 5635834 | 7032513 | 966959  | threonyl-tRNA synthetase-like 2                                       | Tarsl2 | 308701 | 1,70 | up   |
| 5666949 | 7032513 | 966956  | threonyl-tRNA synthetase-like 2                                       | Tarsl2 | 308701 | 1,01 | down |
| 5745700 | 7032513 | 966951  | threonyl-tRNA synthetase-like 2                                       | Tarsl2 | 308701 | 1,06 | down |
| 5751367 | 7032513 | 966949  | threonyl-tRNA synthetase-like 2                                       | Tarsl2 | 308701 | 1,66 | down |
| 5819190 | 7032513 | 966950  | threonyl-tRNA synthetase-like 2                                       | Tarsl2 | 308701 | 1,18 | up   |
| 5837558 | 7032513 | 966959  | threonyl-tRNA synthetase-like 2                                       | Tarsl2 | 308701 | 1,46 | up   |
| 5966614 | 7032513 | 966954  | threonyl-tRNA synthetase-like 2                                       | Tarsl2 | 308701 | 1,66 | up   |
| 5989013 | 7032513 | 966947  | threonyl-tRNA synthetase-like 2                                       | Tarsl2 | 308701 | 1,48 | up   |
| 6046793 | 7032513 | 966952  | threonyl-tRNA synthetase-like 2                                       | Tarsl2 | 308701 | 1,03 | up   |
| 6120350 | 7032513 | 966957  | threonyl-tRNA synthetase-like 2                                       | Tarsl2 | 308701 | 1,04 | down |
| 6242556 | 7032513 | 966947  | threonyl-tRNA synthetase-like 2                                       | Tarsl2 | 308701 | 1,26 | up   |
| 6341627 | 7032513 | 966949  | threonyl-tRNA synthetase-like 2                                       | Tarsl2 | 308701 | 1,04 | up   |
| 6370487 | 7032513 | 966958  | threonyl-tRNA synthetase-like 2                                       | Tarsl2 | 308701 | 2,11 | down |
| 6375656 | 7032513 | 966953  | threonyl-tRNA synthetase-like 2                                       | Tarsl2 | 308701 | 1,08 | up   |

|         |         |         |                                 |         |        |      |      |
|---------|---------|---------|---------------------------------|---------|--------|------|------|
| 6439267 | 7032513 | 966947  | threonyl-tRNA synthetase-like 2 | Tars12  | 308701 | 1,05 | up   |
| 6466631 | 7032513 | 966955  | threonyl-tRNA synthetase-like 2 | Tars12  | 308701 | 1,00 | down |
| 6639955 | 7032513 | 966948  | threonyl-tRNA synthetase-like 2 | Tars12  | 308701 | 1,72 | down |
| 5623086 | 7302887 | 1629160 | THUMP domain containing 2       | Thumpd2 | 313851 | 2,36 | down |
| 5653530 | 7302887 | 1629155 | THUMP domain containing 2       | Thumpd2 | 313851 | 1,36 | down |
| 5666951 | 7302887 | 1629156 | THUMP domain containing 2       | Thumpd2 | 313851 | 1,21 | up   |
| 5710322 | 7302887 | 1629159 | THUMP domain containing 2       | Thumpd2 | 313851 | 1,28 | down |
| 5719197 | 7302887 | 1629158 | THUMP domain containing 2       | Thumpd2 | 313851 | 1,03 | down |
| 5747672 | 7302887 | 1629155 | THUMP domain containing 2       | Thumpd2 | 313851 | 1,12 | up   |
| 5906056 | 7302887 | 1629163 | THUMP domain containing 2       | Thumpd2 | 313851 | 1,01 | down |
| 6014904 | 7302887 | 1629162 | THUMP domain containing 2       | Thumpd2 | 313851 | 1,24 | down |
| 6118683 | 7302887 | 1629156 | THUMP domain containing 2       | Thumpd2 | 313851 | 1,11 | up   |
| 6363550 | 7302887 | 1629161 | THUMP domain containing 2       | Thumpd2 | 313851 | 1,07 | down |
| 6629714 | 7302887 | 1629155 | THUMP domain containing 2       | Thumpd2 | 313851 | 1,46 | up   |
| 6668782 | 7302887 | 1629155 | THUMP domain containing 2       | Thumpd2 | 313851 | 1,05 | up   |
| 6670456 | 7302887 | 1629163 | THUMP domain containing 2       | Thumpd2 | 313851 | 2,69 | up   |
| 6703079 | 7302887 | 1629157 | THUMP domain containing 2       | Thumpd2 | 313851 | 1,44 | down |
| 5667965 | 7317714 | 1666860 | thyroglobulin                   | Tg      | 24826  | 1,23 | down |
| 5674415 | 7317714 | 1666874 | thyroglobulin                   | Tg      | 24826  | 1,16 | up   |
| 5703802 | 7317714 | 1666877 | thyroglobulin                   | Tg      | 24826  | 1,23 | down |
| 5730692 | 7317714 | 1666861 | thyroglobulin                   | Tg      | 24826  | 1,39 | down |
| 5794847 | 7317714 | 1666857 | thyroglobulin                   | Tg      | 24826  | 1,56 | up   |
| 5812251 | 7317714 | 1666880 | thyroglobulin                   | Tg      | 24826  | 1,34 | down |
| 5814336 | 7317714 | 1666867 | thyroglobulin                   | Tg      | 24826  | 1,01 | down |
| 5830771 | 7317714 | 1666895 | thyroglobulin                   | Tg      | 24826  | 1,85 | down |
| 5840168 | 7317714 | 1666898 | thyroglobulin                   | Tg      | 24826  | 1,19 | down |
| 5859542 | 7317714 | 1666869 | thyroglobulin                   | Tg      | 24826  | 1,42 | up   |
| 5867193 | 7317714 | 1666857 | thyroglobulin                   | Tg      | 24826  | 1,28 | up   |
| 5876919 | 7317714 | 1666870 | thyroglobulin                   | Tg      | 24826  | 1,54 | down |
| 5915634 | 7317714 | 1666878 | thyroglobulin                   | Tg      | 24826  | 1,13 | up   |
| 5919106 | 7317714 | 1666885 | thyroglobulin                   | Tg      | 24826  | 1,19 | up   |
| 5967480 | 7317714 | 1666872 | thyroglobulin                   | Tg      | 24826  | 1,28 | down |
| 5986900 | 7317714 | 1666858 | thyroglobulin                   | Tg      | 24826  | 1,05 | down |
| 6005489 | 7317714 | 1666882 | thyroglobulin                   | Tg      | 24826  | 1,09 | down |
| 6073921 | 7317714 | 1666851 | thyroglobulin                   | Tg      | 24826  | 1,44 | up   |
| 6079130 | 7317714 | 1666853 | thyroglobulin                   | Tg      | 24826  | 1,03 | up   |
| 6083429 | 7317714 | 1666861 | thyroglobulin                   | Tg      | 24826  | 1,15 | down |
| 6123058 | 7317714 | 1666852 | thyroglobulin                   | Tg      | 24826  | 1,91 | up   |
| 6140920 | 7317714 | 1666873 | thyroglobulin                   | Tg      | 24826  | 1,02 | down |
| 6153521 | 7317714 | 1666855 | thyroglobulin                   | Tg      | 24826  | 2,08 | down |
| 6179750 | 7317714 | 1666866 | thyroglobulin                   | Tg      | 24826  | 1,02 | up   |
| 6192114 | 7317714 | 1666868 | thyroglobulin                   | Tg      | 24826  | 1,31 | up   |
| 6195357 | 7317714 | 1666868 | thyroglobulin                   | Tg      | 24826  | 1,89 | up   |
| 6220943 | 7317714 | 1666854 | thyroglobulin                   | Tg      | 24826  | 1,07 | up   |
| 6224727 | 7317714 | 1666863 | thyroglobulin                   | Tg      | 24826  | 1,54 | down |
| 6232084 | 7317714 | 1666891 | thyroglobulin                   | Tg      | 24826  | 1,23 | down |
| 6243071 | 7317714 | 1666881 | thyroglobulin                   | Tg      | 24826  | 1,01 | up   |
| 6280110 | 7317714 | 1666892 | thyroglobulin                   | Tg      | 24826  | 1,39 | up   |
| 6287723 | 7317714 | 1666864 | thyroglobulin                   | Tg      | 24826  | 1,05 | down |
| 6298414 | 7317714 | 1666884 | thyroglobulin                   | Tg      | 24826  | 1,42 | down |
| 6308015 | 7317714 | 1666901 | thyroglobulin                   | Tg      | 24826  | 1,69 | up   |
| 6342750 | 7317714 | 1666886 | thyroglobulin                   | Tg      | 24826  | 1,18 | down |
| 6355483 | 7317714 | 1666875 | thyroglobulin                   | Tg      | 24826  | 3,06 | down |
| 6387029 | 7317714 | 1666856 | thyroglobulin                   | Tg      | 24826  | 1,25 | down |
| 6409053 | 7317714 | 1666889 | thyroglobulin                   | Tg      | 24826  | 1,13 | up   |
| 6425070 | 7317714 | 1666865 | thyroglobulin                   | Tg      | 24826  | 1,38 | up   |

|         |         |         |                                        |        |        |      |      |
|---------|---------|---------|----------------------------------------|--------|--------|------|------|
| 6452340 | 7317714 | 1666883 | thyroglobulin                          | Tg     | 24826  | 1,33 | down |
| 6507188 | 7317714 | 1666871 | thyroglobulin                          | Tg     | 24826  | 1,05 | up   |
| 6521501 | 7317714 | 1666876 | thyroglobulin                          | Tg     | 24826  | 1,05 | up   |
| 6526742 | 7317714 | 1666893 | thyroglobulin                          | Tg     | 24826  | 1,11 | up   |
| 6536387 | 7317714 | 1666887 | thyroglobulin                          | Tg     | 24826  | 1,04 | down |
| 6538960 | 7317714 | 1666894 | thyroglobulin                          | Tg     | 24826  | 1,16 | down |
| 6574858 | 7317714 | 1666890 | thyroglobulin                          | Tg     | 24826  | 1,18 | up   |
| 6579937 | 7317714 | 1666859 | thyroglobulin                          | Tg     | 24826  | 1,04 | down |
| 6585787 | 7317714 | 1666896 | thyroglobulin                          | Tg     | 24826  | 1,39 | up   |
| 6592377 | 7317714 | 1666861 | thyroglobulin                          | Tg     | 24826  | 1,23 | up   |
| 6617794 | 7317714 | 1666897 | thyroglobulin                          | Tg     | 24826  | 1,19 | up   |
| 6637017 | 7317714 | 1666862 | thyroglobulin                          | Tg     | 24826  | 1,14 | down |
| 6689033 | 7317714 | 1666900 | thyroglobulin                          | Tg     | 24826  | 1,32 | up   |
| 6691245 | 7317714 | 1666899 | thyroglobulin                          | Tg     | 24826  | 1,01 | down |
| 6700424 | 7317714 | 1666879 | thyroglobulin                          | Tg     | 24826  | 1,42 | down |
| 6728362 | 7317714 | 1666888 | thyroglobulin                          | Tg     | 24826  | 1,15 | down |
| 5680828 | 7071907 | 1060799 | thyroid hormone receptor alpha         | Thra   | 81812  | 1,44 | down |
| 5750615 | 7071907 | 1060801 | thyroid hormone receptor alpha         | Thra   | 81812  | 1,02 | down |
| 5885566 | 7071907 | 1060794 | thyroid hormone receptor alpha         | Thra   | 81812  | 1,30 | down |
| 5972436 | 7071907 | 1060802 | thyroid hormone receptor alpha         | Thra   | 81812  | 1,60 | up   |
| 6066464 | 7071907 | 1060793 | thyroid hormone receptor alpha         | Thra   | 81812  | 1,32 | up   |
| 6151492 | 7071907 | 1060802 | thyroid hormone receptor alpha         | Thra   | 81812  | 1,47 | down |
| 6173032 | 7071907 | 1060798 | thyroid hormone receptor alpha         | Thra   | 81812  | 1,16 | down |
| 6191838 | 7071907 | 1060800 | thyroid hormone receptor alpha         | Thra   | 81812  | 1,19 | down |
| 6283087 | 7071907 | 1060791 | thyroid hormone receptor alpha         | Thra   | 81812  | 1,09 | up   |
| 6518820 | 7071907 | 1060795 | thyroid hormone receptor alpha         | Thra   | 81812  | 1,01 | up   |
| 6545251 | 7071907 | 1060796 | thyroid hormone receptor alpha         | Thra   | 81812  | 1,01 | up   |
| 6588813 | 7071907 | 1060793 | thyroid hormone receptor alpha         | Thra   | 81812  | 2,21 | down |
| 6592518 | 7071907 | 1060792 | thyroid hormone receptor alpha         | Thra   | 81812  | 1,05 | up   |
| 6620584 | 7071907 | 1060797 | thyroid hormone receptor alpha         | Thra   | 81812  | 1,07 | up   |
| 6730975 | 7071907 | 1060800 | thyroid hormone receptor alpha         | Thra   | 81812  | 1,12 | up   |
| 5776778 | 7369031 | 1793007 | thyroid hormone receptor interactor 10 | Trip10 | 116717 | 1,29 | up   |
| 5854212 | 7369031 | 1793008 | thyroid hormone receptor interactor 10 | Trip10 | 116717 | 1,25 | down |
| 5873778 | 7369031 | 1793010 | thyroid hormone receptor interactor 10 | Trip10 | 116717 | 1,37 | up   |
| 5984121 | 7369031 | 1793016 | thyroid hormone receptor interactor 10 | Trip10 | 116717 | 1,16 | up   |
| 6048375 | 7369031 | 1793018 | thyroid hormone receptor interactor 10 | Trip10 | 116717 | 1,49 | down |
| 6116346 | 7369031 | 1793003 | thyroid hormone receptor interactor 10 | Trip10 | 116717 | 1,32 | down |
| 6163714 | 7369031 | 1793015 | thyroid hormone receptor interactor 10 | Trip10 | 116717 | 1,37 | up   |
| 6303605 | 7369031 | 1793018 | thyroid hormone receptor interactor 10 | Trip10 | 116717 | 1,26 | down |
| 6399559 | 7369031 | 1793014 | thyroid hormone receptor interactor 10 | Trip10 | 116717 | 1,25 | up   |
| 6439168 | 7369031 | 1793017 | thyroid hormone receptor interactor 10 | Trip10 | 116717 | 1,18 | down |
| 6465206 | 7369031 | 1793012 | thyroid hormone receptor interactor 10 | Trip10 | 116717 | 1,07 | down |
| 6483409 | 7369031 | 1793009 | thyroid hormone receptor interactor 10 | Trip10 | 116717 | 1,53 | up   |
| 6508763 | 7369031 | 1793006 | thyroid hormone receptor interactor 10 | Trip10 | 116717 | 1,21 | up   |
| 6526603 | 7369031 | 1793018 | thyroid hormone receptor interactor 10 | Trip10 | 116717 | 2,09 | down |
| 6546826 | 7369031 | 1793005 | thyroid hormone receptor interactor 10 | Trip10 | 116717 | 1,69 | up   |
| 5802036 | 7300596 | 1623397 | thyroid stimulating hormone receptor   | Tshr   | 25360  | 1,02 | up   |
| 5985938 | 7300596 | 1623402 | thyroid stimulating hormone receptor   | Tshr   | 25360  | 1,03 | down |
| 5989263 | 7300596 | 1623395 | thyroid stimulating hormone receptor   | Tshr   | 25360  | 2,11 | down |
| 6030775 | 7300596 | 1623400 | thyroid stimulating hormone receptor   | Tshr   | 25360  | 1,04 | down |
| 6151137 | 7300596 | 1623396 | thyroid stimulating hormone receptor   | Tshr   | 25360  | 1,25 | up   |
| 6173596 | 7300596 | 1623393 | thyroid stimulating hormone receptor   | Tshr   | 25360  | 1,08 | down |
| 6207665 | 7300596 | 1623393 | thyroid stimulating hormone receptor   | Tshr   | 25360  | 1,12 | down |
| 6237362 | 7300596 | 1623399 | thyroid stimulating hormone receptor   | Tshr   | 25360  | 1,03 | up   |
| 6429276 | 7300596 | 1623403 | thyroid stimulating hormone receptor   | Tshr   | 25360  | 1,13 | up   |
| 6438551 | 7300596 | 1623401 | thyroid stimulating hormone receptor   | Tshr   | 25360  | 1,30 | down |

|         |         |         |                                      |       |        |      |      |
|---------|---------|---------|--------------------------------------|-------|--------|------|------|
| 6550090 | 7300596 | 1623398 | thyroid stimulating hormone receptor | Tshr  | 25360  | 1,20 | up   |
| 6718765 | 7300596 | 1623394 | thyroid stimulating hormone receptor | Tshr  | 25360  | 1,33 | down |
| 5682320 | 7352046 | 1750038 | tight junction associated protein 1  | Tjap1 | 316233 | 1,06 | up   |
| 5685171 | 7352046 | 1750044 | tight junction associated protein 1  | Tjap1 | 316233 | 1,12 | up   |
| 5760579 | 7352046 | 1750028 | tight junction associated protein 1  | Tjap1 | 316233 | 1,50 | down |
| 5780713 | 7352046 | 1750031 | tight junction associated protein 1  | Tjap1 | 316233 | 1,15 | down |
| 5825377 | 7352046 | 1750044 | tight junction associated protein 1  | Tjap1 | 316233 | 1,06 | down |
| 5843654 | 7352046 | 1750040 | tight junction associated protein 1  | Tjap1 | 316233 | 1,36 | up   |
| 5898022 | 7352046 | 1750035 | tight junction associated protein 1  | Tjap1 | 316233 | 1,80 | down |
| 5906549 | 7352046 | 1750044 | tight junction associated protein 1  | Tjap1 | 316233 | 1,73 | up   |
| 5961630 | 7352046 | 1750034 | tight junction associated protein 1  | Tjap1 | 316233 | 1,27 | up   |
| 6014048 | 7352046 | 1750041 | tight junction associated protein 1  | Tjap1 | 316233 | 1,24 | down |
| 6024569 | 7352046 | 1750028 | tight junction associated protein 1  | Tjap1 | 316233 | 1,77 | down |
| 6040406 | 7352046 | 1750037 | tight junction associated protein 1  | Tjap1 | 316233 | 1,02 | down |
| 6262909 | 7352046 | 1750043 | tight junction associated protein 1  | Tjap1 | 316233 | 1,11 | down |
| 6417323 | 7352046 | 1750042 | tight junction associated protein 1  | Tjap1 | 316233 | 1,21 | down |
| 6651703 | 7352046 | 1750044 | tight junction associated protein 1  | Tjap1 | 316233 | 1,03 | down |
| 5632277 | 7312338 | 1652786 | tight junction protein 3             | Tjp3  | 314640 | 2,82 | down |
| 5697605 | 7312338 | 1652781 | tight junction protein 3             | Tjp3  | 314640 | 1,00 | up   |
| 5781638 | 7312338 | 1652782 | tight junction protein 3             | Tjp3  | 314640 | 1,11 | up   |
| 5795516 | 7312338 | 1652768 | tight junction protein 3             | Tjp3  | 314640 | 2,86 | down |
| 5815074 | 7312338 | 1652767 | tight junction protein 3             | Tjp3  | 314640 | 2,96 | down |
| 6041431 | 7312338 | 1652777 | tight junction protein 3             | Tjp3  | 314640 | 1,01 | up   |
| 6047931 | 7312338 | 1652780 | tight junction protein 3             | Tjp3  | 314640 | 1,02 | down |
| 6091241 | 7312338 | 1652778 | tight junction protein 3             | Tjp3  | 314640 | 1,40 | up   |
| 6181707 | 7312338 | 1652777 | tight junction protein 3             | Tjp3  | 314640 | 1,47 | up   |
| 6189499 | 7312338 | 1652775 | tight junction protein 3             | Tjp3  | 314640 | 1,19 | up   |
| 6247807 | 7312338 | 1652771 | tight junction protein 3             | Tjp3  | 314640 | 1,11 | down |
| 6289615 | 7312338 | 1652776 | tight junction protein 3             | Tjp3  | 314640 | 1,16 | down |
| 6318792 | 7312338 | 1652770 | tight junction protein 3             | Tjp3  | 314640 | 1,72 | up   |
| 6396142 | 7312338 | 1652785 | tight junction protein 3             | Tjp3  | 314640 | 1,18 | down |
| 6403398 | 7312338 | 1652783 | tight junction protein 3             | Tjp3  | 314640 | 1,07 | up   |
| 6423656 | 7312338 | 1652779 | tight junction protein 3             | Tjp3  | 314640 | 1,07 | down |
| 6511882 | 7312338 | 1652771 | tight junction protein 3             | Tjp3  | 314640 | 1,08 | up   |
| 6521168 | 7312338 | 1652773 | tight junction protein 3             | Tjp3  | 314640 | 1,01 | down |
| 6557028 | 7312338 | 1652769 | tight junction protein 3             | Tjp3  | 314640 | 1,08 | down |
| 6625086 | 7312338 | 1652787 | tight junction protein 3             | Tjp3  | 314640 | 1,76 | down |
| 6629346 | 7312338 | 1652784 | tight junction protein 3             | Tjp3  | 314640 | 1,55 | down |
| 6633768 | 7312338 | 1652774 | tight junction protein 3             | Tjp3  | 314640 | 1,75 | up   |
| 5716973 | 7379138 | 1818928 | TIMP metalloproteinase inhibitor 1   | Timp1 | 116510 | 1,03 | down |
| 5739506 | 7379138 | 1818929 | TIMP metalloproteinase inhibitor 1   | Timp1 | 116510 | 1,14 | down |
| 6144215 | 7379138 | 1818929 | TIMP metalloproteinase inhibitor 1   | Timp1 | 116510 | 1,33 | up   |
| 6164744 | 7379138 | 1818924 | TIMP metalloproteinase inhibitor 1   | Timp1 | 116510 | 5,45 | down |
| 6315878 | 7379138 | 1818927 | TIMP metalloproteinase inhibitor 1   | Timp1 | 116510 | 1,32 | up   |
| 6395478 | 7379138 | 1818925 | TIMP metalloproteinase inhibitor 1   | Timp1 | 116510 | 1,34 | up   |
| 6742490 | 7379138 | 1818926 | TIMP metalloproteinase inhibitor 1   | Timp1 | 116510 | 1,22 | up   |
| 5637734 | 7240569 | 1475441 | titin                                | Ttn   | 84015  | 1,56 | down |
| 5642040 | 7240569 | 1475428 | titin                                | Ttn   | 84015  | 1,12 | up   |
| 5671996 | 7240569 | 1475428 | titin                                | Ttn   | 84015  | 1,00 | down |
| 5723280 | 7240569 | 1475408 | titin                                | Ttn   | 84015  | 1,06 | down |
| 5757974 | 7240569 | 1475306 | titin                                | Ttn   | 84015  | 1,25 | up   |
| 5769298 | 7240569 | 1475414 | titin                                | Ttn   | 84015  | 1,22 | down |
| 5773398 | 7240569 | 1475413 | titin                                | Ttn   | 84015  | 1,21 | down |
| 5788584 | 7240569 | 1475392 | titin                                | Ttn   | 84015  | 1,06 | up   |
| 5810768 | 7240569 | 1475310 | titin                                | Ttn   | 84015  | 1,37 | up   |
| 5831786 | 7240569 | 1475309 | titin                                | Ttn   | 84015  | 1,16 | down |

|         |         |         |                               |        |        |      |      |
|---------|---------|---------|-------------------------------|--------|--------|------|------|
| 5834926 | 7240569 | 1475424 | titin                         | Ttn    | 84015  | 1,25 | up   |
| 5852833 | 7240569 | 1475409 | titin                         | Ttn    | 84015  | 1,49 | up   |
| 5883593 | 7240569 | 1475417 | titin                         | Ttn    | 84015  | 1,32 | up   |
| 5883814 | 7240569 | 1475416 | titin                         | Ttn    | 84015  | 1,14 | up   |
| 5952371 | 7240569 | 1475419 | titin                         | Ttn    | 84015  | 1,07 | down |
| 5963114 | 7240569 | 1475434 | titin                         | Ttn    | 84015  | 1,67 | up   |
| 5976243 | 7240569 | 1475406 | titin                         | Ttn    | 84015  | 1,08 | up   |
| 6010526 | 7240569 | 1475426 | titin                         | Ttn    | 84015  | 1,06 | down |
| 6013623 | 7240569 | 1475415 | titin                         | Ttn    | 84015  | 1,07 | up   |
| 6043164 | 7240569 | 1475435 | titin                         | Ttn    | 84015  | 1,01 | up   |
| 6061335 | 7240569 | 1475477 | titin                         | Ttn    | 84015  | 1,43 | up   |
| 6072039 | 7240569 | 1475467 | titin                         | Ttn    | 84015  | 1,49 | down |
| 6073009 | 7240569 | 1475391 | titin                         | Ttn    | 84015  | 1,12 | down |
| 6095602 | 7240569 | 1475425 | titin                         | Ttn    | 84015  | 1,06 | down |
| 6101607 | 7240569 | 1475432 | titin                         | Ttn    | 84015  | 1,13 | down |
| 6118324 | 7240569 | 1475431 | titin                         | Ttn    | 84015  | 1,42 | up   |
| 6155294 | 7240569 | 1475340 | titin                         | Ttn    | 84015  | 1,18 | up   |
| 6157429 | 7240569 | 1475305 | titin                         | Ttn    | 84015  | 1,92 | up   |
| 6162425 | 7240569 | 1475442 | titin                         | Ttn    | 84015  | 1,88 | down |
| 6168060 | 7240569 | 1475373 | titin                         | Ttn    | 84015  | 1,01 | up   |
| 6187035 | 7240569 | 1475421 | titin                         | Ttn    | 84015  | 1,08 | down |
| 6187370 | 7240569 | 1475411 | titin                         | Ttn    | 84015  | 1,02 | down |
| 6206245 | 7240569 | 1475439 | titin                         | Ttn    | 84015  | 1,43 | down |
| 6223146 | 7240569 | 1475374 | titin                         | Ttn    | 84015  | 1,02 | down |
| 6236639 | 7240569 | 1475431 | titin                         | Ttn    | 84015  | 1,41 | down |
| 6269080 | 7240569 | 1475426 | titin                         | Ttn    | 84015  | 1,07 | up   |
| 6269475 | 7240569 | 1475410 | titin                         | Ttn    | 84015  | 1,76 | down |
| 6271050 | 7240569 | 1475427 | titin                         | Ttn    | 84015  | 1,29 | down |
| 6284581 | 7240569 | 1475436 | titin                         | Ttn    | 84015  | 1,28 | up   |
| 6309845 | 7240569 | 1475307 | titin                         | Ttn    | 84015  | 1,88 | down |
| 6372851 | 7240569 | 1475433 | titin                         | Ttn    | 84015  | 1,39 | up   |
| 6406930 | 7240569 | 1475422 | titin                         | Ttn    | 84015  | 1,08 | up   |
| 6425827 | 7240569 | 1475440 | titin                         | Ttn    | 84015  | 1,03 | down |
| 6431157 | 7240569 | 1475437 | titin                         | Ttn    | 84015  | 1,08 | up   |
| 6438825 | 7240569 | 1475465 | titin                         | Ttn    | 84015  | 1,24 | up   |
| 6451737 | 7240569 | 1475398 | titin                         | Ttn    | 84015  | 1,21 | down |
| 6463813 | 7240569 | 1475426 | titin                         | Ttn    | 84015  | 1,05 | down |
| 6534420 | 7240569 | 1475304 | titin                         | Ttn    | 84015  | 1,05 | down |
| 6546184 | 7240569 | 1475422 | titin                         | Ttn    | 84015  | 1,41 | up   |
| 6566338 | 7240569 | 1475430 | titin                         | Ttn    | 84015  | 1,02 | down |
| 6574069 | 7240569 | 1475423 | titin                         | Ttn    | 84015  | 1,27 | down |
| 6621625 | 7240569 | 1475429 | titin                         | Ttn    | 84015  | 1,26 | down |
| 6632703 | 7240569 | 1475475 | titin                         | Ttn    | 84015  | 1,28 | down |
| 6639810 | 7240569 | 1475438 | titin                         | Ttn    | 84015  | 1,03 | up   |
| 6645344 | 7240569 | 1475430 | titin                         | Ttn    | 84015  | 1,12 | up   |
| 6645369 | 7240569 | 1475308 | titin                         | Ttn    | 84015  | 1,47 | down |
| 6693152 | 7240569 | 1475465 | titin                         | Ttn    | 84015  | 1,06 | down |
| 6700074 | 7240569 | 1475407 | titin                         | Ttn    | 84015  | 1,43 | up   |
| 6718484 | 7240569 | 1475467 | titin                         | Ttn    | 84015  | 1,17 | down |
| 6730367 | 7240569 | 1475436 | titin                         | Ttn    | 84015  | 1,14 | up   |
| 6731225 | 7240569 | 1475412 | titin                         | Ttn    | 84015  | 1,10 | down |
| 6738689 | 7240569 | 1475418 | titin                         | Ttn    | 84015  | 1,03 | down |
| 5813089 | 7055781 | 1022268 | TMEM9 domain family, member B | Tmem9b | 293415 | 1,06 | up   |
| 6070381 | 7055781 | 1022270 | TMEM9 domain family, member B | Tmem9b | 293415 | 1,27 | up   |
| 6141728 | 7055781 | 1022266 | TMEM9 domain family, member B | Tmem9b | 293415 | 1,05 | down |
| 6372519 | 7055781 | 1022265 | TMEM9 domain family, member B | Tmem9b | 293415 | 1,18 | down |

|         |         |         |                                                        |          |        |      |      |
|---------|---------|---------|--------------------------------------------------------|----------|--------|------|------|
| 6470802 | 7055781 | 1022267 | TMEM9 domain family, member B                          | Tmem9b   | 293415 | 1,05 | down |
| 6650607 | 7055781 | 1022265 | TMEM9 domain family, member B                          | Tmem9b   | 293415 | 1,22 | down |
| 5737586 | 7301895 | 1626718 | Tnf receptor-associated factor 3                       | Traf3    | 362788 | 1,12 | up   |
| 5772585 | 7301895 | 1626723 | Tnf receptor-associated factor 3                       | Traf3    | 362788 | 1,66 | down |
| 5799089 | 7301895 | 1626716 | Tnf receptor-associated factor 3                       | Traf3    | 362788 | 1,74 | up   |
| 5839990 | 7301895 | 1626720 | Tnf receptor-associated factor 3                       | Traf3    | 362788 | 1,58 | down |
| 5878055 | 7301895 | 1626723 | Tnf receptor-associated factor 3                       | Traf3    | 362788 | 1,03 | down |
| 6068639 | 7301895 | 1626710 | Tnf receptor-associated factor 3                       | Traf3    | 362788 | 1,00 | up   |
| 6224157 | 7301895 | 1626713 | Tnf receptor-associated factor 3                       | Traf3    | 362788 | 1,07 | down |
| 6270387 | 7301895 | 1626723 | Tnf receptor-associated factor 3                       | Traf3    | 362788 | 1,00 | down |
| 6426673 | 7301895 | 1626714 | Tnf receptor-associated factor 3                       | Traf3    | 362788 | 1,30 | up   |
| 6503750 | 7301895 | 1626715 | Tnf receptor-associated factor 3                       | Traf3    | 362788 | 1,15 | up   |
| 6540276 | 7301895 | 1626722 | Tnf receptor-associated factor 3                       | Traf3    | 362788 | 1,11 | down |
| 6616340 | 7301895 | 1626722 | Tnf receptor-associated factor 3                       | Traf3    | 362788 | 1,17 | down |
| 6649225 | 7301895 | 1626719 | Tnf receptor-associated factor 3                       | Traf3    | 362788 | 1,38 | down |
| 6743383 | 7301895 | 1626717 | Tnf receptor-associated factor 3                       | Traf3    | 362788 | 1,06 | down |
| 6744934 | 7301895 | 1626721 | Tnf receptor-associated factor 3                       | Traf3    | 362788 | 2,02 | down |
| 5796353 | 7175355 | 1313233 | toll-like receptor adaptor molecule 2                  | Ticam2   | 364867 | 1,64 | up   |
| 5908134 | 7175355 | 1313230 | toll-like receptor adaptor molecule 2                  | Ticam2   | 364867 | 1,84 | up   |
| 5935704 | 7175355 | 1313232 | toll-like receptor adaptor molecule 2                  | Ticam2   | 364867 | 1,57 | up   |
| 5972960 | 7175355 | 1313231 | toll-like receptor adaptor molecule 2                  | Ticam2   | 364867 | 1,88 | up   |
| 6203080 | 7175355 | 1313237 | toll-like receptor adaptor molecule 2                  | Ticam2   | 364867 | 1,04 | down |
| 6468804 | 7175355 | 1313236 | toll-like receptor adaptor molecule 2                  | Ticam2   | 364867 | 1,63 | up   |
| 6555498 | 7175355 | 1313237 | toll-like receptor adaptor molecule 2                  | Ticam2   | 364867 | 1,20 | up   |
| 5864607 | 7050641 | 1010957 | tonin                                                  | Ton      | 24841  | 1,14 | down |
| 5866231 | 7050641 | 1010958 | tonin                                                  | Ton      | 24841  | 1,08 | down |
| 5894341 | 7050641 | 1010962 | tonin                                                  | Ton      | 24841  | 1,01 | up   |
| 5938627 | 7050641 | 1010960 | tonin                                                  | Ton      | 24841  | 1,14 | up   |
| 6020894 | 7050641 | 1010958 | tonin                                                  | Ton      | 24841  | 1,30 | down |
| 6230616 | 7050641 | 1010962 | tonin                                                  | Ton      | 24841  | 2,03 | down |
| 6699917 | 7050641 | 1010959 | tonin                                                  | Ton      | 24841  | 1,45 | up   |
| 5644072 | 7234008 | 1458369 | TPX2, microtubule-associated, homolog (Xenopus laevis) | Tpx2     | 311546 | 1,60 | down |
| 5663287 | 7234008 | 1458367 | TPX2, microtubule-associated, homolog (Xenopus laevis) | Tpx2     | 311546 | 1,56 | down |
| 5689845 | 7234008 | 1458370 | TPX2, microtubule-associated, homolog (Xenopus laevis) | Tpx2     | 311546 | 1,04 | down |
| 5748011 | 7234008 | 1458364 | TPX2, microtubule-associated, homolog (Xenopus laevis) | Tpx2     | 311546 | 2,18 | up   |
| 5882184 | 7234008 | 1458362 | TPX2, microtubule-associated, homolog (Xenopus laevis) | Tpx2     | 311546 | 1,78 | down |
| 5921785 | 7234008 | 1458371 | TPX2, microtubule-associated, homolog (Xenopus laevis) | Tpx2     | 311546 | 1,13 | down |
| 5955124 | 7234008 | 1458357 | TPX2, microtubule-associated, homolog (Xenopus laevis) | Tpx2     | 311546 | 1,23 | up   |
| 5981718 | 7234008 | 1458376 | TPX2, microtubule-associated, homolog (Xenopus laevis) | Tpx2     | 311546 | 1,15 | down |
| 6021841 | 7234008 | 1458357 | TPX2, microtubule-associated, homolog (Xenopus laevis) | Tpx2     | 311546 | 1,69 | down |
| 6055081 | 7234008 | 1458376 | TPX2, microtubule-associated, homolog (Xenopus laevis) | Tpx2     | 311546 | 1,05 | down |
| 6138004 | 7234008 | 1458375 | TPX2, microtubule-associated, homolog (Xenopus laevis) | Tpx2     | 311546 | 1,16 | up   |
| 6160904 | 7234008 | 1458365 | TPX2, microtubule-associated, homolog (Xenopus laevis) | Tpx2     | 311546 | 1,20 | up   |
| 6163334 | 7234008 | 1458374 | TPX2, microtubule-associated, homolog (Xenopus laevis) | Tpx2     | 311546 | 1,32 | up   |
| 6190185 | 7234008 | 1458363 | TPX2, microtubule-associated, homolog (Xenopus laevis) | Tpx2     | 311546 | 1,46 | up   |
| 6204378 | 7234008 | 1458360 | TPX2, microtubule-associated, homolog (Xenopus laevis) | Tpx2     | 311546 | 1,45 | down |
| 6259657 | 7234008 | 1458372 | TPX2, microtubule-associated, homolog (Xenopus laevis) | Tpx2     | 311546 | 1,02 | up   |
| 6325858 | 7234008 | 1458374 | TPX2, microtubule-associated, homolog (Xenopus laevis) | Tpx2     | 311546 | 1,35 | down |
| 6459182 | 7234008 | 1458373 | TPX2, microtubule-associated, homolog (Xenopus laevis) | Tpx2     | 311546 | 1,11 | up   |
| 6473429 | 7234008 | 1458361 | TPX2, microtubule-associated, homolog (Xenopus laevis) | Tpx2     | 311546 | 1,57 | down |
| 6482390 | 7234008 | 1458375 | TPX2, microtubule-associated, homolog (Xenopus laevis) | Tpx2     | 311546 | 1,32 | up   |
| 6529472 | 7234008 | 1458366 | TPX2, microtubule-associated, homolog (Xenopus laevis) | Tpx2     | 311546 | 1,53 | down |
| 5635424 | 7219605 | 1422063 | Traf3 interacting protein 2                            | Traf3ip2 | 361857 | 1,12 | down |
| 5742321 | 7219605 | 1422073 | Traf3 interacting protein 2                            | Traf3ip2 | 361857 | 2,31 | up   |
| 5757840 | 7219605 | 1422057 | Traf3 interacting protein 2                            | Traf3ip2 | 361857 | 1,25 | down |
| 5864016 | 7219605 | 1422073 | Traf3 interacting protein 2                            | Traf3ip2 | 361857 | 1,69 | down |

|         |         |         |                                                      |          |        |      |      |
|---------|---------|---------|------------------------------------------------------|----------|--------|------|------|
| 5981350 | 7219605 | 1422057 | Traf3 interacting protein 2                          | Traf3ip2 | 361857 | 1,13 | up   |
| 6008345 | 7219605 | 1422063 | Traf3 interacting protein 2                          | Traf3ip2 | 361857 | 1,13 | down |
| 6038423 | 7219605 | 1422062 | Traf3 interacting protein 2                          | Traf3ip2 | 361857 | 1,18 | up   |
| 6121859 | 7219605 | 1422066 | Traf3 interacting protein 2                          | Traf3ip2 | 361857 | 1,23 | up   |
| 6203094 | 7219605 | 1422078 | Traf3 interacting protein 2                          | Traf3ip2 | 361857 | 1,15 | up   |
| 6216119 | 7219605 | 1422077 | Traf3 interacting protein 2                          | Traf3ip2 | 361857 | 1,01 | up   |
| 6251332 | 7219605 | 1422070 | Traf3 interacting protein 2                          | Traf3ip2 | 361857 | 1,55 | up   |
| 6414727 | 7219605 | 1422053 | Traf3 interacting protein 2                          | Traf3ip2 | 361857 | 1,16 | down |
| 6493661 | 7219605 | 1422078 | Traf3 interacting protein 2                          | Traf3ip2 | 361857 | 1,08 | down |
| 6672019 | 7219605 | 1422069 | Traf3 interacting protein 2                          | Traf3ip2 | 361857 | 1,13 | down |
| 5625007 | 7228848 | 1444756 | trans-acting transcription factor 9                  | Sp9      | 366078 | 1,29 | up   |
| 5805311 | 7228848 | 1444757 | trans-acting transcription factor 9                  | Sp9      | 366078 | 1,00 | up   |
| 6076896 | 7228848 | 1444754 | trans-acting transcription factor 9                  | Sp9      | 366078 | 1,03 | down |
| 6408557 | 7228848 | 1444755 | trans-acting transcription factor 9                  | Sp9      | 366078 | 1,09 | down |
| 6051001 | 7233923 | 1458166 | transcription factor 15                              | Tcf15    | 296272 | 1,53 | up   |
| 5635124 | 7171780 | 1304084 | transcription factor 4                               | Tcf4     | 84382  | 1,16 | up   |
| 5708039 | 7171780 | 1304091 | transcription factor 4                               | Tcf4     | 84382  | 1,40 | up   |
| 5720362 | 7171780 | 1304079 | transcription factor 4                               | Tcf4     | 84382  | 2,46 | up   |
| 5777417 | 7171780 | 1304086 | transcription factor 4                               | Tcf4     | 84382  | 1,36 | down |
| 5859272 | 7171780 | 1304078 | transcription factor 4                               | Tcf4     | 84382  | 1,10 | down |
| 5913124 | 7171780 | 1304092 | transcription factor 4                               | Tcf4     | 84382  | 1,50 | up   |
| 5913273 | 7171780 | 1304093 | transcription factor 4                               | Tcf4     | 84382  | 1,26 | down |
| 5983706 | 7171780 | 1304081 | transcription factor 4                               | Tcf4     | 84382  | 1,16 | down |
| 5990331 | 7171780 | 1304079 | transcription factor 4                               | Tcf4     | 84382  | 1,13 | down |
| 6061211 | 7171780 | 1304089 | transcription factor 4                               | Tcf4     | 84382  | 1,01 | down |
| 6097583 | 7171780 | 1304085 | transcription factor 4                               | Tcf4     | 84382  | 1,04 | down |
| 6263347 | 7171780 | 1304088 | transcription factor 4                               | Tcf4     | 84382  | 1,18 | up   |
| 6386780 | 7171780 | 1304087 | transcription factor 4                               | Tcf4     | 84382  | 1,12 | up   |
| 6403160 | 7171780 | 1304083 | transcription factor 4                               | Tcf4     | 84382  | 1,05 | down |
| 6562995 | 7171780 | 1304082 | transcription factor 4                               | Tcf4     | 84382  | 1,02 | up   |
| 6716959 | 7171780 | 1304090 | transcription factor 4                               | Tcf4     | 84382  | 1,13 | down |
| 6724487 | 7171780 | 1304080 | transcription factor 4                               | Tcf4     | 84382  | 1,04 | up   |
| 5731961 | 7359426 | 1768353 | transcription factor EB                              | Tfeb     | 316214 | 1,21 | up   |
| 5740464 | 7359426 | 1768362 | transcription factor EB                              | Tfeb     | 316214 | 1,08 | down |
| 5882265 | 7359426 | 1768358 | transcription factor EB                              | Tfeb     | 316214 | 1,17 | up   |
| 5980634 | 7359426 | 1768361 | transcription factor EB                              | Tfeb     | 316214 | 1,02 | up   |
| 6031972 | 7359426 | 1768353 | transcription factor EB                              | Tfeb     | 316214 | 1,02 | up   |
| 6137715 | 7359426 | 1768362 | transcription factor EB                              | Tfeb     | 316214 | 1,08 | down |
| 6164770 | 7359426 | 1768353 | transcription factor EB                              | Tfeb     | 316214 | 1,07 | down |
| 6176798 | 7359426 | 1768362 | transcription factor EB                              | Tfeb     | 316214 | 1,02 | down |
| 6218975 | 7359426 | 1768357 | transcription factor EB                              | Tfeb     | 316214 | 2,97 | down |
| 6231486 | 7359426 | 1768355 | transcription factor EB                              | Tfeb     | 316214 | 1,38 | up   |
| 6286960 | 7359426 | 1768355 | transcription factor EB                              | Tfeb     | 316214 | 1,22 | down |
| 6350131 | 7359426 | 1768353 | transcription factor EB                              | Tfeb     | 316214 | 1,03 | down |
| 6395428 | 7359426 | 1768364 | transcription factor EB                              | Tfeb     | 316214 | 1,14 | up   |
| 6424206 | 7359426 | 1768363 | transcription factor EB                              | Tfeb     | 316214 | 1,22 | down |
| 6476467 | 7359426 | 1768360 | transcription factor EB                              | Tfeb     | 316214 | 1,25 | up   |
| 6560960 | 7359426 | 1768359 | transcription factor EB                              | Tfeb     | 316214 | 1,02 | down |
| 5662127 | 7107421 | 1145562 | transcriptional adaptor 1 (HFI1 homolog, yeast) like | Tada11   | 360874 | 1,06 | down |
| 5679290 | 7107421 | 1145569 | transcriptional adaptor 1 (HFI1 homolog, yeast) like | Tada11   | 360874 | 1,24 | down |
| 5720588 | 7107421 | 1145565 | transcriptional adaptor 1 (HFI1 homolog, yeast) like | Tada11   | 360874 | 1,18 | down |
| 5761501 | 7107421 | 1145563 | transcriptional adaptor 1 (HFI1 homolog, yeast) like | Tada11   | 360874 | 1,42 | up   |
| 5823532 | 7107421 | 1145564 | transcriptional adaptor 1 (HFI1 homolog, yeast) like | Tada11   | 360874 | 1,08 | up   |
| 6138420 | 7107421 | 1145566 | transcriptional adaptor 1 (HFI1 homolog, yeast) like | Tada11   | 360874 | 1,00 | down |
| 6154758 | 7107421 | 1145567 | transcriptional adaptor 1 (HFI1 homolog, yeast) like | Tada11   | 360874 | 2,37 | up   |
| 6193794 | 7107421 | 1145568 | transcriptional adaptor 1 (HFI1 homolog, yeast) like | Tada11   | 360874 | 1,15 | down |

|         |         |         |                                                        |        |        |      |      |
|---------|---------|---------|--------------------------------------------------------|--------|--------|------|------|
| 6246805 | 7107421 | 1145569 | transcriptional adaptor 1 (HFI1 homolog, yeast) like   | Tada11 | 360874 | 1,08 | down |
| 6397437 | 7107421 | 1145567 | transcriptional adaptor 1 (HFI1 homolog, yeast) like   | Tada11 | 360874 | 1,09 | down |
| 6457648 | 7107421 | 1145569 | transcriptional adaptor 1 (HFI1 homolog, yeast) like   | Tada11 | 360874 | 1,08 | up   |
| 5709075 | 7094158 | 1112965 | transferrin receptor                                   | Tfrc   | 64678  | 1,07 | up   |
| 5750427 | 7094158 | 1112977 | transferrin receptor                                   | Tfrc   | 64678  | 1,12 | down |
| 5787004 | 7094158 | 1112967 | transferrin receptor                                   | Tfrc   | 64678  | 1,15 | up   |
| 5826456 | 7094158 | 1112965 | transferrin receptor                                   | Tfrc   | 64678  | 1,07 | down |
| 6067776 | 7094158 | 1112983 | transferrin receptor                                   | Tfrc   | 64678  | 1,64 | up   |
| 6073866 | 7094158 | 1112975 | transferrin receptor                                   | Tfrc   | 64678  | 1,03 | up   |
| 6143381 | 7094158 | 1112976 | transferrin receptor                                   | Tfrc   | 64678  | 1,35 | up   |
| 6197333 | 7094158 | 1112969 | transferrin receptor                                   | Tfrc   | 64678  | 1,08 | down |
| 6245662 | 7094158 | 1112980 | transferrin receptor                                   | Tfrc   | 64678  | 1,10 | up   |
| 6262138 | 7094158 | 1112984 | transferrin receptor                                   | Tfrc   | 64678  | 2,65 | down |
| 6285408 | 7094158 | 1112968 | transferrin receptor                                   | Tfrc   | 64678  | 1,10 | down |
| 6345050 | 7094158 | 1112976 | transferrin receptor                                   | Tfrc   | 64678  | 1,01 | up   |
| 6371980 | 7094158 | 1112972 | transferrin receptor                                   | Tfrc   | 64678  | 1,34 | down |
| 6432117 | 7094158 | 1112971 | transferrin receptor                                   | Tfrc   | 64678  | 1,01 | up   |
| 6487838 | 7094158 | 1112966 | transferrin receptor                                   | Tfrc   | 64678  | 1,15 | up   |
| 6592763 | 7094158 | 1112979 | transferrin receptor                                   | Tfrc   | 64678  | 1,09 | down |
| 6681836 | 7094158 | 1112974 | transferrin receptor                                   | Tfrc   | 64678  | 1,14 | up   |
| 6687990 | 7094158 | 1112978 | transferrin receptor                                   | Tfrc   | 64678  | 1,24 | down |
| 6709269 | 7094158 | 1112973 | transferrin receptor                                   | Tfrc   | 64678  | 1,06 | up   |
| 5631259 | 7097240 | 1120370 | transferrin receptor 2                                 | Tfr2   | 288562 | 1,11 | up   |
| 5651491 | 7097240 | 1120364 | transferrin receptor 2                                 | Tfr2   | 288562 | 2,26 | up   |
| 5659917 | 7097240 | 1120357 | transferrin receptor 2                                 | Tfr2   | 288562 | 1,14 | down |
| 5661000 | 7097240 | 1120355 | transferrin receptor 2                                 | Tfr2   | 288562 | 1,06 | down |
| 5681004 | 7097240 | 1120364 | transferrin receptor 2                                 | Tfr2   | 288562 | 1,07 | down |
| 5686507 | 7097240 | 1120368 | transferrin receptor 2                                 | Tfr2   | 288562 | 1,30 | up   |
| 5708094 | 7097240 | 1120364 | transferrin receptor 2                                 | Tfr2   | 288562 | 1,99 | up   |
| 5825016 | 7097240 | 1120369 | transferrin receptor 2                                 | Tfr2   | 288562 | 1,06 | up   |
| 5830208 | 7097240 | 1120368 | transferrin receptor 2                                 | Tfr2   | 288562 | 1,07 | up   |
| 5831829 | 7097240 | 1120359 | transferrin receptor 2                                 | Tfr2   | 288562 | 1,35 | up   |
| 5964610 | 7097240 | 1120365 | transferrin receptor 2                                 | Tfr2   | 288562 | 1,02 | down |
| 5991339 | 7097240 | 1120363 | transferrin receptor 2                                 | Tfr2   | 288562 | 1,39 | down |
| 6080884 | 7097240 | 1120361 | transferrin receptor 2                                 | Tfr2   | 288562 | 1,04 | down |
| 6104951 | 7097240 | 1120362 | transferrin receptor 2                                 | Tfr2   | 288562 | 1,05 | up   |
| 6120774 | 7097240 | 1120367 | transferrin receptor 2                                 | Tfr2   | 288562 | 1,52 | down |
| 6185655 | 7097240 | 1120371 | transferrin receptor 2                                 | Tfr2   | 288562 | 1,10 | down |
| 6301274 | 7097240 | 1120358 | transferrin receptor 2                                 | Tfr2   | 288562 | 1,23 | down |
| 6344380 | 7097240 | 1120360 | transferrin receptor 2                                 | Tfr2   | 288562 | 1,35 | up   |
| 6468965 | 7097240 | 1120365 | transferrin receptor 2                                 | Tfr2   | 288562 | 1,55 | down |
| 6516888 | 7097240 | 1120356 | transferrin receptor 2                                 | Tfr2   | 288562 | 1,31 | down |
| 6694904 | 7097240 | 1120371 | transferrin receptor 2                                 | Tfr2   | 288562 | 1,17 | down |
| 5634752 | 7100257 | 1128279 | transformation/transcription domain-associated protein | Trrap  | 288471 | 1,31 | up   |
| 5638388 | 7100257 | 1128275 | transformation/transcription domain-associated protein | Trrap  | 288471 | 1,57 | down |
| 5676318 | 7100257 | 1128283 | transformation/transcription domain-associated protein | Trrap  | 288471 | 1,04 | up   |
| 5679136 | 7100257 | 1128265 | transformation/transcription domain-associated protein | Trrap  | 288471 | 1,05 | down |
| 5738274 | 7100257 | 1128268 | transformation/transcription domain-associated protein | Trrap  | 288471 | 1,25 | down |
| 5738370 | 7100257 | 1128263 | transformation/transcription domain-associated protein | Trrap  | 288471 | 1,15 | up   |
| 5749435 | 7100257 | 1128286 | transformation/transcription domain-associated protein | Trrap  | 288471 | 1,00 | up   |
| 5784552 | 7100257 | 1128221 | transformation/transcription domain-associated protein | Trrap  | 288471 | 1,02 | up   |
| 5800687 | 7100257 | 1128235 | transformation/transcription domain-associated protein | Trrap  | 288471 | 1,15 | up   |
| 5803881 | 7100257 | 1128217 | transformation/transcription domain-associated protein | Trrap  | 288471 | 1,20 | down |
| 5831929 | 7100257 | 1128277 | transformation/transcription domain-associated protein | Trrap  | 288471 | 1,15 | down |
| 5846831 | 7100257 | 1128233 | transformation/transcription domain-associated protein | Trrap  | 288471 | 1,07 | up   |
| 5846832 | 7100257 | 1128225 | transformation/transcription domain-associated protein | Trrap  | 288471 | 1,11 | down |



|         |         |         |                                                        |       |        |      |      |
|---------|---------|---------|--------------------------------------------------------|-------|--------|------|------|
| 5849534 | 7100257 | 1128250 | transformation/transcription domain-associated protein | Trrap | 288471 | 1,01 | up   |
| 5855818 | 7100257 | 1128237 | transformation/transcription domain-associated protein | Trrap | 288471 | 1,09 | up   |
| 5861072 | 7100257 | 1128261 | transformation/transcription domain-associated protein | Trrap | 288471 | 1,04 | down |
| 5866531 | 7100257 | 1128290 | transformation/transcription domain-associated protein | Trrap | 288471 | 1,33 | up   |
| 5872944 | 7100257 | 1128244 | transformation/transcription domain-associated protein | Trrap | 288471 | 1,02 | up   |
| 5890438 | 7100257 | 1128292 | transformation/transcription domain-associated protein | Trrap | 288471 | 1,04 | down |
| 5890707 | 7100257 | 1128252 | transformation/transcription domain-associated protein | Trrap | 288471 | 1,03 | down |
| 5902237 | 7100257 | 1128226 | transformation/transcription domain-associated protein | Trrap | 288471 | 1,11 | down |
| 5914752 | 7100257 | 1128279 | transformation/transcription domain-associated protein | Trrap | 288471 | 1,12 | up   |
| 5955951 | 7100257 | 1128285 | transformation/transcription domain-associated protein | Trrap | 288471 | 1,03 | up   |
| 5973124 | 7100257 | 1128281 | transformation/transcription domain-associated protein | Trrap | 288471 | 1,01 | up   |
| 6003421 | 7100257 | 1128257 | transformation/transcription domain-associated protein | Trrap | 288471 | 1,08 | up   |
| 6013671 | 7100257 | 1128282 | transformation/transcription domain-associated protein | Trrap | 288471 | 1,01 | down |
| 6055370 | 7100257 | 1128267 | transformation/transcription domain-associated protein | Trrap | 288471 | 1,10 | up   |
| 6058652 | 7100257 | 1128253 | transformation/transcription domain-associated protein | Trrap | 288471 | 1,02 | up   |
| 6065980 | 7100257 | 1128272 | transformation/transcription domain-associated protein | Trrap | 288471 | 1,23 | up   |
| 6085649 | 7100257 | 1128271 | transformation/transcription domain-associated protein | Trrap | 288471 | 1,03 | up   |
| 6115227 | 7100257 | 1128284 | transformation/transcription domain-associated protein | Trrap | 288471 | 1,02 | down |
| 6144709 | 7100257 | 1128234 | transformation/transcription domain-associated protein | Trrap | 288471 | 1,57 | down |
| 6146320 | 7100257 | 1128228 | transformation/transcription domain-associated protein | Trrap | 288471 | 1,10 | up   |
| 6151693 | 7100257 | 1128231 | transformation/transcription domain-associated protein | Trrap | 288471 | 1,02 | up   |
| 6157633 | 7100257 | 1128293 | transformation/transcription domain-associated protein | Trrap | 288471 | 1,02 | down |
| 6164025 | 7100257 | 1128276 | transformation/transcription domain-associated protein | Trrap | 288471 | 1,57 | up   |
| 6180827 | 7100257 | 1128230 | transformation/transcription domain-associated protein | Trrap | 288471 | 1,00 | up   |
| 6181278 | 7100257 | 1128248 | transformation/transcription domain-associated protein | Trrap | 288471 | 1,51 | down |
| 6196846 | 7100257 | 1128222 | transformation/transcription domain-associated protein | Trrap | 288471 | 1,14 | up   |
| 6225014 | 7100257 | 1128227 | transformation/transcription domain-associated protein | Trrap | 288471 | 1,21 | down |
| 6237760 | 7100257 | 1128243 | transformation/transcription domain-associated protein | Trrap | 288471 | 1,05 | up   |
| 6257420 | 7100257 | 1128256 | transformation/transcription domain-associated protein | Trrap | 288471 | 1,38 | up   |
| 6260506 | 7100257 | 1128219 | transformation/transcription domain-associated protein | Trrap | 288471 | 1,22 | up   |
| 6261194 | 7100257 | 1128238 | transformation/transcription domain-associated protein | Trrap | 288471 | 1,11 | up   |
| 6275543 | 7100257 | 1128217 | transformation/transcription domain-associated protein | Trrap | 288471 | 1,46 | down |
| 6281050 | 7100257 | 1128287 | transformation/transcription domain-associated protein | Trrap | 288471 | 1,78 | up   |
| 6292294 | 7100257 | 1128247 | transformation/transcription domain-associated protein | Trrap | 288471 | 1,21 | up   |
| 6297347 | 7100257 | 1128266 | transformation/transcription domain-associated protein | Trrap | 288471 | 1,05 | up   |
| 6301127 | 7100257 | 1128255 | transformation/transcription domain-associated protein | Trrap | 288471 | 1,08 | down |
| 6304741 | 7100257 | 1128236 | transformation/transcription domain-associated protein | Trrap | 288471 | 1,02 | down |
| 6311767 | 7100257 | 1128240 | transformation/transcription domain-associated protein | Trrap | 288471 | 1,09 | down |
| 6332951 | 7100257 | 1128284 | transformation/transcription domain-associated protein | Trrap | 288471 | 1,12 | up   |
| 6334916 | 7100257 | 1128269 | transformation/transcription domain-associated protein | Trrap | 288471 | 1,01 | up   |
| 6338922 | 7100257 | 1128232 | transformation/transcription domain-associated protein | Trrap | 288471 | 1,50 | up   |
| 6347400 | 7100257 | 1128262 | transformation/transcription domain-associated protein | Trrap | 288471 | 1,01 | down |
| 6370796 | 7100257 | 1128264 | transformation/transcription domain-associated protein | Trrap | 288471 | 1,12 | up   |
| 6374573 | 7100257 | 1128254 | transformation/transcription domain-associated protein | Trrap | 288471 | 1,38 | up   |
| 6391186 | 7100257 | 1128274 | transformation/transcription domain-associated protein | Trrap | 288471 | 1,02 | down |
| 6397739 | 7100257 | 1128242 | transformation/transcription domain-associated protein | Trrap | 288471 | 1,03 | down |
| 6401199 | 7100257 | 1128251 | transformation/transcription domain-associated protein | Trrap | 288471 | 1,06 | down |
| 6431920 | 7100257 | 1128291 | transformation/transcription domain-associated protein | Trrap | 288471 | 1,13 | down |
| 6466848 | 7100257 | 1128239 | transformation/transcription domain-associated protein | Trrap | 288471 | 1,01 | up   |
| 6548465 | 7100257 | 1128246 | transformation/transcription domain-associated protein | Trrap | 288471 | 1,00 | up   |
| 6553269 | 7100257 | 1128245 | transformation/transcription domain-associated protein | Trrap | 288471 | 1,06 | up   |
| 6561875 | 7100257 | 1128251 | transformation/transcription domain-associated protein | Trrap | 288471 | 1,11 | up   |
| 6563424 | 7100257 | 1128273 | transformation/transcription domain-associated protein | Trrap | 288471 | 1,23 | up   |
| 6565723 | 7100257 | 1128270 | transformation/transcription domain-associated protein | Trrap | 288471 | 1,11 | down |
| 6577986 | 7100257 | 1128288 | transformation/transcription domain-associated protein | Trrap | 288471 | 1,08 | down |
| 6593980 | 7100257 | 1128275 | transformation/transcription domain-associated protein | Trrap | 288471 | 1,04 | up   |

|         |         |         |                                                        |         |        |      |      |
|---------|---------|---------|--------------------------------------------------------|---------|--------|------|------|
| 6603806 | 7100257 | 1128249 | transformation/transcription domain-associated protein | Trrap   | 288471 | 1,14 | down |
| 6643683 | 7100257 | 1128289 | transformation/transcription domain-associated protein | Trrap   | 288471 | 1,21 | up   |
| 6657646 | 7100257 | 1128229 | transformation/transcription domain-associated protein | Trrap   | 288471 | 1,06 | up   |
| 6688802 | 7100257 | 1128218 | transformation/transcription domain-associated protein | Trrap   | 288471 | 1,29 | down |
| 6704937 | 7100257 | 1128258 | transformation/transcription domain-associated protein | Trrap   | 288471 | 1,04 | up   |
| 6724511 | 7100257 | 1128223 | transformation/transcription domain-associated protein | Trrap   | 288471 | 1,19 | down |
| 5687677 | 7037235 | 978578  | transforming growth factor beta 1 induced transcript 1 | Tgfb1l1 | 84574  | 1,19 | down |
| 5694983 | 7037235 | 978578  | transforming growth factor beta 1 induced transcript 1 | Tgfb1l1 | 84574  | 1,30 | down |
| 6062968 | 7037235 | 978577  | transforming growth factor beta 1 induced transcript 1 | Tgfb1l1 | 84574  | 1,12 | down |
| 6315619 | 7037235 | 978580  | transforming growth factor beta 1 induced transcript 1 | Tgfb1l1 | 84574  | 1,45 | down |
| 6316958 | 7037235 | 978582  | transforming growth factor beta 1 induced transcript 1 | Tgfb1l1 | 84574  | 1,94 | up   |
| 6328914 | 7037235 | 978581  | transforming growth factor beta 1 induced transcript 1 | Tgfb1l1 | 84574  | 1,36 | up   |
| 6646859 | 7037235 | 978579  | transforming growth factor beta 1 induced transcript 1 | Tgfb1l1 | 84574  | 1,83 | down |
| 5770630 | 7115195 | 1165149 | transforming growth factor, beta 2                     | Tgfb2   | 81809  | 1,10 | up   |
| 5923647 | 7115195 | 1165151 | transforming growth factor, beta 2                     | Tgfb2   | 81809  | 2,05 | up   |
| 5955561 | 7115195 | 1165145 | transforming growth factor, beta 2                     | Tgfb2   | 81809  | 2,07 | up   |
| 6104289 | 7115195 | 1165150 | transforming growth factor, beta 2                     | Tgfb2   | 81809  | 1,48 | down |
| 6111596 | 7115195 | 1165145 | transforming growth factor, beta 2                     | Tgfb2   | 81809  | 1,48 | down |
| 6253792 | 7115195 | 1165150 | transforming growth factor, beta 2                     | Tgfb2   | 81809  | 1,00 | up   |
| 6350412 | 7115195 | 1165147 | transforming growth factor, beta 2                     | Tgfb2   | 81809  | 1,07 | up   |
| 6697051 | 7115195 | 1165146 | transforming growth factor, beta 2                     | Tgfb2   | 81809  | 1,22 | up   |
| 6700234 | 7115195 | 1165148 | transforming growth factor, beta 2                     | Tgfb2   | 81809  | 1,12 | down |
| 6742922 | 7115195 | 1165152 | transforming growth factor, beta 2                     | Tgfb2   | 81809  | 1,17 | up   |
| 5655778 | 7146933 | 1243057 | transforming, acidic coiled-coil containing protein 1  | Tacc1   | 306562 | 1,26 | down |
| 5756549 | 7146933 | 1243058 | transforming, acidic coiled-coil containing protein 1  | Tacc1   | 306562 | 1,11 | up   |
| 5776339 | 7146933 | 1243054 | transforming, acidic coiled-coil containing protein 1  | Tacc1   | 306562 | 1,19 | up   |
| 5816133 | 7146933 | 1243047 | transforming, acidic coiled-coil containing protein 1  | Tacc1   | 306562 | 1,05 | down |
| 5864212 | 7146933 | 1243056 | transforming, acidic coiled-coil containing protein 1  | Tacc1   | 306562 | 1,90 | up   |
| 5907223 | 7146933 | 1243050 | transforming, acidic coiled-coil containing protein 1  | Tacc1   | 306562 | 1,39 | down |
| 5974888 | 7146933 | 1243059 | transforming, acidic coiled-coil containing protein 1  | Tacc1   | 306562 | 1,33 | up   |
| 6139879 | 7146933 | 1243048 | transforming, acidic coiled-coil containing protein 1  | Tacc1   | 306562 | 1,22 | down |
| 6263612 | 7146933 | 1243055 | transforming, acidic coiled-coil containing protein 1  | Tacc1   | 306562 | 1,18 | up   |
| 6302021 | 7146933 | 1243047 | transforming, acidic coiled-coil containing protein 1  | Tacc1   | 306562 | 1,47 | up   |
| 6313755 | 7146933 | 1243047 | transforming, acidic coiled-coil containing protein 1  | Tacc1   | 306562 | 1,17 | down |
| 6315627 | 7146933 | 1243047 | transforming, acidic coiled-coil containing protein 1  | Tacc1   | 306562 | 1,03 | down |
| 6319942 | 7146933 | 1243047 | transforming, acidic coiled-coil containing protein 1  | Tacc1   | 306562 | 1,06 | down |
| 6325763 | 7146933 | 1243049 | transforming, acidic coiled-coil containing protein 1  | Tacc1   | 306562 | 1,97 | up   |
| 6371164 | 7146933 | 1243051 | transforming, acidic coiled-coil containing protein 1  | Tacc1   | 306562 | 2,15 | down |
| 6489035 | 7146933 | 1243047 | transforming, acidic coiled-coil containing protein 1  | Tacc1   | 306562 | 1,06 | up   |
| 6498908 | 7146933 | 1243053 | transforming, acidic coiled-coil containing protein 1  | Tacc1   | 306562 | 1,20 | down |
| 6517600 | 7146933 | 1243046 | transforming, acidic coiled-coil containing protein 1  | Tacc1   | 306562 | 1,02 | up   |
| 6557655 | 7146933 | 1243047 | transforming, acidic coiled-coil containing protein 1  | Tacc1   | 306562 | 1,16 | down |
| 6591786 | 7146933 | 1243052 | transforming, acidic coiled-coil containing protein 1  | Tacc1   | 306562 | 1,07 | up   |
| 6660173 | 7146933 | 1243045 | transforming, acidic coiled-coil containing protein 1  | Tacc1   | 306562 | 1,37 | up   |
| 6674175 | 7146933 | 1243045 | transforming, acidic coiled-coil containing protein 1  | Tacc1   | 306562 | 1,25 | up   |
| 6674692 | 7146933 | 1243044 | transforming, acidic coiled-coil containing protein 1  | Tacc1   | 306562 | 1,28 | up   |
| 5641742 | 7127390 | 1195044 | transforming, acidic coiled-coil containing protein 3  | Tacc3   | 360962 | 1,22 | up   |
| 5662671 | 7127390 | 1195050 | transforming, acidic coiled-coil containing protein 3  | Tacc3   | 360962 | 1,59 | up   |
| 5780389 | 7127390 | 1195046 | transforming, acidic coiled-coil containing protein 3  | Tacc3   | 360962 | 1,22 | down |
| 5846211 | 7127390 | 1195054 | transforming, acidic coiled-coil containing protein 3  | Tacc3   | 360962 | 1,39 | up   |
| 5880777 | 7127390 | 1195054 | transforming, acidic coiled-coil containing protein 3  | Tacc3   | 360962 | 3,11 | up   |
| 6013625 | 7127390 | 1195054 | transforming, acidic coiled-coil containing protein 3  | Tacc3   | 360962 | 1,05 | down |
| 6025528 | 7127390 | 1195053 | transforming, acidic coiled-coil containing protein 3  | Tacc3   | 360962 | 1,26 | down |
| 6118882 | 7127390 | 1195057 | transforming, acidic coiled-coil containing protein 3  | Tacc3   | 360962 | 1,10 | up   |
| 6202649 | 7127390 | 1195050 | transforming, acidic coiled-coil containing protein 3  | Tacc3   | 360962 | 1,35 | up   |
| 6393922 | 7127390 | 1195049 | transforming, acidic coiled-coil containing protein 3  | Tacc3   | 360962 | 1,12 | up   |

|         |         |         |                                                                    |        |        |      |      |
|---------|---------|---------|--------------------------------------------------------------------|--------|--------|------|------|
| 6415892 | 7127390 | 1195047 | transforming, acidic coiled-coil containing protein 3              | Tacc3  | 360962 | 1,18 | down |
| 6442514 | 7127390 | 1195055 | transforming, acidic coiled-coil containing protein 3              | Tacc3  | 360962 | 1,26 | down |
| 6456434 | 7127390 | 1195051 | transforming, acidic coiled-coil containing protein 3              | Tacc3  | 360962 | 1,13 | down |
| 6479181 | 7127390 | 1195045 | transforming, acidic coiled-coil containing protein 3              | Tacc3  | 360962 | 1,23 | up   |
| 6525951 | 7127390 | 1195054 | transforming, acidic coiled-coil containing protein 3              | Tacc3  | 360962 | 1,04 | down |
| 6532316 | 7127390 | 1195056 | transforming, acidic coiled-coil containing protein 3              | Tacc3  | 360962 | 1,01 | up   |
| 6670003 | 7127390 | 1195052 | transforming, acidic coiled-coil containing protein 3              | Tacc3  | 360962 | 1,04 | down |
| 6699235 | 7127390 | 1195054 | transforming, acidic coiled-coil containing protein 3              | Tacc3  | 360962 | 1,41 | down |
| 5674059 | 7087986 | 1098095 | transgelin 3                                                       | Tagln3 | 63837  | 1,03 | down |
| 5819346 | 7087986 | 1098091 | transgelin 3                                                       | Tagln3 | 63837  | 1,02 | down |
| 5822347 | 7087986 | 1098090 | transgelin 3                                                       | Tagln3 | 63837  | 1,86 | up   |
| 6122377 | 7087986 | 1098094 | transgelin 3                                                       | Tagln3 | 63837  | 1,81 | down |
| 6192444 | 7087986 | 1098092 | transgelin 3                                                       | Tagln3 | 63837  | 1,22 | down |
| 6297376 | 7087986 | 1098094 | transgelin 3                                                       | Tagln3 | 63837  | 2,23 | down |
| 6538925 | 7087986 | 1098093 | transgelin 3                                                       | Tagln3 | 63837  | 1,64 | up   |
| 5639792 | 7032444 | 966773  | transient receptor potential cation channel, subfamily M, member 1 | Trpm1  | 361586 | 1,02 | up   |
| 5656550 | 7032444 | 966727  | transient receptor potential cation channel, subfamily M, member 1 | Trpm1  | 361586 | 1,34 | down |
| 5710718 | 7032444 | 966749  | transient receptor potential cation channel, subfamily M, member 1 | Trpm1  | 361586 | 1,03 | down |
| 5725061 | 7032444 | 966765  | transient receptor potential cation channel, subfamily M, member 1 | Trpm1  | 361586 | 1,20 | down |
| 5729263 | 7032444 | 966763  | transient receptor potential cation channel, subfamily M, member 1 | Trpm1  | 361586 | 1,02 | down |
| 5763084 | 7032444 | 966755  | transient receptor potential cation channel, subfamily M, member 1 | Trpm1  | 361586 | 1,01 | up   |
| 5806471 | 7032444 | 966742  | transient receptor potential cation channel, subfamily M, member 1 | Trpm1  | 361586 | 1,80 | down |
| 5836263 | 7032444 | 966759  | transient receptor potential cation channel, subfamily M, member 1 | Trpm1  | 361586 | 1,38 | down |
| 5888834 | 7032444 | 966740  | transient receptor potential cation channel, subfamily M, member 1 | Trpm1  | 361586 | 1,35 | down |
| 5922408 | 7032444 | 966770  | transient receptor potential cation channel, subfamily M, member 1 | Trpm1  | 361586 | 1,24 | down |
| 6085284 | 7032444 | 966771  | transient receptor potential cation channel, subfamily M, member 1 | Trpm1  | 361586 | 1,01 | up   |
| 6098856 | 7032444 | 966753  | transient receptor potential cation channel, subfamily M, member 1 | Trpm1  | 361586 | 1,22 | down |
| 6116996 | 7032444 | 966763  | transient receptor potential cation channel, subfamily M, member 1 | Trpm1  | 361586 | 1,42 | down |
| 6176089 | 7032444 | 966757  | transient receptor potential cation channel, subfamily M, member 1 | Trpm1  | 361586 | 1,14 | up   |
| 6180815 | 7032444 | 966728  | transient receptor potential cation channel, subfamily M, member 1 | Trpm1  | 361586 | 1,32 | down |
| 6313848 | 7032444 | 966762  | transient receptor potential cation channel, subfamily M, member 1 | Trpm1  | 361586 | 1,17 | up   |
| 6319097 | 7032444 | 966758  | transient receptor potential cation channel, subfamily M, member 1 | Trpm1  | 361586 | 1,01 | down |
| 6397174 | 7032444 | 966739  | transient receptor potential cation channel, subfamily M, member 1 | Trpm1  | 361586 | 1,01 | up   |
| 6404472 | 7032444 | 966750  | transient receptor potential cation channel, subfamily M, member 1 | Trpm1  | 361586 | 1,02 | up   |
| 6459449 | 7032444 | 966754  | transient receptor potential cation channel, subfamily M, member 1 | Trpm1  | 361586 | 1,82 | up   |
| 6465470 | 7032444 | 966727  | transient receptor potential cation channel, subfamily M, member 1 | Trpm1  | 361586 | 1,15 | up   |
| 6506465 | 7032444 | 966760  | transient receptor potential cation channel, subfamily M, member 1 | Trpm1  | 361586 | 1,10 | up   |
| 6533782 | 7032444 | 966751  | transient receptor potential cation channel, subfamily M, member 1 | Trpm1  | 361586 | 1,13 | down |
| 6571240 | 7032444 | 966748  | transient receptor potential cation channel, subfamily M, member 1 | Trpm1  | 361586 | 1,31 | down |
| 6600052 | 7032444 | 966758  | transient receptor potential cation channel, subfamily M, member 1 | Trpm1  | 361586 | 1,14 | up   |
| 6670691 | 7032444 | 966769  | transient receptor potential cation channel, subfamily M, member 1 | Trpm1  | 361586 | 1,01 | up   |
| 6677015 | 7032444 | 966745  | transient receptor potential cation channel, subfamily M, member 1 | Trpm1  | 361586 | 1,19 | up   |
| 6681844 | 7032444 | 966747  | transient receptor potential cation channel, subfamily M, member 1 | Trpm1  | 361586 | 1,12 | up   |
| 6734403 | 7032444 | 966744  | transient receptor potential cation channel, subfamily M, member 1 | Trpm1  | 361586 | 1,65 | down |
| 5681561 | 7217594 | 1417013 | transient receptor potential cation channel, subfamily M, member 2 | Trpm2  | 294329 | 1,04 | up   |
| 5687583 | 7217594 | 1417037 | transient receptor potential cation channel, subfamily M, member 2 | Trpm2  | 294329 | 1,13 | up   |
| 5776448 | 7217594 | 1417016 | transient receptor potential cation channel, subfamily M, member 2 | Trpm2  | 294329 | 1,31 | up   |
| 5802246 | 7217594 | 1417015 | transient receptor potential cation channel, subfamily M, member 2 | Trpm2  | 294329 | 1,11 | down |
| 5832945 | 7217594 | 1417018 | transient receptor potential cation channel, subfamily M, member 2 | Trpm2  | 294329 | 1,17 | up   |
| 5872922 | 7217594 | 1417034 | transient receptor potential cation channel, subfamily M, member 2 | Trpm2  | 294329 | 1,03 | down |
| 5882988 | 7217594 | 1417043 | transient receptor potential cation channel, subfamily M, member 2 | Trpm2  | 294329 | 1,37 | up   |
| 5921179 | 7217594 | 1417020 | transient receptor potential cation channel, subfamily M, member 2 | Trpm2  | 294329 | 1,13 | up   |
| 5952423 | 7217594 | 1417035 | transient receptor potential cation channel, subfamily M, member 2 | Trpm2  | 294329 | 1,28 | up   |
| 6006852 | 7217594 | 1417022 | transient receptor potential cation channel, subfamily M, member 2 | Trpm2  | 294329 | 1,03 | up   |
| 6039863 | 7217594 | 1417017 | transient receptor potential cation channel, subfamily M, member 2 | Trpm2  | 294329 | 1,45 | down |
| 6062512 | 7217594 | 1417019 | transient receptor potential cation channel, subfamily M, member 2 | Trpm2  | 294329 | 1,54 | up   |

|         |         |         |                                                                    |       |        |      |      |
|---------|---------|---------|--------------------------------------------------------------------|-------|--------|------|------|
| 6065250 | 7217594 | 1417026 | transient receptor potential cation channel, subfamily M, member 2 | Trpm2 | 294329 | 1,04 | up   |
| 6101313 | 7217594 | 1417028 | transient receptor potential cation channel, subfamily M, member 2 | Trpm2 | 294329 | 1,11 | down |
| 6102884 | 7217594 | 1417041 | transient receptor potential cation channel, subfamily M, member 2 | Trpm2 | 294329 | 1,12 | down |
| 6154811 | 7217594 | 1417023 | transient receptor potential cation channel, subfamily M, member 2 | Trpm2 | 294329 | 1,11 | up   |
| 6163241 | 7217594 | 1417044 | transient receptor potential cation channel, subfamily M, member 2 | Trpm2 | 294329 | 1,14 | down |
| 6172665 | 7217594 | 1417031 | transient receptor potential cation channel, subfamily M, member 2 | Trpm2 | 294329 | 1,34 | up   |
| 6179093 | 7217594 | 1417038 | transient receptor potential cation channel, subfamily M, member 2 | Trpm2 | 294329 | 1,41 | up   |
| 6191146 | 7217594 | 1417042 | transient receptor potential cation channel, subfamily M, member 2 | Trpm2 | 294329 | 1,11 | down |
| 6209128 | 7217594 | 1417027 | transient receptor potential cation channel, subfamily M, member 2 | Trpm2 | 294329 | 1,10 | down |
| 6256079 | 7217594 | 1417040 | transient receptor potential cation channel, subfamily M, member 2 | Trpm2 | 294329 | 1,28 | up   |
| 6287047 | 7217594 | 1417032 | transient receptor potential cation channel, subfamily M, member 2 | Trpm2 | 294329 | 1,04 | up   |
| 6305254 | 7217594 | 1417036 | transient receptor potential cation channel, subfamily M, member 2 | Trpm2 | 294329 | 1,13 | down |
| 6321669 | 7217594 | 1417025 | transient receptor potential cation channel, subfamily M, member 2 | Trpm2 | 294329 | 2,69 | down |
| 6333232 | 7217594 | 1417021 | transient receptor potential cation channel, subfamily M, member 2 | Trpm2 | 294329 | 1,04 | down |
| 6382703 | 7217594 | 1417014 | transient receptor potential cation channel, subfamily M, member 2 | Trpm2 | 294329 | 1,18 | down |
| 6389351 | 7217594 | 1417029 | transient receptor potential cation channel, subfamily M, member 2 | Trpm2 | 294329 | 1,08 | up   |
| 6424785 | 7217594 | 1417039 | transient receptor potential cation channel, subfamily M, member 2 | Trpm2 | 294329 | 1,14 | down |
| 6582129 | 7217594 | 1417030 | transient receptor potential cation channel, subfamily M, member 2 | Trpm2 | 294329 | 1,26 | down |
| 6616507 | 7217594 | 1417033 | transient receptor potential cation channel, subfamily M, member 2 | Trpm2 | 294329 | 1,10 | up   |
| 6622950 | 7217594 | 1417044 | transient receptor potential cation channel, subfamily M, member 2 | Trpm2 | 294329 | 1,38 | down |
| 6671717 | 7217594 | 1417024 | transient receptor potential cation channel, subfamily M, member 2 | Trpm2 | 294329 | 1,16 | down |
| 5740401 | 7050943 | 1011673 | transient receptor potential cation channel, subfamily M, member 4 | Trpm4 | 171143 | 1,18 | down |
| 5746061 | 7050943 | 1011668 | transient receptor potential cation channel, subfamily M, member 4 | Trpm4 | 171143 | 1,02 | down |
| 5797641 | 7050943 | 1011665 | transient receptor potential cation channel, subfamily M, member 4 | Trpm4 | 171143 | 1,08 | down |
| 5804894 | 7050943 | 1011672 | transient receptor potential cation channel, subfamily M, member 4 | Trpm4 | 171143 | 1,33 | up   |
| 6141163 | 7050943 | 1011665 | transient receptor potential cation channel, subfamily M, member 4 | Trpm4 | 171143 | 2,11 | down |
| 6182238 | 7050943 | 1011670 | transient receptor potential cation channel, subfamily M, member 4 | Trpm4 | 171143 | 1,05 | down |
| 6322074 | 7050943 | 1011669 | transient receptor potential cation channel, subfamily M, member 4 | Trpm4 | 171143 | 1,25 | down |
| 6322837 | 7050943 | 1011671 | transient receptor potential cation channel, subfamily M, member 4 | Trpm4 | 171143 | 1,28 | up   |
| 6418442 | 7050943 | 1011666 | transient receptor potential cation channel, subfamily M, member 4 | Trpm4 | 171143 | 1,78 | up   |
| 6516521 | 7050943 | 1011668 | transient receptor potential cation channel, subfamily M, member 4 | Trpm4 | 171143 | 1,29 | up   |
| 6660605 | 7050943 | 1011667 | transient receptor potential cation channel, subfamily M, member 4 | Trpm4 | 171143 | 1,76 | up   |
| 6686433 | 7050943 | 1011664 | transient receptor potential cation channel, subfamily M, member 4 | Trpm4 | 171143 | 1,15 | up   |
| 6309310 | 7040260 | 986100  | transient receptor potential cation channel, subfamily M, member 6 | Trpm6 | 293874 | 1,07 | up   |
| 6441225 | 7040260 | 986086  | transient receptor potential cation channel, subfamily M, member 6 | Trpm6 | 293874 | 1,01 | down |
| 5697798 | 7068475 | 1052087 | transient receptor potential cation channel, subfamily V, member 2 | Trpv2 | 29465  | 1,09 | down |
| 5830248 | 7068475 | 1052084 | transient receptor potential cation channel, subfamily V, member 2 | Trpv2 | 29465  | 1,76 | down |
| 5835620 | 7068475 | 1052089 | transient receptor potential cation channel, subfamily V, member 2 | Trpv2 | 29465  | 1,20 | down |
| 5867420 | 7068475 | 1052088 | transient receptor potential cation channel, subfamily V, member 2 | Trpv2 | 29465  | 1,13 | down |
| 5956886 | 7068475 | 1052083 | transient receptor potential cation channel, subfamily V, member 2 | Trpv2 | 29465  | 2,31 | down |
| 5976374 | 7068475 | 1052085 | transient receptor potential cation channel, subfamily V, member 2 | Trpv2 | 29465  | 1,04 | up   |
| 6007534 | 7068475 | 1052082 | transient receptor potential cation channel, subfamily V, member 2 | Trpv2 | 29465  | 1,22 | up   |
| 6060008 | 7068475 | 1052083 | transient receptor potential cation channel, subfamily V, member 2 | Trpv2 | 29465  | 1,04 | up   |
| 6075194 | 7068475 | 1052096 | transient receptor potential cation channel, subfamily V, member 2 | Trpv2 | 29465  | 1,01 | down |
| 6209116 | 7068475 | 1052092 | transient receptor potential cation channel, subfamily V, member 2 | Trpv2 | 29465  | 1,47 | down |
| 6211031 | 7068475 | 1052081 | transient receptor potential cation channel, subfamily V, member 2 | Trpv2 | 29465  | 1,20 | up   |
| 6227095 | 7068475 | 1052096 | transient receptor potential cation channel, subfamily V, member 2 | Trpv2 | 29465  | 1,04 | up   |
| 6276045 | 7068475 | 1052095 | transient receptor potential cation channel, subfamily V, member 2 | Trpv2 | 29465  | 1,03 | up   |
| 6353148 | 7068475 | 1052081 | transient receptor potential cation channel, subfamily V, member 2 | Trpv2 | 29465  | 1,12 | up   |
| 6378789 | 7068475 | 1052081 | transient receptor potential cation channel, subfamily V, member 2 | Trpv2 | 29465  | 1,09 | up   |
| 6408071 | 7068475 | 1052082 | transient receptor potential cation channel, subfamily V, member 2 | Trpv2 | 29465  | 1,08 | up   |
| 6427360 | 7068475 | 1052094 | transient receptor potential cation channel, subfamily V, member 2 | Trpv2 | 29465  | 1,25 | up   |
| 6521220 | 7068475 | 1052090 | transient receptor potential cation channel, subfamily V, member 2 | Trpv2 | 29465  | 1,08 | down |
| 6522881 | 7068475 | 1052091 | transient receptor potential cation channel, subfamily V, member 2 | Trpv2 | 29465  | 1,22 | up   |
| 6580062 | 7068475 | 1052093 | transient receptor potential cation channel, subfamily V, member 2 | Trpv2 | 29465  | 1,05 | up   |
| 6620409 | 7068475 | 1052086 | transient receptor potential cation channel, subfamily V, member 2 | Trpv2 | 29465  | 1,08 | up   |

|         |         |         |                                                                    |        |        |      |      |
|---------|---------|---------|--------------------------------------------------------------------|--------|--------|------|------|
| 6709239 | 7068475 | 1052096 | transient receptor potential cation channel, subfamily V, member 2 | Trpv2  | 29465  | 1,18 | up   |
| 6722637 | 7068475 | 1052081 | transient receptor potential cation channel, subfamily V, member 2 | Trpv2  | 29465  | 1,26 | up   |
| 5649715 | 7264198 | 1532973 | transient receptor potential cation channel, subfamily V, member 6 | Trpv6  | 114246 | 1,33 | up   |
| 5868468 | 7264198 | 1532968 | transient receptor potential cation channel, subfamily V, member 6 | Trpv6  | 114246 | 1,14 | down |
| 5916565 | 7264198 | 1532969 | transient receptor potential cation channel, subfamily V, member 6 | Trpv6  | 114246 | 2,41 | up   |
| 5964937 | 7264198 | 1532970 | transient receptor potential cation channel, subfamily V, member 6 | Trpv6  | 114246 | 1,09 | up   |
| 5983478 | 7264198 | 1532962 | transient receptor potential cation channel, subfamily V, member 6 | Trpv6  | 114246 | 1,14 | down |
| 6016179 | 7264198 | 1532973 | transient receptor potential cation channel, subfamily V, member 6 | Trpv6  | 114246 | 1,86 | down |
| 6016253 | 7264198 | 1532959 | transient receptor potential cation channel, subfamily V, member 6 | Trpv6  | 114246 | 1,04 | up   |
| 6053215 | 7264198 | 1532960 | transient receptor potential cation channel, subfamily V, member 6 | Trpv6  | 114246 | 1,03 | up   |
| 6125523 | 7264198 | 1532971 | transient receptor potential cation channel, subfamily V, member 6 | Trpv6  | 114246 | 1,39 | up   |
| 6219973 | 7264198 | 1532963 | transient receptor potential cation channel, subfamily V, member 6 | Trpv6  | 114246 | 2,01 | down |
| 6268960 | 7264198 | 1532965 | transient receptor potential cation channel, subfamily V, member 6 | Trpv6  | 114246 | 1,01 | up   |
| 6425556 | 7264198 | 1532966 | transient receptor potential cation channel, subfamily V, member 6 | Trpv6  | 114246 | 1,39 | down |
| 6553162 | 7264198 | 1532961 | transient receptor potential cation channel, subfamily V, member 6 | Trpv6  | 114246 | 1,10 | down |
| 6560037 | 7264198 | 1532967 | transient receptor potential cation channel, subfamily V, member 6 | Trpv6  | 114246 | 1,23 | down |
| 6606582 | 7264198 | 1532972 | transient receptor potential cation channel, subfamily V, member 6 | Trpv6  | 114246 | 1,13 | down |
| 6706693 | 7264198 | 1532958 | transient receptor potential cation channel, subfamily V, member 6 | Trpv6  | 114246 | 1,62 | up   |
| 6729898 | 7264198 | 1532964 | transient receptor potential cation channel, subfamily V, member 6 | Trpv6  | 114246 | 1,63 | up   |
| 5717439 | 7378602 | 1817713 | transketolase-like 1                                               | Tktl1  | 689374 | 1,52 | up   |
| 5773223 | 7378602 | 1817720 | transketolase-like 1                                               | Tktl1  | 689374 | 1,01 | down |
| 5827462 | 7378602 | 1817722 | transketolase-like 1                                               | Tktl1  | 689374 | 1,19 | up   |
| 5830917 | 7378602 | 1817722 | transketolase-like 1                                               | Tktl1  | 689374 | 1,25 | down |
| 5972891 | 7378602 | 1817708 | transketolase-like 1                                               | Tktl1  | 689374 | 1,08 | up   |
| 6006031 | 7378602 | 1817721 | transketolase-like 1                                               | Tktl1  | 689374 | 1,35 | up   |
| 6103320 | 7378602 | 1817709 | transketolase-like 1                                               | Tktl1  | 689374 | 1,06 | up   |
| 6121108 | 7378602 | 1817717 | transketolase-like 1                                               | Tktl1  | 689374 | 1,01 | up   |
| 6123548 | 7378602 | 1817712 | transketolase-like 1                                               | Tktl1  | 689374 | 1,18 | up   |
| 6129939 | 7378602 | 1817711 | transketolase-like 1                                               | Tktl1  | 689374 | 1,03 | up   |
| 6304538 | 7378602 | 1817722 | transketolase-like 1                                               | Tktl1  | 689374 | 1,02 | up   |
| 6346147 | 7378602 | 1817710 | transketolase-like 1                                               | Tktl1  | 689374 | 1,12 | up   |
| 6465192 | 7378602 | 1817715 | transketolase-like 1                                               | Tktl1  | 689374 | 1,60 | up   |
| 6476553 | 7378602 | 1817719 | transketolase-like 1                                               | Tktl1  | 689374 | 1,01 | up   |
| 6596634 | 7378602 | 1817714 | transketolase-like 1                                               | Tktl1  | 689374 | 2,39 | down |
| 6635195 | 7378602 | 1817718 | transketolase-like 1                                               | Tktl1  | 689374 | 1,09 | down |
| 5728771 | 7194285 | 1361467 | transmembrane 4 L six family member 4                              | Tm4sf4 | 116467 | 1,20 | down |
| 5888323 | 7194285 | 1361470 | transmembrane 4 L six family member 4                              | Tm4sf4 | 116467 | 1,03 | up   |
| 6191950 | 7194285 | 1361468 | transmembrane 4 L six family member 4                              | Tm4sf4 | 116467 | 1,18 | up   |
| 6337432 | 7194285 | 1361471 | transmembrane 4 L six family member 4                              | Tm4sf4 | 116467 | 1,14 | down |
| 6674707 | 7194285 | 1361469 | transmembrane 4 L six family member 4                              | Tm4sf4 | 116467 | 1,05 | down |
| 6698420 | 7194285 | 1361471 | transmembrane 4 L six family member 4                              | Tm4sf4 | 116467 | 2,18 | up   |
| 5648409 | 7059908 | 1031314 | transmembrane 7 superfamily member 2                               | Tm7sf2 | 293688 | 1,39 | up   |
| 5805320 | 7059908 | 1031313 | transmembrane 7 superfamily member 2                               | Tm7sf2 | 293688 | 1,50 | up   |
| 5828242 | 7059908 | 1031311 | transmembrane 7 superfamily member 2                               | Tm7sf2 | 293688 | 1,07 | down |
| 6006678 | 7059908 | 1031308 | transmembrane 7 superfamily member 2                               | Tm7sf2 | 293688 | 1,67 | down |
| 6072455 | 7059908 | 1031305 | transmembrane 7 superfamily member 2                               | Tm7sf2 | 293688 | 1,37 | up   |
| 6142251 | 7059908 | 1031307 | transmembrane 7 superfamily member 2                               | Tm7sf2 | 293688 | 1,70 | down |
| 6495653 | 7059908 | 1031306 | transmembrane 7 superfamily member 2                               | Tm7sf2 | 293688 | 1,59 | down |
| 6570067 | 7059908 | 1031304 | transmembrane 7 superfamily member 2                               | Tm7sf2 | 293688 | 2,31 | up   |
| 6622416 | 7059908 | 1031310 | transmembrane 7 superfamily member 2                               | Tm7sf2 | 293688 | 1,06 | down |
| 6664430 | 7059908 | 1031309 | transmembrane 7 superfamily member 2                               | Tm7sf2 | 293688 | 1,42 | down |
| 6675481 | 7059908 | 1031312 | transmembrane 7 superfamily member 2                               | Tm7sf2 | 293688 | 1,26 | up   |
| 5726734 | 7234040 | 1458505 | transmembrane 9 superfamily protein member 4                       | Tm9sf4 | 296279 | 1,12 | down |
| 5783589 | 7234040 | 1458491 | transmembrane 9 superfamily protein member 4                       | Tm9sf4 | 296279 | 1,43 | down |
| 5799415 | 7234040 | 1458496 | transmembrane 9 superfamily protein member 4                       | Tm9sf4 | 296279 | 1,04 | down |
| 5952302 | 7234040 | 1458485 | transmembrane 9 superfamily protein member 4                       | Tm9sf4 | 296279 | 1,08 | down |

|         |         |         |                                               |        |        |      |      |
|---------|---------|---------|-----------------------------------------------|--------|--------|------|------|
| 5991743 | 7234040 | 1458492 | transmembrane 9 superfamily protein member 4  | Tm9sf4 | 296279 | 1,00 | up   |
| 6002380 | 7234040 | 1458489 | transmembrane 9 superfamily protein member 4  | Tm9sf4 | 296279 | 1,04 | up   |
| 6017996 | 7234040 | 1458482 | transmembrane 9 superfamily protein member 4  | Tm9sf4 | 296279 | 1,10 | down |
| 6094262 | 7234040 | 1458488 | transmembrane 9 superfamily protein member 4  | Tm9sf4 | 296279 | 1,04 | up   |
| 6116582 | 7234040 | 1458505 | transmembrane 9 superfamily protein member 4  | Tm9sf4 | 296279 | 1,29 | down |
| 6143653 | 7234040 | 1458497 | transmembrane 9 superfamily protein member 4  | Tm9sf4 | 296279 | 1,01 | down |
| 6170597 | 7234040 | 1458494 | transmembrane 9 superfamily protein member 4  | Tm9sf4 | 296279 | 1,06 | up   |
| 6191963 | 7234040 | 1458495 | transmembrane 9 superfamily protein member 4  | Tm9sf4 | 296279 | 1,09 | down |
| 6230682 | 7234040 | 1458485 | transmembrane 9 superfamily protein member 4  | Tm9sf4 | 296279 | 1,39 | up   |
| 6450833 | 7234040 | 1458493 | transmembrane 9 superfamily protein member 4  | Tm9sf4 | 296279 | 1,12 | up   |
| 6471703 | 7234040 | 1458487 | transmembrane 9 superfamily protein member 4  | Tm9sf4 | 296279 | 1,02 | up   |
| 6505971 | 7234040 | 1458502 | transmembrane 9 superfamily protein member 4  | Tm9sf4 | 296279 | 1,06 | down |
| 6524370 | 7234040 | 1458482 | transmembrane 9 superfamily protein member 4  | Tm9sf4 | 296279 | 1,36 | up   |
| 6528496 | 7234040 | 1458500 | transmembrane 9 superfamily protein member 4  | Tm9sf4 | 296279 | 1,07 | down |
| 6543748 | 7234040 | 1458503 | transmembrane 9 superfamily protein member 4  | Tm9sf4 | 296279 | 1,02 | up   |
| 6609863 | 7234040 | 1458486 | transmembrane 9 superfamily protein member 4  | Tm9sf4 | 296279 | 1,03 | down |
| 6663249 | 7234040 | 1458500 | transmembrane 9 superfamily protein member 4  | Tm9sf4 | 296279 | 1,07 | down |
| 6730344 | 7234040 | 1458504 | transmembrane 9 superfamily protein member 4  | Tm9sf4 | 296279 | 1,24 | down |
| 6564322 | 7111066 | 1154950 | transmembrane and coiled-coil domain family 2 | Tmcc2  | 305095 | 1,37 | up   |
| 6665598 | 7111066 | 1154968 | transmembrane and coiled-coil domain family 2 | Tmcc2  | 305095 | 2,01 | up   |
| 5787350 | 7313905 | 1656856 | transmembrane and coiled-coil domain family 3 | Tmcc3  | 314751 | 1,28 | up   |
| 5808546 | 7313905 | 1656861 | transmembrane and coiled-coil domain family 3 | Tmcc3  | 314751 | 1,23 | up   |
| 5940057 | 7313905 | 1656861 | transmembrane and coiled-coil domain family 3 | Tmcc3  | 314751 | 1,13 | down |
| 5947085 | 7313905 | 1656861 | transmembrane and coiled-coil domain family 3 | Tmcc3  | 314751 | 1,01 | up   |
| 5992204 | 7313905 | 1656861 | transmembrane and coiled-coil domain family 3 | Tmcc3  | 314751 | 1,20 | up   |
| 6049931 | 7313905 | 1656858 | transmembrane and coiled-coil domain family 3 | Tmcc3  | 314751 | 1,07 | up   |
| 6168795 | 7313905 | 1656858 | transmembrane and coiled-coil domain family 3 | Tmcc3  | 314751 | 2,12 | down |
| 6194461 | 7313905 | 1656861 | transmembrane and coiled-coil domain family 3 | Tmcc3  | 314751 | 1,05 | up   |
| 6326752 | 7313905 | 1656861 | transmembrane and coiled-coil domain family 3 | Tmcc3  | 314751 | 1,12 | up   |
| 6368808 | 7313905 | 1656861 | transmembrane and coiled-coil domain family 3 | Tmcc3  | 314751 | 1,00 | down |
| 6505845 | 7313905 | 1656838 | transmembrane and coiled-coil domain family 3 | Tmcc3  | 314751 | 1,48 | down |
| 6545476 | 7313905 | 1656861 | transmembrane and coiled-coil domain family 3 | Tmcc3  | 314751 | 1,31 | up   |
| 5666598 | 7153571 | 1259019 | transmembrane and coiled-coil domains 3       | Tmco3  | 306607 | 1,14 | up   |
| 5683337 | 7153571 | 1259037 | transmembrane and coiled-coil domains 3       | Tmco3  | 306607 | 1,37 | down |
| 5763550 | 7153571 | 1259037 | transmembrane and coiled-coil domains 3       | Tmco3  | 306607 | 1,22 | up   |
| 5801022 | 7153571 | 1259034 | transmembrane and coiled-coil domains 3       | Tmco3  | 306607 | 1,28 | down |
| 5823327 | 7153571 | 1259028 | transmembrane and coiled-coil domains 3       | Tmco3  | 306607 | 1,59 | down |
| 5883350 | 7153571 | 1259019 | transmembrane and coiled-coil domains 3       | Tmco3  | 306607 | 2,61 | up   |
| 5932562 | 7153571 | 1259031 | transmembrane and coiled-coil domains 3       | Tmco3  | 306607 | 1,23 | down |
| 5999265 | 7153571 | 1259019 | transmembrane and coiled-coil domains 3       | Tmco3  | 306607 | 1,10 | up   |
| 6143549 | 7153571 | 1259021 | transmembrane and coiled-coil domains 3       | Tmco3  | 306607 | 1,06 | up   |
| 6196177 | 7153571 | 1259023 | transmembrane and coiled-coil domains 3       | Tmco3  | 306607 | 1,15 | down |
| 6216350 | 7153571 | 1259029 | transmembrane and coiled-coil domains 3       | Tmco3  | 306607 | 1,11 | up   |
| 6257704 | 7153571 | 1259037 | transmembrane and coiled-coil domains 3       | Tmco3  | 306607 | 1,23 | up   |
| 6278880 | 7153571 | 1259021 | transmembrane and coiled-coil domains 3       | Tmco3  | 306607 | 1,07 | up   |
| 6287672 | 7153571 | 1259019 | transmembrane and coiled-coil domains 3       | Tmco3  | 306607 | 1,94 | up   |
| 6365707 | 7153571 | 1259035 | transmembrane and coiled-coil domains 3       | Tmco3  | 306607 | 1,06 | down |
| 6395858 | 7153571 | 1259036 | transmembrane and coiled-coil domains 3       | Tmco3  | 306607 | 1,00 | down |
| 6433534 | 7153571 | 1259034 | transmembrane and coiled-coil domains 3       | Tmco3  | 306607 | 1,02 | up   |
| 6559768 | 7153571 | 1259027 | transmembrane and coiled-coil domains 3       | Tmco3  | 306607 | 1,11 | down |
| 6673540 | 7153571 | 1259030 | transmembrane and coiled-coil domains 3       | Tmco3  | 306607 | 1,14 | down |
| 5620667 | 7280959 | 1575049 | transmembrane and coiled-coil domains 4       | Tmco4  | 500573 | 1,15 | up   |
| 5628908 | 7280959 | 1575044 | transmembrane and coiled-coil domains 4       | Tmco4  | 500573 | 2,32 | up   |
| 5795031 | 7280959 | 1575048 | transmembrane and coiled-coil domains 4       | Tmco4  | 500573 | 1,37 | down |
| 5820917 | 7280959 | 1575053 | transmembrane and coiled-coil domains 4       | Tmco4  | 500573 | 1,11 | up   |
| 5951754 | 7280959 | 1575051 | transmembrane and coiled-coil domains 4       | Tmco4  | 500573 | 1,03 | up   |

|         |         |         |                                                           |        |        |      |      |
|---------|---------|---------|-----------------------------------------------------------|--------|--------|------|------|
| 5979771 | 7280959 | 1575045 | transmembrane and coiled-coil domains 4                   | Tmco4  | 500573 | 1,17 | up   |
| 6034469 | 7280959 | 1575050 | transmembrane and coiled-coil domains 4                   | Tmco4  | 500573 | 1,07 | down |
| 6114856 | 7280959 | 1575042 | transmembrane and coiled-coil domains 4                   | Tmco4  | 500573 | 1,27 | up   |
| 6153262 | 7280959 | 1575040 | transmembrane and coiled-coil domains 4                   | Tmco4  | 500573 | 1,04 | up   |
| 6341887 | 7280959 | 1575043 | transmembrane and coiled-coil domains 4                   | Tmco4  | 500573 | 1,23 | up   |
| 6371474 | 7280959 | 1575052 | transmembrane and coiled-coil domains 4                   | Tmco4  | 500573 | 2,56 | up   |
| 6433548 | 7280959 | 1575047 | transmembrane and coiled-coil domains 4                   | Tmco4  | 500573 | 1,05 | up   |
| 6636900 | 7280959 | 1575052 | transmembrane and coiled-coil domains 4                   | Tmco4  | 500573 | 1,17 | down |
| 5626832 | 7142416 | 1231810 | transmembrane and tetratricopeptide repeat containing 4   | Tmtc4  | 290501 | 1,15 | down |
| 5652886 | 7142416 | 1231786 | transmembrane and tetratricopeptide repeat containing 4   | Tmtc4  | 290501 | 1,08 | up   |
| 5883320 | 7142416 | 1231802 | transmembrane and tetratricopeptide repeat containing 4   | Tmtc4  | 290501 | 1,37 | down |
| 5905198 | 7142416 | 1231800 | transmembrane and tetratricopeptide repeat containing 4   | Tmtc4  | 290501 | 1,05 | down |
| 5925113 | 7142416 | 1231792 | transmembrane and tetratricopeptide repeat containing 4   | Tmtc4  | 290501 | 1,94 | up   |
| 5928275 | 7142416 | 1231811 | transmembrane and tetratricopeptide repeat containing 4   | Tmtc4  | 290501 | 1,13 | down |
| 5983145 | 7142416 | 1231809 | transmembrane and tetratricopeptide repeat containing 4   | Tmtc4  | 290501 | 1,31 | down |
| 6041586 | 7142416 | 1231813 | transmembrane and tetratricopeptide repeat containing 4   | Tmtc4  | 290501 | 1,23 | down |
| 6045861 | 7142416 | 1231793 | transmembrane and tetratricopeptide repeat containing 4   | Tmtc4  | 290501 | 1,07 | down |
| 6052180 | 7142416 | 1231786 | transmembrane and tetratricopeptide repeat containing 4   | Tmtc4  | 290501 | 1,09 | down |
| 6062459 | 7142416 | 1231795 | transmembrane and tetratricopeptide repeat containing 4   | Tmtc4  | 290501 | 1,25 | down |
| 6102273 | 7142416 | 1231792 | transmembrane and tetratricopeptide repeat containing 4   | Tmtc4  | 290501 | 1,51 | down |
| 6122791 | 7142416 | 1231797 | transmembrane and tetratricopeptide repeat containing 4   | Tmtc4  | 290501 | 1,21 | down |
| 6175573 | 7142416 | 1231794 | transmembrane and tetratricopeptide repeat containing 4   | Tmtc4  | 290501 | 1,04 | up   |
| 6199014 | 7142416 | 1231813 | transmembrane and tetratricopeptide repeat containing 4   | Tmtc4  | 290501 | 1,21 | up   |
| 6287648 | 7142416 | 1231786 | transmembrane and tetratricopeptide repeat containing 4   | Tmtc4  | 290501 | 1,86 | down |
| 6331004 | 7142416 | 1231787 | transmembrane and tetratricopeptide repeat containing 4   | Tmtc4  | 290501 | 1,17 | down |
| 6478393 | 7142416 | 1231791 | transmembrane and tetratricopeptide repeat containing 4   | Tmtc4  | 290501 | 1,21 | down |
| 6546798 | 7142416 | 1231819 | transmembrane and tetratricopeptide repeat containing 4   | Tmtc4  | 290501 | 1,85 | up   |
| 6555028 | 7142416 | 1231790 | transmembrane and tetratricopeptide repeat containing 4   | Tmtc4  | 290501 | 1,31 | down |
| 6561099 | 7142416 | 1231796 | transmembrane and tetratricopeptide repeat containing 4   | Tmtc4  | 290501 | 1,21 | down |
| 6563175 | 7142416 | 1231798 | transmembrane and tetratricopeptide repeat containing 4   | Tmtc4  | 290501 | 1,16 | down |
| 5639650 | 7363718 | 1778525 | transmembrane BAX inhibitor motif containing 1            | Tmbim1 | 316516 | 1,01 | down |
| 5811030 | 7363718 | 1778519 | transmembrane BAX inhibitor motif containing 1            | Tmbim1 | 316516 | 2,03 | down |
| 5825247 | 7363718 | 1778527 | transmembrane BAX inhibitor motif containing 1            | Tmbim1 | 316516 | 1,09 | up   |
| 5852888 | 7363718 | 1778528 | transmembrane BAX inhibitor motif containing 1            | Tmbim1 | 316516 | 1,37 | down |
| 5986376 | 7363718 | 1778520 | transmembrane BAX inhibitor motif containing 1            | Tmbim1 | 316516 | 1,88 | down |
| 6028721 | 7363718 | 1778522 | transmembrane BAX inhibitor motif containing 1            | Tmbim1 | 316516 | 1,03 | down |
| 6057698 | 7363718 | 1778529 | transmembrane BAX inhibitor motif containing 1            | Tmbim1 | 316516 | 2,17 | down |
| 6214631 | 7363718 | 1778524 | transmembrane BAX inhibitor motif containing 1            | Tmbim1 | 316516 | 1,11 | up   |
| 6405140 | 7363718 | 1778526 | transmembrane BAX inhibitor motif containing 1            | Tmbim1 | 316516 | 1,03 | down |
| 6408046 | 7363718 | 1778530 | transmembrane BAX inhibitor motif containing 1            | Tmbim1 | 316516 | 2,24 | down |
| 6559553 | 7363718 | 1778523 | transmembrane BAX inhibitor motif containing 1            | Tmbim1 | 316516 | 1,31 | up   |
| 6589439 | 7363718 | 1778530 | transmembrane BAX inhibitor motif containing 1            | Tmbim1 | 316516 | 2,14 | down |
| 6672638 | 7363718 | 1778521 | transmembrane BAX inhibitor motif containing 1            | Tmbim1 | 316516 | 1,09 | up   |
| 5748621 | 7315441 | 1660631 | transmembrane BAX inhibitor motif containing 4            | Tmbim4 | 362884 | 1,10 | up   |
| 5854595 | 7315441 | 1660632 | transmembrane BAX inhibitor motif containing 4            | Tmbim4 | 362884 | 1,45 | up   |
| 5855357 | 7315441 | 1660633 | transmembrane BAX inhibitor motif containing 4            | Tmbim4 | 362884 | 1,59 | down |
| 5895043 | 7315441 | 1660626 | transmembrane BAX inhibitor motif containing 4            | Tmbim4 | 362884 | 2,67 | down |
| 6134528 | 7315441 | 1660626 | transmembrane BAX inhibitor motif containing 4            | Tmbim4 | 362884 | 1,06 | down |
| 6209102 | 7315441 | 1660629 | transmembrane BAX inhibitor motif containing 4            | Tmbim4 | 362884 | 1,04 | down |
| 6419524 | 7315441 | 1660627 | transmembrane BAX inhibitor motif containing 4            | Tmbim4 | 362884 | 1,01 | up   |
| 6570420 | 7315441 | 1660628 | transmembrane BAX inhibitor motif containing 4            | Tmbim4 | 362884 | 1,03 | up   |
| 6577900 | 7315441 | 1660630 | transmembrane BAX inhibitor motif containing 4            | Tmbim4 | 362884 | 1,22 | up   |
| 5622465 | 7175355 | 1313243 | transmembrane emp24 protein transport domain containing 7 | Tmed7  | 252889 | 1,04 | down |
| 5960996 | 7175355 | 1313243 | transmembrane emp24 protein transport domain containing 7 | Tmed7  | 252889 | 1,10 | up   |
| 5991993 | 7175355 | 1313240 | transmembrane emp24 protein transport domain containing 7 | Tmed7  | 252889 | 1,81 | down |
| 6262150 | 7175355 | 1313241 | transmembrane emp24 protein transport domain containing 7 | Tmed7  | 252889 | 1,60 | down |

|         |         |         |                                                           |          |        |      |      |
|---------|---------|---------|-----------------------------------------------------------|----------|--------|------|------|
| 6377215 | 7175355 | 1313244 | transmembrane emp24 protein transport domain containing 7 | Tmed7    | 252889 | 1,03 | up   |
| 6390336 | 7175355 | 1313244 | transmembrane emp24 protein transport domain containing 7 | Tmed7    | 252889 | 1,18 | down |
| 6522373 | 7175355 | 1313244 | transmembrane emp24 protein transport domain containing 7 | Tmed7    | 252889 | 1,35 | down |
| 6557265 | 7175355 | 1313239 | transmembrane emp24 protein transport domain containing 7 | Tmed7    | 252889 | 1,39 | down |
| 6614908 | 7175355 | 1313240 | transmembrane emp24 protein transport domain containing 7 | Tmed7    | 252889 | 1,32 | down |
| 6722274 | 7175355 | 1313244 | transmembrane emp24 protein transport domain containing 7 | Tmed7    | 252889 | 1,98 | down |
| 5767198 | 7221420 | 1426254 | transmembrane protease, serine 3                          | Tmprss3  | 309665 | 1,34 | down |
| 5799582 | 7221420 | 1426252 | transmembrane protease, serine 3                          | Tmprss3  | 309665 | 1,32 | down |
| 5812230 | 7221420 | 1426259 | transmembrane protease, serine 3                          | Tmprss3  | 309665 | 1,00 | down |
| 5879590 | 7221420 | 1426245 | transmembrane protease, serine 3                          | Tmprss3  | 309665 | 1,00 | down |
| 5978820 | 7221420 | 1426250 | transmembrane protease, serine 3                          | Tmprss3  | 309665 | 1,31 | up   |
| 6038279 | 7221420 | 1426245 | transmembrane protease, serine 3                          | Tmprss3  | 309665 | 1,45 | up   |
| 6112991 | 7221420 | 1426243 | transmembrane protease, serine 3                          | Tmprss3  | 309665 | 1,45 | down |
| 6128890 | 7221420 | 1426258 | transmembrane protease, serine 3                          | Tmprss3  | 309665 | 1,19 | down |
| 6242902 | 7221420 | 1426253 | transmembrane protease, serine 3                          | Tmprss3  | 309665 | 1,28 | down |
| 6277946 | 7221420 | 1426244 | transmembrane protease, serine 3                          | Tmprss3  | 309665 | 1,22 | up   |
| 6287384 | 7221420 | 1426256 | transmembrane protease, serine 3                          | Tmprss3  | 309665 | 1,05 | up   |
| 6288494 | 7221420 | 1426255 | transmembrane protease, serine 3                          | Tmprss3  | 309665 | 1,04 | up   |
| 6322683 | 7221420 | 1426260 | transmembrane protease, serine 3                          | Tmprss3  | 309665 | 2,10 | up   |
| 6382187 | 7221420 | 1426261 | transmembrane protease, serine 3                          | Tmprss3  | 309665 | 1,21 | up   |
| 6541661 | 7221420 | 1426246 | transmembrane protease, serine 3                          | Tmprss3  | 309665 | 1,14 | up   |
| 6670543 | 7221420 | 1426248 | transmembrane protease, serine 3                          | Tmprss3  | 309665 | 1,02 | down |
| 5627755 | 7102369 | 1133416 | transmembrane protein 116                                 | Tmem116  | 690442 | 1,11 | up   |
| 5717855 | 7102369 | 1133429 | transmembrane protein 116                                 | Tmem116  | 690442 | 1,53 | down |
| 6162977 | 7102369 | 1133430 | transmembrane protein 116                                 | Tmem116  | 690442 | 1,26 | up   |
| 6220305 | 7102369 | 1133418 | transmembrane protein 116                                 | Tmem116  | 690442 | 1,15 | down |
| 6363197 | 7102369 | 1133416 | transmembrane protein 116                                 | Tmem116  | 690442 | 1,40 | up   |
| 6418283 | 7102369 | 1133421 | transmembrane protein 116                                 | Tmem116  | 690442 | 1,25 | down |
| 6460621 | 7102369 | 1133423 | transmembrane protein 116                                 | Tmem116  | 690442 | 1,14 | down |
| 6489539 | 7102369 | 1133417 | transmembrane protein 116                                 | Tmem116  | 690442 | 1,18 | down |
| 6559258 | 7102369 | 1133432 | transmembrane protein 116                                 | Tmem116  | 690442 | 1,06 | up   |
| 6600870 | 7102369 | 1133420 | transmembrane protein 116                                 | Tmem116  | 690442 | 2,09 | down |
| 6643809 | 7102369 | 1133425 | transmembrane protein 116                                 | Tmem116  | 690442 | 1,06 | down |
| 5793794 | 7059702 | 1030772 | transmembrane protein 151A                                | Tmem151a | 309158 | 1,05 | up   |
| 5912969 | 7059702 | 1030773 | transmembrane protein 151A                                | Tmem151a | 309158 | 2,26 | up   |
| 5918428 | 7059702 | 1030772 | transmembrane protein 151A                                | Tmem151a | 309158 | 4,39 | up   |
| 5870128 | 7380452 | 1821679 | transmembrane protein 164                                 | Tmem164  | 367763 | 1,06 | up   |
| 5885811 | 7380452 | 1821692 | transmembrane protein 164                                 | Tmem164  | 367763 | 1,01 | down |
| 6093655 | 7380452 | 1821679 | transmembrane protein 164                                 | Tmem164  | 367763 | 1,19 | up   |
| 6170173 | 7380452 | 1821680 | transmembrane protein 164                                 | Tmem164  | 367763 | 1,26 | up   |
| 6450885 | 7380452 | 1821679 | transmembrane protein 164                                 | Tmem164  | 367763 | 1,01 | down |
| 6470055 | 7380452 | 1821685 | transmembrane protein 164                                 | Tmem164  | 367763 | 1,08 | up   |
| 6473244 | 7380452 | 1821679 | transmembrane protein 164                                 | Tmem164  | 367763 | 1,03 | down |
| 6528362 | 7380452 | 1821702 | transmembrane protein 164                                 | Tmem164  | 367763 | 1,02 | up   |
| 6595498 | 7380452 | 1821688 | transmembrane protein 164                                 | Tmem164  | 367763 | 1,12 | up   |
| 5668065 | 7264577 | 1533800 | transmembrane protein 176B                                | Tmem176b | 171411 | 1,04 | down |
| 6094573 | 7264577 | 1533801 | transmembrane protein 176B                                | Tmem176b | 171411 | 2,21 | up   |
| 6145964 | 7264577 | 1533803 | transmembrane protein 176B                                | Tmem176b | 171411 | 1,05 | down |
| 6314061 | 7264577 | 1533800 | transmembrane protein 176B                                | Tmem176b | 171411 | 1,32 | down |
| 6323690 | 7264577 | 1533804 | transmembrane protein 176B                                | Tmem176b | 171411 | 1,02 | down |
| 6379743 | 7264577 | 1533805 | transmembrane protein 176B                                | Tmem176b | 171411 | 1,45 | down |
| 6462272 | 7264577 | 1533802 | transmembrane protein 176B                                | Tmem176b | 171411 | 1,15 | up   |
| 5672288 | 7060195 | 1031959 | transmembrane protein 179B                                | Tmem179b | 690263 | 1,24 | down |
| 5978889 | 7060195 | 1031960 | transmembrane protein 179B                                | Tmem179b | 690263 | 1,12 | up   |
| 6381449 | 7060195 | 1031961 | transmembrane protein 179B                                | Tmem179b | 690263 | 1,40 | up   |
| 6601327 | 7060195 | 1031959 | transmembrane protein 179B                                | Tmem179b | 690263 | 1,09 | down |



|         |         |         |                            |          |        |      |      |
|---------|---------|---------|----------------------------|----------|--------|------|------|
| 5663839 | 7064905 | 1043438 | transmembrane protein 186  | Tmem186  | 497863 | 1,18 | down |
| 5790968 | 7064905 | 1043436 | transmembrane protein 186  | Tmem186  | 497863 | 1,00 | down |
| 6273094 | 7064905 | 1043438 | transmembrane protein 186  | Tmem186  | 497863 | 2,42 | up   |
| 6367493 | 7064905 | 1043436 | transmembrane protein 186  | Tmem186  | 497863 | 2,21 | down |
| 6538279 | 7064905 | 1043438 | transmembrane protein 186  | Tmem186  | 497863 | 1,31 | down |
| 6543552 | 7064905 | 1043438 | transmembrane protein 186  | Tmem186  | 497863 | 1,30 | up   |
| 6552293 | 7064905 | 1043438 | transmembrane protein 186  | Tmem186  | 497863 | 1,09 | up   |
| 5655913 | 7297483 | 1615247 | transmembrane protein 195  | Tmem195  | 362732 | 1,61 | up   |
| 5805823 | 7297483 | 1615251 | transmembrane protein 195  | Tmem195  | 362732 | 1,01 | up   |
| 5844208 | 7297483 | 1615247 | transmembrane protein 195  | Tmem195  | 362732 | 1,20 | down |
| 5976875 | 7297483 | 1615270 | transmembrane protein 195  | Tmem195  | 362732 | 1,20 | up   |
| 6031139 | 7297483 | 1615270 | transmembrane protein 195  | Tmem195  | 362732 | 1,05 | up   |
| 6219943 | 7297483 | 1615248 | transmembrane protein 195  | Tmem195  | 362732 | 1,61 | up   |
| 6221477 | 7297483 | 1615282 | transmembrane protein 195  | Tmem195  | 362732 | 1,69 | down |
| 6348198 | 7297483 | 1615277 | transmembrane protein 195  | Tmem195  | 362732 | 1,36 | down |
| 6378387 | 7297483 | 1615296 | transmembrane protein 195  | Tmem195  | 362732 | 1,09 | up   |
| 6390210 | 7297483 | 1615284 | transmembrane protein 195  | Tmem195  | 362732 | 1,17 | down |
| 6391682 | 7297483 | 1615278 | transmembrane protein 195  | Tmem195  | 362732 | 1,02 | down |
| 6473025 | 7297483 | 1615279 | transmembrane protein 195  | Tmem195  | 362732 | 1,10 | down |
| 6510604 | 7297483 | 1615289 | transmembrane protein 195  | Tmem195  | 362732 | 1,01 | up   |
| 6643150 | 7297483 | 1615288 | transmembrane protein 195  | Tmem195  | 362732 | 1,16 | up   |
| 6673731 | 7297483 | 1615283 | transmembrane protein 195  | Tmem195  | 362732 | 2,16 | up   |
| 6678474 | 7297483 | 1615247 | transmembrane protein 195  | Tmem195  | 362732 | 1,00 | up   |
| 6690277 | 7297483 | 1615266 | transmembrane protein 195  | Tmem195  | 362732 | 1,08 | up   |
| 5959270 | 7025681 | 950460  | transmembrane protein 200A | Tmem200a | 498987 | 1,17 | down |
| 6016441 | 7025681 | 950461  | transmembrane protein 200A | Tmem200a | 498987 | 1,11 | up   |
| 6289426 | 7025681 | 950461  | transmembrane protein 200A | Tmem200a | 498987 | 1,18 | down |
| 6446642 | 7025681 | 950460  | transmembrane protein 200A | Tmem200a | 498987 | 2,44 | down |
| 6588356 | 7025681 | 950474  | transmembrane protein 200A | Tmem200a | 498987 | 1,05 | down |
| 6641683 | 7025681 | 950473  | transmembrane protein 200A | Tmem200a | 498987 | 1,46 | up   |
| 5641248 | 7344836 | 1732411 | transmembrane protein 25   | Tmem25   | 689172 | 1,51 | down |
| 5753917 | 7344836 | 1732409 | transmembrane protein 25   | Tmem25   | 689172 | 1,32 | up   |
| 5800685 | 7344836 | 1732409 | transmembrane protein 25   | Tmem25   | 689172 | 1,12 | down |
| 5974178 | 7344836 | 1732409 | transmembrane protein 25   | Tmem25   | 689172 | 1,79 | down |
| 6026321 | 7344836 | 1732407 | transmembrane protein 25   | Tmem25   | 689172 | 1,59 | down |
| 6194705 | 7344836 | 1732409 | transmembrane protein 25   | Tmem25   | 689172 | 1,45 | up   |
| 6220459 | 7344836 | 1732408 | transmembrane protein 25   | Tmem25   | 689172 | 1,36 | down |
| 6261432 | 7344836 | 1732411 | transmembrane protein 25   | Tmem25   | 689172 | 1,26 | down |
| 6262456 | 7344836 | 1732411 | transmembrane protein 25   | Tmem25   | 689172 | 1,08 | up   |
| 6303689 | 7344836 | 1732408 | transmembrane protein 25   | Tmem25   | 689172 | 1,64 | down |
| 6327437 | 7344836 | 1732411 | transmembrane protein 25   | Tmem25   | 689172 | 1,38 | up   |
| 6402086 | 7344836 | 1732409 | transmembrane protein 25   | Tmem25   | 689172 | 2,04 | down |
| 5949936 | 7231775 | 1452121 | transmembrane protein 62   | Tmem62   | 311350 | 1,67 | down |
| 5703139 | 7352100 | 1750206 | transmembrane protein 63b  | Tmem63b  | 363197 | 1,00 | down |
| 5926281 | 7352100 | 1750199 | transmembrane protein 63b  | Tmem63b  | 363197 | 1,11 | up   |
| 5990979 | 7352100 | 1750197 | transmembrane protein 63b  | Tmem63b  | 363197 | 1,28 | up   |
| 6061079 | 7352100 | 1750195 | transmembrane protein 63b  | Tmem63b  | 363197 | 1,03 | down |
| 6073397 | 7352100 | 1750213 | transmembrane protein 63b  | Tmem63b  | 363197 | 1,06 | down |
| 6099869 | 7352100 | 1750211 | transmembrane protein 63b  | Tmem63b  | 363197 | 1,18 | up   |
| 6127933 | 7352100 | 1750208 | transmembrane protein 63b  | Tmem63b  | 363197 | 1,05 | up   |
| 6156365 | 7352100 | 1750202 | transmembrane protein 63b  | Tmem63b  | 363197 | 1,07 | down |
| 6166497 | 7352100 | 1750190 | transmembrane protein 63b  | Tmem63b  | 363197 | 1,35 | up   |
| 6169310 | 7352100 | 1750214 | transmembrane protein 63b  | Tmem63b  | 363197 | 1,03 | down |
| 6230294 | 7352100 | 1750192 | transmembrane protein 63b  | Tmem63b  | 363197 | 1,39 | up   |
| 6279873 | 7352100 | 1750196 | transmembrane protein 63b  | Tmem63b  | 363197 | 1,26 | up   |
| 6284515 | 7352100 | 1750194 | transmembrane protein 63b  | Tmem63b  | 363197 | 1,17 | down |

|         |         |         |                                                             |         |        |      |      |
|---------|---------|---------|-------------------------------------------------------------|---------|--------|------|------|
| 6432190 | 7352100 | 1750207 | transmembrane protein 63b                                   | Tmem63b | 363197 | 1,24 | down |
| 6444025 | 7352100 | 1750205 | transmembrane protein 63b                                   | Tmem63b | 363197 | 1,03 | down |
| 6510340 | 7352100 | 1750212 | transmembrane protein 63b                                   | Tmem63b | 363197 | 1,11 | down |
| 6528386 | 7352100 | 1750200 | transmembrane protein 63b                                   | Tmem63b | 363197 | 1,07 | down |
| 6532983 | 7352100 | 1750209 | transmembrane protein 63b                                   | Tmem63b | 363197 | 1,19 | down |
| 6609280 | 7352100 | 1750204 | transmembrane protein 63b                                   | Tmem63b | 363197 | 1,07 | up   |
| 6632989 | 7352100 | 1750198 | transmembrane protein 63b                                   | Tmem63b | 363197 | 1,12 | up   |
| 6721516 | 7352100 | 1750201 | transmembrane protein 63b                                   | Tmem63b | 363197 | 1,29 | down |
| 6736778 | 7352100 | 1750210 | transmembrane protein 63b                                   | Tmem63b | 363197 | 1,31 | down |
| 5625647 | 7300446 | 1622878 | transmembrane protein 63c                                   | Tmem63c | 314332 | 1,51 | up   |
| 5699540 | 7300446 | 1622851 | transmembrane protein 63c                                   | Tmem63c | 314332 | 1,34 | down |
| 5829315 | 7300446 | 1622865 | transmembrane protein 63c                                   | Tmem63c | 314332 | 1,02 | up   |
| 5904458 | 7300446 | 1622846 | transmembrane protein 63c                                   | Tmem63c | 314332 | 1,33 | up   |
| 5910910 | 7300446 | 1622860 | transmembrane protein 63c                                   | Tmem63c | 314332 | 1,13 | down |
| 5946917 | 7300446 | 1622871 | transmembrane protein 63c                                   | Tmem63c | 314332 | 1,13 | down |
| 5996964 | 7300446 | 1622857 | transmembrane protein 63c                                   | Tmem63c | 314332 | 1,42 | down |
| 6000719 | 7300446 | 1622867 | transmembrane protein 63c                                   | Tmem63c | 314332 | 1,08 | down |
| 6048745 | 7300446 | 1622868 | transmembrane protein 63c                                   | Tmem63c | 314332 | 1,08 | up   |
| 6129498 | 7300446 | 1622848 | transmembrane protein 63c                                   | Tmem63c | 314332 | 1,00 | up   |
| 6138714 | 7300446 | 1622874 | transmembrane protein 63c                                   | Tmem63c | 314332 | 1,38 | down |
| 6141756 | 7300446 | 1622855 | transmembrane protein 63c                                   | Tmem63c | 314332 | 1,51 | down |
| 6171685 | 7300446 | 1622843 | transmembrane protein 63c                                   | Tmem63c | 314332 | 1,93 | up   |
| 6205366 | 7300446 | 1622877 | transmembrane protein 63c                                   | Tmem63c | 314332 | 1,09 | down |
| 6211279 | 7300446 | 1622846 | transmembrane protein 63c                                   | Tmem63c | 314332 | 1,28 | up   |
| 6254942 | 7300446 | 1622850 | transmembrane protein 63c                                   | Tmem63c | 314332 | 1,09 | down |
| 6336796 | 7300446 | 1622873 | transmembrane protein 63c                                   | Tmem63c | 314332 | 1,24 | up   |
| 6373663 | 7300446 | 1622869 | transmembrane protein 63c                                   | Tmem63c | 314332 | 1,22 | down |
| 6394822 | 7300446 | 1622875 | transmembrane protein 63c                                   | Tmem63c | 314332 | 1,07 | up   |
| 6510579 | 7300446 | 1622852 | transmembrane protein 63c                                   | Tmem63c | 314332 | 1,31 | up   |
| 6517698 | 7300446 | 1622856 | transmembrane protein 63c                                   | Tmem63c | 314332 | 1,28 | down |
| 6523082 | 7300446 | 1622870 | transmembrane protein 63c                                   | Tmem63c | 314332 | 1,28 | down |
| 6526640 | 7300446 | 1622864 | transmembrane protein 63c                                   | Tmem63c | 314332 | 1,52 | up   |
| 6615210 | 7300446 | 1622872 | transmembrane protein 63c                                   | Tmem63c | 314332 | 1,11 | up   |
| 6679592 | 7300446 | 1622863 | transmembrane protein 63c                                   | Tmem63c | 314332 | 1,01 | up   |
| 6731751 | 7300446 | 1622866 | transmembrane protein 63c                                   | Tmem63c | 314332 | 1,03 | up   |
| 6737908 | 7300446 | 1622853 | transmembrane protein 63c                                   | Tmem63c | 314332 | 1,11 | down |
| 6741387 | 7300446 | 1622862 | transmembrane protein 63c                                   | Tmem63c | 314332 | 1,33 | up   |
| 5721045 | 7079673 | 1078748 | transmembrane protein 93                                    | Tmem93  | 287477 | 1,19 | down |
| 6096818 | 7079673 | 1078747 | transmembrane protein 93                                    | Tmem93  | 287477 | 3,79 | down |
| 6632723 | 7079673 | 1078746 | transmembrane protein 93                                    | Tmem93  | 287477 | 1,27 | up   |
| 6711187 | 7079673 | 1078748 | transmembrane protein 93                                    | Tmem93  | 287477 | 1,22 | down |
| 5636449 | 7220923 | 1425065 | transporter 1, ATP-binding cassette, sub-family B (MDR/TAP) | Tap1    | 24811  | 1,40 | up   |
| 5758490 | 7220923 | 1425064 | transporter 1, ATP-binding cassette, sub-family B (MDR/TAP) | Tap1    | 24811  | 1,01 | down |
| 5878895 | 7220923 | 1425067 | transporter 1, ATP-binding cassette, sub-family B (MDR/TAP) | Tap1    | 24811  | 1,25 | down |
| 6023947 | 7220923 | 1425060 | transporter 1, ATP-binding cassette, sub-family B (MDR/TAP) | Tap1    | 24811  | 1,13 | down |
| 6146251 | 7220923 | 1425058 | transporter 1, ATP-binding cassette, sub-family B (MDR/TAP) | Tap1    | 24811  | 2,21 | down |
| 6170893 | 7220923 | 1425059 | transporter 1, ATP-binding cassette, sub-family B (MDR/TAP) | Tap1    | 24811  | 1,40 | down |
| 6232105 | 7220923 | 1425068 | transporter 1, ATP-binding cassette, sub-family B (MDR/TAP) | Tap1    | 24811  | 2,05 | up   |
| 6277959 | 7220923 | 1425058 | transporter 1, ATP-binding cassette, sub-family B (MDR/TAP) | Tap1    | 24811  | 3,62 | down |
| 6377398 | 7220923 | 1425061 | transporter 1, ATP-binding cassette, sub-family B (MDR/TAP) | Tap1    | 24811  | 1,14 | down |
| 6474899 | 7220923 | 1425063 | transporter 1, ATP-binding cassette, sub-family B (MDR/TAP) | Tap1    | 24811  | 1,13 | up   |
| 6504909 | 7220923 | 1425062 | transporter 1, ATP-binding cassette, sub-family B (MDR/TAP) | Tap1    | 24811  | 1,35 | up   |
| 6556769 | 7220923 | 1425066 | transporter 1, ATP-binding cassette, sub-family B (MDR/TAP) | Tap1    | 24811  | 1,22 | up   |
| 5713592 | 7220903 | 1425027 | transporter 2, ATP-binding cassette, sub-family B (MDR/TAP) | Tap2    | 24812  | 1,10 | down |
| 5794466 | 7220903 | 1425026 | transporter 2, ATP-binding cassette, sub-family B (MDR/TAP) | Tap2    | 24812  | 1,37 | up   |
| 5847536 | 7220903 | 1425024 | transporter 2, ATP-binding cassette, sub-family B (MDR/TAP) | Tap2    | 24812  | 1,30 | down |

|         |         |         |                                                             |       |        |      |      |
|---------|---------|---------|-------------------------------------------------------------|-------|--------|------|------|
| 6021014 | 7220903 | 1425022 | transporter 2, ATP-binding cassette, sub-family B (MDR/TAP) | Tap2  | 24812  | 4,24 | down |
| 6022555 | 7220903 | 1425023 | transporter 2, ATP-binding cassette, sub-family B (MDR/TAP) | Tap2  | 24812  | 1,47 | down |
| 6102439 | 7220903 | 1425028 | transporter 2, ATP-binding cassette, sub-family B (MDR/TAP) | Tap2  | 24812  | 2,28 | down |
| 6112189 | 7220903 | 1425031 | transporter 2, ATP-binding cassette, sub-family B (MDR/TAP) | Tap2  | 24812  | 2,00 | up   |
| 6147728 | 7220903 | 1425032 | transporter 2, ATP-binding cassette, sub-family B (MDR/TAP) | Tap2  | 24812  | 1,70 | up   |
| 6249575 | 7220903 | 1425031 | transporter 2, ATP-binding cassette, sub-family B (MDR/TAP) | Tap2  | 24812  | 1,67 | up   |
| 6352081 | 7220903 | 1425025 | transporter 2, ATP-binding cassette, sub-family B (MDR/TAP) | Tap2  | 24812  | 4,61 | down |
| 6432766 | 7220903 | 1425029 | transporter 2, ATP-binding cassette, sub-family B (MDR/TAP) | Tap2  | 24812  | 1,34 | up   |
| 6591426 | 7220903 | 1425030 | transporter 2, ATP-binding cassette, sub-family B (MDR/TAP) | Tap2  | 24812  | 1,46 | up   |
| 6608000 | 7220903 | 1425021 | transporter 2, ATP-binding cassette, sub-family B (MDR/TAP) | Tap2  | 24812  | 3,67 | down |
| 6644934 | 7220903 | 1425030 | transporter 2, ATP-binding cassette, sub-family B (MDR/TAP) | Tap2  | 24812  | 2,45 | up   |
| 5651864 | 7176235 | 1315254 | Treacher Collins Franceschetti syndrome 1, homolog          | Tcof1 | 291571 | 1,47 | down |
| 5657146 | 7176235 | 1315234 | Treacher Collins Franceschetti syndrome 1, homolog          | Tcof1 | 291571 | 1,36 | down |
| 5685752 | 7176235 | 1315251 | Treacher Collins Franceschetti syndrome 1, homolog          | Tcof1 | 291571 | 2,32 | down |
| 5718546 | 7176235 | 1315265 | Treacher Collins Franceschetti syndrome 1, homolog          | Tcof1 | 291571 | 1,67 | up   |
| 5728989 | 7176235 | 1315234 | Treacher Collins Franceschetti syndrome 1, homolog          | Tcof1 | 291571 | 1,18 | down |
| 5773376 | 7176235 | 1315263 | Treacher Collins Franceschetti syndrome 1, homolog          | Tcof1 | 291571 | 1,52 | up   |
| 5815718 | 7176235 | 1315261 | Treacher Collins Franceschetti syndrome 1, homolog          | Tcof1 | 291571 | 1,87 | up   |
| 5849156 | 7176235 | 1315259 | Treacher Collins Franceschetti syndrome 1, homolog          | Tcof1 | 291571 | 1,05 | down |
| 5970434 | 7176235 | 1315248 | Treacher Collins Franceschetti syndrome 1, homolog          | Tcof1 | 291571 | 1,09 | down |
| 5970612 | 7176235 | 1315247 | Treacher Collins Franceschetti syndrome 1, homolog          | Tcof1 | 291571 | 1,00 | up   |
| 5999875 | 7176235 | 1315239 | Treacher Collins Franceschetti syndrome 1, homolog          | Tcof1 | 291571 | 1,07 | down |
| 6049442 | 7176235 | 1315251 | Treacher Collins Franceschetti syndrome 1, homolog          | Tcof1 | 291571 | 2,13 | down |
| 6135866 | 7176235 | 1315240 | Treacher Collins Franceschetti syndrome 1, homolog          | Tcof1 | 291571 | 1,08 | up   |
| 6176320 | 7176235 | 1315234 | Treacher Collins Franceschetti syndrome 1, homolog          | Tcof1 | 291571 | 1,01 | up   |
| 6201904 | 7176235 | 1315238 | Treacher Collins Franceschetti syndrome 1, homolog          | Tcof1 | 291571 | 1,56 | up   |
| 6208537 | 7176235 | 1315258 | Treacher Collins Franceschetti syndrome 1, homolog          | Tcof1 | 291571 | 1,43 | up   |
| 6244212 | 7176235 | 1315237 | Treacher Collins Franceschetti syndrome 1, homolog          | Tcof1 | 291571 | 1,05 | up   |
| 6252055 | 7176235 | 1315253 | Treacher Collins Franceschetti syndrome 1, homolog          | Tcof1 | 291571 | 1,66 | down |
| 6304421 | 7176235 | 1315253 | Treacher Collins Franceschetti syndrome 1, homolog          | Tcof1 | 291571 | 1,07 | down |
| 6306068 | 7176235 | 1315245 | Treacher Collins Franceschetti syndrome 1, homolog          | Tcof1 | 291571 | 1,19 | down |
| 6348167 | 7176235 | 1315253 | Treacher Collins Franceschetti syndrome 1, homolog          | Tcof1 | 291571 | 2,12 | down |
| 6366110 | 7176235 | 1315235 | Treacher Collins Franceschetti syndrome 1, homolog          | Tcof1 | 291571 | 1,09 | down |
| 6418756 | 7176235 | 1315244 | Treacher Collins Franceschetti syndrome 1, homolog          | Tcof1 | 291571 | 1,78 | up   |
| 6462545 | 7176235 | 1315246 | Treacher Collins Franceschetti syndrome 1, homolog          | Tcof1 | 291571 | 1,06 | up   |
| 6488217 | 7176235 | 1315249 | Treacher Collins Franceschetti syndrome 1, homolog          | Tcof1 | 291571 | 1,30 | up   |
| 6512429 | 7176235 | 1315243 | Treacher Collins Franceschetti syndrome 1, homolog          | Tcof1 | 291571 | 1,52 | up   |
| 6525907 | 7176235 | 1315238 | Treacher Collins Franceschetti syndrome 1, homolog          | Tcof1 | 291571 | 1,47 | up   |
| 6536355 | 7176235 | 1315255 | Treacher Collins Franceschetti syndrome 1, homolog          | Tcof1 | 291571 | 1,03 | up   |
| 6587262 | 7176235 | 1315257 | Treacher Collins Franceschetti syndrome 1, homolog          | Tcof1 | 291571 | 1,37 | down |
| 6597871 | 7176235 | 1315240 | Treacher Collins Franceschetti syndrome 1, homolog          | Tcof1 | 291571 | 1,25 | up   |
| 6645856 | 7176235 | 1315237 | Treacher Collins Franceschetti syndrome 1, homolog          | Tcof1 | 291571 | 1,26 | down |
| 6651982 | 7176235 | 1315250 | Treacher Collins Franceschetti syndrome 1, homolog          | Tcof1 | 291571 | 1,40 | up   |
| 5627015 | 7196803 | 1367339 | trinucleotide repeat containing 4                           | Tnrc4 | 499669 | 1,07 | down |
| 5647947 | 7196803 | 1367335 | trinucleotide repeat containing 4                           | Tnrc4 | 499669 | 1,04 | up   |
| 5706193 | 7196803 | 1367344 | trinucleotide repeat containing 4                           | Tnrc4 | 499669 | 1,24 | down |
| 5794572 | 7196803 | 1367338 | trinucleotide repeat containing 4                           | Tnrc4 | 499669 | 1,39 | up   |
| 5978364 | 7196803 | 1367328 | trinucleotide repeat containing 4                           | Tnrc4 | 499669 | 1,33 | down |
| 6010408 | 7196803 | 1367333 | trinucleotide repeat containing 4                           | Tnrc4 | 499669 | 1,21 | down |
| 6106186 | 7196803 | 1367337 | trinucleotide repeat containing 4                           | Tnrc4 | 499669 | 1,09 | up   |
| 6199845 | 7196803 | 1367328 | trinucleotide repeat containing 4                           | Tnrc4 | 499669 | 1,03 | down |
| 6302647 | 7196803 | 1367340 | trinucleotide repeat containing 4                           | Tnrc4 | 499669 | 1,02 | up   |
| 6416532 | 7196803 | 1367340 | trinucleotide repeat containing 4                           | Tnrc4 | 499669 | 1,03 | down |
| 6469936 | 7196803 | 1367328 | trinucleotide repeat containing 4                           | Tnrc4 | 499669 | 1,03 | down |
| 6506792 | 7196803 | 1367336 | trinucleotide repeat containing 4                           | Tnrc4 | 499669 | 1,21 | up   |
| 6623865 | 7196803 | 1367341 | trinucleotide repeat containing 4                           | Tnrc4 | 499669 | 1,11 | down |

|         |         |         |                                    |        |        |      |      |
|---------|---------|---------|------------------------------------|--------|--------|------|------|
| 6695509 | 7196803 | 1367329 | trinucleotide repeat containing 4  | Tnrc4  | 499669 | 1,15 | down |
| 6715579 | 7196803 | 1367328 | trinucleotide repeat containing 4  | Tnrc4  | 499669 | 3,17 | up   |
| 6730988 | 7196803 | 1367338 | trinucleotide repeat containing 4  | Tnrc4  | 499669 | 1,02 | down |
| 5661620 | 7036559 | 977261  | trinucleotide repeat containing 6a | Tnrc6a | 308971 | 1,03 | down |
| 5670141 | 7036559 | 977243  | trinucleotide repeat containing 6a | Tnrc6a | 308971 | 1,22 | up   |
| 5703317 | 7036559 | 977263  | trinucleotide repeat containing 6a | Tnrc6a | 308971 | 1,50 | down |
| 5714440 | 7036559 | 977243  | trinucleotide repeat containing 6a | Tnrc6a | 308971 | 1,23 | down |
| 5714656 | 7036559 | 977243  | trinucleotide repeat containing 6a | Tnrc6a | 308971 | 1,18 | down |
| 5717861 | 7036559 | 977251  | trinucleotide repeat containing 6a | Tnrc6a | 308971 | 1,04 | down |
| 5730607 | 7036559 | 977252  | trinucleotide repeat containing 6a | Tnrc6a | 308971 | 1,22 | up   |
| 5781894 | 7036559 | 977263  | trinucleotide repeat containing 6a | Tnrc6a | 308971 | 1,44 | down |
| 5798895 | 7036559 | 977261  | trinucleotide repeat containing 6a | Tnrc6a | 308971 | 1,08 | up   |
| 5808797 | 7036559 | 977263  | trinucleotide repeat containing 6a | Tnrc6a | 308971 | 1,03 | up   |
| 5824910 | 7036559 | 977237  | trinucleotide repeat containing 6a | Tnrc6a | 308971 | 1,34 | up   |
| 5841546 | 7036559 | 977243  | trinucleotide repeat containing 6a | Tnrc6a | 308971 | 2,56 | down |
| 5893394 | 7036559 | 977250  | trinucleotide repeat containing 6a | Tnrc6a | 308971 | 1,13 | up   |
| 5899270 | 7036559 | 977234  | trinucleotide repeat containing 6a | Tnrc6a | 308971 | 1,14 | up   |
| 5927489 | 7036559 | 977250  | trinucleotide repeat containing 6a | Tnrc6a | 308971 | 1,04 | down |
| 5933638 | 7036559 | 977243  | trinucleotide repeat containing 6a | Tnrc6a | 308971 | 1,16 | up   |
| 6078839 | 7036559 | 977242  | trinucleotide repeat containing 6a | Tnrc6a | 308971 | 1,19 | down |
| 6090810 | 7036559 | 977243  | trinucleotide repeat containing 6a | Tnrc6a | 308971 | 1,27 | down |
| 6092091 | 7036559 | 977261  | trinucleotide repeat containing 6a | Tnrc6a | 308971 | 1,17 | down |
| 6116213 | 7036559 | 977254  | trinucleotide repeat containing 6a | Tnrc6a | 308971 | 1,22 | down |
| 6128820 | 7036559 | 977240  | trinucleotide repeat containing 6a | Tnrc6a | 308971 | 1,03 | up   |
| 6166647 | 7036559 | 977241  | trinucleotide repeat containing 6a | Tnrc6a | 308971 | 1,22 | up   |
| 6274441 | 7036559 | 977245  | trinucleotide repeat containing 6a | Tnrc6a | 308971 | 1,39 | up   |
| 6276016 | 7036559 | 977242  | trinucleotide repeat containing 6a | Tnrc6a | 308971 | 1,01 | down |
| 6291054 | 7036559 | 977263  | trinucleotide repeat containing 6a | Tnrc6a | 308971 | 1,10 | down |
| 6331383 | 7036559 | 977262  | trinucleotide repeat containing 6a | Tnrc6a | 308971 | 1,00 | up   |
| 6332843 | 7036559 | 977259  | trinucleotide repeat containing 6a | Tnrc6a | 308971 | 1,37 | down |
| 6367673 | 7036559 | 977248  | trinucleotide repeat containing 6a | Tnrc6a | 308971 | 1,31 | down |
| 6386413 | 7036559 | 977258  | trinucleotide repeat containing 6a | Tnrc6a | 308971 | 1,13 | up   |
| 6399742 | 7036559 | 977244  | trinucleotide repeat containing 6a | Tnrc6a | 308971 | 1,24 | up   |
| 6433738 | 7036559 | 977256  | trinucleotide repeat containing 6a | Tnrc6a | 308971 | 1,28 | up   |
| 6441392 | 7036559 | 977255  | trinucleotide repeat containing 6a | Tnrc6a | 308971 | 1,13 | up   |
| 6526787 | 7036559 | 977247  | trinucleotide repeat containing 6a | Tnrc6a | 308971 | 1,23 | down |
| 6527144 | 7036559 | 977243  | trinucleotide repeat containing 6a | Tnrc6a | 308971 | 1,19 | down |
| 6577623 | 7036559 | 977258  | trinucleotide repeat containing 6a | Tnrc6a | 308971 | 1,09 | up   |
| 6648914 | 7036559 | 977243  | trinucleotide repeat containing 6a | Tnrc6a | 308971 | 1,01 | down |
| 6649987 | 7036559 | 977253  | trinucleotide repeat containing 6a | Tnrc6a | 308971 | 1,07 | up   |
| 6707375 | 7036559 | 977257  | trinucleotide repeat containing 6a | Tnrc6a | 308971 | 1,07 | up   |
| 6737320 | 7036559 | 977260  | trinucleotide repeat containing 6a | Tnrc6a | 308971 | 1,11 | up   |
| 5618135 | 7210263 | 1399744 | tripartite motif protein 2         | Trim2  | 361970 | 1,10 | up   |
| 5679470 | 7210263 | 1399754 | tripartite motif protein 2         | Trim2  | 361970 | 1,25 | up   |
| 5749568 | 7210263 | 1399734 | tripartite motif protein 2         | Trim2  | 361970 | 1,39 | up   |
| 5789546 | 7210263 | 1399745 | tripartite motif protein 2         | Trim2  | 361970 | 1,52 | up   |
| 5861243 | 7210263 | 1399737 | tripartite motif protein 2         | Trim2  | 361970 | 1,45 | down |
| 5931652 | 7210263 | 1399736 | tripartite motif protein 2         | Trim2  | 361970 | 1,05 | down |
| 6061872 | 7210263 | 1399744 | tripartite motif protein 2         | Trim2  | 361970 | 1,41 | down |
| 6157531 | 7210263 | 1399733 | tripartite motif protein 2         | Trim2  | 361970 | 1,04 | up   |
| 6362487 | 7210263 | 1399754 | tripartite motif protein 2         | Trim2  | 361970 | 1,07 | up   |
| 6387969 | 7210263 | 1399740 | tripartite motif protein 2         | Trim2  | 361970 | 1,33 | down |
| 6462082 | 7210263 | 1399733 | tripartite motif protein 2         | Trim2  | 361970 | 1,33 | down |
| 6521849 | 7210263 | 1399751 | tripartite motif protein 2         | Trim2  | 361970 | 1,22 | down |
| 6529071 | 7210263 | 1399740 | tripartite motif protein 2         | Trim2  | 361970 | 1,03 | up   |
| 6568633 | 7210263 | 1399745 | tripartite motif protein 2         | Trim2  | 361970 | 1,42 | up   |

|         |         |         |                                                                |        |        |      |      |
|---------|---------|---------|----------------------------------------------------------------|--------|--------|------|------|
| 6616720 | 7210263 | 1399741 | tripartite motif protein 2                                     | Trim2  | 361970 | 1,21 | up   |
| 6693550 | 7210263 | 1399759 | tripartite motif protein 2                                     | Trim2  | 361970 | 1,26 | down |
| 5680305 | 7068073 | 1051178 | tripartite motif-containing 11                                 | Trim11 | 360534 | 1,01 | up   |
| 5738312 | 7068073 | 1051169 | tripartite motif-containing 11                                 | Trim11 | 360534 | 1,19 | up   |
| 5761369 | 7068073 | 1051176 | tripartite motif-containing 11                                 | Trim11 | 360534 | 1,10 | up   |
| 5766232 | 7068073 | 1051170 | tripartite motif-containing 11                                 | Trim11 | 360534 | 1,12 | down |
| 5912492 | 7068073 | 1051166 | tripartite motif-containing 11                                 | Trim11 | 360534 | 1,27 | up   |
| 5926515 | 7068073 | 1051177 | tripartite motif-containing 11                                 | Trim11 | 360534 | 1,66 | up   |
| 6182221 | 7068073 | 1051176 | tripartite motif-containing 11                                 | Trim11 | 360534 | 2,18 | down |
| 6357814 | 7068073 | 1051166 | tripartite motif-containing 11                                 | Trim11 | 360534 | 1,33 | down |
| 6397169 | 7068073 | 1051177 | tripartite motif-containing 11                                 | Trim11 | 360534 | 1,21 | down |
| 6407513 | 7068073 | 1051166 | tripartite motif-containing 11                                 | Trim11 | 360534 | 1,19 | up   |
| 6700251 | 7068073 | 1051177 | tripartite motif-containing 11                                 | Trim11 | 360534 | 1,09 | down |
| 5871523 | 7216414 | 1413954 | tripartite motif-containing 39                                 | Trim39 | 309591 | 1,16 | down |
| 5883778 | 7216414 | 1413954 | tripartite motif-containing 39                                 | Trim39 | 309591 | 1,55 | up   |
| 5936703 | 7216414 | 1413955 | tripartite motif-containing 39                                 | Trim39 | 309591 | 1,10 | up   |
| 5952507 | 7216414 | 1413950 | tripartite motif-containing 39                                 | Trim39 | 309591 | 1,12 | down |
| 6043682 | 7216414 | 1413952 | tripartite motif-containing 39                                 | Trim39 | 309591 | 2,17 | down |
| 6058987 | 7216414 | 1413952 | tripartite motif-containing 39                                 | Trim39 | 309591 | 1,01 | up   |
| 6359484 | 7216414 | 1413949 | tripartite motif-containing 39                                 | Trim39 | 309591 | 1,10 | down |
| 6363067 | 7216414 | 1413953 | tripartite motif-containing 39                                 | Trim39 | 309591 | 1,06 | up   |
| 6578391 | 7216414 | 1413951 | tripartite motif-containing 39                                 | Trim39 | 309591 | 1,05 | up   |
| 5620636 | 7210780 | 1400871 | tripartite motif-containing 46                                 | Trim46 | 310641 | 1,01 | up   |
| 5725449 | 7210780 | 1400870 | tripartite motif-containing 46                                 | Trim46 | 310641 | 1,01 | down |
| 5766739 | 7210780 | 1400861 | tripartite motif-containing 46                                 | Trim46 | 310641 | 1,13 | up   |
| 5783940 | 7210780 | 1400872 | tripartite motif-containing 46                                 | Trim46 | 310641 | 1,43 | up   |
| 5811271 | 7210780 | 1400868 | tripartite motif-containing 46                                 | Trim46 | 310641 | 1,09 | up   |
| 5831985 | 7210780 | 1400869 | tripartite motif-containing 46                                 | Trim46 | 310641 | 1,35 | up   |
| 5855079 | 7210780 | 1400871 | tripartite motif-containing 46                                 | Trim46 | 310641 | 1,02 | up   |
| 6008254 | 7210780 | 1400871 | tripartite motif-containing 46                                 | Trim46 | 310641 | 2,12 | up   |
| 6119132 | 7210780 | 1400873 | tripartite motif-containing 46                                 | Trim46 | 310641 | 1,04 | down |
| 6256283 | 7210780 | 1400861 | tripartite motif-containing 46                                 | Trim46 | 310641 | 1,40 | up   |
| 6309664 | 7210780 | 1400871 | tripartite motif-containing 46                                 | Trim46 | 310641 | 1,17 | down |
| 6325872 | 7210780 | 1400876 | tripartite motif-containing 46                                 | Trim46 | 310641 | 1,01 | down |
| 6333745 | 7210780 | 1400871 | tripartite motif-containing 46                                 | Trim46 | 310641 | 1,18 | up   |
| 6437027 | 7210780 | 1400864 | tripartite motif-containing 46                                 | Trim46 | 310641 | 1,01 | up   |
| 6524803 | 7210780 | 1400872 | tripartite motif-containing 46                                 | Trim46 | 310641 | 1,16 | down |
| 6687103 | 7210780 | 1400867 | tripartite motif-containing 46                                 | Trim46 | 310641 | 1,51 | up   |
| 5638056 | 7182056 | 1330576 | tripartite motif-containing 67                                 | Trim67 | 307938 | 1,14 | down |
| 5672333 | 7182056 | 1330591 | tripartite motif-containing 67                                 | Trim67 | 307938 | 1,04 | up   |
| 5715022 | 7182056 | 1330592 | tripartite motif-containing 67                                 | Trim67 | 307938 | 1,00 | up   |
| 5819820 | 7182056 | 1330589 | tripartite motif-containing 67                                 | Trim67 | 307938 | 1,06 | down |
| 6063616 | 7182056 | 1330578 | tripartite motif-containing 67                                 | Trim67 | 307938 | 1,69 | down |
| 6100482 | 7182056 | 1330579 | tripartite motif-containing 67                                 | Trim67 | 307938 | 1,03 | down |
| 6182060 | 7182056 | 1330578 | tripartite motif-containing 67                                 | Trim67 | 307938 | 1,20 | down |
| 6214365 | 7182056 | 1330588 | tripartite motif-containing 67                                 | Trim67 | 307938 | 1,10 | up   |
| 6280606 | 7182056 | 1330583 | tripartite motif-containing 67                                 | Trim67 | 307938 | 1,02 | down |
| 6445940 | 7182056 | 1330578 | tripartite motif-containing 67                                 | Trim67 | 307938 | 1,65 | up   |
| 6486776 | 7182056 | 1330578 | tripartite motif-containing 67                                 | Trim67 | 307938 | 1,05 | down |
| 6619670 | 7182056 | 1330586 | tripartite motif-containing 67                                 | Trim67 | 307938 | 1,21 | down |
| 6629633 | 7182056 | 1330577 | tripartite motif-containing 67                                 | Trim67 | 307938 | 1,53 | up   |
| 6632098 | 7182056 | 1330584 | tripartite motif-containing 67                                 | Trim67 | 307938 | 1,23 | down |
| 6742158 | 7182056 | 1330590 | tripartite motif-containing 67                                 | Trim67 | 307938 | 1,02 | down |
| 6744687 | 7182056 | 1330587 | tripartite motif-containing 67                                 | Trim67 | 307938 | 1,04 | down |
| 5631739 | 7073673 | 1065086 | tRNA splicing endonuclease 54 homolog ( <i>S. cerevisiae</i> ) | Tsen54 | 690308 | 1,07 | up   |
| 5637894 | 7073673 | 1065085 | tRNA splicing endonuclease 54 homolog ( <i>S. cerevisiae</i> ) | Tsen54 | 690308 | 1,21 | down |

|         |         |         |                                                       |        |        |      |      |
|---------|---------|---------|-------------------------------------------------------|--------|--------|------|------|
| 5639476 | 7073673 | 1065091 | tRNA splicing endonuclease 54 homolog (S. cerevisiae) | Tsen54 | 690308 | 1,11 | down |
| 5673726 | 7073673 | 1065083 | tRNA splicing endonuclease 54 homolog (S. cerevisiae) | Tsen54 | 690308 | 1,10 | down |
| 5784970 | 7073673 | 1065087 | tRNA splicing endonuclease 54 homolog (S. cerevisiae) | Tsen54 | 690308 | 1,17 | up   |
| 5788574 | 7073673 | 1065091 | tRNA splicing endonuclease 54 homolog (S. cerevisiae) | Tsen54 | 690308 | 1,01 | down |
| 5831626 | 7073673 | 1065091 | tRNA splicing endonuclease 54 homolog (S. cerevisiae) | Tsen54 | 690308 | 1,02 | up   |
| 6063489 | 7073673 | 1065082 | tRNA splicing endonuclease 54 homolog (S. cerevisiae) | Tsen54 | 690308 | 1,19 | down |
| 6079521 | 7073673 | 1065088 | tRNA splicing endonuclease 54 homolog (S. cerevisiae) | Tsen54 | 690308 | 1,14 | up   |
| 6103970 | 7073673 | 1065088 | tRNA splicing endonuclease 54 homolog (S. cerevisiae) | Tsen54 | 690308 | 1,30 | up   |
| 6294180 | 7073673 | 1065084 | tRNA splicing endonuclease 54 homolog (S. cerevisiae) | Tsen54 | 690308 | 1,14 | down |
| 6336869 | 7073673 | 1065090 | tRNA splicing endonuclease 54 homolog (S. cerevisiae) | Tsen54 | 690308 | 1,17 | down |
| 6409352 | 7073673 | 1065089 | tRNA splicing endonuclease 54 homolog (S. cerevisiae) | Tsen54 | 690308 | 1,16 | up   |
| 6599291 | 7073673 | 1065089 | tRNA splicing endonuclease 54 homolog (S. cerevisiae) | Tsen54 | 690308 | 1,28 | up   |
| 5932114 | 7274794 | 1559324 | tropomodulin 1                                        | Tmod1  | 25566  | 1,85 | down |
| 5962699 | 7274794 | 1559328 | tropomodulin 1                                        | Tmod1  | 25566  | 1,52 | up   |
| 6016207 | 7274794 | 1559325 | tropomodulin 1                                        | Tmod1  | 25566  | 1,05 | down |
| 6066308 | 7274794 | 1559322 | tropomodulin 1                                        | Tmod1  | 25566  | 1,05 | up   |
| 6078022 | 7274794 | 1559321 | tropomodulin 1                                        | Tmod1  | 25566  | 1,70 | up   |
| 6248449 | 7274794 | 1559323 | tropomodulin 1                                        | Tmod1  | 25566  | 2,12 | up   |
| 6313185 | 7274794 | 1559320 | tropomodulin 1                                        | Tmod1  | 25566  | 1,25 | down |
| 6445486 | 7274794 | 1559329 | tropomodulin 1                                        | Tmod1  | 25566  | 1,27 | down |
| 6468139 | 7274794 | 1559319 | tropomodulin 1                                        | Tmod1  | 25566  | 1,02 | up   |
| 6570981 | 7274794 | 1559327 | tropomodulin 1                                        | Tmod1  | 25566  | 1,07 | down |
| 6645912 | 7274794 | 1559319 | tropomodulin 1                                        | Tmod1  | 25566  | 1,69 | up   |
| 6735896 | 7274794 | 1559326 | tropomodulin 1                                        | Tmod1  | 25566  | 1,16 | down |
| 5671480 | 7196361 | 1366440 | tropomyosin 3, gamma                                  | Tpm3   | 117557 | 1,16 | up   |
| 5780217 | 7196361 | 1366437 | tropomyosin 3, gamma                                  | Tpm3   | 117557 | 1,34 | down |
| 5848541 | 7196361 | 1366446 | tropomyosin 3, gamma                                  | Tpm3   | 117557 | 1,21 | up   |
| 5867743 | 7196361 | 1366438 | tropomyosin 3, gamma                                  | Tpm3   | 117557 | 1,00 | down |
| 6008122 | 7196361 | 1366437 | tropomyosin 3, gamma                                  | Tpm3   | 117557 | 1,05 | down |
| 6112649 | 7196361 | 1366444 | tropomyosin 3, gamma                                  | Tpm3   | 117557 | 1,85 | up   |
| 6186235 | 7196361 | 1366445 | tropomyosin 3, gamma                                  | Tpm3   | 117557 | 1,52 | up   |
| 6203554 | 7196361 | 1366441 | tropomyosin 3, gamma                                  | Tpm3   | 117557 | 1,23 | down |
| 6341586 | 7196361 | 1366443 | tropomyosin 3, gamma                                  | Tpm3   | 117557 | 1,09 | up   |
| 6420686 | 7196361 | 1366442 | tropomyosin 3, gamma                                  | Tpm3   | 117557 | 2,01 | down |
| 6448688 | 7196361 | 1366439 | tropomyosin 3, gamma                                  | Tpm3   | 117557 | 1,10 | up   |
| 6588435 | 7196361 | 1366436 | tropomyosin 3, gamma                                  | Tpm3   | 117557 | 1,36 | down |
| 6702652 | 7196361 | 1366444 | tropomyosin 3, gamma                                  | Tpm3   | 117557 | 1,34 | down |
| 5644389 | 7310471 | 1648615 | tryptophanyl-tRNA synthetase                          | Wars   | 314442 | 1,07 | down |
| 5756648 | 7310471 | 1648607 | tryptophanyl-tRNA synthetase                          | Wars   | 314442 | 1,01 | up   |
| 5794729 | 7310471 | 1648609 | tryptophanyl-tRNA synthetase                          | Wars   | 314442 | 1,24 | up   |
| 5846344 | 7310471 | 1648605 | tryptophanyl-tRNA synthetase                          | Wars   | 314442 | 3,06 | down |
| 5909556 | 7310471 | 1648615 | tryptophanyl-tRNA synthetase                          | Wars   | 314442 | 1,14 | up   |
| 6005564 | 7310471 | 1648612 | tryptophanyl-tRNA synthetase                          | Wars   | 314442 | 1,15 | up   |
| 6184263 | 7310471 | 1648611 | tryptophanyl-tRNA synthetase                          | Wars   | 314442 | 1,04 | down |
| 6208158 | 7310471 | 1648610 | tryptophanyl-tRNA synthetase                          | Wars   | 314442 | 1,32 | up   |
| 6264683 | 7310471 | 1648608 | tryptophanyl-tRNA synthetase                          | Wars   | 314442 | 1,14 | up   |
| 6275237 | 7310471 | 1648607 | tryptophanyl-tRNA synthetase                          | Wars   | 314442 | 1,04 | down |
| 6418357 | 7310471 | 1648615 | tryptophanyl-tRNA synthetase                          | Wars   | 314442 | 1,43 | up   |
| 6530870 | 7310471 | 1648606 | tryptophanyl-tRNA synthetase                          | Wars   | 314442 | 1,08 | down |
| 6600835 | 7310471 | 1648614 | tryptophanyl-tRNA synthetase                          | Wars   | 314442 | 2,20 | down |
| 6700053 | 7310471 | 1648613 | tryptophanyl-tRNA synthetase                          | Wars   | 314442 | 1,07 | down |
| 6216475 | 7356115 | 1760135 | tubulin tyrosine ligase-like family, member 4         | Ttl4   | 690512 | 1,04 | up   |
| 5625501 | 7200545 | 1376893 | tubulin tyrosine ligase-like family, member 7         | Ttl7   | 310982 | 1,16 | down |
| 5778388 | 7200545 | 1376936 | tubulin tyrosine ligase-like family, member 7         | Ttl7   | 310982 | 1,41 | down |
| 5811139 | 7200545 | 1376919 | tubulin tyrosine ligase-like family, member 7         | Ttl7   | 310982 | 1,48 | down |
| 5874200 | 7200545 | 1376936 | tubulin tyrosine ligase-like family, member 7         | Ttl7   | 310982 | 1,57 | down |

|         |         |         |                                               |         |        |      |      |
|---------|---------|---------|-----------------------------------------------|---------|--------|------|------|
| 5988004 | 7200545 | 1376892 | tubulin tyrosine ligase-like family, member 7 | Ttl17   | 310982 | 1,11 | up   |
| 6093533 | 7200545 | 1376918 | tubulin tyrosine ligase-like family, member 7 | Ttl17   | 310982 | 1,36 | down |
| 6124421 | 7200545 | 1376895 | tubulin tyrosine ligase-like family, member 7 | Ttl17   | 310982 | 1,09 | up   |
| 6166512 | 7200545 | 1376930 | tubulin tyrosine ligase-like family, member 7 | Ttl17   | 310982 | 1,28 | down |
| 6241152 | 7200545 | 1376889 | tubulin tyrosine ligase-like family, member 7 | Ttl17   | 310982 | 1,15 | up   |
| 6306509 | 7200545 | 1376896 | tubulin tyrosine ligase-like family, member 7 | Ttl17   | 310982 | 1,02 | down |
| 6486107 | 7200545 | 1376926 | tubulin tyrosine ligase-like family, member 7 | Ttl17   | 310982 | 1,25 | up   |
| 6681175 | 7200545 | 1376893 | tubulin tyrosine ligase-like family, member 7 | Ttl17   | 310982 | 1,44 | down |
| 6740025 | 7200545 | 1376887 | tubulin tyrosine ligase-like family, member 7 | Ttl17   | 310982 | 1,53 | up   |
| 5633824 | 7072231 | 1061425 | tubulin, gamma 1                              | Tubg1   | 252921 | 2,26 | down |
| 5686504 | 7072231 | 1061413 | tubulin, gamma 1                              | Tubg1   | 252921 | 1,64 | up   |
| 5812274 | 7072231 | 1061420 | tubulin, gamma 1                              | Tubg1   | 252921 | 1,28 | up   |
| 5840761 | 7072231 | 1061423 | tubulin, gamma 1                              | Tubg1   | 252921 | 1,50 | down |
| 5898153 | 7072231 | 1061424 | tubulin, gamma 1                              | Tubg1   | 252921 | 1,40 | up   |
| 5912811 | 7072231 | 1061419 | tubulin, gamma 1                              | Tubg1   | 252921 | 1,05 | up   |
| 6046511 | 7072231 | 1061418 | tubulin, gamma 1                              | Tubg1   | 252921 | 1,11 | down |
| 6096662 | 7072231 | 1061416 | tubulin, gamma 1                              | Tubg1   | 252921 | 1,18 | down |
| 6149494 | 7072231 | 1061415 | tubulin, gamma 1                              | Tubg1   | 252921 | 1,05 | up   |
| 6555854 | 7072231 | 1061414 | tubulin, gamma 1                              | Tubg1   | 252921 | 1,27 | up   |
| 6569904 | 7072231 | 1061417 | tubulin, gamma 1                              | Tubg1   | 252921 | 1,11 | down |
| 6601273 | 7072231 | 1061421 | tubulin, gamma 1                              | Tubg1   | 252921 | 1,11 | up   |
| 6627694 | 7072231 | 1061422 | tubulin, gamma 1                              | Tubg1   | 252921 | 1,20 | down |
| 5635739 | 7032074 | 965624  | tubulin, gamma complex associated protein 5   | Tubgcp5 | 308663 | 1,09 | up   |
| 5744436 | 7032074 | 965630  | tubulin, gamma complex associated protein 5   | Tubgcp5 | 308663 | 1,22 | up   |
| 5759993 | 7032074 | 965628  | tubulin, gamma complex associated protein 5   | Tubgcp5 | 308663 | 1,40 | up   |
| 5798289 | 7032074 | 965631  | tubulin, gamma complex associated protein 5   | Tubgcp5 | 308663 | 1,28 | down |
| 5842084 | 7032074 | 965629  | tubulin, gamma complex associated protein 5   | Tubgcp5 | 308663 | 1,09 | up   |
| 5935065 | 7032074 | 965621  | tubulin, gamma complex associated protein 5   | Tubgcp5 | 308663 | 2,40 | down |
| 5940700 | 7032074 | 965625  | tubulin, gamma complex associated protein 5   | Tubgcp5 | 308663 | 1,14 | up   |
| 6076372 | 7032074 | 965622  | tubulin, gamma complex associated protein 5   | Tubgcp5 | 308663 | 1,49 | up   |
| 6086398 | 7032074 | 965627  | tubulin, gamma complex associated protein 5   | Tubgcp5 | 308663 | 1,17 | up   |
| 6102074 | 7032074 | 965626  | tubulin, gamma complex associated protein 5   | Tubgcp5 | 308663 | 1,16 | up   |
| 6136648 | 7032074 | 965630  | tubulin, gamma complex associated protein 5   | Tubgcp5 | 308663 | 1,03 | up   |
| 6148834 | 7032074 | 965632  | tubulin, gamma complex associated protein 5   | Tubgcp5 | 308663 | 1,13 | down |
| 6172895 | 7032074 | 965629  | tubulin, gamma complex associated protein 5   | Tubgcp5 | 308663 | 1,51 | down |
| 6175412 | 7032074 | 965638  | tubulin, gamma complex associated protein 5   | Tubgcp5 | 308663 | 1,42 | up   |
| 6246811 | 7032074 | 965637  | tubulin, gamma complex associated protein 5   | Tubgcp5 | 308663 | 1,23 | down |
| 6247139 | 7032074 | 965640  | tubulin, gamma complex associated protein 5   | Tubgcp5 | 308663 | 1,18 | down |
| 6316142 | 7032074 | 965626  | tubulin, gamma complex associated protein 5   | Tubgcp5 | 308663 | 1,06 | up   |
| 6318907 | 7032074 | 965619  | tubulin, gamma complex associated protein 5   | Tubgcp5 | 308663 | 1,16 | up   |
| 6428212 | 7032074 | 965617  | tubulin, gamma complex associated protein 5   | Tubgcp5 | 308663 | 1,01 | down |
| 6479394 | 7032074 | 965623  | tubulin, gamma complex associated protein 5   | Tubgcp5 | 308663 | 1,11 | down |
| 6482501 | 7032074 | 965635  | tubulin, gamma complex associated protein 5   | Tubgcp5 | 308663 | 1,16 | down |
| 6491761 | 7032074 | 965639  | tubulin, gamma complex associated protein 5   | Tubgcp5 | 308663 | 1,17 | up   |
| 6512588 | 7032074 | 965634  | tubulin, gamma complex associated protein 5   | Tubgcp5 | 308663 | 1,01 | down |
| 6540066 | 7032074 | 965620  | tubulin, gamma complex associated protein 5   | Tubgcp5 | 308663 | 1,16 | up   |
| 6547136 | 7032074 | 965633  | tubulin, gamma complex associated protein 5   | Tubgcp5 | 308663 | 1,03 | up   |
| 6553453 | 7032074 | 965630  | tubulin, gamma complex associated protein 5   | Tubgcp5 | 308663 | 1,25 | down |
| 6686374 | 7032074 | 965640  | tubulin, gamma complex associated protein 5   | Tubgcp5 | 308663 | 2,88 | down |
| 6695502 | 7032074 | 965636  | tubulin, gamma complex associated protein 5   | Tubgcp5 | 308663 | 1,04 | up   |
| 5770152 | 7369712 | 1794821 | tubulin-specific chaperone d                  | Tbcd    | 360683 | 1,36 | down |
| 5780176 | 7369712 | 1794850 | tubulin-specific chaperone d                  | Tbcd    | 360683 | 1,08 | down |
| 5793817 | 7369712 | 1794836 | tubulin-specific chaperone d                  | Tbcd    | 360683 | 1,53 | down |
| 5824699 | 7369712 | 1794839 | tubulin-specific chaperone d                  | Tbcd    | 360683 | 1,14 | down |
| 5842790 | 7369712 | 1794849 | tubulin-specific chaperone d                  | Tbcd    | 360683 | 1,44 | up   |
| 5883697 | 7369712 | 1794837 | tubulin-specific chaperone d                  | Tbcd    | 360683 | 1,37 | down |

|         |         |         |                                             |         |        |      |      |
|---------|---------|---------|---------------------------------------------|---------|--------|------|------|
| 5920456 | 7369712 | 1794846 | tubulin-specific chaperone d                | Tbcd    | 360683 | 1,30 | down |
| 6056054 | 7369712 | 1794827 | tubulin-specific chaperone d                | Tbcd    | 360683 | 1,10 | up   |
| 6072363 | 7369712 | 1794819 | tubulin-specific chaperone d                | Tbcd    | 360683 | 1,21 | down |
| 6097007 | 7369712 | 1794842 | tubulin-specific chaperone d                | Tbcd    | 360683 | 1,38 | down |
| 6172375 | 7369712 | 1794840 | tubulin-specific chaperone d                | Tbcd    | 360683 | 1,84 | down |
| 6263029 | 7369712 | 1794826 | tubulin-specific chaperone d                | Tbcd    | 360683 | 1,13 | down |
| 6273348 | 7369712 | 1794823 | tubulin-specific chaperone d                | Tbcd    | 360683 | 1,01 | down |
| 6299880 | 7369712 | 1794844 | tubulin-specific chaperone d                | Tbcd    | 360683 | 1,29 | down |
| 6300729 | 7369712 | 1794820 | tubulin-specific chaperone d                | Tbcd    | 360683 | 1,24 | up   |
| 6302331 | 7369712 | 1794822 | tubulin-specific chaperone d                | Tbcd    | 360683 | 1,36 | up   |
| 6330312 | 7369712 | 1794825 | tubulin-specific chaperone d                | Tbcd    | 360683 | 1,32 | down |
| 6415245 | 7369712 | 1794849 | tubulin-specific chaperone d                | Tbcd    | 360683 | 1,10 | up   |
| 6530352 | 7369712 | 1794824 | tubulin-specific chaperone d                | Tbcd    | 360683 | 1,00 | up   |
| 6544771 | 7369712 | 1794817 | tubulin-specific chaperone d                | Tbcd    | 360683 | 1,48 | up   |
| 6644162 | 7369712 | 1794847 | tubulin-specific chaperone d                | Tbcd    | 360683 | 1,01 | up   |
| 5628653 | 7291393 | 1600079 | tubulointerstitial nephritis antigen-like 1 | Tinagl1 | 94174  | 1,08 | up   |
| 5653746 | 7291393 | 1600082 | tubulointerstitial nephritis antigen-like 1 | Tinagl1 | 94174  | 1,02 | up   |
| 5707764 | 7291393 | 1600091 | tubulointerstitial nephritis antigen-like 1 | Tinagl1 | 94174  | 1,38 | up   |
| 5716756 | 7291393 | 1600090 | tubulointerstitial nephritis antigen-like 1 | Tinagl1 | 94174  | 2,08 | down |
| 5725802 | 7291393 | 1600088 | tubulointerstitial nephritis antigen-like 1 | Tinagl1 | 94174  | 1,41 | down |
| 5921791 | 7291393 | 1600085 | tubulointerstitial nephritis antigen-like 1 | Tinagl1 | 94174  | 1,57 | down |
| 5924433 | 7291393 | 1600080 | tubulointerstitial nephritis antigen-like 1 | Tinagl1 | 94174  | 1,15 | down |
| 5952775 | 7291393 | 1600086 | tubulointerstitial nephritis antigen-like 1 | Tinagl1 | 94174  | 1,19 | up   |
| 5993218 | 7291393 | 1600084 | tubulointerstitial nephritis antigen-like 1 | Tinagl1 | 94174  | 1,06 | down |
| 6074376 | 7291393 | 1600079 | tubulointerstitial nephritis antigen-like 1 | Tinagl1 | 94174  | 1,02 | down |
| 6117039 | 7291393 | 1600081 | tubulointerstitial nephritis antigen-like 1 | Tinagl1 | 94174  | 1,52 | down |
| 6132376 | 7291393 | 1600083 | tubulointerstitial nephritis antigen-like 1 | Tinagl1 | 94174  | 1,09 | up   |
| 6172338 | 7291393 | 1600083 | tubulointerstitial nephritis antigen-like 1 | Tinagl1 | 94174  | 1,13 | down |
| 6369826 | 7291393 | 1600087 | tubulointerstitial nephritis antigen-like 1 | Tinagl1 | 94174  | 1,17 | down |
| 6590448 | 7291393 | 1600086 | tubulointerstitial nephritis antigen-like 1 | Tinagl1 | 94174  | 1,32 | down |
| 6635471 | 7291393 | 1600091 | tubulointerstitial nephritis antigen-like 1 | Tinagl1 | 94174  | 1,28 | up   |
| 6677061 | 7291393 | 1600091 | tubulointerstitial nephritis antigen-like 1 | Tinagl1 | 94174  | 1,60 | up   |
| 6685997 | 7291393 | 1600089 | tubulointerstitial nephritis antigen-like 1 | Tinagl1 | 94174  | 1,04 | down |
| 6739870 | 7050167 | 1009829 | tudor domain containing 12                  | Tdrd12  | 292813 | 1,71 | down |
| 5709207 | 7112671 | 1158956 | tudor domain containing 5                   | Tdrd5   | 289129 | 1,16 | up   |
| 5719748 | 7112671 | 1158961 | tudor domain containing 5                   | Tdrd5   | 289129 | 1,22 | down |
| 5747067 | 7112671 | 1158957 | tudor domain containing 5                   | Tdrd5   | 289129 | 1,04 | down |
| 5788872 | 7112671 | 1158972 | tudor domain containing 5                   | Tdrd5   | 289129 | 1,14 | up   |
| 5859053 | 7112671 | 1158971 | tudor domain containing 5                   | Tdrd5   | 289129 | 1,36 | up   |
| 5886450 | 7112671 | 1158966 | tudor domain containing 5                   | Tdrd5   | 289129 | 1,05 | up   |
| 5886902 | 7112671 | 1158958 | tudor domain containing 5                   | Tdrd5   | 289129 | 1,83 | down |
| 5936808 | 7112671 | 1158960 | tudor domain containing 5                   | Tdrd5   | 289129 | 1,84 | up   |
| 6080235 | 7112671 | 1158974 | tudor domain containing 5                   | Tdrd5   | 289129 | 1,07 | down |
| 6088366 | 7112671 | 1158967 | tudor domain containing 5                   | Tdrd5   | 289129 | 1,20 | down |
| 6139467 | 7112671 | 1158966 | tudor domain containing 5                   | Tdrd5   | 289129 | 1,07 | down |
| 6161807 | 7112671 | 1158972 | tudor domain containing 5                   | Tdrd5   | 289129 | 1,55 | down |
| 6325130 | 7112671 | 1158968 | tudor domain containing 5                   | Tdrd5   | 289129 | 1,70 | down |
| 6385541 | 7112671 | 1158969 | tudor domain containing 5                   | Tdrd5   | 289129 | 1,57 | down |
| 6407684 | 7112671 | 1158956 | tudor domain containing 5                   | Tdrd5   | 289129 | 1,11 | up   |
| 6435036 | 7112671 | 1158968 | tudor domain containing 5                   | Tdrd5   | 289129 | 1,24 | down |
| 6450947 | 7112671 | 1158963 | tudor domain containing 5                   | Tdrd5   | 289129 | 1,26 | up   |
| 6474722 | 7112671 | 1158973 | tudor domain containing 5                   | Tdrd5   | 289129 | 1,47 | down |
| 6522071 | 7112671 | 1158961 | tudor domain containing 5                   | Tdrd5   | 289129 | 1,06 | down |
| 6627173 | 7112671 | 1158959 | tudor domain containing 5                   | Tdrd5   | 289129 | 1,69 | up   |
| 6699432 | 7112671 | 1158965 | tudor domain containing 5                   | Tdrd5   | 289129 | 1,07 | up   |
| 6729097 | 7112671 | 1158970 | tudor domain containing 5                   | Tdrd5   | 289129 | 1,95 | down |



|         |         |         |                                                                                  |           |        |      |      |
|---------|---------|---------|----------------------------------------------------------------------------------|-----------|--------|------|------|
| 5624946 | 7302018 | 1626971 | tudor domain containing 9                                                        | Tdrd9     | 299343 | 1,04 | down |
| 5635793 | 7302018 | 1626966 | tudor domain containing 9                                                        | Tdrd9     | 299343 | 1,40 | down |
| 5774882 | 7302018 | 1626989 | tudor domain containing 9                                                        | Tdrd9     | 299343 | 1,07 | up   |
| 5782843 | 7302018 | 1626985 | tudor domain containing 9                                                        | Tdrd9     | 299343 | 1,29 | down |
| 5810784 | 7302018 | 1626965 | tudor domain containing 9                                                        | Tdrd9     | 299343 | 1,05 | up   |
| 5824550 | 7302018 | 1626995 | tudor domain containing 9                                                        | Tdrd9     | 299343 | 1,28 | up   |
| 5878629 | 7302018 | 1626995 | tudor domain containing 9                                                        | Tdrd9     | 299343 | 1,05 | up   |
| 5995995 | 7302018 | 1626983 | tudor domain containing 9                                                        | Tdrd9     | 299343 | 1,01 | down |
| 6005567 | 7302018 | 1626982 | tudor domain containing 9                                                        | Tdrd9     | 299343 | 2,13 | down |
| 6037364 | 7302018 | 1626976 | tudor domain containing 9                                                        | Tdrd9     | 299343 | 1,23 | down |
| 6075245 | 7302018 | 1626979 | tudor domain containing 9                                                        | Tdrd9     | 299343 | 1,59 | up   |
| 6129252 | 7302018 | 1626968 | tudor domain containing 9                                                        | Tdrd9     | 299343 | 1,18 | down |
| 6136993 | 7302018 | 1626982 | tudor domain containing 9                                                        | Tdrd9     | 299343 | 1,38 | up   |
| 6146060 | 7302018 | 1626990 | tudor domain containing 9                                                        | Tdrd9     | 299343 | 1,21 | down |
| 6177487 | 7302018 | 1626969 | tudor domain containing 9                                                        | Tdrd9     | 299343 | 1,05 | down |
| 6202323 | 7302018 | 1626988 | tudor domain containing 9                                                        | Tdrd9     | 299343 | 1,23 | down |
| 6202668 | 7302018 | 1626974 | tudor domain containing 9                                                        | Tdrd9     | 299343 | 1,28 | up   |
| 6261155 | 7302018 | 1626975 | tudor domain containing 9                                                        | Tdrd9     | 299343 | 1,12 | down |
| 6301140 | 7302018 | 1626986 | tudor domain containing 9                                                        | Tdrd9     | 299343 | 1,18 | down |
| 6365309 | 7302018 | 1626977 | tudor domain containing 9                                                        | Tdrd9     | 299343 | 1,57 | down |
| 6366733 | 7302018 | 1626982 | tudor domain containing 9                                                        | Tdrd9     | 299343 | 1,05 | up   |
| 6390626 | 7302018 | 1626992 | tudor domain containing 9                                                        | Tdrd9     | 299343 | 1,05 | up   |
| 6434211 | 7302018 | 1626981 | tudor domain containing 9                                                        | Tdrd9     | 299343 | 1,69 | up   |
| 6446573 | 7302018 | 1626991 | tudor domain containing 9                                                        | Tdrd9     | 299343 | 1,03 | down |
| 6448190 | 7302018 | 1626980 | tudor domain containing 9                                                        | Tdrd9     | 299343 | 1,11 | up   |
| 6451337 | 7302018 | 1626976 | tudor domain containing 9                                                        | Tdrd9     | 299343 | 1,18 | up   |
| 6547581 | 7302018 | 1626993 | tudor domain containing 9                                                        | Tdrd9     | 299343 | 1,27 | down |
| 6572301 | 7302018 | 1626976 | tudor domain containing 9                                                        | Tdrd9     | 299343 | 1,39 | down |
| 6574364 | 7302018 | 1626982 | tudor domain containing 9                                                        | Tdrd9     | 299343 | 1,13 | down |
| 6595520 | 7302018 | 1626970 | tudor domain containing 9                                                        | Tdrd9     | 299343 | 1,14 | up   |
| 6646438 | 7302018 | 1626978 | tudor domain containing 9                                                        | Tdrd9     | 299343 | 1,38 | up   |
| 6678353 | 7302018 | 1626982 | tudor domain containing 9                                                        | Tdrd9     | 299343 | 1,05 | up   |
| 6694553 | 7302018 | 1626994 | tudor domain containing 9                                                        | Tdrd9     | 299343 | 1,08 | up   |
| 6745730 | 7302018 | 1626987 | tudor domain containing 9                                                        | Tdrd9     | 299343 | 1,19 | down |
| 6156149 | 7140313 | 1226683 | tumor necrosis factor (ligand) superfamily, member 11                            | Tnfsf11   | 117516 | 1,06 | up   |
| 6213846 | 7140313 | 1226684 | tumor necrosis factor (ligand) superfamily, member 11                            | Tnfsf11   | 117516 | 1,63 | down |
| 6248061 | 7140313 | 1226686 | tumor necrosis factor (ligand) superfamily, member 11                            | Tnfsf11   | 117516 | 1,11 | up   |
| 6526844 | 7140313 | 1226683 | tumor necrosis factor (ligand) superfamily, member 11                            | Tnfsf11   | 117516 | 1,01 | up   |
| 6609347 | 7140313 | 1226685 | tumor necrosis factor (ligand) superfamily, member 11                            | Tnfsf11   | 117516 | 2,37 | up   |
| 6668399 | 7140313 | 1226687 | tumor necrosis factor (ligand) superfamily, member 11                            | Tnfsf11   | 117516 | 1,20 | down |
| 5863008 | 7103811 | 1137068 | Tumor necrosis factor receptor superfamily, member 11a                           | Tnfrsf11a | 498206 | 2,05 | down |
| 5886342 | 7103811 | 1137067 | Tumor necrosis factor receptor superfamily, member 11a                           | Tnfrsf11a | 498206 | 1,33 | down |
| 6742000 | 7103811 | 1137037 | Tumor necrosis factor receptor superfamily, member 11a                           | Tnfrsf11a | 498206 | 1,13 | up   |
| 5673783 | 7293664 | 1605464 | tumor necrosis factor receptor superfamily, member 14 (herpesvirus entry mediato | Tnfrsf14  | 366518 | 2,08 | up   |
| 5704360 | 7293664 | 1605467 | tumor necrosis factor receptor superfamily, member 14 (herpesvirus entry mediato | Tnfrsf14  | 366518 | 1,02 | up   |
| 5706968 | 7293664 | 1605467 | tumor necrosis factor receptor superfamily, member 14 (herpesvirus entry mediato | Tnfrsf14  | 366518 | 1,04 | up   |
| 5747646 | 7293664 | 1605468 | tumor necrosis factor receptor superfamily, member 14 (herpesvirus entry mediato | Tnfrsf14  | 366518 | 1,10 | down |
| 5902714 | 7293664 | 1605462 | tumor necrosis factor receptor superfamily, member 14 (herpesvirus entry mediato | Tnfrsf14  | 366518 | 1,53 | up   |
| 5953931 | 7293664 | 1605463 | tumor necrosis factor receptor superfamily, member 14 (herpesvirus entry mediato | Tnfrsf14  | 366518 | 1,23 | down |
| 6047374 | 7293664 | 1605469 | tumor necrosis factor receptor superfamily, member 14 (herpesvirus entry mediato | Tnfrsf14  | 366518 | 1,20 | down |
| 6116432 | 7293664 | 1605466 | tumor necrosis factor receptor superfamily, member 14 (herpesvirus entry mediato | Tnfrsf14  | 366518 | 1,07 | up   |
| 6198818 | 7293664 | 1605465 | tumor necrosis factor receptor superfamily, member 14 (herpesvirus entry mediato | Tnfrsf14  | 366518 | 1,03 | up   |
| 6328648 | 7293664 | 1605469 | tumor necrosis factor receptor superfamily, member 14 (herpesvirus entry mediato | Tnfrsf14  | 366518 | 1,61 | down |
| 6600266 | 7293664 | 1605462 | tumor necrosis factor receptor superfamily, member 14 (herpesvirus entry mediato | Tnfrsf14  | 366518 | 2,16 | up   |
| 5718733 | 7292877 | 1603516 | tumor necrosis factor receptor superfamily, member 1b                            | Tnfrsf1b  | 156767 | 1,25 | up   |
| 5801072 | 7292877 | 1603520 | tumor necrosis factor receptor superfamily, member 1b                            | Tnfrsf1b  | 156767 | 1,47 | up   |

|         |         |         |                                                       |          |        |      |      |
|---------|---------|---------|-------------------------------------------------------|----------|--------|------|------|
| 5827190 | 7292877 | 1603519 | tumor necrosis factor receptor superfamily, member 1b | Tnfrsf1b | 156767 | 1,22 | down |
| 5906009 | 7292877 | 1603513 | tumor necrosis factor receptor superfamily, member 1b | Tnfrsf1b | 156767 | 1,04 | down |
| 6002680 | 7292877 | 1603512 | tumor necrosis factor receptor superfamily, member 1b | Tnfrsf1b | 156767 | 1,34 | down |
| 6015617 | 7292877 | 1603522 | tumor necrosis factor receptor superfamily, member 1b | Tnfrsf1b | 156767 | 1,02 | down |
| 6041007 | 7292877 | 1603521 | tumor necrosis factor receptor superfamily, member 1b | Tnfrsf1b | 156767 | 1,09 | down |
| 6093010 | 7292877 | 1603517 | tumor necrosis factor receptor superfamily, member 1b | Tnfrsf1b | 156767 | 1,27 | up   |
| 6102649 | 7292877 | 1603512 | tumor necrosis factor receptor superfamily, member 1b | Tnfrsf1b | 156767 | 1,17 | up   |
| 6152522 | 7292877 | 1603518 | tumor necrosis factor receptor superfamily, member 1b | Tnfrsf1b | 156767 | 2,38 | up   |
| 6321715 | 7292877 | 1603512 | tumor necrosis factor receptor superfamily, member 1b | Tnfrsf1b | 156767 | 1,24 | up   |
| 6434114 | 7292877 | 1603513 | tumor necrosis factor receptor superfamily, member 1b | Tnfrsf1b | 156767 | 1,38 | down |
| 6472250 | 7292877 | 1603514 | tumor necrosis factor receptor superfamily, member 1b | Tnfrsf1b | 156767 | 1,21 | down |
| 6599834 | 7292877 | 1603512 | tumor necrosis factor receptor superfamily, member 1b | Tnfrsf1b | 156767 | 1,05 | down |
| 6656104 | 7292877 | 1603515 | tumor necrosis factor receptor superfamily, member 1b | Tnfrsf1b | 156767 | 1,56 | down |
| 5728043 | 7191983 | 1355175 | tumor protein D52                                     | Tpd52    | 294900 | 1,28 | up   |
| 5874649 | 7191983 | 1355175 | tumor protein D52                                     | Tpd52    | 294900 | 1,09 | up   |
| 5932505 | 7191983 | 1355173 | tumor protein D52                                     | Tpd52    | 294900 | 2,12 | down |
| 6325826 | 7191983 | 1355164 | tumor protein D52                                     | Tpd52    | 294900 | 1,37 | up   |
| 6398008 | 7191983 | 1355175 | tumor protein D52                                     | Tpd52    | 294900 | 1,00 | down |
| 6621794 | 7191983 | 1355161 | tumor protein D52                                     | Tpd52    | 294900 | 1,27 | down |
| 6645823 | 7191983 | 1355164 | tumor protein D52                                     | Tpd52    | 294900 | 1,13 | down |
| 6679473 | 7191983 | 1355166 | tumor protein D52                                     | Tpd52    | 294900 | 1,05 | up   |
| 6715811 | 7191983 | 1355168 | tumor protein D52                                     | Tpd52    | 294900 | 1,03 | down |
| 5723769 | 7294897 | 1608488 | tumor-associated calcium signal transducer 1          | Tacstd1  | 171577 | 1,03 | up   |
| 5887689 | 7294897 | 1608485 | tumor-associated calcium signal transducer 1          | Tacstd1  | 171577 | 2,36 | down |
| 5941351 | 7294897 | 1608480 | tumor-associated calcium signal transducer 1          | Tacstd1  | 171577 | 1,25 | down |
| 6072487 | 7294897 | 1608483 | tumor-associated calcium signal transducer 1          | Tacstd1  | 171577 | 1,27 | down |
| 6089778 | 7294897 | 1608481 | tumor-associated calcium signal transducer 1          | Tacstd1  | 171577 | 1,11 | down |
| 6295817 | 7294897 | 1608483 | tumor-associated calcium signal transducer 1          | Tacstd1  | 171577 | 1,06 | down |
| 6351629 | 7294897 | 1608482 | tumor-associated calcium signal transducer 1          | Tacstd1  | 171577 | 1,18 | up   |
| 6515629 | 7294897 | 1608484 | tumor-associated calcium signal transducer 1          | Tacstd1  | 171577 | 1,02 | up   |
| 6532805 | 7294897 | 1608487 | tumor-associated calcium signal transducer 1          | Tacstd1  | 171577 | 1,37 | up   |
| 6585290 | 7294897 | 1608488 | tumor-associated calcium signal transducer 1          | Tacstd1  | 171577 | 1,07 | down |
| 6691628 | 7294897 | 1608486 | tumor-associated calcium signal transducer 1          | Tacstd1  | 171577 | 1,03 | down |
| 5729074 | 7297292 | 1614693 | TWIST neighbor                                        | Twistnb  | 362728 | 1,35 | up   |
| 6109250 | 7297292 | 1614693 | TWIST neighbor                                        | Twistnb  | 362728 | 1,18 | up   |
| 6221009 | 7297292 | 1614693 | TWIST neighbor                                        | Twistnb  | 362728 | 1,36 | up   |
| 6565380 | 7297292 | 1614691 | TWIST neighbor                                        | Twistnb  | 362728 | 1,22 | down |
| 6588231 | 7297292 | 1614690 | TWIST neighbor                                        | Twistnb  | 362728 | 2,50 | down |
| 6646044 | 7297292 | 1614693 | TWIST neighbor                                        | Twistnb  | 362728 | 1,22 | up   |
| 6661480 | 7297292 | 1614693 | TWIST neighbor                                        | Twistnb  | 362728 | 1,10 | down |
| 6680336 | 7297292 | 1614692 | TWIST neighbor                                        | Twistnb  | 362728 | 1,19 | up   |
| 5735383 | 7301022 | 1624282 | tyrosyl-DNA phosphodiesterase 1                       | Tdp1     | 314380 | 1,04 | up   |
| 5751472 | 7301022 | 1624263 | tyrosyl-DNA phosphodiesterase 1                       | Tdp1     | 314380 | 1,81 | down |
| 5768149 | 7301022 | 1624261 | tyrosyl-DNA phosphodiesterase 1                       | Tdp1     | 314380 | 1,15 | down |
| 5777915 | 7301022 | 1624270 | tyrosyl-DNA phosphodiesterase 1                       | Tdp1     | 314380 | 1,00 | up   |
| 5790163 | 7301022 | 1624282 | tyrosyl-DNA phosphodiesterase 1                       | Tdp1     | 314380 | 1,01 | down |
| 5831510 | 7301022 | 1624267 | tyrosyl-DNA phosphodiesterase 1                       | Tdp1     | 314380 | 1,01 | up   |
| 5831519 | 7301022 | 1624269 | tyrosyl-DNA phosphodiesterase 1                       | Tdp1     | 314380 | 1,07 | up   |
| 5888835 | 7301022 | 1624266 | tyrosyl-DNA phosphodiesterase 1                       | Tdp1     | 314380 | 1,02 | up   |
| 5945594 | 7301022 | 1624256 | tyrosyl-DNA phosphodiesterase 1                       | Tdp1     | 314380 | 1,02 | up   |
| 6078221 | 7301022 | 1624266 | tyrosyl-DNA phosphodiesterase 1                       | Tdp1     | 314380 | 2,02 | down |
| 6139629 | 7301022 | 1624272 | tyrosyl-DNA phosphodiesterase 1                       | Tdp1     | 314380 | 1,52 | up   |
| 6153663 | 7301022 | 1624256 | tyrosyl-DNA phosphodiesterase 1                       | Tdp1     | 314380 | 1,26 | up   |
| 6181376 | 7301022 | 1624258 | tyrosyl-DNA phosphodiesterase 1                       | Tdp1     | 314380 | 1,75 | up   |
| 6192045 | 7301022 | 1624268 | tyrosyl-DNA phosphodiesterase 1                       | Tdp1     | 314380 | 1,27 | down |
| 6305193 | 7301022 | 1624280 | tyrosyl-DNA phosphodiesterase 1                       | Tdp1     | 314380 | 1,42 | up   |

|         |         |         |                                                 |       |        |      |      |
|---------|---------|---------|-------------------------------------------------|-------|--------|------|------|
| 6420821 | 7301022 | 1624282 | tyrosyl-DNA phosphodiesterase I                 | Tdp1  | 314380 | 1,21 | up   |
| 6435220 | 7301022 | 1624264 | tyrosyl-DNA phosphodiesterase I                 | Tdp1  | 314380 | 1,17 | down |
| 6442446 | 7301022 | 1624274 | tyrosyl-DNA phosphodiesterase I                 | Tdp1  | 314380 | 1,33 | up   |
| 6520595 | 7301022 | 1624259 | tyrosyl-DNA phosphodiesterase I                 | Tdp1  | 314380 | 1,66 | up   |
| 5643541 | 7340494 | 1721234 | ubiquinol-cytochrome c reductase core protein I | Uqcr1 | 301011 | 1,23 | up   |
| 5690202 | 7340494 | 1721243 | ubiquinol-cytochrome c reductase core protein I | Uqcr1 | 301011 | 1,31 | up   |
| 5822546 | 7340494 | 1721240 | ubiquinol-cytochrome c reductase core protein I | Uqcr1 | 301011 | 1,24 | up   |
| 5886882 | 7340494 | 1721231 | ubiquinol-cytochrome c reductase core protein I | Uqcr1 | 301011 | 1,02 | up   |
| 5958590 | 7340494 | 1721236 | ubiquinol-cytochrome c reductase core protein I | Uqcr1 | 301011 | 1,02 | up   |
| 5966266 | 7340494 | 1721243 | ubiquinol-cytochrome c reductase core protein I | Uqcr1 | 301011 | 1,37 | down |
| 5999280 | 7340494 | 1721237 | ubiquinol-cytochrome c reductase core protein I | Uqcr1 | 301011 | 1,20 | down |
| 6098596 | 7340494 | 1721232 | ubiquinol-cytochrome c reductase core protein I | Uqcr1 | 301011 | 1,12 | down |
| 6220695 | 7340494 | 1721243 | ubiquinol-cytochrome c reductase core protein I | Uqcr1 | 301011 | 2,05 | down |
| 6292816 | 7340494 | 1721242 | ubiquinol-cytochrome c reductase core protein I | Uqcr1 | 301011 | 1,42 | up   |
| 6300080 | 7340494 | 1721235 | ubiquinol-cytochrome c reductase core protein I | Uqcr1 | 301011 | 1,17 | up   |
| 6404122 | 7340494 | 1721241 | ubiquinol-cytochrome c reductase core protein I | Uqcr1 | 301011 | 1,07 | up   |
| 6636067 | 7340494 | 1721238 | ubiquinol-cytochrome c reductase core protein I | Uqcr1 | 301011 | 1,26 | up   |
| 6650473 | 7340494 | 1721239 | ubiquinol-cytochrome c reductase core protein I | Uqcr1 | 301011 | 1,15 | up   |
| 6737229 | 7340494 | 1721233 | ubiquinol-cytochrome c reductase core protein I | Uqcr1 | 301011 | 1,03 | up   |
| 5627264 | 7277505 | 1566515 | ubiquitin specific peptidase 1                  | Usp1  | 313387 | 1,02 | up   |
| 5655488 | 7277505 | 1566516 | ubiquitin specific peptidase 1                  | Usp1  | 313387 | 1,08 | up   |
| 5697808 | 7277505 | 1566520 | ubiquitin specific peptidase 1                  | Usp1  | 313387 | 2,40 | down |
| 5702041 | 7277505 | 1566521 | ubiquitin specific peptidase 1                  | Usp1  | 313387 | 1,07 | up   |
| 5716905 | 7277505 | 1566513 | ubiquitin specific peptidase 1                  | Usp1  | 313387 | 1,22 | up   |
| 5762858 | 7277505 | 1566514 | ubiquitin specific peptidase 1                  | Usp1  | 313387 | 1,47 | up   |
| 6127580 | 7277505 | 1566518 | ubiquitin specific peptidase 1                  | Usp1  | 313387 | 1,19 | down |
| 6184794 | 7277505 | 1566522 | ubiquitin specific peptidase 1                  | Usp1  | 313387 | 1,03 | up   |
| 6289488 | 7277505 | 1566516 | ubiquitin specific peptidase 1                  | Usp1  | 313387 | 1,10 | down |
| 6394131 | 7277505 | 1566517 | ubiquitin specific peptidase 1                  | Usp1  | 313387 | 1,04 | down |
| 6439576 | 7277505 | 1566515 | ubiquitin specific peptidase 1                  | Usp1  | 313387 | 1,03 | down |
| 6500060 | 7277505 | 1566519 | ubiquitin specific peptidase 1                  | Usp1  | 313387 | 1,05 | down |
| 5694944 | 7086044 | 1092928 | ubiquitin specific peptidase 25                 | Usp25 | 304150 | 1,45 | up   |
| 5701893 | 7086044 | 1092909 | ubiquitin specific peptidase 25                 | Usp25 | 304150 | 1,52 | down |
| 5720205 | 7086044 | 1092925 | ubiquitin specific peptidase 25                 | Usp25 | 304150 | 1,64 | down |
| 5730935 | 7086044 | 1092947 | ubiquitin specific peptidase 25                 | Usp25 | 304150 | 1,44 | up   |
| 5733128 | 7086044 | 1092943 | ubiquitin specific peptidase 25                 | Usp25 | 304150 | 1,10 | down |
| 5737319 | 7086044 | 1092949 | ubiquitin specific peptidase 25                 | Usp25 | 304150 | 1,09 | down |
| 5833989 | 7086044 | 1092929 | ubiquitin specific peptidase 25                 | Usp25 | 304150 | 1,04 | up   |
| 5866959 | 7086044 | 1092948 | ubiquitin specific peptidase 25                 | Usp25 | 304150 | 1,14 | up   |
| 5878857 | 7086044 | 1092918 | ubiquitin specific peptidase 25                 | Usp25 | 304150 | 1,05 | up   |
| 5890075 | 7086044 | 1092930 | ubiquitin specific peptidase 25                 | Usp25 | 304150 | 1,44 | down |
| 5963834 | 7086044 | 1092917 | ubiquitin specific peptidase 25                 | Usp25 | 304150 | 1,91 | up   |
| 6035362 | 7086044 | 1092921 | ubiquitin specific peptidase 25                 | Usp25 | 304150 | 1,28 | up   |
| 6064182 | 7086044 | 1092934 | ubiquitin specific peptidase 25                 | Usp25 | 304150 | 1,10 | up   |
| 6099736 | 7086044 | 1092922 | ubiquitin specific peptidase 25                 | Usp25 | 304150 | 1,01 | up   |
| 6122600 | 7086044 | 1092914 | ubiquitin specific peptidase 25                 | Usp25 | 304150 | 1,05 | up   |
| 6130909 | 7086044 | 1092933 | ubiquitin specific peptidase 25                 | Usp25 | 304150 | 1,84 | up   |
| 6278970 | 7086044 | 1092928 | ubiquitin specific peptidase 25                 | Usp25 | 304150 | 1,53 | down |
| 6314125 | 7086044 | 1092936 | ubiquitin specific peptidase 25                 | Usp25 | 304150 | 1,19 | down |
| 6347585 | 7086044 | 1092932 | ubiquitin specific peptidase 25                 | Usp25 | 304150 | 1,33 | up   |
| 6400264 | 7086044 | 1092931 | ubiquitin specific peptidase 25                 | Usp25 | 304150 | 1,05 | down |
| 6412257 | 7086044 | 1092915 | ubiquitin specific peptidase 25                 | Usp25 | 304150 | 1,51 | down |
| 6414547 | 7086044 | 1092942 | ubiquitin specific peptidase 25                 | Usp25 | 304150 | 1,05 | down |
| 6497954 | 7086044 | 1092944 | ubiquitin specific peptidase 25                 | Usp25 | 304150 | 1,26 | down |
| 6509990 | 7086044 | 1092935 | ubiquitin specific peptidase 25                 | Usp25 | 304150 | 1,40 | up   |
| 6558953 | 7086044 | 1092920 | ubiquitin specific peptidase 25                 | Usp25 | 304150 | 1,13 | down |

|         |         |         |                                 |       |        |      |      |
|---------|---------|---------|---------------------------------|-------|--------|------|------|
| 6583374 | 7086044 | 1092931 | ubiquitin specific peptidase 25 | Usp25 | 304150 | 1,43 | up   |
| 6724324 | 7086044 | 1092949 | ubiquitin specific peptidase 25 | Usp25 | 304150 | 1,34 | down |
| 6730551 | 7086044 | 1092950 | ubiquitin specific peptidase 25 | Usp25 | 304150 | 1,04 | down |
| 5621535 | 7265989 | 1537085 | ubiquitin specific peptidase 39 | Usp39 | 297336 | 1,20 | down |
| 5675532 | 7265989 | 1537092 | ubiquitin specific peptidase 39 | Usp39 | 297336 | 1,04 | down |
| 5833659 | 7265989 | 1537087 | ubiquitin specific peptidase 39 | Usp39 | 297336 | 1,02 | up   |
| 5951467 | 7265989 | 1537097 | ubiquitin specific peptidase 39 | Usp39 | 297336 | 1,02 | down |
| 5978993 | 7265989 | 1537086 | ubiquitin specific peptidase 39 | Usp39 | 297336 | 1,35 | down |
| 5987995 | 7265989 | 1537099 | ubiquitin specific peptidase 39 | Usp39 | 297336 | 1,52 | up   |
| 6096221 | 7265989 | 1537098 | ubiquitin specific peptidase 39 | Usp39 | 297336 | 1,46 | up   |
| 6129258 | 7265989 | 1537094 | ubiquitin specific peptidase 39 | Usp39 | 297336 | 1,13 | up   |
| 6172748 | 7265989 | 1537088 | ubiquitin specific peptidase 39 | Usp39 | 297336 | 1,17 | up   |
| 6297856 | 7265989 | 1537098 | ubiquitin specific peptidase 39 | Usp39 | 297336 | 1,07 | up   |
| 6310290 | 7265989 | 1537093 | ubiquitin specific peptidase 39 | Usp39 | 297336 | 1,15 | up   |
| 6380796 | 7265989 | 1537095 | ubiquitin specific peptidase 39 | Usp39 | 297336 | 1,04 | down |
| 6394767 | 7265989 | 1537084 | ubiquitin specific peptidase 39 | Usp39 | 297336 | 1,35 | down |
| 6419371 | 7265989 | 1537085 | ubiquitin specific peptidase 39 | Usp39 | 297336 | 1,43 | down |
| 6437217 | 7265989 | 1537089 | ubiquitin specific peptidase 39 | Usp39 | 297336 | 1,32 | up   |
| 6484744 | 7265989 | 1537102 | ubiquitin specific peptidase 39 | Usp39 | 297336 | 1,26 | down |
| 6671630 | 7265989 | 1537090 | ubiquitin specific peptidase 39 | Usp39 | 297336 | 1,50 | up   |
| 6697704 | 7265989 | 1537096 | ubiquitin specific peptidase 39 | Usp39 | 297336 | 1,25 | up   |
| 5632334 | 7364995 | 1781301 | ubiquitin specific peptidase 40 | Usp40 | 316599 | 1,00 | up   |
| 5644357 | 7364995 | 1781317 | ubiquitin specific peptidase 40 | Usp40 | 316599 | 1,36 | up   |
| 5651719 | 7364995 | 1781319 | ubiquitin specific peptidase 40 | Usp40 | 316599 | 1,15 | down |
| 5683550 | 7364995 | 1781318 | ubiquitin specific peptidase 40 | Usp40 | 316599 | 1,90 | up   |
| 5714396 | 7364995 | 1781331 | ubiquitin specific peptidase 40 | Usp40 | 316599 | 1,07 | up   |
| 5727348 | 7364995 | 1781306 | ubiquitin specific peptidase 40 | Usp40 | 316599 | 1,25 | down |
| 5754929 | 7364995 | 1781327 | ubiquitin specific peptidase 40 | Usp40 | 316599 | 1,03 | down |
| 5779334 | 7364995 | 1781330 | ubiquitin specific peptidase 40 | Usp40 | 316599 | 1,02 | down |
| 5787603 | 7364995 | 1781321 | ubiquitin specific peptidase 40 | Usp40 | 316599 | 1,56 | down |
| 5790562 | 7364995 | 1781321 | ubiquitin specific peptidase 40 | Usp40 | 316599 | 1,03 | down |
| 5848299 | 7364995 | 1781311 | ubiquitin specific peptidase 40 | Usp40 | 316599 | 1,67 | down |
| 5853135 | 7364995 | 1781295 | ubiquitin specific peptidase 40 | Usp40 | 316599 | 1,50 | down |
| 5882796 | 7364995 | 1781326 | ubiquitin specific peptidase 40 | Usp40 | 316599 | 1,02 | down |
| 5903393 | 7364995 | 1781313 | ubiquitin specific peptidase 40 | Usp40 | 316599 | 1,26 | down |
| 5947793 | 7364995 | 1781337 | ubiquitin specific peptidase 40 | Usp40 | 316599 | 1,03 | down |
| 5952222 | 7364995 | 1781319 | ubiquitin specific peptidase 40 | Usp40 | 316599 | 1,17 | up   |
| 5965256 | 7364995 | 1781295 | ubiquitin specific peptidase 40 | Usp40 | 316599 | 1,63 | down |
| 5992075 | 7364995 | 1781336 | ubiquitin specific peptidase 40 | Usp40 | 316599 | 1,27 | up   |
| 5997618 | 7364995 | 1781315 | ubiquitin specific peptidase 40 | Usp40 | 316599 | 1,05 | down |
| 6038439 | 7364995 | 1781304 | ubiquitin specific peptidase 40 | Usp40 | 316599 | 1,13 | down |
| 6058245 | 7364995 | 1781302 | ubiquitin specific peptidase 40 | Usp40 | 316599 | 1,01 | up   |
| 6065133 | 7364995 | 1781310 | ubiquitin specific peptidase 40 | Usp40 | 316599 | 1,34 | down |
| 6066656 | 7364995 | 1781321 | ubiquitin specific peptidase 40 | Usp40 | 316599 | 1,01 | down |
| 6134425 | 7364995 | 1781299 | ubiquitin specific peptidase 40 | Usp40 | 316599 | 1,21 | up   |
| 6157821 | 7364995 | 1781309 | ubiquitin specific peptidase 40 | Usp40 | 316599 | 1,19 | down |
| 6170668 | 7364995 | 1781337 | ubiquitin specific peptidase 40 | Usp40 | 316599 | 1,09 | up   |
| 6201216 | 7364995 | 1781294 | ubiquitin specific peptidase 40 | Usp40 | 316599 | 1,00 | down |
| 6264832 | 7364995 | 1781307 | ubiquitin specific peptidase 40 | Usp40 | 316599 | 1,17 | down |
| 6270134 | 7364995 | 1781322 | ubiquitin specific peptidase 40 | Usp40 | 316599 | 1,13 | up   |
| 6289681 | 7364995 | 1781334 | ubiquitin specific peptidase 40 | Usp40 | 316599 | 1,05 | down |
| 6302174 | 7364995 | 1781310 | ubiquitin specific peptidase 40 | Usp40 | 316599 | 1,14 | up   |
| 6357441 | 7364995 | 1781305 | ubiquitin specific peptidase 40 | Usp40 | 316599 | 1,08 | up   |
| 6398693 | 7364995 | 1781298 | ubiquitin specific peptidase 40 | Usp40 | 316599 | 1,03 | up   |
| 6460022 | 7364995 | 1781323 | ubiquitin specific peptidase 40 | Usp40 | 316599 | 1,39 | down |
| 6471556 | 7364995 | 1781312 | ubiquitin specific peptidase 40 | Usp40 | 316599 | 2,23 | down |

|         |         |         |                                 |       |        |      |      |
|---------|---------|---------|---------------------------------|-------|--------|------|------|
| 6488838 | 7364995 | 1781294 | ubiquitin specific peptidase 40 | Usp40 | 316599 | 1,04 | up   |
| 6501657 | 7364995 | 1781295 | ubiquitin specific peptidase 40 | Usp40 | 316599 | 1,28 | down |
| 6545888 | 7364995 | 1781321 | ubiquitin specific peptidase 40 | Usp40 | 316599 | 1,04 | up   |
| 6578777 | 7364995 | 1781308 | ubiquitin specific peptidase 40 | Usp40 | 316599 | 1,04 | down |
| 6592352 | 7364995 | 1781320 | ubiquitin specific peptidase 40 | Usp40 | 316599 | 1,02 | up   |
| 6599819 | 7364995 | 1781297 | ubiquitin specific peptidase 40 | Usp40 | 316599 | 1,01 | up   |
| 6639931 | 7364995 | 1781325 | ubiquitin specific peptidase 40 | Usp40 | 316599 | 1,10 | up   |
| 6663523 | 7364995 | 1781295 | ubiquitin specific peptidase 40 | Usp40 | 316599 | 1,20 | down |
| 6676582 | 7364995 | 1781304 | ubiquitin specific peptidase 40 | Usp40 | 316599 | 1,01 | up   |
| 5641526 | 7273223 | 1555900 | ubiquitin specific peptidase 45 | Usp45 | 313098 | 1,04 | down |
| 5711374 | 7273223 | 1555902 | ubiquitin specific peptidase 45 | Usp45 | 313098 | 1,35 | down |
| 5716761 | 7273223 | 1555888 | ubiquitin specific peptidase 45 | Usp45 | 313098 | 1,04 | down |
| 5756072 | 7273223 | 1555898 | ubiquitin specific peptidase 45 | Usp45 | 313098 | 1,09 | up   |
| 5771833 | 7273223 | 1555878 | ubiquitin specific peptidase 45 | Usp45 | 313098 | 1,02 | up   |
| 5896528 | 7273223 | 1555893 | ubiquitin specific peptidase 45 | Usp45 | 313098 | 1,03 | up   |
| 5948319 | 7273223 | 1555874 | ubiquitin specific peptidase 45 | Usp45 | 313098 | 1,05 | up   |
| 5978753 | 7273223 | 1555885 | ubiquitin specific peptidase 45 | Usp45 | 313098 | 1,68 | down |
| 6009355 | 7273223 | 1555883 | ubiquitin specific peptidase 45 | Usp45 | 313098 | 1,07 | down |
| 6119051 | 7273223 | 1555882 | ubiquitin specific peptidase 45 | Usp45 | 313098 | 1,27 | up   |
| 6165975 | 7273223 | 1555881 | ubiquitin specific peptidase 45 | Usp45 | 313098 | 1,36 | up   |
| 6204225 | 7273223 | 1555883 | ubiquitin specific peptidase 45 | Usp45 | 313098 | 1,17 | up   |
| 6240434 | 7273223 | 1555875 | ubiquitin specific peptidase 45 | Usp45 | 313098 | 1,13 | up   |
| 6412327 | 7273223 | 1555897 | ubiquitin specific peptidase 45 | Usp45 | 313098 | 1,09 | up   |
| 6415963 | 7273223 | 1555875 | ubiquitin specific peptidase 45 | Usp45 | 313098 | 1,05 | up   |
| 6455477 | 7273223 | 1555893 | ubiquitin specific peptidase 45 | Usp45 | 313098 | 1,67 | up   |
| 6460720 | 7273223 | 1555899 | ubiquitin specific peptidase 45 | Usp45 | 313098 | 1,11 | down |
| 6559570 | 7273223 | 1555872 | ubiquitin specific peptidase 45 | Usp45 | 313098 | 1,14 | up   |
| 6661143 | 7273223 | 1555877 | ubiquitin specific peptidase 45 | Usp45 | 313098 | 1,30 | up   |
| 6687337 | 7273223 | 1555890 | ubiquitin specific peptidase 45 | Usp45 | 313098 | 1,51 | up   |
| 6705265 | 7273223 | 1555891 | ubiquitin specific peptidase 45 | Usp45 | 313098 | 1,15 | down |
| 6708217 | 7273223 | 1555887 | ubiquitin specific peptidase 45 | Usp45 | 313098 | 2,03 | down |
| 5681115 | 7213679 | 1407132 | ubiquitin specific peptidase 53 | Usp53 | 295425 | 1,01 | up   |
| 5735765 | 7213679 | 1407129 | ubiquitin specific peptidase 53 | Usp53 | 295425 | 1,20 | up   |
| 5741568 | 7213679 | 1407141 | ubiquitin specific peptidase 53 | Usp53 | 295425 | 1,06 | up   |
| 5742161 | 7213679 | 1407144 | ubiquitin specific peptidase 53 | Usp53 | 295425 | 1,09 | up   |
| 5802318 | 7213679 | 1407139 | ubiquitin specific peptidase 53 | Usp53 | 295425 | 1,76 | down |
| 5894135 | 7213679 | 1407129 | ubiquitin specific peptidase 53 | Usp53 | 295425 | 1,28 | down |
| 5985024 | 7213679 | 1407148 | ubiquitin specific peptidase 53 | Usp53 | 295425 | 1,21 | up   |
| 6010708 | 7213679 | 1407136 | ubiquitin specific peptidase 53 | Usp53 | 295425 | 1,03 | down |
| 6044502 | 7213679 | 1407151 | ubiquitin specific peptidase 53 | Usp53 | 295425 | 1,11 | up   |
| 6050244 | 7213679 | 1407145 | ubiquitin specific peptidase 53 | Usp53 | 295425 | 1,22 | up   |
| 6126776 | 7213679 | 1407151 | ubiquitin specific peptidase 53 | Usp53 | 295425 | 1,35 | down |
| 6131435 | 7213679 | 1407138 | ubiquitin specific peptidase 53 | Usp53 | 295425 | 1,41 | up   |
| 6188422 | 7213679 | 1407128 | ubiquitin specific peptidase 53 | Usp53 | 295425 | 1,71 | down |
| 6261895 | 7213679 | 1407137 | ubiquitin specific peptidase 53 | Usp53 | 295425 | 1,62 | down |
| 6366185 | 7213679 | 1407140 | ubiquitin specific peptidase 53 | Usp53 | 295425 | 1,03 | down |
| 6474372 | 7213679 | 1407128 | ubiquitin specific peptidase 53 | Usp53 | 295425 | 1,53 | down |
| 6528907 | 7213679 | 1407128 | ubiquitin specific peptidase 53 | Usp53 | 295425 | 1,00 | up   |
| 6603245 | 7213679 | 1407139 | ubiquitin specific peptidase 53 | Usp53 | 295425 | 1,53 | down |
| 6612109 | 7213679 | 1407147 | ubiquitin specific peptidase 53 | Usp53 | 295425 | 1,08 | up   |
| 6671427 | 7213679 | 1407146 | ubiquitin specific peptidase 53 | Usp53 | 295425 | 1,49 | up   |
| 6711851 | 7213679 | 1407142 | ubiquitin specific peptidase 53 | Usp53 | 295425 | 1,36 | up   |
| 5667905 | 7129848 | 1200862 | ubiquitin specific peptidase 54 | Usp54 | 408223 | 2,23 | up   |
| 5788121 | 7129848 | 1200866 | ubiquitin specific peptidase 54 | Usp54 | 408223 | 1,32 | up   |
| 5826385 | 7129848 | 1200865 | ubiquitin specific peptidase 54 | Usp54 | 408223 | 1,04 | down |
| 5839043 | 7129848 | 1200864 | ubiquitin specific peptidase 54 | Usp54 | 408223 | 1,52 | up   |

|         |         |         |                                                                |       |        |      |      |
|---------|---------|---------|----------------------------------------------------------------|-------|--------|------|------|
| 5850521 | 7129848 | 1200868 | ubiquitin specific peptidase 54                                | Usp54 | 408223 | 1,14 | up   |
| 6053502 | 7129848 | 1200870 | ubiquitin specific peptidase 54                                | Usp54 | 408223 | 1,15 | down |
| 6159786 | 7129848 | 1200869 | ubiquitin specific peptidase 54                                | Usp54 | 408223 | 1,08 | down |
| 6517475 | 7129848 | 1200867 | ubiquitin specific peptidase 54                                | Usp54 | 408223 | 1,69 | down |
| 6667283 | 7129848 | 1200863 | ubiquitin specific peptidase 54                                | Usp54 | 408223 | 1,08 | up   |
| 5666162 | 7099973 | 1127535 | ubiquitin specific peptidase like 1                            | Usp11 | 288447 | 1,14 | up   |
| 5677400 | 7099973 | 1127538 | ubiquitin specific peptidase like 1                            | Usp11 | 288447 | 1,38 | down |
| 5805323 | 7099973 | 1127534 | ubiquitin specific peptidase like 1                            | Usp11 | 288447 | 1,33 | down |
| 5826192 | 7099973 | 1127536 | ubiquitin specific peptidase like 1                            | Usp11 | 288447 | 1,41 | up   |
| 5904084 | 7099973 | 1127543 | ubiquitin specific peptidase like 1                            | Usp11 | 288447 | 2,22 | up   |
| 6012274 | 7099973 | 1127535 | ubiquitin specific peptidase like 1                            | Usp11 | 288447 | 1,37 | down |
| 6020137 | 7099973 | 1127541 | ubiquitin specific peptidase like 1                            | Usp11 | 288447 | 1,16 | up   |
| 6293075 | 7099973 | 1127542 | ubiquitin specific peptidase like 1                            | Usp11 | 288447 | 1,82 | down |
| 6383661 | 7099973 | 1127539 | ubiquitin specific peptidase like 1                            | Usp11 | 288447 | 1,29 | down |
| 6502364 | 7099973 | 1127535 | ubiquitin specific peptidase like 1                            | Usp11 | 288447 | 1,14 | down |
| 6502857 | 7099973 | 1127537 | ubiquitin specific peptidase like 1                            | Usp11 | 288447 | 1,22 | up   |
| 6575869 | 7099973 | 1127540 | ubiquitin specific peptidase like 1                            | Usp11 | 288447 | 1,25 | up   |
| 6642904 | 7099973 | 1127540 | ubiquitin specific peptidase like 1                            | Usp11 | 288447 | 1,05 | up   |
| 5623864 | 7192914 | 1357813 | ubiquitin specific protease 13 (isopeptidase T-3)              | Usp13 | 310306 | 1,35 | down |
| 5647643 | 7192914 | 1357815 | ubiquitin specific protease 13 (isopeptidase T-3)              | Usp13 | 310306 | 1,21 | down |
| 5654490 | 7192914 | 1357809 | ubiquitin specific protease 13 (isopeptidase T-3)              | Usp13 | 310306 | 1,17 | down |
| 5664548 | 7192914 | 1357794 | ubiquitin specific protease 13 (isopeptidase T-3)              | Usp13 | 310306 | 1,12 | down |
| 5669121 | 7192914 | 1357826 | ubiquitin specific protease 13 (isopeptidase T-3)              | Usp13 | 310306 | 1,23 | up   |
| 5705411 | 7192914 | 1357823 | ubiquitin specific protease 13 (isopeptidase T-3)              | Usp13 | 310306 | 1,22 | up   |
| 5706881 | 7192914 | 1357806 | ubiquitin specific protease 13 (isopeptidase T-3)              | Usp13 | 310306 | 1,04 | up   |
| 5812484 | 7192914 | 1357802 | ubiquitin specific protease 13 (isopeptidase T-3)              | Usp13 | 310306 | 1,20 | up   |
| 5827503 | 7192914 | 1357829 | ubiquitin specific protease 13 (isopeptidase T-3)              | Usp13 | 310306 | 1,08 | down |
| 5838796 | 7192914 | 1357801 | ubiquitin specific protease 13 (isopeptidase T-3)              | Usp13 | 310306 | 1,38 | down |
| 5902906 | 7192914 | 1357793 | ubiquitin specific protease 13 (isopeptidase T-3)              | Usp13 | 310306 | 1,06 | down |
| 5976487 | 7192914 | 1357830 | ubiquitin specific protease 13 (isopeptidase T-3)              | Usp13 | 310306 | 1,08 | down |
| 5981054 | 7192914 | 1357810 | ubiquitin specific protease 13 (isopeptidase T-3)              | Usp13 | 310306 | 1,01 | up   |
| 5982819 | 7192914 | 1357785 | ubiquitin specific protease 13 (isopeptidase T-3)              | Usp13 | 310306 | 1,48 | down |
| 6001306 | 7192914 | 1357786 | ubiquitin specific protease 13 (isopeptidase T-3)              | Usp13 | 310306 | 1,19 | up   |
| 6042968 | 7192914 | 1357797 | ubiquitin specific protease 13 (isopeptidase T-3)              | Usp13 | 310306 | 1,28 | down |
| 6144521 | 7192914 | 1357829 | ubiquitin specific protease 13 (isopeptidase T-3)              | Usp13 | 310306 | 1,14 | up   |
| 6162617 | 7192914 | 1357820 | ubiquitin specific protease 13 (isopeptidase T-3)              | Usp13 | 310306 | 1,06 | up   |
| 6181700 | 7192914 | 1357828 | ubiquitin specific protease 13 (isopeptidase T-3)              | Usp13 | 310306 | 1,31 | up   |
| 6205407 | 7192914 | 1357821 | ubiquitin specific protease 13 (isopeptidase T-3)              | Usp13 | 310306 | 1,10 | down |
| 6320957 | 7192914 | 1357824 | ubiquitin specific protease 13 (isopeptidase T-3)              | Usp13 | 310306 | 1,02 | down |
| 6368787 | 7192914 | 1357809 | ubiquitin specific protease 13 (isopeptidase T-3)              | Usp13 | 310306 | 1,06 | down |
| 6596992 | 7192914 | 1357829 | ubiquitin specific protease 13 (isopeptidase T-3)              | Usp13 | 310306 | 1,43 | up   |
| 6626115 | 7192914 | 1357827 | ubiquitin specific protease 13 (isopeptidase T-3)              | Usp13 | 310306 | 1,07 | up   |
| 6652288 | 7192914 | 1357811 | ubiquitin specific protease 13 (isopeptidase T-3)              | Usp13 | 310306 | 1,12 | down |
| 6662234 | 7192914 | 1357814 | ubiquitin specific protease 13 (isopeptidase T-3)              | Usp13 | 310306 | 1,05 | down |
| 5835365 | 7378941 | 1818449 | ubiquitin-conjugating enzyme E2A, RAD6 homolog (S. cerevisiae) | Ube2a | 298317 | 1,06 | up   |
| 5886537 | 7378941 | 1818450 | ubiquitin-conjugating enzyme E2A, RAD6 homolog (S. cerevisiae) | Ube2a | 298317 | 1,06 | down |
| 6119878 | 7378941 | 1818451 | ubiquitin-conjugating enzyme E2A, RAD6 homolog (S. cerevisiae) | Ube2a | 298317 | 1,52 | down |
| 6133750 | 7378941 | 1818453 | ubiquitin-conjugating enzyme E2A, RAD6 homolog (S. cerevisiae) | Ube2a | 298317 | 2,97 | down |
| 6252549 | 7378941 | 1818454 | ubiquitin-conjugating enzyme E2A, RAD6 homolog (S. cerevisiae) | Ube2a | 298317 | 1,23 | up   |
| 6272102 | 7378941 | 1818448 | ubiquitin-conjugating enzyme E2A, RAD6 homolog (S. cerevisiae) | Ube2a | 298317 | 1,14 | down |
| 6366583 | 7378941 | 1818455 | ubiquitin-conjugating enzyme E2A, RAD6 homolog (S. cerevisiae) | Ube2a | 298317 | 1,12 | down |
| 6504877 | 7378941 | 1818452 | ubiquitin-conjugating enzyme E2A, RAD6 homolog (S. cerevisiae) | Ube2a | 298317 | 1,91 | up   |
| 5913641 | 7235323 | 1461555 | ubiquitin-conjugating enzyme E2C                               | Ube2c | 296368 | 2,26 | down |
| 5934090 | 7235323 | 1461551 | ubiquitin-conjugating enzyme E2C                               | Ube2c | 296368 | 1,03 | up   |
| 6047393 | 7235323 | 1461552 | ubiquitin-conjugating enzyme E2C                               | Ube2c | 296368 | 1,03 | up   |
| 6092259 | 7235323 | 1461551 | ubiquitin-conjugating enzyme E2C                               | Ube2c | 296368 | 1,69 | up   |

|         |         |         |                                             |         |        |      |      |
|---------|---------|---------|---------------------------------------------|---------|--------|------|------|
| 6095663 | 7235323 | 1461553 | ubiquitin-conjugating enzyme E2C            | Ube2c   | 296368 | 1,12 | down |
| 6440845 | 7235323 | 1461556 | ubiquitin-conjugating enzyme E2C            | Ube2c   | 296368 | 1,26 | up   |
| 5678623 | 7340304 | 1720856 | ubiquitin-like modifier activating enzyme 7 | Uba7    | 301000 | 1,03 | up   |
| 5685950 | 7340304 | 1720859 | ubiquitin-like modifier activating enzyme 7 | Uba7    | 301000 | 1,01 | up   |
| 5718772 | 7340304 | 1720858 | ubiquitin-like modifier activating enzyme 7 | Uba7    | 301000 | 1,08 | up   |
| 5741493 | 7340304 | 1720851 | ubiquitin-like modifier activating enzyme 7 | Uba7    | 301000 | 3,13 | up   |
| 5762888 | 7340304 | 1720844 | ubiquitin-like modifier activating enzyme 7 | Uba7    | 301000 | 3,83 | up   |
| 5764792 | 7340304 | 1720840 | ubiquitin-like modifier activating enzyme 7 | Uba7    | 301000 | 1,40 | down |
| 5771507 | 7340304 | 1720851 | ubiquitin-like modifier activating enzyme 7 | Uba7    | 301000 | 2,12 | up   |
| 5775485 | 7340304 | 1720853 | ubiquitin-like modifier activating enzyme 7 | Uba7    | 301000 | 1,75 | up   |
| 5797751 | 7340304 | 1720841 | ubiquitin-like modifier activating enzyme 7 | Uba7    | 301000 | 1,26 | up   |
| 5880274 | 7340304 | 1720840 | ubiquitin-like modifier activating enzyme 7 | Uba7    | 301000 | 1,43 | down |
| 6031571 | 7340304 | 1720849 | ubiquitin-like modifier activating enzyme 7 | Uba7    | 301000 | 1,11 | up   |
| 6092880 | 7340304 | 1720855 | ubiquitin-like modifier activating enzyme 7 | Uba7    | 301000 | 1,29 | up   |
| 6093628 | 7340304 | 1720857 | ubiquitin-like modifier activating enzyme 7 | Uba7    | 301000 | 1,66 | down |
| 6177392 | 7340304 | 1720853 | ubiquitin-like modifier activating enzyme 7 | Uba7    | 301000 | 1,08 | up   |
| 6321353 | 7340304 | 1720843 | ubiquitin-like modifier activating enzyme 7 | Uba7    | 301000 | 3,27 | up   |
| 6361677 | 7340304 | 1720852 | ubiquitin-like modifier activating enzyme 7 | Uba7    | 301000 | 2,49 | up   |
| 6373978 | 7340304 | 1720841 | ubiquitin-like modifier activating enzyme 7 | Uba7    | 301000 | 1,70 | up   |
| 6449810 | 7340304 | 1720847 | ubiquitin-like modifier activating enzyme 7 | Uba7    | 301000 | 2,43 | up   |
| 6463325 | 7340304 | 1720840 | ubiquitin-like modifier activating enzyme 7 | Uba7    | 301000 | 1,25 | down |
| 6476537 | 7340304 | 1720845 | ubiquitin-like modifier activating enzyme 7 | Uba7    | 301000 | 2,48 | up   |
| 6490556 | 7340304 | 1720850 | ubiquitin-like modifier activating enzyme 7 | Uba7    | 301000 | 2,92 | up   |
| 6570080 | 7340304 | 1720851 | ubiquitin-like modifier activating enzyme 7 | Uba7    | 301000 | 1,85 | up   |
| 6587227 | 7340304 | 1720842 | ubiquitin-like modifier activating enzyme 7 | Uba7    | 301000 | 1,79 | up   |
| 6666535 | 7340304 | 1720848 | ubiquitin-like modifier activating enzyme 7 | Uba7    | 301000 | 2,73 | up   |
| 6722789 | 7340304 | 1720854 | ubiquitin-like modifier activating enzyme 7 | Uba7    | 301000 | 1,07 | up   |
| 5802178 | 7280362 | 1573676 | UBX domain protein 11                       | Ubxn11  | 192207 | 1,04 | down |
| 5947333 | 7280362 | 1573686 | UBX domain protein 11                       | Ubxn11  | 192207 | 1,12 | up   |
| 6040154 | 7280362 | 1573685 | UBX domain protein 11                       | Ubxn11  | 192207 | 1,28 | down |
| 6070207 | 7280362 | 1573681 | UBX domain protein 11                       | Ubxn11  | 192207 | 1,51 | down |
| 6140236 | 7280362 | 1573674 | UBX domain protein 11                       | Ubxn11  | 192207 | 1,06 | up   |
| 6148515 | 7280362 | 1573678 | UBX domain protein 11                       | Ubxn11  | 192207 | 1,06 | up   |
| 6168172 | 7280362 | 1573673 | UBX domain protein 11                       | Ubxn11  | 192207 | 2,04 | down |
| 6176502 | 7280362 | 1573680 | UBX domain protein 11                       | Ubxn11  | 192207 | 1,14 | up   |
| 6180098 | 7280362 | 1573682 | UBX domain protein 11                       | Ubxn11  | 192207 | 1,06 | down |
| 6197195 | 7280362 | 1573683 | UBX domain protein 11                       | Ubxn11  | 192207 | 1,06 | down |
| 6351259 | 7280362 | 1573672 | UBX domain protein 11                       | Ubxn11  | 192207 | 1,44 | up   |
| 6391116 | 7280362 | 1573677 | UBX domain protein 11                       | Ubxn11  | 192207 | 1,12 | up   |
| 6427706 | 7280362 | 1573679 | UBX domain protein 11                       | Ubxn11  | 192207 | 1,15 | up   |
| 6507524 | 7280362 | 1573675 | UBX domain protein 11                       | Ubxn11  | 192207 | 1,27 | up   |
| 6663742 | 7280362 | 1573684 | UBX domain protein 11                       | Ubxn11  | 192207 | 1,16 | down |
| 6725758 | 7280362 | 1573673 | UBX domain protein 11                       | Ubxn11  | 192207 | 1,12 | up   |
| 6726627 | 7280362 | 1573673 | UBX domain protein 11                       | Ubxn11  | 192207 | 1,29 | down |
| 5844587 | 7384904 | 1831596 | UCHL5 interacting protein                   | Uchl5ip | 293844 | 1,36 | down |
| 5948237 | 7384904 | 1831604 | UCHL5 interacting protein                   | Uchl5ip | 293844 | 1,01 | up   |
| 5955009 | 7384904 | 1831600 | UCHL5 interacting protein                   | Uchl5ip | 293844 | 1,02 | down |
| 6110791 | 7384904 | 1831605 | UCHL5 interacting protein                   | Uchl5ip | 293844 | 1,01 | up   |
| 6247412 | 7384904 | 1831606 | UCHL5 interacting protein                   | Uchl5ip | 293844 | 1,03 | down |
| 6263344 | 7384904 | 1831601 | UCHL5 interacting protein                   | Uchl5ip | 293844 | 1,03 | down |
| 6335668 | 7384904 | 1831600 | UCHL5 interacting protein                   | Uchl5ip | 293844 | 1,70 | down |
| 6340090 | 7384904 | 1831599 | UCHL5 interacting protein                   | Uchl5ip | 293844 | 1,36 | up   |
| 6362254 | 7384904 | 1831608 | UCHL5 interacting protein                   | Uchl5ip | 293844 | 1,21 | down |
| 6479313 | 7384904 | 1831597 | UCHL5 interacting protein                   | Uchl5ip | 293844 | 1,97 | down |
| 6521748 | 7384904 | 1831608 | UCHL5 interacting protein                   | Uchl5ip | 293844 | 1,37 | up   |
| 6522205 | 7384904 | 1831596 | UCHL5 interacting protein                   | Uchl5ip | 293844 | 1,02 | up   |

|         |         |         |                                                                   |         |        |      |      |
|---------|---------|---------|-------------------------------------------------------------------|---------|--------|------|------|
| 6608393 | 7384904 | 1831600 | UCHL5 interacting protein                                         | Uchl5ip | 293844 | 1,02 | down |
| 6638181 | 7384904 | 1831602 | UCHL5 interacting protein                                         | Uchl5ip | 293844 | 1,42 | up   |
| 6656600 | 7384904 | 1831599 | UCHL5 interacting protein                                         | Uchl5ip | 293844 | 1,12 | down |
| 5708951 | 7117388 | 1170605 | UDP glucuronosyltransferase 2 family, polypeptide B17             | Ugt2b17 | 286954 | 1,06 | up   |
| 5860699 | 7117388 | 1170609 | UDP glucuronosyltransferase 2 family, polypeptide B17             | Ugt2b17 | 286954 | 1,48 | down |
| 5900963 | 7117388 | 1170611 | UDP glucuronosyltransferase 2 family, polypeptide B17             | Ugt2b17 | 286954 | 1,02 | up   |
| 6002918 | 7117388 | 1170611 | UDP glucuronosyltransferase 2 family, polypeptide B17             | Ugt2b17 | 286954 | 1,00 | up   |
| 6061053 | 7117388 | 1170606 | UDP glucuronosyltransferase 2 family, polypeptide B17             | Ugt2b17 | 286954 | 1,15 | down |
| 6180975 | 7117388 | 1170608 | UDP glucuronosyltransferase 2 family, polypeptide B17             | Ugt2b17 | 286954 | 1,05 | up   |
| 6262322 | 7117388 | 1170605 | UDP glucuronosyltransferase 2 family, polypeptide B17             | Ugt2b17 | 286954 | 2,19 | up   |
| 6396948 | 7117388 | 1170610 | UDP glucuronosyltransferase 2 family, polypeptide B17             | Ugt2b17 | 286954 | 1,02 | down |
| 6681508 | 7117388 | 1170605 | UDP glucuronosyltransferase 2 family, polypeptide B17             | Ugt2b17 | 286954 | 1,07 | down |
| 6723308 | 7117388 | 1170610 | UDP glucuronosyltransferase 2 family, polypeptide B17             | Ugt2b17 | 286954 | 1,73 | up   |
| 6744216 | 7117388 | 1170607 | UDP glucuronosyltransferase 2 family, polypeptide B17             | Ugt2b17 | 286954 | 1,01 | up   |
| 5768759 | 7105894 | 1142035 | UDP-Gal:betaGlcNAc beta 1,3-galactosyltransferase, polypeptide 2  | B3galt2 | 686081 | 1,08 | up   |
| 5970748 | 7105894 | 1142033 | UDP-Gal:betaGlcNAc beta 1,3-galactosyltransferase, polypeptide 2  | B3galt2 | 686081 | 1,51 | down |
| 6091468 | 7105894 | 1142036 | UDP-Gal:betaGlcNAc beta 1,3-galactosyltransferase, polypeptide 2  | B3galt2 | 686081 | 2,03 | up   |
| 6169942 | 7105894 | 1142034 | UDP-Gal:betaGlcNAc beta 1,3-galactosyltransferase, polypeptide 2  | B3galt2 | 686081 | 1,08 | up   |
| 6308290 | 7105894 | 1142034 | UDP-Gal:betaGlcNAc beta 1,3-galactosyltransferase, polypeptide 2  | B3galt2 | 686081 | 1,13 | down |
| 5651374 | 7285239 | 1585485 | UDP-Gal:betaGlcNAc beta 1,4- galactosyltransferase, polypeptide 1 | B4galt1 | 24390  | 1,27 | up   |
| 5721847 | 7285239 | 1585487 | UDP-Gal:betaGlcNAc beta 1,4- galactosyltransferase, polypeptide 1 | B4galt1 | 24390  | 1,14 | up   |
| 5735907 | 7285239 | 1585483 | UDP-Gal:betaGlcNAc beta 1,4- galactosyltransferase, polypeptide 1 | B4galt1 | 24390  | 1,06 | down |
| 5745930 | 7285239 | 1585479 | UDP-Gal:betaGlcNAc beta 1,4- galactosyltransferase, polypeptide 1 | B4galt1 | 24390  | 1,31 | up   |
| 5765881 | 7285239 | 1585496 | UDP-Gal:betaGlcNAc beta 1,4- galactosyltransferase, polypeptide 1 | B4galt1 | 24390  | 1,07 | down |
| 5773265 | 7285239 | 1585496 | UDP-Gal:betaGlcNAc beta 1,4- galactosyltransferase, polypeptide 1 | B4galt1 | 24390  | 1,04 | down |
| 5948832 | 7285239 | 1585479 | UDP-Gal:betaGlcNAc beta 1,4- galactosyltransferase, polypeptide 1 | B4galt1 | 24390  | 1,68 | down |
| 6056699 | 7285239 | 1585479 | UDP-Gal:betaGlcNAc beta 1,4- galactosyltransferase, polypeptide 1 | B4galt1 | 24390  | 1,05 | down |
| 6070418 | 7285239 | 1585496 | UDP-Gal:betaGlcNAc beta 1,4- galactosyltransferase, polypeptide 1 | B4galt1 | 24390  | 1,34 | down |
| 6139872 | 7285239 | 1585496 | UDP-Gal:betaGlcNAc beta 1,4- galactosyltransferase, polypeptide 1 | B4galt1 | 24390  | 1,02 | up   |
| 6228494 | 7285239 | 1585496 | UDP-Gal:betaGlcNAc beta 1,4- galactosyltransferase, polypeptide 1 | B4galt1 | 24390  | 1,15 | down |
| 6293463 | 7285239 | 1585481 | UDP-Gal:betaGlcNAc beta 1,4- galactosyltransferase, polypeptide 1 | B4galt1 | 24390  | 1,02 | down |
| 6390971 | 7285239 | 1585479 | UDP-Gal:betaGlcNAc beta 1,4- galactosyltransferase, polypeptide 1 | B4galt1 | 24390  | 2,49 | up   |
| 6563495 | 7285239 | 1585485 | UDP-Gal:betaGlcNAc beta 1,4- galactosyltransferase, polypeptide 1 | B4galt1 | 24390  | 1,27 | down |
| 6573681 | 7285239 | 1585495 | UDP-Gal:betaGlcNAc beta 1,4- galactosyltransferase, polypeptide 1 | B4galt1 | 24390  | 1,14 | up   |
| 5667435 | 7093534 | 1111530 | UDP-Gal:betaGlcNAc beta 1,4-galactosyltransferase, polypeptide 4  | B4galt4 | 303923 | 1,29 | down |
| 5690741 | 7093534 | 1111531 | UDP-Gal:betaGlcNAc beta 1,4-galactosyltransferase, polypeptide 4  | B4galt4 | 303923 | 1,52 | down |
| 5711879 | 7093534 | 1111535 | UDP-Gal:betaGlcNAc beta 1,4-galactosyltransferase, polypeptide 4  | B4galt4 | 303923 | 2,08 | down |
| 5813529 | 7093534 | 1111533 | UDP-Gal:betaGlcNAc beta 1,4-galactosyltransferase, polypeptide 4  | B4galt4 | 303923 | 1,03 | up   |
| 5962928 | 7093534 | 1111535 | UDP-Gal:betaGlcNAc beta 1,4-galactosyltransferase, polypeptide 4  | B4galt4 | 303923 | 1,31 | up   |
| 6284565 | 7093534 | 1111529 | UDP-Gal:betaGlcNAc beta 1,4-galactosyltransferase, polypeptide 4  | B4galt4 | 303923 | 1,19 | up   |
| 6370452 | 7093534 | 1111535 | UDP-Gal:betaGlcNAc beta 1,4-galactosyltransferase, polypeptide 4  | B4galt4 | 303923 | 1,33 | up   |
| 6437924 | 7093534 | 1111532 | UDP-Gal:betaGlcNAc beta 1,4-galactosyltransferase, polypeptide 4  | B4galt4 | 303923 | 1,14 | up   |
| 6538820 | 7093534 | 1111536 | UDP-Gal:betaGlcNAc beta 1,4-galactosyltransferase, polypeptide 4  | B4galt4 | 303923 | 1,10 | up   |
| 6547566 | 7093534 | 1111529 | UDP-Gal:betaGlcNAc beta 1,4-galactosyltransferase, polypeptide 4  | B4galt4 | 303923 | 1,07 | down |
| 6686702 | 7093534 | 1111534 | UDP-Gal:betaGlcNAc beta 1,4-galactosyltransferase, polypeptide 4  | B4galt4 | 303923 | 1,10 | down |
| 5677972 | 7370484 | 1797162 | UDP-glucuronate decarboxylase 1                                   | Uxs1    | 246232 | 1,04 | down |
| 5718376 | 7370484 | 1797164 | UDP-glucuronate decarboxylase 1                                   | Uxs1    | 246232 | 1,03 | up   |
| 5932143 | 7370484 | 1797170 | UDP-glucuronate decarboxylase 1                                   | Uxs1    | 246232 | 1,04 | up   |
| 5957985 | 7370484 | 1797160 | UDP-glucuronate decarboxylase 1                                   | Uxs1    | 246232 | 1,07 | down |
| 6006124 | 7370484 | 1797168 | UDP-glucuronate decarboxylase 1                                   | Uxs1    | 246232 | 1,03 | down |
| 6050989 | 7370484 | 1797160 | UDP-glucuronate decarboxylase 1                                   | Uxs1    | 246232 | 1,13 | down |
| 6091180 | 7370484 | 1797169 | UDP-glucuronate decarboxylase 1                                   | Uxs1    | 246232 | 1,73 | down |
| 6113820 | 7370484 | 1797161 | UDP-glucuronate decarboxylase 1                                   | Uxs1    | 246232 | 1,64 | down |
| 6182817 | 7370484 | 1797172 | UDP-glucuronate decarboxylase 1                                   | Uxs1    | 246232 | 1,00 | down |
| 6274130 | 7370484 | 1797179 | UDP-glucuronate decarboxylase 1                                   | Uxs1    | 246232 | 1,10 | down |
| 6377954 | 7370484 | 1797173 | UDP-glucuronate decarboxylase 1                                   | Uxs1    | 246232 | 1,24 | down |



|         |         |         |                                                                                 |         |        |      |      |
|---------|---------|---------|---------------------------------------------------------------------------------|---------|--------|------|------|
| 6428464 | 7370484 | 1797179 | UDP-glucuronate decarboxylase 1                                                 | Uxs1    | 246232 | 2,80 | up   |
| 6567284 | 7370484 | 1797167 | UDP-glucuronate decarboxylase 1                                                 | Uxs1    | 246232 | 1,33 | up   |
| 6631690 | 7370484 | 1797163 | UDP-glucuronate decarboxylase 1                                                 | Uxs1    | 246232 | 1,56 | up   |
| 6669070 | 7370484 | 1797166 | UDP-glucuronate decarboxylase 1                                                 | Uxs1    | 246232 | 1,32 | up   |
| 6738982 | 7370484 | 1797171 | UDP-glucuronate decarboxylase 1                                                 | Uxs1    | 246232 | 1,03 | up   |
| 5689290 | 7227517 | 1441289 | UDP-N-acetyl-alpha-D-galactosamine:polypeptide N-acetylglactosaminyltransferase | Galnt13 | 311039 | 1,23 | up   |
| 5720232 | 7227517 | 1441299 | UDP-N-acetyl-alpha-D-galactosamine:polypeptide N-acetylglactosaminyltransferase | Galnt13 | 311039 | 1,08 | down |
| 5841530 | 7227517 | 1441293 | UDP-N-acetyl-alpha-D-galactosamine:polypeptide N-acetylglactosaminyltransferase | Galnt13 | 311039 | 1,13 | down |
| 5949093 | 7227517 | 1441300 | UDP-N-acetyl-alpha-D-galactosamine:polypeptide N-acetylglactosaminyltransferase | Galnt13 | 311039 | 1,40 | up   |
| 5956694 | 7227517 | 1441297 | UDP-N-acetyl-alpha-D-galactosamine:polypeptide N-acetylglactosaminyltransferase | Galnt13 | 311039 | 1,92 | up   |
| 5979734 | 7227517 | 1441296 | UDP-N-acetyl-alpha-D-galactosamine:polypeptide N-acetylglactosaminyltransferase | Galnt13 | 311039 | 1,10 | down |
| 5985085 | 7227517 | 1441294 | UDP-N-acetyl-alpha-D-galactosamine:polypeptide N-acetylglactosaminyltransferase | Galnt13 | 311039 | 1,71 | down |
| 6158982 | 7227517 | 1441295 | UDP-N-acetyl-alpha-D-galactosamine:polypeptide N-acetylglactosaminyltransferase | Galnt13 | 311039 | 2,50 | down |
| 6160948 | 7227517 | 1441297 | UDP-N-acetyl-alpha-D-galactosamine:polypeptide N-acetylglactosaminyltransferase | Galnt13 | 311039 | 1,00 | up   |
| 6246054 | 7227517 | 1441289 | UDP-N-acetyl-alpha-D-galactosamine:polypeptide N-acetylglactosaminyltransferase | Galnt13 | 311039 | 1,17 | down |
| 6308439 | 7227517 | 1441290 | UDP-N-acetyl-alpha-D-galactosamine:polypeptide N-acetylglactosaminyltransferase | Galnt13 | 311039 | 1,10 | up   |
| 6474995 | 7227517 | 1441292 | UDP-N-acetyl-alpha-D-galactosamine:polypeptide N-acetylglactosaminyltransferase | Galnt13 | 311039 | 1,08 | up   |
| 6547129 | 7227517 | 1441291 | UDP-N-acetyl-alpha-D-galactosamine:polypeptide N-acetylglactosaminyltransferase | Galnt13 | 311039 | 1,06 | up   |
| 6733574 | 7227517 | 1441298 | UDP-N-acetyl-alpha-D-galactosamine:polypeptide N-acetylglactosaminyltransferase | Galnt13 | 311039 | 1,14 | down |
| 5633470 | 7295359 | 1609507 | UDP-N-acetyl-alpha-D-galactosamine:polypeptide N-acetylglactosaminyltransferase | Galnt14 | 313878 | 1,23 | up   |
| 5672181 | 7295359 | 1609501 | UDP-N-acetyl-alpha-D-galactosamine:polypeptide N-acetylglactosaminyltransferase | Galnt14 | 313878 | 1,13 | up   |
| 5700789 | 7295359 | 1609499 | UDP-N-acetyl-alpha-D-galactosamine:polypeptide N-acetylglactosaminyltransferase | Galnt14 | 313878 | 1,43 | up   |
| 5766424 | 7295359 | 1609496 | UDP-N-acetyl-alpha-D-galactosamine:polypeptide N-acetylglactosaminyltransferase | Galnt14 | 313878 | 1,07 | down |
| 5951180 | 7295359 | 1609497 | UDP-N-acetyl-alpha-D-galactosamine:polypeptide N-acetylglactosaminyltransferase | Galnt14 | 313878 | 1,31 | down |
| 5985000 | 7295359 | 1609502 | UDP-N-acetyl-alpha-D-galactosamine:polypeptide N-acetylglactosaminyltransferase | Galnt14 | 313878 | 1,04 | down |
| 5985089 | 7295359 | 1609496 | UDP-N-acetyl-alpha-D-galactosamine:polypeptide N-acetylglactosaminyltransferase | Galnt14 | 313878 | 1,27 | up   |
| 6055773 | 7295359 | 1609503 | UDP-N-acetyl-alpha-D-galactosamine:polypeptide N-acetylglactosaminyltransferase | Galnt14 | 313878 | 1,17 | down |
| 6118018 | 7295359 | 1609504 | UDP-N-acetyl-alpha-D-galactosamine:polypeptide N-acetylglactosaminyltransferase | Galnt14 | 313878 | 1,13 | down |
| 6127887 | 7295359 | 1609506 | UDP-N-acetyl-alpha-D-galactosamine:polypeptide N-acetylglactosaminyltransferase | Galnt14 | 313878 | 1,28 | down |
| 6332665 | 7295359 | 1609509 | UDP-N-acetyl-alpha-D-galactosamine:polypeptide N-acetylglactosaminyltransferase | Galnt14 | 313878 | 2,16 | up   |
| 6409525 | 7295359 | 1609511 | UDP-N-acetyl-alpha-D-galactosamine:polypeptide N-acetylglactosaminyltransferase | Galnt14 | 313878 | 1,21 | down |
| 6431820 | 7295359 | 1609510 | UDP-N-acetyl-alpha-D-galactosamine:polypeptide N-acetylglactosaminyltransferase | Galnt14 | 313878 | 1,07 | up   |
| 6467086 | 7295359 | 1609508 | UDP-N-acetyl-alpha-D-galactosamine:polypeptide N-acetylglactosaminyltransferase | Galnt14 | 313878 | 1,99 | down |
| 6473964 | 7295359 | 1609511 | UDP-N-acetyl-alpha-D-galactosamine:polypeptide N-acetylglactosaminyltransferase | Galnt14 | 313878 | 1,17 | down |
| 6523179 | 7295359 | 1609498 | UDP-N-acetyl-alpha-D-galactosamine:polypeptide N-acetylglactosaminyltransferase | Galnt14 | 313878 | 1,09 | up   |
| 6538334 | 7295359 | 1609510 | UDP-N-acetyl-alpha-D-galactosamine:polypeptide N-acetylglactosaminyltransferase | Galnt14 | 313878 | 1,52 | up   |
| 6638160 | 7295359 | 1609500 | UDP-N-acetyl-alpha-D-galactosamine:polypeptide N-acetylglactosaminyltransferase | Galnt14 | 313878 | 1,06 | down |
| 6683778 | 7295359 | 1609511 | UDP-N-acetyl-alpha-D-galactosamine:polypeptide N-acetylglactosaminyltransferase | Galnt14 | 313878 | 1,01 | up   |
| 6738092 | 7295359 | 1609505 | UDP-N-acetyl-alpha-D-galactosamine:polypeptide N-acetylglactosaminyltransferase | Galnt14 | 313878 | 1,04 | down |
| 5671586 | 7274462 | 1558534 | unc-13 homolog B (C. elegans)                                                   | Unc13b  | 64830  | 1,04 | up   |
| 5695853 | 7274462 | 1558522 | unc-13 homolog B (C. elegans)                                                   | Unc13b  | 64830  | 3,79 | up   |
| 5698376 | 7274462 | 1558525 | unc-13 homolog B (C. elegans)                                                   | Unc13b  | 64830  | 1,07 | up   |
| 5716635 | 7274462 | 1558527 | unc-13 homolog B (C. elegans)                                                   | Unc13b  | 64830  | 1,09 | up   |
| 5758270 | 7274462 | 1558524 | unc-13 homolog B (C. elegans)                                                   | Unc13b  | 64830  | 1,45 | up   |
| 5782548 | 7274462 | 1558527 | unc-13 homolog B (C. elegans)                                                   | Unc13b  | 64830  | 1,09 | down |
| 5795564 | 7274462 | 1558556 | unc-13 homolog B (C. elegans)                                                   | Unc13b  | 64830  | 1,51 | down |
| 5796345 | 7274462 | 1558527 | unc-13 homolog B (C. elegans)                                                   | Unc13b  | 64830  | 1,05 | up   |
| 5829814 | 7274462 | 1558527 | unc-13 homolog B (C. elegans)                                                   | Unc13b  | 64830  | 1,18 | down |
| 5844017 | 7274462 | 1558536 | unc-13 homolog B (C. elegans)                                                   | Unc13b  | 64830  | 1,16 | down |
| 5860253 | 7274462 | 1558537 | unc-13 homolog B (C. elegans)                                                   | Unc13b  | 64830  | 1,12 | up   |
| 5937743 | 7274462 | 1558539 | unc-13 homolog B (C. elegans)                                                   | Unc13b  | 64830  | 1,25 | up   |
| 5939402 | 7274462 | 1558517 | unc-13 homolog B (C. elegans)                                                   | Unc13b  | 64830  | 1,27 | up   |
| 6003226 | 7274462 | 1558527 | unc-13 homolog B (C. elegans)                                                   | Unc13b  | 64830  | 1,52 | down |
| 6008719 | 7274462 | 1558533 | unc-13 homolog B (C. elegans)                                                   | Unc13b  | 64830  | 1,46 | down |
| 6009791 | 7274462 | 1558545 | unc-13 homolog B (C. elegans)                                                   | Unc13b  | 64830  | 1,40 | down |
| 6044299 | 7274462 | 1558540 | unc-13 homolog B (C. elegans)                                                   | Unc13b  | 64830  | 1,41 | up   |

|         |         |         |                               |        |        |      |      |
|---------|---------|---------|-------------------------------|--------|--------|------|------|
| 6057271 | 7274462 | 1558527 | unc-13 homolog B (C. elegans) | Unc13b | 64830  | 1,23 | up   |
| 6065282 | 7274462 | 1558520 | unc-13 homolog B (C. elegans) | Unc13b | 64830  | 1,23 | up   |
| 6075170 | 7274462 | 1558549 | unc-13 homolog B (C. elegans) | Unc13b | 64830  | 1,01 | down |
| 6076960 | 7274462 | 1558537 | unc-13 homolog B (C. elegans) | Unc13b | 64830  | 1,06 | down |
| 6098548 | 7274462 | 1558541 | unc-13 homolog B (C. elegans) | Unc13b | 64830  | 1,06 | down |
| 6117563 | 7274462 | 1558551 | unc-13 homolog B (C. elegans) | Unc13b | 64830  | 1,29 | down |
| 6135462 | 7274462 | 1558555 | unc-13 homolog B (C. elegans) | Unc13b | 64830  | 1,09 | up   |
| 6202046 | 7274462 | 1558524 | unc-13 homolog B (C. elegans) | Unc13b | 64830  | 1,28 | up   |
| 6207631 | 7274462 | 1558554 | unc-13 homolog B (C. elegans) | Unc13b | 64830  | 1,36 | down |
| 6216673 | 7274462 | 1558535 | unc-13 homolog B (C. elegans) | Unc13b | 64830  | 1,06 | down |
| 6242112 | 7274462 | 1558546 | unc-13 homolog B (C. elegans) | Unc13b | 64830  | 1,34 | down |
| 6244159 | 7274462 | 1558544 | unc-13 homolog B (C. elegans) | Unc13b | 64830  | 1,08 | down |
| 6246841 | 7274462 | 1558550 | unc-13 homolog B (C. elegans) | Unc13b | 64830  | 1,38 | up   |
| 6253159 | 7274462 | 1558535 | unc-13 homolog B (C. elegans) | Unc13b | 64830  | 1,04 | down |
| 6258331 | 7274462 | 1558530 | unc-13 homolog B (C. elegans) | Unc13b | 64830  | 1,38 | down |
| 6278211 | 7274462 | 1558527 | unc-13 homolog B (C. elegans) | Unc13b | 64830  | 1,59 | down |
| 6307332 | 7274462 | 1558521 | unc-13 homolog B (C. elegans) | Unc13b | 64830  | 1,21 | up   |
| 6336696 | 7274462 | 1558547 | unc-13 homolog B (C. elegans) | Unc13b | 64830  | 1,19 | down |
| 6385148 | 7274462 | 1558526 | unc-13 homolog B (C. elegans) | Unc13b | 64830  | 1,35 | up   |
| 6389137 | 7274462 | 1558516 | unc-13 homolog B (C. elegans) | Unc13b | 64830  | 1,10 | down |
| 6401398 | 7274462 | 1558529 | unc-13 homolog B (C. elegans) | Unc13b | 64830  | 1,09 | down |
| 6411781 | 7274462 | 1558557 | unc-13 homolog B (C. elegans) | Unc13b | 64830  | 1,20 | down |
| 6454285 | 7274462 | 1558518 | unc-13 homolog B (C. elegans) | Unc13b | 64830  | 1,19 | up   |
| 6504940 | 7274462 | 1558552 | unc-13 homolog B (C. elegans) | Unc13b | 64830  | 1,11 | down |
| 6509511 | 7274462 | 1558528 | unc-13 homolog B (C. elegans) | Unc13b | 64830  | 1,27 | down |
| 6548995 | 7274462 | 1558531 | unc-13 homolog B (C. elegans) | Unc13b | 64830  | 1,06 | down |
| 6604915 | 7274462 | 1558542 | unc-13 homolog B (C. elegans) | Unc13b | 64830  | 1,24 | down |
| 6620797 | 7274462 | 1558532 | unc-13 homolog B (C. elegans) | Unc13b | 64830  | 1,05 | down |
| 6634084 | 7274462 | 1558523 | unc-13 homolog B (C. elegans) | Unc13b | 64830  | 1,57 | up   |
| 6650552 | 7274462 | 1558519 | unc-13 homolog B (C. elegans) | Unc13b | 64830  | 1,10 | up   |
| 6666106 | 7274462 | 1558548 | unc-13 homolog B (C. elegans) | Unc13b | 64830  | 1,02 | up   |
| 6677612 | 7274462 | 1558553 | unc-13 homolog B (C. elegans) | Unc13b | 64830  | 1,12 | down |
| 6680180 | 7274462 | 1558543 | unc-13 homolog B (C. elegans) | Unc13b | 64830  | 1,08 | up   |
| 6696920 | 7274462 | 1558538 | unc-13 homolog B (C. elegans) | Unc13b | 64830  | 1,13 | down |
| 5643747 | 7084520 | 1089765 | unc-13 homolog D (C. elegans) | Unc13d | 192177 | 1,04 | up   |
| 5687118 | 7084520 | 1089784 | unc-13 homolog D (C. elegans) | Unc13d | 192177 | 1,13 | up   |
| 5730155 | 7084520 | 1089790 | unc-13 homolog D (C. elegans) | Unc13d | 192177 | 1,00 | up   |
| 5740948 | 7084520 | 1089778 | unc-13 homolog D (C. elegans) | Unc13d | 192177 | 1,60 | down |
| 5789237 | 7084520 | 1089786 | unc-13 homolog D (C. elegans) | Unc13d | 192177 | 1,24 | up   |
| 5809387 | 7084520 | 1089758 | unc-13 homolog D (C. elegans) | Unc13d | 192177 | 1,39 | down |
| 5820824 | 7084520 | 1089772 | unc-13 homolog D (C. elegans) | Unc13d | 192177 | 1,18 | up   |
| 5870896 | 7084520 | 1089789 | unc-13 homolog D (C. elegans) | Unc13d | 192177 | 1,25 | down |
| 5876063 | 7084520 | 1089782 | unc-13 homolog D (C. elegans) | Unc13d | 192177 | 1,20 | down |
| 5935469 | 7084520 | 1089787 | unc-13 homolog D (C. elegans) | Unc13d | 192177 | 1,94 | up   |
| 5952233 | 7084520 | 1089769 | unc-13 homolog D (C. elegans) | Unc13d | 192177 | 1,00 | down |
| 5966764 | 7084520 | 1089771 | unc-13 homolog D (C. elegans) | Unc13d | 192177 | 1,09 | down |
| 5977295 | 7084520 | 1089766 | unc-13 homolog D (C. elegans) | Unc13d | 192177 | 1,25 | up   |
| 5987294 | 7084520 | 1089761 | unc-13 homolog D (C. elegans) | Unc13d | 192177 | 1,04 | up   |
| 6011189 | 7084520 | 1089781 | unc-13 homolog D (C. elegans) | Unc13d | 192177 | 1,80 | down |
| 6047480 | 7084520 | 1089779 | unc-13 homolog D (C. elegans) | Unc13d | 192177 | 1,16 | up   |
| 6049484 | 7084520 | 1089764 | unc-13 homolog D (C. elegans) | Unc13d | 192177 | 2,22 | down |
| 6096812 | 7084520 | 1089768 | unc-13 homolog D (C. elegans) | Unc13d | 192177 | 2,72 | up   |
| 6166076 | 7084520 | 1089773 | unc-13 homolog D (C. elegans) | Unc13d | 192177 | 1,65 | up   |
| 6201791 | 7084520 | 1089771 | unc-13 homolog D (C. elegans) | Unc13d | 192177 | 1,01 | up   |
| 6214884 | 7084520 | 1089783 | unc-13 homolog D (C. elegans) | Unc13d | 192177 | 1,10 | down |
| 6276418 | 7084520 | 1089774 | unc-13 homolog D (C. elegans) | Unc13d | 192177 | 1,74 | up   |

|         |         |         |                                   |        |        |      |      |
|---------|---------|---------|-----------------------------------|--------|--------|------|------|
| 6288210 | 7084520 | 1089788 | unc-13 homolog D (C. elegans)     | Unc13d | 192177 | 1,15 | up   |
| 6375349 | 7084520 | 1089760 | unc-13 homolog D (C. elegans)     | Unc13d | 192177 | 1,27 | down |
| 6441702 | 7084520 | 1089790 | unc-13 homolog D (C. elegans)     | Unc13d | 192177 | 1,01 | up   |
| 6448990 | 7084520 | 1089777 | unc-13 homolog D (C. elegans)     | Unc13d | 192177 | 1,13 | down |
| 6467352 | 7084520 | 1089776 | unc-13 homolog D (C. elegans)     | Unc13d | 192177 | 1,20 | up   |
| 6492140 | 7084520 | 1089759 | unc-13 homolog D (C. elegans)     | Unc13d | 192177 | 1,18 | down |
| 6499779 | 7084520 | 1089760 | unc-13 homolog D (C. elegans)     | Unc13d | 192177 | 1,68 | down |
| 6529960 | 7084520 | 1089785 | unc-13 homolog D (C. elegans)     | Unc13d | 192177 | 1,09 | up   |
| 6583150 | 7084520 | 1089763 | unc-13 homolog D (C. elegans)     | Unc13d | 192177 | 1,06 | down |
| 6615081 | 7084520 | 1089767 | unc-13 homolog D (C. elegans)     | Unc13d | 192177 | 2,45 | down |
| 6648427 | 7084520 | 1089762 | unc-13 homolog D (C. elegans)     | Unc13d | 192177 | 1,46 | up   |
| 6672311 | 7084520 | 1089770 | unc-13 homolog D (C. elegans)     | Unc13d | 192177 | 1,24 | up   |
| 6674612 | 7084520 | 1089775 | unc-13 homolog D (C. elegans)     | Unc13d | 192177 | 1,05 | down |
| 6707064 | 7084520 | 1089785 | unc-13 homolog D (C. elegans)     | Unc13d | 192177 | 1,19 | up   |
| 6724100 | 7084520 | 1089780 | unc-13 homolog D (C. elegans)     | Unc13d | 192177 | 1,41 | down |
| 5652966 | 7222806 | 1429640 | unc-5 homolog B (C. elegans)      | Unc5b  | 60630  | 1,44 | up   |
| 5679243 | 7222806 | 1429641 | unc-5 homolog B (C. elegans)      | Unc5b  | 60630  | 1,44 | up   |
| 5764100 | 7222806 | 1429637 | unc-5 homolog B (C. elegans)      | Unc5b  | 60630  | 1,08 | down |
| 5816850 | 7222806 | 1429636 | unc-5 homolog B (C. elegans)      | Unc5b  | 60630  | 1,80 | down |
| 5872828 | 7222806 | 1429649 | unc-5 homolog B (C. elegans)      | Unc5b  | 60630  | 1,40 | up   |
| 5877777 | 7222806 | 1429648 | unc-5 homolog B (C. elegans)      | Unc5b  | 60630  | 2,06 | up   |
| 5883918 | 7222806 | 1429642 | unc-5 homolog B (C. elegans)      | Unc5b  | 60630  | 1,58 | down |
| 5971208 | 7222806 | 1429651 | unc-5 homolog B (C. elegans)      | Unc5b  | 60630  | 1,53 | up   |
| 6033298 | 7222806 | 1429638 | unc-5 homolog B (C. elegans)      | Unc5b  | 60630  | 1,22 | up   |
| 6076252 | 7222806 | 1429646 | unc-5 homolog B (C. elegans)      | Unc5b  | 60630  | 1,24 | down |
| 6159016 | 7222806 | 1429639 | unc-5 homolog B (C. elegans)      | Unc5b  | 60630  | 1,02 | up   |
| 6205257 | 7222806 | 1429643 | unc-5 homolog B (C. elegans)      | Unc5b  | 60630  | 1,16 | down |
| 6292679 | 7222806 | 1429648 | unc-5 homolog B (C. elegans)      | Unc5b  | 60630  | 1,15 | up   |
| 6359479 | 7222806 | 1429643 | unc-5 homolog B (C. elegans)      | Unc5b  | 60630  | 1,19 | down |
| 6390171 | 7222806 | 1429636 | unc-5 homolog B (C. elegans)      | Unc5b  | 60630  | 1,30 | down |
| 6460175 | 7222806 | 1429645 | unc-5 homolog B (C. elegans)      | Unc5b  | 60630  | 1,16 | up   |
| 6471762 | 7222806 | 1429652 | unc-5 homolog B (C. elegans)      | Unc5b  | 60630  | 1,34 | down |
| 6510404 | 7222806 | 1429650 | unc-5 homolog B (C. elegans)      | Unc5b  | 60630  | 1,24 | down |
| 6537850 | 7222806 | 1429648 | unc-5 homolog B (C. elegans)      | Unc5b  | 60630  | 1,09 | up   |
| 6610624 | 7222806 | 1429647 | unc-5 homolog B (C. elegans)      | Unc5b  | 60630  | 1,28 | down |
| 6685728 | 7222806 | 1429644 | unc-5 homolog B (C. elegans)      | Unc5b  | 60630  | 1,39 | up   |
| 6724767 | 7222806 | 1429653 | unc-5 homolog B (C. elegans)      | Unc5b  | 60630  | 1,77 | up   |
| 5628107 | 7099271 | 1125932 | Unc-51 like kinase 1 (C. elegans) | Ulk1   | 360827 | 1,03 | down |
| 5699822 | 7099271 | 1125924 | Unc-51 like kinase 1 (C. elegans) | Ulk1   | 360827 | 1,13 | down |
| 5707839 | 7099271 | 1125946 | Unc-51 like kinase 1 (C. elegans) | Ulk1   | 360827 | 1,29 | up   |
| 5728546 | 7099271 | 1125937 | Unc-51 like kinase 1 (C. elegans) | Ulk1   | 360827 | 1,38 | up   |
| 5740442 | 7099271 | 1125930 | Unc-51 like kinase 1 (C. elegans) | Ulk1   | 360827 | 1,01 | down |
| 5760355 | 7099271 | 1125931 | Unc-51 like kinase 1 (C. elegans) | Ulk1   | 360827 | 1,19 | down |
| 5833154 | 7099271 | 1125953 | Unc-51 like kinase 1 (C. elegans) | Ulk1   | 360827 | 1,40 | down |
| 5845291 | 7099271 | 1125936 | Unc-51 like kinase 1 (C. elegans) | Ulk1   | 360827 | 1,02 | up   |
| 5889011 | 7099271 | 1125933 | Unc-51 like kinase 1 (C. elegans) | Ulk1   | 360827 | 1,26 | down |
| 5925203 | 7099271 | 1125943 | Unc-51 like kinase 1 (C. elegans) | Ulk1   | 360827 | 2,46 | up   |
| 5992428 | 7099271 | 1125938 | Unc-51 like kinase 1 (C. elegans) | Ulk1   | 360827 | 1,05 | up   |
| 5998061 | 7099271 | 1125953 | Unc-51 like kinase 1 (C. elegans) | Ulk1   | 360827 | 1,18 | up   |
| 6019527 | 7099271 | 1125944 | Unc-51 like kinase 1 (C. elegans) | Ulk1   | 360827 | 1,03 | up   |
| 6022435 | 7099271 | 1125947 | Unc-51 like kinase 1 (C. elegans) | Ulk1   | 360827 | 1,18 | down |
| 6040372 | 7099271 | 1125933 | Unc-51 like kinase 1 (C. elegans) | Ulk1   | 360827 | 1,08 | down |
| 6048588 | 7099271 | 1125945 | Unc-51 like kinase 1 (C. elegans) | Ulk1   | 360827 | 1,27 | down |
| 6090592 | 7099271 | 1125942 | Unc-51 like kinase 1 (C. elegans) | Ulk1   | 360827 | 1,01 | down |
| 6197313 | 7099271 | 1125929 | Unc-51 like kinase 1 (C. elegans) | Ulk1   | 360827 | 2,10 | up   |
| 6289555 | 7099271 | 1125952 | Unc-51 like kinase 1 (C. elegans) | Ulk1   | 360827 | 1,20 | up   |

|         |         |         |                                                      |        |        |      |      |
|---------|---------|---------|------------------------------------------------------|--------|--------|------|------|
| 6298080 | 7099271 | 1125926 | Unc-51 like kinase 1 (C. elegans)                    | Ulk1   | 360827 | 1,25 | down |
| 6321976 | 7099271 | 1125948 | Unc-51 like kinase 1 (C. elegans)                    | Ulk1   | 360827 | 1,11 | down |
| 6332248 | 7099271 | 1125949 | Unc-51 like kinase 1 (C. elegans)                    | Ulk1   | 360827 | 2,86 | down |
| 6344784 | 7099271 | 1125941 | Unc-51 like kinase 1 (C. elegans)                    | Ulk1   | 360827 | 1,58 | up   |
| 6368736 | 7099271 | 1125936 | Unc-51 like kinase 1 (C. elegans)                    | Ulk1   | 360827 | 1,23 | down |
| 6370006 | 7099271 | 1125939 | Unc-51 like kinase 1 (C. elegans)                    | Ulk1   | 360827 | 1,18 | up   |
| 6383827 | 7099271 | 1125934 | Unc-51 like kinase 1 (C. elegans)                    | Ulk1   | 360827 | 1,21 | up   |
| 6451734 | 7099271 | 1125923 | Unc-51 like kinase 1 (C. elegans)                    | Ulk1   | 360827 | 1,32 | up   |
| 6470842 | 7099271 | 1125940 | Unc-51 like kinase 1 (C. elegans)                    | Ulk1   | 360827 | 1,03 | up   |
| 6523283 | 7099271 | 1125935 | Unc-51 like kinase 1 (C. elegans)                    | Ulk1   | 360827 | 1,08 | up   |
| 6604295 | 7099271 | 1125925 | Unc-51 like kinase 1 (C. elegans)                    | Ulk1   | 360827 | 1,06 | up   |
| 6647351 | 7099271 | 1125927 | Unc-51 like kinase 1 (C. elegans)                    | Ulk1   | 360827 | 1,26 | down |
| 6735966 | 7099271 | 1125951 | Unc-51 like kinase 1 (C. elegans)                    | Ulk1   | 360827 | 1,09 | up   |
| 5854586 | 7329846 | 1694987 | unc-84 homolog B (C. elegans)                        | Unc84b | 315135 | 1,03 | up   |
| 6027928 | 7329846 | 1695006 | unc-84 homolog B (C. elegans)                        | Unc84b | 315135 | 1,63 | down |
| 6112434 | 7329846 | 1695003 | unc-84 homolog B (C. elegans)                        | Unc84b | 315135 | 2,06 | down |
| 6438865 | 7329846 | 1694987 | unc-84 homolog B (C. elegans)                        | Unc84b | 315135 | 1,32 | up   |
| 6456752 | 7329846 | 1694987 | unc-84 homolog B (C. elegans)                        | Unc84b | 315135 | 1,40 | up   |
| 5689576 | 7034569 | 972789  | uncoupling protein 3 (mitochondrial, proton carrier) | Ucp3   | 25708  | 1,56 | down |
| 5727190 | 7034569 | 972795  | uncoupling protein 3 (mitochondrial, proton carrier) | Ucp3   | 25708  | 1,17 | up   |
| 5743907 | 7034569 | 972792  | uncoupling protein 3 (mitochondrial, proton carrier) | Ucp3   | 25708  | 1,22 | down |
| 5774620 | 7034569 | 972791  | uncoupling protein 3 (mitochondrial, proton carrier) | Ucp3   | 25708  | 1,08 | up   |
| 5855481 | 7034569 | 972796  | uncoupling protein 3 (mitochondrial, proton carrier) | Ucp3   | 25708  | 1,64 | down |
| 5858107 | 7034569 | 972794  | uncoupling protein 3 (mitochondrial, proton carrier) | Ucp3   | 25708  | 2,25 | up   |
| 5889836 | 7034569 | 972793  | uncoupling protein 3 (mitochondrial, proton carrier) | Ucp3   | 25708  | 1,17 | up   |
| 5915570 | 7034569 | 972790  | uncoupling protein 3 (mitochondrial, proton carrier) | Ucp3   | 25708  | 1,24 | down |
| 6047339 | 7034569 | 972790  | uncoupling protein 3 (mitochondrial, proton carrier) | Ucp3   | 25708  | 1,08 | up   |
| 6035534 | 7340990 | 1722518 | upstream binding protein 1 (LBP-1a)                  | Ubp1   | 301038 | 1,36 | down |
| 6397910 | 7340990 | 1722500 | upstream binding protein 1 (LBP-1a)                  | Ubp1   | 301038 | 1,12 | down |
| 5666847 | 7221839 | 1427191 | ureidopropionase, beta                               | Upb1   | 116593 | 1,00 | up   |
| 5687632 | 7221839 | 1427192 | ureidopropionase, beta                               | Upb1   | 116593 | 1,13 | up   |
| 5800065 | 7221839 | 1427190 | ureidopropionase, beta                               | Upb1   | 116593 | 1,22 | down |
| 5898955 | 7221839 | 1427186 | ureidopropionase, beta                               | Upb1   | 116593 | 1,03 | down |
| 6160984 | 7221839 | 1427187 | ureidopropionase, beta                               | Upb1   | 116593 | 1,04 | up   |
| 6388585 | 7221839 | 1427189 | ureidopropionase, beta                               | Upb1   | 116593 | 1,69 | up   |
| 6424486 | 7221839 | 1427194 | ureidopropionase, beta                               | Upb1   | 116593 | 2,24 | up   |
| 6555962 | 7221839 | 1427195 | ureidopropionase, beta                               | Upb1   | 116593 | 1,33 | down |
| 6572971 | 7221839 | 1427193 | ureidopropionase, beta                               | Upb1   | 116593 | 1,11 | down |
| 6656655 | 7221839 | 1427188 | ureidopropionase, beta                               | Upb1   | 116593 | 1,02 | up   |
| 5629678 | 7290288 | 1597339 | uroporphyrinogen decarboxylase                       | Urod   | 29421  | 1,26 | down |
| 5806089 | 7290288 | 1597343 | uroporphyrinogen decarboxylase                       | Urod   | 29421  | 1,32 | up   |
| 5821151 | 7290288 | 1597338 | uroporphyrinogen decarboxylase                       | Urod   | 29421  | 1,38 | down |
| 6078989 | 7290288 | 1597339 | uroporphyrinogen decarboxylase                       | Urod   | 29421  | 1,01 | down |
| 6100601 | 7290288 | 1597337 | uroporphyrinogen decarboxylase                       | Urod   | 29421  | 1,46 | down |
| 6200286 | 7290288 | 1597342 | uroporphyrinogen decarboxylase                       | Urod   | 29421  | 1,10 | up   |
| 6316477 | 7290288 | 1597341 | uroporphyrinogen decarboxylase                       | Urod   | 29421  | 1,25 | up   |
| 6320135 | 7290288 | 1597342 | uroporphyrinogen decarboxylase                       | Urod   | 29421  | 1,15 | down |
| 6326212 | 7290288 | 1597337 | uroporphyrinogen decarboxylase                       | Urod   | 29421  | 1,28 | up   |
| 6604223 | 7290288 | 1597341 | uroporphyrinogen decarboxylase                       | Urod   | 29421  | 1,21 | down |
| 6700675 | 7290288 | 1597344 | uroporphyrinogen decarboxylase                       | Urod   | 29421  | 1,26 | up   |
| 5632819 | 7108974 | 1149806 | Usher syndrome 2A homolog (human)                    | Ush2a  | 266765 | 1,23 | down |
| 5671320 | 7108974 | 1149805 | Usher syndrome 2A homolog (human)                    | Ush2a  | 266765 | 2,06 | up   |
| 5696963 | 7108974 | 1149792 | Usher syndrome 2A homolog (human)                    | Ush2a  | 266765 | 1,07 | down |
| 5712125 | 7108974 | 1149805 | Usher syndrome 2A homolog (human)                    | Ush2a  | 266765 | 1,53 | up   |
| 5718768 | 7108974 | 1149799 | Usher syndrome 2A homolog (human)                    | Ush2a  | 266765 | 1,03 | up   |
| 5720665 | 7108974 | 1149802 | Usher syndrome 2A homolog (human)                    | Ush2a  | 266765 | 1,18 | down |

|         |         |         |                                                                         |       |        |      |      |
|---------|---------|---------|-------------------------------------------------------------------------|-------|--------|------|------|
| 5770644 | 7108974 | 1149803 | Usher syndrome 2A homolog (human)                                       | Ush2a | 266765 | 1,02 | down |
| 5800679 | 7108974 | 1149805 | Usher syndrome 2A homolog (human)                                       | Ush2a | 266765 | 2,07 | up   |
| 5829263 | 7108974 | 1149794 | Usher syndrome 2A homolog (human)                                       | Ush2a | 266765 | 1,33 | down |
| 5884730 | 7108974 | 1149798 | Usher syndrome 2A homolog (human)                                       | Ush2a | 266765 | 1,23 | down |
| 5955209 | 7108974 | 1149804 | Usher syndrome 2A homolog (human)                                       | Ush2a | 266765 | 1,23 | up   |
| 6030891 | 7108974 | 1149795 | Usher syndrome 2A homolog (human)                                       | Ush2a | 266765 | 1,07 | down |
| 6112001 | 7108974 | 1149803 | Usher syndrome 2A homolog (human)                                       | Ush2a | 266765 | 1,06 | up   |
| 6170387 | 7108974 | 1149805 | Usher syndrome 2A homolog (human)                                       | Ush2a | 266765 | 1,11 | up   |
| 6226981 | 7108974 | 1149795 | Usher syndrome 2A homolog (human)                                       | Ush2a | 266765 | 1,39 | down |
| 6259899 | 7108974 | 1149796 | Usher syndrome 2A homolog (human)                                       | Ush2a | 266765 | 1,06 | up   |
| 6284944 | 7108974 | 1149800 | Usher syndrome 2A homolog (human)                                       | Ush2a | 266765 | 1,01 | up   |
| 6361388 | 7108974 | 1149799 | Usher syndrome 2A homolog (human)                                       | Ush2a | 266765 | 1,06 | down |
| 6443732 | 7108974 | 1149801 | Usher syndrome 2A homolog (human)                                       | Ush2a | 266765 | 1,17 | down |
| 6457695 | 7108974 | 1149797 | Usher syndrome 2A homolog (human)                                       | Ush2a | 266765 | 1,32 | up   |
| 6493195 | 7108974 | 1149793 | Usher syndrome 2A homolog (human)                                       | Ush2a | 266765 | 1,09 | down |
| 6725422 | 7108974 | 1149804 | Usher syndrome 2A homolog (human)                                       | Ush2a | 266765 | 1,39 | down |
| 6733910 | 7108974 | 1149802 | Usher syndrome 2A homolog (human)                                       | Ush2a | 266765 | 1,17 | up   |
| 6744743 | 7108974 | 1149791 | Usher syndrome 2A homolog (human)                                       | Ush2a | 266765 | 1,01 | down |
| 5752029 | 7081657 | 1083075 | UTP18, small subunit (SSU) processome component, homolog (yeast)        | Utp18 | 303456 | 1,10 | up   |
| 5773971 | 7081657 | 1083077 | UTP18, small subunit (SSU) processome component, homolog (yeast)        | Utp18 | 303456 | 2,35 | up   |
| 5861223 | 7081657 | 1083069 | UTP18, small subunit (SSU) processome component, homolog (yeast)        | Utp18 | 303456 | 1,17 | up   |
| 5913349 | 7081657 | 1083068 | UTP18, small subunit (SSU) processome component, homolog (yeast)        | Utp18 | 303456 | 1,55 | down |
| 6020858 | 7081657 | 1083073 | UTP18, small subunit (SSU) processome component, homolog (yeast)        | Utp18 | 303456 | 1,09 | up   |
| 6032653 | 7081657 | 1083070 | UTP18, small subunit (SSU) processome component, homolog (yeast)        | Utp18 | 303456 | 1,25 | down |
| 6065826 | 7081657 | 1083076 | UTP18, small subunit (SSU) processome component, homolog (yeast)        | Utp18 | 303456 | 1,40 | up   |
| 6099135 | 7081657 | 1083070 | UTP18, small subunit (SSU) processome component, homolog (yeast)        | Utp18 | 303456 | 1,19 | up   |
| 6106891 | 7081657 | 1083066 | UTP18, small subunit (SSU) processome component, homolog (yeast)        | Utp18 | 303456 | 1,10 | up   |
| 6250884 | 7081657 | 1083071 | UTP18, small subunit (SSU) processome component, homolog (yeast)        | Utp18 | 303456 | 1,17 | up   |
| 6377331 | 7081657 | 1083079 | UTP18, small subunit (SSU) processome component, homolog (yeast)        | Utp18 | 303456 | 1,02 | up   |
| 6401632 | 7081657 | 1083072 | UTP18, small subunit (SSU) processome component, homolog (yeast)        | Utp18 | 303456 | 1,17 | up   |
| 6432010 | 7081657 | 1083065 | UTP18, small subunit (SSU) processome component, homolog (yeast)        | Utp18 | 303456 | 1,32 | up   |
| 6476512 | 7081657 | 1083079 | UTP18, small subunit (SSU) processome component, homolog (yeast)        | Utp18 | 303456 | 2,53 | down |
| 6568457 | 7081657 | 1083067 | UTP18, small subunit (SSU) processome component, homolog (yeast)        | Utp18 | 303456 | 1,31 | down |
| 5978090 | 7323545 | 1679920 | UTP20, small subunit (SSU) processome component, homolog (yeast)        | Utp20 | 314713 | 1,85 | down |
| 6152348 | 7323545 | 1679920 | UTP20, small subunit (SSU) processome component, homolog (yeast)        | Utp20 | 314713 | 1,39 | down |
| 5806809 | 7124168 | 1187368 | UTP3, small subunit (SSU) processome component, homolog (S. cerevisiae) | Utp3  | 305258 | 1,17 | up   |
| 5841643 | 7124168 | 1187368 | UTP3, small subunit (SSU) processome component, homolog (S. cerevisiae) | Utp3  | 305258 | 1,10 | down |
| 5937083 | 7124168 | 1187367 | UTP3, small subunit (SSU) processome component, homolog (S. cerevisiae) | Utp3  | 305258 | 2,06 | down |
| 6075418 | 7124168 | 1187366 | UTP3, small subunit (SSU) processome component, homolog (S. cerevisiae) | Utp3  | 305258 | 1,32 | down |
| 6349488 | 7124168 | 1187367 | UTP3, small subunit (SSU) processome component, homolog (S. cerevisiae) | Utp3  | 305258 | 1,62 | up   |
| 6466723 | 7124168 | 1187367 | UTP3, small subunit (SSU) processome component, homolog (S. cerevisiae) | Utp3  | 305258 | 1,02 | down |
| 6575746 | 7124168 | 1187367 | UTP3, small subunit (SSU) processome component, homolog (S. cerevisiae) | Utp3  | 305258 | 1,78 | up   |
| 5626402 | 7044211 | 996281  | utrophin                                                                | Utrn  | 25600  | 1,02 | up   |
| 5627805 | 7044211 | 996265  | utrophin                                                                | Utrn  | 25600  | 1,07 | up   |
| 5650797 | 7044211 | 996290  | utrophin                                                                | Utrn  | 25600  | 1,00 | down |
| 5675236 | 7044211 | 996287  | utrophin                                                                | Utrn  | 25600  | 1,28 | down |
| 5717161 | 7044211 | 996227  | utrophin                                                                | Utrn  | 25600  | 1,12 | down |
| 5742344 | 7044211 | 996238  | utrophin                                                                | Utrn  | 25600  | 1,18 | down |
| 5749075 | 7044211 | 996285  | utrophin                                                                | Utrn  | 25600  | 1,20 | down |
| 5780946 | 7044211 | 996292  | utrophin                                                                | Utrn  | 25600  | 1,32 | down |
| 5783325 | 7044211 | 996271  | utrophin                                                                | Utrn  | 25600  | 1,07 | up   |
| 5800798 | 7044211 | 996221  | utrophin                                                                | Utrn  | 25600  | 1,38 | down |
| 5873031 | 7044211 | 996282  | utrophin                                                                | Utrn  | 25600  | 1,21 | down |
| 5880293 | 7044211 | 996264  | utrophin                                                                | Utrn  | 25600  | 1,02 | down |
| 5897943 | 7044211 | 996289  | utrophin                                                                | Utrn  | 25600  | 1,08 | down |
| 5928204 | 7044211 | 996253  | utrophin                                                                | Utrn  | 25600  | 1,20 | up   |

|         |         |        |          |      |       |      |      |
|---------|---------|--------|----------|------|-------|------|------|
| 5952377 | 7044211 | 996250 | utrophin | Utrn | 25600 | 1,10 | up   |
| 5964977 | 7044211 | 996229 | utrophin | Utrn | 25600 | 1,43 | down |
| 5979168 | 7044211 | 996251 | utrophin | Utrn | 25600 | 1,07 | down |
| 6014465 | 7044211 | 996226 | utrophin | Utrn | 25600 | 1,03 | down |
| 6027062 | 7044211 | 996273 | utrophin | Utrn | 25600 | 1,06 | up   |
| 6040657 | 7044211 | 996263 | utrophin | Utrn | 25600 | 1,91 | up   |
| 6048684 | 7044211 | 996287 | utrophin | Utrn | 25600 | 1,20 | down |
| 6056804 | 7044211 | 996223 | utrophin | Utrn | 25600 | 1,22 | down |
| 6087225 | 7044211 | 996252 | utrophin | Utrn | 25600 | 1,24 | up   |
| 6101235 | 7044211 | 996258 | utrophin | Utrn | 25600 | 1,08 | up   |
| 6106484 | 7044211 | 996222 | utrophin | Utrn | 25600 | 1,10 | down |
| 6110950 | 7044211 | 996244 | utrophin | Utrn | 25600 | 1,16 | down |
| 6146549 | 7044211 | 996239 | utrophin | Utrn | 25600 | 1,11 | down |
| 6150756 | 7044211 | 996260 | utrophin | Utrn | 25600 | 1,21 | down |
| 6156096 | 7044211 | 996228 | utrophin | Utrn | 25600 | 1,00 | down |
| 6158685 | 7044211 | 996254 | utrophin | Utrn | 25600 | 1,47 | up   |
| 6183139 | 7044211 | 996242 | utrophin | Utrn | 25600 | 1,15 | up   |
| 6185849 | 7044211 | 996283 | utrophin | Utrn | 25600 | 1,25 | down |
| 6199319 | 7044211 | 996225 | utrophin | Utrn | 25600 | 1,42 | down |
| 6211745 | 7044211 | 996231 | utrophin | Utrn | 25600 | 1,16 | up   |
| 6213856 | 7044211 | 996268 | utrophin | Utrn | 25600 | 1,27 | down |
| 6215741 | 7044211 | 996237 | utrophin | Utrn | 25600 | 1,05 | down |
| 6219333 | 7044211 | 996223 | utrophin | Utrn | 25600 | 1,02 | down |
| 6222490 | 7044211 | 996259 | utrophin | Utrn | 25600 | 1,02 | down |
| 6225845 | 7044211 | 996224 | utrophin | Utrn | 25600 | 1,11 | down |
| 6231702 | 7044211 | 996274 | utrophin | Utrn | 25600 | 1,13 | up   |
| 6233460 | 7044211 | 996269 | utrophin | Utrn | 25600 | 1,03 | up   |
| 6241522 | 7044211 | 996243 | utrophin | Utrn | 25600 | 1,02 | up   |
| 6263234 | 7044211 | 996233 | utrophin | Utrn | 25600 | 1,13 | up   |
| 6267309 | 7044211 | 996235 | utrophin | Utrn | 25600 | 1,10 | down |
| 6288458 | 7044211 | 996246 | utrophin | Utrn | 25600 | 1,37 | down |
| 6289728 | 7044211 | 996245 | utrophin | Utrn | 25600 | 1,04 | down |
| 6290335 | 7044211 | 996247 | utrophin | Utrn | 25600 | 1,31 | up   |
| 6292680 | 7044211 | 996275 | utrophin | Utrn | 25600 | 1,29 | down |
| 6308312 | 7044211 | 996255 | utrophin | Utrn | 25600 | 1,14 | down |
| 6312751 | 7044211 | 996249 | utrophin | Utrn | 25600 | 1,01 | up   |
| 6323129 | 7044211 | 996266 | utrophin | Utrn | 25600 | 1,07 | up   |
| 6323184 | 7044211 | 996232 | utrophin | Utrn | 25600 | 1,17 | up   |
| 6336632 | 7044211 | 996286 | utrophin | Utrn | 25600 | 1,12 | down |
| 6338931 | 7044211 | 996256 | utrophin | Utrn | 25600 | 1,05 | down |
| 6365541 | 7044211 | 996270 | utrophin | Utrn | 25600 | 1,01 | up   |
| 6374390 | 7044211 | 996267 | utrophin | Utrn | 25600 | 1,32 | up   |
| 6405460 | 7044211 | 996262 | utrophin | Utrn | 25600 | 1,06 | up   |
| 6422905 | 7044211 | 996293 | utrophin | Utrn | 25600 | 2,61 | up   |
| 6431981 | 7044211 | 996278 | utrophin | Utrn | 25600 | 1,09 | down |
| 6464178 | 7044211 | 996240 | utrophin | Utrn | 25600 | 1,24 | up   |
| 6486714 | 7044211 | 996276 | utrophin | Utrn | 25600 | 1,05 | up   |
| 6493848 | 7044211 | 996277 | utrophin | Utrn | 25600 | 1,06 | up   |
| 6497826 | 7044211 | 996272 | utrophin | Utrn | 25600 | 1,06 | down |
| 6525121 | 7044211 | 996288 | utrophin | Utrn | 25600 | 1,07 | up   |
| 6526227 | 7044211 | 996280 | utrophin | Utrn | 25600 | 1,34 | up   |
| 6538878 | 7044211 | 996234 | utrophin | Utrn | 25600 | 1,09 | down |
| 6542184 | 7044211 | 996230 | utrophin | Utrn | 25600 | 1,31 | down |
| 6571665 | 7044211 | 996241 | utrophin | Utrn | 25600 | 1,21 | down |
| 6582441 | 7044211 | 996277 | utrophin | Utrn | 25600 | 1,12 | up   |
| 6620559 | 7044211 | 996236 | utrophin | Utrn | 25600 | 1,16 | down |

|         |         |         |                                                       |        |        |      |      |
|---------|---------|---------|-------------------------------------------------------|--------|--------|------|------|
| 6634064 | 7044211 | 996279  | utrophin                                              | Utrn   | 25600  | 1,02 | up   |
| 6638534 | 7044211 | 996248  | utrophin                                              | Utrn   | 25600  | 1,10 | up   |
| 6672677 | 7044211 | 996291  | utrophin                                              | Utrn   | 25600  | 1,17 | down |
| 6674248 | 7044211 | 996284  | utrophin                                              | Utrn   | 25600  | 1,22 | up   |
| 6702574 | 7044211 | 996293  | utrophin                                              | Utrn   | 25600  | 1,89 | up   |
| 6707300 | 7044211 | 996283  | utrophin                                              | Utrn   | 25600  | 1,08 | up   |
| 6724911 | 7044211 | 996257  | utrophin                                              | Utrn   | 25600  | 1,04 | up   |
| 6727428 | 7044211 | 996261  | utrophin                                              | Utrn   | 25600  | 1,25 | up   |
| 5707494 | 7301439 | 1625380 | vaccinia related kinase 1                             | Vrk1   | 362779 | 1,35 | down |
| 5714000 | 7301439 | 1625392 | vaccinia related kinase 1                             | Vrk1   | 362779 | 1,14 | up   |
| 5743368 | 7301439 | 1625392 | vaccinia related kinase 1                             | Vrk1   | 362779 | 1,29 | down |
| 5835139 | 7301439 | 1625383 | vaccinia related kinase 1                             | Vrk1   | 362779 | 1,17 | down |
| 5973000 | 7301439 | 1625380 | vaccinia related kinase 1                             | Vrk1   | 362779 | 1,19 | down |
| 6055904 | 7301439 | 1625387 | vaccinia related kinase 1                             | Vrk1   | 362779 | 2,06 | down |
| 6080813 | 7301439 | 1625391 | vaccinia related kinase 1                             | Vrk1   | 362779 | 1,35 | down |
| 6120475 | 7301439 | 1625385 | vaccinia related kinase 1                             | Vrk1   | 362779 | 1,45 | up   |
| 6209780 | 7301439 | 1625382 | vaccinia related kinase 1                             | Vrk1   | 362779 | 1,15 | up   |
| 6251349 | 7301439 | 1625384 | vaccinia related kinase 1                             | Vrk1   | 362779 | 1,76 | up   |
| 6294877 | 7301439 | 1625391 | vaccinia related kinase 1                             | Vrk1   | 362779 | 1,00 | up   |
| 6465993 | 7301439 | 1625389 | vaccinia related kinase 1                             | Vrk1   | 362779 | 1,13 | up   |
| 6512629 | 7301439 | 1625380 | vaccinia related kinase 1                             | Vrk1   | 362779 | 1,25 | down |
| 6524480 | 7301439 | 1625390 | vaccinia related kinase 1                             | Vrk1   | 362779 | 1,16 | down |
| 6595417 | 7301439 | 1625388 | vaccinia related kinase 1                             | Vrk1   | 362779 | 1,02 | down |
| 6613425 | 7301439 | 1625386 | vaccinia related kinase 1                             | Vrk1   | 362779 | 1,93 | down |
| 6618563 | 7301439 | 1625381 | vaccinia related kinase 1                             | Vrk1   | 362779 | 1,29 | up   |
| 5633090 | 7060851 | 1033371 | vacuolar protein sorting 13 homolog A (S. cerevisiae) | Vps13a | 309243 | 1,10 | down |
| 5660212 | 7060851 | 1033386 | vacuolar protein sorting 13 homolog A (S. cerevisiae) | Vps13a | 309243 | 1,23 | up   |
| 5660664 | 7060851 | 1033390 | vacuolar protein sorting 13 homolog A (S. cerevisiae) | Vps13a | 309243 | 1,09 | up   |
| 5709262 | 7060851 | 1033380 | vacuolar protein sorting 13 homolog A (S. cerevisiae) | Vps13a | 309243 | 1,07 | up   |
| 5756273 | 7060851 | 1033381 | vacuolar protein sorting 13 homolog A (S. cerevisiae) | Vps13a | 309243 | 1,94 | up   |
| 5895652 | 7060851 | 1033373 | vacuolar protein sorting 13 homolog A (S. cerevisiae) | Vps13a | 309243 | 1,17 | up   |
| 5910324 | 7060851 | 1033391 | vacuolar protein sorting 13 homolog A (S. cerevisiae) | Vps13a | 309243 | 1,36 | up   |
| 5915524 | 7060851 | 1033378 | vacuolar protein sorting 13 homolog A (S. cerevisiae) | Vps13a | 309243 | 1,02 | up   |
| 5989463 | 7060851 | 1033374 | vacuolar protein sorting 13 homolog A (S. cerevisiae) | Vps13a | 309243 | 1,13 | down |
| 6031698 | 7060851 | 1033389 | vacuolar protein sorting 13 homolog A (S. cerevisiae) | Vps13a | 309243 | 1,23 | down |
| 6107328 | 7060851 | 1033383 | vacuolar protein sorting 13 homolog A (S. cerevisiae) | Vps13a | 309243 | 1,15 | down |
| 6142873 | 7060851 | 1033375 | vacuolar protein sorting 13 homolog A (S. cerevisiae) | Vps13a | 309243 | 1,29 | up   |
| 6230947 | 7060851 | 1033369 | vacuolar protein sorting 13 homolog A (S. cerevisiae) | Vps13a | 309243 | 1,51 | down |
| 6248473 | 7060851 | 1033375 | vacuolar protein sorting 13 homolog A (S. cerevisiae) | Vps13a | 309243 | 1,43 | down |
| 6353007 | 7060851 | 1033388 | vacuolar protein sorting 13 homolog A (S. cerevisiae) | Vps13a | 309243 | 1,05 | down |
| 6398774 | 7060851 | 1033384 | vacuolar protein sorting 13 homolog A (S. cerevisiae) | Vps13a | 309243 | 1,43 | up   |
| 6429198 | 7060851 | 1033373 | vacuolar protein sorting 13 homolog A (S. cerevisiae) | Vps13a | 309243 | 1,08 | down |
| 6437581 | 7060851 | 1033367 | vacuolar protein sorting 13 homolog A (S. cerevisiae) | Vps13a | 309243 | 1,11 | down |
| 6449221 | 7060851 | 1033382 | vacuolar protein sorting 13 homolog A (S. cerevisiae) | Vps13a | 309243 | 1,61 | down |
| 6473442 | 7060851 | 1033379 | vacuolar protein sorting 13 homolog A (S. cerevisiae) | Vps13a | 309243 | 1,28 | up   |
| 6541496 | 7060851 | 1033392 | vacuolar protein sorting 13 homolog A (S. cerevisiae) | Vps13a | 309243 | 1,12 | up   |
| 6567913 | 7060851 | 1033387 | vacuolar protein sorting 13 homolog A (S. cerevisiae) | Vps13a | 309243 | 1,13 | up   |
| 6581515 | 7060851 | 1033385 | vacuolar protein sorting 13 homolog A (S. cerevisiae) | Vps13a | 309243 | 1,07 | down |
| 6612224 | 7060851 | 1033393 | vacuolar protein sorting 13 homolog A (S. cerevisiae) | Vps13a | 309243 | 1,33 | up   |
| 6661714 | 7060851 | 1033370 | vacuolar protein sorting 13 homolog A (S. cerevisiae) | Vps13a | 309243 | 1,03 | down |
| 5620214 | 7039728 | 984844  | vacuolar protein sorting 37 homolog C (S. cerevisiae) | Vps37c | 308178 | 1,25 | up   |
| 5665216 | 7039728 | 984846  | vacuolar protein sorting 37 homolog C (S. cerevisiae) | Vps37c | 308178 | 1,77 | up   |
| 5695800 | 7039728 | 984846  | vacuolar protein sorting 37 homolog C (S. cerevisiae) | Vps37c | 308178 | 1,57 | down |
| 5710786 | 7039728 | 984848  | vacuolar protein sorting 37 homolog C (S. cerevisiae) | Vps37c | 308178 | 1,17 | up   |
| 5783390 | 7039728 | 984848  | vacuolar protein sorting 37 homolog C (S. cerevisiae) | Vps37c | 308178 | 1,63 | down |
| 6081092 | 7039728 | 984846  | vacuolar protein sorting 37 homolog C (S. cerevisiae) | Vps37c | 308178 | 1,04 | down |

|         |         |         |                                                       |        |        |      |      |
|---------|---------|---------|-------------------------------------------------------|--------|--------|------|------|
| 6100186 | 7039728 | 984846  | vacuolar protein sorting 37 homolog C (S. cerevisiae) | Vps37c | 308178 | 1,16 | up   |
| 6194913 | 7039728 | 984845  | vacuolar protein sorting 37 homolog C (S. cerevisiae) | Vps37c | 308178 | 1,13 | up   |
| 6231952 | 7039728 | 984846  | vacuolar protein sorting 37 homolog C (S. cerevisiae) | Vps37c | 308178 | 1,12 | up   |
| 6318410 | 7039728 | 984846  | vacuolar protein sorting 37 homolog C (S. cerevisiae) | Vps37c | 308178 | 1,26 | up   |
| 6333095 | 7039728 | 984847  | vacuolar protein sorting 37 homolog C (S. cerevisiae) | Vps37c | 308178 | 1,12 | down |
| 6470856 | 7039728 | 984848  | vacuolar protein sorting 37 homolog C (S. cerevisiae) | Vps37c | 308178 | 1,31 | up   |
| 6659757 | 7039728 | 984838  | vacuolar protein sorting 37 homolog C (S. cerevisiae) | Vps37c | 308178 | 1,55 | down |
| 6715596 | 7039728 | 984843  | vacuolar protein sorting 37 homolog C (S. cerevisiae) | Vps37c | 308178 | 1,38 | up   |
| 6732262 | 7039728 | 984846  | vacuolar protein sorting 37 homolog C (S. cerevisiae) | Vps37c | 308178 | 1,32 | up   |
| 5766487 | 7109863 | 1152005 | vacuolar protein sorting 4 homolog B (S. cerevisiae)  | Vps4b  | 360834 | 1,06 | down |
| 5809754 | 7109863 | 1152000 | vacuolar protein sorting 4 homolog B (S. cerevisiae)  | Vps4b  | 360834 | 1,19 | down |
| 5894897 | 7109863 | 1152001 | vacuolar protein sorting 4 homolog B (S. cerevisiae)  | Vps4b  | 360834 | 1,03 | down |
| 5911798 | 7109863 | 1152009 | vacuolar protein sorting 4 homolog B (S. cerevisiae)  | Vps4b  | 360834 | 1,06 | down |
| 5951252 | 7109863 | 1152006 | vacuolar protein sorting 4 homolog B (S. cerevisiae)  | Vps4b  | 360834 | 1,28 | down |
| 5956961 | 7109863 | 1152011 | vacuolar protein sorting 4 homolog B (S. cerevisiae)  | Vps4b  | 360834 | 1,09 | down |
| 6063520 | 7109863 | 1152012 | vacuolar protein sorting 4 homolog B (S. cerevisiae)  | Vps4b  | 360834 | 1,04 | up   |
| 6386453 | 7109863 | 1152012 | vacuolar protein sorting 4 homolog B (S. cerevisiae)  | Vps4b  | 360834 | 2,31 | up   |
| 6479671 | 7109863 | 1152003 | vacuolar protein sorting 4 homolog B (S. cerevisiae)  | Vps4b  | 360834 | 1,33 | up   |
| 6548873 | 7109863 | 1152000 | vacuolar protein sorting 4 homolog B (S. cerevisiae)  | Vps4b  | 360834 | 1,39 | down |
| 6592482 | 7109863 | 1152010 | vacuolar protein sorting 4 homolog B (S. cerevisiae)  | Vps4b  | 360834 | 1,09 | up   |
| 6593595 | 7109863 | 1152007 | vacuolar protein sorting 4 homolog B (S. cerevisiae)  | Vps4b  | 360834 | 1,07 | down |
| 6725428 | 7109863 | 1152004 | vacuolar protein sorting 4 homolog B (S. cerevisiae)  | Vps4b  | 360834 | 1,21 | down |
| 5723971 | 7030015 | 960661  | v-akt murine thymoma viral oncogene homolog 2         | Akt2   | 25233  | 1,38 | down |
| 5741888 | 7030015 | 960660  | v-akt murine thymoma viral oncogene homolog 2         | Akt2   | 25233  | 1,03 | up   |
| 5897610 | 7030015 | 960668  | v-akt murine thymoma viral oncogene homolog 2         | Akt2   | 25233  | 1,20 | up   |
| 5902930 | 7030015 | 960665  | v-akt murine thymoma viral oncogene homolog 2         | Akt2   | 25233  | 1,01 | up   |
| 6006341 | 7030015 | 960666  | v-akt murine thymoma viral oncogene homolog 2         | Akt2   | 25233  | 1,00 | down |
| 6029573 | 7030015 | 960657  | v-akt murine thymoma viral oncogene homolog 2         | Akt2   | 25233  | 1,04 | down |
| 6086551 | 7030015 | 960655  | v-akt murine thymoma viral oncogene homolog 2         | Akt2   | 25233  | 2,17 | down |
| 6204768 | 7030015 | 960662  | v-akt murine thymoma viral oncogene homolog 2         | Akt2   | 25233  | 1,17 | up   |
| 6226724 | 7030015 | 960656  | v-akt murine thymoma viral oncogene homolog 2         | Akt2   | 25233  | 1,18 | up   |
| 6233573 | 7030015 | 960667  | v-akt murine thymoma viral oncogene homolog 2         | Akt2   | 25233  | 1,22 | up   |
| 6241346 | 7030015 | 960656  | v-akt murine thymoma viral oncogene homolog 2         | Akt2   | 25233  | 1,10 | up   |
| 6394270 | 7030015 | 960658  | v-akt murine thymoma viral oncogene homolog 2         | Akt2   | 25233  | 1,12 | up   |
| 6404216 | 7030015 | 960663  | v-akt murine thymoma viral oncogene homolog 2         | Akt2   | 25233  | 1,09 | up   |
| 6494750 | 7030015 | 960659  | v-akt murine thymoma viral oncogene homolog 2         | Akt2   | 25233  | 1,13 | up   |
| 6569433 | 7030015 | 960664  | v-akt murine thymoma viral oncogene homolog 2         | Akt2   | 25233  | 1,15 | up   |
| 5653970 | 7302307 | 1627591 | vasoactive intestinal peptide receptor 2              | Vipr2  | 29555  | 1,79 | up   |
| 5733794 | 7302307 | 1627600 | vasoactive intestinal peptide receptor 2              | Vipr2  | 29555  | 1,83 | down |
| 5746294 | 7302307 | 1627593 | vasoactive intestinal peptide receptor 2              | Vipr2  | 29555  | 1,34 | up   |
| 5851905 | 7302307 | 1627602 | vasoactive intestinal peptide receptor 2              | Vipr2  | 29555  | 1,17 | down |
| 5921472 | 7302307 | 1627597 | vasoactive intestinal peptide receptor 2              | Vipr2  | 29555  | 1,10 | up   |
| 5928465 | 7302307 | 1627598 | vasoactive intestinal peptide receptor 2              | Vipr2  | 29555  | 1,13 | up   |
| 5953233 | 7302307 | 1627604 | vasoactive intestinal peptide receptor 2              | Vipr2  | 29555  | 1,03 | down |
| 6024849 | 7302307 | 1627592 | vasoactive intestinal peptide receptor 2              | Vipr2  | 29555  | 1,46 | up   |
| 6035874 | 7302307 | 1627595 | vasoactive intestinal peptide receptor 2              | Vipr2  | 29555  | 1,05 | down |
| 6146329 | 7302307 | 1627597 | vasoactive intestinal peptide receptor 2              | Vipr2  | 29555  | 1,22 | down |
| 6323852 | 7302307 | 1627601 | vasoactive intestinal peptide receptor 2              | Vipr2  | 29555  | 1,05 | down |
| 6328935 | 7302307 | 1627594 | vasoactive intestinal peptide receptor 2              | Vipr2  | 29555  | 1,24 | down |
| 6351318 | 7302307 | 1627591 | vasoactive intestinal peptide receptor 2              | Vipr2  | 29555  | 2,13 | up   |
| 6354589 | 7302307 | 1627604 | vasoactive intestinal peptide receptor 2              | Vipr2  | 29555  | 1,55 | down |
| 6571320 | 7302307 | 1627604 | vasoactive intestinal peptide receptor 2              | Vipr2  | 29555  | 1,31 | down |
| 6581187 | 7302307 | 1627599 | vasoactive intestinal peptide receptor 2              | Vipr2  | 29555  | 1,37 | down |
| 6651199 | 7302307 | 1627596 | vasoactive intestinal peptide receptor 2              | Vipr2  | 29555  | 1,19 | up   |
| 6746922 | 7302307 | 1627603 | vasoactive intestinal peptide receptor 2              | Vipr2  | 29555  | 1,77 | down |
| 5626801 | 7237132 | 1466107 | vav 2 guanine nucleotide exchange factor              | Vav2   | 296603 | 1,28 | up   |



|         |         |         |                                                            |       |        |      |      |
|---------|---------|---------|------------------------------------------------------------|-------|--------|------|------|
| 5640333 | 7237132 | 1466130 | vav 2 guanine nucleotide exchange factor                   | Vav2  | 296603 | 1,17 | down |
| 5720421 | 7237132 | 1466132 | vav 2 guanine nucleotide exchange factor                   | Vav2  | 296603 | 1,02 | down |
| 5736773 | 7237132 | 1466131 | vav 2 guanine nucleotide exchange factor                   | Vav2  | 296603 | 1,37 | down |
| 5765420 | 7237132 | 1466124 | vav 2 guanine nucleotide exchange factor                   | Vav2  | 296603 | 1,13 | up   |
| 5813317 | 7237132 | 1466119 | vav 2 guanine nucleotide exchange factor                   | Vav2  | 296603 | 1,12 | up   |
| 5874270 | 7237132 | 1466105 | vav 2 guanine nucleotide exchange factor                   | Vav2  | 296603 | 1,08 | down |
| 5896299 | 7237132 | 1466105 | vav 2 guanine nucleotide exchange factor                   | Vav2  | 296603 | 1,50 | up   |
| 5971664 | 7237132 | 1466105 | vav 2 guanine nucleotide exchange factor                   | Vav2  | 296603 | 1,19 | down |
| 6099207 | 7237132 | 1466128 | vav 2 guanine nucleotide exchange factor                   | Vav2  | 296603 | 1,06 | down |
| 6106127 | 7237132 | 1466118 | vav 2 guanine nucleotide exchange factor                   | Vav2  | 296603 | 1,24 | down |
| 6113932 | 7237132 | 1466105 | vav 2 guanine nucleotide exchange factor                   | Vav2  | 296603 | 1,29 | down |
| 6136833 | 7237132 | 1466105 | vav 2 guanine nucleotide exchange factor                   | Vav2  | 296603 | 1,32 | down |
| 6148168 | 7237132 | 1466140 | vav 2 guanine nucleotide exchange factor                   | Vav2  | 296603 | 1,03 | down |
| 6156588 | 7237132 | 1466171 | vav 2 guanine nucleotide exchange factor                   | Vav2  | 296603 | 1,53 | down |
| 6185843 | 7237132 | 1466121 | vav 2 guanine nucleotide exchange factor                   | Vav2  | 296603 | 1,55 | up   |
| 6247651 | 7237132 | 1466151 | vav 2 guanine nucleotide exchange factor                   | Vav2  | 296603 | 1,25 | up   |
| 6262640 | 7237132 | 1466122 | vav 2 guanine nucleotide exchange factor                   | Vav2  | 296603 | 1,35 | down |
| 6290614 | 7237132 | 1466116 | vav 2 guanine nucleotide exchange factor                   | Vav2  | 296603 | 1,32 | down |
| 6317692 | 7237132 | 1466186 | vav 2 guanine nucleotide exchange factor                   | Vav2  | 296603 | 1,32 | down |
| 6322028 | 7237132 | 1466105 | vav 2 guanine nucleotide exchange factor                   | Vav2  | 296603 | 1,91 | up   |
| 6331070 | 7237132 | 1466135 | vav 2 guanine nucleotide exchange factor                   | Vav2  | 296603 | 1,12 | down |
| 6388799 | 7237132 | 1466137 | vav 2 guanine nucleotide exchange factor                   | Vav2  | 296603 | 1,23 | up   |
| 6456380 | 7237132 | 1466108 | vav 2 guanine nucleotide exchange factor                   | Vav2  | 296603 | 2,45 | up   |
| 6503403 | 7237132 | 1466127 | vav 2 guanine nucleotide exchange factor                   | Vav2  | 296603 | 1,12 | down |
| 6518333 | 7237132 | 1466112 | vav 2 guanine nucleotide exchange factor                   | Vav2  | 296603 | 1,25 | down |
| 6543422 | 7237132 | 1466126 | vav 2 guanine nucleotide exchange factor                   | Vav2  | 296603 | 1,11 | down |
| 6578420 | 7237132 | 1466125 | vav 2 guanine nucleotide exchange factor                   | Vav2  | 296603 | 1,21 | down |
| 6592677 | 7237132 | 1466129 | vav 2 guanine nucleotide exchange factor                   | Vav2  | 296603 | 1,06 | up   |
| 6611096 | 7237132 | 1466187 | vav 2 guanine nucleotide exchange factor                   | Vav2  | 296603 | 2,03 | up   |
| 6647360 | 7237132 | 1466114 | vav 2 guanine nucleotide exchange factor                   | Vav2  | 296603 | 1,12 | up   |
| 6702360 | 7237132 | 1466110 | vav 2 guanine nucleotide exchange factor                   | Vav2  | 296603 | 1,30 | up   |
| 5657901 | 7064228 | 1041814 | ventral anterior homeobox 1                                | Vax1  | 64571  | 1,01 | up   |
| 5662887 | 7064228 | 1041816 | ventral anterior homeobox 1                                | Vax1  | 64571  | 1,03 | up   |
| 5724416 | 7064228 | 1041814 | ventral anterior homeobox 1                                | Vax1  | 64571  | 1,34 | down |
| 5791795 | 7064228 | 1041815 | ventral anterior homeobox 1                                | Vax1  | 64571  | 1,01 | up   |
| 5878363 | 7064228 | 1041814 | ventral anterior homeobox 1                                | Vax1  | 64571  | 1,06 | down |
| 5971386 | 7064228 | 1041814 | ventral anterior homeobox 1                                | Vax1  | 64571  | 2,26 | down |
| 6240441 | 7064228 | 1041814 | ventral anterior homeobox 1                                | Vax1  | 64571  | 1,11 | down |
| 6564537 | 7064228 | 1041814 | ventral anterior homeobox 1                                | Vax1  | 64571  | 1,56 | up   |
| 6596563 | 7064228 | 1041814 | ventral anterior homeobox 1                                | Vax1  | 64571  | 1,41 | up   |
| 6036448 | 7255502 | 1511285 | ventral anterior homeobox 2                                | Vax2  | 64572  | 1,13 | down |
| 6113994 | 7255502 | 1511285 | ventral anterior homeobox 2                                | Vax2  | 64572  | 1,15 | down |
| 6217476 | 7255502 | 1511285 | ventral anterior homeobox 2                                | Vax2  | 64572  | 1,08 | down |
| 6342238 | 7255502 | 1511283 | ventral anterior homeobox 2                                | Vax2  | 64572  | 2,37 | up   |
| 6530240 | 7255502 | 1511285 | ventral anterior homeobox 2                                | Vax2  | 64572  | 1,93 | up   |
| 6605215 | 7255502 | 1511284 | ventral anterior homeobox 2                                | Vax2  | 64572  | 1,03 | down |
| 6649694 | 7255502 | 1511285 | ventral anterior homeobox 2                                | Vax2  | 64572  | 1,31 | down |
| 5623254 | 7209367 | 1397549 | ventricular zone expressed PH domain homolog 1 (zebrafish) | Veph1 | 361954 | 1,02 | down |
| 5662683 | 7209367 | 1397540 | ventricular zone expressed PH domain homolog 1 (zebrafish) | Veph1 | 361954 | 1,19 | up   |
| 5765062 | 7209367 | 1397546 | ventricular zone expressed PH domain homolog 1 (zebrafish) | Veph1 | 361954 | 1,23 | up   |
| 5852872 | 7209367 | 1397537 | ventricular zone expressed PH domain homolog 1 (zebrafish) | Veph1 | 361954 | 1,03 | up   |
| 5855195 | 7209367 | 1397547 | ventricular zone expressed PH domain homolog 1 (zebrafish) | Veph1 | 361954 | 1,22 | up   |
| 5988986 | 7209367 | 1397550 | ventricular zone expressed PH domain homolog 1 (zebrafish) | Veph1 | 361954 | 1,12 | down |
| 6162544 | 7209367 | 1397539 | ventricular zone expressed PH domain homolog 1 (zebrafish) | Veph1 | 361954 | 1,06 | down |
| 6258584 | 7209367 | 1397542 | ventricular zone expressed PH domain homolog 1 (zebrafish) | Veph1 | 361954 | 1,36 | up   |
| 6270144 | 7209367 | 1397548 | ventricular zone expressed PH domain homolog 1 (zebrafish) | Veph1 | 361954 | 1,08 | down |

|         |         |         |                                                                                  |       |        |      |      |
|---------|---------|---------|----------------------------------------------------------------------------------|-------|--------|------|------|
| 6305189 | 7209367 | 1397541 | ventricular zone expressed PH domain homolog 1 (zebrafish)                       | Veph1 | 361954 | 2,16 | down |
| 6325770 | 7209367 | 1397545 | ventricular zone expressed PH domain homolog 1 (zebrafish)                       | Veph1 | 361954 | 1,00 | up   |
| 6387216 | 7209367 | 1397544 | ventricular zone expressed PH domain homolog 1 (zebrafish)                       | Veph1 | 361954 | 1,19 | down |
| 6408953 | 7209367 | 1397543 | ventricular zone expressed PH domain homolog 1 (zebrafish)                       | Veph1 | 361954 | 1,02 | up   |
| 6513103 | 7209367 | 1397538 | ventricular zone expressed PH domain homolog 1 (zebrafish)                       | Veph1 | 361954 | 1,68 | up   |
| 6524718 | 7209367 | 1397551 | ventricular zone expressed PH domain homolog 1 (zebrafish)                       | Veph1 | 361954 | 1,03 | up   |
| 6553932 | 7209367 | 1397545 | ventricular zone expressed PH domain homolog 1 (zebrafish)                       | Veph1 | 361954 | 1,19 | down |
| 6613151 | 7209367 | 1397541 | ventricular zone expressed PH domain homolog 1 (zebrafish)                       | Veph1 | 361954 | 1,00 | up   |
| 5852515 | 7071851 | 1060655 | v-erb-b2 erythroblastic leukemia viral oncogene homolog 2, neuro/glioblastoma de | Erbb2 | 24337  | 1,32 | up   |
| 5885164 | 7071851 | 1060642 | v-erb-b2 erythroblastic leukemia viral oncogene homolog 2, neuro/glioblastoma de | Erbb2 | 24337  | 1,19 | up   |
| 5928369 | 7071851 | 1060637 | v-erb-b2 erythroblastic leukemia viral oncogene homolog 2, neuro/glioblastoma de | Erbb2 | 24337  | 1,18 | down |
| 5943371 | 7071851 | 1060663 | v-erb-b2 erythroblastic leukemia viral oncogene homolog 2, neuro/glioblastoma de | Erbb2 | 24337  | 1,74 | down |
| 5975188 | 7071851 | 1060646 | v-erb-b2 erythroblastic leukemia viral oncogene homolog 2, neuro/glioblastoma de | Erbb2 | 24337  | 1,51 | up   |
| 5976896 | 7071851 | 1060653 | v-erb-b2 erythroblastic leukemia viral oncogene homolog 2, neuro/glioblastoma de | Erbb2 | 24337  | 1,04 | up   |
| 5977414 | 7071851 | 1060654 | v-erb-b2 erythroblastic leukemia viral oncogene homolog 2, neuro/glioblastoma de | Erbb2 | 24337  | 1,61 | down |
| 5991102 | 7071851 | 1060659 | v-erb-b2 erythroblastic leukemia viral oncogene homolog 2, neuro/glioblastoma de | Erbb2 | 24337  | 1,03 | down |
| 5991736 | 7071851 | 1060650 | v-erb-b2 erythroblastic leukemia viral oncogene homolog 2, neuro/glioblastoma de | Erbb2 | 24337  | 1,12 | down |
| 6008301 | 7071851 | 1060663 | v-erb-b2 erythroblastic leukemia viral oncogene homolog 2, neuro/glioblastoma de | Erbb2 | 24337  | 1,16 | down |
| 6039346 | 7071851 | 1060645 | v-erb-b2 erythroblastic leukemia viral oncogene homolog 2, neuro/glioblastoma de | Erbb2 | 24337  | 1,14 | up   |
| 6084120 | 7071851 | 1060641 | v-erb-b2 erythroblastic leukemia viral oncogene homolog 2, neuro/glioblastoma de | Erbb2 | 24337  | 1,05 | down |
| 6097011 | 7071851 | 1060644 | v-erb-b2 erythroblastic leukemia viral oncogene homolog 2, neuro/glioblastoma de | Erbb2 | 24337  | 1,27 | down |
| 6111168 | 7071851 | 1060659 | v-erb-b2 erythroblastic leukemia viral oncogene homolog 2, neuro/glioblastoma de | Erbb2 | 24337  | 1,37 | up   |
| 6123359 | 7071851 | 1060663 | v-erb-b2 erythroblastic leukemia viral oncogene homolog 2, neuro/glioblastoma de | Erbb2 | 24337  | 1,04 | up   |
| 6146088 | 7071851 | 1060643 | v-erb-b2 erythroblastic leukemia viral oncogene homolog 2, neuro/glioblastoma de | Erbb2 | 24337  | 1,46 | down |
| 6190314 | 7071851 | 1060647 | v-erb-b2 erythroblastic leukemia viral oncogene homolog 2, neuro/glioblastoma de | Erbb2 | 24337  | 1,22 | up   |
| 6201018 | 7071851 | 1060657 | v-erb-b2 erythroblastic leukemia viral oncogene homolog 2, neuro/glioblastoma de | Erbb2 | 24337  | 1,00 | down |
| 6222861 | 7071851 | 1060636 | v-erb-b2 erythroblastic leukemia viral oncogene homolog 2, neuro/glioblastoma de | Erbb2 | 24337  | 1,29 | down |
| 6293492 | 7071851 | 1060648 | v-erb-b2 erythroblastic leukemia viral oncogene homolog 2, neuro/glioblastoma de | Erbb2 | 24337  | 1,13 | down |
| 6319392 | 7071851 | 1060638 | v-erb-b2 erythroblastic leukemia viral oncogene homolog 2, neuro/glioblastoma de | Erbb2 | 24337  | 1,44 | up   |
| 6338695 | 7071851 | 1060660 | v-erb-b2 erythroblastic leukemia viral oncogene homolog 2, neuro/glioblastoma de | Erbb2 | 24337  | 1,31 | down |
| 6383141 | 7071851 | 1060661 | v-erb-b2 erythroblastic leukemia viral oncogene homolog 2, neuro/glioblastoma de | Erbb2 | 24337  | 2,13 | up   |
| 6401124 | 7071851 | 1060652 | v-erb-b2 erythroblastic leukemia viral oncogene homolog 2, neuro/glioblastoma de | Erbb2 | 24337  | 1,29 | up   |
| 6447237 | 7071851 | 1060656 | v-erb-b2 erythroblastic leukemia viral oncogene homolog 2, neuro/glioblastoma de | Erbb2 | 24337  | 1,05 | up   |
| 6472320 | 7071851 | 1060658 | v-erb-b2 erythroblastic leukemia viral oncogene homolog 2, neuro/glioblastoma de | Erbb2 | 24337  | 1,16 | down |
| 6500249 | 7071851 | 1060649 | v-erb-b2 erythroblastic leukemia viral oncogene homolog 2, neuro/glioblastoma de | Erbb2 | 24337  | 1,26 | down |
| 6536401 | 7071851 | 1060651 | v-erb-b2 erythroblastic leukemia viral oncogene homolog 2, neuro/glioblastoma de | Erbb2 | 24337  | 1,03 | down |
| 6557171 | 7071851 | 1060662 | v-erb-b2 erythroblastic leukemia viral oncogene homolog 2, neuro/glioblastoma de | Erbb2 | 24337  | 1,43 | down |
| 6582850 | 7071851 | 1060640 | v-erb-b2 erythroblastic leukemia viral oncogene homolog 2, neuro/glioblastoma de | Erbb2 | 24337  | 1,19 | up   |
| 6593037 | 7071851 | 1060639 | v-erb-b2 erythroblastic leukemia viral oncogene homolog 2, neuro/glioblastoma de | Erbb2 | 24337  | 1,56 | up   |
| 6637723 | 7071851 | 1060661 | v-erb-b2 erythroblastic leukemia viral oncogene homolog 2, neuro/glioblastoma de | Erbb2 | 24337  | 1,02 | up   |
| 5631233 | 7321394 | 1675597 | v-erb-b2 erythroblastic leukemia viral oncogene homolog 3 (avian)                | Erbb3 | 29496  | 1,15 | down |
| 5646436 | 7321394 | 1675583 | v-erb-b2 erythroblastic leukemia viral oncogene homolog 3 (avian)                | Erbb3 | 29496  | 1,04 | down |
| 5705649 | 7321394 | 1675576 | v-erb-b2 erythroblastic leukemia viral oncogene homolog 3 (avian)                | Erbb3 | 29496  | 2,55 | up   |
| 5755658 | 7321394 | 1675572 | v-erb-b2 erythroblastic leukemia viral oncogene homolog 3 (avian)                | Erbb3 | 29496  | 1,16 | down |
| 5785789 | 7321394 | 1675589 | v-erb-b2 erythroblastic leukemia viral oncogene homolog 3 (avian)                | Erbb3 | 29496  | 1,04 | down |
| 5804980 | 7321394 | 1675592 | v-erb-b2 erythroblastic leukemia viral oncogene homolog 3 (avian)                | Erbb3 | 29496  | 1,18 | up   |
| 5824991 | 7321394 | 1675572 | v-erb-b2 erythroblastic leukemia viral oncogene homolog 3 (avian)                | Erbb3 | 29496  | 1,03 | up   |
| 5925004 | 7321394 | 1675573 | v-erb-b2 erythroblastic leukemia viral oncogene homolog 3 (avian)                | Erbb3 | 29496  | 1,83 | up   |
| 6053398 | 7321394 | 1675581 | v-erb-b2 erythroblastic leukemia viral oncogene homolog 3 (avian)                | Erbb3 | 29496  | 1,27 | down |
| 6076920 | 7321394 | 1675587 | v-erb-b2 erythroblastic leukemia viral oncogene homolog 3 (avian)                | Erbb3 | 29496  | 1,43 | down |
| 6089042 | 7321394 | 1675575 | v-erb-b2 erythroblastic leukemia viral oncogene homolog 3 (avian)                | Erbb3 | 29496  | 1,01 | up   |
| 6127166 | 7321394 | 1675584 | v-erb-b2 erythroblastic leukemia viral oncogene homolog 3 (avian)                | Erbb3 | 29496  | 1,03 | down |
| 6141159 | 7321394 | 1675571 | v-erb-b2 erythroblastic leukemia viral oncogene homolog 3 (avian)                | Erbb3 | 29496  | 1,00 | up   |
| 6142682 | 7321394 | 1675590 | v-erb-b2 erythroblastic leukemia viral oncogene homolog 3 (avian)                | Erbb3 | 29496  | 1,44 | up   |
| 6179139 | 7321394 | 1675577 | v-erb-b2 erythroblastic leukemia viral oncogene homolog 3 (avian)                | Erbb3 | 29496  | 1,04 | down |
| 6188701 | 7321394 | 1675586 | v-erb-b2 erythroblastic leukemia viral oncogene homolog 3 (avian)                | Erbb3 | 29496  | 1,04 | down |

|         |         |         |                                                                    |       |        |      |      |
|---------|---------|---------|--------------------------------------------------------------------|-------|--------|------|------|
| 6196002 | 7321394 | 1675574 | v-erb-b2 erythroblastic leukemia viral oncogene homolog 3 (avian)  | Erbb3 | 29496  | 1,63 | down |
| 6205913 | 7321394 | 1675591 | v-erb-b2 erythroblastic leukemia viral oncogene homolog 3 (avian)  | Erbb3 | 29496  | 1,00 | up   |
| 6209899 | 7321394 | 1675582 | v-erb-b2 erythroblastic leukemia viral oncogene homolog 3 (avian)  | Erbb3 | 29496  | 1,23 | up   |
| 6212671 | 7321394 | 1675580 | v-erb-b2 erythroblastic leukemia viral oncogene homolog 3 (avian)  | Erbb3 | 29496  | 1,01 | up   |
| 6253605 | 7321394 | 1675585 | v-erb-b2 erythroblastic leukemia viral oncogene homolog 3 (avian)  | Erbb3 | 29496  | 1,45 | up   |
| 6261969 | 7321394 | 1675574 | v-erb-b2 erythroblastic leukemia viral oncogene homolog 3 (avian)  | Erbb3 | 29496  | 1,10 | up   |
| 6265945 | 7321394 | 1675595 | v-erb-b2 erythroblastic leukemia viral oncogene homolog 3 (avian)  | Erbb3 | 29496  | 1,27 | down |
| 6328355 | 7321394 | 1675578 | v-erb-b2 erythroblastic leukemia viral oncogene homolog 3 (avian)  | Erbb3 | 29496  | 1,06 | down |
| 6356033 | 7321394 | 1675579 | v-erb-b2 erythroblastic leukemia viral oncogene homolog 3 (avian)  | Erbb3 | 29496  | 1,27 | down |
| 6410262 | 7321394 | 1675598 | v-erb-b2 erythroblastic leukemia viral oncogene homolog 3 (avian)  | Erbb3 | 29496  | 1,08 | down |
| 6473445 | 7321394 | 1675596 | v-erb-b2 erythroblastic leukemia viral oncogene homolog 3 (avian)  | Erbb3 | 29496  | 1,39 | up   |
| 6506640 | 7321394 | 1675571 | v-erb-b2 erythroblastic leukemia viral oncogene homolog 3 (avian)  | Erbb3 | 29496  | 1,01 | up   |
| 6526764 | 7321394 | 1675572 | v-erb-b2 erythroblastic leukemia viral oncogene homolog 3 (avian)  | Erbb3 | 29496  | 1,52 | down |
| 6583254 | 7321394 | 1675588 | v-erb-b2 erythroblastic leukemia viral oncogene homolog 3 (avian)  | Erbb3 | 29496  | 1,10 | down |
| 6699479 | 7321394 | 1675594 | v-erb-b2 erythroblastic leukemia viral oncogene homolog 3 (avian)  | Erbb3 | 29496  | 1,68 | up   |
| 6723896 | 7321394 | 1675593 | v-erb-b2 erythroblastic leukemia viral oncogene homolog 3 (avian)  | Erbb3 | 29496  | 1,15 | down |
| 6733394 | 7321394 | 1675591 | v-erb-b2 erythroblastic leukemia viral oncogene homolog 3 (avian)  | Erbb3 | 29496  | 1,18 | down |
| 5718249 | 7107066 | 1144779 | vesicle-associated membrane protein 4                              | Vamp4 | 364033 | 1,14 | down |
| 5775797 | 7107066 | 1144786 | vesicle-associated membrane protein 4                              | Vamp4 | 364033 | 1,18 | up   |
| 5976262 | 7107066 | 1144780 | vesicle-associated membrane protein 4                              | Vamp4 | 364033 | 1,30 | down |
| 6016978 | 7107066 | 1144774 | vesicle-associated membrane protein 4                              | Vamp4 | 364033 | 1,53 | up   |
| 6125947 | 7107066 | 1144782 | vesicle-associated membrane protein 4                              | Vamp4 | 364033 | 1,06 | up   |
| 6282768 | 7107066 | 1144786 | vesicle-associated membrane protein 4                              | Vamp4 | 364033 | 1,00 | down |
| 6421935 | 7107066 | 1144776 | vesicle-associated membrane protein 4                              | Vamp4 | 364033 | 1,01 | up   |
| 6474579 | 7107066 | 1144775 | vesicle-associated membrane protein 4                              | Vamp4 | 364033 | 1,10 | up   |
| 6534843 | 7107066 | 1144785 | vesicle-associated membrane protein 4                              | Vamp4 | 364033 | 1,46 | up   |
| 6713338 | 7107066 | 1144781 | vesicle-associated membrane protein 4                              | Vamp4 | 364033 | 1,00 | up   |
| 6228493 | 7367959 | 1789071 | vimentin-type intermediate filament associated coiled-coil protein | Vmac  | 363327 | 1,69 | up   |
| 6263966 | 7367959 | 1789073 | vimentin-type intermediate filament associated coiled-coil protein | Vmac  | 363327 | 1,16 | down |
| 5632276 | 7136062 | 1216285 | vinculin                                                           | Vcl   | 305679 | 1,15 | up   |
| 5672878 | 7136062 | 1216273 | vinculin                                                           | Vcl   | 305679 | 1,09 | up   |
| 5697152 | 7136062 | 1216286 | vinculin                                                           | Vcl   | 305679 | 1,08 | up   |
| 5701685 | 7136062 | 1216277 | vinculin                                                           | Vcl   | 305679 | 1,98 | down |
| 5702190 | 7136062 | 1216274 | vinculin                                                           | Vcl   | 305679 | 1,33 | down |
| 5760786 | 7136062 | 1216296 | vinculin                                                           | Vcl   | 305679 | 1,05 | up   |
| 5785094 | 7136062 | 1216279 | vinculin                                                           | Vcl   | 305679 | 1,00 | up   |
| 5841484 | 7136062 | 1216300 | vinculin                                                           | Vcl   | 305679 | 1,31 | down |
| 5880899 | 7136062 | 1216281 | vinculin                                                           | Vcl   | 305679 | 1,05 | down |
| 6178330 | 7136062 | 1216298 | vinculin                                                           | Vcl   | 305679 | 1,01 | down |
| 6200218 | 7136062 | 1216272 | vinculin                                                           | Vcl   | 305679 | 1,11 | up   |
| 6237861 | 7136062 | 1216284 | vinculin                                                           | Vcl   | 305679 | 1,17 | down |
| 6242791 | 7136062 | 1216278 | vinculin                                                           | Vcl   | 305679 | 1,12 | down |
| 6273710 | 7136062 | 1216288 | vinculin                                                           | Vcl   | 305679 | 1,30 | down |
| 6291460 | 7136062 | 1216275 | vinculin                                                           | Vcl   | 305679 | 1,15 | down |
| 6323545 | 7136062 | 1216305 | vinculin                                                           | Vcl   | 305679 | 1,50 | up   |
| 6407135 | 7136062 | 1216277 | vinculin                                                           | Vcl   | 305679 | 1,17 | up   |
| 6426766 | 7136062 | 1216297 | vinculin                                                           | Vcl   | 305679 | 1,28 | up   |
| 6499302 | 7136062 | 1216272 | vinculin                                                           | Vcl   | 305679 | 1,61 | up   |
| 6544790 | 7136062 | 1216282 | vinculin                                                           | Vcl   | 305679 | 1,00 | down |
| 6569537 | 7136062 | 1216295 | vinculin                                                           | Vcl   | 305679 | 1,15 | down |
| 6569797 | 7136062 | 1216289 | vinculin                                                           | Vcl   | 305679 | 1,16 | up   |
| 6681930 | 7136062 | 1216280 | vinculin                                                           | Vcl   | 305679 | 1,08 | down |
| 6722047 | 7136062 | 1216287 | vinculin                                                           | Vcl   | 305679 | 1,16 | up   |
| 6722277 | 7136062 | 1216298 | vinculin                                                           | Vcl   | 305679 | 1,21 | up   |
| 6725921 | 7136062 | 1216272 | vinculin                                                           | Vcl   | 305679 | 2,45 | down |
| 5833235 | 7294151 | 1606586 | vitrin                                                             | Vit   | 313831 | 1,08 | down |

|         |         |         |                                                      |        |        |      |      |
|---------|---------|---------|------------------------------------------------------|--------|--------|------|------|
| 5956322 | 7294151 | 1606592 | vitrin                                               | Vit    | 313831 | 2,02 | down |
| 6373009 | 7294151 | 1606636 | vitrin                                               | Vit    | 313831 | 1,51 | down |
| 6484406 | 7294151 | 1606586 | vitrin                                               | Vit    | 313831 | 1,02 | up   |
| 6533452 | 7294151 | 1606586 | vitrin                                               | Vit    | 313831 | 1,91 | up   |
| 6257879 | 7271135 | 1550342 | v-Ki-ras2 Kirsten rat sarcoma viral oncogene homolog | Kras   | 24525  | 1,03 | down |
| 6388622 | 7271135 | 1550340 | v-Ki-ras2 Kirsten rat sarcoma viral oncogene homolog | Kras   | 24525  | 1,25 | down |
| 6522947 | 7271135 | 1550343 | v-Ki-ras2 Kirsten rat sarcoma viral oncogene homolog | Kras   | 24525  | 2,11 | up   |
| 6625752 | 7271135 | 1550341 | v-Ki-ras2 Kirsten rat sarcoma viral oncogene homolog | Kras   | 24525  | 1,07 | down |
| 5925141 | 7257439 | 1516285 | von Hippel-Lindau tumor suppressor                   | Vhl    | 24874  | 1,30 | up   |
| 5947369 | 7257439 | 1516285 | von Hippel-Lindau tumor suppressor                   | Vhl    | 24874  | 2,59 | down |
| 5967964 | 7257439 | 1516287 | von Hippel-Lindau tumor suppressor                   | Vhl    | 24874  | 1,08 | up   |
| 6223944 | 7257439 | 1516286 | von Hippel-Lindau tumor suppressor                   | Vhl    | 24874  | 1,28 | up   |
| 6228116 | 7257439 | 1516285 | von Hippel-Lindau tumor suppressor                   | Vhl    | 24874  | 1,11 | up   |
| 6228879 | 7257439 | 1516287 | von Hippel-Lindau tumor suppressor                   | Vhl    | 24874  | 1,07 | up   |
| 6337804 | 7257439 | 1516288 | von Hippel-Lindau tumor suppressor                   | Vhl    | 24874  | 1,08 | down |
| 6512455 | 7257439 | 1516285 | von Hippel-Lindau tumor suppressor                   | Vhl    | 24874  | 2,27 | down |
| 5687369 | 7334980 | 1707157 | von Willebrand factor A domain containing 5A         | Vwa5a  | 301097 | 1,05 | down |
| 5711445 | 7334980 | 1707165 | von Willebrand factor A domain containing 5A         | Vwa5a  | 301097 | 1,21 | up   |
| 5733294 | 7334980 | 1707166 | von Willebrand factor A domain containing 5A         | Vwa5a  | 301097 | 1,04 | up   |
| 5763232 | 7334980 | 1707163 | von Willebrand factor A domain containing 5A         | Vwa5a  | 301097 | 1,23 | up   |
| 5784076 | 7334980 | 1707160 | von Willebrand factor A domain containing 5A         | Vwa5a  | 301097 | 1,06 | up   |
| 5791549 | 7334980 | 1707155 | von Willebrand factor A domain containing 5A         | Vwa5a  | 301097 | 1,16 | up   |
| 5854962 | 7334980 | 1707158 | von Willebrand factor A domain containing 5A         | Vwa5a  | 301097 | 1,34 | down |
| 5861458 | 7334980 | 1707168 | von Willebrand factor A domain containing 5A         | Vwa5a  | 301097 | 7,99 | down |
| 5897716 | 7334980 | 1707166 | von Willebrand factor A domain containing 5A         | Vwa5a  | 301097 | 2,14 | down |
| 5905300 | 7334980 | 1707151 | von Willebrand factor A domain containing 5A         | Vwa5a  | 301097 | 1,35 | down |
| 5939209 | 7334980 | 1707161 | von Willebrand factor A domain containing 5A         | Vwa5a  | 301097 | 2,37 | down |
| 6084334 | 7334980 | 1707167 | von Willebrand factor A domain containing 5A         | Vwa5a  | 301097 | 9,22 | down |
| 6084946 | 7334980 | 1707162 | von Willebrand factor A domain containing 5A         | Vwa5a  | 301097 | 1,28 | up   |
| 6318659 | 7334980 | 1707154 | von Willebrand factor A domain containing 5A         | Vwa5a  | 301097 | 1,28 | up   |
| 6432831 | 7334980 | 1707164 | von Willebrand factor A domain containing 5A         | Vwa5a  | 301097 | 1,07 | up   |
| 6457562 | 7334980 | 1707150 | von Willebrand factor A domain containing 5A         | Vwa5a  | 301097 | 1,16 | down |
| 6459146 | 7334980 | 1707166 | von Willebrand factor A domain containing 5A         | Vwa5a  | 301097 | 1,04 | up   |
| 6544400 | 7334980 | 1707153 | von Willebrand factor A domain containing 5A         | Vwa5a  | 301097 | 1,08 | up   |
| 6567289 | 7334980 | 1707166 | von Willebrand factor A domain containing 5A         | Vwa5a  | 301097 | 1,76 | down |
| 6581747 | 7334980 | 1707159 | von Willebrand factor A domain containing 5A         | Vwa5a  | 301097 | 1,05 | up   |
| 6598585 | 7334980 | 1707156 | von Willebrand factor A domain containing 5A         | Vwa5a  | 301097 | 1,16 | up   |
| 6620053 | 7334980 | 1707152 | von Willebrand factor A domain containing 5A         | Vwa5a  | 301097 | 1,30 | up   |
| 5641893 | 7292364 | 1602105 | von Willebrand factor A domain containing 5B1        | Vwa5b1 | 313653 | 1,05 | up   |
| 5774123 | 7292364 | 1602109 | von Willebrand factor A domain containing 5B1        | Vwa5b1 | 313653 | 1,27 | down |
| 5810506 | 7292364 | 1602112 | von Willebrand factor A domain containing 5B1        | Vwa5b1 | 313653 | 1,15 | down |
| 5863298 | 7292364 | 1602101 | von Willebrand factor A domain containing 5B1        | Vwa5b1 | 313653 | 1,64 | down |
| 5961930 | 7292364 | 1602108 | von Willebrand factor A domain containing 5B1        | Vwa5b1 | 313653 | 1,15 | down |
| 5992660 | 7292364 | 1602100 | von Willebrand factor A domain containing 5B1        | Vwa5b1 | 313653 | 1,64 | up   |
| 6018646 | 7292364 | 1602123 | von Willebrand factor A domain containing 5B1        | Vwa5b1 | 313653 | 1,19 | down |
| 6024716 | 7292364 | 1602115 | von Willebrand factor A domain containing 5B1        | Vwa5b1 | 313653 | 1,67 | down |
| 6138866 | 7292364 | 1602102 | von Willebrand factor A domain containing 5B1        | Vwa5b1 | 313653 | 1,12 | up   |
| 6145203 | 7292364 | 1602106 | von Willebrand factor A domain containing 5B1        | Vwa5b1 | 313653 | 1,29 | up   |
| 6158038 | 7292364 | 1602113 | von Willebrand factor A domain containing 5B1        | Vwa5b1 | 313653 | 1,10 | up   |
| 6199589 | 7292364 | 1602111 | von Willebrand factor A domain containing 5B1        | Vwa5b1 | 313653 | 1,08 | down |
| 6208208 | 7292364 | 1602117 | von Willebrand factor A domain containing 5B1        | Vwa5b1 | 313653 | 1,22 | down |
| 6217882 | 7292364 | 1602126 | von Willebrand factor A domain containing 5B1        | Vwa5b1 | 313653 | 1,26 | up   |
| 6256111 | 7292364 | 1602125 | von Willebrand factor A domain containing 5B1        | Vwa5b1 | 313653 | 1,37 | down |
| 6388776 | 7292364 | 1602122 | von Willebrand factor A domain containing 5B1        | Vwa5b1 | 313653 | 1,05 | down |
| 6441040 | 7292364 | 1602114 | von Willebrand factor A domain containing 5B1        | Vwa5b1 | 313653 | 2,00 | down |
| 6447694 | 7292364 | 1602103 | von Willebrand factor A domain containing 5B1        | Vwa5b1 | 313653 | 1,15 | up   |

|         |         |         |                                                   |        |        |      |      |
|---------|---------|---------|---------------------------------------------------|--------|--------|------|------|
| 6463413 | 7292364 | 1602120 | von Willebrand factor A domain containing 5B1     | Vwa5b1 | 313653 | 1,17 | down |
| 6482714 | 7292364 | 1602108 | von Willebrand factor A domain containing 5B1     | Vwa5b1 | 313653 | 1,89 | down |
| 6547033 | 7292364 | 1602125 | von Willebrand factor A domain containing 5B1     | Vwa5b1 | 313653 | 1,21 | up   |
| 6604337 | 7292364 | 1602121 | von Willebrand factor A domain containing 5B1     | Vwa5b1 | 313653 | 1,28 | down |
| 6692777 | 7292364 | 1602123 | von Willebrand factor A domain containing 5B1     | Vwa5b1 | 313653 | 1,99 | down |
| 6694590 | 7292364 | 1602130 | von Willebrand factor A domain containing 5B1     | Vwa5b1 | 313653 | 1,06 | up   |
| 6745706 | 7292364 | 1602107 | von Willebrand factor A domain containing 5B1     | Vwa5b1 | 313653 | 1,77 | down |
| 5619744 | 7033541 | 969980  | WAS protein homology region 2 domain containing 1 | Whdc1  | 293057 | 1,13 | up   |
| 5628136 | 7033541 | 969975  | WAS protein homology region 2 domain containing 1 | Whdc1  | 293057 | 1,57 | down |
| 5639112 | 7033541 | 969983  | WAS protein homology region 2 domain containing 1 | Whdc1  | 293057 | 1,01 | down |
| 5714076 | 7033541 | 969987  | WAS protein homology region 2 domain containing 1 | Whdc1  | 293057 | 1,24 | up   |
| 5723481 | 7033541 | 969986  | WAS protein homology region 2 domain containing 1 | Whdc1  | 293057 | 2,01 | down |
| 5776208 | 7033541 | 969985  | WAS protein homology region 2 domain containing 1 | Whdc1  | 293057 | 1,12 | up   |
| 5843076 | 7033541 | 969975  | WAS protein homology region 2 domain containing 1 | Whdc1  | 293057 | 1,89 | down |
| 5868154 | 7033541 | 969974  | WAS protein homology region 2 domain containing 1 | Whdc1  | 293057 | 1,54 | down |
| 5884136 | 7033541 | 969978  | WAS protein homology region 2 domain containing 1 | Whdc1  | 293057 | 1,04 | down |
| 5899073 | 7033541 | 969985  | WAS protein homology region 2 domain containing 1 | Whdc1  | 293057 | 1,27 | up   |
| 6033171 | 7033541 | 969986  | WAS protein homology region 2 domain containing 1 | Whdc1  | 293057 | 1,09 | up   |
| 6063848 | 7033541 | 969974  | WAS protein homology region 2 domain containing 1 | Whdc1  | 293057 | 1,54 | down |
| 6100171 | 7033541 | 969980  | WAS protein homology region 2 domain containing 1 | Whdc1  | 293057 | 1,11 | up   |
| 6111102 | 7033541 | 969981  | WAS protein homology region 2 domain containing 1 | Whdc1  | 293057 | 1,03 | up   |
| 6126236 | 7033541 | 969974  | WAS protein homology region 2 domain containing 1 | Whdc1  | 293057 | 1,33 | down |
| 6281623 | 7033541 | 969984  | WAS protein homology region 2 domain containing 1 | Whdc1  | 293057 | 1,13 | up   |
| 6443472 | 7033541 | 969985  | WAS protein homology region 2 domain containing 1 | Whdc1  | 293057 | 1,18 | down |
| 6514931 | 7033541 | 969986  | WAS protein homology region 2 domain containing 1 | Whdc1  | 293057 | 1,20 | up   |
| 6673055 | 7033541 | 969982  | WAS protein homology region 2 domain containing 1 | Whdc1  | 293057 | 1,26 | down |
| 6688054 | 7033541 | 969976  | WAS protein homology region 2 domain containing 1 | Whdc1  | 293057 | 1,57 | up   |
| 6723202 | 7033541 | 969979  | WAS protein homology region 2 domain containing 1 | Whdc1  | 293057 | 1,38 | up   |
| 6657158 | 7071969 | 1060902 | WAS/WASL interacting protein family, member 2     | Wipf2  | 360620 | 1,39 | up   |
| 5700721 | 7362759 | 1776134 | WD repeat domain 12                               | Wdr12  | 363237 | 1,02 | down |
| 5818528 | 7362759 | 1776140 | WD repeat domain 12                               | Wdr12  | 363237 | 1,18 | up   |
| 5819096 | 7362759 | 1776133 | WD repeat domain 12                               | Wdr12  | 363237 | 1,01 | down |
| 5845712 | 7362759 | 1776139 | WD repeat domain 12                               | Wdr12  | 363237 | 1,30 | up   |
| 6039606 | 7362759 | 1776132 | WD repeat domain 12                               | Wdr12  | 363237 | 1,86 | down |
| 6132439 | 7362759 | 1776142 | WD repeat domain 12                               | Wdr12  | 363237 | 1,97 | up   |
| 6292082 | 7362759 | 1776138 | WD repeat domain 12                               | Wdr12  | 363237 | 1,61 | up   |
| 6292311 | 7362759 | 1776143 | WD repeat domain 12                               | Wdr12  | 363237 | 3,43 | up   |
| 6329090 | 7362759 | 1776137 | WD repeat domain 12                               | Wdr12  | 363237 | 1,29 | down |
| 6366719 | 7362759 | 1776141 | WD repeat domain 12                               | Wdr12  | 363237 | 1,25 | up   |
| 6630967 | 7362759 | 1776134 | WD repeat domain 12                               | Wdr12  | 363237 | 1,34 | down |
| 6657652 | 7362759 | 1776144 | WD repeat domain 12                               | Wdr12  | 363237 | 1,01 | down |
| 6694907 | 7362759 | 1776136 | WD repeat domain 12                               | Wdr12  | 363237 | 1,33 | up   |
| 6703643 | 7362759 | 1776135 | WD repeat domain 12                               | Wdr12  | 363237 | 1,12 | up   |
| 5653656 | 7322388 | 1677328 | WD repeat domain 18                               | Wdr18  | 314617 | 1,11 | down |
| 5852798 | 7322388 | 1677328 | WD repeat domain 18                               | Wdr18  | 314617 | 2,01 | up   |
| 5938187 | 7322388 | 1677324 | WD repeat domain 18                               | Wdr18  | 314617 | 1,02 | down |
| 6027490 | 7322388 | 1677323 | WD repeat domain 18                               | Wdr18  | 314617 | 1,01 | up   |
| 6058760 | 7322388 | 1677320 | WD repeat domain 18                               | Wdr18  | 314617 | 1,17 | down |
| 6172010 | 7322388 | 1677326 | WD repeat domain 18                               | Wdr18  | 314617 | 1,14 | down |
| 6481630 | 7322388 | 1677327 | WD repeat domain 18                               | Wdr18  | 314617 | 1,24 | up   |
| 6697997 | 7322388 | 1677321 | WD repeat domain 18                               | Wdr18  | 314617 | 1,14 | down |
| 6721550 | 7322388 | 1677322 | WD repeat domain 18                               | Wdr18  | 314617 | 1,78 | up   |
| 5627612 | 7296131 | 1611501 | WD repeat domain 35-like                          | Wdr35l | 503018 | 1,03 | down |
| 5696075 | 7296131 | 1611480 | WD repeat domain 35-like                          | Wdr35l | 503018 | 1,47 | down |
| 5731982 | 7296131 | 1611503 | WD repeat domain 35-like                          | Wdr35l | 503018 | 1,57 | down |
| 5795291 | 7296131 | 1611500 | WD repeat domain 35-like                          | Wdr35l | 503018 | 1,13 | up   |

|         |         |         |                          |        |        |      |      |
|---------|---------|---------|--------------------------|--------|--------|------|------|
| 5813251 | 7296131 | 1611494 | WD repeat domain 35-like | Wdr351 | 503018 | 1,32 | down |
| 5850699 | 7296131 | 1611483 | WD repeat domain 35-like | Wdr351 | 503018 | 1,03 | down |
| 5901095 | 7296131 | 1611502 | WD repeat domain 35-like | Wdr351 | 503018 | 1,12 | down |
| 6139627 | 7296131 | 1611487 | WD repeat domain 35-like | Wdr351 | 503018 | 1,13 | up   |
| 6205427 | 7296131 | 1611479 | WD repeat domain 35-like | Wdr351 | 503018 | 1,14 | down |
| 6233609 | 7296131 | 1611486 | WD repeat domain 35-like | Wdr351 | 503018 | 1,09 | up   |
| 6268987 | 7296131 | 1611482 | WD repeat domain 35-like | Wdr351 | 503018 | 1,10 | down |
| 6286090 | 7296131 | 1611503 | WD repeat domain 35-like | Wdr351 | 503018 | 1,31 | down |
| 6320128 | 7296131 | 1611496 | WD repeat domain 35-like | Wdr351 | 503018 | 1,31 | up   |
| 6335771 | 7296131 | 1611490 | WD repeat domain 35-like | Wdr351 | 503018 | 2,60 | down |
| 6349462 | 7296131 | 1611499 | WD repeat domain 35-like | Wdr351 | 503018 | 1,27 | up   |
| 6356323 | 7296131 | 1611488 | WD repeat domain 35-like | Wdr351 | 503018 | 1,14 | up   |
| 6394671 | 7296131 | 1611498 | WD repeat domain 35-like | Wdr351 | 503018 | 1,33 | up   |
| 6401575 | 7296131 | 1611484 | WD repeat domain 35-like | Wdr351 | 503018 | 1,85 | up   |
| 6453736 | 7296131 | 1611493 | WD repeat domain 35-like | Wdr351 | 503018 | 1,05 | down |
| 6510885 | 7296131 | 1611497 | WD repeat domain 35-like | Wdr351 | 503018 | 1,12 | down |
| 6571040 | 7296131 | 1611485 | WD repeat domain 35-like | Wdr351 | 503018 | 1,09 | up   |
| 6672894 | 7296131 | 1611495 | WD repeat domain 35-like | Wdr351 | 503018 | 1,02 | down |
| 5636707 | 7341394 | 1723616 | WD repeat domain 48      | Wdr48  | 363164 | 1,54 | up   |
| 5704354 | 7341394 | 1723612 | WD repeat domain 48      | Wdr48  | 363164 | 1,02 | up   |
| 5709978 | 7341394 | 1723611 | WD repeat domain 48      | Wdr48  | 363164 | 1,21 | down |
| 5769572 | 7341394 | 1723609 | WD repeat domain 48      | Wdr48  | 363164 | 1,27 | down |
| 5772544 | 7341394 | 1723599 | WD repeat domain 48      | Wdr48  | 363164 | 1,14 | up   |
| 5933568 | 7341394 | 1723614 | WD repeat domain 48      | Wdr48  | 363164 | 1,07 | down |
| 6010461 | 7341394 | 1723600 | WD repeat domain 48      | Wdr48  | 363164 | 1,19 | down |
| 6029536 | 7341394 | 1723602 | WD repeat domain 48      | Wdr48  | 363164 | 1,25 | up   |
| 6088656 | 7341394 | 1723616 | WD repeat domain 48      | Wdr48  | 363164 | 3,55 | down |
| 6107318 | 7341394 | 1723598 | WD repeat domain 48      | Wdr48  | 363164 | 1,41 | down |
| 6145730 | 7341394 | 1723615 | WD repeat domain 48      | Wdr48  | 363164 | 1,09 | up   |
| 6279371 | 7341394 | 1723606 | WD repeat domain 48      | Wdr48  | 363164 | 1,41 | up   |
| 6354077 | 7341394 | 1723607 | WD repeat domain 48      | Wdr48  | 363164 | 1,02 | down |
| 6368322 | 7341394 | 1723593 | WD repeat domain 48      | Wdr48  | 363164 | 1,08 | up   |
| 6391836 | 7341394 | 1723615 | WD repeat domain 48      | Wdr48  | 363164 | 1,63 | down |
| 6402873 | 7341394 | 1723608 | WD repeat domain 48      | Wdr48  | 363164 | 1,06 | down |
| 6552101 | 7341394 | 1723597 | WD repeat domain 48      | Wdr48  | 363164 | 1,14 | up   |
| 6566949 | 7341394 | 1723610 | WD repeat domain 48      | Wdr48  | 363164 | 1,00 | down |
| 6610990 | 7341394 | 1723601 | WD repeat domain 48      | Wdr48  | 363164 | 1,31 | down |
| 6630981 | 7341394 | 1723603 | WD repeat domain 48      | Wdr48  | 363164 | 1,26 | down |
| 6662592 | 7341394 | 1723605 | WD repeat domain 48      | Wdr48  | 363164 | 1,03 | down |
| 6679746 | 7341394 | 1723618 | WD repeat domain 48      | Wdr48  | 363164 | 1,03 | down |
| 6703487 | 7341394 | 1723617 | WD repeat domain 48      | Wdr48  | 363164 | 1,28 | down |
| 5822239 | 7266532 | 1538296 | WD repeat domain 54      | Wdr54  | 500226 | 1,20 | up   |
| 5871889 | 7266532 | 1538292 | WD repeat domain 54      | Wdr54  | 500226 | 1,23 | up   |
| 5904261 | 7266532 | 1538294 | WD repeat domain 54      | Wdr54  | 500226 | 1,16 | up   |
| 6125413 | 7266532 | 1538297 | WD repeat domain 54      | Wdr54  | 500226 | 1,17 | up   |
| 6211389 | 7266532 | 1538293 | WD repeat domain 54      | Wdr54  | 500226 | 2,07 | down |
| 6231453 | 7266532 | 1538293 | WD repeat domain 54      | Wdr54  | 500226 | 1,41 | up   |
| 6394473 | 7266532 | 1538300 | WD repeat domain 54      | Wdr54  | 500226 | 1,05 | down |
| 6422092 | 7266532 | 1538301 | WD repeat domain 54      | Wdr54  | 500226 | 1,56 | down |
| 6464668 | 7266532 | 1538295 | WD repeat domain 54      | Wdr54  | 500226 | 1,02 | down |
| 6553525 | 7266532 | 1538298 | WD repeat domain 54      | Wdr54  | 500226 | 1,20 | down |
| 6596041 | 7266532 | 1538302 | WD repeat domain 54      | Wdr54  | 500226 | 1,21 | down |
| 6619515 | 7266532 | 1538302 | WD repeat domain 54      | Wdr54  | 500226 | 1,09 | up   |
| 6658279 | 7266532 | 1538291 | WD repeat domain 54      | Wdr54  | 500226 | 1,18 | down |
| 6690139 | 7266532 | 1538299 | WD repeat domain 54      | Wdr54  | 500226 | 1,39 | up   |
| 6295331 | 7350032 | 1745147 | WD repeat domain 6       | Wdr6   | 301007 | 1,21 | down |

|         |         |         |                     |       |        |      |      |
|---------|---------|---------|---------------------|-------|--------|------|------|
| 6328429 | 7350032 | 1745149 | WD repeat domain 6  | Wdr6  | 301007 | 2,50 | up   |
| 6634621 | 7350032 | 1745148 | WD repeat domain 6  | Wdr6  | 301007 | 1,03 | up   |
| 5628311 | 7311218 | 1650365 | WD repeat domain 60 | Wdr60 | 314523 | 1,23 | up   |
| 6094556 | 7311218 | 1650336 | WD repeat domain 60 | Wdr60 | 314523 | 1,08 | down |
| 6644309 | 7311218 | 1650365 | WD repeat domain 60 | Wdr60 | 314523 | 1,10 | up   |
| 5669829 | 7215394 | 1411265 | WD repeat domain 63 | Wdr63 | 292165 | 1,42 | down |
| 5732673 | 7215394 | 1411259 | WD repeat domain 63 | Wdr63 | 292165 | 1,02 | up   |
| 5797361 | 7215394 | 1411266 | WD repeat domain 63 | Wdr63 | 292165 | 1,12 | up   |
| 5845320 | 7215394 | 1411250 | WD repeat domain 63 | Wdr63 | 292165 | 1,12 | down |
| 5934249 | 7215394 | 1411263 | WD repeat domain 63 | Wdr63 | 292165 | 1,32 | up   |
| 5935358 | 7215394 | 1411253 | WD repeat domain 63 | Wdr63 | 292165 | 1,04 | up   |
| 5952063 | 7215394 | 1411270 | WD repeat domain 63 | Wdr63 | 292165 | 1,00 | up   |
| 5953597 | 7215394 | 1411255 | WD repeat domain 63 | Wdr63 | 292165 | 1,10 | down |
| 6071314 | 7215394 | 1411258 | WD repeat domain 63 | Wdr63 | 292165 | 1,27 | up   |
| 6189640 | 7215394 | 1411268 | WD repeat domain 63 | Wdr63 | 292165 | 1,02 | down |
| 6223236 | 7215394 | 1411252 | WD repeat domain 63 | Wdr63 | 292165 | 1,00 | down |
| 6271231 | 7215394 | 1411251 | WD repeat domain 63 | Wdr63 | 292165 | 1,30 | down |
| 6316982 | 7215394 | 1411250 | WD repeat domain 63 | Wdr63 | 292165 | 1,06 | down |
| 6322365 | 7215394 | 1411258 | WD repeat domain 63 | Wdr63 | 292165 | 1,03 | down |
| 6437192 | 7215394 | 1411257 | WD repeat domain 63 | Wdr63 | 292165 | 2,58 | up   |
| 6464813 | 7215394 | 1411261 | WD repeat domain 63 | Wdr63 | 292165 | 1,32 | up   |
| 6483948 | 7215394 | 1411274 | WD repeat domain 63 | Wdr63 | 292165 | 1,19 | up   |
| 6484131 | 7215394 | 1411264 | WD repeat domain 63 | Wdr63 | 292165 | 1,33 | down |
| 6518462 | 7215394 | 1411271 | WD repeat domain 63 | Wdr63 | 292165 | 1,30 | down |
| 6521339 | 7215394 | 1411272 | WD repeat domain 63 | Wdr63 | 292165 | 1,87 | down |
| 6542965 | 7215394 | 1411258 | WD repeat domain 63 | Wdr63 | 292165 | 1,00 | up   |
| 6613944 | 7215394 | 1411262 | WD repeat domain 63 | Wdr63 | 292165 | 1,30 | down |
| 6632010 | 7215394 | 1411269 | WD repeat domain 63 | Wdr63 | 292165 | 1,05 | down |
| 6656302 | 7215394 | 1411267 | WD repeat domain 63 | Wdr63 | 292165 | 1,08 | up   |
| 6683534 | 7215394 | 1411250 | WD repeat domain 63 | Wdr63 | 292165 | 1,00 | up   |
| 6722405 | 7215394 | 1411260 | WD repeat domain 63 | Wdr63 | 292165 | 1,54 | up   |
| 6734361 | 7215394 | 1411275 | WD repeat domain 63 | Wdr63 | 292165 | 1,27 | down |
| 5761100 | 7039463 | 984252  | WD repeat domain 74 | Wdr74 | 690229 | 1,12 | up   |
| 5903189 | 7039463 | 984248  | WD repeat domain 74 | Wdr74 | 690229 | 1,33 | up   |
| 5903520 | 7039463 | 984252  | WD repeat domain 74 | Wdr74 | 690229 | 1,06 | up   |
| 6005701 | 7039463 | 984251  | WD repeat domain 74 | Wdr74 | 690229 | 1,38 | up   |
| 6035198 | 7039463 | 984245  | WD repeat domain 74 | Wdr74 | 690229 | 1,19 | down |
| 6304624 | 7039463 | 984247  | WD repeat domain 74 | Wdr74 | 690229 | 1,16 | up   |
| 6312875 | 7039463 | 984254  | WD repeat domain 74 | Wdr74 | 690229 | 1,06 | down |
| 6378729 | 7039463 | 984243  | WD repeat domain 74 | Wdr74 | 690229 | 1,25 | down |
| 6388923 | 7039463 | 984249  | WD repeat domain 74 | Wdr74 | 690229 | 1,13 | up   |
| 6418282 | 7039463 | 984244  | WD repeat domain 74 | Wdr74 | 690229 | 1,35 | down |
| 6487450 | 7039463 | 984253  | WD repeat domain 74 | Wdr74 | 690229 | 1,58 | up   |
| 6708648 | 7039463 | 984254  | WD repeat domain 74 | Wdr74 | 690229 | 1,59 | down |
| 6141529 | 7231835 | 1452294 | WD repeat domain 76 | Wdr76 | 311361 | 1,38 | up   |
| 5659439 | 7289382 | 1595195 | WD repeat domain 78 | Wdr78 | 313417 | 1,11 | down |
| 5671504 | 7289382 | 1595192 | WD repeat domain 78 | Wdr78 | 313417 | 1,02 | up   |
| 5757813 | 7289382 | 1595195 | WD repeat domain 78 | Wdr78 | 313417 | 1,92 | up   |
| 5775761 | 7289382 | 1595186 | WD repeat domain 78 | Wdr78 | 313417 | 1,30 | down |
| 5875317 | 7289382 | 1595197 | WD repeat domain 78 | Wdr78 | 313417 | 1,11 | up   |
| 5877307 | 7289382 | 1595203 | WD repeat domain 78 | Wdr78 | 313417 | 1,35 | up   |
| 5956473 | 7289382 | 1595184 | WD repeat domain 78 | Wdr78 | 313417 | 1,09 | down |
| 5981440 | 7289382 | 1595207 | WD repeat domain 78 | Wdr78 | 313417 | 1,43 | down |
| 6111530 | 7289382 | 1595190 | WD repeat domain 78 | Wdr78 | 313417 | 1,01 | up   |
| 6125213 | 7289382 | 1595194 | WD repeat domain 78 | Wdr78 | 313417 | 1,03 | down |
| 6142033 | 7289382 | 1595202 | WD repeat domain 78 | Wdr78 | 313417 | 1,11 | up   |

|         |         |         |                                                        |         |        |      |      |
|---------|---------|---------|--------------------------------------------------------|---------|--------|------|------|
| 6143807 | 7289382 | 1595205 | WD repeat domain 78                                    | Wdr78   | 313417 | 1,41 | down |
| 6181539 | 7289382 | 1595208 | WD repeat domain 78                                    | Wdr78   | 313417 | 1,26 | down |
| 6319197 | 7289382 | 1595204 | WD repeat domain 78                                    | Wdr78   | 313417 | 1,28 | down |
| 6523334 | 7289382 | 1595189 | WD repeat domain 78                                    | Wdr78   | 313417 | 1,08 | up   |
| 6622956 | 7289382 | 1595203 | WD repeat domain 78                                    | Wdr78   | 313417 | 1,03 | up   |
| 6655774 | 7289382 | 1595188 | WD repeat domain 78                                    | Wdr78   | 313417 | 1,03 | down |
| 6657696 | 7289382 | 1595201 | WD repeat domain 78                                    | Wdr78   | 313417 | 1,06 | down |
| 6688619 | 7289382 | 1595191 | WD repeat domain 78                                    | Wdr78   | 313417 | 1,11 | down |
| 6695524 | 7289382 | 1595188 | WD repeat domain 78                                    | Wdr78   | 313417 | 1,59 | down |
| 6723972 | 7289382 | 1595212 | WD repeat domain 78                                    | Wdr78   | 313417 | 1,02 | up   |
| 5770539 | 7101362 | 1130820 | Williams Beuren syndrome chromosome region 27          | Wbscr27 | 688407 | 1,14 | down |
| 5862522 | 7101362 | 1130824 | Williams Beuren syndrome chromosome region 27          | Wbscr27 | 688407 | 1,05 | down |
| 5885115 | 7101362 | 1130819 | Williams Beuren syndrome chromosome region 27          | Wbscr27 | 688407 | 1,34 | down |
| 5932580 | 7101362 | 1130821 | Williams Beuren syndrome chromosome region 27          | Wbscr27 | 688407 | 1,17 | up   |
| 5950519 | 7101362 | 1130819 | Williams Beuren syndrome chromosome region 27          | Wbscr27 | 688407 | 1,06 | down |
| 6010221 | 7101362 | 1130821 | Williams Beuren syndrome chromosome region 27          | Wbscr27 | 688407 | 1,04 | down |
| 6109496 | 7101362 | 1130819 | Williams Beuren syndrome chromosome region 27          | Wbscr27 | 688407 | 1,32 | up   |
| 6351156 | 7101362 | 1130825 | Williams Beuren syndrome chromosome region 27          | Wbscr27 | 688407 | 1,53 | up   |
| 6405775 | 7101362 | 1130826 | Williams Beuren syndrome chromosome region 27          | Wbscr27 | 688407 | 1,04 | down |
| 6408193 | 7101362 | 1130818 | Williams Beuren syndrome chromosome region 27          | Wbscr27 | 688407 | 1,05 | up   |
| 6679057 | 7101362 | 1130823 | Williams Beuren syndrome chromosome region 27          | Wbscr27 | 688407 | 2,57 | up   |
| 6746432 | 7101362 | 1130821 | Williams Beuren syndrome chromosome region 27          | Wbscr27 | 688407 | 1,58 | down |
| 5755988 | 7331602 | 1699634 | wingless-type MMTV integration site family, member 10B | Wnt10b  | 315294 | 2,56 | up   |
| 5802085 | 7331602 | 1699637 | wingless-type MMTV integration site family, member 10B | Wnt10b  | 315294 | 1,41 | down |
| 5807843 | 7331602 | 1699639 | wingless-type MMTV integration site family, member 10B | Wnt10b  | 315294 | 1,29 | up   |
| 5882612 | 7331602 | 1699635 | wingless-type MMTV integration site family, member 10B | Wnt10b  | 315294 | 1,36 | up   |
| 6034032 | 7331602 | 1699640 | wingless-type MMTV integration site family, member 10B | Wnt10b  | 315294 | 1,08 | down |
| 6532690 | 7331602 | 1699640 | wingless-type MMTV integration site family, member 10B | Wnt10b  | 315294 | 1,05 | up   |
| 6580852 | 7331602 | 1699636 | wingless-type MMTV integration site family, member 10B | Wnt10b  | 315294 | 1,01 | down |
| 6604405 | 7331602 | 1699642 | wingless-type MMTV integration site family, member 10B | Wnt10b  | 315294 | 1,01 | down |
| 6704241 | 7331602 | 1699636 | wingless-type MMTV integration site family, member 10B | Wnt10b  | 315294 | 2,21 | up   |
| 5651521 | 7373657 | 1805795 | Wiskott-Aldrich syndrome homolog (human)               | Was     | 317371 | 1,43 | up   |
| 5688517 | 7373657 | 1805794 | Wiskott-Aldrich syndrome homolog (human)               | Was     | 317371 | 1,30 | down |
| 5811640 | 7373657 | 1805787 | Wiskott-Aldrich syndrome homolog (human)               | Was     | 317371 | 1,07 | down |
| 5883654 | 7373657 | 1805781 | Wiskott-Aldrich syndrome homolog (human)               | Was     | 317371 | 1,09 | down |
| 5914636 | 7373657 | 1805786 | Wiskott-Aldrich syndrome homolog (human)               | Was     | 317371 | 1,09 | up   |
| 6008761 | 7373657 | 1805791 | Wiskott-Aldrich syndrome homolog (human)               | Was     | 317371 | 1,11 | up   |
| 6055489 | 7373657 | 1805793 | Wiskott-Aldrich syndrome homolog (human)               | Was     | 317371 | 2,34 | up   |
| 6192367 | 7373657 | 1805790 | Wiskott-Aldrich syndrome homolog (human)               | Was     | 317371 | 1,06 | down |
| 6215214 | 7373657 | 1805792 | Wiskott-Aldrich syndrome homolog (human)               | Was     | 317371 | 1,46 | up   |
| 6257996 | 7373657 | 1805784 | Wiskott-Aldrich syndrome homolog (human)               | Was     | 317371 | 1,01 | down |
| 6303857 | 7373657 | 1805789 | Wiskott-Aldrich syndrome homolog (human)               | Was     | 317371 | 2,62 | up   |
| 6430742 | 7373657 | 1805782 | Wiskott-Aldrich syndrome homolog (human)               | Was     | 317371 | 1,49 | up   |
| 6470771 | 7373657 | 1805788 | Wiskott-Aldrich syndrome homolog (human)               | Was     | 317371 | 1,37 | down |
| 6568550 | 7373657 | 1805781 | Wiskott-Aldrich syndrome homolog (human)               | Was     | 317371 | 1,78 | down |
| 6587133 | 7373657 | 1805792 | Wiskott-Aldrich syndrome homolog (human)               | Was     | 317371 | 1,00 | up   |
| 6598165 | 7373657 | 1805785 | Wiskott-Aldrich syndrome homolog (human)               | Was     | 317371 | 1,04 | down |
| 6679700 | 7373657 | 1805783 | Wiskott-Aldrich syndrome homolog (human)               | Was     | 317371 | 1,01 | down |
| 5651774 | 7270558 | 1548507 | WW domain binding protein 11                           | Wbp11   | 297695 | 1,08 | down |
| 5749380 | 7270558 | 1548503 | WW domain binding protein 11                           | Wbp11   | 297695 | 1,19 | down |
| 5820373 | 7270558 | 1548501 | WW domain binding protein 11                           | Wbp11   | 297695 | 1,28 | down |
| 5866411 | 7270558 | 1548502 | WW domain binding protein 11                           | Wbp11   | 297695 | 1,11 | up   |
| 5867961 | 7270558 | 1548506 | WW domain binding protein 11                           | Wbp11   | 297695 | 1,11 | up   |
| 6002094 | 7270558 | 1548500 | WW domain binding protein 11                           | Wbp11   | 297695 | 1,13 | up   |
| 6068167 | 7270558 | 1548504 | WW domain binding protein 11                           | Wbp11   | 297695 | 1,08 | up   |
| 6106392 | 7270558 | 1548505 | WW domain binding protein 11                           | Wbp11   | 297695 | 1,20 | up   |



|         |         |         |                                                                                      |         |        |      |      |
|---------|---------|---------|--------------------------------------------------------------------------------------|---------|--------|------|------|
| 6251485 | 7270558 | 1548501 | WW domain binding protein 11                                                         | Wbp11   | 297695 | 1,10 | down |
| 6259723 | 7270558 | 1548507 | WW domain binding protein 11                                                         | Wbp11   | 297695 | 1,55 | up   |
| 6280758 | 7270558 | 1548506 | WW domain binding protein 11                                                         | Wbp11   | 297695 | 1,26 | down |
| 6317656 | 7270558 | 1548509 | WW domain binding protein 11                                                         | Wbp11   | 297695 | 1,26 | down |
| 6590082 | 7270558 | 1548508 | WW domain binding protein 11                                                         | Wbp11   | 297695 | 1,06 | up   |
| 6649592 | 7270558 | 1548510 | WW domain binding protein 11                                                         | Wbp11   | 297695 | 1,01 | up   |
| 6732275 | 7270558 | 1548510 | WW domain binding protein 11                                                         | Wbp11   | 297695 | 2,33 | down |
| 5683886 | 7112570 | 1158656 | xenotropic and polytropic retrovirus receptor 1                                      | Xpr1    | 289424 | 1,30 | down |
| 5739783 | 7112570 | 1158688 | xenotropic and polytropic retrovirus receptor 1                                      | Xpr1    | 289424 | 1,11 | up   |
| 6038830 | 7112570 | 1158657 | xenotropic and polytropic retrovirus receptor 1                                      | Xpr1    | 289424 | 1,04 | up   |
| 6629831 | 7112570 | 1158686 | xenotropic and polytropic retrovirus receptor 1                                      | Xpr1    | 289424 | 1,08 | down |
| 5750626 | 7285897 | 1586643 | xeroderma pigmentosum, complementation group A                                       | Xpa     | 298074 | 1,69 | up   |
| 6164750 | 7285897 | 1586637 | xeroderma pigmentosum, complementation group A                                       | Xpa     | 298074 | 1,00 | down |
| 6194421 | 7285897 | 1586645 | xeroderma pigmentosum, complementation group A                                       | Xpa     | 298074 | 1,16 | up   |
| 6315621 | 7285897 | 1586641 | xeroderma pigmentosum, complementation group A                                       | Xpa     | 298074 | 2,24 | down |
| 6487228 | 7285897 | 1586642 | xeroderma pigmentosum, complementation group A                                       | Xpa     | 298074 | 1,01 | up   |
| 6698211 | 7285897 | 1586646 | xeroderma pigmentosum, complementation group A                                       | Xpa     | 298074 | 1,32 | up   |
| 5930476 | 7319065 | 1669986 | X-prolyl aminopeptidase (aminopeptidase P) 3, putative                               | Xpnpep3 | 685823 | 1,30 | up   |
| 6001611 | 7319065 | 1669993 | X-prolyl aminopeptidase (aminopeptidase P) 3, putative                               | Xpnpep3 | 685823 | 1,13 | down |
| 6152460 | 7319065 | 1669995 | X-prolyl aminopeptidase (aminopeptidase P) 3, putative                               | Xpnpep3 | 685823 | 1,62 | up   |
| 6170634 | 7319065 | 1669983 | X-prolyl aminopeptidase (aminopeptidase P) 3, putative                               | Xpnpep3 | 685823 | 1,15 | down |
| 6285576 | 7319065 | 1669984 | X-prolyl aminopeptidase (aminopeptidase P) 3, putative                               | Xpnpep3 | 685823 | 1,09 | down |
| 6301811 | 7319065 | 1669975 | X-prolyl aminopeptidase (aminopeptidase P) 3, putative                               | Xpnpep3 | 685823 | 1,20 | down |
| 6493589 | 7319065 | 1669990 | X-prolyl aminopeptidase (aminopeptidase P) 3, putative                               | Xpnpep3 | 685823 | 1,04 | up   |
| 6531644 | 7319065 | 1669988 | X-prolyl aminopeptidase (aminopeptidase P) 3, putative                               | Xpnpep3 | 685823 | 1,00 | up   |
| 6537963 | 7319065 | 1669989 | X-prolyl aminopeptidase (aminopeptidase P) 3, putative                               | Xpnpep3 | 685823 | 1,01 | up   |
| 6594088 | 7319065 | 1669996 | X-prolyl aminopeptidase (aminopeptidase P) 3, putative                               | Xpnpep3 | 685823 | 1,27 | down |
| 6642044 | 7319065 | 1669992 | X-prolyl aminopeptidase (aminopeptidase P) 3, putative                               | Xpnpep3 | 685823 | 1,00 | down |
| 6678521 | 7319065 | 1669978 | X-prolyl aminopeptidase (aminopeptidase P) 3, putative                               | Xpnpep3 | 685823 | 1,01 | down |
| 6743646 | 7319065 | 1669993 | X-prolyl aminopeptidase (aminopeptidase P) 3, putative                               | Xpnpep3 | 685823 | 1,35 | down |
| 5676287 | 7034532 | 972645  | X-ray radiation resistance associated 1                                              | Xrra1   | 365313 | 1,32 | down |
| 5823874 | 7034532 | 972641  | X-ray radiation resistance associated 1                                              | Xrra1   | 365313 | 1,00 | down |
| 5892081 | 7034532 | 972644  | X-ray radiation resistance associated 1                                              | Xrra1   | 365313 | 1,02 | down |
| 6058860 | 7034532 | 972640  | X-ray radiation resistance associated 1                                              | Xrra1   | 365313 | 1,04 | up   |
| 6194542 | 7034532 | 972642  | X-ray radiation resistance associated 1                                              | Xrra1   | 365313 | 1,22 | down |
| 6224807 | 7034532 | 972645  | X-ray radiation resistance associated 1                                              | Xrra1   | 365313 | 1,21 | down |
| 6273261 | 7034532 | 972633  | X-ray radiation resistance associated 1                                              | Xrra1   | 365313 | 1,01 | down |
| 6327088 | 7034532 | 972637  | X-ray radiation resistance associated 1                                              | Xrra1   | 365313 | 1,55 | down |
| 6379053 | 7034532 | 972635  | X-ray radiation resistance associated 1                                              | Xrra1   | 365313 | 1,01 | up   |
| 6565372 | 7034532 | 972638  | X-ray radiation resistance associated 1                                              | Xrra1   | 365313 | 1,00 | down |
| 6632256 | 7034532 | 972639  | X-ray radiation resistance associated 1                                              | Xrra1   | 365313 | 1,05 | down |
| 5654609 | 7161992 | 1280151 | xylosylprotein beta1,4-galactosyltransferase, polypeptide 7 (galactosyltransferase I | B4galt7 | 364675 | 1,13 | down |
| 5756214 | 7161992 | 1280153 | xylosylprotein beta1,4-galactosyltransferase, polypeptide 7 (galactosyltransferase I | B4galt7 | 364675 | 1,27 | down |
| 5786619 | 7161992 | 1280158 | xylosylprotein beta1,4-galactosyltransferase, polypeptide 7 (galactosyltransferase I | B4galt7 | 364675 | 2,68 | up   |
| 5789975 | 7161992 | 1280152 | xylosylprotein beta1,4-galactosyltransferase, polypeptide 7 (galactosyltransferase I | B4galt7 | 364675 | 1,15 | up   |
| 6379540 | 7161992 | 1280151 | xylosylprotein beta1,4-galactosyltransferase, polypeptide 7 (galactosyltransferase I | B4galt7 | 364675 | 1,24 | down |
| 6403902 | 7161992 | 1280152 | xylosylprotein beta1,4-galactosyltransferase, polypeptide 7 (galactosyltransferase I | B4galt7 | 364675 | 1,14 | down |
| 6463410 | 7161992 | 1280152 | xylosylprotein beta1,4-galactosyltransferase, polypeptide 7 (galactosyltransferase I | B4galt7 | 364675 | 1,21 | down |
| 6326852 | 7069142 | 1053881 | Y box binding protein 2                                                              | Ybx2    | 303250 | 1,50 | up   |
| 6557845 | 7069142 | 1053881 | Y box binding protein 2                                                              | Ybx2    | 303250 | 1,19 | up   |
| 6713144 | 7069142 | 1053881 | Y box binding protein 2                                                              | Ybx2    | 303250 | 1,02 | down |
| 5635542 | 7303722 | 1631712 | yippee-like 5 (Drosophila)                                                           | Ypel5   | 298792 | 1,02 | down |
| 5636433 | 7303722 | 1631722 | yippee-like 5 (Drosophila)                                                           | Ypel5   | 298792 | 1,39 | down |
| 5757363 | 7303722 | 1631713 | yippee-like 5 (Drosophila)                                                           | Ypel5   | 298792 | 1,09 | up   |
| 5758787 | 7303722 | 1631712 | yippee-like 5 (Drosophila)                                                           | Ypel5   | 298792 | 1,04 | up   |
| 5783148 | 7303722 | 1631712 | yippee-like 5 (Drosophila)                                                           | Ypel5   | 298792 | 1,11 | down |

|         |         |         |                                                                       |        |        |      |      |
|---------|---------|---------|-----------------------------------------------------------------------|--------|--------|------|------|
| 6135055 | 7303722 | 1631712 | yippee-like 5 (Drosophila)                                            | Ypel5  | 298792 | 2,48 | down |
| 6183191 | 7303722 | 1631712 | yippee-like 5 (Drosophila)                                            | Ypel5  | 298792 | 1,33 | up   |
| 6210207 | 7303722 | 1631712 | yippee-like 5 (Drosophila)                                            | Ypel5  | 298792 | 1,00 | up   |
| 5654563 | 7192186 | 1355620 | YTH domain family, member 3                                           | Ythdf3 | 361920 | 1,19 | down |
| 6092746 | 7192186 | 1355621 | YTH domain family, member 3                                           | Ythdf3 | 361920 | 1,07 | up   |
| 6161893 | 7192186 | 1355613 | YTH domain family, member 3                                           | Ythdf3 | 361920 | 1,10 | down |
| 6635695 | 7192186 | 1355618 | YTH domain family, member 3                                           | Ythdf3 | 361920 | 1,12 | down |
| 5745893 | 7339110 | 1717616 | Zic family member 4                                                   | Zic4   | 315882 | 1,42 | up   |
| 5790248 | 7339110 | 1717617 | Zic family member 4                                                   | Zic4   | 315882 | 1,17 | up   |
| 6262398 | 7339110 | 1717619 | Zic family member 4                                                   | Zic4   | 315882 | 1,01 | down |
| 5643823 | 7374740 | 1808620 | zinc finger (CCCH type), RNA binding motif and serine/arginine rich 2 | Zrsr2  | 302670 | 1,11 | down |
| 5649718 | 7374740 | 1808633 | zinc finger (CCCH type), RNA binding motif and serine/arginine rich 2 | Zrsr2  | 302670 | 1,05 | up   |
| 5718302 | 7374740 | 1808625 | zinc finger (CCCH type), RNA binding motif and serine/arginine rich 2 | Zrsr2  | 302670 | 1,35 | down |
| 5865572 | 7374740 | 1808624 | zinc finger (CCCH type), RNA binding motif and serine/arginine rich 2 | Zrsr2  | 302670 | 2,53 | down |
| 5870014 | 7374740 | 1808623 | zinc finger (CCCH type), RNA binding motif and serine/arginine rich 2 | Zrsr2  | 302670 | 1,02 | down |
| 6018419 | 7374740 | 1808635 | zinc finger (CCCH type), RNA binding motif and serine/arginine rich 2 | Zrsr2  | 302670 | 1,23 | down |
| 6205719 | 7374740 | 1808630 | zinc finger (CCCH type), RNA binding motif and serine/arginine rich 2 | Zrsr2  | 302670 | 1,01 | down |
| 6312327 | 7374740 | 1808626 | zinc finger (CCCH type), RNA binding motif and serine/arginine rich 2 | Zrsr2  | 302670 | 1,30 | up   |
| 6430212 | 7374740 | 1808632 | zinc finger (CCCH type), RNA binding motif and serine/arginine rich 2 | Zrsr2  | 302670 | 1,15 | up   |
| 6432159 | 7374740 | 1808631 | zinc finger (CCCH type), RNA binding motif and serine/arginine rich 2 | Zrsr2  | 302670 | 1,14 | up   |
| 6512590 | 7374740 | 1808635 | zinc finger (CCCH type), RNA binding motif and serine/arginine rich 2 | Zrsr2  | 302670 | 1,60 | down |
| 6520435 | 7374740 | 1808629 | zinc finger (CCCH type), RNA binding motif and serine/arginine rich 2 | Zrsr2  | 302670 | 1,12 | down |
| 6571872 | 7374740 | 1808623 | zinc finger (CCCH type), RNA binding motif and serine/arginine rich 2 | Zrsr2  | 302670 | 1,27 | up   |
| 6637505 | 7374740 | 1808621 | zinc finger (CCCH type), RNA binding motif and serine/arginine rich 2 | Zrsr2  | 302670 | 1,13 | up   |
| 5677605 | 7206349 | 1390446 | zinc finger and BTB domain containing 10                              | Zbtb10 | 80338  | 1,06 | up   |
| 5769426 | 7206349 | 1390447 | zinc finger and BTB domain containing 10                              | Zbtb10 | 80338  | 1,33 | down |
| 5917184 | 7206349 | 1390454 | zinc finger and BTB domain containing 10                              | Zbtb10 | 80338  | 1,54 | up   |
| 6003532 | 7206349 | 1390449 | zinc finger and BTB domain containing 10                              | Zbtb10 | 80338  | 1,36 | down |
| 6031959 | 7206349 | 1390453 | zinc finger and BTB domain containing 10                              | Zbtb10 | 80338  | 2,15 | down |
| 6041637 | 7206349 | 1390451 | zinc finger and BTB domain containing 10                              | Zbtb10 | 80338  | 1,09 | up   |
| 6240912 | 7206349 | 1390447 | zinc finger and BTB domain containing 10                              | Zbtb10 | 80338  | 1,11 | up   |
| 6316284 | 7206349 | 1390452 | zinc finger and BTB domain containing 10                              | Zbtb10 | 80338  | 1,01 | down |
| 6353474 | 7206349 | 1390453 | zinc finger and BTB domain containing 10                              | Zbtb10 | 80338  | 1,39 | up   |
| 6426566 | 7206349 | 1390446 | zinc finger and BTB domain containing 10                              | Zbtb10 | 80338  | 1,06 | down |
| 6487212 | 7206349 | 1390448 | zinc finger and BTB domain containing 10                              | Zbtb10 | 80338  | 1,02 | up   |
| 6597112 | 7206349 | 1390454 | zinc finger and BTB domain containing 10                              | Zbtb10 | 80338  | 1,12 | down |
| 6724466 | 7206349 | 1390450 | zinc finger and BTB domain containing 10                              | Zbtb10 | 80338  | 1,13 | up   |
| 5633026 | 7281147 | 1575742 | zinc finger and BTB domain containing 17                              | Zbtb17 | 313666 | 1,28 | up   |
| 5633275 | 7281147 | 1575745 | zinc finger and BTB domain containing 17                              | Zbtb17 | 313666 | 1,01 | down |
| 5687897 | 7281147 | 1575746 | zinc finger and BTB domain containing 17                              | Zbtb17 | 313666 | 1,24 | up   |
| 5709333 | 7281147 | 1575738 | zinc finger and BTB domain containing 17                              | Zbtb17 | 313666 | 2,14 | up   |
| 5850769 | 7281147 | 1575743 | zinc finger and BTB domain containing 17                              | Zbtb17 | 313666 | 1,33 | up   |
| 5881149 | 7281147 | 1575750 | zinc finger and BTB domain containing 17                              | Zbtb17 | 313666 | 1,01 | down |
| 5956802 | 7281147 | 1575739 | zinc finger and BTB domain containing 17                              | Zbtb17 | 313666 | 1,03 | down |
| 6149414 | 7281147 | 1575740 | zinc finger and BTB domain containing 17                              | Zbtb17 | 313666 | 1,10 | down |
| 6161192 | 7281147 | 1575749 | zinc finger and BTB domain containing 17                              | Zbtb17 | 313666 | 1,73 | up   |
| 6355085 | 7281147 | 1575741 | zinc finger and BTB domain containing 17                              | Zbtb17 | 313666 | 1,22 | up   |
| 6478070 | 7281147 | 1575736 | zinc finger and BTB domain containing 17                              | Zbtb17 | 313666 | 1,28 | down |
| 6537660 | 7281147 | 1575744 | zinc finger and BTB domain containing 17                              | Zbtb17 | 313666 | 1,33 | up   |
| 6611104 | 7281147 | 1575735 | zinc finger and BTB domain containing 17                              | Zbtb17 | 313666 | 1,02 | up   |
| 6632545 | 7281147 | 1575751 | zinc finger and BTB domain containing 17                              | Zbtb17 | 313666 | 1,50 | down |
| 6632715 | 7281147 | 1575748 | zinc finger and BTB domain containing 17                              | Zbtb17 | 313666 | 1,14 | down |
| 6660151 | 7281147 | 1575750 | zinc finger and BTB domain containing 17                              | Zbtb17 | 313666 | 2,08 | down |
| 6709051 | 7281147 | 1575737 | zinc finger and BTB domain containing 17                              | Zbtb17 | 313666 | 1,84 | up   |
| 6739599 | 7281147 | 1575747 | zinc finger and BTB domain containing 17                              | Zbtb17 | 313666 | 1,28 | down |
| 5793511 | 7237725 | 1467554 | zinc finger and BTB domain containing 43                              | Zbtb43 | 311872 | 1,53 | down |

|         |         |         |                                          |         |        |      |      |
|---------|---------|---------|------------------------------------------|---------|--------|------|------|
| 5879156 | 7237725 | 1467551 | zinc finger and BTB domain containing 43 | Zbtb43  | 311872 | 1,25 | up   |
| 5893215 | 7237725 | 1467551 | zinc finger and BTB domain containing 43 | Zbtb43  | 311872 | 1,21 | down |
| 5899360 | 7237725 | 1467553 | zinc finger and BTB domain containing 43 | Zbtb43  | 311872 | 2,10 | up   |
| 6054043 | 7237725 | 1467550 | zinc finger and BTB domain containing 43 | Zbtb43  | 311872 | 1,13 | down |
| 6189600 | 7237725 | 1467552 | zinc finger and BTB domain containing 43 | Zbtb43  | 311872 | 1,37 | down |
| 6325578 | 7237725 | 1467551 | zinc finger and BTB domain containing 43 | Zbtb43  | 311872 | 1,20 | up   |
| 5663051 | 7290942 | 1599134 | zinc finger CCCH type containing 12A     | Zc3h12a | 313587 | 2,36 | up   |
| 5804068 | 7290942 | 1599135 | zinc finger CCCH type containing 12A     | Zc3h12a | 313587 | 1,14 | down |
| 5853885 | 7290942 | 1599138 | zinc finger CCCH type containing 12A     | Zc3h12a | 313587 | 1,36 | up   |
| 5905331 | 7290942 | 1599131 | zinc finger CCCH type containing 12A     | Zc3h12a | 313587 | 1,48 | down |
| 6028004 | 7290942 | 1599132 | zinc finger CCCH type containing 12A     | Zc3h12a | 313587 | 1,49 | up   |
| 6032991 | 7290942 | 1599131 | zinc finger CCCH type containing 12A     | Zc3h12a | 313587 | 2,23 | down |
| 6230308 | 7290942 | 1599133 | zinc finger CCCH type containing 12A     | Zc3h12a | 313587 | 1,38 | up   |
| 6351883 | 7290942 | 1599138 | zinc finger CCCH type containing 12A     | Zc3h12a | 313587 | 1,97 | up   |
| 5645113 | 7064732 | 1042932 | zinc finger CCCH type containing 7 A     | Zc3h7a  | 360466 | 1,10 | down |
| 5657773 | 7064732 | 1042932 | zinc finger CCCH type containing 7 A     | Zc3h7a  | 360466 | 1,01 | down |
| 5673460 | 7064732 | 1042924 | zinc finger CCCH type containing 7 A     | Zc3h7a  | 360466 | 1,15 | down |
| 5677154 | 7064732 | 1042921 | zinc finger CCCH type containing 7 A     | Zc3h7a  | 360466 | 1,14 | up   |
| 5678857 | 7064732 | 1042911 | zinc finger CCCH type containing 7 A     | Zc3h7a  | 360466 | 1,17 | up   |
| 5817771 | 7064732 | 1042916 | zinc finger CCCH type containing 7 A     | Zc3h7a  | 360466 | 1,08 | up   |
| 5830804 | 7064732 | 1042936 | zinc finger CCCH type containing 7 A     | Zc3h7a  | 360466 | 1,25 | down |
| 5943499 | 7064732 | 1042915 | zinc finger CCCH type containing 7 A     | Zc3h7a  | 360466 | 1,76 | up   |
| 6015462 | 7064732 | 1042913 | zinc finger CCCH type containing 7 A     | Zc3h7a  | 360466 | 1,33 | up   |
| 6062139 | 7064732 | 1042920 | zinc finger CCCH type containing 7 A     | Zc3h7a  | 360466 | 1,17 | up   |
| 6119092 | 7064732 | 1042926 | zinc finger CCCH type containing 7 A     | Zc3h7a  | 360466 | 1,23 | up   |
| 6260083 | 7064732 | 1042934 | zinc finger CCCH type containing 7 A     | Zc3h7a  | 360466 | 1,30 | up   |
| 6283778 | 7064732 | 1042927 | zinc finger CCCH type containing 7 A     | Zc3h7a  | 360466 | 1,01 | up   |
| 6350431 | 7064732 | 1042935 | zinc finger CCCH type containing 7 A     | Zc3h7a  | 360466 | 1,31 | down |
| 6350619 | 7064732 | 1042914 | zinc finger CCCH type containing 7 A     | Zc3h7a  | 360466 | 1,19 | up   |
| 6360112 | 7064732 | 1042922 | zinc finger CCCH type containing 7 A     | Zc3h7a  | 360466 | 1,40 | up   |
| 6371471 | 7064732 | 1042918 | zinc finger CCCH type containing 7 A     | Zc3h7a  | 360466 | 1,03 | down |
| 6521018 | 7064732 | 1042925 | zinc finger CCCH type containing 7 A     | Zc3h7a  | 360466 | 1,06 | up   |
| 6545671 | 7064732 | 1042919 | zinc finger CCCH type containing 7 A     | Zc3h7a  | 360466 | 1,29 | up   |
| 6573656 | 7064732 | 1042928 | zinc finger CCCH type containing 7 A     | Zc3h7a  | 360466 | 1,18 | up   |
| 6616429 | 7064732 | 1042923 | zinc finger CCCH type containing 7 A     | Zc3h7a  | 360466 | 1,23 | up   |
| 6632164 | 7064732 | 1042933 | zinc finger CCCH type containing 7 A     | Zc3h7a  | 360466 | 1,58 | down |
| 6695414 | 7064732 | 1042917 | zinc finger CCCH type containing 7 A     | Zc3h7a  | 360466 | 1,02 | down |
| 6719832 | 7064732 | 1042922 | zinc finger CCCH type containing 7 A     | Zc3h7a  | 360466 | 1,17 | down |
| 6737456 | 7064732 | 1042912 | zinc finger CCCH type containing 7 A     | Zc3h7a  | 360466 | 1,01 | up   |
| 5772082 | 7229382 | 1446271 | zinc finger CCCH-type containing 15      | Zc3h15  | 362154 | 1,01 | up   |
| 5962765 | 7229382 | 1446266 | zinc finger CCCH-type containing 15      | Zc3h15  | 362154 | 1,10 | down |
| 6177284 | 7229382 | 1446271 | zinc finger CCCH-type containing 15      | Zc3h15  | 362154 | 1,28 | up   |
| 6316344 | 7229382 | 1446265 | zinc finger CCCH-type containing 15      | Zc3h15  | 362154 | 1,15 | up   |
| 6364548 | 7229382 | 1446271 | zinc finger CCCH-type containing 15      | Zc3h15  | 362154 | 1,01 | down |
| 6392879 | 7229382 | 1446267 | zinc finger CCCH-type containing 15      | Zc3h15  | 362154 | 1,44 | up   |
| 6414720 | 7229382 | 1446264 | zinc finger CCCH-type containing 15      | Zc3h15  | 362154 | 1,01 | up   |
| 6472378 | 7229382 | 1446269 | zinc finger CCCH-type containing 15      | Zc3h15  | 362154 | 1,22 | up   |
| 6489732 | 7229382 | 1446261 | zinc finger CCCH-type containing 15      | Zc3h15  | 362154 | 1,07 | up   |
| 6566077 | 7229382 | 1446262 | zinc finger CCCH-type containing 15      | Zc3h15  | 362154 | 2,01 | down |
| 6628350 | 7229382 | 1446263 | zinc finger CCCH-type containing 15      | Zc3h15  | 362154 | 2,40 | down |
| 6686879 | 7229382 | 1446270 | zinc finger CCCH-type containing 15      | Zc3h15  | 362154 | 1,04 | down |
| 6728669 | 7229382 | 1446268 | zinc finger CCCH-type containing 15      | Zc3h15  | 362154 | 1,14 | down |
| 6737875 | 7229382 | 1446261 | zinc finger CCCH-type containing 15      | Zc3h15  | 362154 | 1,43 | down |
| 5689368 | 7319151 | 1670138 | zinc finger CCCH-type containing 7B      | Zc3h7b  | 315158 | 1,06 | down |
| 5708942 | 7319151 | 1670134 | zinc finger CCCH-type containing 7B      | Zc3h7b  | 315158 | 1,01 | up   |
| 5776151 | 7319151 | 1670121 | zinc finger CCCH-type containing 7B      | Zc3h7b  | 315158 | 1,08 | up   |

|         |         |         |                                        |        |        |      |      |
|---------|---------|---------|----------------------------------------|--------|--------|------|------|
| 5844151 | 7319151 | 1670140 | zinc finger CCCH-type containing 7B    | Zc3h7b | 315158 | 1,14 | down |
| 5890610 | 7319151 | 1670123 | zinc finger CCCH-type containing 7B    | Zc3h7b | 315158 | 1,13 | up   |
| 5952359 | 7319151 | 1670118 | zinc finger CCCH-type containing 7B    | Zc3h7b | 315158 | 1,01 | up   |
| 6086088 | 7319151 | 1670127 | zinc finger CCCH-type containing 7B    | Zc3h7b | 315158 | 1,51 | up   |
| 6115782 | 7319151 | 1670122 | zinc finger CCCH-type containing 7B    | Zc3h7b | 315158 | 1,05 | up   |
| 6188341 | 7319151 | 1670117 | zinc finger CCCH-type containing 7B    | Zc3h7b | 315158 | 1,12 | up   |
| 6207249 | 7319151 | 1670124 | zinc finger CCCH-type containing 7B    | Zc3h7b | 315158 | 1,16 | up   |
| 6277125 | 7319151 | 1670131 | zinc finger CCCH-type containing 7B    | Zc3h7b | 315158 | 1,12 | down |
| 6296269 | 7319151 | 1670128 | zinc finger CCCH-type containing 7B    | Zc3h7b | 315158 | 1,04 | up   |
| 6313844 | 7319151 | 1670137 | zinc finger CCCH-type containing 7B    | Zc3h7b | 315158 | 1,03 | up   |
| 6329366 | 7319151 | 1670125 | zinc finger CCCH-type containing 7B    | Zc3h7b | 315158 | 1,30 | down |
| 6334360 | 7319151 | 1670130 | zinc finger CCCH-type containing 7B    | Zc3h7b | 315158 | 1,21 | up   |
| 6373190 | 7319151 | 1670129 | zinc finger CCCH-type containing 7B    | Zc3h7b | 315158 | 1,04 | up   |
| 6393002 | 7319151 | 1670119 | zinc finger CCCH-type containing 7B    | Zc3h7b | 315158 | 1,02 | down |
| 6432559 | 7319151 | 1670116 | zinc finger CCCH-type containing 7B    | Zc3h7b | 315158 | 1,14 | down |
| 6479824 | 7319151 | 1670115 | zinc finger CCCH-type containing 7B    | Zc3h7b | 315158 | 1,30 | down |
| 6492066 | 7319151 | 1670139 | zinc finger CCCH-type containing 7B    | Zc3h7b | 315158 | 1,15 | up   |
| 6541543 | 7319151 | 1670135 | zinc finger CCCH-type containing 7B    | Zc3h7b | 315158 | 1,15 | up   |
| 6579453 | 7319151 | 1670126 | zinc finger CCCH-type containing 7B    | Zc3h7b | 315158 | 1,09 | down |
| 6673575 | 7319151 | 1670136 | zinc finger CCCH-type containing 7B    | Zc3h7b | 315158 | 1,40 | up   |
| 5754073 | 7180861 | 1327176 | zinc finger homeobox 3                 | Zfhx3  | 307829 | 1,10 | down |
| 5800698 | 7180861 | 1327225 | zinc finger homeobox 3                 | Zfhx3  | 307829 | 1,57 | down |
| 6006309 | 7180861 | 1327176 | zinc finger homeobox 3                 | Zfhx3  | 307829 | 1,56 | up   |
| 6093538 | 7180861 | 1327226 | zinc finger homeobox 3                 | Zfhx3  | 307829 | 1,21 | down |
| 6525406 | 7180861 | 1327176 | zinc finger homeobox 3                 | Zfhx3  | 307829 | 1,21 | up   |
| 6566250 | 7180861 | 1327176 | zinc finger homeobox 3                 | Zfhx3  | 307829 | 1,30 | down |
| 5681918 | 7048757 | 1007020 | zinc finger protein 111                | Zfp111 | 170849 | 1,21 | up   |
| 5701281 | 7048757 | 1007017 | zinc finger protein 111                | Zfp111 | 170849 | 1,31 | up   |
| 5769081 | 7048757 | 1007017 | zinc finger protein 111                | Zfp111 | 170849 | 1,02 | up   |
| 5778899 | 7048757 | 1007017 | zinc finger protein 111                | Zfp111 | 170849 | 1,10 | down |
| 5796157 | 7048757 | 1007017 | zinc finger protein 111                | Zfp111 | 170849 | 1,64 | down |
| 5873564 | 7048757 | 1007019 | zinc finger protein 111                | Zfp111 | 170849 | 1,21 | up   |
| 5988826 | 7048757 | 1007017 | zinc finger protein 111                | Zfp111 | 170849 | 1,19 | up   |
| 6062676 | 7048757 | 1007018 | zinc finger protein 111                | Zfp111 | 170849 | 1,01 | up   |
| 6298615 | 7048757 | 1007017 | zinc finger protein 111                | Zfp111 | 170849 | 1,52 | up   |
| 6400661 | 7048757 | 1007017 | zinc finger protein 111                | Zfp111 | 170849 | 1,06 | up   |
| 6417937 | 7048757 | 1007020 | zinc finger protein 111                | Zfp111 | 170849 | 1,05 | down |
| 6468144 | 7048757 | 1007017 | zinc finger protein 111                | Zfp111 | 170849 | 1,10 | down |
| 6522901 | 7048757 | 1007017 | zinc finger protein 111                | Zfp111 | 170849 | 1,12 | down |
| 6687173 | 7048757 | 1007017 | zinc finger protein 111                | Zfp111 | 170849 | 2,12 | down |
| 5661900 | 7363765 | 1778581 | zinc finger protein 142 (clone pHZ-49) | Znf142 | 316524 | 1,03 | up   |
| 5767345 | 7363765 | 1778582 | zinc finger protein 142 (clone pHZ-49) | Znf142 | 316524 | 2,07 | down |
| 5797559 | 7363765 | 1778583 | zinc finger protein 142 (clone pHZ-49) | Znf142 | 316524 | 1,23 | up   |
| 5814182 | 7363765 | 1778581 | zinc finger protein 142 (clone pHZ-49) | Znf142 | 316524 | 1,16 | down |
| 5817047 | 7363765 | 1778581 | zinc finger protein 142 (clone pHZ-49) | Znf142 | 316524 | 1,24 | down |
| 5871598 | 7363765 | 1778587 | zinc finger protein 142 (clone pHZ-49) | Znf142 | 316524 | 1,01 | down |
| 5895658 | 7363765 | 1778586 | zinc finger protein 142 (clone pHZ-49) | Znf142 | 316524 | 1,19 | up   |
| 5896648 | 7363765 | 1778592 | zinc finger protein 142 (clone pHZ-49) | Znf142 | 316524 | 1,02 | up   |
| 5915167 | 7363765 | 1778581 | zinc finger protein 142 (clone pHZ-49) | Znf142 | 316524 | 1,30 | down |
| 5988955 | 7363765 | 1778587 | zinc finger protein 142 (clone pHZ-49) | Znf142 | 316524 | 1,14 | up   |
| 6104525 | 7363765 | 1778587 | zinc finger protein 142 (clone pHZ-49) | Znf142 | 316524 | 1,02 | down |
| 6134543 | 7363765 | 1778588 | zinc finger protein 142 (clone pHZ-49) | Znf142 | 316524 | 1,07 | down |
| 6155956 | 7363765 | 1778577 | zinc finger protein 142 (clone pHZ-49) | Znf142 | 316524 | 1,29 | down |
| 6181318 | 7363765 | 1778586 | zinc finger protein 142 (clone pHZ-49) | Znf142 | 316524 | 1,24 | up   |
| 6208618 | 7363765 | 1778581 | zinc finger protein 142 (clone pHZ-49) | Znf142 | 316524 | 1,00 | down |
| 6224174 | 7363765 | 1778582 | zinc finger protein 142 (clone pHZ-49) | Znf142 | 316524 | 1,13 | down |

|         |         |         |                                        |        |        |      |      |
|---------|---------|---------|----------------------------------------|--------|--------|------|------|
| 6249560 | 7363765 | 1778578 | zinc finger protein 142 (clone pHZ-49) | Znf142 | 316524 | 1,10 | up   |
| 6266643 | 7363765 | 1778583 | zinc finger protein 142 (clone pHZ-49) | Znf142 | 316524 | 1,02 | down |
| 6297610 | 7363765 | 1778590 | zinc finger protein 142 (clone pHZ-49) | Znf142 | 316524 | 1,17 | down |
| 6328556 | 7363765 | 1778584 | zinc finger protein 142 (clone pHZ-49) | Znf142 | 316524 | 1,23 | down |
| 6406293 | 7363765 | 1778578 | zinc finger protein 142 (clone pHZ-49) | Znf142 | 316524 | 1,01 | up   |
| 6484228 | 7363765 | 1778581 | zinc finger protein 142 (clone pHZ-49) | Znf142 | 316524 | 1,01 | down |
| 6486292 | 7363765 | 1778584 | zinc finger protein 142 (clone pHZ-49) | Znf142 | 316524 | 1,03 | down |
| 6488417 | 7363765 | 1778583 | zinc finger protein 142 (clone pHZ-49) | Znf142 | 316524 | 1,29 | up   |
| 6493915 | 7363765 | 1778583 | zinc finger protein 142 (clone pHZ-49) | Znf142 | 316524 | 1,08 | up   |
| 6500826 | 7363765 | 1778581 | zinc finger protein 142 (clone pHZ-49) | Znf142 | 316524 | 1,10 | up   |
| 6572721 | 7363765 | 1778580 | zinc finger protein 142 (clone pHZ-49) | Znf142 | 316524 | 1,30 | down |
| 6633895 | 7363765 | 1778586 | zinc finger protein 142 (clone pHZ-49) | Znf142 | 316524 | 1,08 | up   |
| 6662336 | 7363765 | 1778589 | zinc finger protein 142 (clone pHZ-49) | Znf142 | 316524 | 1,31 | up   |
| 6669307 | 7363765 | 1778579 | zinc finger protein 142 (clone pHZ-49) | Znf142 | 316524 | 1,15 | down |
| 6726395 | 7363765 | 1778583 | zinc finger protein 142 (clone pHZ-49) | Znf142 | 316524 | 1,06 | up   |
| 5812384 | 7035403 | 974429  | zinc finger protein 143                | Zfp143 | 361627 | 2,17 | down |
| 5835336 | 7035403 | 974422  | zinc finger protein 143                | Zfp143 | 361627 | 1,10 | down |
| 5909667 | 7035403 | 974430  | zinc finger protein 143                | Zfp143 | 361627 | 1,15 | down |
| 5989159 | 7035403 | 974433  | zinc finger protein 143                | Zfp143 | 361627 | 1,06 | down |
| 6020592 | 7035403 | 974427  | zinc finger protein 143                | Zfp143 | 361627 | 1,12 | down |
| 6039081 | 7035403 | 974431  | zinc finger protein 143                | Zfp143 | 361627 | 1,42 | down |
| 6113330 | 7035403 | 974424  | zinc finger protein 143                | Zfp143 | 361627 | 1,44 | up   |
| 6118217 | 7035403 | 974423  | zinc finger protein 143                | Zfp143 | 361627 | 1,40 | up   |
| 6124659 | 7035403 | 974425  | zinc finger protein 143                | Zfp143 | 361627 | 1,25 | down |
| 6259117 | 7035403 | 974421  | zinc finger protein 143                | Zfp143 | 361627 | 1,65 | down |
| 6273611 | 7035403 | 974435  | zinc finger protein 143                | Zfp143 | 361627 | 1,22 | down |
| 6303635 | 7035403 | 974426  | zinc finger protein 143                | Zfp143 | 361627 | 1,22 | down |
| 6356255 | 7035403 | 974421  | zinc finger protein 143                | Zfp143 | 361627 | 1,39 | up   |
| 6413494 | 7035403 | 974432  | zinc finger protein 143                | Zfp143 | 361627 | 1,28 | down |
| 6624706 | 7035403 | 974434  | zinc finger protein 143                | Zfp143 | 361627 | 1,65 | up   |
| 6675684 | 7035403 | 974436  | zinc finger protein 143                | Zfp143 | 361627 | 1,34 | down |
| 6723418 | 7035403 | 974428  | zinc finger protein 143                | Zfp143 | 361627 | 1,07 | up   |
| 5658018 | 7094048 | 1112703 | zinc finger protein 148                | Zfp148 | 58820  | 1,13 | up   |
| 5727699 | 7094048 | 1112706 | zinc finger protein 148                | Zfp148 | 58820  | 1,73 | down |
| 5735043 | 7094048 | 1112710 | zinc finger protein 148                | Zfp148 | 58820  | 1,06 | up   |
| 5747604 | 7094048 | 1112707 | zinc finger protein 148                | Zfp148 | 58820  | 1,04 | up   |
| 5887659 | 7094048 | 1112706 | zinc finger protein 148                | Zfp148 | 58820  | 2,04 | down |
| 5906494 | 7094048 | 1112712 | zinc finger protein 148                | Zfp148 | 58820  | 1,13 | up   |
| 6092403 | 7094048 | 1112705 | zinc finger protein 148                | Zfp148 | 58820  | 1,31 | down |
| 6093280 | 7094048 | 1112709 | zinc finger protein 148                | Zfp148 | 58820  | 1,01 | down |
| 6232008 | 7094048 | 1112703 | zinc finger protein 148                | Zfp148 | 58820  | 1,12 | up   |
| 6266699 | 7094048 | 1112705 | zinc finger protein 148                | Zfp148 | 58820  | 1,04 | down |
| 6406437 | 7094048 | 1112704 | zinc finger protein 148                | Zfp148 | 58820  | 1,00 | down |
| 6476455 | 7094048 | 1112711 | zinc finger protein 148                | Zfp148 | 58820  | 1,21 | up   |
| 6544345 | 7094048 | 1112704 | zinc finger protein 148                | Zfp148 | 58820  | 1,22 | down |
| 6562153 | 7094048 | 1112708 | zinc finger protein 148                | Zfp148 | 58820  | 1,07 | down |
| 5625550 | 7335091 | 1707334 | zinc finger protein 202                | Zfp202 | 500981 | 1,62 | up   |
| 5666421 | 7335091 | 1707334 | zinc finger protein 202                | Zfp202 | 500981 | 2,28 | down |
| 5777556 | 7335091 | 1707333 | zinc finger protein 202                | Zfp202 | 500981 | 1,26 | down |
| 5970610 | 7335091 | 1707331 | zinc finger protein 202                | Zfp202 | 500981 | 1,12 | down |
| 6040542 | 7335091 | 1707329 | zinc finger protein 202                | Zfp202 | 500981 | 1,31 | up   |
| 6186397 | 7335091 | 1707334 | zinc finger protein 202                | Zfp202 | 500981 | 1,01 | up   |
| 6211797 | 7335091 | 1707334 | zinc finger protein 202                | Zfp202 | 500981 | 1,96 | up   |
| 6229836 | 7335091 | 1707334 | zinc finger protein 202                | Zfp202 | 500981 | 1,77 | down |
| 6324736 | 7335091 | 1707333 | zinc finger protein 202                | Zfp202 | 500981 | 1,14 | up   |
| 6341663 | 7335091 | 1707333 | zinc finger protein 202                | Zfp202 | 500981 | 1,20 | up   |

|         |         |         |                         |        |        |      |      |
|---------|---------|---------|-------------------------|--------|--------|------|------|
| 6407033 | 7335091 | 1707325 | zinc finger protein 202 | Zfp202 | 500981 | 1,99 | up   |
| 6507937 | 7335091 | 1707325 | zinc finger protein 202 | Zfp202 | 500981 | 1,09 | up   |
| 6606319 | 7335091 | 1707328 | zinc finger protein 202 | Zfp202 | 500981 | 1,51 | down |
| 6746459 | 7335091 | 1707327 | zinc finger protein 202 | Zfp202 | 500981 | 1,03 | down |
| 5740153 | 7074989 | 1068379 | zinc finger protein 263 | Zfp263 | 287076 | 1,75 | down |
| 5746194 | 7074989 | 1068378 | zinc finger protein 263 | Zfp263 | 287076 | 1,34 | up   |
| 6068932 | 7074989 | 1068374 | zinc finger protein 263 | Zfp263 | 287076 | 1,32 | up   |
| 6181886 | 7074989 | 1068374 | zinc finger protein 263 | Zfp263 | 287076 | 1,44 | up   |
| 6253512 | 7074989 | 1068374 | zinc finger protein 263 | Zfp263 | 287076 | 1,18 | up   |
| 6297952 | 7074989 | 1068378 | zinc finger protein 263 | Zfp263 | 287076 | 1,19 | down |
| 6343479 | 7074989 | 1068374 | zinc finger protein 263 | Zfp263 | 287076 | 1,00 | up   |
| 6424726 | 7074989 | 1068375 | zinc finger protein 263 | Zfp263 | 287076 | 1,11 | up   |
| 6444645 | 7074989 | 1068374 | zinc finger protein 263 | Zfp263 | 287076 | 1,15 | down |
| 6536656 | 7074989 | 1068381 | zinc finger protein 263 | Zfp263 | 287076 | 2,40 | up   |
| 6561901 | 7074989 | 1068374 | zinc finger protein 263 | Zfp263 | 287076 | 1,07 | down |
| 6716624 | 7074989 | 1068377 | zinc finger protein 263 | Zfp263 | 287076 | 1,12 | up   |
| 5665091 | 7120379 | 1178329 | zinc finger protein 278 | Zfp278 | 305471 | 1,06 | up   |
| 5692780 | 7120379 | 1178335 | zinc finger protein 278 | Zfp278 | 305471 | 1,34 | up   |
| 5905053 | 7120379 | 1178329 | zinc finger protein 278 | Zfp278 | 305471 | 1,08 | up   |
| 5963639 | 7120379 | 1178334 | zinc finger protein 278 | Zfp278 | 305471 | 1,00 | down |
| 6028987 | 7120379 | 1178335 | zinc finger protein 278 | Zfp278 | 305471 | 1,32 | up   |
| 6083686 | 7120379 | 1178331 | zinc finger protein 278 | Zfp278 | 305471 | 1,05 | up   |
| 6213130 | 7120379 | 1178334 | zinc finger protein 278 | Zfp278 | 305471 | 1,08 | down |
| 6236520 | 7120379 | 1178329 | zinc finger protein 278 | Zfp278 | 305471 | 1,11 | up   |
| 6271079 | 7120379 | 1178329 | zinc finger protein 278 | Zfp278 | 305471 | 1,13 | down |
| 6329856 | 7120379 | 1178329 | zinc finger protein 278 | Zfp278 | 305471 | 1,43 | down |
| 6375758 | 7120379 | 1178334 | zinc finger protein 278 | Zfp278 | 305471 | 1,43 | up   |
| 6622384 | 7120379 | 1178331 | zinc finger protein 278 | Zfp278 | 305471 | 1,13 | up   |
| 6679683 | 7120379 | 1178335 | zinc finger protein 278 | Zfp278 | 305471 | 1,10 | down |
| 5808359 | 7359551 | 1768643 | zinc finger protein 318 | Zfp318 | 685082 | 1,15 | up   |
| 6071799 | 7359551 | 1768622 | zinc finger protein 318 | Zfp318 | 685082 | 1,35 | down |
| 6318998 | 7359551 | 1768644 | zinc finger protein 318 | Zfp318 | 685082 | 1,07 | up   |
| 6511726 | 7359551 | 1768622 | zinc finger protein 318 | Zfp318 | 685082 | 1,38 | down |
| 5767905 | 7247848 | 1492054 | zinc finger protein 335 | Zfp335 | 259270 | 1,13 | down |
| 5851093 | 7247848 | 1492049 | zinc finger protein 335 | Zfp335 | 259270 | 1,30 | down |
| 5867650 | 7247848 | 1492058 | zinc finger protein 335 | Zfp335 | 259270 | 1,03 | down |
| 5980315 | 7247848 | 1492049 | zinc finger protein 335 | Zfp335 | 259270 | 1,04 | up   |
| 5984059 | 7247848 | 1492053 | zinc finger protein 335 | Zfp335 | 259270 | 1,11 | down |
| 5988610 | 7247848 | 1492056 | zinc finger protein 335 | Zfp335 | 259270 | 1,08 | down |
| 6013859 | 7247848 | 1492052 | zinc finger protein 335 | Zfp335 | 259270 | 1,03 | up   |
| 6027544 | 7247848 | 1492051 | zinc finger protein 335 | Zfp335 | 259270 | 1,40 | down |
| 6035090 | 7247848 | 1492055 | zinc finger protein 335 | Zfp335 | 259270 | 1,17 | up   |
| 6226857 | 7247848 | 1492045 | zinc finger protein 335 | Zfp335 | 259270 | 2,15 | down |
| 6250517 | 7247848 | 1492050 | zinc finger protein 335 | Zfp335 | 259270 | 1,08 | up   |
| 6252548 | 7247848 | 1492057 | zinc finger protein 335 | Zfp335 | 259270 | 1,06 | up   |
| 6316082 | 7247848 | 1492060 | zinc finger protein 335 | Zfp335 | 259270 | 1,15 | down |
| 6318114 | 7247848 | 1492047 | zinc finger protein 335 | Zfp335 | 259270 | 1,18 | down |
| 6336863 | 7247848 | 1492048 | zinc finger protein 335 | Zfp335 | 259270 | 1,36 | up   |
| 6373986 | 7247848 | 1492046 | zinc finger protein 335 | Zfp335 | 259270 | 1,06 | down |
| 6455602 | 7247848 | 1492072 | zinc finger protein 335 | Zfp335 | 259270 | 1,05 | up   |
| 6501024 | 7247848 | 1492052 | zinc finger protein 335 | Zfp335 | 259270 | 1,33 | down |
| 6568686 | 7247848 | 1492059 | zinc finger protein 335 | Zfp335 | 259270 | 1,23 | up   |
| 6596551 | 7247848 | 1492060 | zinc finger protein 335 | Zfp335 | 259270 | 1,07 | up   |
| 6605188 | 7247848 | 1492062 | zinc finger protein 335 | Zfp335 | 259270 | 1,05 | down |
| 5809696 | 7049312 | 1008131 | zinc finger protein 36  | Zfp36  | 79426  | 1,21 | up   |
| 6380219 | 7049312 | 1008132 | zinc finger protein 36  | Zfp36  | 79426  | 3,33 | down |

|         |         |         |                         |        |        |      |      |
|---------|---------|---------|-------------------------|--------|--------|------|------|
| 6414960 | 7049312 | 1008131 | zinc finger protein 36  | Zfp36  | 79426  | 1,06 | up   |
| 6665859 | 7049312 | 1008131 | zinc finger protein 36  | Zfp36  | 79426  | 1,11 | up   |
| 5635926 | 7191654 | 1354338 | zinc finger protein 458 | Zfp458 | 499563 | 1,06 | down |
| 5727099 | 7191654 | 1354340 | zinc finger protein 458 | Zfp458 | 499563 | 1,09 | down |
| 5747947 | 7191654 | 1354340 | zinc finger protein 458 | Zfp458 | 499563 | 1,06 | up   |
| 5780960 | 7191654 | 1354340 | zinc finger protein 458 | Zfp458 | 499563 | 1,03 | up   |
| 5831340 | 7191654 | 1354338 | zinc finger protein 458 | Zfp458 | 499563 | 1,04 | down |
| 6100052 | 7191654 | 1354340 | zinc finger protein 458 | Zfp458 | 499563 | 1,04 | up   |
| 6179027 | 7191654 | 1354340 | zinc finger protein 458 | Zfp458 | 499563 | 1,02 | up   |
| 6293567 | 7191654 | 1354340 | zinc finger protein 458 | Zfp458 | 499563 | 1,01 | down |
| 6334450 | 7191654 | 1354340 | zinc finger protein 458 | Zfp458 | 499563 | 2,71 | up   |
| 6372112 | 7191654 | 1354340 | zinc finger protein 458 | Zfp458 | 499563 | 1,15 | down |
| 6403946 | 7191654 | 1354341 | zinc finger protein 458 | Zfp458 | 499563 | 1,41 | down |
| 6502140 | 7191654 | 1354340 | zinc finger protein 458 | Zfp458 | 499563 | 1,09 | down |
| 6510556 | 7191654 | 1354339 | zinc finger protein 458 | Zfp458 | 499563 | 1,15 | down |
| 6535991 | 7191654 | 1354340 | zinc finger protein 458 | Zfp458 | 499563 | 1,02 | up   |
| 6567107 | 7191654 | 1354340 | zinc finger protein 458 | Zfp458 | 499563 | 1,03 | up   |
| 6598093 | 7191654 | 1354340 | zinc finger protein 458 | Zfp458 | 499563 | 1,66 | up   |
| 6637274 | 7191654 | 1354342 | zinc finger protein 458 | Zfp458 | 499563 | 1,02 | down |
| 6676976 | 7191654 | 1354340 | zinc finger protein 458 | Zfp458 | 499563 | 1,12 | up   |
| 6683802 | 7191654 | 1354340 | zinc finger protein 458 | Zfp458 | 499563 | 1,04 | up   |
| 6692234 | 7191654 | 1354340 | zinc finger protein 458 | Zfp458 | 499563 | 1,02 | up   |
| 5675826 | 7129688 | 1200560 | zinc finger protein 503 | Znf503 | 305687 | 1,15 | down |
| 5810811 | 7129688 | 1200558 | zinc finger protein 503 | Znf503 | 305687 | 1,16 | down |
| 6370586 | 7129688 | 1200560 | zinc finger protein 503 | Znf503 | 305687 | 1,12 | up   |
| 6419274 | 7129688 | 1200558 | zinc finger protein 503 | Znf503 | 305687 | 1,51 | down |
| 6442614 | 7129688 | 1200559 | zinc finger protein 503 | Znf503 | 305687 | 1,37 | up   |
| 6470937 | 7129688 | 1200560 | zinc finger protein 503 | Znf503 | 305687 | 1,07 | down |
| 6486552 | 7129688 | 1200560 | zinc finger protein 503 | Znf503 | 305687 | 1,17 | down |
| 6596860 | 7129688 | 1200560 | zinc finger protein 503 | Znf503 | 305687 | 1,00 | down |
| 6610400 | 7129688 | 1200559 | zinc finger protein 503 | Znf503 | 305687 | 1,12 | down |
| 6692367 | 7129688 | 1200558 | zinc finger protein 503 | Znf503 | 305687 | 1,09 | up   |
| 5660500 | 7029052 | 958808  | zinc finger protein 541 | Znf541 | 308108 | 1,05 | up   |
| 5744099 | 7029052 | 958794  | zinc finger protein 541 | Znf541 | 308108 | 1,06 | down |
| 5775811 | 7029052 | 958806  | zinc finger protein 541 | Znf541 | 308108 | 1,06 | down |
| 5878852 | 7029052 | 958803  | zinc finger protein 541 | Znf541 | 308108 | 1,13 | up   |
| 5900335 | 7029052 | 958796  | zinc finger protein 541 | Znf541 | 308108 | 1,14 | up   |
| 5934926 | 7029052 | 958794  | zinc finger protein 541 | Znf541 | 308108 | 1,21 | down |
| 6243177 | 7029052 | 958802  | zinc finger protein 541 | Znf541 | 308108 | 2,76 | down |
| 6321095 | 7029052 | 958801  | zinc finger protein 541 | Znf541 | 308108 | 1,24 | up   |
| 6430716 | 7029052 | 958805  | zinc finger protein 541 | Znf541 | 308108 | 1,48 | down |
| 6475896 | 7029052 | 958794  | zinc finger protein 541 | Znf541 | 308108 | 1,06 | up   |
| 6481809 | 7029052 | 958804  | zinc finger protein 541 | Znf541 | 308108 | 1,02 | up   |
| 6575389 | 7029052 | 958800  | zinc finger protein 541 | Znf541 | 308108 | 1,10 | down |
| 6588906 | 7029052 | 958797  | zinc finger protein 541 | Znf541 | 308108 | 1,17 | down |
| 6679472 | 7029052 | 958807  | zinc finger protein 541 | Znf541 | 308108 | 1,11 | down |
| 6683194 | 7029052 | 958794  | zinc finger protein 541 | Znf541 | 308108 | 1,80 | down |
| 5718555 | 7343092 | 1727655 | zinc finger protein 653 | Zfp653 | 300446 | 3,08 | down |
| 5734541 | 7343092 | 1727653 | zinc finger protein 653 | Zfp653 | 300446 | 1,32 | down |
| 5770014 | 7343092 | 1727652 | zinc finger protein 653 | Zfp653 | 300446 | 1,22 | up   |
| 5777659 | 7343092 | 1727653 | zinc finger protein 653 | Zfp653 | 300446 | 1,15 | up   |
| 5924658 | 7343092 | 1727656 | zinc finger protein 653 | Zfp653 | 300446 | 1,45 | up   |
| 5968745 | 7343092 | 1727647 | zinc finger protein 653 | Zfp653 | 300446 | 1,48 | down |
| 6112451 | 7343092 | 1727649 | zinc finger protein 653 | Zfp653 | 300446 | 1,04 | up   |
| 6148312 | 7343092 | 1727651 | zinc finger protein 653 | Zfp653 | 300446 | 2,07 | down |
| 6205093 | 7343092 | 1727654 | zinc finger protein 653 | Zfp653 | 300446 | 1,27 | up   |

|         |         |         |                                          |         |        |      |      |
|---------|---------|---------|------------------------------------------|---------|--------|------|------|
| 6220916 | 7343092 | 1727648 | zinc finger protein 653                  | Zfp653  | 300446 | 1,06 | up   |
| 6379205 | 7343092 | 1727653 | zinc finger protein 653                  | Zfp653  | 300446 | 1,16 | up   |
| 6458197 | 7343092 | 1727653 | zinc finger protein 653                  | Zfp653  | 300446 | 1,31 | down |
| 6465171 | 7343092 | 1727650 | zinc finger protein 653                  | Zfp653  | 300446 | 1,21 | up   |
| 6681796 | 7343092 | 1727648 | zinc finger protein 653                  | Zfp653  | 300446 | 1,55 | down |
| 6042054 | 7180721 | 1326695 | zinc finger protein 90                   | Zfp90   | 498945 | 1,48 | up   |
| 6087238 | 7180721 | 1326698 | zinc finger protein 90                   | Zfp90   | 498945 | 2,16 | down |
| 6193465 | 7180721 | 1326697 | zinc finger protein 90                   | Zfp90   | 498945 | 1,09 | down |
| 6418058 | 7180721 | 1326696 | zinc finger protein 90                   | Zfp90   | 498945 | 1,01 | down |
| 6529421 | 7180721 | 1326698 | zinc finger protein 90                   | Zfp90   | 498945 | 1,01 | down |
| 6636023 | 7180721 | 1326695 | zinc finger protein 90                   | Zfp90   | 498945 | 1,14 | down |
| 5751567 | 7316452 | 1663531 | zinc finger protein, multitype 2         | Zfpm2   | 314930 | 1,35 | down |
| 6095491 | 7316452 | 1663605 | zinc finger protein, multitype 2         | Zfpm2   | 314930 | 1,28 | up   |
| 6132487 | 7316452 | 1663549 | zinc finger protein, multitype 2         | Zfpm2   | 314930 | 1,01 | up   |
| 6142123 | 7316452 | 1663607 | zinc finger protein, multitype 2         | Zfpm2   | 314930 | 1,05 | up   |
| 6276224 | 7316452 | 1663607 | zinc finger protein, multitype 2         | Zfpm2   | 314930 | 1,00 | up   |
| 6330512 | 7316452 | 1663556 | zinc finger protein, multitype 2         | Zfpm2   | 314930 | 1,19 | up   |
| 6420752 | 7316452 | 1663606 | zinc finger protein, multitype 2         | Zfpm2   | 314930 | 1,06 | up   |
| 6487235 | 7316452 | 1663531 | zinc finger protein, multitype 2         | Zfpm2   | 314930 | 1,25 | up   |
| 6565166 | 7316452 | 1663564 | zinc finger protein, multitype 2         | Zfpm2   | 314930 | 1,45 | up   |
| 6570025 | 7316452 | 1663580 | zinc finger protein, multitype 2         | Zfpm2   | 314930 | 2,02 | down |
| 6704713 | 7316452 | 1663607 | zinc finger protein, multitype 2         | Zfpm2   | 314930 | 1,57 | down |
| 6745660 | 7316452 | 1663607 | zinc finger protein, multitype 2         | Zfpm2   | 314930 | 1,73 | down |
| 5673588 | 7097084 | 1119951 | zinc finger with KRAB and SCAN domains 1 | Zkscan1 | 498160 | 1,35 | up   |
| 5714930 | 7097084 | 1119955 | zinc finger with KRAB and SCAN domains 1 | Zkscan1 | 498160 | 1,32 | down |
| 5786114 | 7097084 | 1119954 | zinc finger with KRAB and SCAN domains 1 | Zkscan1 | 498160 | 1,15 | up   |
| 5986965 | 7097084 | 1119949 | zinc finger with KRAB and SCAN domains 1 | Zkscan1 | 498160 | 1,26 | up   |
| 6074496 | 7097084 | 1119952 | zinc finger with KRAB and SCAN domains 1 | Zkscan1 | 498160 | 1,19 | down |
| 6266734 | 7097084 | 1119957 | zinc finger with KRAB and SCAN domains 1 | Zkscan1 | 498160 | 1,02 | down |
| 6514080 | 7097084 | 1119956 | zinc finger with KRAB and SCAN domains 1 | Zkscan1 | 498160 | 1,02 | up   |
| 6567530 | 7097084 | 1119951 | zinc finger with KRAB and SCAN domains 1 | Zkscan1 | 498160 | 1,11 | down |
| 6659632 | 7097084 | 1119950 | zinc finger with KRAB and SCAN domains 1 | Zkscan1 | 498160 | 1,10 | down |
| 5661037 | 7053926 | 1018513 | zinc finger, AN1-type domain 6           | Zfand6  | 293067 | 1,70 | up   |
| 5892637 | 7053926 | 1018511 | zinc finger, AN1-type domain 6           | Zfand6  | 293067 | 1,02 | up   |
| 6035004 | 7053926 | 1018515 | zinc finger, AN1-type domain 6           | Zfand6  | 293067 | 1,06 | down |
| 6275151 | 7053926 | 1018510 | zinc finger, AN1-type domain 6           | Zfand6  | 293067 | 1,28 | up   |
| 6562984 | 7053926 | 1018509 | zinc finger, AN1-type domain 6           | Zfand6  | 293067 | 1,27 | down |
| 6565077 | 7053926 | 1018514 | zinc finger, AN1-type domain 6           | Zfand6  | 293067 | 1,23 | up   |
| 6585325 | 7053926 | 1018514 | zinc finger, AN1-type domain 6           | Zfand6  | 293067 | 1,25 | up   |
| 6585706 | 7053926 | 1018512 | zinc finger, AN1-type domain 6           | Zfand6  | 293067 | 2,14 | down |
| 5673139 | 7098189 | 1123163 | zinc finger, CCHC domain containing 8    | Zcchc8  | 288661 | 1,57 | up   |
| 5705409 | 7098189 | 1123162 | zinc finger, CCHC domain containing 8    | Zcchc8  | 288661 | 1,02 | up   |
| 5805268 | 7098189 | 1123168 | zinc finger, CCHC domain containing 8    | Zcchc8  | 288661 | 1,08 | up   |
| 5882190 | 7098189 | 1123151 | zinc finger, CCHC domain containing 8    | Zcchc8  | 288661 | 1,07 | down |
| 5896463 | 7098189 | 1123168 | zinc finger, CCHC domain containing 8    | Zcchc8  | 288661 | 1,23 | down |
| 5918662 | 7098189 | 1123167 | zinc finger, CCHC domain containing 8    | Zcchc8  | 288661 | 1,13 | up   |
| 5946149 | 7098189 | 1123154 | zinc finger, CCHC domain containing 8    | Zcchc8  | 288661 | 1,21 | down |
| 5995121 | 7098189 | 1123157 | zinc finger, CCHC domain containing 8    | Zcchc8  | 288661 | 1,11 | up   |
| 6044421 | 7098189 | 1123159 | zinc finger, CCHC domain containing 8    | Zcchc8  | 288661 | 1,22 | down |
| 6051205 | 7098189 | 1123168 | zinc finger, CCHC domain containing 8    | Zcchc8  | 288661 | 1,49 | down |
| 6155549 | 7098189 | 1123165 | zinc finger, CCHC domain containing 8    | Zcchc8  | 288661 | 2,58 | down |
| 6190602 | 7098189 | 1123164 | zinc finger, CCHC domain containing 8    | Zcchc8  | 288661 | 1,34 | up   |
| 6259572 | 7098189 | 1123166 | zinc finger, CCHC domain containing 8    | Zcchc8  | 288661 | 1,05 | down |
| 6280300 | 7098189 | 1123158 | zinc finger, CCHC domain containing 8    | Zcchc8  | 288661 | 1,11 | down |
| 6297373 | 7098189 | 1123160 | zinc finger, CCHC domain containing 8    | Zcchc8  | 288661 | 1,39 | down |
| 6318321 | 7098189 | 1123151 | zinc finger, CCHC domain containing 8    | Zcchc8  | 288661 | 1,33 | up   |



|         |         |         |                                        |         |        |      |      |
|---------|---------|---------|----------------------------------------|---------|--------|------|------|
| 6549618 | 7098189 | 1123151 | zinc finger, CCHC domain containing 8  | Zcchc8  | 288661 | 1,20 | up   |
| 6614976 | 7098189 | 1123161 | zinc finger, CCHC domain containing 8  | Zcchc8  | 288661 | 1,14 | down |
| 6650489 | 7098189 | 1123151 | zinc finger, CCHC domain containing 8  | Zcchc8  | 288661 | 1,36 | up   |
| 5734550 | 7355244 | 1758147 | zinc finger, DBF-type containing 2     | Zdbf2   | 501153 | 1,24 | down |
| 6029294 | 7355244 | 1758146 | zinc finger, DBF-type containing 2     | Zdbf2   | 501153 | 1,12 | down |
| 6381636 | 7355244 | 1758147 | zinc finger, DBF-type containing 2     | Zdbf2   | 501153 | 1,14 | down |
| 6460805 | 7355244 | 1758146 | zinc finger, DBF-type containing 2     | Zdbf2   | 501153 | 1,01 | up   |
| 6551980 | 7355244 | 1758142 | zinc finger, DBF-type containing 2     | Zdbf2   | 501153 | 1,17 | up   |
| 6597292 | 7355244 | 1758147 | zinc finger, DBF-type containing 2     | Zdbf2   | 501153 | 1,24 | down |
| 6610285 | 7355244 | 1758147 | zinc finger, DBF-type containing 2     | Zdbf2   | 501153 | 1,12 | up   |
| 6625326 | 7355244 | 1758145 | zinc finger, DBF-type containing 2     | Zdbf2   | 501153 | 1,15 | up   |
| 6703339 | 7355244 | 1758144 | zinc finger, DBF-type containing 2     | Zdbf2   | 501153 | 1,22 | down |
| 6704586 | 7355244 | 1758147 | zinc finger, DBF-type containing 2     | Zdbf2   | 501153 | 1,00 | up   |
| 5756028 | 7288063 | 1591912 | zinc finger, DHHC-type containing 21   | Zdhhc21 | 298184 | 1,30 | down |
| 5766787 | 7288063 | 1591905 | zinc finger, DHHC-type containing 21   | Zdhhc21 | 298184 | 1,09 | up   |
| 5808835 | 7288063 | 1591904 | zinc finger, DHHC-type containing 21   | Zdhhc21 | 298184 | 1,25 | up   |
| 5811229 | 7288063 | 1591905 | zinc finger, DHHC-type containing 21   | Zdhhc21 | 298184 | 1,12 | down |
| 6003689 | 7288063 | 1591919 | zinc finger, DHHC-type containing 21   | Zdhhc21 | 298184 | 1,06 | up   |
| 6036023 | 7288063 | 1591906 | zinc finger, DHHC-type containing 21   | Zdhhc21 | 298184 | 1,45 | down |
| 6078378 | 7288063 | 1591915 | zinc finger, DHHC-type containing 21   | Zdhhc21 | 298184 | 1,04 | up   |
| 6147354 | 7288063 | 1591903 | zinc finger, DHHC-type containing 21   | Zdhhc21 | 298184 | 1,47 | down |
| 6226132 | 7288063 | 1591904 | zinc finger, DHHC-type containing 21   | Zdhhc21 | 298184 | 1,15 | down |
| 6278503 | 7288063 | 1591918 | zinc finger, DHHC-type containing 21   | Zdhhc21 | 298184 | 2,17 | up   |
| 6348783 | 7288063 | 1591919 | zinc finger, DHHC-type containing 21   | Zdhhc21 | 298184 | 1,20 | up   |
| 6404607 | 7288063 | 1591922 | zinc finger, DHHC-type containing 21   | Zdhhc21 | 298184 | 1,46 | down |
| 6463112 | 7288063 | 1591904 | zinc finger, DHHC-type containing 21   | Zdhhc21 | 298184 | 1,39 | up   |
| 6478034 | 7288063 | 1591905 | zinc finger, DHHC-type containing 21   | Zdhhc21 | 298184 | 1,03 | up   |
| 6602826 | 7288063 | 1591904 | zinc finger, DHHC-type containing 21   | Zdhhc21 | 298184 | 1,53 | down |
| 6633114 | 7288063 | 1591920 | zinc finger, DHHC-type containing 21   | Zdhhc21 | 298184 | 1,09 | down |
| 5718283 | 7088167 | 1098497 | zinc finger, DHHC-type containing 23   | Zdhhc23 | 363783 | 1,47 | down |
| 5804349 | 7088167 | 1098497 | zinc finger, DHHC-type containing 23   | Zdhhc23 | 363783 | 1,00 | up   |
| 5848295 | 7088167 | 1098498 | zinc finger, DHHC-type containing 23   | Zdhhc23 | 363783 | 1,48 | up   |
| 5935934 | 7088167 | 1098498 | zinc finger, DHHC-type containing 23   | Zdhhc23 | 363783 | 2,30 | up   |
| 6193307 | 7088167 | 1098501 | zinc finger, DHHC-type containing 23   | Zdhhc23 | 363783 | 1,16 | down |
| 6205088 | 7088167 | 1098500 | zinc finger, DHHC-type containing 23   | Zdhhc23 | 363783 | 1,10 | down |
| 6641384 | 7088167 | 1098499 | zinc finger, DHHC-type containing 23   | Zdhhc23 | 363783 | 1,30 | up   |
| 6688036 | 7088167 | 1098497 | zinc finger, DHHC-type containing 23   | Zdhhc23 | 363783 | 1,34 | down |
| 5666780 | 7120235 | 1177966 | zinc finger, FYVE domain containing 28 | Zfyve28 | 305454 | 1,05 | up   |
| 5692653 | 7120235 | 1177950 | zinc finger, FYVE domain containing 28 | Zfyve28 | 305454 | 2,27 | down |
| 5708471 | 7120235 | 1177947 | zinc finger, FYVE domain containing 28 | Zfyve28 | 305454 | 1,54 | up   |
| 5717843 | 7120235 | 1177968 | zinc finger, FYVE domain containing 28 | Zfyve28 | 305454 | 1,01 | up   |
| 5751989 | 7120235 | 1177955 | zinc finger, FYVE domain containing 28 | Zfyve28 | 305454 | 1,17 | up   |
| 5818796 | 7120235 | 1177968 | zinc finger, FYVE domain containing 28 | Zfyve28 | 305454 | 1,48 | up   |
| 5860732 | 7120235 | 1177969 | zinc finger, FYVE domain containing 28 | Zfyve28 | 305454 | 1,48 | down |
| 5954380 | 7120235 | 1177964 | zinc finger, FYVE domain containing 28 | Zfyve28 | 305454 | 1,01 | up   |
| 6003160 | 7120235 | 1177954 | zinc finger, FYVE domain containing 28 | Zfyve28 | 305454 | 1,13 | up   |
| 6012897 | 7120235 | 1177962 | zinc finger, FYVE domain containing 28 | Zfyve28 | 305454 | 1,27 | down |
| 6034986 | 7120235 | 1177965 | zinc finger, FYVE domain containing 28 | Zfyve28 | 305454 | 1,40 | up   |
| 6103247 | 7120235 | 1177949 | zinc finger, FYVE domain containing 28 | Zfyve28 | 305454 | 1,04 | up   |
| 6183058 | 7120235 | 1177948 | zinc finger, FYVE domain containing 28 | Zfyve28 | 305454 | 1,04 | down |
| 6242332 | 7120235 | 1177946 | zinc finger, FYVE domain containing 28 | Zfyve28 | 305454 | 1,31 | up   |
| 6588873 | 7120235 | 1177939 | zinc finger, FYVE domain containing 28 | Zfyve28 | 305454 | 1,24 | down |
| 6691380 | 7120235 | 1177963 | zinc finger, FYVE domain containing 28 | Zfyve28 | 305454 | 1,02 | down |
| 5728446 | 7289856 | 1596348 | zinc finger, FYVE domain containing 9  | Zfyve9  | 313477 | 1,01 | down |
| 5802008 | 7289856 | 1596360 | zinc finger, FYVE domain containing 9  | Zfyve9  | 313477 | 1,38 | up   |
| 5900842 | 7289856 | 1596352 | zinc finger, FYVE domain containing 9  | Zfyve9  | 313477 | 1,13 | up   |

|         |         |         |                                       |        |        |      |      |
|---------|---------|---------|---------------------------------------|--------|--------|------|------|
| 5972007 | 7289856 | 1596358 | zinc finger, FYVE domain containing 9 | Zfyve9 | 313477 | 1,62 | up   |
| 5976781 | 7289856 | 1596338 | zinc finger, FYVE domain containing 9 | Zfyve9 | 313477 | 2,80 | down |
| 6001364 | 7289856 | 1596336 | zinc finger, FYVE domain containing 9 | Zfyve9 | 313477 | 2,03 | down |
| 6003962 | 7289856 | 1596353 | zinc finger, FYVE domain containing 9 | Zfyve9 | 313477 | 1,53 | up   |
| 6016022 | 7289856 | 1596346 | zinc finger, FYVE domain containing 9 | Zfyve9 | 313477 | 1,09 | down |
| 6208565 | 7289856 | 1596331 | zinc finger, FYVE domain containing 9 | Zfyve9 | 313477 | 1,12 | up   |
| 6216292 | 7289856 | 1596350 | zinc finger, FYVE domain containing 9 | Zfyve9 | 313477 | 1,25 | up   |
| 6242046 | 7289856 | 1596355 | zinc finger, FYVE domain containing 9 | Zfyve9 | 313477 | 1,17 | up   |
| 6344099 | 7289856 | 1596357 | zinc finger, FYVE domain containing 9 | Zfyve9 | 313477 | 1,02 | down |
| 6366634 | 7289856 | 1596359 | zinc finger, FYVE domain containing 9 | Zfyve9 | 313477 | 1,11 | up   |
| 6391780 | 7289856 | 1596360 | zinc finger, FYVE domain containing 9 | Zfyve9 | 313477 | 1,11 | down |
| 6411680 | 7289856 | 1596341 | zinc finger, FYVE domain containing 9 | Zfyve9 | 313477 | 1,01 | up   |
| 6426004 | 7289856 | 1596349 | zinc finger, FYVE domain containing 9 | Zfyve9 | 313477 | 1,04 | up   |
| 6434893 | 7289856 | 1596350 | zinc finger, FYVE domain containing 9 | Zfyve9 | 313477 | 1,07 | up   |
| 6444414 | 7289856 | 1596330 | zinc finger, FYVE domain containing 9 | Zfyve9 | 313477 | 1,08 | down |
| 6474445 | 7289856 | 1596351 | zinc finger, FYVE domain containing 9 | Zfyve9 | 313477 | 1,21 | up   |
| 6605163 | 7289856 | 1596340 | zinc finger, FYVE domain containing 9 | Zfyve9 | 313477 | 1,03 | down |
| 6620758 | 7289856 | 1596335 | zinc finger, FYVE domain containing 9 | Zfyve9 | 313477 | 1,14 | down |
| 6648714 | 7289856 | 1596331 | zinc finger, FYVE domain containing 9 | Zfyve9 | 313477 | 1,23 | down |
| 5688200 | 7152889 | 1257370 | zinc finger, matrin type 4            | Zmat4  | 684961 | 1,05 | up   |
| 5980893 | 7152889 | 1257333 | zinc finger, matrin type 4            | Zmat4  | 684961 | 1,03 | up   |
| 6175850 | 7152889 | 1257352 | zinc finger, matrin type 4            | Zmat4  | 684961 | 1,26 | up   |
| 6255111 | 7152889 | 1257331 | zinc finger, matrin type 4            | Zmat4  | 684961 | 1,31 | down |
| 6372826 | 7152889 | 1257352 | zinc finger, matrin type 4            | Zmat4  | 684961 | 1,36 | up   |
| 6383144 | 7152889 | 1257377 | zinc finger, matrin type 4            | Zmat4  | 684961 | 1,20 | down |
| 6686382 | 7152889 | 1257360 | zinc finger, matrin type 4            | Zmat4  | 684961 | 1,10 | up   |
| 5647617 | 7142770 | 1232734 | zinc finger, MIZ-type containing 1    | Zmiz1  | 361103 | 1,00 | down |
| 5802426 | 7142770 | 1232695 | zinc finger, MIZ-type containing 1    | Zmiz1  | 361103 | 1,30 | up   |
| 5822957 | 7142770 | 1232726 | zinc finger, MIZ-type containing 1    | Zmiz1  | 361103 | 1,19 | up   |
| 5825074 | 7142770 | 1232661 | zinc finger, MIZ-type containing 1    | Zmiz1  | 361103 | 2,24 | down |
| 5907504 | 7142770 | 1232737 | zinc finger, MIZ-type containing 1    | Zmiz1  | 361103 | 1,14 | down |
| 5925097 | 7142770 | 1232715 | zinc finger, MIZ-type containing 1    | Zmiz1  | 361103 | 1,06 | up   |
| 5925966 | 7142770 | 1232735 | zinc finger, MIZ-type containing 1    | Zmiz1  | 361103 | 1,05 | down |
| 5958767 | 7142770 | 1232724 | zinc finger, MIZ-type containing 1    | Zmiz1  | 361103 | 1,01 | down |
| 5969125 | 7142770 | 1232691 | zinc finger, MIZ-type containing 1    | Zmiz1  | 361103 | 1,70 | up   |
| 6036884 | 7142770 | 1232727 | zinc finger, MIZ-type containing 1    | Zmiz1  | 361103 | 1,20 | down |
| 6088320 | 7142770 | 1232735 | zinc finger, MIZ-type containing 1    | Zmiz1  | 361103 | 1,08 | up   |
| 6099949 | 7142770 | 1232683 | zinc finger, MIZ-type containing 1    | Zmiz1  | 361103 | 1,40 | up   |
| 6128570 | 7142770 | 1232736 | zinc finger, MIZ-type containing 1    | Zmiz1  | 361103 | 1,21 | down |
| 6189208 | 7142770 | 1232719 | zinc finger, MIZ-type containing 1    | Zmiz1  | 361103 | 1,04 | up   |
| 6212059 | 7142770 | 1232731 | zinc finger, MIZ-type containing 1    | Zmiz1  | 361103 | 1,24 | down |
| 6218372 | 7142770 | 1232714 | zinc finger, MIZ-type containing 1    | Zmiz1  | 361103 | 1,04 | down |
| 6267271 | 7142770 | 1232717 | zinc finger, MIZ-type containing 1    | Zmiz1  | 361103 | 1,04 | down |
| 6304051 | 7142770 | 1232671 | zinc finger, MIZ-type containing 1    | Zmiz1  | 361103 | 1,33 | up   |
| 6363700 | 7142770 | 1232717 | zinc finger, MIZ-type containing 1    | Zmiz1  | 361103 | 1,24 | down |
| 6504618 | 7142770 | 1232732 | zinc finger, MIZ-type containing 1    | Zmiz1  | 361103 | 1,08 | up   |
| 6541333 | 7142770 | 1232728 | zinc finger, MIZ-type containing 1    | Zmiz1  | 361103 | 1,12 | down |
| 6594035 | 7142770 | 1232719 | zinc finger, MIZ-type containing 1    | Zmiz1  | 361103 | 1,07 | down |
| 6594331 | 7142770 | 1232690 | zinc finger, MIZ-type containing 1    | Zmiz1  | 361103 | 1,33 | up   |
| 6598231 | 7142770 | 1232730 | zinc finger, MIZ-type containing 1    | Zmiz1  | 361103 | 1,00 | up   |
| 6633339 | 7142770 | 1232725 | zinc finger, MIZ-type containing 1    | Zmiz1  | 361103 | 1,23 | up   |
| 6645192 | 7142770 | 1232661 | zinc finger, MIZ-type containing 1    | Zmiz1  | 361103 | 1,09 | down |
| 6657184 | 7142770 | 1232736 | zinc finger, MIZ-type containing 1    | Zmiz1  | 361103 | 1,01 | up   |
| 6690568 | 7142770 | 1232722 | zinc finger, MIZ-type containing 1    | Zmiz1  | 361103 | 1,13 | down |
| 6698451 | 7142770 | 1232729 | zinc finger, MIZ-type containing 1    | Zmiz1  | 361103 | 1,01 | down |
| 6699239 | 7142770 | 1232711 | zinc finger, MIZ-type containing 1    | Zmiz1  | 361103 | 1,32 | up   |

|         |         |         |                                        |         |        |      |      |
|---------|---------|---------|----------------------------------------|---------|--------|------|------|
| 6727439 | 7142770 | 1232721 | zinc finger, MIZ-type containing 1     | Zmiz1   | 361103 | 1,04 | down |
| 6739778 | 7142770 | 1232724 | zinc finger, MIZ-type containing 1     | Zmiz1   | 361103 | 1,06 | up   |
| 5819471 | 7291129 | 1599594 | zinc finger, MYM-type 1                | Zmym1   | 313604 | 1,08 | up   |
| 5904273 | 7291129 | 1599601 | zinc finger, MYM-type 1                | Zmym1   | 313604 | 1,09 | up   |
| 6016577 | 7291129 | 1599596 | zinc finger, MYM-type 1                | Zmym1   | 313604 | 1,03 | down |
| 6064578 | 7291129 | 1599598 | zinc finger, MYM-type 1                | Zmym1   | 313604 | 1,02 | up   |
| 6137709 | 7291129 | 1599600 | zinc finger, MYM-type 1                | Zmym1   | 313604 | 1,10 | up   |
| 6205270 | 7291129 | 1599595 | zinc finger, MYM-type 1                | Zmym1   | 313604 | 1,12 | down |
| 6329832 | 7291129 | 1599593 | zinc finger, MYM-type 1                | Zmym1   | 313604 | 1,23 | down |
| 6652778 | 7291129 | 1599602 | zinc finger, MYM-type 1                | Zmym1   | 313604 | 1,53 | down |
| 6686543 | 7291129 | 1599593 | zinc finger, MYM-type 1                | Zmym1   | 313604 | 1,19 | up   |
| 5668140 | 7382452 | 1826155 | zinc finger, MYM-type 3                | Zmym3   | 317260 | 1,20 | up   |
| 5684274 | 7382452 | 1826164 | zinc finger, MYM-type 3                | Zmym3   | 317260 | 1,48 | up   |
| 5722246 | 7382452 | 1826163 | zinc finger, MYM-type 3                | Zmym3   | 317260 | 1,20 | up   |
| 5747321 | 7382452 | 1826156 | zinc finger, MYM-type 3                | Zmym3   | 317260 | 1,05 | down |
| 5782087 | 7382452 | 1826153 | zinc finger, MYM-type 3                | Zmym3   | 317260 | 1,11 | up   |
| 5794177 | 7382452 | 1826167 | zinc finger, MYM-type 3                | Zmym3   | 317260 | 1,18 | up   |
| 5818123 | 7382452 | 1826157 | zinc finger, MYM-type 3                | Zmym3   | 317260 | 1,21 | up   |
| 5908571 | 7382452 | 1826167 | zinc finger, MYM-type 3                | Zmym3   | 317260 | 1,18 | down |
| 5979614 | 7382452 | 1826154 | zinc finger, MYM-type 3                | Zmym3   | 317260 | 1,22 | up   |
| 6030634 | 7382452 | 1826158 | zinc finger, MYM-type 3                | Zmym3   | 317260 | 1,37 | down |
| 6048506 | 7382452 | 1826164 | zinc finger, MYM-type 3                | Zmym3   | 317260 | 1,46 | up   |
| 6053244 | 7382452 | 1826162 | zinc finger, MYM-type 3                | Zmym3   | 317260 | 1,15 | down |
| 6099782 | 7382452 | 1826152 | zinc finger, MYM-type 3                | Zmym3   | 317260 | 1,24 | down |
| 6115992 | 7382452 | 1826168 | zinc finger, MYM-type 3                | Zmym3   | 317260 | 1,03 | up   |
| 6166007 | 7382452 | 1826146 | zinc finger, MYM-type 3                | Zmym3   | 317260 | 1,02 | down |
| 6209627 | 7382452 | 1826167 | zinc finger, MYM-type 3                | Zmym3   | 317260 | 1,23 | up   |
| 6243482 | 7382452 | 1826159 | zinc finger, MYM-type 3                | Zmym3   | 317260 | 1,25 | up   |
| 6261978 | 7382452 | 1826151 | zinc finger, MYM-type 3                | Zmym3   | 317260 | 1,03 | down |
| 6375118 | 7382452 | 1826160 | zinc finger, MYM-type 3                | Zmym3   | 317260 | 1,07 | up   |
| 6399520 | 7382452 | 1826146 | zinc finger, MYM-type 3                | Zmym3   | 317260 | 1,29 | down |
| 6404846 | 7382452 | 1826150 | zinc finger, MYM-type 3                | Zmym3   | 317260 | 1,02 | up   |
| 6409677 | 7382452 | 1826165 | zinc finger, MYM-type 3                | Zmym3   | 317260 | 1,06 | down |
| 6466573 | 7382452 | 1826164 | zinc finger, MYM-type 3                | Zmym3   | 317260 | 1,02 | down |
| 6477852 | 7382452 | 1826149 | zinc finger, MYM-type 3                | Zmym3   | 317260 | 1,26 | up   |
| 6518223 | 7382452 | 1826164 | zinc finger, MYM-type 3                | Zmym3   | 317260 | 1,03 | down |
| 6605082 | 7382452 | 1826167 | zinc finger, MYM-type 3                | Zmym3   | 317260 | 1,17 | down |
| 6615930 | 7382452 | 1826161 | zinc finger, MYM-type 3                | Zmym3   | 317260 | 1,16 | up   |
| 6685571 | 7382452 | 1826147 | zinc finger, MYM-type 3                | Zmym3   | 317260 | 1,14 | down |
| 6736362 | 7382452 | 1826148 | zinc finger, MYM-type 3                | Zmym3   | 317260 | 1,01 | down |
| 5683637 | 7069239 | 1054082 | zinc finger, MYND domain containing 15 | Zmynd15 | 287457 | 1,40 | down |
| 5764055 | 7069239 | 1054078 | zinc finger, MYND domain containing 15 | Zmynd15 | 287457 | 2,55 | up   |
| 5765434 | 7069239 | 1054081 | zinc finger, MYND domain containing 15 | Zmynd15 | 287457 | 2,00 | down |
| 5849275 | 7069239 | 1054079 | zinc finger, MYND domain containing 15 | Zmynd15 | 287457 | 1,32 | up   |
| 5919675 | 7069239 | 1054081 | zinc finger, MYND domain containing 15 | Zmynd15 | 287457 | 1,95 | down |
| 5974108 | 7069239 | 1054084 | zinc finger, MYND domain containing 15 | Zmynd15 | 287457 | 1,21 | up   |
| 5997259 | 7069239 | 1054082 | zinc finger, MYND domain containing 15 | Zmynd15 | 287457 | 1,20 | down |
| 6051961 | 7069239 | 1054091 | zinc finger, MYND domain containing 15 | Zmynd15 | 287457 | 1,25 | up   |
| 6074128 | 7069239 | 1054092 | zinc finger, MYND domain containing 15 | Zmynd15 | 287457 | 2,27 | down |
| 6084531 | 7069239 | 1054089 | zinc finger, MYND domain containing 15 | Zmynd15 | 287457 | 1,16 | down |
| 6180567 | 7069239 | 1054091 | zinc finger, MYND domain containing 15 | Zmynd15 | 287457 | 1,46 | up   |
| 6183974 | 7069239 | 1054086 | zinc finger, MYND domain containing 15 | Zmynd15 | 287457 | 1,65 | down |
| 6237923 | 7069239 | 1054087 | zinc finger, MYND domain containing 15 | Zmynd15 | 287457 | 1,48 | up   |
| 6323086 | 7069239 | 1054083 | zinc finger, MYND domain containing 15 | Zmynd15 | 287457 | 1,68 | up   |
| 6413966 | 7069239 | 1054088 | zinc finger, MYND domain containing 15 | Zmynd15 | 287457 | 2,20 | up   |
| 6520786 | 7069239 | 1054080 | zinc finger, MYND domain containing 15 | Zmynd15 | 287457 | 1,02 | down |

|         |         |         |                                            |         |        |      |      |
|---------|---------|---------|--------------------------------------------|---------|--------|------|------|
| 6524753 | 7069239 | 1054082 | zinc finger, MYND domain containing 15     | Zmynd15 | 287457 | 1,01 | down |
| 6703629 | 7069239 | 1054085 | zinc finger, MYND domain containing 15     | Zmynd15 | 287457 | 2,37 | up   |
| 6724150 | 7069239 | 1054090 | zinc finger, MYND domain containing 15     | Zmynd15 | 287457 | 1,43 | up   |
| 5621785 | 7179859 | 1324615 | zinc finger, SWIM-type containing 4        | Zswim4  | 304655 | 1,00 | up   |
| 5733962 | 7179859 | 1324618 | zinc finger, SWIM-type containing 4        | Zswim4  | 304655 | 1,45 | up   |
| 5772520 | 7179859 | 1324610 | zinc finger, SWIM-type containing 4        | Zswim4  | 304655 | 1,08 | down |
| 5879844 | 7179859 | 1324607 | zinc finger, SWIM-type containing 4        | Zswim4  | 304655 | 1,60 | up   |
| 5976754 | 7179859 | 1324618 | zinc finger, SWIM-type containing 4        | Zswim4  | 304655 | 1,48 | up   |
| 5996820 | 7179859 | 1324611 | zinc finger, SWIM-type containing 4        | Zswim4  | 304655 | 1,03 | down |
| 6079091 | 7179859 | 1324614 | zinc finger, SWIM-type containing 4        | Zswim4  | 304655 | 1,22 | up   |
| 6095844 | 7179859 | 1324613 | zinc finger, SWIM-type containing 4        | Zswim4  | 304655 | 1,54 | down |
| 6148513 | 7179859 | 1324609 | zinc finger, SWIM-type containing 4        | Zswim4  | 304655 | 1,76 | up   |
| 6229663 | 7179859 | 1324611 | zinc finger, SWIM-type containing 4        | Zswim4  | 304655 | 1,79 | down |
| 6434800 | 7179859 | 1324616 | zinc finger, SWIM-type containing 4        | Zswim4  | 304655 | 1,23 | up   |
| 6447557 | 7179859 | 1324611 | zinc finger, SWIM-type containing 4        | Zswim4  | 304655 | 1,59 | down |
| 6466339 | 7179859 | 1324605 | zinc finger, SWIM-type containing 4        | Zswim4  | 304655 | 1,09 | down |
| 6531981 | 7179859 | 1324618 | zinc finger, SWIM-type containing 4        | Zswim4  | 304655 | 1,08 | up   |
| 6593485 | 7179859 | 1324608 | zinc finger, SWIM-type containing 4        | Zswim4  | 304655 | 3,07 | down |
| 6635207 | 7179859 | 1324604 | zinc finger, SWIM-type containing 4        | Zswim4  | 304655 | 4,14 | down |
| 6645767 | 7179859 | 1324612 | zinc finger, SWIM-type containing 4        | Zswim4  | 304655 | 1,17 | up   |
| 6663316 | 7179859 | 1324617 | zinc finger, SWIM-type containing 4        | Zswim4  | 304655 | 1,54 | up   |
| 5620347 | 7069464 | 1054638 | zinc finger, ZZ-type with EF hand domain 1 | Zzef1   | 287476 | 1,12 | up   |
| 5666231 | 7069464 | 1054673 | zinc finger, ZZ-type with EF hand domain 1 | Zzef1   | 287476 | 1,03 | up   |
| 5671815 | 7069464 | 1054618 | zinc finger, ZZ-type with EF hand domain 1 | Zzef1   | 287476 | 1,09 | up   |
| 5677041 | 7069464 | 1054614 | zinc finger, ZZ-type with EF hand domain 1 | Zzef1   | 287476 | 1,10 | down |
| 5686466 | 7069464 | 1054618 | zinc finger, ZZ-type with EF hand domain 1 | Zzef1   | 287476 | 1,12 | up   |
| 5690569 | 7069464 | 1054633 | zinc finger, ZZ-type with EF hand domain 1 | Zzef1   | 287476 | 1,07 | down |
| 5746488 | 7069464 | 1054645 | zinc finger, ZZ-type with EF hand domain 1 | Zzef1   | 287476 | 1,39 | down |
| 5894730 | 7069464 | 1054656 | zinc finger, ZZ-type with EF hand domain 1 | Zzef1   | 287476 | 1,23 | up   |
| 5904884 | 7069464 | 1054619 | zinc finger, ZZ-type with EF hand domain 1 | Zzef1   | 287476 | 1,22 | up   |
| 5906904 | 7069464 | 1054675 | zinc finger, ZZ-type with EF hand domain 1 | Zzef1   | 287476 | 1,11 | up   |
| 5926574 | 7069464 | 1054657 | zinc finger, ZZ-type with EF hand domain 1 | Zzef1   | 287476 | 1,42 | up   |
| 5932010 | 7069464 | 1054646 | zinc finger, ZZ-type with EF hand domain 1 | Zzef1   | 287476 | 1,03 | down |
| 5932060 | 7069464 | 1054662 | zinc finger, ZZ-type with EF hand domain 1 | Zzef1   | 287476 | 1,15 | down |
| 5935180 | 7069464 | 1054664 | zinc finger, ZZ-type with EF hand domain 1 | Zzef1   | 287476 | 1,05 | down |
| 5936139 | 7069464 | 1054659 | zinc finger, ZZ-type with EF hand domain 1 | Zzef1   | 287476 | 1,08 | up   |
| 5936146 | 7069464 | 1054631 | zinc finger, ZZ-type with EF hand domain 1 | Zzef1   | 287476 | 1,00 | down |
| 5944481 | 7069464 | 1054614 | zinc finger, ZZ-type with EF hand domain 1 | Zzef1   | 287476 | 1,08 | up   |
| 5956117 | 7069464 | 1054610 | zinc finger, ZZ-type with EF hand domain 1 | Zzef1   | 287476 | 1,02 | up   |
| 5971028 | 7069464 | 1054634 | zinc finger, ZZ-type with EF hand domain 1 | Zzef1   | 287476 | 1,07 | down |
| 5994784 | 7069464 | 1054621 | zinc finger, ZZ-type with EF hand domain 1 | Zzef1   | 287476 | 1,19 | down |
| 6004135 | 7069464 | 1054663 | zinc finger, ZZ-type with EF hand domain 1 | Zzef1   | 287476 | 1,09 | up   |
| 6024891 | 7069464 | 1054667 | zinc finger, ZZ-type with EF hand domain 1 | Zzef1   | 287476 | 1,42 | down |
| 6053764 | 7069464 | 1054668 | zinc finger, ZZ-type with EF hand domain 1 | Zzef1   | 287476 | 1,07 | up   |
| 6059786 | 7069464 | 1054637 | zinc finger, ZZ-type with EF hand domain 1 | Zzef1   | 287476 | 1,56 | down |
| 6061823 | 7069464 | 1054632 | zinc finger, ZZ-type with EF hand domain 1 | Zzef1   | 287476 | 1,05 | down |
| 6093256 | 7069464 | 1054641 | zinc finger, ZZ-type with EF hand domain 1 | Zzef1   | 287476 | 1,32 | up   |
| 6109711 | 7069464 | 1054620 | zinc finger, ZZ-type with EF hand domain 1 | Zzef1   | 287476 | 1,00 | up   |
| 6116128 | 7069464 | 1054630 | zinc finger, ZZ-type with EF hand domain 1 | Zzef1   | 287476 | 1,08 | up   |
| 6123030 | 7069464 | 1054676 | zinc finger, ZZ-type with EF hand domain 1 | Zzef1   | 287476 | 1,12 | up   |
| 6150817 | 7069464 | 1054639 | zinc finger, ZZ-type with EF hand domain 1 | Zzef1   | 287476 | 1,05 | down |
| 6191972 | 7069464 | 1054625 | zinc finger, ZZ-type with EF hand domain 1 | Zzef1   | 287476 | 1,09 | up   |
| 6249516 | 7069464 | 1054623 | zinc finger, ZZ-type with EF hand domain 1 | Zzef1   | 287476 | 1,00 | up   |
| 6267742 | 7069464 | 1054619 | zinc finger, ZZ-type with EF hand domain 1 | Zzef1   | 287476 | 1,09 | down |
| 6269960 | 7069464 | 1054650 | zinc finger, ZZ-type with EF hand domain 1 | Zzef1   | 287476 | 1,07 | up   |
| 6272315 | 7069464 | 1054659 | zinc finger, ZZ-type with EF hand domain 1 | Zzef1   | 287476 | 1,35 | down |

|         |         |         |                                            |       |        |      |      |
|---------|---------|---------|--------------------------------------------|-------|--------|------|------|
| 6289383 | 7069464 | 1054626 | zinc finger, ZZ-type with EF hand domain 1 | Zzef1 | 287476 | 1,22 | up   |
| 6294135 | 7069464 | 1054652 | zinc finger, ZZ-type with EF hand domain 1 | Zzef1 | 287476 | 1,07 | up   |
| 6327564 | 7069464 | 1054656 | zinc finger, ZZ-type with EF hand domain 1 | Zzef1 | 287476 | 1,09 | down |
| 6338946 | 7069464 | 1054660 | zinc finger, ZZ-type with EF hand domain 1 | Zzef1 | 287476 | 1,25 | down |
| 6339849 | 7069464 | 1054669 | zinc finger, ZZ-type with EF hand domain 1 | Zzef1 | 287476 | 1,16 | down |
| 6340446 | 7069464 | 1054636 | zinc finger, ZZ-type with EF hand domain 1 | Zzef1 | 287476 | 1,12 | up   |
| 6347790 | 7069464 | 1054665 | zinc finger, ZZ-type with EF hand domain 1 | Zzef1 | 287476 | 1,22 | up   |
| 6358623 | 7069464 | 1054635 | zinc finger, ZZ-type with EF hand domain 1 | Zzef1 | 287476 | 1,06 | up   |
| 6400041 | 7069464 | 1054647 | zinc finger, ZZ-type with EF hand domain 1 | Zzef1 | 287476 | 1,22 | down |
| 6416556 | 7069464 | 1054661 | zinc finger, ZZ-type with EF hand domain 1 | Zzef1 | 287476 | 1,24 | down |
| 6435079 | 7069464 | 1054653 | zinc finger, ZZ-type with EF hand domain 1 | Zzef1 | 287476 | 1,13 | down |
| 6441397 | 7069464 | 1054633 | zinc finger, ZZ-type with EF hand domain 1 | Zzef1 | 287476 | 1,01 | up   |
| 6478027 | 7069464 | 1054637 | zinc finger, ZZ-type with EF hand domain 1 | Zzef1 | 287476 | 1,33 | down |
| 6515866 | 7069464 | 1054654 | zinc finger, ZZ-type with EF hand domain 1 | Zzef1 | 287476 | 1,07 | up   |
| 6529505 | 7069464 | 1054674 | zinc finger, ZZ-type with EF hand domain 1 | Zzef1 | 287476 | 1,12 | down |
| 6540288 | 7069464 | 1054624 | zinc finger, ZZ-type with EF hand domain 1 | Zzef1 | 287476 | 1,12 | up   |
| 6541845 | 7069464 | 1054616 | zinc finger, ZZ-type with EF hand domain 1 | Zzef1 | 287476 | 1,08 | up   |
| 6545449 | 7069464 | 1054642 | zinc finger, ZZ-type with EF hand domain 1 | Zzef1 | 287476 | 1,08 | up   |
| 6559989 | 7069464 | 1054617 | zinc finger, ZZ-type with EF hand domain 1 | Zzef1 | 287476 | 1,28 | up   |
| 6567789 | 7069464 | 1054615 | zinc finger, ZZ-type with EF hand domain 1 | Zzef1 | 287476 | 1,23 | up   |
| 6576852 | 7069464 | 1054651 | zinc finger, ZZ-type with EF hand domain 1 | Zzef1 | 287476 | 1,03 | down |
| 6607304 | 7069464 | 1054644 | zinc finger, ZZ-type with EF hand domain 1 | Zzef1 | 287476 | 1,41 | up   |
| 6608587 | 7069464 | 1054658 | zinc finger, ZZ-type with EF hand domain 1 | Zzef1 | 287476 | 1,01 | down |
| 6633644 | 7069464 | 1054655 | zinc finger, ZZ-type with EF hand domain 1 | Zzef1 | 287476 | 1,45 | down |
| 6706667 | 7069464 | 1054628 | zinc finger, ZZ-type with EF hand domain 1 | Zzef1 | 287476 | 1,01 | down |
| 6715548 | 7069464 | 1054648 | zinc finger, ZZ-type with EF hand domain 1 | Zzef1 | 287476 | 1,00 | up   |
| 6721349 | 7069464 | 1054632 | zinc finger, ZZ-type with EF hand domain 1 | Zzef1 | 287476 | 1,41 | up   |
| 6732792 | 7069464 | 1054610 | zinc finger, ZZ-type with EF hand domain 1 | Zzef1 | 287476 | 1,31 | up   |
| 6741715 | 7069464 | 1054629 | zinc finger, ZZ-type with EF hand domain 1 | Zzef1 | 287476 | 1,04 | down |
| 6741920 | 7069464 | 1054643 | zinc finger, ZZ-type with EF hand domain 1 | Zzef1 | 287476 | 1,13 | down |
| 6073033 | 7216356 | 1413828 | zinc ribbon domain containing, 1           | Znrd1 | 361784 | 2,24 | down |
| 6144663 | 7216356 | 1413831 | zinc ribbon domain containing, 1           | Znrd1 | 361784 | 1,52 | down |
| 6334841 | 7216356 | 1413829 | zinc ribbon domain containing, 1           | Znrd1 | 361784 | 1,18 | up   |
| 6416025 | 7216356 | 1413830 | zinc ribbon domain containing, 1           | Znrd1 | 361784 | 1,13 | up   |
| 6465603 | 7216356 | 1413828 | zinc ribbon domain containing, 1           | Znrd1 | 361784 | 1,09 | up   |
| 5647122 | 7071880 | 1060718 | zona pellucida binding protein 2           | Zpbp2 | 363676 | 1,25 | down |
| 5909679 | 7071880 | 1060721 | zona pellucida binding protein 2           | Zpbp2 | 363676 | 1,23 | up   |
| 6054235 | 7071880 | 1060721 | zona pellucida binding protein 2           | Zpbp2 | 363676 | 1,12 | down |
| 6090140 | 7071880 | 1060716 | zona pellucida binding protein 2           | Zpbp2 | 363676 | 2,23 | down |
| 6199691 | 7071880 | 1060723 | zona pellucida binding protein 2           | Zpbp2 | 363676 | 1,26 | up   |
| 6314079 | 7071880 | 1060722 | zona pellucida binding protein 2           | Zpbp2 | 363676 | 1,51 | down |
| 6384313 | 7071880 | 1060717 | zona pellucida binding protein 2           | Zpbp2 | 363676 | 1,31 | up   |
| 6391343 | 7071880 | 1060720 | zona pellucida binding protein 2           | Zpbp2 | 363676 | 1,36 | up   |
| 6578113 | 7071880 | 1060715 | zona pellucida binding protein 2           | Zpbp2 | 363676 | 1,53 | down |
| 6656984 | 7071880 | 1060719 | zona pellucida binding protein 2           | Zpbp2 | 363676 | 1,02 | down |
| 5864508 | 7125074 | 1189425 | zygote arrest 1                            | Zar1  | 353228 | 1,39 | up   |
| 5972304 | 7125074 | 1189428 | zygote arrest 1                            | Zar1  | 353228 | 1,39 | down |
| 6168258 | 7125074 | 1189428 | zygote arrest 1                            | Zar1  | 353228 | 1,03 | down |
| 6201799 | 7125074 | 1189427 | zygote arrest 1                            | Zar1  | 353228 | 3,48 | up   |
| 6239617 | 7125074 | 1189426 | zygote arrest 1                            | Zar1  | 353228 | 1,32 | down |
| 6329487 | 7125074 | 1189428 | zygote arrest 1                            | Zar1  | 353228 | 1,24 | up   |
| 6350699 | 7125074 | 1189428 | zygote arrest 1                            | Zar1  | 353228 | 1,16 | up   |
| 6482324 | 7125074 | 1189424 | zygote arrest 1                            | Zar1  | 353228 | 1,26 | down |
| 5617710 | 7249503 | 1496166 | ---                                        | ---   | ---    | 1,01 | up   |
| 5617745 | 7087492 | 1096703 | ---                                        | ---   | ---    | 1,08 | down |
| 5617762 | 7231650 | 1451836 | ---                                        | ---   | ---    | 1,00 | up   |

|         |         |         |     |     |     |      |      |
|---------|---------|---------|-----|-----|-----|------|------|
| 5617904 | 7156372 | 1266708 | --- | --- | --- | 1,74 | up   |
| 5617996 | 7345882 | 1734810 | --- | --- | --- | 1,01 | up   |
| 5618045 | 7303616 | 1631356 | --- | --- | --- | 1,01 | down |
| 5618065 | 7277783 | 1567458 | --- | --- | --- | 1,78 | down |
| 5618221 | 7069830 | 1055605 | --- | --- | --- | 1,30 | down |
| 5618347 | 7199476 | 1374551 | --- | --- | --- | 1,12 | down |
| 5618404 | 7312903 | 1654098 | --- | --- | --- | 1,37 | down |
| 5618445 | 7161841 | 1279873 | --- | --- | --- | 1,38 | down |
| 5618561 | 7033504 | 969851  | --- | --- | --- | 2,28 | down |
| 5618568 | 7155286 | 1263908 | --- | --- | --- | 1,41 | down |
| 5618616 | 7194172 | 1361183 | --- | --- | --- | 1,71 | up   |
| 5618647 | 7248790 | 1494514 | --- | --- | --- | 1,22 | up   |
| 5618826 | 7032204 | 966153  | --- | --- | --- | 1,12 | up   |
| 5619121 | 7276231 | 1563086 | --- | --- | --- | 1,82 | up   |
| 5619216 | 7330396 | 1696351 | --- | --- | --- | 1,13 | up   |
| 5619249 | 7050167 | 1009800 | --- | --- | --- | 1,05 | down |
| 5619260 | 7245695 | 1487063 | --- | --- | --- | 1,24 | down |
| 5619357 | 7338807 | 1716783 | --- | --- | --- | 1,12 | up   |
| 5619427 | 7145669 | 1240012 | --- | --- | --- | 1,08 | up   |
| 5619464 | 7069253 | 1054169 | --- | --- | --- | 1,26 | up   |
| 5619566 | 7067614 | 1050196 | --- | --- | --- | 1,38 | up   |
| 5619577 | 7198210 | 1370983 | --- | --- | --- | 1,06 | down |
| 5619760 | 7332970 | 1702533 | --- | --- | --- | 1,56 | up   |
| 5619897 | 7341253 | 1723271 | --- | --- | --- | 1,36 | down |
| 5620076 | 7031774 | 964650  | --- | --- | --- | 1,36 | down |
| 5620087 | 7162144 | 1280508 | --- | --- | --- | 1,32 | up   |
| 5620157 | 7216309 | 1413743 | --- | --- | --- | 1,09 | down |
| 5620192 | 7189689 | 1349029 | --- | --- | --- | 1,24 | down |
| 5620234 | 7264085 | 1532719 | --- | --- | --- | 1,34 | up   |
| 5620292 | 7281507 | 1576711 | --- | --- | --- | 1,19 | up   |
| 5620344 | 7119556 | 1176078 | --- | --- | --- | 1,10 | up   |
| 5620365 | 7036870 | 977869  | --- | --- | --- | 1,32 | up   |
| 5620367 | 7181193 | 1328288 | --- | --- | --- | 1,10 | up   |
| 5620398 | 7323545 | 1679988 | --- | --- | --- | 1,09 | down |
| 5620407 | 7197820 | 1370100 | --- | --- | --- | 1,50 | down |
| 5620500 | 7336931 | 1711859 | --- | --- | --- | 1,07 | down |
| 5620552 | 7355220 | 1758098 | --- | --- | --- | 1,16 | up   |
| 5620664 | 7305674 | 1636846 | --- | --- | --- | 1,05 | up   |
| 5620711 | 7341397 | 1723651 | --- | --- | --- | 1,01 | down |
| 5620934 | 7320337 | 1673337 | --- | --- | --- | 1,03 | up   |
| 5620938 | 7082098 | 1084111 | --- | --- | --- | 1,25 | down |
| 5621021 | 7331829 | 1700188 | --- | --- | --- | 1,04 | down |
| 5621054 | 7344702 | 1732139 | --- | --- | --- | 1,24 | up   |
| 5621086 | 7088164 | 1098479 | --- | --- | --- | 1,15 | down |
| 5621234 | 7248790 | 1494521 | --- | --- | --- | 1,02 | up   |
| 5621254 | 7373038 | 1804287 | --- | --- | --- | 1,36 | up   |
| 5621449 | 7274892 | 1559542 | --- | --- | --- | 2,33 | down |
| 5621523 | 7088164 | 1098487 | --- | --- | --- | 1,06 | down |
| 5621658 | 7342959 | 1727344 | --- | --- | --- | 1,85 | down |
| 5621695 | 7146093 | 1240914 | --- | --- | --- | 1,06 | up   |
| 5621701 | 7279533 | 1571916 | --- | --- | --- | 1,01 | up   |
| 5621702 | 7274780 | 1559198 | --- | --- | --- | 1,78 | up   |
| 5621850 | 7156114 | 1266054 | --- | --- | --- | 1,00 | up   |
| 5621871 | 7331719 | 1699914 | --- | --- | --- | 1,52 | down |
| 5621902 | 7183927 | 1335497 | --- | --- | --- | 1,20 | down |
| 5622073 | 7193056 | 1358258 | --- | --- | --- | 1,10 | up   |

|         |         |         |     |     |     |      |      |
|---------|---------|---------|-----|-----|-----|------|------|
| 5622167 | 7206133 | 1389965 | --- | --- | --- | 1,09 | down |
| 5622283 | 7290921 | 1599078 | --- | --- | --- | 1,12 | up   |
| 5622358 | 7385253 | 1832225 | --- | --- | --- | 1,16 | down |
| 5622372 | 7331297 | 1698816 | --- | --- | --- | 1,34 | down |
| 5622387 | 7070836 | 1058357 | --- | --- | --- | 1,28 | down |
| 5622401 | 7159642 | 1274217 | --- | --- | --- | 1,05 | down |
| 5622412 | 7344702 | 1732141 | --- | --- | --- | 1,26 | up   |
| 5622617 | 7284359 | 1583434 | --- | --- | --- | 1,55 | up   |
| 5622661 | 7240569 | 1475456 | --- | --- | --- | 1,00 | up   |
| 5622686 | 7344702 | 1732146 | --- | --- | --- | 1,26 | down |
| 5622833 | 7038316 | 981460  | --- | --- | --- | 1,22 | up   |
| 5622940 | 7244290 | 1484168 | --- | --- | --- | 1,30 | up   |
| 5622992 | 7146093 | 1240942 | --- | --- | --- | 1,23 | up   |
| 5622995 | 7290921 | 1599078 | --- | --- | --- | 1,03 | down |
| 5623063 | 7239752 | 1473157 | --- | --- | --- | 1,17 | down |
| 5623080 | 7050780 | 1011381 | --- | --- | --- | 2,27 | up   |
| 5623091 | 7292517 | 1602534 | --- | --- | --- | 1,29 | up   |
| 5623217 | 7321029 | 1674832 | --- | --- | --- | 1,65 | up   |
| 5623366 | 7230611 | 1448822 | --- | --- | --- | 1,02 | down |
| 5623433 | 7050930 | 1011630 | --- | --- | --- | 1,23 | up   |
| 5623454 | 7080106 | 1079715 | --- | --- | --- | 1,27 | up   |
| 5623583 | 7127257 | 1194813 | --- | --- | --- | 1,87 | down |
| 5623626 | 7323545 | 1679977 | --- | --- | --- | 1,11 | down |
| 5623706 | 7339379 | 1718319 | --- | --- | --- | 1,00 | up   |
| 5623745 | 7234434 | 1459439 | --- | --- | --- | 1,45 | down |
| 5623904 | 7030224 | 961115  | --- | --- | --- | 1,14 | up   |
| 5623919 | 7119930 | 1177213 | --- | --- | --- | 1,16 | down |
| 5624034 | 7071714 | 1060365 | --- | --- | --- | 1,00 | up   |
| 5624037 | 7356115 | 1760119 | --- | --- | --- | 1,25 | up   |
| 5624114 | 7359453 | 1768450 | --- | --- | --- | 1,10 | down |
| 5624328 | 7371253 | 1799562 | --- | --- | --- | 1,04 | up   |
| 5624364 | 7064134 | 1041461 | --- | --- | --- | 1,13 | down |
| 5624524 | 7190844 | 1352151 | --- | --- | --- | 1,22 | up   |
| 5624570 | 7143455 | 1234717 | --- | --- | --- | 1,01 | up   |
| 5624737 | 7248964 | 1494941 | --- | --- | --- | 1,14 | up   |
| 5624758 | 7239752 | 1473194 | --- | --- | --- | 1,38 | up   |
| 5624827 | 7334347 | 1705749 | --- | --- | --- | 1,11 | down |
| 5624866 | 7217679 | 1417300 | --- | --- | --- | 1,74 | down |
| 5624892 | 7061550 | 1035288 | --- | --- | --- | 1,31 | down |
| 5624893 | 7217679 | 1417303 | --- | --- | --- | 1,20 | down |
| 5624921 | 7156052 | 1265744 | --- | --- | --- | 1,16 | up   |
| 5625111 | 7033451 | 969772  | --- | --- | --- | 1,23 | up   |
| 5625112 | 7243130 | 1480851 | --- | --- | --- | 1,16 | up   |
| 5625133 | 7249503 | 1496217 | --- | --- | --- | 1,03 | down |
| 5625285 | 7139708 | 1225066 | --- | --- | --- | 1,33 | up   |
| 5625301 | 7100976 | 1129872 | --- | --- | --- | 1,16 | down |
| 5625398 | 7097680 | 1121728 | --- | --- | --- | 1,46 | up   |
| 5625416 | 7339379 | 1718363 | --- | --- | --- | 1,27 | down |
| 5625644 | 7078666 | 1076548 | --- | --- | --- | 1,40 | down |
| 5625671 | 7276762 | 1564513 | --- | --- | --- | 1,01 | up   |
| 5625690 | 7330396 | 1696347 | --- | --- | --- | 1,18 | up   |
| 5625776 | 7233440 | 1456833 | --- | --- | --- | 1,88 | down |
| 5625804 | 7271213 | 1550633 | --- | --- | --- | 2,25 | up   |
| 5625948 | 7049399 | 1008333 | --- | --- | --- | 1,04 | up   |
| 5625957 | 7030518 | 961681  | --- | --- | --- | 2,18 | up   |
| 5626074 | 7257976 | 1517712 | --- | --- | --- | 1,01 | down |

|         |         |         |     |     |     |      |      |
|---------|---------|---------|-----|-----|-----|------|------|
| 5626080 | 7056333 | 1023678 | --- | --- | --- | 1,47 | down |
| 5626153 | 7027728 | 956032  | --- | --- | --- | 1,07 | down |
| 5626268 | 7384365 | 1830281 | --- | --- | --- | 1,59 | up   |
| 5626314 | 7333333 | 1703386 | --- | --- | --- | 1,10 | down |
| 5626450 | 7229886 | 1447158 | --- | --- | --- | 1,03 | up   |
| 5626638 | 7091954 | 1107708 | --- | --- | --- | 1,05 | down |
| 5626676 | 7253408 | 1505957 | --- | --- | --- | 1,14 | down |
| 5626703 | 7312575 | 1653359 | --- | --- | --- | 1,51 | down |
| 5626836 | 7112570 | 1158682 | --- | --- | --- | 1,30 | up   |
| 5627020 | 7098366 | 1123627 | --- | --- | --- | 1,12 | up   |
| 5627053 | 7199476 | 1374570 | --- | --- | --- | 1,55 | down |
| 5627186 | 7034532 | 972657  | --- | --- | --- | 1,01 | up   |
| 5627207 | 7067828 | 1050784 | --- | --- | --- | 1,02 | up   |
| 5627226 | 7063839 | 1040578 | --- | --- | --- | 3,07 | down |
| 5627272 | 7196029 | 1365612 | --- | --- | --- | 3,14 | down |
| 5627278 | 7224035 | 1432383 | --- | --- | --- | 1,15 | up   |
| 5627285 | 7368613 | 1791619 | --- | --- | --- | 2,41 | up   |
| 5627387 | 7112225 | 1157602 | --- | --- | --- | 1,08 | down |
| 5627501 | 7235069 | 1460973 | --- | --- | --- | 2,31 | down |
| 5627623 | 7297589 | 1615687 | --- | --- | --- | 1,07 | up   |
| 5627674 | 7070616 | 1057787 | --- | --- | --- | 1,09 | up   |
| 5627810 | 7269641 | 1546252 | --- | --- | --- | 1,14 | up   |
| 5627842 | 7119930 | 1177216 | --- | --- | --- | 1,03 | down |
| 5628025 | 7112566 | 1158641 | --- | --- | --- | 1,04 | up   |
| 5628194 | 7267802 | 1541800 | --- | --- | --- | 1,19 | down |
| 5628229 | 7050167 | 1009800 | --- | --- | --- | 1,41 | up   |
| 5628343 | 7052385 | 1014770 | --- | --- | --- | 1,04 | up   |
| 5628536 | 7240569 | 1475362 | --- | --- | --- | 1,02 | down |
| 5628575 | 7098867 | 1124952 | --- | --- | --- | 1,28 | up   |
| 5628662 | 7198210 | 1370993 | --- | --- | --- | 1,33 | down |
| 5628715 | 7039223 | 983562  | --- | --- | --- | 1,19 | up   |
| 5628743 | 7303616 | 1631325 | --- | --- | --- | 1,39 | down |
| 5628750 | 7031774 | 964729  | --- | --- | --- | 1,25 | up   |
| 5628928 | 7188638 | 1346187 | --- | --- | --- | 1,15 | up   |
| 5629236 | 7099650 | 1126880 | --- | --- | --- | 3,43 | down |
| 5629281 | 7380497 | 1821840 | --- | --- | --- | 1,24 | down |
| 5629395 | 7299512 | 1620558 | --- | --- | --- | 1,06 | up   |
| 5629400 | 7182056 | 1330595 | --- | --- | --- | 2,01 | down |
| 5629461 | 7140113 | 1226059 | --- | --- | --- | 1,77 | down |
| 5629478 | 7217679 | 1417292 | --- | --- | --- | 1,34 | up   |
| 5629543 | 7131889 | 1206086 | --- | --- | --- | 1,78 | up   |
| 5629610 | 7311367 | 1650729 | --- | --- | --- | 2,07 | up   |
| 5629618 | 7035414 | 974468  | --- | --- | --- | 1,54 | down |
| 5629664 | 7221420 | 1426253 | --- | --- | --- | 1,99 | up   |
| 5629793 | 7052385 | 1014797 | --- | --- | --- | 1,46 | up   |
| 5629832 | 7050726 | 1011270 | --- | --- | --- | 1,13 | up   |
| 5629887 | 7139708 | 1225062 | --- | --- | --- | 1,04 | down |
| 5629993 | 7231835 | 1452294 | --- | --- | --- | 1,19 | up   |
| 5630020 | 7181442 | 1328882 | --- | --- | --- | 1,15 | down |
| 5630230 | 7376820 | 1813396 | --- | --- | --- | 1,71 | down |
| 5630400 | 7060851 | 1033411 | --- | --- | --- | 1,07 | down |
| 5630407 | 7279499 | 1571823 | --- | --- | --- | 1,04 | up   |
| 5630432 | 7058713 | 1028666 | --- | --- | --- | 1,06 | down |
| 5630501 | 7114108 | 1162441 | --- | --- | --- | 1,01 | up   |
| 5630531 | 7070616 | 1057784 | --- | --- | --- | 1,23 | up   |
| 5630581 | 7174149 | 1310509 | --- | --- | --- | 1,19 | down |



|         |         |         |     |     |     |      |      |
|---------|---------|---------|-----|-----|-----|------|------|
| 5630800 | 7191594 | 1354170 | --- | --- | --- | 1,79 | up   |
| 5630978 | 7049332 | 1008176 | --- | --- | --- | 1,18 | down |
| 5631042 | 7267953 | 1542231 | --- | --- | --- | 1,05 | up   |
| 5631045 | 7087492 | 1096708 | --- | --- | --- | 1,10 | down |
| 5631298 | 7088164 | 1098473 | --- | --- | --- | 1,73 | down |
| 5631337 | 7237719 | 1467515 | --- | --- | --- | 1,03 | up   |
| 5631410 | 7059766 | 1030973 | --- | --- | --- | 1,39 | up   |
| 5631420 | 7102369 | 1133435 | --- | --- | --- | 1,15 | down |
| 5631461 | 7131360 | 1204991 | --- | --- | --- | 1,31 | down |
| 5631514 | 7113984 | 1162230 | --- | --- | --- | 1,12 | up   |
| 5631567 | 7068853 | 1053104 | --- | --- | --- | 1,04 | down |
| 5631654 | 7349946 | 1744950 | --- | --- | --- | 1,12 | down |
| 5631694 | 7258784 | 1519669 | --- | --- | --- | 1,58 | down |
| 5631707 | 7284501 | 1583863 | --- | --- | --- | 1,06 | down |
| 5631754 | 7294221 | 1606734 | --- | --- | --- | 2,04 | up   |
| 5631854 | 7246570 | 1489217 | --- | --- | --- | 1,27 | up   |
| 5631873 | 7213908 | 1407645 | --- | --- | --- | 1,24 | down |
| 5631889 | 7210387 | 1400039 | --- | --- | --- | 1,17 | down |
| 5632051 | 7149817 | 1250316 | --- | --- | --- | 1,12 | down |
| 5632093 | 7052385 | 1014776 | --- | --- | --- | 1,11 | up   |
| 5632127 | 7368004 | 1789332 | --- | --- | --- | 1,40 | up   |
| 5632144 | 7112225 | 1157591 | --- | --- | --- | 1,02 | up   |
| 5632247 | 7169732 | 1298780 | --- | --- | --- | 1,15 | up   |
| 5632285 | 7198210 | 1370959 | --- | --- | --- | 1,10 | up   |
| 5632305 | 7132125 | 1206623 | --- | --- | --- | 1,00 | up   |
| 5632368 | 7331434 | 1699203 | --- | --- | --- | 1,14 | down |
| 5632437 | 7236358 | 1464240 | --- | --- | --- | 1,07 | up   |
| 5632624 | 7318143 | 1668091 | --- | --- | --- | 1,87 | down |
| 5632764 | 7068853 | 1053099 | --- | --- | --- | 1,47 | up   |
| 5632767 | 7206133 | 1389982 | --- | --- | --- | 1,08 | up   |
| 5632771 | 7367971 | 1789117 | --- | --- | --- | 1,01 | up   |
| 5632790 | 7070836 | 1058336 | --- | --- | --- | 1,34 | up   |
| 5632891 | 7372840 | 1803760 | --- | --- | --- | 1,29 | up   |
| 5632899 | 7120827 | 1179352 | --- | --- | --- | 1,07 | down |
| 5632905 | 7068942 | 1053393 | --- | --- | --- | 1,59 | down |
| 5632910 | 7127540 | 1195288 | --- | --- | --- | 1,08 | down |
| 5632915 | 7031325 | 963573  | --- | --- | --- | 1,22 | down |
| 5633010 | 7098366 | 1123608 | --- | --- | --- | 1,18 | up   |
| 5633034 | 7248964 | 1494937 | --- | --- | --- | 1,11 | up   |
| 5633098 | 7183182 | 1333572 | --- | --- | --- | 1,07 | up   |
| 5633208 | 7232340 | 1453533 | --- | --- | --- | 1,63 | up   |
| 5633360 | 7234008 | 1458358 | --- | --- | --- | 1,56 | down |
| 5633407 | 7274780 | 1559198 | --- | --- | --- | 1,64 | up   |
| 5633495 | 7319937 | 1672264 | --- | --- | --- | 1,13 | down |
| 5633537 | 7183927 | 1335504 | --- | --- | --- | 1,16 | down |
| 5633538 | 7049399 | 1008351 | --- | --- | --- | 1,03 | down |
| 5633569 | 7043535 | 994088  | --- | --- | --- | 1,03 | up   |
| 5633632 | 7211389 | 1402115 | --- | --- | --- | 1,16 | down |
| 5633722 | 7331719 | 1699913 | --- | --- | --- | 1,37 | down |
| 5633740 | 7031618 | 964204  | --- | --- | --- | 1,57 | up   |
| 5633884 | 7209927 | 1398945 | --- | --- | --- | 1,26 | up   |
| 5633968 | 7064224 | 1041796 | --- | --- | --- | 1,36 | down |
| 5634078 | 7308679 | 1644253 | --- | --- | --- | 1,10 | up   |
| 5634091 | 7112225 | 1157569 | --- | --- | --- | 1,06 | up   |
| 5634103 | 7330396 | 1696364 | --- | --- | --- | 1,09 | down |
| 5634121 | 7328833 | 1692800 | --- | --- | --- | 1,32 | down |

|         |         |         |     |     |     |      |      |
|---------|---------|---------|-----|-----|-----|------|------|
| 5634291 | 7315571 | 1661010 | --- | --- | --- | 1,98 | down |
| 5634476 | 7364346 | 1780031 | --- | --- | --- | 1,98 | up   |
| 5634493 | 7070836 | 1058337 | --- | --- | --- | 2,02 | up   |
| 5634503 | 7062436 | 1037680 | --- | --- | --- | 1,29 | up   |
| 5634574 | 7196029 | 1365603 | --- | --- | --- | 1,51 | down |
| 5634587 | 7384073 | 1829453 | --- | --- | --- | 1,18 | down |
| 5634869 | 7180620 | 1326381 | --- | --- | --- | 1,25 | up   |
| 5634872 | 7213908 | 1407649 | --- | --- | --- | 1,07 | down |
| 5634889 | 7170764 | 1301471 | --- | --- | --- | 2,02 | up   |
| 5634891 | 7240569 | 1475470 | --- | --- | --- | 1,44 | down |
| 5634979 | 7180620 | 1326383 | --- | --- | --- | 1,03 | down |
| 5635075 | 7180687 | 1326626 | --- | --- | --- | 1,22 | up   |
| 5635171 | 7286807 | 1588841 | --- | --- | --- | 1,01 | up   |
| 5635197 | 7033672 | 970337  | --- | --- | --- | 1,33 | up   |
| 5635268 | 7038153 | 981158  | --- | --- | --- | 1,23 | down |
| 5635344 | 7174149 | 1310533 | --- | --- | --- | 1,41 | up   |
| 5635345 | 7031618 | 964198  | --- | --- | --- | 1,19 | up   |
| 5635420 | 7196029 | 1365629 | --- | --- | --- | 1,02 | up   |
| 5635434 | 7373634 | 1805729 | --- | --- | --- | 1,18 | down |
| 5635436 | 7086966 | 1095237 | --- | --- | --- | 1,20 | up   |
| 5635441 | 7038530 | 981879  | --- | --- | --- | 1,30 | up   |
| 5635450 | 7337224 | 1712585 | --- | --- | --- | 1,32 | down |
| 5635493 | 7068853 | 1053115 | --- | --- | --- | 1,01 | up   |
| 5635559 | 7341546 | 1723942 | --- | --- | --- | 1,14 | up   |
| 5635674 | 7385134 | 1831974 | --- | --- | --- | 1,03 | down |
| 5635756 | 7297589 | 1615622 | --- | --- | --- | 1,32 | down |
| 5635799 | 7265989 | 1537101 | --- | --- | --- | 1,51 | down |
| 5635838 | 7249503 | 1496207 | --- | --- | --- | 1,04 | up   |
| 5636067 | 7033504 | 969867  | --- | --- | --- | 1,28 | up   |
| 5636139 | 7099517 | 1126497 | --- | --- | --- | 1,36 | up   |
| 5636257 | 7162144 | 1280497 | --- | --- | --- | 1,32 | down |
| 5636279 | 7039223 | 983571  | --- | --- | --- | 1,43 | down |
| 5636390 | 7217650 | 1417206 | --- | --- | --- | 1,30 | down |
| 5636408 | 7117526 | 1170987 | --- | --- | --- | 1,74 | down |
| 5636472 | 7185622 | 1339212 | --- | --- | --- | 1,06 | up   |
| 5636514 | 7097525 | 1121062 | --- | --- | --- | 1,45 | down |
| 5636632 | 7036458 | 977022  | --- | --- | --- | 2,05 | up   |
| 5636652 | 7238115 | 1468668 | --- | --- | --- | 1,20 | up   |
| 5636704 | 7076236 | 1071192 | --- | --- | --- | 1,28 | up   |
| 5636721 | 7302018 | 1626961 | --- | --- | --- | 1,11 | down |
| 5636749 | 7067828 | 1050784 | --- | --- | --- | 1,16 | up   |
| 5636777 | 7339379 | 1718327 | --- | --- | --- | 1,71 | down |
| 5636887 | 7125348 | 1190100 | --- | --- | --- | 1,55 | up   |
| 5636910 | 7215722 | 1412268 | --- | --- | --- | 1,22 | up   |
| 5636931 | 7039821 | 985058  | --- | --- | --- | 1,39 | down |
| 5636964 | 7257361 | 1516098 | --- | --- | --- | 1,09 | down |
| 5637126 | 7248790 | 1494503 | --- | --- | --- | 1,14 | up   |
| 5637162 | 7207069 | 1392023 | --- | --- | --- | 1,00 | up   |
| 5637277 | 7094139 | 1112897 | --- | --- | --- | 1,02 | down |
| 5637311 | 7143272 | 1234230 | --- | --- | --- | 2,03 | up   |
| 5637312 | 7286807 | 1588777 | --- | --- | --- | 1,28 | up   |
| 5637475 | 7137646 | 1220430 | --- | --- | --- | 1,70 | down |
| 5637531 | 7249503 | 1496162 | --- | --- | --- | 1,15 | down |
| 5637533 | 7112225 | 1157599 | --- | --- | --- | 1,13 | up   |
| 5637622 | 7060851 | 1033366 | --- | --- | --- | 1,12 | up   |
| 5637641 | 7162144 | 1280490 | --- | --- | --- | 1,18 | down |

|         |         |         |     |     |     |      |      |
|---------|---------|---------|-----|-----|-----|------|------|
| 5637678 | 7112225 | 1157533 | --- | --- | --- | 1,20 | down |
| 5637694 | 7258520 | 1518869 | --- | --- | --- | 2,18 | up   |
| 5637747 | 7174149 | 1310495 | --- | --- | --- | 1,52 | up   |
| 5637824 | 7052813 | 1015927 | --- | --- | --- | 1,07 | up   |
| 5637857 | 7092965 | 1110192 | --- | --- | --- | 1,16 | up   |
| 5637975 | 7222221 | 1428056 | --- | --- | --- | 1,11 | down |
| 5638128 | 7384509 | 1830763 | --- | --- | --- | 1,86 | down |
| 5638163 | 7069253 | 1054157 | --- | --- | --- | 1,05 | up   |
| 5638353 | 7237719 | 1467477 | --- | --- | --- | 1,16 | down |
| 5638386 | 7234040 | 1458505 | --- | --- | --- | 1,18 | down |
| 5638438 | 7120010 | 1177376 | --- | --- | --- | 1,19 | up   |
| 5638468 | 7029985 | 960597  | --- | --- | --- | 1,33 | down |
| 5638482 | 7049399 | 1008401 | --- | --- | --- | 1,61 | up   |
| 5638591 | 7034293 | 971994  | --- | --- | --- | 1,24 | down |
| 5638818 | 7258546 | 1518975 | --- | --- | --- | 1,14 | up   |
| 5638871 | 7180630 | 1326426 | --- | --- | --- | 1,07 | up   |
| 5638887 | 7372840 | 1803781 | --- | --- | --- | 1,09 | up   |
| 5639009 | 7146245 | 1241362 | --- | --- | --- | 1,24 | up   |
| 5639019 | 7121866 | 1181871 | --- | --- | --- | 1,26 | up   |
| 5639073 | 7327169 | 1688442 | --- | --- | --- | 1,26 | up   |
| 5639122 | 7274780 | 1559226 | --- | --- | --- | 1,06 | down |
| 5639238 | 7201217 | 1378772 | --- | --- | --- | 1,24 | up   |
| 5639271 | 7101258 | 1130570 | --- | --- | --- | 1,14 | up   |
| 5639275 | 7254040 | 1507593 | --- | --- | --- | 1,17 | up   |
| 5639284 | 7255663 | 1511711 | --- | --- | --- | 1,08 | down |
| 5639288 | 7174281 | 1310844 | --- | --- | --- | 1,96 | up   |
| 5639409 | 7146093 | 1240983 | --- | --- | --- | 1,00 | down |
| 5639483 | 7247976 | 1492429 | --- | --- | --- | 1,08 | down |
| 5639492 | 7364948 | 1781218 | --- | --- | --- | 1,03 | down |
| 5639867 | 7337260 | 1712810 | --- | --- | --- | 1,07 | up   |
| 5640080 | 7263152 | 1530358 | --- | --- | --- | 1,07 | up   |
| 5640168 | 7127691 | 1195632 | --- | --- | --- | 1,11 | up   |
| 5640340 | 7049399 | 1008415 | --- | --- | --- | 1,09 | down |
| 5640343 | 7361042 | 1772264 | --- | --- | --- | 1,53 | up   |
| 5640370 | 7060851 | 1033422 | --- | --- | --- | 1,11 | down |
| 5640488 | 7270592 | 1548561 | --- | --- | --- | 1,16 | up   |
| 5640505 | 7089381 | 1102065 | --- | --- | --- | 1,66 | down |
| 5640510 | 7358859 | 1767002 | --- | --- | --- | 1,05 | up   |
| 5640515 | 7056304 | 1023627 | --- | --- | --- | 1,18 | up   |
| 5640556 | 7179785 | 1324499 | --- | --- | --- | 1,34 | up   |
| 5640589 | 7062436 | 1037653 | --- | --- | --- | 1,29 | up   |
| 5640617 | 7293757 | 1605681 | --- | --- | --- | 1,13 | down |
| 5640627 | 7220914 | 1425048 | --- | --- | --- | 2,35 | down |
| 5640664 | 7087282 | 1096144 | --- | --- | --- | 1,27 | down |
| 5640667 | 7384365 | 1830280 | --- | --- | --- | 1,36 | up   |
| 5640675 | 7209927 | 1398918 | --- | --- | --- | 1,12 | down |
| 5640730 | 7270574 | 1548526 | --- | --- | --- | 1,23 | down |
| 5640749 | 7028624 | 958006  | --- | --- | --- | 1,01 | down |
| 5640951 | 7108345 | 1148088 | --- | --- | --- | 1,06 | down |
| 5641298 | 7104977 | 1140169 | --- | --- | --- | 1,12 | up   |
| 5641337 | 7321029 | 1674804 | --- | --- | --- | 1,02 | down |
| 5641349 | 7274892 | 1559549 | --- | --- | --- | 2,26 | down |
| 5641386 | 7357813 | 1764112 | --- | --- | --- | 1,16 | down |
| 5641396 | 7276762 | 1564503 | --- | --- | --- | 1,46 | up   |
| 5641449 | 7112225 | 1157621 | --- | --- | --- | 1,00 | up   |
| 5641501 | 7303616 | 1631394 | --- | --- | --- | 1,40 | up   |

|         |         |         |     |     |     |      |      |
|---------|---------|---------|-----|-----|-----|------|------|
| 5641555 | 7280743 | 1574464 | --- | --- | --- | 1,07 | up   |
| 5641699 | 7359453 | 1768449 | --- | --- | --- | 1,05 | up   |
| 5641772 | 7052813 | 1015931 | --- | --- | --- | 1,25 | down |
| 5641891 | 7380497 | 1821829 | --- | --- | --- | 1,27 | down |
| 5641991 | 7240569 | 1475464 | --- | --- | --- | 1,03 | up   |
| 5642011 | 7065265 | 1044560 | --- | --- | --- | 1,16 | up   |
| 5642064 | 7369939 | 1795635 | --- | --- | --- | 1,99 | down |
| 5642083 | 7323545 | 1679938 | --- | --- | --- | 1,54 | up   |
| 5642100 | 7354688 | 1756381 | --- | --- | --- | 1,13 | down |
| 5642421 | 7340838 | 1722073 | --- | --- | --- | 1,83 | up   |
| 5642450 | 7186464 | 1341369 | --- | --- | --- | 1,29 | down |
| 5642493 | 7358048 | 1764805 | --- | --- | --- | 1,38 | down |
| 5642603 | 7356115 | 1760136 | --- | --- | --- | 1,08 | down |
| 5642731 | 7168914 | 1297034 | --- | --- | --- | 1,54 | up   |
| 5642951 | 7039223 | 983563  | --- | --- | --- | 1,01 | up   |
| 5642961 | 7070836 | 1058349 | --- | --- | --- | 1,10 | up   |
| 5642983 | 7033672 | 970368  | --- | --- | --- | 1,02 | up   |
| 5642990 | 7189689 | 1349058 | --- | --- | --- | 1,31 | down |
| 5643092 | 7059584 | 1030542 | --- | --- | --- | 1,72 | up   |
| 5643101 | 7050557 | 1010800 | --- | --- | --- | 1,20 | down |
| 5643302 | 7264797 | 1534427 | --- | --- | --- | 1,36 | up   |
| 5643354 | 7361042 | 1772278 | --- | --- | --- | 1,08 | down |
| 5643486 | 7209927 | 1398939 | --- | --- | --- | 1,18 | down |
| 5643498 | 7284359 | 1583436 | --- | --- | --- | 1,03 | up   |
| 5643771 | 7033337 | 969499  | --- | --- | --- | 1,52 | up   |
| 5643958 | 7073950 | 1065923 | --- | --- | --- | 1,20 | down |
| 5644135 | 7377513 | 1815291 | --- | --- | --- | 1,16 | down |
| 5644166 | 7052813 | 1015883 | --- | --- | --- | 1,24 | down |
| 5644186 | 7293402 | 1604804 | --- | --- | --- | 1,59 | up   |
| 5644252 | 7200129 | 1375996 | --- | --- | --- | 1,80 | down |
| 5644334 | 7087282 | 1096240 | --- | --- | --- | 1,36 | down |
| 5644373 | 7079600 | 1078629 | --- | --- | --- | 1,21 | down |
| 5644378 | 7084716 | 1090110 | --- | --- | --- | 2,38 | down |
| 5644384 | 7249503 | 1496165 | --- | --- | --- | 1,01 | down |
| 5644414 | 7334347 | 1705756 | --- | --- | --- | 1,12 | up   |
| 5644419 | 7279586 | 1572072 | --- | --- | --- | 1,26 | up   |
| 5644446 | 7057615 | 1026112 | --- | --- | --- | 2,99 | up   |
| 5644538 | 7065655 | 1045271 | --- | --- | --- | 1,17 | up   |
| 5644620 | 7147809 | 1245448 | --- | --- | --- | 1,12 | up   |
| 5644717 | 7340990 | 1722509 | --- | --- | --- | 1,17 | down |
| 5644825 | 7188829 | 1346662 | --- | --- | --- | 1,00 | down |
| 5644930 | 7291129 | 1599599 | --- | --- | --- | 1,11 | down |
| 5644967 | 7107321 | 1145318 | --- | --- | --- | 1,23 | up   |
| 5644981 | 7264797 | 1534422 | --- | --- | --- | 1,02 | down |
| 5644986 | 7156052 | 1265760 | --- | --- | --- | 1,11 | up   |
| 5645024 | 7329135 | 1693498 | --- | --- | --- | 1,05 | up   |
| 5645034 | 7228530 | 1443905 | --- | --- | --- | 1,22 | down |
| 5645046 | 7041609 | 989588  | --- | --- | --- | 1,01 | up   |
| 5645062 | 7027795 | 956272  | --- | --- | --- | 1,18 | up   |
| 5645350 | 7240569 | 1475503 | --- | --- | --- | 1,07 | down |
| 5645390 | 7129841 | 1200829 | --- | --- | --- | 1,01 | down |
| 5645543 | 7243130 | 1480898 | --- | --- | --- | 1,00 | down |
| 5645603 | 7247848 | 1492049 | --- | --- | --- | 1,31 | down |
| 5645735 | 7183182 | 1333563 | --- | --- | --- | 1,42 | up   |
| 5645775 | 7073950 | 1065938 | --- | --- | --- | 1,20 | down |
| 5645789 | 7313411 | 1655432 | --- | --- | --- | 1,04 | up   |

|         |         |         |     |     |     |      |      |
|---------|---------|---------|-----|-----|-----|------|------|
| 5645791 | 7373417 | 1805097 | --- | --- | --- | 1,20 | down |
| 5645868 | 7167883 | 1294099 | --- | --- | --- | 1,15 | down |
| 5645990 | 7097525 | 1121061 | --- | --- | --- | 1,12 | up   |
| 5646099 | 7140113 | 1226087 | --- | --- | --- | 1,98 | down |
| 5646107 | 7095956 | 1117045 | --- | --- | --- | 1,47 | down |
| 5646114 | 7025652 | 950282  | --- | --- | --- | 1,06 | down |
| 5646144 | 7337314 | 1712898 | --- | --- | --- | 1,17 | up   |
| 5646206 | 7310670 | 1648981 | --- | --- | --- | 2,09 | down |
| 5646263 | 7072765 | 1062741 | --- | --- | --- | 1,23 | down |
| 5646334 | 7360486 | 1770960 | --- | --- | --- | 1,05 | up   |
| 5646340 | 7345465 | 1733859 | --- | --- | --- | 1,09 | down |
| 5646383 | 7152974 | 1257659 | --- | --- | --- | 1,02 | down |
| 5646510 | 7255663 | 1511711 | --- | --- | --- | 1,08 | down |
| 5646514 | 7142853 | 1232904 | --- | --- | --- | 1,36 | down |
| 5646548 | 7303616 | 1631319 | --- | --- | --- | 1,11 | down |
| 5646667 | 7076236 | 1071178 | --- | --- | --- | 1,09 | down |
| 5646868 | 7337522 | 1713595 | --- | --- | --- | 1,49 | down |
| 5646880 | 7068853 | 1053123 | --- | --- | --- | 1,02 | down |
| 5646960 | 7378997 | 1818648 | --- | --- | --- | 1,21 | up   |
| 5646986 | 7331413 | 1699136 | --- | --- | --- | 1,00 | up   |
| 5647023 | 7338807 | 1716825 | --- | --- | --- | 1,38 | down |
| 5647058 | 7270397 | 1548132 | --- | --- | --- | 1,59 | down |
| 5647059 | 7070140 | 1056478 | --- | --- | --- | 2,96 | up   |
| 5647136 | 7174149 | 1310488 | --- | --- | --- | 1,14 | down |
| 5647146 | 7115708 | 1166476 | --- | --- | --- | 1,27 | up   |
| 5647204 | 7338807 | 1716825 | --- | --- | --- | 1,07 | down |
| 5647237 | 7240569 | 1475487 | --- | --- | --- | 1,08 | down |
| 5647249 | 7351951 | 1749850 | --- | --- | --- | 1,27 | down |
| 5647266 | 7154616 | 1262187 | --- | --- | --- | 2,63 | up   |
| 5647329 | 7112225 | 1157603 | --- | --- | --- | 1,20 | up   |
| 5647436 | 7331434 | 1699206 | --- | --- | --- | 1,12 | down |
| 5647505 | 7167507 | 1293108 | --- | --- | --- | 1,14 | up   |
| 5647599 | 7373906 | 1806354 | --- | --- | --- | 1,02 | up   |
| 5647671 | 7327169 | 1688440 | --- | --- | --- | 1,48 | up   |
| 5647718 | 7192696 | 1357171 | --- | --- | --- | 1,00 | up   |
| 5647769 | 7364346 | 1780010 | --- | --- | --- | 1,70 | up   |
| 5647806 | 7040260 | 986056  | --- | --- | --- | 1,18 | down |
| 5647873 | 7210600 | 1400526 | --- | --- | --- | 1,13 | down |
| 5647904 | 7258670 | 1519342 | --- | --- | --- | 1,30 | down |
| 5647927 | 7333462 | 1703643 | --- | --- | --- | 2,14 | down |
| 5647979 | 7156052 | 1265744 | --- | --- | --- | 1,53 | down |
| 5648068 | 7357890 | 1764390 | --- | --- | --- | 1,47 | up   |
| 5648144 | 7216676 | 1414421 | --- | --- | --- | 2,24 | down |
| 5648190 | 7037764 | 979986  | --- | --- | --- | 1,03 | down |
| 5648229 | 7369706 | 1794799 | --- | --- | --- | 1,23 | up   |
| 5648272 | 7067670 | 1050319 | --- | --- | --- | 2,08 | up   |
| 5648333 | 7378997 | 1818639 | --- | --- | --- | 1,38 | down |
| 5648338 | 7362184 | 1774819 | --- | --- | --- | 1,20 | up   |
| 5648469 | 7229856 | 1447078 | --- | --- | --- | 1,34 | up   |
| 5648496 | 7369400 | 1793983 | --- | --- | --- | 1,60 | down |
| 5648674 | 7352635 | 1751446 | --- | --- | --- | 1,55 | up   |
| 5648782 | 7344406 | 1731202 | --- | --- | --- | 1,15 | up   |
| 5648816 | 7221552 | 1426615 | --- | --- | --- | 1,19 | up   |
| 5649020 | 7031618 | 964201  | --- | --- | --- | 1,01 | up   |
| 5649051 | 7344838 | 1732458 | --- | --- | --- | 1,24 | down |
| 5649068 | 7094158 | 1112981 | --- | --- | --- | 1,05 | up   |

|         |         |         |     |     |     |      |      |
|---------|---------|---------|-----|-----|-----|------|------|
| 5649479 | 7143455 | 1234729 | --- | --- | --- | 1,35 | up   |
| 5649604 | 7295410 | 1609754 | --- | --- | --- | 1,20 | up   |
| 5649650 | 7059020 | 1029362 | --- | --- | --- | 1,10 | up   |
| 5649656 | 7069830 | 1055642 | --- | --- | --- | 1,02 | down |
| 5649676 | 7171047 | 1302370 | --- | --- | --- | 1,20 | up   |
| 5649716 | 7099273 | 1125958 | --- | --- | --- | 1,09 | up   |
| 5649744 | 7142770 | 1232693 | --- | --- | --- | 1,01 | down |
| 5649950 | 7384073 | 1829452 | --- | --- | --- | 1,19 | down |
| 5650049 | 7088625 | 1099877 | --- | --- | --- | 4,89 | down |
| 5650343 | 7101258 | 1130567 | --- | --- | --- | 1,11 | up   |
| 5650368 | 7297589 | 1615629 | --- | --- | --- | 1,26 | down |
| 5650437 | 7167507 | 1293122 | --- | --- | --- | 1,12 | down |
| 5650443 | 7243603 | 1482272 | --- | --- | --- | 1,17 | up   |
| 5650452 | 7189184 | 1347596 | --- | --- | --- | 1,33 | down |
| 5650597 | 7070869 | 1058492 | --- | --- | --- | 1,57 | up   |
| 5650652 | 7247954 | 1492396 | --- | --- | --- | 1,01 | down |
| 5650684 | 7068942 | 1053385 | --- | --- | --- | 1,16 | down |
| 5650873 | 7072552 | 1062133 | --- | --- | --- | 1,14 | up   |
| 5650878 | 7384365 | 1830270 | --- | --- | --- | 1,00 | up   |
| 5650938 | 7272110 | 1553031 | --- | --- | --- | 1,02 | up   |
| 5651104 | 7086966 | 1095253 | --- | --- | --- | 1,09 | down |
| 5651353 | 7181016 | 1327787 | --- | --- | --- | 1,06 | down |
| 5651587 | 7273251 | 1555948 | --- | --- | --- | 1,47 | up   |
| 5651593 | 7086966 | 1095236 | --- | --- | --- | 3,00 | up   |
| 5651628 | 7321414 | 1675640 | --- | --- | --- | 1,08 | up   |
| 5651678 | 7062436 | 1037682 | --- | --- | --- | 1,48 | up   |
| 5651684 | 7094158 | 1112972 | --- | --- | --- | 1,57 | down |
| 5651738 | 7174281 | 1310845 | --- | --- | --- | 2,40 | up   |
| 5651886 | 7376820 | 1813442 | --- | --- | --- | 1,49 | down |
| 5651910 | 7256191 | 1512862 | --- | --- | --- | 1,01 | down |
| 5651930 | 7141421 | 1229478 | --- | --- | --- | 2,36 | down |
| 5651954 | 7230611 | 1448801 | --- | --- | --- | 2,09 | up   |
| 5652024 | 7384509 | 1830731 | --- | --- | --- | 1,17 | up   |
| 5652119 | 7069830 | 1055643 | --- | --- | --- | 1,21 | down |
| 5652136 | 7131360 | 1204977 | --- | --- | --- | 1,22 | up   |
| 5652142 | 7236991 | 1465786 | --- | --- | --- | 2,17 | down |
| 5652220 | 7359551 | 1768623 | --- | --- | --- | 1,29 | down |
| 5652230 | 7186106 | 1340498 | --- | --- | --- | 1,14 | down |
| 5652234 | 7363132 | 1776960 | --- | --- | --- | 1,07 | up   |
| 5652266 | 7136062 | 1216294 | --- | --- | --- | 1,42 | up   |
| 5652284 | 7355804 | 1759431 | --- | --- | --- | 1,35 | up   |
| 5652295 | 7231152 | 1450228 | --- | --- | --- | 1,11 | down |
| 5652322 | 7373906 | 1806370 | --- | --- | --- | 1,52 | down |
| 5652353 | 7157341 | 1269149 | --- | --- | --- | 1,12 | down |
| 5652473 | 7115708 | 1166474 | --- | --- | --- | 1,18 | up   |
| 5652547 | 7064732 | 1042931 | --- | --- | --- | 1,56 | down |
| 5652573 | 7377513 | 1815290 | --- | --- | --- | 1,18 | down |
| 5652608 | 7061003 | 1033923 | --- | --- | --- | 1,10 | down |
| 5652717 | 7251608 | 1501459 | --- | --- | --- | 1,87 | down |
| 5652797 | 7188822 | 1346632 | --- | --- | --- | 1,05 | down |
| 5652843 | 7068942 | 1053380 | --- | --- | --- | 2,46 | up   |
| 5652863 | 7301890 | 1626691 | --- | --- | --- | 1,17 | down |
| 5652918 | 7097525 | 1121053 | --- | --- | --- | 1,27 | down |
| 5652977 | 7359551 | 1768623 | --- | --- | --- | 1,13 | down |
| 5653268 | 7182056 | 1330576 | --- | --- | --- | 1,06 | down |
| 5653282 | 7319937 | 1672294 | --- | --- | --- | 1,01 | up   |

|         |         |         |     |     |     |      |      |
|---------|---------|---------|-----|-----|-----|------|------|
| 5653349 | 7217650 | 1417171 | --- | --- | --- | 1,14 | up   |
| 5653379 | 7333462 | 1703641 | --- | --- | --- | 1,14 | down |
| 5653381 | 7329075 | 1693381 | --- | --- | --- | 1,24 | down |
| 5653435 | 7101643 | 1131578 | --- | --- | --- | 1,62 | up   |
| 5653437 | 7029078 | 958875  | --- | --- | --- | 1,35 | up   |
| 5653528 | 7374842 | 1808985 | --- | --- | --- | 1,00 | up   |
| 5653594 | 7349946 | 1744941 | --- | --- | --- | 1,30 | down |
| 5653612 | 7206133 | 1389981 | --- | --- | --- | 1,08 | up   |
| 5653890 | 7069830 | 1055639 | --- | --- | --- | 1,22 | up   |
| 5653924 | 7214363 | 1408947 | --- | --- | --- | 1,63 | down |
| 5653936 | 7213908 | 1407657 | --- | --- | --- | 1,27 | up   |
| 5653949 | 7279303 | 1571201 | --- | --- | --- | 1,40 | down |
| 5654024 | 7068853 | 1053136 | --- | --- | --- | 1,02 | up   |
| 5654035 | 7259923 | 1522524 | --- | --- | --- | 1,01 | down |
| 5654037 | 7339732 | 1719239 | --- | --- | --- | 1,07 | up   |
| 5654069 | 7067670 | 1050333 | --- | --- | --- | 2,15 | down |
| 5654083 | 7175368 | 1313278 | --- | --- | --- | 1,07 | up   |
| 5654095 | 7379957 | 1820634 | --- | --- | --- | 1,16 | up   |
| 5654104 | 7295410 | 1609716 | --- | --- | --- | 1,26 | up   |
| 5654227 | 7060851 | 1033425 | --- | --- | --- | 1,01 | down |
| 5654257 | 7297523 | 1615424 | --- | --- | --- | 1,14 | up   |
| 5654462 | 7368954 | 1792778 | --- | --- | --- | 2,18 | up   |
| 5654481 | 7176235 | 1315234 | --- | --- | --- | 1,28 | down |
| 5654504 | 7083030 | 1086248 | --- | --- | --- | 1,21 | up   |
| 5654551 | 7041465 | 989108  | --- | --- | --- | 1,70 | down |
| 5654567 | 7214363 | 1408974 | --- | --- | --- | 1,03 | up   |
| 5654740 | 7040260 | 986067  | --- | --- | --- | 1,31 | up   |
| 5654765 | 7114108 | 1162445 | --- | --- | --- | 1,11 | down |
| 5654836 | 7260613 | 1524279 | --- | --- | --- | 1,12 | up   |
| 5654852 | 7041061 | 988081  | --- | --- | --- | 1,42 | up   |
| 5654988 | 7107926 | 1146838 | --- | --- | --- | 1,41 | down |
| 5654989 | 7087965 | 1098047 | --- | --- | --- | 1,05 | up   |
| 5655049 | 7294151 | 1606635 | --- | --- | --- | 1,22 | up   |
| 5655060 | 7240569 | 1475400 | --- | --- | --- | 1,27 | down |
| 5655084 | 7200545 | 1376912 | --- | --- | --- | 1,38 | down |
| 5655244 | 7236254 | 1464054 | --- | --- | --- | 1,13 | up   |
| 5655266 | 7323545 | 1679942 | --- | --- | --- | 1,02 | up   |
| 5655364 | 7285061 | 1585156 | --- | --- | --- | 2,84 | down |
| 5655394 | 7169599 | 1298444 | --- | --- | --- | 1,07 | up   |
| 5655480 | 7037764 | 980088  | --- | --- | --- | 1,07 | up   |
| 5655617 | 7114108 | 1162451 | --- | --- | --- | 1,27 | up   |
| 5655636 | 7373633 | 1805697 | --- | --- | --- | 1,06 | up   |
| 5655712 | 7240569 | 1475472 | --- | --- | --- | 1,09 | down |
| 5655728 | 7069239 | 1054091 | --- | --- | --- | 1,70 | down |
| 5655776 | 7243130 | 1480824 | --- | --- | --- | 1,28 | up   |
| 5655804 | 7086966 | 1095263 | --- | --- | --- | 1,26 | down |
| 5655824 | 7147416 | 1244423 | --- | --- | --- | 1,04 | up   |
| 5655941 | 7319937 | 1672259 | --- | --- | --- | 1,45 | up   |
| 5655989 | 7094139 | 1112921 | --- | --- | --- | 1,65 | up   |
| 5656108 | 7169599 | 1298453 | --- | --- | --- | 1,04 | up   |
| 5656203 | 7190582 | 1351397 | --- | --- | --- | 1,06 | down |
| 5656223 | 7274892 | 1559566 | --- | --- | --- | 1,05 | up   |
| 5656279 | 7040260 | 986090  | --- | --- | --- | 1,00 | up   |
| 5656303 | 7327169 | 1688460 | --- | --- | --- | 2,26 | up   |
| 5656308 | 7052385 | 1014790 | --- | --- | --- | 1,12 | down |
| 5656535 | 7039302 | 983840  | --- | --- | --- | 1,04 | down |

|         |         |         |     |     |     |      |      |
|---------|---------|---------|-----|-----|-----|------|------|
| 5656584 | 7099573 | 1126723 | --- | --- | --- | 1,06 | up   |
| 5656602 | 7231835 | 1452278 | --- | --- | --- | 1,29 | up   |
| 5656619 | 7292517 | 1602554 | --- | --- | --- | 1,17 | up   |
| 5656789 | 7075424 | 1069301 | --- | --- | --- | 1,15 | down |
| 5656861 | 7217747 | 1417467 | --- | --- | --- | 1,16 | down |
| 5657013 | 7263152 | 1530355 | --- | --- | --- | 1,05 | up   |
| 5657054 | 7113483 | 1161021 | --- | --- | --- | 1,01 | up   |
| 5657070 | 7105375 | 1140969 | --- | --- | --- | 1,08 | down |
| 5657107 | 7060851 | 1033415 | --- | --- | --- | 1,26 | up   |
| 5657153 | 7062173 | 1037017 | --- | --- | --- | 2,01 | down |
| 5657185 | 7305674 | 1636848 | --- | --- | --- | 1,03 | down |
| 5657191 | 7236254 | 1464057 | --- | --- | --- | 1,16 | down |
| 5657222 | 7217679 | 1417297 | --- | --- | --- | 1,25 | up   |
| 5657226 | 7297589 | 1615666 | --- | --- | --- | 1,70 | up   |
| 5657241 | 7181193 | 1328299 | --- | --- | --- | 1,28 | down |
| 5657327 | 7247954 | 1492387 | --- | --- | --- | 1,14 | up   |
| 5657595 | 7384365 | 1830279 | --- | --- | --- | 1,41 | down |
| 5657648 | 7312566 | 1653300 | --- | --- | --- | 1,41 | up   |
| 5657712 | 7041609 | 989555  | --- | --- | --- | 1,12 | down |
| 5657753 | 7297274 | 1614658 | --- | --- | --- | 1,09 | down |
| 5657853 | 7210387 | 1400046 | --- | --- | --- | 1,12 | down |
| 5657897 | 7368004 | 1789328 | --- | --- | --- | 1,18 | up   |
| 5657916 | 7095021 | 1115139 | --- | --- | --- | 1,10 | up   |
| 5657917 | 7356115 | 1760114 | --- | --- | --- | 1,26 | up   |
| 5657954 | 7319937 | 1672278 | --- | --- | --- | 1,55 | down |
| 5657958 | 7088625 | 1099868 | --- | --- | --- | 1,39 | up   |
| 5658096 | 7067828 | 1050771 | --- | --- | --- | 1,27 | down |
| 5658121 | 7113083 | 1159968 | --- | --- | --- | 1,15 | up   |
| 5658199 | 7280959 | 1575055 | --- | --- | --- | 1,05 | down |
| 5658290 | 7181105 | 1327963 | --- | --- | --- | 1,18 | up   |
| 5658359 | 7143455 | 1234713 | --- | --- | --- | 2,20 | down |
| 5658436 | 7059020 | 1029349 | --- | --- | --- | 1,29 | up   |
| 5658445 | 7276762 | 1564484 | --- | --- | --- | 1,10 | up   |
| 5658472 | 7033504 | 969850  | --- | --- | --- | 1,46 | up   |
| 5658478 | 7071264 | 1059285 | --- | --- | --- | 1,02 | up   |
| 5658498 | 7083030 | 1086248 | --- | --- | --- | 1,31 | up   |
| 5658507 | 7152974 | 1257657 | --- | --- | --- | 2,48 | down |
| 5658524 | 7196029 | 1365624 | --- | --- | --- | 1,38 | down |
| 5658823 | 7319937 | 1672302 | --- | --- | --- | 1,50 | up   |
| 5658975 | 7061550 | 1035282 | --- | --- | --- | 1,59 | down |
| 5659004 | 7249737 | 1496760 | --- | --- | --- | 1,17 | up   |
| 5659174 | 7045955 | 1000746 | --- | --- | --- | 1,40 | down |
| 5659192 | 7112225 | 1157618 | --- | --- | --- | 1,00 | up   |
| 5659206 | 7253408 | 1505935 | --- | --- | --- | 1,46 | down |
| 5659254 | 7188681 | 1346293 | --- | --- | --- | 1,08 | up   |
| 5659440 | 7297421 | 1615065 | --- | --- | --- | 1,06 | down |
| 5659548 | 7297589 | 1615641 | --- | --- | --- | 1,45 | up   |
| 5659602 | 7189689 | 1349044 | --- | --- | --- | 1,27 | up   |
| 5659628 | 7162177 | 1280576 | --- | --- | --- | 2,04 | down |
| 5659690 | 7150631 | 1252158 | --- | --- | --- | 1,25 | up   |
| 5659767 | 7373658 | 1805799 | --- | --- | --- | 1,04 | down |
| 5659790 | 7293049 | 1603887 | --- | --- | --- | 1,71 | up   |
| 5659831 | 7319937 | 1672308 | --- | --- | --- | 1,01 | down |
| 5659872 | 7075445 | 1069353 | --- | --- | --- | 1,16 | down |
| 5659921 | 7339732 | 1719203 | --- | --- | --- | 1,57 | down |
| 5659928 | 7378997 | 1818646 | --- | --- | --- | 1,06 | up   |



|         |         |         |     |     |     |      |      |
|---------|---------|---------|-----|-----|-----|------|------|
| 5659946 | 7090278 | 1104112 | --- | --- | --- | 1,05 | down |
| 5660008 | 7198210 | 1371026 | --- | --- | --- | 1,13 | down |
| 5660014 | 7112225 | 1157561 | --- | --- | --- | 1,32 | up   |
| 5660134 | 7374790 | 1808783 | --- | --- | --- | 1,16 | up   |
| 5660195 | 7247228 | 1490533 | --- | --- | --- | 1,09 | up   |
| 5660241 | 7240569 | 1475502 | --- | --- | --- | 1,10 | up   |
| 5660259 | 7139708 | 1225067 | --- | --- | --- | 1,20 | down |
| 5660338 | 7210445 | 1400144 | --- | --- | --- | 2,03 | down |
| 5660360 | 7293402 | 1604856 | --- | --- | --- | 1,96 | up   |
| 5660419 | 7088625 | 1099880 | --- | --- | --- | 1,40 | up   |
| 5660423 | 7111244 | 1155383 | --- | --- | --- | 1,29 | down |
| 5660468 | 7070869 | 1058491 | --- | --- | --- | 1,41 | up   |
| 5660476 | 7028624 | 957993  | --- | --- | --- | 1,02 | up   |
| 5660517 | 7373038 | 1804289 | --- | --- | --- | 1,07 | down |
| 5660588 | 7189669 | 1348970 | --- | --- | --- | 1,12 | up   |
| 5660627 | 7207069 | 1392028 | --- | --- | --- | 1,50 | down |
| 5660730 | 7240569 | 1475479 | --- | --- | --- | 1,00 | up   |
| 5660819 | 7083030 | 1086259 | --- | --- | --- | 1,27 | up   |
| 5660826 | 7225304 | 1435315 | --- | --- | --- | 2,28 | down |
| 5660858 | 7088164 | 1098472 | --- | --- | --- | 1,05 | up   |
| 5660939 | 7031618 | 964198  | --- | --- | --- | 1,12 | up   |
| 5660942 | 7350489 | 1746106 | --- | --- | --- | 1,17 | down |
| 5661067 | 7184850 | 1337612 | --- | --- | --- | 1,07 | down |
| 5661073 | 7336250 | 1710163 | --- | --- | --- | 1,16 | up   |
| 5661078 | 7143455 | 1234728 | --- | --- | --- | 1,63 | down |
| 5661102 | 7336931 | 1711872 | --- | --- | --- | 1,08 | up   |
| 5661155 | 7142081 | 1230986 | --- | --- | --- | 1,04 | up   |
| 5661214 | 7340838 | 1722061 | --- | --- | --- | 1,01 | up   |
| 5661381 | 7067670 | 1050322 | --- | --- | --- | 1,67 | up   |
| 5661390 | 7249503 | 1496195 | --- | --- | --- | 1,02 | down |
| 5661483 | 7113083 | 1159966 | --- | --- | --- | 1,24 | up   |
| 5661601 | 7361223 | 1772620 | --- | --- | --- | 1,03 | up   |
| 5661633 | 7069142 | 1053880 | --- | --- | --- | 1,38 | up   |
| 5661700 | 7263248 | 1530601 | --- | --- | --- | 1,31 | up   |
| 5661833 | 7350993 | 1747497 | --- | --- | --- | 1,31 | up   |
| 5661883 | 7299512 | 1620552 | --- | --- | --- | 1,02 | up   |
| 5661911 | 7133612 | 1210265 | --- | --- | --- | 1,08 | up   |
| 5662041 | 7031325 | 963570  | --- | --- | --- | 1,04 | down |
| 5662259 | 7069724 | 1055337 | --- | --- | --- | 1,03 | up   |
| 5662281 | 7101564 | 1131389 | --- | --- | --- | 1,54 | down |
| 5662321 | 7239752 | 1473149 | --- | --- | --- | 1,20 | up   |
| 5662401 | 7064220 | 1041760 | --- | --- | --- | 1,26 | up   |
| 5662439 | 7376566 | 1812878 | --- | --- | --- | 1,25 | up   |
| 5662522 | 7330396 | 1696370 | --- | --- | --- | 1,37 | up   |
| 5662645 | 7139708 | 1225051 | --- | --- | --- | 1,51 | up   |
| 5662710 | 7122131 | 1182680 | --- | --- | --- | 1,15 | up   |
| 5662877 | 7254040 | 1507592 | --- | --- | --- | 1,05 | down |
| 5662891 | 7291054 | 1599405 | --- | --- | --- | 1,11 | up   |
| 5663026 | 7243130 | 1480854 | --- | --- | --- | 1,01 | down |
| 5663055 | 7097525 | 1121072 | --- | --- | --- | 1,37 | up   |
| 5663200 | 7148978 | 1248528 | --- | --- | --- | 1,04 | up   |
| 5663343 | 7173863 | 1309701 | --- | --- | --- | 2,21 | down |
| 5663381 | 7363132 | 1776954 | --- | --- | --- | 1,73 | up   |
| 5663434 | 7258546 | 1518930 | --- | --- | --- | 1,05 | down |
| 5663615 | 7092549 | 1109167 | --- | --- | --- | 1,29 | down |
| 5663645 | 7174281 | 1310875 | --- | --- | --- | 1,60 | up   |

|         |         |         |     |     |     |      |      |
|---------|---------|---------|-----|-----|-----|------|------|
| 5663670 | 7289382 | 1595205 | --- | --- | --- | 1,43 | down |
| 5663683 | 7305674 | 1636825 | --- | --- | --- | 1,06 | up   |
| 5663748 | 7162144 | 1280514 | --- | --- | --- | 1,51 | up   |
| 5663760 | 7337522 | 1713634 | --- | --- | --- | 1,43 | up   |
| 5663927 | 7329846 | 1694996 | --- | --- | --- | 1,48 | up   |
| 5664013 | 7358859 | 1766963 | --- | --- | --- | 1,16 | down |
| 5664021 | 7055876 | 1022469 | --- | --- | --- | 1,02 | up   |
| 5664033 | 7341253 | 1723257 | --- | --- | --- | 1,08 | down |
| 5664062 | 7344530 | 1731582 | --- | --- | --- | 1,17 | up   |
| 5664063 | 7090278 | 1104134 | --- | --- | --- | 1,28 | down |
| 5664178 | 7233440 | 1456840 | --- | --- | --- | 1,08 | up   |
| 5664231 | 7249388 | 1495880 | --- | --- | --- | 1,05 | down |
| 5664259 | 7196029 | 1365625 | --- | --- | --- | 1,98 | up   |
| 5664483 | 7259923 | 1522530 | --- | --- | --- | 1,20 | down |
| 5664514 | 7363568 | 1778141 | --- | --- | --- | 1,77 | down |
| 5664524 | 7036559 | 977250  | --- | --- | --- | 1,30 | up   |
| 5664537 | 7069253 | 1054153 | --- | --- | --- | 1,18 | down |
| 5664641 | 7346505 | 1736285 | --- | --- | --- | 1,23 | down |
| 5664725 | 7180620 | 1326399 | --- | --- | --- | 1,68 | up   |
| 5664731 | 7251608 | 1501462 | --- | --- | --- | 1,06 | up   |
| 5664741 | 7213908 | 1407698 | --- | --- | --- | 1,01 | up   |
| 5664939 | 7321029 | 1674827 | --- | --- | --- | 1,07 | up   |
| 5664956 | 7092549 | 1109178 | --- | --- | --- | 1,06 | down |
| 5665071 | 7115880 | 1166818 | --- | --- | --- | 1,28 | up   |
| 5665238 | 7211389 | 1402113 | --- | --- | --- | 1,02 | down |
| 5665241 | 7098451 | 1123818 | --- | --- | --- | 1,10 | down |
| 5665266 | 7315206 | 1660016 | --- | --- | --- | 1,02 | down |
| 5665293 | 7038153 | 981162  | --- | --- | --- | 1,20 | down |
| 5665312 | 7098077 | 1122730 | --- | --- | --- | 1,20 | down |
| 5665321 | 7068942 | 1053382 | --- | --- | --- | 1,21 | up   |
| 5665332 | 7236991 | 1465787 | --- | --- | --- | 1,20 | up   |
| 5665427 | 7064732 | 1042909 | --- | --- | --- | 1,25 | down |
| 5665485 | 7240569 | 1475403 | --- | --- | --- | 1,05 | up   |
| 5665597 | 7350489 | 1746120 | --- | --- | --- | 1,81 | down |
| 5665648 | 7359426 | 1768370 | --- | --- | --- | 1,23 | up   |
| 5665716 | 7217679 | 1417304 | --- | --- | --- | 1,66 | up   |
| 5665723 | 7339286 | 1718038 | --- | --- | --- | 1,54 | up   |
| 5665909 | 7139708 | 1225060 | --- | --- | --- | 1,02 | up   |
| 5666050 | 7319144 | 1670101 | --- | --- | --- | 1,14 | down |
| 5666066 | 7344836 | 1732411 | --- | --- | --- | 1,06 | down |
| 5666119 | 7276762 | 1564514 | --- | --- | --- | 2,25 | up   |
| 5666359 | 7331297 | 1698817 | --- | --- | --- | 1,09 | down |
| 5666391 | 7062927 | 1038620 | --- | --- | --- | 1,12 | up   |
| 5666636 | 7237711 | 1467430 | --- | --- | --- | 1,61 | down |
| 5666657 | 7279568 | 1572028 | --- | --- | --- | 1,11 | down |
| 5666993 | 7326612 | 1687204 | --- | --- | --- | 2,12 | down |
| 5667022 | 7340757 | 1721889 | --- | --- | --- | 1,39 | down |
| 5667102 | 7276650 | 1564163 | --- | --- | --- | 1,52 | down |
| 5667229 | 7148978 | 1248539 | --- | --- | --- | 1,84 | down |
| 5667595 | 7196803 | 1367338 | --- | --- | --- | 1,25 | up   |
| 5667711 | 7169573 | 1298391 | --- | --- | --- | 1,03 | up   |
| 5667717 | 7344190 | 1730618 | --- | --- | --- | 1,34 | down |
| 5667724 | 7131550 | 1205571 | --- | --- | --- | 2,25 | up   |
| 5667802 | 7123421 | 1185812 | --- | --- | --- | 1,41 | down |
| 5667904 | 7217650 | 1417177 | --- | --- | --- | 1,12 | up   |
| 5667974 | 7132020 | 1206308 | --- | --- | --- | 1,05 | up   |

|         |         |         |     |     |     |      |      |
|---------|---------|---------|-----|-----|-----|------|------|
| 5668090 | 7221453 | 1426358 | --- | --- | --- | 1,27 | down |
| 5668092 | 7203872 | 1384764 | --- | --- | --- | 1,11 | down |
| 5668158 | 7036412 | 976852  | --- | --- | --- | 1,02 | down |
| 5668224 | 7180861 | 1327217 | --- | --- | --- | 1,02 | up   |
| 5668238 | 7316644 | 1664000 | --- | --- | --- | 1,17 | up   |
| 5668243 | 7373633 | 1805716 | --- | --- | --- | 1,03 | up   |
| 5668244 | 7364948 | 1781228 | --- | --- | --- | 1,02 | down |
| 5668312 | 7276231 | 1563103 | --- | --- | --- | 1,04 | down |
| 5668846 | 7243603 | 1482258 | --- | --- | --- | 1,54 | up   |
| 5669018 | 7246866 | 1489791 | --- | --- | --- | 1,25 | down |
| 5669174 | 7326612 | 1687192 | --- | --- | --- | 1,38 | down |
| 5669231 | 7316644 | 1664037 | --- | --- | --- | 1,02 | down |
| 5669279 | 7378997 | 1818680 | --- | --- | --- | 1,93 | down |
| 5669315 | 7243647 | 1482481 | --- | --- | --- | 1,02 | up   |
| 5669347 | 7031774 | 964788  | --- | --- | --- | 1,34 | down |
| 5669444 | 7031774 | 964777  | --- | --- | --- | 1,05 | down |
| 5669552 | 7180630 | 1326456 | --- | --- | --- | 1,04 | down |
| 5669568 | 7263652 | 1531628 | --- | --- | --- | 1,14 | up   |
| 5669607 | 7188138 | 1345026 | --- | --- | --- | 1,00 | up   |
| 5669788 | 7170764 | 1301476 | --- | --- | --- | 1,06 | down |
| 5669860 | 7254405 | 1508638 | --- | --- | --- | 1,09 | up   |
| 5669925 | 7316644 | 1664004 | --- | --- | --- | 1,01 | up   |
| 5670007 | 7193987 | 1360666 | --- | --- | --- | 2,01 | up   |
| 5670035 | 7249503 | 1496218 | --- | --- | --- | 1,08 | up   |
| 5670098 | 7258176 | 1518212 | --- | --- | --- | 1,21 | down |
| 5670213 | 7217679 | 1417318 | --- | --- | --- | 1,08 | down |
| 5670335 | 7263152 | 1530359 | --- | --- | --- | 1,15 | down |
| 5670340 | 7112566 | 1158626 | --- | --- | --- | 1,10 | up   |
| 5670360 | 7065655 | 1045245 | --- | --- | --- | 1,18 | up   |
| 5670372 | 7131360 | 1204988 | --- | --- | --- | 1,14 | up   |
| 5670440 | 7217650 | 1417204 | --- | --- | --- | 1,46 | down |
| 5670453 | 7181193 | 1328293 | --- | --- | --- | 1,07 | down |
| 5670557 | 7328920 | 1693019 | --- | --- | --- | 2,17 | up   |
| 5670576 | 7192320 | 1356045 | --- | --- | --- | 1,20 | up   |
| 5670578 | 7243647 | 1482484 | --- | --- | --- | 1,22 | up   |
| 5670597 | 7312621 | 1653461 | --- | --- | --- | 1,17 | down |
| 5670609 | 7265989 | 1537099 | --- | --- | --- | 1,03 | up   |
| 5670743 | 7127257 | 1194800 | --- | --- | --- | 2,23 | up   |
| 5670820 | 7276762 | 1564503 | --- | --- | --- | 1,45 | up   |
| 5671155 | 7225304 | 1435318 | --- | --- | --- | 1,24 | up   |
| 5671164 | 7233970 | 1458274 | --- | --- | --- | 1,06 | up   |
| 5671199 | 7070616 | 1057794 | --- | --- | --- | 1,06 | up   |
| 5671245 | 7341397 | 1723637 | --- | --- | --- | 1,03 | up   |
| 5671255 | 7179143 | 1322789 | --- | --- | --- | 1,13 | up   |
| 5671261 | 7319937 | 1672290 | --- | --- | --- | 1,76 | up   |
| 5671361 | 7171525 | 1303444 | --- | --- | --- | 1,10 | down |
| 5671395 | 7038669 | 982179  | --- | --- | --- | 1,12 | down |
| 5671446 | 7078666 | 1076548 | --- | --- | --- | 1,49 | up   |
| 5671493 | 7217650 | 1417186 | --- | --- | --- | 1,26 | up   |
| 5671558 | 7095262 | 1115660 | --- | --- | --- | 1,10 | up   |
| 5671611 | 7068853 | 1053120 | --- | --- | --- | 1,11 | up   |
| 5671628 | 7111573 | 1156022 | --- | --- | --- | 1,11 | up   |
| 5671669 | 7303805 | 1632098 | --- | --- | --- | 1,26 | down |
| 5671812 | 7059375 | 1030078 | --- | --- | --- | 1,36 | up   |
| 5671964 | 7355421 | 1758509 | --- | --- | --- | 1,35 | down |
| 5672095 | 7249737 | 1496762 | --- | --- | --- | 1,10 | down |

|         |         |         |     |     |     |      |      |
|---------|---------|---------|-----|-----|-----|------|------|
| 5672202 | 7373906 | 1806374 | --- | --- | --- | 1,23 | down |
| 5672241 | 7297523 | 1615427 | --- | --- | --- | 1,09 | up   |
| 5672243 | 7034293 | 971904  | --- | --- | --- | 1,06 | down |
| 5672248 | 7305674 | 1636830 | --- | --- | --- | 1,62 | up   |
| 5672332 | 7340304 | 1720867 | --- | --- | --- | 1,82 | down |
| 5672416 | 7031774 | 964783  | --- | --- | --- | 1,17 | down |
| 5672474 | 7337224 | 1712620 | --- | --- | --- | 1,44 | up   |
| 5672486 | 7258784 | 1519674 | --- | --- | --- | 1,01 | down |
| 5672494 | 7060851 | 1033360 | --- | --- | --- | 1,32 | up   |
| 5672498 | 7349882 | 1744790 | --- | --- | --- | 1,46 | down |
| 5672542 | 7172066 | 1304738 | --- | --- | --- | 1,66 | down |
| 5672603 | 7284501 | 1583850 | --- | --- | --- | 1,05 | up   |
| 5672648 | 7371682 | 1800774 | --- | --- | --- | 2,26 | down |
| 5672685 | 7294264 | 1606843 | --- | --- | --- | 1,05 | up   |
| 5672750 | 7373417 | 1805105 | --- | --- | --- | 1,05 | up   |
| 5672861 | 7061367 | 1034829 | --- | --- | --- | 1,09 | up   |
| 5672973 | 7330396 | 1696345 | --- | --- | --- | 1,06 | down |
| 5673018 | 7287222 | 1589717 | --- | --- | --- | 1,26 | down |
| 5673104 | 7267953 | 1542264 | --- | --- | --- | 1,31 | up   |
| 5673189 | 7113483 | 1161005 | --- | --- | --- | 1,05 | down |
| 5673240 | 7258520 | 1518891 | --- | --- | --- | 1,03 | up   |
| 5673254 | 7041609 | 989575  | --- | --- | --- | 1,07 | up   |
| 5673325 | 7363568 | 1778138 | --- | --- | --- | 1,01 | up   |
| 5673352 | 7193056 | 1358257 | --- | --- | --- | 1,15 | up   |
| 5673422 | 7339110 | 1717607 | --- | --- | --- | 1,02 | down |
| 5673548 | 7331434 | 1699199 | --- | --- | --- | 1,32 | up   |
| 5673611 | 7050780 | 1011373 | --- | --- | --- | 1,33 | up   |
| 5673880 | 7252382 | 1503515 | --- | --- | --- | 1,12 | down |
| 5673977 | 7225553 | 1435969 | --- | --- | --- | 1,45 | down |
| 5674054 | 7247229 | 1490560 | --- | --- | --- | 1,30 | up   |
| 5674119 | 7078666 | 1076506 | --- | --- | --- | 1,10 | down |
| 5674251 | 7173863 | 1309701 | --- | --- | --- | 1,47 | down |
| 5674257 | 7237992 | 1468282 | --- | --- | --- | 1,17 | down |
| 5674515 | 7240569 | 1475388 | --- | --- | --- | 1,27 | down |
| 5674581 | 7131360 | 1204989 | --- | --- | --- | 1,20 | up   |
| 5674645 | 7371643 | 1800656 | --- | --- | --- | 1,03 | up   |
| 5674668 | 7092965 | 1110193 | --- | --- | --- | 1,06 | up   |
| 5674687 | 7217747 | 1417508 | --- | --- | --- | 1,04 | down |
| 5674724 | 7286807 | 1588804 | --- | --- | --- | 2,86 | up   |
| 5674983 | 7240569 | 1475512 | --- | --- | --- | 1,11 | down |
| 5675186 | 7060851 | 1033367 | --- | --- | --- | 1,01 | down |
| 5675188 | 7080731 | 1080983 | --- | --- | --- | 1,20 | up   |
| 5675195 | 7084999 | 1090714 | --- | --- | --- | 1,00 | up   |
| 5675271 | 7093936 | 1112480 | --- | --- | --- | 1,02 | up   |
| 5675479 | 7034756 | 973237  | --- | --- | --- | 1,23 | up   |
| 5675536 | 7031774 | 964765  | --- | --- | --- | 1,02 | up   |
| 5675582 | 7193056 | 1358267 | --- | --- | --- | 1,25 | down |
| 5675622 | 7273251 | 1555957 | --- | --- | --- | 1,74 | up   |
| 5675875 | 7226241 | 1437802 | --- | --- | --- | 1,07 | down |
| 5675877 | 7302786 | 1628860 | --- | --- | --- | 2,92 | down |
| 5675953 | 7156052 | 1265776 | --- | --- | --- | 1,31 | down |
| 5676003 | 7075424 | 1069292 | --- | --- | --- | 1,21 | up   |
| 5676106 | 7307424 | 1641140 | --- | --- | --- | 1,47 | down |
| 5676173 | 7303616 | 1631337 | --- | --- | --- | 1,01 | down |
| 5676227 | 7041609 | 989583  | --- | --- | --- | 1,16 | up   |
| 5676423 | 7174149 | 1310502 | --- | --- | --- | 1,05 | down |

|         |         |         |     |     |     |      |      |
|---------|---------|---------|-----|-----|-----|------|------|
| 5676560 | 7236358 | 1464255 | --- | --- | --- | 1,18 | down |
| 5676649 | 7180943 | 1327442 | --- | --- | --- | 1,38 | up   |
| 5676812 | 7350181 | 1745386 | --- | --- | --- | 1,04 | up   |
| 5676837 | 7039223 | 983566  | --- | --- | --- | 1,36 | down |
| 5676908 | 7211363 | 1402050 | --- | --- | --- | 1,01 | up   |
| 5676973 | 7031774 | 964724  | --- | --- | --- | 1,15 | up   |
| 5677097 | 7338807 | 1716790 | --- | --- | --- | 1,17 | down |
| 5677337 | 7285688 | 1586193 | --- | --- | --- | 1,08 | up   |
| 5677349 | 7193056 | 1358259 | --- | --- | --- | 1,04 | down |
| 5677380 | 7329135 | 1693483 | --- | --- | --- | 1,20 | down |
| 5677483 | 7299512 | 1620553 | --- | --- | --- | 1,17 | down |
| 5677517 | 7261768 | 1527177 | --- | --- | --- | 2,61 | up   |
| 5677562 | 7058813 | 1028898 | --- | --- | --- | 1,03 | down |
| 5677629 | 7340838 | 1722048 | --- | --- | --- | 1,48 | down |
| 5677741 | 7333100 | 1702831 | --- | --- | --- | 1,12 | up   |
| 5677812 | 7197056 | 1367845 | --- | --- | --- | 1,15 | up   |
| 5677832 | 7096859 | 1119323 | --- | --- | --- | 1,37 | up   |
| 5677841 | 7198210 | 1371010 | --- | --- | --- | 1,17 | down |
| 5677875 | 7307424 | 1641142 | --- | --- | --- | 1,11 | up   |
| 5677905 | 7303616 | 1631387 | --- | --- | --- | 1,15 | up   |
| 5678083 | 7098810 | 1124647 | --- | --- | --- | 1,15 | up   |
| 5678096 | 7351951 | 1749855 | --- | --- | --- | 1,08 | down |
| 5678112 | 7038316 | 981461  | --- | --- | --- | 1,17 | down |
| 5678200 | 7049689 | 1008893 | --- | --- | --- | 1,14 | up   |
| 5678399 | 7368004 | 1789332 | --- | --- | --- | 1,74 | up   |
| 5678491 | 7102976 | 1135051 | --- | --- | --- | 1,19 | down |
| 5678554 | 7291054 | 1599393 | --- | --- | --- | 1,03 | down |
| 5678662 | 7053874 | 1018328 | --- | --- | --- | 1,00 | up   |
| 5678774 | 7319937 | 1672285 | --- | --- | --- | 1,36 | down |
| 5678808 | 7175368 | 1313287 | --- | --- | --- | 1,20 | up   |
| 5678818 | 7331434 | 1699214 | --- | --- | --- | 1,04 | down |
| 5678826 | 7142081 | 1230986 | --- | --- | --- | 1,15 | up   |
| 5678837 | 7197056 | 1367840 | --- | --- | --- | 1,07 | up   |
| 5678839 | 7229886 | 1447163 | --- | --- | --- | 1,04 | up   |
| 5678916 | 7337224 | 1712629 | --- | --- | --- | 1,20 | down |
| 5678952 | 7349817 | 1744645 | --- | --- | --- | 1,66 | down |
| 5678953 | 7336727 | 1711290 | --- | --- | --- | 1,50 | up   |
| 5678964 | 7287222 | 1589717 | --- | --- | --- | 1,38 | up   |
| 5678987 | 7280743 | 1574534 | --- | --- | --- | 1,28 | down |
| 5679062 | 7364346 | 1780013 | --- | --- | --- | 1,89 | down |
| 5679277 | 7025652 | 950302  | --- | --- | --- | 1,02 | down |
| 5679298 | 7097680 | 1121715 | --- | --- | --- | 1,14 | down |
| 5679388 | 7049689 | 1008888 | --- | --- | --- | 1,31 | down |
| 5679394 | 7258520 | 1518879 | --- | --- | --- | 1,11 | down |
| 5679433 | 7378997 | 1818662 | --- | --- | --- | 1,07 | down |
| 5679471 | 7180861 | 1327223 | --- | --- | --- | 1,20 | down |
| 5679544 | 7087805 | 1097502 | --- | --- | --- | 1,21 | down |
| 5679647 | 7303616 | 1631311 | --- | --- | --- | 1,10 | down |
| 5679747 | 7049399 | 1008364 | --- | --- | --- | 1,10 | up   |
| 5679801 | 7038610 | 982074  | --- | --- | --- | 1,27 | up   |
| 5679809 | 7132125 | 1206635 | --- | --- | --- | 1,02 | down |
| 5679824 | 7160402 | 1276157 | --- | --- | --- | 1,03 | up   |
| 5679845 | 7233359 | 1456510 | --- | --- | --- | 1,17 | up   |
| 5679856 | 7286807 | 1588844 | --- | --- | --- | 1,35 | up   |
| 5679921 | 7338101 | 1715192 | --- | --- | --- | 1,08 | down |
| 5679959 | 7240569 | 1475462 | --- | --- | --- | 1,07 | up   |

|         |         |         |     |     |     |      |      |
|---------|---------|---------|-----|-----|-----|------|------|
| 5680012 | 7169732 | 1298774 | --- | --- | --- | 1,19 | up   |
| 5680022 | 7047865 | 1005353 | --- | --- | --- | 1,12 | up   |
| 5680120 | 7258546 | 1518984 | --- | --- | --- | 1,06 | down |
| 5680176 | 7303616 | 1631390 | --- | --- | --- | 1,01 | down |
| 5680303 | 7337224 | 1712607 | --- | --- | --- | 1,22 | up   |
| 5680368 | 7071714 | 1060351 | --- | --- | --- | 2,42 | down |
| 5680385 | 7374790 | 1808778 | --- | --- | --- | 1,12 | down |
| 5680436 | 7031576 | 964110  | --- | --- | --- | 1,03 | up   |
| 5680440 | 7293454 | 1604952 | --- | --- | --- | 1,13 | up   |
| 5680522 | 7062173 | 1037006 | --- | --- | --- | 1,22 | down |
| 5680585 | 7129688 | 1200558 | --- | --- | --- | 1,23 | down |
| 5680674 | 7207069 | 1392020 | --- | --- | --- | 1,52 | down |
| 5680693 | 7033504 | 969858  | --- | --- | --- | 1,23 | down |
| 5680704 | 7068942 | 1053376 | --- | --- | --- | 1,02 | up   |
| 5680724 | 7330396 | 1696344 | --- | --- | --- | 1,26 | down |
| 5680845 | 7321414 | 1675633 | --- | --- | --- | 1,32 | down |
| 5680939 | 7233425 | 1456778 | --- | --- | --- | 1,18 | down |
| 5681054 | 7239752 | 1473189 | --- | --- | --- | 1,05 | up   |
| 5681078 | 7247228 | 1490513 | --- | --- | --- | 1,01 | down |
| 5681097 | 7206133 | 1389963 | --- | --- | --- | 1,23 | up   |
| 5681203 | 7031576 | 964108  | --- | --- | --- | 1,44 | down |
| 5681403 | 7350237 | 1745495 | --- | --- | --- | 1,09 | down |
| 5681426 | 7142081 | 1230985 | --- | --- | --- | 1,16 | up   |
| 5681463 | 7118356 | 1173172 | --- | --- | --- | 1,20 | down |
| 5681586 | 7090278 | 1104073 | --- | --- | --- | 1,03 | up   |
| 5681597 | 7328920 | 1693021 | --- | --- | --- | 1,05 | down |
| 5681613 | 7237438 | 1466792 | --- | --- | --- | 1,02 | down |
| 5681618 | 7169599 | 1298443 | --- | --- | --- | 1,21 | up   |
| 5681788 | 7234195 | 1458974 | --- | --- | --- | 1,11 | up   |
| 5681871 | 7303616 | 1631396 | --- | --- | --- | 1,18 | down |
| 5681885 | 7240569 | 1475524 | --- | --- | --- | 1,13 | up   |
| 5681963 | 7056304 | 1023548 | --- | --- | --- | 1,08 | up   |
| 5681987 | 7340990 | 1722516 | --- | --- | --- | 1,04 | up   |
| 5682016 | 7337260 | 1712809 | --- | --- | --- | 1,22 | down |
| 5682084 | 7312566 | 1653299 | --- | --- | --- | 1,63 | down |
| 5682087 | 7065266 | 1044585 | --- | --- | --- | 1,12 | up   |
| 5682105 | 7206133 | 1389980 | --- | --- | --- | 1,08 | down |
| 5682220 | 7098867 | 1124947 | --- | --- | --- | 1,14 | down |
| 5682260 | 7239939 | 1473794 | --- | --- | --- | 1,35 | down |
| 5682299 | 7342959 | 1727346 | --- | --- | --- | 1,16 | up   |
| 5682317 | 7336931 | 1711874 | --- | --- | --- | 1,00 | up   |
| 5682400 | 7061003 | 1033923 | --- | --- | --- | 2,33 | down |
| 5682476 | 7293757 | 1605693 | --- | --- | --- | 1,18 | up   |
| 5682529 | 7073854 | 1065631 | --- | --- | --- | 1,08 | down |
| 5682594 | 7245695 | 1487064 | --- | --- | --- | 1,01 | down |
| 5682606 | 7175368 | 1313286 | --- | --- | --- | 1,18 | down |
| 5682783 | 7211363 | 1402037 | --- | --- | --- | 1,24 | up   |
| 5682831 | 7231775 | 1452123 | --- | --- | --- | 1,11 | up   |
| 5682834 | 7225553 | 1435984 | --- | --- | --- | 1,35 | up   |
| 5682884 | 7156978 | 1268180 | --- | --- | --- | 1,53 | up   |
| 5682885 | 7137646 | 1220430 | --- | --- | --- | 2,08 | down |
| 5683022 | 7031576 | 964103  | --- | --- | --- | 1,09 | up   |
| 5683240 | 7243253 | 1481232 | --- | --- | --- | 1,07 | up   |
| 5683352 | 7168914 | 1297026 | --- | --- | --- | 1,37 | up   |
| 5683686 | 7261768 | 1527178 | --- | --- | --- | 1,71 | up   |
| 5683695 | 7367969 | 1789104 | --- | --- | --- | 1,90 | down |

|         |         |         |     |     |     |      |      |
|---------|---------|---------|-----|-----|-----|------|------|
| 5683808 | 7236492 | 1464531 | --- | --- | --- | 2,45 | up   |
| 5683810 | 7033541 | 969985  | --- | --- | --- | 1,28 | up   |
| 5683904 | 7039308 | 983921  | --- | --- | --- | 1,04 | down |
| 5683951 | 7199341 | 1374164 | --- | --- | --- | 1,01 | up   |
| 5684002 | 7225553 | 1435989 | --- | --- | --- | 1,17 | up   |
| 5684159 | 7365183 | 1781911 | --- | --- | --- | 1,19 | up   |
| 5684204 | 7170764 | 1301490 | --- | --- | --- | 1,06 | down |
| 5684347 | 7226241 | 1437812 | --- | --- | --- | 1,36 | down |
| 5684356 | 7367946 | 1788963 | --- | --- | --- | 1,14 | down |
| 5684402 | 7248790 | 1494534 | --- | --- | --- | 1,27 | up   |
| 5684410 | 7088489 | 1099525 | --- | --- | --- | 1,97 | down |
| 5684426 | 7198210 | 1370956 | --- | --- | --- | 1,01 | down |
| 5684507 | 7325674 | 1685223 | --- | --- | --- | 1,03 | down |
| 5684518 | 7200545 | 1376910 | --- | --- | --- | 2,28 | up   |
| 5684818 | 7167823 | 1293895 | --- | --- | --- | 1,13 | down |
| 5684864 | 7041609 | 989563  | --- | --- | --- | 1,33 | up   |
| 5684915 | 7343122 | 1727734 | --- | --- | --- | 1,19 | up   |
| 5684981 | 7099517 | 1126495 | --- | --- | --- | 2,67 | up   |
| 5684995 | 7031618 | 964198  | --- | --- | --- | 1,60 | up   |
| 5685078 | 7185622 | 1339212 | --- | --- | --- | 1,04 | down |
| 5685230 | 7067212 | 1049200 | --- | --- | --- | 1,09 | up   |
| 5685443 | 7117526 | 1171003 | --- | --- | --- | 1,99 | up   |
| 5685462 | 7141421 | 1229478 | --- | --- | --- | 1,06 | down |
| 5685502 | 7101400 | 1130911 | --- | --- | --- | 1,03 | up   |
| 5685560 | 7226241 | 1437782 | --- | --- | --- | 1,01 | up   |
| 5685566 | 7031774 | 964761  | --- | --- | --- | 1,20 | down |
| 5685704 | 7140113 | 1226047 | --- | --- | --- | 1,50 | down |
| 5685729 | 7062436 | 1037668 | --- | --- | --- | 1,15 | down |
| 5685762 | 7217747 | 1417469 | --- | --- | --- | 1,28 | up   |
| 5685831 | 7297274 | 1614569 | --- | --- | --- | 1,09 | down |
| 5685838 | 7224166 | 1432705 | --- | --- | --- | 1,39 | down |
| 5686209 | 7373417 | 1805089 | --- | --- | --- | 1,14 | up   |
| 5686213 | 7127540 | 1195285 | --- | --- | --- | 1,09 | up   |
| 5686223 | 7360486 | 1770943 | --- | --- | --- | 1,02 | up   |
| 5686306 | 7162144 | 1280492 | --- | --- | --- | 1,34 | down |
| 5686384 | 7292517 | 1602553 | --- | --- | --- | 1,47 | down |
| 5686407 | 7103811 | 1137056 | --- | --- | --- | 1,64 | up   |
| 5686457 | 7365093 | 1781619 | --- | --- | --- | 1,08 | down |
| 5686475 | 7039265 | 983649  | --- | --- | --- | 1,25 | up   |
| 5686501 | 7174149 | 1310526 | --- | --- | --- | 1,16 | up   |
| 5686605 | 7240569 | 1475482 | --- | --- | --- | 1,56 | down |
| 5686609 | 7112225 | 1157552 | --- | --- | --- | 1,40 | up   |
| 5686674 | 7339379 | 1718361 | --- | --- | --- | 1,18 | down |
| 5686873 | 7031774 | 964781  | --- | --- | --- | 1,29 | down |
| 5686985 | 7240569 | 1475313 | --- | --- | --- | 1,10 | up   |
| 5687012 | 7145669 | 1239998 | --- | --- | --- | 1,56 | up   |
| 5687078 | 7261592 | 1526839 | --- | --- | --- | 1,08 | up   |
| 5687234 | 7320337 | 1673312 | --- | --- | --- | 1,08 | down |
| 5687284 | 7099449 | 1126374 | --- | --- | --- | 2,52 | up   |
| 5687338 | 7127540 | 1195290 | --- | --- | --- | 1,14 | down |
| 5687392 | 7330396 | 1696365 | --- | --- | --- | 1,22 | down |
| 5687635 | 7067670 | 1050364 | --- | --- | --- | 1,03 | down |
| 5687645 | 7027795 | 956270  | --- | --- | --- | 1,52 | up   |
| 5687751 | 7092549 | 1109148 | --- | --- | --- | 1,19 | up   |
| 5688065 | 7280743 | 1574494 | --- | --- | --- | 1,17 | down |
| 5688131 | 7097525 | 1121067 | --- | --- | --- | 1,86 | down |

|         |         |         |     |     |     |      |      |
|---------|---------|---------|-----|-----|-----|------|------|
| 5688307 | 7217269 | 1415905 | --- | --- | --- | 2,72 | down |
| 5688423 | 7096924 | 1119616 | --- | --- | --- | 1,11 | down |
| 5688554 | 7193644 | 1359709 | --- | --- | --- | 1,11 | up   |
| 5688767 | 7292517 | 1602527 | --- | --- | --- | 1,15 | up   |
| 5688861 | 7065265 | 1044569 | --- | --- | --- | 1,16 | down |
| 5688910 | 7052385 | 1014773 | --- | --- | --- | 1,01 | down |
| 5688949 | 7111573 | 1156034 | --- | --- | --- | 1,06 | up   |
| 5689023 | 7076160 | 1070930 | --- | --- | --- | 1,26 | up   |
| 5689239 | 7062173 | 1037017 | --- | --- | --- | 1,09 | up   |
| 5689272 | 7052813 | 1015906 | --- | --- | --- | 1,28 | up   |
| 5689386 | 7161841 | 1279878 | --- | --- | --- | 1,62 | up   |
| 5689479 | 7034293 | 971951  | --- | --- | --- | 1,47 | down |
| 5689485 | 7097680 | 1121743 | --- | --- | --- | 1,16 | up   |
| 5689508 | 7367971 | 1789109 | --- | --- | --- | 1,02 | up   |
| 5689530 | 7127540 | 1195296 | --- | --- | --- | 1,32 | down |
| 5689854 | 7123421 | 1185811 | --- | --- | --- | 1,10 | down |
| 5689867 | 7186464 | 1341370 | --- | --- | --- | 1,03 | up   |
| 5690219 | 7363765 | 1778585 | --- | --- | --- | 1,33 | up   |
| 5690227 | 7303616 | 1631370 | --- | --- | --- | 1,08 | up   |
| 5690461 | 7132125 | 1206625 | --- | --- | --- | 1,03 | up   |
| 5690517 | 7067670 | 1050365 | --- | --- | --- | 1,88 | down |
| 5690553 | 7070461 | 1057366 | --- | --- | --- | 2,99 | down |
| 5690615 | 7123421 | 1185845 | --- | --- | --- | 1,05 | up   |
| 5690621 | 7054147 | 1018977 | --- | --- | --- | 1,24 | up   |
| 5690647 | 7075424 | 1069303 | --- | --- | --- | 1,22 | down |
| 5690888 | 7097680 | 1121745 | --- | --- | --- | 1,09 | up   |
| 5690911 | 7148978 | 1248473 | --- | --- | --- | 1,34 | up   |
| 5690937 | 7257976 | 1517711 | --- | --- | --- | 1,27 | up   |
| 5690977 | 7099030 | 1125338 | --- | --- | --- | 1,75 | down |
| 5691037 | 7129696 | 1200588 | --- | --- | --- | 1,09 | up   |
| 5691056 | 7217747 | 1417491 | --- | --- | --- | 1,22 | up   |
| 5691127 | 7086664 | 1094265 | --- | --- | --- | 1,18 | up   |
| 5691203 | 7108300 | 1147910 | --- | --- | --- | 1,13 | down |
| 5691207 | 7376566 | 1812884 | --- | --- | --- | 1,03 | down |
| 5691274 | 7040260 | 986044  | --- | --- | --- | 1,03 | up   |
| 5691322 | 7274780 | 1559185 | --- | --- | --- | 1,08 | down |
| 5691330 | 7240569 | 1475394 | --- | --- | --- | 1,03 | up   |
| 5691365 | 7243653 | 1482522 | --- | --- | --- | 1,17 | down |
| 5691435 | 7360486 | 1770977 | --- | --- | --- | 1,06 | down |
| 5691469 | 7096924 | 1119625 | --- | --- | --- | 1,11 | up   |
| 5691486 | 7288095 | 1592050 | --- | --- | --- | 1,27 | up   |
| 5691678 | 7248004 | 1492580 | --- | --- | --- | 1,07 | up   |
| 5691819 | 7036412 | 976864  | --- | --- | --- | 1,16 | down |
| 5691839 | 7203872 | 1384780 | --- | --- | --- | 1,12 | up   |
| 5691841 | 7131360 | 1204990 | --- | --- | --- | 1,24 | up   |
| 5691901 | 7049399 | 1008388 | --- | --- | --- | 1,07 | down |
| 5691922 | 7142416 | 1231800 | --- | --- | --- | 1,43 | up   |
| 5691947 | 7102510 | 1133876 | --- | --- | --- | 1,17 | up   |
| 5692002 | 7271128 | 1550321 | --- | --- | --- | 1,18 | down |
| 5692040 | 7293234 | 1604335 | --- | --- | --- | 1,14 | down |
| 5692074 | 7181016 | 1327791 | --- | --- | --- | 2,06 | up   |
| 5692115 | 7213908 | 1407652 | --- | --- | --- | 1,16 | up   |
| 5692280 | 7049399 | 1008389 | --- | --- | --- | 1,09 | up   |
| 5692312 | 7186464 | 1341365 | --- | --- | --- | 1,22 | up   |
| 5692516 | 7248790 | 1494509 | --- | --- | --- | 1,57 | down |
| 5692544 | 7139708 | 1225055 | --- | --- | --- | 1,20 | up   |



|         |         |         |     |     |     |      |      |
|---------|---------|---------|-----|-----|-----|------|------|
| 5692621 | 7316644 | 1664027 | --- | --- | --- | 1,24 | up   |
| 5692666 | 7050557 | 1010791 | --- | --- | --- | 1,44 | up   |
| 5692836 | 7243647 | 1482470 | --- | --- | --- | 1,15 | up   |
| 5692854 | 7149008 | 1248599 | --- | --- | --- | 1,26 | down |
| 5692881 | 7088135 | 1098419 | --- | --- | --- | 1,51 | down |
| 5692885 | 7101258 | 1130577 | --- | --- | --- | 1,41 | up   |
| 5692920 | 7330396 | 1696336 | --- | --- | --- | 1,08 | up   |
| 5693129 | 7271128 | 1550314 | --- | --- | --- | 1,18 | up   |
| 5693220 | 7086751 | 1094622 | --- | --- | --- | 1,12 | up   |
| 5693323 | 7337522 | 1713620 | --- | --- | --- | 1,87 | down |
| 5693354 | 7213679 | 1407132 | --- | --- | --- | 2,09 | down |
| 5693402 | 7064220 | 1041739 | --- | --- | --- | 1,52 | down |
| 5693438 | 7350489 | 1746116 | --- | --- | --- | 1,13 | up   |
| 5693466 | 7108300 | 1147916 | --- | --- | --- | 1,35 | up   |
| 5693468 | 7142416 | 1231800 | --- | --- | --- | 1,22 | up   |
| 5693669 | 7065655 | 1045240 | --- | --- | --- | 1,01 | down |
| 5693681 | 7049399 | 1008389 | --- | --- | --- | 1,03 | down |
| 5693751 | 7372840 | 1803770 | --- | --- | --- | 1,19 | down |
| 5693849 | 7112562 | 1158605 | --- | --- | --- | 1,66 | down |
| 5693874 | 7115880 | 1166822 | --- | --- | --- | 1,01 | up   |
| 5693882 | 7068853 | 1053100 | --- | --- | --- | 1,00 | up   |
| 5693917 | 7218259 | 1418786 | --- | --- | --- | 1,37 | up   |
| 5693920 | 7167507 | 1293115 | --- | --- | --- | 1,39 | down |
| 5693923 | 7034293 | 971996  | --- | --- | --- | 1,05 | up   |
| 5693951 | 7289382 | 1595183 | --- | --- | --- | 1,27 | up   |
| 5694228 | 7289909 | 1596507 | --- | --- | --- | 1,01 | up   |
| 5694350 | 7059020 | 1029340 | --- | --- | --- | 1,50 | up   |
| 5694436 | 7031774 | 964706  | --- | --- | --- | 1,17 | up   |
| 5694457 | 7103811 | 1137052 | --- | --- | --- | 1,42 | up   |
| 5694577 | 7146093 | 1240932 | --- | --- | --- | 1,13 | up   |
| 5694731 | 7050930 | 1011626 | --- | --- | --- | 1,12 | down |
| 5694811 | 7138131 | 1221463 | --- | --- | --- | 1,32 | down |
| 5694844 | 7189689 | 1349042 | --- | --- | --- | 1,46 | up   |
| 5694876 | 7082098 | 1084117 | --- | --- | --- | 1,27 | down |
| 5694935 | 7244290 | 1484159 | --- | --- | --- | 1,01 | up   |
| 5695102 | 7378997 | 1818666 | --- | --- | --- | 1,19 | down |
| 5695133 | 7148978 | 1248533 | --- | --- | --- | 1,17 | down |
| 5695305 | 7188829 | 1346661 | --- | --- | --- | 1,08 | down |
| 5695349 | 7228530 | 1443791 | --- | --- | --- | 1,14 | up   |
| 5695391 | 7329135 | 1693495 | --- | --- | --- | 1,14 | up   |
| 5695401 | 7234195 | 1458981 | --- | --- | --- | 1,04 | down |
| 5695417 | 7279568 | 1572021 | --- | --- | --- | 1,28 | up   |
| 5695491 | 7115880 | 1166831 | --- | --- | --- | 1,04 | up   |
| 5695524 | 7080106 | 1079717 | --- | --- | --- | 1,04 | up   |
| 5695551 | 7104977 | 1140174 | --- | --- | --- | 1,21 | down |
| 5695699 | 7059449 | 1030305 | --- | --- | --- | 1,30 | up   |
| 5695763 | 7249388 | 1495899 | --- | --- | --- | 1,32 | down |
| 5695954 | 7190844 | 1352153 | --- | --- | --- | 1,24 | up   |
| 5696064 | 7311218 | 1650358 | --- | --- | --- | 1,12 | down |
| 5696170 | 7196508 | 1366725 | --- | --- | --- | 1,01 | up   |
| 5696263 | 7182713 | 1332554 | --- | --- | --- | 1,17 | up   |
| 5696278 | 7217650 | 1417189 | --- | --- | --- | 1,31 | down |
| 5696554 | 7239752 | 1473183 | --- | --- | --- | 1,33 | up   |
| 5696594 | 7248790 | 1494543 | --- | --- | --- | 1,38 | down |
| 5696749 | 7361420 | 1773057 | --- | --- | --- | 1,09 | up   |
| 5696819 | 7127540 | 1195289 | --- | --- | --- | 1,30 | up   |

|         |         |         |     |     |     |      |      |
|---------|---------|---------|-----|-----|-----|------|------|
| 5696955 | 7351951 | 1749822 | --- | --- | --- | 1,07 | down |
| 5697072 | 7088489 | 1099528 | --- | --- | --- | 1,04 | down |
| 5697205 | 7084193 | 1089067 | --- | --- | --- | 1,47 | up   |
| 5697220 | 7212718 | 1404941 | --- | --- | --- | 1,10 | up   |
| 5697264 | 7316644 | 1664016 | --- | --- | --- | 1,01 | up   |
| 5697272 | 7075096 | 1068575 | --- | --- | --- | 2,39 | down |
| 5697355 | 7249503 | 1496220 | --- | --- | --- | 1,23 | down |
| 5697367 | 7053874 | 1018336 | --- | --- | --- | 1,20 | down |
| 5697599 | 7199476 | 1374567 | --- | --- | --- | 1,03 | down |
| 5697671 | 7341546 | 1723950 | --- | --- | --- | 2,04 | down |
| 5697731 | 7218728 | 1419923 | --- | --- | --- | 1,11 | up   |
| 5697768 | 7292657 | 1602839 | --- | --- | --- | 1,31 | up   |
| 5697813 | 7146245 | 1241377 | --- | --- | --- | 1,00 | up   |
| 5698017 | 7233921 | 1458159 | --- | --- | --- | 4,44 | down |
| 5698261 | 7293049 | 1603879 | --- | --- | --- | 1,38 | up   |
| 5698313 | 7083030 | 1086257 | --- | --- | --- | 1,17 | up   |
| 5698359 | 7344406 | 1731192 | --- | --- | --- | 1,11 | up   |
| 5698410 | 7141061 | 1228649 | --- | --- | --- | 1,23 | up   |
| 5698457 | 7095475 | 1116050 | --- | --- | --- | 1,06 | down |
| 5698604 | 7344836 | 1732409 | --- | --- | --- | 1,14 | up   |
| 5698691 | 7191594 | 1354232 | --- | --- | --- | 2,74 | up   |
| 5698807 | 7030863 | 962597  | --- | --- | --- | 1,37 | up   |
| 5698959 | 7083030 | 1086251 | --- | --- | --- | 1,82 | down |
| 5698981 | 7065265 | 1044557 | --- | --- | --- | 1,13 | down |
| 5699101 | 7239752 | 1473185 | --- | --- | --- | 1,40 | down |
| 5699122 | 7025652 | 950298  | --- | --- | --- | 2,29 | up   |
| 5699151 | 7120039 | 1177489 | --- | --- | --- | 1,25 | up   |
| 5699268 | 7292657 | 1602839 | --- | --- | --- | 1,21 | down |
| 5699454 | 7189689 | 1349041 | --- | --- | --- | 1,01 | up   |
| 5699689 | 7030863 | 962594  | --- | --- | --- | 1,26 | up   |
| 5699727 | 7337260 | 1712801 | --- | --- | --- | 1,49 | down |
| 5699801 | 7321414 | 1675625 | --- | --- | --- | 1,57 | down |
| 5699810 | 7031774 | 964724  | --- | --- | --- | 1,19 | down |
| 5699829 | 7291054 | 1599398 | --- | --- | --- | 1,81 | up   |
| 5699918 | 7199476 | 1374550 | --- | --- | --- | 1,10 | up   |
| 5700065 | 7378997 | 1818650 | --- | --- | --- | 1,52 | up   |
| 5700188 | 7088164 | 1098482 | --- | --- | --- | 1,35 | up   |
| 5700240 | 7326612 | 1687192 | --- | --- | --- | 1,41 | down |
| 5700331 | 7043379 | 993619  | --- | --- | --- | 1,04 | down |
| 5700362 | 7312575 | 1653352 | --- | --- | --- | 1,02 | up   |
| 5700388 | 7249503 | 1496218 | --- | --- | --- | 1,02 | down |
| 5700421 | 7365183 | 1781904 | --- | --- | --- | 1,17 | down |
| 5700486 | 7373678 | 1805858 | --- | --- | --- | 1,07 | down |
| 5700545 | 7065266 | 1044593 | --- | --- | --- | 1,28 | up   |
| 5700592 | 7354688 | 1756376 | --- | --- | --- | 1,10 | up   |
| 5700670 | 7032083 | 965661  | --- | --- | --- | 1,03 | up   |
| 5700767 | 7350993 | 1747504 | --- | --- | --- | 1,07 | up   |
| 5700784 | 7075445 | 1069341 | --- | --- | --- | 1,06 | down |
| 5700823 | 7247229 | 1490539 | --- | --- | --- | 1,40 | down |
| 5700920 | 7144389 | 1236778 | --- | --- | --- | 2,12 | down |
| 5700964 | 7097680 | 1121715 | --- | --- | --- | 1,19 | down |
| 5700979 | 7234008 | 1458358 | --- | --- | --- | 2,42 | up   |
| 5701006 | 7133612 | 1210199 | --- | --- | --- | 2,00 | down |
| 5701043 | 7139026 | 1223498 | --- | --- | --- | 1,09 | up   |
| 5701073 | 7243603 | 1482289 | --- | --- | --- | 1,19 | down |
| 5701114 | 7373417 | 1805096 | --- | --- | --- | 1,11 | up   |

|         |         |         |     |     |     |      |      |
|---------|---------|---------|-----|-----|-----|------|------|
| 5701142 | 7260613 | 1524272 | --- | --- | --- | 1,21 | down |
| 5701177 | 7248964 | 1494943 | --- | --- | --- | 1,12 | down |
| 5701188 | 7274593 | 1558817 | --- | --- | --- | 1,10 | up   |
| 5701247 | 7359551 | 1768623 | --- | --- | --- | 1,72 | up   |
| 5701267 | 7181105 | 1327967 | --- | --- | --- | 1,19 | down |
| 5701335 | 7279499 | 1571829 | --- | --- | --- | 2,28 | down |
| 5701502 | 7238202 | 1468956 | --- | --- | --- | 1,04 | down |
| 5701585 | 7248964 | 1494939 | --- | --- | --- | 1,19 | up   |
| 5701670 | 7232029 | 1452771 | --- | --- | --- | 1,57 | up   |
| 5701701 | 7132024 | 1206342 | --- | --- | --- | 1,01 | up   |
| 5701746 | 7311218 | 1650350 | --- | --- | --- | 2,20 | up   |
| 5701801 | 7038530 | 981873  | --- | --- | --- | 1,33 | up   |
| 5701897 | 7231152 | 1450262 | --- | --- | --- | 2,02 | up   |
| 5701904 | 7098810 | 1124645 | --- | --- | --- | 1,06 | down |
| 5701952 | 7371682 | 1800775 | --- | --- | --- | 1,50 | down |
| 5702010 | 7242490 | 1479427 | --- | --- | --- | 1,39 | down |
| 5702066 | 7132024 | 1206337 | --- | --- | --- | 1,49 | down |
| 5702072 | 7357890 | 1764388 | --- | --- | --- | 1,24 | up   |
| 5702147 | 7349817 | 1744599 | --- | --- | --- | 1,14 | up   |
| 5702226 | 7341253 | 1723267 | --- | --- | --- | 1,07 | down |
| 5702287 | 7368006 | 1789353 | --- | --- | --- | 1,00 | down |
| 5702339 | 7243653 | 1482523 | --- | --- | --- | 2,33 | down |
| 5702388 | 7138047 | 1221245 | --- | --- | --- | 1,07 | up   |
| 5702457 | 7052331 | 1014567 | --- | --- | --- | 1,27 | up   |
| 5702470 | 7281507 | 1576701 | --- | --- | --- | 1,01 | up   |
| 5702501 | 7098366 | 1123617 | --- | --- | --- | 1,14 | down |
| 5702547 | 7240569 | 1475323 | --- | --- | --- | 1,57 | down |
| 5702579 | 7190524 | 1351184 | --- | --- | --- | 1,03 | up   |
| 5702679 | 7357813 | 1764112 | --- | --- | --- | 1,11 | up   |
| 5702709 | 7274780 | 1559226 | --- | --- | --- | 1,11 | up   |
| 5702750 | 7275927 | 1562389 | --- | --- | --- | 1,51 | down |
| 5702782 | 7097680 | 1121740 | --- | --- | --- | 1,40 | up   |
| 5702829 | 7281507 | 1576663 | --- | --- | --- | 1,18 | down |
| 5702844 | 7281494 | 1576596 | --- | --- | --- | 1,21 | down |
| 5702856 | 7345465 | 1733819 | --- | --- | --- | 1,18 | down |
| 5702894 | 7099156 | 1125641 | --- | --- | --- | 1,27 | down |
| 5702953 | 7025652 | 950243  | --- | --- | --- | 1,05 | down |
| 5703017 | 7360325 | 1770516 | --- | --- | --- | 1,21 | up   |
| 5703056 | 7156052 | 1265754 | --- | --- | --- | 1,43 | down |
| 5703067 | 7033616 | 970211  | --- | --- | --- | 1,28 | down |
| 5703120 | 7263652 | 1531626 | --- | --- | --- | 1,47 | up   |
| 5703246 | 7354688 | 1756374 | --- | --- | --- | 1,02 | down |
| 5703310 | 7087965 | 1098050 | --- | --- | --- | 1,29 | up   |
| 5703395 | 7068259 | 1051631 | --- | --- | --- | 1,26 | down |
| 5703626 | 7340990 | 1722505 | --- | --- | --- | 1,21 | up   |
| 5703833 | 7243130 | 1480892 | --- | --- | --- | 1,07 | down |
| 5704065 | 7368986 | 1792855 | --- | --- | --- | 2,71 | down |
| 5704131 | 7321029 | 1674806 | --- | --- | --- | 1,26 | up   |
| 5704188 | 7150631 | 1252171 | --- | --- | --- | 1,18 | up   |
| 5704194 | 7226241 | 1437812 | --- | --- | --- | 1,17 | up   |
| 5704213 | 7321414 | 1675629 | --- | --- | --- | 1,23 | up   |
| 5704339 | 7059449 | 1030303 | --- | --- | --- | 1,01 | down |
| 5704383 | 7033504 | 969848  | --- | --- | --- | 1,03 | down |
| 5704405 | 7180620 | 1326403 | --- | --- | --- | 1,07 | down |
| 5704437 | 7070616 | 1057767 | --- | --- | --- | 1,24 | up   |
| 5704570 | 7153571 | 1259033 | --- | --- | --- | 1,52 | up   |

|         |         |         |     |     |     |      |      |
|---------|---------|---------|-----|-----|-----|------|------|
| 5704629 | 7059020 | 1029332 | --- | --- | --- | 1,38 | down |
| 5704637 | 7086664 | 1094287 | --- | --- | --- | 1,41 | up   |
| 5704643 | 7041609 | 989584  | --- | --- | --- | 1,05 | up   |
| 5704749 | 7369781 | 1795035 | --- | --- | --- | 1,30 | down |
| 5704898 | 7236358 | 1464246 | --- | --- | --- | 1,23 | up   |
| 5704908 | 7179859 | 1324617 | --- | --- | --- | 2,64 | down |
| 5705097 | 7025652 | 950347  | --- | --- | --- | 1,11 | down |
| 5705130 | 7075424 | 1069303 | --- | --- | --- | 1,04 | down |
| 5705340 | 7117526 | 1171034 | --- | --- | --- | 1,18 | up   |
| 5705367 | 7088164 | 1098484 | --- | --- | --- | 1,77 | down |
| 5705558 | 7316644 | 1664007 | --- | --- | --- | 1,21 | up   |
| 5705654 | 7297589 | 1615605 | --- | --- | --- | 1,36 | up   |
| 5705698 | 7027759 | 956132  | --- | --- | --- | 1,26 | down |
| 5705713 | 7181016 | 1327782 | --- | --- | --- | 1,20 | down |
| 5705746 | 7291054 | 1599396 | --- | --- | --- | 1,09 | down |
| 5705938 | 7068259 | 1051633 | --- | --- | --- | 1,24 | up   |
| 5706169 | 7345465 | 1733851 | --- | --- | --- | 1,06 | up   |
| 5706273 | 7076160 | 1070882 | --- | --- | --- | 1,34 | up   |
| 5706319 | 7231775 | 1452122 | --- | --- | --- | 1,17 | up   |
| 5706519 | 7196029 | 1365627 | --- | --- | --- | 1,22 | down |
| 5706592 | 7170764 | 1301477 | --- | --- | --- | 1,44 | up   |
| 5706598 | 7181016 | 1327790 | --- | --- | --- | 1,26 | down |
| 5706773 | 7217650 | 1417176 | --- | --- | --- | 1,60 | down |
| 5706813 | 7373678 | 1805858 | --- | --- | --- | 1,19 | down |
| 5706839 | 7181026 | 1327845 | --- | --- | --- | 1,90 | down |
| 5706945 | 7127540 | 1195291 | --- | --- | --- | 1,35 | up   |
| 5706963 | 7078666 | 1076505 | --- | --- | --- | 1,18 | up   |
| 5707275 | 7378878 | 1818321 | --- | --- | --- | 1,20 | up   |
| 5707281 | 7237719 | 1467514 | --- | --- | --- | 1,03 | up   |
| 5707286 | 7162144 | 1280511 | --- | --- | --- | 1,56 | up   |
| 5707305 | 7092549 | 1109132 | --- | --- | --- | 1,01 | down |
| 5707462 | 7143455 | 1234723 | --- | --- | --- | 1,41 | up   |
| 5707516 | 7274780 | 1559221 | --- | --- | --- | 1,36 | up   |
| 5707565 | 7344702 | 1732141 | --- | --- | --- | 1,27 | down |
| 5707779 | 7281507 | 1576717 | --- | --- | --- | 1,42 | down |
| 5707810 | 7052331 | 1014567 | --- | --- | --- | 1,89 | down |
| 5707834 | 7281950 | 1577792 | --- | --- | --- | 1,31 | up   |
| 5707853 | 7240569 | 1475376 | --- | --- | --- | 1,14 | down |
| 5707925 | 7073673 | 1065080 | --- | --- | --- | 1,40 | up   |
| 5707968 | 7331829 | 1700183 | --- | --- | --- | 1,39 | down |
| 5708008 | 7033672 | 970364  | --- | --- | --- | 1,07 | up   |
| 5708031 | 7338101 | 1715191 | --- | --- | --- | 1,12 | down |
| 5708192 | 7329513 | 1694277 | --- | --- | --- | 1,10 | up   |
| 5708276 | 7050167 | 1009828 | --- | --- | --- | 1,00 | up   |
| 5708375 | 7033504 | 969858  | --- | --- | --- | 1,04 | down |
| 5708380 | 7330181 | 1695695 | --- | --- | --- | 1,48 | down |
| 5708428 | 7297274 | 1614630 | --- | --- | --- | 1,20 | down |
| 5708503 | 7071616 | 1060070 | --- | --- | --- | 1,36 | down |
| 5708641 | 7334347 | 1705758 | --- | --- | --- | 1,07 | down |
| 5708652 | 7065110 | 1044147 | --- | --- | --- | 1,34 | up   |
| 5708799 | 7350993 | 1747546 | --- | --- | --- | 1,05 | up   |
| 5708899 | 7235521 | 1462140 | --- | --- | --- | 1,14 | up   |
| 5708953 | 7255522 | 1511384 | --- | --- | --- | 1,17 | up   |
| 5708955 | 7382452 | 1826172 | --- | --- | --- | 2,37 | up   |
| 5709036 | 7269314 | 1545625 | --- | --- | --- | 1,26 | down |
| 5709099 | 7088135 | 1098402 | --- | --- | --- | 1,15 | down |

|         |         |         |     |     |     |      |      |
|---------|---------|---------|-----|-----|-----|------|------|
| 5709345 | 7059020 | 1029345 | --- | --- | --- | 1,06 | up   |
| 5709431 | 7192307 | 1356003 | --- | --- | --- | 1,92 | down |
| 5709447 | 7167823 | 1293862 | --- | --- | --- | 1,81 | up   |
| 5709459 | 7098451 | 1123810 | --- | --- | --- | 1,00 | down |
| 5709468 | 7327169 | 1688467 | --- | --- | --- | 1,05 | down |
| 5709632 | 7161300 | 1278548 | --- | --- | --- | 1,13 | up   |
| 5709840 | 7063515 | 1039668 | --- | --- | --- | 1,85 | down |
| 5709843 | 7217650 | 1417171 | --- | --- | --- | 1,39 | up   |
| 5709965 | 7029078 | 958875  | --- | --- | --- | 1,18 | down |
| 5709977 | 7093936 | 1112475 | --- | --- | --- | 1,39 | down |
| 5710028 | 7312942 | 1654173 | --- | --- | --- | 1,14 | down |
| 5710058 | 7341546 | 1723943 | --- | --- | --- | 1,17 | up   |
| 5710086 | 7305674 | 1636823 | --- | --- | --- | 1,13 | down |
| 5710183 | 7359460 | 1768471 | --- | --- | --- | 1,23 | up   |
| 5710191 | 7351951 | 1749851 | --- | --- | --- | 1,23 | down |
| 5710308 | 7071969 | 1060894 | --- | --- | --- | 1,08 | up   |
| 5710355 | 7181193 | 1328292 | --- | --- | --- | 2,06 | down |
| 5710364 | 7092965 | 1110190 | --- | --- | --- | 1,29 | up   |
| 5710418 | 7099573 | 1126738 | --- | --- | --- | 1,07 | down |
| 5710915 | 7196029 | 1365624 | --- | --- | --- | 1,00 | up   |
| 5710932 | 7280743 | 1574536 | --- | --- | --- | 1,05 | down |
| 5711041 | 7266838 | 1539001 | --- | --- | --- | 1,59 | down |
| 5711217 | 7145669 | 1240004 | --- | --- | --- | 1,08 | down |
| 5711234 | 7339387 | 1718377 | --- | --- | --- | 1,20 | down |
| 5711259 | 7139026 | 1223497 | --- | --- | --- | 1,17 | down |
| 5711282 | 7052813 | 1015920 | --- | --- | --- | 1,10 | up   |
| 5711289 | 7235521 | 1462163 | --- | --- | --- | 1,00 | down |
| 5711311 | 7117526 | 1171033 | --- | --- | --- | 1,06 | up   |
| 5711318 | 7231152 | 1450258 | --- | --- | --- | 1,37 | up   |
| 5711368 | 7226241 | 1437799 | --- | --- | --- | 1,23 | up   |
| 5711376 | 7156052 | 1265763 | --- | --- | --- | 1,23 | up   |
| 5711443 | 7341253 | 1723310 | --- | --- | --- | 2,02 | up   |
| 5711492 | 7064468 | 1042376 | --- | --- | --- | 1,53 | down |
| 5711867 | 7319151 | 1670111 | --- | --- | --- | 2,05 | up   |
| 5711945 | 7162959 | 1282085 | --- | --- | --- | 1,12 | up   |
| 5712033 | 7200545 | 1376913 | --- | --- | --- | 2,28 | up   |
| 5712104 | 7062436 | 1037670 | --- | --- | --- | 2,30 | down |
| 5712435 | 7291853 | 1600989 | --- | --- | --- | 1,17 | down |
| 5712443 | 7217143 | 1415616 | --- | --- | --- | 1,51 | down |
| 5712452 | 7274892 | 1559570 | --- | --- | --- | 1,32 | up   |
| 5712458 | 7032083 | 965697  | --- | --- | --- | 1,04 | up   |
| 5712562 | 7156052 | 1265784 | --- | --- | --- | 1,48 | up   |
| 5712571 | 7293757 | 1605679 | --- | --- | --- | 1,16 | up   |
| 5712597 | 7179914 | 1324713 | --- | --- | --- | 1,05 | up   |
| 5712698 | 7083031 | 1086289 | --- | --- | --- | 1,12 | down |
| 5712704 | 7099449 | 1126374 | --- | --- | --- | 1,12 | up   |
| 5712802 | 7360486 | 1770988 | --- | --- | --- | 1,01 | up   |
| 5712822 | 7211389 | 1402121 | --- | --- | --- | 1,35 | down |
| 5713174 | 7293234 | 1604353 | --- | --- | --- | 1,48 | down |
| 5713184 | 7148978 | 1248456 | --- | --- | --- | 2,13 | down |
| 5713268 | 7075424 | 1069301 | --- | --- | --- | 2,17 | down |
| 5713318 | 7031774 | 964728  | --- | --- | --- | 1,50 | up   |
| 5713348 | 7199476 | 1374535 | --- | --- | --- | 1,10 | up   |
| 5713377 | 7241163 | 1476824 | --- | --- | --- | 1,78 | down |
| 5713409 | 7078273 | 1075821 | --- | --- | --- | 1,42 | up   |
| 5713417 | 7142081 | 1230952 | --- | --- | --- | 1,14 | up   |

|         |         |         |     |     |     |      |      |
|---------|---------|---------|-----|-----|-----|------|------|
| 5713424 | 7096924 | 1119603 | --- | --- | --- | 1,31 | down |
| 5713427 | 7033337 | 969497  | --- | --- | --- | 1,37 | up   |
| 5713439 | 7342959 | 1727348 | --- | --- | --- | 1,30 | up   |
| 5713510 | 7213908 | 1407762 | --- | --- | --- | 1,20 | down |
| 5713515 | 7301140 | 1624575 | --- | --- | --- | 1,33 | down |
| 5713710 | 7286807 | 1588825 | --- | --- | --- | 1,03 | down |
| 5713742 | 7111066 | 1154951 | --- | --- | --- | 2,67 | down |
| 5713773 | 7297589 | 1615687 | --- | --- | --- | 1,35 | down |
| 5713811 | 7244290 | 1484158 | --- | --- | --- | 1,12 | down |
| 5713863 | 7047524 | 1004655 | --- | --- | --- | 1,13 | down |
| 5713906 | 7352152 | 1750335 | --- | --- | --- | 2,16 | up   |
| 5713941 | 7337224 | 1712610 | --- | --- | --- | 1,63 | up   |
| 5713994 | 7256191 | 1512879 | --- | --- | --- | 1,12 | up   |
| 5714074 | 7351951 | 1749842 | --- | --- | --- | 1,02 | up   |
| 5714136 | 7330078 | 1695458 | --- | --- | --- | 1,54 | down |
| 5714344 | 7337845 | 1714331 | --- | --- | --- | 1,05 | up   |
| 5714634 | 7065655 | 1045273 | --- | --- | --- | 1,37 | down |
| 5714655 | 7287222 | 1589725 | --- | --- | --- | 1,10 | up   |
| 5714732 | 7330396 | 1696371 | --- | --- | --- | 1,02 | up   |
| 5714754 | 7342959 | 1727335 | --- | --- | --- | 1,10 | down |
| 5714801 | 7148978 | 1248463 | --- | --- | --- | 1,09 | down |
| 5714845 | 7063873 | 1040648 | --- | --- | --- | 2,07 | down |
| 5714869 | 7243653 | 1482520 | --- | --- | --- | 1,02 | down |
| 5714944 | 7053874 | 1018312 | --- | --- | --- | 1,01 | down |
| 5715056 | 7210263 | 1399767 | --- | --- | --- | 1,15 | down |
| 5715070 | 7261668 | 1526982 | --- | --- | --- | 2,20 | down |
| 5715196 | 7131360 | 1204984 | --- | --- | --- | 2,42 | down |
| 5715277 | 7334331 | 1705688 | --- | --- | --- | 1,33 | up   |
| 5715386 | 7053874 | 1018313 | --- | --- | --- | 1,07 | down |
| 5715421 | 7206133 | 1389968 | --- | --- | --- | 1,35 | down |
| 5715501 | 7254040 | 1507594 | --- | --- | --- | 1,04 | down |
| 5715521 | 7261592 | 1526856 | --- | --- | --- | 2,17 | up   |
| 5715585 | 7312621 | 1653459 | --- | --- | --- | 1,05 | up   |
| 5715617 | 7343122 | 1727744 | --- | --- | --- | 1,73 | down |
| 5715733 | 7243130 | 1480913 | --- | --- | --- | 1,13 | up   |
| 5715735 | 7380497 | 1821865 | --- | --- | --- | 1,48 | up   |
| 5715786 | 7062173 | 1036995 | --- | --- | --- | 1,79 | up   |
| 5715800 | 7052813 | 1015918 | --- | --- | --- | 1,26 | down |
| 5715820 | 7127540 | 1195284 | --- | --- | --- | 1,13 | down |
| 5715926 | 7239939 | 1473794 | --- | --- | --- | 1,37 | up   |
| 5715928 | 7355220 | 1758099 | --- | --- | --- | 1,07 | down |
| 5715990 | 7339379 | 1718340 | --- | --- | --- | 1,90 | down |
| 5716002 | 7294264 | 1606845 | --- | --- | --- | 1,10 | down |
| 5716108 | 7251608 | 1501464 | --- | --- | --- | 2,13 | down |
| 5716115 | 7368986 | 1792880 | --- | --- | --- | 1,63 | down |
| 5716163 | 7032444 | 966736  | --- | --- | --- | 1,30 | down |
| 5716264 | 7113483 | 1161006 | --- | --- | --- | 1,09 | down |
| 5716453 | 7356027 | 1759977 | --- | --- | --- | 1,50 | up   |
| 5716615 | 7243130 | 1480830 | --- | --- | --- | 1,18 | up   |
| 5716618 | 7280743 | 1574486 | --- | --- | --- | 1,98 | up   |
| 5716698 | 7196029 | 1365616 | --- | --- | --- | 3,00 | down |
| 5716715 | 7111066 | 1154964 | --- | --- | --- | 1,28 | up   |
| 5716841 | 7240569 | 1475448 | --- | --- | --- | 1,13 | down |
| 5716871 | 7198210 | 1371009 | --- | --- | --- | 2,16 | down |
| 5716888 | 7341546 | 1723973 | --- | --- | --- | 1,04 | down |
| 5717081 | 7067828 | 1050798 | --- | --- | --- | 1,11 | up   |

|         |         |         |     |     |     |      |      |
|---------|---------|---------|-----|-----|-----|------|------|
| 5717283 | 7047524 | 1004666 | --- | --- | --- | 1,18 | up   |
| 5717491 | 7230886 | 1449527 | --- | --- | --- | 1,18 | up   |
| 5717493 | 7087492 | 1096688 | --- | --- | --- | 1,64 | up   |
| 5717502 | 7040260 | 986085  | --- | --- | --- | 2,70 | up   |
| 5717512 | 7115880 | 1166836 | --- | --- | --- | 1,28 | down |
| 5717523 | 7112566 | 1158635 | --- | --- | --- | 1,44 | up   |
| 5717614 | 7053874 | 1018318 | --- | --- | --- | 1,02 | up   |
| 5717664 | 7276231 | 1563100 | --- | --- | --- | 1,03 | down |
| 5717701 | 7236492 | 1464559 | --- | --- | --- | 1,02 | up   |
| 5717714 | 7206133 | 1389977 | --- | --- | --- | 1,19 | down |
| 5717765 | 7071264 | 1059296 | --- | --- | --- | 2,03 | up   |
| 5717781 | 7294264 | 1606853 | --- | --- | --- | 1,01 | down |
| 5717800 | 7358048 | 1764817 | --- | --- | --- | 1,21 | down |
| 5717815 | 7112225 | 1157547 | --- | --- | --- | 1,37 | up   |
| 5717901 | 7331434 | 1699205 | --- | --- | --- | 1,19 | up   |
| 5718030 | 7156061 | 1265840 | --- | --- | --- | 1,19 | down |
| 5718204 | 7059020 | 1029331 | --- | --- | --- | 1,32 | down |
| 5718213 | 7047865 | 1005359 | --- | --- | --- | 1,24 | down |
| 5718296 | 7108974 | 1149795 | --- | --- | --- | 1,08 | up   |
| 5718310 | 7148978 | 1248450 | --- | --- | --- | 1,42 | up   |
| 5718373 | 7131360 | 1204969 | --- | --- | --- | 1,75 | up   |
| 5718457 | 7193644 | 1359710 | --- | --- | --- | 1,24 | down |
| 5718479 | 7367971 | 1789126 | --- | --- | --- | 1,05 | down |
| 5718503 | 7230886 | 1449578 | --- | --- | --- | 1,10 | up   |
| 5718619 | 7189669 | 1348982 | --- | --- | --- | 1,46 | down |
| 5718665 | 7115880 | 1166824 | --- | --- | --- | 1,05 | up   |
| 5718743 | 7203872 | 1384765 | --- | --- | --- | 1,26 | down |
| 5718767 | 7328833 | 1692773 | --- | --- | --- | 1,06 | up   |
| 5718913 | 7115880 | 1166827 | --- | --- | --- | 1,30 | up   |
| 5719053 | 7377583 | 1815460 | --- | --- | --- | 1,18 | up   |
| 5719110 | 7108300 | 1147898 | --- | --- | --- | 1,06 | up   |
| 5719468 | 7156052 | 1265784 | --- | --- | --- | 1,07 | down |
| 5719503 | 7056304 | 1023602 | --- | --- | --- | 1,02 | up   |
| 5719533 | 7332059 | 1700733 | --- | --- | --- | 1,07 | down |
| 5719578 | 7193644 | 1359708 | --- | --- | --- | 1,12 | down |
| 5719650 | 7180732 | 1326726 | --- | --- | --- | 1,03 | up   |
| 5719688 | 7269641 | 1546250 | --- | --- | --- | 1,52 | down |
| 5719742 | 7384509 | 1830731 | --- | --- | --- | 2,79 | up   |
| 5719825 | 7182324 | 1331462 | --- | --- | --- | 1,08 | down |
| 5720121 | 7186440 | 1341252 | --- | --- | --- | 1,20 | up   |
| 5720298 | 7131360 | 1204989 | --- | --- | --- | 1,60 | down |
| 5720414 | 7200545 | 1376915 | --- | --- | --- | 1,29 | down |
| 5720447 | 7142081 | 1230972 | --- | --- | --- | 1,06 | down |
| 5720479 | 7025652 | 950257  | --- | --- | --- | 1,50 | down |
| 5720551 | 7171525 | 1303468 | --- | --- | --- | 1,07 | up   |
| 5720578 | 7351951 | 1749851 | --- | --- | --- | 1,47 | down |
| 5720611 | 7121866 | 1181874 | --- | --- | --- | 1,16 | down |
| 5720621 | 7226241 | 1437794 | --- | --- | --- | 1,04 | up   |
| 5720705 | 7068853 | 1053106 | --- | --- | --- | 1,06 | down |
| 5720747 | 7098810 | 1124652 | --- | --- | --- | 1,28 | down |
| 5720776 | 7274892 | 1559558 | --- | --- | --- | 1,16 | down |
| 5720798 | 7047865 | 1005354 | --- | --- | --- | 1,01 | down |
| 5720801 | 7156978 | 1268174 | --- | --- | --- | 1,44 | down |
| 5720805 | 7243653 | 1482520 | --- | --- | --- | 1,23 | down |
| 5720890 | 7240206 | 1474351 | --- | --- | --- | 1,07 | up   |
| 5720916 | 7240206 | 1474361 | --- | --- | --- | 1,48 | down |

|         |         |         |     |     |     |      |      |
|---------|---------|---------|-----|-----|-----|------|------|
| 5720958 | 7115880 | 1166838 | --- | --- | --- | 1,63 | down |
| 5720985 | 7095021 | 1115123 | --- | --- | --- | 2,26 | down |
| 5721128 | 7162177 | 1280576 | --- | --- | --- | 1,04 | up   |
| 5721210 | 7119930 | 1177222 | --- | --- | --- | 1,13 | up   |
| 5721232 | 7049399 | 1008380 | --- | --- | --- | 1,05 | down |
| 5721234 | 7213908 | 1407659 | --- | --- | --- | 1,02 | down |
| 5721244 | 7075424 | 1069279 | --- | --- | --- | 1,27 | up   |
| 5721270 | 7224166 | 1432686 | --- | --- | --- | 1,45 | up   |
| 5721317 | 7363568 | 1778131 | --- | --- | --- | 1,40 | down |
| 5721334 | 7325674 | 1685226 | --- | --- | --- | 1,21 | up   |
| 5721355 | 7097680 | 1121733 | --- | --- | --- | 2,17 | down |
| 5721588 | 7273251 | 1555948 | --- | --- | --- | 1,14 | up   |
| 5721604 | 7073854 | 1065634 | --- | --- | --- | 1,36 | down |
| 5721653 | 7243647 | 1482453 | --- | --- | --- | 1,59 | up   |
| 5721702 | 7181193 | 1328293 | --- | --- | --- | 2,11 | down |
| 5721806 | 7232340 | 1453521 | --- | --- | --- | 1,12 | up   |
| 5721853 | 7240569 | 1475387 | --- | --- | --- | 1,18 | down |
| 5722079 | 7341646 | 1724197 | --- | --- | --- | 1,01 | up   |
| 5722175 | 7321414 | 1675627 | --- | --- | --- | 1,36 | up   |
| 5722198 | 7224035 | 1432387 | --- | --- | --- | 1,05 | up   |
| 5722224 | 7082098 | 1084115 | --- | --- | --- | 1,02 | up   |
| 5722225 | 7113483 | 1161016 | --- | --- | --- | 1,06 | down |
| 5722273 | 7373678 | 1805873 | --- | --- | --- | 1,07 | up   |
| 5722361 | 7359551 | 1768626 | --- | --- | --- | 1,07 | up   |
| 5722393 | 7247229 | 1490558 | --- | --- | --- | 1,22 | up   |
| 5722409 | 7384365 | 1830277 | --- | --- | --- | 1,01 | up   |
| 5722415 | 7249503 | 1496216 | --- | --- | --- | 1,10 | down |
| 5722424 | 7287238 | 1589775 | --- | --- | --- | 1,15 | up   |
| 5722451 | 7139708 | 1225061 | --- | --- | --- | 1,07 | up   |
| 5722474 | 7321414 | 1675632 | --- | --- | --- | 1,04 | down |
| 5722484 | 7039589 | 984514  | --- | --- | --- | 1,28 | down |
| 5722492 | 7247228 | 1490511 | --- | --- | --- | 1,05 | up   |
| 5722519 | 7238202 | 1468953 | --- | --- | --- | 1,02 | down |
| 5722520 | 7093936 | 1112462 | --- | --- | --- | 2,01 | down |
| 5722588 | 7247228 | 1490524 | --- | --- | --- | 1,16 | up   |
| 5722670 | 7059375 | 1030077 | --- | --- | --- | 1,23 | down |
| 5722695 | 7341397 | 1723626 | --- | --- | --- | 1,15 | down |
| 5722840 | 7150348 | 1251434 | --- | --- | --- | 1,15 | down |
| 5722891 | 7049399 | 1008335 | --- | --- | --- | 1,56 | down |
| 5723027 | 7206133 | 1389969 | --- | --- | --- | 1,06 | down |
| 5723090 | 7099449 | 1126383 | --- | --- | --- | 1,09 | down |
| 5723133 | 7029770 | 960158  | --- | --- | --- | 1,10 | up   |
| 5723144 | 7032204 | 966120  | --- | --- | --- | 1,42 | up   |
| 5723185 | 7350237 | 1745480 | --- | --- | --- | 1,26 | up   |
| 5723309 | 7273744 | 1556975 | --- | --- | --- | 1,20 | down |
| 5723310 | 7182713 | 1332553 | --- | --- | --- | 1,92 | up   |
| 5723363 | 7303616 | 1631372 | --- | --- | --- | 1,34 | down |
| 5723405 | 7115362 | 1165598 | --- | --- | --- | 1,05 | down |
| 5723448 | 7301140 | 1624583 | --- | --- | --- | 1,06 | down |
| 5723542 | 7329135 | 1693495 | --- | --- | --- | 2,18 | down |
| 5723731 | 7340506 | 1721336 | --- | --- | --- | 1,05 | up   |
| 5723745 | 7240569 | 1475494 | --- | --- | --- | 1,17 | up   |
| 5723954 | 7188829 | 1346668 | --- | --- | --- | 1,04 | up   |
| 5724087 | 7093936 | 1112465 | --- | --- | --- | 1,49 | down |
| 5724108 | 7069830 | 1055633 | --- | --- | --- | 1,26 | up   |
| 5724144 | 7092406 | 1108781 | --- | --- | --- | 1,16 | up   |



|         |         |         |     |     |     |      |      |
|---------|---------|---------|-----|-----|-----|------|------|
| 5724234 | 7297274 | 1614642 | --- | --- | --- | 1,16 | up   |
| 5724290 | 7331434 | 1699211 | --- | --- | --- | 1,09 | down |
| 5724371 | 7225304 | 1435317 | --- | --- | --- | 1,03 | down |
| 5724376 | 7049399 | 1008406 | --- | --- | --- | 1,25 | up   |
| 5724537 | 7292100 | 1601540 | --- | --- | --- | 1,38 | up   |
| 5724559 | 7238202 | 1468940 | --- | --- | --- | 1,02 | up   |
| 5724565 | 7031774 | 964707  | --- | --- | --- | 1,23 | up   |
| 5724614 | 7373633 | 1805696 | --- | --- | --- | 1,16 | down |
| 5724639 | 7357815 | 1764147 | --- | --- | --- | 1,14 | up   |
| 5724683 | 7368684 | 1791854 | --- | --- | --- | 1,82 | up   |
| 5724706 | 7271128 | 1550314 | --- | --- | --- | 1,13 | down |
| 5724749 | 7277719 | 1567093 | --- | --- | --- | 1,04 | up   |
| 5724776 | 7183927 | 1335497 | --- | --- | --- | 1,34 | down |
| 5724842 | 7338807 | 1716793 | --- | --- | --- | 1,38 | down |
| 5724910 | 7341394 | 1723613 | --- | --- | --- | 1,12 | up   |
| 5725078 | 7159642 | 1274219 | --- | --- | --- | 1,49 | down |
| 5725092 | 7088625 | 1099875 | --- | --- | --- | 1,09 | up   |
| 5725203 | 7073673 | 1065088 | --- | --- | --- | 1,02 | up   |
| 5725244 | 7243647 | 1482476 | --- | --- | --- | 1,27 | up   |
| 5725272 | 7150631 | 1252165 | --- | --- | --- | 1,02 | up   |
| 5725302 | 7351951 | 1749825 | --- | --- | --- | 1,26 | up   |
| 5725345 | 7384509 | 1830741 | --- | --- | --- | 1,07 | up   |
| 5725385 | 7112225 | 1157531 | --- | --- | --- | 1,13 | down |
| 5725393 | 7261668 | 1526983 | --- | --- | --- | 1,03 | down |
| 5725496 | 7064134 | 1041445 | --- | --- | --- | 1,05 | down |
| 5725598 | 7060851 | 1033429 | --- | --- | --- | 1,03 | down |
| 5725626 | 7358708 | 1766593 | --- | --- | --- | 1,22 | up   |
| 5725671 | 7368004 | 1789335 | --- | --- | --- | 2,10 | down |
| 5725685 | 7336931 | 1711853 | --- | --- | --- | 1,22 | up   |
| 5725754 | 7090278 | 1104136 | --- | --- | --- | 1,09 | up   |
| 5725827 | 7380497 | 1821867 | --- | --- | --- | 1,00 | up   |
| 5725878 | 7068259 | 1051614 | --- | --- | --- | 1,90 | down |
| 5725950 | 7148978 | 1248510 | --- | --- | --- | 1,27 | up   |
| 5725971 | 7236254 | 1464064 | --- | --- | --- | 1,09 | up   |
| 5725975 | 7375958 | 1811479 | --- | --- | --- | 3,42 | up   |
| 5726007 | 7168519 | 1295878 | --- | --- | --- | 1,71 | down |
| 5726022 | 7192696 | 1357177 | --- | --- | --- | 1,14 | down |
| 5726218 | 7159027 | 1272743 | --- | --- | --- | 1,03 | down |
| 5726230 | 7148978 | 1248484 | --- | --- | --- | 1,61 | up   |
| 5726261 | 7364346 | 1780012 | --- | --- | --- | 1,19 | up   |
| 5726287 | 7294264 | 1606844 | --- | --- | --- | 1,04 | up   |
| 5726438 | 7369712 | 1794830 | --- | --- | --- | 1,33 | up   |
| 5726444 | 7133612 | 1210204 | --- | --- | --- | 1,21 | up   |
| 5726476 | 7257963 | 1517683 | --- | --- | --- | 1,30 | up   |
| 5726611 | 7279793 | 1572538 | --- | --- | --- | 1,24 | down |
| 5726629 | 7363674 | 1778450 | --- | --- | --- | 1,38 | down |
| 5726713 | 7033672 | 970352  | --- | --- | --- | 1,41 | up   |
| 5726724 | 7028624 | 957992  | --- | --- | --- | 1,35 | down |
| 5726748 | 7351951 | 1749819 | --- | --- | --- | 1,18 | up   |
| 5726759 | 7331297 | 1698808 | --- | --- | --- | 1,47 | up   |
| 5726789 | 7105814 | 1141774 | --- | --- | --- | 1,06 | up   |
| 5726805 | 7238826 | 1470532 | --- | --- | --- | 2,10 | down |
| 5726975 | 7059449 | 1030305 | --- | --- | --- | 1,10 | up   |
| 5726977 | 7297589 | 1615687 | --- | --- | --- | 1,22 | up   |
| 5727210 | 7240665 | 1475821 | --- | --- | --- | 2,58 | down |
| 5727334 | 7274780 | 1559225 | --- | --- | --- | 1,52 | up   |

|         |         |         |     |     |     |      |      |
|---------|---------|---------|-----|-----|-----|------|------|
| 5727400 | 7193644 | 1359709 | --- | --- | --- | 1,39 | up   |
| 5727420 | 7095021 | 1115133 | --- | --- | --- | 1,20 | up   |
| 5727442 | 7370412 | 1796840 | --- | --- | --- | 1,06 | down |
| 5727454 | 7363576 | 1778195 | --- | --- | --- | 1,09 | up   |
| 5727491 | 7238202 | 1468954 | --- | --- | --- | 1,61 | up   |
| 5727553 | 7068853 | 1053112 | --- | --- | --- | 2,41 | down |
| 5727721 | 7067670 | 1050319 | --- | --- | --- | 1,03 | up   |
| 5727754 | 7162144 | 1280512 | --- | --- | --- | 1,04 | up   |
| 5727873 | 7047865 | 1005354 | --- | --- | --- | 1,79 | down |
| 5727944 | 7339379 | 1718353 | --- | --- | --- | 1,06 | up   |
| 5728034 | 7132125 | 1206634 | --- | --- | --- | 1,08 | down |
| 5728271 | 7367990 | 1789220 | --- | --- | --- | 1,00 | down |
| 5728300 | 7281923 | 1577692 | --- | --- | --- | 1,01 | up   |
| 5728346 | 7189689 | 1349028 | --- | --- | --- | 1,44 | up   |
| 5728448 | 7196803 | 1367334 | --- | --- | --- | 2,22 | up   |
| 5728499 | 7028624 | 958002  | --- | --- | --- | 2,63 | down |
| 5728584 | 7322260 | 1677067 | --- | --- | --- | 1,14 | down |
| 5728852 | 7170764 | 1301485 | --- | --- | --- | 1,06 | down |
| 5728866 | 7193644 | 1359710 | --- | --- | --- | 2,52 | up   |
| 5729003 | 7038969 | 982976  | --- | --- | --- | 1,34 | down |
| 5729034 | 7297589 | 1615604 | --- | --- | --- | 1,06 | down |
| 5729198 | 7341002 | 1722541 | --- | --- | --- | 1,40 | up   |
| 5729208 | 7115362 | 1165598 | --- | --- | --- | 1,01 | down |
| 5729235 | 7374842 | 1808974 | --- | --- | --- | 2,41 | down |
| 5729312 | 7321029 | 1674805 | --- | --- | --- | 1,36 | up   |
| 5729384 | 7297589 | 1615615 | --- | --- | --- | 1,23 | down |
| 5729456 | 7061367 | 1034849 | --- | --- | --- | 1,30 | up   |
| 5729507 | 7203872 | 1384776 | --- | --- | --- | 1,24 | up   |
| 5729611 | 7248790 | 1494546 | --- | --- | --- | 1,31 | up   |
| 5729614 | 7337522 | 1713595 | --- | --- | --- | 1,67 | down |
| 5729760 | 7287222 | 1589726 | --- | --- | --- | 1,18 | down |
| 5729816 | 7069830 | 1055623 | --- | --- | --- | 1,13 | up   |
| 5729987 | 7119930 | 1177226 | --- | --- | --- | 1,04 | down |
| 5730113 | 7273251 | 1555960 | --- | --- | --- | 1,30 | down |
| 5730118 | 7361223 | 1772612 | --- | --- | --- | 1,13 | up   |
| 5730133 | 7341253 | 1723316 | --- | --- | --- | 1,00 | down |
| 5730172 | 7329135 | 1693494 | --- | --- | --- | 1,39 | down |
| 5730206 | 7253088 | 1505112 | --- | --- | --- | 1,03 | up   |
| 5730281 | 7253088 | 1505114 | --- | --- | --- | 1,29 | up   |
| 5730569 | 7054958 | 1020580 | --- | --- | --- | 1,62 | up   |
| 5730605 | 7141421 | 1229477 | --- | --- | --- | 1,20 | up   |
| 5730678 | 7062173 | 1037018 | --- | --- | --- | 2,06 | down |
| 5730881 | 7258520 | 1518878 | --- | --- | --- | 1,00 | down |
| 5730894 | 7059020 | 1029351 | --- | --- | --- | 1,10 | down |
| 5730924 | 7059766 | 1030980 | --- | --- | --- | 1,42 | up   |
| 5730929 | 7115362 | 1165598 | --- | --- | --- | 1,24 | down |
| 5730951 | 7211363 | 1402042 | --- | --- | --- | 1,05 | down |
| 5731011 | 7036870 | 977870  | --- | --- | --- | 2,25 | down |
| 5731037 | 7176409 | 1315677 | --- | --- | --- | 1,16 | up   |
| 5731038 | 7188138 | 1345000 | --- | --- | --- | 1,24 | up   |
| 5731039 | 7279568 | 1572008 | --- | --- | --- | 1,01 | up   |
| 5731164 | 7326612 | 1687200 | --- | --- | --- | 1,11 | down |
| 5731243 | 7083030 | 1086249 | --- | --- | --- | 1,20 | down |
| 5731265 | 7176177 | 1315144 | --- | --- | --- | 1,16 | down |
| 5731292 | 7359426 | 1768356 | --- | --- | --- | 1,87 | up   |
| 5731346 | 7243628 | 1482390 | --- | --- | --- | 1,14 | down |

|         |         |         |     |     |     |      |      |
|---------|---------|---------|-----|-----|-----|------|------|
| 5731565 | 7087965 | 1098058 | --- | --- | --- | 1,14 | down |
| 5731592 | 7376206 | 1811982 | --- | --- | --- | 1,00 | down |
| 5731594 | 7297589 | 1615666 | --- | --- | --- | 1,26 | down |
| 5731692 | 7196029 | 1365622 | --- | --- | --- | 1,12 | up   |
| 5731740 | 7033616 | 970193  | --- | --- | --- | 1,11 | down |
| 5731749 | 7065266 | 1044595 | --- | --- | --- | 1,04 | up   |
| 5731865 | 7248790 | 1494492 | --- | --- | --- | 1,46 | down |
| 5731906 | 7237711 | 1467461 | --- | --- | --- | 1,17 | down |
| 5731986 | 7237132 | 1466106 | --- | --- | --- | 1,17 | down |
| 5732055 | 7217650 | 1417178 | --- | --- | --- | 1,14 | down |
| 5732061 | 7356027 | 1759980 | --- | --- | --- | 1,19 | up   |
| 5732094 | 7207069 | 1392026 | --- | --- | --- | 1,04 | down |
| 5732102 | 7096859 | 1119319 | --- | --- | --- | 1,38 | down |
| 5732152 | 7280743 | 1574559 | --- | --- | --- | 1,10 | down |
| 5732334 | 7248790 | 1494520 | --- | --- | --- | 1,05 | down |
| 5732345 | 7239752 | 1473151 | --- | --- | --- | 1,12 | up   |
| 5732568 | 7319937 | 1672295 | --- | --- | --- | 1,02 | down |
| 5732594 | 7211343 | 1401971 | --- | --- | --- | 1,06 | down |
| 5732635 | 7065655 | 1045241 | --- | --- | --- | 1,15 | up   |
| 5732644 | 7281950 | 1577791 | --- | --- | --- | 2,39 | up   |
| 5732653 | 7326612 | 1687198 | --- | --- | --- | 1,04 | up   |
| 5732718 | 7330396 | 1696401 | --- | --- | --- | 1,35 | up   |
| 5732798 | 7028624 | 957996  | --- | --- | --- | 1,03 | up   |
| 5732835 | 7200490 | 1376795 | --- | --- | --- | 1,13 | up   |
| 5732912 | 7346505 | 1736287 | --- | --- | --- | 1,20 | down |
| 5732940 | 7181871 | 1330172 | --- | --- | --- | 1,44 | up   |
| 5733019 | 7358053 | 1764842 | --- | --- | --- | 1,22 | down |
| 5733117 | 7146000 | 1240661 | --- | --- | --- | 2,04 | down |
| 5733125 | 7297483 | 1615281 | --- | --- | --- | 1,29 | down |
| 5733154 | 7196803 | 1367328 | --- | --- | --- | 1,01 | up   |
| 5733185 | 7236395 | 1464340 | --- | --- | --- | 1,26 | up   |
| 5733258 | 7193644 | 1359714 | --- | --- | --- | 1,00 | down |
| 5733280 | 7240569 | 1475472 | --- | --- | --- | 1,51 | down |
| 5733379 | 7068259 | 1051593 | --- | --- | --- | 1,88 | down |
| 5733506 | 7168858 | 1296818 | --- | --- | --- | 1,47 | up   |
| 5733676 | 7162959 | 1282082 | --- | --- | --- | 1,68 | down |
| 5733704 | 7031774 | 964738  | --- | --- | --- | 1,04 | down |
| 5733742 | 7153571 | 1259033 | --- | --- | --- | 1,71 | up   |
| 5733888 | 7097485 | 1120937 | --- | --- | --- | 1,87 | down |
| 5733958 | 7240569 | 1475469 | --- | --- | --- | 1,61 | down |
| 5734007 | 7331297 | 1698810 | --- | --- | --- | 1,21 | up   |
| 5734171 | 7364948 | 1781227 | --- | --- | --- | 1,08 | up   |
| 5734393 | 7025652 | 950327  | --- | --- | --- | 1,05 | down |
| 5734400 | 7232340 | 1453523 | --- | --- | --- | 1,21 | up   |
| 5734410 | 7049399 | 1008333 | --- | --- | --- | 1,17 | up   |
| 5734484 | 7248790 | 1494490 | --- | --- | --- | 1,12 | up   |
| 5734491 | 7094130 | 1112871 | --- | --- | --- | 1,02 | up   |
| 5734931 | 7067828 | 1050786 | --- | --- | --- | 1,05 | down |
| 5734938 | 7140113 | 1226063 | --- | --- | --- | 1,20 | up   |
| 5734997 | 7059020 | 1029336 | --- | --- | --- | 1,23 | up   |
| 5735066 | 7207069 | 1392028 | --- | --- | --- | 2,10 | down |
| 5735135 | 7067670 | 1050330 | --- | --- | --- | 1,56 | down |
| 5735259 | 7038530 | 981877  | --- | --- | --- | 1,15 | down |
| 5735294 | 7193056 | 1358272 | --- | --- | --- | 1,03 | up   |
| 5735312 | 7321204 | 1675169 | --- | --- | --- | 1,09 | down |
| 5735321 | 7283819 | 1582121 | --- | --- | --- | 1,01 | down |

|         |         |         |     |     |     |      |      |
|---------|---------|---------|-----|-----|-----|------|------|
| 5735367 | 7068853 | 1053116 | --- | --- | --- | 1,41 | up   |
| 5735467 | 7296131 | 1611488 | --- | --- | --- | 1,13 | up   |
| 5735548 | 7059584 | 1030546 | --- | --- | --- | 1,51 | down |
| 5735622 | 7320337 | 1673332 | --- | --- | --- | 1,20 | up   |
| 5735963 | 7068259 | 1051612 | --- | --- | --- | 1,82 | down |
| 5735999 | 7249503 | 1496170 | --- | --- | --- | 1,10 | down |
| 5736087 | 7279533 | 1571916 | --- | --- | --- | 1,05 | down |
| 5736246 | 7092549 | 1109154 | --- | --- | --- | 1,65 | down |
| 5736283 | 7174149 | 1310518 | --- | --- | --- | 1,05 | up   |
| 5736341 | 7067670 | 1050345 | --- | --- | --- | 1,51 | down |
| 5736357 | 7370843 | 1798377 | --- | --- | --- | 3,13 | down |
| 5736569 | 7196029 | 1365636 | --- | --- | --- | 1,67 | up   |
| 5736588 | 7038530 | 981860  | --- | --- | --- | 1,30 | up   |
| 5736594 | 7177520 | 1318612 | --- | --- | --- | 1,46 | down |
| 5736613 | 7336931 | 1711855 | --- | --- | --- | 1,11 | down |
| 5736702 | 7226241 | 1437804 | --- | --- | --- | 1,26 | up   |
| 5736738 | 7193056 | 1358279 | --- | --- | --- | 2,43 | up   |
| 5736750 | 7177180 | 1317764 | --- | --- | --- | 1,44 | down |
| 5736881 | 7338807 | 1716831 | --- | --- | --- | 1,06 | down |
| 5736922 | 7065265 | 1044564 | --- | --- | --- | 1,05 | up   |
| 5737081 | 7226241 | 1437771 | --- | --- | --- | 1,05 | down |
| 5737150 | 7376566 | 1812846 | --- | --- | --- | 1,24 | down |
| 5737155 | 7253408 | 1505945 | --- | --- | --- | 1,05 | down |
| 5737198 | 7059702 | 1030771 | --- | --- | --- | 1,29 | down |
| 5737211 | 7039223 | 983577  | --- | --- | --- | 1,45 | up   |
| 5737275 | 7069830 | 1055591 | --- | --- | --- | 1,48 | down |
| 5737278 | 7168519 | 1295873 | --- | --- | --- | 1,29 | down |
| 5737501 | 7331434 | 1699204 | --- | --- | --- | 1,14 | up   |
| 5737508 | 7189574 | 1348710 | --- | --- | --- | 1,10 | down |
| 5737522 | 7342959 | 1727334 | --- | --- | --- | 1,09 | down |
| 5737545 | 7092549 | 1109175 | --- | --- | --- | 1,35 | up   |
| 5737561 | 7385253 | 1832223 | --- | --- | --- | 1,18 | up   |
| 5737596 | 7041061 | 988075  | --- | --- | --- | 1,00 | down |
| 5737602 | 7351951 | 1749852 | --- | --- | --- | 1,24 | down |
| 5737611 | 7236254 | 1464061 | --- | --- | --- | 1,38 | down |
| 5737653 | 7186464 | 1341380 | --- | --- | --- | 1,57 | down |
| 5737844 | 7056333 | 1023686 | --- | --- | --- | 1,11 | up   |
| 5737853 | 7039223 | 983561  | --- | --- | --- | 1,04 | down |
| 5737862 | 7247848 | 1492073 | --- | --- | --- | 1,53 | up   |
| 5737931 | 7068697 | 1052768 | --- | --- | --- | 1,20 | down |
| 5738000 | 7050726 | 1011260 | --- | --- | --- | 1,07 | up   |
| 5738025 | 7282343 | 1578686 | --- | --- | --- | 1,87 | up   |
| 5738109 | 7247954 | 1492389 | --- | --- | --- | 1,92 | up   |
| 5738126 | 7084993 | 1090692 | --- | --- | --- | 1,01 | up   |
| 5738223 | 7049689 | 1008873 | --- | --- | --- | 1,11 | down |
| 5738271 | 7296131 | 1611503 | --- | --- | --- | 1,87 | up   |
| 5738290 | 7099573 | 1126731 | --- | --- | --- | 1,12 | down |
| 5738294 | 7281923 | 1577699 | --- | --- | --- | 1,41 | down |
| 5738324 | 7181105 | 1327967 | --- | --- | --- | 1,29 | up   |
| 5738334 | 7080731 | 1080978 | --- | --- | --- | 1,07 | down |
| 5738475 | 7218728 | 1419924 | --- | --- | --- | 1,14 | up   |
| 5738533 | 7036559 | 977243  | --- | --- | --- | 1,09 | up   |
| 5738629 | 7267802 | 1541732 | --- | --- | --- | 1,77 | up   |
| 5738631 | 7243130 | 1480827 | --- | --- | --- | 1,02 | down |
| 5738674 | 7331719 | 1699913 | --- | --- | --- | 1,38 | up   |
| 5738755 | 7301140 | 1624574 | --- | --- | --- | 1,31 | down |

|         |         |         |     |     |     |      |      |
|---------|---------|---------|-----|-----|-----|------|------|
| 5738818 | 7181105 | 1327966 | --- | --- | --- | 1,02 | down |
| 5738829 | 7068853 | 1053113 | --- | --- | --- | 1,26 | down |
| 5738876 | 7047865 | 1005352 | --- | --- | --- | 1,09 | down |
| 5739111 | 7333100 | 1702838 | --- | --- | --- | 1,40 | up   |
| 5739200 | 7237438 | 1466793 | --- | --- | --- | 1,17 | down |
| 5739230 | 7112225 | 1157537 | --- | --- | --- | 1,03 | down |
| 5739238 | 7212735 | 1405006 | --- | --- | --- | 1,60 | up   |
| 5739247 | 7068259 | 1051625 | --- | --- | --- | 1,89 | down |
| 5739314 | 7141061 | 1228696 | --- | --- | --- | 1,14 | down |
| 5739324 | 7292517 | 1602559 | --- | --- | --- | 1,15 | down |
| 5739399 | 7043535 | 994092  | --- | --- | --- | 1,19 | down |
| 5739402 | 7105375 | 1140970 | --- | --- | --- | 1,27 | down |
| 5739416 | 7289856 | 1596332 | --- | --- | --- | 1,20 | up   |
| 5739433 | 7346066 | 1735283 | --- | --- | --- | 1,06 | up   |
| 5739511 | 7340304 | 1720853 | --- | --- | --- | 1,73 | down |
| 5739704 | 7353712 | 1753946 | --- | --- | --- | 1,03 | down |
| 5739723 | 7258520 | 1518858 | --- | --- | --- | 1,10 | up   |
| 5739734 | 7188822 | 1346613 | --- | --- | --- | 1,12 | down |
| 5739820 | 7350237 | 1745492 | --- | --- | --- | 1,53 | up   |
| 5739833 | 7075445 | 1069359 | --- | --- | --- | 1,22 | down |
| 5739914 | 7069830 | 1055616 | --- | --- | --- | 1,18 | down |
| 5739929 | 7068697 | 1052766 | --- | --- | --- | 1,46 | down |
| 5739996 | 7268736 | 1544315 | --- | --- | --- | 1,14 | up   |
| 5740035 | 7074989 | 1068375 | --- | --- | --- | 1,02 | up   |
| 5740179 | 7125348 | 1190100 | --- | --- | --- | 1,91 | down |
| 5740222 | 7210387 | 1400036 | --- | --- | --- | 1,01 | up   |
| 5740328 | 7384509 | 1830746 | --- | --- | --- | 1,14 | up   |
| 5740557 | 7376206 | 1811975 | --- | --- | --- | 1,15 | up   |
| 5740628 | 7108345 | 1148063 | --- | --- | --- | 1,27 | up   |
| 5740719 | 7267802 | 1541754 | --- | --- | --- | 1,65 | up   |
| 5740721 | 7255522 | 1511454 | --- | --- | --- | 1,07 | up   |
| 5740839 | 7191594 | 1354232 | --- | --- | --- | 1,13 | down |
| 5740919 | 7054958 | 1020573 | --- | --- | --- | 1,13 | down |
| 5741205 | 7216132 | 1413399 | --- | --- | --- | 1,04 | up   |
| 5741307 | 7256191 | 1512861 | --- | --- | --- | 1,01 | down |
| 5741313 | 7248790 | 1494507 | --- | --- | --- | 1,03 | down |
| 5741352 | 7196029 | 1365618 | --- | --- | --- | 1,25 | up   |
| 5741421 | 7179785 | 1324488 | --- | --- | --- | 1,84 | down |
| 5741511 | 7373678 | 1805882 | --- | --- | --- | 1,14 | up   |
| 5741565 | 7364346 | 1780009 | --- | --- | --- | 1,12 | up   |
| 5741645 | 7295410 | 1609777 | --- | --- | --- | 1,01 | down |
| 5741703 | 7303616 | 1631386 | --- | --- | --- | 1,61 | down |
| 5741738 | 7086975 | 1095324 | --- | --- | --- | 1,07 | up   |
| 5741752 | 7236987 | 1465732 | --- | --- | --- | 2,01 | up   |
| 5741816 | 7132125 | 1206619 | --- | --- | --- | 1,14 | up   |
| 5741827 | 7333333 | 1703394 | --- | --- | --- | 1,23 | up   |
| 5741935 | 7097525 | 1121066 | --- | --- | --- | 1,40 | down |
| 5742045 | 7337902 | 1714546 | --- | --- | --- | 1,63 | up   |
| 5742138 | 7378878 | 1818320 | --- | --- | --- | 2,25 | down |
| 5742162 | 7236358 | 1464259 | --- | --- | --- | 1,08 | down |
| 5742250 | 7034756 | 973224  | --- | --- | --- | 1,08 | up   |
| 5742294 | 7068853 | 1053103 | --- | --- | --- | 1,05 | down |
| 5742377 | 7076236 | 1071201 | --- | --- | --- | 1,02 | down |
| 5742451 | 7377583 | 1815456 | --- | --- | --- | 1,03 | down |
| 5742628 | 7039265 | 983654  | --- | --- | --- | 1,06 | down |
| 5742849 | 7054147 | 1018976 | --- | --- | --- | 2,18 | up   |

|         |         |         |     |     |     |      |      |
|---------|---------|---------|-----|-----|-----|------|------|
| 5742907 | 7247229 | 1490537 | --- | --- | --- | 1,02 | down |
| 5743029 | 7086044 | 1092909 | --- | --- | --- | 2,87 | down |
| 5743042 | 7078666 | 1076508 | --- | --- | --- | 1,14 | down |
| 5743095 | 7162177 | 1280577 | --- | --- | --- | 1,06 | down |
| 5743149 | 7345465 | 1733859 | --- | --- | --- | 1,11 | down |
| 5743234 | 7356115 | 1760118 | --- | --- | --- | 1,07 | up   |
| 5743264 | 7141421 | 1229477 | --- | --- | --- | 1,08 | up   |
| 5743283 | 7240224 | 1474389 | --- | --- | --- | 1,22 | down |
| 5743333 | 7043535 | 994145  | --- | --- | --- | 1,01 | down |
| 5743374 | 7095021 | 1115127 | --- | --- | --- | 2,00 | down |
| 5743474 | 7215722 | 1412268 | --- | --- | --- | 1,77 | up   |
| 5743521 | 7238115 | 1468570 | --- | --- | --- | 1,00 | down |
| 5743782 | 7207069 | 1392029 | --- | --- | --- | 1,55 | down |
| 5743845 | 7207069 | 1392017 | --- | --- | --- | 1,09 | up   |
| 5743879 | 7349643 | 1744141 | --- | --- | --- | 1,47 | down |
| 5743914 | 7211343 | 1401975 | --- | --- | --- | 1,52 | up   |
| 5744235 | 7132125 | 1206616 | --- | --- | --- | 1,03 | up   |
| 5744248 | 7243647 | 1482463 | --- | --- | --- | 1,35 | down |
| 5744258 | 7060851 | 1033442 | --- | --- | --- | 1,23 | down |
| 5744292 | 7150348 | 1251418 | --- | --- | --- | 1,57 | down |
| 5744391 | 7069142 | 1053872 | --- | --- | --- | 1,26 | down |
| 5744567 | 7056333 | 1023683 | --- | --- | --- | 1,05 | up   |
| 5744592 | 7226241 | 1437812 | --- | --- | --- | 2,13 | down |
| 5744595 | 7380497 | 1821855 | --- | --- | --- | 1,10 | down |
| 5744610 | 7112225 | 1157544 | --- | --- | --- | 1,36 | up   |
| 5744683 | 7217679 | 1417317 | --- | --- | --- | 1,42 | up   |
| 5744763 | 7276650 | 1564149 | --- | --- | --- | 1,29 | up   |
| 5744778 | 7326612 | 1687185 | --- | --- | --- | 1,19 | down |
| 5744901 | 7108551 | 1148709 | --- | --- | --- | 1,78 | down |
| 5745254 | 7307721 | 1641988 | --- | --- | --- | 1,36 | up   |
| 5745296 | 7079600 | 1078628 | --- | --- | --- | 1,05 | up   |
| 5745343 | 7243653 | 1482524 | --- | --- | --- | 1,22 | down |
| 5745463 | 7260613 | 1524277 | --- | --- | --- | 1,38 | down |
| 5745474 | 7359453 | 1768450 | --- | --- | --- | 1,11 | down |
| 5745479 | 7369939 | 1795635 | --- | --- | --- | 1,07 | down |
| 5745522 | 7363576 | 1778194 | --- | --- | --- | 1,18 | up   |
| 5745557 | 7070836 | 1058333 | --- | --- | --- | 1,14 | down |
| 5745572 | 7052933 | 1016219 | --- | --- | --- | 1,05 | down |
| 5745686 | 7049399 | 1008393 | --- | --- | --- | 1,11 | up   |
| 5745744 | 7196029 | 1365639 | --- | --- | --- | 1,15 | down |
| 5745790 | 7301616 | 1625900 | --- | --- | --- | 1,12 | up   |
| 5745793 | 7196029 | 1365610 | --- | --- | --- | 2,72 | up   |
| 5746028 | 7161992 | 1280153 | --- | --- | --- | 1,29 | up   |
| 5746101 | 7336931 | 1711872 | --- | --- | --- | 1,37 | down |
| 5746158 | 7092549 | 1109138 | --- | --- | --- | 1,31 | up   |
| 5746226 | 7126658 | 1193169 | --- | --- | --- | 1,43 | up   |
| 5746247 | 7384509 | 1830738 | --- | --- | --- | 1,07 | down |
| 5746259 | 7052813 | 1015908 | --- | --- | --- | 1,39 | down |
| 5746443 | 7152974 | 1257658 | --- | --- | --- | 1,07 | down |
| 5746446 | 7120827 | 1179351 | --- | --- | --- | 1,33 | up   |
| 5746447 | 7060851 | 1033400 | --- | --- | --- | 1,04 | up   |
| 5746557 | 7297589 | 1615687 | --- | --- | --- | 1,01 | up   |
| 5746611 | 7321414 | 1675642 | --- | --- | --- | 1,84 | down |
| 5746700 | 7033337 | 969496  | --- | --- | --- | 1,21 | down |
| 5746833 | 7380497 | 1821845 | --- | --- | --- | 1,05 | down |
| 5747070 | 7072225 | 1061405 | --- | --- | --- | 1,03 | up   |

|         |         |         |     |     |     |      |      |
|---------|---------|---------|-----|-----|-----|------|------|
| 5747226 | 7368004 | 1789331 | --- | --- | --- | 1,25 | down |
| 5747238 | 7266706 | 1538749 | --- | --- | --- | 1,19 | down |
| 5747246 | 7318596 | 1668936 | --- | --- | --- | 1,22 | up   |
| 5747300 | 7257361 | 1516092 | --- | --- | --- | 1,07 | up   |
| 5747349 | 7127540 | 1195284 | --- | --- | --- | 1,10 | up   |
| 5747364 | 7251608 | 1501457 | --- | --- | --- | 1,22 | up   |
| 5747373 | 7294264 | 1606845 | --- | --- | --- | 1,02 | down |
| 5747458 | 7280743 | 1574558 | --- | --- | --- | 1,34 | down |
| 5747476 | 7264808 | 1534468 | --- | --- | --- | 1,02 | down |
| 5747510 | 7380497 | 1821862 | --- | --- | --- | 1,10 | up   |
| 5747608 | 7213908 | 1407662 | --- | --- | --- | 1,29 | down |
| 5747675 | 7345465 | 1733827 | --- | --- | --- | 1,58 | down |
| 5747710 | 7156044 | 1265715 | --- | --- | --- | 1,15 | down |
| 5747756 | 7070140 | 1056531 | --- | --- | --- | 1,07 | up   |
| 5747763 | 7229886 | 1447146 | --- | --- | --- | 1,15 | up   |
| 5747826 | 7293402 | 1604869 | --- | --- | --- | 1,24 | up   |
| 5747837 | 7120039 | 1177491 | --- | --- | --- | 1,31 | up   |
| 5747851 | 7096924 | 1119621 | --- | --- | --- | 1,89 | down |
| 5747853 | 7080731 | 1080981 | --- | --- | --- | 1,01 | up   |
| 5747939 | 7090278 | 1104135 | --- | --- | --- | 1,03 | up   |
| 5747973 | 7331297 | 1698802 | --- | --- | --- | 1,01 | down |
| 5748187 | 7330396 | 1696338 | --- | --- | --- | 1,91 | up   |
| 5748191 | 7229886 | 1447168 | --- | --- | --- | 1,26 | down |
| 5748220 | 7346066 | 1735309 | --- | --- | --- | 1,28 | up   |
| 5748295 | 7272110 | 1553073 | --- | --- | --- | 1,25 | up   |
| 5748340 | 7166439 | 1290098 | --- | --- | --- | 1,65 | up   |
| 5748435 | 7344190 | 1730603 | --- | --- | --- | 1,13 | down |
| 5748592 | 7115362 | 1165607 | --- | --- | --- | 1,19 | up   |
| 5748593 | 7210780 | 1400865 | --- | --- | --- | 1,01 | down |
| 5748612 | 7063873 | 1040642 | --- | --- | --- | 1,02 | down |
| 5748678 | 7323545 | 1679968 | --- | --- | --- | 1,51 | down |
| 5748695 | 7226241 | 1437814 | --- | --- | --- | 1,04 | up   |
| 5748831 | 7201217 | 1378761 | --- | --- | --- | 1,16 | up   |
| 5749011 | 7086966 | 1095267 | --- | --- | --- | 1,06 | down |
| 5749025 | 7035344 | 974297  | --- | --- | --- | 1,25 | up   |
| 5749215 | 7344530 | 1731580 | --- | --- | --- | 1,04 | down |
| 5749226 | 7025652 | 950289  | --- | --- | --- | 1,23 | down |
| 5749291 | 7111573 | 1156023 | --- | --- | --- | 1,41 | up   |
| 5749336 | 7246866 | 1489791 | --- | --- | --- | 1,24 | up   |
| 5749399 | 7237438 | 1466791 | --- | --- | --- | 1,47 | up   |
| 5749456 | 7065265 | 1044566 | --- | --- | --- | 1,08 | down |
| 5749505 | 7365183 | 1781916 | --- | --- | --- | 2,02 | down |
| 5749537 | 7071264 | 1059310 | --- | --- | --- | 1,05 | down |
| 5749575 | 7351951 | 1749829 | --- | --- | --- | 1,34 | up   |
| 5749624 | 7099030 | 1125335 | --- | --- | --- | 2,07 | down |
| 5749625 | 7186464 | 1341364 | --- | --- | --- | 1,27 | up   |
| 5749784 | 7305674 | 1636824 | --- | --- | --- | 1,01 | down |
| 5749800 | 7174149 | 1310489 | --- | --- | --- | 1,07 | down |
| 5749829 | 7284359 | 1583439 | --- | --- | --- | 1,27 | up   |
| 5749875 | 7117158 | 1170012 | --- | --- | --- | 1,13 | up   |
| 5749877 | 7233440 | 1456884 | --- | --- | --- | 3,44 | up   |
| 5749880 | 7206133 | 1389983 | --- | --- | --- | 1,12 | down |
| 5749960 | 7258520 | 1518853 | --- | --- | --- | 1,11 | down |
| 5750131 | 7377513 | 1815291 | --- | --- | --- | 1,08 | up   |
| 5750190 | 7060851 | 1033430 | --- | --- | --- | 1,04 | up   |
| 5750236 | 7215722 | 1412268 | --- | --- | --- | 1,86 | up   |

|         |         |         |     |     |     |      |      |
|---------|---------|---------|-----|-----|-----|------|------|
| 5750488 | 7165954 | 1288811 | --- | --- | --- | 1,06 | down |
| 5750617 | 7367994 | 1789238 | --- | --- | --- | 1,09 | up   |
| 5750675 | 7260613 | 1524278 | --- | --- | --- | 1,07 | up   |
| 5750683 | 7274780 | 1559243 | --- | --- | --- | 1,07 | up   |
| 5750698 | 7052385 | 1014786 | --- | --- | --- | 1,58 | up   |
| 5751007 | 7258345 | 1518537 | --- | --- | --- | 1,43 | down |
| 5751104 | 7333100 | 1702838 | --- | --- | --- | 1,03 | up   |
| 5751128 | 7316644 | 1664014 | --- | --- | --- | 1,50 | up   |
| 5751221 | 7364346 | 1780026 | --- | --- | --- | 2,07 | up   |
| 5751240 | 7267802 | 1541816 | --- | --- | --- | 1,07 | down |
| 5751243 | 7267953 | 1542232 | --- | --- | --- | 1,46 | down |
| 5751276 | 7265952 | 1536975 | --- | --- | --- | 1,81 | down |
| 5751353 | 7316644 | 1664030 | --- | --- | --- | 1,24 | down |
| 5751364 | 7279533 | 1571910 | --- | --- | --- | 2,58 | down |
| 5751403 | 7341002 | 1722534 | --- | --- | --- | 1,38 | up   |
| 5751416 | 7273251 | 1555949 | --- | --- | --- | 1,30 | up   |
| 5751418 | 7292154 | 1601672 | --- | --- | --- | 1,12 | down |
| 5751439 | 7339387 | 1718378 | --- | --- | --- | 1,17 | down |
| 5751459 | 7193056 | 1358255 | --- | --- | --- | 1,03 | down |
| 5751524 | 7315206 | 1660021 | --- | --- | --- | 1,00 | up   |
| 5751536 | 7267802 | 1541816 | --- | --- | --- | 1,14 | down |
| 5751794 | 7227313 | 1440692 | --- | --- | --- | 1,80 | up   |
| 5751876 | 7032444 | 966757  | --- | --- | --- | 1,19 | down |
| 5751916 | 7097680 | 1121744 | --- | --- | --- | 1,51 | up   |
| 5751972 | 7198210 | 1370958 | --- | --- | --- | 1,08 | up   |
| 5752036 | 7236991 | 1465818 | --- | --- | --- | 2,16 | down |
| 5752045 | 7056304 | 1023521 | --- | --- | --- | 1,21 | down |
| 5752052 | 7249737 | 1496747 | --- | --- | --- | 1,20 | up   |
| 5752095 | 7247954 | 1492397 | --- | --- | --- | 1,02 | up   |
| 5752177 | 7115362 | 1165598 | --- | --- | --- | 1,42 | down |
| 5752300 | 7196029 | 1365636 | --- | --- | --- | 1,13 | down |
| 5752365 | 7210780 | 1400869 | --- | --- | --- | 1,00 | up   |
| 5752422 | 7046605 | 1002433 | --- | --- | --- | 1,09 | up   |
| 5752503 | 7341646 | 1724194 | --- | --- | --- | 1,06 | up   |
| 5752519 | 7098366 | 1123618 | --- | --- | --- | 2,26 | up   |
| 5752575 | 7350993 | 1747523 | --- | --- | --- | 1,24 | down |
| 5752616 | 7266706 | 1538746 | --- | --- | --- | 1,33 | down |
| 5752625 | 7337260 | 1712808 | --- | --- | --- | 1,21 | up   |
| 5752790 | 7087805 | 1097502 | --- | --- | --- | 1,17 | up   |
| 5752791 | 7030454 | 961552  | --- | --- | --- | 1,21 | down |
| 5752793 | 7247229 | 1490536 | --- | --- | --- | 1,04 | down |
| 5752819 | 7235426 | 1461848 | --- | --- | --- | 1,23 | down |
| 5753012 | 7214605 | 1409365 | --- | --- | --- | 1,44 | down |
| 5753049 | 7070616 | 1057775 | --- | --- | --- | 1,05 | down |
| 5753101 | 7378997 | 1818657 | --- | --- | --- | 1,35 | up   |
| 5753149 | 7256191 | 1512859 | --- | --- | --- | 1,69 | up   |
| 5753237 | 7181193 | 1328292 | --- | --- | --- | 1,22 | up   |
| 5753249 | 7323545 | 1679987 | --- | --- | --- | 1,20 | up   |
| 5753252 | 7271008 | 1549970 | --- | --- | --- | 1,32 | down |
| 5753288 | 7092549 | 1109172 | --- | --- | --- | 1,04 | down |
| 5753313 | 7243130 | 1480907 | --- | --- | --- | 1,28 | down |
| 5753374 | 7329846 | 1694991 | --- | --- | --- | 1,20 | up   |
| 5753397 | 7243130 | 1480886 | --- | --- | --- | 1,04 | up   |
| 5753417 | 7065655 | 1045275 | --- | --- | --- | 1,48 | down |
| 5753635 | 7138047 | 1221238 | --- | --- | --- | 1,05 | up   |
| 5753639 | 7156114 | 1266055 | --- | --- | --- | 1,92 | up   |



|         |         |         |     |     |     |      |      |
|---------|---------|---------|-----|-----|-----|------|------|
| 5753674 | 7229856 | 1447079 | --- | --- | --- | 1,38 | up   |
| 5753708 | 7095021 | 1115124 | --- | --- | --- | 1,37 | up   |
| 5753811 | 7368613 | 1791624 | --- | --- | --- | 1,16 | down |
| 5753830 | 7323545 | 1679940 | --- | --- | --- | 1,20 | down |
| 5753852 | 7321414 | 1675637 | --- | --- | --- | 1,24 | up   |
| 5753957 | 7037764 | 980109  | --- | --- | --- | 1,23 | up   |
| 5754100 | 7068942 | 1053378 | --- | --- | --- | 1,05 | down |
| 5754263 | 7340057 | 1720325 | --- | --- | --- | 2,07 | up   |
| 5754322 | 7360486 | 1770965 | --- | --- | --- | 1,19 | down |
| 5754480 | 7193644 | 1359721 | --- | --- | --- | 1,16 | up   |
| 5754488 | 7331434 | 1699216 | --- | --- | --- | 1,13 | down |
| 5754508 | 7041609 | 989567  | --- | --- | --- | 1,01 | up   |
| 5754519 | 7268736 | 1544322 | --- | --- | --- | 1,02 | up   |
| 5754683 | 7031774 | 964754  | --- | --- | --- | 1,16 | down |
| 5754723 | 7195903 | 1365332 | --- | --- | --- | 1,03 | up   |
| 5754730 | 7230698 | 1449066 | --- | --- | --- | 1,74 | down |
| 5754788 | 7214605 | 1409398 | --- | --- | --- | 1,10 | up   |
| 5754831 | 7127540 | 1195300 | --- | --- | --- | 1,23 | up   |
| 5754848 | 7041584 | 989455  | --- | --- | --- | 1,53 | down |
| 5754888 | 7139026 | 1223503 | --- | --- | --- | 1,76 | down |
| 5754915 | 7360486 | 1771015 | --- | --- | --- | 1,01 | up   |
| 5754984 | 7294866 | 1608401 | --- | --- | --- | 1,28 | down |
| 5755082 | 7340990 | 1722512 | --- | --- | --- | 1,04 | down |
| 5755099 | 7249503 | 1496184 | --- | --- | --- | 1,42 | up   |
| 5755142 | 7083031 | 1086285 | --- | --- | --- | 1,35 | up   |
| 5755230 | 7107321 | 1145322 | --- | --- | --- | 1,04 | down |
| 5755292 | 7142081 | 1230985 | --- | --- | --- | 1,01 | up   |
| 5755361 | 7290288 | 1597343 | --- | --- | --- | 1,93 | up   |
| 5755369 | 7096859 | 1119308 | --- | --- | --- | 1,18 | down |
| 5755393 | 7174149 | 1310498 | --- | --- | --- | 1,24 | down |
| 5755576 | 7083030 | 1086272 | --- | --- | --- | 1,42 | up   |
| 5755639 | 7315206 | 1660037 | --- | --- | --- | 1,75 | down |
| 5755661 | 7258784 | 1519671 | --- | --- | --- | 1,45 | down |
| 5755764 | 7238202 | 1468946 | --- | --- | --- | 2,55 | down |
| 5755818 | 7253272 | 1505569 | --- | --- | --- | 1,68 | up   |
| 5755838 | 7042382 | 991296  | --- | --- | --- | 1,39 | up   |
| 5755862 | 7267380 | 1540445 | --- | --- | --- | 1,04 | up   |
| 5755888 | 7384365 | 1830270 | --- | --- | --- | 2,02 | down |
| 5755918 | 7374842 | 1808996 | --- | --- | --- | 1,75 | up   |
| 5755933 | 7067670 | 1050320 | --- | --- | --- | 1,48 | up   |
| 5756002 | 7316644 | 1664016 | --- | --- | --- | 2,19 | down |
| 5756128 | 7180861 | 1327224 | --- | --- | --- | 1,07 | up   |
| 5756225 | 7063873 | 1040641 | --- | --- | --- | 1,26 | down |
| 5756256 | 7190524 | 1351177 | --- | --- | --- | 1,19 | up   |
| 5756298 | 7252382 | 1503515 | --- | --- | --- | 2,30 | up   |
| 5756302 | 7274892 | 1559576 | --- | --- | --- | 1,36 | up   |
| 5756360 | 7069253 | 1054175 | --- | --- | --- | 2,05 | down |
| 5756371 | 7025652 | 950300  | --- | --- | --- | 1,14 | up   |
| 5756489 | 7281077 | 1575558 | --- | --- | --- | 1,05 | down |
| 5756594 | 7339379 | 1718334 | --- | --- | --- | 1,20 | up   |
| 5756805 | 7181105 | 1327967 | --- | --- | --- | 1,36 | down |
| 5756979 | 7083030 | 1086255 | --- | --- | --- | 1,10 | down |
| 5756990 | 7186464 | 1341385 | --- | --- | --- | 1,60 | down |
| 5757124 | 7107926 | 1146838 | --- | --- | --- | 1,33 | down |
| 5757131 | 7297589 | 1615642 | --- | --- | --- | 1,06 | up   |
| 5757338 | 7303616 | 1631339 | --- | --- | --- | 1,00 | up   |

|         |         |         |     |     |     |      |      |
|---------|---------|---------|-----|-----|-----|------|------|
| 5757372 | 7243130 | 1480841 | --- | --- | --- | 1,07 | down |
| 5757527 | 7225304 | 1435319 | --- | --- | --- | 1,56 | up   |
| 5757537 | 7146000 | 1240655 | --- | --- | --- | 3,01 | down |
| 5757571 | 7056304 | 1023556 | --- | --- | --- | 1,05 | down |
| 5757673 | 7052813 | 1015892 | --- | --- | --- | 1,23 | down |
| 5757738 | 7231775 | 1452125 | --- | --- | --- | 1,45 | down |
| 5757752 | 7038316 | 981456  | --- | --- | --- | 1,17 | down |
| 5757935 | 7361420 | 1773038 | --- | --- | --- | 2,18 | down |
| 5758007 | 7170845 | 1301879 | --- | --- | --- | 1,25 | down |
| 5758056 | 7240569 | 1475521 | --- | --- | --- | 1,21 | down |
| 5758075 | 7127540 | 1195301 | --- | --- | --- | 1,35 | up   |
| 5758131 | 7279073 | 1570711 | --- | --- | --- | 1,31 | down |
| 5758189 | 7361420 | 1773054 | --- | --- | --- | 1,11 | up   |
| 5758290 | 7132024 | 1206344 | --- | --- | --- | 1,52 | up   |
| 5758360 | 7371446 | 1800085 | --- | --- | --- | 1,72 | down |
| 5758543 | 7198325 | 1371350 | --- | --- | --- | 1,69 | down |
| 5758623 | 7289069 | 1594419 | --- | --- | --- | 1,34 | down |
| 5758670 | 7213908 | 1407757 | --- | --- | --- | 1,66 | up   |
| 5758812 | 7101258 | 1130566 | --- | --- | --- | 1,15 | down |
| 5758814 | 7345882 | 1734812 | --- | --- | --- | 1,60 | down |
| 5758855 | 7360486 | 1771025 | --- | --- | --- | 2,05 | down |
| 5758945 | 7279533 | 1571917 | --- | --- | --- | 1,02 | up   |
| 5758961 | 7378997 | 1818620 | --- | --- | --- | 1,54 | down |
| 5759001 | 7275003 | 1559937 | --- | --- | --- | 2,00 | down |
| 5759043 | 7156372 | 1266709 | --- | --- | --- | 1,15 | up   |
| 5759053 | 7303616 | 1631376 | --- | --- | --- | 1,06 | down |
| 5759081 | 7069239 | 1054092 | --- | --- | --- | 1,11 | down |
| 5759209 | 7203872 | 1384750 | --- | --- | --- | 1,36 | down |
| 5759229 | 7084993 | 1090678 | --- | --- | --- | 1,18 | up   |
| 5759336 | 7112225 | 1157543 | --- | --- | --- | 1,30 | down |
| 5759446 | 7180861 | 1327186 | --- | --- | --- | 1,15 | up   |
| 5759455 | 7068853 | 1053111 | --- | --- | --- | 1,15 | up   |
| 5759550 | 7053874 | 1018311 | --- | --- | --- | 1,00 | down |
| 5759574 | 7373678 | 1805857 | --- | --- | --- | 1,17 | down |
| 5759589 | 7233440 | 1456839 | --- | --- | --- | 1,09 | up   |
| 5759682 | 7039223 | 983549  | --- | --- | --- | 1,31 | down |
| 5759809 | 7050557 | 1010797 | --- | --- | --- | 1,04 | down |
| 5759960 | 7181016 | 1327783 | --- | --- | --- | 1,15 | down |
| 5760132 | 7049118 | 1007791 | --- | --- | --- | 1,47 | down |
| 5760157 | 7373678 | 1805881 | --- | --- | --- | 1,18 | up   |
| 5760159 | 7276231 | 1563101 | --- | --- | --- | 1,08 | down |
| 5760178 | 7069724 | 1055338 | --- | --- | --- | 1,05 | up   |
| 5760183 | 7261768 | 1527165 | --- | --- | --- | 1,42 | up   |
| 5760244 | 7138255 | 1221710 | --- | --- | --- | 1,22 | up   |
| 5760299 | 7075424 | 1069298 | --- | --- | --- | 1,11 | down |
| 5760450 | 7181193 | 1328302 | --- | --- | --- | 2,03 | up   |
| 5760597 | 7361223 | 1772613 | --- | --- | --- | 1,19 | down |
| 5760769 | 7147416 | 1244423 | --- | --- | --- | 1,13 | down |
| 5760833 | 7303616 | 1631375 | --- | --- | --- | 1,28 | up   |
| 5760956 | 7210780 | 1400875 | --- | --- | --- | 1,03 | down |
| 5761036 | 7303616 | 1631313 | --- | --- | --- | 1,15 | up   |
| 5761074 | 7069830 | 1055637 | --- | --- | --- | 1,09 | down |
| 5761318 | 7049399 | 1008416 | --- | --- | --- | 1,01 | down |
| 5761471 | 7371446 | 1800081 | --- | --- | --- | 1,05 | up   |
| 5761539 | 7226241 | 1437768 | --- | --- | --- | 1,19 | up   |
| 5761561 | 7059765 | 1030957 | --- | --- | --- | 1,24 | up   |

|         |         |         |     |     |     |      |      |
|---------|---------|---------|-----|-----|-----|------|------|
| 5761566 | 7031774 | 964688  | --- | --- | --- | 1,92 | up   |
| 5761737 | 7190534 | 1351229 | --- | --- | --- | 1,28 | down |
| 5761836 | 7356333 | 1760489 | --- | --- | --- | 1,05 | up   |
| 5761842 | 7341002 | 1722557 | --- | --- | --- | 1,43 | up   |
| 5761851 | 7169732 | 1298758 | --- | --- | --- | 1,02 | down |
| 5761891 | 7384073 | 1829458 | --- | --- | --- | 1,04 | up   |
| 5761899 | 7315206 | 1660018 | --- | --- | --- | 1,35 | up   |
| 5762084 | 7287337 | 1589976 | --- | --- | --- | 1,96 | down |
| 5762155 | 7248790 | 1494495 | --- | --- | --- | 1,14 | down |
| 5762260 | 7213945 | 1407850 | --- | --- | --- | 1,63 | down |
| 5762335 | 7333462 | 1703647 | --- | --- | --- | 1,33 | up   |
| 5762396 | 7067670 | 1050304 | --- | --- | --- | 1,45 | up   |
| 5762538 | 7198210 | 1371001 | --- | --- | --- | 1,41 | down |
| 5762548 | 7180620 | 1326384 | --- | --- | --- | 1,43 | up   |
| 5762578 | 7236358 | 1464219 | --- | --- | --- | 1,09 | up   |
| 5762608 | 7274593 | 1558805 | --- | --- | --- | 7,03 | down |
| 5762618 | 7171047 | 1302369 | --- | --- | --- | 1,38 | down |
| 5762660 | 7344702 | 1732140 | --- | --- | --- | 1,23 | down |
| 5762714 | 7200545 | 1376901 | --- | --- | --- | 1,07 | down |
| 5762797 | 7267380 | 1540416 | --- | --- | --- | 2,45 | up   |
| 5762873 | 7341397 | 1723645 | --- | --- | --- | 1,01 | down |
| 5762885 | 7364948 | 1781209 | --- | --- | --- | 1,42 | down |
| 5762968 | 7098189 | 1123160 | --- | --- | --- | 1,17 | down |
| 5762988 | 7333462 | 1703641 | --- | --- | --- | 1,55 | up   |
| 5763046 | 7064224 | 1041800 | --- | --- | --- | 1,28 | down |
| 5763069 | 7203872 | 1384752 | --- | --- | --- | 1,21 | down |
| 5763125 | 7196065 | 1365726 | --- | --- | --- | 2,13 | up   |
| 5763127 | 7025652 | 950294  | --- | --- | --- | 1,55 | up   |
| 5763337 | 7059020 | 1029348 | --- | --- | --- | 1,26 | up   |
| 5763405 | 7258105 | 1517984 | --- | --- | --- | 1,53 | down |
| 5763520 | 7264797 | 1534442 | --- | --- | --- | 1,38 | up   |
| 5763614 | 7073854 | 1065623 | --- | --- | --- | 1,93 | down |
| 5763766 | 7273251 | 1555941 | --- | --- | --- | 1,28 | down |
| 5763992 | 7129841 | 1200829 | --- | --- | --- | 1,25 | down |
| 5764041 | 7209927 | 1398941 | --- | --- | --- | 1,17 | up   |
| 5764082 | 7358859 | 1767018 | --- | --- | --- | 1,12 | up   |
| 5764116 | 7196029 | 1365617 | --- | --- | --- | 1,22 | up   |
| 5764151 | 7340304 | 1720843 | --- | --- | --- | 1,51 | down |
| 5764154 | 7052385 | 1014794 | --- | --- | --- | 1,15 | up   |
| 5764177 | 7157341 | 1269169 | --- | --- | --- | 1,22 | down |
| 5764239 | 7303616 | 1631345 | --- | --- | --- | 1,00 | up   |
| 5764242 | 7369939 | 1795613 | --- | --- | --- | 1,30 | down |
| 5764347 | 7143455 | 1234739 | --- | --- | --- | 1,11 | down |
| 5764368 | 7229886 | 1447159 | --- | --- | --- | 1,35 | down |
| 5764512 | 7326612 | 1687188 | --- | --- | --- | 1,12 | up   |
| 5764585 | 7277783 | 1567420 | --- | --- | --- | 1,75 | up   |
| 5764591 | 7330623 | 1696950 | --- | --- | --- | 1,42 | up   |
| 5764647 | 7183182 | 1333571 | --- | --- | --- | 1,67 | down |
| 5764652 | 7302018 | 1626963 | --- | --- | --- | 1,02 | up   |
| 5764774 | 7249503 | 1496183 | --- | --- | --- | 1,07 | up   |
| 5764857 | 7049399 | 1008400 | --- | --- | --- | 1,09 | down |
| 5764920 | 7253453 | 1506152 | --- | --- | --- | 1,04 | up   |
| 5764961 | 7059584 | 1030556 | --- | --- | --- | 1,07 | down |
| 5765014 | 7099573 | 1126729 | --- | --- | --- | 1,29 | up   |
| 5765021 | 7068853 | 1053121 | --- | --- | --- | 1,00 | up   |
| 5765075 | 7214363 | 1408973 | --- | --- | --- | 1,17 | up   |

|         |         |         |     |     |     |      |      |
|---------|---------|---------|-----|-----|-----|------|------|
| 5765080 | 7112562 | 1158600 | --- | --- | --- | 2,23 | down |
| 5765141 | 7373906 | 1806353 | --- | --- | --- | 1,33 | up   |
| 5765158 | 7289382 | 1595213 | --- | --- | --- | 1,03 | up   |
| 5765180 | 7360325 | 1770492 | --- | --- | --- | 1,01 | down |
| 5765204 | 7243363 | 1481627 | --- | --- | --- | 1,09 | down |
| 5765250 | 7067670 | 1050302 | --- | --- | --- | 1,28 | up   |
| 5765308 | 7112225 | 1157580 | --- | --- | --- | 1,31 | up   |
| 5765338 | 7243130 | 1480811 | --- | --- | --- | 1,15 | up   |
| 5765352 | 7323545 | 1679962 | --- | --- | --- | 1,68 | up   |
| 5765444 | 7301879 | 1626624 | --- | --- | --- | 1,63 | down |
| 5765464 | 7373633 | 1805698 | --- | --- | --- | 1,03 | down |
| 5765474 | 7330396 | 1696354 | --- | --- | --- | 1,13 | up   |
| 5765510 | 7072765 | 1062742 | --- | --- | --- | 1,17 | up   |
| 5765512 | 7060851 | 1033407 | --- | --- | --- | 1,05 | down |
| 5765748 | 7146000 | 1240656 | --- | --- | --- | 1,39 | up   |
| 5765786 | 7181193 | 1328290 | --- | --- | --- | 1,14 | up   |
| 5765872 | 7286807 | 1588792 | --- | --- | --- | 1,05 | up   |
| 5765888 | 7108300 | 1147915 | --- | --- | --- | 1,16 | up   |
| 5765953 | 7369939 | 1795614 | --- | --- | --- | 1,50 | down |
| 5766014 | 7265259 | 1535447 | --- | --- | --- | 1,01 | up   |
| 5766332 | 7279568 | 1572013 | --- | --- | --- | 1,36 | down |
| 5766388 | 7036870 | 977870  | --- | --- | --- | 1,05 | up   |
| 5766507 | 7131550 | 1205562 | --- | --- | --- | 1,08 | up   |
| 5766515 | 7214605 | 1409404 | --- | --- | --- | 2,02 | down |
| 5766563 | 7334331 | 1705687 | --- | --- | --- | 1,09 | down |
| 5766583 | 7052331 | 1014598 | --- | --- | --- | 1,05 | down |
| 5766682 | 7214363 | 1408956 | --- | --- | --- | 1,21 | up   |
| 5766737 | 7071264 | 1059363 | --- | --- | --- | 2,29 | up   |
| 5766850 | 7038969 | 982979  | --- | --- | --- | 1,25 | down |
| 5766887 | 7367994 | 1789256 | --- | --- | --- | 2,01 | up   |
| 5767093 | 7349817 | 1744588 | --- | --- | --- | 1,59 | down |
| 5767232 | 7367971 | 1789127 | --- | --- | --- | 1,05 | up   |
| 5767342 | 7297274 | 1614661 | --- | --- | --- | 1,02 | down |
| 5767408 | 7339110 | 1717614 | --- | --- | --- | 1,31 | up   |
| 5767520 | 7258520 | 1518881 | --- | --- | --- | 1,10 | up   |
| 5767526 | 7243363 | 1481626 | --- | --- | --- | 1,14 | up   |
| 5767595 | 7249503 | 1496223 | --- | --- | --- | 1,04 | down |
| 5767653 | 7153589 | 1259083 | --- | --- | --- | 1,11 | up   |
| 5767730 | 7061003 | 1033921 | --- | --- | --- | 1,00 | up   |
| 5767759 | 7339379 | 1718326 | --- | --- | --- | 1,37 | up   |
| 5767802 | 7350489 | 1746126 | --- | --- | --- | 1,26 | down |
| 5767812 | 7350993 | 1747551 | --- | --- | --- | 1,67 | down |
| 5767813 | 7349817 | 1744597 | --- | --- | --- | 1,18 | down |
| 5767821 | 7286807 | 1588833 | --- | --- | --- | 1,65 | down |
| 5767894 | 7287222 | 1589746 | --- | --- | --- | 1,19 | up   |
| 5767936 | 7181193 | 1328289 | --- | --- | --- | 1,19 | down |
| 5767949 | 7225553 | 1435985 | --- | --- | --- | 1,18 | down |
| 5767966 | 7068073 | 1051176 | --- | --- | --- | 1,40 | up   |
| 5767985 | 7299512 | 1620557 | --- | --- | --- | 1,05 | down |
| 5768044 | 7097485 | 1120935 | --- | --- | --- | 1,35 | down |
| 5768056 | 7181590 | 1329428 | --- | --- | --- | 1,09 | down |
| 5768145 | 7384509 | 1830736 | --- | --- | --- | 1,04 | down |
| 5768214 | 7242451 | 1479338 | --- | --- | --- | 1,48 | up   |
| 5768267 | 7032204 | 966120  | --- | --- | --- | 1,29 | down |
| 5768360 | 7083030 | 1086267 | --- | --- | --- | 1,17 | down |
| 5768476 | 7198210 | 1370970 | --- | --- | --- | 1,09 | up   |

|         |         |         |     |     |     |      |      |
|---------|---------|---------|-----|-----|-----|------|------|
| 5768479 | 7297589 | 1615603 | --- | --- | --- | 1,22 | up   |
| 5768704 | 7287337 | 1589994 | --- | --- | --- | 1,22 | down |
| 5768731 | 7156052 | 1265780 | --- | --- | --- | 1,13 | up   |
| 5768745 | 7230886 | 1449526 | --- | --- | --- | 1,11 | up   |
| 5768798 | 7101400 | 1130920 | --- | --- | --- | 1,45 | down |
| 5768847 | 7239752 | 1473196 | --- | --- | --- | 1,13 | up   |
| 5768923 | 7246866 | 1489800 | --- | --- | --- | 1,42 | up   |
| 5768927 | 7202550 | 1381609 | --- | --- | --- | 2,32 | down |
| 5769128 | 7083030 | 1086261 | --- | --- | --- | 1,29 | up   |
| 5769287 | 7180861 | 1327216 | --- | --- | --- | 1,23 | up   |
| 5769321 | 7093806 | 1112161 | --- | --- | --- | 2,17 | down |
| 5769330 | 7232340 | 1453519 | --- | --- | --- | 1,26 | down |
| 5769757 | 7233440 | 1456827 | --- | --- | --- | 1,38 | down |
| 5769852 | 7320234 | 1673015 | --- | --- | --- | 1,36 | down |
| 5769945 | 7029770 | 960158  | --- | --- | --- | 1,27 | up   |
| 5769998 | 7117158 | 1170020 | --- | --- | --- | 1,37 | down |
| 5770025 | 7350993 | 1747532 | --- | --- | --- | 1,10 | down |
| 5770049 | 7384365 | 1830275 | --- | --- | --- | 1,13 | up   |
| 5770050 | 7356115 | 1760134 | --- | --- | --- | 1,33 | down |
| 5770082 | 7240569 | 1475464 | --- | --- | --- | 1,10 | up   |
| 5770352 | 7274892 | 1559525 | --- | --- | --- | 1,05 | up   |
| 5770427 | 7360486 | 1771015 | --- | --- | --- | 1,02 | up   |
| 5770463 | 7069253 | 1054151 | --- | --- | --- | 1,49 | up   |
| 5770491 | 7075445 | 1069341 | --- | --- | --- | 1,15 | up   |
| 5770743 | 7102369 | 1133418 | --- | --- | --- | 1,12 | down |
| 5770884 | 7168858 | 1296833 | --- | --- | --- | 1,17 | up   |
| 5770951 | 7112225 | 1157527 | --- | --- | --- | 1,00 | up   |
| 5770957 | 7032083 | 965682  | --- | --- | --- | 1,24 | up   |
| 5771000 | 7039265 | 983658  | --- | --- | --- | 1,02 | up   |
| 5771019 | 7140946 | 1228325 | --- | --- | --- | 1,15 | up   |
| 5771116 | 7218728 | 1419919 | --- | --- | --- | 1,31 | up   |
| 5771213 | 7229886 | 1447164 | --- | --- | --- | 1,09 | up   |
| 5771253 | 7210600 | 1400520 | --- | --- | --- | 1,07 | up   |
| 5771320 | 7280743 | 1574523 | --- | --- | --- | 1,02 | up   |
| 5771386 | 7156052 | 1265772 | --- | --- | --- | 1,32 | down |
| 5771574 | 7181193 | 1328304 | --- | --- | --- | 1,01 | down |
| 5771593 | 7344406 | 1731192 | --- | --- | --- | 1,04 | up   |
| 5771609 | 7338807 | 1716798 | --- | --- | --- | 1,11 | down |
| 5771633 | 7034293 | 971810  | --- | --- | --- | 2,57 | up   |
| 5771676 | 7293454 | 1604956 | --- | --- | --- | 1,58 | up   |
| 5771684 | 7102976 | 1135062 | --- | --- | --- | 2,63 | up   |
| 5771700 | 7356115 | 1760133 | --- | --- | --- | 1,39 | up   |
| 5771724 | 7302098 | 1627162 | --- | --- | --- | 1,28 | down |
| 5771803 | 7243647 | 1482425 | --- | --- | --- | 1,02 | up   |
| 5771806 | 7108551 | 1148709 | --- | --- | --- | 1,24 | down |
| 5771914 | 7311367 | 1650728 | --- | --- | --- | 1,01 | down |
| 5772056 | 7199476 | 1374563 | --- | --- | --- | 1,01 | up   |
| 5772062 | 7340304 | 1720867 | --- | --- | --- | 2,46 | down |
| 5772103 | 7213908 | 1407712 | --- | --- | --- | 1,12 | down |
| 5772125 | 7050780 | 1011369 | --- | --- | --- | 1,18 | up   |
| 5772150 | 7372840 | 1803780 | --- | --- | --- | 1,06 | up   |
| 5772246 | 7238202 | 1468939 | --- | --- | --- | 1,38 | up   |
| 5772311 | 7198644 | 1372268 | --- | --- | --- | 1,33 | up   |
| 5772360 | 7218728 | 1419929 | --- | --- | --- | 1,07 | up   |
| 5772434 | 7040260 | 986041  | --- | --- | --- | 1,17 | down |
| 5772436 | 7321414 | 1675643 | --- | --- | --- | 2,11 | down |

|         |         |         |     |     |     |      |      |
|---------|---------|---------|-----|-----|-----|------|------|
| 5772526 | 7217747 | 1417506 | --- | --- | --- | 1,29 | up   |
| 5772629 | 7274892 | 1559525 | --- | --- | --- | 1,18 | down |
| 5772684 | 7069464 | 1054670 | --- | --- | --- | 1,10 | down |
| 5772708 | 7065266 | 1044588 | --- | --- | --- | 1,29 | up   |
| 5772733 | 7240224 | 1474390 | --- | --- | --- | 1,30 | up   |
| 5772782 | 7080731 | 1080971 | --- | --- | --- | 1,52 | up   |
| 5772829 | 7086966 | 1095278 | --- | --- | --- | 1,32 | down |
| 5772881 | 7097680 | 1121748 | --- | --- | --- | 1,41 | down |
| 5772932 | 7040260 | 986093  | --- | --- | --- | 1,16 | down |
| 5772969 | 7112672 | 1158978 | --- | --- | --- | 1,97 | up   |
| 5773163 | 7064468 | 1042378 | --- | --- | --- | 2,28 | up   |
| 5773288 | 7236254 | 1464052 | --- | --- | --- | 1,66 | down |
| 5773313 | 7331297 | 1698820 | --- | --- | --- | 1,37 | down |
| 5773338 | 7288095 | 1592061 | --- | --- | --- | 1,90 | down |
| 5773466 | 7331434 | 1699204 | --- | --- | --- | 1,82 | up   |
| 5773585 | 7337224 | 1712607 | --- | --- | --- | 1,19 | up   |
| 5773797 | 7188829 | 1346669 | --- | --- | --- | 1,01 | up   |
| 5773811 | 7196029 | 1365601 | --- | --- | --- | 1,95 | up   |
| 5773812 | 7199476 | 1374534 | --- | --- | --- | 1,08 | up   |
| 5773983 | 7343122 | 1727745 | --- | --- | --- | 1,38 | up   |
| 5774024 | 7030224 | 961135  | --- | --- | --- | 1,01 | down |
| 5774163 | 7091954 | 1107721 | --- | --- | --- | 1,06 | up   |
| 5774164 | 7370475 | 1797134 | --- | --- | --- | 1,37 | down |
| 5774221 | 7147809 | 1245453 | --- | --- | --- | 1,20 | up   |
| 5774297 | 7198210 | 1370968 | --- | --- | --- | 1,13 | up   |
| 5774363 | 7043535 | 994096  | --- | --- | --- | 1,03 | down |
| 5774369 | 7056333 | 1023713 | --- | --- | --- | 1,04 | down |
| 5774401 | 7096924 | 1119615 | --- | --- | --- | 1,75 | up   |
| 5774594 | 7265259 | 1535438 | --- | --- | --- | 1,14 | down |
| 5774740 | 7244602 | 1484757 | --- | --- | --- | 1,01 | up   |
| 5774915 | 7285897 | 1586641 | --- | --- | --- | 1,15 | up   |
| 5775034 | 7370977 | 1798760 | --- | --- | --- | 2,10 | down |
| 5775082 | 7115880 | 1166839 | --- | --- | --- | 1,30 | down |
| 5775351 | 7350237 | 1745474 | --- | --- | --- | 1,29 | down |
| 5775352 | 7360486 | 1770972 | --- | --- | --- | 1,32 | up   |
| 5775375 | 7052813 | 1015913 | --- | --- | --- | 1,35 | up   |
| 5775456 | 7384365 | 1830268 | --- | --- | --- | 1,05 | down |
| 5775462 | 7076236 | 1071180 | --- | --- | --- | 1,06 | down |
| 5775463 | 7052933 | 1016215 | --- | --- | --- | 1,06 | down |
| 5775538 | 7161300 | 1278554 | --- | --- | --- | 1,01 | down |
| 5775547 | 7132024 | 1206337 | --- | --- | --- | 1,15 | down |
| 5775593 | 7240569 | 1475472 | --- | --- | --- | 1,09 | up   |
| 5775778 | 7340304 | 1720865 | --- | --- | --- | 1,70 | down |
| 5775805 | 7360325 | 1770507 | --- | --- | --- | 1,02 | down |
| 5775852 | 7075424 | 1069277 | --- | --- | --- | 1,15 | down |
| 5775898 | 7064905 | 1043436 | --- | --- | --- | 1,34 | up   |
| 5776042 | 7119930 | 1177230 | --- | --- | --- | 1,42 | up   |
| 5776130 | 7239752 | 1473168 | --- | --- | --- | 1,14 | up   |
| 5776140 | 7178060 | 1320163 | --- | --- | --- | 1,07 | down |
| 5776168 | 7311218 | 1650350 | --- | --- | --- | 1,13 | up   |
| 5776203 | 7225304 | 1435313 | --- | --- | --- | 1,27 | down |
| 5776265 | 7059375 | 1030062 | --- | --- | --- | 1,33 | up   |
| 5776353 | 7350993 | 1747553 | --- | --- | --- | 1,26 | up   |
| 5776514 | 7277783 | 1567444 | --- | --- | --- | 1,75 | up   |
| 5776567 | 7038153 | 981149  | --- | --- | --- | 1,03 | up   |
| 5776633 | 7239752 | 1473169 | --- | --- | --- | 1,18 | down |

|         |         |         |     |     |     |      |      |
|---------|---------|---------|-----|-----|-----|------|------|
| 5776715 | 7321029 | 1674831 | --- | --- | --- | 1,48 | up   |
| 5776810 | 7039223 | 983577  | --- | --- | --- | 1,29 | up   |
| 5776850 | 7049399 | 1008348 | --- | --- | --- | 1,27 | down |
| 5776905 | 7341253 | 1723265 | --- | --- | --- | 1,62 | up   |
| 5777008 | 7303616 | 1631362 | --- | --- | --- | 1,05 | up   |
| 5777034 | 7269637 | 1546244 | --- | --- | --- | 2,70 | down |
| 5777185 | 7280743 | 1574502 | --- | --- | --- | 1,25 | down |
| 5777268 | 7225213 | 1435123 | --- | --- | --- | 1,15 | up   |
| 5777406 | 7108300 | 1147916 | --- | --- | --- | 1,10 | up   |
| 5777496 | 7025652 | 950299  | --- | --- | --- | 1,07 | down |
| 5777557 | 7217747 | 1417492 | --- | --- | --- | 1,41 | down |
| 5777830 | 7264797 | 1534437 | --- | --- | --- | 1,01 | up   |
| 5778104 | 7243647 | 1482487 | --- | --- | --- | 1,17 | up   |
| 5778115 | 7182056 | 1330576 | --- | --- | --- | 1,21 | up   |
| 5778182 | 7132125 | 1206617 | --- | --- | --- | 1,19 | up   |
| 5778242 | 7068942 | 1053384 | --- | --- | --- | 1,02 | up   |
| 5778383 | 7373906 | 1806364 | --- | --- | --- | 1,36 | down |
| 5778485 | 7181086 | 1327924 | --- | --- | --- | 1,39 | down |
| 5778523 | 7271128 | 1550319 | --- | --- | --- | 1,12 | up   |
| 5778593 | 7143904 | 1235800 | --- | --- | --- | 1,13 | up   |
| 5778622 | 7253088 | 1505123 | --- | --- | --- | 1,08 | up   |
| 5778649 | 7181105 | 1327967 | --- | --- | --- | 1,33 | down |
| 5778670 | 7168309 | 1295348 | --- | --- | --- | 1,53 | down |
| 5778712 | 7182713 | 1332540 | --- | --- | --- | 1,19 | down |
| 5778755 | 7333333 | 1703398 | --- | --- | --- | 1,39 | up   |
| 5778944 | 7321029 | 1674808 | --- | --- | --- | 1,21 | down |
| 5778950 | 7056333 | 1023701 | --- | --- | --- | 1,39 | down |
| 5778954 | 7257976 | 1517706 | --- | --- | --- | 1,58 | up   |
| 5779135 | 7351953 | 1749858 | --- | --- | --- | 1,55 | down |
| 5779160 | 7308679 | 1644252 | --- | --- | --- | 1,51 | up   |
| 5779170 | 7091954 | 1107726 | --- | --- | --- | 1,03 | down |
| 5779346 | 7340258 | 1720734 | --- | --- | --- | 1,14 | up   |
| 5779367 | 7068853 | 1053122 | --- | --- | --- | 1,01 | up   |
| 5779560 | 7105814 | 1141774 | --- | --- | --- | 1,10 | down |
| 5779585 | 7363674 | 1778440 | --- | --- | --- | 1,03 | down |
| 5779781 | 7249503 | 1496232 | --- | --- | --- | 1,22 | up   |
| 5779833 | 7156170 | 1266229 | --- | --- | --- | 1,12 | down |
| 5779888 | 7367969 | 1789104 | --- | --- | --- | 1,63 | down |
| 5779967 | 7139708 | 1225056 | --- | --- | --- | 1,02 | up   |
| 5779990 | 7063873 | 1040647 | --- | --- | --- | 1,08 | up   |
| 5780009 | 7093806 | 1112166 | --- | --- | --- | 3,25 | down |
| 5780020 | 7339387 | 1718394 | --- | --- | --- | 1,21 | down |
| 5780116 | 7240665 | 1475844 | --- | --- | --- | 1,05 | up   |
| 5780196 | 7217747 | 1417490 | --- | --- | --- | 1,44 | up   |
| 5780232 | 7232029 | 1452789 | --- | --- | --- | 1,41 | up   |
| 5780238 | 7341397 | 1723644 | --- | --- | --- | 1,08 | up   |
| 5780304 | 7298920 | 1618823 | --- | --- | --- | 1,35 | down |
| 5780359 | 7370475 | 1797135 | --- | --- | --- | 1,11 | down |
| 5780462 | 7145669 | 1240010 | --- | --- | --- | 1,00 | up   |
| 5780507 | 7374790 | 1808777 | --- | --- | --- | 1,20 | down |
| 5780569 | 7192902 | 1357765 | --- | --- | --- | 1,34 | down |
| 5780606 | 7308679 | 1644239 | --- | --- | --- | 1,32 | down |
| 5780614 | 7239939 | 1473793 | --- | --- | --- | 1,16 | up   |
| 5780635 | 7236395 | 1464318 | --- | --- | --- | 1,14 | down |
| 5780641 | 7217679 | 1417313 | --- | --- | --- | 1,01 | up   |
| 5780758 | 7060851 | 1033428 | --- | --- | --- | 1,12 | up   |

|         |         |         |     |     |     |      |      |
|---------|---------|---------|-----|-----|-----|------|------|
| 5780765 | 7238845 | 1470743 | --- | --- | --- | 1,01 | up   |
| 5780776 | 7273223 | 1555876 | --- | --- | --- | 1,41 | up   |
| 5780975 | 7264085 | 1532719 | --- | --- | --- | 2,94 | down |
| 5781048 | 7363576 | 1778176 | --- | --- | --- | 1,04 | down |
| 5781121 | 7340057 | 1720332 | --- | --- | --- | 1,36 | up   |
| 5781309 | 7112562 | 1158602 | --- | --- | --- | 1,30 | down |
| 5781437 | 7330181 | 1695709 | --- | --- | --- | 2,07 | up   |
| 5781644 | 7129688 | 1200558 | --- | --- | --- | 2,03 | down |
| 5781682 | 7086751 | 1094622 | --- | --- | --- | 1,26 | down |
| 5781714 | 7339379 | 1718345 | --- | --- | --- | 1,22 | down |
| 5781775 | 7029078 | 958874  | --- | --- | --- | 1,15 | up   |
| 5781783 | 7264808 | 1534467 | --- | --- | --- | 1,23 | up   |
| 5781797 | 7160402 | 1276158 | --- | --- | --- | 1,01 | down |
| 5781855 | 7070616 | 1057793 | --- | --- | --- | 1,16 | up   |
| 5781933 | 7364346 | 1779965 | --- | --- | --- | 1,07 | up   |
| 5781957 | 7303616 | 1631354 | --- | --- | --- | 1,02 | down |
| 5781960 | 7127540 | 1195292 | --- | --- | --- | 1,18 | down |
| 5782065 | 7133612 | 1210300 | --- | --- | --- | 1,06 | up   |
| 5782113 | 7156052 | 1265773 | --- | --- | --- | 1,04 | up   |
| 5782164 | 7172373 | 1305564 | --- | --- | --- | 2,38 | up   |
| 5782210 | 7233440 | 1456832 | --- | --- | --- | 1,07 | up   |
| 5782270 | 7037764 | 980087  | --- | --- | --- | 1,16 | up   |
| 5782278 | 7240665 | 1475826 | --- | --- | --- | 1,30 | up   |
| 5782376 | 7034353 | 972127  | --- | --- | --- | 1,37 | up   |
| 5782457 | 7316644 | 1664019 | --- | --- | --- | 1,23 | down |
| 5782486 | 7034293 | 971862  | --- | --- | --- | 1,03 | down |
| 5782504 | 7367994 | 1789255 | --- | --- | --- | 1,18 | down |
| 5782541 | 7331297 | 1698810 | --- | --- | --- | 1,15 | down |
| 5782638 | 7356115 | 1760115 | --- | --- | --- | 1,03 | down |
| 5782648 | 7263152 | 1530365 | --- | --- | --- | 1,01 | up   |
| 5782651 | 7116614 | 1168784 | --- | --- | --- | 1,16 | up   |
| 5782652 | 7132125 | 1206605 | --- | --- | --- | 1,22 | down |
| 5782657 | 7230611 | 1448802 | --- | --- | --- | 1,08 | up   |
| 5782671 | 7310670 | 1648982 | --- | --- | --- | 1,07 | up   |
| 5782748 | 7245695 | 1487060 | --- | --- | --- | 1,05 | down |
| 5782765 | 7356027 | 1759985 | --- | --- | --- | 1,19 | up   |
| 5782877 | 7333333 | 1703398 | --- | --- | --- | 1,03 | down |
| 5782899 | 7315206 | 1660023 | --- | --- | --- | 1,30 | down |
| 5782926 | 7192320 | 1356026 | --- | --- | --- | 1,06 | down |
| 5783062 | 7180630 | 1326454 | --- | --- | --- | 1,51 | up   |
| 5783218 | 7040260 | 986062  | --- | --- | --- | 1,02 | up   |
| 5783282 | 7319065 | 1669994 | --- | --- | --- | 1,05 | up   |
| 5783296 | 7052813 | 1015912 | --- | --- | --- | 1,04 | down |
| 5783341 | 7352044 | 1750011 | --- | --- | --- | 1,92 | up   |
| 5783490 | 7197638 | 1369572 | --- | --- | --- | 1,27 | down |
| 5783548 | 7176177 | 1315136 | --- | --- | --- | 1,33 | down |
| 5783560 | 7240569 | 1475514 | --- | --- | --- | 1,42 | down |
| 5783565 | 7256238 | 1513033 | --- | --- | --- | 1,44 | up   |
| 5783569 | 7057966 | 1026821 | --- | --- | --- | 1,06 | up   |
| 5783575 | 7074132 | 1066324 | --- | --- | --- | 2,08 | up   |
| 5783666 | 7228530 | 1443787 | --- | --- | --- | 1,27 | down |
| 5783697 | 7119930 | 1177200 | --- | --- | --- | 1,33 | up   |
| 5783945 | 7103337 | 1135940 | --- | --- | --- | 1,31 | up   |
| 5783949 | 7258323 | 1518471 | --- | --- | --- | 3,01 | down |
| 5783966 | 7162144 | 1280506 | --- | --- | --- | 1,09 | down |
| 5783989 | 7108122 | 1147386 | --- | --- | --- | 1,06 | up   |



|         |         |         |     |     |     |      |      |
|---------|---------|---------|-----|-----|-----|------|------|
| 5784103 | 7368004 | 1789336 | --- | --- | --- | 1,38 | up   |
| 5784127 | 7190524 | 1351175 | --- | --- | --- | 1,30 | down |
| 5784145 | 7363674 | 1778414 | --- | --- | --- | 1,19 | up   |
| 5784453 | 7253408 | 1505942 | --- | --- | --- | 1,09 | up   |
| 5784539 | 7119556 | 1176078 | --- | --- | --- | 1,05 | down |
| 5784657 | 7114108 | 1162448 | --- | --- | --- | 1,11 | up   |
| 5784729 | 7072765 | 1062731 | --- | --- | --- | 1,15 | down |
| 5784757 | 7298920 | 1618820 | --- | --- | --- | 1,24 | up   |
| 5784799 | 7071714 | 1060360 | --- | --- | --- | 1,20 | down |
| 5784886 | 7193056 | 1358269 | --- | --- | --- | 1,40 | down |
| 5784937 | 7161992 | 1280153 | --- | --- | --- | 1,18 | up   |
| 5784964 | 7176456 | 1315828 | --- | --- | --- | 1,03 | up   |
| 5784992 | 7060195 | 1031960 | --- | --- | --- | 1,33 | down |
| 5785008 | 7323545 | 1679986 | --- | --- | --- | 1,00 | down |
| 5785033 | 7286807 | 1588846 | --- | --- | --- | 1,09 | up   |
| 5785045 | 7120379 | 1178328 | --- | --- | --- | 1,64 | up   |
| 5785113 | 7334331 | 1705691 | --- | --- | --- | 1,20 | down |
| 5785169 | 7287222 | 1589719 | --- | --- | --- | 1,34 | up   |
| 5785317 | 7276231 | 1563103 | --- | --- | --- | 1,08 | down |
| 5785391 | 7170764 | 1301466 | --- | --- | --- | 1,87 | down |
| 5785455 | 7079600 | 1078632 | --- | --- | --- | 1,95 | up   |
| 5785530 | 7313905 | 1656847 | --- | --- | --- | 2,13 | down |
| 5785531 | 7341397 | 1723637 | --- | --- | --- | 1,60 | down |
| 5785769 | 7033616 | 970211  | --- | --- | --- | 2,71 | down |
| 5785770 | 7146000 | 1240659 | --- | --- | --- | 1,12 | down |
| 5785865 | 7071969 | 1060902 | --- | --- | --- | 1,85 | down |
| 5785888 | 7237719 | 1467479 | --- | --- | --- | 1,61 | down |
| 5786004 | 7321204 | 1675168 | --- | --- | --- | 1,03 | up   |
| 5786047 | 7070836 | 1058346 | --- | --- | --- | 1,07 | down |
| 5786049 | 7297589 | 1615680 | --- | --- | --- | 1,40 | up   |
| 5786052 | 7120235 | 1177952 | --- | --- | --- | 1,06 | down |
| 5786211 | 7127540 | 1195303 | --- | --- | --- | 1,41 | up   |
| 5786284 | 7189689 | 1349054 | --- | --- | --- | 1,56 | up   |
| 5786325 | 7267802 | 1541733 | --- | --- | --- | 1,36 | down |
| 5786496 | 7235076 | 1461028 | --- | --- | --- | 1,30 | down |
| 5786726 | 7303616 | 1631319 | --- | --- | --- | 1,11 | down |
| 5786728 | 7178060 | 1320158 | --- | --- | --- | 1,03 | up   |
| 5786742 | 7097680 | 1121747 | --- | --- | --- | 1,30 | down |
| 5786895 | 7360486 | 1770999 | --- | --- | --- | 1,18 | down |
| 5786966 | 7351951 | 1749819 | --- | --- | --- | 1,52 | down |
| 5786974 | 7061367 | 1034836 | --- | --- | --- | 1,64 | up   |
| 5787035 | 7233425 | 1456756 | --- | --- | --- | 1,93 | down |
| 5787086 | 7358708 | 1766577 | --- | --- | --- | 1,09 | down |
| 5787094 | 7374842 | 1808979 | --- | --- | --- | 1,17 | down |
| 5787179 | 7349643 | 1744165 | --- | --- | --- | 1,07 | down |
| 5787185 | 7115146 | 1164932 | --- | --- | --- | 1,10 | down |
| 5787217 | 7240569 | 1475515 | --- | --- | --- | 1,03 | down |
| 5787234 | 7068259 | 1051595 | --- | --- | --- | 1,27 | up   |
| 5787256 | 7183182 | 1333570 | --- | --- | --- | 1,45 | down |
| 5787351 | 7102113 | 1132808 | --- | --- | --- | 1,98 | down |
| 5787386 | 7129841 | 1200831 | --- | --- | --- | 1,09 | down |
| 5787484 | 7199341 | 1374138 | --- | --- | --- | 1,03 | up   |
| 5787566 | 7073928 | 1065803 | --- | --- | --- | 7,61 | down |
| 5787627 | 7186464 | 1341369 | --- | --- | --- | 1,20 | up   |
| 5787634 | 7070616 | 1057794 | --- | --- | --- | 1,23 | down |
| 5787643 | 7303616 | 1631331 | --- | --- | --- | 1,00 | up   |

|         |         |         |     |     |     |      |      |
|---------|---------|---------|-----|-----|-----|------|------|
| 5787702 | 7360486 | 1770941 | --- | --- | --- | 1,62 | down |
| 5787860 | 7192914 | 1357831 | --- | --- | --- | 1,23 | down |
| 5787910 | 7197056 | 1367842 | --- | --- | --- | 1,05 | down |
| 5787923 | 7373906 | 1806355 | --- | --- | --- | 1,00 | up   |
| 5787946 | 7141061 | 1228644 | --- | --- | --- | 1,07 | up   |
| 5787953 | 7244288 | 1484128 | --- | --- | --- | 1,02 | up   |
| 5787987 | 7243603 | 1482278 | --- | --- | --- | 1,02 | up   |
| 5788113 | 7069253 | 1054155 | --- | --- | --- | 1,20 | up   |
| 5788142 | 7301900 | 1626743 | --- | --- | --- | 1,10 | down |
| 5788143 | 7067670 | 1050324 | --- | --- | --- | 1,64 | up   |
| 5788176 | 7118356 | 1173203 | --- | --- | --- | 1,04 | down |
| 5788227 | 7109373 | 1150919 | --- | --- | --- | 1,07 | down |
| 5788399 | 7139708 | 1225064 | --- | --- | --- | 1,29 | up   |
| 5788408 | 7238115 | 1468638 | --- | --- | --- | 1,22 | up   |
| 5788429 | 7097525 | 1121050 | --- | --- | --- | 1,04 | down |
| 5788515 | 7257361 | 1516098 | --- | --- | --- | 1,17 | up   |
| 5788623 | 7181442 | 1328882 | --- | --- | --- | 1,45 | down |
| 5788635 | 7225304 | 1435316 | --- | --- | --- | 1,31 | down |
| 5788685 | 7087805 | 1097469 | --- | --- | --- | 1,06 | up   |
| 5788936 | 7182713 | 1332530 | --- | --- | --- | 1,04 | down |
| 5788997 | 7059584 | 1030542 | --- | --- | --- | 1,13 | down |
| 5789135 | 7041584 | 989452  | --- | --- | --- | 1,45 | down |
| 5789195 | 7086975 | 1095324 | --- | --- | --- | 1,75 | down |
| 5789200 | 7112570 | 1158681 | --- | --- | --- | 1,23 | down |
| 5789208 | 7127540 | 1195295 | --- | --- | --- | 1,03 | down |
| 5789290 | 7027795 | 956272  | --- | --- | --- | 1,17 | up   |
| 5789356 | 7133612 | 1210286 | --- | --- | --- | 1,06 | down |
| 5789379 | 7097485 | 1120948 | --- | --- | --- | 1,22 | up   |
| 5789434 | 7373633 | 1805707 | --- | --- | --- | 1,01 | up   |
| 5789453 | 7329846 | 1694992 | --- | --- | --- | 1,60 | down |
| 5789521 | 7038530 | 981859  | --- | --- | --- | 1,35 | up   |
| 5789537 | 7180620 | 1326399 | --- | --- | --- | 1,30 | down |
| 5789557 | 7228848 | 1444755 | --- | --- | --- | 1,00 | up   |
| 5789569 | 7357815 | 1764147 | --- | --- | --- | 1,10 | up   |
| 5789589 | 7248964 | 1494950 | --- | --- | --- | 1,91 | up   |
| 5789666 | 7248790 | 1494538 | --- | --- | --- | 1,48 | down |
| 5789740 | 7092549 | 1109136 | --- | --- | --- | 1,12 | up   |
| 5789778 | 7316054 | 1662299 | --- | --- | --- | 1,37 | up   |
| 5789892 | 7115880 | 1166841 | --- | --- | --- | 1,22 | up   |
| 5789999 | 7358859 | 1766965 | --- | --- | --- | 1,26 | up   |
| 5790204 | 7368912 | 1792632 | --- | --- | --- | 1,41 | up   |
| 5790226 | 7297589 | 1615620 | --- | --- | --- | 1,01 | down |
| 5790320 | 7032444 | 966751  | --- | --- | --- | 1,53 | down |
| 5790628 | 7231152 | 1450271 | --- | --- | --- | 1,31 | up   |
| 5790718 | 7155882 | 1265361 | --- | --- | --- | 1,15 | up   |
| 5790728 | 7146093 | 1240987 | --- | --- | --- | 1,07 | up   |
| 5790738 | 7231152 | 1450258 | --- | --- | --- | 1,08 | up   |
| 5790794 | 7039821 | 985069  | --- | --- | --- | 2,33 | down |
| 5790816 | 7075424 | 1069291 | --- | --- | --- | 1,03 | down |
| 5791007 | 7265259 | 1535437 | --- | --- | --- | 1,32 | up   |
| 5791025 | 7330238 | 1695962 | --- | --- | --- | 1,00 | up   |
| 5791039 | 7087282 | 1096169 | --- | --- | --- | 1,60 | up   |
| 5791058 | 7169599 | 1298451 | --- | --- | --- | 1,03 | up   |
| 5791061 | 7240206 | 1474349 | --- | --- | --- | 1,56 | up   |
| 5791063 | 7032074 | 965631  | --- | --- | --- | 1,42 | up   |
| 5791167 | 7112225 | 1157596 | --- | --- | --- | 1,31 | down |

|         |         |         |     |     |     |      |      |
|---------|---------|---------|-----|-----|-----|------|------|
| 5791324 | 7095956 | 1117045 | --- | --- | --- | 1,04 | down |
| 5791357 | 7323522 | 1679874 | --- | --- | --- | 1,14 | down |
| 5791625 | 7088723 | 1100139 | --- | --- | --- | 1,07 | up   |
| 5791631 | 7092549 | 1109188 | --- | --- | --- | 1,08 | up   |
| 5791738 | 7274780 | 1559220 | --- | --- | --- | 1,14 | down |
| 5791805 | 7057966 | 1026819 | --- | --- | --- | 1,04 | up   |
| 5791812 | 7154655 | 1262333 | --- | --- | --- | 1,34 | down |
| 5791814 | 7243130 | 1480847 | --- | --- | --- | 1,13 | down |
| 5791938 | 7274780 | 1559234 | --- | --- | --- | 1,31 | down |
| 5791959 | 7031774 | 964772  | --- | --- | --- | 1,05 | down |
| 5791971 | 7139026 | 1223499 | --- | --- | --- | 1,14 | down |
| 5792036 | 7049399 | 1008377 | --- | --- | --- | 1,23 | down |
| 5792063 | 7047524 | 1004663 | --- | --- | --- | 1,05 | down |
| 5792071 | 7339379 | 1718359 | --- | --- | --- | 1,12 | down |
| 5792097 | 7331434 | 1699210 | --- | --- | --- | 1,02 | down |
| 5792201 | 7292364 | 1602104 | --- | --- | --- | 1,11 | up   |
| 5792278 | 7210387 | 1400038 | --- | --- | --- | 1,16 | down |
| 5792583 | 7248790 | 1494498 | --- | --- | --- | 1,07 | up   |
| 5792659 | 7361073 | 1772328 | --- | --- | --- | 1,09 | up   |
| 5792697 | 7069253 | 1054166 | --- | --- | --- | 2,55 | up   |
| 5792750 | 7330727 | 1697143 | --- | --- | --- | 2,99 | up   |
| 5792813 | 7345465 | 1733842 | --- | --- | --- | 1,39 | down |
| 5792877 | 7225304 | 1435312 | --- | --- | --- | 1,22 | up   |
| 5792972 | 7060851 | 1033416 | --- | --- | --- | 1,14 | down |
| 5792984 | 7369706 | 1794801 | --- | --- | --- | 1,07 | up   |
| 5793020 | 7376566 | 1812888 | --- | --- | --- | 1,28 | up   |
| 5793029 | 7358859 | 1767017 | --- | --- | --- | 1,10 | down |
| 5793105 | 7292517 | 1602546 | --- | --- | --- | 1,19 | down |
| 5793152 | 7102976 | 1135061 | --- | --- | --- | 1,45 | up   |
| 5793160 | 7373038 | 1804283 | --- | --- | --- | 1,45 | down |
| 5793162 | 7033672 | 970354  | --- | --- | --- | 1,37 | down |
| 5793263 | 7374790 | 1808765 | --- | --- | --- | 1,56 | down |
| 5793267 | 7025652 | 950334  | --- | --- | --- | 1,05 | up   |
| 5793332 | 7086966 | 1095287 | --- | --- | --- | 1,03 | down |
| 5793362 | 7108300 | 1147910 | --- | --- | --- | 1,05 | up   |
| 5793435 | 7133612 | 1210297 | --- | --- | --- | 1,04 | down |
| 5793532 | 7112562 | 1158610 | --- | --- | --- | 1,36 | up   |
| 5793647 | 7047524 | 1004656 | --- | --- | --- | 1,83 | down |
| 5793651 | 7060851 | 1033433 | --- | --- | --- | 1,62 | down |
| 5794000 | 7088135 | 1098419 | --- | --- | --- | 1,26 | down |
| 5794003 | 7373732 | 1805974 | --- | --- | --- | 1,54 | up   |
| 5794093 | 7099650 | 1126883 | --- | --- | --- | 1,03 | down |
| 5794100 | 7210263 | 1399752 | --- | --- | --- | 1,02 | down |
| 5794110 | 7052813 | 1015942 | --- | --- | --- | 1,23 | down |
| 5794119 | 7281077 | 1575562 | --- | --- | --- | 1,09 | up   |
| 5794181 | 7358859 | 1766976 | --- | --- | --- | 1,15 | up   |
| 5794233 | 7269641 | 1546250 | --- | --- | --- | 1,26 | up   |
| 5794410 | 7133612 | 1210203 | --- | --- | --- | 1,13 | down |
| 5794486 | 7027795 | 956273  | --- | --- | --- | 1,08 | down |
| 5794519 | 7036559 | 977262  | --- | --- | --- | 1,18 | up   |
| 5794585 | 7029052 | 958798  | --- | --- | --- | 1,06 | up   |
| 5794604 | 7132125 | 1206614 | --- | --- | --- | 1,04 | up   |
| 5794605 | 7103782 | 1136947 | --- | --- | --- | 1,06 | down |
| 5794635 | 7363674 | 1778411 | --- | --- | --- | 1,40 | up   |
| 5794651 | 7114108 | 1162450 | --- | --- | --- | 1,31 | down |
| 5794745 | 7352635 | 1751445 | --- | --- | --- | 1,50 | up   |

|         |         |         |     |     |     |      |      |
|---------|---------|---------|-----|-----|-----|------|------|
| 5794766 | 7293646 | 1605408 | --- | --- | --- | 1,02 | down |
| 5794931 | 7311218 | 1650340 | --- | --- | --- | 1,33 | up   |
| 5795016 | 7235521 | 1462163 | --- | --- | --- | 1,26 | up   |
| 5795020 | 7331297 | 1698810 | --- | --- | --- | 1,01 | up   |
| 5795067 | 7059020 | 1029335 | --- | --- | --- | 1,13 | down |
| 5795113 | 7278957 | 1570393 | --- | --- | --- | 1,18 | up   |
| 5795128 | 7121866 | 1181882 | --- | --- | --- | 1,51 | up   |
| 5795177 | 7084993 | 1090671 | --- | --- | --- | 1,08 | up   |
| 5795274 | 7353441 | 1753345 | --- | --- | --- | 1,39 | up   |
| 5795279 | 7198210 | 1370964 | --- | --- | --- | 1,04 | up   |
| 5795345 | 7249503 | 1496176 | --- | --- | --- | 1,21 | up   |
| 5795435 | 7364995 | 1781297 | --- | --- | --- | 1,10 | up   |
| 5795520 | 7173863 | 1309664 | --- | --- | --- | 1,06 | down |
| 5795531 | 7076236 | 1071214 | --- | --- | --- | 1,02 | up   |
| 5795557 | 7139708 | 1225052 | --- | --- | --- | 1,12 | down |
| 5795631 | 7043379 | 993594  | --- | --- | --- | 1,03 | down |
| 5795636 | 7307721 | 1642002 | --- | --- | --- | 1,10 | up   |
| 5795729 | 7180861 | 1327184 | --- | --- | --- | 1,02 | down |
| 5795790 | 7248964 | 1494937 | --- | --- | --- | 1,14 | down |
| 5795863 | 7050780 | 1011388 | --- | --- | --- | 1,09 | up   |
| 5796009 | 7198210 | 1371002 | --- | --- | --- | 1,10 | up   |
| 5796028 | 7308679 | 1644246 | --- | --- | --- | 2,96 | down |
| 5796126 | 7268457 | 1543641 | --- | --- | --- | 1,34 | up   |
| 5796219 | 7331413 | 1699139 | --- | --- | --- | 1,21 | down |
| 5796267 | 7359551 | 1768625 | --- | --- | --- | 1,29 | up   |
| 5796320 | 7039589 | 984514  | --- | --- | --- | 1,53 | up   |
| 5796378 | 7333100 | 1702836 | --- | --- | --- | 1,12 | up   |
| 5796428 | 7297589 | 1615603 | --- | --- | --- | 1,00 | down |
| 5796436 | 7173863 | 1309701 | --- | --- | --- | 1,21 | down |
| 5796452 | 7197056 | 1367847 | --- | --- | --- | 1,08 | up   |
| 5796456 | 7350237 | 1745471 | --- | --- | --- | 1,00 | up   |
| 5796511 | 7373417 | 1805102 | --- | --- | --- | 1,03 | up   |
| 5796512 | 7340304 | 1720853 | --- | --- | --- | 1,28 | down |
| 5796528 | 7263152 | 1530380 | --- | --- | --- | 1,17 | up   |
| 5796630 | 7093806 | 1112166 | --- | --- | --- | 3,46 | down |
| 5796857 | 7071714 | 1060351 | --- | --- | --- | 1,07 | down |
| 5796893 | 7316644 | 1664006 | --- | --- | --- | 1,04 | down |
| 5796903 | 7240569 | 1475461 | --- | --- | --- | 1,13 | down |
| 5797147 | 7384179 | 1829797 | --- | --- | --- | 1,77 | down |
| 5797182 | 7358048 | 1764796 | --- | --- | --- | 1,15 | up   |
| 5797231 | 7108551 | 1148706 | --- | --- | --- | 1,29 | down |
| 5797246 | 7253408 | 1505953 | --- | --- | --- | 1,18 | up   |
| 5797301 | 7359551 | 1768623 | --- | --- | --- | 1,31 | down |
| 5797376 | 7041584 | 989453  | --- | --- | --- | 1,19 | up   |
| 5797421 | 7154655 | 1262313 | --- | --- | --- | 1,35 | down |
| 5797445 | 7211363 | 1402045 | --- | --- | --- | 1,08 | up   |
| 5797525 | 7099573 | 1126728 | --- | --- | --- | 1,17 | down |
| 5797607 | 7152974 | 1257659 | --- | --- | --- | 1,34 | up   |
| 5797624 | 7339286 | 1718105 | --- | --- | --- | 1,57 | up   |
| 5797628 | 7344406 | 1731239 | --- | --- | --- | 1,05 | up   |
| 5797685 | 7090278 | 1104135 | --- | --- | --- | 1,25 | up   |
| 5797732 | 7100257 | 1128284 | --- | --- | --- | 1,01 | up   |
| 5797738 | 7334347 | 1705778 | --- | --- | --- | 1,03 | down |
| 5797810 | 7058713 | 1028670 | --- | --- | --- | 1,01 | down |
| 5797867 | 7131360 | 1204986 | --- | --- | --- | 1,29 | up   |
| 5797881 | 7238202 | 1468952 | --- | --- | --- | 1,07 | down |

|         |         |         |     |     |     |      |      |
|---------|---------|---------|-----|-----|-----|------|------|
| 5797968 | 7065265 | 1044574 | --- | --- | --- | 1,52 | up   |
| 5797972 | 7316644 | 1664015 | --- | --- | --- | 1,36 | down |
| 5798150 | 7145669 | 1240015 | --- | --- | --- | 1,12 | down |
| 5798199 | 7131360 | 1204969 | --- | --- | --- | 1,12 | up   |
| 5798287 | 7356115 | 1760137 | --- | --- | --- | 1,37 | down |
| 5798294 | 7046605 | 1002431 | --- | --- | --- | 1,48 | up   |
| 5798303 | 7229856 | 1447074 | --- | --- | --- | 1,08 | up   |
| 5798392 | 7236358 | 1464262 | --- | --- | --- | 1,26 | up   |
| 5798427 | 7235069 | 1460979 | --- | --- | --- | 1,19 | up   |
| 5798429 | 7070836 | 1058330 | --- | --- | --- | 1,25 | down |
| 5798475 | 7225553 | 1435991 | --- | --- | --- | 1,48 | up   |
| 5798551 | 7217650 | 1417191 | --- | --- | --- | 1,22 | down |
| 5798646 | 7266706 | 1538749 | --- | --- | --- | 1,60 | down |
| 5798666 | 7231152 | 1450269 | --- | --- | --- | 1,40 | up   |
| 5798673 | 7260553 | 1524109 | --- | --- | --- | 1,21 | down |
| 5798800 | 7084999 | 1090700 | --- | --- | --- | 1,33 | down |
| 5798909 | 7198210 | 1370961 | --- | --- | --- | 1,08 | down |
| 5799065 | 7071681 | 1060274 | --- | --- | --- | 1,04 | up   |
| 5799069 | 7143455 | 1234714 | --- | --- | --- | 1,72 | down |
| 5799084 | 7281950 | 1577791 | --- | --- | --- | 1,08 | down |
| 5799097 | 7237719 | 1467485 | --- | --- | --- | 2,13 | down |
| 5799214 | 7198210 | 1370997 | --- | --- | --- | 1,04 | up   |
| 5799230 | 7240232 | 1474428 | --- | --- | --- | 1,59 | down |
| 5799270 | 7095021 | 1115129 | --- | --- | --- | 1,07 | down |
| 5799271 | 7189574 | 1348693 | --- | --- | --- | 1,05 | down |
| 5799288 | 7037764 | 979982  | --- | --- | --- | 1,50 | up   |
| 5799426 | 7337260 | 1712806 | --- | --- | --- | 1,33 | up   |
| 5799438 | 7374740 | 1808618 | --- | --- | --- | 1,15 | up   |
| 5799576 | 7240569 | 1475457 | --- | --- | --- | 1,37 | down |
| 5799584 | 7259923 | 1522531 | --- | --- | --- | 1,04 | down |
| 5799637 | 7216132 | 1413392 | --- | --- | --- | 1,83 | down |
| 5799710 | 7200129 | 1375996 | --- | --- | --- | 1,76 | down |
| 5799719 | 7197056 | 1367844 | --- | --- | --- | 1,12 | up   |
| 5799755 | 7033672 | 970346  | --- | --- | --- | 1,08 | up   |
| 5799977 | 7373633 | 1805708 | --- | --- | --- | 1,25 | up   |
| 5800162 | 7367971 | 1789125 | --- | --- | --- | 1,00 | down |
| 5800195 | 7024628 | 947422  | --- | --- | --- | 2,26 | up   |
| 5800389 | 7079673 | 1078749 | --- | --- | --- | 1,26 | up   |
| 5800405 | 7247954 | 1492358 | --- | --- | --- | 1,10 | up   |
| 5800414 | 7358623 | 1766290 | --- | --- | --- | 1,50 | up   |
| 5800428 | 7144135 | 1236327 | --- | --- | --- | 1,66 | down |
| 5800434 | 7330078 | 1695470 | --- | --- | --- | 1,18 | up   |
| 5800462 | 7373906 | 1806359 | --- | --- | --- | 1,67 | up   |
| 5800463 | 7248790 | 1494501 | --- | --- | --- | 1,29 | down |
| 5800581 | 7120379 | 1178332 | --- | --- | --- | 1,29 | down |
| 5800661 | 7210135 | 1399456 | --- | --- | --- | 1,32 | up   |
| 5800665 | 7051009 | 1011793 | --- | --- | --- | 1,15 | down |
| 5800725 | 7064220 | 1041759 | --- | --- | --- | 1,41 | down |
| 5800869 | 7319937 | 1672298 | --- | --- | --- | 1,63 | up   |
| 5800947 | 7144135 | 1236326 | --- | --- | --- | 1,09 | up   |
| 5801055 | 7113984 | 1162226 | --- | --- | --- | 1,51 | up   |
| 5801115 | 7182056 | 1330597 | --- | --- | --- | 1,48 | up   |
| 5801160 | 7062927 | 1038619 | --- | --- | --- | 1,17 | down |
| 5801269 | 7098810 | 1124656 | --- | --- | --- | 1,01 | down |
| 5801337 | 7086966 | 1095292 | --- | --- | --- | 1,71 | up   |
| 5801359 | 7350489 | 1746112 | --- | --- | --- | 1,34 | down |

|         |         |         |     |     |      |      |
|---------|---------|---------|-----|-----|------|------|
| 5801424 | 7096859 | 1119318 | --- | --- | 2,01 | up   |
| 5801645 | 7211343 | 1401970 | --- | --- | 1,21 | down |
| 5801700 | 7031774 | 964706  | --- | --- | 1,39 | down |
| 5801729 | 7356115 | 1760134 | --- | --- | 1,17 | down |
| 5801733 | 7228520 | 1443769 | --- | --- | 1,60 | down |
| 5801788 | 7050167 | 1009818 | --- | --- | 1,03 | down |
| 5801819 | 7117526 | 1171002 | --- | --- | 3,42 | up   |
| 5801913 | 7336449 | 1710627 | --- | --- | 1,13 | down |
| 5801995 | 7093936 | 1112474 | --- | --- | 2,07 | down |
| 5802084 | 7065265 | 1044557 | --- | --- | 1,08 | up   |
| 5802091 | 7075424 | 1069293 | --- | --- | 1,11 | up   |
| 5802094 | 7209927 | 1398942 | --- | --- | 1,06 | up   |
| 5802097 | 7148978 | 1248500 | --- | --- | 1,02 | up   |
| 5802189 | 7257976 | 1517705 | --- | --- | 1,50 | up   |
| 5802235 | 7363674 | 1778441 | --- | --- | 2,15 | down |
| 5802256 | 7181016 | 1327781 | --- | --- | 1,10 | up   |
| 5802278 | 7092549 | 1109160 | --- | --- | 1,03 | up   |
| 5802340 | 7344406 | 1731195 | --- | --- | 1,28 | down |
| 5802468 | 7033451 | 969772  | --- | --- | 1,61 | down |
| 5802509 | 7092549 | 1109148 | --- | --- | 1,01 | up   |
| 5802512 | 7374842 | 1808972 | --- | --- | 1,05 | down |
| 5802657 | 7070836 | 1058360 | --- | --- | 1,10 | down |
| 5802711 | 7291032 | 1599338 | --- | --- | 1,01 | up   |
| 5802824 | 7260613 | 1524276 | --- | --- | 1,01 | down |
| 5802842 | 7331297 | 1698810 | --- | --- | 1,28 | up   |
| 5802888 | 7159642 | 1274219 | --- | --- | 1,05 | down |
| 5802927 | 7271008 | 1549960 | --- | --- | 1,11 | up   |
| 5803046 | 7339379 | 1718317 | --- | --- | 1,35 | up   |
| 5803118 | 7260613 | 1524270 | --- | --- | 1,02 | up   |
| 5803228 | 7060851 | 1033418 | --- | --- | 1,38 | down |
| 5803309 | 7248790 | 1494514 | --- | --- | 1,66 | up   |
| 5803366 | 7185483 | 1338940 | --- | --- | 1,03 | down |
| 5803372 | 7073577 | 1064760 | --- | --- | 1,56 | up   |
| 5803443 | 7249503 | 1496207 | --- | --- | 1,22 | up   |
| 5803444 | 7214605 | 1409396 | --- | --- | 1,47 | up   |
| 5803537 | 7131550 | 1205557 | --- | --- | 1,06 | up   |
| 5803602 | 7186106 | 1340494 | --- | --- | 1,69 | up   |
| 5803825 | 7051009 | 1011792 | --- | --- | 1,01 | up   |
| 5803838 | 7259923 | 1522529 | --- | --- | 1,01 | up   |
| 5804143 | 7075424 | 1069281 | --- | --- | 1,17 | down |
| 5804176 | 7267802 | 1541833 | --- | --- | 1,01 | up   |
| 5804250 | 7314270 | 1657740 | --- | --- | 1,29 | down |
| 5804271 | 7350489 | 1746117 | --- | --- | 1,12 | up   |
| 5804384 | 7282343 | 1578664 | --- | --- | 1,12 | up   |
| 5804446 | 7239939 | 1473796 | --- | --- | 1,51 | up   |
| 5804601 | 7126658 | 1193137 | --- | --- | 1,23 | up   |
| 5804624 | 7186305 | 1341000 | --- | --- | 1,34 | down |
| 5804626 | 7064856 | 1043215 | --- | --- | 1,21 | down |
| 5804729 | 7316644 | 1664003 | --- | --- | 1,17 | up   |
| 5804778 | 7358859 | 1766985 | --- | --- | 1,02 | up   |
| 5804813 | 7143904 | 1235814 | --- | --- | 1,06 | down |
| 5804888 | 7174149 | 1310532 | --- | --- | 1,11 | down |
| 5804910 | 7037764 | 980095  | --- | --- | 1,20 | down |
| 5805015 | 7097240 | 1120364 | --- | --- | 1,10 | up   |
| 5805068 | 7337224 | 1712604 | --- | --- | 1,09 | down |
| 5805121 | 7365183 | 1781916 | --- | --- | 1,21 | up   |

|         |         |         |     |     |     |      |      |
|---------|---------|---------|-----|-----|-----|------|------|
| 5805141 | 7025652 | 950331  | --- | --- | --- | 1,55 | down |
| 5805287 | 7384179 | 1829774 | --- | --- | --- | 1,23 | up   |
| 5805313 | 7277783 | 1567471 | --- | --- | --- | 2,34 | up   |
| 5805431 | 7112225 | 1157577 | --- | --- | --- | 1,16 | up   |
| 5805520 | 7235069 | 1460968 | --- | --- | --- | 1,04 | up   |
| 5805526 | 7293049 | 1603880 | --- | --- | --- | 1,31 | up   |
| 5805589 | 7212735 | 1405024 | --- | --- | --- | 1,02 | down |
| 5805737 | 7127540 | 1195271 | --- | --- | --- | 1,34 | up   |
| 5805787 | 7064134 | 1041446 | --- | --- | --- | 1,06 | down |
| 5805841 | 7095021 | 1115119 | --- | --- | --- | 1,10 | up   |
| 5805940 | 7308679 | 1644254 | --- | --- | --- | 3,30 | down |
| 5806018 | 7156052 | 1265743 | --- | --- | --- | 1,37 | up   |
| 5806053 | 7031774 | 964751  | --- | --- | --- | 1,26 | down |
| 5806055 | 7274780 | 1559254 | --- | --- | --- | 1,20 | down |
| 5806101 | 7097680 | 1121736 | --- | --- | --- | 1,30 | up   |
| 5806133 | 7031774 | 964761  | --- | --- | --- | 1,17 | down |
| 5806145 | 7039223 | 983553  | --- | --- | --- | 1,27 | up   |
| 5806233 | 7346066 | 1735320 | --- | --- | --- | 1,60 | down |
| 5806268 | 7303722 | 1631711 | --- | --- | --- | 1,34 | up   |
| 5806331 | 7039463 | 984254  | --- | --- | --- | 1,52 | down |
| 5806377 | 7356115 | 1760127 | --- | --- | --- | 1,09 | down |
| 5806420 | 7184981 | 1337850 | --- | --- | --- | 1,24 | down |
| 5806465 | 7294264 | 1606835 | --- | --- | --- | 1,46 | down |
| 5806610 | 7034756 | 973241  | --- | --- | --- | 1,40 | up   |
| 5806611 | 7127540 | 1195293 | --- | --- | --- | 1,55 | down |
| 5806702 | 7171047 | 1302365 | --- | --- | --- | 1,08 | up   |
| 5806850 | 7117187 | 1170160 | --- | --- | --- | 1,04 | up   |
| 5806899 | 7147809 | 1245456 | --- | --- | --- | 1,25 | down |
| 5806917 | 7368729 | 1792054 | --- | --- | --- | 1,43 | down |
| 5807105 | 7345882 | 1734813 | --- | --- | --- | 1,06 | down |
| 5807129 | 7292517 | 1602533 | --- | --- | --- | 1,25 | down |
| 5807304 | 7231203 | 1450411 | --- | --- | --- | 1,01 | down |
| 5807350 | 7323545 | 1679965 | --- | --- | --- | 1,11 | down |
| 5807403 | 7087965 | 1098046 | --- | --- | --- | 1,10 | down |
| 5807419 | 7142081 | 1230989 | --- | --- | --- | 2,24 | up   |
| 5807496 | 7364346 | 1779971 | --- | --- | --- | 1,14 | up   |
| 5807502 | 7099573 | 1126730 | --- | --- | --- | 1,17 | up   |
| 5807573 | 7339379 | 1718350 | --- | --- | --- | 1,21 | down |
| 5807677 | 7028624 | 957997  | --- | --- | --- | 1,28 | down |
| 5807768 | 7329135 | 1693500 | --- | --- | --- | 1,05 | up   |
| 5807779 | 7025652 | 950256  | --- | --- | --- | 1,24 | down |
| 5807795 | 7056333 | 1023671 | --- | --- | --- | 1,15 | up   |
| 5807825 | 7344406 | 1731188 | --- | --- | --- | 1,29 | down |
| 5808034 | 7327650 | 1689694 | --- | --- | --- | 1,85 | down |
| 5808066 | 7241136 | 1476723 | --- | --- | --- | 1,07 | up   |
| 5808092 | 7218259 | 1418785 | --- | --- | --- | 1,17 | up   |
| 5808113 | 7289909 | 1596508 | --- | --- | --- | 1,16 | down |
| 5808233 | 7379957 | 1820633 | --- | --- | --- | 1,12 | up   |
| 5808257 | 7162144 | 1280496 | --- | --- | --- | 1,40 | down |
| 5808290 | 7280743 | 1574540 | --- | --- | --- | 1,05 | up   |
| 5808312 | 7263401 | 1530978 | --- | --- | --- | 1,55 | down |
| 5808321 | 7118356 | 1173203 | --- | --- | --- | 1,10 | up   |
| 5808334 | 7062173 | 1037024 | --- | --- | --- | 1,02 | up   |
| 5808428 | 7293757 | 1605692 | --- | --- | --- | 1,20 | up   |
| 5808540 | 7210263 | 1399752 | --- | --- | --- | 1,11 | down |
| 5808605 | 7068259 | 1051606 | --- | --- | --- | 1,04 | up   |

|         |         |         |     |     |     |      |      |
|---------|---------|---------|-----|-----|-----|------|------|
| 5808620 | 7232029 | 1452727 | --- | --- | --- | 1,01 | down |
| 5808903 | 7181961 | 1330347 | --- | --- | --- | 1,08 | up   |
| 5808918 | 7359551 | 1768623 | --- | --- | --- | 1,62 | down |
| 5808965 | 7139709 | 1225076 | --- | --- | --- | 1,02 | down |
| 5808985 | 7091954 | 1107732 | --- | --- | --- | 1,02 | down |
| 5808992 | 7049399 | 1008352 | --- | --- | --- | 1,39 | down |
| 5809009 | 7373417 | 1805088 | --- | --- | --- | 1,40 | up   |
| 5809135 | 7373678 | 1805862 | --- | --- | --- | 1,24 | up   |
| 5809142 | 7132125 | 1206619 | --- | --- | --- | 1,03 | up   |
| 5809209 | 7068942 | 1053388 | --- | --- | --- | 1,00 | up   |
| 5809285 | 7068143 | 1051298 | --- | --- | --- | 1,06 | up   |
| 5809364 | 7350993 | 1747542 | --- | --- | --- | 1,30 | up   |
| 5809382 | 7036975 | 978058  | --- | --- | --- | 1,32 | up   |
| 5809588 | 7068259 | 1051654 | --- | --- | --- | 1,14 | up   |
| 5809598 | 7247334 | 1490820 | --- | --- | --- | 1,06 | down |
| 5809630 | 7167507 | 1293131 | --- | --- | --- | 1,07 | down |
| 5809646 | 7049399 | 1008371 | --- | --- | --- | 1,09 | down |
| 5809689 | 7040260 | 986065  | --- | --- | --- | 1,06 | down |
| 5809867 | 7079600 | 1078633 | --- | --- | --- | 1,25 | down |
| 5809966 | 7229886 | 1447144 | --- | --- | --- | 1,38 | down |
| 5810040 | 7339387 | 1718381 | --- | --- | --- | 1,70 | up   |
| 5810054 | 7193056 | 1358250 | --- | --- | --- | 1,72 | up   |
| 5810061 | 7092549 | 1109187 | --- | --- | --- | 1,15 | down |
| 5810072 | 7319151 | 1670133 | --- | --- | --- | 1,41 | down |
| 5810116 | 7339110 | 1717617 | --- | --- | --- | 1,36 | up   |
| 5810184 | 7275103 | 1560206 | --- | --- | --- | 1,11 | up   |
| 5810274 | 7092549 | 1109171 | --- | --- | --- | 1,24 | down |
| 5810360 | 7358048 | 1764808 | --- | --- | --- | 1,13 | up   |
| 5810422 | 7323545 | 1679939 | --- | --- | --- | 1,12 | up   |
| 5810522 | 7380497 | 1821859 | --- | --- | --- | 1,87 | down |
| 5810588 | 7361042 | 1772277 | --- | --- | --- | 1,09 | down |
| 5810624 | 7041609 | 989585  | --- | --- | --- | 1,04 | down |
| 5810652 | 7061703 | 1035736 | --- | --- | --- | 1,23 | up   |
| 5810659 | 7047524 | 1004666 | --- | --- | --- | 1,25 | down |
| 5810698 | 7350993 | 1747536 | --- | --- | --- | 1,22 | down |
| 5810857 | 7280743 | 1574536 | --- | --- | --- | 1,00 | up   |
| 5810893 | 7097525 | 1121068 | --- | --- | --- | 1,28 | down |
| 5810922 | 7068942 | 1053385 | --- | --- | --- | 1,09 | down |
| 5810967 | 7222221 | 1428088 | --- | --- | --- | 1,00 | down |
| 5811159 | 7243130 | 1480829 | --- | --- | --- | 1,06 | up   |
| 5811194 | 7376206 | 1811981 | --- | --- | --- | 1,02 | up   |
| 5811213 | 7339379 | 1718358 | --- | --- | --- | 1,03 | up   |
| 5811453 | 7308679 | 1644245 | --- | --- | --- | 1,89 | down |
| 5811518 | 7052331 | 1014575 | --- | --- | --- | 1,26 | down |
| 5811681 | 7336931 | 1711862 | --- | --- | --- | 1,03 | down |
| 5811699 | 7086522 | 1093944 | --- | --- | --- | 1,19 | down |
| 5811730 | 7107321 | 1145325 | --- | --- | --- | 1,60 | down |
| 5811761 | 7143455 | 1234735 | --- | --- | --- | 1,12 | up   |
| 5811803 | 7050557 | 1010796 | --- | --- | --- | 1,14 | up   |
| 5811812 | 7315571 | 1661010 | --- | --- | --- | 2,68 | up   |
| 5811949 | 7142081 | 1230951 | --- | --- | --- | 1,16 | down |
| 5812030 | 7214605 | 1409392 | --- | --- | --- | 1,34 | down |
| 5812216 | 7142853 | 1232903 | --- | --- | --- | 1,59 | down |
| 5812228 | 7248790 | 1494542 | --- | --- | --- | 1,37 | down |
| 5812254 | 7170764 | 1301480 | --- | --- | --- | 1,11 | up   |
| 5812272 | 7299512 | 1620557 | --- | --- | --- | 1,18 | up   |



|         |         |         |     |     |     |      |      |
|---------|---------|---------|-----|-----|-----|------|------|
| 5812318 | 7359453 | 1768449 | --- | --- | --- | 1,20 | down |
| 5812342 | 7088625 | 1099874 | --- | --- | --- | 1,15 | down |
| 5812374 | 7341397 | 1723632 | --- | --- | --- | 1,30 | up   |
| 5812505 | 7058813 | 1028898 | --- | --- | --- | 1,79 | up   |
| 5812591 | 7278957 | 1570394 | --- | --- | --- | 1,30 | up   |
| 5812641 | 7112225 | 1157598 | --- | --- | --- | 1,07 | up   |
| 5812679 | 7276231 | 1563100 | --- | --- | --- | 1,23 | down |
| 5812740 | 7266778 | 1538854 | --- | --- | --- | 1,19 | down |
| 5812783 | 7369939 | 1795615 | --- | --- | --- | 1,17 | down |
| 5812802 | 7108300 | 1147903 | --- | --- | --- | 1,06 | up   |
| 5812848 | 7365093 | 1781622 | --- | --- | --- | 1,53 | down |
| 5812865 | 7127540 | 1195301 | --- | --- | --- | 1,11 | up   |
| 5812925 | 7333462 | 1703648 | --- | --- | --- | 1,23 | down |
| 5812954 | 7127257 | 1194804 | --- | --- | --- | 1,07 | up   |
| 5813027 | 7271128 | 1550314 | --- | --- | --- | 1,27 | down |
| 5813066 | 7111361 | 1155607 | --- | --- | --- | 1,41 | up   |
| 5813191 | 7247228 | 1490517 | --- | --- | --- | 1,19 | down |
| 5813277 | 7339110 | 1717608 | --- | --- | --- | 1,40 | up   |
| 5813321 | 7196803 | 1367340 | --- | --- | --- | 1,20 | up   |
| 5813585 | 7351953 | 1749875 | --- | --- | --- | 1,76 | down |
| 5813594 | 7065265 | 1044574 | --- | --- | --- | 1,24 | down |
| 5813627 | 7053874 | 1018338 | --- | --- | --- | 1,03 | up   |
| 5813639 | 7329846 | 1694996 | --- | --- | --- | 1,38 | down |
| 5813663 | 7248790 | 1494487 | --- | --- | --- | 1,76 | down |
| 5813687 | 7038530 | 981879  | --- | --- | --- | 1,53 | down |
| 5813753 | 7073950 | 1065939 | --- | --- | --- | 1,17 | down |
| 5813769 | 7146000 | 1240658 | --- | --- | --- | 1,25 | down |
| 5813804 | 7181016 | 1327779 | --- | --- | --- | 1,24 | up   |
| 5813938 | 7341397 | 1723651 | --- | --- | --- | 1,01 | down |
| 5813975 | 7064468 | 1042366 | --- | --- | --- | 1,00 | up   |
| 5814031 | 7033337 | 969489  | --- | --- | --- | 1,08 | down |
| 5814115 | 7316644 | 1664002 | --- | --- | --- | 1,23 | up   |
| 5814131 | 7270574 | 1548527 | --- | --- | --- | 1,62 | down |
| 5814174 | 7152726 | 1257081 | --- | --- | --- | 1,10 | up   |
| 5814205 | 7344406 | 1731211 | --- | --- | --- | 1,57 | up   |
| 5814278 | 7260613 | 1524267 | --- | --- | --- | 1,48 | up   |
| 5814282 | 7379957 | 1820632 | --- | --- | --- | 1,27 | down |
| 5814445 | 7363768 | 1778601 | --- | --- | --- | 1,57 | up   |
| 5814451 | 7226241 | 1437795 | --- | --- | --- | 1,59 | up   |
| 5814463 | 7039223 | 983561  | --- | --- | --- | 1,35 | up   |
| 5814735 | 7230886 | 1449547 | --- | --- | --- | 1,09 | up   |
| 5814743 | 7229856 | 1447084 | --- | --- | --- | 1,43 | down |
| 5814788 | 7034353 | 972126  | --- | --- | --- | 1,51 | up   |
| 5814819 | 7367948 | 1788968 | --- | --- | --- | 1,25 | up   |
| 5814837 | 7155624 | 1264724 | --- | --- | --- | 1,01 | up   |
| 5814874 | 7156372 | 1266713 | --- | --- | --- | 1,13 | down |
| 5814941 | 7263152 | 1530376 | --- | --- | --- | 1,41 | down |
| 5814994 | 7240224 | 1474389 | --- | --- | --- | 1,13 | up   |
| 5815020 | 7208710 | 1395899 | --- | --- | --- | 1,05 | up   |
| 5815184 | 7192914 | 1357821 | --- | --- | --- | 1,42 | up   |
| 5815236 | 7226241 | 1437810 | --- | --- | --- | 1,61 | down |
| 5815246 | 7384509 | 1830745 | --- | --- | --- | 1,35 | down |
| 5815260 | 7031774 | 964699  | --- | --- | --- | 1,38 | up   |
| 5815384 | 7373634 | 1805724 | --- | --- | --- | 1,67 | up   |
| 5815448 | 7072765 | 1062743 | --- | --- | --- | 1,25 | down |
| 5815477 | 7368804 | 1792261 | --- | --- | --- | 1,11 | down |

|         |         |         |     |     |     |      |      |
|---------|---------|---------|-----|-----|-----|------|------|
| 5815640 | 7279303 | 1571206 | --- | --- | --- | 2,76 | down |
| 5815685 | 7378878 | 1818324 | --- | --- | --- | 1,04 | up   |
| 5815751 | 7264274 | 1533172 | --- | --- | --- | 1,33 | up   |
| 5815776 | 7162144 | 1280507 | --- | --- | --- | 1,33 | down |
| 5816203 | 7190582 | 1351376 | --- | --- | --- | 1,27 | down |
| 5816219 | 7232340 | 1453535 | --- | --- | --- | 1,63 | down |
| 5816337 | 7258323 | 1518477 | --- | --- | --- | 4,99 | down |
| 5816373 | 7350489 | 1746123 | --- | --- | --- | 2,38 | up   |
| 5816468 | 7064468 | 1042370 | --- | --- | --- | 1,00 | down |
| 5816532 | 7263152 | 1530357 | --- | --- | --- | 1,31 | up   |
| 5816534 | 7193513 | 1359467 | --- | --- | --- | 1,26 | down |
| 5816587 | 7350993 | 1747544 | --- | --- | --- | 2,07 | down |
| 5816664 | 7068259 | 1051609 | --- | --- | --- | 1,53 | up   |
| 5816780 | 7350993 | 1747524 | --- | --- | --- | 1,06 | up   |
| 5816806 | 7051009 | 1011789 | --- | --- | --- | 1,31 | up   |
| 5816825 | 7180687 | 1326630 | --- | --- | --- | 1,03 | up   |
| 5816847 | 7060851 | 1033427 | --- | --- | --- | 1,12 | down |
| 5816894 | 7373633 | 1805707 | --- | --- | --- | 1,25 | up   |
| 5816982 | 7214605 | 1409369 | --- | --- | --- | 1,09 | up   |
| 5817022 | 7075445 | 1069344 | --- | --- | --- | 1,75 | up   |
| 5817073 | 7050726 | 1011257 | --- | --- | --- | 1,38 | up   |
| 5817157 | 7198210 | 1370980 | --- | --- | --- | 1,10 | up   |
| 5817161 | 7288397 | 1592977 | --- | --- | --- | 1,37 | up   |
| 5817172 | 7233425 | 1456776 | --- | --- | --- | 1,64 | down |
| 5817291 | 7329846 | 1694991 | --- | --- | --- | 1,28 | up   |
| 5817358 | 7249503 | 1496207 | --- | --- | --- | 1,19 | down |
| 5817402 | 7361223 | 1772629 | --- | --- | --- | 1,27 | up   |
| 5817525 | 7332059 | 1700725 | --- | --- | --- | 1,20 | up   |
| 5817549 | 7338807 | 1716812 | --- | --- | --- | 1,23 | up   |
| 5817632 | 7243130 | 1480831 | --- | --- | --- | 1,22 | up   |
| 5817790 | 7312942 | 1654171 | --- | --- | --- | 1,16 | up   |
| 5817915 | 7171034 | 1302292 | --- | --- | --- | 1,30 | up   |
| 5817949 | 7323545 | 1679921 | --- | --- | --- | 1,29 | down |
| 5817954 | 7325674 | 1685220 | --- | --- | --- | 2,62 | down |
| 5818010 | 7031774 | 964724  | --- | --- | --- | 1,14 | up   |
| 5818108 | 7307721 | 1641996 | --- | --- | --- | 1,00 | up   |
| 5818117 | 7193644 | 1359709 | --- | --- | --- | 1,14 | down |
| 5818125 | 7065655 | 1045242 | --- | --- | --- | 1,39 | up   |
| 5818166 | 7036412 | 976853  | --- | --- | --- | 1,17 | down |
| 5818222 | 7299512 | 1620553 | --- | --- | --- | 1,26 | down |
| 5818719 | 7316644 | 1664010 | --- | --- | --- | 1,63 | down |
| 5818727 | 7098077 | 1122799 | --- | --- | --- | 1,13 | up   |
| 5818743 | 7193644 | 1359708 | --- | --- | --- | 1,02 | down |
| 5818794 | 7032618 | 967333  | --- | --- | --- | 1,02 | up   |
| 5818948 | 7181105 | 1327967 | --- | --- | --- | 1,61 | down |
| 5819007 | 7072765 | 1062749 | --- | --- | --- | 1,13 | up   |
| 5819083 | 7217679 | 1417322 | --- | --- | --- | 1,22 | up   |
| 5819102 | 7156061 | 1265843 | --- | --- | --- | 1,04 | down |
| 5819120 | 7040260 | 986070  | --- | --- | --- | 1,26 | up   |
| 5819229 | 7274892 | 1559578 | --- | --- | --- | 1,31 | down |
| 5819233 | 7034293 | 971996  | --- | --- | --- | 1,47 | down |
| 5819244 | 7146093 | 1240933 | --- | --- | --- | 1,20 | up   |
| 5819267 | 7224166 | 1432687 | --- | --- | --- | 1,19 | down |
| 5819334 | 7337224 | 1712592 | --- | --- | --- | 1,08 | down |
| 5819372 | 7088625 | 1099872 | --- | --- | --- | 1,05 | down |
| 5819397 | 7344702 | 1732140 | --- | --- | --- | 1,00 | up   |

|         |         |         |     |     |     |      |      |
|---------|---------|---------|-----|-----|-----|------|------|
| 5819404 | 7188681 | 1346298 | --- | --- | --- | 2,27 | up   |
| 5819432 | 7088489 | 1099530 | --- | --- | --- | 1,22 | down |
| 5819508 | 7246866 | 1489791 | --- | --- | --- | 1,24 | down |
| 5819510 | 7253408 | 1505932 | --- | --- | --- | 1,13 | down |
| 5819515 | 7047524 | 1004658 | --- | --- | --- | 1,05 | up   |
| 5819532 | 7358859 | 1766975 | --- | --- | --- | 1,22 | down |
| 5819581 | 7070836 | 1058359 | --- | --- | --- | 1,27 | down |
| 5819629 | 7293049 | 1603888 | --- | --- | --- | 1,51 | up   |
| 5819681 | 7238115 | 1468633 | --- | --- | --- | 1,50 | down |
| 5819702 | 7045955 | 1000740 | --- | --- | --- | 1,98 | down |
| 5819714 | 7108300 | 1147916 | --- | --- | --- | 1,12 | down |
| 5819731 | 7344530 | 1731580 | --- | --- | --- | 1,09 | up   |
| 5819799 | 7243603 | 1482277 | --- | --- | --- | 1,02 | down |
| 5819908 | 7325674 | 1685225 | --- | --- | --- | 1,20 | up   |
| 5820082 | 7297274 | 1614662 | --- | --- | --- | 1,06 | down |
| 5820130 | 7287222 | 1589740 | --- | --- | --- | 1,10 | up   |
| 5820265 | 7037235 | 978574  | --- | --- | --- | 1,05 | down |
| 5820457 | 7244290 | 1484146 | --- | --- | --- | 1,07 | up   |
| 5820475 | 7181016 | 1327790 | --- | --- | --- | 1,14 | down |
| 5820481 | 7034756 | 973227  | --- | --- | --- | 2,08 | down |
| 5820486 | 7198210 | 1370998 | --- | --- | --- | 1,28 | down |
| 5820522 | 7283819 | 1582121 | --- | --- | --- | 1,42 | down |
| 5820560 | 7243130 | 1480832 | --- | --- | --- | 1,01 | down |
| 5820575 | 7376820 | 1813413 | --- | --- | --- | 1,40 | up   |
| 5820620 | 7087965 | 1098049 | --- | --- | --- | 1,33 | down |
| 5820651 | 7098126 | 1122971 | --- | --- | --- | 1,48 | up   |
| 5820658 | 7068853 | 1053105 | --- | --- | --- | 1,21 | down |
| 5820765 | 7097680 | 1121746 | --- | --- | --- | 1,13 | up   |
| 5820871 | 7210713 | 1400752 | --- | --- | --- | 1,51 | up   |
| 5821015 | 7088164 | 1098476 | --- | --- | --- | 1,31 | up   |
| 5821048 | 7197056 | 1367847 | --- | --- | --- | 1,49 | down |
| 5821309 | 7312575 | 1653361 | --- | --- | --- | 1,72 | up   |
| 5821331 | 7350993 | 1747501 | --- | --- | --- | 1,22 | down |
| 5821420 | 7145669 | 1240016 | --- | --- | --- | 1,09 | up   |
| 5821425 | 7323545 | 1679959 | --- | --- | --- | 1,72 | down |
| 5821440 | 7113483 | 1161014 | --- | --- | --- | 1,07 | down |
| 5821511 | 7284359 | 1583434 | --- | --- | --- | 1,07 | down |
| 5821531 | 7364346 | 1780019 | --- | --- | --- | 1,19 | up   |
| 5821559 | 7154584 | 1262108 | --- | --- | --- | 1,48 | down |
| 5821658 | 7378981 | 1818552 | --- | --- | --- | 1,21 | down |
| 5821748 | 7037235 | 978576  | --- | --- | --- | 1,10 | up   |
| 5821846 | 7357813 | 1764121 | --- | --- | --- | 1,00 | up   |
| 5821977 | 7116614 | 1168795 | --- | --- | --- | 1,00 | down |
| 5822061 | 7362184 | 1774827 | --- | --- | --- | 1,05 | down |
| 5822105 | 7086522 | 1093957 | --- | --- | --- | 1,89 | down |
| 5822121 | 7276650 | 1564125 | --- | --- | --- | 1,60 | down |
| 5822134 | 7030518 | 961683  | --- | --- | --- | 1,60 | up   |
| 5822155 | 7180861 | 1327184 | --- | --- | --- | 1,07 | down |
| 5822203 | 7273983 | 1557522 | --- | --- | --- | 2,35 | up   |
| 5822312 | 7349946 | 1744934 | --- | --- | --- | 1,53 | down |
| 5822340 | 7364995 | 1781296 | --- | --- | --- | 1,06 | up   |
| 5822392 | 7373678 | 1805866 | --- | --- | --- | 1,18 | up   |
| 5822661 | 7172373 | 1305579 | --- | --- | --- | 1,28 | up   |
| 5822725 | 7357566 | 1763485 | --- | --- | --- | 2,02 | down |
| 5822772 | 7073673 | 1065088 | --- | --- | --- | 1,55 | down |
| 5822835 | 7121866 | 1181882 | --- | --- | --- | 1,16 | up   |

|         |         |         |     |     |     |      |      |
|---------|---------|---------|-----|-----|-----|------|------|
| 5823114 | 7067828 | 1050788 | --- | --- | --- | 1,25 | up   |
| 5823157 | 7115362 | 1165605 | --- | --- | --- | 1,27 | down |
| 5823159 | 7236726 | 1465058 | --- | --- | --- | 1,09 | down |
| 5823317 | 7247228 | 1490528 | --- | --- | --- | 1,24 | up   |
| 5823318 | 7378997 | 1818643 | --- | --- | --- | 1,13 | down |
| 5823359 | 7179785 | 1324498 | --- | --- | --- | 1,30 | down |
| 5823427 | 7218259 | 1418802 | --- | --- | --- | 2,13 | up   |
| 5823481 | 7248790 | 1494551 | --- | --- | --- | 1,74 | down |
| 5823523 | 7331434 | 1699213 | --- | --- | --- | 1,09 | up   |
| 5823672 | 7088164 | 1098459 | --- | --- | --- | 1,57 | up   |
| 5823699 | 7101400 | 1130909 | --- | --- | --- | 1,72 | down |
| 5823793 | 7301900 | 1626741 | --- | --- | --- | 1,36 | down |
| 5823943 | 7258670 | 1519344 | --- | --- | --- | 1,05 | up   |
| 5823982 | 7323545 | 1679981 | --- | --- | --- | 1,71 | up   |
| 5824002 | 7299512 | 1620553 | --- | --- | --- | 1,20 | down |
| 5824041 | 7127540 | 1195297 | --- | --- | --- | 1,21 | down |
| 5824043 | 7336250 | 1710171 | --- | --- | --- | 1,23 | down |
| 5824103 | 7263152 | 1530373 | --- | --- | --- | 1,16 | down |
| 5824126 | 7281923 | 1577693 | --- | --- | --- | 1,47 | up   |
| 5824320 | 7138047 | 1221238 | --- | --- | --- | 1,03 | up   |
| 5824371 | 7050930 | 1011625 | --- | --- | --- | 1,13 | down |
| 5824641 | 7340057 | 1720331 | --- | --- | --- | 1,32 | down |
| 5824737 | 7069830 | 1055588 | --- | --- | --- | 1,71 | down |
| 5824777 | 7031774 | 964726  | --- | --- | --- | 1,00 | up   |
| 5824840 | 7248790 | 1494510 | --- | --- | --- | 1,02 | down |
| 5824859 | 7315571 | 1661011 | --- | --- | --- | 2,03 | up   |
| 5825013 | 7238115 | 1468582 | --- | --- | --- | 1,14 | up   |
| 5825064 | 7216132 | 1413398 | --- | --- | --- | 1,01 | down |
| 5825108 | 7376820 | 1813398 | --- | --- | --- | 1,96 | up   |
| 5825130 | 7243130 | 1480915 | --- | --- | --- | 1,16 | down |
| 5825149 | 7039223 | 983573  | --- | --- | --- | 1,30 | up   |
| 5825275 | 7232340 | 1453530 | --- | --- | --- | 1,24 | up   |
| 5825328 | 7131360 | 1204969 | --- | --- | --- | 1,21 | up   |
| 5825332 | 7052385 | 1014793 | --- | --- | --- | 1,05 | up   |
| 5825399 | 7069464 | 1054660 | --- | --- | --- | 1,97 | down |
| 5825432 | 7286807 | 1588832 | --- | --- | --- | 1,03 | up   |
| 5825471 | 7192696 | 1357177 | --- | --- | --- | 1,06 | up   |
| 5825591 | 7163227 | 1282805 | --- | --- | --- | 1,60 | down |
| 5825685 | 7068853 | 1053096 | --- | --- | --- | 1,41 | down |
| 5825844 | 7266706 | 1538746 | --- | --- | --- | 1,10 | up   |
| 5825971 | 7200545 | 1376920 | --- | --- | --- | 1,49 | up   |
| 5826008 | 7350237 | 1745484 | --- | --- | --- | 1,08 | down |
| 5826059 | 7248964 | 1494938 | --- | --- | --- | 1,14 | down |
| 5826146 | 7268457 | 1543637 | --- | --- | --- | 1,19 | up   |
| 5826285 | 7068504 | 1052169 | --- | --- | --- | 1,04 | down |
| 5826380 | 7036975 | 978064  | --- | --- | --- | 2,14 | down |
| 5826503 | 7049118 | 1007763 | --- | --- | --- | 1,20 | up   |
| 5826537 | 7034532 | 972653  | --- | --- | --- | 1,08 | down |
| 5826850 | 7098810 | 1124648 | --- | --- | --- | 1,42 | down |
| 5826857 | 7331413 | 1699137 | --- | --- | --- | 1,08 | up   |
| 5826861 | 7357815 | 1764135 | --- | --- | --- | 1,19 | up   |
| 5826915 | 7358859 | 1767013 | --- | --- | --- | 1,96 | up   |
| 5827060 | 7146982 | 1243295 | --- | --- | --- | 1,30 | up   |
| 5827100 | 7381352 | 1823744 | --- | --- | --- | 1,21 | up   |
| 5827122 | 7340990 | 1722508 | --- | --- | --- | 1,15 | up   |
| 5827143 | 7240569 | 1475393 | --- | --- | --- | 1,69 | down |

|         |         |         |     |     |     |      |      |
|---------|---------|---------|-----|-----|-----|------|------|
| 5827186 | 7068853 | 1053126 | --- | --- | --- | 1,11 | down |
| 5827215 | 7260613 | 1524273 | --- | --- | --- | 1,20 | up   |
| 5827650 | 7203872 | 1384749 | --- | --- | --- | 1,02 | up   |
| 5827656 | 7360486 | 1771011 | --- | --- | --- | 1,07 | down |
| 5827658 | 7156061 | 1265843 | --- | --- | --- | 1,24 | down |
| 5827704 | 7225553 | 1435988 | --- | --- | --- | 1,55 | up   |
| 5827961 | 7103811 | 1137055 | --- | --- | --- | 1,01 | down |
| 5828038 | 7180630 | 1326455 | --- | --- | --- | 1,59 | up   |
| 5828052 | 7188681 | 1346296 | --- | --- | --- | 1,02 | down |
| 5828064 | 7244378 | 1484407 | --- | --- | --- | 1,53 | up   |
| 5828080 | 7351951 | 1749833 | --- | --- | --- | 1,10 | up   |
| 5828094 | 7112225 | 1157610 | --- | --- | --- | 1,38 | down |
| 5828137 | 7068853 | 1053108 | --- | --- | --- | 1,49 | down |
| 5828176 | 7033672 | 970351  | --- | --- | --- | 1,36 | up   |
| 5828205 | 7231835 | 1452289 | --- | --- | --- | 1,09 | down |
| 5828217 | 7025652 | 950285  | --- | --- | --- | 1,08 | up   |
| 5828253 | 7071264 | 1059362 | --- | --- | --- | 1,28 | up   |
| 5828266 | 7025652 | 950333  | --- | --- | --- | 1,00 | up   |
| 5828304 | 7321029 | 1674832 | --- | --- | --- | 1,56 | up   |
| 5828499 | 7193056 | 1358271 | --- | --- | --- | 1,18 | up   |
| 5828622 | 7311218 | 1650353 | --- | --- | --- | 1,00 | down |
| 5828731 | 7067670 | 1050307 | --- | --- | --- | 1,70 | up   |
| 5828893 | 7331829 | 1700178 | --- | --- | --- | 1,11 | up   |
| 5828899 | 7261019 | 1525281 | --- | --- | --- | 1,77 | down |
| 5829392 | 7070869 | 1058470 | --- | --- | --- | 1,04 | up   |
| 5829455 | 7239752 | 1473177 | --- | --- | --- | 1,45 | down |
| 5829521 | 7056333 | 1023676 | --- | --- | --- | 1,01 | down |
| 5829598 | 7038669 | 982179  | --- | --- | --- | 1,06 | down |
| 5829683 | 7043535 | 994105  | --- | --- | --- | 1,38 | down |
| 5829735 | 7065265 | 1044574 | --- | --- | --- | 1,03 | down |
| 5829797 | 7331434 | 1699217 | --- | --- | --- | 1,59 | up   |
| 5830008 | 7364346 | 1779994 | --- | --- | --- | 1,22 | up   |
| 5830271 | 7039589 | 984512  | --- | --- | --- | 1,08 | down |
| 5830573 | 7360486 | 1770967 | --- | --- | --- | 1,02 | up   |
| 5830585 | 7133612 | 1210248 | --- | --- | --- | 1,05 | down |
| 5830600 | 7323560 | 1680040 | --- | --- | --- | 1,16 | down |
| 5830787 | 7242451 | 1479338 | --- | --- | --- | 2,27 | down |
| 5830863 | 7162144 | 1280515 | --- | --- | --- | 1,07 | up   |
| 5830889 | 7218259 | 1418795 | --- | --- | --- | 1,58 | up   |
| 5830995 | 7358859 | 1766973 | --- | --- | --- | 1,26 | down |
| 5831118 | 7038530 | 981871  | --- | --- | --- | 1,74 | up   |
| 5831123 | 7248790 | 1494489 | --- | --- | --- | 1,54 | up   |
| 5831355 | 7333462 | 1703638 | --- | --- | --- | 1,04 | down |
| 5831489 | 7041609 | 989574  | --- | --- | --- | 1,08 | down |
| 5831594 | 7068259 | 1051592 | --- | --- | --- | 1,07 | up   |
| 5831596 | 7032204 | 966120  | --- | --- | --- | 1,00 | down |
| 5831638 | 7073950 | 1065905 | --- | --- | --- | 1,35 | down |
| 5831709 | 7092549 | 1109134 | --- | --- | --- | 1,15 | up   |
| 5831776 | 7362184 | 1774818 | --- | --- | --- | 1,15 | up   |
| 5831880 | 7053874 | 1018311 | --- | --- | --- | 1,17 | up   |
| 5831910 | 7370843 | 1798376 | --- | --- | --- | 1,88 | up   |
| 5831954 | 7064468 | 1042334 | --- | --- | --- | 1,20 | up   |
| 5831989 | 7159036 | 1272969 | --- | --- | --- | 1,41 | up   |
| 5832051 | 7373633 | 1805703 | --- | --- | --- | 1,29 | down |
| 5832114 | 7116103 | 1167596 | --- | --- | --- | 4,24 | up   |
| 5832233 | 7240569 | 1475464 | --- | --- | --- | 1,26 | up   |

|         |         |         |     |     |     |      |      |
|---------|---------|---------|-----|-----|-----|------|------|
| 5832237 | 7316644 | 1664033 | --- | --- | --- | 1,02 | up   |
| 5832277 | 7237719 | 1467488 | --- | --- | --- | 1,04 | down |
| 5832278 | 7240665 | 1475818 | --- | --- | --- | 1,20 | up   |
| 5832330 | 7359426 | 1768372 | --- | --- | --- | 1,11 | down |
| 5832472 | 7029770 | 960153  | --- | --- | --- | 1,00 | down |
| 5832530 | 7350237 | 1745475 | --- | --- | --- | 1,16 | down |
| 5832615 | 7274780 | 1559245 | --- | --- | --- | 1,77 | down |
| 5832686 | 7222221 | 1428088 | --- | --- | --- | 1,44 | down |
| 5832693 | 7093806 | 1112149 | --- | --- | --- | 1,17 | down |
| 5832705 | 7320337 | 1673331 | --- | --- | --- | 1,14 | down |
| 5832758 | 7172373 | 1305587 | --- | --- | --- | 1,05 | up   |
| 5832802 | 7036412 | 976863  | --- | --- | --- | 1,29 | down |
| 5832955 | 7249503 | 1496208 | --- | --- | --- | 1,01 | down |
| 5833001 | 7229856 | 1447072 | --- | --- | --- | 1,37 | down |
| 5833004 | 7226241 | 1437806 | --- | --- | --- | 1,11 | down |
| 5833080 | 7287222 | 1589716 | --- | --- | --- | 1,24 | down |
| 5833112 | 7094139 | 1112921 | --- | --- | --- | 1,27 | down |
| 5833176 | 7168858 | 1296832 | --- | --- | --- | 2,06 | down |
| 5833184 | 7123421 | 1185828 | --- | --- | --- | 1,07 | down |
| 5833248 | 7067614 | 1050196 | --- | --- | --- | 1,27 | down |
| 5833304 | 7243647 | 1482418 | --- | --- | --- | 1,61 | down |
| 5833365 | 7107926 | 1146838 | --- | --- | --- | 1,13 | down |
| 5833520 | 7186688 | 1341848 | --- | --- | --- | 1,23 | down |
| 5833587 | 7323545 | 1679943 | --- | --- | --- | 1,04 | up   |
| 5833611 | 7337522 | 1713618 | --- | --- | --- | 1,41 | down |
| 5833618 | 7031774 | 964692  | --- | --- | --- | 1,52 | up   |
| 5833635 | 7060851 | 1033413 | --- | --- | --- | 1,27 | down |
| 5833746 | 7345465 | 1733864 | --- | --- | --- | 1,49 | up   |
| 5833866 | 7350993 | 1747496 | --- | --- | --- | 1,00 | up   |
| 5833935 | 7189669 | 1348964 | --- | --- | --- | 1,18 | down |
| 5834089 | 7284359 | 1583435 | --- | --- | --- | 1,12 | up   |
| 5834111 | 7037764 | 980074  | --- | --- | --- | 1,27 | down |
| 5834148 | 7189689 | 1349054 | --- | --- | --- | 1,15 | up   |
| 5834307 | 7337522 | 1713593 | --- | --- | --- | 1,31 | down |
| 5834354 | 7217650 | 1417185 | --- | --- | --- | 1,09 | up   |
| 5834465 | 7239752 | 1473190 | --- | --- | --- | 1,03 | up   |
| 5834479 | 7245874 | 1487596 | --- | --- | --- | 1,07 | up   |
| 5834514 | 7127691 | 1195631 | --- | --- | --- | 1,30 | down |
| 5834612 | 7156061 | 1265843 | --- | --- | --- | 1,27 | down |
| 5834694 | 7233923 | 1458164 | --- | --- | --- | 1,35 | down |
| 5834737 | 7171034 | 1302275 | --- | --- | --- | 1,04 | up   |
| 5834943 | 7264808 | 1534465 | --- | --- | --- | 1,06 | down |
| 5835042 | 7319259 | 1670402 | --- | --- | --- | 1,26 | up   |
| 5835158 | 7279194 | 1571005 | --- | --- | --- | 1,25 | up   |
| 5835161 | 7083031 | 1086286 | --- | --- | --- | 1,00 | up   |
| 5835162 | 7277783 | 1567457 | --- | --- | --- | 2,83 | up   |
| 5835298 | 7240569 | 1475478 | --- | --- | --- | 1,30 | down |
| 5835559 | 7263248 | 1530617 | --- | --- | --- | 1,21 | down |
| 5835722 | 7059584 | 1030547 | --- | --- | --- | 1,16 | down |
| 5835760 | 7236358 | 1464221 | --- | --- | --- | 1,02 | up   |
| 5835773 | 7291054 | 1599408 | --- | --- | --- | 1,35 | up   |
| 5835819 | 7227313 | 1440674 | --- | --- | --- | 1,24 | down |
| 5835872 | 7293757 | 1605684 | --- | --- | --- | 1,07 | up   |
| 5835915 | 7172988 | 1307278 | --- | --- | --- | 1,10 | up   |
| 5836010 | 7280743 | 1574488 | --- | --- | --- | 1,16 | down |
| 5836250 | 7092549 | 1109141 | --- | --- | --- | 1,21 | down |

|         |         |         |     |     |     |      |      |
|---------|---------|---------|-----|-----|-----|------|------|
| 5836303 | 7178060 | 1320158 | --- | --- | --- | 1,03 | up   |
| 5836455 | 7243603 | 1482282 | --- | --- | --- | 1,23 | down |
| 5836474 | 7156061 | 1265825 | --- | --- | --- | 1,42 | down |
| 5836488 | 7312566 | 1653299 | --- | --- | --- | 1,30 | down |
| 5836513 | 7145669 | 1240007 | --- | --- | --- | 1,04 | up   |
| 5836542 | 7082098 | 1084116 | --- | --- | --- | 1,20 | up   |
| 5836638 | 7086751 | 1094625 | --- | --- | --- | 1,15 | down |
| 5836681 | 7267380 | 1540398 | --- | --- | --- | 1,28 | down |
| 5836704 | 7083021 | 1086216 | --- | --- | --- | 1,15 | up   |
| 5836707 | 7311218 | 1650351 | --- | --- | --- | 1,06 | down |
| 5836877 | 7150631 | 1252164 | --- | --- | --- | 1,37 | down |
| 5836993 | 7293757 | 1605679 | --- | --- | --- | 1,04 | down |
| 5837046 | 7226272 | 1437947 | --- | --- | --- | 1,24 | up   |
| 5837080 | 7102976 | 1135047 | --- | --- | --- | 1,14 | down |
| 5837107 | 7384509 | 1830754 | --- | --- | --- | 1,16 | up   |
| 5837118 | 7248964 | 1494940 | --- | --- | --- | 1,44 | down |
| 5837151 | 7086966 | 1095249 | --- | --- | --- | 1,12 | up   |
| 5837269 | 7049399 | 1008385 | --- | --- | --- | 1,52 | down |
| 5837574 | 7279303 | 1571206 | --- | --- | --- | 1,68 | down |
| 5837585 | 7025652 | 950235  | --- | --- | --- | 1,19 | down |
| 5837586 | 7056333 | 1023679 | --- | --- | --- | 1,18 | down |
| 5837630 | 7031774 | 964779  | --- | --- | --- | 1,15 | down |
| 5837659 | 7039589 | 984514  | --- | --- | --- | 3,75 | up   |
| 5837873 | 7336250 | 1710170 | --- | --- | --- | 1,07 | up   |
| 5837892 | 7059563 | 1030499 | --- | --- | --- | 1,08 | up   |
| 5837907 | 7239939 | 1473795 | --- | --- | --- | 1,09 | up   |
| 5838021 | 7092549 | 1109209 | --- | --- | --- | 1,51 | up   |
| 5838082 | 7050930 | 1011628 | --- | --- | --- | 1,15 | up   |
| 5838160 | 7378546 | 1817601 | --- | --- | --- | 1,29 | down |
| 5838301 | 7240569 | 1475386 | --- | --- | --- | 1,21 | up   |
| 5838335 | 7199476 | 1374540 | --- | --- | --- | 1,09 | down |
| 5838523 | 7333100 | 1702838 | --- | --- | --- | 2,07 | down |
| 5838642 | 7189184 | 1347597 | --- | --- | --- | 1,48 | down |
| 5838814 | 7117158 | 1170034 | --- | --- | --- | 1,19 | down |
| 5838950 | 7028624 | 957994  | --- | --- | --- | 1,06 | up   |
| 5839018 | 7247229 | 1490543 | --- | --- | --- | 1,07 | up   |
| 5839131 | 7244290 | 1484149 | --- | --- | --- | 1,35 | up   |
| 5839335 | 7037764 | 980106  | --- | --- | --- | 1,28 | up   |
| 5839342 | 7073854 | 1065627 | --- | --- | --- | 1,60 | up   |
| 5839443 | 7245874 | 1487596 | --- | --- | --- | 1,20 | up   |
| 5839465 | 7143240 | 1234173 | --- | --- | --- | 1,10 | up   |
| 5839503 | 7068504 | 1052168 | --- | --- | --- | 1,68 | up   |
| 5839524 | 7321029 | 1674807 | --- | --- | --- | 1,25 | up   |
| 5839547 | 7344406 | 1731199 | --- | --- | --- | 1,14 | up   |
| 5839565 | 7162144 | 1280503 | --- | --- | --- | 1,05 | up   |
| 5839581 | 7321414 | 1675637 | --- | --- | --- | 1,02 | down |
| 5839586 | 7368986 | 1792880 | --- | --- | --- | 2,11 | down |
| 5839609 | 7193056 | 1358273 | --- | --- | --- | 1,00 | down |
| 5839635 | 7154655 | 1262336 | --- | --- | --- | 1,34 | up   |
| 5839651 | 7083021 | 1086210 | --- | --- | --- | 1,33 | up   |
| 5839718 | 7277783 | 1567431 | --- | --- | --- | 1,79 | up   |
| 5839728 | 7025652 | 950220  | --- | --- | --- | 1,04 | up   |
| 5839737 | 7043535 | 994106  | --- | --- | --- | 1,19 | down |
| 5839770 | 7200545 | 1376899 | --- | --- | --- | 1,17 | down |
| 5840010 | 7314270 | 1657723 | --- | --- | --- | 1,36 | up   |
| 5840140 | 7378602 | 1817709 | --- | --- | --- | 1,29 | down |

|         |         |         |     |     |     |      |      |
|---------|---------|---------|-----|-----|-----|------|------|
| 5840162 | 7301022 | 1624256 | --- | --- | --- | 1,08 | down |
| 5840253 | 7172988 | 1307300 | --- | --- | --- | 1,86 | down |
| 5840284 | 7036412 | 976876  | --- | --- | --- | 1,00 | up   |
| 5840360 | 7069830 | 1055644 | --- | --- | --- | 1,46 | down |
| 5840374 | 7369712 | 1794831 | --- | --- | --- | 1,01 | down |
| 5840493 | 7350993 | 1747556 | --- | --- | --- | 1,01 | up   |
| 5840532 | 7053878 | 1018372 | --- | --- | --- | 1,03 | up   |
| 5840548 | 7038316 | 981463  | --- | --- | --- | 1,06 | up   |
| 5840735 | 7232029 | 1452789 | --- | --- | --- | 1,49 | down |
| 5840798 | 7256191 | 1512867 | --- | --- | --- | 1,07 | up   |
| 5840886 | 7034293 | 971907  | --- | --- | --- | 1,33 | down |
| 5841054 | 7331297 | 1698805 | --- | --- | --- | 1,49 | down |
| 5841057 | 7350993 | 1747502 | --- | --- | --- | 1,17 | up   |
| 5841131 | 7059020 | 1029346 | --- | --- | --- | 1,08 | up   |
| 5841146 | 7231775 | 1452134 | --- | --- | --- | 2,58 | down |
| 5841238 | 7295410 | 1609793 | --- | --- | --- | 1,02 | down |
| 5841315 | 7099517 | 1126503 | --- | --- | --- | 1,60 | down |
| 5841418 | 7384509 | 1830743 | --- | --- | --- | 1,02 | up   |
| 5841430 | 7156061 | 1265838 | --- | --- | --- | 1,07 | up   |
| 5841527 | 7233923 | 1458163 | --- | --- | --- | 2,25 | down |
| 5841703 | 7337845 | 1714352 | --- | --- | --- | 1,15 | down |
| 5841721 | 7210600 | 1400525 | --- | --- | --- | 1,17 | down |
| 5841764 | 7031774 | 964650  | --- | --- | --- | 1,07 | up   |
| 5841828 | 7384179 | 1829771 | --- | --- | --- | 1,00 | up   |
| 5841830 | 7279303 | 1571200 | --- | --- | --- | 1,76 | down |
| 5841963 | 7240224 | 1474389 | --- | --- | --- | 1,04 | down |
| 5842285 | 7156170 | 1266282 | --- | --- | --- | 1,05 | up   |
| 5842330 | 7236254 | 1464072 | --- | --- | --- | 1,05 | up   |
| 5842502 | 7277719 | 1567087 | --- | --- | --- | 1,04 | down |
| 5842810 | 7035344 | 974297  | --- | --- | --- | 1,06 | down |
| 5842833 | 7084993 | 1090683 | --- | --- | --- | 1,40 | up   |
| 5843009 | 7358048 | 1764815 | --- | --- | --- | 1,20 | up   |
| 5843013 | 7264797 | 1534444 | --- | --- | --- | 1,20 | down |
| 5843176 | 7086966 | 1095287 | --- | --- | --- | 2,05 | down |
| 5843226 | 7037764 | 979988  | --- | --- | --- | 1,22 | down |
| 5843240 | 7311218 | 1650337 | --- | --- | --- | 1,05 | down |
| 5843346 | 7038530 | 981885  | --- | --- | --- | 1,24 | down |
| 5843382 | 7039463 | 984254  | --- | --- | --- | 1,19 | up   |
| 5843391 | 7256191 | 1512882 | --- | --- | --- | 1,02 | up   |
| 5843462 | 7226241 | 1437803 | --- | --- | --- | 1,24 | up   |
| 5843563 | 7087965 | 1098056 | --- | --- | --- | 2,02 | up   |
| 5843616 | 7340838 | 1722077 | --- | --- | --- | 1,04 | up   |
| 5843683 | 7374842 | 1808975 | --- | --- | --- | 1,83 | down |
| 5843739 | 7247229 | 1490546 | --- | --- | --- | 1,19 | down |
| 5843741 | 7096859 | 1119321 | --- | --- | --- | 1,10 | down |
| 5843795 | 7357815 | 1764134 | --- | --- | --- | 1,68 | up   |
| 5843908 | 7364346 | 1779992 | --- | --- | --- | 1,39 | up   |
| 5843979 | 7083021 | 1086210 | --- | --- | --- | 1,00 | down |
| 5843992 | 7286807 | 1588796 | --- | --- | --- | 1,01 | down |
| 5844019 | 7098126 | 1122974 | --- | --- | --- | 1,46 | down |
| 5844093 | 7340757 | 1721902 | --- | --- | --- | 1,24 | up   |
| 5844131 | 7179785 | 1324499 | --- | --- | --- | 1,72 | up   |
| 5844251 | 7117187 | 1170158 | --- | --- | --- | 1,83 | down |
| 5844294 | 7236991 | 1465783 | --- | --- | --- | 1,07 | up   |
| 5844395 | 7108300 | 1147913 | --- | --- | --- | 1,56 | down |
| 5844508 | 7364346 | 1779985 | --- | --- | --- | 1,27 | up   |



|         |         |         |     |     |     |      |      |
|---------|---------|---------|-----|-----|-----|------|------|
| 5844605 | 7217747 | 1417507 | --- | --- | --- | 1,18 | up   |
| 5844641 | 7038971 | 982983  | --- | --- | --- | 1,43 | down |
| 5844827 | 7065655 | 1045265 | --- | --- | --- | 1,18 | up   |
| 5844920 | 7370128 | 1796168 | --- | --- | --- | 1,03 | up   |
| 5844942 | 7368986 | 1792880 | --- | --- | --- | 1,60 | down |
| 5844953 | 7331297 | 1698803 | --- | --- | --- | 1,44 | down |
| 5844984 | 7346066 | 1735323 | --- | --- | --- | 2,39 | down |
| 5845004 | 7360486 | 1771009 | --- | --- | --- | 1,36 | down |
| 5845128 | 7212735 | 1405028 | --- | --- | --- | 1,00 | up   |
| 5845142 | 7371682 | 1800776 | --- | --- | --- | 1,65 | down |
| 5845228 | 7329846 | 1694992 | --- | --- | --- | 1,19 | up   |
| 5845230 | 7232340 | 1453528 | --- | --- | --- | 1,77 | down |
| 5845313 | 7028624 | 957998  | --- | --- | --- | 1,07 | up   |
| 5845316 | 7290288 | 1597339 | --- | --- | --- | 1,12 | up   |
| 5845376 | 7217143 | 1415592 | --- | --- | --- | 1,27 | down |
| 5845455 | 7068853 | 1053117 | --- | --- | --- | 1,04 | up   |
| 5845604 | 7364346 | 1779968 | --- | --- | --- | 1,60 | down |
| 5845654 | 7233425 | 1456794 | --- | --- | --- | 2,07 | down |
| 5845705 | 7065827 | 1045721 | --- | --- | --- | 1,81 | down |
| 5845752 | 7280743 | 1574516 | --- | --- | --- | 1,49 | down |
| 5845928 | 7181590 | 1329433 | --- | --- | --- | 1,03 | up   |
| 5846039 | 7380497 | 1821848 | --- | --- | --- | 1,70 | down |
| 5846110 | 7192186 | 1355614 | --- | --- | --- | 1,05 | up   |
| 5846152 | 7287222 | 1589716 | --- | --- | --- | 1,30 | down |
| 5846193 | 7096859 | 1119311 | --- | --- | --- | 1,30 | down |
| 5846236 | 7189778 | 1349289 | --- | --- | --- | 1,65 | up   |
| 5846244 | 7180721 | 1326698 | --- | --- | --- | 1,02 | up   |
| 5846288 | 7069253 | 1054157 | --- | --- | --- | 1,37 | up   |
| 5846470 | 7343868 | 1729856 | --- | --- | --- | 1,07 | up   |
| 5846698 | 7253408 | 1505934 | --- | --- | --- | 1,06 | up   |
| 5846919 | 7098366 | 1123610 | --- | --- | --- | 1,42 | up   |
| 5846920 | 7189574 | 1348711 | --- | --- | --- | 1,10 | up   |
| 5847032 | 7352046 | 1750038 | --- | --- | --- | 1,02 | up   |
| 5847058 | 7378997 | 1818654 | --- | --- | --- | 1,23 | down |
| 5847255 | 7232340 | 1453523 | --- | --- | --- | 2,04 | down |
| 5847276 | 7358048 | 1764799 | --- | --- | --- | 1,03 | up   |
| 5847287 | 7148978 | 1248452 | --- | --- | --- | 1,12 | down |
| 5847323 | 7180630 | 1326455 | --- | --- | --- | 1,15 | up   |
| 5847324 | 7249503 | 1496173 | --- | --- | --- | 1,02 | up   |
| 5847329 | 7168858 | 1296827 | --- | --- | --- | 1,43 | down |
| 5847392 | 7176456 | 1315798 | --- | --- | --- | 1,03 | up   |
| 5847424 | 7268736 | 1544314 | --- | --- | --- | 1,03 | down |
| 5847550 | 7051009 | 1011786 | --- | --- | --- | 1,21 | up   |
| 5847582 | 7069464 | 1054665 | --- | --- | --- | 1,75 | up   |
| 5847606 | 7263152 | 1530384 | --- | --- | --- | 1,36 | up   |
| 5847708 | 7339379 | 1718361 | --- | --- | --- | 1,16 | down |
| 5847768 | 7357890 | 1764396 | --- | --- | --- | 1,03 | up   |
| 5847891 | 7030233 | 961161  | --- | --- | --- | 2,14 | up   |
| 5847938 | 7170764 | 1301484 | --- | --- | --- | 1,13 | down |
| 5847978 | 7373633 | 1805711 | --- | --- | --- | 1,26 | up   |
| 5847987 | 7086664 | 1094285 | --- | --- | --- | 1,28 | down |
| 5848096 | 7162177 | 1280583 | --- | --- | --- | 1,13 | up   |
| 5848179 | 7156052 | 1265752 | --- | --- | --- | 1,10 | down |
| 5848606 | 7159027 | 1272742 | --- | --- | --- | 1,06 | up   |
| 5848667 | 7120827 | 1179299 | --- | --- | --- | 3,17 | down |
| 5848811 | 7337522 | 1713620 | --- | --- | --- | 1,90 | up   |

|         |         |         |     |     |     |      |      |
|---------|---------|---------|-----|-----|-----|------|------|
| 5848819 | 7327169 | 1688463 | --- | --- | --- | 1,15 | up   |
| 5848824 | 7193644 | 1359713 | --- | --- | --- | 1,49 | down |
| 5848826 | 7301890 | 1626677 | --- | --- | --- | 3,19 | up   |
| 5848884 | 7237719 | 1467530 | --- | --- | --- | 1,13 | up   |
| 5848897 | 7249503 | 1496210 | --- | --- | --- | 1,18 | up   |
| 5849025 | 7072754 | 1062659 | --- | --- | --- | 1,08 | up   |
| 5849185 | 7072765 | 1062745 | --- | --- | --- | 1,14 | up   |
| 5849208 | 7100257 | 1128235 | --- | --- | --- | 1,16 | up   |
| 5849229 | 7225553 | 1435971 | --- | --- | --- | 1,07 | up   |
| 5849260 | 7240569 | 1475499 | --- | --- | --- | 1,03 | up   |
| 5849298 | 7192696 | 1357182 | --- | --- | --- | 1,02 | up   |
| 5849303 | 7225553 | 1435980 | --- | --- | --- | 1,40 | down |
| 5849568 | 7373678 | 1805875 | --- | --- | --- | 1,06 | up   |
| 5849603 | 7253272 | 1505575 | --- | --- | --- | 1,07 | down |
| 5849609 | 7271213 | 1550633 | --- | --- | --- | 1,20 | up   |
| 5849654 | 7245921 | 1487689 | --- | --- | --- | 1,59 | down |
| 5849754 | 7097680 | 1121714 | --- | --- | --- | 1,17 | down |
| 5849775 | 7226241 | 1437767 | --- | --- | --- | 1,03 | down |
| 5849826 | 7314270 | 1657722 | --- | --- | --- | 1,36 | down |
| 5849863 | 7271643 | 1551700 | --- | --- | --- | 1,64 | up   |
| 5849911 | 7327650 | 1689735 | --- | --- | --- | 1,22 | up   |
| 5850136 | 7162959 | 1282086 | --- | --- | --- | 1,07 | down |
| 5850158 | 7238115 | 1468672 | --- | --- | --- | 1,42 | down |
| 5850196 | 7257976 | 1517713 | --- | --- | --- | 1,04 | up   |
| 5850228 | 7099573 | 1126737 | --- | --- | --- | 1,07 | down |
| 5850282 | 7294264 | 1606860 | --- | --- | --- | 1,10 | up   |
| 5850320 | 7363765 | 1778591 | --- | --- | --- | 1,08 | up   |
| 5850453 | 7336250 | 1710171 | --- | --- | --- | 1,22 | down |
| 5850457 | 7363576 | 1778170 | --- | --- | --- | 1,01 | down |
| 5850641 | 7096842 | 1119235 | --- | --- | --- | 1,03 | down |
| 5850659 | 7340990 | 1722516 | --- | --- | --- | 1,28 | down |
| 5850756 | 7315206 | 1660025 | --- | --- | --- | 1,67 | down |
| 5850793 | 7059766 | 1030980 | --- | --- | --- | 1,07 | up   |
| 5850815 | 7339379 | 1718352 | --- | --- | --- | 1,08 | down |
| 5851015 | 7111427 | 1155764 | --- | --- | --- | 1,32 | down |
| 5851086 | 7154655 | 1262329 | --- | --- | --- | 1,13 | up   |
| 5851286 | 7249737 | 1496747 | --- | --- | --- | 1,30 | up   |
| 5851381 | 7192696 | 1357180 | --- | --- | --- | 1,02 | up   |
| 5851397 | 7143240 | 1234173 | --- | --- | --- | 2,21 | down |
| 5851413 | 7086966 | 1095275 | --- | --- | --- | 1,38 | down |
| 5851508 | 7092549 | 1109163 | --- | --- | --- | 1,46 | down |
| 5851520 | 7376820 | 1813452 | --- | --- | --- | 1,28 | up   |
| 5851595 | 7122486 | 1183425 | --- | --- | --- | 1,33 | up   |
| 5851671 | 7297589 | 1615669 | --- | --- | --- | 1,08 | up   |
| 5851815 | 7311218 | 1650357 | --- | --- | --- | 1,01 | up   |
| 5851881 | 7062529 | 1037855 | --- | --- | --- | 1,57 | down |
| 5851987 | 7152038 | 1255396 | --- | --- | --- | 1,08 | down |
| 5852058 | 7185622 | 1339216 | --- | --- | --- | 1,02 | up   |
| 5852118 | 7073928 | 1065799 | --- | --- | --- | 1,81 | down |
| 5852199 | 7129688 | 1200557 | --- | --- | --- | 1,43 | down |
| 5852217 | 7376566 | 1812885 | --- | --- | --- | 1,02 | down |
| 5852222 | 7254040 | 1507605 | --- | --- | --- | 1,02 | down |
| 5852291 | 7243363 | 1481603 | --- | --- | --- | 1,28 | down |
| 5852378 | 7150497 | 1251810 | --- | --- | --- | 1,26 | up   |
| 5852430 | 7095021 | 1115135 | --- | --- | --- | 1,36 | up   |
| 5852503 | 7243647 | 1482435 | --- | --- | --- | 1,35 | down |

|         |         |         |     |     |     |      |      |
|---------|---------|---------|-----|-----|-----|------|------|
| 5852634 | 7034293 | 971945  | --- | --- | --- | 1,28 | down |
| 5852640 | 7172373 | 1305566 | --- | --- | --- | 1,31 | down |
| 5852723 | 7053874 | 1018317 | --- | --- | --- | 1,05 | down |
| 5852739 | 7312903 | 1654097 | --- | --- | --- | 1,43 | down |
| 5852750 | 7181442 | 1328882 | --- | --- | --- | 1,62 | down |
| 5852764 | 7329846 | 1695003 | --- | --- | --- | 1,11 | up   |
| 5852839 | 7307721 | 1641989 | --- | --- | --- | 1,00 | down |
| 5853028 | 7222221 | 1428055 | --- | --- | --- | 1,08 | up   |
| 5853029 | 7146093 | 1240940 | --- | --- | --- | 1,15 | up   |
| 5853072 | 7249737 | 1496747 | --- | --- | --- | 1,36 | up   |
| 5853116 | 7240569 | 1475464 | --- | --- | --- | 1,21 | down |
| 5853282 | 7083030 | 1086271 | --- | --- | --- | 1,11 | up   |
| 5853390 | 7265989 | 1537100 | --- | --- | --- | 2,31 | down |
| 5853399 | 7131550 | 1205559 | --- | --- | --- | 1,17 | up   |
| 5853472 | 7297589 | 1615639 | --- | --- | --- | 1,06 | down |
| 5853491 | 7245921 | 1487677 | --- | --- | --- | 1,35 | down |
| 5853535 | 7190844 | 1352144 | --- | --- | --- | 1,02 | down |
| 5853618 | 7156052 | 1265758 | --- | --- | --- | 1,34 | down |
| 5853727 | 7034756 | 973228  | --- | --- | --- | 1,21 | up   |
| 5853733 | 7059584 | 1030549 | --- | --- | --- | 1,14 | down |
| 5853766 | 7103337 | 1135963 | --- | --- | --- | 1,07 | up   |
| 5853896 | 7159177 | 1273330 | --- | --- | --- | 1,09 | up   |
| 5853912 | 7279568 | 1572034 | --- | --- | --- | 1,13 | up   |
| 5854054 | 7213945 | 1407837 | --- | --- | --- | 1,32 | up   |
| 5854084 | 7115362 | 1165609 | --- | --- | --- | 1,19 | up   |
| 5854184 | 7097680 | 1121738 | --- | --- | --- | 1,22 | up   |
| 5854191 | 7352100 | 1750204 | --- | --- | --- | 1,31 | down |
| 5854287 | 7378997 | 1818673 | --- | --- | --- | 1,16 | up   |
| 5854314 | 7368613 | 1791618 | --- | --- | --- | 1,38 | up   |
| 5854333 | 7098411 | 1123703 | --- | --- | --- | 1,13 | up   |
| 5854359 | 7146245 | 1241377 | --- | --- | --- | 1,12 | down |
| 5854386 | 7235393 | 1461705 | --- | --- | --- | 4,53 | down |
| 5854399 | 7166439 | 1290103 | --- | --- | --- | 1,78 | down |
| 5854448 | 7368954 | 1792772 | --- | --- | --- | 1,08 | down |
| 5854461 | 7303616 | 1631386 | --- | --- | --- | 1,26 | up   |
| 5854574 | 7357815 | 1764129 | --- | --- | --- | 1,25 | down |
| 5854601 | 7214605 | 1409372 | --- | --- | --- | 1,19 | down |
| 5854699 | 7359426 | 1768376 | --- | --- | --- | 1,12 | down |
| 5854739 | 7315206 | 1660028 | --- | --- | --- | 1,15 | down |
| 5854807 | 7154584 | 1262120 | --- | --- | --- | 1,08 | down |
| 5854943 | 7385134 | 1831974 | --- | --- | --- | 1,27 | up   |
| 5855017 | 7291129 | 1599590 | --- | --- | --- | 2,44 | up   |
| 5855064 | 7364346 | 1779969 | --- | --- | --- | 1,00 | down |
| 5855158 | 7095262 | 1115646 | --- | --- | --- | 1,15 | up   |
| 5855193 | 7360486 | 1770952 | --- | --- | --- | 1,79 | down |
| 5855201 | 7180861 | 1327223 | --- | --- | --- | 1,21 | down |
| 5855212 | 7244288 | 1484094 | --- | --- | --- | 1,83 | up   |
| 5855442 | 7040260 | 986077  | --- | --- | --- | 1,16 | down |
| 5855485 | 7256191 | 1512869 | --- | --- | --- | 1,23 | down |
| 5855513 | 7043452 | 993835  | --- | --- | --- | 1,02 | down |
| 5855550 | 7230698 | 1449068 | --- | --- | --- | 1,36 | down |
| 5855562 | 7064468 | 1042379 | --- | --- | --- | 1,00 | up   |
| 5855668 | 7053874 | 1018334 | --- | --- | --- | 1,07 | down |
| 5855825 | 7273881 | 1557314 | --- | --- | --- | 1,24 | down |
| 5855867 | 7112225 | 1157537 | --- | --- | --- | 1,36 | up   |
| 5855882 | 7040260 | 986091  | --- | --- | --- | 1,18 | down |

|         |         |         |     |     |     |      |      |
|---------|---------|---------|-----|-----|-----|------|------|
| 5855945 | 7171041 | 1302330 | --- | --- | --- | 1,01 | up   |
| 5856259 | 7280743 | 1574529 | --- | --- | --- | 1,26 | down |
| 5856442 | 7064468 | 1042374 | --- | --- | --- | 1,05 | up   |
| 5856535 | 7236358 | 1464243 | --- | --- | --- | 1,09 | up   |
| 5856614 | 7331413 | 1699135 | --- | --- | --- | 1,23 | down |
| 5856674 | 7351951 | 1749818 | --- | --- | --- | 1,47 | down |
| 5856696 | 7059020 | 1029346 | --- | --- | --- | 1,10 | up   |
| 5856697 | 7233440 | 1456833 | --- | --- | --- | 1,19 | up   |
| 5856698 | 7274780 | 1559209 | --- | --- | --- | 1,05 | down |
| 5856834 | 7114108 | 1162443 | --- | --- | --- | 1,64 | up   |
| 5856941 | 7092549 | 1109185 | --- | --- | --- | 1,11 | up   |
| 5857012 | 7280743 | 1574518 | --- | --- | --- | 1,11 | up   |
| 5857236 | 7031576 | 964104  | --- | --- | --- | 1,19 | down |
| 5857286 | 7377583 | 1815454 | --- | --- | --- | 1,79 | down |
| 5857496 | 7231835 | 1452275 | --- | --- | --- | 1,02 | up   |
| 5857512 | 7119930 | 1177229 | --- | --- | --- | 1,07 | up   |
| 5857513 | 7186440 | 1341263 | --- | --- | --- | 1,02 | down |
| 5857575 | 7274780 | 1559252 | --- | --- | --- | 1,12 | up   |
| 5857610 | 7039463 | 984250  | --- | --- | --- | 1,31 | up   |
| 5857729 | 7303722 | 1631710 | --- | --- | --- | 1,15 | up   |
| 5857747 | 7361420 | 1773039 | --- | --- | --- | 1,29 | up   |
| 5857778 | 7243603 | 1482265 | --- | --- | --- | 1,07 | up   |
| 5857784 | 7363674 | 1778439 | --- | --- | --- | 1,05 | down |
| 5857843 | 7049399 | 1008368 | --- | --- | --- | 1,51 | down |
| 5857852 | 7312627 | 1653491 | --- | --- | --- | 1,10 | down |
| 5858044 | 7133612 | 1210273 | --- | --- | --- | 1,33 | up   |
| 5858081 | 7041061 | 988072  | --- | --- | --- | 2,70 | down |
| 5858156 | 7127540 | 1195270 | --- | --- | --- | 1,29 | down |
| 5858263 | 7217747 | 1417504 | --- | --- | --- | 1,06 | up   |
| 5858381 | 7384904 | 1831595 | --- | --- | --- | 1,04 | up   |
| 5858404 | 7242490 | 1479428 | --- | --- | --- | 1,06 | down |
| 5858436 | 7025652 | 950350  | --- | --- | --- | 1,40 | down |
| 5858514 | 7101400 | 1130907 | --- | --- | --- | 1,09 | up   |
| 5858561 | 7311218 | 1650344 | --- | --- | --- | 1,77 | up   |
| 5858650 | 7193056 | 1358263 | --- | --- | --- | 1,01 | up   |
| 5858700 | 7070140 | 1056531 | --- | --- | --- | 1,69 | up   |
| 5858738 | 7235521 | 1462150 | --- | --- | --- | 1,22 | down |
| 5859000 | 7117158 | 1169996 | --- | --- | --- | 1,36 | up   |
| 5859138 | 7095262 | 1115640 | --- | --- | --- | 1,08 | up   |
| 5859139 | 7210263 | 1399734 | --- | --- | --- | 1,15 | down |
| 5859250 | 7358048 | 1764791 | --- | --- | --- | 1,05 | up   |
| 5859252 | 7193056 | 1358289 | --- | --- | --- | 1,21 | up   |
| 5859327 | 7378997 | 1818688 | --- | --- | --- | 1,01 | down |
| 5859345 | 7247228 | 1490518 | --- | --- | --- | 1,26 | down |
| 5859393 | 7149817 | 1250308 | --- | --- | --- | 1,72 | up   |
| 5859454 | 7232029 | 1452766 | --- | --- | --- | 1,28 | up   |
| 5859459 | 7363765 | 1778585 | --- | --- | --- | 1,28 | up   |
| 5859505 | 7274780 | 1559200 | --- | --- | --- | 1,59 | up   |
| 5859507 | 7050780 | 1011386 | --- | --- | --- | 1,30 | down |
| 5859670 | 7369031 | 1793011 | --- | --- | --- | 1,77 | up   |
| 5859717 | 7033504 | 969858  | --- | --- | --- | 1,56 | down |
| 5859804 | 7119930 | 1177227 | --- | --- | --- | 1,33 | down |
| 5859871 | 7091954 | 1107709 | --- | --- | --- | 1,15 | up   |
| 5859890 | 7075424 | 1069282 | --- | --- | --- | 1,21 | up   |
| 5859915 | 7301879 | 1626622 | --- | --- | --- | 1,23 | down |
| 5860035 | 7040260 | 986094  | --- | --- | --- | 1,02 | down |

|         |         |         |     |     |     |      |      |
|---------|---------|---------|-----|-----|-----|------|------|
| 5860247 | 7258546 | 1519010 | --- | --- | --- | 1,15 | down |
| 5860485 | 7339387 | 1718379 | --- | --- | --- | 1,55 | up   |
| 5860639 | 7196803 | 1367328 | --- | --- | --- | 1,20 | down |
| 5860762 | 7056304 | 1023619 | --- | --- | --- | 1,47 | up   |
| 5860848 | 7229886 | 1447170 | --- | --- | --- | 1,61 | down |
| 5860864 | 7162177 | 1280575 | --- | --- | --- | 1,03 | down |
| 5860916 | 7059961 | 1031400 | --- | --- | --- | 1,45 | down |
| 5861040 | 7243130 | 1480908 | --- | --- | --- | 1,16 | up   |
| 5861077 | 7084993 | 1090670 | --- | --- | --- | 1,23 | up   |
| 5861241 | 7120690 | 1179042 | --- | --- | --- | 1,24 | down |
| 5861263 | 7119930 | 1177225 | --- | --- | --- | 1,02 | up   |
| 5861300 | 7336931 | 1711866 | --- | --- | --- | 1,30 | up   |
| 5861380 | 7174149 | 1310510 | --- | --- | --- | 1,00 | up   |
| 5861393 | 7039821 | 985073  | --- | --- | --- | 1,56 | down |
| 5861464 | 7311218 | 1650343 | --- | --- | --- | 1,42 | down |
| 5861467 | 7246866 | 1489791 | --- | --- | --- | 1,10 | down |
| 5861507 | 7337224 | 1712609 | --- | --- | --- | 2,17 | down |
| 5861530 | 7279568 | 1572026 | --- | --- | --- | 1,10 | down |
| 5861570 | 7181086 | 1327928 | --- | --- | --- | 1,92 | down |
| 5861593 | 7231835 | 1452288 | --- | --- | --- | 1,21 | up   |
| 5861693 | 7053878 | 1018359 | --- | --- | --- | 1,04 | down |
| 5861802 | 7217650 | 1417175 | --- | --- | --- | 1,38 | down |
| 5861927 | 7267802 | 1541816 | --- | --- | --- | 1,23 | down |
| 5861988 | 7364948 | 1781217 | --- | --- | --- | 1,22 | down |
| 5862177 | 7290288 | 1597341 | --- | --- | --- | 1,04 | up   |
| 5862202 | 7340258 | 1720743 | --- | --- | --- | 1,07 | down |
| 5862252 | 7297589 | 1615657 | --- | --- | --- | 1,07 | down |
| 5862279 | 7238202 | 1468947 | --- | --- | --- | 1,10 | up   |
| 5862385 | 7337224 | 1712619 | --- | --- | --- | 1,73 | down |
| 5862405 | 7087282 | 1096160 | --- | --- | --- | 1,33 | up   |
| 5862437 | 7092965 | 1110194 | --- | --- | --- | 1,16 | up   |
| 5862487 | 7052567 | 1015256 | --- | --- | --- | 1,24 | down |
| 5862516 | 7063873 | 1040651 | --- | --- | --- | 1,56 | down |
| 5862536 | 7040260 | 986074  | --- | --- | --- | 1,13 | up   |
| 5862586 | 7303616 | 1631389 | --- | --- | --- | 1,14 | down |
| 5862624 | 7338807 | 1716782 | --- | --- | --- | 1,22 | up   |
| 5862747 | 7271008 | 1549958 | --- | --- | --- | 1,19 | up   |
| 5862991 | 7042382 | 991289  | --- | --- | --- | 1,03 | up   |
| 5863086 | 7259923 | 1522521 | --- | --- | --- | 1,28 | up   |
| 5863167 | 7120827 | 1179353 | --- | --- | --- | 1,56 | up   |
| 5863229 | 7095021 | 1115131 | --- | --- | --- | 1,52 | down |
| 5863259 | 7196029 | 1365626 | --- | --- | --- | 1,94 | down |
| 5863267 | 7050930 | 1011617 | --- | --- | --- | 1,33 | down |
| 5863305 | 7350237 | 1745477 | --- | --- | --- | 1,23 | up   |
| 5863323 | 7092965 | 1110162 | --- | --- | --- | 1,19 | up   |
| 5863327 | 7193056 | 1358268 | --- | --- | --- | 1,15 | down |
| 5863397 | 7274780 | 1559231 | --- | --- | --- | 1,04 | up   |
| 5863439 | 7330737 | 1697217 | --- | --- | --- | 1,46 | up   |
| 5863535 | 7037235 | 978584  | --- | --- | --- | 1,03 | up   |
| 5863585 | 7320337 | 1673325 | --- | --- | --- | 1,01 | down |
| 5863658 | 7281507 | 1576680 | --- | --- | --- | 1,22 | down |
| 5863692 | 7384509 | 1830759 | --- | --- | --- | 1,13 | down |
| 5863770 | 7196029 | 1365628 | --- | --- | --- | 1,00 | down |
| 5863803 | 7071969 | 1060901 | --- | --- | --- | 1,18 | down |
| 5863810 | 7373417 | 1805108 | --- | --- | --- | 1,29 | up   |
| 5863816 | 7097680 | 1121746 | --- | --- | --- | 1,13 | up   |

|         |         |         |     |     |     |      |      |
|---------|---------|---------|-----|-----|-----|------|------|
| 5863839 | 7332970 | 1702533 | --- | --- | --- | 1,19 | down |
| 5864034 | 7217747 | 1417497 | --- | --- | --- | 1,30 | up   |
| 5864095 | 7176409 | 1315673 | --- | --- | --- | 1,88 | up   |
| 5864119 | 7078666 | 1076516 | --- | --- | --- | 1,66 | down |
| 5864145 | 7320337 | 1673337 | --- | --- | --- | 1,12 | down |
| 5864252 | 7222221 | 1428084 | --- | --- | --- | 1,06 | down |
| 5864292 | 7344406 | 1731197 | --- | --- | --- | 2,00 | up   |
| 5864296 | 7040260 | 986095  | --- | --- | --- | 1,07 | down |
| 5864367 | 7297589 | 1615666 | --- | --- | --- | 1,03 | down |
| 5864385 | 7181105 | 1327962 | --- | --- | --- | 1,08 | down |
| 5864535 | 7233012 | 1455403 | --- | --- | --- | 1,13 | up   |
| 5864551 | 7146982 | 1243292 | --- | --- | --- | 1,34 | down |
| 5864582 | 7061003 | 1033923 | --- | --- | --- | 1,20 | up   |
| 5864602 | 7239939 | 1473797 | --- | --- | --- | 1,01 | up   |
| 5864650 | 7111573 | 1156032 | --- | --- | --- | 1,15 | up   |
| 5864707 | 7243647 | 1482463 | --- | --- | --- | 1,09 | up   |
| 5864757 | 7371643 | 1800649 | --- | --- | --- | 1,22 | up   |
| 5864973 | 7200545 | 1376917 | --- | --- | --- | 1,11 | up   |
| 5865000 | 7112225 | 1157614 | --- | --- | --- | 1,09 | up   |
| 5865014 | 7111573 | 1156029 | --- | --- | --- | 1,03 | up   |
| 5865024 | 7102113 | 1132824 | --- | --- | --- | 1,09 | down |
| 5865115 | 7263248 | 1530602 | --- | --- | --- | 1,64 | down |
| 5865127 | 7068942 | 1053386 | --- | --- | --- | 1,23 | down |
| 5865174 | 7121866 | 1181878 | --- | --- | --- | 1,45 | down |
| 5865200 | 7339286 | 1718108 | --- | --- | --- | 1,08 | down |
| 5865246 | 7360486 | 1770954 | --- | --- | --- | 1,01 | down |
| 5865388 | 7247848 | 1492047 | --- | --- | --- | 1,49 | down |
| 5865508 | 7330238 | 1695939 | --- | --- | --- | 1,02 | down |
| 5865527 | 7293454 | 1604951 | --- | --- | --- | 1,12 | up   |
| 5865721 | 7053878 | 1018361 | --- | --- | --- | 1,64 | down |
| 5865751 | 7181442 | 1328882 | --- | --- | --- | 1,26 | down |
| 5865909 | 7068259 | 1051652 | --- | --- | --- | 1,13 | up   |
| 5865912 | 7168858 | 1296827 | --- | --- | --- | 1,09 | down |
| 5865932 | 7068259 | 1051637 | --- | --- | --- | 1,10 | down |
| 5865957 | 7321465 | 1675747 | --- | --- | --- | 1,59 | up   |
| 5866038 | 7097454 | 1120880 | --- | --- | --- | 1,24 | down |
| 5866081 | 7056333 | 1023709 | --- | --- | --- | 1,81 | down |
| 5866160 | 7049399 | 1008333 | --- | --- | --- | 1,49 | down |
| 5866171 | 7295410 | 1609782 | --- | --- | --- | 1,06 | down |
| 5866271 | 7075096 | 1068578 | --- | --- | --- | 1,29 | down |
| 5866272 | 7170764 | 1301490 | --- | --- | --- | 1,25 | up   |
| 5866314 | 7123421 | 1185833 | --- | --- | --- | 2,67 | down |
| 5866343 | 7336931 | 1711872 | --- | --- | --- | 1,41 | down |
| 5866368 | 7075445 | 1069339 | --- | --- | --- | 1,44 | down |
| 5866410 | 7043535 | 994109  | --- | --- | --- | 1,03 | up   |
| 5866436 | 7031576 | 964108  | --- | --- | --- | 2,11 | down |
| 5866458 | 7358859 | 1767009 | --- | --- | --- | 1,21 | up   |
| 5866518 | 7280743 | 1574500 | --- | --- | --- | 1,26 | up   |
| 5866552 | 7237438 | 1466787 | --- | --- | --- | 1,40 | down |
| 5866607 | 7050167 | 1009800 | --- | --- | --- | 1,01 | up   |
| 5866615 | 7244288 | 1484094 | --- | --- | --- | 1,19 | down |
| 5866643 | 7368006 | 1789352 | --- | --- | --- | 1,24 | down |
| 5866700 | 7098077 | 1122727 | --- | --- | --- | 2,02 | up   |
| 5866715 | 7161992 | 1280158 | --- | --- | --- | 1,02 | down |
| 5866885 | 7276231 | 1563100 | --- | --- | --- | 1,76 | down |
| 5866927 | 7068504 | 1052167 | --- | --- | --- | 1,10 | down |

|         |         |         |     |     |     |      |      |
|---------|---------|---------|-----|-----|-----|------|------|
| 5866993 | 7060851 | 1033441 | --- | --- | --- | 1,27 | up   |
| 5867103 | 7233359 | 1456510 | --- | --- | --- | 1,24 | down |
| 5867201 | 7240569 | 1475329 | --- | --- | --- | 1,03 | up   |
| 5867386 | 7088489 | 1099521 | --- | --- | --- | 1,03 | up   |
| 5867550 | 7174149 | 1310500 | --- | --- | --- | 1,55 | down |
| 5867623 | 7174114 | 1310431 | --- | --- | --- | 1,14 | up   |
| 5867755 | 7319937 | 1672276 | --- | --- | --- | 1,18 | up   |
| 5867756 | 7233012 | 1455410 | --- | --- | --- | 1,67 | up   |
| 5867761 | 7131103 | 1204357 | --- | --- | --- | 1,09 | down |
| 5867792 | 7069253 | 1054160 | --- | --- | --- | 1,35 | up   |
| 5867845 | 7248790 | 1494499 | --- | --- | --- | 1,63 | up   |
| 5867877 | 7279568 | 1572035 | --- | --- | --- | 1,06 | down |
| 5867910 | 7269637 | 1546234 | --- | --- | --- | 2,62 | down |
| 5867935 | 7217679 | 1417295 | --- | --- | --- | 1,31 | up   |
| 5868048 | 7233359 | 1456506 | --- | --- | --- | 1,04 | up   |
| 5868110 | 7348487 | 1741251 | --- | --- | --- | 1,23 | up   |
| 5868140 | 7280743 | 1574487 | --- | --- | --- | 1,36 | up   |
| 5868204 | 7127691 | 1195636 | --- | --- | --- | 1,02 | up   |
| 5868249 | 7072765 | 1062744 | --- | --- | --- | 1,71 | down |
| 5868328 | 7351951 | 1749846 | --- | --- | --- | 1,14 | down |
| 5868698 | 7373678 | 1805852 | --- | --- | --- | 1,44 | down |
| 5868746 | 7065265 | 1044558 | --- | --- | --- | 1,55 | up   |
| 5868876 | 7132125 | 1206641 | --- | --- | --- | 1,19 | down |
| 5868931 | 7199476 | 1374544 | --- | --- | --- | 1,21 | down |
| 5868951 | 7360213 | 1770141 | --- | --- | --- | 1,16 | down |
| 5869053 | 7136977 | 1218819 | --- | --- | --- | 1,01 | down |
| 5869055 | 7097680 | 1121746 | --- | --- | --- | 1,13 | up   |
| 5869199 | 7256191 | 1512860 | --- | --- | --- | 1,07 | down |
| 5869215 | 7165954 | 1288767 | --- | --- | --- | 1,06 | down |
| 5869270 | 7273251 | 1555943 | --- | --- | --- | 1,34 | down |
| 5869348 | 7236254 | 1464057 | --- | --- | --- | 1,07 | up   |
| 5869428 | 7059375 | 1030080 | --- | --- | --- | 1,71 | up   |
| 5869438 | 7115146 | 1164933 | --- | --- | --- | 2,27 | down |
| 5869581 | 7143455 | 1234734 | --- | --- | --- | 1,39 | up   |
| 5869587 | 7329135 | 1693488 | --- | --- | --- | 1,13 | down |
| 5869618 | 7065655 | 1045257 | --- | --- | --- | 1,15 | up   |
| 5869631 | 7378997 | 1818647 | --- | --- | --- | 1,11 | up   |
| 5869632 | 7234195 | 1458980 | --- | --- | --- | 1,45 | down |
| 5869644 | 7098126 | 1122980 | --- | --- | --- | 1,01 | down |
| 5869676 | 7231835 | 1452294 | --- | --- | --- | 1,35 | up   |
| 5869719 | 7199476 | 1374526 | --- | --- | --- | 1,62 | down |
| 5869742 | 7069253 | 1054167 | --- | --- | --- | 1,19 | up   |
| 5869758 | 7181442 | 1328884 | --- | --- | --- | 1,20 | up   |
| 5869837 | 7197056 | 1367834 | --- | --- | --- | 1,14 | down |
| 5870139 | 7279303 | 1571212 | --- | --- | --- | 1,08 | up   |
| 5870505 | 7039223 | 983558  | --- | --- | --- | 1,67 | up   |
| 5870513 | 7201217 | 1378763 | --- | --- | --- | 1,08 | down |
| 5870514 | 7082098 | 1084108 | --- | --- | --- | 1,09 | down |
| 5870561 | 7186464 | 1341366 | --- | --- | --- | 1,13 | up   |
| 5870702 | 7191594 | 1354233 | --- | --- | --- | 1,31 | up   |
| 5870707 | 7029985 | 960592  | --- | --- | --- | 1,36 | down |
| 5870781 | 7336931 | 1711867 | --- | --- | --- | 1,12 | down |
| 5871095 | 7293049 | 1603882 | --- | --- | --- | 1,01 | down |
| 5871155 | 7384365 | 1830285 | --- | --- | --- | 1,11 | up   |
| 5871159 | 7292100 | 1601540 | --- | --- | --- | 2,12 | up   |
| 5871289 | 7207069 | 1392034 | --- | --- | --- | 1,53 | down |

|         |         |         |     |     |     |      |      |
|---------|---------|---------|-----|-----|-----|------|------|
| 5871397 | 7099573 | 1126730 | --- | --- | --- | 1,41 | up   |
| 5871458 | 7254088 | 1507737 | --- | --- | --- | 1,33 | up   |
| 5871505 | 7341002 | 1722533 | --- | --- | --- | 1,32 | up   |
| 5871552 | 7320337 | 1673333 | --- | --- | --- | 1,12 | down |
| 5871612 | 7236358 | 1464248 | --- | --- | --- | 1,57 | down |
| 5871693 | 7075445 | 1069352 | --- | --- | --- | 1,04 | up   |
| 5871699 | 7233425 | 1456778 | --- | --- | --- | 1,21 | down |
| 5871730 | 7320234 | 1672995 | --- | --- | --- | 2,11 | up   |
| 5871779 | 7071264 | 1059296 | --- | --- | --- | 2,00 | up   |
| 5871805 | 7279555 | 1571952 | --- | --- | --- | 1,05 | up   |
| 5871913 | 7358859 | 1766999 | --- | --- | --- | 1,23 | down |
| 5872023 | 7136062 | 1216304 | --- | --- | --- | 1,20 | up   |
| 5872089 | 7233440 | 1456933 | --- | --- | --- | 1,09 | down |
| 5872230 | 7308679 | 1644244 | --- | --- | --- | 1,34 | up   |
| 5872317 | 7062173 | 1037024 | --- | --- | --- | 1,31 | down |
| 5872395 | 7153571 | 1259039 | --- | --- | --- | 1,33 | down |
| 5872487 | 7303616 | 1631364 | --- | --- | --- | 1,02 | down |
| 5872541 | 7340057 | 1720333 | --- | --- | --- | 1,07 | up   |
| 5872595 | 7068259 | 1051622 | --- | --- | --- | 1,18 | down |
| 5872627 | 7303616 | 1631357 | --- | --- | --- | 1,07 | up   |
| 5872723 | 7274585 | 1558789 | --- | --- | --- | 1,14 | down |
| 5872736 | 7374790 | 1808765 | --- | --- | --- | 1,79 | up   |
| 5872777 | 7031774 | 964651  | --- | --- | --- | 1,13 | down |
| 5872808 | 7198210 | 1370982 | --- | --- | --- | 1,55 | up   |
| 5872850 | 7068259 | 1051619 | --- | --- | --- | 1,20 | up   |
| 5872991 | 7367959 | 1789071 | --- | --- | --- | 1,23 | up   |
| 5873139 | 7200996 | 1378158 | --- | --- | --- | 1,08 | down |
| 5873198 | 7112225 | 1157587 | --- | --- | --- | 1,14 | up   |
| 5873209 | 7248790 | 1494514 | --- | --- | --- | 1,26 | down |
| 5873289 | 7082832 | 1085759 | --- | --- | --- | 1,11 | up   |
| 5873300 | 7084993 | 1090668 | --- | --- | --- | 2,50 | down |
| 5873411 | 7146982 | 1243284 | --- | --- | --- | 1,07 | up   |
| 5873455 | 7132834 | 1208326 | --- | --- | --- | 1,03 | up   |
| 5873767 | 7235069 | 1460988 | --- | --- | --- | 1,14 | down |
| 5873860 | 7338807 | 1716806 | --- | --- | --- | 1,09 | down |
| 5873956 | 7082098 | 1084124 | --- | --- | --- | 1,05 | up   |
| 5874005 | 7303616 | 1631308 | --- | --- | --- | 1,12 | up   |
| 5874012 | 7209927 | 1398916 | --- | --- | --- | 1,19 | down |
| 5874046 | 7037764 | 980107  | --- | --- | --- | 1,08 | up   |
| 5874098 | 7341397 | 1723648 | --- | --- | --- | 1,27 | up   |
| 5874151 | 7097680 | 1121746 | --- | --- | --- | 1,77 | up   |
| 5874180 | 7225553 | 1435991 | --- | --- | --- | 1,25 | down |
| 5874255 | 7243603 | 1482271 | --- | --- | --- | 1,31 | down |
| 5874265 | 7113483 | 1160998 | --- | --- | --- | 1,76 | down |
| 5874317 | 7146093 | 1240986 | --- | --- | --- | 1,35 | up   |
| 5874401 | 7240569 | 1475510 | --- | --- | --- | 1,14 | up   |
| 5874467 | 7340304 | 1720865 | --- | --- | --- | 1,08 | down |
| 5874527 | 7230886 | 1449569 | --- | --- | --- | 1,02 | down |
| 5874777 | 7193056 | 1358257 | --- | --- | --- | 1,11 | down |
| 5874867 | 7032395 | 966595  | --- | --- | --- | 1,05 | down |
| 5874894 | 7027795 | 956272  | --- | --- | --- | 1,04 | up   |
| 5874945 | 7337224 | 1712624 | --- | --- | --- | 2,57 | up   |
| 5875016 | 7112225 | 1157575 | --- | --- | --- | 1,10 | up   |
| 5875035 | 7062436 | 1037675 | --- | --- | --- | 1,59 | down |
| 5875280 | 7233425 | 1456756 | --- | --- | --- | 1,14 | down |
| 5875338 | 7376206 | 1811973 | --- | --- | --- | 1,19 | up   |



|         |         |         |     |     |     |      |      |
|---------|---------|---------|-----|-----|-----|------|------|
| 5875343 | 7070836 | 1058361 | --- | --- | --- | 1,48 | down |
| 5875480 | 7059584 | 1030552 | --- | --- | --- | 1,11 | down |
| 5875505 | 7342959 | 1727333 | --- | --- | --- | 1,00 | up   |
| 5875564 | 7033451 | 969772  | --- | --- | --- | 1,16 | down |
| 5875697 | 7071616 | 1060071 | --- | --- | --- | 1,90 | up   |
| 5875703 | 7248790 | 1494550 | --- | --- | --- | 1,05 | up   |
| 5875729 | 7156052 | 1265777 | --- | --- | --- | 1,23 | up   |
| 5875730 | 7092549 | 1109183 | --- | --- | --- | 1,05 | up   |
| 5875757 | 7040260 | 986051  | --- | --- | --- | 1,14 | down |
| 5875773 | 7376566 | 1812857 | --- | --- | --- | 2,27 | down |
| 5875776 | 7340838 | 1722079 | --- | --- | --- | 1,17 | down |
| 5875812 | 7112225 | 1157560 | --- | --- | --- | 2,09 | down |
| 5875827 | 7273251 | 1555948 | --- | --- | --- | 1,66 | up   |
| 5875896 | 7052385 | 1014800 | --- | --- | --- | 1,26 | up   |
| 5875913 | 7289069 | 1594393 | --- | --- | --- | 1,36 | up   |
| 5875914 | 7230886 | 1449524 | --- | --- | --- | 1,30 | up   |
| 5875951 | 7239752 | 1473157 | --- | --- | --- | 1,22 | up   |
| 5875971 | 7342959 | 1727333 | --- | --- | --- | 1,25 | up   |
| 5876161 | 7198644 | 1372353 | --- | --- | --- | 1,06 | up   |
| 5876170 | 7373678 | 1805855 | --- | --- | --- | 1,03 | up   |
| 5876213 | 7369822 | 1795130 | --- | --- | --- | 1,01 | up   |
| 5876248 | 7193056 | 1358274 | --- | --- | --- | 1,36 | down |
| 5876303 | 7297589 | 1615636 | --- | --- | --- | 1,05 | up   |
| 5876415 | 7286807 | 1588846 | --- | --- | --- | 1,04 | down |
| 5876444 | 7197056 | 1367848 | --- | --- | --- | 1,16 | down |
| 5876501 | 7383655 | 1828573 | --- | --- | --- | 1,06 | down |
| 5876558 | 7050780 | 1011377 | --- | --- | --- | 1,02 | down |
| 5876643 | 7358048 | 1764797 | --- | --- | --- | 1,08 | down |
| 5876677 | 7194172 | 1361162 | --- | --- | --- | 1,02 | up   |
| 5876706 | 7042382 | 991286  | --- | --- | --- | 1,27 | up   |
| 5876769 | 7039463 | 984252  | --- | --- | --- | 1,51 | down |
| 5876779 | 7086664 | 1094287 | --- | --- | --- | 1,96 | down |
| 5876794 | 7202550 | 1381613 | --- | --- | --- | 1,39 | up   |
| 5876836 | 7298920 | 1618828 | --- | --- | --- | 1,71 | up   |
| 5877146 | 7228848 | 1444755 | --- | --- | --- | 1,14 | down |
| 5877162 | 7341002 | 1722535 | --- | --- | --- | 1,04 | up   |
| 5877170 | 7369712 | 1794829 | --- | --- | --- | 1,03 | up   |
| 5877263 | 7032083 | 965682  | --- | --- | --- | 1,24 | up   |
| 5877336 | 7049399 | 1008356 | --- | --- | --- | 1,21 | up   |
| 5877504 | 7065265 | 1044568 | --- | --- | --- | 1,28 | down |
| 5877545 | 7337260 | 1712798 | --- | --- | --- | 1,47 | up   |
| 5877596 | 7329135 | 1693495 | --- | --- | --- | 1,22 | down |
| 5877716 | 7058713 | 1028663 | --- | --- | --- | 1,09 | down |
| 5877768 | 7341546 | 1723943 | --- | --- | --- | 1,24 | down |
| 5877771 | 7330396 | 1696360 | --- | --- | --- | 1,46 | up   |
| 5877850 | 7162144 | 1280502 | --- | --- | --- | 1,13 | up   |
| 5877909 | 7206133 | 1389963 | --- | --- | --- | 1,02 | up   |
| 5878046 | 7069830 | 1055667 | --- | --- | --- | 1,72 | down |
| 5878080 | 7243628 | 1482384 | --- | --- | --- | 1,22 | down |
| 5878141 | 7239752 | 1473179 | --- | --- | --- | 1,29 | down |
| 5878217 | 7170764 | 1301489 | --- | --- | --- | 1,76 | up   |
| 5878291 | 7234040 | 1458505 | --- | --- | --- | 1,43 | up   |
| 5878342 | 7319144 | 1670100 | --- | --- | --- | 1,68 | down |
| 5878352 | 7217679 | 1417308 | --- | --- | --- | 1,54 | up   |
| 5878357 | 7169599 | 1298444 | --- | --- | --- | 1,25 | down |
| 5878423 | 7290942 | 1599135 | --- | --- | --- | 1,96 | down |

|         |         |         |     |     |     |      |      |
|---------|---------|---------|-----|-----|-----|------|------|
| 5878476 | 7069830 | 1055638 | --- | --- | --- | 1,27 | down |
| 5878578 | 7301890 | 1626687 | --- | --- | --- | 1,01 | down |
| 5878628 | 7235323 | 1461554 | --- | --- | --- | 1,06 | up   |
| 5878704 | 7095956 | 1117040 | --- | --- | --- | 1,16 | up   |
| 5878735 | 7149008 | 1248598 | --- | --- | --- | 1,04 | down |
| 5878787 | 7096859 | 1119325 | --- | --- | --- | 1,26 | down |
| 5878840 | 7237719 | 1467478 | --- | --- | --- | 1,02 | down |
| 5879105 | 7073854 | 1065625 | --- | --- | --- | 1,14 | up   |
| 5879145 | 7287337 | 1589968 | --- | --- | --- | 2,25 | down |
| 5879246 | 7127540 | 1195279 | --- | --- | --- | 1,02 | down |
| 5879328 | 7333462 | 1703646 | --- | --- | --- | 1,03 | up   |
| 5879420 | 7357890 | 1764383 | --- | --- | --- | 1,11 | down |
| 5879562 | 7378981 | 1818552 | --- | --- | --- | 2,19 | down |
| 5879584 | 7243098 | 1480754 | --- | --- | --- | 2,13 | down |
| 5879624 | 7172373 | 1305577 | --- | --- | --- | 1,11 | down |
| 5879682 | 7069253 | 1054175 | --- | --- | --- | 1,09 | up   |
| 5879701 | 7247848 | 1492047 | --- | --- | --- | 1,25 | down |
| 5879850 | 7243647 | 1482438 | --- | --- | --- | 1,10 | up   |
| 5879942 | 7351951 | 1749847 | --- | --- | --- | 1,23 | down |
| 5880061 | 7156052 | 1265776 | --- | --- | --- | 1,37 | down |
| 5880248 | 7287222 | 1589717 | --- | --- | --- | 1,24 | down |
| 5880368 | 7141061 | 1228644 | --- | --- | --- | 1,91 | up   |
| 5880528 | 7319937 | 1672297 | --- | --- | --- | 1,35 | up   |
| 5880629 | 7139708 | 1225051 | --- | --- | --- | 1,09 | up   |
| 5880783 | 7037235 | 978573  | --- | --- | --- | 1,13 | up   |
| 5880863 | 7059766 | 1030971 | --- | --- | --- | 1,81 | up   |
| 5880905 | 7350489 | 1746121 | --- | --- | --- | 1,03 | up   |
| 5880938 | 7112225 | 1157578 | --- | --- | --- | 1,00 | up   |
| 5880982 | 7378997 | 1818661 | --- | --- | --- | 1,02 | down |
| 5881103 | 7291054 | 1599401 | --- | --- | --- | 1,01 | up   |
| 5881114 | 7379957 | 1820639 | --- | --- | --- | 1,38 | up   |
| 5881175 | 7137646 | 1220437 | --- | --- | --- | 1,15 | down |
| 5881177 | 7267380 | 1540390 | --- | --- | --- | 1,10 | down |
| 5881325 | 7171525 | 1303467 | --- | --- | --- | 1,01 | down |
| 5881452 | 7117158 | 1170034 | --- | --- | --- | 1,06 | down |
| 5881557 | 7180732 | 1326723 | --- | --- | --- | 1,66 | down |
| 5881812 | 7101564 | 1131391 | --- | --- | --- | 1,30 | down |
| 5881819 | 7277783 | 1567437 | --- | --- | --- | 4,92 | up   |
| 5881835 | 7180243 | 1325517 | --- | --- | --- | 1,07 | up   |
| 5881844 | 7345465 | 1733851 | --- | --- | --- | 1,44 | down |
| 5881930 | 7331434 | 1699215 | --- | --- | --- | 1,92 | down |
| 5881945 | 7181016 | 1327778 | --- | --- | --- | 1,38 | up   |
| 5881974 | 7344530 | 1731569 | --- | --- | --- | 2,22 | up   |
| 5881983 | 7297523 | 1615426 | --- | --- | --- | 1,37 | up   |
| 5881985 | 7240569 | 1475505 | --- | --- | --- | 1,11 | down |
| 5882003 | 7092549 | 1109195 | --- | --- | --- | 1,45 | up   |
| 5882102 | 7174114 | 1310422 | --- | --- | --- | 1,17 | down |
| 5882211 | 7349882 | 1744784 | --- | --- | --- | 1,05 | up   |
| 5882219 | 7289856 | 1596347 | --- | --- | --- | 1,10 | up   |
| 5882240 | 7113483 | 1161004 | --- | --- | --- | 1,12 | up   |
| 5882268 | 7102113 | 1132839 | --- | --- | --- | 1,14 | up   |
| 5882543 | 7245066 | 1485574 | --- | --- | --- | 1,03 | down |
| 5882616 | 7274892 | 1559540 | --- | --- | --- | 1,60 | up   |
| 5882763 | 7244290 | 1484157 | --- | --- | --- | 1,44 | up   |
| 5882888 | 7293646 | 1605411 | --- | --- | --- | 1,02 | down |
| 5882895 | 7222221 | 1428075 | --- | --- | --- | 1,05 | up   |

|         |         |         |     |     |     |      |      |
|---------|---------|---------|-----|-----|-----|------|------|
| 5882948 | 7341397 | 1723621 | --- | --- | --- | 1,13 | down |
| 5883102 | 7297589 | 1615607 | --- | --- | --- | 1,10 | up   |
| 5883262 | 7215722 | 1412267 | --- | --- | --- | 2,08 | down |
| 5883275 | 7258520 | 1518888 | --- | --- | --- | 1,33 | down |
| 5883293 | 7098867 | 1124962 | --- | --- | --- | 1,10 | down |
| 5883309 | 7076160 | 1070909 | --- | --- | --- | 1,09 | down |
| 5883348 | 7361223 | 1772619 | --- | --- | --- | 1,18 | down |
| 5883388 | 7243130 | 1480883 | --- | --- | --- | 1,44 | up   |
| 5883426 | 7059020 | 1029334 | --- | --- | --- | 1,03 | down |
| 5883536 | 7176235 | 1315241 | --- | --- | --- | 1,34 | down |
| 5883538 | 7088164 | 1098489 | --- | --- | --- | 1,50 | down |
| 5883569 | 7179785 | 1324460 | --- | --- | --- | 1,45 | down |
| 5883678 | 7083030 | 1086270 | --- | --- | --- | 1,07 | down |
| 5883732 | 7361042 | 1772273 | --- | --- | --- | 1,12 | down |
| 5883767 | 7168858 | 1296831 | --- | --- | --- | 1,24 | up   |
| 5883804 | 7246570 | 1489225 | --- | --- | --- | 1,05 | up   |
| 5884035 | 7065265 | 1044570 | --- | --- | --- | 1,01 | down |
| 5884115 | 7248790 | 1494490 | --- | --- | --- | 1,13 | up   |
| 5884124 | 7070836 | 1058350 | --- | --- | --- | 1,39 | up   |
| 5884346 | 7294151 | 1606607 | --- | --- | --- | 1,31 | up   |
| 5884429 | 7271128 | 1550318 | --- | --- | --- | 1,19 | down |
| 5884573 | 7213908 | 1407669 | --- | --- | --- | 1,17 | down |
| 5884626 | 7341253 | 1723264 | --- | --- | --- | 1,01 | up   |
| 5884691 | 7374143 | 1807009 | --- | --- | --- | 1,44 | up   |
| 5884716 | 7361420 | 1773036 | --- | --- | --- | 1,03 | up   |
| 5884723 | 7354688 | 1756375 | --- | --- | --- | 1,35 | up   |
| 5884746 | 7070836 | 1058344 | --- | --- | --- | 1,44 | up   |
| 5884811 | 7143971 | 1235934 | --- | --- | --- | 3,03 | up   |
| 5884931 | 7115362 | 1165599 | --- | --- | --- | 1,39 | down |
| 5885111 | 7155624 | 1264726 | --- | --- | --- | 1,36 | up   |
| 5885294 | 7149817 | 1250314 | --- | --- | --- | 1,44 | up   |
| 5885298 | 7180861 | 1327218 | --- | --- | --- | 1,18 | up   |
| 5885425 | 7130889 | 1203883 | --- | --- | --- | 1,01 | down |
| 5885474 | 7330078 | 1695460 | --- | --- | --- | 1,48 | down |
| 5885496 | 7027795 | 956272  | --- | --- | --- | 1,06 | down |
| 5885500 | 7343052 | 1727528 | --- | --- | --- | 1,51 | up   |
| 5885783 | 7043379 | 993646  | --- | --- | --- | 1,07 | down |
| 5885937 | 7087282 | 1096231 | --- | --- | --- | 1,16 | down |
| 5885940 | 7067828 | 1050784 | --- | --- | --- | 1,05 | up   |
| 5886070 | 7049399 | 1008373 | --- | --- | --- | 1,04 | up   |
| 5886299 | 7202550 | 1381607 | --- | --- | --- | 1,24 | down |
| 5886300 | 7351951 | 1749828 | --- | --- | --- | 1,03 | down |
| 5886354 | 7352044 | 1750001 | --- | --- | --- | 1,25 | up   |
| 5886412 | 7068504 | 1052167 | --- | --- | --- | 1,20 | down |
| 5886468 | 7286807 | 1588812 | --- | --- | --- | 1,02 | up   |
| 5886505 | 7243130 | 1480826 | --- | --- | --- | 1,02 | up   |
| 5886517 | 7111244 | 1155384 | --- | --- | --- | 1,16 | up   |
| 5886640 | 7071264 | 1059285 | --- | --- | --- | 1,06 | down |
| 5886775 | 7034293 | 971971  | --- | --- | --- | 1,17 | up   |
| 5886847 | 7329135 | 1693493 | --- | --- | --- | 1,52 | up   |
| 5886884 | 7196029 | 1365620 | --- | --- | --- | 1,00 | down |
| 5886909 | 7168858 | 1296824 | --- | --- | --- | 1,12 | up   |
| 5886935 | 7297589 | 1615601 | --- | --- | --- | 1,09 | up   |
| 5887047 | 7148978 | 1248535 | --- | --- | --- | 1,07 | up   |
| 5887063 | 7367969 | 1789101 | --- | --- | --- | 1,69 | down |
| 5887077 | 7243653 | 1482526 | --- | --- | --- | 1,12 | up   |

|         |         |         |     |     |     |      |      |
|---------|---------|---------|-----|-----|-----|------|------|
| 5887081 | 7344406 | 1731212 | --- | --- | --- | 1,61 | down |
| 5887127 | 7331434 | 1699197 | --- | --- | --- | 1,10 | down |
| 5887132 | 7047865 | 1005354 | --- | --- | --- | 1,30 | up   |
| 5887273 | 7092549 | 1109197 | --- | --- | --- | 1,15 | up   |
| 5887422 | 7117187 | 1170113 | --- | --- | --- | 1,08 | down |
| 5887440 | 7038316 | 981460  | --- | --- | --- | 1,40 | up   |
| 5887782 | 7056333 | 1023684 | --- | --- | --- | 1,09 | down |
| 5887822 | 7241136 | 1476725 | --- | --- | --- | 1,68 | down |
| 5887840 | 7316644 | 1664011 | --- | --- | --- | 1,03 | up   |
| 5887843 | 7334347 | 1705755 | --- | --- | --- | 1,15 | down |
| 5887913 | 7240569 | 1475364 | --- | --- | --- | 1,23 | up   |
| 5887940 | 7216132 | 1413398 | --- | --- | --- | 1,29 | up   |
| 5887967 | 7050780 | 1011382 | --- | --- | --- | 1,33 | up   |
| 5887990 | 7356001 | 1759921 | --- | --- | --- | 1,11 | up   |
| 5888009 | 7098411 | 1123732 | --- | --- | --- | 1,12 | up   |
| 5888031 | 7067335 | 1049470 | --- | --- | --- | 1,18 | up   |
| 5888158 | 7233012 | 1455407 | --- | --- | --- | 1,28 | up   |
| 5888488 | 7340057 | 1720334 | --- | --- | --- | 1,34 | down |
| 5888592 | 7131360 | 1204981 | --- | --- | --- | 1,58 | down |
| 5888699 | 7192186 | 1355616 | --- | --- | --- | 2,49 | up   |
| 5888747 | 7226241 | 1437814 | --- | --- | --- | 1,02 | down |
| 5888763 | 7087282 | 1096203 | --- | --- | --- | 1,04 | up   |
| 5888884 | 7266706 | 1538748 | --- | --- | --- | 1,16 | up   |
| 5888980 | 7078666 | 1076518 | --- | --- | --- | 1,00 | up   |
| 5889027 | 7156052 | 1265763 | --- | --- | --- | 1,21 | up   |
| 5889125 | 7115146 | 1164934 | --- | --- | --- | 1,06 | up   |
| 5889249 | 7312566 | 1653321 | --- | --- | --- | 1,84 | down |
| 5889371 | 7378997 | 1818644 | --- | --- | --- | 1,09 | up   |
| 5889561 | 7115880 | 1166833 | --- | --- | --- | 1,30 | down |
| 5889615 | 7092549 | 1109156 | --- | --- | --- | 1,19 | up   |
| 5889633 | 7339387 | 1718391 | --- | --- | --- | 1,03 | down |
| 5889674 | 7074132 | 1066322 | --- | --- | --- | 1,27 | down |
| 5889712 | 7279568 | 1572037 | --- | --- | --- | 3,02 | up   |
| 5889763 | 7253408 | 1505952 | --- | --- | --- | 1,28 | down |
| 5889987 | 7331297 | 1698821 | --- | --- | --- | 1,06 | up   |
| 5890097 | 7247229 | 1490554 | --- | --- | --- | 1,82 | up   |
| 5890226 | 7033337 | 969495  | --- | --- | --- | 1,05 | up   |
| 5890285 | 7122131 | 1182668 | --- | --- | --- | 1,12 | up   |
| 5890286 | 7037764 | 979995  | --- | --- | --- | 1,31 | down |
| 5890378 | 7299204 | 1619538 | --- | --- | --- | 1,02 | down |
| 5890398 | 7188685 | 1346333 | --- | --- | --- | 1,36 | up   |
| 5890467 | 7279499 | 1571822 | --- | --- | --- | 1,56 | down |
| 5890472 | 7067670 | 1050374 | --- | --- | --- | 1,58 | down |
| 5890677 | 7358859 | 1767011 | --- | --- | --- | 1,43 | up   |
| 5890686 | 7303616 | 1631316 | --- | --- | --- | 1,68 | up   |
| 5890811 | 7087282 | 1096152 | --- | --- | --- | 1,09 | down |
| 5890915 | 7337492 | 1713402 | --- | --- | --- | 1,11 | up   |
| 5890917 | 7211363 | 1402051 | --- | --- | --- | 1,03 | down |
| 5890927 | 7233440 | 1456836 | --- | --- | --- | 1,21 | down |
| 5890990 | 7217321 | 1416039 | --- | --- | --- | 1,17 | down |
| 5891011 | 7314270 | 1657753 | --- | --- | --- | 1,09 | down |
| 5891433 | 7281507 | 1576718 | --- | --- | --- | 1,04 | up   |
| 5891515 | 7061550 | 1035287 | --- | --- | --- | 2,02 | down |
| 5891571 | 7111573 | 1156017 | --- | --- | --- | 1,08 | up   |
| 5891627 | 7101258 | 1130563 | --- | --- | --- | 1,15 | up   |
| 5891938 | 7312627 | 1653489 | --- | --- | --- | 1,00 | up   |

|         |         |         |     |     |     |      |      |
|---------|---------|---------|-----|-----|-----|------|------|
| 5891955 | 7267802 | 1541733 | --- | --- | --- | 1,13 | down |
| 5891962 | 7360486 | 1770970 | --- | --- | --- | 1,02 | up   |
| 5891969 | 7358048 | 1764791 | --- | --- | --- | 1,14 | down |
| 5891988 | 7261019 | 1525281 | --- | --- | --- | 1,25 | down |
| 5891993 | 7108345 | 1148084 | --- | --- | --- | 1,56 | down |
| 5892062 | 7289909 | 1596508 | --- | --- | --- | 2,22 | down |
| 5892076 | 7034293 | 971945  | --- | --- | --- | 1,06 | up   |
| 5892134 | 7224166 | 1432674 | --- | --- | --- | 1,25 | down |
| 5892140 | 7065655 | 1045259 | --- | --- | --- | 1,41 | up   |
| 5892205 | 7361420 | 1773042 | --- | --- | --- | 1,07 | down |
| 5892214 | 7034532 | 972657  | --- | --- | --- | 2,02 | down |
| 5892261 | 7245874 | 1487587 | --- | --- | --- | 1,03 | down |
| 5892308 | 7339110 | 1717614 | --- | --- | --- | 1,85 | down |
| 5892382 | 7038153 | 981148  | --- | --- | --- | 1,10 | up   |
| 5892452 | 7228656 | 1444255 | --- | --- | --- | 1,01 | down |
| 5892568 | 7292810 | 1603253 | --- | --- | --- | 1,33 | up   |
| 5892618 | 7344406 | 1731265 | --- | --- | --- | 1,27 | down |
| 5892628 | 7297274 | 1614654 | --- | --- | --- | 1,28 | up   |
| 5892725 | 7059563 | 1030498 | --- | --- | --- | 1,14 | up   |
| 5892810 | 7238115 | 1468620 | --- | --- | --- | 1,09 | up   |
| 5893034 | 7153571 | 1259038 | --- | --- | --- | 1,38 | up   |
| 5893201 | 7196029 | 1365626 | --- | --- | --- | 1,27 | up   |
| 5893242 | 7186443 | 1341286 | --- | --- | --- | 1,12 | up   |
| 5893272 | 7326612 | 1687199 | --- | --- | --- | 1,52 | down |
| 5893482 | 7099573 | 1126709 | --- | --- | --- | 1,37 | down |
| 5893613 | 7129841 | 1200834 | --- | --- | --- | 1,27 | up   |
| 5893737 | 7365183 | 1781914 | --- | --- | --- | 1,15 | down |
| 5893848 | 7373678 | 1805858 | --- | --- | --- | 1,11 | up   |
| 5893871 | 7025652 | 950319  | --- | --- | --- | 1,20 | up   |
| 5893889 | 7237438 | 1466795 | --- | --- | --- | 1,22 | up   |
| 5893921 | 7067556 | 1050037 | --- | --- | --- | 1,03 | down |
| 5893996 | 7180861 | 1327200 | --- | --- | --- | 1,21 | up   |
| 5893998 | 7358048 | 1764803 | --- | --- | --- | 1,10 | down |
| 5894012 | 7180861 | 1327185 | --- | --- | --- | 1,32 | up   |
| 5894060 | 7131550 | 1205558 | --- | --- | --- | 1,44 | down |
| 5894192 | 7076160 | 1070965 | --- | --- | --- | 1,30 | up   |
| 5894209 | 7050655 | 1011011 | --- | --- | --- | 1,27 | down |
| 5894240 | 7065655 | 1045246 | --- | --- | --- | 1,10 | down |
| 5894323 | 7052813 | 1015883 | --- | --- | --- | 1,02 | down |
| 5894355 | 7350237 | 1745478 | --- | --- | --- | 1,43 | down |
| 5894398 | 7338807 | 1716791 | --- | --- | --- | 1,51 | down |
| 5894415 | 7229886 | 1447155 | --- | --- | --- | 2,14 | down |
| 5894497 | 7271008 | 1549930 | --- | --- | --- | 1,15 | up   |
| 5894700 | 7078666 | 1076510 | --- | --- | --- | 1,61 | down |
| 5894726 | 7330396 | 1696366 | --- | --- | --- | 1,25 | up   |
| 5894792 | 7090278 | 1104085 | --- | --- | --- | 1,13 | up   |
| 5894874 | 7353441 | 1753334 | --- | --- | --- | 1,01 | up   |
| 5894930 | 7286807 | 1588819 | --- | --- | --- | 1,06 | up   |
| 5895000 | 7111361 | 1155622 | --- | --- | --- | 1,51 | down |
| 5895026 | 7217747 | 1417487 | --- | --- | --- | 1,09 | up   |
| 5895055 | 7243130 | 1480923 | --- | --- | --- | 1,03 | down |
| 5895077 | 7156978 | 1268172 | --- | --- | --- | 1,09 | up   |
| 5895369 | 7340757 | 1721898 | --- | --- | --- | 1,44 | up   |
| 5895395 | 7101643 | 1131567 | --- | --- | --- | 1,27 | down |
| 5895828 | 7297589 | 1615671 | --- | --- | --- | 1,15 | down |
| 5896164 | 7240569 | 1475489 | --- | --- | --- | 1,23 | down |

|         |         |         |     |     |     |      |      |
|---------|---------|---------|-----|-----|-----|------|------|
| 5896228 | 7202550 | 1381612 | --- | --- | --- | 1,18 | up   |
| 5896293 | 7173863 | 1309713 | --- | --- | --- | 1,38 | down |
| 5896412 | 7352100 | 1750194 | --- | --- | --- | 1,28 | up   |
| 5896537 | 7319937 | 1672296 | --- | --- | --- | 1,19 | up   |
| 5896559 | 7161300 | 1278549 | --- | --- | --- | 1,28 | down |
| 5896614 | 7363768 | 1778601 | --- | --- | --- | 1,81 | down |
| 5896641 | 7061003 | 1033922 | --- | --- | --- | 1,01 | down |
| 5896698 | 7169732 | 1298771 | --- | --- | --- | 2,55 | up   |
| 5896726 | 7234195 | 1458980 | --- | --- | --- | 1,08 | down |
| 5896791 | 7320234 | 1673031 | --- | --- | --- | 1,05 | up   |
| 5896818 | 7113169 | 1160173 | --- | --- | --- | 1,08 | up   |
| 5896840 | 7060851 | 1033398 | --- | --- | --- | 1,05 | up   |
| 5896903 | 7098077 | 1122806 | --- | --- | --- | 1,06 | down |
| 5896969 | 7112225 | 1157546 | --- | --- | --- | 1,14 | down |
| 5897022 | 7185622 | 1339216 | --- | --- | --- | 1,32 | up   |
| 5897191 | 7195903 | 1365339 | --- | --- | --- | 1,00 | up   |
| 5897258 | 7097680 | 1121730 | --- | --- | --- | 1,07 | up   |
| 5897301 | 7197056 | 1367840 | --- | --- | --- | 1,14 | up   |
| 5897335 | 7037764 | 980080  | --- | --- | --- | 1,01 | down |
| 5897406 | 7280743 | 1574527 | --- | --- | --- | 1,40 | up   |
| 5897408 | 7198644 | 1372351 | --- | --- | --- | 1,04 | up   |
| 5897437 | 7356115 | 1760117 | --- | --- | --- | 1,18 | up   |
| 5897460 | 7103811 | 1137060 | --- | --- | --- | 1,02 | up   |
| 5897545 | 7030233 | 961173  | --- | --- | --- | 1,25 | down |
| 5897582 | 7301879 | 1626623 | --- | --- | --- | 2,91 | up   |
| 5897639 | 7339379 | 1718354 | --- | --- | --- | 1,19 | up   |
| 5897657 | 7294264 | 1606825 | --- | --- | --- | 1,06 | up   |
| 5897741 | 7068853 | 1053098 | --- | --- | --- | 1,13 | up   |
| 5897890 | 7321414 | 1675630 | --- | --- | --- | 1,00 | up   |
| 5898109 | 7309703 | 1646820 | --- | --- | --- | 1,23 | up   |
| 5898306 | 7267953 | 1542234 | --- | --- | --- | 2,28 | down |
| 5898348 | 7030863 | 962592  | --- | --- | --- | 1,20 | down |
| 5898385 | 7339286 | 1718107 | --- | --- | --- | 1,03 | down |
| 5898429 | 7064732 | 1042928 | --- | --- | --- | 1,32 | down |
| 5898449 | 7339110 | 1717614 | --- | --- | --- | 1,04 | up   |
| 5898515 | 7098189 | 1123166 | --- | --- | --- | 1,20 | down |
| 5898642 | 7113483 | 1161004 | --- | --- | --- | 1,23 | down |
| 5898680 | 7067670 | 1050319 | --- | --- | --- | 2,03 | up   |
| 5898793 | 7148978 | 1248479 | --- | --- | --- | 1,19 | down |
| 5898880 | 7052331 | 1014567 | --- | --- | --- | 1,03 | up   |
| 5898889 | 7277783 | 1567465 | --- | --- | --- | 2,20 | down |
| 5898917 | 7228520 | 1443766 | --- | --- | --- | 1,23 | down |
| 5899144 | 7039265 | 983658  | --- | --- | --- | 1,10 | up   |
| 5899391 | 7293757 | 1605684 | --- | --- | --- | 1,14 | up   |
| 5899408 | 7297589 | 1615609 | --- | --- | --- | 1,05 | up   |
| 5899432 | 7330181 | 1695711 | --- | --- | --- | 1,93 | up   |
| 5899492 | 7200545 | 1376908 | --- | --- | --- | 1,10 | down |
| 5899506 | 7240569 | 1475454 | --- | --- | --- | 1,03 | down |
| 5899513 | 7108551 | 1148699 | --- | --- | --- | 1,09 | up   |
| 5899714 | 7069830 | 1055614 | --- | --- | --- | 1,08 | up   |
| 5899751 | 7336727 | 1711287 | --- | --- | --- | 1,50 | down |
| 5899773 | 7374842 | 1808984 | --- | --- | --- | 1,00 | up   |
| 5899777 | 7096859 | 1119322 | --- | --- | --- | 1,36 | down |
| 5899891 | 7037764 | 980035  | --- | --- | --- | 1,06 | down |
| 5899985 | 7253408 | 1505938 | --- | --- | --- | 1,20 | up   |
| 5899990 | 7286807 | 1588810 | --- | --- | --- | 2,44 | down |

|         |         |         |     |     |     |      |      |
|---------|---------|---------|-----|-----|-----|------|------|
| 5900069 | 7181193 | 1328298 | --- | --- | --- | 1,05 | down |
| 5900073 | 7329846 | 1695005 | --- | --- | --- | 2,04 | down |
| 5900089 | 7068853 | 1053119 | --- | --- | --- | 1,08 | down |
| 5900147 | 7131889 | 1206094 | --- | --- | --- | 1,11 | down |
| 5900181 | 7360486 | 1770935 | --- | --- | --- | 1,26 | up   |
| 5900306 | 7078666 | 1076510 | --- | --- | --- | 1,02 | down |
| 5900313 | 7336250 | 1710171 | --- | --- | --- | 1,03 | down |
| 5900353 | 7271008 | 1549954 | --- | --- | --- | 1,08 | up   |
| 5900375 | 7191594 | 1354241 | --- | --- | --- | 1,67 | up   |
| 5900567 | 7101258 | 1130573 | --- | --- | --- | 1,19 | down |
| 5900601 | 7337224 | 1712600 | --- | --- | --- | 1,24 | down |
| 5900715 | 7199476 | 1374552 | --- | --- | --- | 1,02 | up   |
| 5900823 | 7127257 | 1194810 | --- | --- | --- | 1,62 | up   |
| 5900843 | 7211144 | 1401548 | --- | --- | --- | 1,41 | down |
| 5901006 | 7104920 | 1140058 | --- | --- | --- | 1,01 | down |
| 5901012 | 7298920 | 1618834 | --- | --- | --- | 1,44 | up   |
| 5901080 | 7268375 | 1543455 | --- | --- | --- | 1,06 | down |
| 5901089 | 7049689 | 1008874 | --- | --- | --- | 1,25 | up   |
| 5901108 | 7369938 | 1795531 | --- | --- | --- | 1,36 | down |
| 5901118 | 7033337 | 969519  | --- | --- | --- | 1,28 | up   |
| 5901202 | 7297274 | 1614613 | --- | --- | --- | 1,33 | up   |
| 5901229 | 7344406 | 1731218 | --- | --- | --- | 1,42 | down |
| 5901309 | 7087965 | 1098052 | --- | --- | --- | 1,09 | down |
| 5901363 | 7233440 | 1456916 | --- | --- | --- | 1,01 | up   |
| 5901462 | 7053874 | 1018317 | --- | --- | --- | 1,80 | down |
| 5901490 | 7053874 | 1018316 | --- | --- | --- | 1,07 | down |
| 5901492 | 7217679 | 1417311 | --- | --- | --- | 1,04 | down |
| 5901590 | 7033672 | 970358  | --- | --- | --- | 1,20 | up   |
| 5901593 | 7086966 | 1095248 | --- | --- | --- | 1,12 | down |
| 5901609 | 7247228 | 1490513 | --- | --- | --- | 1,28 | down |
| 5901682 | 7183182 | 1333576 | --- | --- | --- | 1,61 | up   |
| 5901718 | 7059375 | 1030050 | --- | --- | --- | 1,01 | up   |
| 5901777 | 7344190 | 1730612 | --- | --- | --- | 1,07 | down |
| 5901881 | 7039223 | 983552  | --- | --- | --- | 1,01 | up   |
| 5901959 | 7043535 | 994115  | --- | --- | --- | 1,13 | up   |
| 5902268 | 7268375 | 1543454 | --- | --- | --- | 1,08 | up   |
| 5902465 | 7198210 | 1370989 | --- | --- | --- | 1,39 | down |
| 5902516 | 7232029 | 1452742 | --- | --- | --- | 1,25 | up   |
| 5902614 | 7378997 | 1818661 | --- | --- | --- | 1,12 | up   |
| 5902751 | 7059765 | 1030954 | --- | --- | --- | 1,43 | down |
| 5902780 | 7058713 | 1028666 | --- | --- | --- | 1,08 | up   |
| 5902845 | 7097485 | 1120938 | --- | --- | --- | 1,27 | down |
| 5902862 | 7213945 | 1407853 | --- | --- | --- | 1,10 | down |
| 5902872 | 7294151 | 1606594 | --- | --- | --- | 1,00 | down |
| 5902917 | 7065827 | 1045721 | --- | --- | --- | 1,22 | up   |
| 5903067 | 7125348 | 1190088 | --- | --- | --- | 1,14 | up   |
| 5903069 | 7068073 | 1051176 | --- | --- | --- | 1,19 | up   |
| 5903171 | 7070616 | 1057774 | --- | --- | --- | 1,63 | down |
| 5903224 | 7095326 | 1115813 | --- | --- | --- | 1,53 | up   |
| 5903407 | 7302786 | 1628863 | --- | --- | --- | 1,18 | up   |
| 5903530 | 7249503 | 1496217 | --- | --- | --- | 1,05 | down |
| 5903651 | 7032083 | 965687  | --- | --- | --- | 1,21 | up   |
| 5903690 | 7217679 | 1417312 | --- | --- | --- | 1,47 | down |
| 5903804 | 7253088 | 1505123 | --- | --- | --- | 1,07 | down |
| 5903828 | 7211363 | 1402053 | --- | --- | --- | 1,38 | down |
| 5903879 | 7136977 | 1218862 | --- | --- | --- | 1,19 | down |

|         |         |         |     |     |     |      |      |
|---------|---------|---------|-----|-----|-----|------|------|
| 5903941 | 7171047 | 1302368 | --- | --- | --- | 1,36 | up   |
| 5903954 | 7180861 | 1327184 | --- | --- | --- | 1,20 | down |
| 5904067 | 7236492 | 1464553 | --- | --- | --- | 1,41 | up   |
| 5904118 | 7222221 | 1428057 | --- | --- | --- | 1,11 | up   |
| 5904180 | 7053874 | 1018317 | --- | --- | --- | 1,41 | up   |
| 5904205 | 7029078 | 958875  | --- | --- | --- | 1,14 | up   |
| 5904271 | 7341546 | 1723955 | --- | --- | --- | 1,14 | down |
| 5904278 | 7380497 | 1821850 | --- | --- | --- | 1,02 | down |
| 5904301 | 7189574 | 1348708 | --- | --- | --- | 1,06 | down |
| 5904474 | 7320337 | 1673338 | --- | --- | --- | 1,02 | down |
| 5904476 | 7080134 | 1079799 | --- | --- | --- | 3,24 | down |
| 5904691 | 7096924 | 1119615 | --- | --- | --- | 1,00 | down |
| 5904701 | 7038669 | 982188  | --- | --- | --- | 1,18 | down |
| 5904826 | 7064134 | 1041456 | --- | --- | --- | 1,35 | up   |
| 5904850 | 7115880 | 1166834 | --- | --- | --- | 1,10 | up   |
| 5904875 | 7167507 | 1293110 | --- | --- | --- | 1,11 | up   |
| 5904914 | 7172373 | 1305563 | --- | --- | --- | 1,61 | down |
| 5904960 | 7330238 | 1695951 | --- | --- | --- | 1,52 | down |
| 5904982 | 7225553 | 1435985 | --- | --- | --- | 1,03 | up   |
| 5905037 | 7292154 | 1601631 | --- | --- | --- | 1,18 | down |
| 5905048 | 7333333 | 1703393 | --- | --- | --- | 1,19 | up   |
| 5905052 | 7070616 | 1057788 | --- | --- | --- | 2,73 | down |
| 5905170 | 7226812 | 1439351 | --- | --- | --- | 1,56 | down |
| 5905310 | 7199476 | 1374520 | --- | --- | --- | 1,25 | down |
| 5905329 | 7112225 | 1157572 | --- | --- | --- | 1,08 | up   |
| 5905380 | 7157341 | 1269181 | --- | --- | --- | 1,09 | up   |
| 5905422 | 7095956 | 1117045 | --- | --- | --- | 1,15 | up   |
| 5905714 | 7319937 | 1672263 | --- | --- | --- | 1,20 | up   |
| 5905716 | 7293402 | 1604848 | --- | --- | --- | 1,13 | down |
| 5905752 | 7038316 | 981463  | --- | --- | --- | 1,07 | down |
| 5905829 | 7265259 | 1535448 | --- | --- | --- | 1,55 | up   |
| 5905833 | 7177180 | 1317764 | --- | --- | --- | 1,55 | up   |
| 5905912 | 7274892 | 1559567 | --- | --- | --- | 1,16 | down |
| 5906019 | 7118157 | 1172524 | --- | --- | --- | 1,02 | down |
| 5906148 | 7331413 | 1699131 | --- | --- | --- | 2,00 | up   |
| 5906167 | 7119179 | 1174970 | --- | --- | --- | 1,26 | up   |
| 5906265 | 7374790 | 1808782 | --- | --- | --- | 1,14 | down |
| 5906313 | 7061003 | 1033923 | --- | --- | --- | 1,19 | up   |
| 5906378 | 7230698 | 1449067 | --- | --- | --- | 1,40 | up   |
| 5906408 | 7121866 | 1181882 | --- | --- | --- | 1,34 | up   |
| 5906502 | 7312942 | 1654171 | --- | --- | --- | 1,36 | up   |
| 5906509 | 7038153 | 981161  | --- | --- | --- | 1,09 | down |
| 5906544 | 7064134 | 1041468 | --- | --- | --- | 1,17 | up   |
| 5906581 | 7076236 | 1071188 | --- | --- | --- | 1,16 | down |
| 5906645 | 7243363 | 1481615 | --- | --- | --- | 1,03 | up   |
| 5906690 | 7172066 | 1304734 | --- | --- | --- | 1,25 | up   |
| 5906745 | 7341646 | 1724193 | --- | --- | --- | 1,05 | down |
| 5906825 | 7171525 | 1303444 | --- | --- | --- | 1,05 | down |
| 5906861 | 7069142 | 1053874 | --- | --- | --- | 1,00 | up   |
| 5906918 | 7307424 | 1641138 | --- | --- | --- | 1,32 | up   |
| 5906961 | 7374143 | 1807010 | --- | --- | --- | 1,24 | down |
| 5907108 | 7371682 | 1800791 | --- | --- | --- | 2,21 | down |
| 5907193 | 7340838 | 1722059 | --- | --- | --- | 1,16 | up   |
| 5907237 | 7097680 | 1121741 | --- | --- | --- | 1,03 | down |
| 5907542 | 7213908 | 1407761 | --- | --- | --- | 1,31 | down |
| 5907627 | 7287238 | 1589771 | --- | --- | --- | 2,28 | down |



|         |         |         |     |     |     |      |      |
|---------|---------|---------|-----|-----|-----|------|------|
| 5907742 | 7243363 | 1481594 | --- | --- | --- | 1,08 | up   |
| 5907856 | 7316644 | 1664005 | --- | --- | --- | 1,16 | down |
| 5907865 | 7120039 | 1177522 | --- | --- | --- | 1,23 | up   |
| 5907872 | 7358859 | 1767007 | --- | --- | --- | 1,12 | up   |
| 5907922 | 7374790 | 1808780 | --- | --- | --- | 1,17 | up   |
| 5908017 | 7159177 | 1273338 | --- | --- | --- | 1,09 | down |
| 5908045 | 7098867 | 1124950 | --- | --- | --- | 1,74 | down |
| 5908182 | 7373417 | 1805121 | --- | --- | --- | 1,17 | up   |
| 5908272 | 7231152 | 1450232 | --- | --- | --- | 1,20 | up   |
| 5908311 | 7151063 | 1253061 | --- | --- | --- | 1,15 | up   |
| 5908320 | 7207069 | 1392031 | --- | --- | --- | 1,84 | down |
| 5908431 | 7280743 | 1574478 | --- | --- | --- | 1,07 | down |
| 5908715 | 7193644 | 1359716 | --- | --- | --- | 1,17 | down |
| 5908779 | 7097485 | 1120935 | --- | --- | --- | 1,25 | up   |
| 5908872 | 7093936 | 1112479 | --- | --- | --- | 1,02 | up   |
| 5909034 | 7065265 | 1044573 | --- | --- | --- | 1,30 | up   |
| 5909072 | 7340258 | 1720734 | --- | --- | --- | 1,13 | up   |
| 5909120 | 7043379 | 993650  | --- | --- | --- | 1,16 | up   |
| 5909124 | 7112225 | 1157601 | --- | --- | --- | 1,07 | up   |
| 5909184 | 7330238 | 1695935 | --- | --- | --- | 1,09 | up   |
| 5909289 | 7237719 | 1467477 | --- | --- | --- | 1,13 | down |
| 5909317 | 7115880 | 1166835 | --- | --- | --- | 1,16 | down |
| 5909454 | 7240569 | 1475462 | --- | --- | --- | 1,17 | up   |
| 5909469 | 7180732 | 1326734 | --- | --- | --- | 2,33 | down |
| 5909494 | 7198210 | 1370973 | --- | --- | --- | 1,23 | down |
| 5909528 | 7176456 | 1315829 | --- | --- | --- | 1,42 | up   |
| 5909579 | 7080106 | 1079716 | --- | --- | --- | 1,29 | up   |
| 5909677 | 7297589 | 1615687 | --- | --- | --- | 1,51 | up   |
| 5909708 | 7183182 | 1333559 | --- | --- | --- | 1,13 | down |
| 5909710 | 7088164 | 1098477 | --- | --- | --- | 1,26 | up   |
| 5909758 | 7131550 | 1205555 | --- | --- | --- | 1,31 | up   |
| 5909775 | 7340838 | 1722064 | --- | --- | --- | 1,40 | up   |
| 5909797 | 7200129 | 1375998 | --- | --- | --- | 1,03 | up   |
| 5909848 | 7274585 | 1558769 | --- | --- | --- | 1,08 | down |
| 5909856 | 7337522 | 1713596 | --- | --- | --- | 1,46 | down |
| 5909987 | 7058713 | 1028666 | --- | --- | --- | 1,21 | up   |
| 5909993 | 7360486 | 1770949 | --- | --- | --- | 1,18 | up   |
| 5910008 | 7163892 | 1284214 | --- | --- | --- | 2,14 | down |
| 5910028 | 7302786 | 1628862 | --- | --- | --- | 1,19 | up   |
| 5910237 | 7236987 | 1465736 | --- | --- | --- | 1,07 | down |
| 5910297 | 7202550 | 1381619 | --- | --- | --- | 1,55 | up   |
| 5910317 | 7127797 | 1195853 | --- | --- | --- | 1,18 | up   |
| 5910455 | 7381993 | 1825218 | --- | --- | --- | 2,14 | up   |
| 5910540 | 7379957 | 1820644 | --- | --- | --- | 1,51 | up   |
| 5910581 | 7281923 | 1577696 | --- | --- | --- | 3,28 | down |
| 5910618 | 7255120 | 1510371 | --- | --- | --- | 1,13 | up   |
| 5910746 | 7320337 | 1673331 | --- | --- | --- | 1,42 | down |
| 5910749 | 7127540 | 1195270 | --- | --- | --- | 1,09 | down |
| 5910917 | 7070869 | 1058469 | --- | --- | --- | 1,35 | up   |
| 5910924 | 7031833 | 964910  | --- | --- | --- | 1,18 | up   |
| 5911067 | 7297589 | 1615649 | --- | --- | --- | 1,21 | down |
| 5911181 | 7247848 | 1492065 | --- | --- | --- | 1,06 | up   |
| 5911241 | 7073854 | 1065633 | --- | --- | --- | 1,03 | up   |
| 5911261 | 7199476 | 1374527 | --- | --- | --- | 2,64 | down |
| 5911310 | 7139709 | 1225074 | --- | --- | --- | 1,10 | down |
| 5911351 | 7180861 | 1327208 | --- | --- | --- | 1,01 | up   |

|         |         |         |     |     |     |      |      |
|---------|---------|---------|-----|-----|-----|------|------|
| 5911385 | 7280743 | 1574525 | --- | --- | --- | 1,25 | down |
| 5911449 | 7365183 | 1781915 | --- | --- | --- | 1,46 | down |
| 5911461 | 7029770 | 960158  | --- | --- | --- | 1,33 | down |
| 5911594 | 7384073 | 1829452 | --- | --- | --- | 1,46 | down |
| 5911629 | 7060851 | 1033384 | --- | --- | --- | 1,21 | down |
| 5911644 | 7071264 | 1059355 | --- | --- | --- | 1,10 | down |
| 5911824 | 7156372 | 1266706 | --- | --- | --- | 1,17 | down |
| 5911852 | 7297589 | 1615687 | --- | --- | --- | 1,07 | down |
| 5912085 | 7312566 | 1653322 | --- | --- | --- | 1,57 | down |
| 5912099 | 7069239 | 1054080 | --- | --- | --- | 1,17 | down |
| 5912131 | 7101400 | 1130893 | --- | --- | --- | 1,22 | up   |
| 5912153 | 7337845 | 1714340 | --- | --- | --- | 1,10 | up   |
| 5912233 | 7114108 | 1162453 | --- | --- | --- | 1,04 | down |
| 5912288 | 7243628 | 1482364 | --- | --- | --- | 1,43 | down |
| 5912382 | 7059584 | 1030546 | --- | --- | --- | 1,63 | down |
| 5912468 | 7188829 | 1346653 | --- | --- | --- | 1,37 | down |
| 5912548 | 7096924 | 1119603 | --- | --- | --- | 1,01 | down |
| 5912555 | 7099573 | 1126742 | --- | --- | --- | 1,21 | up   |
| 5912659 | 7307721 | 1642006 | --- | --- | --- | 1,00 | up   |
| 5912688 | 7339387 | 1718396 | --- | --- | --- | 1,75 | down |
| 5912754 | 7092965 | 1110178 | --- | --- | --- | 1,11 | down |
| 5912843 | 7289382 | 1595213 | --- | --- | --- | 1,02 | up   |
| 5912904 | 7316644 | 1664046 | --- | --- | --- | 1,03 | down |
| 5912998 | 7043535 | 994093  | --- | --- | --- | 1,17 | down |
| 5913119 | 7351951 | 1749835 | --- | --- | --- | 1,29 | down |
| 5913144 | 7240224 | 1474394 | --- | --- | --- | 1,06 | up   |
| 5913197 | 7039271 | 983706  | --- | --- | --- | 1,04 | up   |
| 5913215 | 7049118 | 1007774 | --- | --- | --- | 1,14 | down |
| 5913303 | 7065266 | 1044592 | --- | --- | --- | 1,80 | up   |
| 5913305 | 7293757 | 1605685 | --- | --- | --- | 1,09 | up   |
| 5913328 | 7368004 | 1789332 | --- | --- | --- | 1,16 | down |
| 5913407 | 7367969 | 1789094 | --- | --- | --- | 1,15 | up   |
| 5913484 | 7108300 | 1147909 | --- | --- | --- | 1,10 | down |
| 5913560 | 7340258 | 1720734 | --- | --- | --- | 1,70 | down |
| 5913611 | 7329135 | 1693488 | --- | --- | --- | 1,12 | up   |
| 5913653 | 7025652 | 950343  | --- | --- | --- | 1,29 | down |
| 5913673 | 7122131 | 1182668 | --- | --- | --- | 1,17 | down |
| 5913690 | 7198210 | 1370972 | --- | --- | --- | 1,11 | down |
| 5913751 | 7119930 | 1177217 | --- | --- | --- | 1,11 | up   |
| 5913766 | 7056333 | 1023680 | --- | --- | --- | 1,06 | up   |
| 5913833 | 7285688 | 1586193 | --- | --- | --- | 1,10 | up   |
| 5913917 | 7084993 | 1090672 | --- | --- | --- | 1,19 | up   |
| 5913937 | 7169732 | 1298782 | --- | --- | --- | 1,20 | down |
| 5914159 | 7341253 | 1723307 | --- | --- | --- | 1,01 | up   |
| 5914253 | 7280743 | 1574481 | --- | --- | --- | 1,07 | down |
| 5914349 | 7351951 | 1749848 | --- | --- | --- | 1,10 | up   |
| 5914417 | 7181105 | 1327967 | --- | --- | --- | 1,44 | up   |
| 5914454 | 7180861 | 1327185 | --- | --- | --- | 1,20 | down |
| 5914472 | 7168858 | 1296827 | --- | --- | --- | 1,04 | down |
| 5914511 | 7131550 | 1205555 | --- | --- | --- | 1,03 | down |
| 5914525 | 7360486 | 1770935 | --- | --- | --- | 1,03 | up   |
| 5914688 | 7248790 | 1494513 | --- | --- | --- | 1,00 | down |
| 5914716 | 7257963 | 1517672 | --- | --- | --- | 1,95 | up   |
| 5914754 | 7139026 | 1223494 | --- | --- | --- | 1,33 | down |
| 5914779 | 7075445 | 1069360 | --- | --- | --- | 1,03 | up   |
| 5914825 | 7183927 | 1335500 | --- | --- | --- | 1,02 | down |

|         |         |         |     |     |     |      |      |
|---------|---------|---------|-----|-----|-----|------|------|
| 5914851 | 7255663 | 1511712 | --- | --- | --- | 1,00 | down |
| 5914908 | 7281923 | 1577696 | --- | --- | --- | 1,08 | down |
| 5915117 | 7094158 | 1112969 | --- | --- | --- | 2,55 | down |
| 5915153 | 7243603 | 1482281 | --- | --- | --- | 1,16 | down |
| 5915157 | 7226241 | 1437805 | --- | --- | --- | 1,44 | down |
| 5915301 | 7346505 | 1736286 | --- | --- | --- | 2,47 | down |
| 5915466 | 7168858 | 1296847 | --- | --- | --- | 1,04 | up   |
| 5915595 | 7301140 | 1624592 | --- | --- | --- | 1,18 | down |
| 5915637 | 7254053 | 1507638 | --- | --- | --- | 1,03 | up   |
| 5915655 | 7070461 | 1057368 | --- | --- | --- | 1,05 | up   |
| 5915666 | 7327169 | 1688459 | --- | --- | --- | 1,15 | down |
| 5915683 | 7273251 | 1555948 | --- | --- | --- | 1,16 | down |
| 5915737 | 7186440 | 1341259 | --- | --- | --- | 1,01 | up   |
| 5915959 | 7243603 | 1482256 | --- | --- | --- | 1,23 | down |
| 5916077 | 7336931 | 1711869 | --- | --- | --- | 1,31 | down |
| 5916130 | 7115362 | 1165596 | --- | --- | --- | 1,01 | up   |
| 5916133 | 7258520 | 1518859 | --- | --- | --- | 1,22 | down |
| 5916147 | 7186688 | 1341840 | --- | --- | --- | 1,05 | down |
| 5916170 | 7025652 | 950281  | --- | --- | --- | 1,00 | up   |
| 5916271 | 7323560 | 1680040 | --- | --- | --- | 1,52 | up   |
| 5916279 | 7327169 | 1688468 | --- | --- | --- | 1,14 | down |
| 5916343 | 7331297 | 1698807 | --- | --- | --- | 1,33 | up   |
| 5916400 | 7264808 | 1534473 | --- | --- | --- | 1,14 | down |
| 5916427 | 7297274 | 1614654 | --- | --- | --- | 1,10 | up   |
| 5916522 | 7364346 | 1780021 | --- | --- | --- | 1,05 | up   |
| 5916878 | 7148978 | 1248546 | --- | --- | --- | 1,40 | down |
| 5916904 | 7217679 | 1417307 | --- | --- | --- | 1,25 | up   |
| 5916923 | 7088164 | 1098472 | --- | --- | --- | 1,94 | down |
| 5917060 | 7229886 | 1447147 | --- | --- | --- | 1,17 | down |
| 5917241 | 7344836 | 1732411 | --- | --- | --- | 1,05 | down |
| 5917284 | 7280743 | 1574570 | --- | --- | --- | 1,08 | up   |
| 5917312 | 7097454 | 1120881 | --- | --- | --- | 1,33 | down |
| 5917351 | 7211363 | 1402044 | --- | --- | --- | 2,51 | down |
| 5917430 | 7345882 | 1734798 | --- | --- | --- | 1,13 | up   |
| 5917433 | 7381993 | 1825219 | --- | --- | --- | 2,16 | up   |
| 5917471 | 7038153 | 981158  | --- | --- | --- | 1,50 | up   |
| 5917517 | 7233359 | 1456512 | --- | --- | --- | 1,16 | up   |
| 5917557 | 7056333 | 1023677 | --- | --- | --- | 1,22 | down |
| 5917604 | 7222221 | 1428066 | --- | --- | --- | 1,42 | down |
| 5917677 | 7233440 | 1456829 | --- | --- | --- | 1,01 | down |
| 5917741 | 7038530 | 981874  | --- | --- | --- | 1,04 | up   |
| 5917756 | 7243628 | 1482367 | --- | --- | --- | 1,56 | up   |
| 5917838 | 7257361 | 1516092 | --- | --- | --- | 1,14 | up   |
| 5917899 | 7039302 | 983841  | --- | --- | --- | 1,06 | down |
| 5917933 | 7064220 | 1041738 | --- | --- | --- | 1,35 | down |
| 5918006 | 7041609 | 989592  | --- | --- | --- | 1,21 | up   |
| 5918059 | 7050780 | 1011373 | --- | --- | --- | 1,14 | up   |
| 5918174 | 7193644 | 1359708 | --- | --- | --- | 1,06 | up   |
| 5918344 | 7319937 | 1672269 | --- | --- | --- | 1,39 | down |
| 5918410 | 7099573 | 1126733 | --- | --- | --- | 1,04 | up   |
| 5918422 | 7159642 | 1274217 | --- | --- | --- | 1,00 | down |
| 5918525 | 7233923 | 1458163 | --- | --- | --- | 1,03 | up   |
| 5918597 | 7380497 | 1821871 | --- | --- | --- | 1,02 | up   |
| 5918900 | 7373417 | 1805107 | --- | --- | --- | 1,17 | down |
| 5919026 | 7037806 | 980219  | --- | --- | --- | 1,50 | up   |
| 5919070 | 7293757 | 1605671 | --- | --- | --- | 1,20 | down |

|         |         |         |     |     |     |      |      |
|---------|---------|---------|-----|-----|-----|------|------|
| 5919089 | 7183182 | 1333574 | --- | --- | --- | 1,22 | down |
| 5919114 | 7380497 | 1821826 | --- | --- | --- | 1,05 | down |
| 5919211 | 7074132 | 1066328 | --- | --- | --- | 1,45 | down |
| 5919456 | 7087282 | 1096204 | --- | --- | --- | 1,00 | up   |
| 5919500 | 7143455 | 1234725 | --- | --- | --- | 2,00 | down |
| 5919529 | 7141421 | 1229477 | --- | --- | --- | 1,03 | up   |
| 5919573 | 7327650 | 1689681 | --- | --- | --- | 1,30 | up   |
| 5919658 | 7266706 | 1538746 | --- | --- | --- | 1,12 | up   |
| 5919666 | 7280743 | 1574485 | --- | --- | --- | 1,53 | down |
| 5919668 | 7068259 | 1051649 | --- | --- | --- | 1,86 | down |
| 5919694 | 7339732 | 1719218 | --- | --- | --- | 1,39 | up   |
| 5919727 | 7093936 | 1112469 | --- | --- | --- | 1,68 | down |
| 5919753 | 7027759 | 956129  | --- | --- | --- | 1,02 | down |
| 5919773 | 7384073 | 1829463 | --- | --- | --- | 1,15 | up   |
| 5919820 | 7237719 | 1467496 | --- | --- | --- | 1,39 | up   |
| 5919838 | 7294151 | 1606636 | --- | --- | --- | 1,19 | up   |
| 5919862 | 7179914 | 1324717 | --- | --- | --- | 1,10 | up   |
| 5919965 | 7368004 | 1789332 | --- | --- | --- | 1,14 | down |
| 5919982 | 7373038 | 1804293 | --- | --- | --- | 1,05 | down |
| 5920142 | 7093936 | 1112479 | --- | --- | --- | 1,13 | down |
| 5920171 | 7099573 | 1126724 | --- | --- | --- | 1,04 | down |
| 5920187 | 7341646 | 1724194 | --- | --- | --- | 1,27 | up   |
| 5920217 | 7319937 | 1672301 | --- | --- | --- | 1,07 | down |
| 5920289 | 7281950 | 1577790 | --- | --- | --- | 1,46 | up   |
| 5920464 | 7098366 | 1123608 | --- | --- | --- | 1,09 | up   |
| 5920570 | 7037764 | 979992  | --- | --- | --- | 1,20 | up   |
| 5920599 | 7049689 | 1008886 | --- | --- | --- | 1,43 | up   |
| 5920677 | 7363674 | 1778439 | --- | --- | --- | 1,02 | up   |
| 5920758 | 7115708 | 1166475 | --- | --- | --- | 1,21 | down |
| 5920827 | 7059375 | 1030053 | --- | --- | --- | 1,18 | up   |
| 5920862 | 7319937 | 1672288 | --- | --- | --- | 1,44 | up   |
| 5920894 | 7069830 | 1055636 | --- | --- | --- | 1,30 | up   |
| 5920958 | 7340757 | 1721900 | --- | --- | --- | 1,10 | down |
| 5920987 | 7119930 | 1177227 | --- | --- | --- | 1,10 | down |
| 5921103 | 7312566 | 1653304 | --- | --- | --- | 1,64 | down |
| 5921173 | 7132263 | 1206889 | --- | --- | --- | 1,27 | up   |
| 5921303 | 7244290 | 1484145 | --- | --- | --- | 1,04 | down |
| 5921312 | 7159642 | 1274219 | --- | --- | --- | 1,03 | down |
| 5921352 | 7033672 | 970340  | --- | --- | --- | 1,31 | down |
| 5921383 | 7189689 | 1349047 | --- | --- | --- | 1,21 | up   |
| 5921642 | 7080731 | 1080973 | --- | --- | --- | 1,10 | up   |
| 5921792 | 7054147 | 1018982 | --- | --- | --- | 1,32 | down |
| 5921798 | 7179785 | 1324499 | --- | --- | --- | 1,11 | down |
| 5921822 | 7321414 | 1675632 | --- | --- | --- | 1,08 | down |
| 5921850 | 7086522 | 1093935 | --- | --- | --- | 1,26 | down |
| 5921886 | 7036412 | 976869  | --- | --- | --- | 1,33 | up   |
| 5921912 | 7293402 | 1604856 | --- | --- | --- | 1,06 | up   |
| 5921917 | 7291054 | 1599400 | --- | --- | --- | 2,99 | down |
| 5921936 | 7059020 | 1029347 | --- | --- | --- | 1,06 | up   |
| 5922019 | 7277783 | 1567465 | --- | --- | --- | 1,27 | down |
| 5922027 | 7065655 | 1045239 | --- | --- | --- | 1,13 | down |
| 5922191 | 7287222 | 1589714 | --- | --- | --- | 1,21 | up   |
| 5922292 | 7056333 | 1023675 | --- | --- | --- | 1,43 | up   |
| 5922316 | 7237719 | 1467493 | --- | --- | --- | 1,15 | up   |
| 5922461 | 7243363 | 1481603 | --- | --- | --- | 1,14 | down |
| 5922469 | 7279073 | 1570680 | --- | --- | --- | 1,09 | down |

|         |         |         |     |     |     |      |      |
|---------|---------|---------|-----|-----|-----|------|------|
| 5922591 | 7364346 | 1779980 | --- | --- | --- | 1,15 | down |
| 5922684 | 7200996 | 1378153 | --- | --- | --- | 1,29 | down |
| 5922712 | 7217747 | 1417495 | --- | --- | --- | 1,08 | up   |
| 5922799 | 7127540 | 1195270 | --- | --- | --- | 1,13 | down |
| 5922835 | 7084792 | 1090341 | --- | --- | --- | 1,02 | up   |
| 5922862 | 7096924 | 1119619 | --- | --- | --- | 1,40 | up   |
| 5922869 | 7068259 | 1051626 | --- | --- | --- | 1,06 | up   |
| 5922925 | 7198210 | 1370984 | --- | --- | --- | 1,08 | up   |
| 5922975 | 7068259 | 1051610 | --- | --- | --- | 1,35 | down |
| 5922985 | 7132125 | 1206639 | --- | --- | --- | 1,19 | up   |
| 5923031 | 7096924 | 1119624 | --- | --- | --- | 1,21 | down |
| 5923132 | 7373417 | 1805100 | --- | --- | --- | 1,01 | down |
| 5923219 | 7038669 | 982180  | --- | --- | --- | 2,07 | down |
| 5923316 | 7358859 | 1766970 | --- | --- | --- | 1,16 | down |
| 5923564 | 7212735 | 1405035 | --- | --- | --- | 2,80 | up   |
| 5923654 | 7059961 | 1031401 | --- | --- | --- | 1,14 | up   |
| 5923671 | 7234434 | 1459440 | --- | --- | --- | 1,08 | up   |
| 5923729 | 7342959 | 1727342 | --- | --- | --- | 1,18 | up   |
| 5923767 | 7251608 | 1501456 | --- | --- | --- | 1,05 | down |
| 5923821 | 7146093 | 1240986 | --- | --- | --- | 1,06 | up   |
| 5923888 | 7244288 | 1484120 | --- | --- | --- | 1,25 | down |
| 5923992 | 7112570 | 1158654 | --- | --- | --- | 1,57 | down |
| 5924026 | 7219605 | 1422065 | --- | --- | --- | 1,35 | up   |
| 5924064 | 7137751 | 1220585 | --- | --- | --- | 1,40 | up   |
| 5924108 | 7268693 | 1544184 | --- | --- | --- | 1,43 | down |
| 5924121 | 7139026 | 1223508 | --- | --- | --- | 1,96 | up   |
| 5924391 | 7358859 | 1767006 | --- | --- | --- | 1,46 | down |
| 5924418 | 7097084 | 1119949 | --- | --- | --- | 3,03 | up   |
| 5924456 | 7033672 | 970360  | --- | --- | --- | 1,34 | down |
| 5924679 | 7334331 | 1705698 | --- | --- | --- | 1,07 | down |
| 5924689 | 7217650 | 1417182 | --- | --- | --- | 1,41 | down |
| 5924727 | 7052331 | 1014597 | --- | --- | --- | 1,47 | down |
| 5924787 | 7040260 | 986047  | --- | --- | --- | 1,04 | down |
| 5924821 | 7150348 | 1251398 | --- | --- | --- | 1,03 | down |
| 5924838 | 7330396 | 1696335 | --- | --- | --- | 1,16 | up   |
| 5924944 | 7274892 | 1559526 | --- | --- | --- | 1,39 | up   |
| 5924956 | 7055876 | 1022469 | --- | --- | --- | 1,22 | down |
| 5925172 | 7274780 | 1559208 | --- | --- | --- | 1,32 | up   |
| 5925207 | 7168403 | 1295573 | --- | --- | --- | 1,47 | down |
| 5925269 | 7243363 | 1481583 | --- | --- | --- | 1,02 | up   |
| 5925308 | 7281140 | 1575712 | --- | --- | --- | 1,93 | up   |
| 5925340 | 7217747 | 1417505 | --- | --- | --- | 1,07 | down |
| 5925452 | 7255663 | 1511711 | --- | --- | --- | 1,10 | down |
| 5925469 | 7157341 | 1269149 | --- | --- | --- | 1,22 | up   |
| 5925611 | 7215394 | 1411279 | --- | --- | --- | 1,02 | down |
| 5925623 | 7312566 | 1653321 | --- | --- | --- | 1,24 | down |
| 5925833 | 7343092 | 1727657 | --- | --- | --- | 1,24 | up   |
| 5925928 | 7359551 | 1768623 | --- | --- | --- | 1,12 | down |
| 5925933 | 7363922 | 1778872 | --- | --- | --- | 1,51 | down |
| 5926229 | 7249737 | 1496749 | --- | --- | --- | 1,19 | down |
| 5926277 | 7331434 | 1699199 | --- | --- | --- | 1,15 | down |
| 5926333 | 7068697 | 1052760 | --- | --- | --- | 1,11 | down |
| 5926369 | 7331237 | 1698721 | --- | --- | --- | 1,01 | down |
| 5926483 | 7127691 | 1195628 | --- | --- | --- | 1,31 | up   |
| 5926521 | 7243130 | 1480825 | --- | --- | --- | 1,14 | up   |
| 5926636 | 7281507 | 1576711 | --- | --- | --- | 1,19 | down |

|         |         |         |     |     |     |      |      |
|---------|---------|---------|-----|-----|-----|------|------|
| 5926687 | 7075096 | 1068605 | --- | --- | --- | 1,13 | up   |
| 5926728 | 7127540 | 1195298 | --- | --- | --- | 1,33 | down |
| 5926849 | 7174281 | 1310877 | --- | --- | --- | 1,55 | down |
| 5926971 | 7318143 | 1668091 | --- | --- | --- | 2,42 | down |
| 5927017 | 7286807 | 1588798 | --- | --- | --- | 1,09 | up   |
| 5927052 | 7142081 | 1230973 | --- | --- | --- | 1,32 | up   |
| 5927171 | 7034293 | 971956  | --- | --- | --- | 1,25 | down |
| 5927182 | 7097680 | 1121717 | --- | --- | --- | 1,08 | down |
| 5927361 | 7229886 | 1447145 | --- | --- | --- | 1,40 | up   |
| 5927471 | 7342959 | 1727332 | --- | --- | --- | 1,06 | up   |
| 5927519 | 7340757 | 1721907 | --- | --- | --- | 1,57 | down |
| 5927548 | 7273744 | 1557022 | --- | --- | --- | 1,11 | up   |
| 5927591 | 7217650 | 1417194 | --- | --- | --- | 1,45 | up   |
| 5927615 | 7274892 | 1559555 | --- | --- | --- | 1,07 | down |
| 5927617 | 7373634 | 1805724 | --- | --- | --- | 1,28 | down |
| 5927637 | 7258784 | 1519674 | --- | --- | --- | 1,70 | down |
| 5927734 | 7243130 | 1480839 | --- | --- | --- | 1,47 | down |
| 5927830 | 7098411 | 1123705 | --- | --- | --- | 1,03 | down |
| 5927863 | 7088489 | 1099518 | --- | --- | --- | 1,03 | up   |
| 5927966 | 7179785 | 1324491 | --- | --- | --- | 1,99 | down |
| 5927994 | 7131550 | 1205565 | --- | --- | --- | 1,81 | down |
| 5928054 | 7330727 | 1697143 | --- | --- | --- | 1,24 | down |
| 5928312 | 7108551 | 1148694 | --- | --- | --- | 1,53 | up   |
| 5928492 | 7137646 | 1220437 | --- | --- | --- | 1,23 | down |
| 5928574 | 7117158 | 1169994 | --- | --- | --- | 1,73 | up   |
| 5928711 | 7049399 | 1008394 | --- | --- | --- | 1,15 | up   |
| 5928841 | 7279533 | 1571916 | --- | --- | --- | 1,00 | up   |
| 5928861 | 7364346 | 1780004 | --- | --- | --- | 1,19 | up   |
| 5928907 | 7043379 | 993638  | --- | --- | --- | 1,03 | up   |
| 5929018 | 7277719 | 1567068 | --- | --- | --- | 1,79 | up   |
| 5929029 | 7198210 | 1370985 | --- | --- | --- | 1,19 | down |
| 5929084 | 7186106 | 1340503 | --- | --- | --- | 2,55 | up   |
| 5929091 | 7099573 | 1126714 | --- | --- | --- | 1,01 | down |
| 5929118 | 7115362 | 1165593 | --- | --- | --- | 1,29 | down |
| 5929141 | 7303616 | 1631327 | --- | --- | --- | 1,09 | down |
| 5929218 | 7340838 | 1722048 | --- | --- | --- | 1,01 | up   |
| 5929249 | 7065655 | 1045258 | --- | --- | --- | 1,05 | down |
| 5929270 | 7337845 | 1714334 | --- | --- | --- | 1,32 | up   |
| 5929297 | 7099517 | 1126495 | --- | --- | --- | 1,12 | up   |
| 5929377 | 7180732 | 1326738 | --- | --- | --- | 1,41 | down |
| 5929680 | 7024628 | 947422  | --- | --- | --- | 1,00 | up   |
| 5929713 | 7041609 | 989593  | --- | --- | --- | 1,09 | down |
| 5929760 | 7034293 | 971965  | --- | --- | --- | 1,39 | down |
| 5929776 | 7214605 | 1409375 | --- | --- | --- | 1,38 | up   |
| 5929800 | 7030233 | 961176  | --- | --- | --- | 1,11 | down |
| 5929815 | 7170764 | 1301447 | --- | --- | --- | 1,17 | up   |
| 5929896 | 7268736 | 1544316 | --- | --- | --- | 1,27 | up   |
| 5930035 | 7162959 | 1282088 | --- | --- | --- | 1,02 | up   |
| 5930104 | 7232340 | 1453532 | --- | --- | --- | 1,07 | up   |
| 5930129 | 7068259 | 1051642 | --- | --- | --- | 1,31 | up   |
| 5930223 | 7284934 | 1584914 | --- | --- | --- | 1,16 | down |
| 5930475 | 7068697 | 1052769 | --- | --- | --- | 1,11 | up   |
| 5930518 | 7271213 | 1550650 | --- | --- | --- | 1,07 | down |
| 5930610 | 7165954 | 1288770 | --- | --- | --- | 1,11 | down |
| 5930743 | 7372840 | 1803770 | --- | --- | --- | 1,30 | down |
| 5930856 | 7363576 | 1778194 | --- | --- | --- | 1,17 | up   |

|         |         |         |     |     |     |      |      |
|---------|---------|---------|-----|-----|-----|------|------|
| 5930886 | 7244290 | 1484160 | --- | --- | --- | 1,77 | down |
| 5930914 | 7384509 | 1830747 | --- | --- | --- | 1,33 | up   |
| 5931016 | 7373906 | 1806372 | --- | --- | --- | 1,15 | up   |
| 5931058 | 7129688 | 1200557 | --- | --- | --- | 1,93 | up   |
| 5931096 | 7236358 | 1464222 | --- | --- | --- | 2,23 | down |
| 5931220 | 7159177 | 1273349 | --- | --- | --- | 1,31 | down |
| 5931302 | 7045955 | 1000739 | --- | --- | --- | 1,65 | down |
| 5931309 | 7301140 | 1624537 | --- | --- | --- | 1,02 | down |
| 5931415 | 7148978 | 1248545 | --- | --- | --- | 1,01 | up   |
| 5931469 | 7061550 | 1035289 | --- | --- | --- | 1,12 | up   |
| 5931545 | 7367948 | 1788971 | --- | --- | --- | 1,15 | up   |
| 5931569 | 7293646 | 1605413 | --- | --- | --- | 2,16 | down |
| 5931704 | 7160053 | 1275382 | --- | --- | --- | 1,24 | down |
| 5931714 | 7359453 | 1768454 | --- | --- | --- | 2,08 | down |
| 5931716 | 7331434 | 1699200 | --- | --- | --- | 1,32 | up   |
| 5931730 | 7225317 | 1435358 | --- | --- | --- | 1,33 | down |
| 5931863 | 7329846 | 1694987 | --- | --- | --- | 1,25 | down |
| 5932153 | 7376566 | 1812868 | --- | --- | --- | 1,51 | up   |
| 5932157 | 7297589 | 1615661 | --- | --- | --- | 1,11 | down |
| 5932274 | 7211363 | 1402043 | --- | --- | --- | 1,88 | down |
| 5932372 | 7132125 | 1206624 | --- | --- | --- | 1,09 | up   |
| 5932400 | 7069830 | 1055605 | --- | --- | --- | 1,27 | down |
| 5932424 | 7342356 | 1725893 | --- | --- | --- | 1,03 | up   |
| 5932429 | 7280743 | 1574541 | --- | --- | --- | 1,39 | up   |
| 5932495 | 7320850 | 1674403 | --- | --- | --- | 1,67 | up   |
| 5932553 | 7380497 | 1821833 | --- | --- | --- | 1,02 | up   |
| 5932671 | 7185622 | 1339218 | --- | --- | --- | 1,00 | up   |
| 5932731 | 7339379 | 1718343 | --- | --- | --- | 1,14 | up   |
| 5932774 | 7064732 | 1042910 | --- | --- | --- | 1,77 | down |
| 5932807 | 7243653 | 1482554 | --- | --- | --- | 1,19 | down |
| 5932910 | 7344406 | 1731186 | --- | --- | --- | 1,53 | down |
| 5933039 | 7313411 | 1655423 | --- | --- | --- | 1,16 | up   |
| 5933066 | 7319937 | 1672309 | --- | --- | --- | 1,10 | up   |
| 5933071 | 7307485 | 1641336 | --- | --- | --- | 1,69 | up   |
| 5933077 | 7053874 | 1018331 | --- | --- | --- | 1,89 | up   |
| 5933267 | 7080106 | 1079750 | --- | --- | --- | 1,21 | up   |
| 5933334 | 7076236 | 1071199 | --- | --- | --- | 1,14 | down |
| 5933446 | 7060851 | 1033426 | --- | --- | --- | 1,24 | up   |
| 5933470 | 7340990 | 1722516 | --- | --- | --- | 1,29 | down |
| 5933480 | 7088625 | 1099881 | --- | --- | --- | 1,36 | up   |
| 5933521 | 7340838 | 1722063 | --- | --- | --- | 1,03 | up   |
| 5933524 | 7118157 | 1172515 | --- | --- | --- | 1,10 | down |
| 5933533 | 7146245 | 1241349 | --- | --- | --- | 1,09 | up   |
| 5933577 | 7228520 | 1443766 | --- | --- | --- | 1,05 | down |
| 5933686 | 7059375 | 1030076 | --- | --- | --- | 1,03 | down |
| 5933737 | 7130889 | 1203866 | --- | --- | --- | 1,02 | down |
| 5933755 | 7231835 | 1452279 | --- | --- | --- | 1,20 | down |
| 5933761 | 7331719 | 1699913 | --- | --- | --- | 1,11 | up   |
| 5933767 | 7053874 | 1018348 | --- | --- | --- | 1,05 | down |
| 5933769 | 7247229 | 1490544 | --- | --- | --- | 1,44 | up   |
| 5933931 | 7071969 | 1060902 | --- | --- | --- | 1,30 | down |
| 5933975 | 7075445 | 1069352 | --- | --- | --- | 1,21 | down |
| 5933993 | 7277783 | 1567476 | --- | --- | --- | 1,28 | up   |
| 5934102 | 7233923 | 1458163 | --- | --- | --- | 1,61 | down |
| 5934111 | 7293402 | 1604807 | --- | --- | --- | 1,63 | up   |
| 5934172 | 7075445 | 1069352 | --- | --- | --- | 1,05 | down |

|         |         |         |     |     |     |      |      |
|---------|---------|---------|-----|-----|-----|------|------|
| 5934173 | 7112225 | 1157557 | --- | --- | --- | 1,11 | down |
| 5934240 | 7043535 | 994085  | --- | --- | --- | 1,30 | down |
| 5934250 | 7384365 | 1830277 | --- | --- | --- | 1,05 | down |
| 5934253 | 7161841 | 1279874 | --- | --- | --- | 1,36 | down |
| 5934317 | 7043535 | 994089  | --- | --- | --- | 1,07 | down |
| 5934463 | 7200129 | 1375996 | --- | --- | --- | 2,13 | down |
| 5934532 | 7199476 | 1374565 | --- | --- | --- | 1,11 | down |
| 5934533 | 7267802 | 1541816 | --- | --- | --- | 1,12 | down |
| 5934739 | 7203872 | 1384759 | --- | --- | --- | 1,15 | down |
| 5934773 | 7209927 | 1398916 | --- | --- | --- | 1,27 | down |
| 5934878 | 7376820 | 1813400 | --- | --- | --- | 1,06 | up   |
| 5934887 | 7176177 | 1315140 | --- | --- | --- | 1,42 | down |
| 5934942 | 7113483 | 1161020 | --- | --- | --- | 1,07 | up   |
| 5935003 | 7279881 | 1572746 | --- | --- | --- | 1,34 | up   |
| 5935130 | 7314270 | 1657753 | --- | --- | --- | 1,21 | up   |
| 5935140 | 7322388 | 1677319 | --- | --- | --- | 1,34 | down |
| 5935199 | 7267953 | 1542238 | --- | --- | --- | 1,86 | down |
| 5935253 | 7047865 | 1005354 | --- | --- | --- | 1,03 | up   |
| 5935265 | 7243647 | 1482487 | --- | --- | --- | 1,06 | up   |
| 5935278 | 7210263 | 1399761 | --- | --- | --- | 1,40 | down |
| 5935330 | 7198210 | 1371004 | --- | --- | --- | 1,49 | down |
| 5935349 | 7293402 | 1604692 | --- | --- | --- | 1,06 | down |
| 5935366 | 7279568 | 1572023 | --- | --- | --- | 1,49 | up   |
| 5935459 | 7056333 | 1023671 | --- | --- | --- | 1,51 | up   |
| 5935502 | 7086966 | 1095260 | --- | --- | --- | 1,29 | up   |
| 5935538 | 7132125 | 1206599 | --- | --- | --- | 1,56 | down |
| 5935556 | 7271128 | 1550316 | --- | --- | --- | 1,05 | down |
| 5935731 | 7297589 | 1615679 | --- | --- | --- | 1,07 | up   |
| 5935743 | 7339379 | 1718320 | --- | --- | --- | 1,00 | down |
| 5935778 | 7186688 | 1341844 | --- | --- | --- | 1,42 | up   |
| 5935947 | 7243603 | 1482288 | --- | --- | --- | 1,19 | up   |
| 5935979 | 7312250 | 1652646 | --- | --- | --- | 1,19 | down |
| 5936042 | 7165954 | 1288767 | --- | --- | --- | 1,29 | down |
| 5936057 | 7282343 | 1578668 | --- | --- | --- | 1,04 | down |
| 5936262 | 7365093 | 1781618 | --- | --- | --- | 1,08 | up   |
| 5936278 | 7339110 | 1717617 | --- | --- | --- | 1,50 | down |
| 5936320 | 7114108 | 1162443 | --- | --- | --- | 2,12 | down |
| 5936370 | 7294264 | 1606836 | --- | --- | --- | 1,07 | down |
| 5936386 | 7038316 | 981460  | --- | --- | --- | 1,20 | up   |
| 5936417 | 7346505 | 1736288 | --- | --- | --- | 1,24 | up   |
| 5936456 | 7175368 | 1313285 | --- | --- | --- | 1,12 | down |
| 5936550 | 7342414 | 1726093 | --- | --- | --- | 1,12 | down |
| 5936607 | 7099573 | 1126706 | --- | --- | --- | 1,17 | up   |
| 5936633 | 7321029 | 1674820 | --- | --- | --- | 1,35 | down |
| 5936690 | 7139708 | 1225051 | --- | --- | --- | 1,86 | down |
| 5936927 | 7318143 | 1668088 | --- | --- | --- | 1,76 | up   |
| 5937038 | 7323545 | 1679924 | --- | --- | --- | 1,70 | down |
| 5937259 | 7098366 | 1123614 | --- | --- | --- | 1,23 | down |
| 5937293 | 7053874 | 1018317 | --- | --- | --- | 1,01 | up   |
| 5937622 | 7038316 | 981460  | --- | --- | --- | 1,21 | down |
| 5937729 | 7070869 | 1058491 | --- | --- | --- | 1,06 | down |
| 5937779 | 7241163 | 1476819 | --- | --- | --- | 1,76 | up   |
| 5937792 | 7331829 | 1700180 | --- | --- | --- | 1,16 | down |
| 5937798 | 7301879 | 1626620 | --- | --- | --- | 1,60 | up   |
| 5937820 | 7327169 | 1688472 | --- | --- | --- | 1,11 | down |
| 5937843 | 7084993 | 1090683 | --- | --- | --- | 1,29 | down |



|         |         |         |     |     |     |      |      |
|---------|---------|---------|-----|-----|-----|------|------|
| 5937944 | 7131360 | 1204975 | --- | --- | --- | 1,02 | down |
| 5938107 | 7274780 | 1559182 | --- | --- | --- | 1,52 | up   |
| 5938236 | 7184850 | 1337601 | --- | --- | --- | 1,06 | down |
| 5938406 | 7213908 | 1407758 | --- | --- | --- | 1,27 | down |
| 5938565 | 7116103 | 1167608 | --- | --- | --- | 1,36 | up   |
| 5938568 | 7379492 | 1819698 | --- | --- | --- | 1,07 | down |
| 5938572 | 7186440 | 1341258 | --- | --- | --- | 1,17 | up   |
| 5938632 | 7240569 | 1475396 | --- | --- | --- | 1,00 | up   |
| 5938686 | 7156061 | 1265839 | --- | --- | --- | 1,06 | down |
| 5938701 | 7217650 | 1417171 | --- | --- | --- | 1,63 | up   |
| 5938726 | 7025652 | 950358  | --- | --- | --- | 1,03 | down |
| 5938742 | 7263152 | 1530381 | --- | --- | --- | 1,47 | up   |
| 5938760 | 7376566 | 1812866 | --- | --- | --- | 1,01 | down |
| 5938896 | 7233440 | 1456894 | --- | --- | --- | 1,11 | up   |
| 5938899 | 7050655 | 1011002 | --- | --- | --- | 1,19 | up   |
| 5938911 | 7043535 | 994098  | --- | --- | --- | 1,40 | down |
| 5938949 | 7243130 | 1480833 | --- | --- | --- | 1,14 | up   |
| 5939028 | 7384904 | 1831598 | --- | --- | --- | 1,32 | up   |
| 5939042 | 7163892 | 1284208 | --- | --- | --- | 1,02 | down |
| 5939208 | 7065110 | 1044143 | --- | --- | --- | 1,01 | up   |
| 5939264 | 7027797 | 956300  | --- | --- | --- | 1,77 | up   |
| 5939308 | 7112225 | 1157588 | --- | --- | --- | 1,09 | up   |
| 5939357 | 7341394 | 1723596 | --- | --- | --- | 1,29 | down |
| 5939374 | 7384509 | 1830744 | --- | --- | --- | 1,04 | down |
| 5939412 | 7040260 | 986052  | --- | --- | --- | 1,24 | down |
| 5939472 | 7344406 | 1731193 | --- | --- | --- | 1,03 | down |
| 5939484 | 7261592 | 1526858 | --- | --- | --- | 1,33 | up   |
| 5939578 | 7169732 | 1298758 | --- | --- | --- | 1,22 | down |
| 5939580 | 7236358 | 1464242 | --- | --- | --- | 1,54 | down |
| 5939625 | 7167507 | 1293118 | --- | --- | --- | 1,05 | up   |
| 5939641 | 7040260 | 986081  | --- | --- | --- | 1,25 | up   |
| 5939684 | 7363674 | 1778437 | --- | --- | --- | 1,22 | up   |
| 5939740 | 7199476 | 1374570 | --- | --- | --- | 1,32 | down |
| 5939864 | 7198210 | 1370960 | --- | --- | --- | 1,03 | down |
| 5939877 | 7129841 | 1200834 | --- | --- | --- | 1,04 | down |
| 5939897 | 7260613 | 1524275 | --- | --- | --- | 1,04 | down |
| 5939980 | 7236395 | 1464317 | --- | --- | --- | 1,03 | down |
| 5939999 | 7340838 | 1722090 | --- | --- | --- | 1,07 | down |
| 5940112 | 7340304 | 1720859 | --- | --- | --- | 1,73 | down |
| 5940125 | 7374842 | 1808986 | --- | --- | --- | 1,16 | up   |
| 5940157 | 7197056 | 1367844 | --- | --- | --- | 1,43 | down |
| 5940442 | 7102976 | 1135046 | --- | --- | --- | 1,05 | up   |
| 5940467 | 7329558 | 1694419 | --- | --- | --- | 2,28 | down |
| 5940628 | 7341397 | 1723639 | --- | --- | --- | 1,14 | up   |
| 5940663 | 7156061 | 1265835 | --- | --- | --- | 1,09 | up   |
| 5940727 | 7062529 | 1037855 | --- | --- | --- | 2,14 | down |
| 5940762 | 7337224 | 1712543 | --- | --- | --- | 1,25 | up   |
| 5940782 | 7157341 | 1269156 | --- | --- | --- | 1,01 | up   |
| 5940792 | 7032444 | 966766  | --- | --- | --- | 1,22 | down |
| 5940802 | 7197056 | 1367832 | --- | --- | --- | 2,28 | down |
| 5940873 | 7031774 | 964706  | --- | --- | --- | 1,21 | up   |
| 5940895 | 7287337 | 1589985 | --- | --- | --- | 1,84 | down |
| 5940910 | 7025652 | 950258  | --- | --- | --- | 1,16 | down |
| 5940953 | 7297154 | 1614241 | --- | --- | --- | 1,01 | down |
| 5940990 | 7033337 | 969494  | --- | --- | --- | 1,02 | up   |
| 5941050 | 7186464 | 1341371 | --- | --- | --- | 1,05 | up   |

|         |         |         |     |     |     |      |      |
|---------|---------|---------|-----|-----|-----|------|------|
| 5941068 | 7357815 | 1764157 | --- | --- | --- | 1,08 | down |
| 5941354 | 7243130 | 1480860 | --- | --- | --- | 1,23 | up   |
| 5941459 | 7380497 | 1821861 | --- | --- | --- | 1,53 | down |
| 5941503 | 7267802 | 1541788 | --- | --- | --- | 1,23 | up   |
| 5941525 | 7231650 | 1451849 | --- | --- | --- | 1,33 | down |
| 5941556 | 7236358 | 1464255 | --- | --- | --- | 1,34 | down |
| 5941563 | 7068259 | 1051649 | --- | --- | --- | 1,03 | up   |
| 5941603 | 7159642 | 1274199 | --- | --- | --- | 1,05 | down |
| 5941738 | 7213908 | 1407652 | --- | --- | --- | 1,21 | down |
| 5941747 | 7162144 | 1280501 | --- | --- | --- | 1,15 | up   |
| 5941780 | 7050726 | 1011254 | --- | --- | --- | 1,40 | up   |
| 5941917 | 7163227 | 1282816 | --- | --- | --- | 1,47 | down |
| 5941988 | 7350993 | 1747545 | --- | --- | --- | 1,13 | up   |
| 5941989 | 7120379 | 1178332 | --- | --- | --- | 2,10 | down |
| 5942111 | 7380019 | 1820830 | --- | --- | --- | 1,06 | down |
| 5942148 | 7063873 | 1040642 | --- | --- | --- | 1,30 | down |
| 5942342 | 7340838 | 1722089 | --- | --- | --- | 1,39 | down |
| 5942347 | 7197638 | 1369572 | --- | --- | --- | 1,31 | up   |
| 5942395 | 7274892 | 1559548 | --- | --- | --- | 1,04 | down |
| 5942400 | 7107926 | 1146840 | --- | --- | --- | 1,01 | down |
| 5942451 | 7188681 | 1346291 | --- | --- | --- | 1,30 | up   |
| 5942504 | 7052385 | 1014792 | --- | --- | --- | 1,45 | up   |
| 5942521 | 7119930 | 1177227 | --- | --- | --- | 1,00 | up   |
| 5942532 | 7231203 | 1450472 | --- | --- | --- | 1,10 | up   |
| 5942618 | 7198210 | 1370988 | --- | --- | --- | 1,61 | up   |
| 5942727 | 7240569 | 1475470 | --- | --- | --- | 1,01 | down |
| 5942851 | 7374143 | 1807009 | --- | --- | --- | 1,16 | down |
| 5942968 | 7189574 | 1348687 | --- | --- | --- | 1,50 | down |
| 5943018 | 7371677 | 1800755 | --- | --- | --- | 2,57 | up   |
| 5943036 | 7384509 | 1830721 | --- | --- | --- | 1,58 | down |
| 5943089 | 7243253 | 1481228 | --- | --- | --- | 2,06 | down |
| 5943126 | 7102708 | 1134316 | --- | --- | --- | 1,18 | down |
| 5943160 | 7243647 | 1482456 | --- | --- | --- | 1,04 | up   |
| 5943163 | 7284359 | 1583439 | --- | --- | --- | 1,01 | up   |
| 5943169 | 7116614 | 1168793 | --- | --- | --- | 1,89 | down |
| 5943185 | 7074989 | 1068380 | --- | --- | --- | 1,73 | down |
| 5943250 | 7239752 | 1473154 | --- | --- | --- | 1,28 | up   |
| 5943288 | 7357103 | 1762387 | --- | --- | --- | 1,44 | down |
| 5943331 | 7069253 | 1054170 | --- | --- | --- | 1,33 | down |
| 5943482 | 7189689 | 1349054 | --- | --- | --- | 1,06 | down |
| 5943543 | 7216994 | 1415187 | --- | --- | --- | 1,22 | up   |
| 5943773 | 7303616 | 1631349 | --- | --- | --- | 1,07 | up   |
| 5943785 | 7156978 | 1268176 | --- | --- | --- | 1,25 | down |
| 5943937 | 7361420 | 1773041 | --- | --- | --- | 1,09 | down |
| 5944010 | 7216994 | 1415186 | --- | --- | --- | 1,01 | up   |
| 5944046 | 7243603 | 1482279 | --- | --- | --- | 1,10 | down |
| 5944102 | 7217650 | 1417187 | --- | --- | --- | 1,17 | down |
| 5944145 | 7229886 | 1447172 | --- | --- | --- | 1,25 | down |
| 5944333 | 7217679 | 1417317 | --- | --- | --- | 1,07 | down |
| 5944342 | 7090278 | 1104135 | --- | --- | --- | 2,05 | up   |
| 5944373 | 7098867 | 1124948 | --- | --- | --- | 1,31 | up   |
| 5944457 | 7190534 | 1351230 | --- | --- | --- | 1,30 | down |
| 5944542 | 7338807 | 1716781 | --- | --- | --- | 1,07 | up   |
| 5944650 | 7345462 | 1733816 | --- | --- | --- | 1,14 | up   |
| 5944749 | 7321204 | 1675165 | --- | --- | --- | 1,02 | down |
| 5944831 | 7049399 | 1008363 | --- | --- | --- | 1,38 | down |

|         |         |         |     |     |     |      |      |
|---------|---------|---------|-----|-----|-----|------|------|
| 5944851 | 7243363 | 1481624 | --- | --- | --- | 1,10 | up   |
| 5944877 | 7331434 | 1699244 | --- | --- | --- | 1,39 | up   |
| 5944878 | 7287222 | 1589735 | --- | --- | --- | 1,16 | up   |
| 5944904 | 7206133 | 1389976 | --- | --- | --- | 1,21 | down |
| 5945012 | 7224166 | 1432661 | --- | --- | --- | 1,48 | up   |
| 5945048 | 7050557 | 1010789 | --- | --- | --- | 1,15 | up   |
| 5945367 | 7370843 | 1798382 | --- | --- | --- | 1,16 | up   |
| 5945405 | 7258520 | 1518883 | --- | --- | --- | 1,91 | up   |
| 5945440 | 7111573 | 1156014 | --- | --- | --- | 1,01 | up   |
| 5945478 | 7186106 | 1340501 | --- | --- | --- | 1,14 | up   |
| 5945494 | 7267953 | 1542230 | --- | --- | --- | 1,53 | down |
| 5945506 | 7363674 | 1778421 | --- | --- | --- | 1,05 | down |
| 5945521 | 7075424 | 1069283 | --- | --- | --- | 1,02 | down |
| 5945609 | 7277719 | 1567079 | --- | --- | --- | 1,14 | down |
| 5945651 | 7329846 | 1694993 | --- | --- | --- | 1,13 | down |
| 5945692 | 7075424 | 1069305 | --- | --- | --- | 1,35 | up   |
| 5945731 | 7117187 | 1170158 | --- | --- | --- | 1,03 | down |
| 5945812 | 7336931 | 1711860 | --- | --- | --- | 1,12 | down |
| 5945846 | 7144389 | 1236781 | --- | --- | --- | 1,02 | down |
| 5945864 | 7337224 | 1712606 | --- | --- | --- | 1,71 | up   |
| 5945912 | 7357890 | 1764389 | --- | --- | --- | 1,48 | up   |
| 5945941 | 7207758 | 1393826 | --- | --- | --- | 1,23 | up   |
| 5945963 | 7036412 | 976857  | --- | --- | --- | 1,29 | down |
| 5946013 | 7156052 | 1265784 | --- | --- | --- | 1,22 | down |
| 5946037 | 7186106 | 1340504 | --- | --- | --- | 1,28 | down |
| 5946116 | 7243653 | 1482528 | --- | --- | --- | 1,35 | up   |
| 5946187 | 7303616 | 1631355 | --- | --- | --- | 1,10 | down |
| 5946265 | 7143455 | 1234731 | --- | --- | --- | 1,18 | up   |
| 5946272 | 7067828 | 1050795 | --- | --- | --- | 1,14 | up   |
| 5946304 | 7337845 | 1714347 | --- | --- | --- | 1,50 | up   |
| 5946354 | 7342959 | 1727345 | --- | --- | --- | 1,26 | down |
| 5946358 | 7315571 | 1660971 | --- | --- | --- | 1,35 | up   |
| 5946399 | 7059584 | 1030550 | --- | --- | --- | 1,08 | up   |
| 5946432 | 7097525 | 1121059 | --- | --- | --- | 1,05 | down |
| 5946547 | 7180620 | 1326383 | --- | --- | --- | 1,38 | down |
| 5946572 | 7097680 | 1121742 | --- | --- | --- | 1,05 | up   |
| 5946601 | 7374740 | 1808627 | --- | --- | --- | 1,25 | up   |
| 5946775 | 7303616 | 1631356 | --- | --- | --- | 1,22 | up   |
| 5946853 | 7243253 | 1481232 | --- | --- | --- | 1,03 | down |
| 5946867 | 7087965 | 1098034 | --- | --- | --- | 1,35 | up   |
| 5946878 | 7068259 | 1051627 | --- | --- | --- | 1,41 | up   |
| 5946907 | 7364995 | 1781316 | --- | --- | --- | 1,27 | down |
| 5946991 | 7297589 | 1615663 | --- | --- | --- | 1,04 | down |
| 5947066 | 7156061 | 1265808 | --- | --- | --- | 1,15 | up   |
| 5947145 | 7287222 | 1589718 | --- | --- | --- | 1,13 | down |
| 5947152 | 7029770 | 960157  | --- | --- | --- | 1,15 | up   |
| 5947158 | 7308679 | 1644246 | --- | --- | --- | 1,01 | down |
| 5947165 | 7170764 | 1301472 | --- | --- | --- | 1,02 | down |
| 5947183 | 7244378 | 1484399 | --- | --- | --- | 1,09 | down |
| 5947212 | 7330659 | 1697060 | --- | --- | --- | 1,08 | up   |
| 5947235 | 7319065 | 1669983 | --- | --- | --- | 1,50 | down |
| 5947387 | 7340757 | 1721899 | --- | --- | --- | 1,47 | down |
| 5947413 | 7363674 | 1778440 | --- | --- | --- | 1,49 | up   |
| 5947709 | 7064224 | 1041782 | --- | --- | --- | 1,42 | down |
| 5947733 | 7168858 | 1296827 | --- | --- | --- | 1,01 | up   |
| 5947806 | 7368684 | 1791860 | --- | --- | --- | 1,52 | up   |

|         |         |         |     |     |     |      |      |
|---------|---------|---------|-----|-----|-----|------|------|
| 5947898 | 7243130 | 1480918 | --- | --- | --- | 1,11 | up   |
| 5948036 | 7172373 | 1305568 | --- | --- | --- | 1,07 | up   |
| 5948242 | 7312338 | 1652777 | --- | --- | --- | 1,41 | down |
| 5948502 | 7111573 | 1156019 | --- | --- | --- | 1,03 | down |
| 5948550 | 7350489 | 1746118 | --- | --- | --- | 1,70 | down |
| 5948553 | 7189689 | 1349048 | --- | --- | --- | 1,08 | up   |
| 5948592 | 7049399 | 1008338 | --- | --- | --- | 1,34 | down |
| 5948628 | 7086966 | 1095242 | --- | --- | --- | 1,17 | down |
| 5948698 | 7380497 | 1821866 | --- | --- | --- | 1,01 | down |
| 5948896 | 7279568 | 1572033 | --- | --- | --- | 1,76 | up   |
| 5948973 | 7098077 | 1122727 | --- | --- | --- | 1,34 | down |
| 5948996 | 7350237 | 1745496 | --- | --- | --- | 1,28 | down |
| 5949015 | 7039308 | 983908  | --- | --- | --- | 1,31 | down |
| 5949024 | 7241136 | 1476726 | --- | --- | --- | 1,01 | down |
| 5949207 | 7230611 | 1448823 | --- | --- | --- | 1,61 | up   |
| 5949223 | 7285897 | 1586638 | --- | --- | --- | 1,20 | up   |
| 5949299 | 7108345 | 1148075 | --- | --- | --- | 1,48 | down |
| 5949313 | 7330396 | 1696372 | --- | --- | --- | 1,03 | down |
| 5949344 | 7152974 | 1257656 | --- | --- | --- | 1,12 | up   |
| 5949351 | 7096898 | 1119520 | --- | --- | --- | 1,02 | down |
| 5949417 | 7280743 | 1574561 | --- | --- | --- | 1,26 | up   |
| 5949425 | 7297589 | 1615621 | --- | --- | --- | 1,19 | down |
| 5949444 | 7065110 | 1044147 | --- | --- | --- | 1,33 | up   |
| 5949512 | 7112225 | 1157567 | --- | --- | --- | 1,01 | up   |
| 5949584 | 7240569 | 1475304 | --- | --- | --- | 1,11 | up   |
| 5949623 | 7027759 | 956129  | --- | --- | --- | 1,57 | down |
| 5949694 | 7320337 | 1673336 | --- | --- | --- | 1,07 | down |
| 5949813 | 7043379 | 993638  | --- | --- | --- | 2,00 | up   |
| 5949929 | 7363674 | 1778421 | --- | --- | --- | 2,05 | up   |
| 5949938 | 7331434 | 1699238 | --- | --- | --- | 1,01 | down |
| 5950014 | 7238252 | 1469133 | --- | --- | --- | 1,04 | down |
| 5950066 | 7360325 | 1770511 | --- | --- | --- | 1,23 | up   |
| 5950076 | 7279586 | 1572074 | --- | --- | --- | 1,01 | up   |
| 5950234 | 7110330 | 1152890 | --- | --- | --- | 2,35 | down |
| 5950335 | 7166497 | 1290372 | --- | --- | --- | 1,46 | up   |
| 5950439 | 7260613 | 1524269 | --- | --- | --- | 1,08 | down |
| 5950502 | 7363674 | 1778430 | --- | --- | --- | 1,13 | down |
| 5950535 | 7071714 | 1060355 | --- | --- | --- | 1,05 | up   |
| 5950671 | 7189689 | 1349033 | --- | --- | --- | 1,09 | down |
| 5950718 | 7307424 | 1641141 | --- | --- | --- | 1,13 | up   |
| 5950891 | 7244288 | 1484128 | --- | --- | --- | 1,35 | down |
| 5950906 | 7370001 | 1795759 | --- | --- | --- | 1,02 | down |
| 5950956 | 7286807 | 1588775 | --- | --- | --- | 1,64 | down |
| 5950998 | 7052385 | 1014804 | --- | --- | --- | 1,62 | down |
| 5951019 | 7350993 | 1747526 | --- | --- | --- | 1,20 | up   |
| 5951159 | 7064905 | 1043438 | --- | --- | --- | 1,08 | down |
| 5951223 | 7064732 | 1042933 | --- | --- | --- | 2,11 | down |
| 5951255 | 7131360 | 1204971 | --- | --- | --- | 1,45 | down |
| 5951278 | 7148271 | 1246645 | --- | --- | --- | 1,08 | down |
| 5951347 | 7370128 | 1796169 | --- | --- | --- | 1,65 | down |
| 5951365 | 7033672 | 970361  | --- | --- | --- | 1,11 | up   |
| 5951396 | 7338807 | 1716821 | --- | --- | --- | 1,25 | up   |
| 5951460 | 7156061 | 1265839 | --- | --- | --- | 1,05 | up   |
| 5951482 | 7236358 | 1464264 | --- | --- | --- | 1,36 | up   |
| 5951485 | 7361420 | 1773055 | --- | --- | --- | 1,01 | down |
| 5951490 | 7303616 | 1631351 | --- | --- | --- | 1,12 | up   |

|         |         |         |     |     |     |      |      |
|---------|---------|---------|-----|-----|-----|------|------|
| 5951573 | 7098126 | 1122983 | --- | --- | --- | 1,77 | down |
| 5951611 | 7056304 | 1023603 | --- | --- | --- | 1,25 | up   |
| 5951711 | 7373678 | 1805871 | --- | --- | --- | 1,11 | up   |
| 5951863 | 7359551 | 1768623 | --- | --- | --- | 1,27 | up   |
| 5952007 | 7358859 | 1766972 | --- | --- | --- | 1,09 | up   |
| 5952079 | 7147809 | 1245466 | --- | --- | --- | 1,11 | down |
| 5952083 | 7233440 | 1456902 | --- | --- | --- | 1,98 | down |
| 5952226 | 7349643 | 1744191 | --- | --- | --- | 1,63 | down |
| 5952227 | 7369129 | 1793291 | --- | --- | --- | 1,59 | down |
| 5952294 | 7150631 | 1252185 | --- | --- | --- | 1,08 | up   |
| 5952435 | 7060851 | 1033408 | --- | --- | --- | 1,15 | up   |
| 5952443 | 7337845 | 1714343 | --- | --- | --- | 1,06 | up   |
| 5952545 | 7240569 | 1475447 | --- | --- | --- | 1,11 | up   |
| 5952564 | 7351951 | 1749854 | --- | --- | --- | 2,44 | down |
| 5952594 | 7234040 | 1458504 | --- | --- | --- | 1,89 | up   |
| 5952600 | 7078666 | 1076529 | --- | --- | --- | 1,22 | up   |
| 5952629 | 7330238 | 1695927 | --- | --- | --- | 1,13 | down |
| 5952670 | 7239939 | 1473785 | --- | --- | --- | 1,12 | down |
| 5952702 | 7243130 | 1480942 | --- | --- | --- | 1,12 | down |
| 5952749 | 7162959 | 1282089 | --- | --- | --- | 1,07 | up   |
| 5952896 | 7336250 | 1710171 | --- | --- | --- | 1,64 | down |
| 5952924 | 7219605 | 1422078 | --- | --- | --- | 1,06 | down |
| 5952930 | 7037235 | 978573  | --- | --- | --- | 1,11 | up   |
| 5953005 | 7042382 | 991289  | --- | --- | --- | 1,26 | down |
| 5953006 | 7032204 | 966154  | --- | --- | --- | 1,68 | down |
| 5953268 | 7313411 | 1655447 | --- | --- | --- | 1,56 | up   |
| 5953270 | 7230611 | 1448801 | --- | --- | --- | 1,10 | down |
| 5953504 | 7032204 | 966173  | --- | --- | --- | 1,03 | down |
| 5953532 | 7024628 | 947422  | --- | --- | --- | 1,02 | down |
| 5953547 | 7297589 | 1615623 | --- | --- | --- | 1,15 | up   |
| 5953553 | 7307721 | 1641993 | --- | --- | --- | 1,27 | up   |
| 5953576 | 7094139 | 1112914 | --- | --- | --- | 1,01 | down |
| 5953625 | 7038530 | 981872  | --- | --- | --- | 1,02 | up   |
| 5953661 | 7274780 | 1559217 | --- | --- | --- | 2,39 | down |
| 5953795 | 7261592 | 1526843 | --- | --- | --- | 1,03 | down |
| 5953902 | 7181105 | 1327967 | --- | --- | --- | 1,25 | up   |
| 5953978 | 7132125 | 1206633 | --- | --- | --- | 1,02 | down |
| 5954043 | 7331297 | 1698819 | --- | --- | --- | 1,00 | up   |
| 5954111 | 7052813 | 1015930 | --- | --- | --- | 1,14 | down |
| 5954129 | 7279568 | 1572034 | --- | --- | --- | 1,14 | up   |
| 5954135 | 7181105 | 1327967 | --- | --- | --- | 1,42 | down |
| 5954150 | 7086966 | 1095274 | --- | --- | --- | 1,01 | down |
| 5954190 | 7178060 | 1320153 | --- | --- | --- | 1,67 | up   |
| 5954319 | 7346066 | 1735313 | --- | --- | --- | 1,04 | up   |
| 5954374 | 7314270 | 1657723 | --- | --- | --- | 1,01 | down |
| 5954379 | 7287222 | 1589736 | --- | --- | --- | 1,00 | up   |
| 5954443 | 7038669 | 982184  | --- | --- | --- | 1,07 | down |
| 5954506 | 7049399 | 1008397 | --- | --- | --- | 1,47 | down |
| 5954545 | 7028624 | 957994  | --- | --- | --- | 1,04 | up   |
| 5954554 | 7341002 | 1722552 | --- | --- | --- | 1,05 | up   |
| 5954557 | 7041609 | 989560  | --- | --- | --- | 1,23 | down |
| 5954558 | 7072552 | 1062144 | --- | --- | --- | 1,01 | down |
| 5954669 | 7149817 | 1250310 | --- | --- | --- | 4,61 | down |
| 5954792 | 7315206 | 1660026 | --- | --- | --- | 1,03 | down |
| 5954804 | 7239752 | 1473180 | --- | --- | --- | 1,02 | up   |
| 5954818 | 7307721 | 1642004 | --- | --- | --- | 1,08 | down |

|         |         |         |     |     |     |      |      |
|---------|---------|---------|-----|-----|-----|------|------|
| 5954915 | 7312627 | 1653488 | --- | --- | --- | 1,27 | down |
| 5955024 | 7373633 | 1805714 | --- | --- | --- | 1,12 | down |
| 5955028 | 7332059 | 1700727 | --- | --- | --- | 1,49 | up   |
| 5955106 | 7338807 | 1716813 | --- | --- | --- | 1,12 | up   |
| 5955121 | 7139026 | 1223493 | --- | --- | --- | 1,15 | up   |
| 5955237 | 7361042 | 1772258 | --- | --- | --- | 1,04 | up   |
| 5955341 | 7244290 | 1484153 | --- | --- | --- | 1,11 | down |
| 5955364 | 7092965 | 1110168 | --- | --- | --- | 1,11 | up   |
| 5955393 | 7217679 | 1417291 | --- | --- | --- | 1,41 | down |
| 5955422 | 7088625 | 1099866 | --- | --- | --- | 1,28 | down |
| 5955428 | 7092965 | 1110200 | --- | --- | --- | 1,51 | down |
| 5955431 | 7233012 | 1455413 | --- | --- | --- | 1,02 | down |
| 5955489 | 7307721 | 1641985 | --- | --- | --- | 1,24 | down |
| 5955503 | 7243098 | 1480751 | --- | --- | --- | 1,07 | up   |
| 5955519 | 7156061 | 1265837 | --- | --- | --- | 1,01 | down |
| 5955522 | 7052813 | 1015900 | --- | --- | --- | 1,05 | up   |
| 5955558 | 7139708 | 1225058 | --- | --- | --- | 1,64 | up   |
| 5955643 | 7255522 | 1511454 | --- | --- | --- | 2,33 | up   |
| 5955683 | 7320337 | 1673324 | --- | --- | --- | 1,05 | down |
| 5955806 | 7156978 | 1268177 | --- | --- | --- | 1,11 | down |
| 5955849 | 7274780 | 1559253 | --- | --- | --- | 1,07 | down |
| 5955923 | 7195903 | 1365330 | --- | --- | --- | 1,19 | down |
| 5956012 | 7229886 | 1447143 | --- | --- | --- | 1,01 | down |
| 5956061 | 7217747 | 1417488 | --- | --- | --- | 1,26 | down |
| 5956129 | 7086522 | 1093957 | --- | --- | --- | 2,77 | down |
| 5956331 | 7342356 | 1725892 | --- | --- | --- | 1,75 | up   |
| 5956394 | 7172988 | 1307332 | --- | --- | --- | 1,18 | up   |
| 5956561 | 7341546 | 1723944 | --- | --- | --- | 1,05 | up   |
| 5956580 | 7344530 | 1731572 | --- | --- | --- | 1,02 | up   |
| 5956594 | 7368684 | 1791856 | --- | --- | --- | 1,51 | up   |
| 5956647 | 7231152 | 1450276 | --- | --- | --- | 1,80 | up   |
| 5956658 | 7142081 | 1230948 | --- | --- | --- | 1,24 | down |
| 5956714 | 7092549 | 1109177 | --- | --- | --- | 1,31 | down |
| 5956745 | 7097485 | 1120949 | --- | --- | --- | 1,48 | up   |
| 5956879 | 7341397 | 1723625 | --- | --- | --- | 1,01 | up   |
| 5957018 | 7211363 | 1402040 | --- | --- | --- | 1,11 | down |
| 5957020 | 7368729 | 1792053 | --- | --- | --- | 1,61 | up   |
| 5957022 | 7062927 | 1038650 | --- | --- | --- | 1,14 | down |
| 5957038 | 7234040 | 1458482 | --- | --- | --- | 1,21 | up   |
| 5957055 | 7199476 | 1374524 | --- | --- | --- | 1,81 | down |
| 5957064 | 7235069 | 1460976 | --- | --- | --- | 1,26 | down |
| 5957106 | 7279568 | 1572008 | --- | --- | --- | 1,07 | up   |
| 5957120 | 7268375 | 1543446 | --- | --- | --- | 1,13 | down |
| 5957193 | 7060851 | 1033425 | --- | --- | --- | 1,63 | down |
| 5957270 | 7092965 | 1110175 | --- | --- | --- | 1,14 | up   |
| 5957334 | 7380019 | 1820828 | --- | --- | --- | 1,30 | down |
| 5957390 | 7102369 | 1133428 | --- | --- | --- | 1,10 | up   |
| 5957429 | 7172373 | 1305565 | --- | --- | --- | 1,33 | down |
| 5957564 | 7103811 | 1137067 | --- | --- | --- | 1,21 | up   |
| 5957730 | 7277719 | 1567095 | --- | --- | --- | 1,05 | up   |
| 5957776 | 7094130 | 1112872 | --- | --- | --- | 1,13 | down |
| 5957808 | 7263152 | 1530361 | --- | --- | --- | 1,20 | up   |
| 5957924 | 7340757 | 1721905 | --- | --- | --- | 1,05 | down |
| 5957984 | 7373658 | 1805796 | --- | --- | --- | 1,44 | down |
| 5958000 | 7363674 | 1778440 | --- | --- | --- | 1,30 | down |
| 5958048 | 7083030 | 1086262 | --- | --- | --- | 1,03 | down |

|         |         |         |     |     |     |      |      |
|---------|---------|---------|-----|-----|-----|------|------|
| 5958605 | 7341253 | 1723263 | --- | --- | --- | 1,01 | down |
| 5958668 | 7338807 | 1716823 | --- | --- | --- | 1,19 | up   |
| 5958683 | 7155624 | 1264725 | --- | --- | --- | 1,00 | up   |
| 5958717 | 7062436 | 1037709 | --- | --- | --- | 1,04 | down |
| 5958770 | 7193987 | 1360667 | --- | --- | --- | 1,54 | down |
| 5958900 | 7041609 | 989558  | --- | --- | --- | 1,34 | down |
| 5958987 | 7088164 | 1098471 | --- | --- | --- | 1,10 | up   |
| 5959039 | 7301900 | 1626739 | --- | --- | --- | 1,00 | up   |
| 5959128 | 7372840 | 1803780 | --- | --- | --- | 1,87 | up   |
| 5959138 | 7114108 | 1162443 | --- | --- | --- | 1,31 | up   |
| 5959241 | 7350489 | 1746119 | --- | --- | --- | 1,45 | up   |
| 5959273 | 7322020 | 1676650 | --- | --- | --- | 1,14 | up   |
| 5959288 | 7336250 | 1710171 | --- | --- | --- | 1,99 | up   |
| 5959331 | 7189574 | 1348690 | --- | --- | --- | 1,39 | up   |
| 5959454 | 7052567 | 1015258 | --- | --- | --- | 1,03 | up   |
| 5959521 | 7162177 | 1280583 | --- | --- | --- | 1,33 | up   |
| 5959523 | 7350237 | 1745483 | --- | --- | --- | 1,33 | down |
| 5959536 | 7247848 | 1492058 | --- | --- | --- | 1,56 | down |
| 5959773 | 7340990 | 1722501 | --- | --- | --- | 1,01 | down |
| 5959918 | 7337224 | 1712615 | --- | --- | --- | 1,21 | up   |
| 5959979 | 7139708 | 1225068 | --- | --- | --- | 1,04 | up   |
| 5960009 | 7142081 | 1230986 | --- | --- | --- | 1,79 | down |
| 5960161 | 7264274 | 1533174 | --- | --- | --- | 1,42 | down |
| 5960199 | 7297589 | 1615634 | --- | --- | --- | 1,21 | up   |
| 5960280 | 7086966 | 1095289 | --- | --- | --- | 1,52 | down |
| 5960283 | 7367262 | 1786892 | --- | --- | --- | 1,95 | down |
| 5960313 | 7087965 | 1098063 | --- | --- | --- | 1,05 | up   |
| 5960389 | 7188685 | 1346304 | --- | --- | --- | 1,17 | up   |
| 5960458 | 7286807 | 1588781 | --- | --- | --- | 1,12 | up   |
| 5960514 | 7373417 | 1805090 | --- | --- | --- | 1,08 | up   |
| 5960561 | 7243363 | 1481623 | --- | --- | --- | 1,90 | down |
| 5960929 | 7360325 | 1770560 | --- | --- | --- | 1,78 | up   |
| 5960938 | 7350489 | 1746112 | --- | --- | --- | 1,26 | up   |
| 5961010 | 7070869 | 1058491 | --- | --- | --- | 1,01 | down |
| 5961075 | 7150348 | 1251418 | --- | --- | --- | 1,01 | up   |
| 5961122 | 7243603 | 1482290 | --- | --- | --- | 1,08 | up   |
| 5961144 | 7131103 | 1204322 | --- | --- | --- | 2,89 | down |
| 5961159 | 7049399 | 1008374 | --- | --- | --- | 1,01 | up   |
| 5961198 | 7197056 | 1367846 | --- | --- | --- | 1,21 | down |
| 5961341 | 7357890 | 1764389 | --- | --- | --- | 1,51 | down |
| 5961409 | 7368004 | 1789336 | --- | --- | --- | 1,26 | down |
| 5961432 | 7384509 | 1830728 | --- | --- | --- | 1,07 | down |
| 5961461 | 7172373 | 1305582 | --- | --- | --- | 1,02 | up   |
| 5961496 | 7112225 | 1157563 | --- | --- | --- | 1,27 | up   |
| 5961548 | 7112225 | 1157554 | --- | --- | --- | 1,01 | down |
| 5961556 | 7115880 | 1166838 | --- | --- | --- | 1,24 | down |
| 5961573 | 7326322 | 1686608 | --- | --- | --- | 1,18 | up   |
| 5961598 | 7307721 | 1641992 | --- | --- | --- | 1,11 | down |
| 5961704 | 7280743 | 1574476 | --- | --- | --- | 1,06 | up   |
| 5961898 | 7123357 | 1185595 | --- | --- | --- | 2,17 | down |
| 5961909 | 7332059 | 1700731 | --- | --- | --- | 1,24 | up   |
| 5961938 | 7132125 | 1206627 | --- | --- | --- | 1,22 | down |
| 5962032 | 7183182 | 1333551 | --- | --- | --- | 1,13 | down |
| 5962191 | 7193056 | 1358253 | --- | --- | --- | 1,16 | down |
| 5962218 | 7212735 | 1405027 | --- | --- | --- | 1,01 | up   |
| 5962259 | 7089381 | 1102066 | --- | --- | --- | 1,46 | down |

|         |         |         |     |     |     |      |      |
|---------|---------|---------|-----|-----|-----|------|------|
| 5962322 | 7088164 | 1098464 | --- | --- | --- | 1,77 | up   |
| 5962338 | 7279881 | 1572714 | --- | --- | --- | 1,18 | up   |
| 5962492 | 7040260 | 986078  | --- | --- | --- | 1,04 | up   |
| 5962530 | 7027795 | 956273  | --- | --- | --- | 1,53 | down |
| 5962655 | 7148978 | 1248546 | --- | --- | --- | 1,20 | down |
| 5962772 | 7327169 | 1688441 | --- | --- | --- | 1,29 | up   |
| 5962798 | 7120827 | 1179339 | --- | --- | --- | 1,16 | down |
| 5962967 | 7101643 | 1131574 | --- | --- | --- | 1,03 | down |
| 5963020 | 7034293 | 971990  | --- | --- | --- | 1,18 | down |
| 5963103 | 7287337 | 1589995 | --- | --- | --- | 1,32 | down |
| 5963146 | 7359551 | 1768621 | --- | --- | --- | 1,06 | up   |
| 5963168 | 7130889 | 1203884 | --- | --- | --- | 1,07 | up   |
| 5963259 | 7174149 | 1310527 | --- | --- | --- | 1,13 | down |
| 5963296 | 7271828 | 1552288 | --- | --- | --- | 1,03 | down |
| 5963332 | 7086522 | 1093952 | --- | --- | --- | 1,33 | up   |
| 5963388 | 7363674 | 1778409 | --- | --- | --- | 1,04 | down |
| 5963428 | 7267802 | 1541841 | --- | --- | --- | 1,25 | up   |
| 5963509 | 7276231 | 1563085 | --- | --- | --- | 1,05 | down |
| 5963615 | 7107926 | 1146831 | --- | --- | --- | 1,00 | down |
| 5963797 | 7049399 | 1008413 | --- | --- | --- | 1,04 | up   |
| 5963962 | 7339379 | 1718318 | --- | --- | --- | 1,45 | down |
| 5964120 | 7088164 | 1098461 | --- | --- | --- | 1,19 | up   |
| 5964294 | 7232340 | 1453533 | --- | --- | --- | 1,07 | up   |
| 5964375 | 7115362 | 1165592 | --- | --- | --- | 1,19 | down |
| 5964382 | 7218259 | 1418805 | --- | --- | --- | 1,17 | down |
| 5964389 | 7198210 | 1370978 | --- | --- | --- | 1,06 | up   |
| 5964450 | 7339110 | 1717605 | --- | --- | --- | 1,16 | up   |
| 5964463 | 7231203 | 1450399 | --- | --- | --- | 1,17 | down |
| 5964482 | 7266838 | 1538999 | --- | --- | --- | 2,48 | down |
| 5964483 | 7337260 | 1712805 | --- | --- | --- | 1,26 | up   |
| 5964645 | 7360486 | 1770971 | --- | --- | --- | 1,02 | up   |
| 5964663 | 7148978 | 1248454 | --- | --- | --- | 1,05 | down |
| 5964693 | 7107926 | 1146839 | --- | --- | --- | 1,15 | down |
| 5964722 | 7193056 | 1358287 | --- | --- | --- | 1,06 | up   |
| 5964767 | 7325674 | 1685227 | --- | --- | --- | 1,12 | down |
| 5964796 | 7116614 | 1168792 | --- | --- | --- | 1,08 | up   |
| 5964831 | 7255663 | 1511726 | --- | --- | --- | 1,23 | up   |
| 5964963 | 7253408 | 1505933 | --- | --- | --- | 1,10 | up   |
| 5964992 | 7153571 | 1259032 | --- | --- | --- | 1,51 | up   |
| 5965048 | 7065266 | 1044582 | --- | --- | --- | 1,08 | up   |
| 5965260 | 7068259 | 1051593 | --- | --- | --- | 1,04 | down |
| 5965460 | 7110330 | 1152921 | --- | --- | --- | 2,34 | up   |
| 5965586 | 7186464 | 1341368 | --- | --- | --- | 1,13 | up   |
| 5965748 | 7198210 | 1370971 | --- | --- | --- | 1,14 | down |
| 5965761 | 7087965 | 1098062 | --- | --- | --- | 1,27 | down |
| 5965935 | 7239752 | 1473171 | --- | --- | --- | 1,03 | up   |
| 5965960 | 7281950 | 1577781 | --- | --- | --- | 1,35 | up   |
| 5966040 | 7069830 | 1055613 | --- | --- | --- | 1,08 | up   |
| 5966065 | 7153571 | 1259034 | --- | --- | --- | 2,04 | up   |
| 5966086 | 7156052 | 1265760 | --- | --- | --- | 1,07 | down |
| 5966229 | 7303616 | 1631387 | --- | --- | --- | 1,07 | down |
| 5966426 | 7384073 | 1829456 | --- | --- | --- | 1,52 | up   |
| 5966511 | 7316452 | 1663564 | --- | --- | --- | 1,03 | down |
| 5966528 | 7180620 | 1326387 | --- | --- | --- | 1,31 | down |
| 5966590 | 7050065 | 1009550 | --- | --- | --- | 1,36 | down |
| 5966633 | 7193056 | 1358289 | --- | --- | --- | 1,07 | up   |



|         |         |         |     |     |     |      |      |
|---------|---------|---------|-----|-----|-----|------|------|
| 5966708 | 7354688 | 1756375 | --- | --- | --- | 1,00 | up   |
| 5966810 | 7156052 | 1265780 | --- | --- | --- | 1,34 | up   |
| 5966999 | 7365183 | 1781905 | --- | --- | --- | 1,17 | down |
| 5967110 | 7069830 | 1055605 | --- | --- | --- | 1,19 | up   |
| 5967185 | 7061550 | 1035285 | --- | --- | --- | 1,55 | up   |
| 5967188 | 7371446 | 1800082 | --- | --- | --- | 1,33 | up   |
| 5967259 | 7384509 | 1830734 | --- | --- | --- | 1,07 | up   |
| 5967265 | 7142081 | 1230959 | --- | --- | --- | 1,89 | down |
| 5967267 | 7351951 | 1749839 | --- | --- | --- | 1,14 | down |
| 5967364 | 7344702 | 1732140 | --- | --- | --- | 1,15 | down |
| 5967380 | 7193056 | 1358281 | --- | --- | --- | 1,20 | down |
| 5967498 | 7193513 | 1359444 | --- | --- | --- | 1,08 | up   |
| 5967520 | 7169599 | 1298443 | --- | --- | --- | 1,03 | up   |
| 5967558 | 7032618 | 967329  | --- | --- | --- | 1,01 | up   |
| 5967591 | 7247228 | 1490522 | --- | --- | --- | 1,20 | up   |
| 5967650 | 7069830 | 1055640 | --- | --- | --- | 1,01 | up   |
| 5967662 | 7323545 | 1679927 | --- | --- | --- | 1,60 | up   |
| 5967881 | 7333152 | 1702957 | --- | --- | --- | 2,35 | up   |
| 5968135 | 7291129 | 1599597 | --- | --- | --- | 1,14 | up   |
| 5968224 | 7034293 | 971885  | --- | --- | --- | 1,29 | down |
| 5968226 | 7108551 | 1148707 | --- | --- | --- | 1,10 | down |
| 5968252 | 7303616 | 1631312 | --- | --- | --- | 1,11 | down |
| 5968265 | 7039265 | 983656  | --- | --- | --- | 1,03 | up   |
| 5968332 | 7243647 | 1482452 | --- | --- | --- | 1,01 | up   |
| 5968461 | 7369031 | 1793014 | --- | --- | --- | 1,19 | down |
| 5968519 | 7144088 | 1236177 | --- | --- | --- | 1,12 | up   |
| 5968552 | 7295410 | 1609733 | --- | --- | --- | 1,23 | up   |
| 5968554 | 7029078 | 958879  | --- | --- | --- | 1,33 | down |
| 5968637 | 7159642 | 1274198 | --- | --- | --- | 1,55 | up   |
| 5968683 | 7308679 | 1644252 | --- | --- | --- | 1,66 | up   |
| 5968739 | 7131764 | 1205853 | --- | --- | --- | 1,06 | up   |
| 5968785 | 7364346 | 1780005 | --- | --- | --- | 1,35 | up   |
| 5968834 | 7105375 | 1140970 | --- | --- | --- | 1,20 | down |
| 5968930 | 7376820 | 1813414 | --- | --- | --- | 1,09 | up   |
| 5969028 | 7195903 | 1365331 | --- | --- | --- | 1,65 | up   |
| 5969056 | 7114108 | 1162458 | --- | --- | --- | 1,37 | up   |
| 5969287 | 7159642 | 1274219 | --- | --- | --- | 2,11 | down |
| 5969311 | 7040260 | 986072  | --- | --- | --- | 1,31 | down |
| 5969357 | 7052813 | 1015929 | --- | --- | --- | 2,43 | up   |
| 5969490 | 7341253 | 1723269 | --- | --- | --- | 1,60 | up   |
| 5969588 | 7303616 | 1631314 | --- | --- | --- | 1,18 | up   |
| 5969672 | 7257976 | 1517712 | --- | --- | --- | 1,49 | down |
| 5969683 | 7201217 | 1378762 | --- | --- | --- | 1,03 | down |
| 5969857 | 7070869 | 1058502 | --- | --- | --- | 1,22 | up   |
| 5969901 | 7266532 | 1538297 | --- | --- | --- | 1,27 | up   |
| 5969912 | 7370475 | 1797139 | --- | --- | --- | 1,08 | up   |
| 5969939 | 7373417 | 1805098 | --- | --- | --- | 1,09 | up   |
| 5970072 | 7148978 | 1248495 | --- | --- | --- | 1,24 | down |
| 5970096 | 7342356 | 1725900 | --- | --- | --- | 1,55 | up   |
| 5970224 | 7291032 | 1599340 | --- | --- | --- | 1,01 | up   |
| 5970342 | 7031576 | 964112  | --- | --- | --- | 1,13 | down |
| 5970365 | 7299512 | 1620554 | --- | --- | --- | 1,49 | down |
| 5970392 | 7263152 | 1530360 | --- | --- | --- | 1,04 | up   |
| 5970405 | 7067828 | 1050785 | --- | --- | --- | 2,01 | up   |
| 5970479 | 7117158 | 1170034 | --- | --- | --- | 1,37 | down |
| 5970512 | 7060851 | 1033356 | --- | --- | --- | 1,15 | down |

|         |         |         |     |     |     |      |      |
|---------|---------|---------|-----|-----|-----|------|------|
| 5970690 | 7243647 | 1482464 | --- | --- | --- | 1,20 | up   |
| 5970692 | 7340757 | 1721908 | --- | --- | --- | 1,08 | down |
| 5970693 | 7166439 | 1290101 | --- | --- | --- | 1,90 | up   |
| 5970722 | 7131764 | 1205858 | --- | --- | --- | 1,20 | down |
| 5970752 | 7319259 | 1670403 | --- | --- | --- | 1,43 | up   |
| 5970787 | 7153571 | 1259039 | --- | --- | --- | 1,07 | up   |
| 5970801 | 7247848 | 1492070 | --- | --- | --- | 1,29 | up   |
| 5970869 | 7381352 | 1823742 | --- | --- | --- | 1,23 | down |
| 5970879 | 7229886 | 1447160 | --- | --- | --- | 1,25 | up   |
| 5970929 | 7040260 | 986089  | --- | --- | --- | 1,14 | down |
| 5970947 | 7339387 | 1718375 | --- | --- | --- | 1,17 | down |
| 5970963 | 7038610 | 982077  | --- | --- | --- | 1,18 | down |
| 5970966 | 7264085 | 1532718 | --- | --- | --- | 1,41 | down |
| 5971031 | 7151063 | 1253071 | --- | --- | --- | 1,68 | up   |
| 5971118 | 7117187 | 1170161 | --- | --- | --- | 1,02 | up   |
| 5971145 | 7253272 | 1505547 | --- | --- | --- | 1,15 | down |
| 5971172 | 7267802 | 1541837 | --- | --- | --- | 1,34 | down |
| 5971197 | 7099030 | 1125342 | --- | --- | --- | 2,09 | down |
| 5971319 | 7092549 | 1109184 | --- | --- | --- | 1,17 | down |
| 5971542 | 7201217 | 1378765 | --- | --- | --- | 1,08 | up   |
| 5971604 | 7074132 | 1066324 | --- | --- | --- | 1,22 | up   |
| 5971714 | 7068073 | 1051176 | --- | --- | --- | 1,01 | down |
| 5971847 | 7289382 | 1595198 | --- | --- | --- | 1,31 | up   |
| 5971938 | 7095262 | 1115650 | --- | --- | --- | 2,16 | up   |
| 5972005 | 7258545 | 1518926 | --- | --- | --- | 1,08 | down |
| 5972020 | 7352044 | 1750008 | --- | --- | --- | 1,24 | up   |
| 5972077 | 7092965 | 1110158 | --- | --- | --- | 1,02 | down |
| 5972118 | 7267802 | 1541754 | --- | --- | --- | 1,05 | up   |
| 5972149 | 7193513 | 1359467 | --- | --- | --- | 1,28 | up   |
| 5972181 | 7297589 | 1615677 | --- | --- | --- | 1,02 | up   |
| 5972192 | 7217679 | 1417319 | --- | --- | --- | 1,05 | up   |
| 5972195 | 7203872 | 1384777 | --- | --- | --- | 1,06 | down |
| 5972213 | 7031774 | 964762  | --- | --- | --- | 1,02 | down |
| 5972223 | 7073928 | 1065804 | --- | --- | --- | 8,15 | down |
| 5972263 | 7115362 | 1165595 | --- | --- | --- | 1,03 | up   |
| 5972282 | 7377583 | 1815457 | --- | --- | --- | 1,03 | down |
| 5972310 | 7033672 | 970365  | --- | --- | --- | 1,87 | down |
| 5972495 | 7276231 | 1563103 | --- | --- | --- | 1,08 | down |
| 5972775 | 7331602 | 1699632 | --- | --- | --- | 1,23 | down |
| 5972855 | 7316644 | 1664053 | --- | --- | --- | 1,03 | down |
| 5972880 | 7117526 | 1171019 | --- | --- | --- | 1,14 | down |
| 5973011 | 7266778 | 1538854 | --- | --- | --- | 1,04 | up   |
| 5973025 | 7361420 | 1773037 | --- | --- | --- | 1,09 | down |
| 5973103 | 7123357 | 1185595 | --- | --- | --- | 1,74 | down |
| 5973133 | 7357103 | 1762383 | --- | --- | --- | 1,16 | up   |
| 5973238 | 7231835 | 1452281 | --- | --- | --- | 1,25 | up   |
| 5973269 | 7380497 | 1821873 | --- | --- | --- | 1,12 | down |
| 5973445 | 7243130 | 1480917 | --- | --- | --- | 1,18 | up   |
| 5973458 | 7303616 | 1631343 | --- | --- | --- | 1,07 | up   |
| 5973585 | 7038316 | 981463  | --- | --- | --- | 1,15 | up   |
| 5973604 | 7273223 | 1555892 | --- | --- | --- | 1,25 | down |
| 5973625 | 7057966 | 1026820 | --- | --- | --- | 1,39 | up   |
| 5973662 | 7233298 | 1456282 | --- | --- | --- | 1,02 | down |
| 5973677 | 7088489 | 1099525 | --- | --- | --- | 1,15 | up   |
| 5973702 | 7244602 | 1484776 | --- | --- | --- | 1,03 | up   |
| 5973731 | 7236254 | 1464066 | --- | --- | --- | 1,13 | down |

|         |         |         |     |     |     |      |      |
|---------|---------|---------|-----|-----|-----|------|------|
| 5973765 | 7097680 | 1121734 | --- | --- | --- | 1,14 | up   |
| 5973779 | 7181961 | 1330343 | --- | --- | --- | 2,32 | down |
| 5973787 | 7068853 | 1053128 | --- | --- | --- | 1,44 | down |
| 5973819 | 7068259 | 1051608 | --- | --- | --- | 1,03 | down |
| 5973877 | 7248790 | 1494518 | --- | --- | --- | 1,23 | down |
| 5973919 | 7340838 | 1722048 | --- | --- | --- | 2,01 | down |
| 5973953 | 7240569 | 1475464 | --- | --- | --- | 1,32 | down |
| 5973982 | 7374143 | 1807010 | --- | --- | --- | 1,10 | down |
| 5974065 | 7189184 | 1347598 | --- | --- | --- | 1,22 | down |
| 5974124 | 7349817 | 1744643 | --- | --- | --- | 1,11 | down |
| 5974129 | 7058713 | 1028664 | --- | --- | --- | 1,12 | down |
| 5974168 | 7101400 | 1130922 | --- | --- | --- | 1,07 | down |
| 5974203 | 7243603 | 1482292 | --- | --- | --- | 1,21 | up   |
| 5974257 | 7231152 | 1450277 | --- | --- | --- | 2,49 | up   |
| 5974262 | 7032204 | 966150  | --- | --- | --- | 1,08 | up   |
| 5974331 | 7076160 | 1070871 | --- | --- | --- | 1,23 | up   |
| 5974648 | 7224166 | 1432676 | --- | --- | --- | 1,23 | down |
| 5974806 | 7037764 | 979979  | --- | --- | --- | 1,34 | up   |
| 5974835 | 7059766 | 1030978 | --- | --- | --- | 1,48 | down |
| 5974851 | 7358048 | 1764802 | --- | --- | --- | 1,99 | down |
| 5974906 | 7034293 | 971978  | --- | --- | --- | 1,11 | down |
| 5974913 | 7054147 | 1018974 | --- | --- | --- | 1,28 | up   |
| 5975024 | 7104955 | 1140118 | --- | --- | --- | 1,04 | up   |
| 5975070 | 7129841 | 1200830 | --- | --- | --- | 1,59 | down |
| 5975135 | 7240569 | 1475451 | --- | --- | --- | 1,01 | down |
| 5975201 | 7244602 | 1484758 | --- | --- | --- | 1,13 | down |
| 5975207 | 7072552 | 1062134 | --- | --- | --- | 1,19 | up   |
| 5975450 | 7092549 | 1109119 | --- | --- | --- | 1,16 | down |
| 5975500 | 7229909 | 1447248 | --- | --- | --- | 1,51 | down |
| 5975537 | 7357815 | 1764147 | --- | --- | --- | 1,36 | up   |
| 5975660 | 7287238 | 1589771 | --- | --- | --- | 1,30 | down |
| 5975687 | 7169599 | 1298444 | --- | --- | --- | 1,18 | up   |
| 5975759 | 7032618 | 967317  | --- | --- | --- | 1,09 | down |
| 5975794 | 7092549 | 1109127 | --- | --- | --- | 1,56 | down |
| 5976015 | 7111573 | 1156031 | --- | --- | --- | 1,10 | up   |
| 5976191 | 7339387 | 1718383 | --- | --- | --- | 1,04 | up   |
| 5976330 | 7375958 | 1811479 | --- | --- | --- | 1,03 | up   |
| 5976387 | 7186106 | 1340495 | --- | --- | --- | 1,06 | up   |
| 5976449 | 7274780 | 1559213 | --- | --- | --- | 1,17 | up   |
| 5976464 | 7186688 | 1341846 | --- | --- | --- | 1,07 | up   |
| 5976501 | 7148661 | 1247674 | --- | --- | --- | 1,74 | down |
| 5976586 | 7369129 | 1793282 | --- | --- | --- | 1,17 | down |
| 5976663 | 7360486 | 1770950 | --- | --- | --- | 1,02 | up   |
| 5976719 | 7286807 | 1588830 | --- | --- | --- | 1,08 | down |
| 5976788 | 7231203 | 1450393 | --- | --- | --- | 1,36 | up   |
| 5976806 | 7249503 | 1496190 | --- | --- | --- | 1,13 | up   |
| 5976811 | 7380497 | 1821824 | --- | --- | --- | 1,50 | up   |
| 5976908 | 7323522 | 1679833 | --- | --- | --- | 1,05 | down |
| 5977030 | 7180243 | 1325513 | --- | --- | --- | 1,50 | down |
| 5977044 | 7095008 | 1115059 | --- | --- | --- | 1,29 | up   |
| 5977045 | 7188681 | 1346292 | --- | --- | --- | 1,13 | up   |
| 5977119 | 7213945 | 1407832 | --- | --- | --- | 1,81 | down |
| 5977197 | 7346066 | 1735322 | --- | --- | --- | 1,16 | up   |
| 5977302 | 7196233 | 1366098 | --- | --- | --- | 1,43 | down |
| 5977379 | 7069253 | 1054161 | --- | --- | --- | 1,12 | up   |
| 5977451 | 7330238 | 1695920 | --- | --- | --- | 1,49 | up   |

|         |         |         |     |     |     |      |      |
|---------|---------|---------|-----|-----|-----|------|------|
| 5977517 | 7363576 | 1778195 | --- | --- | --- | 1,09 | down |
| 5977627 | 7065266 | 1044583 | --- | --- | --- | 1,29 | up   |
| 5977836 | 7039223 | 983574  | --- | --- | --- | 1,39 | down |
| 5977946 | 7292154 | 1601671 | --- | --- | --- | 1,18 | up   |
| 5977993 | 7180732 | 1326733 | --- | --- | --- | 1,00 | up   |
| 5978130 | 7235069 | 1460986 | --- | --- | --- | 1,07 | down |
| 5978186 | 7286807 | 1588786 | --- | --- | --- | 1,39 | up   |
| 5978194 | 7052567 | 1015266 | --- | --- | --- | 1,14 | up   |
| 5978209 | 7029770 | 960158  | --- | --- | --- | 1,05 | up   |
| 5978287 | 7139708 | 1225069 | --- | --- | --- | 1,32 | down |
| 5978323 | 7059375 | 1030071 | --- | --- | --- | 1,09 | up   |
| 5978458 | 7240569 | 1475517 | --- | --- | --- | 1,01 | up   |
| 5978462 | 7369939 | 1795621 | --- | --- | --- | 1,64 | down |
| 5978488 | 7038971 | 982984  | --- | --- | --- | 1,01 | up   |
| 5978494 | 7289909 | 1596508 | --- | --- | --- | 1,23 | up   |
| 5978560 | 7053874 | 1018324 | --- | --- | --- | 1,22 | down |
| 5978757 | 7050557 | 1010800 | --- | --- | --- | 1,22 | down |
| 5978783 | 7216676 | 1414428 | --- | --- | --- | 1,02 | down |
| 5978905 | 7131360 | 1204978 | --- | --- | --- | 1,01 | down |
| 5979002 | 7261766 | 1527160 | --- | --- | --- | 1,18 | down |
| 5979161 | 7355220 | 1758094 | --- | --- | --- | 1,14 | down |
| 5979182 | 7334347 | 1705743 | --- | --- | --- | 1,23 | down |
| 5979238 | 7349946 | 1744941 | --- | --- | --- | 1,06 | down |
| 5979265 | 7025652 | 950234  | --- | --- | --- | 1,17 | down |
| 5979268 | 7136062 | 1216304 | --- | --- | --- | 1,34 | down |
| 5979288 | 7083030 | 1086243 | --- | --- | --- | 1,05 | up   |
| 5979334 | 7086751 | 1094633 | --- | --- | --- | 1,22 | up   |
| 5979354 | 7319259 | 1670401 | --- | --- | --- | 1,04 | down |
| 5979360 | 7355220 | 1758094 | --- | --- | --- | 1,00 | down |
| 5979370 | 7093936 | 1112479 | --- | --- | --- | 1,50 | down |
| 5979377 | 7374842 | 1808981 | --- | --- | --- | 1,37 | down |
| 5979426 | 7325674 | 1685219 | --- | --- | --- | 1,15 | up   |
| 5979450 | 7099573 | 1126713 | --- | --- | --- | 1,28 | down |
| 5979471 | 7267802 | 1541849 | --- | --- | --- | 1,08 | up   |
| 5979572 | 7247848 | 1492067 | --- | --- | --- | 1,26 | up   |
| 5979618 | 7025652 | 950293  | --- | --- | --- | 1,12 | up   |
| 5979641 | 7122486 | 1183421 | --- | --- | --- | 1,07 | down |
| 5979655 | 7376820 | 1813412 | --- | --- | --- | 1,22 | down |
| 5979703 | 7303616 | 1631330 | --- | --- | --- | 1,00 | up   |
| 5979753 | 7316644 | 1664020 | --- | --- | --- | 1,13 | up   |
| 5979782 | 7068853 | 1053118 | --- | --- | --- | 1,17 | up   |
| 5979831 | 7266706 | 1538746 | --- | --- | --- | 1,13 | up   |
| 5979855 | 7343092 | 1727650 | --- | --- | --- | 1,12 | up   |
| 5979934 | 7351333 | 1748159 | --- | --- | --- | 1,05 | up   |
| 5979937 | 7280743 | 1574549 | --- | --- | --- | 1,18 | down |
| 5980002 | 7075096 | 1068584 | --- | --- | --- | 1,12 | down |
| 5980101 | 7297589 | 1615607 | --- | --- | --- | 1,19 | down |
| 5980131 | 7069464 | 1054673 | --- | --- | --- | 1,06 | up   |
| 5980186 | 7057277 | 1025526 | --- | --- | --- | 1,85 | up   |
| 5980221 | 7364995 | 1781300 | --- | --- | --- | 1,10 | down |
| 5980318 | 7136062 | 1216304 | --- | --- | --- | 1,06 | down |
| 5980478 | 7034532 | 972649  | --- | --- | --- | 1,78 | down |
| 5980524 | 7207069 | 1392025 | --- | --- | --- | 1,72 | down |
| 5980705 | 7058713 | 1028664 | --- | --- | --- | 1,03 | up   |
| 5980738 | 7094158 | 1112970 | --- | --- | --- | 1,37 | up   |
| 5980879 | 7258670 | 1519347 | --- | --- | --- | 1,07 | up   |

|         |         |         |     |     |     |      |      |
|---------|---------|---------|-----|-----|-----|------|------|
| 5980941 | 7365183 | 1781905 | --- | --- | --- | 1,19 | down |
| 5980959 | 7145669 | 1240016 | --- | --- | --- | 1,08 | down |
| 5981050 | 7197820 | 1370086 | --- | --- | --- | 1,43 | down |
| 5981191 | 7287222 | 1589721 | --- | --- | --- | 1,16 | down |
| 5981265 | 7049399 | 1008398 | --- | --- | --- | 1,03 | up   |
| 5981268 | 7115907 | 1166942 | --- | --- | --- | 1,58 | down |
| 5981352 | 7280743 | 1574532 | --- | --- | --- | 1,05 | up   |
| 5981357 | 7072552 | 1062144 | --- | --- | --- | 1,21 | up   |
| 5981423 | 7363674 | 1778408 | --- | --- | --- | 1,14 | up   |
| 5981489 | 7073854 | 1065624 | --- | --- | --- | 1,32 | down |
| 5981635 | 7380497 | 1821837 | --- | --- | --- | 1,38 | up   |
| 5981659 | 7240569 | 1475490 | --- | --- | --- | 1,95 | up   |
| 5981714 | 7249503 | 1496224 | --- | --- | --- | 1,34 | down |
| 5981765 | 7142081 | 1230978 | --- | --- | --- | 1,05 | down |
| 5981841 | 7248790 | 1494493 | --- | --- | --- | 1,12 | down |
| 5981857 | 7240569 | 1475471 | --- | --- | --- | 1,00 | up   |
| 5981880 | 7056304 | 1023547 | --- | --- | --- | 1,25 | up   |
| 5981903 | 7210263 | 1399749 | --- | --- | --- | 2,46 | down |
| 5981982 | 7364346 | 1779990 | --- | --- | --- | 1,62 | up   |
| 5982022 | 7218728 | 1419917 | --- | --- | --- | 1,47 | down |
| 5982061 | 7264085 | 1532719 | --- | --- | --- | 1,05 | down |
| 5982142 | 7311367 | 1650726 | --- | --- | --- | 2,61 | down |
| 5982179 | 7236492 | 1464535 | --- | --- | --- | 1,63 | up   |
| 5982235 | 7123357 | 1185604 | --- | --- | --- | 1,02 | up   |
| 5982359 | 7361420 | 1773069 | --- | --- | --- | 1,08 | up   |
| 5982400 | 7297589 | 1615633 | --- | --- | --- | 1,34 | down |
| 5982446 | 7034756 | 973236  | --- | --- | --- | 1,21 | up   |
| 5982477 | 7119556 | 1176077 | --- | --- | --- | 1,16 | down |
| 5982510 | 7330238 | 1695952 | --- | --- | --- | 1,54 | down |
| 5982541 | 7374630 | 1808326 | --- | --- | --- | 1,41 | down |
| 5982722 | 7174149 | 1310491 | --- | --- | --- | 1,16 | down |
| 5982724 | 7273983 | 1557528 | --- | --- | --- | 1,48 | up   |
| 5982810 | 7099517 | 1126497 | --- | --- | --- | 1,01 | down |
| 5982833 | 7331237 | 1698721 | --- | --- | --- | 1,04 | down |
| 5982994 | 7352100 | 1750203 | --- | --- | --- | 1,13 | down |
| 5983005 | 7037764 | 979987  | --- | --- | --- | 1,05 | up   |
| 5983063 | 7300906 | 1624051 | --- | --- | --- | 1,11 | down |
| 5983114 | 7232029 | 1452749 | --- | --- | --- | 1,20 | down |
| 5983242 | 7236358 | 1464247 | --- | --- | --- | 1,45 | down |
| 5983465 | 7303616 | 1631378 | --- | --- | --- | 1,02 | up   |
| 5983694 | 7068259 | 1051646 | --- | --- | --- | 1,15 | up   |
| 5983793 | 7292517 | 1602555 | --- | --- | --- | 1,15 | up   |
| 5983898 | 7243603 | 1482276 | --- | --- | --- | 1,30 | up   |
| 5983918 | 7287238 | 1589774 | --- | --- | --- | 1,20 | down |
| 5983947 | 7316644 | 1664049 | --- | --- | --- | 1,76 | down |
| 5984009 | 7240569 | 1475324 | --- | --- | --- | 1,06 | down |
| 5984062 | 7156978 | 1268184 | --- | --- | --- | 1,06 | up   |
| 5984102 | 7156052 | 1265751 | --- | --- | --- | 1,06 | down |
| 5984106 | 7191983 | 1355170 | --- | --- | --- | 1,21 | down |
| 5984171 | 7242490 | 1479427 | --- | --- | --- | 1,73 | up   |
| 5984223 | 7156114 | 1266043 | --- | --- | --- | 1,58 | down |
| 5984396 | 7031576 | 964108  | --- | --- | --- | 1,15 | down |
| 5984405 | 7217747 | 1417486 | --- | --- | --- | 1,15 | up   |
| 5984482 | 7210780 | 1400874 | --- | --- | --- | 1,33 | down |
| 5984608 | 7132125 | 1206626 | --- | --- | --- | 1,04 | down |
| 5984627 | 7170832 | 1301811 | --- | --- | --- | 1,09 | down |

|         |         |         |     |     |     |      |      |
|---------|---------|---------|-----|-----|-----|------|------|
| 5984782 | 7244290 | 1484155 | --- | --- | --- | 1,11 | down |
| 5984827 | 7076236 | 1071193 | --- | --- | --- | 1,18 | up   |
| 5984854 | 7384073 | 1829462 | --- | --- | --- | 1,23 | down |
| 5984869 | 7171034 | 1302293 | --- | --- | --- | 1,13 | down |
| 5984912 | 7060851 | 1033437 | --- | --- | --- | 1,38 | up   |
| 5985056 | 7318631 | 1669025 | --- | --- | --- | 1,59 | up   |
| 5985091 | 7360325 | 1770559 | --- | --- | --- | 1,20 | down |
| 5985252 | 7052385 | 1014795 | --- | --- | --- | 1,39 | down |
| 5985330 | 7340057 | 1720324 | --- | --- | --- | 1,11 | up   |
| 5985336 | 7240569 | 1475443 | --- | --- | --- | 1,23 | down |
| 5985350 | 7240569 | 1475390 | --- | --- | --- | 1,10 | down |
| 5985353 | 7340990 | 1722511 | --- | --- | --- | 1,04 | down |
| 5985387 | 7233440 | 1456829 | --- | --- | --- | 1,02 | up   |
| 5985415 | 7064134 | 1041468 | --- | --- | --- | 2,43 | up   |
| 5985458 | 7249917 | 1497390 | --- | --- | --- | 1,67 | up   |
| 5985635 | 7064224 | 1041798 | --- | --- | --- | 1,20 | up   |
| 5985671 | 7350993 | 1747543 | --- | --- | --- | 1,43 | up   |
| 5985703 | 7245874 | 1487595 | --- | --- | --- | 1,28 | up   |
| 5985769 | 7137646 | 1220431 | --- | --- | --- | 1,28 | up   |
| 5985808 | 7263152 | 1530350 | --- | --- | --- | 1,16 | up   |
| 5985816 | 7118196 | 1172701 | --- | --- | --- | 1,20 | up   |
| 5985845 | 7319937 | 1672292 | --- | --- | --- | 2,28 | up   |
| 5985870 | 7060851 | 1033376 | --- | --- | --- | 1,10 | down |
| 5985873 | 7232029 | 1452785 | --- | --- | --- | 1,70 | down |
| 5985919 | 7198210 | 1370991 | --- | --- | --- | 1,20 | down |
| 5985923 | 7065823 | 1045714 | --- | --- | --- | 1,12 | down |
| 5986111 | 7098867 | 1124951 | --- | --- | --- | 1,03 | up   |
| 5986155 | 7238252 | 1469133 | --- | --- | --- | 1,19 | down |
| 5986158 | 7263152 | 1530386 | --- | --- | --- | 1,00 | up   |
| 5986245 | 7032444 | 966758  | --- | --- | --- | 1,32 | down |
| 5986286 | 7246548 | 1489157 | --- | --- | --- | 1,31 | down |
| 5986382 | 7155116 | 1263435 | --- | --- | --- | 1,04 | up   |
| 5986445 | 7154655 | 1262332 | --- | --- | --- | 1,03 | up   |
| 5986453 | 7169732 | 1298771 | --- | --- | --- | 1,26 | up   |
| 5986476 | 7248790 | 1494558 | --- | --- | --- | 1,00 | down |
| 5986574 | 7172373 | 1305567 | --- | --- | --- | 1,13 | up   |
| 5986686 | 7040260 | 986053  | --- | --- | --- | 1,10 | up   |
| 5986806 | 7050930 | 1011622 | --- | --- | --- | 1,34 | up   |
| 5986889 | 7142081 | 1230953 | --- | --- | --- | 1,04 | down |
| 5986944 | 7384509 | 1830724 | --- | --- | --- | 1,05 | down |
| 5986960 | 7213908 | 1407649 | --- | --- | --- | 1,03 | up   |
| 5986962 | 7323083 | 1678817 | --- | --- | --- | 1,07 | down |
| 5987064 | 7189689 | 1349041 | --- | --- | --- | 1,16 | down |
| 5987213 | 7318631 | 1669024 | --- | --- | --- | 1,09 | down |
| 5987233 | 7156978 | 1268185 | --- | --- | --- | 1,01 | down |
| 5987269 | 7068259 | 1051602 | --- | --- | --- | 1,19 | up   |
| 5987270 | 7099573 | 1126710 | --- | --- | --- | 1,19 | down |
| 5987325 | 7311218 | 1650345 | --- | --- | --- | 1,76 | down |
| 5987370 | 7097485 | 1120947 | --- | --- | --- | 1,27 | up   |
| 5987404 | 7127540 | 1195294 | --- | --- | --- | 1,03 | up   |
| 5987446 | 7084993 | 1090692 | --- | --- | --- | 1,01 | up   |
| 5987487 | 7346066 | 1735293 | --- | --- | --- | 2,16 | down |
| 5987488 | 7059766 | 1030972 | --- | --- | --- | 1,41 | down |
| 5987546 | 7094139 | 1112914 | --- | --- | --- | 1,03 | down |
| 5987600 | 7279303 | 1571211 | --- | --- | --- | 1,11 | down |
| 5987713 | 7088489 | 1099513 | --- | --- | --- | 1,02 | down |

|         |         |         |     |     |     |      |      |
|---------|---------|---------|-----|-----|-----|------|------|
| 5987776 | 7182713 | 1332535 | --- | --- | --- | 1,10 | up   |
| 5987811 | 7267802 | 1541743 | --- | --- | --- | 1,38 | up   |
| 5987904 | 7311218 | 1650362 | --- | --- | --- | 1,02 | up   |
| 5987914 | 7245921 | 1487678 | --- | --- | --- | 1,09 | down |
| 5988103 | 7214605 | 1409378 | --- | --- | --- | 1,18 | down |
| 5988117 | 7360486 | 1771019 | --- | --- | --- | 1,06 | up   |
| 5988176 | 7034486 | 972519  | --- | --- | --- | 1,31 | up   |
| 5988238 | 7261668 | 1526982 | --- | --- | --- | 1,43 | down |
| 5988253 | 7301879 | 1626622 | --- | --- | --- | 1,01 | up   |
| 5988297 | 7027759 | 956135  | --- | --- | --- | 1,10 | up   |
| 5988417 | 7341646 | 1724193 | --- | --- | --- | 1,01 | up   |
| 5988469 | 7316589 | 1663879 | --- | --- | --- | 1,37 | up   |
| 5988506 | 7335632 | 1708451 | --- | --- | --- | 1,01 | down |
| 5988694 | 7369781 | 1795026 | --- | --- | --- | 1,55 | up   |
| 5988712 | 7236358 | 1464220 | --- | --- | --- | 1,30 | down |
| 5988720 | 7364346 | 1780015 | --- | --- | --- | 1,30 | down |
| 5988904 | 7115708 | 1166475 | --- | --- | --- | 1,06 | up   |
| 5988909 | 7360486 | 1770945 | --- | --- | --- | 1,04 | down |
| 5988941 | 7031325 | 963575  | --- | --- | --- | 1,01 | down |
| 5988973 | 7050930 | 1011618 | --- | --- | --- | 1,16 | down |
| 5989090 | 7281507 | 1576711 | --- | --- | --- | 1,58 | up   |
| 5989104 | 7089381 | 1102063 | --- | --- | --- | 1,07 | up   |
| 5989174 | 7113984 | 1162226 | --- | --- | --- | 1,76 | up   |
| 5989212 | 7329135 | 1693497 | --- | --- | --- | 1,23 | up   |
| 5989267 | 7267802 | 1541800 | --- | --- | --- | 1,05 | up   |
| 5989373 | 7056333 | 1023696 | --- | --- | --- | 1,18 | down |
| 5989394 | 7293757 | 1605682 | --- | --- | --- | 1,02 | down |
| 5989433 | 7156170 | 1266234 | --- | --- | --- | 1,11 | up   |
| 5989526 | 7210780 | 1400863 | --- | --- | --- | 1,38 | down |
| 5989573 | 7144088 | 1236174 | --- | --- | --- | 1,23 | up   |
| 5989595 | 7143971 | 1235920 | --- | --- | --- | 1,00 | up   |
| 5989657 | 7038530 | 981886  | --- | --- | --- | 1,63 | down |
| 5989751 | 7207069 | 1392021 | --- | --- | --- | 1,33 | up   |
| 5989767 | 7148978 | 1248504 | --- | --- | --- | 1,08 | down |
| 5989795 | 7207069 | 1392019 | --- | --- | --- | 1,38 | up   |
| 5989964 | 7159642 | 1274197 | --- | --- | --- | 1,08 | down |
| 5990026 | 7078666 | 1076547 | --- | --- | --- | 1,08 | down |
| 5990083 | 7352044 | 1750022 | --- | --- | --- | 2,36 | down |
| 5990152 | 7244290 | 1484151 | --- | --- | --- | 1,46 | down |
| 5990203 | 7141061 | 1228644 | --- | --- | --- | 1,08 | up   |
| 5990235 | 7210600 | 1400526 | --- | --- | --- | 2,10 | down |
| 5990384 | 7155116 | 1263434 | --- | --- | --- | 1,50 | down |
| 5990391 | 7059766 | 1030973 | --- | --- | --- | 1,01 | up   |
| 5990445 | 7132020 | 1206318 | --- | --- | --- | 1,66 | down |
| 5990503 | 7259923 | 1522523 | --- | --- | --- | 1,28 | down |
| 5990593 | 7318143 | 1668090 | --- | --- | --- | 1,07 | down |
| 5990703 | 7280743 | 1574524 | --- | --- | --- | 1,34 | down |
| 5990727 | 7329846 | 1694998 | --- | --- | --- | 2,02 | up   |
| 5990738 | 7337224 | 1712605 | --- | --- | --- | 1,64 | down |
| 5990774 | 7312566 | 1653308 | --- | --- | --- | 1,59 | down |
| 5990976 | 7249503 | 1496218 | --- | --- | --- | 1,08 | down |
| 5991020 | 7064224 | 1041804 | --- | --- | --- | 1,31 | down |
| 5991103 | 7323083 | 1678799 | --- | --- | --- | 1,37 | up   |
| 5991343 | 7209927 | 1398950 | --- | --- | --- | 2,31 | down |
| 5991377 | 7339110 | 1717614 | --- | --- | --- | 1,08 | up   |
| 5991433 | 7350489 | 1746113 | --- | --- | --- | 1,12 | up   |

|         |         |         |     |     |     |      |      |
|---------|---------|---------|-----|-----|-----|------|------|
| 5991469 | 7267802 | 1541869 | --- | --- | --- | 1,34 | up   |
| 5991476 | 7150348 | 1251434 | --- | --- | --- | 1,08 | down |
| 5991503 | 7099573 | 1126720 | --- | --- | --- | 1,26 | down |
| 5991564 | 7177520 | 1318613 | --- | --- | --- | 2,09 | up   |
| 5991754 | 7378546 | 1817579 | --- | --- | --- | 1,03 | up   |
| 5991838 | 7319259 | 1670399 | --- | --- | --- | 1,06 | down |
| 5991858 | 7337224 | 1712556 | --- | --- | --- | 1,46 | up   |
| 5991862 | 7065265 | 1044568 | --- | --- | --- | 1,14 | up   |
| 5992013 | 7340057 | 1720334 | --- | --- | --- | 1,21 | up   |
| 5992113 | 7248790 | 1494504 | --- | --- | --- | 1,14 | up   |
| 5992232 | 7075445 | 1069345 | --- | --- | --- | 1,28 | up   |
| 5992299 | 7039223 | 983559  | --- | --- | --- | 1,49 | down |
| 5992508 | 7258784 | 1519674 | --- | --- | --- | 1,56 | up   |
| 5992532 | 7119930 | 1177227 | --- | --- | --- | 1,10 | down |
| 5992631 | 7198210 | 1370977 | --- | --- | --- | 1,49 | up   |
| 5992680 | 7096924 | 1119609 | --- | --- | --- | 2,58 | up   |
| 5992705 | 7033337 | 969484  | --- | --- | --- | 1,17 | down |
| 5992823 | 7199476 | 1374537 | --- | --- | --- | 1,01 | down |
| 5992862 | 7356115 | 1760116 | --- | --- | --- | 1,08 | up   |
| 5992933 | 7321029 | 1674804 | --- | --- | --- | 1,20 | down |
| 5993052 | 7056333 | 1023690 | --- | --- | --- | 1,08 | down |
| 5993071 | 7148978 | 1248486 | --- | --- | --- | 1,07 | up   |
| 5993137 | 7286807 | 1588818 | --- | --- | --- | 1,24 | up   |
| 5993232 | 7247228 | 1490533 | --- | --- | --- | 1,10 | down |
| 5993251 | 7274593 | 1558805 | --- | --- | --- | 5,40 | down |
| 5993348 | 7099573 | 1126708 | --- | --- | --- | 1,04 | down |
| 5993385 | 7274780 | 1559255 | --- | --- | --- | 1,35 | down |
| 5993675 | 7122131 | 1182670 | --- | --- | --- | 1,03 | down |
| 5993706 | 7083031 | 1086280 | --- | --- | --- | 1,09 | up   |
| 5993874 | 7365093 | 1781625 | --- | --- | --- | 1,11 | up   |
| 5994056 | 7243647 | 1482431 | --- | --- | --- | 1,04 | up   |
| 5994157 | 7070461 | 1057366 | --- | --- | --- | 1,32 | down |
| 5994181 | 7174149 | 1310506 | --- | --- | --- | 1,06 | up   |
| 5994218 | 7052933 | 1016219 | --- | --- | --- | 1,32 | down |
| 5994307 | 7156052 | 1265751 | --- | --- | --- | 1,01 | up   |
| 5994374 | 7115880 | 1166835 | --- | --- | --- | 1,21 | down |
| 5994389 | 7084193 | 1089060 | --- | --- | --- | 1,08 | up   |
| 5994424 | 7341397 | 1723624 | --- | --- | --- | 1,23 | down |
| 5994435 | 7369400 | 1793982 | --- | --- | --- | 1,17 | down |
| 5994482 | 7070836 | 1058356 | --- | --- | --- | 1,12 | down |
| 5994494 | 7212308 | 1404015 | --- | --- | --- | 1,26 | down |
| 5994503 | 7193644 | 1359716 | --- | --- | --- | 1,16 | down |
| 5994545 | 7131764 | 1205854 | --- | --- | --- | 1,93 | up   |
| 5994559 | 7122486 | 1183419 | --- | --- | --- | 1,07 | down |
| 5994585 | 7050167 | 1009824 | --- | --- | --- | 1,02 | up   |
| 5994765 | 7261019 | 1525252 | --- | --- | --- | 1,46 | down |
| 5994960 | 7059375 | 1030065 | --- | --- | --- | 1,34 | down |
| 5995002 | 7086966 | 1095261 | --- | --- | --- | 1,06 | down |
| 5995078 | 7129578 | 1200072 | --- | --- | --- | 1,10 | up   |
| 5995161 | 7213945 | 1407866 | --- | --- | --- | 1,48 | down |
| 5995162 | 7148978 | 1248455 | --- | --- | --- | 1,01 | up   |
| 5995324 | 7148978 | 1248486 | --- | --- | --- | 1,23 | up   |
| 5995382 | 7125348 | 1190100 | --- | --- | --- | 2,75 | up   |
| 5995487 | 7243647 | 1482458 | --- | --- | --- | 1,22 | up   |
| 5995509 | 7141061 | 1228643 | --- | --- | --- | 1,41 | up   |
| 5995619 | 7058713 | 1028654 | --- | --- | --- | 1,02 | down |



|         |         |         |     |     |     |      |      |
|---------|---------|---------|-----|-----|-----|------|------|
| 5995666 | 7231650 | 1451862 | --- | --- | --- | 1,21 | up   |
| 5995749 | 7236492 | 1464535 | --- | --- | --- | 1,03 | up   |
| 5995761 | 7025652 | 950345  | --- | --- | --- | 1,01 | up   |
| 5995801 | 7133612 | 1210256 | --- | --- | --- | 1,06 | up   |
| 5995814 | 7194017 | 1360791 | --- | --- | --- | 1,54 | up   |
| 5995848 | 7050930 | 1011610 | --- | --- | --- | 1,14 | down |
| 5995913 | 7226241 | 1437812 | --- | --- | --- | 1,55 | up   |
| 5995969 | 7243130 | 1480822 | --- | --- | --- | 1,12 | down |
| 5996032 | 7072765 | 1062732 | --- | --- | --- | 1,04 | down |
| 5996291 | 7238115 | 1468609 | --- | --- | --- | 1,24 | down |
| 5996317 | 7156052 | 1265758 | --- | --- | --- | 1,16 | down |
| 5996320 | 7270592 | 1548560 | --- | --- | --- | 1,07 | up   |
| 5996535 | 7069830 | 1055625 | --- | --- | --- | 1,04 | down |
| 5996578 | 7096924 | 1119618 | --- | --- | --- | 1,20 | down |
| 5996595 | 7113083 | 1159980 | --- | --- | --- | 1,58 | up   |
| 5996609 | 7049399 | 1008350 | --- | --- | --- | 1,37 | down |
| 5996627 | 7249503 | 1496189 | --- | --- | --- | 1,14 | up   |
| 5996779 | 7349804 | 1744567 | --- | --- | --- | 1,09 | up   |
| 5996783 | 7098810 | 1124646 | --- | --- | --- | 1,24 | down |
| 5996851 | 7277719 | 1567091 | --- | --- | --- | 1,05 | down |
| 5996913 | 7099973 | 1127535 | --- | --- | --- | 1,06 | down |
| 5996949 | 7120169 | 1177811 | --- | --- | --- | 1,41 | up   |
| 5996957 | 7367971 | 1789119 | --- | --- | --- | 1,12 | up   |
| 5996976 | 7123357 | 1185600 | --- | --- | --- | 1,18 | down |
| 5996977 | 7092406 | 1108785 | --- | --- | --- | 1,04 | down |
| 5996997 | 7068853 | 1053110 | --- | --- | --- | 1,21 | down |
| 5997093 | 7155286 | 1263902 | --- | --- | --- | 1,23 | down |
| 5997300 | 7121866 | 1181881 | --- | --- | --- | 1,12 | down |
| 5997371 | 7228848 | 1444755 | --- | --- | --- | 1,24 | down |
| 5997532 | 7350237 | 1745479 | --- | --- | --- | 1,06 | down |
| 5997554 | 7079600 | 1078625 | --- | --- | --- | 1,20 | down |
| 5997614 | 7146245 | 1241377 | --- | --- | --- | 1,09 | down |
| 5997620 | 7236492 | 1464537 | --- | --- | --- | 1,42 | up   |
| 5997622 | 7032204 | 966173  | --- | --- | --- | 1,08 | down |
| 5997629 | 7097525 | 1121047 | --- | --- | --- | 1,42 | down |
| 5997898 | 7188685 | 1346317 | --- | --- | --- | 1,46 | down |
| 5998306 | 7188685 | 1346321 | --- | --- | --- | 1,38 | up   |
| 5998342 | 7241136 | 1476720 | --- | --- | --- | 1,10 | up   |
| 5998425 | 7323545 | 1679974 | --- | --- | --- | 1,45 | up   |
| 5998430 | 7363674 | 1778417 | --- | --- | --- | 1,18 | up   |
| 5998445 | 7344190 | 1730618 | --- | --- | --- | 1,11 | up   |
| 5998465 | 7232340 | 1453533 | --- | --- | --- | 1,33 | up   |
| 5998478 | 7120379 | 1178329 | --- | --- | --- | 1,01 | up   |
| 5998599 | 7068853 | 1053132 | --- | --- | --- | 1,06 | down |
| 5998771 | 7073854 | 1065626 | --- | --- | --- | 1,12 | up   |
| 5998856 | 7267802 | 1541741 | --- | --- | --- | 2,63 | down |
| 5998892 | 7099573 | 1126741 | --- | --- | --- | 1,46 | up   |
| 5998895 | 7149817 | 1250309 | --- | --- | --- | 1,34 | down |
| 5998897 | 7358708 | 1766594 | --- | --- | --- | 1,38 | down |
| 5998899 | 7060851 | 1033404 | --- | --- | --- | 1,00 | down |
| 5998906 | 7279533 | 1571916 | --- | --- | --- | 1,39 | down |
| 5998920 | 7370843 | 1798379 | --- | --- | --- | 1,27 | down |
| 5998931 | 7092965 | 1110170 | --- | --- | --- | 1,39 | down |
| 5999008 | 7132125 | 1206609 | --- | --- | --- | 1,04 | up   |
| 5999021 | 7234425 | 1459406 | --- | --- | --- | 1,68 | up   |
| 5999244 | 7236358 | 1464222 | --- | --- | --- | 1,44 | up   |

|         |         |         |     |     |     |      |      |
|---------|---------|---------|-----|-----|-----|------|------|
| 5999346 | 7085848 | 1092420 | --- | --- | --- | 1,20 | up   |
| 5999437 | 7133181 | 1209151 | --- | --- | --- | 1,19 | up   |
| 5999469 | 7240569 | 1475492 | --- | --- | --- | 1,52 | up   |
| 5999583 | 7099573 | 1126722 | --- | --- | --- | 1,08 | down |
| 5999609 | 7279793 | 1572539 | --- | --- | --- | 1,39 | down |
| 5999831 | 7301022 | 1624254 | --- | --- | --- | 1,10 | down |
| 5999858 | 7073928 | 1065805 | --- | --- | --- | 1,20 | down |
| 5999901 | 7132125 | 1206611 | --- | --- | --- | 1,10 | down |
| 5999945 | 7349946 | 1744948 | --- | --- | --- | 1,27 | down |
| 6000186 | 7290585 | 1598179 | --- | --- | --- | 1,27 | up   |
| 6000246 | 7049399 | 1008372 | --- | --- | --- | 1,25 | up   |
| 6000258 | 7239939 | 1473792 | --- | --- | --- | 1,51 | up   |
| 6000308 | 7364346 | 1780006 | --- | --- | --- | 1,30 | down |
| 6000463 | 7182056 | 1330576 | --- | --- | --- | 1,20 | up   |
| 6000537 | 7340990 | 1722514 | --- | --- | --- | 1,35 | down |
| 6000579 | 7115907 | 1166941 | --- | --- | --- | 1,28 | up   |
| 6000601 | 7240569 | 1475502 | --- | --- | --- | 1,74 | down |
| 6000633 | 7229886 | 1447150 | --- | --- | --- | 1,01 | down |
| 6000753 | 7344702 | 1732140 | --- | --- | --- | 1,32 | up   |
| 6000760 | 7279533 | 1571917 | --- | --- | --- | 1,19 | up   |
| 6000945 | 7075445 | 1069348 | --- | --- | --- | 1,10 | down |
| 6000966 | 7258520 | 1518854 | --- | --- | --- | 1,04 | down |
| 6000968 | 7373038 | 1804288 | --- | --- | --- | 1,53 | up   |
| 6001084 | 7339379 | 1718357 | --- | --- | --- | 1,24 | up   |
| 6001104 | 7107066 | 1144783 | --- | --- | --- | 1,56 | up   |
| 6001170 | 7157341 | 1269149 | --- | --- | --- | 1,44 | down |
| 6001218 | 7196029 | 1365637 | --- | --- | --- | 1,29 | down |
| 6001254 | 7319259 | 1670395 | --- | --- | --- | 1,18 | down |
| 6001475 | 7132125 | 1206597 | --- | --- | --- | 1,21 | up   |
| 6001564 | 7369031 | 1793013 | --- | --- | --- | 1,02 | up   |
| 6001581 | 7323545 | 1679963 | --- | --- | --- | 1,49 | down |
| 6001607 | 7052385 | 1014785 | --- | --- | --- | 1,06 | down |
| 6001628 | 7344406 | 1731222 | --- | --- | --- | 1,49 | down |
| 6001832 | 7075533 | 1069572 | --- | --- | --- | 1,10 | down |
| 6001959 | 7071264 | 1059341 | --- | --- | --- | 2,02 | up   |
| 6002117 | 7029770 | 960150  | --- | --- | --- | 1,03 | up   |
| 6002162 | 7297589 | 1615592 | --- | --- | --- | 1,10 | up   |
| 6002178 | 7325674 | 1685228 | --- | --- | --- | 1,30 | up   |
| 6002185 | 7156978 | 1268173 | --- | --- | --- | 1,32 | up   |
| 6002483 | 7181105 | 1327967 | --- | --- | --- | 1,25 | up   |
| 6002643 | 7233359 | 1456515 | --- | --- | --- | 1,30 | down |
| 6002651 | 7062927 | 1038643 | --- | --- | --- | 1,13 | up   |
| 6002686 | 7161841 | 1279879 | --- | --- | --- | 1,55 | down |
| 6002719 | 7032083 | 965678  | --- | --- | --- | 1,06 | down |
| 6002759 | 7243253 | 1481227 | --- | --- | --- | 1,11 | up   |
| 6002969 | 7031576 | 964110  | --- | --- | --- | 1,03 | up   |
| 6003134 | 7097680 | 1121746 | --- | --- | --- | 1,03 | up   |
| 6003178 | 7233440 | 1456855 | --- | --- | --- | 1,31 | up   |
| 6003256 | 7277783 | 1567454 | --- | --- | --- | 2,03 | up   |
| 6003264 | 7190524 | 1351173 | --- | --- | --- | 1,10 | up   |
| 6003295 | 7041609 | 989556  | --- | --- | --- | 1,05 | down |
| 6003307 | 7258670 | 1519340 | --- | --- | --- | 2,01 | up   |
| 6003381 | 7373038 | 1804294 | --- | --- | --- | 1,06 | down |
| 6003490 | 7061550 | 1035284 | --- | --- | --- | 1,08 | down |
| 6003559 | 7368565 | 1791286 | --- | --- | --- | 1,34 | down |
| 6003560 | 7343122 | 1727726 | --- | --- | --- | 1,24 | down |

|         |         |         |     |     |     |      |      |
|---------|---------|---------|-----|-----|-----|------|------|
| 6003568 | 7319937 | 1672291 | --- | --- | --- | 1,09 | up   |
| 6003712 | 7148978 | 1248460 | --- | --- | --- | 1,01 | up   |
| 6003883 | 7331434 | 1699203 | --- | --- | --- | 1,05 | down |
| 6003947 | 7342959 | 1727334 | --- | --- | --- | 1,07 | down |
| 6004025 | 7380497 | 1821824 | --- | --- | --- | 1,06 | down |
| 6004039 | 7068942 | 1053374 | --- | --- | --- | 1,37 | down |
| 6004148 | 7284359 | 1583435 | --- | --- | --- | 1,10 | down |
| 6004215 | 7243130 | 1480828 | --- | --- | --- | 1,01 | down |
| 6004328 | 7166439 | 1290100 | --- | --- | --- | 1,63 | down |
| 6004339 | 7312627 | 1653487 | --- | --- | --- | 1,03 | up   |
| 6004342 | 7277783 | 1567444 | --- | --- | --- | 2,72 | up   |
| 6004476 | 7192320 | 1356021 | --- | --- | --- | 1,16 | up   |
| 6004515 | 7332059 | 1700728 | --- | --- | --- | 2,18 | down |
| 6004544 | 7052331 | 1014567 | --- | --- | --- | 1,11 | up   |
| 6004653 | 7255522 | 1511418 | --- | --- | --- | 1,43 | up   |
| 6004675 | 7031774 | 964789  | --- | --- | --- | 1,51 | down |
| 6004758 | 7224035 | 1432385 | --- | --- | --- | 1,53 | down |
| 6004810 | 7316644 | 1664012 | --- | --- | --- | 1,36 | up   |
| 6004883 | 7284359 | 1583439 | --- | --- | --- | 1,47 | down |
| 6004917 | 7233440 | 1456860 | --- | --- | --- | 1,25 | down |
| 6004942 | 7141061 | 1228644 | --- | --- | --- | 1,08 | up   |
| 6005010 | 7243647 | 1482486 | --- | --- | --- | 1,02 | up   |
| 6005061 | 7068259 | 1051624 | --- | --- | --- | 1,31 | up   |
| 6005152 | 7331297 | 1698814 | --- | --- | --- | 1,08 | down |
| 6005165 | 7146093 | 1240914 | --- | --- | --- | 1,10 | up   |
| 6005235 | 7132024 | 1206337 | --- | --- | --- | 1,80 | down |
| 6005305 | 7098077 | 1122730 | --- | --- | --- | 1,58 | down |
| 6005355 | 7339379 | 1718362 | --- | --- | --- | 1,09 | up   |
| 6005363 | 7319065 | 1669979 | --- | --- | --- | 2,10 | up   |
| 6005439 | 7148978 | 1248487 | --- | --- | --- | 1,02 | up   |
| 6005456 | 7145669 | 1240002 | --- | --- | --- | 1,86 | up   |
| 6005478 | 7072754 | 1062672 | --- | --- | --- | 1,18 | down |
| 6005523 | 7064468 | 1042347 | --- | --- | --- | 1,03 | up   |
| 6005624 | 7065655 | 1045247 | --- | --- | --- | 1,03 | down |
| 6005644 | 7049399 | 1008360 | --- | --- | --- | 1,05 | up   |
| 6005655 | 7083030 | 1086248 | --- | --- | --- | 1,17 | up   |
| 6005739 | 7350237 | 1745486 | --- | --- | --- | 1,10 | down |
| 6005743 | 7033504 | 969851  | --- | --- | --- | 1,03 | up   |
| 6005783 | 7070616 | 1057782 | --- | --- | --- | 1,24 | up   |
| 6005864 | 7236254 | 1464070 | --- | --- | --- | 1,02 | down |
| 6005889 | 7300446 | 1622849 | --- | --- | --- | 2,02 | up   |
| 6005899 | 7115362 | 1165598 | --- | --- | --- | 1,62 | down |
| 6006010 | 7190582 | 1351395 | --- | --- | --- | 1,27 | up   |
| 6006209 | 7034756 | 973228  | --- | --- | --- | 1,26 | up   |
| 6006250 | 7321029 | 1674814 | --- | --- | --- | 1,33 | up   |
| 6006263 | 7235521 | 1462153 | --- | --- | --- | 1,46 | up   |
| 6006314 | 7342959 | 1727352 | --- | --- | --- | 1,32 | up   |
| 6006474 | 7034353 | 972134  | --- | --- | --- | 1,90 | up   |
| 6006488 | 7070836 | 1058341 | --- | --- | --- | 1,01 | down |
| 6006735 | 7100307 | 1128390 | --- | --- | --- | 2,39 | down |
| 6006737 | 7345465 | 1733849 | --- | --- | --- | 1,58 | up   |
| 6006739 | 7162177 | 1280580 | --- | --- | --- | 1,22 | up   |
| 6006828 | 7236395 | 1464323 | --- | --- | --- | 1,03 | down |
| 6006972 | 7168858 | 1296833 | --- | --- | --- | 1,69 | down |
| 6006979 | 7271643 | 1551700 | --- | --- | --- | 1,00 | up   |
| 6007101 | 7342959 | 1727338 | --- | --- | --- | 1,25 | down |

|         |         |         |     |     |     |      |      |
|---------|---------|---------|-----|-----|-----|------|------|
| 6007124 | 7341002 | 1722555 | --- | --- | --- | 1,47 | up   |
| 6007137 | 7303616 | 1631322 | --- | --- | --- | 1,02 | up   |
| 6007144 | 7119179 | 1174996 | --- | --- | --- | 1,20 | up   |
| 6007159 | 7025049 | 948509  | --- | --- | --- | 1,12 | down |
| 6007194 | 7182713 | 1332532 | --- | --- | --- | 1,17 | up   |
| 6007247 | 7231152 | 1450229 | --- | --- | --- | 1,25 | up   |
| 6007259 | 7065265 | 1044562 | --- | --- | --- | 1,01 | down |
| 6007352 | 7217679 | 1417319 | --- | --- | --- | 1,03 | up   |
| 6007369 | 7297589 | 1615675 | --- | --- | --- | 1,50 | up   |
| 6007513 | 7358859 | 1766961 | --- | --- | --- | 1,08 | up   |
| 6007586 | 7349817 | 1744643 | --- | --- | --- | 1,11 | down |
| 6007681 | 7073854 | 1065630 | --- | --- | --- | 1,31 | down |
| 6007683 | 7287222 | 1589727 | --- | --- | --- | 1,25 | down |
| 6007791 | 7229886 | 1447156 | --- | --- | --- | 1,37 | up   |
| 6007949 | 7374790 | 1808784 | --- | --- | --- | 1,01 | down |
| 6007951 | 7373906 | 1806360 | --- | --- | --- | 1,08 | down |
| 6008057 | 7367969 | 1789098 | --- | --- | --- | 1,19 | down |
| 6008125 | 7139026 | 1223500 | --- | --- | --- | 1,00 | down |
| 6008157 | 7263152 | 1530382 | --- | --- | --- | 1,10 | down |
| 6008485 | 7146245 | 1241377 | --- | --- | --- | 1,18 | down |
| 6008544 | 7092965 | 1110176 | --- | --- | --- | 1,02 | down |
| 6008608 | 7239752 | 1473182 | --- | --- | --- | 1,10 | up   |
| 6008614 | 7330238 | 1695957 | --- | --- | --- | 1,01 | up   |
| 6008629 | 7228848 | 1444755 | --- | --- | --- | 2,14 | down |
| 6008633 | 7233012 | 1455415 | --- | --- | --- | 1,03 | down |
| 6008651 | 7297154 | 1614217 | --- | --- | --- | 1,30 | up   |
| 6008675 | 7190844 | 1352107 | --- | --- | --- | 1,55 | up   |
| 6008696 | 7108551 | 1148704 | --- | --- | --- | 1,10 | down |
| 6008717 | 7343122 | 1727739 | --- | --- | --- | 1,17 | down |
| 6008757 | 7113483 | 1160999 | --- | --- | --- | 1,20 | up   |
| 6008820 | 7299083 | 1619263 | --- | --- | --- | 1,69 | up   |
| 6008824 | 7363768 | 1778604 | --- | --- | --- | 1,01 | up   |
| 6008930 | 7341397 | 1723634 | --- | --- | --- | 1,48 | down |
| 6009014 | 7355244 | 1758139 | --- | --- | --- | 2,11 | up   |
| 6009107 | 7088164 | 1098466 | --- | --- | --- | 1,46 | up   |
| 6009141 | 7238199 | 1468926 | --- | --- | --- | 1,34 | down |
| 6009229 | 7169732 | 1298780 | --- | --- | --- | 1,18 | up   |
| 6009232 | 7087965 | 1098063 | --- | --- | --- | 1,17 | up   |
| 6009356 | 7073898 | 1065732 | --- | --- | --- | 2,12 | down |
| 6009516 | 7122319 | 1183068 | --- | --- | --- | 1,22 | down |
| 6009594 | 7115880 | 1166828 | --- | --- | --- | 1,44 | up   |
| 6009610 | 7257976 | 1517712 | --- | --- | --- | 1,17 | down |
| 6009674 | 7338807 | 1716797 | --- | --- | --- | 1,08 | down |
| 6009687 | 7199476 | 1374525 | --- | --- | --- | 1,06 | up   |
| 6009692 | 7243647 | 1482475 | --- | --- | --- | 1,00 | up   |
| 6009699 | 7210445 | 1400147 | --- | --- | --- | 1,06 | up   |
| 6009880 | 7267380 | 1540434 | --- | --- | --- | 1,06 | up   |
| 6010004 | 7058813 | 1028893 | --- | --- | --- | 1,85 | up   |
| 6010061 | 7171525 | 1303445 | --- | --- | --- | 1,40 | down |
| 6010330 | 7297589 | 1615641 | --- | --- | --- | 1,08 | down |
| 6010666 | 7087965 | 1098025 | --- | --- | --- | 1,23 | up   |
| 6010987 | 7059584 | 1030558 | --- | --- | --- | 1,32 | up   |
| 6011043 | 7236991 | 1465782 | --- | --- | --- | 1,46 | down |
| 6011081 | 7053878 | 1018367 | --- | --- | --- | 1,56 | down |
| 6011232 | 7235069 | 1460981 | --- | --- | --- | 1,40 | up   |
| 6011284 | 7380497 | 1821837 | --- | --- | --- | 1,01 | up   |

|         |         |         |     |     |     |      |      |
|---------|---------|---------|-----|-----|-----|------|------|
| 6011438 | 7064224 | 1041782 | --- | --- | --- | 1,98 | down |
| 6011493 | 7052331 | 1014605 | --- | --- | --- | 1,01 | up   |
| 6011496 | 7129841 | 1200834 | --- | --- | --- | 1,56 | down |
| 6011555 | 7316644 | 1664027 | --- | --- | --- | 1,07 | up   |
| 6011595 | 7052331 | 1014568 | --- | --- | --- | 1,45 | down |
| 6011601 | 7261668 | 1526981 | --- | --- | --- | 1,07 | down |
| 6011630 | 7199476 | 1374530 | --- | --- | --- | 1,43 | up   |
| 6011672 | 7287222 | 1589733 | --- | --- | --- | 1,09 | down |
| 6011680 | 7292517 | 1602552 | --- | --- | --- | 1,12 | down |
| 6011830 | 7336931 | 1711896 | --- | --- | --- | 1,02 | down |
| 6011865 | 7142081 | 1230973 | --- | --- | --- | 1,02 | up   |
| 6011930 | 7367748 | 1788247 | --- | --- | --- | 1,18 | up   |
| 6011949 | 7218259 | 1418794 | --- | --- | --- | 1,05 | down |
| 6011970 | 7340757 | 1721902 | --- | --- | --- | 1,03 | up   |
| 6012035 | 7033616 | 970191  | --- | --- | --- | 1,18 | down |
| 6012091 | 7217650 | 1417180 | --- | --- | --- | 1,29 | down |
| 6012280 | 7253408 | 1505940 | --- | --- | --- | 1,21 | down |
| 6012361 | 7121866 | 1181872 | --- | --- | --- | 1,31 | down |
| 6012368 | 7065265 | 1044565 | --- | --- | --- | 1,14 | up   |
| 6012419 | 7323545 | 1679930 | --- | --- | --- | 1,93 | down |
| 6012515 | 7258545 | 1518928 | --- | --- | --- | 1,40 | down |
| 6012590 | 7226241 | 1437804 | --- | --- | --- | 1,16 | down |
| 6012601 | 7221247 | 1425838 | --- | --- | --- | 1,13 | up   |
| 6012668 | 7357815 | 1764153 | --- | --- | --- | 1,04 | up   |
| 6012677 | 7234425 | 1459405 | --- | --- | --- | 1,03 | up   |
| 6012726 | 7372840 | 1803781 | --- | --- | --- | 1,32 | up   |
| 6012744 | 7279073 | 1570710 | --- | --- | --- | 1,13 | up   |
| 6012769 | 7043535 | 994123  | --- | --- | --- | 1,07 | up   |
| 6012801 | 7189669 | 1348994 | --- | --- | --- | 1,08 | down |
| 6012843 | 7073673 | 1065088 | --- | --- | --- | 1,59 | down |
| 6012913 | 7226241 | 1437797 | --- | --- | --- | 1,16 | up   |
| 6012923 | 7363768 | 1778601 | --- | --- | --- | 1,88 | down |
| 6012995 | 7213908 | 1407732 | --- | --- | --- | 1,03 | up   |
| 6013063 | 7249503 | 1496236 | --- | --- | --- | 1,02 | down |
| 6013064 | 7180861 | 1327219 | --- | --- | --- | 1,11 | down |
| 6013098 | 7339110 | 1717614 | --- | --- | --- | 1,02 | up   |
| 6013102 | 7230611 | 1448801 | --- | --- | --- | 1,46 | down |
| 6013131 | 7372840 | 1803783 | --- | --- | --- | 1,42 | down |
| 6013168 | 7233440 | 1456868 | --- | --- | --- | 1,36 | down |
| 6013246 | 7213679 | 1407142 | --- | --- | --- | 1,11 | up   |
| 6013276 | 7240569 | 1475485 | --- | --- | --- | 1,41 | down |
| 6013337 | 7198002 | 1370444 | --- | --- | --- | 1,57 | up   |
| 6013423 | 7157341 | 1269249 | --- | --- | --- | 1,24 | down |
| 6013429 | 7031618 | 964199  | --- | --- | --- | 1,18 | up   |
| 6013468 | 7301140 | 1624589 | --- | --- | --- | 1,39 | up   |
| 6013489 | 7156061 | 1265841 | --- | --- | --- | 1,40 | down |
| 6013545 | 7240569 | 1475382 | --- | --- | --- | 1,44 | down |
| 6013549 | 7036559 | 977250  | --- | --- | --- | 1,16 | down |
| 6013631 | 7170845 | 1301861 | --- | --- | --- | 1,26 | down |
| 6013646 | 7069253 | 1054148 | --- | --- | --- | 1,20 | up   |
| 6013674 | 7169732 | 1298749 | --- | --- | --- | 1,09 | up   |
| 6013715 | 7179785 | 1324499 | --- | --- | --- | 1,70 | up   |
| 6013778 | 7260553 | 1524109 | --- | --- | --- | 1,10 | down |
| 6013782 | 7312566 | 1653321 | --- | --- | --- | 1,09 | up   |
| 6013992 | 7186464 | 1341387 | --- | --- | --- | 1,03 | down |
| 6013994 | 7087492 | 1096707 | --- | --- | --- | 1,17 | down |

|         |         |         |     |     |     |      |      |
|---------|---------|---------|-----|-----|-----|------|------|
| 6014027 | 7083031 | 1086284 | --- | --- | --- | 1,25 | up   |
| 6014165 | 7384509 | 1830753 | --- | --- | --- | 1,22 | down |
| 6014257 | 7336250 | 1710171 | --- | --- | --- | 1,35 | up   |
| 6014284 | 7362184 | 1774822 | --- | --- | --- | 1,11 | down |
| 6014326 | 7367994 | 1789263 | --- | --- | --- | 1,13 | down |
| 6014354 | 7056333 | 1023717 | --- | --- | --- | 1,22 | up   |
| 6014547 | 7049399 | 1008319 | --- | --- | --- | 1,04 | up   |
| 6014670 | 7075424 | 1069306 | --- | --- | --- | 1,42 | up   |
| 6014681 | 7329846 | 1695002 | --- | --- | --- | 1,35 | up   |
| 6014740 | 7274593 | 1558815 | --- | --- | --- | 1,29 | up   |
| 6014801 | 7134690 | 1212765 | --- | --- | --- | 1,31 | up   |
| 6014803 | 7197056 | 1367840 | --- | --- | --- | 2,07 | down |
| 6014852 | 7365183 | 1781902 | --- | --- | --- | 1,88 | up   |
| 6014871 | 7201217 | 1378760 | --- | --- | --- | 1,09 | up   |
| 6014905 | 7102113 | 1132840 | --- | --- | --- | 1,15 | up   |
| 6014940 | 7384509 | 1830719 | --- | --- | --- | 1,25 | up   |
| 6015230 | 7249737 | 1496761 | --- | --- | --- | 1,25 | up   |
| 6015242 | 7232340 | 1453530 | --- | --- | --- | 1,13 | up   |
| 6015336 | 7253408 | 1505949 | --- | --- | --- | 1,30 | up   |
| 6015369 | 7373678 | 1805877 | --- | --- | --- | 1,09 | up   |
| 6015374 | 7033504 | 969843  | --- | --- | --- | 2,01 | up   |
| 6015395 | 7342959 | 1727354 | --- | --- | --- | 1,19 | up   |
| 6015416 | 7249917 | 1497395 | --- | --- | --- | 1,55 | up   |
| 6015425 | 7059375 | 1030067 | --- | --- | --- | 1,09 | down |
| 6015476 | 7130889 | 1203865 | --- | --- | --- | 1,20 | down |
| 6015477 | 7374842 | 1808992 | --- | --- | --- | 1,17 | up   |
| 6015499 | 7275103 | 1560212 | --- | --- | --- | 1,03 | up   |
| 6015505 | 7125348 | 1190075 | --- | --- | --- | 1,44 | up   |
| 6015517 | 7279568 | 1572041 | --- | --- | --- | 1,89 | up   |
| 6015589 | 7380019 | 1820827 | --- | --- | --- | 1,15 | up   |
| 6015612 | 7069830 | 1055629 | --- | --- | --- | 1,12 | up   |
| 6015684 | 7364346 | 1780025 | --- | --- | --- | 1,45 | up   |
| 6015762 | 7355804 | 1759434 | --- | --- | --- | 1,69 | down |
| 6015952 | 7340757 | 1721897 | --- | --- | --- | 1,09 | down |
| 6015957 | 7273744 | 1556972 | --- | --- | --- | 1,03 | up   |
| 6015967 | 7337224 | 1712628 | --- | --- | --- | 1,05 | down |
| 6016017 | 7062436 | 1037652 | --- | --- | --- | 1,79 | down |
| 6016200 | 7071681 | 1060284 | --- | --- | --- | 1,25 | down |
| 6016222 | 7384509 | 1830722 | --- | --- | --- | 1,06 | down |
| 6016241 | 7239939 | 1473791 | --- | --- | --- | 1,27 | down |
| 6016293 | 7132020 | 1206319 | --- | --- | --- | 1,01 | down |
| 6016434 | 7303616 | 1631379 | --- | --- | --- | 1,26 | up   |
| 6016510 | 7374790 | 1808765 | --- | --- | --- | 1,11 | down |
| 6016554 | 7339379 | 1718332 | --- | --- | --- | 1,02 | down |
| 6016624 | 7344530 | 1731570 | --- | --- | --- | 1,14 | up   |
| 6016648 | 7236358 | 1464238 | --- | --- | --- | 1,68 | down |
| 6016779 | 7068259 | 1051604 | --- | --- | --- | 1,50 | up   |
| 6016800 | 7293757 | 1605677 | --- | --- | --- | 1,30 | down |
| 6016889 | 7043379 | 993593  | --- | --- | --- | 1,30 | up   |
| 6016994 | 7276650 | 1564162 | --- | --- | --- | 1,17 | up   |
| 6017010 | 7183182 | 1333577 | --- | --- | --- | 1,33 | down |
| 6017048 | 7097525 | 1121046 | --- | --- | --- | 1,26 | up   |
| 6017065 | 7096924 | 1119606 | --- | --- | --- | 1,12 | down |
| 6017079 | 7253408 | 1505956 | --- | --- | --- | 1,16 | up   |
| 6017157 | 7075424 | 1069288 | --- | --- | --- | 1,24 | down |
| 6017172 | 7249503 | 1496157 | --- | --- | --- | 1,12 | down |

|         |         |         |     |     |     |      |      |
|---------|---------|---------|-----|-----|-----|------|------|
| 6017305 | 7039223 | 983568  | --- | --- | --- | 1,44 | up   |
| 6017388 | 7280743 | 1574503 | --- | --- | --- | 1,24 | down |
| 6017396 | 7186464 | 1341358 | --- | --- | --- | 1,69 | down |
| 6017472 | 7281077 | 1575555 | --- | --- | --- | 1,12 | up   |
| 6017493 | 7101643 | 1131573 | --- | --- | --- | 1,41 | down |
| 6017610 | 7119556 | 1176078 | --- | --- | --- | 1,04 | down |
| 6017639 | 7258520 | 1518894 | --- | --- | --- | 1,12 | down |
| 6017910 | 7049399 | 1008421 | --- | --- | --- | 1,13 | up   |
| 6017911 | 7180861 | 1327219 | --- | --- | --- | 1,30 | up   |
| 6017926 | 7079600 | 1078631 | --- | --- | --- | 2,69 | down |
| 6017936 | 7086522 | 1093951 | --- | --- | --- | 1,53 | up   |
| 6018024 | 7203872 | 1384763 | --- | --- | --- | 1,02 | down |
| 6018059 | 7279555 | 1571953 | --- | --- | --- | 1,22 | down |
| 6018085 | 7032444 | 966741  | --- | --- | --- | 1,30 | up   |
| 6018162 | 7025652 | 950353  | --- | --- | --- | 1,01 | up   |
| 6018309 | 7303616 | 1631357 | --- | --- | --- | 1,03 | down |
| 6018353 | 7319144 | 1670088 | --- | --- | --- | 1,25 | up   |
| 6018658 | 7331434 | 1699210 | --- | --- | --- | 2,17 | up   |
| 6018884 | 7339110 | 1717617 | --- | --- | --- | 1,64 | down |
| 6018947 | 7065655 | 1045267 | --- | --- | --- | 1,32 | down |
| 6018956 | 7092549 | 1109194 | --- | --- | --- | 1,18 | down |
| 6018961 | 7334347 | 1705752 | --- | --- | --- | 1,17 | up   |
| 6019100 | 7050726 | 1011252 | --- | --- | --- | 1,04 | up   |
| 6019119 | 7258323 | 1518473 | --- | --- | --- | 2,49 | down |
| 6019214 | 7339732 | 1719209 | --- | --- | --- | 1,22 | up   |
| 6019371 | 7043535 | 994116  | --- | --- | --- | 1,47 | down |
| 6019484 | 7363674 | 1778412 | --- | --- | --- | 1,54 | down |
| 6019542 | 7248790 | 1494490 | --- | --- | --- | 1,45 | down |
| 6019548 | 7119556 | 1176077 | --- | --- | --- | 1,12 | up   |
| 6019551 | 7188829 | 1346662 | --- | --- | --- | 1,14 | down |
| 6019742 | 7263152 | 1530368 | --- | --- | --- | 1,64 | up   |
| 6019771 | 7321414 | 1675636 | --- | --- | --- | 1,20 | up   |
| 6019982 | 7231835 | 1452280 | --- | --- | --- | 1,10 | down |
| 6019997 | 7319292 | 1670486 | --- | --- | --- | 1,54 | down |
| 6020015 | 7091954 | 1107705 | --- | --- | --- | 1,25 | up   |
| 6020026 | 7233440 | 1456869 | --- | --- | --- | 1,16 | down |
| 6020107 | 7041609 | 989577  | --- | --- | --- | 1,00 | up   |
| 6020110 | 7293234 | 1604356 | --- | --- | --- | 1,01 | up   |
| 6020183 | 7119556 | 1176078 | --- | --- | --- | 1,20 | down |
| 6020225 | 7243363 | 1481615 | --- | --- | --- | 1,25 | down |
| 6020245 | 7376820 | 1813399 | --- | --- | --- | 1,51 | down |
| 6020318 | 7248790 | 1494484 | --- | --- | --- | 1,43 | down |
| 6020425 | 7086966 | 1095244 | --- | --- | --- | 1,27 | up   |
| 6020500 | 7236492 | 1464560 | --- | --- | --- | 1,10 | down |
| 6020510 | 7303616 | 1631336 | --- | --- | --- | 1,10 | up   |
| 6020591 | 7144389 | 1236781 | --- | --- | --- | 1,36 | up   |
| 6020773 | 7287222 | 1589734 | --- | --- | --- | 1,31 | down |
| 6020904 | 7230886 | 1449530 | --- | --- | --- | 1,02 | down |
| 6020929 | 7329135 | 1693500 | --- | --- | --- | 1,09 | up   |
| 6021042 | 7293049 | 1603881 | --- | --- | --- | 1,10 | up   |
| 6021159 | 7189574 | 1348705 | --- | --- | --- | 1,01 | up   |
| 6021204 | 7029395 | 959447  | --- | --- | --- | 1,50 | down |
| 6021216 | 7263248 | 1530602 | --- | --- | --- | 1,52 | up   |
| 6021250 | 7101400 | 1130915 | --- | --- | --- | 1,05 | down |
| 6021251 | 7069253 | 1054162 | --- | --- | --- | 1,38 | down |
| 6021374 | 7290942 | 1599138 | --- | --- | --- | 1,01 | down |

|         |         |         |     |     |     |      |      |
|---------|---------|---------|-----|-----|-----|------|------|
| 6021422 | 7257976 | 1517707 | --- | --- | --- | 1,04 | up   |
| 6021440 | 7057966 | 1026815 | --- | --- | --- | 1,03 | up   |
| 6021485 | 7298920 | 1618823 | --- | --- | --- | 1,20 | up   |
| 6021549 | 7318596 | 1668935 | --- | --- | --- | 1,36 | up   |
| 6021589 | 7038316 | 981462  | --- | --- | --- | 1,26 | down |
| 6021631 | 7243130 | 1480925 | --- | --- | --- | 1,36 | down |
| 6021766 | 7279533 | 1571916 | --- | --- | --- | 1,05 | up   |
| 6021795 | 7371682 | 1800780 | --- | --- | --- | 1,94 | up   |
| 6021871 | 7083030 | 1086250 | --- | --- | --- | 1,06 | down |
| 6021900 | 7040260 | 986069  | --- | --- | --- | 1,06 | down |
| 6022070 | 7217747 | 1417462 | --- | --- | --- | 1,08 | up   |
| 6022109 | 7112225 | 1157559 | --- | --- | --- | 1,72 | down |
| 6022188 | 7217321 | 1416029 | --- | --- | --- | 1,27 | up   |
| 6022193 | 7360486 | 1770938 | --- | --- | --- | 1,16 | down |
| 6022298 | 7274780 | 1559234 | --- | --- | --- | 2,07 | up   |
| 6022347 | 7269637 | 1546244 | --- | --- | --- | 1,95 | down |
| 6022353 | 7279555 | 1571951 | --- | --- | --- | 1,24 | down |
| 6022382 | 7098810 | 1124646 | --- | --- | --- | 3,24 | down |
| 6022447 | 7170764 | 1301488 | --- | --- | --- | 1,33 | down |
| 6022548 | 7025652 | 950326  | --- | --- | --- | 1,32 | down |
| 6022760 | 7228520 | 1443758 | --- | --- | --- | 1,22 | up   |
| 6022811 | 7067670 | 1050313 | --- | --- | --- | 2,01 | up   |
| 6022919 | 7344530 | 1731575 | --- | --- | --- | 1,24 | down |
| 6023024 | 7351953 | 1749880 | --- | --- | --- | 1,29 | down |
| 6023192 | 7368004 | 1789332 | --- | --- | --- | 1,00 | down |
| 6023234 | 7068259 | 1051649 | --- | --- | --- | 1,02 | down |
| 6023270 | 7099294 | 1126098 | --- | --- | --- | 1,39 | up   |
| 6023463 | 7333100 | 1702837 | --- | --- | --- | 1,08 | up   |
| 6023468 | 7189669 | 1348992 | --- | --- | --- | 1,80 | down |
| 6023496 | 7186688 | 1341849 | --- | --- | --- | 1,49 | up   |
| 6023601 | 7030454 | 961554  | --- | --- | --- | 1,72 | down |
| 6023650 | 7319937 | 1672286 | --- | --- | --- | 1,10 | up   |
| 6023728 | 7086664 | 1094281 | --- | --- | --- | 1,28 | up   |
| 6023854 | 7197056 | 1367840 | --- | --- | --- | 1,20 | up   |
| 6023876 | 7143904 | 1235816 | --- | --- | --- | 1,15 | down |
| 6024079 | 7049689 | 1008872 | --- | --- | --- | 1,48 | down |
| 6024204 | 7254040 | 1507581 | --- | --- | --- | 1,23 | down |
| 6024375 | 7255755 | 1511922 | --- | --- | --- | 1,34 | down |
| 6024381 | 7033337 | 969498  | --- | --- | --- | 1,14 | up   |
| 6024433 | 7258670 | 1519338 | --- | --- | --- | 1,52 | up   |
| 6024435 | 7061367 | 1034817 | --- | --- | --- | 1,33 | down |
| 6024604 | 7226241 | 1437780 | --- | --- | --- | 1,22 | up   |
| 6024641 | 7380497 | 1821824 | --- | --- | --- | 1,09 | down |
| 6024660 | 7321029 | 1674804 | --- | --- | --- | 1,71 | down |
| 6024807 | 7070616 | 1057789 | --- | --- | --- | 1,12 | up   |
| 6024943 | 7316644 | 1664056 | --- | --- | --- | 1,01 | up   |
| 6025169 | 7244288 | 1484094 | --- | --- | --- | 1,09 | down |
| 6025180 | 7146000 | 1240656 | --- | --- | --- | 1,33 | up   |
| 6025193 | 7360486 | 1771006 | --- | --- | --- | 1,15 | up   |
| 6025320 | 7180243 | 1325515 | --- | --- | --- | 1,31 | down |
| 6025391 | 7217747 | 1417473 | --- | --- | --- | 1,70 | up   |
| 6025394 | 7246570 | 1489226 | --- | --- | --- | 1,10 | up   |
| 6025432 | 7299512 | 1620553 | --- | --- | --- | 1,10 | up   |
| 6025577 | 7337845 | 1714342 | --- | --- | --- | 1,25 | up   |
| 6025586 | 7349817 | 1744598 | --- | --- | --- | 1,18 | down |
| 6025625 | 7247229 | 1490551 | --- | --- | --- | 1,58 | down |



|         |         |         |     |     |     |      |      |
|---------|---------|---------|-----|-----|-----|------|------|
| 6025659 | 7053874 | 1018315 | --- | --- | --- | 1,02 | down |
| 6025749 | 7349882 | 1744789 | --- | --- | --- | 1,16 | down |
| 6025764 | 7358859 | 1767005 | --- | --- | --- | 1,17 | down |
| 6025805 | 7094130 | 1112869 | --- | --- | --- | 1,37 | down |
| 6025877 | 7064468 | 1042338 | --- | --- | --- | 1,18 | up   |
| 6025888 | 7064732 | 1042909 | --- | --- | --- | 1,49 | down |
| 6025892 | 7325674 | 1685217 | --- | --- | --- | 1,15 | up   |
| 6025897 | 7301879 | 1626621 | --- | --- | --- | 1,04 | up   |
| 6026038 | 7196803 | 1367333 | --- | --- | --- | 1,25 | up   |
| 6026259 | 7340990 | 1722518 | --- | --- | --- | 1,38 | down |
| 6026269 | 7234040 | 1458500 | --- | --- | --- | 1,63 | up   |
| 6026432 | 7280743 | 1574484 | --- | --- | --- | 1,08 | down |
| 6026456 | 7349817 | 1744641 | --- | --- | --- | 1,09 | down |
| 6026457 | 7224035 | 1432400 | --- | --- | --- | 1,37 | down |
| 6026539 | 7181590 | 1329424 | --- | --- | --- | 1,47 | down |
| 6026572 | 7248790 | 1494519 | --- | --- | --- | 1,36 | up   |
| 6026632 | 7095021 | 1115118 | --- | --- | --- | 1,27 | down |
| 6026693 | 7360486 | 1770973 | --- | --- | --- | 1,05 | down |
| 6026889 | 7083030 | 1086272 | --- | --- | --- | 1,02 | up   |
| 6026985 | 7228848 | 1444755 | --- | --- | --- | 1,19 | up   |
| 6027003 | 7060195 | 1031960 | --- | --- | --- | 1,72 | up   |
| 6027004 | 7096924 | 1119625 | --- | --- | --- | 1,47 | down |
| 6027227 | 7235323 | 1461555 | --- | --- | --- | 1,52 | down |
| 6027299 | 7174281 | 1310907 | --- | --- | --- | 1,03 | down |
| 6027329 | 7031774 | 964715  | --- | --- | --- | 1,36 | up   |
| 6027476 | 7111361 | 1155622 | --- | --- | --- | 1,10 | up   |
| 6027547 | 7167507 | 1293108 | --- | --- | --- | 1,12 | down |
| 6027578 | 7258545 | 1518926 | --- | --- | --- | 2,22 | down |
| 6027579 | 7073854 | 1065622 | --- | --- | --- | 1,29 | up   |
| 6027598 | 7339379 | 1718313 | --- | --- | --- | 1,29 | up   |
| 6027664 | 7169599 | 1298451 | --- | --- | --- | 1,26 | up   |
| 6027753 | 7307721 | 1642000 | --- | --- | --- | 1,11 | down |
| 6027793 | 7062173 | 1037024 | --- | --- | --- | 1,02 | up   |
| 6027962 | 7065655 | 1045275 | --- | --- | --- | 1,13 | down |
| 6027997 | 7350993 | 1747552 | --- | --- | --- | 1,30 | up   |
| 6028123 | 7184850 | 1337599 | --- | --- | --- | 1,09 | up   |
| 6028209 | 7142416 | 1231798 | --- | --- | --- | 1,70 | up   |
| 6028372 | 7112225 | 1157593 | --- | --- | --- | 1,00 | up   |
| 6028400 | 7098810 | 1124651 | --- | --- | --- | 1,05 | up   |
| 6028441 | 7043379 | 993650  | --- | --- | --- | 1,28 | down |
| 6028455 | 7279533 | 1571915 | --- | --- | --- | 1,35 | up   |
| 6028593 | 7213908 | 1407677 | --- | --- | --- | 1,06 | down |
| 6028626 | 7352635 | 1751442 | --- | --- | --- | 1,25 | up   |
| 6028718 | 7276762 | 1564497 | --- | --- | --- | 1,03 | down |
| 6028738 | 7243653 | 1482554 | --- | --- | --- | 1,34 | up   |
| 6028952 | 7287222 | 1589723 | --- | --- | --- | 1,00 | up   |
| 6028977 | 7141061 | 1228678 | --- | --- | --- | 1,18 | down |
| 6029100 | 7068259 | 1051615 | --- | --- | --- | 1,26 | down |
| 6029102 | 7292517 | 1602533 | --- | --- | --- | 1,16 | down |
| 6029141 | 7112562 | 1158607 | --- | --- | --- | 1,26 | down |
| 6029143 | 7029770 | 960149  | --- | --- | --- | 1,04 | up   |
| 6029161 | 7293402 | 1604720 | --- | --- | --- | 1,10 | up   |
| 6029240 | 7374630 | 1808320 | --- | --- | --- | 1,24 | up   |
| 6029416 | 7101258 | 1130576 | --- | --- | --- | 1,45 | down |
| 6029424 | 7287222 | 1589745 | --- | --- | --- | 1,18 | down |
| 6029425 | 7331829 | 1700172 | --- | --- | --- | 1,41 | down |

|         |         |         |     |     |     |      |      |
|---------|---------|---------|-----|-----|-----|------|------|
| 6029434 | 7218728 | 1419926 | --- | --- | --- | 1,49 | down |
| 6029485 | 7196029 | 1365641 | --- | --- | --- | 1,29 | down |
| 6029494 | 7054958 | 1020584 | --- | --- | --- | 1,09 | up   |
| 6029499 | 7353441 | 1753344 | --- | --- | --- | 1,08 | down |
| 6029539 | 7258323 | 1518477 | --- | --- | --- | 5,12 | down |
| 6029597 | 7038530 | 981864  | --- | --- | --- | 1,18 | up   |
| 6029622 | 7283819 | 1582119 | --- | --- | --- | 1,37 | down |
| 6029947 | 7065827 | 1045721 | --- | --- | --- | 1,11 | up   |
| 6029953 | 7084193 | 1089096 | --- | --- | --- | 1,42 | up   |
| 6030006 | 7359453 | 1768448 | --- | --- | --- | 1,33 | down |
| 6030073 | 7189574 | 1348697 | --- | --- | --- | 1,17 | down |
| 6030108 | 7357890 | 1764386 | --- | --- | --- | 1,13 | up   |
| 6030147 | 7071969 | 1060903 | --- | --- | --- | 1,77 | down |
| 6030314 | 7374740 | 1808632 | --- | --- | --- | 2,23 | up   |
| 6030347 | 7321414 | 1675637 | --- | --- | --- | 1,03 | up   |
| 6030378 | 7224182 | 1432759 | --- | --- | --- | 1,17 | up   |
| 6030527 | 7261766 | 1527158 | --- | --- | --- | 1,48 | down |
| 6030545 | 7207069 | 1392018 | --- | --- | --- | 2,21 | down |
| 6030818 | 7277719 | 1567090 | --- | --- | --- | 1,05 | down |
| 6030825 | 7307721 | 1642008 | --- | --- | --- | 1,26 | down |
| 6030918 | 7139026 | 1223496 | --- | --- | --- | 1,06 | up   |
| 6030922 | 7323560 | 1680030 | --- | --- | --- | 1,19 | down |
| 6030938 | 7293757 | 1605676 | --- | --- | --- | 1,06 | up   |
| 6031216 | 7320337 | 1673320 | --- | --- | --- | 1,05 | up   |
| 6031237 | 7083030 | 1086252 | --- | --- | --- | 1,12 | down |
| 6031246 | 7243603 | 1482257 | --- | --- | --- | 1,45 | down |
| 6031256 | 7052331 | 1014570 | --- | --- | --- | 1,24 | down |
| 6031388 | 7266706 | 1538746 | --- | --- | --- | 1,27 | down |
| 6031478 | 7383501 | 1828201 | --- | --- | --- | 2,23 | up   |
| 6031535 | 7115880 | 1166837 | --- | --- | --- | 2,18 | down |
| 6031622 | 7180732 | 1326720 | --- | --- | --- | 1,38 | down |
| 6031640 | 7172373 | 1305585 | --- | --- | --- | 1,02 | down |
| 6031644 | 7139708 | 1225059 | --- | --- | --- | 1,31 | down |
| 6031759 | 7049399 | 1008355 | --- | --- | --- | 1,26 | down |
| 6031797 | 7075424 | 1069301 | --- | --- | --- | 1,37 | up   |
| 6031834 | 7329135 | 1693490 | --- | --- | --- | 1,00 | up   |
| 6031876 | 7108300 | 1147904 | --- | --- | --- | 1,03 | up   |
| 6031900 | 7096859 | 1119303 | --- | --- | --- | 1,01 | down |
| 6031999 | 7359551 | 1768626 | --- | --- | --- | 1,16 | up   |
| 6032048 | 7339387 | 1718392 | --- | --- | --- | 1,20 | up   |
| 6032132 | 7299512 | 1620554 | --- | --- | --- | 1,13 | down |
| 6032136 | 7291054 | 1599391 | --- | --- | --- | 1,10 | up   |
| 6032295 | 7199476 | 1374550 | --- | --- | --- | 1,13 | up   |
| 6032321 | 7038153 | 981154  | --- | --- | --- | 4,76 | up   |
| 6032344 | 7058813 | 1028900 | --- | --- | --- | 1,22 | up   |
| 6032509 | 7277783 | 1567465 | --- | --- | --- | 1,47 | down |
| 6032794 | 7303616 | 1631385 | --- | --- | --- | 1,06 | up   |
| 6033022 | 7071714 | 1060357 | --- | --- | --- | 1,41 | up   |
| 6033034 | 7244290 | 1484145 | --- | --- | --- | 2,88 | up   |
| 6033260 | 7373678 | 1805863 | --- | --- | --- | 1,32 | up   |
| 6033282 | 7167507 | 1293130 | --- | --- | --- | 1,33 | down |
| 6033284 | 7156170 | 1266282 | --- | --- | --- | 1,69 | up   |
| 6033300 | 7070836 | 1058332 | --- | --- | --- | 1,46 | down |
| 6033372 | 7245921 | 1487689 | --- | --- | --- | 1,40 | down |
| 6033403 | 7025652 | 950338  | --- | --- | --- | 1,02 | down |
| 6033406 | 7181016 | 1327780 | --- | --- | --- | 1,25 | up   |

|         |         |         |     |     |     |      |      |
|---------|---------|---------|-----|-----|-----|------|------|
| 6033433 | 7350489 | 1746125 | --- | --- | --- | 1,06 | down |
| 6033561 | 7331829 | 1700186 | --- | --- | --- | 1,24 | down |
| 6033587 | 7080106 | 1079749 | --- | --- | --- | 1,46 | down |
| 6033612 | 7069830 | 1055604 | --- | --- | --- | 1,80 | down |
| 6033743 | 7212735 | 1405026 | --- | --- | --- | 1,16 | down |
| 6033832 | 7225553 | 1435984 | --- | --- | --- | 1,19 | down |
| 6033850 | 7274780 | 1559241 | --- | --- | --- | 1,48 | down |
| 6033902 | 7033672 | 970357  | --- | --- | --- | 1,04 | up   |
| 6033910 | 7351951 | 1749838 | --- | --- | --- | 1,05 | down |
| 6033913 | 7082098 | 1084121 | --- | --- | --- | 1,15 | up   |
| 6033961 | 7167507 | 1293145 | --- | --- | --- | 1,00 | up   |
| 6034198 | 7341546 | 1723964 | --- | --- | --- | 1,10 | up   |
| 6034240 | 7370412 | 1796835 | --- | --- | --- | 1,26 | up   |
| 6034297 | 7094139 | 1112919 | --- | --- | --- | 1,16 | down |
| 6034310 | 7332970 | 1702513 | --- | --- | --- | 1,22 | down |
| 6034320 | 7033616 | 970211  | --- | --- | --- | 1,26 | down |
| 6034381 | 7065655 | 1045253 | --- | --- | --- | 1,19 | up   |
| 6034499 | 7329075 | 1693378 | --- | --- | --- | 1,08 | down |
| 6034525 | 7245874 | 1487595 | --- | --- | --- | 1,03 | down |
| 6034541 | 7188138 | 1345026 | --- | --- | --- | 1,40 | up   |
| 6034593 | 7092965 | 1110188 | --- | --- | --- | 1,20 | up   |
| 6034633 | 7384073 | 1829461 | --- | --- | --- | 1,07 | down |
| 6034634 | 7364346 | 1779993 | --- | --- | --- | 1,06 | down |
| 6034747 | 7234195 | 1458981 | --- | --- | --- | 1,10 | up   |
| 6034852 | 7368954 | 1792774 | --- | --- | --- | 1,97 | down |
| 6034856 | 7321029 | 1674804 | --- | --- | --- | 1,22 | up   |
| 6034981 | 7049399 | 1008419 | --- | --- | --- | 1,01 | up   |
| 6034989 | 7330238 | 1695945 | --- | --- | --- | 2,44 | up   |
| 6035024 | 7276231 | 1563102 | --- | --- | --- | 1,05 | up   |
| 6035127 | 7096589 | 1118530 | --- | --- | --- | 1,13 | down |
| 6035135 | 7266706 | 1538746 | --- | --- | --- | 1,70 | up   |
| 6035219 | 7104955 | 1140119 | --- | --- | --- | 1,15 | up   |
| 6035259 | 7245874 | 1487589 | --- | --- | --- | 2,11 | up   |
| 6035348 | 7341958 | 1724894 | --- | --- | --- | 1,76 | up   |
| 6035361 | 7197638 | 1369572 | --- | --- | --- | 1,67 | down |
| 6035515 | 7273251 | 1555942 | --- | --- | --- | 1,26 | down |
| 6035565 | 7186305 | 1341003 | --- | --- | --- | 1,43 | up   |
| 6035676 | 7113483 | 1161015 | --- | --- | --- | 1,10 | up   |
| 6035696 | 7136062 | 1216293 | --- | --- | --- | 1,83 | down |
| 6035769 | 7039223 | 983577  | --- | --- | --- | 1,07 | up   |
| 6035837 | 7373678 | 1805867 | --- | --- | --- | 1,14 | up   |
| 6035864 | 7314115 | 1657313 | --- | --- | --- | 2,28 | up   |
| 6035941 | 7243130 | 1480838 | --- | --- | --- | 1,05 | down |
| 6036031 | 7364346 | 1780008 | --- | --- | --- | 1,17 | up   |
| 6036035 | 7374790 | 1808786 | --- | --- | --- | 1,04 | down |
| 6036214 | 7198002 | 1370441 | --- | --- | --- | 1,30 | up   |
| 6036433 | 7100307 | 1128385 | --- | --- | --- | 1,17 | down |
| 6036474 | 7174114 | 1310431 | --- | --- | --- | 1,18 | up   |
| 6036546 | 7115880 | 1166823 | --- | --- | --- | 1,01 | down |
| 6036806 | 7255522 | 1511454 | --- | --- | --- | 1,34 | down |
| 6036824 | 7188138 | 1345026 | --- | --- | --- | 1,06 | down |
| 6036855 | 7244261 | 1483898 | --- | --- | --- | 1,05 | down |
| 6036916 | 7279586 | 1572072 | --- | --- | --- | 1,16 | down |
| 6037002 | 7243130 | 1480966 | --- | --- | --- | 1,11 | down |
| 6037165 | 7190317 | 1350513 | --- | --- | --- | 2,15 | down |
| 6037250 | 7092549 | 1109191 | --- | --- | --- | 1,83 | down |

|         |         |         |     |     |     |      |      |
|---------|---------|---------|-----|-----|-----|------|------|
| 6037330 | 7181442 | 1328885 | --- | --- | --- | 1,43 | up   |
| 6037382 | 7383655 | 1828573 | --- | --- | --- | 1,59 | up   |
| 6037398 | 7059765 | 1030964 | --- | --- | --- | 1,27 | up   |
| 6037417 | 7364346 | 1780015 | --- | --- | --- | 1,62 | down |
| 6037449 | 7174149 | 1310524 | --- | --- | --- | 1,03 | down |
| 6037459 | 7177520 | 1318613 | --- | --- | --- | 1,09 | up   |
| 6037470 | 7225553 | 1435982 | --- | --- | --- | 1,03 | down |
| 6037609 | 7320337 | 1673323 | --- | --- | --- | 1,18 | up   |
| 6037659 | 7322020 | 1676644 | --- | --- | --- | 1,48 | up   |
| 6037738 | 7065655 | 1045253 | --- | --- | --- | 1,03 | up   |
| 6037814 | 7228530 | 1443902 | --- | --- | --- | 1,30 | up   |
| 6038160 | 7144389 | 1236776 | --- | --- | --- | 1,33 | up   |
| 6038292 | 7330396 | 1696390 | --- | --- | --- | 1,58 | down |
| 6038346 | 7182056 | 1330579 | --- | --- | --- | 1,81 | down |
| 6038521 | 7139026 | 1223505 | --- | --- | --- | 1,18 | up   |
| 6038752 | 7049399 | 1008361 | --- | --- | --- | 2,31 | down |
| 6038804 | 7120827 | 1179351 | --- | --- | --- | 1,50 | up   |
| 6038837 | 7244288 | 1484135 | --- | --- | --- | 1,22 | down |
| 6039258 | 7138255 | 1221710 | --- | --- | --- | 1,27 | up   |
| 6039348 | 7155286 | 1263910 | --- | --- | --- | 1,90 | up   |
| 6039590 | 7258784 | 1519672 | --- | --- | --- | 1,28 | down |
| 6039614 | 7378997 | 1818660 | --- | --- | --- | 1,09 | down |
| 6039616 | 7071616 | 1060070 | --- | --- | --- | 1,13 | up   |
| 6039619 | 7058713 | 1028656 | --- | --- | --- | 1,24 | down |
| 6039720 | 7139007 | 1223469 | --- | --- | --- | 1,87 | down |
| 6039733 | 7363568 | 1778132 | --- | --- | --- | 1,29 | up   |
| 6039767 | 7123357 | 1185595 | --- | --- | --- | 1,01 | down |
| 6039917 | 7211389 | 1402113 | --- | --- | --- | 1,87 | down |
| 6039929 | 7333333 | 1703402 | --- | --- | --- | 1,04 | down |
| 6040300 | 7174149 | 1310531 | --- | --- | --- | 1,04 | up   |
| 6040323 | 7374790 | 1808779 | --- | --- | --- | 1,10 | down |
| 6040324 | 7236358 | 1464235 | --- | --- | --- | 1,09 | down |
| 6040385 | 7049399 | 1008398 | --- | --- | --- | 1,61 | down |
| 6040394 | 7097525 | 1121071 | --- | --- | --- | 1,19 | up   |
| 6040428 | 7157341 | 1269220 | --- | --- | --- | 1,18 | down |
| 6040464 | 7243647 | 1482488 | --- | --- | --- | 1,05 | up   |
| 6040486 | 7039223 | 983566  | --- | --- | --- | 1,13 | up   |
| 6040490 | 7052331 | 1014572 | --- | --- | --- | 1,06 | up   |
| 6040517 | 7025652 | 950349  | --- | --- | --- | 1,29 | down |
| 6040534 | 7112566 | 1158631 | --- | --- | --- | 1,25 | up   |
| 6040716 | 7260613 | 1524271 | --- | --- | --- | 1,10 | up   |
| 6040819 | 7101258 | 1130559 | --- | --- | --- | 1,24 | up   |
| 6040829 | 7265952 | 1536975 | --- | --- | --- | 1,81 | up   |
| 6041021 | 7329135 | 1693496 | --- | --- | --- | 1,08 | up   |
| 6041176 | 7033504 | 969866  | --- | --- | --- | 1,08 | up   |
| 6041217 | 7025652 | 950262  | --- | --- | --- | 1,01 | down |
| 6041239 | 7297274 | 1614612 | --- | --- | --- | 1,49 | down |
| 6041298 | 7314270 | 1657731 | --- | --- | --- | 1,09 | up   |
| 6041316 | 7272110 | 1553084 | --- | --- | --- | 1,23 | up   |
| 6041353 | 7049399 | 1008425 | --- | --- | --- | 1,38 | down |
| 6041395 | 7065655 | 1045274 | --- | --- | --- | 1,22 | up   |
| 6041476 | 7099030 | 1125343 | --- | --- | --- | 1,20 | up   |
| 6041564 | 7069830 | 1055631 | --- | --- | --- | 1,03 | up   |
| 6041608 | 7233921 | 1458156 | --- | --- | --- | 1,77 | down |
| 6041636 | 7133181 | 1209151 | --- | --- | --- | 1,07 | up   |
| 6041832 | 7137646 | 1220435 | --- | --- | --- | 1,19 | down |

|         |         |         |     |     |     |      |      |
|---------|---------|---------|-----|-----|-----|------|------|
| 6041873 | 7236395 | 1464344 | --- | --- | --- | 1,56 | down |
| 6041926 | 7349817 | 1744643 | --- | --- | --- | 1,15 | down |
| 6042008 | 7071616 | 1060072 | --- | --- | --- | 1,25 | down |
| 6042224 | 7240569 | 1475483 | --- | --- | --- | 1,16 | up   |
| 6042325 | 7161992 | 1280154 | --- | --- | --- | 1,18 | down |
| 6042345 | 7286807 | 1588833 | --- | --- | --- | 1,11 | up   |
| 6042481 | 7217747 | 1417472 | --- | --- | --- | 1,23 | up   |
| 6042522 | 7274892 | 1559572 | --- | --- | --- | 1,03 | up   |
| 6042566 | 7052385 | 1014798 | --- | --- | --- | 1,04 | up   |
| 6042673 | 7214605 | 1409395 | --- | --- | --- | 1,12 | up   |
| 6042744 | 7116614 | 1168799 | --- | --- | --- | 2,14 | down |
| 6042769 | 7101643 | 1131580 | --- | --- | --- | 1,08 | up   |
| 6042801 | 7314270 | 1657753 | --- | --- | --- | 1,20 | down |
| 6042805 | 7274892 | 1559547 | --- | --- | --- | 1,26 | down |
| 6042831 | 7279568 | 1572005 | --- | --- | --- | 1,27 | up   |
| 6042941 | 7165954 | 1288770 | --- | --- | --- | 1,15 | down |
| 6043020 | 7031774 | 964766  | --- | --- | --- | 1,23 | down |
| 6043042 | 7108062 | 1147136 | --- | --- | --- | 1,39 | down |
| 6043047 | 7087965 | 1098057 | --- | --- | --- | 1,16 | down |
| 6043083 | 7357815 | 1764130 | --- | --- | --- | 1,41 | up   |
| 6043196 | 7329135 | 1693501 | --- | --- | --- | 1,38 | down |
| 6043309 | 7356115 | 1760126 | --- | --- | --- | 1,27 | up   |
| 6043338 | 7070836 | 1058339 | --- | --- | --- | 1,40 | up   |
| 6043357 | 7104977 | 1140168 | --- | --- | --- | 1,26 | up   |
| 6043407 | 7369939 | 1795601 | --- | --- | --- | 1,50 | up   |
| 6043422 | 7101258 | 1130564 | --- | --- | --- | 1,42 | up   |
| 6043561 | 7058713 | 1028655 | --- | --- | --- | 1,09 | down |
| 6043702 | 7243098 | 1480753 | --- | --- | --- | 1,45 | down |
| 6043745 | 7037235 | 978573  | --- | --- | --- | 1,16 | up   |
| 6043746 | 7166497 | 1290380 | --- | --- | --- | 1,07 | up   |
| 6043799 | 7236395 | 1464354 | --- | --- | --- | 1,04 | up   |
| 6043853 | 7312566 | 1653305 | --- | --- | --- | 1,73 | down |
| 6043898 | 7122131 | 1182683 | --- | --- | --- | 1,12 | up   |
| 6044147 | 7115880 | 1166840 | --- | --- | --- | 1,02 | down |
| 6044165 | 7052813 | 1015935 | --- | --- | --- | 1,11 | down |
| 6044296 | 7352046 | 1750037 | --- | --- | --- | 1,78 | down |
| 6044396 | 7075424 | 1069285 | --- | --- | --- | 1,28 | up   |
| 6044416 | 7186688 | 1341847 | --- | --- | --- | 1,03 | up   |
| 6044618 | 7373678 | 1805864 | --- | --- | --- | 1,53 | up   |
| 6044743 | 7053874 | 1018322 | --- | --- | --- | 1,30 | up   |
| 6044830 | 7293402 | 1604808 | --- | --- | --- | 1,82 | down |
| 6044859 | 7156052 | 1265760 | --- | --- | --- | 1,11 | up   |
| 6044866 | 7136963 | 1218767 | --- | --- | --- | 2,05 | up   |
| 6044868 | 7331434 | 1699212 | --- | --- | --- | 1,69 | down |
| 6044886 | 7248790 | 1494492 | --- | --- | --- | 1,12 | up   |
| 6044938 | 7240569 | 1475397 | --- | --- | --- | 1,14 | up   |
| 6044993 | 7088164 | 1098459 | --- | --- | --- | 1,50 | up   |
| 6045049 | 7141061 | 1228643 | --- | --- | --- | 1,25 | down |
| 6045128 | 7034756 | 973216  | --- | --- | --- | 1,07 | down |
| 6045347 | 7133612 | 1210266 | --- | --- | --- | 1,13 | down |
| 6045585 | 7307721 | 1642014 | --- | --- | --- | 1,05 | up   |
| 6045851 | 7297274 | 1614664 | --- | --- | --- | 1,07 | down |
| 6045891 | 7087282 | 1096212 | --- | --- | --- | 1,65 | down |
| 6046029 | 7343092 | 1727649 | --- | --- | --- | 1,01 | down |
| 6046035 | 7356333 | 1760495 | --- | --- | --- | 1,32 | down |
| 6046105 | 7213908 | 1407680 | --- | --- | --- | 1,10 | up   |

|         |         |         |     |     |     |      |      |
|---------|---------|---------|-----|-----|-----|------|------|
| 6046132 | 7092549 | 1109124 | --- | --- | --- | 1,01 | down |
| 6046182 | 7320337 | 1673309 | --- | --- | --- | 1,08 | down |
| 6046417 | 7063873 | 1040650 | --- | --- | --- | 1,15 | down |
| 6046435 | 7331413 | 1699130 | --- | --- | --- | 1,01 | up   |
| 6046510 | 7171034 | 1302272 | --- | --- | --- | 1,19 | down |
| 6046579 | 7211343 | 1401976 | --- | --- | --- | 1,67 | down |
| 6046639 | 7189574 | 1348711 | --- | --- | --- | 1,12 | down |
| 6046702 | 7042382 | 991286  | --- | --- | --- | 1,57 | up   |
| 6046815 | 7264797 | 1534428 | --- | --- | --- | 1,06 | up   |
| 6046871 | 7193513 | 1359467 | --- | --- | --- | 1,17 | down |
| 6046879 | 7192696 | 1357182 | --- | --- | --- | 1,04 | down |
| 6047044 | 7376566 | 1812848 | --- | --- | --- | 1,08 | down |
| 6047074 | 7380497 | 1821870 | --- | --- | --- | 1,94 | down |
| 6047158 | 7380497 | 1821824 | --- | --- | --- | 1,00 | up   |
| 6047165 | 7368613 | 1791623 | --- | --- | --- | 1,12 | down |
| 6047308 | 7069142 | 1053876 | --- | --- | --- | 1,13 | down |
| 6047403 | 7196233 | 1366103 | --- | --- | --- | 2,18 | up   |
| 6047405 | 7325416 | 1684603 | --- | --- | --- | 1,54 | down |
| 6047499 | 7207069 | 1392008 | --- | --- | --- | 1,15 | up   |
| 6047545 | 7244288 | 1484135 | --- | --- | --- | 1,29 | up   |
| 6047696 | 7308679 | 1644238 | --- | --- | --- | 1,06 | up   |
| 6047753 | 7373633 | 1805703 | --- | --- | --- | 1,03 | up   |
| 6047761 | 7136062 | 1216276 | --- | --- | --- | 1,17 | up   |
| 6047767 | 7150631 | 1252186 | --- | --- | --- | 1,60 | up   |
| 6047879 | 7122486 | 1183425 | --- | --- | --- | 1,24 | down |
| 6047942 | 7331297 | 1698810 | --- | --- | --- | 1,02 | up   |
| 6047977 | 7226241 | 1437801 | --- | --- | --- | 1,20 | up   |
| 6048123 | 7203872 | 1384786 | --- | --- | --- | 1,08 | up   |
| 6048138 | 7150348 | 1251413 | --- | --- | --- | 1,44 | down |
| 6048193 | 7240569 | 1475517 | --- | --- | --- | 1,01 | down |
| 6048230 | 7226241 | 1437790 | --- | --- | --- | 1,01 | up   |
| 6048246 | 7248790 | 1494538 | --- | --- | --- | 1,07 | down |
| 6048312 | 7080731 | 1080970 | --- | --- | --- | 1,26 | up   |
| 6048342 | 7153589 | 1259069 | --- | --- | --- | 2,01 | down |
| 6048344 | 7359453 | 1768458 | --- | --- | --- | 1,06 | down |
| 6048404 | 7359551 | 1768623 | --- | --- | --- | 1,23 | up   |
| 6048431 | 7196029 | 1365626 | --- | --- | --- | 1,05 | up   |
| 6048451 | 7107066 | 1144778 | --- | --- | --- | 1,07 | up   |
| 6048460 | 7371643 | 1800650 | --- | --- | --- | 1,26 | up   |
| 6048540 | 7095262 | 1115635 | --- | --- | --- | 1,12 | down |
| 6048589 | 7034486 | 972509  | --- | --- | --- | 1,27 | down |
| 6048664 | 7146000 | 1240656 | --- | --- | --- | 1,30 | up   |
| 6048689 | 7340304 | 1720867 | --- | --- | --- | 1,61 | down |
| 6048696 | 7062436 | 1037672 | --- | --- | --- | 1,56 | down |
| 6048699 | 7253272 | 1505515 | --- | --- | --- | 1,13 | down |
| 6048985 | 7280743 | 1574538 | --- | --- | --- | 1,13 | up   |
| 6048994 | 7263152 | 1530371 | --- | --- | --- | 1,03 | up   |
| 6049021 | 7097525 | 1121065 | --- | --- | --- | 1,93 | up   |
| 6049038 | 7243647 | 1482432 | --- | --- | --- | 1,46 | up   |
| 6049080 | 7286807 | 1588823 | --- | --- | --- | 1,50 | down |
| 6049126 | 7108551 | 1148700 | --- | --- | --- | 1,01 | down |
| 6049219 | 7339732 | 1719202 | --- | --- | --- | 1,50 | down |
| 6049246 | 7362184 | 1774822 | --- | --- | --- | 1,32 | down |
| 6049297 | 7267802 | 1541874 | --- | --- | --- | 1,14 | up   |
| 6049490 | 7186305 | 1341015 | --- | --- | --- | 1,05 | down |
| 6049536 | 7086966 | 1095266 | --- | --- | --- | 1,02 | down |

|         |         |         |     |     |     |      |      |
|---------|---------|---------|-----|-----|-----|------|------|
| 6049706 | 7188681 | 1346294 | --- | --- | --- | 1,07 | down |
| 6049814 | 7319259 | 1670398 | --- | --- | --- | 1,32 | down |
| 6049895 | 7147809 | 1245458 | --- | --- | --- | 1,07 | up   |
| 6049992 | 7148978 | 1248501 | --- | --- | --- | 1,18 | up   |
| 6050045 | 7263152 | 1530358 | --- | --- | --- | 1,30 | up   |
| 6050126 | 7062927 | 1038641 | --- | --- | --- | 1,38 | down |
| 6050334 | 7099030 | 1125341 | --- | --- | --- | 1,57 | down |
| 6050391 | 7053874 | 1018317 | --- | --- | --- | 1,02 | up   |
| 6050554 | 7052385 | 1014780 | --- | --- | --- | 2,00 | down |
| 6050591 | 7292810 | 1603254 | --- | --- | --- | 1,10 | up   |
| 6050598 | 7373678 | 1805852 | --- | --- | --- | 1,17 | up   |
| 6050635 | 7277783 | 1567463 | --- | --- | --- | 1,10 | up   |
| 6050838 | 7058713 | 1028662 | --- | --- | --- | 1,04 | down |
| 6050873 | 7249503 | 1496210 | --- | --- | --- | 1,31 | up   |
| 6051037 | 7313411 | 1655443 | --- | --- | --- | 1,19 | down |
| 6051065 | 7165954 | 1288766 | --- | --- | --- | 1,31 | down |
| 6051155 | 7092549 | 1109158 | --- | --- | --- | 1,18 | up   |
| 6051357 | 7340304 | 1720851 | --- | --- | --- | 1,36 | down |
| 6051360 | 7376206 | 1811977 | --- | --- | --- | 1,02 | down |
| 6051450 | 7132834 | 1208325 | --- | --- | --- | 1,25 | up   |
| 6051454 | 7273744 | 1557044 | --- | --- | --- | 1,00 | up   |
| 6051650 | 7341546 | 1723939 | --- | --- | --- | 1,61 | up   |
| 6051747 | 7149817 | 1250309 | --- | --- | --- | 2,10 | down |
| 6051815 | 7080106 | 1079726 | --- | --- | --- | 1,09 | up   |
| 6051833 | 7037764 | 980104  | --- | --- | --- | 1,21 | down |
| 6051897 | 7112225 | 1157597 | --- | --- | --- | 1,43 | down |
| 6051976 | 7176456 | 1315807 | --- | --- | --- | 1,09 | down |
| 6051996 | 7380497 | 1821849 | --- | --- | --- | 1,02 | up   |
| 6052013 | 7344702 | 1732146 | --- | --- | --- | 2,09 | up   |
| 6052209 | 7344530 | 1731566 | --- | --- | --- | 1,10 | down |
| 6052557 | 7253408 | 1505941 | --- | --- | --- | 1,13 | down |
| 6052804 | 7346066 | 1735283 | --- | --- | --- | 1,08 | up   |
| 6052831 | 7064134 | 1041441 | --- | --- | --- | 1,92 | down |
| 6052854 | 7166497 | 1290349 | --- | --- | --- | 1,03 | up   |
| 6052949 | 7337224 | 1712622 | --- | --- | --- | 1,11 | up   |
| 6053279 | 7305674 | 1636852 | --- | --- | --- | 1,49 | up   |
| 6053300 | 7056333 | 1023679 | --- | --- | --- | 1,17 | up   |
| 6053352 | 7097454 | 1120882 | --- | --- | --- | 1,09 | up   |
| 6053389 | 7357890 | 1764387 | --- | --- | --- | 1,05 | down |
| 6053408 | 7186305 | 1341002 | --- | --- | --- | 2,21 | down |
| 6053413 | 7249503 | 1496164 | --- | --- | --- | 1,17 | up   |
| 6053420 | 7340990 | 1722506 | --- | --- | --- | 1,03 | down |
| 6053538 | 7097454 | 1120883 | --- | --- | --- | 1,30 | down |
| 6053624 | 7050557 | 1010793 | --- | --- | --- | 1,04 | up   |
| 6053629 | 7373634 | 1805724 | --- | --- | --- | 1,04 | up   |
| 6053698 | 7337845 | 1714351 | --- | --- | --- | 1,45 | down |
| 6053767 | 7369939 | 1795597 | --- | --- | --- | 1,54 | up   |
| 6053803 | 7341397 | 1723646 | --- | --- | --- | 1,05 | down |
| 6053862 | 7180243 | 1325507 | --- | --- | --- | 1,15 | up   |
| 6053987 | 7340757 | 1721885 | --- | --- | --- | 1,24 | up   |
| 6053998 | 7059702 | 1030770 | --- | --- | --- | 1,06 | down |
| 6054116 | 7293757 | 1605693 | --- | --- | --- | 1,14 | up   |
| 6054121 | 7291054 | 1599399 | --- | --- | --- | 1,17 | down |
| 6054209 | 7358048 | 1764822 | --- | --- | --- | 1,37 | up   |
| 6054216 | 7258520 | 1518879 | --- | --- | --- | 1,06 | up   |
| 6054290 | 7380497 | 1821852 | --- | --- | --- | 1,15 | up   |

|         |         |         |     |     |     |      |      |
|---------|---------|---------|-----|-----|-----|------|------|
| 6054306 | 7327650 | 1689694 | --- | --- | --- | 1,08 | up   |
| 6054409 | 7297589 | 1615620 | --- | --- | --- | 1,30 | up   |
| 6054469 | 7157341 | 1269261 | --- | --- | --- | 1,12 | up   |
| 6054557 | 7061367 | 1034817 | --- | --- | --- | 1,35 | down |
| 6054696 | 7060851 | 1033440 | --- | --- | --- | 1,72 | down |
| 6054813 | 7380497 | 1821827 | --- | --- | --- | 1,13 | up   |
| 6054898 | 7068259 | 1051655 | --- | --- | --- | 1,79 | down |
| 6054929 | 7373678 | 1805857 | --- | --- | --- | 1,31 | down |
| 6054932 | 7176456 | 1315836 | --- | --- | --- | 1,12 | up   |
| 6055098 | 7266706 | 1538744 | --- | --- | --- | 1,42 | down |
| 6055145 | 7038669 | 982187  | --- | --- | --- | 1,16 | up   |
| 6055232 | 7067212 | 1049227 | --- | --- | --- | 1,09 | up   |
| 6055296 | 7258323 | 1518481 | --- | --- | --- | 4,85 | down |
| 6055386 | 7041609 | 989550  | --- | --- | --- | 1,41 | up   |
| 6055442 | 7240569 | 1475524 | --- | --- | --- | 1,02 | down |
| 6055562 | 7064134 | 1041434 | --- | --- | --- | 1,08 | up   |
| 6055661 | 7379957 | 1820632 | --- | --- | --- | 1,39 | down |
| 6055759 | 7360325 | 1770510 | --- | --- | --- | 1,05 | down |
| 6055808 | 7210600 | 1400516 | --- | --- | --- | 1,21 | down |
| 6055821 | 7380497 | 1821836 | --- | --- | --- | 2,11 | down |
| 6055824 | 7037806 | 980239  | --- | --- | --- | 1,03 | up   |
| 6055865 | 7339379 | 1718315 | --- | --- | --- | 1,30 | up   |
| 6055942 | 7143455 | 1234711 | --- | --- | --- | 1,05 | down |
| 6055988 | 7059961 | 1031398 | --- | --- | --- | 1,49 | down |
| 6056051 | 7302786 | 1628869 | --- | --- | --- | 1,52 | up   |
| 6056142 | 7274931 | 1559713 | --- | --- | --- | 1,01 | down |
| 6056326 | 7101400 | 1130926 | --- | --- | --- | 1,47 | up   |
| 6056391 | 7344702 | 1732137 | --- | --- | --- | 1,55 | up   |
| 6056520 | 7068259 | 1051634 | --- | --- | --- | 1,02 | up   |
| 6056565 | 7119930 | 1177219 | --- | --- | --- | 1,58 | up   |
| 6056574 | 7032444 | 966754  | --- | --- | --- | 1,01 | down |
| 6056644 | 7112225 | 1157574 | --- | --- | --- | 1,06 | down |
| 6056860 | 7367971 | 1789123 | --- | --- | --- | 1,04 | down |
| 6056884 | 7031774 | 964780  | --- | --- | --- | 1,17 | down |
| 6056947 | 7056333 | 1023689 | --- | --- | --- | 1,04 | up   |
| 6056971 | 7357890 | 1764384 | --- | --- | --- | 1,10 | down |
| 6056994 | 7240569 | 1475359 | --- | --- | --- | 1,02 | up   |
| 6056998 | 7374790 | 1808779 | --- | --- | --- | 1,17 | up   |
| 6057012 | 7088625 | 1099881 | --- | --- | --- | 1,00 | down |
| 6057023 | 7378997 | 1818620 | --- | --- | --- | 3,83 | up   |
| 6057037 | 7198644 | 1372269 | --- | --- | --- | 1,06 | down |
| 6057112 | 7111066 | 1154952 | --- | --- | --- | 1,05 | down |
| 6057218 | 7265989 | 1537103 | --- | --- | --- | 1,68 | down |
| 6057365 | 7280743 | 1574563 | --- | --- | --- | 1,12 | up   |
| 6057428 | 7111573 | 1156027 | --- | --- | --- | 1,06 | down |
| 6057435 | 7243130 | 1480931 | --- | --- | --- | 1,27 | down |
| 6057470 | 7371677 | 1800756 | --- | --- | --- | 1,02 | up   |
| 6057534 | 7202550 | 1381611 | --- | --- | --- | 1,60 | up   |
| 6057538 | 7233425 | 1456754 | --- | --- | --- | 1,10 | down |
| 6057577 | 7072765 | 1062743 | --- | --- | --- | 2,03 | up   |
| 6057673 | 7133749 | 1210800 | --- | --- | --- | 1,76 | down |
| 6057775 | 7340838 | 1722048 | --- | --- | --- | 1,06 | down |
| 6057804 | 7264274 | 1533172 | --- | --- | --- | 1,99 | up   |
| 6057872 | 7210263 | 1399744 | --- | --- | --- | 1,04 | down |
| 6057916 | 7260613 | 1524294 | --- | --- | --- | 1,86 | up   |
| 6058090 | 7281507 | 1576679 | --- | --- | --- | 1,67 | down |



|         |         |         |     |     |     |      |      |
|---------|---------|---------|-----|-----|-----|------|------|
| 6058169 | 7156052 | 1265765 | --- | --- | --- | 2,13 | up   |
| 6058189 | 7108551 | 1148700 | --- | --- | --- | 1,04 | up   |
| 6058226 | 7086522 | 1093936 | --- | --- | --- | 2,89 | down |
| 6058309 | 7120010 | 1177380 | --- | --- | --- | 1,06 | down |
| 6058374 | 7288063 | 1591902 | --- | --- | --- | 1,00 | up   |
| 6058394 | 7367971 | 1789110 | --- | --- | --- | 1,06 | up   |
| 6058425 | 7232029 | 1452776 | --- | --- | --- | 1,77 | up   |
| 6058447 | 7041584 | 989464  | --- | --- | --- | 1,02 | up   |
| 6058461 | 7037806 | 980235  | --- | --- | --- | 1,41 | down |
| 6058501 | 7115708 | 1166475 | --- | --- | --- | 1,02 | up   |
| 6058629 | 7350993 | 1747549 | --- | --- | --- | 1,67 | up   |
| 6058854 | 7061003 | 1033925 | --- | --- | --- | 1,08 | up   |
| 6058903 | 7337522 | 1713594 | --- | --- | --- | 1,26 | down |
| 6059052 | 7340506 | 1721353 | --- | --- | --- | 1,26 | down |
| 6059167 | 7340304 | 1720864 | --- | --- | --- | 1,84 | down |
| 6059322 | 7336931 | 1711872 | --- | --- | --- | 1,07 | down |
| 6059334 | 7050930 | 1011608 | --- | --- | --- | 1,01 | down |
| 6059346 | 7070869 | 1058498 | --- | --- | --- | 1,14 | up   |
| 6059481 | 7156061 | 1265822 | --- | --- | --- | 1,18 | up   |
| 6059485 | 7370484 | 1797165 | --- | --- | --- | 1,51 | up   |
| 6059530 | 7117158 | 1170017 | --- | --- | --- | 1,28 | down |
| 6059607 | 7039265 | 983658  | --- | --- | --- | 1,09 | up   |
| 6059613 | 7093806 | 1112163 | --- | --- | --- | 1,93 | down |
| 6059692 | 7297483 | 1615249 | --- | --- | --- | 1,04 | up   |
| 6059724 | 7356115 | 1760130 | --- | --- | --- | 1,03 | down |
| 6059726 | 7179143 | 1322790 | --- | --- | --- | 2,17 | down |
| 6059814 | 7061703 | 1035736 | --- | --- | --- | 1,57 | up   |
| 6059820 | 7065655 | 1045260 | --- | --- | --- | 1,02 | down |
| 6059853 | 7049118 | 1007760 | --- | --- | --- | 1,27 | up   |
| 6059996 | 7161841 | 1279880 | --- | --- | --- | 1,25 | up   |
| 6060045 | 7086966 | 1095255 | --- | --- | --- | 1,15 | down |
| 6060099 | 7101258 | 1130575 | --- | --- | --- | 1,34 | up   |
| 6060120 | 7041609 | 989578  | --- | --- | --- | 1,53 | up   |
| 6060206 | 7197820 | 1370103 | --- | --- | --- | 1,04 | down |
| 6060231 | 7231203 | 1450468 | --- | --- | --- | 1,04 | up   |
| 6060234 | 7186106 | 1340490 | --- | --- | --- | 1,15 | up   |
| 6060273 | 7075445 | 1069356 | --- | --- | --- | 1,53 | up   |
| 6060517 | 7226241 | 1437793 | --- | --- | --- | 1,10 | down |
| 6060528 | 7155286 | 1263841 | --- | --- | --- | 1,19 | up   |
| 6060624 | 7050167 | 1009820 | --- | --- | --- | 1,08 | down |
| 6060675 | 7067828 | 1050791 | --- | --- | --- | 1,06 | down |
| 6060685 | 7069830 | 1055610 | --- | --- | --- | 1,19 | up   |
| 6060823 | 7068259 | 1051648 | --- | --- | --- | 1,50 | down |
| 6060927 | 7052331 | 1014601 | --- | --- | --- | 1,19 | up   |
| 6061308 | 7267802 | 1541770 | --- | --- | --- | 1,04 | up   |
| 6061352 | 7071264 | 1059360 | --- | --- | --- | 1,32 | down |
| 6061451 | 7350237 | 1745491 | --- | --- | --- | 1,08 | down |
| 6061475 | 7339732 | 1719221 | --- | --- | --- | 1,29 | down |
| 6061570 | 7236358 | 1464258 | --- | --- | --- | 1,07 | down |
| 6061641 | 7116103 | 1167609 | --- | --- | --- | 1,07 | down |
| 6061735 | 7071264 | 1059341 | --- | --- | --- | 1,02 | up   |
| 6061780 | 7071264 | 1059356 | --- | --- | --- | 1,01 | down |
| 6061789 | 7274780 | 1559249 | --- | --- | --- | 1,38 | up   |
| 6061798 | 7235069 | 1460970 | --- | --- | --- | 1,18 | up   |
| 6061844 | 7240665 | 1475845 | --- | --- | --- | 1,17 | down |
| 6061891 | 7236254 | 1464067 | --- | --- | --- | 1,24 | down |

|         |         |         |     |     |     |      |      |
|---------|---------|---------|-----|-----|-----|------|------|
| 6061933 | 7341002 | 1722553 | --- | --- | --- | 1,98 | up   |
| 6061934 | 7088489 | 1099516 | --- | --- | --- | 1,16 | up   |
| 6062094 | 7175368 | 1313283 | --- | --- | --- | 1,02 | up   |
| 6062202 | 7156114 | 1266042 | --- | --- | --- | 2,09 | down |
| 6062206 | 7059020 | 1029333 | --- | --- | --- | 1,26 | down |
| 6062257 | 7059375 | 1030074 | --- | --- | --- | 1,11 | up   |
| 6062334 | 7369938 | 1795564 | --- | --- | --- | 2,73 | down |
| 6062389 | 7067828 | 1050780 | --- | --- | --- | 1,06 | up   |
| 6062519 | 7053874 | 1018319 | --- | --- | --- | 1,03 | up   |
| 6062610 | 7099294 | 1126105 | --- | --- | --- | 1,11 | up   |
| 6062627 | 7120827 | 1179353 | --- | --- | --- | 1,15 | up   |
| 6062715 | 7156114 | 1266052 | --- | --- | --- | 1,12 | down |
| 6062844 | 7138047 | 1221233 | --- | --- | --- | 2,15 | down |
| 6062899 | 7068259 | 1051593 | --- | --- | --- | 1,57 | up   |
| 6062913 | 7169573 | 1298391 | --- | --- | --- | 1,92 | down |
| 6063032 | 7323545 | 1679989 | --- | --- | --- | 1,55 | up   |
| 6063100 | 7279073 | 1570730 | --- | --- | --- | 1,37 | down |
| 6063173 | 7209927 | 1398921 | --- | --- | --- | 1,03 | down |
| 6063191 | 7210135 | 1399463 | --- | --- | --- | 2,14 | down |
| 6063208 | 7050726 | 1011254 | --- | --- | --- | 1,84 | up   |
| 6063483 | 7190844 | 1352138 | --- | --- | --- | 1,29 | down |
| 6063635 | 7049399 | 1008389 | --- | --- | --- | 1,22 | down |
| 6063636 | 7157341 | 1269149 | --- | --- | --- | 2,20 | down |
| 6063743 | 7129578 | 1200058 | --- | --- | --- | 1,11 | down |
| 6063919 | 7217650 | 1417197 | --- | --- | --- | 1,12 | down |
| 6063999 | 7112225 | 1157533 | --- | --- | --- | 1,16 | down |
| 6064198 | 7166497 | 1290355 | --- | --- | --- | 1,19 | up   |
| 6064226 | 7069253 | 1054175 | --- | --- | --- | 1,16 | down |
| 6064253 | 7267802 | 1541848 | --- | --- | --- | 1,55 | down |
| 6064360 | 7243647 | 1482443 | --- | --- | --- | 1,34 | down |
| 6064452 | 7364346 | 1779988 | --- | --- | --- | 1,40 | down |
| 6064494 | 7275927 | 1562338 | --- | --- | --- | 1,22 | up   |
| 6064522 | 7156170 | 1266282 | --- | --- | --- | 1,02 | down |
| 6064534 | 7024628 | 947422  | --- | --- | --- | 1,31 | up   |
| 6064555 | 7162144 | 1280494 | --- | --- | --- | 1,87 | down |
| 6064672 | 7193056 | 1358260 | --- | --- | --- | 1,08 | up   |
| 6064681 | 7049399 | 1008362 | --- | --- | --- | 1,49 | down |
| 6064689 | 7383501 | 1828207 | --- | --- | --- | 1,44 | up   |
| 6064705 | 7278957 | 1570393 | --- | --- | --- | 1,07 | down |
| 6064781 | 7287222 | 1589747 | --- | --- | --- | 2,02 | up   |
| 6064814 | 7084193 | 1089097 | --- | --- | --- | 2,49 | up   |
| 6064857 | 7131103 | 1204332 | --- | --- | --- | 1,07 | down |
| 6065049 | 7116614 | 1168794 | --- | --- | --- | 1,17 | up   |
| 6065092 | 7237438 | 1466791 | --- | --- | --- | 1,03 | up   |
| 6065144 | 7359551 | 1768641 | --- | --- | --- | 1,09 | up   |
| 6065308 | 7287222 | 1589716 | --- | --- | --- | 1,04 | up   |
| 6065366 | 7063515 | 1039636 | --- | --- | --- | 1,43 | up   |
| 6065397 | 7313411 | 1655442 | --- | --- | --- | 1,10 | up   |
| 6065527 | 7278957 | 1570393 | --- | --- | --- | 2,46 | down |
| 6065562 | 7172988 | 1307278 | --- | --- | --- | 1,39 | up   |
| 6065584 | 7358859 | 1766995 | --- | --- | --- | 1,17 | down |
| 6065740 | 7180861 | 1327219 | --- | --- | --- | 1,18 | up   |
| 6065798 | 7331297 | 1698810 | --- | --- | --- | 1,95 | up   |
| 6065837 | 7336727 | 1711284 | --- | --- | --- | 1,14 | up   |
| 6065859 | 7029078 | 958873  | --- | --- | --- | 1,89 | up   |
| 6065897 | 7028624 | 957991  | --- | --- | --- | 1,06 | down |

|         |         |         |     |     |     |      |      |
|---------|---------|---------|-----|-----|-----|------|------|
| 6065919 | 7033337 | 969489  | --- | --- | --- | 1,05 | up   |
| 6066030 | 7340304 | 1720868 | --- | --- | --- | 1,48 | down |
| 6066180 | 7289382 | 1595206 | --- | --- | --- | 1,78 | up   |
| 6066208 | 7243130 | 1480877 | --- | --- | --- | 1,38 | down |
| 6066259 | 7108551 | 1148690 | --- | --- | --- | 1,21 | up   |
| 6066428 | 7307721 | 1641994 | --- | --- | --- | 2,64 | up   |
| 6066478 | 7265259 | 1535442 | --- | --- | --- | 1,06 | up   |
| 6066485 | 7240569 | 1475372 | --- | --- | --- | 1,13 | down |
| 6066510 | 7068853 | 1053109 | --- | --- | --- | 1,01 | up   |
| 6066550 | 7062436 | 1037666 | --- | --- | --- | 1,29 | down |
| 6066691 | 7286807 | 1588828 | --- | --- | --- | 1,27 | down |
| 6066715 | 7212735 | 1405028 | --- | --- | --- | 2,13 | down |
| 6066821 | 7059766 | 1030972 | --- | --- | --- | 1,19 | down |
| 6066881 | 7188822 | 1346632 | --- | --- | --- | 1,11 | down |
| 6066884 | 7098451 | 1123825 | --- | --- | --- | 1,26 | down |
| 6066920 | 7174149 | 1310529 | --- | --- | --- | 1,10 | up   |
| 6067058 | 7315206 | 1660024 | --- | --- | --- | 1,15 | up   |
| 6067067 | 7196803 | 1367338 | --- | --- | --- | 1,17 | down |
| 6067183 | 7368954 | 1792772 | --- | --- | --- | 1,68 | down |
| 6067281 | 7249503 | 1496172 | --- | --- | --- | 1,11 | up   |
| 6067395 | 7243647 | 1482480 | --- | --- | --- | 1,02 | down |
| 6067407 | 7233921 | 1458161 | --- | --- | --- | 2,21 | down |
| 6067489 | 7363922 | 1778857 | --- | --- | --- | 1,21 | up   |
| 6067511 | 7364346 | 1780003 | --- | --- | --- | 1,44 | down |
| 6067588 | 7297589 | 1615640 | --- | --- | --- | 1,26 | up   |
| 6067612 | 7108345 | 1148071 | --- | --- | --- | 1,38 | up   |
| 6067642 | 7337224 | 1712607 | --- | --- | --- | 1,39 | up   |
| 6067673 | 7033672 | 970366  | --- | --- | --- | 1,05 | down |
| 6067693 | 7112225 | 1157595 | --- | --- | --- | 1,00 | up   |
| 6067802 | 7321029 | 1674822 | --- | --- | --- | 1,41 | down |
| 6067847 | 7297589 | 1615637 | --- | --- | --- | 1,36 | down |
| 6067906 | 7286807 | 1588821 | --- | --- | --- | 1,18 | up   |
| 6068017 | 7203872 | 1384750 | --- | --- | --- | 2,40 | down |
| 6068065 | 7121866 | 1181882 | --- | --- | --- | 1,11 | down |
| 6068072 | 7033672 | 970355  | --- | --- | --- | 1,75 | down |
| 6068183 | 7142081 | 1230974 | --- | --- | --- | 1,08 | down |
| 6068220 | 7244378 | 1484395 | --- | --- | --- | 1,04 | down |
| 6068412 | 7115146 | 1164938 | --- | --- | --- | 1,17 | down |
| 6068422 | 7038669 | 982187  | --- | --- | --- | 1,02 | up   |
| 6068426 | 7236395 | 1464329 | --- | --- | --- | 1,29 | down |
| 6068497 | 7384365 | 1830269 | --- | --- | --- | 1,05 | up   |
| 6068586 | 7040260 | 986078  | --- | --- | --- | 1,13 | up   |
| 6068750 | 7033337 | 969490  | --- | --- | --- | 1,53 | down |
| 6068898 | 7106414 | 1143193 | --- | --- | --- | 2,06 | up   |
| 6068976 | 7298692 | 1618405 | --- | --- | --- | 1,17 | down |
| 6068989 | 7233425 | 1456778 | --- | --- | --- | 1,04 | up   |
| 6069079 | 7032618 | 967304  | --- | --- | --- | 1,10 | down |
| 6069148 | 7068259 | 1051596 | --- | --- | --- | 1,15 | down |
| 6069188 | 7295410 | 1609750 | --- | --- | --- | 1,05 | down |
| 6069305 | 7217143 | 1415617 | --- | --- | --- | 1,25 | up   |
| 6069348 | 7287222 | 1589747 | --- | --- | --- | 1,17 | down |
| 6069355 | 7350489 | 1746131 | --- | --- | --- | 1,09 | down |
| 6069448 | 7031576 | 964109  | --- | --- | --- | 1,02 | up   |
| 6069674 | 7068073 | 1051166 | --- | --- | --- | 1,14 | up   |
| 6069705 | 7303616 | 1631341 | --- | --- | --- | 1,04 | down |
| 6069708 | 7192696 | 1357181 | --- | --- | --- | 1,11 | down |

|         |         |         |     |     |     |      |      |
|---------|---------|---------|-----|-----|-----|------|------|
| 6069730 | 7032083 | 965682  | --- | --- | --- | 1,57 | up   |
| 6069744 | 7376566 | 1812879 | --- | --- | --- | 1,01 | down |
| 6069819 | 7099650 | 1126882 | --- | --- | --- | 1,20 | up   |
| 6069892 | 7167507 | 1293142 | --- | --- | --- | 1,20 | up   |
| 6069966 | 7061367 | 1034850 | --- | --- | --- | 1,29 | up   |
| 6070004 | 7193644 | 1359711 | --- | --- | --- | 1,05 | down |
| 6070063 | 7086966 | 1095290 | --- | --- | --- | 1,54 | down |
| 6070092 | 7096859 | 1119327 | --- | --- | --- | 1,76 | up   |
| 6070139 | 7087965 | 1098055 | --- | --- | --- | 1,16 | down |
| 6070262 | 7088489 | 1099522 | --- | --- | --- | 1,36 | down |
| 6070310 | 7178060 | 1320177 | --- | --- | --- | 1,02 | down |
| 6070313 | 7380452 | 1821676 | --- | --- | --- | 1,61 | up   |
| 6070472 | 7072765 | 1062743 | --- | --- | --- | 1,42 | up   |
| 6070882 | 7380497 | 1821823 | --- | --- | --- | 1,34 | up   |
| 6071120 | 7347396 | 1738527 | --- | --- | --- | 1,03 | up   |
| 6071156 | 7096924 | 1119613 | --- | --- | --- | 1,06 | down |
| 6071333 | 7328695 | 1692314 | --- | --- | --- | 1,65 | down |
| 6071434 | 7078666 | 1076507 | --- | --- | --- | 1,04 | down |
| 6071581 | 7289382 | 1595202 | --- | --- | --- | 1,06 | up   |
| 6071621 | 7231650 | 1451835 | --- | --- | --- | 1,14 | down |
| 6071624 | 7189689 | 1349026 | --- | --- | --- | 1,28 | down |
| 6071671 | 7233359 | 1456506 | --- | --- | --- | 1,83 | up   |
| 6071921 | 7161992 | 1280150 | --- | --- | --- | 1,03 | up   |
| 6071943 | 7062436 | 1037722 | --- | --- | --- | 1,75 | down |
| 6072424 | 7217650 | 1417171 | --- | --- | --- | 1,48 | up   |
| 6072431 | 7284380 | 1583480 | --- | --- | --- | 1,06 | down |
| 6072490 | 7302018 | 1626958 | --- | --- | --- | 1,08 | up   |
| 6072510 | 7247954 | 1492388 | --- | --- | --- | 2,35 | up   |
| 6072525 | 7277783 | 1567475 | --- | --- | --- | 1,76 | down |
| 6072618 | 7149008 | 1248602 | --- | --- | --- | 1,15 | up   |
| 6072649 | 7363768 | 1778604 | --- | --- | --- | 1,10 | up   |
| 6072685 | 7365183 | 1781917 | --- | --- | --- | 1,25 | up   |
| 6072774 | 7329135 | 1693488 | --- | --- | --- | 1,14 | up   |
| 6072842 | 7357890 | 1764382 | --- | --- | --- | 1,55 | down |
| 6072861 | 7367971 | 1789110 | --- | --- | --- | 1,09 | up   |
| 6073019 | 7054636 | 1019873 | --- | --- | --- | 1,36 | down |
| 6073203 | 7222221 | 1428063 | --- | --- | --- | 1,07 | up   |
| 6073228 | 7064468 | 1042363 | --- | --- | --- | 1,41 | down |
| 6073258 | 7361420 | 1773056 | --- | --- | --- | 1,18 | up   |
| 6073290 | 7380497 | 1821851 | --- | --- | --- | 1,06 | up   |
| 6073331 | 7076236 | 1071186 | --- | --- | --- | 1,17 | down |
| 6073430 | 7072225 | 1061401 | --- | --- | --- | 1,52 | up   |
| 6073455 | 7243130 | 1480930 | --- | --- | --- | 1,21 | down |
| 6073626 | 7359426 | 1768357 | --- | --- | --- | 1,59 | up   |
| 6073676 | 7233440 | 1456837 | --- | --- | --- | 1,21 | down |
| 6073679 | 7242451 | 1479349 | --- | --- | --- | 2,08 | down |
| 6073810 | 7060851 | 1033365 | --- | --- | --- | 1,16 | down |
| 6073888 | 7344406 | 1731224 | --- | --- | --- | 1,03 | up   |
| 6074037 | 7339379 | 1718349 | --- | --- | --- | 1,47 | down |
| 6074057 | 7099573 | 1126731 | --- | --- | --- | 1,21 | down |
| 6074139 | 7098411 | 1123735 | --- | --- | --- | 1,54 | up   |
| 6074227 | 7297274 | 1614658 | --- | --- | --- | 1,04 | up   |
| 6074287 | 7146982 | 1243285 | --- | --- | --- | 1,29 | up   |
| 6074345 | 7351951 | 1749813 | --- | --- | --- | 1,00 | up   |
| 6074534 | 7331719 | 1699912 | --- | --- | --- | 1,22 | up   |
| 6074601 | 7062436 | 1037666 | --- | --- | --- | 1,61 | down |

|         |         |         |     |     |     |      |      |
|---------|---------|---------|-----|-----|-----|------|------|
| 6074687 | 7146982 | 1243288 | --- | --- | --- | 2,55 | down |
| 6074690 | 7232340 | 1453525 | --- | --- | --- | 1,07 | up   |
| 6074710 | 7241136 | 1476724 | --- | --- | --- | 1,00 | up   |
| 6074799 | 7280743 | 1574530 | --- | --- | --- | 1,10 | up   |
| 6074800 | 7142853 | 1232906 | --- | --- | --- | 1,02 | up   |
| 6074858 | 7088625 | 1099865 | --- | --- | --- | 1,01 | up   |
| 6074870 | 7027795 | 956272  | --- | --- | --- | 2,17 | up   |
| 6075149 | 7034293 | 971956  | --- | --- | --- | 1,25 | down |
| 6075211 | 7186464 | 1341386 | --- | --- | --- | 1,27 | up   |
| 6075412 | 7245874 | 1487596 | --- | --- | --- | 1,15 | up   |
| 6075431 | 7319937 | 1672275 | --- | --- | --- | 1,02 | up   |
| 6075468 | 7101400 | 1130899 | --- | --- | --- | 2,43 | up   |
| 6075572 | 7260613 | 1524268 | --- | --- | --- | 1,01 | up   |
| 6075769 | 7120169 | 1177816 | --- | --- | --- | 1,44 | down |
| 6076138 | 7043535 | 994099  | --- | --- | --- | 1,19 | down |
| 6076359 | 7380497 | 1821843 | --- | --- | --- | 1,19 | up   |
| 6076381 | 7374362 | 1807642 | --- | --- | --- | 1,06 | up   |
| 6076385 | 7213908 | 1407650 | --- | --- | --- | 1,14 | up   |
| 6076388 | 7070616 | 1057786 | --- | --- | --- | 1,26 | up   |
| 6076410 | 7196233 | 1366098 | --- | --- | --- | 1,41 | up   |
| 6076433 | 7357890 | 1764381 | --- | --- | --- | 1,15 | up   |
| 6076492 | 7373417 | 1805091 | --- | --- | --- | 1,17 | up   |
| 6076601 | 7264797 | 1534430 | --- | --- | --- | 1,16 | down |
| 6076695 | 7037806 | 980239  | --- | --- | --- | 1,23 | down |
| 6076712 | 7206133 | 1389966 | --- | --- | --- | 1,03 | down |
| 6076734 | 7364346 | 1780017 | --- | --- | --- | 1,14 | down |
| 6076773 | 7280743 | 1574492 | --- | --- | --- | 1,00 | down |
| 6076774 | 7172066 | 1304738 | --- | --- | --- | 1,55 | down |
| 6076885 | 7049332 | 1008174 | --- | --- | --- | 3,58 | down |
| 6076959 | 7282343 | 1578666 | --- | --- | --- | 1,62 | down |
| 6076998 | 7172373 | 1305578 | --- | --- | --- | 1,06 | up   |
| 6077016 | 7108345 | 1148071 | --- | --- | --- | 1,02 | up   |
| 6077096 | 7327169 | 1688439 | --- | --- | --- | 1,21 | up   |
| 6077295 | 7060195 | 1031973 | --- | --- | --- | 1,37 | up   |
| 6077341 | 7190524 | 1351177 | --- | --- | --- | 1,43 | down |
| 6077403 | 7087282 | 1096214 | --- | --- | --- | 1,06 | down |
| 6077611 | 7065265 | 1044570 | --- | --- | --- | 1,55 | down |
| 6077841 | 7237719 | 1467521 | --- | --- | --- | 1,18 | up   |
| 6077851 | 7174281 | 1310847 | --- | --- | --- | 1,31 | up   |
| 6078016 | 7247848 | 1492071 | --- | --- | --- | 1,03 | up   |
| 6078117 | 7374790 | 1808785 | --- | --- | --- | 1,15 | up   |
| 6078151 | 7162144 | 1280500 | --- | --- | --- | 1,22 | up   |
| 6078211 | 7279073 | 1570678 | --- | --- | --- | 2,29 | down |
| 6078290 | 7340990 | 1722505 | --- | --- | --- | 1,20 | up   |
| 6078400 | 7157341 | 1269197 | --- | --- | --- | 1,56 | down |
| 6078564 | 7329846 | 1694990 | --- | --- | --- | 1,71 | up   |
| 6078638 | 7041584 | 989462  | --- | --- | --- | 2,90 | up   |
| 6078668 | 7162177 | 1280582 | --- | --- | --- | 1,09 | up   |
| 6078693 | 7192320 | 1356026 | --- | --- | --- | 1,21 | up   |
| 6078710 | 7054958 | 1020577 | --- | --- | --- | 1,07 | up   |
| 6078729 | 7088625 | 1099866 | --- | --- | --- | 1,24 | up   |
| 6078753 | 7337224 | 1712589 | --- | --- | --- | 1,74 | up   |
| 6078792 | 7150631 | 1252186 | --- | --- | --- | 1,12 | down |
| 6078859 | 7236395 | 1464342 | --- | --- | --- | 1,23 | down |
| 6078976 | 7148978 | 1248526 | --- | --- | --- | 1,19 | up   |
| 6079007 | 7119930 | 1177200 | --- | --- | --- | 1,01 | up   |

|         |         |         |     |     |     |      |      |
|---------|---------|---------|-----|-----|-----|------|------|
| 6079082 | 7343868 | 1729856 | --- | --- | --- | 1,02 | down |
| 6079106 | 7155116 | 1263389 | --- | --- | --- | 1,69 | up   |
| 6079241 | 7240569 | 1475493 | --- | --- | --- | 1,06 | down |
| 6079268 | 7249503 | 1496240 | --- | --- | --- | 1,14 | down |
| 6079318 | 7217650 | 1417196 | --- | --- | --- | 1,28 | up   |
| 6079369 | 7260613 | 1524275 | --- | --- | --- | 1,03 | up   |
| 6079427 | 7122486 | 1183424 | --- | --- | --- | 1,19 | down |
| 6079461 | 7032444 | 966757  | --- | --- | --- | 1,16 | down |
| 6079471 | 7243603 | 1482268 | --- | --- | --- | 1,01 | down |
| 6079503 | 7133612 | 1210215 | --- | --- | --- | 1,10 | up   |
| 6079534 | 7132125 | 1206631 | --- | --- | --- | 2,28 | down |
| 6079577 | 7115880 | 1166829 | --- | --- | --- | 1,80 | down |
| 6079670 | 7101564 | 1131390 | --- | --- | --- | 2,31 | up   |
| 6079743 | 7171034 | 1302293 | --- | --- | --- | 1,20 | up   |
| 6079745 | 7069830 | 1055630 | --- | --- | --- | 1,18 | up   |
| 6079808 | 7349882 | 1744783 | --- | --- | --- | 1,28 | up   |
| 6079846 | 7103811 | 1137067 | --- | --- | --- | 1,02 | up   |
| 6079919 | 7050930 | 1011628 | --- | --- | --- | 1,42 | down |
| 6079964 | 7343122 | 1727735 | --- | --- | --- | 1,05 | down |
| 6079975 | 7211363 | 1402048 | --- | --- | --- | 1,10 | down |
| 6080017 | 7168858 | 1296843 | --- | --- | --- | 1,25 | up   |
| 6080018 | 7171047 | 1302369 | --- | --- | --- | 1,19 | down |
| 6080025 | 7108345 | 1148080 | --- | --- | --- | 1,03 | down |
| 6080044 | 7197056 | 1367847 | --- | --- | --- | 1,32 | down |
| 6080132 | 7331297 | 1698810 | --- | --- | --- | 1,15 | up   |
| 6080142 | 7172373 | 1305573 | --- | --- | --- | 1,01 | down |
| 6080155 | 7186464 | 1341381 | --- | --- | --- | 1,04 | down |
| 6080199 | 7373906 | 1806358 | --- | --- | --- | 1,10 | down |
| 6080210 | 7096924 | 1119620 | --- | --- | --- | 1,14 | down |
| 6080236 | 7095956 | 1117047 | --- | --- | --- | 1,04 | down |
| 6080375 | 7231203 | 1450402 | --- | --- | --- | 1,34 | up   |
| 6080561 | 7062436 | 1037711 | --- | --- | --- | 1,22 | up   |
| 6080611 | 7062173 | 1037004 | --- | --- | --- | 1,10 | down |
| 6080678 | 7380497 | 1821856 | --- | --- | --- | 1,05 | up   |
| 6080773 | 7029052 | 958799  | --- | --- | --- | 1,11 | down |
| 6080792 | 7061367 | 1034852 | --- | --- | --- | 1,11 | down |
| 6080805 | 7342959 | 1727345 | --- | --- | --- | 1,59 | up   |
| 6080819 | 7325674 | 1685215 | --- | --- | --- | 1,56 | down |
| 6080820 | 7243130 | 1480834 | --- | --- | --- | 1,12 | up   |
| 6080901 | 7376566 | 1812872 | --- | --- | --- | 1,36 | up   |
| 6080902 | 7065266 | 1044584 | --- | --- | --- | 1,06 | up   |
| 6080912 | 7139026 | 1223514 | --- | --- | --- | 1,41 | up   |
| 6080919 | 7340757 | 1721890 | --- | --- | --- | 1,40 | down |
| 6080929 | 7107066 | 1144785 | --- | --- | --- | 1,29 | down |
| 6081065 | 7166439 | 1290097 | --- | --- | --- | 1,28 | down |
| 6081135 | 7112225 | 1157585 | --- | --- | --- | 1,05 | down |
| 6081204 | 7267802 | 1541740 | --- | --- | --- | 1,09 | down |
| 6081215 | 7236254 | 1464073 | --- | --- | --- | 1,13 | down |
| 6081259 | 7078666 | 1076532 | --- | --- | --- | 1,16 | up   |
| 6081264 | 7279568 | 1572022 | --- | --- | --- | 1,43 | down |
| 6081345 | 7293646 | 1605412 | --- | --- | --- | 1,39 | up   |
| 6081577 | 7188822 | 1346624 | --- | --- | --- | 2,22 | up   |
| 6081596 | 7337224 | 1712606 | --- | --- | --- | 1,80 | down |
| 6081610 | 7325674 | 1685229 | --- | --- | --- | 1,27 | up   |
| 6081688 | 7102369 | 1133424 | --- | --- | --- | 1,01 | down |
| 6081701 | 7087965 | 1098059 | --- | --- | --- | 1,02 | down |

|         |         |         |     |     |     |      |      |
|---------|---------|---------|-----|-----|-----|------|------|
| 6081789 | 7112225 | 1157566 | --- | --- | --- | 1,19 | down |
| 6081815 | 7240569 | 1475504 | --- | --- | --- | 1,09 | down |
| 6081975 | 7190524 | 1351186 | --- | --- | --- | 1,12 | up   |
| 6082033 | 7380452 | 1821702 | --- | --- | --- | 1,07 | down |
| 6082083 | 7049399 | 1008320 | --- | --- | --- | 1,04 | up   |
| 6082106 | 7273251 | 1555957 | --- | --- | --- | 1,12 | down |
| 6082220 | 7202550 | 1381604 | --- | --- | --- | 1,22 | down |
| 6082366 | 7225553 | 1435984 | --- | --- | --- | 1,01 | up   |
| 6082481 | 7139026 | 1223503 | --- | --- | --- | 1,07 | down |
| 6082576 | 7194017 | 1360792 | --- | --- | --- | 1,25 | down |
| 6082803 | 7176456 | 1315835 | --- | --- | --- | 1,05 | up   |
| 6082868 | 7111573 | 1156020 | --- | --- | --- | 1,02 | down |
| 6082959 | 7098411 | 1123692 | --- | --- | --- | 1,10 | down |
| 6082970 | 7368684 | 1791860 | --- | --- | --- | 1,66 | down |
| 6083066 | 7249503 | 1496163 | --- | --- | --- | 1,15 | up   |
| 6083126 | 7034293 | 971933  | --- | --- | --- | 1,15 | down |
| 6083375 | 7148978 | 1248554 | --- | --- | --- | 1,37 | down |
| 6083470 | 7312621 | 1653457 | --- | --- | --- | 1,29 | up   |
| 6083628 | 7355804 | 1759430 | --- | --- | --- | 1,17 | up   |
| 6083672 | 7072765 | 1062743 | --- | --- | --- | 1,69 | down |
| 6083694 | 7331297 | 1698802 | --- | --- | --- | 1,17 | up   |
| 6083831 | 7333333 | 1703403 | --- | --- | --- | 1,21 | down |
| 6083924 | 7247228 | 1490514 | --- | --- | --- | 1,54 | down |
| 6083980 | 7092965 | 1110202 | --- | --- | --- | 1,18 | up   |
| 6084156 | 7264274 | 1533168 | --- | --- | --- | 2,10 | up   |
| 6084165 | 7042382 | 991287  | --- | --- | --- | 1,19 | down |
| 6084211 | 7060851 | 1033423 | --- | --- | --- | 1,65 | up   |
| 6084384 | 7274780 | 1559232 | --- | --- | --- | 1,31 | down |
| 6084387 | 7298692 | 1618413 | --- | --- | --- | 1,49 | down |
| 6084395 | 7203872 | 1384772 | --- | --- | --- | 1,06 | up   |
| 6084510 | 7249503 | 1496215 | --- | --- | --- | 1,20 | down |
| 6084524 | 7283819 | 1582121 | --- | --- | --- | 1,45 | down |
| 6084731 | 7212718 | 1404942 | --- | --- | --- | 1,11 | up   |
| 6084780 | 7116614 | 1168786 | --- | --- | --- | 1,27 | down |
| 6084804 | 7383655 | 1828573 | --- | --- | --- | 1,26 | up   |
| 6084821 | 7065655 | 1045237 | --- | --- | --- | 1,06 | down |
| 6084924 | 7358048 | 1764804 | --- | --- | --- | 1,38 | down |
| 6084982 | 7142853 | 1232908 | --- | --- | --- | 1,16 | up   |
| 6084998 | 7349946 | 1744951 | --- | --- | --- | 1,17 | up   |
| 6085080 | 7339110 | 1717619 | --- | --- | --- | 1,51 | down |
| 6085094 | 7148978 | 1248466 | --- | --- | --- | 1,05 | up   |
| 6085102 | 7256191 | 1512862 | --- | --- | --- | 1,47 | down |
| 6085128 | 7210263 | 1399764 | --- | --- | --- | 1,25 | up   |
| 6085169 | 7162959 | 1282084 | --- | --- | --- | 1,12 | down |
| 6085328 | 7281077 | 1575562 | --- | --- | --- | 1,40 | up   |
| 6085352 | 7243098 | 1480750 | --- | --- | --- | 1,28 | up   |
| 6085458 | 7217747 | 1417489 | --- | --- | --- | 1,22 | down |
| 6085467 | 7172373 | 1305583 | --- | --- | --- | 1,02 | up   |
| 6085539 | 7258545 | 1518929 | --- | --- | --- | 1,00 | down |
| 6085565 | 7092549 | 1109120 | --- | --- | --- | 1,01 | down |
| 6085585 | 7065265 | 1044569 | --- | --- | --- | 1,63 | down |
| 6085621 | 7341546 | 1723975 | --- | --- | --- | 1,02 | up   |
| 6085872 | 7073950 | 1065906 | --- | --- | --- | 1,38 | up   |
| 6085890 | 7073854 | 1065635 | --- | --- | --- | 2,07 | up   |
| 6086033 | 7247229 | 1490564 | --- | --- | --- | 1,16 | up   |
| 6086083 | 7116614 | 1168791 | --- | --- | --- | 1,26 | up   |

|         |         |         |     |     |     |      |      |
|---------|---------|---------|-----|-----|-----|------|------|
| 6086105 | 7303616 | 1631323 | --- | --- | --- | 1,07 | up   |
| 6086146 | 7240569 | 1475498 | --- | --- | --- | 1,07 | down |
| 6086149 | 7253408 | 1505951 | --- | --- | --- | 1,81 | down |
| 6086210 | 7321465 | 1675744 | --- | --- | --- | 1,23 | up   |
| 6086276 | 7332970 | 1702540 | --- | --- | --- | 2,04 | down |
| 6086328 | 7037764 | 980091  | --- | --- | --- | 1,43 | up   |
| 6086350 | 7243130 | 1480873 | --- | --- | --- | 1,54 | up   |
| 6086447 | 7099573 | 1126718 | --- | --- | --- | 1,05 | down |
| 6086477 | 7247334 | 1490820 | --- | --- | --- | 1,23 | down |
| 6086553 | 7321414 | 1675632 | --- | --- | --- | 1,02 | up   |
| 6086649 | 7191983 | 1355172 | --- | --- | --- | 1,39 | up   |
| 6086670 | 7198210 | 1370987 | --- | --- | --- | 1,02 | up   |
| 6086680 | 7108122 | 1147385 | --- | --- | --- | 1,32 | down |
| 6086765 | 7170764 | 1301490 | --- | --- | --- | 1,75 | down |
| 6086854 | 7115708 | 1166476 | --- | --- | --- | 2,14 | down |
| 6086867 | 7027759 | 956125  | --- | --- | --- | 1,82 | up   |
| 6086955 | 7149817 | 1250307 | --- | --- | --- | 1,23 | up   |
| 6087050 | 7236597 | 1464773 | --- | --- | --- | 1,05 | up   |
| 6087075 | 7070836 | 1058351 | --- | --- | --- | 1,05 | up   |
| 6087130 | 7330238 | 1695923 | --- | --- | --- | 1,57 | up   |
| 6087165 | 7235069 | 1460993 | --- | --- | --- | 1,12 | down |
| 6087508 | 7054958 | 1020569 | --- | --- | --- | 1,12 | down |
| 6087554 | 7292517 | 1602551 | --- | --- | --- | 1,19 | up   |
| 6087570 | 7027797 | 956311  | --- | --- | --- | 1,08 | up   |
| 6087670 | 7179785 | 1324461 | --- | --- | --- | 1,22 | down |
| 6087734 | 7101258 | 1130578 | --- | --- | --- | 1,49 | up   |
| 6087750 | 7352635 | 1751446 | --- | --- | --- | 1,24 | up   |
| 6087797 | 7211389 | 1402114 | --- | --- | --- | 1,26 | down |
| 6087819 | 7243363 | 1481625 | --- | --- | --- | 1,22 | up   |
| 6087834 | 7376206 | 1811974 | --- | --- | --- | 1,34 | down |
| 6087846 | 7236254 | 1464059 | --- | --- | --- | 1,03 | up   |
| 6087904 | 7209927 | 1398930 | --- | --- | --- | 1,05 | down |
| 6087940 | 7342959 | 1727344 | --- | --- | --- | 1,06 | up   |
| 6088003 | 7280743 | 1574552 | --- | --- | --- | 1,99 | up   |
| 6088190 | 7253408 | 1505944 | --- | --- | --- | 1,13 | up   |
| 6088205 | 7092549 | 1109174 | --- | --- | --- | 1,15 | down |
| 6088261 | 7238115 | 1468645 | --- | --- | --- | 1,21 | down |
| 6088291 | 7043535 | 994163  | --- | --- | --- | 1,30 | up   |
| 6088343 | 7279586 | 1572076 | --- | --- | --- | 2,27 | up   |
| 6088379 | 7188822 | 1346630 | --- | --- | --- | 1,44 | down |
| 6088424 | 7107926 | 1146833 | --- | --- | --- | 1,52 | down |
| 6088569 | 7043379 | 993647  | --- | --- | --- | 1,06 | down |
| 6088653 | 7287337 | 1589978 | --- | --- | --- | 2,10 | down |
| 6088696 | 7065266 | 1044587 | --- | --- | --- | 1,54 | up   |
| 6088848 | 7060851 | 1033394 | --- | --- | --- | 1,27 | down |
| 6088924 | 7112225 | 1157583 | --- | --- | --- | 1,64 | down |
| 6089007 | 7141061 | 1228709 | --- | --- | --- | 2,06 | down |
| 6089161 | 7037764 | 979974  | --- | --- | --- | 1,33 | down |
| 6089197 | 7196029 | 1365627 | --- | --- | --- | 1,07 | up   |
| 6089326 | 7243130 | 1480888 | --- | --- | --- | 1,18 | up   |
| 6089337 | 7238252 | 1469292 | --- | --- | --- | 1,15 | down |
| 6089368 | 7308679 | 1644251 | --- | --- | --- | 1,91 | down |
| 6089525 | 7371677 | 1800754 | --- | --- | --- | 1,18 | up   |
| 6089526 | 7369706 | 1794787 | --- | --- | --- | 1,10 | up   |
| 6089682 | 7277719 | 1567088 | --- | --- | --- | 1,02 | down |
| 6089690 | 7332970 | 1702533 | --- | --- | --- | 1,04 | up   |



|         |         |         |     |     |     |      |      |
|---------|---------|---------|-----|-----|-----|------|------|
| 6089724 | 7172066 | 1304736 | --- | --- | --- | 1,76 | down |
| 6089820 | 7350489 | 1746124 | --- | --- | --- | 1,04 | up   |
| 6089828 | 7068853 | 1053131 | --- | --- | --- | 1,02 | down |
| 6089988 | 7030518 | 961685  | --- | --- | --- | 1,22 | up   |
| 6090026 | 7052385 | 1014771 | --- | --- | --- | 1,34 | down |
| 6090047 | 7311218 | 1650341 | --- | --- | --- | 1,00 | down |
| 6090135 | 7067614 | 1050198 | --- | --- | --- | 1,03 | down |
| 6090169 | 7274892 | 1559561 | --- | --- | --- | 1,03 | down |
| 6090189 | 7279533 | 1571906 | --- | --- | --- | 1,05 | up   |
| 6090207 | 7343868 | 1729853 | --- | --- | --- | 1,05 | down |
| 6090222 | 7267953 | 1542256 | --- | --- | --- | 1,44 | up   |
| 6090257 | 7350993 | 1747504 | --- | --- | --- | 1,13 | up   |
| 6090258 | 7355220 | 1758095 | --- | --- | --- | 2,07 | down |
| 6090277 | 7062173 | 1037022 | --- | --- | --- | 1,30 | up   |
| 6090481 | 7115708 | 1166471 | --- | --- | --- | 1,05 | down |
| 6090523 | 7256191 | 1512880 | --- | --- | --- | 1,21 | up   |
| 6090612 | 7132024 | 1206337 | --- | --- | --- | 1,31 | up   |
| 6090636 | 7258670 | 1519350 | --- | --- | --- | 1,21 | down |
| 6090730 | 7102369 | 1133417 | --- | --- | --- | 1,19 | down |
| 6090843 | 7053874 | 1018312 | --- | --- | --- | 1,33 | up   |
| 6090952 | 7337224 | 1712591 | --- | --- | --- | 1,38 | down |
| 6090959 | 7329135 | 1693488 | --- | --- | --- | 1,21 | down |
| 6091163 | 7358623 | 1766253 | --- | --- | --- | 1,06 | down |
| 6091178 | 7228520 | 1443766 | --- | --- | --- | 1,02 | up   |
| 6091203 | 7233012 | 1455409 | --- | --- | --- | 1,23 | up   |
| 6091367 | 7260613 | 1524267 | --- | --- | --- | 1,03 | down |
| 6091440 | 7279303 | 1571205 | --- | --- | --- | 1,36 | down |
| 6091519 | 7360486 | 1770962 | --- | --- | --- | 1,23 | down |
| 6091560 | 7236726 | 1465066 | --- | --- | --- | 1,01 | down |
| 6091577 | 7245695 | 1487082 | --- | --- | --- | 1,07 | down |
| 6091658 | 7109424 | 1151113 | --- | --- | --- | 1,31 | down |
| 6091682 | 7240569 | 1475522 | --- | --- | --- | 1,04 | up   |
| 6091736 | 7170764 | 1301441 | --- | --- | --- | 1,09 | down |
| 6091779 | 7323545 | 1679984 | --- | --- | --- | 1,18 | up   |
| 6091880 | 7365093 | 1781623 | --- | --- | --- | 1,05 | down |
| 6091894 | 7172373 | 1305581 | --- | --- | --- | 1,31 | down |
| 6091907 | 7059766 | 1030973 | --- | --- | --- | 1,58 | down |
| 6091942 | 7127257 | 1194803 | --- | --- | --- | 1,63 | up   |
| 6091954 | 7050780 | 1011387 | --- | --- | --- | 1,32 | up   |
| 6092133 | 7339110 | 1717603 | --- | --- | --- | 1,38 | up   |
| 6092150 | 7112570 | 1158684 | --- | --- | --- | 1,23 | down |
| 6092159 | 7181193 | 1328293 | --- | --- | --- | 1,27 | down |
| 6092173 | 7274780 | 1559197 | --- | --- | --- | 1,28 | up   |
| 6092345 | 7112562 | 1158609 | --- | --- | --- | 1,08 | up   |
| 6092352 | 7247954 | 1492394 | --- | --- | --- | 1,23 | up   |
| 6092410 | 7344630 | 1731939 | --- | --- | --- | 1,04 | up   |
| 6092437 | 7156052 | 1265744 | --- | --- | --- | 1,29 | up   |
| 6092568 | 7059020 | 1029330 | --- | --- | --- | 1,39 | down |
| 6092677 | 7279881 | 1572715 | --- | --- | --- | 1,23 | up   |
| 6092752 | 7059766 | 1030972 | --- | --- | --- | 1,42 | down |
| 6092891 | 7108551 | 1148693 | --- | --- | --- | 1,22 | up   |
| 6092913 | 7274780 | 1559242 | --- | --- | --- | 1,72 | down |
| 6093057 | 7350993 | 1747514 | --- | --- | --- | 1,24 | down |
| 6093171 | 7210263 | 1399752 | --- | --- | --- | 1,63 | up   |
| 6093252 | 7196029 | 1365627 | --- | --- | --- | 1,78 | up   |
| 6093306 | 7099517 | 1126503 | --- | --- | --- | 1,07 | up   |

|         |         |         |     |     |     |      |      |
|---------|---------|---------|-----|-----|-----|------|------|
| 6093420 | 7240569 | 1475464 | --- | --- | --- | 1,33 | down |
| 6093449 | 7263152 | 1530370 | --- | --- | --- | 1,14 | up   |
| 6093556 | 7169599 | 1298449 | --- | --- | --- | 1,17 | up   |
| 6093683 | 7240224 | 1474388 | --- | --- | --- | 1,11 | down |
| 6093693 | 7373906 | 1806351 | --- | --- | --- | 1,21 | up   |
| 6093722 | 7041584 | 989457  | --- | --- | --- | 1,27 | up   |
| 6093850 | 7133612 | 1210248 | --- | --- | --- | 1,20 | up   |
| 6093933 | 7029770 | 960146  | --- | --- | --- | 1,47 | up   |
| 6093934 | 7196029 | 1365631 | --- | --- | --- | 1,13 | down |
| 6094017 | 7086966 | 1095254 | --- | --- | --- | 1,08 | up   |
| 6094058 | 7062173 | 1037006 | --- | --- | --- | 1,12 | down |
| 6094070 | 7340990 | 1722515 | --- | --- | --- | 1,03 | up   |
| 6094094 | 7341397 | 1723633 | --- | --- | --- | 1,19 | down |
| 6094242 | 7258520 | 1518895 | --- | --- | --- | 1,31 | down |
| 6094431 | 7279793 | 1572538 | --- | --- | --- | 1,11 | up   |
| 6094511 | 7031618 | 964199  | --- | --- | --- | 1,23 | up   |
| 6094531 | 7344190 | 1730605 | --- | --- | --- | 1,22 | up   |
| 6094709 | 7058713 | 1028658 | --- | --- | --- | 1,00 | down |
| 6094792 | 7073928 | 1065789 | --- | --- | --- | 1,49 | up   |
| 6094803 | 7049689 | 1008892 | --- | --- | --- | 1,34 | down |
| 6094819 | 7060851 | 1033435 | --- | --- | --- | 1,46 | down |
| 6094922 | 7098451 | 1123808 | --- | --- | --- | 1,24 | down |
| 6094928 | 7292657 | 1602844 | --- | --- | --- | 1,45 | up   |
| 6095012 | 7316054 | 1662298 | --- | --- | --- | 2,94 | up   |
| 6095117 | 7256191 | 1512862 | --- | --- | --- | 1,45 | up   |
| 6095390 | 7373038 | 1804277 | --- | --- | --- | 2,18 | up   |
| 6095401 | 7031618 | 964200  | --- | --- | --- | 1,23 | down |
| 6095428 | 7127540 | 1195286 | --- | --- | --- | 1,19 | down |
| 6095450 | 7240569 | 1475325 | --- | --- | --- | 1,45 | up   |
| 6095621 | 7243130 | 1480893 | --- | --- | --- | 1,34 | up   |
| 6095634 | 7028624 | 958003  | --- | --- | --- | 1,18 | down |
| 6095642 | 7211363 | 1402057 | --- | --- | --- | 1,30 | up   |
| 6095695 | 7099573 | 1126715 | --- | --- | --- | 1,22 | up   |
| 6095739 | 7145669 | 1239990 | --- | --- | --- | 1,18 | up   |
| 6095839 | 7213908 | 1407660 | --- | --- | --- | 1,36 | down |
| 6095895 | 7087282 | 1096162 | --- | --- | --- | 1,22 | down |
| 6095924 | 7112225 | 1157611 | --- | --- | --- | 1,91 | down |
| 6095967 | 7253088 | 1505113 | --- | --- | --- | 1,28 | up   |
| 6096009 | 7159036 | 1272962 | --- | --- | --- | 1,04 | down |
| 6096026 | 7122486 | 1183412 | --- | --- | --- | 1,11 | up   |
| 6096189 | 7060851 | 1033423 | --- | --- | --- | 1,28 | up   |
| 6096281 | 7080731 | 1080968 | --- | --- | --- | 1,65 | up   |
| 6096332 | 7052385 | 1014791 | --- | --- | --- | 1,22 | down |
| 6096410 | 7059375 | 1030064 | --- | --- | --- | 1,22 | down |
| 6096441 | 7240232 | 1474409 | --- | --- | --- | 1,38 | down |
| 6096546 | 7176456 | 1315848 | --- | --- | --- | 1,05 | down |
| 6096557 | 7331434 | 1699231 | --- | --- | --- | 1,01 | down |
| 6096709 | 7061367 | 1034856 | --- | --- | --- | 2,09 | down |
| 6096741 | 7039223 | 983564  | --- | --- | --- | 1,43 | up   |
| 6096769 | 7065655 | 1045255 | --- | --- | --- | 1,09 | down |
| 6096785 | 7149817 | 1250309 | --- | --- | --- | 1,32 | down |
| 6096816 | 7070836 | 1058344 | --- | --- | --- | 1,17 | up   |
| 6096969 | 7340990 | 1722518 | --- | --- | --- | 1,16 | down |
| 6097093 | 7211363 | 1402057 | --- | --- | --- | 1,32 | down |
| 6097196 | 7038530 | 981882  | --- | --- | --- | 1,37 | up   |
| 6097210 | 7042382 | 991291  | --- | --- | --- | 1,60 | up   |

|         |         |         |     |     |     |      |      |
|---------|---------|---------|-----|-----|-----|------|------|
| 6097225 | 7056333 | 1023704 | --- | --- | --- | 1,63 | down |
| 6097245 | 7148978 | 1248542 | --- | --- | --- | 1,04 | down |
| 6097280 | 7336931 | 1711874 | --- | --- | --- | 1,13 | up   |
| 6097284 | 7228530 | 1443825 | --- | --- | --- | 1,18 | up   |
| 6097389 | 7049399 | 1008390 | --- | --- | --- | 1,27 | up   |
| 6097458 | 7312621 | 1653461 | --- | --- | --- | 1,33 | up   |
| 6097523 | 7053874 | 1018320 | --- | --- | --- | 1,89 | down |
| 6097667 | 7321029 | 1674821 | --- | --- | --- | 1,74 | down |
| 6097672 | 7249737 | 1496759 | --- | --- | --- | 1,62 | down |
| 6097716 | 7154655 | 1262332 | --- | --- | --- | 1,41 | up   |
| 6097994 | 7062529 | 1037855 | --- | --- | --- | 1,17 | down |
| 6098060 | 7243130 | 1480863 | --- | --- | --- | 1,02 | up   |
| 6098117 | 7132024 | 1206337 | --- | --- | --- | 1,04 | up   |
| 6098221 | 7095021 | 1115131 | --- | --- | --- | 1,35 | up   |
| 6098282 | 7040260 | 986090  | --- | --- | --- | 1,03 | up   |
| 6098334 | 7052813 | 1015929 | --- | --- | --- | 1,13 | up   |
| 6098343 | 7297274 | 1614591 | --- | --- | --- | 1,04 | down |
| 6098537 | 7038610 | 982091  | --- | --- | --- | 1,10 | up   |
| 6098738 | 7243130 | 1480866 | --- | --- | --- | 1,13 | up   |
| 6098749 | 7064224 | 1041795 | --- | --- | --- | 1,51 | down |
| 6098777 | 7338807 | 1716798 | --- | --- | --- | 1,02 | up   |
| 6098975 | 7239752 | 1473153 | --- | --- | --- | 1,39 | up   |
| 6099119 | 7067670 | 1050343 | --- | --- | --- | 1,47 | down |
| 6099203 | 7037764 | 980078  | --- | --- | --- | 1,95 | down |
| 6099255 | 7033337 | 969516  | --- | --- | --- | 1,86 | down |
| 6099318 | 7077170 | 1073575 | --- | --- | --- | 1,05 | down |
| 6099355 | 7196029 | 1365613 | --- | --- | --- | 1,94 | down |
| 6099703 | 7215722 | 1412264 | --- | --- | --- | 2,43 | down |
| 6099759 | 7033337 | 969487  | --- | --- | --- | 1,48 | up   |
| 6099785 | 7028624 | 957999  | --- | --- | --- | 1,06 | up   |
| 6099791 | 7162959 | 1282087 | --- | --- | --- | 1,56 | down |
| 6099883 | 7384365 | 1830283 | --- | --- | --- | 1,02 | down |
| 6099996 | 7156052 | 1265787 | --- | --- | --- | 1,18 | up   |
| 6100130 | 7131889 | 1206090 | --- | --- | --- | 1,08 | up   |
| 6100136 | 7217650 | 1417174 | --- | --- | --- | 1,58 | up   |
| 6100164 | 7076236 | 1071181 | --- | --- | --- | 1,15 | down |
| 6100197 | 7193056 | 1358265 | --- | --- | --- | 1,25 | up   |
| 6100219 | 7120039 | 1177539 | --- | --- | --- | 1,96 | up   |
| 6100233 | 7180687 | 1326630 | --- | --- | --- | 1,10 | up   |
| 6100273 | 7112566 | 1158635 | --- | --- | --- | 1,41 | up   |
| 6100359 | 7350993 | 1747527 | --- | --- | --- | 1,13 | down |
| 6100391 | 7180630 | 1326450 | --- | --- | --- | 1,01 | up   |
| 6100399 | 7248790 | 1494549 | --- | --- | --- | 1,38 | up   |
| 6100437 | 7344406 | 1731189 | --- | --- | --- | 1,21 | down |
| 6100562 | 7315206 | 1660010 | --- | --- | --- | 1,52 | down |
| 6100614 | 7213945 | 1407836 | --- | --- | --- | 1,33 | down |
| 6100746 | 7062173 | 1036999 | --- | --- | --- | 1,09 | down |
| 6100971 | 7196029 | 1365602 | --- | --- | --- | 1,17 | up   |
| 6100997 | 7247954 | 1492388 | --- | --- | --- | 1,54 | up   |
| 6101078 | 7376820 | 1813453 | --- | --- | --- | 1,34 | down |
| 6101090 | 7065827 | 1045723 | --- | --- | --- | 1,43 | up   |
| 6101186 | 7039589 | 984517  | --- | --- | --- | 1,29 | down |
| 6101336 | 7211389 | 1402114 | --- | --- | --- | 1,10 | down |
| 6101352 | 7279793 | 1572529 | --- | --- | --- | 1,76 | down |
| 6101375 | 7235069 | 1460988 | --- | --- | --- | 1,14 | up   |
| 6101419 | 7131360 | 1204985 | --- | --- | --- | 1,13 | down |

|         |         |         |     |     |     |      |      |
|---------|---------|---------|-----|-----|-----|------|------|
| 6101454 | 7038153 | 981157  | --- | --- | --- | 1,49 | down |
| 6101552 | 7259923 | 1522527 | --- | --- | --- | 1,04 | down |
| 6101635 | 7284359 | 1583435 | --- | --- | --- | 1,10 | up   |
| 6101665 | 7196029 | 1365642 | --- | --- | --- | 1,14 | down |
| 6101707 | 7210135 | 1399456 | --- | --- | --- | 1,03 | up   |
| 6101736 | 7049399 | 1008333 | --- | --- | --- | 1,05 | down |
| 6101884 | 7371253 | 1799581 | --- | --- | --- | 1,05 | up   |
| 6101913 | 7280743 | 1574526 | --- | --- | --- | 1,04 | up   |
| 6101919 | 7231203 | 1450442 | --- | --- | --- | 1,07 | up   |
| 6101936 | 7274593 | 1558812 | --- | --- | --- | 1,65 | down |
| 6102010 | 7276231 | 1563115 | --- | --- | --- | 1,36 | down |
| 6102221 | 7323545 | 1679991 | --- | --- | --- | 1,03 | up   |
| 6102380 | 7232340 | 1453534 | --- | --- | --- | 1,43 | down |
| 6102484 | 7117187 | 1170151 | --- | --- | --- | 1,02 | up   |
| 6102547 | 7330396 | 1696358 | --- | --- | --- | 1,03 | down |
| 6102560 | 7360486 | 1770935 | --- | --- | --- | 1,59 | down |
| 6102673 | 7071264 | 1059362 | --- | --- | --- | 1,37 | down |
| 6102674 | 7316644 | 1664054 | --- | --- | --- | 1,12 | down |
| 6102718 | 7331434 | 1699198 | --- | --- | --- | 1,60 | up   |
| 6102812 | 7225553 | 1435972 | --- | --- | --- | 1,26 | up   |
| 6102975 | 7031774 | 964789  | --- | --- | --- | 1,03 | down |
| 6103115 | 7314270 | 1657749 | --- | --- | --- | 1,74 | down |
| 6103150 | 7268375 | 1543447 | --- | --- | --- | 1,31 | up   |
| 6103151 | 7243647 | 1482426 | --- | --- | --- | 1,02 | down |
| 6103192 | 7249503 | 1496221 | --- | --- | --- | 1,22 | down |
| 6103245 | 7213945 | 1407833 | --- | --- | --- | 1,42 | up   |
| 6103259 | 7079905 | 1079346 | --- | --- | --- | 2,84 | up   |
| 6103383 | 7115362 | 1165598 | --- | --- | --- | 1,33 | up   |
| 6103441 | 7353712 | 1753945 | --- | --- | --- | 1,31 | up   |
| 6103711 | 7320337 | 1673313 | --- | --- | --- | 1,24 | up   |
| 6103760 | 7052385 | 1014784 | --- | --- | --- | 1,05 | down |
| 6103889 | 7041609 | 989566  | --- | --- | --- | 1,24 | up   |
| 6103901 | 7052813 | 1015919 | --- | --- | --- | 1,37 | down |
| 6103910 | 7297274 | 1614660 | --- | --- | --- | 1,16 | down |
| 6104087 | 7156052 | 1265784 | --- | --- | --- | 1,08 | down |
| 6104528 | 7097240 | 1120369 | --- | --- | --- | 2,36 | down |
| 6104605 | 7295410 | 1609777 | --- | --- | --- | 1,54 | down |
| 6104616 | 7034293 | 971982  | --- | --- | --- | 2,99 | up   |
| 6104713 | 7352046 | 1750028 | --- | --- | --- | 1,06 | down |
| 6104793 | 7071714 | 1060359 | --- | --- | --- | 1,02 | up   |
| 6105131 | 7236358 | 1464218 | --- | --- | --- | 1,55 | down |
| 6105212 | 7336250 | 1710162 | --- | --- | --- | 1,35 | up   |
| 6105242 | 7186440 | 1341260 | --- | --- | --- | 1,50 | down |
| 6105299 | 7061703 | 1035736 | --- | --- | --- | 1,41 | down |
| 6105416 | 7294151 | 1606609 | --- | --- | --- | 1,07 | up   |
| 6105611 | 7148978 | 1248474 | --- | --- | --- | 1,10 | down |
| 6105787 | 7148978 | 1248496 | --- | --- | --- | 1,10 | up   |
| 6105929 | 7108300 | 1147916 | --- | --- | --- | 1,00 | down |
| 6106128 | 7243653 | 1482534 | --- | --- | --- | 1,04 | down |
| 6106143 | 7180243 | 1325513 | --- | --- | --- | 1,01 | up   |
| 6106169 | 7217747 | 1417512 | --- | --- | --- | 1,57 | up   |
| 6106224 | 7339110 | 1717609 | --- | --- | --- | 1,19 | down |
| 6106261 | 7300446 | 1622842 | --- | --- | --- | 1,78 | up   |
| 6106437 | 7233970 | 1458273 | --- | --- | --- | 1,10 | up   |
| 6106504 | 7376820 | 1813402 | --- | --- | --- | 1,26 | down |
| 6106507 | 7065827 | 1045726 | --- | --- | --- | 2,06 | up   |

|         |         |         |     |     |     |      |      |
|---------|---------|---------|-----|-----|-----|------|------|
| 6106600 | 7329075 | 1693373 | --- | --- | --- | 1,51 | down |
| 6106640 | 7180861 | 1327223 | --- | --- | --- | 1,03 | up   |
| 6106705 | 7034532 | 972654  | --- | --- | --- | 1,06 | up   |
| 6106802 | 7167507 | 1293148 | --- | --- | --- | 1,92 | up   |
| 6106990 | 7142416 | 1231800 | --- | --- | --- | 1,27 | up   |
| 6107103 | 7254405 | 1508642 | --- | --- | --- | 1,84 | up   |
| 6107361 | 7062529 | 1037880 | --- | --- | --- | 1,20 | down |
| 6107726 | 7083031 | 1086290 | --- | --- | --- | 1,03 | up   |
| 6107798 | 7337260 | 1712780 | --- | --- | --- | 1,19 | up   |
| 6107900 | 7049399 | 1008318 | --- | --- | --- | 1,15 | up   |
| 6107930 | 7108345 | 1148073 | --- | --- | --- | 2,01 | up   |
| 6107942 | 7067670 | 1050346 | --- | --- | --- | 1,07 | down |
| 6107945 | 7115362 | 1165614 | --- | --- | --- | 1,31 | down |
| 6107958 | 7341253 | 1723272 | --- | --- | --- | 1,18 | up   |
| 6107985 | 7310158 | 1647850 | --- | --- | --- | 1,53 | up   |
| 6108132 | 7101400 | 1130892 | --- | --- | --- | 1,10 | up   |
| 6108165 | 7323545 | 1679975 | --- | --- | --- | 1,13 | up   |
| 6108263 | 7267802 | 1541825 | --- | --- | --- | 1,06 | up   |
| 6108268 | 7325674 | 1685217 | --- | --- | --- | 1,03 | up   |
| 6108326 | 7361223 | 1772621 | --- | --- | --- | 1,17 | down |
| 6108398 | 7030863 | 962592  | --- | --- | --- | 1,34 | down |
| 6108440 | 7186464 | 1341382 | --- | --- | --- | 1,06 | up   |
| 6108459 | 7133749 | 1210807 | --- | --- | --- | 1,36 | up   |
| 6108495 | 7190844 | 1352140 | --- | --- | --- | 1,01 | down |
| 6108687 | 7043535 | 994087  | --- | --- | --- | 1,04 | down |
| 6108689 | 7279793 | 1572530 | --- | --- | --- | 1,10 | up   |
| 6108764 | 7027759 | 956128  | --- | --- | --- | 1,24 | up   |
| 6108775 | 7188681 | 1346293 | --- | --- | --- | 1,23 | down |
| 6108835 | 7323560 | 1680044 | --- | --- | --- | 1,54 | down |
| 6108845 | 7131103 | 1204320 | --- | --- | --- | 1,14 | up   |
| 6108900 | 7096898 | 1119518 | --- | --- | --- | 1,32 | down |
| 6109001 | 7226241 | 1437798 | --- | --- | --- | 1,19 | down |
| 6109033 | 7243653 | 1482532 | --- | --- | --- | 1,03 | up   |
| 6109084 | 7175368 | 1313287 | --- | --- | --- | 1,05 | down |
| 6109132 | 7068259 | 1051661 | --- | --- | --- | 1,09 | down |
| 6109184 | 7038969 | 982979  | --- | --- | --- | 1,02 | up   |
| 6109204 | 7324337 | 1682063 | --- | --- | --- | 1,05 | down |
| 6109280 | 7052385 | 1014806 | --- | --- | --- | 1,05 | down |
| 6109367 | 7180620 | 1326381 | --- | --- | --- | 1,07 | down |
| 6109375 | 7067670 | 1050344 | --- | --- | --- | 1,48 | down |
| 6109458 | 7244290 | 1484154 | --- | --- | --- | 1,10 | up   |
| 6109547 | 7098366 | 1123627 | --- | --- | --- | 1,25 | down |
| 6109672 | 7268375 | 1543442 | --- | --- | --- | 1,09 | up   |
| 6109822 | 7098126 | 1122978 | --- | --- | --- | 1,15 | up   |
| 6109837 | 7286807 | 1588821 | --- | --- | --- | 1,17 | up   |
| 6109860 | 7129696 | 1200587 | --- | --- | --- | 1,20 | down |
| 6109885 | 7177180 | 1317766 | --- | --- | --- | 1,93 | up   |
| 6109903 | 7034756 | 973219  | --- | --- | --- | 1,02 | down |
| 6109935 | 7245921 | 1487708 | --- | --- | --- | 1,06 | down |
| 6109981 | 7097680 | 1121715 | --- | --- | --- | 1,03 | up   |
| 6110011 | 7339379 | 1718330 | --- | --- | --- | 1,12 | up   |
| 6110013 | 7248790 | 1494503 | --- | --- | --- | 1,19 | up   |
| 6110063 | 7071681 | 1060279 | --- | --- | --- | 1,09 | down |
| 6110066 | 7249503 | 1496237 | --- | --- | --- | 1,16 | down |
| 6110117 | 7112671 | 1158975 | --- | --- | --- | 1,18 | up   |
| 6110200 | 7117187 | 1170151 | --- | --- | --- | 1,04 | up   |

|         |         |         |     |     |     |      |      |
|---------|---------|---------|-----|-----|-----|------|------|
| 6110227 | 7244290 | 1484156 | --- | --- | --- | 1,10 | down |
| 6110232 | 7033504 | 969865  | --- | --- | --- | 1,12 | up   |
| 6110277 | 7292154 | 1601672 | --- | --- | --- | 1,12 | up   |
| 6110407 | 7037495 | 979323  | --- | --- | --- | 1,72 | down |
| 6110465 | 7199341 | 1374165 | --- | --- | --- | 1,35 | up   |
| 6110474 | 7186464 | 1341363 | --- | --- | --- | 1,04 | down |
| 6110536 | 7363674 | 1778416 | --- | --- | --- | 1,12 | up   |
| 6110554 | 7243130 | 1480916 | --- | --- | --- | 1,28 | up   |
| 6110562 | 7115362 | 1165612 | --- | --- | --- | 1,08 | up   |
| 6110568 | 7337492 | 1713403 | --- | --- | --- | 2,89 | down |
| 6110678 | 7358859 | 1767004 | --- | --- | --- | 1,14 | up   |
| 6110700 | 7199341 | 1374128 | --- | --- | --- | 1,50 | down |
| 6110730 | 7248790 | 1494496 | --- | --- | --- | 1,02 | up   |
| 6110809 | 7293757 | 1605688 | --- | --- | --- | 3,38 | up   |
| 6110961 | 7111361 | 1155599 | --- | --- | --- | 1,09 | down |
| 6110963 | 7352044 | 1750009 | --- | --- | --- | 1,69 | up   |
| 6110968 | 7144389 | 1236778 | --- | --- | --- | 1,19 | down |
| 6111001 | 7265259 | 1535453 | --- | --- | --- | 1,18 | down |
| 6111008 | 7305674 | 1636829 | --- | --- | --- | 2,16 | up   |
| 6111056 | 7050726 | 1011253 | --- | --- | --- | 1,01 | up   |
| 6111066 | 7059961 | 1031399 | --- | --- | --- | 2,49 | down |
| 6111073 | 7180732 | 1326724 | --- | --- | --- | 1,04 | up   |
| 6111118 | 7233440 | 1456854 | --- | --- | --- | 1,00 | up   |
| 6111245 | 7112225 | 1157615 | --- | --- | --- | 1,20 | down |
| 6111338 | 7279568 | 1572024 | --- | --- | --- | 1,05 | up   |
| 6111375 | 7378997 | 1818642 | --- | --- | --- | 1,69 | down |
| 6111398 | 7338807 | 1716786 | --- | --- | --- | 1,13 | up   |
| 6111460 | 7033337 | 969518  | --- | --- | --- | 1,09 | up   |
| 6111487 | 7384509 | 1830748 | --- | --- | --- | 1,00 | down |
| 6111500 | 7086522 | 1093953 | --- | --- | --- | 2,21 | down |
| 6111540 | 7075445 | 1069350 | --- | --- | --- | 2,03 | down |
| 6111565 | 7320337 | 1673322 | --- | --- | --- | 1,08 | up   |
| 6111831 | 7279568 | 1572015 | --- | --- | --- | 1,11 | down |
| 6111875 | 7268457 | 1543637 | --- | --- | --- | 1,07 | down |
| 6112132 | 7171525 | 1303428 | --- | --- | --- | 1,18 | down |
| 6112182 | 7221453 | 1426341 | --- | --- | --- | 1,04 | up   |
| 6112244 | 7036412 | 976851  | --- | --- | --- | 1,03 | up   |
| 6112359 | 7069830 | 1055589 | --- | --- | --- | 1,85 | down |
| 6112381 | 7274892 | 1559551 | --- | --- | --- | 1,07 | down |
| 6112480 | 7225213 | 1435121 | --- | --- | --- | 1,24 | up   |
| 6112500 | 7354688 | 1756376 | --- | --- | --- | 1,84 | up   |
| 6112525 | 7113483 | 1161002 | --- | --- | --- | 1,51 | up   |
| 6112534 | 7117526 | 1171032 | --- | --- | --- | 1,80 | up   |
| 6112535 | 7359551 | 1768641 | --- | --- | --- | 1,03 | up   |
| 6112577 | 7119930 | 1177203 | --- | --- | --- | 1,18 | up   |
| 6112611 | 7093936 | 1112472 | --- | --- | --- | 1,02 | up   |
| 6112685 | 7323545 | 1679935 | --- | --- | --- | 1,16 | down |
| 6112694 | 7196803 | 1367342 | --- | --- | --- | 1,11 | up   |
| 6112702 | 7383655 | 1828574 | --- | --- | --- | 1,00 | up   |
| 6112746 | 7377583 | 1815461 | --- | --- | --- | 1,21 | down |
| 6112760 | 7117158 | 1170027 | --- | --- | --- | 1,05 | down |
| 6112827 | 7236358 | 1464221 | --- | --- | --- | 1,17 | down |
| 6112848 | 7312566 | 1653294 | --- | --- | --- | 1,57 | down |
| 6112903 | 7342414 | 1726093 | --- | --- | --- | 1,27 | up   |
| 6112910 | 7380497 | 1821838 | --- | --- | --- | 1,04 | down |
| 6112943 | 7071969 | 1060891 | --- | --- | --- | 1,56 | up   |

|         |         |         |     |     |     |      |      |
|---------|---------|---------|-----|-----|-----|------|------|
| 6112997 | 7240569 | 1475449 | --- | --- | --- | 1,09 | up   |
| 6113018 | 7289909 | 1596509 | --- | --- | --- | 1,09 | down |
| 6113088 | 7270574 | 1548527 | --- | --- | --- | 2,13 | up   |
| 6113128 | 7054958 | 1020586 | --- | --- | --- | 1,39 | up   |
| 6113171 | 7338807 | 1716795 | --- | --- | --- | 1,48 | down |
| 6113236 | 7258520 | 1518863 | --- | --- | --- | 1,00 | up   |
| 6113295 | 7277783 | 1567470 | --- | --- | --- | 1,67 | up   |
| 6113315 | 7059020 | 1029338 | --- | --- | --- | 1,81 | up   |
| 6113318 | 7236395 | 1464344 | --- | --- | --- | 1,06 | down |
| 6113496 | 7033672 | 970368  | --- | --- | --- | 1,12 | up   |
| 6113509 | 7101400 | 1130921 | --- | --- | --- | 1,15 | down |
| 6113722 | 7058813 | 1028899 | --- | --- | --- | 1,10 | down |
| 6113730 | 7042049 | 990654  | --- | --- | --- | 1,02 | up   |
| 6113770 | 7115362 | 1165605 | --- | --- | --- | 1,44 | up   |
| 6113907 | 7156763 | 1267754 | --- | --- | --- | 2,51 | down |
| 6114050 | 7052567 | 1015262 | --- | --- | --- | 2,93 | down |
| 6114064 | 7344630 | 1731946 | --- | --- | --- | 1,14 | up   |
| 6114070 | 7050930 | 1011608 | --- | --- | --- | 1,06 | down |
| 6114094 | 7235069 | 1460972 | --- | --- | --- | 1,22 | down |
| 6114338 | 7378878 | 1818329 | --- | --- | --- | 1,24 | down |
| 6114396 | 7191594 | 1354171 | --- | --- | --- | 1,70 | up   |
| 6114480 | 7364995 | 1781295 | --- | --- | --- | 1,13 | up   |
| 6114514 | 7248790 | 1494537 | --- | --- | --- | 1,20 | down |
| 6114578 | 7052331 | 1014567 | --- | --- | --- | 1,22 | up   |
| 6114579 | 7264808 | 1534468 | --- | --- | --- | 1,08 | down |
| 6114621 | 7063515 | 1039643 | --- | --- | --- | 1,05 | down |
| 6114647 | 7249503 | 1496192 | --- | --- | --- | 1,07 | up   |
| 6114691 | 7097485 | 1120940 | --- | --- | --- | 1,01 | down |
| 6114728 | 7236358 | 1464245 | --- | --- | --- | 1,42 | up   |
| 6114820 | 7059375 | 1030074 | --- | --- | --- | 1,12 | up   |
| 6114846 | 7147828 | 1245565 | --- | --- | --- | 1,09 | down |
| 6114869 | 7071264 | 1059284 | --- | --- | --- | 1,33 | up   |
| 6114944 | 7099650 | 1126885 | --- | --- | --- | 1,04 | up   |
| 6115106 | 7364346 | 1780000 | --- | --- | --- | 1,27 | up   |
| 6115117 | 7341546 | 1723971 | --- | --- | --- | 1,03 | down |
| 6115309 | 7359551 | 1768625 | --- | --- | --- | 2,28 | down |
| 6115315 | 7264797 | 1534421 | --- | --- | --- | 1,09 | down |
| 6115382 | 7243628 | 1482382 | --- | --- | --- | 1,02 | down |
| 6115389 | 7073950 | 1065898 | --- | --- | --- | 1,41 | up   |
| 6115425 | 7210600 | 1400524 | --- | --- | --- | 1,09 | down |
| 6115454 | 7067670 | 1050318 | --- | --- | --- | 1,75 | up   |
| 6115475 | 7332970 | 1702554 | --- | --- | --- | 1,11 | up   |
| 6115535 | 7356027 | 1759981 | --- | --- | --- | 1,44 | up   |
| 6115553 | 7132125 | 1206629 | --- | --- | --- | 1,07 | down |
| 6115586 | 7276762 | 1564512 | --- | --- | --- | 1,15 | down |
| 6115608 | 7070616 | 1057797 | --- | --- | --- | 1,84 | down |
| 6115615 | 7042382 | 991289  | --- | --- | --- | 1,02 | down |
| 6115631 | 7384509 | 1830750 | --- | --- | --- | 1,13 | down |
| 6115777 | 7049399 | 1008347 | --- | --- | --- | 1,03 | up   |
| 6115785 | 7279568 | 1572003 | --- | --- | --- | 1,18 | up   |
| 6115788 | 7312621 | 1653459 | --- | --- | --- | 1,01 | down |
| 6115794 | 7331434 | 1699209 | --- | --- | --- | 1,21 | down |
| 6115799 | 7217679 | 1417316 | --- | --- | --- | 1,11 | up   |
| 6115804 | 7249503 | 1496227 | --- | --- | --- | 1,06 | down |
| 6115852 | 7111573 | 1156024 | --- | --- | --- | 1,06 | down |
| 6115853 | 7350489 | 1746129 | --- | --- | --- | 1,56 | up   |

|         |         |         |     |     |     |      |      |
|---------|---------|---------|-----|-----|-----|------|------|
| 6116192 | 7378997 | 1818674 | --- | --- | --- | 1,15 | up   |
| 6116241 | 7242490 | 1479443 | --- | --- | --- | 1,05 | up   |
| 6116468 | 7142081 | 1230979 | --- | --- | --- | 1,38 | down |
| 6116506 | 7060851 | 1033419 | --- | --- | --- | 1,36 | up   |
| 6116541 | 7097525 | 1121043 | --- | --- | --- | 1,07 | down |
| 6116549 | 7096924 | 1119613 | --- | --- | --- | 1,32 | down |
| 6116577 | 7207069 | 1392032 | --- | --- | --- | 1,59 | down |
| 6116630 | 7236395 | 1464345 | --- | --- | --- | 1,07 | up   |
| 6116672 | 7068504 | 1052161 | --- | --- | --- | 3,30 | up   |
| 6116674 | 7264797 | 1534431 | --- | --- | --- | 1,00 | up   |
| 6116689 | 7203872 | 1384774 | --- | --- | --- | 1,65 | up   |
| 6116762 | 7263401 | 1531001 | --- | --- | --- | 1,36 | down |
| 6116944 | 7331732 | 1699989 | --- | --- | --- | 1,19 | down |
| 6117048 | 7239939 | 1473788 | --- | --- | --- | 1,05 | up   |
| 6117051 | 7249503 | 1496184 | --- | --- | --- | 1,07 | up   |
| 6117084 | 7374740 | 1808618 | --- | --- | --- | 1,06 | down |
| 6117150 | 7119930 | 1177226 | --- | --- | --- | 1,93 | down |
| 6117240 | 7303616 | 1631361 | --- | --- | --- | 1,16 | up   |
| 6117257 | 7069253 | 1054156 | --- | --- | --- | 1,06 | up   |
| 6117402 | 7339110 | 1717614 | --- | --- | --- | 1,02 | down |
| 6117441 | 7177180 | 1317787 | --- | --- | --- | 1,62 | down |
| 6117454 | 7065265 | 1044574 | --- | --- | --- | 1,76 | up   |
| 6117501 | 7037764 | 979970  | --- | --- | --- | 1,52 | down |
| 6117705 | 7360486 | 1771001 | --- | --- | --- | 1,98 | up   |
| 6117720 | 7289856 | 1596343 | --- | --- | --- | 1,05 | down |
| 6117831 | 7229886 | 1447169 | --- | --- | --- | 1,06 | up   |
| 6117982 | 7245921 | 1487710 | --- | --- | --- | 1,14 | down |
| 6118067 | 7280743 | 1574554 | --- | --- | --- | 1,56 | up   |
| 6118095 | 7119930 | 1177230 | --- | --- | --- | 1,44 | down |
| 6118099 | 7162959 | 1282085 | --- | --- | --- | 1,67 | down |
| 6118158 | 7053874 | 1018338 | --- | --- | --- | 2,06 | down |
| 6118256 | 7238115 | 1468659 | --- | --- | --- | 1,11 | down |
| 6118349 | 7050930 | 1011631 | --- | --- | --- | 1,01 | up   |
| 6118413 | 7364346 | 1779995 | --- | --- | --- | 1,52 | up   |
| 6118439 | 7359551 | 1768641 | --- | --- | --- | 1,02 | up   |
| 6118480 | 7321029 | 1674814 | --- | --- | --- | 1,36 | down |
| 6118546 | 7243647 | 1482446 | --- | --- | --- | 1,03 | up   |
| 6118620 | 7243647 | 1482472 | --- | --- | --- | 1,12 | down |
| 6118693 | 7103337 | 1135941 | --- | --- | --- | 1,78 | up   |
| 6118714 | 7197820 | 1370096 | --- | --- | --- | 3,18 | down |
| 6118904 | 7339379 | 1718361 | --- | --- | --- | 1,18 | down |
| 6118920 | 7238202 | 1468945 | --- | --- | --- | 1,52 | up   |
| 6118937 | 7289382 | 1595211 | --- | --- | --- | 2,20 | down |
| 6118966 | 7107321 | 1145323 | --- | --- | --- | 1,11 | up   |
| 6119087 | 7243130 | 1480934 | --- | --- | --- | 1,42 | down |
| 6119091 | 7050930 | 1011616 | --- | --- | --- | 1,42 | down |
| 6119150 | 7280743 | 1574515 | --- | --- | --- | 1,66 | down |
| 6119235 | 7039223 | 983564  | --- | --- | --- | 1,13 | up   |
| 6119290 | 7261766 | 1527155 | --- | --- | --- | 1,29 | down |
| 6119382 | 7230698 | 1449061 | --- | --- | --- | 1,46 | down |
| 6119432 | 7215722 | 1412266 | --- | --- | --- | 2,37 | down |
| 6119446 | 7110330 | 1152925 | --- | --- | --- | 1,17 | up   |
| 6119481 | 7040260 | 986060  | --- | --- | --- | 1,12 | up   |
| 6119516 | 7246866 | 1489794 | --- | --- | --- | 1,11 | up   |
| 6119652 | 7303635 | 1631459 | --- | --- | --- | 1,18 | up   |
| 6119718 | 7378997 | 1818659 | --- | --- | --- | 1,08 | down |



|         |         |         |     |     |     |      |      |
|---------|---------|---------|-----|-----|-----|------|------|
| 6119725 | 7049399 | 1008329 | --- | --- | --- | 1,18 | up   |
| 6119726 | 7281507 | 1576699 | --- | --- | --- | 1,60 | down |
| 6120041 | 7291054 | 1599400 | --- | --- | --- | 1,01 | down |
| 6120062 | 7033504 | 969852  | --- | --- | --- | 1,44 | up   |
| 6120093 | 7351951 | 1749840 | --- | --- | --- | 1,04 | up   |
| 6120205 | 7338101 | 1715194 | --- | --- | --- | 1,25 | up   |
| 6120222 | 7062436 | 1037708 | --- | --- | --- | 1,39 | up   |
| 6120283 | 7330238 | 1695956 | --- | --- | --- | 1,09 | down |
| 6120354 | 7323545 | 1679971 | --- | --- | --- | 1,31 | up   |
| 6120400 | 7338807 | 1716790 | --- | --- | --- | 1,20 | up   |
| 6120482 | 7176235 | 1315237 | --- | --- | --- | 1,27 | down |
| 6120505 | 7230886 | 1449533 | --- | --- | --- | 1,33 | down |
| 6120656 | 7367971 | 1789122 | --- | --- | --- | 1,03 | down |
| 6120691 | 7067614 | 1050200 | --- | --- | --- | 1,07 | up   |
| 6120743 | 7142853 | 1232883 | --- | --- | --- | 1,05 | up   |
| 6120850 | 7301900 | 1626742 | --- | --- | --- | 2,48 | down |
| 6120875 | 7358859 | 1766964 | --- | --- | --- | 1,08 | down |
| 6120964 | 7162144 | 1280513 | --- | --- | --- | 1,86 | up   |
| 6120981 | 7247954 | 1492399 | --- | --- | --- | 1,05 | down |
| 6121109 | 7097525 | 1121032 | --- | --- | --- | 1,27 | up   |
| 6121172 | 7132834 | 1208326 | --- | --- | --- | 1,14 | up   |
| 6121176 | 7064134 | 1041454 | --- | --- | --- | 1,17 | down |
| 6121180 | 7287337 | 1589972 | --- | --- | --- | 2,89 | down |
| 6121212 | 7337224 | 1712611 | --- | --- | --- | 1,44 | down |
| 6121253 | 7327169 | 1688462 | --- | --- | --- | 1,47 | down |
| 6121260 | 7303616 | 1631347 | --- | --- | --- | 1,08 | up   |
| 6121265 | 7281507 | 1576717 | --- | --- | --- | 1,39 | down |
| 6121268 | 7346066 | 1735287 | --- | --- | --- | 1,12 | up   |
| 6121409 | 7078666 | 1076507 | --- | --- | --- | 1,09 | down |
| 6121473 | 7200129 | 1375994 | --- | --- | --- | 2,42 | up   |
| 6121489 | 7333462 | 1703644 | --- | --- | --- | 1,00 | up   |
| 6121545 | 7207069 | 1392024 | --- | --- | --- | 1,63 | down |
| 6121604 | 7069830 | 1055646 | --- | --- | --- | 1,17 | up   |
| 6121648 | 7120827 | 1179350 | --- | --- | --- | 1,36 | down |
| 6121743 | 7235069 | 1460978 | --- | --- | --- | 1,19 | down |
| 6121797 | 7115362 | 1165605 | --- | --- | --- | 1,51 | down |
| 6121830 | 7120827 | 1179345 | --- | --- | --- | 1,64 | down |
| 6121873 | 7312575 | 1653359 | --- | --- | --- | 1,19 | down |
| 6121946 | 7331413 | 1699134 | --- | --- | --- | 1,08 | down |
| 6121960 | 7213908 | 1407759 | --- | --- | --- | 2,00 | up   |
| 6122100 | 7217747 | 1417510 | --- | --- | --- | 1,20 | down |
| 6122139 | 7127691 | 1195635 | --- | --- | --- | 1,35 | up   |
| 6122372 | 7039463 | 984254  | --- | --- | --- | 1,31 | down |
| 6122441 | 7115362 | 1165597 | --- | --- | --- | 1,08 | up   |
| 6122443 | 7078273 | 1075819 | --- | --- | --- | 1,29 | down |
| 6122509 | 7385253 | 1832225 | --- | --- | --- | 1,33 | down |
| 6122525 | 7258784 | 1519674 | --- | --- | --- | 1,56 | up   |
| 6122619 | 7342959 | 1727349 | --- | --- | --- | 1,43 | down |
| 6122620 | 7032618 | 967334  | --- | --- | --- | 1,01 | up   |
| 6122656 | 7303616 | 1631383 | --- | --- | --- | 1,55 | up   |
| 6122668 | 7373634 | 1805723 | --- | --- | --- | 1,32 | up   |
| 6122761 | 7244290 | 1484150 | --- | --- | --- | 1,17 | up   |
| 6122785 | 7092549 | 1109142 | --- | --- | --- | 1,35 | down |
| 6122963 | 7068942 | 1053375 | --- | --- | --- | 1,08 | down |
| 6122965 | 7361223 | 1772619 | --- | --- | --- | 1,37 | up   |
| 6122970 | 7290793 | 1598636 | --- | --- | --- | 1,67 | up   |

|         |         |         |     |     |     |      |      |
|---------|---------|---------|-----|-----|-----|------|------|
| 6123047 | 7043535 | 994083  | --- | --- | --- | 1,11 | down |
| 6123089 | 7338807 | 1716830 | --- | --- | --- | 1,36 | up   |
| 6123115 | 7263152 | 1530365 | --- | --- | --- | 1,06 | up   |
| 6123171 | 7155286 | 1263908 | --- | --- | --- | 1,09 | down |
| 6123192 | 7061550 | 1035290 | --- | --- | --- | 1,44 | up   |
| 6123221 | 7037235 | 978575  | --- | --- | --- | 3,25 | down |
| 6123241 | 7316644 | 1664041 | --- | --- | --- | 1,06 | up   |
| 6123253 | 7210263 | 1399750 | --- | --- | --- | 1,55 | down |
| 6123305 | 7228848 | 1444755 | --- | --- | --- | 1,39 | down |
| 6123382 | 7359551 | 1768641 | --- | --- | --- | 1,02 | down |
| 6123406 | 7052933 | 1016214 | --- | --- | --- | 2,59 | up   |
| 6123425 | 7226241 | 1437789 | --- | --- | --- | 1,44 | down |
| 6123483 | 7258520 | 1518889 | --- | --- | --- | 1,02 | up   |
| 6123802 | 7099449 | 1126374 | --- | --- | --- | 1,31 | up   |
| 6123843 | 7068942 | 1053385 | --- | --- | --- | 1,14 | down |
| 6123862 | 7240569 | 1475380 | --- | --- | --- | 1,05 | up   |
| 6123957 | 7281140 | 1575714 | --- | --- | --- | 1,05 | up   |
| 6124172 | 7248964 | 1494942 | --- | --- | --- | 1,16 | down |
| 6124237 | 7305674 | 1636851 | --- | --- | --- | 1,47 | up   |
| 6124244 | 7067670 | 1050314 | --- | --- | --- | 2,20 | up   |
| 6124264 | 7320337 | 1673340 | --- | --- | --- | 1,15 | up   |
| 6124317 | 7373678 | 1805882 | --- | --- | --- | 1,10 | up   |
| 6124441 | 7249503 | 1496235 | --- | --- | --- | 1,11 | up   |
| 6124484 | 7217679 | 1417323 | --- | --- | --- | 1,22 | down |
| 6124564 | 7240569 | 1475460 | --- | --- | --- | 1,13 | up   |
| 6124753 | 7213908 | 1407697 | --- | --- | --- | 1,15 | up   |
| 6124777 | 7132834 | 1208324 | --- | --- | --- | 1,21 | up   |
| 6124819 | 7349817 | 1744600 | --- | --- | --- | 1,64 | up   |
| 6124864 | 7319937 | 1672297 | --- | --- | --- | 1,32 | up   |
| 6124884 | 7131360 | 1204983 | --- | --- | --- | 1,09 | down |
| 6124895 | 7361420 | 1773048 | --- | --- | --- | 1,35 | up   |
| 6124961 | 7268693 | 1544175 | --- | --- | --- | 1,54 | down |
| 6125147 | 7062173 | 1036991 | --- | --- | --- | 1,32 | down |
| 6125191 | 7336250 | 1710169 | --- | --- | --- | 2,29 | down |
| 6125274 | 7059721 | 1030852 | --- | --- | --- | 1,25 | down |
| 6125431 | 7361042 | 1772263 | --- | --- | --- | 1,29 | down |
| 6125472 | 7295410 | 1609733 | --- | --- | --- | 1,00 | down |
| 6125584 | 7236358 | 1464255 | --- | --- | --- | 1,47 | up   |
| 6125594 | 7291054 | 1599402 | --- | --- | --- | 1,36 | down |
| 6125674 | 7108345 | 1148087 | --- | --- | --- | 1,24 | down |
| 6125679 | 7330238 | 1695939 | --- | --- | --- | 1,06 | up   |
| 6125715 | 7181169 | 1328104 | --- | --- | --- | 1,02 | down |
| 6125798 | 7231775 | 1452128 | --- | --- | --- | 1,18 | up   |
| 6125803 | 7198210 | 1371003 | --- | --- | --- | 1,45 | up   |
| 6125818 | 7279555 | 1571950 | --- | --- | --- | 2,15 | up   |
| 6125892 | 7211389 | 1402113 | --- | --- | --- | 1,07 | down |
| 6126001 | 7059020 | 1029353 | --- | --- | --- | 1,15 | up   |
| 6126194 | 7061003 | 1033922 | --- | --- | --- | 1,13 | down |
| 6126270 | 7112225 | 1157617 | --- | --- | --- | 2,04 | up   |
| 6126280 | 7254405 | 1508671 | --- | --- | --- | 1,34 | up   |
| 6126550 | 7255663 | 1511721 | --- | --- | --- | 1,47 | down |
| 6126728 | 7073950 | 1065859 | --- | --- | --- | 1,27 | up   |
| 6126729 | 7033504 | 969851  | --- | --- | --- | 1,04 | down |
| 6126798 | 7113483 | 1161007 | --- | --- | --- | 1,06 | down |
| 6126846 | 7323545 | 1679964 | --- | --- | --- | 1,46 | down |
| 6126880 | 7234040 | 1458505 | --- | --- | --- | 1,12 | down |

|         |         |         |     |     |     |      |      |
|---------|---------|---------|-----|-----|-----|------|------|
| 6126889 | 7025652 | 950335  | --- | --- | --- | 1,16 | down |
| 6126924 | 7082098 | 1084118 | --- | --- | --- | 1,02 | down |
| 6127011 | 7274780 | 1559244 | --- | --- | --- | 1,05 | down |
| 6127131 | 7231775 | 1452124 | --- | --- | --- | 1,16 | up   |
| 6127258 | 7074132 | 1066323 | --- | --- | --- | 1,07 | up   |
| 6127433 | 7059020 | 1029334 | --- | --- | --- | 1,20 | down |
| 6127477 | 7331413 | 1699133 | --- | --- | --- | 1,27 | up   |
| 6127496 | 7267380 | 1540386 | --- | --- | --- | 1,32 | up   |
| 6127645 | 7333333 | 1703398 | --- | --- | --- | 1,63 | up   |
| 6127654 | 7186305 | 1341004 | --- | --- | --- | 1,45 | down |
| 6127683 | 7273223 | 1555883 | --- | --- | --- | 1,42 | up   |
| 6127766 | 7127257 | 1194807 | --- | --- | --- | 2,10 | up   |
| 6127991 | 7119930 | 1177201 | --- | --- | --- | 1,07 | up   |
| 6128005 | 7337845 | 1714355 | --- | --- | --- | 1,74 | down |
| 6128017 | 7291129 | 1599592 | --- | --- | --- | 1,50 | up   |
| 6128108 | 7358048 | 1764794 | --- | --- | --- | 1,09 | down |
| 6128222 | 7115880 | 1166818 | --- | --- | --- | 1,09 | up   |
| 6128259 | 7152889 | 1257356 | --- | --- | --- | 1,50 | down |
| 6128318 | 7237711 | 1467468 | --- | --- | --- | 2,48 | down |
| 6128441 | 7190524 | 1351187 | --- | --- | --- | 1,00 | down |
| 6128635 | 7196029 | 1365634 | --- | --- | --- | 1,09 | down |
| 6128713 | 7180861 | 1327222 | --- | --- | --- | 1,39 | down |
| 6128755 | 7125348 | 1190098 | --- | --- | --- | 1,59 | up   |
| 6128790 | 7059584 | 1030546 | --- | --- | --- | 1,54 | down |
| 6128804 | 7344836 | 1732409 | --- | --- | --- | 1,08 | up   |
| 6128853 | 7368684 | 1791857 | --- | --- | --- | 1,12 | up   |
| 6128987 | 7083160 | 1086540 | --- | --- | --- | 1,19 | down |
| 6129148 | 7228848 | 1444755 | --- | --- | --- | 1,11 | up   |
| 6129150 | 7037764 | 979978  | --- | --- | --- | 1,04 | up   |
| 6129239 | 7095021 | 1115126 | --- | --- | --- | 1,47 | down |
| 6129249 | 7025652 | 950309  | --- | --- | --- | 1,85 | up   |
| 6129290 | 7112566 | 1158635 | --- | --- | --- | 1,02 | up   |
| 6129329 | 7280743 | 1574505 | --- | --- | --- | 1,11 | down |
| 6129332 | 7274780 | 1559214 | --- | --- | --- | 1,38 | down |
| 6129339 | 7297589 | 1615661 | --- | --- | --- | 1,01 | up   |
| 6129484 | 7031774 | 964736  | --- | --- | --- | 1,62 | down |
| 6129515 | 7156052 | 1265770 | --- | --- | --- | 1,07 | down |
| 6129548 | 7341546 | 1723955 | --- | --- | --- | 1,17 | down |
| 6129617 | 7038610 | 982074  | --- | --- | --- | 1,09 | up   |
| 6129780 | 7033337 | 969500  | --- | --- | --- | 1,23 | up   |
| 6129981 | 7319937 | 1672300 | --- | --- | --- | 1,17 | down |
| 6130044 | 7081731 | 1083307 | --- | --- | --- | 1,34 | down |
| 6130050 | 7098366 | 1123619 | --- | --- | --- | 1,21 | down |
| 6130255 | 7333152 | 1702956 | --- | --- | --- | 1,71 | up   |
| 6130298 | 7369938 | 1795527 | --- | --- | --- | 1,07 | up   |
| 6130393 | 7080731 | 1080968 | --- | --- | --- | 1,33 | down |
| 6130403 | 7319937 | 1672255 | --- | --- | --- | 2,10 | up   |
| 6130404 | 7335091 | 1707325 | --- | --- | --- | 1,13 | up   |
| 6130598 | 7351951 | 1749817 | --- | --- | --- | 1,10 | down |
| 6130681 | 7031576 | 964108  | --- | --- | --- | 1,13 | up   |
| 6130688 | 7025652 | 950321  | --- | --- | --- | 1,09 | down |
| 6130712 | 7316644 | 1664052 | --- | --- | --- | 1,05 | down |
| 6130816 | 7068086 | 1051199 | --- | --- | --- | 1,08 | up   |
| 6130904 | 7294866 | 1608382 | --- | --- | --- | 1,59 | down |
| 6130993 | 7265259 | 1535439 | --- | --- | --- | 1,68 | down |
| 6131015 | 7261592 | 1526855 | --- | --- | --- | 1,40 | down |

|         |         |         |     |     |     |      |      |
|---------|---------|---------|-----|-----|-----|------|------|
| 6131087 | 7139026 | 1223504 | --- | --- | --- | 1,15 | down |
| 6131124 | 7297589 | 1615687 | --- | --- | --- | 1,03 | up   |
| 6131259 | 7068259 | 1051651 | --- | --- | --- | 1,32 | down |
| 6131280 | 7036412 | 976860  | --- | --- | --- | 1,22 | up   |
| 6131384 | 7065655 | 1045251 | --- | --- | --- | 1,03 | up   |
| 6131470 | 7330396 | 1696361 | --- | --- | --- | 1,03 | up   |
| 6131542 | 7260613 | 1524293 | --- | --- | --- | 1,24 | down |
| 6131580 | 7101643 | 1131595 | --- | --- | --- | 2,67 | up   |
| 6131592 | 7108345 | 1148081 | --- | --- | --- | 1,31 | up   |
| 6131608 | 7294264 | 1606865 | --- | --- | --- | 1,28 | down |
| 6131619 | 7358048 | 1764801 | --- | --- | --- | 1,08 | down |
| 6132002 | 7290288 | 1597340 | --- | --- | --- | 1,50 | up   |
| 6132041 | 7059375 | 1030061 | --- | --- | --- | 1,44 | up   |
| 6132058 | 7365183 | 1781905 | --- | --- | --- | 1,10 | up   |
| 6132110 | 7119930 | 1177227 | --- | --- | --- | 1,28 | up   |
| 6132193 | 7145669 | 1239989 | --- | --- | --- | 3,12 | up   |
| 6132333 | 7069830 | 1055648 | --- | --- | --- | 1,69 | down |
| 6132343 | 7197056 | 1367838 | --- | --- | --- | 1,22 | up   |
| 6132359 | 7114108 | 1162447 | --- | --- | --- | 1,13 | down |
| 6132481 | 7277719 | 1567088 | --- | --- | --- | 1,50 | down |
| 6132491 | 7319937 | 1672262 | --- | --- | --- | 1,66 | up   |
| 6132544 | 7333333 | 1703404 | --- | --- | --- | 2,64 | up   |
| 6132725 | 7172373 | 1305583 | --- | --- | --- | 1,11 | up   |
| 6132799 | 7337902 | 1714547 | --- | --- | --- | 2,29 | up   |
| 6132809 | 7199476 | 1374568 | --- | --- | --- | 1,58 | up   |
| 6132840 | 7339110 | 1717619 | --- | --- | --- | 1,09 | up   |
| 6132843 | 7290161 | 1597072 | --- | --- | --- | 1,20 | down |
| 6132897 | 7070455 | 1057352 | --- | --- | --- | 1,48 | down |
| 6132927 | 7217679 | 1417310 | --- | --- | --- | 2,57 | down |
| 6133035 | 7229886 | 1447171 | --- | --- | --- | 1,01 | down |
| 6133093 | 7360486 | 1771013 | --- | --- | --- | 1,19 | down |
| 6133131 | 7132024 | 1206337 | --- | --- | --- | 1,14 | up   |
| 6133134 | 7341253 | 1723302 | --- | --- | --- | 1,09 | up   |
| 6133196 | 7312903 | 1654102 | --- | --- | --- | 1,09 | up   |
| 6133254 | 7344836 | 1732410 | --- | --- | --- | 1,15 | up   |
| 6133273 | 7317088 | 1665022 | --- | --- | --- | 1,06 | up   |
| 6133274 | 7343122 | 1727727 | --- | --- | --- | 1,39 | down |
| 6133288 | 7277719 | 1567089 | --- | --- | --- | 1,34 | down |
| 6133306 | 7364346 | 1780043 | --- | --- | --- | 1,74 | down |
| 6133473 | 7033616 | 970207  | --- | --- | --- | 1,15 | up   |
| 6133493 | 7343122 | 1727723 | --- | --- | --- | 1,33 | up   |
| 6133592 | 7098810 | 1124656 | --- | --- | --- | 1,03 | up   |
| 6133597 | 7360325 | 1770490 | --- | --- | --- | 1,16 | down |
| 6133617 | 7243647 | 1482455 | --- | --- | --- | 1,10 | up   |
| 6133878 | 7180630 | 1326455 | --- | --- | --- | 1,15 | down |
| 6133918 | 7265259 | 1535440 | --- | --- | --- | 2,15 | up   |
| 6134032 | 7072552 | 1062126 | --- | --- | --- | 1,33 | up   |
| 6134034 | 7299512 | 1620557 | --- | --- | --- | 1,42 | up   |
| 6134058 | 7131360 | 1204987 | --- | --- | --- | 1,64 | down |
| 6134076 | 7344530 | 1731568 | --- | --- | --- | 1,02 | down |
| 6134084 | 7101400 | 1130896 | --- | --- | --- | 1,27 | up   |
| 6134126 | 7341397 | 1723650 | --- | --- | --- | 1,15 | up   |
| 6134175 | 7036412 | 976850  | --- | --- | --- | 1,28 | up   |
| 6134203 | 7095021 | 1115130 | --- | --- | --- | 1,62 | up   |
| 6134214 | 7371643 | 1800645 | --- | --- | --- | 1,25 | down |
| 6134262 | 7323545 | 1679990 | --- | --- | --- | 1,75 | up   |

|         |         |         |     |     |     |      |      |
|---------|---------|---------|-----|-----|-----|------|------|
| 6134326 | 7369712 | 1794834 | --- | --- | --- | 1,95 | up   |
| 6134490 | 7059020 | 1029340 | --- | --- | --- | 1,12 | up   |
| 6134567 | 7112225 | 1157590 | --- | --- | --- | 1,40 | up   |
| 6134568 | 7162144 | 1280493 | --- | --- | --- | 1,54 | down |
| 6134686 | 7148271 | 1246647 | --- | --- | --- | 2,14 | up   |
| 6134776 | 7230886 | 1449525 | --- | --- | --- | 1,07 | down |
| 6134878 | 7286807 | 1588783 | --- | --- | --- | 1,41 | down |
| 6134882 | 7149817 | 1250310 | --- | --- | --- | 1,29 | down |
| 6134902 | 7268375 | 1543445 | --- | --- | --- | 1,60 | up   |
| 6134920 | 7342959 | 1727335 | --- | --- | --- | 1,08 | down |
| 6135006 | 7058713 | 1028664 | --- | --- | --- | 1,01 | down |
| 6135087 | 7243253 | 1481225 | --- | --- | --- | 1,14 | down |
| 6135155 | 7319937 | 1672264 | --- | --- | --- | 1,00 | down |
| 6135251 | 7331434 | 1699211 | --- | --- | --- | 1,00 | up   |
| 6135350 | 7095262 | 1115634 | --- | --- | --- | 1,08 | up   |
| 6135358 | 7259923 | 1522532 | --- | --- | --- | 1,05 | up   |
| 6135471 | 7093936 | 1112479 | --- | --- | --- | 1,51 | down |
| 6135477 | 7098126 | 1122973 | --- | --- | --- | 1,18 | down |
| 6135495 | 7338807 | 1716789 | --- | --- | --- | 1,18 | up   |
| 6135554 | 7279568 | 1572006 | --- | --- | --- | 1,15 | down |
| 6135666 | 7315206 | 1660011 | --- | --- | --- | 2,28 | up   |
| 6135782 | 7060851 | 1033356 | --- | --- | --- | 1,17 | up   |
| 6135815 | 7112566 | 1158625 | --- | --- | --- | 1,10 | up   |
| 6136208 | 7112225 | 1157645 | --- | --- | --- | 1,15 | down |
| 6136303 | 7209927 | 1398923 | --- | --- | --- | 1,06 | down |
| 6136330 | 7168858 | 1296844 | --- | --- | --- | 1,03 | down |
| 6136384 | 7179914 | 1324718 | --- | --- | --- | 1,08 | down |
| 6136428 | 7210387 | 1400042 | --- | --- | --- | 1,24 | down |
| 6136440 | 7065265 | 1044573 | --- | --- | --- | 1,06 | up   |
| 6136451 | 7166439 | 1290099 | --- | --- | --- | 4,32 | up   |
| 6136556 | 7211389 | 1402112 | --- | --- | --- | 1,07 | up   |
| 6136561 | 7333462 | 1703640 | --- | --- | --- | 1,24 | down |
| 6136603 | 7031774 | 964723  | --- | --- | --- | 1,08 | down |
| 6136626 | 7287222 | 1589726 | --- | --- | --- | 1,12 | down |
| 6136695 | 7316452 | 1663565 | --- | --- | --- | 1,15 | up   |
| 6136743 | 7243647 | 1482483 | --- | --- | --- | 1,02 | down |
| 6136776 | 7231589 | 1451696 | --- | --- | --- | 1,11 | down |
| 6136829 | 7112566 | 1158630 | --- | --- | --- | 1,31 | up   |
| 6136858 | 7327169 | 1688466 | --- | --- | --- | 1,14 | down |
| 6136863 | 7127540 | 1195276 | --- | --- | --- | 1,05 | down |
| 6136930 | 7352044 | 1750006 | --- | --- | --- | 1,20 | up   |
| 6136991 | 7210600 | 1400519 | --- | --- | --- | 1,02 | down |
| 6137035 | 7245921 | 1487689 | --- | --- | --- | 1,52 | down |
| 6137129 | 7297589 | 1615662 | --- | --- | --- | 1,04 | down |
| 6137188 | 7031774 | 964706  | --- | --- | --- | 1,63 | up   |
| 6137268 | 7086044 | 1092909 | --- | --- | --- | 2,41 | down |
| 6137279 | 7344406 | 1731203 | --- | --- | --- | 1,25 | up   |
| 6137290 | 7286807 | 1588815 | --- | --- | --- | 1,30 | down |
| 6137398 | 7234407 | 1459364 | --- | --- | --- | 2,11 | up   |
| 6137402 | 7258520 | 1518876 | --- | --- | --- | 1,43 | down |
| 6137433 | 7215394 | 1411254 | --- | --- | --- | 1,02 | up   |
| 6137483 | 7360325 | 1770490 | --- | --- | --- | 1,33 | up   |
| 6137574 | 7072765 | 1062743 | --- | --- | --- | 1,20 | up   |
| 6137620 | 7243603 | 1482279 | --- | --- | --- | 1,19 | up   |
| 6137632 | 7350993 | 1747503 | --- | --- | --- | 1,45 | up   |
| 6137725 | 7258670 | 1519357 | --- | --- | --- | 1,21 | down |

|         |         |         |     |     |     |      |      |
|---------|---------|---------|-----|-----|-----|------|------|
| 6137762 | 7068259 | 1051597 | --- | --- | --- | 1,34 | up   |
| 6137773 | 7180243 | 1325502 | --- | --- | --- | 1,15 | down |
| 6137828 | 7249737 | 1496747 | --- | --- | --- | 1,22 | up   |
| 6137920 | 7111427 | 1155764 | --- | --- | --- | 1,36 | down |
| 6138146 | 7299512 | 1620553 | --- | --- | --- | 1,04 | up   |
| 6138194 | 7038530 | 981884  | --- | --- | --- | 1,12 | up   |
| 6138228 | 7376820 | 1813392 | --- | --- | --- | 1,01 | up   |
| 6138249 | 7211389 | 1402114 | --- | --- | --- | 1,31 | up   |
| 6138264 | 7362184 | 1774820 | --- | --- | --- | 1,17 | up   |
| 6138353 | 7162144 | 1280495 | --- | --- | --- | 1,11 | up   |
| 6138505 | 7190534 | 1351226 | --- | --- | --- | 1,02 | up   |
| 6138565 | 7277719 | 1567080 | --- | --- | --- | 1,03 | up   |
| 6138651 | 7025681 | 950466  | --- | --- | --- | 1,10 | up   |
| 6138734 | 7364346 | 1779965 | --- | --- | --- | 1,03 | down |
| 6138752 | 7239752 | 1473185 | --- | --- | --- | 1,12 | up   |
| 6138820 | 7339379 | 1718337 | --- | --- | --- | 1,05 | up   |
| 6138887 | 7087965 | 1098026 | --- | --- | --- | 1,46 | up   |
| 6138896 | 7033337 | 969494  | --- | --- | --- | 1,32 | up   |
| 6138914 | 7129848 | 1200870 | --- | --- | --- | 1,07 | down |
| 6139063 | 7340304 | 1720851 | --- | --- | --- | 1,23 | down |
| 6139244 | 7162144 | 1280510 | --- | --- | --- | 1,05 | down |
| 6139518 | 7311218 | 1650339 | --- | --- | --- | 2,10 | up   |
| 6139624 | 7068259 | 1051611 | --- | --- | --- | 2,27 | down |
| 6139669 | 7359551 | 1768639 | --- | --- | --- | 1,05 | down |
| 6139718 | 7357103 | 1762391 | --- | --- | --- | 1,02 | up   |
| 6139806 | 7297589 | 1615600 | --- | --- | --- | 1,34 | up   |
| 6139874 | 7236254 | 1464063 | --- | --- | --- | 1,18 | down |
| 6139914 | 7172988 | 1307315 | --- | --- | --- | 1,21 | up   |
| 6139946 | 7078666 | 1076526 | --- | --- | --- | 1,17 | down |
| 6139995 | 7210713 | 1400753 | --- | --- | --- | 1,47 | up   |
| 6139998 | 7323545 | 1679946 | --- | --- | --- | 1,04 | up   |
| 6140167 | 7360325 | 1770559 | --- | --- | --- | 1,06 | down |
| 6140188 | 7294151 | 1606609 | --- | --- | --- | 1,13 | down |
| 6140202 | 7113483 | 1161018 | --- | --- | --- | 1,25 | down |
| 6140241 | 7380497 | 1821865 | --- | --- | --- | 1,01 | up   |
| 6140280 | 7276231 | 1563106 | --- | --- | --- | 1,15 | down |
| 6140295 | 7068259 | 1051630 | --- | --- | --- | 1,68 | up   |
| 6140329 | 7067670 | 1050303 | --- | --- | --- | 1,77 | up   |
| 6140396 | 7373906 | 1806373 | --- | --- | --- | 1,02 | up   |
| 6140451 | 7033337 | 969483  | --- | --- | --- | 1,33 | down |
| 6140581 | 7255120 | 1510371 | --- | --- | --- | 1,26 | up   |
| 6140587 | 7225553 | 1435984 | --- | --- | --- | 1,23 | up   |
| 6140614 | 7070616 | 1057796 | --- | --- | --- | 1,11 | down |
| 6140647 | 7303616 | 1631350 | --- | --- | --- | 1,03 | down |
| 6140658 | 7264808 | 1534469 | --- | --- | --- | 1,14 | down |
| 6140774 | 7131360 | 1204988 | --- | --- | --- | 1,11 | up   |
| 6140942 | 7350237 | 1745494 | --- | --- | --- | 1,04 | down |
| 6140976 | 7378997 | 1818677 | --- | --- | --- | 1,14 | up   |
| 6140977 | 7031774 | 964778  | --- | --- | --- | 1,71 | down |
| 6140995 | 7307721 | 1641998 | --- | --- | --- | 1,06 | up   |
| 6141012 | 7358859 | 1767016 | --- | --- | --- | 1,00 | down |
| 6141027 | 7240569 | 1475508 | --- | --- | --- | 1,01 | up   |
| 6141109 | 7088164 | 1098474 | --- | --- | --- | 1,67 | down |
| 6141169 | 7217747 | 1417502 | --- | --- | --- | 1,13 | down |
| 6141174 | 7115708 | 1166472 | --- | --- | --- | 1,12 | down |
| 6141241 | 7256191 | 1512880 | --- | --- | --- | 1,11 | down |

|         |         |         |     |     |     |      |      |
|---------|---------|---------|-----|-----|-----|------|------|
| 6141329 | 7380497 | 1821857 | --- | --- | --- | 1,00 | up   |
| 6141362 | 7266532 | 1538296 | --- | --- | --- | 1,10 | down |
| 6141383 | 7331297 | 1698810 | --- | --- | --- | 1,22 | down |
| 6141388 | 7243647 | 1482467 | --- | --- | --- | 1,07 | up   |
| 6141433 | 7231958 | 1452576 | --- | --- | --- | 1,60 | up   |
| 6141576 | 7060851 | 1033437 | --- | --- | --- | 1,18 | down |
| 6141761 | 7073950 | 1065922 | --- | --- | --- | 1,06 | down |
| 6141817 | 7097525 | 1121057 | --- | --- | --- | 1,26 | up   |
| 6141849 | 7193513 | 1359467 | --- | --- | --- | 1,22 | up   |
| 6141887 | 7258520 | 1518881 | --- | --- | --- | 1,22 | down |
| 6141982 | 7056333 | 1023681 | --- | --- | --- | 1,11 | down |
| 6142191 | 7380497 | 1821832 | --- | --- | --- | 1,01 | up   |
| 6142248 | 7052813 | 1015907 | --- | --- | --- | 1,12 | up   |
| 6142313 | 7336250 | 1710172 | --- | --- | --- | 1,51 | down |
| 6142372 | 7167883 | 1294108 | --- | --- | --- | 1,07 | down |
| 6142425 | 7143240 | 1234179 | --- | --- | --- | 1,13 | up   |
| 6142469 | 7245921 | 1487691 | --- | --- | --- | 2,66 | down |
| 6142565 | 7238115 | 1468559 | --- | --- | --- | 1,10 | up   |
| 6142569 | 7067670 | 1050320 | --- | --- | --- | 1,66 | up   |
| 6142580 | 7231203 | 1450421 | --- | --- | --- | 1,15 | down |
| 6142617 | 7029770 | 960147  | --- | --- | --- | 1,20 | down |
| 6142637 | 7339387 | 1718382 | --- | --- | --- | 1,52 | up   |
| 6142683 | 7054958 | 1020581 | --- | --- | --- | 2,95 | down |
| 6142832 | 7301895 | 1626716 | --- | --- | --- | 1,47 | down |
| 6142849 | 7314270 | 1657742 | --- | --- | --- | 1,24 | up   |
| 6142916 | 7099517 | 1126486 | --- | --- | --- | 1,04 | down |
| 6142980 | 7229886 | 1447166 | --- | --- | --- | 1,01 | down |
| 6142987 | 7217269 | 1415914 | --- | --- | --- | 1,26 | up   |
| 6143065 | 7362184 | 1774845 | --- | --- | --- | 1,08 | up   |
| 6143092 | 7199476 | 1374546 | --- | --- | --- | 1,11 | down |
| 6143286 | 7127691 | 1195629 | --- | --- | --- | 1,14 | up   |
| 6143445 | 7062436 | 1037701 | --- | --- | --- | 1,98 | down |
| 6143522 | 7358859 | 1766960 | --- | --- | --- | 1,42 | down |
| 6143569 | 7340990 | 1722504 | --- | --- | --- | 1,13 | up   |
| 6143584 | 7213908 | 1407673 | --- | --- | --- | 1,00 | up   |
| 6143640 | 7097680 | 1121739 | --- | --- | --- | 1,05 | up   |
| 6143642 | 7322388 | 1677328 | --- | --- | --- | 1,34 | down |
| 6143814 | 7180721 | 1326701 | --- | --- | --- | 1,11 | down |
| 6143847 | 7040260 | 986064  | --- | --- | --- | 1,38 | up   |
| 6143937 | 7115708 | 1166475 | --- | --- | --- | 1,05 | down |
| 6143943 | 7073673 | 1065088 | --- | --- | --- | 1,34 | up   |
| 6143997 | 7193644 | 1359708 | --- | --- | --- | 1,34 | up   |
| 6144080 | 7198210 | 1371005 | --- | --- | --- | 1,04 | up   |
| 6144081 | 7198644 | 1372295 | --- | --- | --- | 1,09 | down |
| 6144100 | 7384904 | 1831594 | --- | --- | --- | 1,02 | down |
| 6144310 | 7243647 | 1482453 | --- | --- | --- | 1,58 | up   |
| 6144358 | 7049399 | 1008341 | --- | --- | --- | 1,37 | down |
| 6144424 | 7167876 | 1294049 | --- | --- | --- | 1,13 | up   |
| 6144622 | 7034293 | 971976  | --- | --- | --- | 1,10 | down |
| 6144771 | 7139026 | 1223490 | --- | --- | --- | 1,14 | down |
| 6144779 | 7346066 | 1735324 | --- | --- | --- | 1,03 | down |
| 6144846 | 7174149 | 1310515 | --- | --- | --- | 1,27 | down |
| 6144952 | 7263152 | 1530387 | --- | --- | --- | 1,08 | up   |
| 6144984 | 7369031 | 1793013 | --- | --- | --- | 1,14 | down |
| 6144995 | 7297589 | 1615666 | --- | --- | --- | 1,46 | down |
| 6145244 | 7274892 | 1559579 | --- | --- | --- | 1,37 | down |

|         |         |         |     |     |     |      |      |
|---------|---------|---------|-----|-----|-----|------|------|
| 6145344 | 7186464 | 1341356 | --- | --- | --- | 1,06 | down |
| 6145368 | 7338807 | 1716799 | --- | --- | --- | 1,26 | down |
| 6145506 | 7376820 | 1813453 | --- | --- | --- | 1,37 | up   |
| 6145544 | 7108551 | 1148695 | --- | --- | --- | 1,31 | down |
| 6145632 | 7094139 | 1112907 | --- | --- | --- | 1,03 | down |
| 6145764 | 7097454 | 1120885 | --- | --- | --- | 1,28 | down |
| 6145814 | 7286807 | 1588802 | --- | --- | --- | 1,19 | down |
| 6145960 | 7098810 | 1124657 | --- | --- | --- | 1,10 | down |
| 6145979 | 7071969 | 1060903 | --- | --- | --- | 1,50 | down |
| 6146085 | 7143455 | 1234730 | --- | --- | --- | 1,38 | up   |
| 6146086 | 7068259 | 1051633 | --- | --- | --- | 1,32 | down |
| 6146168 | 7313411 | 1655432 | --- | --- | --- | 1,11 | up   |
| 6146172 | 7231152 | 1450263 | --- | --- | --- | 2,01 | up   |
| 6146178 | 7156052 | 1265753 | --- | --- | --- | 1,37 | down |
| 6146187 | 7293757 | 1605686 | --- | --- | --- | 1,36 | down |
| 6146323 | 7149817 | 1250316 | --- | --- | --- | 1,00 | up   |
| 6146349 | 7168858 | 1296821 | --- | --- | --- | 1,04 | up   |
| 6146426 | 7337845 | 1714347 | --- | --- | --- | 1,65 | down |
| 6146431 | 7289382 | 1595211 | --- | --- | --- | 1,19 | down |
| 6146443 | 7240569 | 1475314 | --- | --- | --- | 1,05 | up   |
| 6146466 | 7274780 | 1559210 | --- | --- | --- | 1,62 | down |
| 6146483 | 7062436 | 1037671 | --- | --- | --- | 1,28 | down |
| 6146601 | 7370475 | 1797133 | --- | --- | --- | 4,03 | down |
| 6146605 | 7182056 | 1330579 | --- | --- | --- | 1,01 | down |
| 6146679 | 7116614 | 1168796 | --- | --- | --- | 1,56 | up   |
| 6146779 | 7120235 | 1177953 | --- | --- | --- | 1,06 | up   |
| 6146816 | 7034756 | 973234  | --- | --- | --- | 1,31 | down |
| 6146818 | 7169732 | 1298701 | --- | --- | --- | 1,07 | up   |
| 6146976 | 7337224 | 1712618 | --- | --- | --- | 1,11 | up   |
| 6146997 | 7336931 | 1711861 | --- | --- | --- | 1,47 | up   |
| 6147374 | 7370412 | 1796836 | --- | --- | --- | 1,30 | up   |
| 6147429 | 7210263 | 1399744 | --- | --- | --- | 1,39 | up   |
| 6147459 | 7156052 | 1265755 | --- | --- | --- | 1,28 | down |
| 6147604 | 7341646 | 1724194 | --- | --- | --- | 1,05 | down |
| 6147623 | 7050557 | 1010791 | --- | --- | --- | 1,05 | up   |
| 6147643 | 7186464 | 1341367 | --- | --- | --- | 1,14 | up   |
| 6147645 | 7092549 | 1109170 | --- | --- | --- | 1,03 | up   |
| 6147702 | 7149817 | 1250317 | --- | --- | --- | 2,02 | down |
| 6147868 | 7040260 | 986039  | --- | --- | --- | 1,09 | down |
| 6147872 | 7027759 | 956130  | --- | --- | --- | 1,78 | up   |
| 6147923 | 7374842 | 1808999 | --- | --- | --- | 1,23 | up   |
| 6147989 | 7042382 | 991293  | --- | --- | --- | 1,03 | up   |
| 6148208 | 7360486 | 1770978 | --- | --- | --- | 1,29 | up   |
| 6148226 | 7064134 | 1041447 | --- | --- | --- | 1,24 | down |
| 6148238 | 7119930 | 1177225 | --- | --- | --- | 1,23 | down |
| 6148257 | 7041609 | 989586  | --- | --- | --- | 1,07 | down |
| 6148395 | 7031576 | 964108  | --- | --- | --- | 1,26 | up   |
| 6148399 | 7243653 | 1482521 | --- | --- | --- | 1,35 | up   |
| 6148402 | 7263652 | 1531627 | --- | --- | --- | 1,00 | down |
| 6148407 | 7092965 | 1110171 | --- | --- | --- | 1,07 | up   |
| 6148777 | 7072765 | 1062736 | --- | --- | --- | 1,03 | up   |
| 6148894 | 7132125 | 1206630 | --- | --- | --- | 1,15 | up   |
| 6148917 | 7248964 | 1494948 | --- | --- | --- | 2,01 | down |
| 6148934 | 7102976 | 1135051 | --- | --- | --- | 1,10 | down |
| 6149037 | 7108345 | 1148085 | --- | --- | --- | 1,30 | up   |
| 6149187 | 7294151 | 1606618 | --- | --- | --- | 1,14 | down |



|         |         |         |     |     |     |      |      |
|---------|---------|---------|-----|-----|-----|------|------|
| 6149229 | 7319259 | 1670394 | --- | --- | --- | 1,35 | up   |
| 6149287 | 7211389 | 1402118 | --- | --- | --- | 1,48 | up   |
| 6149459 | 7118356 | 1173130 | --- | --- | --- | 1,35 | down |
| 6149488 | 7072754 | 1062663 | --- | --- | --- | 1,10 | down |
| 6149545 | 7264085 | 1532720 | --- | --- | --- | 1,06 | up   |
| 6149868 | 7191983 | 1355153 | --- | --- | --- | 1,38 | up   |
| 6150002 | 7368004 | 1789333 | --- | --- | --- | 1,80 | down |
| 6150065 | 7258520 | 1518887 | --- | --- | --- | 1,05 | down |
| 6150297 | 7108345 | 1148071 | --- | --- | --- | 1,11 | up   |
| 6150377 | 7069830 | 1055592 | --- | --- | --- | 1,08 | up   |
| 6150378 | 7083031 | 1086290 | --- | --- | --- | 1,07 | down |
| 6150505 | 7099156 | 1125633 | --- | --- | --- | 1,64 | down |
| 6150564 | 7311218 | 1650337 | --- | --- | --- | 1,03 | down |
| 6150584 | 7211363 | 1402047 | --- | --- | --- | 1,07 | down |
| 6150631 | 7060195 | 1031960 | --- | --- | --- | 1,27 | down |
| 6150713 | 7247228 | 1490530 | --- | --- | --- | 1,13 | up   |
| 6150811 | 7086966 | 1095287 | --- | --- | --- | 2,22 | up   |
| 6150827 | 7319144 | 1670100 | --- | --- | --- | 1,15 | up   |
| 6150847 | 7182056 | 1330579 | --- | --- | --- | 1,05 | down |
| 6150883 | 7188681 | 1346294 | --- | --- | --- | 1,17 | down |
| 6150885 | 7144389 | 1236778 | --- | --- | --- | 1,15 | up   |
| 6150896 | 7350237 | 1745493 | --- | --- | --- | 1,09 | up   |
| 6150898 | 7081667 | 1083099 | --- | --- | --- | 1,04 | up   |
| 6150908 | 7217650 | 1417171 | --- | --- | --- | 1,33 | up   |
| 6150930 | 7287222 | 1589731 | --- | --- | --- | 1,50 | down |
| 6151097 | 7248790 | 1494508 | --- | --- | --- | 1,04 | down |
| 6151263 | 7280743 | 1574556 | --- | --- | --- | 1,05 | up   |
| 6151323 | 7218728 | 1419927 | --- | --- | --- | 1,27 | up   |
| 6151370 | 7181169 | 1328103 | --- | --- | --- | 1,10 | up   |
| 6151376 | 7319937 | 1672267 | --- | --- | --- | 1,42 | up   |
| 6151422 | 7060851 | 1033409 | --- | --- | --- | 1,06 | up   |
| 6151521 | 7247229 | 1490550 | --- | --- | --- | 1,03 | down |
| 6151596 | 7145669 | 1240009 | --- | --- | --- | 1,05 | up   |
| 6151599 | 7115708 | 1166476 | --- | --- | --- | 1,27 | down |
| 6151663 | 7237992 | 1468288 | --- | --- | --- | 1,40 | up   |
| 6151669 | 7071681 | 1060284 | --- | --- | --- | 1,16 | up   |
| 6151714 | 7336931 | 1711870 | --- | --- | --- | 1,04 | down |
| 6151766 | 7086044 | 1092936 | --- | --- | --- | 1,58 | down |
| 6151776 | 7190844 | 1352139 | --- | --- | --- | 1,06 | up   |
| 6151870 | 7248964 | 1494946 | --- | --- | --- | 1,13 | up   |
| 6151956 | 7349946 | 1744948 | --- | --- | --- | 1,12 | up   |
| 6152188 | 7365183 | 1781918 | --- | --- | --- | 2,04 | down |
| 6152212 | 7370446 | 1797009 | --- | --- | --- | 1,28 | down |
| 6152315 | 7380019 | 1820809 | --- | --- | --- | 1,17 | down |
| 6152362 | 7112225 | 1157589 | --- | --- | --- | 1,02 | up   |
| 6152425 | 7255120 | 1510375 | --- | --- | --- | 1,20 | up   |
| 6152441 | 7167507 | 1293116 | --- | --- | --- | 1,45 | up   |
| 6152658 | 7034756 | 973229  | --- | --- | --- | 1,11 | down |
| 6152761 | 7049399 | 1008382 | --- | --- | --- | 1,17 | down |
| 6152775 | 7154655 | 1262334 | --- | --- | --- | 1,36 | up   |
| 6152867 | 7340990 | 1722503 | --- | --- | --- | 1,22 | up   |
| 6152899 | 7331413 | 1699139 | --- | --- | --- | 1,14 | down |
| 6153365 | 7133612 | 1210199 | --- | --- | --- | 1,04 | down |
| 6153689 | 7189184 | 1347604 | --- | --- | --- | 1,16 | down |
| 6153994 | 7078273 | 1075822 | --- | --- | --- | 1,40 | up   |
| 6154264 | 7216676 | 1414429 | --- | --- | --- | 2,32 | down |

|         |         |         |     |     |     |      |      |
|---------|---------|---------|-----|-----|-----|------|------|
| 6154341 | 7356115 | 1760135 | --- | --- | --- | 1,46 | down |
| 6154350 | 7279568 | 1572011 | --- | --- | --- | 1,10 | down |
| 6154417 | 7188822 | 1346632 | --- | --- | --- | 1,02 | up   |
| 6154484 | 7338807 | 1716791 | --- | --- | --- | 1,42 | up   |
| 6154515 | 7337224 | 1712622 | --- | --- | --- | 1,03 | down |
| 6154598 | 7364346 | 1780043 | --- | --- | --- | 1,23 | down |
| 6154765 | 7359551 | 1768623 | --- | --- | --- | 1,53 | up   |
| 6154789 | 7233440 | 1456841 | --- | --- | --- | 1,07 | down |
| 6154895 | 7258670 | 1519356 | --- | --- | --- | 1,40 | down |
| 6154901 | 7123421 | 1185842 | --- | --- | --- | 1,28 | up   |
| 6154957 | 7162144 | 1280517 | --- | --- | --- | 1,85 | up   |
| 6155051 | 7112566 | 1158635 | --- | --- | --- | 1,10 | down |
| 6155055 | 7031618 | 964199  | --- | --- | --- | 1,13 | down |
| 6155083 | 7314270 | 1657741 | --- | --- | --- | 1,54 | down |
| 6155148 | 7330238 | 1695954 | --- | --- | --- | 1,65 | up   |
| 6155169 | 7088164 | 1098492 | --- | --- | --- | 2,14 | up   |
| 6155185 | 7232340 | 1453518 | --- | --- | --- | 1,05 | down |
| 6155310 | 7112225 | 1157606 | --- | --- | --- | 1,09 | down |
| 6155396 | 7117526 | 1171034 | --- | --- | --- | 1,05 | down |
| 6155437 | 7112225 | 1157558 | --- | --- | --- | 1,10 | down |
| 6155447 | 7232340 | 1453524 | --- | --- | --- | 1,04 | down |
| 6155501 | 7033337 | 969501  | --- | --- | --- | 1,42 | down |
| 6155790 | 7323545 | 1679952 | --- | --- | --- | 1,48 | down |
| 6155819 | 7050726 | 1011251 | --- | --- | --- | 1,25 | up   |
| 6155823 | 7180861 | 1327214 | --- | --- | --- | 1,02 | down |
| 6155840 | 7373633 | 1805705 | --- | --- | --- | 1,11 | down |
| 6155889 | 7032444 | 966752  | --- | --- | --- | 1,02 | up   |
| 6155915 | 7202550 | 1381608 | --- | --- | --- | 1,12 | up   |
| 6155982 | 7107066 | 1144773 | --- | --- | --- | 1,18 | up   |
| 6156006 | 7209927 | 1398924 | --- | --- | --- | 1,55 | up   |
| 6156086 | 7303616 | 1631320 | --- | --- | --- | 1,34 | up   |
| 6156183 | 7203872 | 1384787 | --- | --- | --- | 1,01 | up   |
| 6156370 | 7312250 | 1652642 | --- | --- | --- | 1,82 | down |
| 6156412 | 7067089 | 1048925 | --- | --- | --- | 1,31 | up   |
| 6156431 | 7303616 | 1631333 | --- | --- | --- | 1,35 | down |
| 6156462 | 7225553 | 1435981 | --- | --- | --- | 1,02 | down |
| 6156523 | 7236395 | 1464324 | --- | --- | --- | 1,07 | down |
| 6156528 | 7060851 | 1033357 | --- | --- | --- | 1,03 | up   |
| 6156538 | 7147416 | 1244434 | --- | --- | --- | 1,13 | down |
| 6156624 | 7249503 | 1496205 | --- | --- | --- | 1,07 | down |
| 6156741 | 7162177 | 1280576 | --- | --- | --- | 1,31 | up   |
| 6156751 | 7108974 | 1149800 | --- | --- | --- | 1,16 | down |
| 6156758 | 7316644 | 1664051 | --- | --- | --- | 1,10 | up   |
| 6156765 | 7243130 | 1480872 | --- | --- | --- | 1,10 | down |
| 6156777 | 7065266 | 1044589 | --- | --- | --- | 1,50 | down |
| 6156799 | 7180861 | 1327211 | --- | --- | --- | 1,72 | down |
| 6156882 | 7032204 | 966175  | --- | --- | --- | 1,37 | up   |
| 6156894 | 7068259 | 1051621 | --- | --- | --- | 1,19 | down |
| 6156914 | 7155286 | 1263839 | --- | --- | --- | 1,92 | up   |
| 6156938 | 7111573 | 1156015 | --- | --- | --- | 1,04 | up   |
| 6156966 | 7228530 | 1443902 | --- | --- | --- | 1,19 | up   |
| 6157008 | 7261019 | 1525281 | --- | --- | --- | 1,85 | down |
| 6157034 | 7294151 | 1606605 | --- | --- | --- | 1,01 | up   |
| 6157039 | 7303616 | 1631395 | --- | --- | --- | 2,33 | down |
| 6157189 | 7088489 | 1099523 | --- | --- | --- | 1,02 | down |
| 6157205 | 7131119 | 1204442 | --- | --- | --- | 1,99 | down |

|         |         |         |     |     |     |      |      |
|---------|---------|---------|-----|-----|-----|------|------|
| 6157360 | 7244378 | 1484399 | --- | --- | --- | 1,08 | down |
| 6157374 | 7053874 | 1018327 | --- | --- | --- | 1,02 | up   |
| 6157430 | 7319937 | 1672293 | --- | --- | --- | 1,24 | down |
| 6157549 | 7287222 | 1589714 | --- | --- | --- | 1,85 | down |
| 6157598 | 7367971 | 1789121 | --- | --- | --- | 1,16 | up   |
| 6157613 | 7339110 | 1717604 | --- | --- | --- | 1,03 | up   |
| 6157663 | 7032083 | 965682  | --- | --- | --- | 1,15 | down |
| 6157752 | 7072225 | 1061405 | --- | --- | --- | 1,09 | up   |
| 6157793 | 7361420 | 1773049 | --- | --- | --- | 1,16 | down |
| 6157900 | 7344702 | 1732142 | --- | --- | --- | 1,75 | up   |
| 6157937 | 7330737 | 1697215 | --- | --- | --- | 1,34 | up   |
| 6157945 | 7358623 | 1766242 | --- | --- | --- | 1,01 | up   |
| 6158042 | 7279586 | 1572077 | --- | --- | --- | 1,15 | up   |
| 6158159 | 7307485 | 1641331 | --- | --- | --- | 2,06 | down |
| 6158193 | 7041609 | 989553  | --- | --- | --- | 1,25 | down |
| 6158273 | 7210263 | 1399766 | --- | --- | --- | 1,12 | up   |
| 6158360 | 7342356 | 1725875 | --- | --- | --- | 1,58 | down |
| 6158392 | 7276231 | 1563115 | --- | --- | --- | 1,12 | down |
| 6158520 | 7349817 | 1744588 | --- | --- | --- | 1,33 | down |
| 6158640 | 7349817 | 1744596 | --- | --- | --- | 1,03 | down |
| 6158716 | 7231775 | 1452126 | --- | --- | --- | 1,01 | down |
| 6158740 | 7329558 | 1694420 | --- | --- | --- | 1,07 | up   |
| 6158767 | 7029770 | 960152  | --- | --- | --- | 1,02 | down |
| 6158888 | 7069253 | 1054160 | --- | --- | --- | 1,40 | down |
| 6158905 | 7115362 | 1165599 | --- | --- | --- | 1,07 | up   |
| 6158910 | 7316644 | 1664050 | --- | --- | --- | 1,34 | up   |
| 6158917 | 7229886 | 1447144 | --- | --- | --- | 1,12 | down |
| 6159054 | 7244288 | 1484097 | --- | --- | --- | 1,09 | up   |
| 6159060 | 7097525 | 1121064 | --- | --- | --- | 1,42 | up   |
| 6159102 | 7249503 | 1496210 | --- | --- | --- | 1,15 | down |
| 6159104 | 7367971 | 1789131 | --- | --- | --- | 1,19 | up   |
| 6159171 | 7285061 | 1585156 | --- | --- | --- | 1,40 | down |
| 6159295 | 7098867 | 1124961 | --- | --- | --- | 1,22 | down |
| 6159499 | 7226241 | 1437770 | --- | --- | --- | 1,04 | down |
| 6159514 | 7292517 | 1602555 | --- | --- | --- | 1,18 | up   |
| 6159614 | 7316644 | 1664038 | --- | --- | --- | 1,18 | down |
| 6159649 | 7253408 | 1505943 | --- | --- | --- | 1,19 | up   |
| 6159757 | 7247976 | 1492461 | --- | --- | --- | 1,15 | down |
| 6159796 | 7059766 | 1030972 | --- | --- | --- | 1,24 | up   |
| 6159813 | 7038316 | 981456  | --- | --- | --- | 1,00 | down |
| 6159918 | 7207069 | 1392033 | --- | --- | --- | 1,02 | up   |
| 6160022 | 7330078 | 1695471 | --- | --- | --- | 1,11 | down |
| 6160163 | 7358859 | 1766982 | --- | --- | --- | 1,12 | down |
| 6160168 | 7025652 | 950296  | --- | --- | --- | 1,40 | up   |
| 6160200 | 7076236 | 1071238 | --- | --- | --- | 1,04 | up   |
| 6160296 | 7198210 | 1370974 | --- | --- | --- | 1,04 | up   |
| 6160325 | 7322388 | 1677318 | --- | --- | --- | 1,04 | down |
| 6160387 | 7312942 | 1654174 | --- | --- | --- | 1,15 | down |
| 6160426 | 7225553 | 1435984 | --- | --- | --- | 1,14 | down |
| 6160478 | 7108300 | 1147916 | --- | --- | --- | 1,02 | down |
| 6160510 | 7099030 | 1125340 | --- | --- | --- | 1,19 | down |
| 6160559 | 7193644 | 1359716 | --- | --- | --- | 1,53 | up   |
| 6160574 | 7064134 | 1041466 | --- | --- | --- | 1,16 | down |
| 6160595 | 7378981 | 1818552 | --- | --- | --- | 1,20 | down |
| 6160667 | 7070616 | 1057781 | --- | --- | --- | 1,35 | down |
| 6160732 | 7095956 | 1117045 | --- | --- | --- | 1,03 | up   |

|         |         |         |     |     |     |      |      |
|---------|---------|---------|-----|-----|-----|------|------|
| 6160777 | 7280743 | 1574527 | --- | --- | --- | 1,14 | up   |
| 6160780 | 7258520 | 1518874 | --- | --- | --- | 1,41 | down |
| 6160821 | 7337224 | 1712622 | --- | --- | --- | 1,03 | up   |
| 6160916 | 7331719 | 1699916 | --- | --- | --- | 1,18 | up   |
| 6161127 | 7148978 | 1248459 | --- | --- | --- | 1,00 | up   |
| 6161142 | 7071714 | 1060350 | --- | --- | --- | 1,36 | down |
| 6161189 | 7363674 | 1778407 | --- | --- | --- | 1,72 | down |
| 6161216 | 7242490 | 1479428 | --- | --- | --- | 1,11 | down |
| 6161328 | 7276231 | 1563112 | --- | --- | --- | 1,39 | up   |
| 6161377 | 7168914 | 1297031 | --- | --- | --- | 1,03 | up   |
| 6161428 | 7067670 | 1050315 | --- | --- | --- | 1,46 | up   |
| 6161477 | 7331434 | 1699211 | --- | --- | --- | 1,02 | up   |
| 6161506 | 7369400 | 1793984 | --- | --- | --- | 1,37 | down |
| 6161573 | 7142416 | 1231814 | --- | --- | --- | 2,19 | up   |
| 6161584 | 7143455 | 1234737 | --- | --- | --- | 1,23 | down |
| 6161585 | 7234696 | 1460025 | --- | --- | --- | 1,06 | up   |
| 6161640 | 7070616 | 1057773 | --- | --- | --- | 1,16 | down |
| 6161862 | 7079600 | 1078635 | --- | --- | --- | 1,02 | down |
| 6162230 | 7340757 | 1721879 | --- | --- | --- | 1,02 | down |
| 6162319 | 7263152 | 1530361 | --- | --- | --- | 1,61 | up   |
| 6162326 | 7186443 | 1341267 | --- | --- | --- | 1,18 | down |
| 6162465 | 7258545 | 1518929 | --- | --- | --- | 1,42 | up   |
| 6162488 | 7199476 | 1374541 | --- | --- | --- | 1,03 | up   |
| 6162531 | 7083030 | 1086269 | --- | --- | --- | 1,02 | up   |
| 6162597 | 7197056 | 1367844 | --- | --- | --- | 1,50 | up   |
| 6162630 | 7067828 | 1050785 | --- | --- | --- | 1,02 | up   |
| 6162767 | 7376566 | 1812881 | --- | --- | --- | 1,15 | up   |
| 6162858 | 7235521 | 1462157 | --- | --- | --- | 1,03 | down |
| 6162884 | 7100257 | 1128232 | --- | --- | --- | 1,68 | up   |
| 6162998 | 7111573 | 1156018 | --- | --- | --- | 1,05 | up   |
| 6163033 | 7225213 | 1435122 | --- | --- | --- | 1,04 | up   |
| 6163059 | 7230886 | 1449533 | --- | --- | --- | 1,12 | down |
| 6163066 | 7319937 | 1672281 | --- | --- | --- | 1,01 | down |
| 6163206 | 7142081 | 1230984 | --- | --- | --- | 1,04 | up   |
| 6163288 | 7131360 | 1204990 | --- | --- | --- | 1,14 | down |
| 6163465 | 7034293 | 971865  | --- | --- | --- | 1,13 | down |
| 6163535 | 7055876 | 1022458 | --- | --- | --- | 1,40 | down |
| 6163576 | 7056333 | 1023680 | --- | --- | --- | 1,20 | down |
| 6163649 | 7030454 | 961552  | --- | --- | --- | 1,16 | down |
| 6163844 | 7263248 | 1530615 | --- | --- | --- | 1,57 | down |
| 6163887 | 7339379 | 1718357 | --- | --- | --- | 1,04 | up   |
| 6163901 | 7113083 | 1159979 | --- | --- | --- | 1,23 | up   |
| 6163938 | 7263152 | 1530378 | --- | --- | --- | 1,14 | down |
| 6164040 | 7279303 | 1571206 | --- | --- | --- | 1,49 | down |
| 6164197 | 7182056 | 1330579 | --- | --- | --- | 1,10 | up   |
| 6164257 | 7098411 | 1123703 | --- | --- | --- | 1,63 | up   |
| 6164519 | 7038969 | 982980  | --- | --- | --- | 1,22 | down |
| 6164544 | 7033504 | 969860  | --- | --- | --- | 1,10 | up   |
| 6164577 | 7214605 | 1409351 | --- | --- | --- | 1,18 | up   |
| 6164676 | 7257361 | 1516097 | --- | --- | --- | 1,03 | down |
| 6164685 | 7058813 | 1028892 | --- | --- | --- | 1,29 | down |
| 6164699 | 7216132 | 1413399 | --- | --- | --- | 1,09 | up   |
| 6164740 | 7344530 | 1731559 | --- | --- | --- | 1,08 | up   |
| 6164809 | 7122486 | 1183425 | --- | --- | --- | 1,40 | up   |
| 6164848 | 7208330 | 1395091 | --- | --- | --- | 1,12 | down |
| 6164881 | 7281507 | 1576715 | --- | --- | --- | 1,73 | down |

|         |         |         |     |     |     |      |      |
|---------|---------|---------|-----|-----|-----|------|------|
| 6164926 | 7273251 | 1555953 | --- | --- | --- | 1,30 | down |
| 6165047 | 7190844 | 1352145 | --- | --- | --- | 1,15 | down |
| 6165062 | 7180861 | 1327185 | --- | --- | --- | 1,04 | down |
| 6165122 | 7036412 | 976870  | --- | --- | --- | 1,23 | down |
| 6165153 | 7233359 | 1456507 | --- | --- | --- | 1,00 | up   |
| 6165160 | 7073928 | 1065780 | --- | --- | --- | 1,64 | up   |
| 6165183 | 7320234 | 1673006 | --- | --- | --- | 1,50 | up   |
| 6165192 | 7344406 | 1731225 | --- | --- | --- | 1,50 | down |
| 6165197 | 7037764 | 980063  | --- | --- | --- | 1,01 | up   |
| 6165207 | 7240569 | 1475381 | --- | --- | --- | 1,00 | up   |
| 6165276 | 7330238 | 1695947 | --- | --- | --- | 1,06 | down |
| 6165502 | 7162144 | 1280499 | --- | --- | --- | 1,02 | up   |
| 6165542 | 7069142 | 1053878 | --- | --- | --- | 1,09 | up   |
| 6165565 | 7098451 | 1123818 | --- | --- | --- | 1,14 | up   |
| 6165577 | 7143455 | 1234720 | --- | --- | --- | 1,20 | up   |
| 6165613 | 7070869 | 1058491 | --- | --- | --- | 1,05 | up   |
| 6165641 | 7339110 | 1717617 | --- | --- | --- | 1,02 | up   |
| 6165668 | 7264797 | 1534422 | --- | --- | --- | 1,11 | down |
| 6165696 | 7097485 | 1120939 | --- | --- | --- | 1,28 | up   |
| 6165915 | 7364346 | 1780014 | --- | --- | --- | 1,17 | up   |
| 6165949 | 7213945 | 1407833 | --- | --- | --- | 1,11 | up   |
| 6165968 | 7244378 | 1484409 | --- | --- | --- | 1,42 | down |
| 6166326 | 7174149 | 1310485 | --- | --- | --- | 1,30 | down |
| 6166444 | 7198210 | 1371008 | --- | --- | --- | 1,43 | down |
| 6166518 | 7092549 | 1109152 | --- | --- | --- | 1,03 | down |
| 6166557 | 7143904 | 1235816 | --- | --- | --- | 1,03 | up   |
| 6166801 | 7337224 | 1712603 | --- | --- | --- | 1,93 | down |
| 6166848 | 7367946 | 1788962 | --- | --- | --- | 1,34 | down |
| 6166887 | 7112225 | 1157545 | --- | --- | --- | 1,17 | down |
| 6166943 | 7258784 | 1519673 | --- | --- | --- | 1,95 | up   |
| 6166999 | 7061550 | 1035280 | --- | --- | --- | 1,12 | down |
| 6167051 | 7231835 | 1452287 | --- | --- | --- | 1,42 | down |
| 6167162 | 7217679 | 1417293 | --- | --- | --- | 1,25 | up   |
| 6167187 | 7253453 | 1506152 | --- | --- | --- | 1,18 | down |
| 6167207 | 7243253 | 1481226 | --- | --- | --- | 1,56 | up   |
| 6167329 | 7330396 | 1696377 | --- | --- | --- | 1,13 | down |
| 6167385 | 7050655 | 1011011 | --- | --- | --- | 1,60 | down |
| 6167426 | 7065265 | 1044571 | --- | --- | --- | 1,10 | down |
| 6167490 | 7300446 | 1622879 | --- | --- | --- | 1,45 | up   |
| 6167507 | 7293234 | 1604337 | --- | --- | --- | 1,01 | up   |
| 6167623 | 7041609 | 989591  | --- | --- | --- | 1,17 | down |
| 6167696 | 7069253 | 1054149 | --- | --- | --- | 1,48 | down |
| 6167711 | 7245066 | 1485573 | --- | --- | --- | 1,06 | up   |
| 6167840 | 7031774 | 964724  | --- | --- | --- | 1,00 | up   |
| 6167896 | 7119179 | 1174972 | --- | --- | --- | 1,24 | up   |
| 6167910 | 7043535 | 994086  | --- | --- | --- | 1,12 | down |
| 6168004 | 7281507 | 1576716 | --- | --- | --- | 1,49 | down |
| 6168010 | 7272110 | 1553083 | --- | --- | --- | 1,24 | down |
| 6168086 | 7263248 | 1530612 | --- | --- | --- | 1,46 | up   |
| 6168099 | 7319937 | 1672273 | --- | --- | --- | 1,08 | down |
| 6168202 | 7258670 | 1519345 | --- | --- | --- | 1,53 | up   |
| 6168203 | 7379957 | 1820631 | --- | --- | --- | 1,79 | up   |
| 6168230 | 7356115 | 1760115 | --- | --- | --- | 1,15 | down |
| 6168243 | 7240569 | 1475472 | --- | --- | --- | 1,01 | up   |
| 6168249 | 7294866 | 1608426 | --- | --- | --- | 1,13 | up   |
| 6168300 | 7368729 | 1792045 | --- | --- | --- | 1,11 | up   |

|         |         |         |     |     |     |      |      |
|---------|---------|---------|-----|-----|-----|------|------|
| 6168318 | 7243647 | 1482469 | --- | --- | --- | 1,11 | down |
| 6168340 | 7172373 | 1305589 | --- | --- | --- | 1,34 | up   |
| 6168540 | 7307721 | 1642011 | --- | --- | --- | 1,15 | down |
| 6168567 | 7202550 | 1381607 | --- | --- | --- | 1,34 | down |
| 6168605 | 7071714 | 1060351 | --- | --- | --- | 1,13 | down |
| 6168618 | 7331719 | 1699917 | --- | --- | --- | 1,19 | up   |
| 6168662 | 7070616 | 1057783 | --- | --- | --- | 1,08 | down |
| 6168737 | 7331297 | 1698810 | --- | --- | --- | 1,04 | down |
| 6168859 | 7243603 | 1482275 | --- | --- | --- | 1,01 | up   |
| 6168971 | 7180861 | 1327219 | --- | --- | --- | 1,02 | up   |
| 6168981 | 7189184 | 1347598 | --- | --- | --- | 1,34 | down |
| 6169152 | 7273251 | 1555958 | --- | --- | --- | 1,21 | down |
| 6169155 | 7065655 | 1045266 | --- | --- | --- | 1,07 | down |
| 6169211 | 7064732 | 1042930 | --- | --- | --- | 1,16 | up   |
| 6169424 | 7243653 | 1482529 | --- | --- | --- | 1,02 | up   |
| 6169444 | 7373906 | 1806354 | --- | --- | --- | 1,15 | up   |
| 6169464 | 7260613 | 1524270 | --- | --- | --- | 1,38 | down |
| 6169492 | 7225317 | 1435354 | --- | --- | --- | 1,52 | down |
| 6169506 | 7062529 | 1037852 | --- | --- | --- | 1,13 | down |
| 6169542 | 7059020 | 1029350 | --- | --- | --- | 2,27 | up   |
| 6169543 | 7373633 | 1805712 | --- | --- | --- | 1,28 | up   |
| 6169554 | 7027797 | 956284  | --- | --- | --- | 1,19 | up   |
| 6169562 | 7059766 | 1030973 | --- | --- | --- | 1,07 | down |
| 6169588 | 7108062 | 1147192 | --- | --- | --- | 1,84 | up   |
| 6169639 | 7357815 | 1764131 | --- | --- | --- | 1,07 | up   |
| 6169715 | 7224035 | 1432400 | --- | --- | --- | 1,16 | down |
| 6169927 | 7147809 | 1245469 | --- | --- | --- | 1,05 | up   |
| 6170074 | 7213908 | 1407670 | --- | --- | --- | 1,20 | down |
| 6170230 | 7299512 | 1620545 | --- | --- | --- | 1,06 | up   |
| 6170251 | 7231203 | 1450404 | --- | --- | --- | 1,21 | up   |
| 6170289 | 7065823 | 1045709 | --- | --- | --- | 2,84 | up   |
| 6170311 | 7047524 | 1004665 | --- | --- | --- | 1,53 | up   |
| 6170427 | 7217650 | 1417171 | --- | --- | --- | 1,60 | up   |
| 6170441 | 7263401 | 1530989 | --- | --- | --- | 1,10 | up   |
| 6170876 | 7193056 | 1358274 | --- | --- | --- | 1,08 | down |
| 6170881 | 7052813 | 1015929 | --- | --- | --- | 1,13 | down |
| 6170894 | 7299512 | 1620547 | --- | --- | --- | 1,41 | down |
| 6170914 | 7322260 | 1677072 | --- | --- | --- | 1,15 | down |
| 6170920 | 7064468 | 1042373 | --- | --- | --- | 1,17 | down |
| 6170987 | 7380497 | 1821842 | --- | --- | --- | 1,99 | up   |
| 6171067 | 7180243 | 1325516 | --- | --- | --- | 1,01 | up   |
| 6171070 | 7097680 | 1121732 | --- | --- | --- | 1,15 | up   |
| 6171096 | 7087965 | 1098051 | --- | --- | --- | 1,17 | up   |
| 6171134 | 7183182 | 1333568 | --- | --- | --- | 1,55 | down |
| 6171181 | 7126658 | 1193164 | --- | --- | --- | 1,53 | up   |
| 6171250 | 7307424 | 1641137 | --- | --- | --- | 2,54 | down |
| 6171291 | 7341989 | 1725052 | --- | --- | --- | 1,00 | down |
| 6171321 | 7051009 | 1011775 | --- | --- | --- | 1,34 | down |
| 6171451 | 7039223 | 983560  | --- | --- | --- | 1,20 | up   |
| 6171502 | 7096859 | 1119301 | --- | --- | --- | 1,09 | up   |
| 6171580 | 7186440 | 1341256 | --- | --- | --- | 1,00 | up   |
| 6171698 | 7380497 | 1821874 | --- | --- | --- | 2,08 | down |
| 6171738 | 7196029 | 1365624 | --- | --- | --- | 1,05 | down |
| 6171790 | 7093936 | 1112480 | --- | --- | --- | 1,04 | down |
| 6171962 | 7071969 | 1060904 | --- | --- | --- | 2,10 | down |
| 6171984 | 7222221 | 1428087 | --- | --- | --- | 1,19 | down |

|         |         |         |     |     |     |      |      |
|---------|---------|---------|-----|-----|-----|------|------|
| 6172015 | 7275927 | 1562409 | --- | --- | --- | 1,05 | up   |
| 6172029 | 7330623 | 1696959 | --- | --- | --- | 1,01 | down |
| 6172076 | 7028624 | 958003  | --- | --- | --- | 1,02 | down |
| 6172184 | 7344702 | 1732143 | --- | --- | --- | 1,41 | down |
| 6172203 | 7360486 | 1770935 | --- | --- | --- | 1,14 | down |
| 6172247 | 7076236 | 1071190 | --- | --- | --- | 1,11 | down |
| 6172257 | 7096924 | 1119623 | --- | --- | --- | 1,40 | down |
| 6172347 | 7092549 | 1109118 | --- | --- | --- | 1,59 | up   |
| 6172440 | 7340757 | 1721903 | --- | --- | --- | 1,13 | up   |
| 6172448 | 7336250 | 1710170 | --- | --- | --- | 1,04 | down |
| 6172517 | 7248004 | 1492571 | --- | --- | --- | 1,15 | up   |
| 6172519 | 7172373 | 1305576 | --- | --- | --- | 1,04 | up   |
| 6172557 | 7181193 | 1328305 | --- | --- | --- | 1,31 | down |
| 6172561 | 7148978 | 1248538 | --- | --- | --- | 1,12 | up   |
| 6172591 | 7100257 | 1128282 | --- | --- | --- | 1,08 | up   |
| 6172757 | 7207069 | 1392015 | --- | --- | --- | 1,26 | up   |
| 6172785 | 7248964 | 1494938 | --- | --- | --- | 1,76 | down |
| 6172839 | 7097680 | 1121729 | --- | --- | --- | 1,13 | up   |
| 6172951 | 7067614 | 1050200 | --- | --- | --- | 1,12 | up   |
| 6172973 | 7156061 | 1265834 | --- | --- | --- | 1,12 | up   |
| 6172976 | 7376566 | 1812848 | --- | --- | --- | 1,06 | down |
| 6172985 | 7188685 | 1346306 | --- | --- | --- | 2,34 | up   |
| 6172987 | 7037764 | 980100  | --- | --- | --- | 1,48 | down |
| 6173069 | 7344702 | 1732140 | --- | --- | --- | 1,13 | down |
| 6173144 | 7032444 | 966740  | --- | --- | --- | 1,05 | up   |
| 6173169 | 7034293 | 971945  | --- | --- | --- | 1,71 | up   |
| 6173172 | 7028624 | 957998  | --- | --- | --- | 1,07 | up   |
| 6173188 | 7168403 | 1295585 | --- | --- | --- | 1,13 | down |
| 6173242 | 7340057 | 1720327 | --- | --- | --- | 1,18 | up   |
| 6173263 | 7273220 | 1555863 | --- | --- | --- | 1,08 | up   |
| 6173372 | 7176177 | 1315142 | --- | --- | --- | 1,01 | up   |
| 6173415 | 7142081 | 1230973 | --- | --- | --- | 1,22 | down |
| 6173530 | 7243647 | 1482485 | --- | --- | --- | 1,50 | up   |
| 6173663 | 7111361 | 1155593 | --- | --- | --- | 1,47 | down |
| 6173777 | 7373678 | 1805858 | --- | --- | --- | 1,03 | down |
| 6173847 | 7102976 | 1135044 | --- | --- | --- | 1,07 | down |
| 6173883 | 7071969 | 1060899 | --- | --- | --- | 1,22 | up   |
| 6173926 | 7132125 | 1206614 | --- | --- | --- | 1,55 | down |
| 6174000 | 7056333 | 1023698 | --- | --- | --- | 1,72 | down |
| 6174006 | 7289382 | 1595193 | --- | --- | --- | 1,21 | up   |
| 6174163 | 7365183 | 1781900 | --- | --- | --- | 1,07 | down |
| 6174202 | 7248790 | 1494494 | --- | --- | --- | 1,22 | up   |
| 6174282 | 7039223 | 983565  | --- | --- | --- | 1,44 | down |
| 6174363 | 7261019 | 1525279 | --- | --- | --- | 1,62 | down |
| 6174594 | 7222221 | 1428085 | --- | --- | --- | 1,10 | up   |
| 6174686 | 7333462 | 1703640 | --- | --- | --- | 1,02 | down |
| 6174710 | 7238202 | 1468947 | --- | --- | --- | 1,33 | up   |
| 6174742 | 7127540 | 1195283 | --- | --- | --- | 1,07 | up   |
| 6174826 | 7155116 | 1263436 | --- | --- | --- | 1,60 | up   |
| 6174889 | 7052813 | 1015939 | --- | --- | --- | 1,04 | up   |
| 6174918 | 7175368 | 1313287 | --- | --- | --- | 1,03 | down |
| 6175145 | 7072765 | 1062734 | --- | --- | --- | 1,06 | up   |
| 6175191 | 7326612 | 1687204 | --- | --- | --- | 1,20 | up   |
| 6175194 | 7243130 | 1480892 | --- | --- | --- | 1,22 | up   |
| 6175286 | 7069464 | 1054669 | --- | --- | --- | 2,67 | up   |
| 6175323 | 7321029 | 1674812 | --- | --- | --- | 1,77 | down |

|         |         |         |     |     |     |      |      |
|---------|---------|---------|-----|-----|-----|------|------|
| 6175383 | 7200129 | 1375995 | --- | --- | --- | 1,64 | up   |
| 6175426 | 7112225 | 1157570 | --- | --- | --- | 1,17 | up   |
| 6175429 | 7329135 | 1693499 | --- | --- | --- | 1,18 | down |
| 6175437 | 7240569 | 1475464 | --- | --- | --- | 1,16 | down |
| 6175458 | 7372840 | 1803754 | --- | --- | --- | 1,37 | down |
| 6175492 | 7190524 | 1351184 | --- | --- | --- | 1,09 | down |
| 6175519 | 7205216 | 1387721 | --- | --- | --- | 1,32 | up   |
| 6175546 | 7040260 | 986067  | --- | --- | --- | 1,10 | up   |
| 6175598 | 7064224 | 1041780 | --- | --- | --- | 1,17 | down |
| 6175609 | 7067670 | 1050301 | --- | --- | --- | 1,38 | up   |
| 6175641 | 7181590 | 1329430 | --- | --- | --- | 1,43 | up   |
| 6175653 | 7234195 | 1458970 | --- | --- | --- | 1,11 | up   |
| 6175738 | 7098126 | 1122982 | --- | --- | --- | 1,31 | down |
| 6175763 | 7104920 | 1140071 | --- | --- | --- | 1,07 | down |
| 6175900 | 7161300 | 1278549 | --- | --- | --- | 1,73 | up   |
| 6175910 | 7072552 | 1062133 | --- | --- | --- | 1,41 | down |
| 6176048 | 7194017 | 1360791 | --- | --- | --- | 1,52 | up   |
| 6176265 | 7228530 | 1443789 | --- | --- | --- | 1,17 | up   |
| 6176452 | 7384073 | 1829465 | --- | --- | --- | 1,15 | up   |
| 6176476 | 7112672 | 1158977 | --- | --- | --- | 1,48 | up   |
| 6176499 | 7143455 | 1234737 | --- | --- | --- | 1,08 | up   |
| 6176583 | 7093806 | 1112152 | --- | --- | --- | 2,76 | down |
| 6176623 | 7114108 | 1162449 | --- | --- | --- | 1,02 | up   |
| 6176626 | 7067828 | 1050799 | --- | --- | --- | 1,04 | down |
| 6176656 | 7058713 | 1028659 | --- | --- | --- | 1,13 | down |
| 6176715 | 7286807 | 1588843 | --- | --- | --- | 1,31 | up   |
| 6176720 | 7027797 | 956311  | --- | --- | --- | 1,52 | down |
| 6176730 | 7235521 | 1462143 | --- | --- | --- | 1,19 | up   |
| 6176732 | 7071264 | 1059362 | --- | --- | --- | 1,22 | down |
| 6176811 | 7093158 | 1110518 | --- | --- | --- | 1,12 | down |
| 6176866 | 7074132 | 1066318 | --- | --- | --- | 1,34 | down |
| 6176897 | 7324337 | 1682063 | --- | --- | --- | 1,24 | down |
| 6176932 | 7065265 | 1044574 | --- | --- | --- | 1,31 | up   |
| 6177024 | 7232340 | 1453518 | --- | --- | --- | 1,06 | down |
| 6177105 | 7156978 | 1268179 | --- | --- | --- | 1,16 | up   |
| 6177184 | 7036412 | 976862  | --- | --- | --- | 1,07 | down |
| 6177269 | 7195903 | 1365340 | --- | --- | --- | 1,05 | down |
| 6177278 | 7333100 | 1702838 | --- | --- | --- | 1,06 | up   |
| 6177322 | 7248790 | 1494486 | --- | --- | --- | 1,02 | down |
| 6177352 | 7154655 | 1262315 | --- | --- | --- | 1,15 | up   |
| 6177370 | 7059766 | 1030976 | --- | --- | --- | 1,08 | up   |
| 6177619 | 7033504 | 969867  | --- | --- | --- | 1,06 | up   |
| 6177655 | 7098867 | 1124935 | --- | --- | --- | 1,27 | down |
| 6177742 | 7115362 | 1165601 | --- | --- | --- | 1,42 | down |
| 6177780 | 7170832 | 1301797 | --- | --- | --- | 1,83 | up   |
| 6177915 | 7275103 | 1560184 | --- | --- | --- | 1,24 | down |
| 6177920 | 7083160 | 1086533 | --- | --- | --- | 1,52 | down |
| 6178061 | 7344530 | 1731559 | --- | --- | --- | 1,18 | down |
| 6178285 | 7243628 | 1482364 | --- | --- | --- | 1,04 | down |
| 6178287 | 7316644 | 1664025 | --- | --- | --- | 1,17 | down |
| 6178384 | 7231775 | 1452131 | --- | --- | --- | 1,02 | up   |
| 6178435 | 7333487 | 1703677 | --- | --- | --- | 1,50 | up   |
| 6178439 | 7108345 | 1148071 | --- | --- | --- | 1,18 | down |
| 6178561 | 7344190 | 1730614 | --- | --- | --- | 1,05 | up   |
| 6178609 | 7384509 | 1830727 | --- | --- | --- | 1,33 | up   |
| 6178632 | 7243647 | 1482439 | --- | --- | --- | 1,09 | up   |



|         |         |         |     |     |     |      |      |
|---------|---------|---------|-----|-----|-----|------|------|
| 6178675 | 7236254 | 1464056 | --- | --- | --- | 1,59 | down |
| 6178688 | 7297589 | 1615644 | --- | --- | --- | 1,32 | down |
| 6178698 | 7307721 | 1642007 | --- | --- | --- | 1,57 | down |
| 6178927 | 7297483 | 1615280 | --- | --- | --- | 1,65 | up   |
| 6178939 | 7286807 | 1588805 | --- | --- | --- | 1,07 | down |
| 6178991 | 7156061 | 1265812 | --- | --- | --- | 1,12 | up   |
| 6179042 | 7364346 | 1779999 | --- | --- | --- | 1,41 | up   |
| 6179085 | 7193056 | 1358284 | --- | --- | --- | 1,20 | up   |
| 6179209 | 7344406 | 1731249 | --- | --- | --- | 1,09 | up   |
| 6179342 | 7209927 | 1398924 | --- | --- | --- | 1,18 | down |
| 6179443 | 7331719 | 1699924 | --- | --- | --- | 2,13 | down |
| 6179718 | 7139026 | 1223510 | --- | --- | --- | 1,02 | up   |
| 6179762 | 7136977 | 1218819 | --- | --- | --- | 1,74 | up   |
| 6179772 | 7272110 | 1553031 | --- | --- | --- | 1,40 | down |
| 6179878 | 7268736 | 1544316 | --- | --- | --- | 1,33 | down |
| 6179902 | 7054958 | 1020572 | --- | --- | --- | 1,04 | down |
| 6179966 | 7244290 | 1484145 | --- | --- | --- | 1,26 | down |
| 6180018 | 7189574 | 1348704 | --- | --- | --- | 1,04 | up   |
| 6180047 | 7127540 | 1195271 | --- | --- | --- | 1,05 | down |
| 6180089 | 7245695 | 1487062 | --- | --- | --- | 1,11 | down |
| 6180194 | 7291054 | 1599404 | --- | --- | --- | 1,17 | down |
| 6180269 | 7071895 | 1060753 | --- | --- | --- | 1,16 | up   |
| 6180315 | 7231775 | 1452135 | --- | --- | --- | 1,06 | down |
| 6180344 | 7294264 | 1606843 | --- | --- | --- | 1,28 | down |
| 6180457 | 7240232 | 1474416 | --- | --- | --- | 1,50 | down |
| 6180493 | 7068259 | 1051593 | --- | --- | --- | 1,01 | up   |
| 6180569 | 7127797 | 1195853 | --- | --- | --- | 1,02 | up   |
| 6180684 | 7336250 | 1710164 | --- | --- | --- | 1,78 | up   |
| 6180793 | 7113483 | 1160994 | --- | --- | --- | 1,22 | down |
| 6180795 | 7277719 | 1567069 | --- | --- | --- | 1,30 | up   |
| 6180820 | 7145669 | 1240016 | --- | --- | --- | 1,63 | down |
| 6180824 | 7073950 | 1065936 | --- | --- | --- | 1,40 | up   |
| 6181132 | 7061367 | 1034835 | --- | --- | --- | 1,25 | down |
| 6181186 | 7136977 | 1218819 | --- | --- | --- | 2,93 | down |
| 6181399 | 7364346 | 1780015 | --- | --- | --- | 1,02 | down |
| 6181510 | 7301890 | 1626685 | --- | --- | --- | 1,16 | down |
| 6181681 | 7329846 | 1694992 | --- | --- | --- | 1,76 | up   |
| 6181693 | 7365093 | 1781617 | --- | --- | --- | 1,28 | down |
| 6181744 | 7337260 | 1712807 | --- | --- | --- | 1,16 | down |
| 6181756 | 7041584 | 989459  | --- | --- | --- | 1,33 | down |
| 6181791 | 7180732 | 1326737 | --- | --- | --- | 1,26 | down |
| 6181837 | 7286807 | 1588844 | --- | --- | --- | 1,10 | up   |
| 6181899 | 7259923 | 1522526 | --- | --- | --- | 1,07 | up   |
| 6182095 | 7287222 | 1589743 | --- | --- | --- | 1,18 | up   |
| 6182134 | 7249503 | 1496203 | --- | --- | --- | 1,02 | up   |
| 6182247 | 7144389 | 1236781 | --- | --- | --- | 1,37 | down |
| 6182401 | 7340838 | 1722087 | --- | --- | --- | 1,09 | down |
| 6182491 | 7217747 | 1417479 | --- | --- | --- | 1,16 | up   |
| 6182545 | 7233970 | 1458274 | --- | --- | --- | 2,19 | up   |
| 6182630 | 7312338 | 1652764 | --- | --- | --- | 1,72 | down |
| 6182664 | 7065827 | 1045721 | --- | --- | --- | 1,07 | down |
| 6182775 | 7353712 | 1753946 | --- | --- | --- | 1,21 | down |
| 6182805 | 7339379 | 1718356 | --- | --- | --- | 2,16 | down |
| 6182871 | 7356115 | 1760127 | --- | --- | --- | 1,12 | up   |
| 6182973 | 7320234 | 1672986 | --- | --- | --- | 1,47 | up   |
| 6183311 | 7039589 | 984510  | --- | --- | --- | 1,55 | down |

|         |         |         |     |     |     |      |      |
|---------|---------|---------|-----|-----|-----|------|------|
| 6183320 | 7271128 | 1550317 | --- | --- | --- | 1,60 | down |
| 6183325 | 7297274 | 1614657 | --- | --- | --- | 1,51 | down |
| 6183478 | 7237132 | 1466111 | --- | --- | --- | 1,39 | up   |
| 6183515 | 7173863 | 1309712 | --- | --- | --- | 1,03 | up   |
| 6183524 | 7331434 | 1699226 | --- | --- | --- | 1,31 | down |
| 6183546 | 7280743 | 1574523 | --- | --- | --- | 2,38 | down |
| 6183554 | 7068942 | 1053377 | --- | --- | --- | 1,63 | down |
| 6183605 | 7122131 | 1182668 | --- | --- | --- | 2,45 | down |
| 6183815 | 7303722 | 1631713 | --- | --- | --- | 1,16 | down |
| 6183817 | 7303616 | 1631375 | --- | --- | --- | 1,13 | down |
| 6183873 | 7339110 | 1717617 | --- | --- | --- | 1,00 | up   |
| 6183905 | 7127797 | 1195853 | --- | --- | --- | 1,10 | up   |
| 6183946 | 7111573 | 1156021 | --- | --- | --- | 1,27 | down |
| 6184111 | 7031618 | 964206  | --- | --- | --- | 1,19 | down |
| 6184226 | 7111427 | 1155773 | --- | --- | --- | 1,22 | down |
| 6184373 | 7237711 | 1467432 | --- | --- | --- | 1,06 | down |
| 6184379 | 7199476 | 1374552 | --- | --- | --- | 1,15 | down |
| 6184404 | 7351951 | 1749832 | --- | --- | --- | 1,31 | up   |
| 6184451 | 7260553 | 1524109 | --- | --- | --- | 2,43 | down |
| 6184465 | 7364346 | 1780003 | --- | --- | --- | 1,13 | down |
| 6184478 | 7200545 | 1376896 | --- | --- | --- | 1,19 | up   |
| 6184530 | 7225553 | 1435976 | --- | --- | --- | 1,46 | down |
| 6184674 | 7295410 | 1609794 | --- | --- | --- | 1,14 | up   |
| 6184689 | 7145669 | 1240011 | --- | --- | --- | 1,08 | up   |
| 6184837 | 7052385 | 1014796 | --- | --- | --- | 1,01 | up   |
| 6184858 | 7174149 | 1310504 | --- | --- | --- | 2,05 | down |
| 6184907 | 7247229 | 1490535 | --- | --- | --- | 1,08 | down |
| 6184945 | 7279568 | 1572001 | --- | --- | --- | 1,72 | up   |
| 6185203 | 7297274 | 1614644 | --- | --- | --- | 1,11 | down |
| 6185226 | 7339379 | 1718361 | --- | --- | --- | 1,23 | down |
| 6185241 | 7038969 | 982977  | --- | --- | --- | 1,30 | down |
| 6185535 | 7072332 | 1061647 | --- | --- | --- | 1,71 | up   |
| 6185540 | 7337224 | 1712548 | --- | --- | --- | 1,16 | up   |
| 6185546 | 7088164 | 1098467 | --- | --- | --- | 1,39 | up   |
| 6185613 | 7260613 | 1524298 | --- | --- | --- | 1,43 | down |
| 6185627 | 7230611 | 1448822 | --- | --- | --- | 1,33 | up   |
| 6185676 | 7363768 | 1778601 | --- | --- | --- | 1,15 | up   |
| 6185687 | 7067406 | 1049591 | --- | --- | --- | 1,05 | down |
| 6185720 | 7303616 | 1631367 | --- | --- | --- | 1,03 | up   |
| 6185785 | 7034486 | 972530  | --- | --- | --- | 1,15 | up   |
| 6185903 | 7027795 | 956273  | --- | --- | --- | 1,69 | down |
| 6185952 | 7378997 | 1818651 | --- | --- | --- | 1,13 | up   |
| 6186069 | 7065266 | 1044594 | --- | --- | --- | 1,89 | down |
| 6186070 | 7096859 | 1119322 | --- | --- | --- | 1,08 | up   |
| 6186153 | 7351951 | 1749834 | --- | --- | --- | 1,34 | up   |
| 6186532 | 7338807 | 1716796 | --- | --- | --- | 1,08 | down |
| 6186534 | 7108345 | 1148074 | --- | --- | --- | 1,36 | down |
| 6186577 | 7236851 | 1465392 | --- | --- | --- | 1,03 | up   |
| 6186584 | 7195903 | 1365335 | --- | --- | --- | 1,04 | down |
| 6186698 | 7253408 | 1505953 | --- | --- | --- | 1,18 | up   |
| 6186724 | 7155116 | 1263398 | --- | --- | --- | 1,17 | up   |
| 6186909 | 7075445 | 1069340 | --- | --- | --- | 1,14 | down |
| 6186935 | 7243653 | 1482536 | --- | --- | --- | 2,02 | down |
| 6186949 | 7294151 | 1606615 | --- | --- | --- | 1,00 | down |
| 6186982 | 7114108 | 1162446 | --- | --- | --- | 1,14 | down |
| 6187101 | 7131360 | 1204972 | --- | --- | --- | 1,01 | down |

|         |         |         |     |     |     |      |      |
|---------|---------|---------|-----|-----|-----|------|------|
| 6187235 | 7090278 | 1104136 | --- | --- | --- | 1,54 | down |
| 6187693 | 7323522 | 1679829 | --- | --- | --- | 1,20 | down |
| 6187839 | 7326612 | 1687195 | --- | --- | --- | 1,09 | down |
| 6187841 | 7253088 | 1505120 | --- | --- | --- | 1,25 | up   |
| 6187862 | 7339379 | 1718336 | --- | --- | --- | 1,02 | down |
| 6188082 | 7115880 | 1166836 | --- | --- | --- | 1,15 | down |
| 6188109 | 7052385 | 1014780 | --- | --- | --- | 1,00 | up   |
| 6188120 | 7298920 | 1618828 | --- | --- | --- | 1,36 | down |
| 6188194 | 7038316 | 981458  | --- | --- | --- | 1,26 | up   |
| 6188240 | 7151063 | 1253072 | --- | --- | --- | 1,56 | up   |
| 6188270 | 7156052 | 1265759 | --- | --- | --- | 1,19 | down |
| 6188311 | 7291853 | 1600977 | --- | --- | --- | 1,78 | down |
| 6188364 | 7274780 | 1559230 | --- | --- | --- | 1,04 | down |
| 6188378 | 7058713 | 1028664 | --- | --- | --- | 1,09 | down |
| 6188411 | 7369712 | 1794827 | --- | --- | --- | 1,09 | up   |
| 6188456 | 7065265 | 1044557 | --- | --- | --- | 1,19 | up   |
| 6188553 | 7080731 | 1080979 | --- | --- | --- | 1,51 | down |
| 6188564 | 7247229 | 1490538 | --- | --- | --- | 2,08 | down |
| 6188627 | 7148978 | 1248498 | --- | --- | --- | 1,54 | down |
| 6188710 | 7099294 | 1126104 | --- | --- | --- | 1,00 | up   |
| 6188858 | 7070836 | 1058362 | --- | --- | --- | 1,42 | down |
| 6188862 | 7236254 | 1464065 | --- | --- | --- | 1,13 | up   |
| 6188916 | 7243653 | 1482527 | --- | --- | --- | 1,12 | up   |
| 6188927 | 7315206 | 1660029 | --- | --- | --- | 1,48 | up   |
| 6188956 | 7359551 | 1768620 | --- | --- | --- | 1,26 | up   |
| 6188983 | 7037495 | 979322  | --- | --- | --- | 1,28 | down |
| 6189044 | 7033337 | 969487  | --- | --- | --- | 1,39 | down |
| 6189101 | 7098451 | 1123808 | --- | --- | --- | 1,22 | up   |
| 6189126 | 7197056 | 1367835 | --- | --- | --- | 1,69 | down |
| 6189298 | 7059375 | 1030057 | --- | --- | --- | 1,42 | down |
| 6189403 | 7303616 | 1631358 | --- | --- | --- | 1,19 | down |
| 6189511 | 7146982 | 1243294 | --- | --- | --- | 1,05 | down |
| 6189570 | 7189184 | 1347606 | --- | --- | --- | 1,45 | down |
| 6189594 | 7116103 | 1167599 | --- | --- | --- | 1,77 | down |
| 6189654 | 7360486 | 1771003 | --- | --- | --- | 1,27 | down |
| 6189656 | 7330238 | 1695925 | --- | --- | --- | 1,42 | up   |
| 6189676 | 7102976 | 1135054 | --- | --- | --- | 1,04 | down |
| 6189758 | 7293234 | 1604333 | --- | --- | --- | 2,07 | up   |
| 6189866 | 7293757 | 1605675 | --- | --- | --- | 1,09 | up   |
| 6189920 | 7297589 | 1615652 | --- | --- | --- | 1,18 | up   |
| 6189928 | 7363132 | 1776957 | --- | --- | --- | 1,01 | down |
| 6189984 | 7071264 | 1059283 | --- | --- | --- | 1,82 | up   |
| 6189992 | 7086966 | 1095251 | --- | --- | --- | 1,33 | down |
| 6190118 | 7082098 | 1084120 | --- | --- | --- | 1,01 | up   |
| 6190234 | 7067828 | 1050781 | --- | --- | --- | 1,04 | down |
| 6190264 | 7086522 | 1093956 | --- | --- | --- | 1,93 | down |
| 6190279 | 7092549 | 1109131 | --- | --- | --- | 1,46 | down |
| 6190329 | 7292154 | 1601631 | --- | --- | --- | 1,72 | down |
| 6190339 | 7065827 | 1045721 | --- | --- | --- | 1,02 | up   |
| 6190352 | 7345465 | 1733851 | --- | --- | --- | 1,63 | down |
| 6190494 | 7038610 | 982076  | --- | --- | --- | 1,53 | down |
| 6190641 | 7088489 | 1099519 | --- | --- | --- | 2,04 | down |
| 6190658 | 7127257 | 1194813 | --- | --- | --- | 1,17 | down |
| 6190700 | 7068942 | 1053394 | --- | --- | --- | 1,26 | down |
| 6190719 | 7053874 | 1018335 | --- | --- | --- | 1,06 | down |
| 6190761 | 7097525 | 1121051 | --- | --- | --- | 1,01 | down |

|         |         |         |     |     |     |      |      |
|---------|---------|---------|-----|-----|-----|------|------|
| 6190766 | 7069830 | 1055603 | --- | --- | --- | 1,61 | up   |
| 6190794 | 7303616 | 1631359 | --- | --- | --- | 1,06 | up   |
| 6190814 | 7102113 | 1132841 | --- | --- | --- | 1,04 | up   |
| 6190927 | 7068259 | 1051617 | --- | --- | --- | 1,56 | up   |
| 6190930 | 7111573 | 1156033 | --- | --- | --- | 1,42 | down |
| 6190953 | 7303616 | 1631358 | --- | --- | --- | 1,09 | up   |
| 6191158 | 7203872 | 1384760 | --- | --- | --- | 1,19 | down |
| 6191200 | 7168914 | 1297025 | --- | --- | --- | 1,01 | down |
| 6191286 | 7384509 | 1830736 | --- | --- | --- | 1,26 | down |
| 6191323 | 7169573 | 1298391 | --- | --- | --- | 1,23 | up   |
| 6191324 | 7299512 | 1620555 | --- | --- | --- | 1,03 | down |
| 6191519 | 7160053 | 1275389 | --- | --- | --- | 1,09 | down |
| 6191590 | 7320337 | 1673307 | --- | --- | --- | 1,20 | up   |
| 6191628 | 7034293 | 971995  | --- | --- | --- | 1,20 | up   |
| 6191709 | 7253272 | 1505701 | --- | --- | --- | 1,04 | down |
| 6191713 | 7132020 | 1206320 | --- | --- | --- | 1,57 | up   |
| 6191731 | 7156052 | 1265772 | --- | --- | --- | 1,14 | up   |
| 6191749 | 7297274 | 1614660 | --- | --- | --- | 1,01 | up   |
| 6191856 | 7378997 | 1818661 | --- | --- | --- | 1,03 | up   |
| 6191861 | 7064224 | 1041782 | --- | --- | --- | 1,06 | up   |
| 6191882 | 7316644 | 1664009 | --- | --- | --- | 1,09 | down |
| 6191939 | 7290793 | 1598625 | --- | --- | --- | 1,41 | down |
| 6191998 | 7245066 | 1485577 | --- | --- | --- | 1,19 | down |
| 6192051 | 7154655 | 1262318 | --- | --- | --- | 1,17 | down |
| 6192093 | 7088625 | 1099864 | --- | --- | --- | 1,25 | up   |
| 6192096 | 7049399 | 1008333 | --- | --- | --- | 1,12 | down |
| 6192175 | 7072552 | 1062133 | --- | --- | --- | 1,00 | up   |
| 6192199 | 7199476 | 1374521 | --- | --- | --- | 1,38 | down |
| 6192246 | 7379957 | 1820637 | --- | --- | --- | 1,29 | down |
| 6192361 | 7217679 | 1417309 | --- | --- | --- | 1,04 | down |
| 6192397 | 7083030 | 1086269 | --- | --- | --- | 1,56 | up   |
| 6192407 | 7032618 | 967315  | --- | --- | --- | 1,22 | down |
| 6192418 | 7115146 | 1164935 | --- | --- | --- | 1,01 | up   |
| 6192534 | 7281923 | 1577696 | --- | --- | --- | 1,65 | down |
| 6192841 | 7350993 | 1747534 | --- | --- | --- | 1,02 | down |
| 6192846 | 7341546 | 1723950 | --- | --- | --- | 2,98 | down |
| 6192851 | 7243647 | 1482427 | --- | --- | --- | 1,42 | down |
| 6192944 | 7148978 | 1248457 | --- | --- | --- | 1,34 | down |
| 6192978 | 7336931 | 1711853 | --- | --- | --- | 1,02 | down |
| 6193029 | 7240569 | 1475493 | --- | --- | --- | 1,52 | up   |
| 6193082 | 7295410 | 1609778 | --- | --- | --- | 1,11 | up   |
| 6193084 | 7084193 | 1089126 | --- | --- | --- | 1,85 | up   |
| 6193232 | 7379957 | 1820639 | --- | --- | --- | 1,16 | up   |
| 6193372 | 7337224 | 1712627 | --- | --- | --- | 1,08 | down |
| 6193377 | 7116614 | 1168789 | --- | --- | --- | 1,21 | up   |
| 6193468 | 7267380 | 1540403 | --- | --- | --- | 1,54 | down |
| 6193487 | 7176177 | 1315143 | --- | --- | --- | 1,96 | up   |
| 6193522 | 7067670 | 1050374 | --- | --- | --- | 1,20 | down |
| 6193573 | 7092965 | 1110187 | --- | --- | --- | 1,00 | up   |
| 6193645 | 7142081 | 1230967 | --- | --- | --- | 1,06 | down |
| 6193661 | 7186305 | 1341002 | --- | --- | --- | 1,50 | down |
| 6193693 | 7069253 | 1054141 | --- | --- | --- | 1,40 | down |
| 6193705 | 7142081 | 1230954 | --- | --- | --- | 1,20 | up   |
| 6193865 | 7259923 | 1522532 | --- | --- | --- | 1,19 | down |
| 6193872 | 7319065 | 1669979 | --- | --- | --- | 1,95 | up   |
| 6193932 | 7331829 | 1700185 | --- | --- | --- | 2,08 | up   |

|         |         |         |     |     |     |      |      |
|---------|---------|---------|-----|-----|-----|------|------|
| 6193946 | 7284359 | 1583435 | --- | --- | --- | 2,19 | down |
| 6194098 | 7244288 | 1484094 | --- | --- | --- | 1,42 | up   |
| 6194273 | 7143988 | 1235961 | --- | --- | --- | 1,42 | down |
| 6194354 | 7260613 | 1524267 | --- | --- | --- | 1,07 | down |
| 6194370 | 7076236 | 1071196 | --- | --- | --- | 1,13 | up   |
| 6194444 | 7031774 | 964652  | --- | --- | --- | 1,06 | up   |
| 6194460 | 7112225 | 1157533 | --- | --- | --- | 1,80 | up   |
| 6194518 | 7270397 | 1548130 | --- | --- | --- | 1,64 | down |
| 6194533 | 7340258 | 1720743 | --- | --- | --- | 1,37 | down |
| 6194620 | 7169599 | 1298446 | --- | --- | --- | 1,45 | up   |
| 6194692 | 7059375 | 1030052 | --- | --- | --- | 1,19 | up   |
| 6194757 | 7248964 | 1494947 | --- | --- | --- | 1,00 | down |
| 6194817 | 7089381 | 1102058 | --- | --- | --- | 1,39 | down |
| 6194865 | 7234040 | 1458505 | --- | --- | --- | 1,04 | down |
| 6194922 | 7321029 | 1674818 | --- | --- | --- | 1,32 | down |
| 6194961 | 7239939 | 1473798 | --- | --- | --- | 2,15 | up   |
| 6195045 | 7149817 | 1250304 | --- | --- | --- | 1,86 | up   |
| 6195060 | 7168858 | 1296829 | --- | --- | --- | 1,11 | up   |
| 6195106 | 7255120 | 1510371 | --- | --- | --- | 1,21 | up   |
| 6195124 | 7289069 | 1594393 | --- | --- | --- | 1,05 | up   |
| 6195202 | 7244290 | 1484145 | --- | --- | --- | 1,16 | up   |
| 6195274 | 7248964 | 1494946 | --- | --- | --- | 1,11 | up   |
| 6195305 | 7034353 | 972138  | --- | --- | --- | 1,01 | down |
| 6195468 | 7073928 | 1065816 | --- | --- | --- | 2,61 | down |
| 6195470 | 7088625 | 1099873 | --- | --- | --- | 1,16 | up   |
| 6195503 | 7384365 | 1830282 | --- | --- | --- | 1,20 | down |
| 6195550 | 7339387 | 1718372 | --- | --- | --- | 1,48 | down |
| 6195584 | 7288095 | 1592051 | --- | --- | --- | 1,27 | down |
| 6195715 | 7142081 | 1230947 | --- | --- | --- | 1,26 | down |
| 6195823 | 7210387 | 1400042 | --- | --- | --- | 1,32 | down |
| 6195830 | 7233359 | 1456514 | --- | --- | --- | 1,01 | down |
| 6195855 | 7236254 | 1464075 | --- | --- | --- | 1,68 | up   |
| 6195862 | 7380497 | 1821846 | --- | --- | --- | 1,26 | down |
| 6195951 | 7293454 | 1604953 | --- | --- | --- | 1,03 | down |
| 6196010 | 7112570 | 1158685 | --- | --- | --- | 1,44 | up   |
| 6196106 | 7248790 | 1494539 | --- | --- | --- | 1,45 | down |
| 6196144 | 7227313 | 1440661 | --- | --- | --- | 1,32 | down |
| 6196167 | 7038316 | 981460  | --- | --- | --- | 1,04 | up   |
| 6196175 | 7131360 | 1204974 | --- | --- | --- | 1,38 | up   |
| 6196266 | 7084993 | 1090666 | --- | --- | --- | 1,05 | down |
| 6196315 | 7056333 | 1023674 | --- | --- | --- | 2,23 | down |
| 6196327 | 7146982 | 1243293 | --- | --- | --- | 1,14 | down |
| 6196339 | 7275674 | 1561644 | --- | --- | --- | 2,28 | up   |
| 6196498 | 7087965 | 1098057 | --- | --- | --- | 1,41 | down |
| 6196644 | 7350489 | 1746111 | --- | --- | --- | 1,02 | down |
| 6196674 | 7228656 | 1444244 | --- | --- | --- | 1,17 | down |
| 6196718 | 7294264 | 1606843 | --- | --- | --- | 1,36 | up   |
| 6196721 | 7032074 | 965638  | --- | --- | --- | 1,46 | up   |
| 6196757 | 7032444 | 966756  | --- | --- | --- | 1,23 | down |
| 6196765 | 7210780 | 1400862 | --- | --- | --- | 1,08 | down |
| 6196979 | 7060851 | 1033439 | --- | --- | --- | 1,07 | up   |
| 6197002 | 7093806 | 1112148 | --- | --- | --- | 1,11 | down |
| 6197072 | 7030518 | 961682  | --- | --- | --- | 1,39 | up   |
| 6197078 | 7291054 | 1599394 | --- | --- | --- | 1,15 | up   |
| 6197097 | 7057277 | 1025523 | --- | --- | --- | 2,17 | up   |
| 6197168 | 7243647 | 1482474 | --- | --- | --- | 1,13 | down |

|         |         |         |     |     |     |      |      |
|---------|---------|---------|-----|-----|-----|------|------|
| 6197212 | 7086966 | 1095241 | --- | --- | --- | 1,21 | up   |
| 6197289 | 7380497 | 1821830 | --- | --- | --- | 1,28 | down |
| 6197323 | 7084993 | 1090666 | --- | --- | --- | 1,38 | down |
| 6197368 | 7249917 | 1497394 | --- | --- | --- | 1,30 | up   |
| 6197483 | 7078198 | 1075614 | --- | --- | --- | 1,75 | up   |
| 6197490 | 7113984 | 1162228 | --- | --- | --- | 1,21 | down |
| 6197525 | 7069830 | 1055628 | --- | --- | --- | 1,16 | up   |
| 6197547 | 7217679 | 1417314 | --- | --- | --- | 1,97 | up   |
| 6197732 | 7349946 | 1744951 | --- | --- | --- | 1,16 | down |
| 6197836 | 7059766 | 1030973 | --- | --- | --- | 1,08 | down |
| 6198088 | 7360325 | 1770499 | --- | --- | --- | 1,07 | up   |
| 6198090 | 7303616 | 1631374 | --- | --- | --- | 1,32 | up   |
| 6198234 | 7245874 | 1487588 | --- | --- | --- | 1,20 | up   |
| 6198328 | 7067670 | 1050373 | --- | --- | --- | 1,52 | down |
| 6198401 | 7174114 | 1310424 | --- | --- | --- | 1,09 | up   |
| 6198527 | 7373417 | 1805094 | --- | --- | --- | 1,37 | up   |
| 6198533 | 7127257 | 1194802 | --- | --- | --- | 1,38 | down |
| 6198538 | 7274780 | 1559212 | --- | --- | --- | 1,05 | down |
| 6198623 | 7225317 | 1435356 | --- | --- | --- | 1,38 | up   |
| 6198653 | 7092549 | 1109201 | --- | --- | --- | 1,25 | up   |
| 6198668 | 7240569 | 1475320 | --- | --- | --- | 1,37 | up   |
| 6198670 | 7346505 | 1736289 | --- | --- | --- | 1,25 | down |
| 6198732 | 7069830 | 1055656 | --- | --- | --- | 1,43 | down |
| 6198826 | 7072225 | 1061405 | --- | --- | --- | 1,86 | up   |
| 6198988 | 7059375 | 1030075 | --- | --- | --- | 1,09 | down |
| 6199077 | 7122486 | 1183421 | --- | --- | --- | 1,05 | up   |
| 6199107 | 7253088 | 1505124 | --- | --- | --- | 1,01 | up   |
| 6199138 | 7237719 | 1467477 | --- | --- | --- | 1,01 | up   |
| 6199180 | 7367748 | 1788255 | --- | --- | --- | 1,02 | up   |
| 6199222 | 7280743 | 1574535 | --- | --- | --- | 1,00 | up   |
| 6199273 | 7247954 | 1492393 | --- | --- | --- | 1,10 | up   |
| 6199304 | 7319937 | 1672317 | --- | --- | --- | 1,06 | down |
| 6199309 | 7358859 | 1767015 | --- | --- | --- | 1,13 | down |
| 6199322 | 7098189 | 1123154 | --- | --- | --- | 1,21 | up   |
| 6199401 | 7038153 | 981158  | --- | --- | --- | 1,21 | up   |
| 6199804 | 7252051 | 1502480 | --- | --- | --- | 1,09 | down |
| 6199805 | 7096859 | 1119333 | --- | --- | --- | 1,28 | down |
| 6199911 | 7056304 | 1023537 | --- | --- | --- | 1,10 | down |
| 6199957 | 7243130 | 1480886 | --- | --- | --- | 1,17 | up   |
| 6200213 | 7101643 | 1131574 | --- | --- | --- | 1,43 | down |
| 6200342 | 7331829 | 1700178 | --- | --- | --- | 1,09 | down |
| 6200401 | 7210445 | 1400146 | --- | --- | --- | 1,80 | down |
| 6200613 | 7117187 | 1170158 | --- | --- | --- | 1,20 | down |
| 6200864 | 7192902 | 1357765 | --- | --- | --- | 1,18 | up   |
| 6200924 | 7068853 | 1053127 | --- | --- | --- | 1,12 | up   |
| 6200998 | 7292154 | 1601690 | --- | --- | --- | 1,42 | up   |
| 6201047 | 7279568 | 1572020 | --- | --- | --- | 1,05 | down |
| 6201083 | 7337224 | 1712556 | --- | --- | --- | 1,32 | down |
| 6201101 | 7113483 | 1161023 | --- | --- | --- | 1,54 | down |
| 6201199 | 7198210 | 1370979 | --- | --- | --- | 1,07 | up   |
| 6201230 | 7037764 | 979993  | --- | --- | --- | 1,22 | down |
| 6201465 | 7059766 | 1030979 | --- | --- | --- | 1,46 | down |
| 6201478 | 7150348 | 1251381 | --- | --- | --- | 1,04 | down |
| 6201537 | 7192186 | 1355619 | --- | --- | --- | 1,05 | down |
| 6201586 | 7096859 | 1119298 | --- | --- | --- | 1,35 | down |
| 6201612 | 7323545 | 1679951 | --- | --- | --- | 1,27 | up   |

|         |         |         |     |     |     |      |      |
|---------|---------|---------|-----|-----|-----|------|------|
| 6201666 | 7274892 | 1559571 | --- | --- | --- | 1,45 | down |
| 6201744 | 7337845 | 1714347 | --- | --- | --- | 1,10 | up   |
| 6201771 | 7352100 | 1750215 | --- | --- | --- | 1,07 | down |
| 6201906 | 7159027 | 1272718 | --- | --- | --- | 1,53 | down |
| 6201913 | 7374842 | 1809000 | --- | --- | --- | 1,25 | down |
| 6202066 | 7087965 | 1098051 | --- | --- | --- | 1,04 | up   |
| 6202071 | 7254040 | 1507590 | --- | --- | --- | 1,04 | up   |
| 6202125 | 7240224 | 1474390 | --- | --- | --- | 1,01 | down |
| 6202156 | 7070616 | 1057780 | --- | --- | --- | 1,19 | down |
| 6202186 | 7167507 | 1293150 | --- | --- | --- | 1,05 | up   |
| 6202258 | 7217747 | 1417493 | --- | --- | --- | 1,36 | up   |
| 6202296 | 7210780 | 1400876 | --- | --- | --- | 1,33 | down |
| 6202345 | 7032083 | 965682  | --- | --- | --- | 1,81 | up   |
| 6202357 | 7069830 | 1055589 | --- | --- | --- | 3,66 | down |
| 6202429 | 7293757 | 1605691 | --- | --- | --- | 1,01 | down |
| 6202430 | 7279793 | 1572538 | --- | --- | --- | 1,04 | up   |
| 6202534 | 7029078 | 958879  | --- | --- | --- | 1,00 | up   |
| 6202639 | 7038610 | 982091  | --- | --- | --- | 2,29 | up   |
| 6202665 | 7213945 | 1407853 | --- | --- | --- | 1,01 | up   |
| 6202775 | 7112225 | 1157602 | --- | --- | --- | 1,49 | down |
| 6202823 | 7150348 | 1251434 | --- | --- | --- | 2,09 | down |
| 6202889 | 7341253 | 1723306 | --- | --- | --- | 1,09 | up   |
| 6202890 | 7344406 | 1731194 | --- | --- | --- | 2,06 | down |
| 6202947 | 7087805 | 1097456 | --- | --- | --- | 2,09 | up   |
| 6203359 | 7297154 | 1614215 | --- | --- | --- | 1,41 | up   |
| 6203436 | 7247228 | 1490512 | --- | --- | --- | 1,16 | down |
| 6203481 | 7266778 | 1538857 | --- | --- | --- | 1,47 | up   |
| 6203573 | 7240569 | 1475379 | --- | --- | --- | 1,03 | up   |
| 6203648 | 7243647 | 1482427 | --- | --- | --- | 1,18 | down |
| 6203865 | 7088164 | 1098490 | --- | --- | --- | 1,21 | up   |
| 6204096 | 7365183 | 1781905 | --- | --- | --- | 2,15 | down |
| 6204142 | 7246548 | 1489158 | --- | --- | --- | 1,00 | down |
| 6204169 | 7297589 | 1615660 | --- | --- | --- | 1,15 | down |
| 6204384 | 7263152 | 1530385 | --- | --- | --- | 1,43 | up   |
| 6204391 | 7307485 | 1641328 | --- | --- | --- | 1,18 | down |
| 6204447 | 7350993 | 1747518 | --- | --- | --- | 1,42 | down |
| 6204565 | 7096589 | 1118504 | --- | --- | --- | 1,41 | down |
| 6204569 | 7031774 | 964724  | --- | --- | --- | 1,38 | up   |
| 6204629 | 7270397 | 1548127 | --- | --- | --- | 1,02 | down |
| 6204632 | 7092549 | 1109176 | --- | --- | --- | 1,11 | up   |
| 6204711 | 7279568 | 1572023 | --- | --- | --- | 1,34 | down |
| 6204825 | 7084716 | 1090121 | --- | --- | --- | 1,97 | down |
| 6204926 | 7326612 | 1687189 | --- | --- | --- | 1,08 | down |
| 6205012 | 7341253 | 1723251 | --- | --- | --- | 1,20 | down |
| 6205034 | 7148978 | 1248494 | --- | --- | --- | 1,38 | down |
| 6205056 | 7364346 | 1780020 | --- | --- | --- | 1,10 | up   |
| 6205136 | 7253272 | 1505699 | --- | --- | --- | 2,24 | up   |
| 6205244 | 7181442 | 1328882 | --- | --- | --- | 1,38 | down |
| 6205261 | 7339379 | 1718335 | --- | --- | --- | 1,19 | up   |
| 6205346 | 7303635 | 1631451 | --- | --- | --- | 1,30 | up   |
| 6205459 | 7368684 | 1791854 | --- | --- | --- | 1,44 | up   |
| 6205531 | 7210445 | 1400145 | --- | --- | --- | 1,10 | up   |
| 6205551 | 7336250 | 1710171 | --- | --- | --- | 1,25 | up   |
| 6205564 | 7284501 | 1583864 | --- | --- | --- | 1,07 | up   |
| 6205631 | 7232340 | 1453523 | --- | --- | --- | 1,28 | down |
| 6205642 | 7112566 | 1158636 | --- | --- | --- | 1,03 | up   |

|         |         |         |     |     |     |      |      |
|---------|---------|---------|-----|-----|-----|------|------|
| 6205855 | 7332970 | 1702554 | --- | --- | --- | 1,22 | up   |
| 6205917 | 7233359 | 1456511 | --- | --- | --- | 1,43 | up   |
| 6205996 | 7340057 | 1720323 | --- | --- | --- | 1,17 | down |
| 6206040 | 7142081 | 1230980 | --- | --- | --- | 1,16 | down |
| 6206128 | 7222221 | 1428062 | --- | --- | --- | 1,13 | down |
| 6206181 | 7041584 | 989463  | --- | --- | --- | 1,71 | up   |
| 6206195 | 7237719 | 1467477 | --- | --- | --- | 1,14 | down |
| 6206198 | 7155116 | 1263388 | --- | --- | --- | 1,11 | down |
| 6206348 | 7240569 | 1475488 | --- | --- | --- | 1,02 | up   |
| 6206503 | 7180732 | 1326719 | --- | --- | --- | 1,30 | down |
| 6206561 | 7336931 | 1711856 | --- | --- | --- | 1,30 | up   |
| 6206650 | 7303722 | 1631715 | --- | --- | --- | 1,97 | up   |
| 6206690 | 7098411 | 1123710 | --- | --- | --- | 1,08 | up   |
| 6206752 | 7189689 | 1349056 | --- | --- | --- | 1,10 | down |
| 6206808 | 7217747 | 1417472 | --- | --- | --- | 1,13 | down |
| 6206920 | 7116103 | 1167605 | --- | --- | --- | 1,84 | up   |
| 6207085 | 7071969 | 1060902 | --- | --- | --- | 1,49 | down |
| 6207093 | 7378637 | 1817830 | --- | --- | --- | 2,24 | down |
| 6207173 | 7263248 | 1530614 | --- | --- | --- | 1,03 | down |
| 6207349 | 7273251 | 1555948 | --- | --- | --- | 1,71 | up   |
| 6207369 | 7162177 | 1280578 | --- | --- | --- | 1,18 | down |
| 6207405 | 7267802 | 1541849 | --- | --- | --- | 1,14 | down |
| 6207481 | 7053874 | 1018337 | --- | --- | --- | 1,36 | down |
| 6207522 | 7297589 | 1615609 | --- | --- | --- | 1,03 | up   |
| 6207526 | 7185315 | 1338590 | --- | --- | --- | 1,05 | down |
| 6207699 | 7363674 | 1778421 | --- | --- | --- | 1,13 | down |
| 6207841 | 7095021 | 1115128 | --- | --- | --- | 1,13 | down |
| 6207853 | 7332059 | 1700730 | --- | --- | --- | 1,05 | up   |
| 6207949 | 7303616 | 1631329 | --- | --- | --- | 1,02 | down |
| 6207959 | 7359551 | 1768624 | --- | --- | --- | 1,12 | down |
| 6207984 | 7301890 | 1626688 | --- | --- | --- | 1,04 | up   |
| 6208026 | 7093936 | 1112479 | --- | --- | --- | 1,13 | up   |
| 6208082 | 7059375 | 1030059 | --- | --- | --- | 1,15 | down |
| 6208141 | 7376566 | 1812880 | --- | --- | --- | 1,19 | down |
| 6208298 | 7099650 | 1126881 | --- | --- | --- | 1,01 | down |
| 6208367 | 7321029 | 1674811 | --- | --- | --- | 1,08 | up   |
| 6208394 | 7132125 | 1206600 | --- | --- | --- | 1,04 | down |
| 6208426 | 7298920 | 1618823 | --- | --- | --- | 1,34 | up   |
| 6208466 | 7234040 | 1458505 | --- | --- | --- | 1,28 | down |
| 6208525 | 7351951 | 1749822 | --- | --- | --- | 1,34 | up   |
| 6208577 | 7112570 | 1158655 | --- | --- | --- | 2,11 | down |
| 6208610 | 7056333 | 1023673 | --- | --- | --- | 1,58 | up   |
| 6208639 | 7098867 | 1124956 | --- | --- | --- | 1,01 | down |
| 6208794 | 7337224 | 1712592 | --- | --- | --- | 1,93 | up   |
| 6208801 | 7050557 | 1010792 | --- | --- | --- | 1,01 | up   |
| 6208885 | 7101258 | 1130571 | --- | --- | --- | 1,22 | up   |
| 6209077 | 7190524 | 1351187 | --- | --- | --- | 1,27 | up   |
| 6209366 | 7334331 | 1705688 | --- | --- | --- | 1,06 | up   |
| 6209392 | 7267802 | 1541741 | --- | --- | --- | 1,31 | up   |
| 6209489 | 7102976 | 1135048 | --- | --- | --- | 1,02 | up   |
| 6209654 | 7131889 | 1206088 | --- | --- | --- | 1,18 | up   |
| 6209713 | 7102369 | 1133411 | --- | --- | --- | 1,53 | up   |
| 6209781 | 7286807 | 1588799 | --- | --- | --- | 1,25 | up   |
| 6209901 | 7107926 | 1146841 | --- | --- | --- | 1,15 | down |
| 6209922 | 7068259 | 1051598 | --- | --- | --- | 1,96 | up   |
| 6209942 | 7308679 | 1644251 | --- | --- | --- | 3,87 | down |



|         |         |         |     |     |     |      |      |
|---------|---------|---------|-----|-----|-----|------|------|
| 6210039 | 7143455 | 1234721 | --- | --- | --- | 1,16 | down |
| 6210224 | 7280743 | 1574493 | --- | --- | --- | 1,88 | up   |
| 6210267 | 7258520 | 1518855 | --- | --- | --- | 1,81 | up   |
| 6210312 | 7146093 | 1240932 | --- | --- | --- | 1,59 | up   |
| 6210387 | 7142853 | 1232903 | --- | --- | --- | 1,04 | up   |
| 6210438 | 7097454 | 1120881 | --- | --- | --- | 1,12 | down |
| 6210492 | 7033672 | 970341  | --- | --- | --- | 2,00 | down |
| 6210495 | 7384509 | 1830731 | --- | --- | --- | 1,04 | down |
| 6210921 | 7319486 | 1670928 | --- | --- | --- | 1,18 | down |
| 6210958 | 7358859 | 1767010 | --- | --- | --- | 1,39 | up   |
| 6210972 | 7070140 | 1056499 | --- | --- | --- | 1,03 | down |
| 6211034 | 7097680 | 1121733 | --- | --- | --- | 1,12 | up   |
| 6211056 | 7363674 | 1778467 | --- | --- | --- | 1,09 | down |
| 6211141 | 7368954 | 1792777 | --- | --- | --- | 1,80 | up   |
| 6211240 | 7279303 | 1571202 | --- | --- | --- | 2,18 | down |
| 6211278 | 7059721 | 1030849 | --- | --- | --- | 1,19 | down |
| 6211315 | 7297274 | 1614663 | --- | --- | --- | 1,73 | down |
| 6211467 | 7234195 | 1458981 | --- | --- | --- | 1,02 | down |
| 6211551 | 7330396 | 1696378 | --- | --- | --- | 1,10 | up   |
| 6211611 | 7090278 | 1104136 | --- | --- | --- | 1,88 | down |
| 6211619 | 7027759 | 956123  | --- | --- | --- | 1,07 | up   |
| 6211629 | 7052813 | 1015893 | --- | --- | --- | 1,05 | down |
| 6211653 | 7360486 | 1770996 | --- | --- | --- | 1,01 | up   |
| 6211689 | 7173863 | 1309712 | --- | --- | --- | 1,91 | up   |
| 6211708 | 7379957 | 1820636 | --- | --- | --- | 1,42 | up   |
| 6211753 | 7380497 | 1821835 | --- | --- | --- | 1,03 | up   |
| 6211788 | 7045663 | 1000082 | --- | --- | --- | 1,35 | down |
| 6211864 | 7270574 | 1548527 | --- | --- | --- | 1,18 | up   |
| 6211869 | 7254040 | 1507575 | --- | --- | --- | 1,23 | down |
| 6211981 | 7131103 | 1204365 | --- | --- | --- | 1,11 | up   |
| 6212243 | 7075096 | 1068574 | --- | --- | --- | 1,06 | down |
| 6212262 | 7338807 | 1716813 | --- | --- | --- | 1,09 | down |
| 6212287 | 7294151 | 1606607 | --- | --- | --- | 1,00 | down |
| 6212312 | 7069142 | 1053877 | --- | --- | --- | 1,01 | down |
| 6212397 | 7286807 | 1588803 | --- | --- | --- | 1,32 | down |
| 6212487 | 7040260 | 986050  | --- | --- | --- | 1,01 | up   |
| 6212525 | 7336727 | 1711284 | --- | --- | --- | 1,38 | down |
| 6212547 | 7060195 | 1031975 | --- | --- | --- | 1,01 | down |
| 6212673 | 7116103 | 1167603 | --- | --- | --- | 2,22 | down |
| 6212706 | 7185622 | 1339206 | --- | --- | --- | 1,05 | up   |
| 6212716 | 7075424 | 1069297 | --- | --- | --- | 1,07 | down |
| 6212720 | 7350489 | 1746112 | --- | --- | --- | 1,28 | down |
| 6212757 | 7321029 | 1674810 | --- | --- | --- | 1,09 | down |
| 6212914 | 7087492 | 1096695 | --- | --- | --- | 1,01 | up   |
| 6213014 | 7093936 | 1112472 | --- | --- | --- | 1,08 | down |
| 6213024 | 7162144 | 1280498 | --- | --- | --- | 1,06 | down |
| 6213121 | 7136977 | 1218808 | --- | --- | --- | 1,12 | up   |
| 6213176 | 7196029 | 1365625 | --- | --- | --- | 1,06 | up   |
| 6213178 | 7340304 | 1720866 | --- | --- | --- | 1,77 | down |
| 6213245 | 7209927 | 1398929 | --- | --- | --- | 1,18 | up   |
| 6213270 | 7273223 | 1555873 | --- | --- | --- | 1,24 | up   |
| 6213272 | 7031576 | 964110  | --- | --- | --- | 1,52 | up   |
| 6213279 | 7068697 | 1052761 | --- | --- | --- | 1,28 | down |
| 6213393 | 7111573 | 1156016 | --- | --- | --- | 1,16 | down |
| 6213433 | 7303616 | 1631371 | --- | --- | --- | 1,17 | up   |
| 6213468 | 7156052 | 1265769 | --- | --- | --- | 1,75 | down |

|         |         |         |     |     |     |      |      |
|---------|---------|---------|-----|-----|-----|------|------|
| 6213528 | 7189669 | 1348968 | --- | --- | --- | 1,20 | up   |
| 6213572 | 7154655 | 1262335 | --- | --- | --- | 1,43 | up   |
| 6213716 | 7229886 | 1447165 | --- | --- | --- | 1,14 | down |
| 6213762 | 7344406 | 1731198 | --- | --- | --- | 1,23 | up   |
| 6213770 | 7092549 | 1109192 | --- | --- | --- | 1,18 | down |
| 6213795 | 7032444 | 966742  | --- | --- | --- | 1,19 | up   |
| 6213797 | 7278957 | 1570392 | --- | --- | --- | 1,33 | up   |
| 6213913 | 7232340 | 1453523 | --- | --- | --- | 1,07 | down |
| 6213918 | 7092549 | 1109130 | --- | --- | --- | 1,19 | up   |
| 6213935 | 7098126 | 1122967 | --- | --- | --- | 1,55 | down |
| 6213953 | 7291054 | 1599397 | --- | --- | --- | 1,02 | up   |
| 6213963 | 7339379 | 1718361 | --- | --- | --- | 1,46 | down |
| 6213967 | 7266532 | 1538297 | --- | --- | --- | 1,35 | up   |
| 6214054 | 7098366 | 1123616 | --- | --- | --- | 1,17 | down |
| 6214143 | 7112566 | 1158631 | --- | --- | --- | 1,28 | down |
| 6214170 | 7049399 | 1008402 | --- | --- | --- | 1,40 | up   |
| 6214232 | 7145669 | 1240003 | --- | --- | --- | 1,02 | up   |
| 6214300 | 7099573 | 1126736 | --- | --- | --- | 1,60 | down |
| 6214363 | 7050710 | 1011174 | --- | --- | --- | 1,09 | down |
| 6214386 | 7305674 | 1636833 | --- | --- | --- | 1,01 | down |
| 6214420 | 7274780 | 1559223 | --- | --- | --- | 1,17 | down |
| 6214489 | 7073854 | 1065621 | --- | --- | --- | 1,50 | up   |
| 6214612 | 7190524 | 1351171 | --- | --- | --- | 1,28 | down |
| 6214960 | 7344406 | 1731205 | --- | --- | --- | 1,20 | up   |
| 6214969 | 7162144 | 1280499 | --- | --- | --- | 1,03 | down |
| 6215060 | 7368729 | 1792054 | --- | --- | --- | 2,32 | up   |
| 6215064 | 7115362 | 1165600 | --- | --- | --- | 1,13 | down |
| 6215106 | 7053874 | 1018306 | --- | --- | --- | 1,07 | down |
| 6215163 | 7297523 | 1615421 | --- | --- | --- | 1,02 | up   |
| 6215216 | 7180732 | 1326735 | --- | --- | --- | 1,07 | up   |
| 6215254 | 7343052 | 1727508 | --- | --- | --- | 1,05 | up   |
| 6215333 | 7088625 | 1099861 | --- | --- | --- | 1,86 | down |
| 6215413 | 7037235 | 978575  | --- | --- | --- | 1,98 | down |
| 6215451 | 7380497 | 1821830 | --- | --- | --- | 1,15 | up   |
| 6215507 | 7373678 | 1805858 | --- | --- | --- | 1,75 | up   |
| 6215710 | 7083030 | 1086266 | --- | --- | --- | 1,16 | up   |
| 6215744 | 7101400 | 1130914 | --- | --- | --- | 1,20 | down |
| 6215767 | 7064134 | 1041480 | --- | --- | --- | 1,40 | up   |
| 6215778 | 7258520 | 1518853 | --- | --- | --- | 1,25 | up   |
| 6215782 | 7323545 | 1679929 | --- | --- | --- | 1,12 | up   |
| 6215858 | 7184981 | 1337844 | --- | --- | --- | 1,20 | up   |
| 6215859 | 7154655 | 1262329 | --- | --- | --- | 2,05 | up   |
| 6215867 | 7052385 | 1014809 | --- | --- | --- | 1,08 | up   |
| 6215897 | 7325674 | 1685231 | --- | --- | --- | 1,04 | up   |
| 6215900 | 7070836 | 1058355 | --- | --- | --- | 1,24 | up   |
| 6215940 | 7337845 | 1714352 | --- | --- | --- | 1,12 | up   |
| 6215951 | 7193056 | 1358261 | --- | --- | --- | 1,13 | up   |
| 6216020 | 7148271 | 1246644 | --- | --- | --- | 1,18 | up   |
| 6216037 | 7068259 | 1051628 | --- | --- | --- | 1,38 | up   |
| 6216065 | 7186305 | 1341002 | --- | --- | --- | 1,91 | down |
| 6216165 | 7249503 | 1496186 | --- | --- | --- | 1,08 | up   |
| 6216228 | 7321414 | 1675631 | --- | --- | --- | 1,65 | up   |
| 6216256 | 7235069 | 1460984 | --- | --- | --- | 1,06 | up   |
| 6216257 | 7049399 | 1008390 | --- | --- | --- | 1,27 | up   |
| 6216430 | 7280743 | 1574521 | --- | --- | --- | 1,20 | down |
| 6216439 | 7180861 | 1327224 | --- | --- | --- | 1,28 | up   |

|         |         |         |     |     |     |      |      |
|---------|---------|---------|-----|-----|-----|------|------|
| 6216600 | 7059429 | 1030243 | --- | --- | --- | 1,22 | down |
| 6216820 | 7033616 | 970211  | --- | --- | --- | 1,23 | down |
| 6217017 | 7322388 | 1677320 | --- | --- | --- | 1,16 | up   |
| 6217075 | 7363674 | 1778440 | --- | --- | --- | 1,43 | up   |
| 6217216 | 7178060 | 1320153 | --- | --- | --- | 1,14 | down |
| 6217327 | 7142416 | 1231800 | --- | --- | --- | 1,57 | up   |
| 6217366 | 7176456 | 1315831 | --- | --- | --- | 1,24 | down |
| 6217411 | 7200545 | 1376932 | --- | --- | --- | 1,16 | up   |
| 6217435 | 7036412 | 976867  | --- | --- | --- | 1,49 | down |
| 6217451 | 7189689 | 1349059 | --- | --- | --- | 1,08 | up   |
| 6217836 | 7340304 | 1720852 | --- | --- | --- | 2,30 | up   |
| 6217855 | 7273223 | 1555878 | --- | --- | --- | 1,48 | down |
| 6217984 | 7337224 | 1712560 | --- | --- | --- | 1,03 | up   |
| 6218048 | 7239939 | 1473799 | --- | --- | --- | 1,32 | up   |
| 6218100 | 7038669 | 982180  | --- | --- | --- | 1,46 | up   |
| 6218115 | 7196233 | 1366098 | --- | --- | --- | 1,14 | up   |
| 6218277 | 7373678 | 1805870 | --- | --- | --- | 1,22 | down |
| 6218312 | 7256191 | 1512886 | --- | --- | --- | 1,07 | down |
| 6218365 | 7097525 | 1121055 | --- | --- | --- | 1,27 | down |
| 6218494 | 7100257 | 1128260 | --- | --- | --- | 1,01 | down |
| 6218502 | 7103811 | 1137059 | --- | --- | --- | 1,48 | down |
| 6218545 | 7132834 | 1208324 | --- | --- | --- | 1,01 | down |
| 6218628 | 7341646 | 1724198 | --- | --- | --- | 2,48 | down |
| 6218912 | 7217650 | 1417203 | --- | --- | --- | 1,07 | up   |
| 6218924 | 7107066 | 1144783 | --- | --- | --- | 1,32 | down |
| 6219052 | 7249503 | 1496180 | --- | --- | --- | 1,12 | up   |
| 6219107 | 7367946 | 1788964 | --- | --- | --- | 1,07 | down |
| 6219184 | 7097525 | 1121045 | --- | --- | --- | 1,87 | down |
| 6219207 | 7115880 | 1166815 | --- | --- | --- | 1,27 | down |
| 6219244 | 7295410 | 1609684 | --- | --- | --- | 1,49 | down |
| 6219268 | 7039271 | 983714  | --- | --- | --- | 1,44 | down |
| 6219354 | 7344702 | 1732141 | --- | --- | --- | 2,06 | down |
| 6219409 | 7316644 | 1664034 | --- | --- | --- | 1,11 | down |
| 6219429 | 7060851 | 1033356 | --- | --- | --- | 1,06 | down |
| 6219445 | 7237719 | 1467488 | --- | --- | --- | 1,17 | down |
| 6219452 | 7174149 | 1310512 | --- | --- | --- | 1,03 | down |
| 6219515 | 7286807 | 1588809 | --- | --- | --- | 1,47 | up   |
| 6219532 | 7156052 | 1265772 | --- | --- | --- | 1,01 | up   |
| 6219582 | 7030224 | 961134  | --- | --- | --- | 1,21 | up   |
| 6219871 | 7339387 | 1718389 | --- | --- | --- | 1,10 | down |
| 6219948 | 7235323 | 1461559 | --- | --- | --- | 1,21 | up   |
| 6220045 | 7264274 | 1533174 | --- | --- | --- | 1,72 | down |
| 6220066 | 7190844 | 1352141 | --- | --- | --- | 1,03 | up   |
| 6220067 | 7292517 | 1602548 | --- | --- | --- | 1,14 | down |
| 6220309 | 7178060 | 1320184 | --- | --- | --- | 1,12 | up   |
| 6220383 | 7094158 | 1112984 | --- | --- | --- | 2,80 | down |
| 6220414 | 7165954 | 1288769 | --- | --- | --- | 1,10 | up   |
| 6220434 | 7264797 | 1534420 | --- | --- | --- | 1,29 | down |
| 6220537 | 7290585 | 1598181 | --- | --- | --- | 1,13 | down |
| 6220564 | 7101400 | 1130912 | --- | --- | --- | 1,70 | up   |
| 6220665 | 7185622 | 1339212 | --- | --- | --- | 1,12 | up   |
| 6220670 | 7119179 | 1174971 | --- | --- | --- | 1,51 | up   |
| 6220674 | 7033504 | 969853  | --- | --- | --- | 1,21 | down |
| 6220694 | 7031774 | 964662  | --- | --- | --- | 1,12 | up   |
| 6220727 | 7090278 | 1104135 | --- | --- | --- | 1,28 | down |
| 6220754 | 7107926 | 1146847 | --- | --- | --- | 1,02 | up   |

|         |         |         |     |     |     |      |      |
|---------|---------|---------|-----|-----|-----|------|------|
| 6220757 | 7225553 | 1435984 | --- | --- | --- | 4,13 | down |
| 6220795 | 7180861 | 1327224 | --- | --- | --- | 1,21 | down |
| 6220797 | 7179785 | 1324498 | --- | --- | --- | 1,05 | up   |
| 6220829 | 7137646 | 1220438 | --- | --- | --- | 1,16 | down |
| 6220834 | 7344838 | 1732458 | --- | --- | --- | 2,32 | down |
| 6220853 | 7199476 | 1374543 | --- | --- | --- | 1,03 | down |
| 6221057 | 7226241 | 1437810 | --- | --- | --- | 1,01 | up   |
| 6221151 | 7181016 | 1327793 | --- | --- | --- | 1,16 | down |
| 6221194 | 7156061 | 1265832 | --- | --- | --- | 1,04 | up   |
| 6221438 | 7343122 | 1727735 | --- | --- | --- | 1,09 | up   |
| 6221463 | 7350993 | 1747517 | --- | --- | --- | 1,13 | up   |
| 6221504 | 7050726 | 1011258 | --- | --- | --- | 1,38 | down |
| 6221664 | 7155882 | 1265361 | --- | --- | --- | 1,24 | up   |
| 6221668 | 7279303 | 1571206 | --- | --- | --- | 2,49 | down |
| 6221693 | 7225213 | 1435125 | --- | --- | --- | 2,05 | down |
| 6221750 | 7330078 | 1695476 | --- | --- | --- | 1,31 | down |
| 6221796 | 7213908 | 1407652 | --- | --- | --- | 1,16 | up   |
| 6221888 | 7108345 | 1148076 | --- | --- | --- | 1,05 | up   |
| 6221921 | 7139708 | 1225051 | --- | --- | --- | 1,60 | down |
| 6222148 | 7247848 | 1492066 | --- | --- | --- | 1,05 | down |
| 6222191 | 7271213 | 1550645 | --- | --- | --- | 1,81 | up   |
| 6222260 | 7364346 | 1779982 | --- | --- | --- | 1,18 | down |
| 6222346 | 7384073 | 1829457 | --- | --- | --- | 1,05 | down |
| 6222451 | 7274780 | 1559240 | --- | --- | --- | 1,22 | down |
| 6222486 | 7141421 | 1229480 | --- | --- | --- | 1,16 | up   |
| 6222568 | 7089381 | 1102064 | --- | --- | --- | 1,14 | down |
| 6222670 | 7129688 | 1200557 | --- | --- | --- | 1,22 | up   |
| 6222687 | 7249503 | 1496194 | --- | --- | --- | 1,21 | down |
| 6222958 | 7166439 | 1290104 | --- | --- | --- | 2,26 | down |
| 6223040 | 7297274 | 1614664 | --- | --- | --- | 2,38 | down |
| 6223094 | 7143971 | 1235931 | --- | --- | --- | 1,09 | up   |
| 6223104 | 7043452 | 993841  | --- | --- | --- | 1,42 | down |
| 6223128 | 7342959 | 1727350 | --- | --- | --- | 1,55 | up   |
| 6223328 | 7364948 | 1781228 | --- | --- | --- | 1,31 | up   |
| 6223367 | 7319937 | 1672311 | --- | --- | --- | 1,04 | down |
| 6223459 | 7152038 | 1255395 | --- | --- | --- | 1,01 | up   |
| 6223542 | 7276762 | 1564484 | --- | --- | --- | 1,21 | down |
| 6223656 | 7069142 | 1053875 | --- | --- | --- | 2,25 | down |
| 6223677 | 7343868 | 1729854 | --- | --- | --- | 2,20 | down |
| 6223757 | 7307424 | 1641135 | --- | --- | --- | 1,00 | down |
| 6223824 | 7101400 | 1130898 | --- | --- | --- | 1,02 | up   |
| 6223912 | 7359551 | 1768626 | --- | --- | --- | 1,06 | up   |
| 6224009 | 7083021 | 1086220 | --- | --- | --- | 1,61 | up   |
| 6224217 | 7038316 | 981456  | --- | --- | --- | 1,01 | up   |
| 6224238 | 7083030 | 1086245 | --- | --- | --- | 1,77 | down |
| 6224327 | 7369400 | 1793984 | --- | --- | --- | 2,32 | up   |
| 6224340 | 7180861 | 1327208 | --- | --- | --- | 1,58 | down |
| 6224406 | 7339732 | 1719213 | --- | --- | --- | 1,12 | down |
| 6224476 | 7185315 | 1338604 | --- | --- | --- | 1,12 | down |
| 6224512 | 7099573 | 1126732 | --- | --- | --- | 1,12 | down |
| 6224533 | 7040260 | 986098  | --- | --- | --- | 1,28 | down |
| 6224642 | 7320337 | 1673338 | --- | --- | --- | 1,62 | up   |
| 6224687 | 7249737 | 1496747 | --- | --- | --- | 1,55 | up   |
| 6224828 | 7211343 | 1401978 | --- | --- | --- | 1,45 | up   |
| 6224865 | 7076236 | 1071185 | --- | --- | --- | 1,19 | up   |
| 6224896 | 7031774 | 964764  | --- | --- | --- | 1,25 | down |

|         |         |         |     |     |     |      |      |
|---------|---------|---------|-----|-----|-----|------|------|
| 6224994 | 7341002 | 1722533 | --- | --- | --- | 1,55 | up   |
| 6225077 | 7236395 | 1464344 | --- | --- | --- | 1,84 | up   |
| 6225106 | 7249503 | 1496198 | --- | --- | --- | 1,12 | down |
| 6225183 | 7315571 | 1661011 | --- | --- | --- | 2,04 | up   |
| 6225238 | 7131360 | 1204974 | --- | --- | --- | 1,05 | down |
| 6225310 | 7339732 | 1719192 | --- | --- | --- | 1,05 | down |
| 6225319 | 7108345 | 1148080 | --- | --- | --- | 1,42 | up   |
| 6225329 | 7249503 | 1496238 | --- | --- | --- | 1,11 | down |
| 6225363 | 7331829 | 1700173 | --- | --- | --- | 2,43 | up   |
| 6225485 | 7224035 | 1432400 | --- | --- | --- | 3,55 | up   |
| 6225512 | 7107926 | 1146845 | --- | --- | --- | 1,18 | down |
| 6225617 | 7222221 | 1428063 | --- | --- | --- | 1,21 | down |
| 6225833 | 7210263 | 1399756 | --- | --- | --- | 1,11 | down |
| 6225864 | 7350237 | 1745524 | --- | --- | --- | 1,96 | up   |
| 6225937 | 7243363 | 1481615 | --- | --- | --- | 1,08 | down |
| 6226095 | 7232029 | 1452726 | --- | --- | --- | 1,56 | up   |
| 6226410 | 7239752 | 1473148 | --- | --- | --- | 1,19 | up   |
| 6226420 | 7349944 | 1744912 | --- | --- | --- | 2,28 | up   |
| 6226448 | 7345465 | 1733859 | --- | --- | --- | 1,67 | up   |
| 6226462 | 7202550 | 1381619 | --- | --- | --- | 1,82 | up   |
| 6226489 | 7273223 | 1555892 | --- | --- | --- | 1,17 | up   |
| 6226573 | 7167883 | 1294104 | --- | --- | --- | 1,23 | up   |
| 6226579 | 7292154 | 1601690 | --- | --- | --- | 1,17 | down |
| 6226590 | 7088135 | 1098419 | --- | --- | --- | 1,95 | down |
| 6226607 | 7332970 | 1702513 | --- | --- | --- | 2,10 | up   |
| 6226649 | 7170845 | 1301911 | --- | --- | --- | 1,00 | up   |
| 6226687 | 7248790 | 1494515 | --- | --- | --- | 1,04 | down |
| 6226732 | 7039223 | 983555  | --- | --- | --- | 1,29 | up   |
| 6226832 | 7353441 | 1753342 | --- | --- | --- | 1,23 | up   |
| 6226852 | 7252051 | 1502510 | --- | --- | --- | 1,33 | down |
| 6226858 | 7103811 | 1137064 | --- | --- | --- | 1,90 | up   |
| 6226864 | 7319937 | 1672283 | --- | --- | --- | 1,24 | down |
| 6227245 | 7330396 | 1696379 | --- | --- | --- | 1,91 | down |
| 6227261 | 7365183 | 1781905 | --- | --- | --- | 1,12 | up   |
| 6227262 | 7243253 | 1481232 | --- | --- | --- | 1,08 | up   |
| 6227284 | 7075445 | 1069347 | --- | --- | --- | 1,40 | down |
| 6227344 | 7229886 | 1447151 | --- | --- | --- | 1,03 | up   |
| 6227365 | 7358859 | 1766997 | --- | --- | --- | 1,06 | up   |
| 6227438 | 7238252 | 1469220 | --- | --- | --- | 1,03 | up   |
| 6227442 | 7031460 | 963824  | --- | --- | --- | 1,27 | up   |
| 6227504 | 7172373 | 1305584 | --- | --- | --- | 1,39 | up   |
| 6227529 | 7231203 | 1450440 | --- | --- | --- | 1,18 | up   |
| 6227610 | 7263152 | 1530383 | --- | --- | --- | 1,32 | down |
| 6227666 | 7111361 | 1155602 | --- | --- | --- | 1,18 | down |
| 6227678 | 7207069 | 1392010 | --- | --- | --- | 1,09 | up   |
| 6227728 | 7297589 | 1615647 | --- | --- | --- | 1,41 | down |
| 6227840 | 7064468 | 1042368 | --- | --- | --- | 1,48 | up   |
| 6227870 | 7332970 | 1702533 | --- | --- | --- | 1,05 | up   |
| 6227876 | 7120690 | 1179048 | --- | --- | --- | 1,17 | down |
| 6227893 | 7287222 | 1589715 | --- | --- | --- | 1,54 | up   |
| 6228025 | 7338040 | 1714954 | --- | --- | --- | 1,20 | down |
| 6228177 | 7145669 | 1240002 | --- | --- | --- | 1,12 | up   |
| 6228178 | 7293234 | 1604356 | --- | --- | --- | 1,89 | down |
| 6228179 | 7340838 | 1722072 | --- | --- | --- | 1,15 | up   |
| 6228186 | 7328833 | 1692793 | --- | --- | --- | 1,02 | down |
| 6228192 | 7167507 | 1293143 | --- | --- | --- | 1,14 | up   |

|         |         |         |     |     |     |      |      |
|---------|---------|---------|-----|-----|-----|------|------|
| 6228197 | 7305674 | 1636826 | --- | --- | --- | 1,19 | down |
| 6228199 | 7139708 | 1225051 | --- | --- | --- | 1,31 | down |
| 6228240 | 7364346 | 1780015 | --- | --- | --- | 1,05 | down |
| 6228250 | 7297589 | 1615687 | --- | --- | --- | 1,61 | down |
| 6228336 | 7251608 | 1501464 | --- | --- | --- | 1,06 | up   |
| 6228347 | 7217679 | 1417291 | --- | --- | --- | 1,45 | down |
| 6228352 | 7043379 | 993641  | --- | --- | --- | 1,26 | up   |
| 6228397 | 7060851 | 1033408 | --- | --- | --- | 1,30 | up   |
| 6228423 | 7092549 | 1109125 | --- | --- | --- | 1,03 | down |
| 6228519 | 7228848 | 1444755 | --- | --- | --- | 1,03 | up   |
| 6228520 | 7032083 | 965694  | --- | --- | --- | 1,49 | up   |
| 6228620 | 7101400 | 1130897 | --- | --- | --- | 1,28 | up   |
| 6228625 | 7088164 | 1098486 | --- | --- | --- | 1,54 | down |
| 6228708 | 7350489 | 1746112 | --- | --- | --- | 1,02 | down |
| 6228726 | 7243653 | 1482554 | --- | --- | --- | 1,31 | up   |
| 6228812 | 7320337 | 1673321 | --- | --- | --- | 1,08 | down |
| 6228818 | 7359551 | 1768640 | --- | --- | --- | 1,04 | down |
| 6228819 | 7213945 | 1407863 | --- | --- | --- | 1,06 | down |
| 6228826 | 7059020 | 1029343 | --- | --- | --- | 1,01 | up   |
| 6228862 | 7284153 | 1583019 | --- | --- | --- | 1,18 | up   |
| 6228997 | 7374842 | 1808991 | --- | --- | --- | 1,14 | down |
| 6229033 | 7236492 | 1464552 | --- | --- | --- | 1,90 | up   |
| 6229048 | 7132024 | 1206338 | --- | --- | --- | 2,01 | up   |
| 6229077 | 7281950 | 1577787 | --- | --- | --- | 1,75 | up   |
| 6229092 | 7143455 | 1234719 | --- | --- | --- | 1,23 | up   |
| 6229158 | 7247229 | 1490546 | --- | --- | --- | 1,10 | down |
| 6229333 | 7330238 | 1695926 | --- | --- | --- | 1,02 | up   |
| 6229339 | 7299512 | 1620552 | --- | --- | --- | 1,08 | down |
| 6229351 | 7249503 | 1496173 | --- | --- | --- | 1,42 | up   |
| 6229382 | 7331413 | 1699129 | --- | --- | --- | 1,87 | down |
| 6229526 | 7213908 | 1407648 | --- | --- | --- | 1,18 | up   |
| 6229549 | 7117158 | 1170017 | --- | --- | --- | 1,48 | down |
| 6229611 | 7367971 | 1789108 | --- | --- | --- | 1,36 | up   |
| 6229620 | 7098366 | 1123608 | --- | --- | --- | 1,03 | up   |
| 6229643 | 7049399 | 1008367 | --- | --- | --- | 1,04 | down |
| 6229683 | 7376820 | 1813403 | --- | --- | --- | 2,00 | up   |
| 6229706 | 7357815 | 1764167 | --- | --- | --- | 1,17 | down |
| 6229744 | 7264808 | 1534474 | --- | --- | --- | 1,29 | up   |
| 6229932 | 7249503 | 1496221 | --- | --- | --- | 1,36 | down |
| 6229949 | 7165954 | 1288770 | --- | --- | --- | 1,14 | down |
| 6229950 | 7166439 | 1290095 | --- | --- | --- | 1,70 | up   |
| 6229980 | 7043535 | 994145  | --- | --- | --- | 1,06 | down |
| 6230036 | 7331719 | 1699921 | --- | --- | --- | 1,41 | up   |
| 6230120 | 7279793 | 1572532 | --- | --- | --- | 1,25 | up   |
| 6230150 | 7343122 | 1727722 | --- | --- | --- | 1,21 | up   |
| 6230172 | 7274892 | 1559575 | --- | --- | --- | 1,08 | up   |
| 6230181 | 7059502 | 1030381 | --- | --- | --- | 2,03 | down |
| 6230222 | 7112225 | 1157604 | --- | --- | --- | 1,00 | up   |
| 6230228 | 7319486 | 1670927 | --- | --- | --- | 1,58 | up   |
| 6230258 | 7067670 | 1050316 | --- | --- | --- | 1,93 | up   |
| 6230269 | 7067614 | 1050201 | --- | --- | --- | 1,22 | up   |
| 6230337 | 7234407 | 1459361 | --- | --- | --- | 1,07 | up   |
| 6230359 | 7226241 | 1437787 | --- | --- | --- | 1,03 | up   |
| 6230386 | 7195903 | 1365327 | --- | --- | --- | 2,34 | up   |
| 6230538 | 7060851 | 1033421 | --- | --- | --- | 1,01 | down |
| 6230643 | 7323545 | 1679920 | --- | --- | --- | 1,18 | down |

|         |         |         |     |     |     |      |      |
|---------|---------|---------|-----|-----|-----|------|------|
| 6230842 | 7052385 | 1014777 | --- | --- | --- | 1,03 | up   |
| 6230847 | 7101400 | 1130922 | --- | --- | --- | 1,49 | down |
| 6230918 | 7177180 | 1317778 | --- | --- | --- | 2,82 | down |
| 6231024 | 7299204 | 1619538 | --- | --- | --- | 1,06 | up   |
| 6231055 | 7233440 | 1456827 | --- | --- | --- | 1,25 | down |
| 6231106 | 7078273 | 1075819 | --- | --- | --- | 1,14 | down |
| 6231124 | 7272110 | 1553031 | --- | --- | --- | 1,35 | up   |
| 6231144 | 7070616 | 1057778 | --- | --- | --- | 1,42 | down |
| 6231222 | 7141421 | 1229479 | --- | --- | --- | 1,10 | down |
| 6231248 | 7193513 | 1359467 | --- | --- | --- | 2,01 | down |
| 6231277 | 7299512 | 1620546 | --- | --- | --- | 1,26 | down |
| 6231320 | 7041609 | 989587  | --- | --- | --- | 1,41 | down |
| 6231321 | 7199476 | 1374522 | --- | --- | --- | 1,15 | down |
| 6231392 | 7061703 | 1035736 | --- | --- | --- | 1,46 | down |
| 6231421 | 7234040 | 1458505 | --- | --- | --- | 1,01 | down |
| 6231434 | 7247954 | 1492398 | --- | --- | --- | 1,54 | down |
| 6231495 | 7116103 | 1167598 | --- | --- | --- | 2,31 | up   |
| 6231510 | 7115362 | 1165598 | --- | --- | --- | 1,20 | down |
| 6231566 | 7056333 | 1023712 | --- | --- | --- | 1,24 | down |
| 6231706 | 7141061 | 1228643 | --- | --- | --- | 1,07 | down |
| 6231730 | 7267953 | 1542240 | --- | --- | --- | 1,30 | up   |
| 6231778 | 7384073 | 1829460 | --- | --- | --- | 2,27 | down |
| 6231879 | 7069142 | 1053876 | --- | --- | --- | 1,04 | down |
| 6231988 | 7293757 | 1605675 | --- | --- | --- | 1,09 | up   |
| 6232064 | 7212735 | 1405025 | --- | --- | --- | 1,19 | down |
| 6232124 | 7234040 | 1458500 | --- | --- | --- | 2,03 | up   |
| 6232142 | 7137646 | 1220437 | --- | --- | --- | 1,07 | down |
| 6232240 | 7132125 | 1206613 | --- | --- | --- | 1,13 | up   |
| 6232248 | 7139709 | 1225072 | --- | --- | --- | 1,04 | down |
| 6232259 | 7038969 | 982979  | --- | --- | --- | 1,14 | down |
| 6232442 | 7167507 | 1293121 | --- | --- | --- | 1,12 | down |
| 6232491 | 7169599 | 1298443 | --- | --- | --- | 1,39 | up   |
| 6232719 | 7312621 | 1653461 | --- | --- | --- | 1,15 | down |
| 6232735 | 7267802 | 1541816 | --- | --- | --- | 1,11 | down |
| 6232824 | 7326612 | 1687195 | --- | --- | --- | 1,73 | up   |
| 6232836 | 7373038 | 1804286 | --- | --- | --- | 1,09 | down |
| 6233056 | 7247228 | 1490521 | --- | --- | --- | 1,33 | up   |
| 6233134 | 7131360 | 1204968 | --- | --- | --- | 1,29 | down |
| 6233304 | 7331297 | 1698818 | --- | --- | --- | 1,20 | down |
| 6233306 | 7329513 | 1694254 | --- | --- | --- | 1,02 | up   |
| 6233315 | 7092549 | 1109133 | --- | --- | --- | 1,01 | up   |
| 6233509 | 7025652 | 950254  | --- | --- | --- | 1,11 | up   |
| 6233526 | 7033504 | 969861  | --- | --- | --- | 1,02 | up   |
| 6233566 | 7240569 | 1475491 | --- | --- | --- | 1,04 | up   |
| 6233648 | 7180732 | 1326719 | --- | --- | --- | 1,01 | down |
| 6233844 | 7274892 | 1559569 | --- | --- | --- | 1,42 | up   |
| 6233882 | 7071264 | 1059363 | --- | --- | --- | 1,62 | down |
| 6233893 | 7059375 | 1030055 | --- | --- | --- | 1,02 | down |
| 6233917 | 7330181 | 1695694 | --- | --- | --- | 1,22 | up   |
| 6233932 | 7326612 | 1687202 | --- | --- | --- | 1,21 | down |
| 6234049 | 7072765 | 1062740 | --- | --- | --- | 1,39 | down |
| 6234160 | 7143455 | 1234714 | --- | --- | --- | 1,32 | up   |
| 6234193 | 7069142 | 1053876 | --- | --- | --- | 1,53 | up   |
| 6234348 | 7209927 | 1398923 | --- | --- | --- | 1,07 | down |
| 6234447 | 7319937 | 1672287 | --- | --- | --- | 1,47 | down |
| 6234509 | 7319937 | 1672282 | --- | --- | --- | 1,02 | up   |

|         |         |         |     |     |     |      |      |
|---------|---------|---------|-----|-----|-----|------|------|
| 6234578 | 7094158 | 1112982 | --- | --- | --- | 1,35 | up   |
| 6234581 | 7086966 | 1095272 | --- | --- | --- | 1,07 | up   |
| 6234604 | 7225213 | 1435124 | --- | --- | --- | 1,07 | up   |
| 6234636 | 7240569 | 1475497 | --- | --- | --- | 1,34 | up   |
| 6234677 | 7330396 | 1696342 | --- | --- | --- | 1,28 | down |
| 6234742 | 7186464 | 1341375 | --- | --- | --- | 1,96 | down |
| 6234848 | 7189184 | 1347597 | --- | --- | --- | 1,01 | up   |
| 6234869 | 7284153 | 1583011 | --- | --- | --- | 1,85 | down |
| 6234933 | 7226241 | 1437808 | --- | --- | --- | 1,15 | up   |
| 6235013 | 7341002 | 1722535 | --- | --- | --- | 1,73 | up   |
| 6235128 | 7068259 | 1051662 | --- | --- | --- | 1,31 | down |
| 6235148 | 7231152 | 1450255 | --- | --- | --- | 1,09 | up   |
| 6235182 | 7217650 | 1417181 | --- | --- | --- | 1,50 | up   |
| 6235254 | 7108345 | 1148080 | --- | --- | --- | 1,07 | up   |
| 6235402 | 7266706 | 1538750 | --- | --- | --- | 1,71 | up   |
| 6235634 | 7141061 | 1228678 | --- | --- | --- | 1,22 | up   |
| 6235655 | 7061003 | 1033924 | --- | --- | --- | 1,01 | down |
| 6235665 | 7364346 | 1779972 | --- | --- | --- | 1,03 | up   |
| 6235684 | 7188829 | 1346669 | --- | --- | --- | 1,41 | down |
| 6235768 | 7045525 | 999740  | --- | --- | --- | 1,05 | down |
| 6235771 | 7369712 | 1794828 | --- | --- | --- | 1,07 | up   |
| 6235791 | 7236395 | 1464314 | --- | --- | --- | 2,78 | up   |
| 6235959 | 7229886 | 1447156 | --- | --- | --- | 1,33 | up   |
| 6235981 | 7249503 | 1496218 | --- | --- | --- | 1,07 | down |
| 6236042 | 7380019 | 1820824 | --- | --- | --- | 1,11 | up   |
| 6236069 | 7027759 | 956132  | --- | --- | --- | 1,23 | down |
| 6236084 | 7180687 | 1326629 | --- | --- | --- | 1,13 | down |
| 6236172 | 7027797 | 956287  | --- | --- | --- | 1,27 | up   |
| 6236300 | 7322260 | 1677066 | --- | --- | --- | 1,13 | up   |
| 6236380 | 7245874 | 1487590 | --- | --- | --- | 1,00 | up   |
| 6236400 | 7247334 | 1490819 | --- | --- | --- | 1,12 | down |
| 6236590 | 7122486 | 1183418 | --- | --- | --- | 1,34 | down |
| 6236614 | 7336931 | 1711872 | --- | --- | --- | 1,51 | down |
| 6236623 | 7239939 | 1473790 | --- | --- | --- | 1,05 | down |
| 6236687 | 7150348 | 1251398 | --- | --- | --- | 1,08 | down |
| 6236814 | 7041609 | 989573  | --- | --- | --- | 1,00 | down |
| 6236936 | 7180721 | 1326699 | --- | --- | --- | 1,10 | down |
| 6236978 | 7322020 | 1676651 | --- | --- | --- | 1,07 | down |
| 6237011 | 7040260 | 986046  | --- | --- | --- | 1,19 | up   |
| 6237027 | 7176409 | 1315673 | --- | --- | --- | 1,37 | up   |
| 6237052 | 7068143 | 1051289 | --- | --- | --- | 1,45 | up   |
| 6237100 | 7229909 | 1447246 | --- | --- | --- | 1,08 | down |
| 6237142 | 7307721 | 1641999 | --- | --- | --- | 1,83 | up   |
| 6237209 | 7129841 | 1200831 | --- | --- | --- | 1,10 | up   |
| 6237241 | 7196029 | 1365638 | --- | --- | --- | 1,00 | down |
| 6237245 | 7199476 | 1374539 | --- | --- | --- | 1,18 | down |
| 6237268 | 7330727 | 1697155 | --- | --- | --- | 1,36 | down |
| 6237321 | 7328695 | 1692382 | --- | --- | --- | 1,53 | down |
| 6237331 | 7343122 | 1727730 | --- | --- | --- | 1,34 | up   |
| 6237392 | 7096859 | 1119317 | --- | --- | --- | 1,15 | up   |
| 6237462 | 7374790 | 1808782 | --- | --- | --- | 1,23 | down |
| 6237710 | 7247228 | 1490513 | --- | --- | --- | 1,14 | down |
| 6237815 | 7337224 | 1712613 | --- | --- | --- | 1,13 | down |
| 6237830 | 7319144 | 1670095 | --- | --- | --- | 1,01 | down |
| 6237844 | 7033672 | 970364  | --- | --- | --- | 1,49 | up   |
| 6237847 | 7344530 | 1731576 | --- | --- | --- | 1,02 | down |



|         |         |         |     |     |     |      |      |
|---------|---------|---------|-----|-----|-----|------|------|
| 6237980 | 7303616 | 1631366 | --- | --- | --- | 1,23 | down |
| 6237989 | 7162177 | 1280576 | --- | --- | --- | 1,55 | down |
| 6238057 | 7167507 | 1293153 | --- | --- | --- | 1,02 | down |
| 6238084 | 7037764 | 980040  | --- | --- | --- | 1,12 | up   |
| 6238087 | 7033504 | 969843  | --- | --- | --- | 1,07 | down |
| 6238141 | 7155286 | 1263909 | --- | --- | --- | 2,72 | up   |
| 6238280 | 7080106 | 1079715 | --- | --- | --- | 1,18 | down |
| 6238336 | 7368729 | 1792055 | --- | --- | --- | 1,02 | down |
| 6238458 | 7083030 | 1086253 | --- | --- | --- | 1,60 | up   |
| 6238466 | 7143904 | 1235801 | --- | --- | --- | 1,04 | up   |
| 6238549 | 7062436 | 1037699 | --- | --- | --- | 1,01 | up   |
| 6238580 | 7274780 | 1559229 | --- | --- | --- | 1,67 | down |
| 6238586 | 7249503 | 1496238 | --- | --- | --- | 1,23 | down |
| 6238684 | 7297483 | 1615281 | --- | --- | --- | 1,14 | up   |
| 6238781 | 7330238 | 1695953 | --- | --- | --- | 1,15 | down |
| 6238812 | 7064468 | 1042369 | --- | --- | --- | 1,03 | up   |
| 6239091 | 7108300 | 1147899 | --- | --- | --- | 1,02 | down |
| 6239392 | 7101400 | 1130917 | --- | --- | --- | 1,32 | down |
| 6239465 | 7068504 | 1052165 | --- | --- | --- | 1,47 | down |
| 6239571 | 7037764 | 980098  | --- | --- | --- | 1,20 | down |
| 6239581 | 7330396 | 1696346 | --- | --- | --- | 1,16 | up   |
| 6239616 | 7384179 | 1829780 | --- | --- | --- | 1,00 | down |
| 6239667 | 7210713 | 1400753 | --- | --- | --- | 1,07 | down |
| 6239714 | 7056333 | 1023709 | --- | --- | --- | 1,10 | down |
| 6239811 | 7086966 | 1095266 | --- | --- | --- | 1,15 | up   |
| 6239943 | 7188681 | 1346287 | --- | --- | --- | 1,07 | up   |
| 6239963 | 7244288 | 1484114 | --- | --- | --- | 1,53 | down |
| 6240006 | 7233921 | 1458158 | --- | --- | --- | 1,72 | down |
| 6240291 | 7279568 | 1572017 | --- | --- | --- | 1,61 | down |
| 6240301 | 7031576 | 964110  | --- | --- | --- | 1,11 | down |
| 6240714 | 7132834 | 1208324 | --- | --- | --- | 1,23 | down |
| 6240883 | 7119556 | 1176077 | --- | --- | --- | 1,15 | up   |
| 6241072 | 7086664 | 1094275 | --- | --- | --- | 1,20 | up   |
| 6241168 | 7112562 | 1158601 | --- | --- | --- | 1,46 | up   |
| 6241266 | 7096924 | 1119623 | --- | --- | --- | 1,16 | up   |
| 6241285 | 7378997 | 1818635 | --- | --- | --- | 1,03 | down |
| 6241342 | 7261766 | 1527159 | --- | --- | --- | 5,35 | up   |
| 6241355 | 7238115 | 1468642 | --- | --- | --- | 1,05 | down |
| 6241370 | 7027759 | 956133  | --- | --- | --- | 1,01 | down |
| 6241558 | 7247229 | 1490536 | --- | --- | --- | 1,10 | up   |
| 6241596 | 7199476 | 1374555 | --- | --- | --- | 1,01 | down |
| 6241660 | 7182713 | 1332531 | --- | --- | --- | 1,11 | up   |
| 6241699 | 7312903 | 1654102 | --- | --- | --- | 2,08 | down |
| 6241710 | 7271128 | 1550333 | --- | --- | --- | 1,92 | down |
| 6241782 | 7339379 | 1718346 | --- | --- | --- | 1,31 | up   |
| 6241797 | 7361420 | 1773043 | --- | --- | --- | 1,05 | up   |
| 6241807 | 7351951 | 1749838 | --- | --- | --- | 1,68 | up   |
| 6241839 | 7237719 | 1467529 | --- | --- | --- | 1,21 | up   |
| 6241945 | 7341397 | 1723628 | --- | --- | --- | 1,13 | down |
| 6242008 | 7206133 | 1389960 | --- | --- | --- | 1,27 | down |
| 6242183 | 7258323 | 1518472 | --- | --- | --- | 8,08 | down |
| 6242209 | 7297589 | 1615592 | --- | --- | --- | 1,53 | up   |
| 6242418 | 7247848 | 1492073 | --- | --- | --- | 1,05 | down |
| 6242454 | 7367969 | 1789094 | --- | --- | --- | 1,44 | up   |
| 6242485 | 7086966 | 1095287 | --- | --- | --- | 1,19 | down |
| 6242557 | 7353441 | 1753335 | --- | --- | --- | 1,25 | down |

|         |         |         |     |     |     |      |      |
|---------|---------|---------|-----|-----|-----|------|------|
| 6242566 | 7050930 | 1011624 | --- | --- | --- | 1,35 | up   |
| 6242584 | 7149817 | 1250309 | --- | --- | --- | 1,36 | down |
| 6242588 | 7229886 | 1447157 | --- | --- | --- | 1,07 | down |
| 6242634 | 7031325 | 963570  | --- | --- | --- | 1,11 | up   |
| 6242684 | 7217650 | 1417200 | --- | --- | --- | 1,09 | down |
| 6242969 | 7180243 | 1325505 | --- | --- | --- | 1,27 | up   |
| 6243091 | 7148978 | 1248553 | --- | --- | --- | 1,20 | down |
| 6243125 | 7139708 | 1225063 | --- | --- | --- | 1,22 | up   |
| 6243186 | 7112225 | 1157539 | --- | --- | --- | 1,29 | up   |
| 6243212 | 7240569 | 1475494 | --- | --- | --- | 1,42 | down |
| 6243226 | 7096924 | 1119614 | --- | --- | --- | 1,44 | up   |
| 6243229 | 7243130 | 1480845 | --- | --- | --- | 1,01 | up   |
| 6243295 | 7315206 | 1660014 | --- | --- | --- | 1,46 | up   |
| 6243333 | 7344838 | 1732459 | --- | --- | --- | 1,12 | down |
| 6243495 | 7320337 | 1673334 | --- | --- | --- | 1,33 | up   |
| 6243551 | 7317088 | 1665058 | --- | --- | --- | 1,38 | up   |
| 6243590 | 7367990 | 1789220 | --- | --- | --- | 1,19 | down |
| 6243632 | 7076236 | 1071238 | --- | --- | --- | 1,11 | down |
| 6243733 | 7294264 | 1606843 | --- | --- | --- | 1,60 | up   |
| 6243747 | 7150497 | 1251783 | --- | --- | --- | 1,16 | up   |
| 6243840 | 7099573 | 1126739 | --- | --- | --- | 1,10 | up   |
| 6243843 | 7132125 | 1206618 | --- | --- | --- | 1,00 | down |
| 6243875 | 7312621 | 1653460 | --- | --- | --- | 1,14 | up   |
| 6244073 | 7092549 | 1109128 | --- | --- | --- | 1,35 | down |
| 6244093 | 7303616 | 1631335 | --- | --- | --- | 1,06 | down |
| 6244348 | 7038530 | 981878  | --- | --- | --- | 1,15 | up   |
| 6244567 | 7156061 | 1265827 | --- | --- | --- | 1,29 | up   |
| 6244591 | 7101643 | 1131565 | --- | --- | --- | 1,03 | up   |
| 6244639 | 7097680 | 1121745 | --- | --- | --- | 1,23 | down |
| 6244735 | 7368804 | 1792265 | --- | --- | --- | 1,69 | down |
| 6244813 | 7154655 | 1262344 | --- | --- | --- | 1,02 | down |
| 6244883 | 7080106 | 1079750 | --- | --- | --- | 1,09 | down |
| 6244916 | 7180620 | 1326404 | --- | --- | --- | 1,10 | down |
| 6244990 | 7096924 | 1119608 | --- | --- | --- | 1,51 | up   |
| 6245310 | 7092549 | 1109161 | --- | --- | --- | 1,04 | down |
| 6245316 | 7231835 | 1452283 | --- | --- | --- | 1,15 | up   |
| 6245371 | 7087492 | 1096704 | --- | --- | --- | 1,09 | down |
| 6245412 | 7274585 | 1558795 | --- | --- | --- | 1,33 | up   |
| 6245484 | 7249503 | 1496230 | --- | --- | --- | 1,16 | down |
| 6245564 | 7142416 | 1231800 | --- | --- | --- | 1,39 | up   |
| 6245624 | 7152038 | 1255398 | --- | --- | --- | 1,46 | down |
| 6245625 | 7363674 | 1778432 | --- | --- | --- | 1,42 | up   |
| 6245643 | 7287222 | 1589716 | --- | --- | --- | 1,13 | up   |
| 6245683 | 7168858 | 1296842 | --- | --- | --- | 1,31 | down |
| 6245698 | 7197820 | 1370087 | --- | --- | --- | 1,55 | down |
| 6245768 | 7331297 | 1698815 | --- | --- | --- | 1,17 | up   |
| 6245797 | 7060851 | 1033432 | --- | --- | --- | 1,15 | down |
| 6245912 | 7359460 | 1768474 | --- | --- | --- | 1,18 | down |
| 6246116 | 7260636 | 1524367 | --- | --- | --- | 1,09 | up   |
| 6246142 | 7280743 | 1574511 | --- | --- | --- | 1,76 | down |
| 6246201 | 7326612 | 1687193 | --- | --- | --- | 1,12 | down |
| 6246258 | 7280743 | 1574555 | --- | --- | --- | 1,46 | up   |
| 6246304 | 7082098 | 1084112 | --- | --- | --- | 1,04 | up   |
| 6246362 | 7363132 | 1776958 | --- | --- | --- | 1,26 | down |
| 6246383 | 7156052 | 1265743 | --- | --- | --- | 1,42 | up   |
| 6246521 | 7338807 | 1716794 | --- | --- | --- | 1,02 | down |

|         |         |         |     |     |     |      |      |
|---------|---------|---------|-----|-----|-----|------|------|
| 6246735 | 7257976 | 1517713 | --- | --- | --- | 1,14 | down |
| 6246760 | 7075445 | 1069360 | --- | --- | --- | 1,49 | up   |
| 6246803 | 7068259 | 1051653 | --- | --- | --- | 1,77 | down |
| 6246839 | 7082098 | 1084120 | --- | --- | --- | 1,55 | up   |
| 6246840 | 7180861 | 1327223 | --- | --- | --- | 1,20 | down |
| 6246870 | 7088625 | 1099879 | --- | --- | --- | 1,46 | down |
| 6246939 | 7179143 | 1322790 | --- | --- | --- | 1,06 | down |
| 6246990 | 7331434 | 1699200 | --- | --- | --- | 1,17 | up   |
| 6247043 | 7340990 | 1722501 | --- | --- | --- | 1,09 | down |
| 6247094 | 7297274 | 1614649 | --- | --- | --- | 1,44 | down |
| 6247151 | 7196029 | 1365636 | --- | --- | --- | 1,67 | down |
| 6247182 | 7186464 | 1341375 | --- | --- | --- | 1,07 | up   |
| 6247444 | 7049332 | 1008173 | --- | --- | --- | 1,08 | up   |
| 6247626 | 7040260 | 986083  | --- | --- | --- | 1,02 | up   |
| 6247748 | 7240569 | 1475472 | --- | --- | --- | 1,09 | down |
| 6247910 | 7068697 | 1052762 | --- | --- | --- | 2,27 | up   |
| 6248012 | 7052933 | 1016219 | --- | --- | --- | 1,03 | up   |
| 6248048 | 7180620 | 1326391 | --- | --- | --- | 1,15 | up   |
| 6248123 | 7165954 | 1288771 | --- | --- | --- | 1,08 | down |
| 6248186 | 7211363 | 1402039 | --- | --- | --- | 1,45 | up   |
| 6248192 | 7352046 | 1750042 | --- | --- | --- | 1,25 | up   |
| 6248346 | 7302018 | 1626964 | --- | --- | --- | 1,01 | up   |
| 6248416 | 7235521 | 1462151 | --- | --- | --- | 1,20 | down |
| 6248427 | 7080106 | 1079715 | --- | --- | --- | 1,37 | down |
| 6248452 | 7119930 | 1177221 | --- | --- | --- | 1,11 | up   |
| 6248479 | 7303616 | 1631382 | --- | --- | --- | 1,03 | down |
| 6248484 | 7142081 | 1230966 | --- | --- | --- | 1,06 | down |
| 6248557 | 7112225 | 1157601 | --- | --- | --- | 1,26 | up   |
| 6248644 | 7203872 | 1384782 | --- | --- | --- | 1,35 | down |
| 6248793 | 7200545 | 1376909 | --- | --- | --- | 1,23 | down |
| 6248807 | 7361042 | 1772264 | --- | --- | --- | 1,15 | up   |
| 6248890 | 7263248 | 1530604 | --- | --- | --- | 1,51 | up   |
| 6248941 | 7190534 | 1351222 | --- | --- | --- | 1,26 | down |
| 6248956 | 7065823 | 1045713 | --- | --- | --- | 1,03 | down |
| 6248957 | 7033541 | 969977  | --- | --- | --- | 1,53 | down |
| 6249102 | 7098126 | 1122961 | --- | --- | --- | 1,42 | down |
| 6249126 | 7248790 | 1494554 | --- | --- | --- | 1,07 | up   |
| 6249235 | 7249503 | 1496229 | --- | --- | --- | 1,22 | up   |
| 6249270 | 7297274 | 1614655 | --- | --- | --- | 1,09 | up   |
| 6249281 | 7293757 | 1605679 | --- | --- | --- | 1,49 | up   |
| 6249303 | 7129841 | 1200834 | --- | --- | --- | 1,04 | down |
| 6249403 | 7037764 | 980104  | --- | --- | --- | 1,09 | down |
| 6249410 | 7176456 | 1315820 | --- | --- | --- | 1,47 | down |
| 6249427 | 7188829 | 1346665 | --- | --- | --- | 2,02 | up   |
| 6249451 | 7067670 | 1050374 | --- | --- | --- | 1,66 | down |
| 6249456 | 7249503 | 1496225 | --- | --- | --- | 1,10 | up   |
| 6249458 | 7286807 | 1588787 | --- | --- | --- | 1,10 | up   |
| 6249502 | 7097240 | 1120364 | --- | --- | --- | 1,14 | down |
| 6249538 | 7330396 | 1696363 | --- | --- | --- | 2,26 | down |
| 6249573 | 7183182 | 1333564 | --- | --- | --- | 2,14 | up   |
| 6249675 | 7268736 | 1544323 | --- | --- | --- | 1,04 | down |
| 6249961 | 7321029 | 1674831 | --- | --- | --- | 1,21 | up   |
| 6249971 | 7084993 | 1090677 | --- | --- | --- | 1,18 | down |
| 6250018 | 7068086 | 1051198 | --- | --- | --- | 1,01 | up   |
| 6250029 | 7225370 | 1435522 | --- | --- | --- | 1,06 | down |
| 6250078 | 7181193 | 1328292 | --- | --- | --- | 1,34 | down |

|         |         |         |     |     |     |      |      |
|---------|---------|---------|-----|-----|-----|------|------|
| 6250080 | 7240569 | 1475461 | --- | --- | --- | 1,24 | up   |
| 6250082 | 7210263 | 1399765 | --- | --- | --- | 1,63 | up   |
| 6250179 | 7236395 | 1464320 | --- | --- | --- | 1,19 | down |
| 6250186 | 7180861 | 1327210 | --- | --- | --- | 1,93 | up   |
| 6250289 | 7061003 | 1033921 | --- | --- | --- | 1,15 | up   |
| 6250326 | 7320234 | 1673043 | --- | --- | --- | 1,39 | down |
| 6250331 | 7067670 | 1050366 | --- | --- | --- | 1,19 | up   |
| 6250561 | 7293646 | 1605413 | --- | --- | --- | 1,21 | up   |
| 6250661 | 7072765 | 1062747 | --- | --- | --- | 1,02 | down |
| 6250735 | 7243603 | 1482274 | --- | --- | --- | 1,07 | up   |
| 6250754 | 7200996 | 1378152 | --- | --- | --- | 1,36 | up   |
| 6250786 | 7145669 | 1239990 | --- | --- | --- | 1,42 | up   |
| 6250816 | 7144389 | 1236781 | --- | --- | --- | 1,52 | down |
| 6250848 | 7086966 | 1095286 | --- | --- | --- | 1,12 | down |
| 6250885 | 7290288 | 1597339 | --- | --- | --- | 1,42 | down |
| 6250941 | 7071264 | 1059361 | --- | --- | --- | 1,17 | down |
| 6251035 | 7050930 | 1011613 | --- | --- | --- | 1,02 | up   |
| 6251152 | 7303616 | 1631380 | --- | --- | --- | 1,01 | up   |
| 6251197 | 7339379 | 1718347 | --- | --- | --- | 1,39 | down |
| 6251425 | 7243130 | 1480892 | --- | --- | --- | 1,35 | down |
| 6251582 | 7276905 | 1564816 | --- | --- | --- | 1,41 | up   |
| 6251595 | 7127540 | 1195288 | --- | --- | --- | 1,09 | up   |
| 6251613 | 7117158 | 1169995 | --- | --- | --- | 1,13 | up   |
| 6251624 | 7233921 | 1458157 | --- | --- | --- | 1,71 | down |
| 6251633 | 7092549 | 1109145 | --- | --- | --- | 1,09 | down |
| 6251660 | 7080731 | 1080983 | --- | --- | --- | 1,11 | down |
| 6251666 | 7217650 | 1417201 | --- | --- | --- | 1,63 | down |
| 6251756 | 7363772 | 1778620 | --- | --- | --- | 2,14 | up   |
| 6251885 | 7380452 | 1821677 | --- | --- | --- | 1,40 | down |
| 6252016 | 7321029 | 1674825 | --- | --- | --- | 1,48 | down |
| 6252302 | 7071264 | 1059355 | --- | --- | --- | 1,81 | up   |
| 6252320 | 7186464 | 1341378 | --- | --- | --- | 1,14 | down |
| 6252385 | 7088489 | 1099531 | --- | --- | --- | 1,04 | down |
| 6252426 | 7217679 | 1417298 | --- | --- | --- | 1,19 | down |
| 6252494 | 7031774 | 964737  | --- | --- | --- | 1,18 | down |
| 6252610 | 7025652 | 950339  | --- | --- | --- | 1,11 | up   |
| 6252675 | 7301140 | 1624582 | --- | --- | --- | 1,25 | up   |
| 6252859 | 7329558 | 1694418 | --- | --- | --- | 1,11 | up   |
| 6252989 | 7043379 | 993638  | --- | --- | --- | 1,09 | down |
| 6253052 | 7059584 | 1030546 | --- | --- | --- | 1,06 | down |
| 6253119 | 7243130 | 1480938 | --- | --- | --- | 1,07 | up   |
| 6253292 | 7049399 | 1008370 | --- | --- | --- | 1,11 | down |
| 6253307 | 7342959 | 1727339 | --- | --- | --- | 1,05 | down |
| 6253318 | 7279194 | 1571006 | --- | --- | --- | 2,32 | down |
| 6253393 | 7112225 | 1157626 | --- | --- | --- | 1,21 | up   |
| 6253423 | 7384509 | 1830752 | --- | --- | --- | 1,14 | down |
| 6253438 | 7107321 | 1145319 | --- | --- | --- | 1,13 | down |
| 6253682 | 7244288 | 1484094 | --- | --- | --- | 1,24 | up   |
| 6253734 | 7038316 | 981460  | --- | --- | --- | 1,05 | down |
| 6253926 | 7263652 | 1531629 | --- | --- | --- | 1,62 | down |
| 6254003 | 7279073 | 1570681 | --- | --- | --- | 1,09 | down |
| 6254006 | 7069142 | 1053877 | --- | --- | --- | 1,03 | up   |
| 6254150 | 7144135 | 1236326 | --- | --- | --- | 1,07 | down |
| 6254183 | 7211363 | 1402036 | --- | --- | --- | 1,27 | up   |
| 6254211 | 7189689 | 1349057 | --- | --- | --- | 1,42 | up   |
| 6254245 | 7082832 | 1085760 | --- | --- | --- | 1,43 | up   |

|         |         |         |     |     |     |      |      |
|---------|---------|---------|-----|-----|-----|------|------|
| 6254249 | 7384073 | 1829463 | --- | --- | --- | 1,31 | up   |
| 6254301 | 7148978 | 1248539 | --- | --- | --- | 1,69 | up   |
| 6254337 | 7196029 | 1365609 | --- | --- | --- | 1,48 | down |
| 6254439 | 7039265 | 983658  | --- | --- | --- | 2,45 | up   |
| 6254473 | 7236395 | 1464335 | --- | --- | --- | 1,15 | up   |
| 6254480 | 7087965 | 1098055 | --- | --- | --- | 1,12 | down |
| 6254544 | 7052385 | 1014805 | --- | --- | --- | 1,10 | down |
| 6254553 | 7329135 | 1693500 | --- | --- | --- | 1,11 | up   |
| 6254739 | 7331829 | 1700181 | --- | --- | --- | 1,06 | up   |
| 6254872 | 7090278 | 1104134 | --- | --- | --- | 1,19 | down |
| 6254889 | 7312566 | 1653298 | --- | --- | --- | 1,05 | down |
| 6255029 | 7253408 | 1505945 | --- | --- | --- | 1,00 | down |
| 6255062 | 7373417 | 1805109 | --- | --- | --- | 1,08 | down |
| 6255107 | 7230698 | 1449061 | --- | --- | --- | 1,30 | down |
| 6255127 | 7108551 | 1148696 | --- | --- | --- | 2,14 | up   |
| 6255163 | 7236991 | 1465780 | --- | --- | --- | 1,26 | up   |
| 6255181 | 7090278 | 1104135 | --- | --- | --- | 1,02 | down |
| 6255196 | 7213945 | 1407853 | --- | --- | --- | 1,08 | down |
| 6255213 | 7099517 | 1126490 | --- | --- | --- | 1,01 | up   |
| 6255242 | 7232340 | 1453530 | --- | --- | --- | 1,08 | up   |
| 6255293 | 7267802 | 1541741 | --- | --- | --- | 1,04 | down |
| 6255330 | 7040260 | 986075  | --- | --- | --- | 1,03 | down |
| 6255390 | 7312338 | 1652767 | --- | --- | --- | 1,32 | down |
| 6255397 | 7092965 | 1110191 | --- | --- | --- | 1,12 | down |
| 6255687 | 7198325 | 1371334 | --- | --- | --- | 1,28 | up   |
| 6255991 | 7217747 | 1417496 | --- | --- | --- | 1,44 | down |
| 6256084 | 7380497 | 1821822 | --- | --- | --- | 1,03 | up   |
| 6256197 | 7331413 | 1699138 | --- | --- | --- | 1,06 | up   |
| 6256240 | 7230611 | 1448803 | --- | --- | --- | 1,06 | up   |
| 6256385 | 7336250 | 1710171 | --- | --- | --- | 1,11 | up   |
| 6256413 | 7202550 | 1381604 | --- | --- | --- | 1,39 | down |
| 6256628 | 7194172 | 1361182 | --- | --- | --- | 1,43 | up   |
| 6256753 | 7361223 | 1772615 | --- | --- | --- | 2,45 | up   |
| 6256896 | 7082098 | 1084107 | --- | --- | --- | 1,00 | down |
| 6256901 | 7087965 | 1098030 | --- | --- | --- | 1,09 | down |
| 6256990 | 7217679 | 1417299 | --- | --- | --- | 1,69 | down |
| 6257036 | 7087805 | 1097471 | --- | --- | --- | 1,33 | down |
| 6257141 | 7344836 | 1732409 | --- | --- | --- | 1,05 | up   |
| 6257173 | 7139709 | 1225074 | --- | --- | --- | 1,28 | down |
| 6257190 | 7373906 | 1806350 | --- | --- | --- | 1,22 | down |
| 6257199 | 7202550 | 1381606 | --- | --- | --- | 2,26 | down |
| 6257254 | 7339286 | 1718108 | --- | --- | --- | 1,50 | up   |
| 6257336 | 7362184 | 1774822 | --- | --- | --- | 1,12 | up   |
| 6257573 | 7233359 | 1456515 | --- | --- | --- | 1,06 | up   |
| 6257594 | 7055876 | 1022500 | --- | --- | --- | 1,12 | down |
| 6257867 | 7293234 | 1604332 | --- | --- | --- | 1,19 | down |
| 6257876 | 7148271 | 1246646 | --- | --- | --- | 1,16 | up   |
| 6257878 | 7099030 | 1125339 | --- | --- | --- | 1,26 | up   |
| 6257958 | 7267380 | 1540433 | --- | --- | --- | 1,04 | down |
| 6258018 | 7108300 | 1147909 | --- | --- | --- | 1,20 | down |
| 6258092 | 7279568 | 1572036 | --- | --- | --- | 1,01 | up   |
| 6258103 | 7062173 | 1037000 | --- | --- | --- | 1,09 | down |
| 6258105 | 7184850 | 1337606 | --- | --- | --- | 1,22 | down |
| 6258124 | 7065266 | 1044581 | --- | --- | --- | 1,24 | up   |
| 6258145 | 7102976 | 1135050 | --- | --- | --- | 1,14 | down |
| 6258310 | 7036412 | 976866  | --- | --- | --- | 1,01 | down |

|         |         |         |     |     |     |      |      |
|---------|---------|---------|-----|-----|-----|------|------|
| 6258369 | 7307721 | 1642004 | --- | --- | --- | 1,15 | down |
| 6258417 | 7234195 | 1458977 | --- | --- | --- | 1,04 | up   |
| 6258432 | 7191382 | 1353516 | --- | --- | --- | 1,25 | up   |
| 6258447 | 7120827 | 1179350 | --- | --- | --- | 1,34 | down |
| 6258520 | 7094346 | 1113394 | --- | --- | --- | 2,11 | up   |
| 6258521 | 7037764 | 980084  | --- | --- | --- | 1,13 | up   |
| 6258539 | 7233440 | 1456838 | --- | --- | --- | 1,13 | up   |
| 6258545 | 7289909 | 1596508 | --- | --- | --- | 1,20 | down |
| 6258611 | 7279533 | 1571917 | --- | --- | --- | 1,20 | down |
| 6258777 | 7367990 | 1789222 | --- | --- | --- | 2,51 | up   |
| 6258778 | 7316644 | 1664042 | --- | --- | --- | 1,35 | up   |
| 6258826 | 7060195 | 1031972 | --- | --- | --- | 1,12 | down |
| 6258830 | 7113483 | 1161008 | --- | --- | --- | 1,71 | up   |
| 6258836 | 7264085 | 1532719 | --- | --- | --- | 1,02 | up   |
| 6258935 | 7129841 | 1200836 | --- | --- | --- | 2,18 | up   |
| 6259012 | 7236358 | 1464257 | --- | --- | --- | 1,05 | up   |
| 6259405 | 7104955 | 1140124 | --- | --- | --- | 2,22 | down |
| 6259544 | 7292517 | 1602549 | --- | --- | --- | 1,23 | up   |
| 6259579 | 7243603 | 1482267 | --- | --- | --- | 1,37 | up   |
| 6259602 | 7264085 | 1532719 | --- | --- | --- | 1,21 | down |
| 6259644 | 7297589 | 1615682 | --- | --- | --- | 1,04 | down |
| 6259678 | 7235069 | 1460991 | --- | --- | --- | 2,26 | down |
| 6259696 | 7231835 | 1452284 | --- | --- | --- | 1,00 | down |
| 6259848 | 7049399 | 1008328 | --- | --- | --- | 1,17 | down |
| 6259889 | 7326612 | 1687196 | --- | --- | --- | 1,33 | down |
| 6259914 | 7316644 | 1664059 | --- | --- | --- | 1,10 | up   |
| 6259989 | 7049399 | 1008391 | --- | --- | --- | 1,07 | down |
| 6260050 | 7352100 | 1750204 | --- | --- | --- | 1,65 | down |
| 6260051 | 7369712 | 1794822 | --- | --- | --- | 1,20 | down |
| 6260101 | 7340757 | 1721896 | --- | --- | --- | 2,04 | down |
| 6260105 | 7236987 | 1465732 | --- | --- | --- | 1,10 | up   |
| 6260106 | 7131550 | 1205563 | --- | --- | --- | 1,13 | up   |
| 6260119 | 7243130 | 1480935 | --- | --- | --- | 1,45 | up   |
| 6260210 | 7311218 | 1650342 | --- | --- | --- | 1,12 | down |
| 6260255 | 7373658 | 1805802 | --- | --- | --- | 1,10 | up   |
| 6260482 | 7330659 | 1697060 | --- | --- | --- | 1,42 | down |
| 6260525 | 7068853 | 1053107 | --- | --- | --- | 1,19 | up   |
| 6260769 | 7341546 | 1723973 | --- | --- | --- | 1,30 | down |
| 6260858 | 7357815 | 1764148 | --- | --- | --- | 1,19 | down |
| 6260901 | 7132125 | 1206614 | --- | --- | --- | 1,01 | down |
| 6261045 | 7162144 | 1280508 | --- | --- | --- | 1,09 | up   |
| 6261197 | 7156061 | 1265840 | --- | --- | --- | 1,15 | up   |
| 6261256 | 7076236 | 1071203 | --- | --- | --- | 1,21 | down |
| 6261484 | 7234434 | 1459418 | --- | --- | --- | 2,05 | down |
| 6261505 | 7168858 | 1296830 | --- | --- | --- | 1,07 | down |
| 6261562 | 7087492 | 1096705 | --- | --- | --- | 1,16 | up   |
| 6261603 | 7095008 | 1115053 | --- | --- | --- | 2,09 | down |
| 6261743 | 7111181 | 1155223 | --- | --- | --- | 1,02 | up   |
| 6261744 | 7184981 | 1337834 | --- | --- | --- | 1,17 | down |
| 6261781 | 7305674 | 1636854 | --- | --- | --- | 1,08 | down |
| 6261907 | 7064224 | 1041781 | --- | --- | --- | 1,49 | up   |
| 6261949 | 7025652 | 950352  | --- | --- | --- | 1,33 | up   |
| 6261950 | 7249503 | 1496170 | --- | --- | --- | 1,16 | up   |
| 6261974 | 7180721 | 1326697 | --- | --- | --- | 1,17 | down |
| 6262119 | 7294151 | 1606612 | --- | --- | --- | 1,48 | down |
| 6262128 | 7168858 | 1296842 | --- | --- | --- | 1,08 | up   |

|         |         |         |     |     |     |      |      |
|---------|---------|---------|-----|-----|-----|------|------|
| 6262241 | 7289382 | 1595194 | --- | --- | --- | 1,02 | up   |
| 6262597 | 7373906 | 1806363 | --- | --- | --- | 1,11 | down |
| 6262764 | 7050710 | 1011173 | --- | --- | --- | 1,34 | up   |
| 6262862 | 7373732 | 1805974 | --- | --- | --- | 1,00 | down |
| 6262873 | 7373038 | 1804289 | --- | --- | --- | 1,21 | up   |
| 6262980 | 7224035 | 1432401 | --- | --- | --- | 1,09 | down |
| 6263014 | 7249503 | 1496193 | --- | --- | --- | 1,17 | down |
| 6263128 | 7314115 | 1657311 | --- | --- | --- | 1,59 | down |
| 6263267 | 7243130 | 1480858 | --- | --- | --- | 1,07 | down |
| 6263278 | 7240569 | 1475395 | --- | --- | --- | 1,39 | down |
| 6263291 | 7086522 | 1093957 | --- | --- | --- | 2,12 | down |
| 6263332 | 7210713 | 1400753 | --- | --- | --- | 1,40 | down |
| 6263452 | 7072225 | 1061405 | --- | --- | --- | 1,22 | up   |
| 6263474 | 7323560 | 1680036 | --- | --- | --- | 1,83 | down |
| 6263695 | 7307485 | 1641385 | --- | --- | --- | 1,73 | up   |
| 6263712 | 7036412 | 976861  | --- | --- | --- | 2,02 | down |
| 6263766 | 7328695 | 1692357 | --- | --- | --- | 1,12 | up   |
| 6263825 | 7156061 | 1265831 | --- | --- | --- | 1,59 | down |
| 6263973 | 7258345 | 1518539 | --- | --- | --- | 2,63 | up   |
| 6264131 | 7280743 | 1574528 | --- | --- | --- | 1,30 | down |
| 6264163 | 7231152 | 1450226 | --- | --- | --- | 1,76 | up   |
| 6264204 | 7370001 | 1795761 | --- | --- | --- | 1,03 | up   |
| 6264210 | 7070616 | 1057795 | --- | --- | --- | 1,42 | up   |
| 6264243 | 7238115 | 1468608 | --- | --- | --- | 1,02 | up   |
| 6264275 | 7331719 | 1699917 | --- | --- | --- | 1,19 | down |
| 6264342 | 7056333 | 1023688 | --- | --- | --- | 1,10 | down |
| 6264610 | 7276650 | 1564142 | --- | --- | --- | 2,13 | down |
| 6264652 | 7189574 | 1348709 | --- | --- | --- | 1,14 | down |
| 6264695 | 7111361 | 1155578 | --- | --- | --- | 1,13 | up   |
| 6264707 | 7236991 | 1465821 | --- | --- | --- | 2,38 | down |
| 6264716 | 7174149 | 1310495 | --- | --- | --- | 1,18 | down |
| 6264841 | 7331434 | 1699202 | --- | --- | --- | 1,06 | down |
| 6264850 | 7264797 | 1534422 | --- | --- | --- | 1,00 | up   |
| 6265004 | 7070869 | 1058495 | --- | --- | --- | 1,02 | up   |
| 6265031 | 7360325 | 1770519 | --- | --- | --- | 1,18 | up   |
| 6265039 | 7360486 | 1770947 | --- | --- | --- | 1,30 | down |
| 6265073 | 7108345 | 1148081 | --- | --- | --- | 1,02 | up   |
| 6265177 | 7318596 | 1668935 | --- | --- | --- | 1,07 | up   |
| 6265185 | 7240569 | 1475464 | --- | --- | --- | 1,32 | up   |
| 6265207 | 7071714 | 1060363 | --- | --- | --- | 1,16 | down |
| 6265211 | 7209927 | 1398943 | --- | --- | --- | 1,04 | up   |
| 6265213 | 7352046 | 1750036 | --- | --- | --- | 2,02 | down |
| 6265295 | 7303616 | 1631331 | --- | --- | --- | 1,03 | down |
| 6265298 | 7365093 | 1781624 | --- | --- | --- | 2,17 | up   |
| 6265386 | 7175368 | 1313282 | --- | --- | --- | 1,14 | up   |
| 6265516 | 7314270 | 1657752 | --- | --- | --- | 1,10 | up   |
| 6265669 | 7175355 | 1313244 | --- | --- | --- | 2,00 | down |
| 6265747 | 7116614 | 1168790 | --- | --- | --- | 1,12 | down |
| 6265780 | 7098366 | 1123625 | --- | --- | --- | 1,15 | up   |
| 6266091 | 7253408 | 1505944 | --- | --- | --- | 1,69 | up   |
| 6266168 | 7189689 | 1349041 | --- | --- | --- | 1,08 | down |
| 6266214 | 7373906 | 1806362 | --- | --- | --- | 1,21 | down |
| 6266298 | 7240569 | 1475510 | --- | --- | --- | 1,26 | down |
| 6266374 | 7181193 | 1328300 | --- | --- | --- | 1,20 | down |
| 6266383 | 7099294 | 1126099 | --- | --- | --- | 1,40 | up   |
| 6266459 | 7331297 | 1698802 | --- | --- | --- | 1,27 | down |

|         |         |         |     |     |     |      |      |
|---------|---------|---------|-----|-----|-----|------|------|
| 6266501 | 7091954 | 1107727 | --- | --- | --- | 1,16 | down |
| 6266629 | 7038316 | 981462  | --- | --- | --- | 1,03 | up   |
| 6266685 | 7367959 | 1789070 | --- | --- | --- | 3,16 | up   |
| 6266727 | 7099573 | 1126730 | --- | --- | --- | 1,56 | up   |
| 6266786 | 7180861 | 1327185 | --- | --- | --- | 1,01 | down |
| 6266811 | 7361420 | 1773040 | --- | --- | --- | 1,23 | up   |
| 6267153 | 7329846 | 1695000 | --- | --- | --- | 1,00 | down |
| 6267159 | 7072332 | 1061646 | --- | --- | --- | 2,11 | up   |
| 6267206 | 7199476 | 1374556 | --- | --- | --- | 1,20 | up   |
| 6267248 | 7326612 | 1687197 | --- | --- | --- | 1,01 | up   |
| 6267402 | 7036870 | 977870  | --- | --- | --- | 1,20 | up   |
| 6267523 | 7274593 | 1558816 | --- | --- | --- | 1,04 | up   |
| 6267563 | 7067670 | 1050312 | --- | --- | --- | 1,65 | up   |
| 6267711 | 7226232 | 1437738 | --- | --- | --- | 1,84 | down |
| 6267727 | 7199341 | 1374145 | --- | --- | --- | 1,01 | up   |
| 6267787 | 7025652 | 950337  | --- | --- | --- | 1,03 | down |
| 6267880 | 7342414 | 1726093 | --- | --- | --- | 1,51 | up   |
| 6267919 | 7231835 | 1452282 | --- | --- | --- | 1,02 | up   |
| 6267959 | 7247229 | 1490559 | --- | --- | --- | 1,28 | down |
| 6268045 | 7117187 | 1170157 | --- | --- | --- | 1,03 | down |
| 6268199 | 7098077 | 1122729 | --- | --- | --- | 1,15 | down |
| 6268210 | 7331413 | 1699132 | --- | --- | --- | 1,34 | up   |
| 6268231 | 7319259 | 1670398 | --- | --- | --- | 1,11 | up   |
| 6268325 | 7163002 | 1282282 | --- | --- | --- | 1,14 | up   |
| 6268355 | 7256191 | 1512866 | --- | --- | --- | 1,02 | down |
| 6268390 | 7281140 | 1575714 | --- | --- | --- | 1,41 | up   |
| 6268470 | 7343122 | 1727731 | --- | --- | --- | 1,20 | down |
| 6268538 | 7331297 | 1698810 | --- | --- | --- | 2,14 | up   |
| 6268910 | 7031774 | 964770  | --- | --- | --- | 1,25 | down |
| 6268917 | 7061367 | 1034828 | --- | --- | --- | 1,30 | down |
| 6269011 | 7289856 | 1596357 | --- | --- | --- | 1,80 | down |
| 6269244 | 7330396 | 1696355 | --- | --- | --- | 1,03 | up   |
| 6269462 | 7131360 | 1204989 | --- | --- | --- | 1,20 | down |
| 6269516 | 7172988 | 1307278 | --- | --- | --- | 1,02 | up   |
| 6269686 | 7334331 | 1705688 | --- | --- | --- | 1,01 | down |
| 6269693 | 7293402 | 1604809 | --- | --- | --- | 1,55 | up   |
| 6269697 | 7300906 | 1624048 | --- | --- | --- | 1,19 | up   |
| 6269731 | 7358048 | 1764809 | --- | --- | --- | 1,13 | up   |
| 6269798 | 7237438 | 1466795 | --- | --- | --- | 1,11 | up   |
| 6269844 | 7368004 | 1789336 | --- | --- | --- | 1,42 | up   |
| 6269910 | 7237719 | 1467482 | --- | --- | --- | 1,03 | down |
| 6269955 | 7200545 | 1376911 | --- | --- | --- | 1,06 | up   |
| 6269975 | 7340057 | 1720330 | --- | --- | --- | 1,46 | down |
| 6270025 | 7092965 | 1110203 | --- | --- | --- | 1,12 | up   |
| 6270029 | 7337845 | 1714339 | --- | --- | --- | 1,10 | down |
| 6270100 | 7167883 | 1294108 | --- | --- | --- | 1,05 | down |
| 6270396 | 7052385 | 1014782 | --- | --- | --- | 1,51 | down |
| 6270449 | 7376206 | 1811979 | --- | --- | --- | 1,12 | down |
| 6270465 | 7197056 | 1367839 | --- | --- | --- | 1,18 | up   |
| 6270762 | 7033672 | 970344  | --- | --- | --- | 1,45 | up   |
| 6270791 | 7294151 | 1606601 | --- | --- | --- | 1,24 | down |
| 6270796 | 7177520 | 1318622 | --- | --- | --- | 1,12 | down |
| 6270819 | 7229886 | 1447152 | --- | --- | --- | 1,42 | down |
| 6271002 | 7098126 | 1122957 | --- | --- | --- | 1,39 | up   |
| 6271075 | 7174149 | 1310489 | --- | --- | --- | 1,01 | up   |
| 6271136 | 7330727 | 1697144 | --- | --- | --- | 1,05 | up   |



|         |         |         |     |     |     |      |      |
|---------|---------|---------|-----|-----|-----|------|------|
| 6271275 | 7365183 | 1781935 | --- | --- | --- | 1,13 | up   |
| 6271374 | 7265259 | 1535444 | --- | --- | --- | 1,14 | up   |
| 6271510 | 7197056 | 1367847 | --- | --- | --- | 1,67 | down |
| 6271530 | 7247954 | 1492400 | --- | --- | --- | 1,06 | down |
| 6271598 | 7217747 | 1417487 | --- | --- | --- | 1,65 | up   |
| 6271638 | 7254040 | 1507583 | --- | --- | --- | 1,52 | up   |
| 6271754 | 7087805 | 1097470 | --- | --- | --- | 1,22 | up   |
| 6271825 | 7373633 | 1805715 | --- | --- | --- | 1,21 | up   |
| 6272078 | 7181169 | 1328125 | --- | --- | --- | 1,16 | up   |
| 6272111 | 7076972 | 1073179 | --- | --- | --- | 1,13 | up   |
| 6272117 | 7253088 | 1505123 | --- | --- | --- | 1,30 | down |
| 6272194 | 7119930 | 1177215 | --- | --- | --- | 1,21 | up   |
| 6272233 | 7186106 | 1340492 | --- | --- | --- | 1,21 | up   |
| 6272440 | 7068259 | 1051660 | --- | --- | --- | 1,38 | down |
| 6272472 | 7244288 | 1484128 | --- | --- | --- | 1,61 | down |
| 6272476 | 7109373 | 1150919 | --- | --- | --- | 1,04 | down |
| 6272530 | 7059584 | 1030542 | --- | --- | --- | 2,08 | down |
| 6272619 | 7088164 | 1098488 | --- | --- | --- | 1,09 | up   |
| 6272724 | 7088164 | 1098478 | --- | --- | --- | 1,06 | up   |
| 6272732 | 7087492 | 1096696 | --- | --- | --- | 1,00 | up   |
| 6272735 | 7171525 | 1303444 | --- | --- | --- | 1,43 | up   |
| 6272758 | 7072552 | 1062137 | --- | --- | --- | 1,24 | down |
| 6272780 | 7111573 | 1156015 | --- | --- | --- | 1,12 | down |
| 6272849 | 7043535 | 994102  | --- | --- | --- | 1,52 | up   |
| 6272874 | 7053874 | 1018330 | --- | --- | --- | 1,03 | up   |
| 6273029 | 7288095 | 1592047 | --- | --- | --- | 2,11 | down |
| 6273133 | 7174281 | 1310845 | --- | --- | --- | 1,62 | up   |
| 6273258 | 7174149 | 1310511 | --- | --- | --- | 1,00 | up   |
| 6273277 | 7037235 | 978586  | --- | --- | --- | 1,28 | up   |
| 6273283 | 7354688 | 1756377 | --- | --- | --- | 1,59 | up   |
| 6273445 | 7049399 | 1008422 | --- | --- | --- | 1,53 | down |
| 6273461 | 7040260 | 986050  | --- | --- | --- | 1,24 | down |
| 6273475 | 7247334 | 1490821 | --- | --- | --- | 1,23 | down |
| 6273523 | 7297589 | 1615672 | --- | --- | --- | 1,24 | up   |
| 6273706 | 7154655 | 1262336 | --- | --- | --- | 1,17 | down |
| 6273764 | 7233012 | 1455403 | --- | --- | --- | 1,06 | down |
| 6273813 | 7198210 | 1370950 | --- | --- | --- | 1,65 | down |
| 6273844 | 7162177 | 1280583 | --- | --- | --- | 1,12 | up   |
| 6273908 | 7303616 | 1631362 | --- | --- | --- | 1,12 | up   |
| 6273957 | 7151063 | 1253073 | --- | --- | --- | 1,92 | up   |
| 6273998 | 7060851 | 1033363 | --- | --- | --- | 1,18 | up   |
| 6274010 | 7358053 | 1764837 | --- | --- | --- | 1,26 | down |
| 6274060 | 7303616 | 1631348 | --- | --- | --- | 1,24 | down |
| 6274282 | 7065265 | 1044563 | --- | --- | --- | 1,21 | up   |
| 6274389 | 7286807 | 1588808 | --- | --- | --- | 1,80 | down |
| 6274462 | 7099650 | 1126884 | --- | --- | --- | 1,59 | up   |
| 6274472 | 7245695 | 1487069 | --- | --- | --- | 1,24 | up   |
| 6274512 | 7108345 | 1148084 | --- | --- | --- | 1,13 | up   |
| 6274633 | 7316644 | 1664032 | --- | --- | --- | 1,40 | up   |
| 6274990 | 7065265 | 1044568 | --- | --- | --- | 1,21 | down |
| 6275054 | 7226241 | 1437785 | --- | --- | --- | 1,24 | up   |
| 6275169 | 7244290 | 1484164 | --- | --- | --- | 1,04 | down |
| 6275280 | 7148978 | 1248538 | --- | --- | --- | 1,13 | down |
| 6275417 | 7096859 | 1119314 | --- | --- | --- | 1,28 | down |
| 6275451 | 7230698 | 1449070 | --- | --- | --- | 1,41 | down |
| 6275552 | 7240569 | 1475405 | --- | --- | --- | 1,02 | down |

|         |         |         |     |     |     |      |      |
|---------|---------|---------|-----|-----|-----|------|------|
| 6275597 | 7237992 | 1468282 | --- | --- | --- | 1,11 | up   |
| 6275701 | 7258784 | 1519670 | --- | --- | --- | 1,44 | up   |
| 6275778 | 7112566 | 1158635 | --- | --- | --- | 1,89 | down |
| 6275814 | 7107066 | 1144783 | --- | --- | --- | 1,29 | up   |
| 6275828 | 7299512 | 1620555 | --- | --- | --- | 1,01 | down |
| 6275830 | 7267953 | 1542259 | --- | --- | --- | 1,40 | up   |
| 6275836 | 7119930 | 1177218 | --- | --- | --- | 1,07 | up   |
| 6275841 | 7080731 | 1080979 | --- | --- | --- | 1,26 | up   |
| 6275864 | 7340838 | 1722074 | --- | --- | --- | 1,40 | up   |
| 6275927 | 7117158 | 1170038 | --- | --- | --- | 1,14 | down |
| 6276071 | 7243603 | 1482273 | --- | --- | --- | 1,25 | up   |
| 6276120 | 7049399 | 1008349 | --- | --- | --- | 1,21 | down |
| 6276162 | 7033504 | 969846  | --- | --- | --- | 1,12 | down |
| 6276312 | 7059375 | 1030050 | --- | --- | --- | 1,44 | up   |
| 6276315 | 7308679 | 1644238 | --- | --- | --- | 2,79 | down |
| 6276328 | 7108345 | 1148077 | --- | --- | --- | 1,26 | up   |
| 6276441 | 7049399 | 1008318 | --- | --- | --- | 1,05 | down |
| 6276595 | 7111573 | 1156036 | --- | --- | --- | 1,22 | down |
| 6276600 | 7059584 | 1030544 | --- | --- | --- | 1,15 | down |
| 6276671 | 7156052 | 1265771 | --- | --- | --- | 1,21 | up   |
| 6277179 | 7217650 | 1417173 | --- | --- | --- | 1,02 | down |
| 6277217 | 7059584 | 1030559 | --- | --- | --- | 1,04 | down |
| 6277241 | 7053874 | 1018309 | --- | --- | --- | 1,00 | up   |
| 6277322 | 7148978 | 1248533 | --- | --- | --- | 1,07 | down |
| 6277425 | 7384509 | 1830747 | --- | --- | --- | 1,25 | up   |
| 6277429 | 7088489 | 1099524 | --- | --- | --- | 1,74 | up   |
| 6277450 | 7231835 | 1452292 | --- | --- | --- | 1,01 | up   |
| 6277476 | 7343122 | 1727738 | --- | --- | --- | 1,22 | up   |
| 6277515 | 7307721 | 1642005 | --- | --- | --- | 1,04 | up   |
| 6277596 | 7185622 | 1339223 | --- | --- | --- | 1,07 | up   |
| 6277660 | 7084993 | 1090669 | --- | --- | --- | 1,04 | down |
| 6277717 | 7034293 | 971987  | --- | --- | --- | 1,55 | down |
| 6277774 | 7270574 | 1548528 | --- | --- | --- | 1,79 | down |
| 6277856 | 7367994 | 1789254 | --- | --- | --- | 1,03 | up   |
| 6277886 | 7073577 | 1064765 | --- | --- | --- | 1,08 | up   |
| 6277984 | 7071616 | 1060071 | --- | --- | --- | 1,08 | up   |
| 6278004 | 7267802 | 1541816 | --- | --- | --- | 1,19 | down |
| 6278018 | 7243130 | 1480869 | --- | --- | --- | 1,25 | down |
| 6278019 | 7165954 | 1288770 | --- | --- | --- | 1,24 | down |
| 6278037 | 7278957 | 1570394 | --- | --- | --- | 1,31 | down |
| 6278056 | 7156044 | 1265716 | --- | --- | --- | 1,09 | down |
| 6278070 | 7373732 | 1805972 | --- | --- | --- | 1,23 | up   |
| 6278079 | 7243647 | 1482464 | --- | --- | --- | 1,37 | down |
| 6278196 | 7050557 | 1010798 | --- | --- | --- | 1,14 | up   |
| 6278224 | 7258545 | 1518929 | --- | --- | --- | 1,02 | up   |
| 6278301 | 7068073 | 1051171 | --- | --- | --- | 1,26 | down |
| 6278325 | 7089238 | 1101666 | --- | --- | --- | 1,80 | down |
| 6278327 | 7065265 | 1044574 | --- | --- | --- | 1,21 | down |
| 6278396 | 7238115 | 1468570 | --- | --- | --- | 1,24 | up   |
| 6278457 | 7199476 | 1374545 | --- | --- | --- | 1,02 | down |
| 6278520 | 7248964 | 1494949 | --- | --- | --- | 1,50 | down |
| 6278581 | 7184850 | 1337598 | --- | --- | --- | 1,08 | up   |
| 6278614 | 7033672 | 970361  | --- | --- | --- | 1,43 | down |
| 6278791 | 7167823 | 1293873 | --- | --- | --- | 2,25 | up   |
| 6278884 | 7369712 | 1794835 | --- | --- | --- | 1,55 | up   |
| 6278917 | 7068259 | 1051656 | --- | --- | --- | 1,15 | up   |

|         |         |         |     |     |     |      |      |
|---------|---------|---------|-----|-----|-----|------|------|
| 6278926 | 7350237 | 1745490 | --- | --- | --- | 1,03 | down |
| 6279031 | 7039463 | 984246  | --- | --- | --- | 1,27 | up   |
| 6279033 | 7263152 | 1530369 | --- | --- | --- | 1,11 | down |
| 6279124 | 7170832 | 1301797 | --- | --- | --- | 1,63 | down |
| 6279196 | 7189689 | 1349050 | --- | --- | --- | 1,10 | down |
| 6279264 | 7174149 | 1310522 | --- | --- | --- | 2,03 | up   |
| 6279365 | 7247749 | 1491881 | --- | --- | --- | 1,05 | up   |
| 6279395 | 7355421 | 1758518 | --- | --- | --- | 2,07 | up   |
| 6279427 | 7096924 | 1119622 | --- | --- | --- | 1,22 | down |
| 6279479 | 7249503 | 1496197 | --- | --- | --- | 1,07 | up   |
| 6279504 | 7108300 | 1147916 | --- | --- | --- | 1,23 | down |
| 6279533 | 7076160 | 1070870 | --- | --- | --- | 1,21 | up   |
| 6279557 | 7273251 | 1555960 | --- | --- | --- | 2,05 | down |
| 6279588 | 7098126 | 1122970 | --- | --- | --- | 1,10 | down |
| 6279635 | 7297483 | 1615279 | --- | --- | --- | 1,43 | down |
| 6279639 | 7139026 | 1223512 | --- | --- | --- | 1,33 | up   |
| 6279710 | 7161841 | 1279879 | --- | --- | --- | 1,07 | down |
| 6279785 | 7080106 | 1079723 | --- | --- | --- | 1,05 | down |
| 6279847 | 7150348 | 1251421 | --- | --- | --- | 1,07 | down |
| 6279915 | 7107926 | 1146837 | --- | --- | --- | 1,09 | down |
| 6280037 | 7180861 | 1327223 | --- | --- | --- | 1,29 | up   |
| 6280259 | 7043535 | 994091  | --- | --- | --- | 1,03 | up   |
| 6280292 | 7031618 | 964198  | --- | --- | --- | 1,64 | down |
| 6280458 | 7119930 | 1177224 | --- | --- | --- | 1,05 | up   |
| 6280500 | 7303616 | 1631355 | --- | --- | --- | 1,06 | down |
| 6280597 | 7141061 | 1228722 | --- | --- | --- | 1,43 | down |
| 6280639 | 7303616 | 1631321 | --- | --- | --- | 1,19 | down |
| 6280755 | 7138255 | 1221709 | --- | --- | --- | 2,78 | down |
| 6280826 | 7247954 | 1492404 | --- | --- | --- | 1,23 | up   |
| 6280922 | 7291054 | 1599390 | --- | --- | --- | 1,06 | down |
| 6280999 | 7248964 | 1494951 | --- | --- | --- | 1,14 | up   |
| 6281004 | 7305674 | 1636854 | --- | --- | --- | 1,28 | up   |
| 6281019 | 7030518 | 961672  | --- | --- | --- | 1,08 | up   |
| 6281031 | 7368004 | 1789330 | --- | --- | --- | 1,01 | down |
| 6281055 | 7236395 | 1464338 | --- | --- | --- | 1,16 | up   |
| 6281088 | 7078666 | 1076514 | --- | --- | --- | 1,05 | up   |
| 6281112 | 7341253 | 1723255 | --- | --- | --- | 1,68 | down |
| 6281196 | 7225553 | 1435990 | --- | --- | --- | 1,10 | down |
| 6281199 | 7243647 | 1482433 | --- | --- | --- | 1,04 | up   |
| 6281203 | 7107926 | 1146833 | --- | --- | --- | 1,18 | down |
| 6281215 | 7331297 | 1698810 | --- | --- | --- | 1,71 | down |
| 6281398 | 7307485 | 1641329 | --- | --- | --- | 1,24 | up   |
| 6281424 | 7032074 | 965639  | --- | --- | --- | 1,08 | up   |
| 6281794 | 7341253 | 1723298 | --- | --- | --- | 1,22 | down |
| 6281803 | 7034756 | 973207  | --- | --- | --- | 1,07 | down |
| 6281836 | 7073950 | 1065867 | --- | --- | --- | 2,43 | up   |
| 6281862 | 7315206 | 1660029 | --- | --- | --- | 1,37 | up   |
| 6281923 | 7358859 | 1766999 | --- | --- | --- | 1,61 | up   |
| 6282099 | 7248790 | 1494488 | --- | --- | --- | 1,01 | down |
| 6282165 | 7235426 | 1461846 | --- | --- | --- | 1,00 | down |
| 6282254 | 7255663 | 1511711 | --- | --- | --- | 1,38 | up   |
| 6282275 | 7313411 | 1655441 | --- | --- | --- | 1,02 | down |
| 6282391 | 7274892 | 1559583 | --- | --- | --- | 1,01 | up   |
| 6282651 | 7060851 | 1033397 | --- | --- | --- | 1,08 | up   |
| 6282678 | 7065655 | 1045248 | --- | --- | --- | 1,19 | up   |
| 6282692 | 7350237 | 1745487 | --- | --- | --- | 1,17 | up   |

|         |         |         |     |     |     |      |      |
|---------|---------|---------|-----|-----|-----|------|------|
| 6282755 | 7363132 | 1776959 | --- | --- | --- | 2,27 | down |
| 6282827 | 7127540 | 1195275 | --- | --- | --- | 1,18 | down |
| 6282928 | 7056333 | 1023705 | --- | --- | --- | 1,25 | up   |
| 6283270 | 7101643 | 1131567 | --- | --- | --- | 1,34 | down |
| 6283323 | 7167507 | 1293119 | --- | --- | --- | 1,12 | up   |
| 6283338 | 7115880 | 1166826 | --- | --- | --- | 1,23 | up   |
| 6283363 | 7243603 | 1482291 | --- | --- | --- | 2,33 | down |
| 6283370 | 7095021 | 1115136 | --- | --- | --- | 1,08 | up   |
| 6283432 | 7307721 | 1642001 | --- | --- | --- | 1,12 | up   |
| 6283473 | 7287222 | 1589737 | --- | --- | --- | 1,05 | up   |
| 6283629 | 7368565 | 1791273 | --- | --- | --- | 1,48 | down |
| 6283830 | 7253408 | 1505955 | --- | --- | --- | 2,06 | down |
| 6283847 | 7080134 | 1079806 | --- | --- | --- | 1,08 | down |
| 6283964 | 7235069 | 1460992 | --- | --- | --- | 1,20 | up   |
| 6284059 | 7321029 | 1674804 | --- | --- | --- | 1,03 | down |
| 6284111 | 7338101 | 1715193 | --- | --- | --- | 1,25 | up   |
| 6284220 | 7136062 | 1216295 | --- | --- | --- | 1,09 | up   |
| 6284244 | 7071714 | 1060351 | --- | --- | --- | 1,15 | down |
| 6284262 | 7290793 | 1598626 | --- | --- | --- | 1,15 | down |
| 6284446 | 7091954 | 1107728 | --- | --- | --- | 1,51 | up   |
| 6284461 | 7253453 | 1506154 | --- | --- | --- | 1,08 | up   |
| 6284604 | 7142693 | 1232470 | --- | --- | --- | 2,08 | down |
| 6284652 | 7324337 | 1682058 | --- | --- | --- | 3,01 | down |
| 6284683 | 7039223 | 983568  | --- | --- | --- | 1,53 | down |
| 6284706 | 7148904 | 1248293 | --- | --- | --- | 1,28 | down |
| 6284907 | 7340838 | 1722066 | --- | --- | --- | 1,44 | down |
| 6284917 | 7096859 | 1119304 | --- | --- | --- | 1,36 | down |
| 6284934 | 7319937 | 1672277 | --- | --- | --- | 1,05 | down |
| 6285032 | 7329135 | 1693491 | --- | --- | --- | 1,04 | down |
| 6285206 | 7148978 | 1248509 | --- | --- | --- | 1,13 | up   |
| 6285305 | 7218728 | 1419916 | --- | --- | --- | 1,25 | down |
| 6285330 | 7236395 | 1464352 | --- | --- | --- | 1,06 | up   |
| 6285353 | 7037764 | 980034  | --- | --- | --- | 1,05 | down |
| 6285361 | 7036412 | 976871  | --- | --- | --- | 1,43 | up   |
| 6285362 | 7049399 | 1008347 | --- | --- | --- | 1,04 | up   |
| 6285412 | 7168519 | 1295885 | --- | --- | --- | 1,52 | down |
| 6285703 | 7279533 | 1571916 | --- | --- | --- | 1,18 | down |
| 6285729 | 7083030 | 1086247 | --- | --- | --- | 1,18 | up   |
| 6285737 | 7360486 | 1771020 | --- | --- | --- | 1,43 | down |
| 6285814 | 7378997 | 1818638 | --- | --- | --- | 1,07 | down |
| 6285839 | 7043535 | 994113  | --- | --- | --- | 1,01 | down |
| 6286120 | 7285897 | 1586640 | --- | --- | --- | 1,18 | down |
| 6286175 | 7231775 | 1452132 | --- | --- | --- | 1,44 | up   |
| 6286304 | 7341002 | 1722532 | --- | --- | --- | 1,23 | up   |
| 6286309 | 7233440 | 1456830 | --- | --- | --- | 1,42 | up   |
| 6286316 | 7367994 | 1789243 | --- | --- | --- | 1,00 | down |
| 6286332 | 7323545 | 1679937 | --- | --- | --- | 1,09 | down |
| 6286370 | 7099156 | 1125634 | --- | --- | --- | 1,40 | down |
| 6286528 | 7123357 | 1185595 | --- | --- | --- | 1,25 | up   |
| 6286737 | 7052813 | 1015929 | --- | --- | --- | 2,46 | down |
| 6286909 | 7339379 | 1718330 | --- | --- | --- | 1,81 | up   |
| 6287161 | 7200996 | 1378150 | --- | --- | --- | 2,12 | up   |
| 6287241 | 7049399 | 1008353 | --- | --- | --- | 2,01 | down |
| 6287399 | 7088489 | 1099520 | --- | --- | --- | 2,29 | up   |
| 6287422 | 7078666 | 1076535 | --- | --- | --- | 1,69 | down |
| 6287440 | 7356115 | 1760128 | --- | --- | --- | 1,20 | down |

|         |         |         |     |     |     |      |      |
|---------|---------|---------|-----|-----|-----|------|------|
| 6287511 | 7098411 | 1123738 | --- | --- | --- | 1,22 | down |
| 6287606 | 7240232 | 1474409 | --- | --- | --- | 1,42 | down |
| 6287608 | 7363922 | 1778856 | --- | --- | --- | 1,06 | up   |
| 6287996 | 7233440 | 1456909 | --- | --- | --- | 1,18 | up   |
| 6288117 | 7065265 | 1044564 | --- | --- | --- | 2,42 | down |
| 6288243 | 7303616 | 1631377 | --- | --- | --- | 1,11 | up   |
| 6288280 | 7360486 | 1770968 | --- | --- | --- | 1,07 | up   |
| 6288312 | 7034756 | 973228  | --- | --- | --- | 1,11 | down |
| 6288326 | 7098126 | 1122979 | --- | --- | --- | 1,27 | up   |
| 6288405 | 7112225 | 1157619 | --- | --- | --- | 1,34 | down |
| 6288417 | 7153589 | 1259085 | --- | --- | --- | 1,54 | up   |
| 6288442 | 7248790 | 1494559 | --- | --- | --- | 1,15 | up   |
| 6288519 | 7064732 | 1042907 | --- | --- | --- | 1,70 | down |
| 6288528 | 7180732 | 1326740 | --- | --- | --- | 1,02 | up   |
| 6288607 | 7049332 | 1008173 | --- | --- | --- | 1,31 | up   |
| 6288656 | 7034756 | 973228  | --- | --- | --- | 1,01 | down |
| 6288729 | 7243653 | 1482533 | --- | --- | --- | 1,26 | up   |
| 6288763 | 7041584 | 989461  | --- | --- | --- | 1,66 | down |
| 6288892 | 7243130 | 1480930 | --- | --- | --- | 1,04 | up   |
| 6288907 | 7029770 | 960154  | --- | --- | --- | 1,33 | up   |
| 6288983 | 7027728 | 956052  | --- | --- | --- | 1,11 | down |
| 6289013 | 7043379 | 993627  | --- | --- | --- | 1,45 | up   |
| 6289077 | 7071616 | 1060071 | --- | --- | --- | 2,01 | down |
| 6289080 | 7025652 | 950253  | --- | --- | --- | 1,01 | up   |
| 6289117 | 7132834 | 1208324 | --- | --- | --- | 1,42 | down |
| 6289340 | 7378997 | 1818679 | --- | --- | --- | 1,11 | up   |
| 6289374 | 7198644 | 1372299 | --- | --- | --- | 1,05 | down |
| 6289484 | 7198210 | 1370967 | --- | --- | --- | 1,81 | down |
| 6289527 | 7144389 | 1236780 | --- | --- | --- | 1,51 | down |
| 6289677 | 7345465 | 1733865 | --- | --- | --- | 1,19 | up   |
| 6289912 | 7382452 | 1826158 | --- | --- | --- | 1,73 | up   |
| 6289951 | 7343122 | 1727725 | --- | --- | --- | 1,24 | up   |
| 6289958 | 7032444 | 966756  | --- | --- | --- | 1,44 | down |
| 6290052 | 7119930 | 1177202 | --- | --- | --- | 1,69 | down |
| 6290191 | 7096589 | 1118509 | --- | --- | --- | 1,12 | down |
| 6290421 | 7136977 | 1218819 | --- | --- | --- | 1,65 | up   |
| 6290478 | 7273251 | 1555959 | --- | --- | --- | 1,20 | down |
| 6290549 | 7059766 | 1030972 | --- | --- | --- | 1,07 | up   |
| 6290565 | 7267802 | 1541815 | --- | --- | --- | 1,22 | down |
| 6290608 | 7231775 | 1452130 | --- | --- | --- | 1,36 | down |
| 6290666 | 7179785 | 1324498 | --- | --- | --- | 1,28 | down |
| 6290739 | 7275103 | 1560183 | --- | --- | --- | 1,19 | down |
| 6290751 | 7099650 | 1126879 | --- | --- | --- | 1,24 | down |
| 6290810 | 7050167 | 1009815 | --- | --- | --- | 1,00 | up   |
| 6290824 | 7253272 | 1505700 | --- | --- | --- | 1,10 | down |
| 6290890 | 7098451 | 1123811 | --- | --- | --- | 1,63 | up   |
| 6290895 | 7247334 | 1490816 | --- | --- | --- | 1,04 | up   |
| 6290915 | 7281923 | 1577700 | --- | --- | --- | 1,17 | up   |
| 6291003 | 7260636 | 1524346 | --- | --- | --- | 1,03 | down |
| 6291086 | 7273744 | 1556989 | --- | --- | --- | 1,85 | down |
| 6291133 | 7039302 | 983850  | --- | --- | --- | 1,27 | up   |
| 6291200 | 7117158 | 1170036 | --- | --- | --- | 1,28 | up   |
| 6291252 | 7148978 | 1248535 | --- | --- | --- | 1,20 | up   |
| 6291391 | 7152038 | 1255394 | --- | --- | --- | 1,29 | up   |
| 6291487 | 7260613 | 1524276 | --- | --- | --- | 1,07 | up   |
| 6291541 | 7358859 | 1766961 | --- | --- | --- | 1,01 | down |

|         |         |         |     |     |     |      |      |
|---------|---------|---------|-----|-----|-----|------|------|
| 6291573 | 7278957 | 1570394 | --- | --- | --- | 1,39 | up   |
| 6291758 | 7038530 | 981861  | --- | --- | --- | 1,19 | up   |
| 6291832 | 7070616 | 1057791 | --- | --- | --- | 1,49 | down |
| 6291894 | 7253408 | 1505953 | --- | --- | --- | 1,39 | up   |
| 6291897 | 7384509 | 1830730 | --- | --- | --- | 1,47 | down |
| 6291899 | 7282343 | 1578679 | --- | --- | --- | 1,01 | up   |
| 6291968 | 7049399 | 1008386 | --- | --- | --- | 1,35 | down |
| 6292022 | 7217747 | 1417482 | --- | --- | --- | 1,01 | down |
| 6292095 | 7143455 | 1234739 | --- | --- | --- | 1,05 | up   |
| 6292285 | 7316644 | 1664018 | --- | --- | --- | 2,85 | down |
| 6292291 | 7041609 | 989561  | --- | --- | --- | 1,03 | up   |
| 6292331 | 7176456 | 1315843 | --- | --- | --- | 1,19 | up   |
| 6292351 | 7103782 | 1136947 | --- | --- | --- | 1,24 | down |
| 6292373 | 7222221 | 1428061 | --- | --- | --- | 1,12 | down |
| 6292386 | 7031325 | 963572  | --- | --- | --- | 2,09 | down |
| 6292409 | 7341394 | 1723612 | --- | --- | --- | 1,61 | down |
| 6292440 | 7315571 | 1660976 | --- | --- | --- | 1,06 | down |
| 6292471 | 7181193 | 1328288 | --- | --- | --- | 1,60 | up   |
| 6292661 | 7373417 | 1805092 | --- | --- | --- | 1,12 | up   |
| 6292800 | 7236987 | 1465738 | --- | --- | --- | 1,27 | down |
| 6292860 | 7334347 | 1705756 | --- | --- | --- | 1,26 | down |
| 6292908 | 7297589 | 1615674 | --- | --- | --- | 1,20 | up   |
| 6292919 | 7282343 | 1578686 | --- | --- | --- | 1,31 | down |
| 6292939 | 7068504 | 1052161 | --- | --- | --- | 1,10 | down |
| 6292971 | 7367971 | 1789126 | --- | --- | --- | 1,27 | up   |
| 6292999 | 7363576 | 1778175 | --- | --- | --- | 2,01 | down |
| 6293083 | 7253272 | 1505574 | --- | --- | --- | 1,04 | up   |
| 6293157 | 7033504 | 969867  | --- | --- | --- | 1,13 | up   |
| 6293172 | 7091954 | 1107704 | --- | --- | --- | 1,05 | down |
| 6293270 | 7334347 | 1705749 | --- | --- | --- | 1,72 | down |
| 6293316 | 7058713 | 1028666 | --- | --- | --- | 1,37 | down |
| 6293326 | 7333462 | 1703637 | --- | --- | --- | 1,16 | down |
| 6293483 | 7236358 | 1464261 | --- | --- | --- | 1,07 | up   |
| 6293570 | 7186305 | 1341002 | --- | --- | --- | 1,38 | down |
| 6293765 | 7156978 | 1268179 | --- | --- | --- | 1,38 | up   |
| 6293778 | 7343052 | 1727504 | --- | --- | --- | 1,01 | down |
| 6293802 | 7041609 | 989582  | --- | --- | --- | 1,47 | down |
| 6293834 | 7376566 | 1812870 | --- | --- | --- | 1,09 | up   |
| 6293872 | 7174149 | 1310535 | --- | --- | --- | 1,01 | up   |
| 6293903 | 7212735 | 1405002 | --- | --- | --- | 1,02 | up   |
| 6294090 | 7153589 | 1259095 | --- | --- | --- | 1,08 | up   |
| 6294134 | 7056333 | 1023672 | --- | --- | --- | 1,31 | down |
| 6294230 | 7267802 | 1541800 | --- | --- | --- | 1,30 | up   |
| 6294323 | 7184850 | 1337612 | --- | --- | --- | 1,10 | up   |
| 6294344 | 7253408 | 1505955 | --- | --- | --- | 1,10 | down |
| 6294445 | 7139026 | 1223496 | --- | --- | --- | 1,05 | up   |
| 6294526 | 7218728 | 1419927 | --- | --- | --- | 2,85 | up   |
| 6294527 | 7254405 | 1508638 | --- | --- | --- | 1,87 | down |
| 6294607 | 7198644 | 1372355 | --- | --- | --- | 1,01 | down |
| 6294643 | 7243647 | 1482465 | --- | --- | --- | 1,25 | down |
| 6294719 | 7070836 | 1058331 | --- | --- | --- | 1,43 | down |
| 6294783 | 7068259 | 1051632 | --- | --- | --- | 1,22 | down |
| 6294814 | 7378997 | 1818649 | --- | --- | --- | 1,23 | down |
| 6294844 | 7218728 | 1419926 | --- | --- | --- | 1,71 | down |
| 6294854 | 7378637 | 1817829 | --- | --- | --- | 1,60 | down |
| 6294883 | 7072754 | 1062665 | --- | --- | --- | 1,11 | down |

|         |         |         |     |     |     |      |      |
|---------|---------|---------|-----|-----|-----|------|------|
| 6294892 | 7170764 | 1301490 | --- | --- | --- | 2,05 | down |
| 6294950 | 7351953 | 1749880 | --- | --- | --- | 1,12 | down |
| 6294951 | 7080106 | 1079718 | --- | --- | --- | 2,07 | down |
| 6295008 | 7287222 | 1589716 | --- | --- | --- | 1,05 | up   |
| 6295229 | 7334347 | 1705779 | --- | --- | --- | 1,34 | down |
| 6295296 | 7365183 | 1781909 | --- | --- | --- | 1,29 | up   |
| 6295348 | 7319065 | 1669976 | --- | --- | --- | 1,12 | down |
| 6295428 | 7036412 | 976856  | --- | --- | --- | 1,03 | up   |
| 6295502 | 7134773 | 1212969 | --- | --- | --- | 6,30 | down |
| 6295509 | 7240232 | 1474428 | --- | --- | --- | 2,05 | down |
| 6295554 | 7356115 | 1760130 | --- | --- | --- | 1,17 | up   |
| 6295625 | 7251608 | 1501455 | --- | --- | --- | 1,03 | up   |
| 6295626 | 7038610 | 982077  | --- | --- | --- | 2,06 | down |
| 6295756 | 7282343 | 1578665 | --- | --- | --- | 1,37 | down |
| 6295979 | 7279568 | 1572027 | --- | --- | --- | 1,03 | down |
| 6295989 | 7360486 | 1770935 | --- | --- | --- | 2,71 | down |
| 6296034 | 7060851 | 1033377 | --- | --- | --- | 1,05 | down |
| 6296045 | 7200545 | 1376928 | --- | --- | --- | 1,20 | up   |
| 6296237 | 7339379 | 1718321 | --- | --- | --- | 1,02 | down |
| 6296245 | 7243130 | 1480906 | --- | --- | --- | 1,40 | up   |
| 6296288 | 7049332 | 1008175 | --- | --- | --- | 1,09 | down |
| 6296308 | 7076236 | 1071183 | --- | --- | --- | 1,26 | up   |
| 6296358 | 7302786 | 1628863 | --- | --- | --- | 1,06 | down |
| 6296389 | 7337224 | 1712602 | --- | --- | --- | 1,03 | up   |
| 6296397 | 7216309 | 1413742 | --- | --- | --- | 1,16 | down |
| 6296440 | 7243653 | 1482554 | --- | --- | --- | 1,69 | down |
| 6296451 | 7277719 | 1567084 | --- | --- | --- | 1,21 | up   |
| 6296510 | 7286807 | 1588830 | --- | --- | --- | 1,06 | down |
| 6296533 | 7146093 | 1240951 | --- | --- | --- | 1,22 | up   |
| 6296541 | 7076236 | 1071196 | --- | --- | --- | 1,07 | down |
| 6296776 | 7043379 | 993638  | --- | --- | --- | 1,05 | down |
| 6297015 | 7279568 | 1572019 | --- | --- | --- | 1,22 | down |
| 6297172 | 7286807 | 1588785 | --- | --- | --- | 1,62 | down |
| 6297553 | 7367994 | 1789244 | --- | --- | --- | 1,24 | up   |
| 6297555 | 7065655 | 1045243 | --- | --- | --- | 2,25 | down |
| 6297562 | 7351951 | 1749848 | --- | --- | --- | 1,33 | down |
| 6297582 | 7032204 | 966174  | --- | --- | --- | 1,34 | up   |
| 6297646 | 7316644 | 1664007 | --- | --- | --- | 1,04 | down |
| 6297667 | 7336727 | 1711288 | --- | --- | --- | 1,09 | up   |
| 6297782 | 7169599 | 1298449 | --- | --- | --- | 1,15 | down |
| 6297819 | 7041584 | 989458  | --- | --- | --- | 1,95 | up   |
| 6297915 | 7338807 | 1716820 | --- | --- | --- | 1,02 | down |
| 6297966 | 7098867 | 1124950 | --- | --- | --- | 1,10 | up   |
| 6298001 | 7240569 | 1475375 | --- | --- | --- | 1,35 | up   |
| 6298006 | 7107926 | 1146832 | --- | --- | --- | 1,13 | down |
| 6298103 | 7119930 | 1177215 | --- | --- | --- | 1,18 | down |
| 6298155 | 7303616 | 1631368 | --- | --- | --- | 1,05 | up   |
| 6298165 | 7070836 | 1058354 | --- | --- | --- | 1,33 | up   |
| 6298295 | 7156114 | 1266043 | --- | --- | --- | 1,37 | down |
| 6298301 | 7359453 | 1768450 | --- | --- | --- | 1,20 | down |
| 6298452 | 7098077 | 1122807 | --- | --- | --- | 1,29 | down |
| 6298635 | 7284153 | 1583018 | --- | --- | --- | 1,30 | up   |
| 6298821 | 7093936 | 1112477 | --- | --- | --- | 1,28 | up   |
| 6298905 | 7266706 | 1538746 | --- | --- | --- | 2,96 | down |
| 6298907 | 7088432 | 1099412 | --- | --- | --- | 1,28 | down |
| 6298917 | 7052933 | 1016212 | --- | --- | --- | 1,03 | up   |

|         |         |         |     |     |     |      |      |
|---------|---------|---------|-----|-----|-----|------|------|
| 6298929 | 7243363 | 1481587 | --- | --- | --- | 1,26 | up   |
| 6298972 | 7174149 | 1310490 | --- | --- | --- | 1,14 | up   |
| 6299063 | 7341397 | 1723622 | --- | --- | --- | 1,01 | up   |
| 6299087 | 7062927 | 1038630 | --- | --- | --- | 1,11 | up   |
| 6299208 | 7243647 | 1482445 | --- | --- | --- | 1,28 | down |
| 6299333 | 7287222 | 1589739 | --- | --- | --- | 1,12 | up   |
| 6299394 | 7338101 | 1715190 | --- | --- | --- | 2,15 | down |
| 6299420 | 7130889 | 1203863 | --- | --- | --- | 1,14 | down |
| 6299428 | 7088625 | 1099869 | --- | --- | --- | 1,03 | down |
| 6299459 | 7193644 | 1359709 | --- | --- | --- | 1,30 | down |
| 6299462 | 7193987 | 1360670 | --- | --- | --- | 1,09 | up   |
| 6299505 | 7340838 | 1722084 | --- | --- | --- | 1,09 | down |
| 6299533 | 7330238 | 1695937 | --- | --- | --- | 1,17 | down |
| 6299582 | 7281950 | 1577782 | --- | --- | --- | 1,30 | up   |
| 6299588 | 7231203 | 1450473 | --- | --- | --- | 1,03 | down |
| 6299604 | 7240569 | 1475363 | --- | --- | --- | 1,00 | up   |
| 6299625 | 7112225 | 1157576 | --- | --- | --- | 1,00 | up   |
| 6299761 | 7297589 | 1615681 | --- | --- | --- | 1,11 | up   |
| 6299815 | 7083021 | 1086215 | --- | --- | --- | 1,23 | up   |
| 6299817 | 7276650 | 1564134 | --- | --- | --- | 1,09 | up   |
| 6300208 | 7073577 | 1064761 | --- | --- | --- | 1,10 | up   |
| 6300277 | 7036412 | 976853  | --- | --- | --- | 1,02 | down |
| 6300374 | 7301022 | 1624253 | --- | --- | --- | 1,22 | down |
| 6300403 | 7099517 | 1126495 | --- | --- | --- | 1,17 | down |
| 6300458 | 7374740 | 1808620 | --- | --- | --- | 1,01 | down |
| 6300569 | 7025652 | 950338  | --- | --- | --- | 1,64 | down |
| 6300680 | 7229856 | 1447073 | --- | --- | --- | 1,00 | up   |
| 6300704 | 7117187 | 1170159 | --- | --- | --- | 1,00 | up   |
| 6300758 | 7068259 | 1051618 | --- | --- | --- | 1,78 | down |
| 6300762 | 7176177 | 1315139 | --- | --- | --- | 1,31 | up   |
| 6300933 | 7279533 | 1571916 | --- | --- | --- | 1,11 | up   |
| 6300988 | 7287337 | 1589970 | --- | --- | --- | 1,36 | down |
| 6301175 | 7233440 | 1456866 | --- | --- | --- | 1,04 | up   |
| 6301181 | 7343122 | 1727729 | --- | --- | --- | 1,25 | up   |
| 6301245 | 7356333 | 1760498 | --- | --- | --- | 1,10 | up   |
| 6301305 | 7067670 | 1050319 | --- | --- | --- | 1,07 | down |
| 6301337 | 7248964 | 1494938 | --- | --- | --- | 1,44 | down |
| 6301342 | 7156052 | 1265759 | --- | --- | --- | 1,14 | up   |
| 6301409 | 7213908 | 1407693 | --- | --- | --- | 1,52 | up   |
| 6301582 | 7234040 | 1458501 | --- | --- | --- | 1,02 | up   |
| 6301652 | 7141061 | 1228644 | --- | --- | --- | 1,01 | down |
| 6301684 | 7330238 | 1695963 | --- | --- | --- | 1,16 | down |
| 6301703 | 7359426 | 1768381 | --- | --- | --- | 1,28 | down |
| 6301711 | 7062173 | 1037000 | --- | --- | --- | 1,12 | up   |
| 6301722 | 7115362 | 1165603 | --- | --- | --- | 1,12 | up   |
| 6301743 | 7353441 | 1753333 | --- | --- | --- | 1,20 | up   |
| 6301840 | 7360486 | 1770936 | --- | --- | --- | 1,22 | down |
| 6302252 | 7248964 | 1494945 | --- | --- | --- | 1,08 | up   |
| 6302470 | 7332970 | 1702533 | --- | --- | --- | 1,19 | down |
| 6302593 | 7240569 | 1475470 | --- | --- | --- | 1,16 | up   |
| 6302706 | 7225553 | 1435986 | --- | --- | --- | 1,01 | down |
| 6302729 | 7361223 | 1772624 | --- | --- | --- | 1,01 | up   |
| 6302763 | 7196029 | 1365624 | --- | --- | --- | 1,05 | down |
| 6302787 | 7097525 | 1121069 | --- | --- | --- | 2,10 | down |
| 6302910 | 7211389 | 1402113 | --- | --- | --- | 1,55 | down |
| 6302936 | 7342959 | 1727351 | --- | --- | --- | 1,13 | up   |



|         |         |         |     |     |     |      |      |
|---------|---------|---------|-----|-----|-----|------|------|
| 6302977 | 7334347 | 1705749 | --- | --- | --- | 1,68 | down |
| 6303012 | 7037764 | 979972  | --- | --- | --- | 1,29 | down |
| 6303020 | 7193987 | 1360668 | --- | --- | --- | 1,11 | down |
| 6303043 | 7200545 | 1376916 | --- | --- | --- | 1,47 | up   |
| 6303316 | 7185483 | 1338929 | --- | --- | --- | 1,24 | up   |
| 6303361 | 7243130 | 1480815 | --- | --- | --- | 1,08 | up   |
| 6303447 | 7342959 | 1727341 | --- | --- | --- | 1,24 | down |
| 6303475 | 7368004 | 1789332 | --- | --- | --- | 1,05 | up   |
| 6303628 | 7228656 | 1444247 | --- | --- | --- | 1,22 | up   |
| 6303655 | 7307721 | 1642000 | --- | --- | --- | 1,18 | down |
| 6303712 | 7290793 | 1598640 | --- | --- | --- | 1,16 | up   |
| 6303888 | 7280743 | 1574569 | --- | --- | --- | 1,57 | up   |
| 6304004 | 7065266 | 1044596 | --- | --- | --- | 1,02 | down |
| 6304005 | 7146093 | 1240932 | --- | --- | --- | 1,39 | up   |
| 6304143 | 7279073 | 1570679 | --- | --- | --- | 1,93 | down |
| 6304160 | 7029770 | 960151  | --- | --- | --- | 1,01 | up   |
| 6304197 | 7212718 | 1404970 | --- | --- | --- | 1,10 | down |
| 6304221 | 7311218 | 1650354 | --- | --- | --- | 1,12 | down |
| 6304338 | 7188138 | 1345032 | --- | --- | --- | 1,08 | down |
| 6304425 | 7281950 | 1577785 | --- | --- | --- | 1,18 | up   |
| 6304495 | 7040260 | 986097  | --- | --- | --- | 1,25 | up   |
| 6304529 | 7156061 | 1265813 | --- | --- | --- | 1,10 | up   |
| 6304548 | 7341253 | 1723292 | --- | --- | --- | 1,34 | up   |
| 6304615 | 7341253 | 1723250 | --- | --- | --- | 1,39 | down |
| 6304699 | 7236395 | 1464352 | --- | --- | --- | 1,19 | down |
| 6304773 | 7358048 | 1764798 | --- | --- | --- | 1,11 | up   |
| 6304818 | 7093936 | 1112473 | --- | --- | --- | 1,16 | up   |
| 6304832 | 7097485 | 1120943 | --- | --- | --- | 1,30 | up   |
| 6304966 | 7198210 | 1371007 | --- | --- | --- | 1,14 | up   |
| 6304987 | 7385253 | 1832225 | --- | --- | --- | 1,97 | down |
| 6305040 | 7071969 | 1060900 | --- | --- | --- | 1,31 | down |
| 6305285 | 7272110 | 1553031 | --- | --- | --- | 1,05 | up   |
| 6305359 | 7235069 | 1460989 | --- | --- | --- | 1,03 | up   |
| 6305422 | 7197056 | 1367834 | --- | --- | --- | 1,28 | down |
| 6305434 | 7027759 | 956122  | --- | --- | --- | 1,01 | down |
| 6305558 | 7280743 | 1574475 | --- | --- | --- | 1,30 | up   |
| 6305578 | 7059584 | 1030546 | --- | --- | --- | 1,06 | down |
| 6305589 | 7280743 | 1574506 | --- | --- | --- | 1,22 | down |
| 6305612 | 7341002 | 1722547 | --- | --- | --- | 1,33 | up   |
| 6305655 | 7339379 | 1718325 | --- | --- | --- | 1,38 | up   |
| 6305751 | 7060851 | 1033368 | --- | --- | --- | 1,20 | down |
| 6305778 | 7249503 | 1496238 | --- | --- | --- | 1,45 | up   |
| 6305780 | 7196029 | 1365630 | --- | --- | --- | 1,41 | up   |
| 6305926 | 7080731 | 1080976 | --- | --- | --- | 1,16 | up   |
| 6306031 | 7363768 | 1778603 | --- | --- | --- | 1,17 | down |
| 6306120 | 7338807 | 1716784 | --- | --- | --- | 1,35 | up   |
| 6306292 | 7276231 | 1563117 | --- | --- | --- | 1,19 | down |
| 6306323 | 7243130 | 1480901 | --- | --- | --- | 1,44 | down |
| 6306341 | 7325674 | 1685220 | --- | --- | --- | 1,08 | down |
| 6306371 | 7254040 | 1507596 | --- | --- | --- | 1,13 | up   |
| 6306438 | 7321465 | 1675745 | --- | --- | --- | 1,16 | up   |
| 6306496 | 7131360 | 1204973 | --- | --- | --- | 1,16 | down |
| 6306643 | 7215722 | 1412264 | --- | --- | --- | 1,30 | down |
| 6306669 | 7117526 | 1171004 | --- | --- | --- | 1,16 | down |
| 6306998 | 7367994 | 1789246 | --- | --- | --- | 1,63 | down |
| 6307056 | 7232029 | 1452789 | --- | --- | --- | 1,19 | up   |

|         |         |         |     |     |     |      |      |
|---------|---------|---------|-----|-----|-----|------|------|
| 6307112 | 7081368 | 1082369 | --- | --- | --- | 1,06 | down |
| 6307192 | 7181016 | 1327788 | --- | --- | --- | 1,10 | up   |
| 6307350 | 7359659 | 1768821 | --- | --- | --- | 1,20 | up   |
| 6307437 | 7092549 | 1109189 | --- | --- | --- | 1,03 | down |
| 6307499 | 7280743 | 1574480 | --- | --- | --- | 1,00 | down |
| 6307554 | 7363674 | 1778435 | --- | --- | --- | 1,52 | up   |
| 6307636 | 7211363 | 1402042 | --- | --- | --- | 1,28 | up   |
| 6307652 | 7301140 | 1624584 | --- | --- | --- | 1,46 | down |
| 6307654 | 7216132 | 1413398 | --- | --- | --- | 2,30 | down |
| 6307663 | 7057966 | 1026820 | --- | --- | --- | 1,07 | up   |
| 6307725 | 7319937 | 1672254 | --- | --- | --- | 1,14 | up   |
| 6307757 | 7280743 | 1574568 | --- | --- | --- | 1,23 | down |
| 6307830 | 7234195 | 1458981 | --- | --- | --- | 2,46 | down |
| 6307839 | 7213908 | 1407647 | --- | --- | --- | 1,14 | down |
| 6307857 | 7336931 | 1711864 | --- | --- | --- | 1,00 | down |
| 6307885 | 7345465 | 1733844 | --- | --- | --- | 1,07 | down |
| 6308155 | 7336250 | 1710171 | --- | --- | --- | 1,01 | down |
| 6308250 | 7087282 | 1096217 | --- | --- | --- | 1,07 | down |
| 6308280 | 7065655 | 1045259 | --- | --- | --- | 1,34 | down |
| 6308299 | 7115362 | 1165598 | --- | --- | --- | 1,48 | down |
| 6308314 | 7140113 | 1226054 | --- | --- | --- | 1,67 | down |
| 6308333 | 7244290 | 1484162 | --- | --- | --- | 1,26 | up   |
| 6308345 | 7248790 | 1494531 | --- | --- | --- | 1,60 | up   |
| 6308446 | 7378602 | 1817713 | --- | --- | --- | 1,06 | down |
| 6308511 | 7087805 | 1097458 | --- | --- | --- | 1,17 | down |
| 6308583 | 7222221 | 1428061 | --- | --- | --- | 1,13 | down |
| 6308601 | 7213908 | 1407672 | --- | --- | --- | 1,05 | up   |
| 6308625 | 7297483 | 1615277 | --- | --- | --- | 1,11 | up   |
| 6308636 | 7339732 | 1719240 | --- | --- | --- | 1,17 | down |
| 6308641 | 7092406 | 1108786 | --- | --- | --- | 1,12 | down |
| 6308653 | 7275208 | 1560479 | --- | --- | --- | 1,35 | up   |
| 6308756 | 7319937 | 1672320 | --- | --- | --- | 1,24 | down |
| 6308792 | 7097680 | 1121736 | --- | --- | --- | 1,27 | down |
| 6308880 | 7131550 | 1205551 | --- | --- | --- | 1,57 | up   |
| 6308933 | 7037764 | 979977  | --- | --- | --- | 1,01 | down |
| 6308982 | 7343052 | 1727539 | --- | --- | --- | 1,94 | up   |
| 6309076 | 7049399 | 1008357 | --- | --- | --- | 1,12 | down |
| 6309122 | 7267802 | 1541741 | --- | --- | --- | 1,49 | down |
| 6309259 | 7360486 | 1770957 | --- | --- | --- | 1,42 | down |
| 6309317 | 7243363 | 1481628 | --- | --- | --- | 1,35 | down |
| 6309371 | 7131889 | 1206090 | --- | --- | --- | 1,49 | up   |
| 6309372 | 7312566 | 1653300 | --- | --- | --- | 1,02 | down |
| 6309395 | 7330396 | 1696336 | --- | --- | --- | 1,20 | up   |
| 6309455 | 7059716 | 1030833 | --- | --- | --- | 1,18 | down |
| 6309535 | 7231775 | 1452133 | --- | --- | --- | 1,17 | up   |
| 6309571 | 7043535 | 994166  | --- | --- | --- | 3,06 | up   |
| 6309597 | 7054958 | 1020574 | --- | --- | --- | 1,03 | down |
| 6309662 | 7107321 | 1145324 | --- | --- | --- | 1,13 | up   |
| 6309683 | 7178060 | 1320170 | --- | --- | --- | 1,10 | up   |
| 6309771 | 7263152 | 1530388 | --- | --- | --- | 1,16 | down |
| 6309826 | 7054147 | 1018975 | --- | --- | --- | 1,50 | down |
| 6309858 | 7213908 | 1407690 | --- | --- | --- | 1,15 | down |
| 6310025 | 7361223 | 1772619 | --- | --- | --- | 1,04 | down |
| 6310092 | 7225553 | 1435985 | --- | --- | --- | 1,64 | up   |
| 6310136 | 7099271 | 1125922 | --- | --- | --- | 1,56 | up   |
| 6310159 | 7276650 | 1564139 | --- | --- | --- | 1,18 | up   |

|         |         |         |     |     |     |      |      |
|---------|---------|---------|-----|-----|-----|------|------|
| 6310219 | 7381352 | 1823743 | --- | --- | --- | 1,08 | up   |
| 6310261 | 7323545 | 1679957 | --- | --- | --- | 1,27 | up   |
| 6310282 | 7037764 | 980055  | --- | --- | --- | 1,15 | up   |
| 6310307 | 7099973 | 1127535 | --- | --- | --- | 1,36 | down |
| 6310347 | 7236991 | 1465785 | --- | --- | --- | 1,98 | down |
| 6310367 | 7228530 | 1443903 | --- | --- | --- | 1,12 | down |
| 6310452 | 7240206 | 1474349 | --- | --- | --- | 1,20 | down |
| 6310492 | 7192696 | 1357181 | --- | --- | --- | 1,25 | up   |
| 6310576 | 7212718 | 1404970 | --- | --- | --- | 1,58 | down |
| 6310761 | 7182133 | 1330843 | --- | --- | --- | 1,74 | down |
| 6310775 | 7360486 | 1771014 | --- | --- | --- | 1,16 | down |
| 6310863 | 7274892 | 1559580 | --- | --- | --- | 1,32 | down |
| 6310886 | 7098366 | 1123612 | --- | --- | --- | 1,45 | down |
| 6310971 | 7384365 | 1830276 | --- | --- | --- | 1,06 | up   |
| 6310974 | 7142416 | 1231792 | --- | --- | --- | 1,25 | up   |
| 6311001 | 7243130 | 1480870 | --- | --- | --- | 1,46 | up   |
| 6311039 | 7278957 | 1570393 | --- | --- | --- | 2,07 | up   |
| 6311061 | 7043535 | 994165  | --- | --- | --- | 1,42 | up   |
| 6311111 | 7119179 | 1174992 | --- | --- | --- | 1,08 | up   |
| 6311200 | 7086966 | 1095257 | --- | --- | --- | 1,25 | up   |
| 6311239 | 7073854 | 1065631 | --- | --- | --- | 1,39 | down |
| 6311246 | 7279533 | 1571917 | --- | --- | --- | 1,05 | down |
| 6311432 | 7367748 | 1788261 | --- | --- | --- | 1,02 | down |
| 6311457 | 7245921 | 1487686 | --- | --- | --- | 1,30 | down |
| 6311476 | 7286807 | 1588820 | --- | --- | --- | 1,16 | up   |
| 6311515 | 7176456 | 1315830 | --- | --- | --- | 1,23 | up   |
| 6311613 | 7364948 | 1781228 | --- | --- | --- | 1,02 | up   |
| 6311831 | 7112225 | 1157535 | --- | --- | --- | 1,39 | up   |
| 6311875 | 7166497 | 1290342 | --- | --- | --- | 1,00 | up   |
| 6311988 | 7307485 | 1641384 | --- | --- | --- | 1,04 | up   |
| 6312121 | 7185315 | 1338604 | --- | --- | --- | 1,16 | up   |
| 6312160 | 7236395 | 1464326 | --- | --- | --- | 1,05 | up   |
| 6312176 | 7199476 | 1374535 | --- | --- | --- | 1,02 | up   |
| 6312213 | 7243647 | 1482429 | --- | --- | --- | 1,56 | down |
| 6312423 | 7241163 | 1476819 | --- | --- | --- | 1,53 | up   |
| 6312590 | 7078666 | 1076507 | --- | --- | --- | 1,30 | up   |
| 6312662 | 7349882 | 1744783 | --- | --- | --- | 1,20 | down |
| 6312715 | 7165954 | 1288770 | --- | --- | --- | 1,54 | down |
| 6312717 | 7376820 | 1813394 | --- | --- | --- | 1,40 | up   |
| 6312720 | 7284359 | 1583436 | --- | --- | --- | 1,15 | down |
| 6312740 | 7193056 | 1358266 | --- | --- | --- | 1,30 | down |
| 6312743 | 7178060 | 1320180 | --- | --- | --- | 1,00 | down |
| 6312747 | 7343868 | 1729856 | --- | --- | --- | 1,19 | down |
| 6312750 | 7355244 | 1758140 | --- | --- | --- | 1,67 | up   |
| 6312913 | 7280743 | 1574534 | --- | --- | --- | 1,21 | up   |
| 6312954 | 7341546 | 1723950 | --- | --- | --- | 1,45 | down |
| 6312955 | 7384509 | 1830725 | --- | --- | --- | 1,42 | up   |
| 6313035 | 7039302 | 983843  | --- | --- | --- | 1,22 | up   |
| 6313202 | 7088489 | 1099529 | --- | --- | --- | 1,00 | down |
| 6313210 | 7363576 | 1778195 | --- | --- | --- | 1,65 | up   |
| 6313309 | 7060851 | 1033409 | --- | --- | --- | 1,24 | up   |
| 6313396 | 7217747 | 1417498 | --- | --- | --- | 1,52 | down |
| 6313429 | 7293454 | 1604953 | --- | --- | --- | 1,16 | down |
| 6313508 | 7378997 | 1818655 | --- | --- | --- | 1,16 | up   |
| 6313722 | 7243130 | 1480878 | --- | --- | --- | 1,11 | up   |
| 6313790 | 7257361 | 1516098 | --- | --- | --- | 1,01 | down |

|         |         |         |     |     |     |      |      |
|---------|---------|---------|-----|-----|-----|------|------|
| 6313802 | 7243647 | 1482479 | --- | --- | --- | 1,04 | up   |
| 6313846 | 7333152 | 1702954 | --- | --- | --- | 1,47 | up   |
| 6313876 | 7088135 | 1098419 | --- | --- | --- | 1,01 | down |
| 6313974 | 7236358 | 1464255 | --- | --- | --- | 2,09 | up   |
| 6313976 | 7330078 | 1695475 | --- | --- | --- | 1,02 | down |
| 6313977 | 7243647 | 1482488 | --- | --- | --- | 1,02 | up   |
| 6314015 | 7076236 | 1071197 | --- | --- | --- | 1,48 | down |
| 6314021 | 7238202 | 1468949 | --- | --- | --- | 1,07 | up   |
| 6314050 | 7127691 | 1195630 | --- | --- | --- | 1,08 | down |
| 6314117 | 7180732 | 1326728 | --- | --- | --- | 1,44 | down |
| 6314156 | 7108551 | 1148701 | --- | --- | --- | 1,33 | up   |
| 6314288 | 7099573 | 1126711 | --- | --- | --- | 1,01 | up   |
| 6314320 | 7339110 | 1717612 | --- | --- | --- | 2,07 | up   |
| 6314374 | 7183182 | 1333564 | --- | --- | --- | 1,30 | up   |
| 6314378 | 7378997 | 1818676 | --- | --- | --- | 1,11 | up   |
| 6314748 | 7198690 | 1372546 | --- | --- | --- | 1,86 | down |
| 6314836 | 7217143 | 1415586 | --- | --- | --- | 2,54 | down |
| 6314858 | 7041061 | 988074  | --- | --- | --- | 1,15 | down |
| 6315073 | 7102976 | 1135049 | --- | --- | --- | 1,09 | up   |
| 6315179 | 7374842 | 1808990 | --- | --- | --- | 1,31 | up   |
| 6315238 | 7239752 | 1473197 | --- | --- | --- | 1,29 | up   |
| 6315526 | 7210600 | 1400518 | --- | --- | --- | 1,02 | down |
| 6315575 | 7068853 | 1053129 | --- | --- | --- | 1,24 | down |
| 6315642 | 7378997 | 1818640 | --- | --- | --- | 1,02 | up   |
| 6315684 | 7148978 | 1248541 | --- | --- | --- | 1,02 | down |
| 6315705 | 7233359 | 1456518 | --- | --- | --- | 1,39 | up   |
| 6315727 | 7360486 | 1770959 | --- | --- | --- | 1,75 | down |
| 6315733 | 7342959 | 1727344 | --- | --- | --- | 1,28 | up   |
| 6315737 | 7343052 | 1727507 | --- | --- | --- | 1,13 | down |
| 6315785 | 7067670 | 1050366 | --- | --- | --- | 1,09 | up   |
| 6315899 | 7309703 | 1646838 | --- | --- | --- | 1,15 | up   |
| 6315946 | 7350993 | 1747557 | --- | --- | --- | 1,63 | down |
| 6315950 | 7352044 | 1750003 | --- | --- | --- | 1,16 | up   |
| 6316023 | 7333462 | 1703646 | --- | --- | --- | 1,07 | up   |
| 6316061 | 7360325 | 1770493 | --- | --- | --- | 1,02 | up   |
| 6316066 | 7374790 | 1808765 | --- | --- | --- | 1,14 | up   |
| 6316122 | 7313411 | 1655450 | --- | --- | --- | 1,45 | up   |
| 6316242 | 7132125 | 1206640 | --- | --- | --- | 1,08 | up   |
| 6316265 | 7240569 | 1475464 | --- | --- | --- | 1,15 | down |
| 6316276 | 7053874 | 1018322 | --- | --- | --- | 1,24 | up   |
| 6316418 | 7351951 | 1749837 | --- | --- | --- | 1,03 | up   |
| 6316567 | 7209927 | 1398936 | --- | --- | --- | 1,06 | down |
| 6316625 | 7307485 | 1641331 | --- | --- | --- | 1,17 | down |
| 6316701 | 7068086 | 1051203 | --- | --- | --- | 1,02 | up   |
| 6316723 | 7206133 | 1389978 | --- | --- | --- | 2,31 | down |
| 6316771 | 7188685 | 1346323 | --- | --- | --- | 1,22 | up   |
| 6316788 | 7309703 | 1646825 | --- | --- | --- | 1,05 | down |
| 6316827 | 7141061 | 1228643 | --- | --- | --- | 1,35 | down |
| 6317012 | 7274780 | 1559239 | --- | --- | --- | 1,09 | down |
| 6317149 | 7378981 | 1818552 | --- | --- | --- | 1,29 | down |
| 6317368 | 7341397 | 1723629 | --- | --- | --- | 1,10 | down |
| 6317377 | 7076160 | 1070882 | --- | --- | --- | 1,88 | up   |
| 6317409 | 7279568 | 1572032 | --- | --- | --- | 1,22 | up   |
| 6317544 | 7353712 | 1753946 | --- | --- | --- | 1,24 | down |
| 6317651 | 7380019 | 1820830 | --- | --- | --- | 1,08 | up   |
| 6317796 | 7292517 | 1602557 | --- | --- | --- | 1,03 | up   |

|         |         |         |     |     |     |      |      |
|---------|---------|---------|-----|-----|-----|------|------|
| 6318034 | 7058713 | 1028669 | --- | --- | --- | 1,14 | up   |
| 6318179 | 7084193 | 1089070 | --- | --- | --- | 1,99 | down |
| 6318305 | 7069830 | 1055590 | --- | --- | --- | 2,09 | down |
| 6318376 | 7117526 | 1170978 | --- | --- | --- | 2,02 | up   |
| 6318425 | 7373678 | 1805865 | --- | --- | --- | 1,01 | down |
| 6318485 | 7367990 | 1789225 | --- | --- | --- | 1,56 | up   |
| 6318575 | 7202550 | 1381604 | --- | --- | --- | 1,61 | down |
| 6318675 | 7038530 | 981880  | --- | --- | --- | 1,17 | up   |
| 6318852 | 7075445 | 1069343 | --- | --- | --- | 1,31 | up   |
| 6318869 | 7285897 | 1586638 | --- | --- | --- | 1,09 | up   |
| 6318948 | 7069830 | 1055624 | --- | --- | --- | 1,21 | up   |
| 6319242 | 7139708 | 1225051 | --- | --- | --- | 1,02 | down |
| 6319388 | 7379957 | 1820643 | --- | --- | --- | 1,03 | down |
| 6319462 | 7040260 | 986084  | --- | --- | --- | 1,03 | up   |
| 6319471 | 7087965 | 1098063 | --- | --- | --- | 1,25 | down |
| 6319506 | 7330396 | 1696343 | --- | --- | --- | 1,21 | up   |
| 6319521 | 7092549 | 1109186 | --- | --- | --- | 1,92 | down |
| 6319720 | 7339387 | 1718395 | --- | --- | --- | 1,04 | up   |
| 6319772 | 7088625 | 1099881 | --- | --- | --- | 1,13 | down |
| 6319777 | 7141421 | 1229479 | --- | --- | --- | 2,76 | down |
| 6319788 | 7049399 | 1008364 | --- | --- | --- | 1,01 | up   |
| 6319817 | 7036412 | 976868  | --- | --- | --- | 1,05 | down |
| 6319897 | 7211389 | 1402112 | --- | --- | --- | 1,55 | up   |
| 6319945 | 7053874 | 1018321 | --- | --- | --- | 1,26 | down |
| 6320001 | 7266706 | 1538753 | --- | --- | --- | 1,06 | down |
| 6320033 | 7141061 | 1228697 | --- | --- | --- | 1,37 | down |
| 6320148 | 7033672 | 970335  | --- | --- | --- | 1,05 | down |
| 6320178 | 7127540 | 1195273 | --- | --- | --- | 1,29 | up   |
| 6320263 | 7303616 | 1631330 | --- | --- | --- | 1,23 | up   |
| 6320264 | 7228656 | 1444247 | --- | --- | --- | 1,22 | up   |
| 6320268 | 7039223 | 983564  | --- | --- | --- | 1,07 | down |
| 6320332 | 7211363 | 1402052 | --- | --- | --- | 1,51 | up   |
| 6320351 | 7083031 | 1086280 | --- | --- | --- | 2,01 | down |
| 6320354 | 7330238 | 1695931 | --- | --- | --- | 1,02 | up   |
| 6320401 | 7247334 | 1490817 | --- | --- | --- | 3,03 | up   |
| 6320468 | 7214605 | 1409373 | --- | --- | --- | 1,30 | down |
| 6320528 | 7253272 | 1505690 | --- | --- | --- | 1,80 | up   |
| 6320544 | 7350489 | 1746115 | --- | --- | --- | 1,38 | up   |
| 6320718 | 7310670 | 1648983 | --- | --- | --- | 1,58 | down |
| 6320861 | 7279303 | 1571206 | --- | --- | --- | 1,29 | down |
| 6320909 | 7188829 | 1346668 | --- | --- | --- | 1,03 | down |
| 6320986 | 7099573 | 1126706 | --- | --- | --- | 1,20 | down |
| 6321162 | 7036412 | 976849  | --- | --- | --- | 1,02 | up   |
| 6321174 | 7358859 | 1767000 | --- | --- | --- | 1,08 | down |
| 6321254 | 7212718 | 1404944 | --- | --- | --- | 1,08 | up   |
| 6321354 | 7214605 | 1409405 | --- | --- | --- | 2,29 | down |
| 6321372 | 7157341 | 1269171 | --- | --- | --- | 1,10 | up   |
| 6321486 | 7132125 | 1206602 | --- | --- | --- | 1,62 | down |
| 6321508 | 7127691 | 1195638 | --- | --- | --- | 1,27 | up   |
| 6321518 | 7267802 | 1541753 | --- | --- | --- | 1,26 | down |
| 6321576 | 7331297 | 1698801 | --- | --- | --- | 1,49 | down |
| 6321689 | 7155116 | 1263437 | --- | --- | --- | 1,09 | up   |
| 6321693 | 7193056 | 1358262 | --- | --- | --- | 1,15 | up   |
| 6321723 | 7307424 | 1641142 | --- | --- | --- | 1,05 | up   |
| 6321787 | 7115880 | 1166838 | --- | --- | --- | 1,07 | up   |
| 6321864 | 7216309 | 1413742 | --- | --- | --- | 1,02 | up   |

|         |         |         |     |     |     |      |      |
|---------|---------|---------|-----|-----|-----|------|------|
| 6321949 | 7177180 | 1317778 | --- | --- | --- | 1,15 | down |
| 6322157 | 7198210 | 1370963 | --- | --- | --- | 1,56 | up   |
| 6322231 | 7080106 | 1079748 | --- | --- | --- | 1,11 | down |
| 6322350 | 7243647 | 1482422 | --- | --- | --- | 2,49 | up   |
| 6322356 | 7111181 | 1155224 | --- | --- | --- | 1,42 | down |
| 6322369 | 7197056 | 1367847 | --- | --- | --- | 1,02 | down |
| 6322485 | 7105814 | 1141775 | --- | --- | --- | 1,03 | down |
| 6322490 | 7240569 | 1475455 | --- | --- | --- | 1,00 | up   |
| 6322501 | 7364346 | 1779969 | --- | --- | --- | 1,16 | down |
| 6322520 | 7162144 | 1280518 | --- | --- | --- | 1,18 | up   |
| 6322540 | 7343092 | 1727649 | --- | --- | --- | 1,01 | up   |
| 6322601 | 7049399 | 1008379 | --- | --- | --- | 1,13 | up   |
| 6322636 | 7149817 | 1250308 | --- | --- | --- | 1,14 | up   |
| 6322910 | 7112225 | 1157616 | --- | --- | --- | 1,08 | up   |
| 6322915 | 7331297 | 1698821 | --- | --- | --- | 1,32 | up   |
| 6322932 | 7256191 | 1512880 | --- | --- | --- | 1,28 | up   |
| 6322946 | 7041584 | 989452  | --- | --- | --- | 1,36 | up   |
| 6323008 | 7086044 | 1092939 | --- | --- | --- | 2,30 | down |
| 6323010 | 7060851 | 1033415 | --- | --- | --- | 1,73 | up   |
| 6323011 | 7334347 | 1705767 | --- | --- | --- | 1,24 | down |
| 6323145 | 7099573 | 1126739 | --- | --- | --- | 1,55 | down |
| 6323218 | 7142416 | 1231818 | --- | --- | --- | 1,12 | up   |
| 6323245 | 7052331 | 1014599 | --- | --- | --- | 1,14 | down |
| 6323256 | 7050930 | 1011611 | --- | --- | --- | 2,26 | down |
| 6323278 | 7112570 | 1158683 | --- | --- | --- | 1,46 | down |
| 6323330 | 7237992 | 1468284 | --- | --- | --- | 1,17 | down |
| 6323358 | 7099449 | 1126374 | --- | --- | --- | 1,09 | down |
| 6323364 | 7297589 | 1615681 | --- | --- | --- | 1,66 | up   |
| 6323440 | 7244288 | 1484107 | --- | --- | --- | 1,58 | up   |
| 6323557 | 7059584 | 1030548 | --- | --- | --- | 1,26 | down |
| 6323577 | 7212735 | 1405027 | --- | --- | --- | 1,01 | down |
| 6323616 | 7129841 | 1200834 | --- | --- | --- | 1,32 | up   |
| 6323621 | 7235069 | 1460989 | --- | --- | --- | 1,13 | down |
| 6323639 | 7217650 | 1417161 | --- | --- | --- | 1,52 | up   |
| 6323647 | 7315571 | 1660977 | --- | --- | --- | 1,28 | up   |
| 6323780 | 7181590 | 1329429 | --- | --- | --- | 2,47 | down |
| 6323808 | 7264085 | 1532719 | --- | --- | --- | 1,66 | up   |
| 6323873 | 7243253 | 1481224 | --- | --- | --- | 1,15 | down |
| 6323898 | 7108345 | 1148084 | --- | --- | --- | 1,55 | down |
| 6323911 | 7297589 | 1615598 | --- | --- | --- | 1,07 | up   |
| 6323957 | 7352100 | 1750206 | --- | --- | --- | 1,15 | down |
| 6324070 | 7095021 | 1115137 | --- | --- | --- | 1,42 | up   |
| 6324184 | 7380497 | 1821831 | --- | --- | --- | 1,05 | down |
| 6324220 | 7332970 | 1702533 | --- | --- | --- | 1,06 | down |
| 6324224 | 7363568 | 1778132 | --- | --- | --- | 1,05 | up   |
| 6324427 | 7300906 | 1624053 | --- | --- | --- | 1,32 | up   |
| 6324450 | 7267802 | 1541787 | --- | --- | --- | 1,00 | down |
| 6324497 | 7378524 | 1817520 | --- | --- | --- | 1,08 | up   |
| 6324573 | 7238115 | 1468655 | --- | --- | --- | 1,09 | up   |
| 6324691 | 7098366 | 1123608 | --- | --- | --- | 1,18 | up   |
| 6324729 | 7373657 | 1805795 | --- | --- | --- | 1,10 | down |
| 6324839 | 7155116 | 1263421 | --- | --- | --- | 1,02 | down |
| 6324841 | 7319259 | 1670404 | --- | --- | --- | 1,01 | up   |
| 6324885 | 7301140 | 1624590 | --- | --- | --- | 1,05 | down |
| 6324948 | 7148978 | 1248506 | --- | --- | --- | 1,42 | up   |
| 6325007 | 7254088 | 1507737 | --- | --- | --- | 1,03 | up   |

|         |         |         |     |     |     |      |      |
|---------|---------|---------|-----|-----|-----|------|------|
| 6325049 | 7096924 | 1119625 | --- | --- | --- | 1,25 | down |
| 6325091 | 7318596 | 1668937 | --- | --- | --- | 1,19 | down |
| 6325110 | 7233359 | 1456505 | --- | --- | --- | 2,36 | up   |
| 6325256 | 7034603 | 972861  | --- | --- | --- | 1,20 | up   |
| 6325272 | 7235393 | 1461720 | --- | --- | --- | 2,83 | down |
| 6325282 | 7356333 | 1760497 | --- | --- | --- | 1,22 | down |
| 6325306 | 7191983 | 1355173 | --- | --- | --- | 1,24 | up   |
| 6325313 | 7149817 | 1250302 | --- | --- | --- | 1,24 | down |
| 6325365 | 7280743 | 1574547 | --- | --- | --- | 1,13 | up   |
| 6325501 | 7065827 | 1045724 | --- | --- | --- | 1,17 | up   |
| 6325561 | 7165954 | 1288770 | --- | --- | --- | 1,38 | up   |
| 6325612 | 7233359 | 1456518 | --- | --- | --- | 1,06 | up   |
| 6325620 | 7240569 | 1475452 | --- | --- | --- | 1,03 | down |
| 6325668 | 7031774 | 964776  | --- | --- | --- | 1,13 | up   |
| 6325674 | 7139026 | 1223494 | --- | --- | --- | 1,04 | up   |
| 6325721 | 7033504 | 969862  | --- | --- | --- | 1,04 | up   |
| 6325816 | 7069464 | 1054671 | --- | --- | --- | 1,33 | down |
| 6325969 | 7034293 | 971932  | --- | --- | --- | 1,01 | up   |
| 6326023 | 7068073 | 1051176 | --- | --- | --- | 1,14 | down |
| 6326117 | 7065827 | 1045728 | --- | --- | --- | 1,01 | up   |
| 6326171 | 7123421 | 1185841 | --- | --- | --- | 1,48 | up   |
| 6326374 | 7167507 | 1293129 | --- | --- | --- | 1,14 | up   |
| 6326405 | 7054636 | 1019874 | --- | --- | --- | 1,27 | up   |
| 6326563 | 7095021 | 1115131 | --- | --- | --- | 1,02 | up   |
| 6326649 | 7316644 | 1664040 | --- | --- | --- | 1,22 | down |
| 6326657 | 7243130 | 1480848 | --- | --- | --- | 1,31 | up   |
| 6326743 | 7141061 | 1228643 | --- | --- | --- | 1,29 | up   |
| 6326760 | 7350489 | 1746122 | --- | --- | --- | 2,02 | up   |
| 6326846 | 7092549 | 1109144 | --- | --- | --- | 1,04 | down |
| 6326904 | 7286807 | 1588827 | --- | --- | --- | 1,02 | down |
| 6326942 | 7059020 | 1029342 | --- | --- | --- | 1,52 | up   |
| 6326943 | 7149817 | 1250307 | --- | --- | --- | 1,68 | up   |
| 6327042 | 7373678 | 1805876 | --- | --- | --- | 1,06 | up   |
| 6327090 | 7284359 | 1583435 | --- | --- | --- | 1,06 | down |
| 6327104 | 7364346 | 1780006 | --- | --- | --- | 1,13 | up   |
| 6327143 | 7254040 | 1507591 | --- | --- | --- | 1,03 | down |
| 6327168 | 7082098 | 1084123 | --- | --- | --- | 1,25 | down |
| 6327295 | 7071714 | 1060356 | --- | --- | --- | 1,21 | up   |
| 6327320 | 7131360 | 1204979 | --- | --- | --- | 1,15 | down |
| 6327328 | 7072552 | 1062129 | --- | --- | --- | 1,48 | down |
| 6327419 | 7373633 | 1805711 | --- | --- | --- | 1,13 | up   |
| 6327475 | 7293234 | 1604333 | --- | --- | --- | 1,04 | down |
| 6327589 | 7188822 | 1346625 | --- | --- | --- | 1,08 | down |
| 6327625 | 7231775 | 1452135 | --- | --- | --- | 1,26 | up   |
| 6327822 | 7281923 | 1577699 | --- | --- | --- | 1,01 | up   |
| 6327885 | 7323522 | 1679830 | --- | --- | --- | 1,09 | up   |
| 6327926 | 7351953 | 1749875 | --- | --- | --- | 1,02 | up   |
| 6327930 | 7339379 | 1718310 | --- | --- | --- | 1,46 | down |
| 6327937 | 7323545 | 1679956 | --- | --- | --- | 1,21 | down |
| 6327964 | 7050557 | 1010796 | --- | --- | --- | 1,06 | up   |
| 6328032 | 7243653 | 1482538 | --- | --- | --- | 1,31 | up   |
| 6328076 | 7213908 | 1407688 | --- | --- | --- | 1,04 | down |
| 6328225 | 7064134 | 1041425 | --- | --- | --- | 1,20 | up   |
| 6328259 | 7053874 | 1018310 | --- | --- | --- | 1,22 | down |
| 6328348 | 7249503 | 1496165 | --- | --- | --- | 1,10 | up   |
| 6328349 | 7092549 | 1109153 | --- | --- | --- | 1,14 | up   |

|         |         |         |     |     |     |      |      |
|---------|---------|---------|-----|-----|-----|------|------|
| 6328440 | 7189669 | 1348981 | --- | --- | --- | 1,28 | down |
| 6328525 | 7088489 | 1099521 | --- | --- | --- | 1,26 | down |
| 6328531 | 7265952 | 1536975 | --- | --- | --- | 1,29 | down |
| 6328569 | 7103337 | 1135943 | --- | --- | --- | 1,03 | down |
| 6328572 | 7240569 | 1475506 | --- | --- | --- | 1,09 | up   |
| 6328583 | 7033672 | 970356  | --- | --- | --- | 1,04 | up   |
| 6328584 | 7294151 | 1606592 | --- | --- | --- | 1,53 | up   |
| 6328586 | 7196029 | 1365616 | --- | --- | --- | 1,27 | down |
| 6328594 | 7330181 | 1695696 | --- | --- | --- | 1,34 | down |
| 6328695 | 7221187 | 1425724 | --- | --- | --- | 1,05 | up   |
| 6328727 | 7351951 | 1749831 | --- | --- | --- | 1,17 | down |
| 6328730 | 7316644 | 1664031 | --- | --- | --- | 1,38 | down |
| 6328808 | 7101362 | 1130827 | --- | --- | --- | 1,18 | down |
| 6328875 | 7258345 | 1518538 | --- | --- | --- | 1,03 | up   |
| 6328942 | 7295410 | 1609792 | --- | --- | --- | 1,15 | up   |
| 6329114 | 7378997 | 1818641 | --- | --- | --- | 1,17 | up   |
| 6329116 | 7036559 | 977253  | --- | --- | --- | 1,26 | down |
| 6329195 | 7029770 | 960156  | --- | --- | --- | 1,06 | down |
| 6329204 | 7292154 | 1601676 | --- | --- | --- | 1,18 | up   |
| 6329234 | 7065115 | 1044178 | --- | --- | --- | 1,08 | down |
| 6329263 | 7087965 | 1098018 | --- | --- | --- | 1,67 | up   |
| 6329275 | 7340304 | 1720864 | --- | --- | --- | 2,40 | down |
| 6329299 | 7233440 | 1456933 | --- | --- | --- | 1,28 | up   |
| 6329394 | 7233359 | 1456507 | --- | --- | --- | 1,22 | down |
| 6329402 | 7260613 | 1524277 | --- | --- | --- | 1,01 | down |
| 6329433 | 7264797 | 1534420 | --- | --- | --- | 1,31 | up   |
| 6329535 | 7038610 | 982071  | --- | --- | --- | 1,20 | down |
| 6329663 | 7065266 | 1044579 | --- | --- | --- | 1,11 | up   |
| 6329800 | 7249917 | 1497392 | --- | --- | --- | 1,69 | up   |
| 6329869 | 7303616 | 1631384 | --- | --- | --- | 1,25 | down |
| 6329935 | 7041609 | 989572  | --- | --- | --- | 1,25 | down |
| 6329946 | 7060195 | 1031959 | --- | --- | --- | 1,03 | down |
| 6329979 | 7096842 | 1119254 | --- | --- | --- | 1,07 | up   |
| 6330028 | 7321029 | 1674816 | --- | --- | --- | 1,06 | up   |
| 6330087 | 7293234 | 1604358 | --- | --- | --- | 2,59 | down |
| 6330113 | 7331297 | 1698809 | --- | --- | --- | 1,02 | down |
| 6330120 | 7225304 | 1435311 | --- | --- | --- | 1,05 | up   |
| 6330152 | 7060851 | 1033434 | --- | --- | --- | 1,81 | down |
| 6330217 | 7116614 | 1168799 | --- | --- | --- | 1,07 | up   |
| 6330373 | 7069253 | 1054166 | --- | --- | --- | 1,44 | up   |
| 6330427 | 7070836 | 1058347 | --- | --- | --- | 1,50 | up   |
| 6330529 | 7368004 | 1789328 | --- | --- | --- | 1,11 | down |
| 6330545 | 7039223 | 983569  | --- | --- | --- | 1,07 | up   |
| 6330661 | 7257963 | 1517683 | --- | --- | --- | 1,13 | down |
| 6330663 | 7213908 | 1407757 | --- | --- | --- | 1,32 | up   |
| 6330743 | 7132125 | 1206606 | --- | --- | --- | 1,00 | up   |
| 6330759 | 7059961 | 1031397 | --- | --- | --- | 1,08 | up   |
| 6330768 | 7146093 | 1240908 | --- | --- | --- | 1,10 | up   |
| 6330772 | 7192696 | 1357182 | --- | --- | --- | 1,06 | down |
| 6330794 | 7033504 | 969858  | --- | --- | --- | 1,55 | down |
| 6330858 | 7265259 | 1535437 | --- | --- | --- | 1,13 | up   |
| 6330911 | 7322260 | 1677067 | --- | --- | --- | 1,02 | down |
| 6330931 | 7142081 | 1230979 | --- | --- | --- | 2,00 | down |
| 6330951 | 7142081 | 1230973 | --- | --- | --- | 1,35 | down |
| 6331098 | 7025652 | 950301  | --- | --- | --- | 1,18 | down |
| 6331151 | 7330396 | 1696341 | --- | --- | --- | 1,17 | up   |



|         |         |         |     |     |     |      |      |
|---------|---------|---------|-----|-----|-----|------|------|
| 6331311 | 7083030 | 1086268 | --- | --- | --- | 1,45 | down |
| 6331318 | 7034293 | 971970  | --- | --- | --- | 1,29 | down |
| 6331336 | 7243363 | 1481594 | --- | --- | --- | 1,04 | up   |
| 6331502 | 7214363 | 1408974 | --- | --- | --- | 1,15 | down |
| 6331713 | 7161841 | 1279878 | --- | --- | --- | 1,32 | up   |
| 6331748 | 7087492 | 1096691 | --- | --- | --- | 1,23 | up   |
| 6331797 | 7245695 | 1487085 | --- | --- | --- | 1,15 | down |
| 6331865 | 7243363 | 1481628 | --- | --- | --- | 1,29 | up   |
| 6331876 | 7287238 | 1589774 | --- | --- | --- | 1,01 | down |
| 6332651 | 7031774 | 964648  | --- | --- | --- | 1,11 | down |
| 6332676 | 7215722 | 1412265 | --- | --- | --- | 1,70 | down |
| 6332721 | 7274780 | 1559211 | --- | --- | --- | 1,11 | down |
| 6332751 | 7356115 | 1760114 | --- | --- | --- | 1,04 | up   |
| 6332775 | 7274780 | 1559214 | --- | --- | --- | 1,17 | up   |
| 6332802 | 7111573 | 1156016 | --- | --- | --- | 1,18 | down |
| 6332804 | 7368006 | 1789357 | --- | --- | --- | 1,08 | up   |
| 6332837 | 7276231 | 1563103 | --- | --- | --- | 1,07 | down |
| 6332873 | 7186464 | 1341379 | --- | --- | --- | 1,04 | up   |
| 6333093 | 7170764 | 1301478 | --- | --- | --- | 1,18 | down |
| 6333105 | 7376566 | 1812849 | --- | --- | --- | 1,67 | up   |
| 6333296 | 7083021 | 1086219 | --- | --- | --- | 1,37 | up   |
| 6333306 | 7147809 | 1245461 | --- | --- | --- | 2,39 | up   |
| 6333319 | 7190534 | 1351225 | --- | --- | --- | 1,23 | up   |
| 6333377 | 7331434 | 1699219 | --- | --- | --- | 1,11 | down |
| 6333384 | 7344530 | 1731561 | --- | --- | --- | 1,09 | down |
| 6333505 | 7120477 | 1178532 | --- | --- | --- | 1,47 | down |
| 6333643 | 7068259 | 1051655 | --- | --- | --- | 1,44 | up   |
| 6333719 | 7248964 | 1494938 | --- | --- | --- | 1,25 | up   |
| 6333815 | 7202550 | 1381614 | --- | --- | --- | 1,04 | down |
| 6333910 | 7344530 | 1731573 | --- | --- | --- | 1,04 | up   |
| 6333921 | 7350237 | 1745487 | --- | --- | --- | 1,10 | down |
| 6333939 | 7096859 | 1119329 | --- | --- | --- | 1,27 | down |
| 6333989 | 7093936 | 1112463 | --- | --- | --- | 1,45 | up   |
| 6333993 | 7172373 | 1305564 | --- | --- | --- | 1,37 | up   |
| 6333996 | 7264797 | 1534422 | --- | --- | --- | 2,07 | down |
| 6334033 | 7335632 | 1708452 | --- | --- | --- | 1,13 | up   |
| 6334034 | 7085848 | 1092432 | --- | --- | --- | 1,02 | down |
| 6334052 | 7112225 | 1157565 | --- | --- | --- | 1,01 | down |
| 6334121 | 7247228 | 1490527 | --- | --- | --- | 1,01 | up   |
| 6334192 | 7131360 | 1204970 | --- | --- | --- | 1,62 | up   |
| 6334352 | 7356115 | 1760122 | --- | --- | --- | 2,53 | up   |
| 6334408 | 7287222 | 1589722 | --- | --- | --- | 1,08 | up   |
| 6334582 | 7067670 | 1050342 | --- | --- | --- | 1,10 | down |
| 6334699 | 7316452 | 1663556 | --- | --- | --- | 1,11 | up   |
| 6334738 | 7117832 | 1171754 | --- | --- | --- | 1,10 | up   |
| 6334751 | 7174149 | 1310496 | --- | --- | --- | 1,04 | down |
| 6335056 | 7067614 | 1050196 | --- | --- | --- | 1,13 | up   |
| 6335057 | 7340757 | 1721901 | --- | --- | --- | 2,16 | down |
| 6335181 | 7270397 | 1548130 | --- | --- | --- | 1,59 | down |
| 6335227 | 7103782 | 1136947 | --- | --- | --- | 1,07 | down |
| 6335387 | 7043535 | 994098  | --- | --- | --- | 1,01 | up   |
| 6335432 | 7172373 | 1305588 | --- | --- | --- | 1,16 | up   |
| 6335507 | 7330238 | 1695925 | --- | --- | --- | 1,74 | down |
| 6335545 | 7338807 | 1716822 | --- | --- | --- | 1,49 | up   |
| 6335605 | 7172066 | 1304736 | --- | --- | --- | 1,95 | down |
| 6335628 | 7183927 | 1335502 | --- | --- | --- | 1,02 | up   |

|         |         |         |     |     |     |      |      |
|---------|---------|---------|-----|-----|-----|------|------|
| 6335630 | 7071714 | 1060354 | --- | --- | --- | 1,03 | down |
| 6335714 | 7345462 | 1733816 | --- | --- | --- | 1,75 | up   |
| 6335718 | 7092965 | 1110186 | --- | --- | --- | 1,05 | up   |
| 6335787 | 7352044 | 1750016 | --- | --- | --- | 1,01 | up   |
| 6336060 | 7096924 | 1119605 | --- | --- | --- | 1,34 | down |
| 6336062 | 7127022 | 1194063 | --- | --- | --- | 2,13 | up   |
| 6336107 | 7367971 | 1789115 | --- | --- | --- | 1,09 | up   |
| 6336141 | 7211343 | 1401973 | --- | --- | --- | 1,05 | up   |
| 6336162 | 7380497 | 1821864 | --- | --- | --- | 1,27 | down |
| 6336170 | 7319937 | 1672268 | --- | --- | --- | 1,14 | up   |
| 6336303 | 7349817 | 1744602 | --- | --- | --- | 1,39 | up   |
| 6336347 | 7340304 | 1720858 | --- | --- | --- | 1,22 | up   |
| 6336352 | 7337224 | 1712625 | --- | --- | --- | 1,33 | up   |
| 6336436 | 7338807 | 1716819 | --- | --- | --- | 1,01 | up   |
| 6336460 | 7191594 | 1354227 | --- | --- | --- | 1,58 | up   |
| 6336494 | 7060851 | 1033418 | --- | --- | --- | 1,03 | up   |
| 6336515 | 7098366 | 1123611 | --- | --- | --- | 1,23 | up   |
| 6336519 | 7247229 | 1490557 | --- | --- | --- | 1,17 | down |
| 6336578 | 7087492 | 1096694 | --- | --- | --- | 1,18 | down |
| 6336647 | 7373906 | 1806365 | --- | --- | --- | 1,03 | down |
| 6336685 | 7368374 | 1790644 | --- | --- | --- | 1,10 | up   |
| 6336759 | 7186688 | 1341842 | --- | --- | --- | 2,20 | up   |
| 6336779 | 7180943 | 1327442 | --- | --- | --- | 1,25 | up   |
| 6336841 | 7148978 | 1248550 | --- | --- | --- | 1,52 | up   |
| 6337008 | 7084716 | 1090109 | --- | --- | --- | 1,94 | down |
| 6337017 | 7070836 | 1058353 | --- | --- | --- | 1,47 | up   |
| 6337153 | 7114108 | 1162456 | --- | --- | --- | 1,03 | up   |
| 6337208 | 7160053 | 1275381 | --- | --- | --- | 1,47 | up   |
| 6337274 | 7127797 | 1195853 | --- | --- | --- | 1,34 | up   |
| 6337445 | 7033672 | 970363  | --- | --- | --- | 1,19 | up   |
| 6337463 | 7244290 | 1484145 | --- | --- | --- | 1,08 | up   |
| 6337504 | 7243647 | 1482434 | --- | --- | --- | 1,06 | up   |
| 6337559 | 7236991 | 1465792 | --- | --- | --- | 1,69 | down |
| 6337566 | 7322388 | 1677328 | --- | --- | --- | 1,18 | up   |
| 6337570 | 7253453 | 1506153 | --- | --- | --- | 1,04 | down |
| 6337588 | 7213945 | 1407830 | --- | --- | --- | 2,02 | up   |
| 6337593 | 7065265 | 1044568 | --- | --- | --- | 1,65 | down |
| 6337628 | 7303616 | 1631385 | --- | --- | --- | 1,09 | up   |
| 6337664 | 7303616 | 1631371 | --- | --- | --- | 1,15 | up   |
| 6337680 | 7199476 | 1374566 | --- | --- | --- | 1,06 | down |
| 6337735 | 7137646 | 1220429 | --- | --- | --- | 2,15 | down |
| 6337798 | 7338807 | 1716809 | --- | --- | --- | 1,02 | down |
| 6337873 | 7058813 | 1028898 | --- | --- | --- | 1,05 | up   |
| 6337891 | 7240569 | 1475369 | --- | --- | --- | 1,72 | up   |
| 6337927 | 7368684 | 1791857 | --- | --- | --- | 2,16 | up   |
| 6338023 | 7330238 | 1695960 | --- | --- | --- | 1,14 | down |
| 6338107 | 7090278 | 1104074 | --- | --- | --- | 1,09 | up   |
| 6338199 | 7115362 | 1165598 | --- | --- | --- | 1,08 | up   |
| 6338213 | 7319292 | 1670483 | --- | --- | --- | 1,03 | down |
| 6338287 | 7181105 | 1327962 | --- | --- | --- | 1,59 | down |
| 6338305 | 7168309 | 1295359 | --- | --- | --- | 1,12 | up   |
| 6338326 | 7203872 | 1384755 | --- | --- | --- | 1,02 | up   |
| 6338459 | 7030454 | 961549  | --- | --- | --- | 1,41 | up   |
| 6338546 | 7307424 | 1641142 | --- | --- | --- | 1,00 | down |
| 6338581 | 7097680 | 1121715 | --- | --- | --- | 1,01 | up   |
| 6338775 | 7367948 | 1788977 | --- | --- | --- | 1,41 | up   |

|         |         |         |     |     |     |      |      |
|---------|---------|---------|-----|-----|-----|------|------|
| 6338777 | 7049118 | 1007800 | --- | --- | --- | 1,13 | up   |
| 6338863 | 7222221 | 1428061 | --- | --- | --- | 1,08 | down |
| 6338888 | 7030518 | 961671  | --- | --- | --- | 1,53 | down |
| 6339001 | 7101564 | 1131388 | --- | --- | --- | 1,16 | down |
| 6339055 | 7373678 | 1805853 | --- | --- | --- | 1,13 | down |
| 6339132 | 7360486 | 1770998 | --- | --- | --- | 1,21 | down |
| 6339208 | 7341002 | 1722551 | --- | --- | --- | 1,19 | up   |
| 6339376 | 7299512 | 1620550 | --- | --- | --- | 1,22 | up   |
| 6339379 | 7051009 | 1011791 | --- | --- | --- | 1,18 | down |
| 6339441 | 7132125 | 1206603 | --- | --- | --- | 1,02 | up   |
| 6339544 | 7314270 | 1657740 | --- | --- | --- | 1,05 | up   |
| 6339626 | 7038530 | 981865  | --- | --- | --- | 1,27 | down |
| 6339728 | 7249737 | 1496749 | --- | --- | --- | 1,13 | down |
| 6339736 | 7100307 | 1128385 | --- | --- | --- | 1,16 | up   |
| 6339936 | 7049399 | 1008405 | --- | --- | --- | 1,08 | down |
| 6339978 | 7181590 | 1329428 | --- | --- | --- | 1,22 | up   |
| 6340030 | 7094139 | 1112898 | --- | --- | --- | 1,64 | down |
| 6340121 | 7238115 | 1468584 | --- | --- | --- | 1,25 | up   |
| 6340238 | 7232340 | 1453517 | --- | --- | --- | 1,19 | up   |
| 6340324 | 7373633 | 1805706 | --- | --- | --- | 1,09 | down |
| 6340364 | 7238252 | 1469294 | --- | --- | --- | 1,08 | up   |
| 6340541 | 7174149 | 1310490 | --- | --- | --- | 1,06 | down |
| 6340549 | 7243130 | 1480846 | --- | --- | --- | 1,14 | up   |
| 6340704 | 7291054 | 1599406 | --- | --- | --- | 1,10 | down |
| 6340869 | 7186464 | 1341360 | --- | --- | --- | 1,02 | down |
| 6340987 | 7264085 | 1532719 | --- | --- | --- | 1,68 | down |
| 6341033 | 7277783 | 1567465 | --- | --- | --- | 1,34 | up   |
| 6341037 | 7234195 | 1458973 | --- | --- | --- | 1,50 | down |
| 6341143 | 7101400 | 1130891 | --- | --- | --- | 1,17 | up   |
| 6341215 | 7240569 | 1475510 | --- | --- | --- | 1,21 | up   |
| 6341326 | 7082098 | 1084109 | --- | --- | --- | 1,12 | up   |
| 6341424 | 7148978 | 1248477 | --- | --- | --- | 1,27 | down |
| 6341540 | 7029770 | 960155  | --- | --- | --- | 2,14 | down |
| 6341683 | 7373417 | 1805096 | --- | --- | --- | 1,43 | down |
| 6341714 | 7073854 | 1065621 | --- | --- | --- | 1,49 | up   |
| 6341767 | 7225553 | 1435989 | --- | --- | --- | 1,03 | down |
| 6341903 | 7318596 | 1668936 | --- | --- | --- | 1,23 | down |
| 6341961 | 7359460 | 1768472 | --- | --- | --- | 1,23 | up   |
| 6341967 | 7337845 | 1714335 | --- | --- | --- | 1,00 | up   |
| 6342036 | 7180732 | 1326739 | --- | --- | --- | 1,00 | up   |
| 6342109 | 7034756 | 973214  | --- | --- | --- | 1,08 | down |
| 6342139 | 7343868 | 1729856 | --- | --- | --- | 1,75 | down |
| 6342141 | 7339379 | 1718316 | --- | --- | --- | 1,29 | up   |
| 6342146 | 7123421 | 1185846 | --- | --- | --- | 1,09 | up   |
| 6342154 | 7036559 | 977245  | --- | --- | --- | 1,06 | down |
| 6342189 | 7112566 | 1158633 | --- | --- | --- | 1,10 | down |
| 6342228 | 7049689 | 1008873 | --- | --- | --- | 1,22 | up   |
| 6342474 | 7088489 | 1099527 | --- | --- | --- | 1,15 | up   |
| 6342574 | 7217269 | 1415906 | --- | --- | --- | 1,09 | down |
| 6342663 | 7073854 | 1065632 | --- | --- | --- | 1,72 | down |
| 6342716 | 7281140 | 1575713 | --- | --- | --- | 2,05 | down |
| 6342820 | 7373678 | 1805879 | --- | --- | --- | 1,48 | down |
| 6343007 | 7253408 | 1505947 | --- | --- | --- | 1,04 | down |
| 6343120 | 7340757 | 1721906 | --- | --- | --- | 1,23 | down |
| 6343228 | 7069830 | 1055622 | --- | --- | --- | 1,14 | up   |
| 6343535 | 7243363 | 1481583 | --- | --- | --- | 1,16 | up   |

|         |         |         |     |     |     |      |      |
|---------|---------|---------|-----|-----|-----|------|------|
| 6343553 | 7361042 | 1772264 | --- | --- | --- | 1,08 | down |
| 6343635 | 7096859 | 1119319 | --- | --- | --- | 1,20 | up   |
| 6343683 | 7056333 | 1023700 | --- | --- | --- | 1,15 | down |
| 6343873 | 7032618 | 967335  | --- | --- | --- | 1,29 | down |
| 6343934 | 7034532 | 972649  | --- | --- | --- | 1,00 | up   |
| 6343960 | 7329846 | 1694988 | --- | --- | --- | 1,14 | up   |
| 6344042 | 7268375 | 1543438 | --- | --- | --- | 1,10 | up   |
| 6344061 | 7107066 | 1144783 | --- | --- | --- | 3,00 | down |
| 6344366 | 7099573 | 1126740 | --- | --- | --- | 1,46 | down |
| 6344751 | 7248790 | 1494545 | --- | --- | --- | 2,35 | down |
| 6344832 | 7233440 | 1456933 | --- | --- | --- | 1,42 | down |
| 6344861 | 7247848 | 1492072 | --- | --- | --- | 1,09 | down |
| 6344915 | 7159027 | 1272731 | --- | --- | --- | 1,52 | up   |
| 6345042 | 7097525 | 1121059 | --- | --- | --- | 1,23 | up   |
| 6345199 | 7244290 | 1484163 | --- | --- | --- | 1,06 | up   |
| 6345281 | 7174149 | 1310512 | --- | --- | --- | 1,73 | down |
| 6345304 | 7218728 | 1419928 | --- | --- | --- | 1,13 | up   |
| 6345352 | 7188822 | 1346630 | --- | --- | --- | 1,22 | up   |
| 6345403 | 7231775 | 1452127 | --- | --- | --- | 1,13 | up   |
| 6345505 | 7037488 | 979280  | --- | --- | --- | 2,65 | down |
| 6345594 | 7073673 | 1065081 | --- | --- | --- | 2,39 | down |
| 6345646 | 7045955 | 1000761 | --- | --- | --- | 4,97 | down |
| 6345653 | 7244290 | 1484145 | --- | --- | --- | 1,14 | up   |
| 6345720 | 7337522 | 1713590 | --- | --- | --- | 1,13 | down |
| 6345734 | 7299512 | 1620551 | --- | --- | --- | 1,47 | up   |
| 6345988 | 7115880 | 1166825 | --- | --- | --- | 1,16 | up   |
| 6345997 | 7181193 | 1328293 | --- | --- | --- | 1,42 | down |
| 6346045 | 7247228 | 1490515 | --- | --- | --- | 1,85 | down |
| 6346075 | 7033672 | 970369  | --- | --- | --- | 1,48 | up   |
| 6346109 | 7275674 | 1561665 | --- | --- | --- | 1,17 | up   |
| 6346169 | 7156044 | 1265710 | --- | --- | --- | 1,33 | down |
| 6346197 | 7243647 | 1482423 | --- | --- | --- | 1,17 | down |
| 6346389 | 7050167 | 1009816 | --- | --- | --- | 1,32 | down |
| 6346394 | 7216132 | 1413399 | --- | --- | --- | 1,30 | up   |
| 6346460 | 7249503 | 1496187 | --- | --- | --- | 1,16 | up   |
| 6346491 | 7244288 | 1484128 | --- | --- | --- | 1,26 | up   |
| 6346539 | 7025652 | 950255  | --- | --- | --- | 1,27 | down |
| 6346626 | 7350237 | 1745498 | --- | --- | --- | 1,24 | up   |
| 6346628 | 7350993 | 1747532 | --- | --- | --- | 1,38 | down |
| 6346645 | 7292657 | 1602839 | --- | --- | --- | 1,45 | up   |
| 6346660 | 7033337 | 969493  | --- | --- | --- | 1,09 | up   |
| 6346676 | 7307485 | 1641334 | --- | --- | --- | 1,45 | down |
| 6346693 | 7109424 | 1151114 | --- | --- | --- | 1,16 | up   |
| 6346757 | 7293454 | 1604952 | --- | --- | --- | 1,17 | up   |
| 6346773 | 7050167 | 1009817 | --- | --- | --- | 1,21 | up   |
| 6346777 | 7174149 | 1310505 | --- | --- | --- | 1,53 | down |
| 6346828 | 7054958 | 1020575 | --- | --- | --- | 1,17 | up   |
| 6346845 | 7032204 | 966119  | --- | --- | --- | 1,03 | down |
| 6346908 | 7059020 | 1029330 | --- | --- | --- | 1,33 | down |
| 6346928 | 7093936 | 1112465 | --- | --- | --- | 1,10 | up   |
| 6346977 | 7377583 | 1815456 | --- | --- | --- | 1,38 | up   |
| 6347004 | 7229886 | 1447150 | --- | --- | --- | 1,20 | down |
| 6347006 | 7031774 | 964650  | --- | --- | --- | 1,20 | down |
| 6347164 | 7280743 | 1574562 | --- | --- | --- | 1,15 | up   |
| 6347189 | 7055781 | 1022264 | --- | --- | --- | 1,13 | up   |
| 6347207 | 7337845 | 1714352 | --- | --- | --- | 1,08 | down |

|         |         |         |     |     |     |      |      |
|---------|---------|---------|-----|-----|-----|------|------|
| 6347214 | 7146093 | 1240983 | --- | --- | --- | 1,16 | up   |
| 6347219 | 7302786 | 1628860 | --- | --- | --- | 2,21 | down |
| 6347314 | 7099573 | 1126707 | --- | --- | --- | 1,13 | down |
| 6347448 | 7217747 | 1417480 | --- | --- | --- | 1,35 | up   |
| 6347520 | 7162144 | 1280509 | --- | --- | --- | 1,06 | up   |
| 6347545 | 7188638 | 1346209 | --- | --- | --- | 1,63 | down |
| 6347574 | 7329135 | 1693497 | --- | --- | --- | 1,39 | down |
| 6347598 | 7059721 | 1030853 | --- | --- | --- | 1,08 | up   |
| 6347604 | 7068143 | 1051297 | --- | --- | --- | 1,18 | up   |
| 6347654 | 7067828 | 1050792 | --- | --- | --- | 1,00 | up   |
| 6347690 | 7186464 | 1341357 | --- | --- | --- | 1,25 | down |
| 6347741 | 7099156 | 1125643 | --- | --- | --- | 1,19 | down |
| 6347866 | 7330396 | 1696367 | --- | --- | --- | 1,02 | up   |
| 6347882 | 7243130 | 1480910 | --- | --- | --- | 1,08 | up   |
| 6347886 | 7280743 | 1574504 | --- | --- | --- | 1,26 | down |
| 6348088 | 7211343 | 1401977 | --- | --- | --- | 1,02 | up   |
| 6348105 | 7368004 | 1789332 | --- | --- | --- | 1,46 | up   |
| 6348145 | 7112566 | 1158632 | --- | --- | --- | 1,03 | down |
| 6348284 | 7249503 | 1496203 | --- | --- | --- | 1,19 | down |
| 6348425 | 7156052 | 1265767 | --- | --- | --- | 1,34 | down |
| 6348484 | 7054958 | 1020588 | --- | --- | --- | 1,32 | down |
| 6348637 | 7197056 | 1367836 | --- | --- | --- | 1,35 | up   |
| 6348667 | 7352635 | 1751446 | --- | --- | --- | 1,34 | up   |
| 6348725 | 7330396 | 1696336 | --- | --- | --- | 1,21 | up   |
| 6348754 | 7299083 | 1619227 | --- | --- | --- | 1,11 | up   |
| 6348763 | 7356027 | 1759985 | --- | --- | --- | 1,19 | down |
| 6348776 | 7369400 | 1793984 | --- | --- | --- | 1,52 | down |
| 6348894 | 7373633 | 1805700 | --- | --- | --- | 1,25 | down |
| 6348947 | 7043535 | 994090  | --- | --- | --- | 1,16 | down |
| 6348963 | 7280743 | 1574525 | --- | --- | --- | 1,12 | up   |
| 6348979 | 7350237 | 1745481 | --- | --- | --- | 1,10 | down |
| 6349004 | 7129696 | 1200586 | --- | --- | --- | 1,23 | up   |
| 6349055 | 7117158 | 1170019 | --- | --- | --- | 1,09 | up   |
| 6349074 | 7339387 | 1718390 | --- | --- | --- | 1,60 | up   |
| 6349207 | 7072765 | 1062735 | --- | --- | --- | 1,05 | down |
| 6349282 | 7039271 | 983713  | --- | --- | --- | 1,20 | down |
| 6349304 | 7373417 | 1805095 | --- | --- | --- | 1,29 | up   |
| 6349345 | 7156052 | 1265766 | --- | --- | --- | 2,41 | down |
| 6349452 | 7049332 | 1008174 | --- | --- | --- | 1,53 | down |
| 6349476 | 7035344 | 974296  | --- | --- | --- | 1,51 | down |
| 6349503 | 7218728 | 1419920 | --- | --- | --- | 1,57 | down |
| 6349557 | 7340838 | 1722089 | --- | --- | --- | 1,18 | up   |
| 6349664 | 7266706 | 1538746 | --- | --- | --- | 1,14 | up   |
| 6349682 | 7096859 | 1119315 | --- | --- | --- | 1,15 | up   |
| 6349740 | 7342959 | 1727340 | --- | --- | --- | 1,00 | down |
| 6349786 | 7308679 | 1644243 | --- | --- | --- | 1,40 | up   |
| 6349861 | 7244378 | 1484395 | --- | --- | --- | 1,22 | down |
| 6349905 | 7255663 | 1511726 | --- | --- | --- | 1,35 | up   |
| 6349979 | 7101400 | 1130918 | --- | --- | --- | 1,14 | down |
| 6350222 | 7213908 | 1407663 | --- | --- | --- | 1,61 | up   |
| 6350305 | 7064220 | 1041763 | --- | --- | --- | 1,04 | down |
| 6350345 | 7373678 | 1805878 | --- | --- | --- | 1,61 | down |
| 6350415 | 7359874 | 1769348 | --- | --- | --- | 2,05 | up   |
| 6350421 | 7127540 | 1195281 | --- | --- | --- | 1,16 | up   |
| 6350429 | 7062173 | 1037017 | --- | --- | --- | 1,14 | up   |
| 6350533 | 7294264 | 1606837 | --- | --- | --- | 1,01 | up   |

|         |         |         |     |     |     |      |      |
|---------|---------|---------|-----|-----|-----|------|------|
| 6350585 | 7344838 | 1732458 | --- | --- | --- | 1,09 | down |
| 6350667 | 7340506 | 1721336 | --- | --- | --- | 1,03 | up   |
| 6350727 | 7339379 | 1718322 | --- | --- | --- | 1,16 | up   |
| 6350751 | 7243653 | 1482535 | --- | --- | --- | 1,26 | down |
| 6350763 | 7095021 | 1115138 | --- | --- | --- | 1,05 | up   |
| 6350797 | 7281950 | 1577786 | --- | --- | --- | 1,11 | up   |
| 6350809 | 7131103 | 1204344 | --- | --- | --- | 1,02 | down |
| 6350919 | 7384073 | 1829467 | --- | --- | --- | 1,23 | up   |
| 6350933 | 7112570 | 1158652 | --- | --- | --- | 1,41 | down |
| 6350972 | 7290793 | 1598636 | --- | --- | --- | 1,67 | up   |
| 6351001 | 7064905 | 1043438 | --- | --- | --- | 1,06 | up   |
| 6351060 | 7376206 | 1811978 | --- | --- | --- | 1,17 | up   |
| 6351180 | 7142081 | 1230958 | --- | --- | --- | 1,01 | up   |
| 6351225 | 7341002 | 1722542 | --- | --- | --- | 1,01 | up   |
| 6351231 | 7210263 | 1399751 | --- | --- | --- | 1,12 | up   |
| 6351348 | 7186464 | 1341373 | --- | --- | --- | 1,31 | up   |
| 6351410 | 7350237 | 1745487 | --- | --- | --- | 1,37 | up   |
| 6351559 | 7346505 | 1736284 | --- | --- | --- | 1,26 | up   |
| 6351590 | 7234434 | 1459441 | --- | --- | --- | 1,12 | up   |
| 6351602 | 7172066 | 1304740 | --- | --- | --- | 1,02 | down |
| 6351624 | 7244290 | 1484153 | --- | --- | --- | 1,45 | down |
| 6351638 | 7248790 | 1494491 | --- | --- | --- | 1,41 | down |
| 6351692 | 7190534 | 1351240 | --- | --- | --- | 2,15 | down |
| 6351733 | 7097485 | 1120944 | --- | --- | --- | 1,07 | down |
| 6351753 | 7198002 | 1370441 | --- | --- | --- | 1,09 | up   |
| 6351759 | 7384509 | 1830737 | --- | --- | --- | 1,00 | up   |
| 6351829 | 7099573 | 1126716 | --- | --- | --- | 1,07 | down |
| 6351876 | 7214605 | 1409368 | --- | --- | --- | 1,73 | down |
| 6351931 | 7099273 | 1125956 | --- | --- | --- | 1,01 | down |
| 6351954 | 7096589 | 1118515 | --- | --- | --- | 1,94 | up   |
| 6351973 | 7363674 | 1778439 | --- | --- | --- | 1,07 | down |
| 6352068 | 7281950 | 1577782 | --- | --- | --- | 1,25 | up   |
| 6352162 | 7161992 | 1280152 | --- | --- | --- | 1,15 | down |
| 6352276 | 7068259 | 1051649 | --- | --- | --- | 1,11 | up   |
| 6352279 | 7157341 | 1269277 | --- | --- | --- | 1,04 | up   |
| 6352325 | 7195903 | 1365338 | --- | --- | --- | 1,61 | up   |
| 6352368 | 7180721 | 1326695 | --- | --- | --- | 1,48 | down |
| 6352375 | 7069464 | 1054665 | --- | --- | --- | 1,42 | down |
| 6352478 | 7263152 | 1530375 | --- | --- | --- | 1,06 | up   |
| 6352537 | 7030518 | 961678  | --- | --- | --- | 1,00 | up   |
| 6352570 | 7190524 | 1351172 | --- | --- | --- | 1,38 | down |
| 6352594 | 7112566 | 1158625 | --- | --- | --- | 1,15 | up   |
| 6352595 | 7257963 | 1517662 | --- | --- | --- | 1,18 | down |
| 6352639 | 7267802 | 1541837 | --- | --- | --- | 1,16 | down |
| 6352781 | 7102708 | 1134323 | --- | --- | --- | 1,57 | up   |
| 6352824 | 7293757 | 1605678 | --- | --- | --- | 1,02 | down |
| 6352841 | 7316644 | 1664055 | --- | --- | --- | 1,05 | up   |
| 6352921 | 7277783 | 1567474 | --- | --- | --- | 1,06 | up   |
| 6352936 | 7318596 | 1668938 | --- | --- | --- | 1,64 | down |
| 6352938 | 7349817 | 1744643 | --- | --- | --- | 1,15 | down |
| 6353020 | 7344838 | 1732451 | --- | --- | --- | 1,41 | up   |
| 6353072 | 7314270 | 1657735 | --- | --- | --- | 1,16 | up   |
| 6353095 | 7213908 | 1407687 | --- | --- | --- | 1,27 | up   |
| 6353125 | 7378997 | 1818637 | --- | --- | --- | 1,16 | up   |
| 6353166 | 7300446 | 1622844 | --- | --- | --- | 1,48 | up   |
| 6353309 | 7202550 | 1381606 | --- | --- | --- | 1,04 | down |

|         |         |         |     |     |     |      |      |
|---------|---------|---------|-----|-----|-----|------|------|
| 6353335 | 7086522 | 1093941 | --- | --- | --- | 1,26 | down |
| 6353347 | 7189689 | 1349038 | --- | --- | --- | 1,07 | down |
| 6353356 | 7212718 | 1404944 | --- | --- | --- | 1,31 | up   |
| 6353383 | 7196803 | 1367343 | --- | --- | --- | 1,32 | up   |
| 6353388 | 7249503 | 1496174 | --- | --- | --- | 1,51 | up   |
| 6353399 | 7240569 | 1475470 | --- | --- | --- | 1,32 | down |
| 6353404 | 7274780 | 1559250 | --- | --- | --- | 1,58 | down |
| 6353426 | 7047524 | 1004659 | --- | --- | --- | 1,09 | down |
| 6353471 | 7245874 | 1487595 | --- | --- | --- | 1,10 | up   |
| 6353479 | 7327169 | 1688466 | --- | --- | --- | 1,63 | up   |
| 6353494 | 7275674 | 1561650 | --- | --- | --- | 1,02 | up   |
| 6353527 | 7176456 | 1315844 | --- | --- | --- | 1,11 | down |
| 6353742 | 7031774 | 964786  | --- | --- | --- | 1,26 | down |
| 6353770 | 7120690 | 1179048 | --- | --- | --- | 1,11 | down |
| 6354058 | 7337902 | 1714546 | --- | --- | --- | 1,01 | down |
| 6354139 | 7226241 | 1437780 | --- | --- | --- | 1,06 | up   |
| 6354356 | 7038669 | 982182  | --- | --- | --- | 1,22 | up   |
| 6354430 | 7037764 | 980095  | --- | --- | --- | 1,49 | down |
| 6354722 | 7087282 | 1096205 | --- | --- | --- | 1,00 | up   |
| 6354864 | 7142693 | 1232471 | --- | --- | --- | 1,30 | down |
| 6354872 | 7180620 | 1326385 | --- | --- | --- | 1,16 | up   |
| 6354875 | 7088164 | 1098492 | --- | --- | --- | 1,15 | up   |
| 6354928 | 7249503 | 1496206 | --- | --- | --- | 1,06 | down |
| 6354968 | 7229886 | 1447162 | --- | --- | --- | 1,32 | up   |
| 6355019 | 7125348 | 1190072 | --- | --- | --- | 1,04 | down |
| 6355087 | 7343122 | 1727751 | --- | --- | --- | 1,39 | up   |
| 6355257 | 7034756 | 973217  | --- | --- | --- | 1,09 | down |
| 6355281 | 7117526 | 1171003 | --- | --- | --- | 1,91 | up   |
| 6355316 | 7052813 | 1015929 | --- | --- | --- | 1,95 | up   |
| 6355326 | 7299083 | 1619242 | --- | --- | --- | 2,45 | up   |
| 6355351 | 7273251 | 1555944 | --- | --- | --- | 1,24 | up   |
| 6355376 | 7033337 | 969519  | --- | --- | --- | 1,47 | down |
| 6355403 | 7287238 | 1589771 | --- | --- | --- | 1,33 | down |
| 6355589 | 7144092 | 1236216 | --- | --- | --- | 2,10 | down |
| 6355661 | 7280959 | 1575041 | --- | --- | --- | 1,05 | up   |
| 6355679 | 7293757 | 1605672 | --- | --- | --- | 1,51 | down |
| 6355825 | 7159027 | 1272719 | --- | --- | --- | 1,08 | down |
| 6355884 | 7228520 | 1443769 | --- | --- | --- | 1,23 | down |
| 6355937 | 7081368 | 1082376 | --- | --- | --- | 1,98 | up   |
| 6356252 | 7333333 | 1703398 | --- | --- | --- | 1,18 | down |
| 6356275 | 7319937 | 1672280 | --- | --- | --- | 1,03 | down |
| 6356306 | 7361223 | 1772622 | --- | --- | --- | 1,19 | down |
| 6356321 | 7233012 | 1455403 | --- | --- | --- | 1,02 | down |
| 6356401 | 7132125 | 1206620 | --- | --- | --- | 1,04 | down |
| 6356403 | 7286807 | 1588780 | --- | --- | --- | 1,16 | down |
| 6356475 | 7032204 | 966151  | --- | --- | --- | 1,03 | down |
| 6356490 | 7240569 | 1475470 | --- | --- | --- | 1,04 | down |
| 6356551 | 7065655 | 1045264 | --- | --- | --- | 1,81 | down |
| 6356605 | 7078273 | 1075822 | --- | --- | --- | 1,33 | down |
| 6356648 | 7230886 | 1449526 | --- | --- | --- | 1,06 | down |
| 6356659 | 7320337 | 1673328 | --- | --- | --- | 1,04 | up   |
| 6356672 | 7031576 | 964108  | --- | --- | --- | 1,11 | down |
| 6356673 | 7043535 | 994083  | --- | --- | --- | 1,07 | up   |
| 6356788 | 7258545 | 1518927 | --- | --- | --- | 1,18 | down |
| 6356934 | 7240569 | 1475510 | --- | --- | --- | 1,13 | up   |
| 6357043 | 7263652 | 1531624 | --- | --- | --- | 1,48 | up   |

|         |         |         |     |     |     |      |      |
|---------|---------|---------|-----|-----|-----|------|------|
| 6357338 | 7321029 | 1674824 | --- | --- | --- | 1,15 | down |
| 6357531 | 7189778 | 1349289 | --- | --- | --- | 1,08 | up   |
| 6357566 | 7039463 | 984244  | --- | --- | --- | 1,26 | down |
| 6357632 | 7214363 | 1408968 | --- | --- | --- | 1,56 | up   |
| 6357645 | 7142081 | 1230958 | --- | --- | --- | 1,10 | down |
| 6357665 | 7287337 | 1589970 | --- | --- | --- | 1,06 | down |
| 6357705 | 7367305 | 1786993 | --- | --- | --- | 1,34 | up   |
| 6357715 | 7352252 | 1750569 | --- | --- | --- | 1,17 | down |
| 6357808 | 7037764 | 980111  | --- | --- | --- | 1,40 | down |
| 6357879 | 7101400 | 1130916 | --- | --- | --- | 1,94 | down |
| 6357893 | 7217269 | 1415916 | --- | --- | --- | 1,14 | down |
| 6357908 | 7327169 | 1688450 | --- | --- | --- | 1,41 | up   |
| 6357930 | 7208330 | 1395091 | --- | --- | --- | 2,39 | down |
| 6357954 | 7373634 | 1805721 | --- | --- | --- | 1,41 | up   |
| 6357986 | 7072552 | 1062127 | --- | --- | --- | 1,13 | up   |
| 6358036 | 7031774 | 964760  | --- | --- | --- | 1,03 | down |
| 6358141 | 7139026 | 1223514 | --- | --- | --- | 1,35 | up   |
| 6358148 | 7217747 | 1417474 | --- | --- | --- | 1,01 | down |
| 6358158 | 7258670 | 1519337 | --- | --- | --- | 1,12 | up   |
| 6358203 | 7092965 | 1110160 | --- | --- | --- | 1,19 | down |
| 6358230 | 7325416 | 1684601 | --- | --- | --- | 1,02 | down |
| 6358311 | 7038316 | 981459  | --- | --- | --- | 1,26 | down |
| 6358380 | 7150631 | 1252179 | --- | --- | --- | 1,16 | down |
| 6358402 | 7367969 | 1789095 | --- | --- | --- | 1,27 | up   |
| 6358557 | 7168858 | 1296835 | --- | --- | --- | 1,32 | up   |
| 6358642 | 7067556 | 1050047 | --- | --- | --- | 1,01 | up   |
| 6358668 | 7181105 | 1327965 | --- | --- | --- | 2,04 | down |
| 6358676 | 7316644 | 1664000 | --- | --- | --- | 1,00 | up   |
| 6358782 | 7089238 | 1101612 | --- | --- | --- | 1,01 | up   |
| 6358866 | 7233970 | 1458274 | --- | --- | --- | 1,24 | up   |
| 6359004 | 7312627 | 1653490 | --- | --- | --- | 1,15 | down |
| 6359142 | 7376206 | 1811973 | --- | --- | --- | 1,15 | down |
| 6359262 | 7240665 | 1475833 | --- | --- | --- | 1,18 | up   |
| 6359296 | 7240665 | 1475825 | --- | --- | --- | 1,16 | down |
| 6359312 | 7210387 | 1400042 | --- | --- | --- | 2,01 | up   |
| 6359332 | 7136977 | 1218808 | --- | --- | --- | 1,18 | down |
| 6359376 | 7059584 | 1030555 | --- | --- | --- | 1,61 | down |
| 6359406 | 7098411 | 1123690 | --- | --- | --- | 1,02 | down |
| 6359433 | 7070836 | 1058352 | --- | --- | --- | 1,47 | down |
| 6359518 | 7180620 | 1326389 | --- | --- | --- | 1,10 | down |
| 6359527 | 7384073 | 1829454 | --- | --- | --- | 1,52 | down |
| 6359542 | 7056304 | 1023547 | --- | --- | --- | 1,61 | down |
| 6359650 | 7105814 | 1141785 | --- | --- | --- | 1,13 | down |
| 6359653 | 7279568 | 1572012 | --- | --- | --- | 1,02 | up   |
| 6359690 | 7268457 | 1543637 | --- | --- | --- | 1,67 | up   |
| 6359728 | 7076236 | 1071215 | --- | --- | --- | 1,61 | up   |
| 6359814 | 7384509 | 1830742 | --- | --- | --- | 1,07 | down |
| 6359839 | 7117526 | 1171003 | --- | --- | --- | 1,05 | down |
| 6360068 | 7161841 | 1279878 | --- | --- | --- | 1,00 | down |
| 6360098 | 7240569 | 1475404 | --- | --- | --- | 1,69 | down |
| 6360139 | 7123357 | 1185605 | --- | --- | --- | 1,00 | up   |
| 6360371 | 7064905 | 1043437 | --- | --- | --- | 1,10 | down |
| 6360405 | 7197638 | 1369573 | --- | --- | --- | 1,54 | up   |
| 6360470 | 7189689 | 1349051 | --- | --- | --- | 1,25 | down |
| 6360647 | 7116614 | 1168788 | --- | --- | --- | 1,02 | up   |
| 6360684 | 7032444 | 966765  | --- | --- | --- | 1,20 | up   |



|         |         |         |     |     |     |      |      |
|---------|---------|---------|-----|-----|-----|------|------|
| 6360693 | 7071969 | 1060903 | --- | --- | --- | 1,05 | down |
| 6360720 | 7167823 | 1293894 | --- | --- | --- | 1,22 | down |
| 6360822 | 7280743 | 1574537 | --- | --- | --- | 2,32 | down |
| 6360860 | 7084993 | 1090692 | --- | --- | --- | 1,11 | down |
| 6360889 | 7311218 | 1650352 | --- | --- | --- | 1,16 | down |
| 6361131 | 7243130 | 1480840 | --- | --- | --- | 1,33 | down |
| 6361140 | 7287222 | 1589744 | --- | --- | --- | 1,41 | up   |
| 6361144 | 7323522 | 1679867 | --- | --- | --- | 1,01 | up   |
| 6361229 | 7155116 | 1263411 | --- | --- | --- | 1,28 | down |
| 6361303 | 7330238 | 1695942 | --- | --- | --- | 1,55 | down |
| 6361372 | 7180243 | 1325504 | --- | --- | --- | 1,42 | down |
| 6361397 | 7330727 | 1697139 | --- | --- | --- | 1,70 | down |
| 6361449 | 7361223 | 1772627 | --- | --- | --- | 1,12 | down |
| 6361507 | 7193056 | 1358288 | --- | --- | --- | 1,05 | up   |
| 6361570 | 7098451 | 1123824 | --- | --- | --- | 1,33 | up   |
| 6361660 | 7064134 | 1041426 | --- | --- | --- | 1,31 | up   |
| 6361663 | 7284359 | 1583436 | --- | --- | --- | 1,18 | down |
| 6361746 | 7108300 | 1147904 | --- | --- | --- | 2,64 | up   |
| 6361818 | 7111244 | 1155382 | --- | --- | --- | 1,32 | up   |
| 6361967 | 7118356 | 1173132 | --- | --- | --- | 1,23 | down |
| 6362083 | 7370412 | 1796838 | --- | --- | --- | 1,08 | down |
| 6362100 | 7281507 | 1576700 | --- | --- | --- | 1,12 | down |
| 6362104 | 7257976 | 1517712 | --- | --- | --- | 1,55 | down |
| 6362128 | 7321029 | 1674833 | --- | --- | --- | 1,39 | up   |
| 6362177 | 7168858 | 1296820 | --- | --- | --- | 1,23 | down |
| 6362191 | 7231835 | 1452286 | --- | --- | --- | 1,15 | down |
| 6362253 | 7117526 | 1171034 | --- | --- | --- | 1,02 | down |
| 6362302 | 7353712 | 1753965 | --- | --- | --- | 1,05 | up   |
| 6362537 | 7339379 | 1718328 | --- | --- | --- | 1,04 | down |
| 6362584 | 7032395 | 966581  | --- | --- | --- | 1,05 | up   |
| 6362608 | 7286807 | 1588841 | --- | --- | --- | 1,23 | up   |
| 6362650 | 7328920 | 1693020 | --- | --- | --- | 1,08 | up   |
| 6362691 | 7065265 | 1044572 | --- | --- | --- | 1,22 | up   |
| 6362742 | 7344530 | 1731571 | --- | --- | --- | 1,13 | down |
| 6362758 | 7351951 | 1749830 | --- | --- | --- | 1,05 | up   |
| 6362846 | 7238202 | 1468951 | --- | --- | --- | 1,23 | down |
| 6362932 | 7294264 | 1606838 | --- | --- | --- | 1,63 | up   |
| 6362952 | 7049118 | 1007791 | --- | --- | --- | 1,02 | up   |
| 6363055 | 7351951 | 1749832 | --- | --- | --- | 1,11 | down |
| 6363229 | 7364346 | 1779981 | --- | --- | --- | 1,09 | up   |
| 6363245 | 7286807 | 1588811 | --- | --- | --- | 1,19 | up   |
| 6363367 | 7349804 | 1744567 | --- | --- | --- | 1,11 | up   |
| 6363422 | 7202550 | 1381609 | --- | --- | --- | 1,15 | up   |
| 6363482 | 7078666 | 1076513 | --- | --- | --- | 1,12 | up   |
| 6363594 | 7146093 | 1240956 | --- | --- | --- | 1,33 | up   |
| 6363640 | 7162144 | 1280516 | --- | --- | --- | 1,61 | up   |
| 6363820 | 7068853 | 1053114 | --- | --- | --- | 1,12 | down |
| 6364022 | 7319259 | 1670398 | --- | --- | --- | 1,13 | down |
| 6364039 | 7243130 | 1480926 | --- | --- | --- | 1,16 | down |
| 6364069 | 7330238 | 1695926 | --- | --- | --- | 1,00 | down |
| 6364106 | 7181193 | 1328297 | --- | --- | --- | 1,21 | down |
| 6364132 | 7344530 | 1731557 | --- | --- | --- | 1,05 | up   |
| 6364200 | 7165954 | 1288770 | --- | --- | --- | 1,13 | down |
| 6364259 | 7350993 | 1747512 | --- | --- | --- | 1,55 | down |
| 6364275 | 7143240 | 1234175 | --- | --- | --- | 1,10 | down |
| 6364443 | 7152726 | 1257078 | --- | --- | --- | 2,11 | down |

|         |         |         |     |     |     |      |      |
|---------|---------|---------|-----|-----|-----|------|------|
| 6364488 | 7267802 | 1541834 | --- | --- | --- | 1,25 | down |
| 6364522 | 7190844 | 1352169 | --- | --- | --- | 1,37 | down |
| 6364566 | 7100257 | 1128220 | --- | --- | --- | 1,21 | up   |
| 6364846 | 7127257 | 1194801 | --- | --- | --- | 1,43 | up   |
| 6364884 | 7099573 | 1126728 | --- | --- | --- | 1,49 | up   |
| 6364945 | 7043379 | 993652  | --- | --- | --- | 1,20 | down |
| 6364969 | 7255522 | 1511389 | --- | --- | --- | 1,09 | up   |
| 6365038 | 7095021 | 1115134 | --- | --- | --- | 1,27 | down |
| 6365106 | 7277783 | 1567464 | --- | --- | --- | 2,74 | down |
| 6365176 | 7109373 | 1150986 | --- | --- | --- | 1,13 | up   |
| 6365222 | 7186443 | 1341311 | --- | --- | --- | 1,18 | up   |
| 6365223 | 7041609 | 989579  | --- | --- | --- | 1,10 | down |
| 6365245 | 7159036 | 1272963 | --- | --- | --- | 1,01 | down |
| 6365395 | 7330727 | 1697143 | --- | --- | --- | 1,06 | down |
| 6365398 | 7198325 | 1371352 | --- | --- | --- | 3,11 | down |
| 6365430 | 7082574 | 1085138 | --- | --- | --- | 1,09 | down |
| 6365444 | 7071681 | 1060283 | --- | --- | --- | 1,09 | up   |
| 6365522 | 7291032 | 1599331 | --- | --- | --- | 1,02 | up   |
| 6365590 | 7157341 | 1269245 | --- | --- | --- | 1,89 | down |
| 6365735 | 7126658 | 1193170 | --- | --- | --- | 1,43 | up   |
| 6366034 | 7371253 | 1799568 | --- | --- | --- | 1,05 | up   |
| 6366052 | 7086966 | 1095282 | --- | --- | --- | 1,11 | down |
| 6366171 | 7060851 | 1033362 | --- | --- | --- | 1,34 | down |
| 6366180 | 7307721 | 1641997 | --- | --- | --- | 1,00 | up   |
| 6366198 | 7274892 | 1559541 | --- | --- | --- | 1,10 | up   |
| 6366259 | 7350993 | 1747550 | --- | --- | --- | 1,06 | down |
| 6366371 | 7183182 | 1333580 | --- | --- | --- | 1,08 | up   |
| 6366415 | 7031774 | 964768  | --- | --- | --- | 1,20 | down |
| 6366703 | 7099517 | 1126486 | --- | --- | --- | 1,09 | down |
| 6366862 | 7323545 | 1679954 | --- | --- | --- | 1,14 | down |
| 6367052 | 7217747 | 1417503 | --- | --- | --- | 1,06 | up   |
| 6367111 | 7277719 | 1567090 | --- | --- | --- | 2,07 | down |
| 6367210 | 7069464 | 1054666 | --- | --- | --- | 1,02 | up   |
| 6367216 | 7180861 | 1327184 | --- | --- | --- | 1,04 | down |
| 6367247 | 7312575 | 1653362 | --- | --- | --- | 1,14 | up   |
| 6367268 | 7323545 | 1679985 | --- | --- | --- | 1,61 | down |
| 6367353 | 7287222 | 1589723 | --- | --- | --- | 1,24 | down |
| 6367394 | 7061550 | 1035279 | --- | --- | --- | 1,87 | down |
| 6367396 | 7183927 | 1335498 | --- | --- | --- | 1,02 | up   |
| 6367473 | 7034603 | 972868  | --- | --- | --- | 1,14 | up   |
| 6367476 | 7328695 | 1692381 | --- | --- | --- | 1,07 | up   |
| 6367583 | 7060851 | 1033359 | --- | --- | --- | 1,05 | down |
| 6367679 | 7350489 | 1746120 | --- | --- | --- | 1,05 | down |
| 6367808 | 7043379 | 993595  | --- | --- | --- | 1,35 | down |
| 6367816 | 7243647 | 1482451 | --- | --- | --- | 1,19 | up   |
| 6367833 | 7153589 | 1259068 | --- | --- | --- | 1,43 | down |
| 6367835 | 7344406 | 1731265 | --- | --- | --- | 1,10 | up   |
| 6367893 | 7190317 | 1350514 | --- | --- | --- | 1,00 | up   |
| 6367902 | 7098366 | 1123609 | --- | --- | --- | 1,07 | up   |
| 6368094 | 7245695 | 1487060 | --- | --- | --- | 1,08 | up   |
| 6368210 | 7049399 | 1008384 | --- | --- | --- | 1,20 | down |
| 6368224 | 7297523 | 1615430 | --- | --- | --- | 2,00 | up   |
| 6368263 | 7025652 | 950318  | --- | --- | --- | 1,01 | down |
| 6368270 | 7203872 | 1384768 | --- | --- | --- | 1,05 | up   |
| 6368295 | 7144389 | 1236782 | --- | --- | --- | 1,04 | up   |
| 6368310 | 7200545 | 1376933 | --- | --- | --- | 1,19 | up   |

|         |         |         |     |     |     |      |      |
|---------|---------|---------|-----|-----|-----|------|------|
| 6368376 | 7254405 | 1508641 | --- | --- | --- | 1,07 | up   |
| 6368382 | 7243130 | 1480858 | --- | --- | --- | 2,16 | down |
| 6368436 | 7033672 | 970368  | --- | --- | --- | 1,50 | down |
| 6368530 | 7213908 | 1407689 | --- | --- | --- | 1,06 | down |
| 6368538 | 7373906 | 1806369 | --- | --- | --- | 1,11 | down |
| 6368539 | 7214363 | 1408973 | --- | --- | --- | 1,10 | down |
| 6368562 | 7236358 | 1464246 | --- | --- | --- | 1,16 | down |
| 6368619 | 7240569 | 1475517 | --- | --- | --- | 1,43 | down |
| 6368828 | 7040260 | 986058  | --- | --- | --- | 1,00 | down |
| 6368963 | 7316644 | 1664039 | --- | --- | --- | 1,05 | down |
| 6368996 | 7376566 | 1812859 | --- | --- | --- | 1,13 | up   |
| 6369016 | 7166439 | 1290094 | --- | --- | --- | 1,16 | down |
| 6369309 | 7280743 | 1574482 | --- | --- | --- | 1,11 | up   |
| 6369340 | 7065265 | 1044570 | --- | --- | --- | 1,80 | down |
| 6369350 | 7340304 | 1720862 | --- | --- | --- | 1,71 | down |
| 6369455 | 7380019 | 1820827 | --- | --- | --- | 1,72 | up   |
| 6369563 | 7273881 | 1557315 | --- | --- | --- | 2,46 | down |
| 6369639 | 7329846 | 1694997 | --- | --- | --- | 1,03 | down |
| 6369720 | 7097525 | 1121048 | --- | --- | --- | 1,38 | down |
| 6369743 | 7340757 | 1721887 | --- | --- | --- | 1,06 | down |
| 6369789 | 7351951 | 1749853 | --- | --- | --- | 1,18 | down |
| 6369833 | 7339379 | 1718349 | --- | --- | --- | 1,10 | down |
| 6369972 | 7195903 | 1365331 | --- | --- | --- | 2,00 | up   |
| 6369987 | 7064732 | 1042908 | --- | --- | --- | 1,72 | down |
| 6370105 | 7189669 | 1348969 | --- | --- | --- | 1,03 | up   |
| 6370115 | 7161841 | 1279882 | --- | --- | --- | 1,22 | up   |
| 6370199 | 7277783 | 1567465 | --- | --- | --- | 1,71 | down |
| 6370201 | 7356115 | 1760125 | --- | --- | --- | 1,69 | up   |
| 6370314 | 7272110 | 1553046 | --- | --- | --- | 1,23 | down |
| 6370337 | 7025652 | 950346  | --- | --- | --- | 1,05 | down |
| 6370374 | 7245921 | 1487677 | --- | --- | --- | 1,24 | down |
| 6370392 | 7098810 | 1124657 | --- | --- | --- | 1,61 | down |
| 6370405 | 7290585 | 1598177 | --- | --- | --- | 1,12 | up   |
| 6370476 | 7330078 | 1695459 | --- | --- | --- | 1,21 | down |
| 6370505 | 7243603 | 1482284 | --- | --- | --- | 1,16 | up   |
| 6370698 | 7139085 | 1223660 | --- | --- | --- | 1,04 | down |
| 6370996 | 7097680 | 1121733 | --- | --- | --- | 1,09 | up   |
| 6371052 | 7034293 | 971909  | --- | --- | --- | 1,29 | up   |
| 6371088 | 7311218 | 1650360 | --- | --- | --- | 1,00 | down |
| 6371108 | 7337260 | 1712805 | --- | --- | --- | 1,44 | up   |
| 6371161 | 7360325 | 1770514 | --- | --- | --- | 1,28 | up   |
| 6371375 | 7363674 | 1778420 | --- | --- | --- | 1,23 | down |
| 6371403 | 7378996 | 1818602 | --- | --- | --- | 1,35 | down |
| 6371407 | 7196029 | 1365604 | --- | --- | --- | 1,59 | down |
| 6371554 | 7030224 | 961133  | --- | --- | --- | 1,03 | down |
| 6371621 | 7340838 | 1722089 | --- | --- | --- | 1,04 | down |
| 6371664 | 7243653 | 1482526 | --- | --- | --- | 1,30 | up   |
| 6371837 | 7244290 | 1484152 | --- | --- | --- | 1,24 | up   |
| 6371869 | 7374790 | 1808780 | --- | --- | --- | 1,38 | down |
| 6371986 | 7211389 | 1402119 | --- | --- | --- | 1,23 | up   |
| 6372276 | 7210387 | 1400037 | --- | --- | --- | 1,21 | up   |
| 6372288 | 7244602 | 1484780 | --- | --- | --- | 1,20 | down |
| 6372289 | 7117158 | 1170031 | --- | --- | --- | 1,47 | down |
| 6372428 | 7369938 | 1795531 | --- | --- | --- | 1,13 | down |
| 6372471 | 7328833 | 1692796 | --- | --- | --- | 1,79 | down |
| 6372494 | 7111361 | 1155606 | --- | --- | --- | 1,21 | up   |

|         |         |         |     |     |     |      |      |
|---------|---------|---------|-----|-----|-----|------|------|
| 6372514 | 7029770 | 960159  | --- | --- | --- | 1,09 | up   |
| 6372526 | 7364995 | 1781295 | --- | --- | --- | 1,08 | down |
| 6372602 | 7339379 | 1718345 | --- | --- | --- | 1,10 | up   |
| 6372674 | 7034532 | 972656  | --- | --- | --- | 1,40 | up   |
| 6372677 | 7186464 | 1341385 | --- | --- | --- | 1,67 | up   |
| 6372822 | 7258545 | 1518924 | --- | --- | --- | 1,59 | up   |
| 6372957 | 7211389 | 1402113 | --- | --- | --- | 1,14 | down |
| 6373043 | 7186305 | 1341002 | --- | --- | --- | 1,29 | down |
| 6373268 | 7041609 | 989564  | --- | --- | --- | 1,14 | down |
| 6373352 | 7115362 | 1165602 | --- | --- | --- | 2,30 | up   |
| 6373388 | 7247749 | 1491880 | --- | --- | --- | 1,11 | down |
| 6373469 | 7358859 | 1767001 | --- | --- | --- | 1,01 | up   |
| 6373484 | 7367959 | 1789074 | --- | --- | --- | 1,23 | up   |
| 6373489 | 7049399 | 1008378 | --- | --- | --- | 1,27 | down |
| 6373614 | 7138047 | 1221236 | --- | --- | --- | 1,31 | down |
| 6373620 | 7036412 | 976854  | --- | --- | --- | 1,10 | down |
| 6373637 | 7343122 | 1727737 | --- | --- | --- | 1,31 | down |
| 6373731 | 7286807 | 1588833 | --- | --- | --- | 1,15 | down |
| 6373777 | 7087492 | 1096689 | --- | --- | --- | 1,49 | up   |
| 6373793 | 7059375 | 1030074 | --- | --- | --- | 1,34 | up   |
| 6373813 | 7199476 | 1374557 | --- | --- | --- | 1,04 | down |
| 6373815 | 7293646 | 1605409 | --- | --- | --- | 1,04 | up   |
| 6373941 | 7056333 | 1023679 | --- | --- | --- | 1,09 | up   |
| 6374030 | 7345465 | 1733842 | --- | --- | --- | 1,08 | down |
| 6374063 | 7098366 | 1123624 | --- | --- | --- | 1,26 | down |
| 6374074 | 7322020 | 1676645 | --- | --- | --- | 1,15 | up   |
| 6374092 | 7349946 | 1744951 | --- | --- | --- | 1,09 | up   |
| 6374199 | 7237711 | 1467431 | --- | --- | --- | 1,33 | down |
| 6374237 | 7200545 | 1376917 | --- | --- | --- | 1,24 | up   |
| 6374285 | 7351951 | 1749838 | --- | --- | --- | 1,27 | up   |
| 6374322 | 7117158 | 1170031 | --- | --- | --- | 1,50 | down |
| 6374385 | 7140113 | 1226048 | --- | --- | --- | 1,45 | down |
| 6374482 | 7186440 | 1341252 | --- | --- | --- | 1,33 | down |
| 6374674 | 7299204 | 1619545 | --- | --- | --- | 1,19 | up   |
| 6374684 | 7065655 | 1045263 | --- | --- | --- | 1,02 | up   |
| 6374769 | 7200545 | 1376902 | --- | --- | --- | 1,29 | up   |
| 6374773 | 7231203 | 1450435 | --- | --- | --- | 1,14 | down |
| 6374793 | 7244290 | 1484165 | --- | --- | --- | 1,10 | up   |
| 6374831 | 7243647 | 1482428 | --- | --- | --- | 1,08 | down |
| 6374916 | 7368613 | 1791620 | --- | --- | --- | 1,13 | up   |
| 6374960 | 7233440 | 1456903 | --- | --- | --- | 1,06 | up   |
| 6374972 | 7321029 | 1674819 | --- | --- | --- | 1,58 | up   |
| 6374974 | 7056333 | 1023674 | --- | --- | --- | 1,39 | down |
| 6374981 | 7038530 | 981868  | --- | --- | --- | 1,10 | down |
| 6375034 | 7276762 | 1564495 | --- | --- | --- | 1,26 | up   |
| 6375064 | 7220278 | 1423736 | --- | --- | --- | 1,25 | up   |
| 6375074 | 7281507 | 1576657 | --- | --- | --- | 1,05 | up   |
| 6375166 | 7098867 | 1124951 | --- | --- | --- | 1,38 | up   |
| 6375233 | 7200129 | 1375999 | --- | --- | --- | 1,38 | down |
| 6375288 | 7131550 | 1205552 | --- | --- | --- | 1,30 | up   |
| 6375378 | 7295410 | 1609733 | --- | --- | --- | 1,24 | down |
| 6375443 | 7067670 | 1050374 | --- | --- | --- | 1,48 | down |
| 6375539 | 7162144 | 1280491 | --- | --- | --- | 2,28 | down |
| 6375572 | 7360486 | 1770935 | --- | --- | --- | 1,12 | up   |
| 6375666 | 7201217 | 1378776 | --- | --- | --- | 1,16 | up   |
| 6375690 | 7312338 | 1652780 | --- | --- | --- | 1,31 | down |

|         |         |         |     |     |     |      |      |
|---------|---------|---------|-----|-----|-----|------|------|
| 6375728 | 7034293 | 971972  | --- | --- | --- | 1,12 | up   |
| 6375774 | 7129578 | 1200051 | --- | --- | --- | 1,09 | up   |
| 6375787 | 7086966 | 1095281 | --- | --- | --- | 1,11 | down |
| 6376094 | 7266706 | 1538746 | --- | --- | --- | 1,24 | down |
| 6376097 | 7070616 | 1057779 | --- | --- | --- | 1,38 | down |
| 6376119 | 7174149 | 1310487 | --- | --- | --- | 1,01 | down |
| 6376128 | 7032083 | 965682  | --- | --- | --- | 1,27 | up   |
| 6376129 | 7191594 | 1354169 | --- | --- | --- | 1,45 | up   |
| 6376168 | 7338807 | 1716815 | --- | --- | --- | 1,01 | up   |
| 6376197 | 7280743 | 1574477 | --- | --- | --- | 1,43 | up   |
| 6376260 | 7068259 | 1051601 | --- | --- | --- | 1,02 | down |
| 6376350 | 7280743 | 1574474 | --- | --- | --- | 1,09 | down |
| 6376375 | 7280743 | 1574561 | --- | --- | --- | 2,08 | down |
| 6376404 | 7350489 | 1746112 | --- | --- | --- | 1,32 | down |
| 6376421 | 7384179 | 1829791 | --- | --- | --- | 1,67 | up   |
| 6376434 | 7052385 | 1014772 | --- | --- | --- | 1,02 | down |
| 6376468 | 7075424 | 1069294 | --- | --- | --- | 1,09 | down |
| 6376503 | 7280743 | 1574557 | --- | --- | --- | 1,00 | down |
| 6376508 | 7193056 | 1358280 | --- | --- | --- | 1,70 | up   |
| 6376660 | 7274780 | 1559198 | --- | --- | --- | 1,08 | down |
| 6376664 | 7274780 | 1559224 | --- | --- | --- | 1,10 | down |
| 6376670 | 7228530 | 1443836 | --- | --- | --- | 1,41 | up   |
| 6376676 | 7088625 | 1099873 | --- | --- | --- | 1,37 | up   |
| 6376703 | 7065265 | 1044573 | --- | --- | --- | 1,33 | down |
| 6376741 | 7241163 | 1476819 | --- | --- | --- | 1,58 | down |
| 6376757 | 7087965 | 1098027 | --- | --- | --- | 1,65 | up   |
| 6376826 | 7271128 | 1550333 | --- | --- | --- | 1,08 | up   |
| 6376836 | 7338807 | 1716806 | --- | --- | --- | 1,24 | up   |
| 6376862 | 7033504 | 969858  | --- | --- | --- | 1,00 | up   |
| 6376946 | 7117832 | 1171754 | --- | --- | --- | 1,01 | down |
| 6376975 | 7321414 | 1675635 | --- | --- | --- | 1,05 | down |
| 6377102 | 7236395 | 1464340 | --- | --- | --- | 1,46 | up   |
| 6377116 | 7180721 | 1326700 | --- | --- | --- | 1,03 | down |
| 6377195 | 7088164 | 1098492 | --- | --- | --- | 1,49 | up   |
| 6377261 | 7072225 | 1061401 | --- | --- | --- | 1,28 | down |
| 6377278 | 7374842 | 1808993 | --- | --- | --- | 1,07 | up   |
| 6377472 | 7150631 | 1252175 | --- | --- | --- | 1,80 | up   |
| 6377720 | 7292657 | 1602835 | --- | --- | --- | 1,28 | down |
| 6377737 | 7132125 | 1206597 | --- | --- | --- | 1,19 | down |
| 6377743 | 7373678 | 1805856 | --- | --- | --- | 1,20 | up   |
| 6377818 | 7119179 | 1175003 | --- | --- | --- | 1,24 | down |
| 6377852 | 7080106 | 1079738 | --- | --- | --- | 1,34 | down |
| 6377866 | 7036870 | 977871  | --- | --- | --- | 1,48 | down |
| 6377908 | 7351951 | 1749837 | --- | --- | --- | 1,26 | up   |
| 6377919 | 7377513 | 1815296 | --- | --- | --- | 1,05 | up   |
| 6377980 | 7361420 | 1773069 | --- | --- | --- | 1,04 | down |
| 6378112 | 7160402 | 1276142 | --- | --- | --- | 2,01 | down |
| 6378137 | 7198210 | 1370996 | --- | --- | --- | 1,20 | up   |
| 6378295 | 7341546 | 1723951 | --- | --- | --- | 1,17 | up   |
| 6378329 | 7251608 | 1501454 | --- | --- | --- | 1,10 | down |
| 6378430 | 7332970 | 1702533 | --- | --- | --- | 1,06 | down |
| 6378493 | 7226241 | 1437812 | --- | --- | --- | 1,01 | down |
| 6378617 | 7245921 | 1487685 | --- | --- | --- | 1,01 | down |
| 6378680 | 7343122 | 1727748 | --- | --- | --- | 1,62 | down |
| 6378699 | 7323545 | 1679976 | --- | --- | --- | 1,00 | down |
| 6378712 | 7119930 | 1177211 | --- | --- | --- | 1,64 | up   |

|         |         |         |     |     |     |      |      |
|---------|---------|---------|-----|-----|-----|------|------|
| 6378741 | 7075533 | 1069572 | --- | --- | --- | 1,39 | up   |
| 6378748 | 7168914 | 1297020 | --- | --- | --- | 1,11 | up   |
| 6378889 | 7178060 | 1320172 | --- | --- | --- | 1,32 | down |
| 6378999 | 7122486 | 1183411 | --- | --- | --- | 1,58 | down |
| 6379068 | 7378997 | 1818667 | --- | --- | --- | 1,16 | down |
| 6379126 | 7364346 | 1779997 | --- | --- | --- | 1,86 | up   |
| 6379133 | 7346066 | 1735313 | --- | --- | --- | 1,27 | up   |
| 6379146 | 7248790 | 1494522 | --- | --- | --- | 1,15 | down |
| 6379155 | 7240206 | 1474362 | --- | --- | --- | 1,16 | down |
| 6379213 | 7025652 | 950323  | --- | --- | --- | 1,00 | up   |
| 6379258 | 7111573 | 1156030 | --- | --- | --- | 1,04 | up   |
| 6379309 | 7027797 | 956283  | --- | --- | --- | 2,60 | up   |
| 6379409 | 7058713 | 1028667 | --- | --- | --- | 1,52 | down |
| 6379525 | 7301895 | 1626718 | --- | --- | --- | 1,11 | up   |
| 6379532 | 7199476 | 1374532 | --- | --- | --- | 1,20 | down |
| 6379551 | 7186464 | 1341387 | --- | --- | --- | 2,09 | up   |
| 6379559 | 7097525 | 1121055 | --- | --- | --- | 1,23 | down |
| 6379724 | 7211363 | 1402054 | --- | --- | --- | 1,95 | up   |
| 6379983 | 7337260 | 1712790 | --- | --- | --- | 1,11 | up   |
| 6380054 | 7376206 | 1811979 | --- | --- | --- | 2,26 | up   |
| 6380069 | 7243130 | 1480882 | --- | --- | --- | 1,47 | down |
| 6380145 | 7068259 | 1051645 | --- | --- | --- | 1,27 | down |
| 6380213 | 7229886 | 1447146 | --- | --- | --- | 1,12 | up   |
| 6380216 | 7362184 | 1774846 | --- | --- | --- | 1,36 | up   |
| 6380244 | 7037235 | 978583  | --- | --- | --- | 1,21 | down |
| 6380375 | 7378997 | 1818669 | --- | --- | --- | 1,15 | down |
| 6380393 | 7297589 | 1615612 | --- | --- | --- | 1,04 | down |
| 6380450 | 7237719 | 1467533 | --- | --- | --- | 1,12 | up   |
| 6380468 | 7086975 | 1095324 | --- | --- | --- | 1,10 | down |
| 6380512 | 7031618 | 964187  | --- | --- | --- | 1,13 | up   |
| 6380608 | 7069724 | 1055333 | --- | --- | --- | 1,13 | down |
| 6380613 | 7319065 | 1669979 | --- | --- | --- | 1,28 | down |
| 6380871 | 7198210 | 1370976 | --- | --- | --- | 1,09 | down |
| 6381069 | 7060851 | 1033414 | --- | --- | --- | 1,02 | down |
| 6381106 | 7339732 | 1719239 | --- | --- | --- | 1,04 | up   |
| 6381137 | 7112225 | 1157606 | --- | --- | --- | 1,06 | up   |
| 6381205 | 7258323 | 1518480 | --- | --- | --- | 3,58 | down |
| 6381296 | 7112671 | 1158976 | --- | --- | --- | 2,49 | up   |
| 6381314 | 7217650 | 1417184 | --- | --- | --- | 1,88 | down |
| 6381341 | 7307721 | 1642011 | --- | --- | --- | 1,37 | up   |
| 6381377 | 7088625 | 1099867 | --- | --- | --- | 1,99 | down |
| 6381608 | 7214363 | 1408973 | --- | --- | --- | 1,33 | up   |
| 6381722 | 7337492 | 1713402 | --- | --- | --- | 1,29 | up   |
| 6381751 | 7050710 | 1011174 | --- | --- | --- | 1,01 | down |
| 6381773 | 7065655 | 1045260 | --- | --- | --- | 1,14 | up   |
| 6381832 | 7320337 | 1673323 | --- | --- | --- | 1,18 | up   |
| 6381909 | 7373678 | 1805882 | --- | --- | --- | 1,17 | up   |
| 6381970 | 7054958 | 1020579 | --- | --- | --- | 1,58 | down |
| 6381981 | 7332322 | 1701229 | --- | --- | --- | 1,17 | up   |
| 6382025 | 7213908 | 1407758 | --- | --- | --- | 1,10 | down |
| 6382034 | 7336931 | 1711871 | --- | --- | --- | 1,07 | up   |
| 6382111 | 7099030 | 1125334 | --- | --- | --- | 1,25 | down |
| 6382117 | 7162144 | 1280505 | --- | --- | --- | 1,37 | down |
| 6382222 | 7237132 | 1466106 | --- | --- | --- | 1,25 | down |
| 6382253 | 7198210 | 1371000 | --- | --- | --- | 1,79 | up   |
| 6382293 | 7068853 | 1053125 | --- | --- | --- | 1,25 | down |

|         |         |         |     |     |     |      |      |
|---------|---------|---------|-----|-----|-----|------|------|
| 6382306 | 7217747 | 1417511 | --- | --- | --- | 1,34 | down |
| 6382423 | 7181016 | 1327786 | --- | --- | --- | 1,39 | up   |
| 6382429 | 7055781 | 1022263 | --- | --- | --- | 1,10 | up   |
| 6382459 | 7371643 | 1800656 | --- | --- | --- | 2,46 | up   |
| 6382464 | 7334331 | 1705688 | --- | --- | --- | 1,37 | down |
| 6382658 | 7362184 | 1774813 | --- | --- | --- | 1,05 | down |
| 6382712 | 7359551 | 1768623 | --- | --- | --- | 1,03 | down |
| 6383114 | 7297589 | 1615613 | --- | --- | --- | 1,33 | down |
| 6383117 | 7267802 | 1541841 | --- | --- | --- | 1,02 | up   |
| 6383235 | 7384365 | 1830269 | --- | --- | --- | 1,01 | down |
| 6383237 | 7064134 | 1041445 | --- | --- | --- | 1,08 | down |
| 6383442 | 7371253 | 1799562 | --- | --- | --- | 1,05 | up   |
| 6383524 | 7253088 | 1505124 | --- | --- | --- | 1,18 | up   |
| 6383560 | 7132024 | 1206343 | --- | --- | --- | 1,32 | down |
| 6383584 | 7118356 | 1173173 | --- | --- | --- | 1,23 | down |
| 6383775 | 7330396 | 1696340 | --- | --- | --- | 2,09 | down |
| 6383822 | 7068259 | 1051599 | --- | --- | --- | 1,45 | up   |
| 6383829 | 7213945 | 1407837 | --- | --- | --- | 2,09 | up   |
| 6383832 | 7068259 | 1051662 | --- | --- | --- | 1,56 | up   |
| 6383964 | 7086522 | 1093950 | --- | --- | --- | 1,61 | up   |
| 6384102 | 7274892 | 1559562 | --- | --- | --- | 1,59 | down |
| 6384197 | 7071264 | 1059296 | --- | --- | --- | 1,20 | up   |
| 6384279 | 7277783 | 1567472 | --- | --- | --- | 1,03 | down |
| 6384322 | 7174149 | 1310525 | --- | --- | --- | 1,01 | down |
| 6384360 | 7033337 | 969498  | --- | --- | --- | 1,12 | up   |
| 6384392 | 7373906 | 1806361 | --- | --- | --- | 1,02 | up   |
| 6384433 | 7188138 | 1345033 | --- | --- | --- | 1,35 | up   |
| 6384439 | 7103782 | 1136947 | --- | --- | --- | 2,25 | up   |
| 6384488 | 7257963 | 1517683 | --- | --- | --- | 1,04 | down |
| 6384552 | 7281507 | 1576716 | --- | --- | --- | 2,22 | up   |
| 6384589 | 7282343 | 1578669 | --- | --- | --- | 1,27 | down |
| 6384599 | 7229886 | 1447168 | --- | --- | --- | 1,12 | up   |
| 6384683 | 7199476 | 1374554 | --- | --- | --- | 1,24 | down |
| 6384687 | 7339379 | 1718333 | --- | --- | --- | 1,16 | down |
| 6384752 | 7064224 | 1041771 | --- | --- | --- | 1,01 | up   |
| 6384815 | 7369400 | 1793984 | --- | --- | --- | 1,24 | down |
| 6384884 | 7240569 | 1475371 | --- | --- | --- | 1,03 | up   |
| 6384906 | 7330238 | 1695946 | --- | --- | --- | 1,04 | up   |
| 6384959 | 7277783 | 1567451 | --- | --- | --- | 1,87 | up   |
| 6384976 | 7235521 | 1462144 | --- | --- | --- | 1,56 | up   |
| 6385079 | 7197820 | 1370103 | --- | --- | --- | 1,97 | up   |
| 6385127 | 7287222 | 1589741 | --- | --- | --- | 1,16 | down |
| 6385175 | 7321029 | 1674809 | --- | --- | --- | 1,15 | up   |
| 6385189 | 7359551 | 1768642 | --- | --- | --- | 1,15 | down |
| 6385331 | 7033504 | 969858  | --- | --- | --- | 1,35 | down |
| 6385350 | 7065655 | 1045236 | --- | --- | --- | 1,23 | up   |
| 6385393 | 7356115 | 1760132 | --- | --- | --- | 1,16 | up   |
| 6385423 | 7363674 | 1778457 | --- | --- | --- | 2,43 | down |
| 6385523 | 7373906 | 1806356 | --- | --- | --- | 1,28 | down |
| 6385624 | 7376206 | 1811979 | --- | --- | --- | 1,21 | up   |
| 6385791 | 7248790 | 1494506 | --- | --- | --- | 1,85 | up   |
| 6385986 | 7156170 | 1266237 | --- | --- | --- | 1,20 | down |
| 6386045 | 7289382 | 1595200 | --- | --- | --- | 1,07 | down |
| 6386092 | 7040260 | 986077  | --- | --- | --- | 1,18 | down |
| 6386118 | 7069253 | 1054165 | --- | --- | --- | 1,28 | up   |
| 6386181 | 7188681 | 1346290 | --- | --- | --- | 1,24 | down |

|         |         |         |     |     |     |      |      |
|---------|---------|---------|-----|-----|-----|------|------|
| 6386439 | 7367946 | 1788948 | --- | --- | --- | 1,32 | down |
| 6386440 | 7142081 | 1230967 | --- | --- | --- | 1,17 | down |
| 6386575 | 7280743 | 1574543 | --- | --- | --- | 1,44 | up   |
| 6386617 | 7244602 | 1484761 | --- | --- | --- | 1,01 | down |
| 6386658 | 7370843 | 1798378 | --- | --- | --- | 1,02 | up   |
| 6386747 | 7106414 | 1143197 | --- | --- | --- | 1,02 | up   |
| 6386760 | 7139085 | 1223673 | --- | --- | --- | 1,08 | down |
| 6386851 | 7280743 | 1574501 | --- | --- | --- | 1,29 | down |
| 6386909 | 7086966 | 1095285 | --- | --- | --- | 1,13 | up   |
| 6387135 | 7156978 | 1268174 | --- | --- | --- | 1,30 | down |
| 6387180 | 7155116 | 1263426 | --- | --- | --- | 1,31 | down |
| 6387247 | 7243603 | 1482261 | --- | --- | --- | 1,74 | down |
| 6387303 | 7080731 | 1080972 | --- | --- | --- | 1,06 | down |
| 6387344 | 7288095 | 1592077 | --- | --- | --- | 1,59 | down |
| 6387532 | 7281140 | 1575714 | --- | --- | --- | 1,33 | up   |
| 6387557 | 7343122 | 1727733 | --- | --- | --- | 1,21 | up   |
| 6387740 | 7098867 | 1124949 | --- | --- | --- | 1,02 | up   |
| 6387801 | 7358048 | 1764806 | --- | --- | --- | 2,06 | down |
| 6387893 | 7214605 | 1409401 | --- | --- | --- | 1,16 | down |
| 6387979 | 7296131 | 1611504 | --- | --- | --- | 1,03 | up   |
| 6387987 | 7316644 | 1663986 | --- | --- | --- | 1,01 | up   |
| 6388062 | 7075424 | 1069292 | --- | --- | --- | 1,07 | down |
| 6388303 | 7248790 | 1494552 | --- | --- | --- | 1,05 | down |
| 6388304 | 7097525 | 1121059 | --- | --- | --- | 1,09 | up   |
| 6388349 | 7096886 | 1119414 | --- | --- | --- | 1,04 | up   |
| 6388392 | 7168858 | 1296825 | --- | --- | --- | 1,09 | down |
| 6388440 | 7198210 | 1370954 | --- | --- | --- | 1,38 | up   |
| 6388514 | 7032444 | 966750  | --- | --- | --- | 1,50 | up   |
| 6388555 | 7249388 | 1495887 | --- | --- | --- | 1,55 | up   |
| 6388681 | 7331434 | 1699197 | --- | --- | --- | 1,01 | up   |
| 6388711 | 7188138 | 1344999 | --- | --- | --- | 1,20 | up   |
| 6388737 | 7059970 | 1031458 | --- | --- | --- | 1,62 | down |
| 6388790 | 7072225 | 1061405 | --- | --- | --- | 1,31 | down |
| 6388813 | 7226241 | 1437811 | --- | --- | --- | 1,07 | up   |
| 6388848 | 7169573 | 1298391 | --- | --- | --- | 3,42 | down |
| 6388866 | 7258520 | 1518884 | --- | --- | --- | 1,10 | down |
| 6389012 | 7297589 | 1615667 | --- | --- | --- | 1,02 | up   |
| 6389050 | 7275927 | 1562353 | --- | --- | --- | 1,21 | up   |
| 6389148 | 7260613 | 1524274 | --- | --- | --- | 1,41 | up   |
| 6389205 | 7038669 | 982186  | --- | --- | --- | 1,01 | up   |
| 6389376 | 7243363 | 1481603 | --- | --- | --- | 1,10 | down |
| 6389392 | 7248790 | 1494553 | --- | --- | --- | 1,01 | down |
| 6389404 | 7052331 | 1014567 | --- | --- | --- | 1,00 | down |
| 6389529 | 7032444 | 966735  | --- | --- | --- | 1,16 | down |
| 6389564 | 7267802 | 1541812 | --- | --- | --- | 1,56 | up   |
| 6389592 | 7352046 | 1750027 | --- | --- | --- | 1,44 | up   |
| 6389634 | 7070836 | 1058348 | --- | --- | --- | 1,26 | up   |
| 6389655 | 7133612 | 1210270 | --- | --- | --- | 1,49 | down |
| 6389683 | 7337224 | 1712584 | --- | --- | --- | 1,20 | up   |
| 6389692 | 7279303 | 1571202 | --- | --- | --- | 1,04 | up   |
| 6389711 | 7287222 | 1589724 | --- | --- | --- | 1,34 | down |
| 6389791 | 7101258 | 1130557 | --- | --- | --- | 1,82 | down |
| 6389839 | 7237719 | 1467477 | --- | --- | --- | 1,35 | up   |
| 6389883 | 7323545 | 1679947 | --- | --- | --- | 1,26 | down |
| 6389991 | 7132263 | 1206895 | --- | --- | --- | 1,04 | up   |
| 6390001 | 7275718 | 1561759 | --- | --- | --- | 1,67 | up   |



|         |         |         |     |     |     |      |      |
|---------|---------|---------|-----|-----|-----|------|------|
| 6390025 | 7280743 | 1574496 | --- | --- | --- | 1,14 | up   |
| 6390050 | 7281507 | 1576700 | --- | --- | --- | 1,13 | up   |
| 6390086 | 7233359 | 1456508 | --- | --- | --- | 1,12 | up   |
| 6390100 | 7240569 | 1475326 | --- | --- | --- | 1,68 | down |
| 6390200 | 7299512 | 1620549 | --- | --- | --- | 1,27 | up   |
| 6390362 | 7071264 | 1059363 | --- | --- | --- | 1,20 | down |
| 6390412 | 7244288 | 1484093 | --- | --- | --- | 1,05 | down |
| 6390413 | 7025652 | 950351  | --- | --- | --- | 1,42 | up   |
| 6390418 | 7038669 | 982184  | --- | --- | --- | 1,05 | down |
| 6390434 | 7236492 | 1464540 | --- | --- | --- | 1,13 | down |
| 6390484 | 7330396 | 1696354 | --- | --- | --- | 1,55 | down |
| 6390799 | 7264797 | 1534438 | --- | --- | --- | 1,15 | down |
| 6390808 | 7229856 | 1447080 | --- | --- | --- | 1,07 | down |
| 6390825 | 7029770 | 960158  | --- | --- | --- | 1,26 | down |
| 6390828 | 7127540 | 1195272 | --- | --- | --- | 1,30 | down |
| 6390872 | 7236597 | 1464782 | --- | --- | --- | 1,33 | down |
| 6390942 | 7092549 | 1109155 | --- | --- | --- | 1,48 | down |
| 6391117 | 7098810 | 1124649 | --- | --- | --- | 1,13 | up   |
| 6391172 | 7076236 | 1071230 | --- | --- | --- | 2,95 | down |
| 6391276 | 7120169 | 1177814 | --- | --- | --- | 1,28 | up   |
| 6391354 | 7301022 | 1624252 | --- | --- | --- | 1,44 | down |
| 6391414 | 7087492 | 1096699 | --- | --- | --- | 1,10 | up   |
| 6391442 | 7359460 | 1768473 | --- | --- | --- | 1,54 | up   |
| 6391475 | 7201217 | 1378762 | --- | --- | --- | 2,88 | up   |
| 6391826 | 7168914 | 1297020 | --- | --- | --- | 2,16 | up   |
| 6391878 | 7072754 | 1062642 | --- | --- | --- | 1,16 | down |
| 6391906 | 7096859 | 1119331 | --- | --- | --- | 1,11 | up   |
| 6392146 | 7103811 | 1137050 | --- | --- | --- | 1,13 | up   |
| 6392202 | 7286807 | 1588834 | --- | --- | --- | 1,40 | down |
| 6392299 | 7119179 | 1174989 | --- | --- | --- | 1,13 | down |
| 6392311 | 7058713 | 1028668 | --- | --- | --- | 1,50 | down |
| 6392356 | 7156170 | 1266286 | --- | --- | --- | 1,11 | up   |
| 6392401 | 7072754 | 1062660 | --- | --- | --- | 1,02 | down |
| 6392468 | 7096898 | 1119519 | --- | --- | --- | 2,03 | up   |
| 6392502 | 7230611 | 1448824 | --- | --- | --- | 1,19 | up   |
| 6392562 | 7224182 | 1432758 | --- | --- | --- | 1,01 | down |
| 6392672 | 7258784 | 1519670 | --- | --- | --- | 2,12 | up   |
| 6392679 | 7030454 | 961551  | --- | --- | --- | 1,04 | up   |
| 6392832 | 7092549 | 1109188 | --- | --- | --- | 1,16 | up   |
| 6392884 | 7242490 | 1479431 | --- | --- | --- | 1,29 | up   |
| 6392898 | 7104977 | 1140170 | --- | --- | --- | 1,08 | down |
| 6392923 | 7330737 | 1697218 | --- | --- | --- | 1,74 | up   |
| 6393150 | 7190844 | 1352146 | --- | --- | --- | 1,29 | up   |
| 6393422 | 7253272 | 1505553 | --- | --- | --- | 1,00 | up   |
| 6393466 | 7247848 | 1492067 | --- | --- | --- | 5,69 | down |
| 6393513 | 7097525 | 1121052 | --- | --- | --- | 1,74 | down |
| 6393525 | 7312575 | 1653359 | --- | --- | --- | 1,03 | up   |
| 6393731 | 7064856 | 1043216 | --- | --- | --- | 1,27 | down |
| 6393794 | 7277783 | 1567452 | --- | --- | --- | 2,24 | up   |
| 6393962 | 7099030 | 1125329 | --- | --- | --- | 1,34 | down |
| 6394075 | 7274593 | 1558813 | --- | --- | --- | 1,07 | down |
| 6394099 | 7123357 | 1185601 | --- | --- | --- | 2,15 | up   |
| 6394203 | 7369031 | 1793013 | --- | --- | --- | 1,68 | down |
| 6394501 | 7243647 | 1482459 | --- | --- | --- | 1,02 | down |
| 6394505 | 7059702 | 1030774 | --- | --- | --- | 1,05 | down |
| 6394567 | 7274585 | 1558777 | --- | --- | --- | 1,04 | down |

|         |         |         |     |     |     |      |      |
|---------|---------|---------|-----|-----|-----|------|------|
| 6394614 | 7181961 | 1330348 | --- | --- | --- | 1,18 | down |
| 6394631 | 7115362 | 1165604 | --- | --- | --- | 1,04 | down |
| 6394705 | 7068259 | 1051639 | --- | --- | --- | 1,67 | down |
| 6394746 | 7142081 | 1230965 | --- | --- | --- | 1,61 | up   |
| 6394749 | 7112225 | 1157548 | --- | --- | --- | 1,22 | up   |
| 6394753 | 7380019 | 1820829 | --- | --- | --- | 1,09 | up   |
| 6394825 | 7068259 | 1051620 | --- | --- | --- | 1,12 | up   |
| 6394843 | 7217747 | 1417500 | --- | --- | --- | 1,31 | down |
| 6394856 | 7248790 | 1494560 | --- | --- | --- | 1,17 | down |
| 6394905 | 7225553 | 1435977 | --- | --- | --- | 1,20 | down |
| 6395016 | 7068073 | 1051166 | --- | --- | --- | 1,06 | down |
| 6395045 | 7236395 | 1464332 | --- | --- | --- | 1,09 | up   |
| 6395051 | 7280743 | 1574495 | --- | --- | --- | 1,00 | down |
| 6395086 | 7111573 | 1156020 | --- | --- | --- | 3,20 | down |
| 6395166 | 7113083 | 1159980 | --- | --- | --- | 1,03 | down |
| 6395169 | 7098451 | 1123808 | --- | --- | --- | 1,72 | down |
| 6395200 | 7319259 | 1670396 | --- | --- | --- | 1,06 | up   |
| 6395240 | 7088625 | 1099878 | --- | --- | --- | 1,02 | up   |
| 6395348 | 7301890 | 1626684 | --- | --- | --- | 1,16 | down |
| 6395412 | 7255120 | 1510371 | --- | --- | --- | 1,24 | up   |
| 6395467 | 7028624 | 958003  | --- | --- | --- | 1,12 | up   |
| 6395530 | 7186106 | 1340494 | --- | --- | --- | 2,46 | down |
| 6395595 | 7153589 | 1259071 | --- | --- | --- | 1,66 | down |
| 6395644 | 7112562 | 1158606 | --- | --- | --- | 1,03 | down |
| 6395680 | 7037806 | 980195  | --- | --- | --- | 1,45 | down |
| 6395756 | 7112570 | 1158679 | --- | --- | --- | 1,50 | up   |
| 6395813 | 7031774 | 964711  | --- | --- | --- | 2,08 | up   |
| 6395848 | 7237132 | 1466106 | --- | --- | --- | 1,00 | up   |
| 6395896 | 7174149 | 1310523 | --- | --- | --- | 1,10 | up   |
| 6396007 | 7348487 | 1741252 | --- | --- | --- | 1,24 | up   |
| 6396008 | 7093936 | 1112476 | --- | --- | --- | 1,09 | up   |
| 6396260 | 7263152 | 1530374 | --- | --- | --- | 1,09 | down |
| 6396271 | 7243363 | 1481628 | --- | --- | --- | 1,23 | up   |
| 6396305 | 7087282 | 1096169 | --- | --- | --- | 1,05 | up   |
| 6396403 | 7329135 | 1693489 | --- | --- | --- | 1,92 | down |
| 6396411 | 7056333 | 1023699 | --- | --- | --- | 1,10 | up   |
| 6396422 | 7261019 | 1525281 | --- | --- | --- | 1,75 | down |
| 6396491 | 7049118 | 1007772 | --- | --- | --- | 1,03 | down |
| 6396512 | 7059766 | 1030977 | --- | --- | --- | 2,19 | down |
| 6396547 | 7146093 | 1240987 | --- | --- | --- | 1,20 | up   |
| 6396580 | 7093806 | 1112151 | --- | --- | --- | 4,04 | down |
| 6396674 | 7247228 | 1490529 | --- | --- | --- | 1,84 | down |
| 6396722 | 7037764 | 980038  | --- | --- | --- | 1,10 | up   |
| 6396760 | 7282343 | 1578686 | --- | --- | --- | 2,14 | up   |
| 6396856 | 7330396 | 1696336 | --- | --- | --- | 1,02 | down |
| 6396920 | 7043452 | 993838  | --- | --- | --- | 1,28 | up   |
| 6396927 | 7067828 | 1050789 | --- | --- | --- | 1,00 | up   |
| 6396964 | 7239752 | 1473195 | --- | --- | --- | 1,20 | down |
| 6397047 | 7255755 | 1511913 | --- | --- | --- | 1,51 | up   |
| 6397062 | 7072765 | 1062743 | --- | --- | --- | 1,58 | down |
| 6397142 | 7344530 | 1731563 | --- | --- | --- | 1,16 | down |
| 6397425 | 7098126 | 1122981 | --- | --- | --- | 1,19 | up   |
| 6397503 | 7339379 | 1718360 | --- | --- | --- | 1,26 | up   |
| 6397545 | 7332970 | 1702551 | --- | --- | --- | 1,62 | down |
| 6397569 | 7333462 | 1703648 | --- | --- | --- | 1,42 | down |
| 6397575 | 7068942 | 1053385 | --- | --- | --- | 1,31 | down |

|         |         |         |     |     |     |      |      |
|---------|---------|---------|-----|-----|-----|------|------|
| 6397723 | 7190534 | 1351213 | --- | --- | --- | 1,00 | up   |
| 6397724 | 7244290 | 1484166 | --- | --- | --- | 1,03 | down |
| 6397728 | 7180732 | 1326729 | --- | --- | --- | 1,07 | up   |
| 6397790 | 7280743 | 1574483 | --- | --- | --- | 1,36 | down |
| 6397797 | 7301895 | 1626708 | --- | --- | --- | 1,54 | down |
| 6397801 | 7384509 | 1830749 | --- | --- | --- | 1,27 | down |
| 6397819 | 7070836 | 1058334 | --- | --- | --- | 1,09 | up   |
| 6398017 | 7150497 | 1251792 | --- | --- | --- | 1,04 | up   |
| 6398021 | 7243130 | 1480944 | --- | --- | --- | 1,57 | down |
| 6398064 | 7352044 | 1750004 | --- | --- | --- | 1,11 | down |
| 6398067 | 7065655 | 1045264 | --- | --- | --- | 1,70 | up   |
| 6398081 | 7237719 | 1467489 | --- | --- | --- | 1,34 | up   |
| 6398236 | 7271128 | 1550315 | --- | --- | --- | 1,48 | down |
| 6398268 | 7364346 | 1779989 | --- | --- | --- | 2,83 | up   |
| 6398408 | 7079905 | 1079345 | --- | --- | --- | 1,18 | down |
| 6398433 | 7185483 | 1338926 | --- | --- | --- | 1,30 | down |
| 6398458 | 7069253 | 1054163 | --- | --- | --- | 1,14 | up   |
| 6398762 | 7196029 | 1365632 | --- | --- | --- | 1,47 | down |
| 6398813 | 7060851 | 1033437 | --- | --- | --- | 1,18 | down |
| 6398884 | 7064468 | 1042376 | --- | --- | --- | 1,14 | up   |
| 6399147 | 7236395 | 1464318 | --- | --- | --- | 1,08 | down |
| 6399166 | 7319937 | 1672256 | --- | --- | --- | 1,31 | up   |
| 6399281 | 7316644 | 1664018 | --- | --- | --- | 1,06 | up   |
| 6399362 | 7041609 | 989547  | --- | --- | --- | 1,21 | down |
| 6399431 | 7234195 | 1458981 | --- | --- | --- | 1,25 | up   |
| 6399556 | 7083160 | 1086554 | --- | --- | --- | 1,02 | up   |
| 6399583 | 7339387 | 1718380 | --- | --- | --- | 1,14 | down |
| 6399641 | 7181105 | 1327967 | --- | --- | --- | 1,28 | up   |
| 6399686 | 7037764 | 979989  | --- | --- | --- | 1,23 | down |
| 6399690 | 7330737 | 1697220 | --- | --- | --- | 1,06 | down |
| 6399707 | 7245874 | 1487596 | --- | --- | --- | 2,02 | down |
| 6399835 | 7211389 | 1402112 | --- | --- | --- | 1,04 | down |
| 6399869 | 7360486 | 1770976 | --- | --- | --- | 1,30 | down |
| 6399997 | 7127797 | 1195856 | --- | --- | --- | 1,06 | down |
| 6400014 | 7243647 | 1482460 | --- | --- | --- | 1,04 | up   |
| 6400024 | 7350237 | 1745497 | --- | --- | --- | 1,10 | up   |
| 6400049 | 7210600 | 1400515 | --- | --- | --- | 1,58 | up   |
| 6400143 | 7067670 | 1050322 | --- | --- | --- | 1,14 | up   |
| 6400194 | 7224035 | 1432401 | --- | --- | --- | 1,95 | down |
| 6400208 | 7321414 | 1675633 | --- | --- | --- | 1,15 | down |
| 6400295 | 7271213 | 1550633 | --- | --- | --- | 1,03 | up   |
| 6400419 | 7196966 | 1367633 | --- | --- | --- | 2,19 | down |
| 6400590 | 7197056 | 1367845 | --- | --- | --- | 1,34 | up   |
| 6400606 | 7168858 | 1296827 | --- | --- | --- | 1,16 | up   |
| 6400611 | 7127540 | 1195288 | --- | --- | --- | 1,12 | up   |
| 6400639 | 7351951 | 1749821 | --- | --- | --- | 1,26 | up   |
| 6400646 | 7064224 | 1041799 | --- | --- | --- | 1,44 | up   |
| 6400773 | 7232340 | 1453522 | --- | --- | --- | 1,14 | down |
| 6400792 | 7297523 | 1615448 | --- | --- | --- | 1,23 | up   |
| 6400839 | 7379957 | 1820631 | --- | --- | --- | 2,61 | down |
| 6400987 | 7218728 | 1419921 | --- | --- | --- | 1,13 | up   |
| 6401006 | 7064732 | 1042929 | --- | --- | --- | 1,06 | down |
| 6401034 | 7368004 | 1789332 | --- | --- | --- | 1,19 | up   |
| 6401040 | 7027759 | 956132  | --- | --- | --- | 1,56 | up   |
| 6401062 | 7248790 | 1494535 | --- | --- | --- | 1,51 | up   |
| 6401068 | 7210600 | 1400523 | --- | --- | --- | 1,15 | down |

|         |         |         |     |     |     |      |      |
|---------|---------|---------|-----|-----|-----|------|------|
| 6401090 | 7213945 | 1407828 | --- | --- | --- | 1,96 | up   |
| 6401224 | 7284501 | 1583850 | --- | --- | --- | 1,21 | down |
| 6401240 | 7191594 | 1354228 | --- | --- | --- | 1,16 | up   |
| 6401287 | 7040260 | 986057  | --- | --- | --- | 1,17 | up   |
| 6401369 | 7060851 | 1033401 | --- | --- | --- | 1,09 | down |
| 6401543 | 7373633 | 1805699 | --- | --- | --- | 1,16 | down |
| 6401544 | 7120690 | 1179048 | --- | --- | --- | 1,68 | up   |
| 6401567 | 7053874 | 1018325 | --- | --- | --- | 1,07 | up   |
| 6401570 | 7280743 | 1574490 | --- | --- | --- | 1,19 | down |
| 6401716 | 7067828 | 1050797 | --- | --- | --- | 1,09 | down |
| 6401754 | 7232340 | 1453530 | --- | --- | --- | 1,04 | up   |
| 6401776 | 7072608 | 1062297 | --- | --- | --- | 1,01 | down |
| 6401785 | 7278898 | 1570296 | --- | --- | --- | 2,59 | down |
| 6401800 | 7053874 | 1018332 | --- | --- | --- | 1,09 | down |
| 6401802 | 7196803 | 1367332 | --- | --- | --- | 1,36 | up   |
| 6401827 | 7181016 | 1327789 | --- | --- | --- | 1,49 | down |
| 6401856 | 7337260 | 1712802 | --- | --- | --- | 1,05 | down |
| 6402241 | 7067670 | 1050310 | --- | --- | --- | 1,44 | up   |
| 6402317 | 7331413 | 1699129 | --- | --- | --- | 1,26 | up   |
| 6402336 | 7096859 | 1119327 | --- | --- | --- | 1,15 | up   |
| 6402378 | 7132024 | 1206337 | --- | --- | --- | 1,04 | down |
| 6402382 | 7221420 | 1426262 | --- | --- | --- | 1,10 | up   |
| 6402448 | 7321414 | 1675628 | --- | --- | --- | 1,01 | down |
| 6402515 | 7236991 | 1465784 | --- | --- | --- | 1,74 | down |
| 6402699 | 7243130 | 1480939 | --- | --- | --- | 1,01 | up   |
| 6402788 | 7333333 | 1703396 | --- | --- | --- | 1,09 | down |
| 6402948 | 7196233 | 1366104 | --- | --- | --- | 1,02 | up   |
| 6402950 | 7345465 | 1733865 | --- | --- | --- | 1,24 | up   |
| 6403019 | 7214363 | 1408972 | --- | --- | --- | 1,46 | down |
| 6403245 | 7197056 | 1367843 | --- | --- | --- | 1,12 | up   |
| 6403306 | 7318596 | 1668936 | --- | --- | --- | 1,10 | down |
| 6403464 | 7320337 | 1673320 | --- | --- | --- | 1,01 | down |
| 6403621 | 7373678 | 1805854 | --- | --- | --- | 1,39 | up   |
| 6403652 | 7137646 | 1220430 | --- | --- | --- | 1,26 | down |
| 6403731 | 7049399 | 1008428 | --- | --- | --- | 1,46 | up   |
| 6403815 | 7193056 | 1358250 | --- | --- | --- | 1,38 | up   |
| 6403870 | 7248790 | 1494547 | --- | --- | --- | 1,12 | down |
| 6403930 | 7253408 | 1505953 | --- | --- | --- | 1,18 | down |
| 6404004 | 7069830 | 1055589 | --- | --- | --- | 1,71 | down |
| 6404013 | 7134773 | 1212969 | --- | --- | --- | 1,03 | down |
| 6404022 | 7196029 | 1365621 | --- | --- | --- | 1,44 | up   |
| 6404163 | 7218728 | 1419925 | --- | --- | --- | 1,10 | down |
| 6404174 | 7280743 | 1574542 | --- | --- | --- | 1,24 | down |
| 6404242 | 7337902 | 1714543 | --- | --- | --- | 1,17 | up   |
| 6404251 | 7373732 | 1805974 | --- | --- | --- | 1,58 | down |
| 6404264 | 7313905 | 1656853 | --- | --- | --- | 2,17 | down |
| 6404324 | 7038153 | 981148  | --- | --- | --- | 1,45 | up   |
| 6404332 | 7333333 | 1703395 | --- | --- | --- | 1,46 | down |
| 6404364 | 7144088 | 1236189 | --- | --- | --- | 1,21 | up   |
| 6404399 | 7233440 | 1456827 | --- | --- | --- | 1,08 | down |
| 6404524 | 7243653 | 1482539 | --- | --- | --- | 1,17 | up   |
| 6404554 | 7217650 | 1417210 | --- | --- | --- | 1,01 | up   |
| 6404573 | 7376566 | 1812851 | --- | --- | --- | 1,52 | up   |
| 6404724 | 7111066 | 1154950 | --- | --- | --- | 1,83 | down |
| 6404752 | 7340304 | 1720867 | --- | --- | --- | 2,26 | down |
| 6404774 | 7286807 | 1588782 | --- | --- | --- | 1,39 | down |

|         |         |         |     |     |     |      |      |
|---------|---------|---------|-----|-----|-----|------|------|
| 6404775 | 7333462 | 1703645 | --- | --- | --- | 1,02 | down |
| 6404788 | 7102510 | 1133857 | --- | --- | --- | 1,37 | up   |
| 6404799 | 7052385 | 1014789 | --- | --- | --- | 1,09 | down |
| 6404818 | 7216132 | 1413399 | --- | --- | --- | 1,17 | up   |
| 6404937 | 7243363 | 1481594 | --- | --- | --- | 1,18 | down |
| 6404944 | 7280743 | 1574544 | --- | --- | --- | 1,18 | up   |
| 6405009 | 7213908 | 1407661 | --- | --- | --- | 1,17 | down |
| 6405028 | 7363674 | 1778408 | --- | --- | --- | 1,01 | up   |
| 6405066 | 7161300 | 1278550 | --- | --- | --- | 1,24 | up   |
| 6405069 | 7292154 | 1601631 | --- | --- | --- | 1,08 | down |
| 6405073 | 7076160 | 1070912 | --- | --- | --- | 1,32 | down |
| 6405288 | 7183927 | 1335503 | --- | --- | --- | 1,16 | up   |
| 6405368 | 7131360 | 1204976 | --- | --- | --- | 1,03 | up   |
| 6405432 | 7056333 | 1023678 | --- | --- | --- | 1,24 | down |
| 6405464 | 7233359 | 1456510 | --- | --- | --- | 1,16 | down |
| 6405537 | 7211363 | 1402038 | --- | --- | --- | 1,95 | down |
| 6405570 | 7039223 | 983558  | --- | --- | --- | 1,02 | up   |
| 6405584 | 7293757 | 1605688 | --- | --- | --- | 1,05 | down |
| 6405630 | 7189669 | 1348967 | --- | --- | --- | 1,37 | down |
| 6405648 | 7084999 | 1090707 | --- | --- | --- | 1,40 | down |
| 6405754 | 7380497 | 1821833 | --- | --- | --- | 1,13 | up   |
| 6405802 | 7244378 | 1484408 | --- | --- | --- | 2,16 | down |
| 6405833 | 7345882 | 1734809 | --- | --- | --- | 1,02 | down |
| 6405847 | 7365183 | 1781903 | --- | --- | --- | 1,01 | down |
| 6405869 | 7034486 | 972530  | --- | --- | --- | 1,07 | down |
| 6405892 | 7225553 | 1435978 | --- | --- | --- | 1,34 | down |
| 6405897 | 7092549 | 1109149 | --- | --- | --- | 1,10 | up   |
| 6405901 | 7213945 | 1407853 | --- | --- | --- | 1,41 | down |
| 6405918 | 7180732 | 1326741 | --- | --- | --- | 1,10 | up   |
| 6406025 | 7308679 | 1644240 | --- | --- | --- | 1,04 | up   |
| 6406092 | 7240569 | 1475445 | --- | --- | --- | 1,05 | down |
| 6406310 | 7240569 | 1475470 | --- | --- | --- | 1,81 | down |
| 6406330 | 7355220 | 1758094 | --- | --- | --- | 1,23 | up   |
| 6406357 | 7155286 | 1263908 | --- | --- | --- | 1,84 | down |
| 6406362 | 7096924 | 1119610 | --- | --- | --- | 1,15 | up   |
| 6406626 | 7349882 | 1744782 | --- | --- | --- | 1,06 | down |
| 6406678 | 7373906 | 1806367 | --- | --- | --- | 1,03 | down |
| 6406735 | 7045955 | 1000745 | --- | --- | --- | 2,37 | down |
| 6406820 | 7052813 | 1015937 | --- | --- | --- | 1,21 | down |
| 6406825 | 7273251 | 1555946 | --- | --- | --- | 1,07 | down |
| 6406835 | 7287337 | 1589969 | --- | --- | --- | 1,55 | down |
| 6406839 | 7340838 | 1722088 | --- | --- | --- | 1,23 | down |
| 6406910 | 7093936 | 1112461 | --- | --- | --- | 1,14 | up   |
| 6406922 | 7378878 | 1818322 | --- | --- | --- | 1,46 | down |
| 6406964 | 7263152 | 1530352 | --- | --- | --- | 1,09 | down |
| 6407028 | 7146982 | 1243283 | --- | --- | --- | 1,07 | up   |
| 6407088 | 7103337 | 1135965 | --- | --- | --- | 1,12 | up   |
| 6407345 | 7112225 | 1157553 | --- | --- | --- | 1,04 | down |
| 6407375 | 7058713 | 1028664 | --- | --- | --- | 1,18 | down |
| 6407382 | 7376820 | 1813419 | --- | --- | --- | 1,14 | up   |
| 6407390 | 7112570 | 1158653 | --- | --- | --- | 1,17 | down |
| 6407459 | 7376206 | 1811980 | --- | --- | --- | 1,23 | down |
| 6407526 | 7057277 | 1025526 | --- | --- | --- | 1,15 | down |
| 6407539 | 7114108 | 1162459 | --- | --- | --- | 1,36 | down |
| 6407568 | 7103337 | 1135964 | --- | --- | --- | 1,03 | down |
| 6407668 | 7363674 | 1778443 | --- | --- | --- | 1,58 | down |

|         |         |         |     |     |     |      |      |
|---------|---------|---------|-----|-----|-----|------|------|
| 6407730 | 7332970 | 1702533 | --- | --- | --- | 1,10 | up   |
| 6407748 | 7217679 | 1417302 | --- | --- | --- | 1,75 | down |
| 6407780 | 7213908 | 1407686 | --- | --- | --- | 1,04 | down |
| 6407801 | 7181590 | 1329429 | --- | --- | --- | 1,02 | down |
| 6407867 | 7378997 | 1818656 | --- | --- | --- | 1,09 | down |
| 6407892 | 7111361 | 1155580 | --- | --- | --- | 1,57 | down |
| 6407938 | 7068259 | 1051627 | --- | --- | --- | 1,12 | down |
| 6407987 | 7189184 | 1347568 | --- | --- | --- | 1,41 | down |
| 6408096 | 7054958 | 1020578 | --- | --- | --- | 1,05 | up   |
| 6408102 | 7277783 | 1567455 | --- | --- | --- | 2,25 | down |
| 6408265 | 7112225 | 1157550 | --- | --- | --- | 1,11 | up   |
| 6408530 | 7064732 | 1042918 | --- | --- | --- | 1,27 | up   |
| 6408751 | 7180861 | 1327184 | --- | --- | --- | 1,04 | up   |
| 6408761 | 7267380 | 1540403 | --- | --- | --- | 1,40 | down |
| 6408883 | 7338807 | 1716827 | --- | --- | --- | 1,48 | down |
| 6408920 | 7243098 | 1480752 | --- | --- | --- | 1,39 | up   |
| 6408975 | 7298692 | 1618406 | --- | --- | --- | 1,32 | up   |
| 6408988 | 7231835 | 1452285 | --- | --- | --- | 1,22 | up   |
| 6409026 | 7065655 | 1045261 | --- | --- | --- | 1,22 | down |
| 6409107 | 7240569 | 1475451 | --- | --- | --- | 1,02 | down |
| 6409111 | 7274892 | 1559553 | --- | --- | --- | 1,02 | down |
| 6409127 | 7247228 | 1490525 | --- | --- | --- | 1,31 | down |
| 6409175 | 7371643 | 1800658 | --- | --- | --- | 1,03 | up   |
| 6409197 | 7235521 | 1462150 | --- | --- | --- | 1,09 | up   |
| 6409249 | 7350489 | 1746112 | --- | --- | --- | 1,48 | up   |
| 6409326 | 7112225 | 1157547 | --- | --- | --- | 1,01 | down |
| 6409336 | 7363674 | 1778405 | --- | --- | --- | 1,24 | down |
| 6409523 | 7243647 | 1482430 | --- | --- | --- | 1,04 | down |
| 6409559 | 7372840 | 1803770 | --- | --- | --- | 1,30 | down |
| 6409594 | 7349882 | 1744784 | --- | --- | --- | 3,16 | up   |
| 6409840 | 7234195 | 1458973 | --- | --- | --- | 1,07 | up   |
| 6409888 | 7371643 | 1800649 | --- | --- | --- | 1,00 | down |
| 6409930 | 7265259 | 1535441 | --- | --- | --- | 1,53 | down |
| 6410039 | 7277783 | 1567419 | --- | --- | --- | 3,08 | down |
| 6410185 | 7258520 | 1518872 | --- | --- | --- | 1,02 | down |
| 6410214 | 7319486 | 1670931 | --- | --- | --- | 1,02 | down |
| 6410288 | 7078666 | 1076507 | --- | --- | --- | 2,11 | down |
| 6410539 | 7049332 | 1008177 | --- | --- | --- | 1,04 | up   |
| 6410851 | 7247229 | 1490540 | --- | --- | --- | 1,06 | up   |
| 6410853 | 7294264 | 1606839 | --- | --- | --- | 1,25 | up   |
| 6410870 | 7112225 | 1157614 | --- | --- | --- | 1,19 | down |
| 6410955 | 7184850 | 1337612 | --- | --- | --- | 1,13 | up   |
| 6411105 | 7233425 | 1456777 | --- | --- | --- | 1,01 | down |
| 6411351 | 7352100 | 1750192 | --- | --- | --- | 2,42 | up   |
| 6411399 | 7339110 | 1717611 | --- | --- | --- | 1,24 | up   |
| 6411511 | 7092965 | 1110161 | --- | --- | --- | 1,31 | down |
| 6411546 | 7043535 | 994083  | --- | --- | --- | 1,04 | up   |
| 6411643 | 7290585 | 1598178 | --- | --- | --- | 1,12 | up   |
| 6411705 | 7267380 | 1540403 | --- | --- | --- | 1,17 | down |
| 6411846 | 7253408 | 1505934 | --- | --- | --- | 1,84 | down |
| 6411920 | 7352046 | 1750029 | --- | --- | --- | 1,63 | up   |
| 6412042 | 7331297 | 1698810 | --- | --- | --- | 1,51 | up   |
| 6412057 | 7131550 | 1205558 | --- | --- | --- | 1,07 | up   |
| 6412153 | 7358048 | 1764795 | --- | --- | --- | 1,22 | up   |
| 6412177 | 7139709 | 1225074 | --- | --- | --- | 1,12 | down |
| 6412181 | 7193056 | 1358276 | --- | --- | --- | 1,15 | down |

|         |         |         |     |     |     |      |      |
|---------|---------|---------|-----|-----|-----|------|------|
| 6412262 | 7248790 | 1494541 | --- | --- | --- | 1,07 | up   |
| 6412291 | 7068259 | 1051607 | --- | --- | --- | 1,27 | up   |
| 6412393 | 7365093 | 1781620 | --- | --- | --- | 1,14 | down |
| 6412443 | 7374790 | 1808768 | --- | --- | --- | 1,06 | up   |
| 6412508 | 7210599 | 1400512 | --- | --- | --- | 1,12 | down |
| 6412569 | 7068259 | 1051629 | --- | --- | --- | 1,21 | up   |
| 6412590 | 7133612 | 1210233 | --- | --- | --- | 1,10 | down |
| 6412596 | 7256191 | 1512862 | --- | --- | --- | 2,50 | down |
| 6412608 | 7237719 | 1467477 | --- | --- | --- | 1,25 | up   |
| 6412727 | 7156052 | 1265784 | --- | --- | --- | 1,08 | up   |
| 6412753 | 7340757 | 1721904 | --- | --- | --- | 1,09 | up   |
| 6412964 | 7254405 | 1508669 | --- | --- | --- | 1,14 | down |
| 6412971 | 7184981 | 1337837 | --- | --- | --- | 1,07 | up   |
| 6413044 | 7243603 | 1482287 | --- | --- | --- | 1,71 | down |
| 6413121 | 7247334 | 1490818 | --- | --- | --- | 1,18 | down |
| 6413132 | 7238199 | 1468926 | --- | --- | --- | 1,15 | up   |
| 6413138 | 7269637 | 1546235 | --- | --- | --- | 2,28 | down |
| 6413246 | 7363132 | 1776955 | --- | --- | --- | 1,09 | up   |
| 6413280 | 7248790 | 1494540 | --- | --- | --- | 1,09 | down |
| 6413338 | 7161992 | 1280152 | --- | --- | --- | 1,42 | up   |
| 6413438 | 7373732 | 1805973 | --- | --- | --- | 1,06 | down |
| 6413613 | 7358048 | 1764825 | --- | --- | --- | 1,27 | up   |
| 6413668 | 7148978 | 1248544 | --- | --- | --- | 1,03 | up   |
| 6413819 | 7171525 | 1303444 | --- | --- | --- | 1,18 | up   |
| 6413822 | 7289909 | 1596508 | --- | --- | --- | 1,30 | down |
| 6413935 | 7258520 | 1518868 | --- | --- | --- | 1,29 | down |
| 6413941 | 7373678 | 1805861 | --- | --- | --- | 1,78 | up   |
| 6414014 | 7377583 | 1815451 | --- | --- | --- | 1,30 | down |
| 6414263 | 7286807 | 1588784 | --- | --- | --- | 1,84 | down |
| 6414428 | 7030127 | 960865  | --- | --- | --- | 1,57 | up   |
| 6414542 | 7131764 | 1205854 | --- | --- | --- | 1,27 | up   |
| 6414603 | 7097525 | 1121056 | --- | --- | --- | 1,29 | down |
| 6414607 | 7330238 | 1695949 | --- | --- | --- | 1,54 | up   |
| 6414642 | 7280743 | 1574560 | --- | --- | --- | 1,03 | up   |
| 6414667 | 7378997 | 1818645 | --- | --- | --- | 1,13 | up   |
| 6414730 | 7367994 | 1789245 | --- | --- | --- | 1,24 | up   |
| 6414735 | 7174281 | 1310876 | --- | --- | --- | 1,06 | up   |
| 6414801 | 7357815 | 1764147 | --- | --- | --- | 1,48 | down |
| 6414817 | 7248964 | 1494948 | --- | --- | --- | 1,34 | up   |
| 6414852 | 7316644 | 1664032 | --- | --- | --- | 1,14 | up   |
| 6414864 | 7069830 | 1055620 | --- | --- | --- | 1,10 | down |
| 6414921 | 7061367 | 1034851 | --- | --- | --- | 1,03 | up   |
| 6414927 | 7330396 | 1696361 | --- | --- | --- | 1,39 | down |
| 6414937 | 7147809 | 1245455 | --- | --- | --- | 1,23 | down |
| 6414958 | 7338807 | 1716779 | --- | --- | --- | 1,01 | up   |
| 6414994 | 7186443 | 1341310 | --- | --- | --- | 1,25 | down |
| 6415050 | 7098411 | 1123691 | --- | --- | --- | 1,06 | down |
| 6415129 | 7196029 | 1365606 | --- | --- | --- | 1,05 | up   |
| 6415166 | 7380497 | 1821863 | --- | --- | --- | 1,04 | up   |
| 6415267 | 7087282 | 1096160 | --- | --- | --- | 1,21 | up   |
| 6415345 | 7316644 | 1664017 | --- | --- | --- | 1,79 | down |
| 6415428 | 7373906 | 1806357 | --- | --- | --- | 1,38 | down |
| 6415599 | 7116614 | 1168787 | --- | --- | --- | 1,43 | down |
| 6415623 | 7210263 | 1399763 | --- | --- | --- | 1,02 | up   |
| 6415648 | 7344702 | 1732140 | --- | --- | --- | 1,03 | up   |
| 6415667 | 7041584 | 989454  | --- | --- | --- | 1,44 | down |

|         |         |         |     |     |     |      |      |
|---------|---------|---------|-----|-----|-----|------|------|
| 6415713 | 7039463 | 984245  | --- | --- | --- | 1,17 | down |
| 6415767 | 7289909 | 1596509 | --- | --- | --- | 1,70 | up   |
| 6415901 | 7339379 | 1718348 | --- | --- | --- | 1,10 | down |
| 6415934 | 7102976 | 1135045 | --- | --- | --- | 1,09 | up   |
| 6416015 | 7068259 | 1051660 | --- | --- | --- | 1,03 | up   |
| 6416389 | 7374740 | 1808618 | --- | --- | --- | 1,16 | up   |
| 6416437 | 7059584 | 1030546 | --- | --- | --- | 1,09 | down |
| 6416612 | 7321414 | 1675639 | --- | --- | --- | 1,08 | down |
| 6416620 | 7303616 | 1631385 | --- | --- | --- | 1,11 | down |
| 6416660 | 7065827 | 1045721 | --- | --- | --- | 1,03 | up   |
| 6416688 | 7167507 | 1293124 | --- | --- | --- | 1,38 | down |
| 6416796 | 7127540 | 1195274 | --- | --- | --- | 1,18 | down |
| 6416802 | 7168309 | 1295347 | --- | --- | --- | 1,37 | down |
| 6416837 | 7098126 | 1122972 | --- | --- | --- | 1,19 | up   |
| 6416890 | 7198210 | 1370994 | --- | --- | --- | 1,57 | up   |
| 6416924 | 7060851 | 1033405 | --- | --- | --- | 1,05 | up   |
| 6416993 | 7180620 | 1326388 | --- | --- | --- | 1,10 | up   |
| 6417058 | 7274892 | 1559577 | --- | --- | --- | 1,07 | down |
| 6417159 | 7336931 | 1711874 | --- | --- | --- | 1,20 | down |
| 6417201 | 7297589 | 1615624 | --- | --- | --- | 1,07 | down |
| 6417220 | 7097240 | 1120370 | --- | --- | --- | 1,16 | up   |
| 6417400 | 7156372 | 1266705 | --- | --- | --- | 1,30 | up   |
| 6417414 | 7330396 | 1696356 | --- | --- | --- | 1,20 | down |
| 6417473 | 7339379 | 1718353 | --- | --- | --- | 1,32 | down |
| 6417673 | 7053874 | 1018326 | --- | --- | --- | 1,13 | down |
| 6417684 | 7365183 | 1781907 | --- | --- | --- | 1,08 | up   |
| 6417776 | 7322020 | 1676648 | --- | --- | --- | 1,03 | down |
| 6417835 | 7170764 | 1301467 | --- | --- | --- | 1,35 | up   |
| 6418082 | 7076236 | 1071210 | --- | --- | --- | 1,20 | down |
| 6418128 | 7029078 | 958880  | --- | --- | --- | 1,08 | up   |
| 6418233 | 7246570 | 1489218 | --- | --- | --- | 1,14 | up   |
| 6418253 | 7161992 | 1280155 | --- | --- | --- | 1,08 | up   |
| 6418265 | 7120827 | 1179326 | --- | --- | --- | 1,63 | down |
| 6418266 | 7138047 | 1221231 | --- | --- | --- | 1,46 | up   |
| 6418332 | 7086975 | 1095324 | --- | --- | --- | 1,16 | up   |
| 6418354 | 7336931 | 1711872 | --- | --- | --- | 1,24 | up   |
| 6418445 | 7240569 | 1475484 | --- | --- | --- | 1,05 | down |
| 6418557 | 7297589 | 1615666 | --- | --- | --- | 1,03 | down |
| 6418634 | 7253272 | 1505515 | --- | --- | --- | 1,42 | up   |
| 6418684 | 7360486 | 1770961 | --- | --- | --- | 1,20 | up   |
| 6418695 | 7344406 | 1731218 | --- | --- | --- | 1,29 | up   |
| 6418697 | 7036412 | 976875  | --- | --- | --- | 1,08 | up   |
| 6418722 | 7060851 | 1033406 | --- | --- | --- | 1,01 | down |
| 6418811 | 7161841 | 1279881 | --- | --- | --- | 1,06 | down |
| 6419033 | 7154655 | 1262315 | --- | --- | --- | 1,47 | down |
| 6419067 | 7186106 | 1340496 | --- | --- | --- | 1,61 | up   |
| 6419279 | 7281923 | 1577699 | --- | --- | --- | 1,06 | up   |
| 6419380 | 7027797 | 956300  | --- | --- | --- | 1,21 | down |
| 6419391 | 7083160 | 1086541 | --- | --- | --- | 1,03 | down |
| 6419516 | 7199476 | 1374562 | --- | --- | --- | 1,08 | down |
| 6419522 | 7351951 | 1749826 | --- | --- | --- | 1,13 | up   |
| 6419580 | 7069253 | 1054150 | --- | --- | --- | 1,23 | up   |
| 6419624 | 7039223 | 983554  | --- | --- | --- | 1,14 | down |
| 6419708 | 7041061 | 988083  | --- | --- | --- | 1,31 | down |
| 6419762 | 7318143 | 1668094 | --- | --- | --- | 1,22 | down |
| 6419990 | 7072225 | 1061401 | --- | --- | --- | 1,03 | down |



|         |         |         |     |     |     |      |      |
|---------|---------|---------|-----|-----|-----|------|------|
| 6420033 | 7323545 | 1679923 | --- | --- | --- | 1,38 | down |
| 6420059 | 7364346 | 1780011 | --- | --- | --- | 1,13 | down |
| 6420093 | 7037764 | 980085  | --- | --- | --- | 1,05 | up   |
| 6420188 | 7071714 | 1060351 | --- | --- | --- | 1,15 | down |
| 6420286 | 7068073 | 1051175 | --- | --- | --- | 1,43 | up   |
| 6420288 | 7105814 | 1141776 | --- | --- | --- | 1,27 | down |
| 6420320 | 7025652 | 950278  | --- | --- | --- | 1,72 | up   |
| 6420370 | 7058713 | 1028661 | --- | --- | --- | 1,03 | down |
| 6420373 | 7303616 | 1631346 | --- | --- | --- | 1,14 | up   |
| 6420412 | 7343122 | 1727748 | --- | --- | --- | 1,65 | down |
| 6420470 | 7336931 | 1711868 | --- | --- | --- | 1,05 | up   |
| 6420572 | 7188681 | 1346289 | --- | --- | --- | 1,26 | up   |
| 6420650 | 7096859 | 1119326 | --- | --- | --- | 1,08 | down |
| 6420663 | 7263401 | 1530950 | --- | --- | --- | 1,86 | down |
| 6420808 | 7101258 | 1130558 | --- | --- | --- | 1,49 | down |
| 6420924 | 7217747 | 1417462 | --- | --- | --- | 1,13 | up   |
| 6420985 | 7099449 | 1126374 | --- | --- | --- | 1,02 | up   |
| 6421082 | 7070455 | 1057351 | --- | --- | --- | 1,04 | down |
| 6421169 | 7248790 | 1494511 | --- | --- | --- | 1,22 | down |
| 6421323 | 7030454 | 961553  | --- | --- | --- | 1,09 | up   |
| 6421375 | 7332059 | 1700725 | --- | --- | --- | 1,28 | up   |
| 6421383 | 7285061 | 1585156 | --- | --- | --- | 1,24 | down |
| 6421464 | 7337224 | 1712605 | --- | --- | --- | 1,12 | up   |
| 6421526 | 7273744 | 1557007 | --- | --- | --- | 1,36 | down |
| 6421559 | 7102113 | 1132835 | --- | --- | --- | 1,18 | up   |
| 6421607 | 7034293 | 971981  | --- | --- | --- | 1,22 | down |
| 6421639 | 7112566 | 1158632 | --- | --- | --- | 1,13 | down |
| 6421645 | 7249503 | 1496226 | --- | --- | --- | 1,11 | up   |
| 6421659 | 7196966 | 1367642 | --- | --- | --- | 1,06 | up   |
| 6421706 | 7336835 | 1711599 | --- | --- | --- | 1,87 | down |
| 6421766 | 7155286 | 1263908 | --- | --- | --- | 1,67 | down |
| 6421790 | 7050167 | 1009815 | --- | --- | --- | 1,14 | down |
| 6421797 | 7033616 | 970190  | --- | --- | --- | 1,02 | up   |
| 6421842 | 7189689 | 1349055 | --- | --- | --- | 1,02 | up   |
| 6421907 | 7180721 | 1326695 | --- | --- | --- | 1,25 | up   |
| 6421909 | 7258670 | 1519349 | --- | --- | --- | 1,33 | down |
| 6422086 | 7049689 | 1008898 | --- | --- | --- | 1,69 | up   |
| 6422176 | 7243653 | 1482540 | --- | --- | --- | 1,97 | down |
| 6422181 | 7073673 | 1065087 | --- | --- | --- | 1,13 | down |
| 6422267 | 7337522 | 1713619 | --- | --- | --- | 2,36 | down |
| 6422333 | 7276650 | 1564126 | --- | --- | --- | 1,32 | up   |
| 6422345 | 7331413 | 1699128 | --- | --- | --- | 1,17 | down |
| 6422452 | 7049399 | 1008383 | --- | --- | --- | 1,26 | up   |
| 6422500 | 7098867 | 1124960 | --- | --- | --- | 1,03 | up   |
| 6422547 | 7113483 | 1161011 | --- | --- | --- | 1,71 | up   |
| 6422588 | 7280743 | 1574522 | --- | --- | --- | 1,27 | up   |
| 6422591 | 7371677 | 1800754 | --- | --- | --- | 1,14 | down |
| 6422608 | 7235069 | 1460987 | --- | --- | --- | 1,02 | up   |
| 6422844 | 7068259 | 1051593 | --- | --- | --- | 1,21 | up   |
| 6422870 | 7254405 | 1508638 | --- | --- | --- | 3,79 | down |
| 6423032 | 7364346 | 1780002 | --- | --- | --- | 1,04 | up   |
| 6423088 | 7364346 | 1780024 | --- | --- | --- | 1,05 | down |
| 6423122 | 7235069 | 1460970 | --- | --- | --- | 1,40 | up   |
| 6423144 | 7133612 | 1210234 | --- | --- | --- | 1,12 | up   |
| 6423188 | 7078666 | 1076510 | --- | --- | --- | 2,29 | down |
| 6423283 | 7235426 | 1461847 | --- | --- | --- | 1,01 | up   |

|         |         |         |     |     |     |      |      |
|---------|---------|---------|-----|-----|-----|------|------|
| 6423347 | 7321029 | 1674824 | --- | --- | --- | 1,57 | up   |
| 6423385 | 7368565 | 1791285 | --- | --- | --- | 1,20 | up   |
| 6423393 | 7264274 | 1533173 | --- | --- | --- | 1,22 | up   |
| 6423418 | 7244288 | 1484108 | --- | --- | --- | 2,52 | up   |
| 6423419 | 7147809 | 1245472 | --- | --- | --- | 1,07 | up   |
| 6423628 | 7118356 | 1173133 | --- | --- | --- | 1,22 | up   |
| 6423639 | 7267953 | 1542264 | --- | --- | --- | 1,14 | up   |
| 6423708 | 7303616 | 1631309 | --- | --- | --- | 1,02 | down |
| 6423817 | 7104977 | 1140169 | --- | --- | --- | 1,55 | up   |
| 6423872 | 7243130 | 1480855 | --- | --- | --- | 1,06 | up   |
| 6424044 | 7093936 | 1112464 | --- | --- | --- | 1,09 | up   |
| 6424071 | 7256191 | 1512870 | --- | --- | --- | 1,18 | up   |
| 6424080 | 7148978 | 1248461 | --- | --- | --- | 1,01 | down |
| 6424124 | 7139708 | 1225066 | --- | --- | --- | 1,23 | up   |
| 6424172 | 7303616 | 1631334 | --- | --- | --- | 1,02 | up   |
| 6424252 | 7070616 | 1057771 | --- | --- | --- | 1,37 | up   |
| 6424259 | 7038969 | 982974  | --- | --- | --- | 2,11 | up   |
| 6424279 | 7199476 | 1374553 | --- | --- | --- | 1,29 | up   |
| 6424299 | 7065655 | 1045268 | --- | --- | --- | 1,51 | down |
| 6424346 | 7078666 | 1076528 | --- | --- | --- | 1,60 | up   |
| 6424422 | 7363576 | 1778196 | --- | --- | --- | 2,24 | up   |
| 6424487 | 7253408 | 1505951 | --- | --- | --- | 1,32 | up   |
| 6424514 | 7059449 | 1030298 | --- | --- | --- | 1,07 | up   |
| 6424612 | 7345851 | 1734747 | --- | --- | --- | 2,06 | down |
| 6424886 | 7350237 | 1745472 | --- | --- | --- | 1,24 | down |
| 6424957 | 7279568 | 1572023 | --- | --- | --- | 1,93 | up   |
| 6424965 | 7256191 | 1512869 | --- | --- | --- | 1,39 | down |
| 6425040 | 7370484 | 1797177 | --- | --- | --- | 1,03 | down |
| 6425199 | 7108062 | 1147192 | --- | --- | --- | 1,15 | up   |
| 6425266 | 7331434 | 1699230 | --- | --- | --- | 1,30 | down |
| 6425290 | 7195903 | 1365331 | --- | --- | --- | 1,03 | down |
| 6425341 | 7341253 | 1723299 | --- | --- | --- | 1,51 | down |
| 6425344 | 7069830 | 1055635 | --- | --- | --- | 1,16 | down |
| 6425385 | 7359551 | 1768623 | --- | --- | --- | 1,38 | up   |
| 6425431 | 7241163 | 1476819 | --- | --- | --- | 1,41 | down |
| 6425448 | 7078198 | 1075607 | --- | --- | --- | 2,01 | down |
| 6425453 | 7065110 | 1044142 | --- | --- | --- | 1,08 | up   |
| 6425614 | 7284359 | 1583435 | --- | --- | --- | 1,00 | down |
| 6425674 | 7277719 | 1567095 | --- | --- | --- | 1,00 | up   |
| 6425772 | 7267802 | 1541908 | --- | --- | --- | 1,51 | up   |
| 6425807 | 7186464 | 1341376 | --- | --- | --- | 1,03 | down |
| 6425825 | 7179914 | 1324716 | --- | --- | --- | 1,08 | up   |
| 6425942 | 7050726 | 1011253 | --- | --- | --- | 1,01 | up   |
| 6425954 | 7322388 | 1677325 | --- | --- | --- | 1,04 | down |
| 6425955 | 7236851 | 1465382 | --- | --- | --- | 1,16 | up   |
| 6425969 | 7031774 | 964785  | --- | --- | --- | 1,02 | up   |
| 6426023 | 7237438 | 1466786 | --- | --- | --- | 1,20 | up   |
| 6426025 | 7361420 | 1773035 | --- | --- | --- | 1,25 | down |
| 6426100 | 7330737 | 1697221 | --- | --- | --- | 1,32 | up   |
| 6426119 | 7118196 | 1172698 | --- | --- | --- | 1,13 | down |
| 6426175 | 7142416 | 1231794 | --- | --- | --- | 1,88 | up   |
| 6426201 | 7148978 | 1248508 | --- | --- | --- | 1,35 | up   |
| 6426346 | 7112225 | 1157623 | --- | --- | --- | 1,08 | up   |
| 6426428 | 7168858 | 1296822 | --- | --- | --- | 1,08 | down |
| 6426483 | 7236395 | 1464322 | --- | --- | --- | 1,03 | down |
| 6426543 | 7345882 | 1734812 | --- | --- | --- | 1,30 | up   |

|         |         |         |     |     |     |      |      |
|---------|---------|---------|-----|-----|-----|------|------|
| 6426579 | 7062173 | 1036991 | --- | --- | --- | 1,21 | down |
| 6426818 | 7055781 | 1022269 | --- | --- | --- | 2,39 | down |
| 6426888 | 7302786 | 1628861 | --- | --- | --- | 1,02 | down |
| 6426904 | 7039223 | 983562  | --- | --- | --- | 1,06 | down |
| 6426934 | 7244288 | 1484135 | --- | --- | --- | 1,00 | down |
| 6426937 | 7214605 | 1409369 | --- | --- | --- | 1,11 | down |
| 6426973 | 7132024 | 1206345 | --- | --- | --- | 1,09 | down |
| 6427030 | 7087492 | 1096700 | --- | --- | --- | 1,12 | up   |
| 6427118 | 7112225 | 1157593 | --- | --- | --- | 1,00 | down |
| 6427209 | 7159027 | 1272741 | --- | --- | --- | 1,07 | down |
| 6427331 | 7038669 | 982193  | --- | --- | --- | 1,01 | down |
| 6427441 | 7099573 | 1126708 | --- | --- | --- | 1,29 | down |
| 6427449 | 7281950 | 1577782 | --- | --- | --- | 2,16 | up   |
| 6427507 | 7127691 | 1195630 | --- | --- | --- | 1,28 | up   |
| 6427512 | 7364346 | 1780022 | --- | --- | --- | 1,24 | down |
| 6427540 | 7127691 | 1195641 | --- | --- | --- | 1,02 | up   |
| 6427641 | 7235323 | 1461558 | --- | --- | --- | 1,39 | down |
| 6427723 | 7286807 | 1588834 | --- | --- | --- | 1,16 | down |
| 6427846 | 7192186 | 1355615 | --- | --- | --- | 1,01 | down |
| 6427889 | 7031774 | 964662  | --- | --- | --- | 1,27 | down |
| 6427944 | 7172373 | 1305562 | --- | --- | --- | 1,07 | down |
| 6427969 | 7263152 | 1530379 | --- | --- | --- | 1,13 | up   |
| 6427981 | 7208330 | 1395099 | --- | --- | --- | 1,60 | down |
| 6428085 | 7064468 | 1042354 | --- | --- | --- | 1,00 | up   |
| 6428107 | 7198274 | 1371205 | --- | --- | --- | 1,52 | up   |
| 6428146 | 7258670 | 1519348 | --- | --- | --- | 1,26 | down |
| 6428182 | 7196029 | 1365614 | --- | --- | --- | 1,04 | up   |
| 6428280 | 7337260 | 1712797 | --- | --- | --- | 2,07 | down |
| 6428365 | 7293757 | 1605674 | --- | --- | --- | 1,09 | up   |
| 6428583 | 7123357 | 1185595 | --- | --- | --- | 1,21 | up   |
| 6428634 | 7325674 | 1685228 | --- | --- | --- | 1,19 | down |
| 6428779 | 7267802 | 1541743 | --- | --- | --- | 1,33 | down |
| 6428796 | 7075424 | 1069278 | --- | --- | --- | 1,11 | down |
| 6428815 | 7235426 | 1461847 | --- | --- | --- | 1,10 | up   |
| 6428927 | 7303616 | 1631384 | --- | --- | --- | 1,37 | up   |
| 6429016 | 7236254 | 1464062 | --- | --- | --- | 1,42 | up   |
| 6429069 | 7299512 | 1620550 | --- | --- | --- | 1,29 | up   |
| 6429078 | 7368374 | 1790645 | --- | --- | --- | 1,30 | up   |
| 6429100 | 7225553 | 1435974 | --- | --- | --- | 1,33 | up   |
| 6429119 | 7344702 | 1732143 | --- | --- | --- | 1,25 | up   |
| 6429162 | 7219605 | 1422053 | --- | --- | --- | 1,09 | up   |
| 6429234 | 7341546 | 1723955 | --- | --- | --- | 1,05 | up   |
| 6429339 | 7361420 | 1773047 | --- | --- | --- | 1,02 | down |
| 6429390 | 7303722 | 1631712 | --- | --- | --- | 1,71 | down |
| 6429398 | 7217747 | 1417501 | --- | --- | --- | 1,12 | down |
| 6429415 | 7295410 | 1609794 | --- | --- | --- | 1,14 | up   |
| 6429509 | 7337492 | 1713403 | --- | --- | --- | 1,04 | up   |
| 6429539 | 7111361 | 1155623 | --- | --- | --- | 1,11 | up   |
| 6429579 | 7180861 | 1327223 | --- | --- | --- | 1,07 | up   |
| 6429594 | 7171034 | 1302291 | --- | --- | --- | 1,20 | up   |
| 6429671 | 7067670 | 1050341 | --- | --- | --- | 1,26 | down |
| 6429684 | 7080106 | 1079733 | --- | --- | --- | 1,10 | up   |
| 6429744 | 7097485 | 1120934 | --- | --- | --- | 1,22 | down |
| 6429757 | 7315571 | 1661011 | --- | --- | --- | 1,35 | up   |
| 6429857 | 7112225 | 1157526 | --- | --- | --- | 1,55 | down |
| 6429892 | 7253272 | 1505613 | --- | --- | --- | 1,14 | up   |

|         |         |         |     |     |     |      |      |
|---------|---------|---------|-----|-----|-----|------|------|
| 6429897 | 7246866 | 1489791 | --- | --- | --- | 1,16 | down |
| 6429979 | 7379957 | 1820638 | --- | --- | --- | 1,08 | up   |
| 6430193 | 7311218 | 1650355 | --- | --- | --- | 1,02 | down |
| 6430225 | 7188681 | 1346298 | --- | --- | --- | 1,15 | down |
| 6430242 | 7297589 | 1615685 | --- | --- | --- | 1,21 | up   |
| 6430273 | 7356115 | 1760120 | --- | --- | --- | 1,14 | up   |
| 6430309 | 7249503 | 1496218 | --- | --- | --- | 1,25 | up   |
| 6430357 | 7337260 | 1712809 | --- | --- | --- | 1,02 | up   |
| 6430429 | 7307349 | 1640981 | --- | --- | --- | 2,04 | down |
| 6430487 | 7167507 | 1293117 | --- | --- | --- | 1,11 | up   |
| 6430553 | 7350013 | 1745095 | --- | --- | --- | 1,08 | up   |
| 6430606 | 7210263 | 1399759 | --- | --- | --- | 1,11 | up   |
| 6430756 | 7039223 | 983553  | --- | --- | --- | 1,63 | up   |
| 6430854 | 7083030 | 1086244 | --- | --- | --- | 1,05 | up   |
| 6430888 | 7293234 | 1604358 | --- | --- | --- | 1,17 | down |
| 6430896 | 7373678 | 1805858 | --- | --- | --- | 1,11 | up   |
| 6430916 | 7229909 | 1447246 | --- | --- | --- | 1,20 | down |
| 6430957 | 7206133 | 1389960 | --- | --- | --- | 1,12 | down |
| 6431011 | 7290793 | 1598636 | --- | --- | --- | 1,22 | up   |
| 6431078 | 7340838 | 1722069 | --- | --- | --- | 1,07 | up   |
| 6431167 | 7127691 | 1195637 | --- | --- | --- | 1,54 | down |
| 6431239 | 7155116 | 1263439 | --- | --- | --- | 1,19 | up   |
| 6431365 | 7098411 | 1123699 | --- | --- | --- | 1,01 | up   |
| 6431374 | 7376566 | 1812854 | --- | --- | --- | 1,08 | down |
| 6431509 | 7171525 | 1303444 | --- | --- | --- | 1,16 | down |
| 6431583 | 7297274 | 1614630 | --- | --- | --- | 1,00 | down |
| 6431589 | 7177520 | 1318669 | --- | --- | --- | 1,39 | down |
| 6431653 | 7193056 | 1358263 | --- | --- | --- | 1,26 | down |
| 6431660 | 7356333 | 1760508 | --- | --- | --- | 1,44 | up   |
| 6431662 | 7363674 | 1778441 | --- | --- | --- | 1,30 | up   |
| 6431704 | 7269641 | 1546250 | --- | --- | --- | 1,10 | down |
| 6431766 | 7067670 | 1050309 | --- | --- | --- | 2,19 | up   |
| 6431783 | 7267380 | 1540398 | --- | --- | --- | 1,11 | up   |
| 6431866 | 7042382 | 991295  | --- | --- | --- | 1,21 | down |
| 6432029 | 7068259 | 1051616 | --- | --- | --- | 1,72 | down |
| 6432053 | 7277783 | 1567460 | --- | --- | --- | 1,06 | up   |
| 6432061 | 7176456 | 1315836 | --- | --- | --- | 1,08 | down |
| 6432066 | 7181026 | 1327843 | --- | --- | --- | 1,32 | down |
| 6432168 | 7198210 | 1371000 | --- | --- | --- | 1,23 | down |
| 6432289 | 7174149 | 1310499 | --- | --- | --- | 1,02 | up   |
| 6432367 | 7034293 | 971968  | --- | --- | --- | 1,33 | down |
| 6432463 | 7218728 | 1419919 | --- | --- | --- | 1,30 | up   |
| 6432661 | 7177180 | 1317763 | --- | --- | --- | 1,11 | down |
| 6432846 | 7073854 | 1065616 | --- | --- | --- | 1,29 | up   |
| 6432995 | 7378997 | 1818636 | --- | --- | --- | 1,03 | up   |
| 6433031 | 7117158 | 1170035 | --- | --- | --- | 1,37 | down |
| 6433094 | 7049399 | 1008420 | --- | --- | --- | 1,25 | down |
| 6433189 | 7273223 | 1555898 | --- | --- | --- | 1,34 | up   |
| 6433265 | 7273223 | 1555892 | --- | --- | --- | 1,31 | up   |
| 6433318 | 7155116 | 1263412 | --- | --- | --- | 1,54 | up   |
| 6433425 | 7172988 | 1307338 | --- | --- | --- | 1,06 | down |
| 6433432 | 7084993 | 1090677 | --- | --- | --- | 1,11 | down |
| 6433608 | 7181105 | 1327967 | --- | --- | --- | 1,48 | down |
| 6433621 | 7041609 | 989593  | --- | --- | --- | 1,58 | down |
| 6433668 | 7096859 | 1119305 | --- | --- | --- | 1,38 | up   |
| 6433744 | 7312621 | 1653459 | --- | --- | --- | 1,32 | down |

|         |         |         |     |     |     |      |      |
|---------|---------|---------|-----|-----|-----|------|------|
| 6433756 | 7379957 | 1820631 | --- | --- | --- | 1,10 | down |
| 6433807 | 7336835 | 1711605 | --- | --- | --- | 1,61 | down |
| 6433827 | 7213945 | 1407829 | --- | --- | --- | 1,02 | up   |
| 6433852 | 7183182 | 1333575 | --- | --- | --- | 1,71 | down |
| 6433919 | 7067670 | 1050363 | --- | --- | --- | 1,32 | down |
| 6433921 | 7260613 | 1524267 | --- | --- | --- | 1,21 | down |
| 6433973 | 7276231 | 1563104 | --- | --- | --- | 1,34 | down |
| 6434052 | 7217679 | 1417305 | --- | --- | --- | 1,13 | up   |
| 6434237 | 7186464 | 1341362 | --- | --- | --- | 1,60 | down |
| 6434303 | 7069253 | 1054169 | --- | --- | --- | 1,20 | up   |
| 6434363 | 7341253 | 1723260 | --- | --- | --- | 1,03 | down |
| 6434457 | 7235069 | 1460967 | --- | --- | --- | 1,46 | up   |
| 6434501 | 7096886 | 1119431 | --- | --- | --- | 1,05 | up   |
| 6434559 | 7233012 | 1455404 | --- | --- | --- | 1,02 | up   |
| 6434587 | 7264797 | 1534422 | --- | --- | --- | 1,09 | down |
| 6434592 | 7224166 | 1432698 | --- | --- | --- | 1,27 | down |
| 6434622 | 7244290 | 1484151 | --- | --- | --- | 1,32 | up   |
| 6434625 | 7384365 | 1830284 | --- | --- | --- | 1,01 | up   |
| 6434649 | 7263248 | 1530616 | --- | --- | --- | 1,03 | down |
| 6434718 | 7367969 | 1789087 | --- | --- | --- | 1,72 | up   |
| 6434729 | 7060851 | 1033443 | --- | --- | --- | 1,19 | down |
| 6434747 | 7273251 | 1555943 | --- | --- | --- | 1,79 | down |
| 6434825 | 7087492 | 1096697 | --- | --- | --- | 1,45 | down |
| 6434926 | 7118356 | 1173179 | --- | --- | --- | 1,49 | down |
| 6434979 | 7284359 | 1583435 | --- | --- | --- | 1,27 | up   |
| 6435043 | 7188829 | 1346667 | --- | --- | --- | 1,28 | down |
| 6435119 | 7067670 | 1050351 | --- | --- | --- | 1,45 | up   |
| 6435208 | 7311218 | 1650349 | --- | --- | --- | 1,24 | up   |
| 6435243 | 7084792 | 1090329 | --- | --- | --- | 1,09 | up   |
| 6435245 | 7378997 | 1818653 | --- | --- | --- | 1,07 | down |
| 6435477 | 7194172 | 1361148 | --- | --- | --- | 1,12 | up   |
| 6435479 | 7122131 | 1182668 | --- | --- | --- | 1,15 | down |
| 6435545 | 7041609 | 989580  | --- | --- | --- | 1,64 | down |
| 6435706 | 7065266 | 1044580 | --- | --- | --- | 1,53 | up   |
| 6435707 | 7127797 | 1195853 | --- | --- | --- | 1,00 | up   |
| 6435863 | 7179143 | 1322789 | --- | --- | --- | 1,36 | down |
| 6436009 | 7132125 | 1206612 | --- | --- | --- | 1,03 | up   |
| 6436095 | 7334347 | 1705751 | --- | --- | --- | 1,53 | up   |
| 6436140 | 7258520 | 1518893 | --- | --- | --- | 1,09 | down |
| 6436392 | 7236851 | 1465392 | --- | --- | --- | 1,13 | up   |
| 6436606 | 7030454 | 961542  | --- | --- | --- | 1,06 | up   |
| 6436659 | 7240224 | 1474391 | --- | --- | --- | 1,02 | down |
| 6436680 | 7198210 | 1370975 | --- | --- | --- | 1,02 | up   |
| 6436690 | 7363674 | 1778441 | --- | --- | --- | 1,05 | up   |
| 6436825 | 7273223 | 1555901 | --- | --- | --- | 1,32 | down |
| 6436834 | 7290585 | 1598182 | --- | --- | --- | 1,35 | down |
| 6436868 | 7316644 | 1664061 | --- | --- | --- | 1,03 | down |
| 6436899 | 7179785 | 1324498 | --- | --- | --- | 1,87 | down |
| 6437009 | 7364948 | 1781227 | --- | --- | --- | 1,54 | up   |
| 6437024 | 7102113 | 1132845 | --- | --- | --- | 1,15 | down |
| 6437042 | 7243628 | 1482365 | --- | --- | --- | 1,04 | down |
| 6437058 | 7165954 | 1288810 | --- | --- | --- | 1,32 | up   |
| 6437082 | 7132125 | 1206612 | --- | --- | --- | 1,13 | up   |
| 6437084 | 7098867 | 1124951 | --- | --- | --- | 1,07 | down |
| 6437107 | 7196029 | 1365626 | --- | --- | --- | 1,04 | down |
| 6437198 | 7143904 | 1235800 | --- | --- | --- | 1,03 | up   |

|         |         |         |     |     |     |      |      |
|---------|---------|---------|-----|-----|-----|------|------|
| 6437212 | 7339110 | 1717616 | --- | --- | --- | 1,02 | up   |
| 6437233 | 7103811 | 1137057 | --- | --- | --- | 1,06 | down |
| 6437336 | 7327650 | 1689695 | --- | --- | --- | 1,04 | down |
| 6437394 | 7233440 | 1456899 | --- | --- | --- | 1,00 | down |
| 6437429 | 7146245 | 1241372 | --- | --- | --- | 1,01 | up   |
| 6437501 | 7371643 | 1800657 | --- | --- | --- | 1,47 | up   |
| 6437540 | 7371677 | 1800754 | --- | --- | --- | 1,07 | down |
| 6437628 | 7099573 | 1126717 | --- | --- | --- | 2,05 | up   |
| 6437855 | 7087965 | 1098042 | --- | --- | --- | 1,07 | up   |
| 6437865 | 7174149 | 1310514 | --- | --- | --- | 1,04 | down |
| 6437904 | 7202550 | 1381619 | --- | --- | --- | 1,06 | up   |
| 6437952 | 7360486 | 1770958 | --- | --- | --- | 1,48 | down |
| 6437961 | 7340838 | 1722080 | --- | --- | --- | 1,11 | up   |
| 6437973 | 7320337 | 1673316 | --- | --- | --- | 1,16 | up   |
| 6438060 | 7329135 | 1693495 | --- | --- | --- | 1,06 | down |
| 6438098 | 7257976 | 1517713 | --- | --- | --- | 1,21 | down |
| 6438153 | 7186443 | 1341313 | --- | --- | --- | 1,59 | down |
| 6438247 | 7340757 | 1721909 | --- | --- | --- | 1,33 | down |
| 6438272 | 7086966 | 1095260 | --- | --- | --- | 1,06 | up   |
| 6438331 | 7068143 | 1051295 | --- | --- | --- | 1,14 | up   |
| 6438347 | 7179914 | 1324710 | --- | --- | --- | 1,06 | down |
| 6438360 | 7351951 | 1749816 | --- | --- | --- | 1,29 | down |
| 6438549 | 7351951 | 1749845 | --- | --- | --- | 1,30 | up   |
| 6438863 | 7036412 | 976849  | --- | --- | --- | 1,48 | down |
| 6438907 | 7303616 | 1631332 | --- | --- | --- | 1,19 | up   |
| 6438934 | 7371253 | 1799564 | --- | --- | --- | 1,11 | down |
| 6438938 | 7265259 | 1535439 | --- | --- | --- | 1,46 | up   |
| 6438996 | 7361042 | 1772280 | --- | --- | --- | 1,17 | down |
| 6439032 | 7096924 | 1119602 | --- | --- | --- | 1,76 | down |
| 6439054 | 7210263 | 1399760 | --- | --- | --- | 1,14 | up   |
| 6439055 | 7316644 | 1664043 | --- | --- | --- | 1,39 | down |
| 6439072 | 7364346 | 1780015 | --- | --- | --- | 1,31 | down |
| 6439137 | 7233440 | 1456857 | --- | --- | --- | 1,92 | up   |
| 6439200 | 7085848 | 1092432 | --- | --- | --- | 2,13 | up   |
| 6439236 | 7068259 | 1051638 | --- | --- | --- | 1,30 | up   |
| 6439274 | 7132834 | 1208326 | --- | --- | --- | 1,08 | up   |
| 6439403 | 7038530 | 981875  | --- | --- | --- | 1,06 | up   |
| 6439405 | 7346989 | 1737521 | --- | --- | --- | 2,08 | down |
| 6439414 | 7240569 | 1475493 | --- | --- | --- | 1,08 | down |
| 6439530 | 7117187 | 1170141 | --- | --- | --- | 1,02 | down |
| 6439539 | 7360325 | 1770560 | --- | --- | --- | 1,32 | down |
| 6439541 | 7254040 | 1507579 | --- | --- | --- | 1,19 | down |
| 6439587 | 7243653 | 1482537 | --- | --- | --- | 1,02 | down |
| 6439598 | 7280743 | 1574546 | --- | --- | --- | 1,54 | down |
| 6439617 | 7260613 | 1524282 | --- | --- | --- | 1,09 | up   |
| 6439712 | 7311218 | 1650347 | --- | --- | --- | 1,15 | up   |
| 6439738 | 7094130 | 1112873 | --- | --- | --- | 1,04 | down |
| 6439819 | 7243253 | 1481232 | --- | --- | --- | 1,13 | down |
| 6439852 | 7274892 | 1559552 | --- | --- | --- | 1,23 | down |
| 6439865 | 7240569 | 1475507 | --- | --- | --- | 1,13 | up   |
| 6439888 | 7201217 | 1378758 | --- | --- | --- | 1,03 | up   |
| 6439948 | 7033337 | 969491  | --- | --- | --- | 1,17 | down |
| 6439958 | 7319937 | 1672274 | --- | --- | --- | 1,22 | up   |
| 6439967 | 7289909 | 1596506 | --- | --- | --- | 1,64 | down |
| 6440015 | 7098189 | 1123167 | --- | --- | --- | 1,25 | up   |
| 6440030 | 7316644 | 1664028 | --- | --- | --- | 1,14 | down |

|         |         |         |     |     |     |      |      |
|---------|---------|---------|-----|-----|-----|------|------|
| 6440128 | 7319151 | 1670111 | --- | --- | --- | 1,04 | down |
| 6440284 | 7162959 | 1282085 | --- | --- | --- | 1,08 | up   |
| 6440291 | 7093936 | 1112479 | --- | --- | --- | 1,02 | up   |
| 6440298 | 7247954 | 1492358 | --- | --- | --- | 1,40 | down |
| 6440331 | 7121866 | 1181854 | --- | --- | --- | 1,55 | down |
| 6440470 | 7239752 | 1473155 | --- | --- | --- | 1,28 | up   |
| 6440632 | 7244288 | 1484093 | --- | --- | --- | 1,03 | down |
| 6440686 | 7052813 | 1015884 | --- | --- | --- | 1,27 | down |
| 6440713 | 7131119 | 1204441 | --- | --- | --- | 1,12 | down |
| 6440866 | 7069142 | 1053879 | --- | --- | --- | 1,05 | up   |
| 6440948 | 7038316 | 981457  | --- | --- | --- | 1,01 | down |
| 6441178 | 7065655 | 1045270 | --- | --- | --- | 1,01 | down |
| 6441241 | 7143455 | 1234731 | --- | --- | --- | 1,44 | down |
| 6441290 | 7131764 | 1205859 | --- | --- | --- | 1,23 | down |
| 6441291 | 7064732 | 1042909 | --- | --- | --- | 1,56 | down |
| 6441351 | 7031774 | 964752  | --- | --- | --- | 1,11 | down |
| 6441424 | 7238199 | 1468930 | --- | --- | --- | 1,35 | up   |
| 6441549 | 7240569 | 1475322 | --- | --- | --- | 1,12 | down |
| 6441551 | 7249503 | 1496228 | --- | --- | --- | 1,16 | down |
| 6441744 | 7261668 | 1526982 | --- | --- | --- | 1,65 | up   |
| 6441772 | 7341002 | 1722547 | --- | --- | --- | 1,30 | up   |
| 6441777 | 7356027 | 1759982 | --- | --- | --- | 1,03 | up   |
| 6441834 | 7263401 | 1530979 | --- | --- | --- | 1,07 | up   |
| 6441945 | 7040260 | 986088  | --- | --- | --- | 1,33 | down |
| 6441949 | 7120379 | 1178329 | --- | --- | --- | 1,09 | down |
| 6441986 | 7170764 | 1301438 | --- | --- | --- | 1,01 | down |
| 6442029 | 7334331 | 1705687 | --- | --- | --- | 1,06 | up   |
| 6442467 | 7226241 | 1437772 | --- | --- | --- | 1,34 | down |
| 6442549 | 7079600 | 1078630 | --- | --- | --- | 2,62 | up   |
| 6442675 | 7243647 | 1482442 | --- | --- | --- | 1,40 | down |
| 6442680 | 7236254 | 1464074 | --- | --- | --- | 1,02 | up   |
| 6442747 | 7148978 | 1248547 | --- | --- | --- | 1,21 | down |
| 6442791 | 7319937 | 1672272 | --- | --- | --- | 1,01 | down |
| 6442856 | 7267802 | 1541907 | --- | --- | --- | 1,05 | down |
| 6442921 | 7293234 | 1604348 | --- | --- | --- | 1,12 | up   |
| 6442972 | 7285688 | 1586194 | --- | --- | --- | 1,05 | up   |
| 6443076 | 7240569 | 1475402 | --- | --- | --- | 1,13 | up   |
| 6443378 | 7159027 | 1272731 | --- | --- | --- | 1,22 | down |
| 6443459 | 7285061 | 1585142 | --- | --- | --- | 1,05 | up   |
| 6443539 | 7365093 | 1781621 | --- | --- | --- | 1,01 | up   |
| 6443545 | 7350993 | 1747547 | --- | --- | --- | 1,20 | up   |
| 6443782 | 7115880 | 1166840 | --- | --- | --- | 1,49 | up   |
| 6443792 | 7313905 | 1656846 | --- | --- | --- | 2,07 | down |
| 6443885 | 7048382 | 1006348 | --- | --- | --- | 2,80 | up   |
| 6443970 | 7301879 | 1626622 | --- | --- | --- | 1,03 | up   |
| 6444019 | 7130889 | 1203867 | --- | --- | --- | 1,08 | up   |
| 6444054 | 7146982 | 1243277 | --- | --- | --- | 1,23 | down |
| 6444109 | 7248790 | 1494526 | --- | --- | --- | 1,01 | up   |
| 6444246 | 7370412 | 1796828 | --- | --- | --- | 1,21 | down |
| 6444344 | 7341397 | 1723630 | --- | --- | --- | 1,05 | down |
| 6444481 | 7113483 | 1161006 | --- | --- | --- | 1,72 | up   |
| 6444541 | 7376566 | 1812887 | --- | --- | --- | 1,02 | down |
| 6444862 | 7290942 | 1599132 | --- | --- | --- | 1,60 | down |
| 6444888 | 7249917 | 1497393 | --- | --- | --- | 1,34 | up   |
| 6445024 | 7170764 | 1301440 | --- | --- | --- | 1,17 | up   |
| 6445025 | 7193056 | 1358289 | --- | --- | --- | 1,23 | up   |

|         |         |         |     |     |     |      |      |
|---------|---------|---------|-----|-----|-----|------|------|
| 6445042 | 7337224 | 1712628 | --- | --- | --- | 1,25 | down |
| 6445110 | 7031774 | 964736  | --- | --- | --- | 1,17 | up   |
| 6445119 | 7059375 | 1030060 | --- | --- | --- | 1,25 | up   |
| 6445168 | 7111066 | 1154956 | --- | --- | --- | 1,04 | up   |
| 6445206 | 7323522 | 1679832 | --- | --- | --- | 1,70 | down |
| 6445233 | 7289382 | 1595200 | --- | --- | --- | 1,08 | down |
| 6445238 | 7108551 | 1148696 | --- | --- | --- | 1,18 | down |
| 6445372 | 7087805 | 1097498 | --- | --- | --- | 1,15 | down |
| 6445378 | 7280743 | 1574512 | --- | --- | --- | 1,39 | down |
| 6445453 | 7255755 | 1511912 | --- | --- | --- | 1,35 | up   |
| 6445495 | 7061367 | 1034848 | --- | --- | --- | 1,13 | down |
| 6445541 | 7301879 | 1626619 | --- | --- | --- | 1,12 | down |
| 6445546 | 7052813 | 1015899 | --- | --- | --- | 1,54 | up   |
| 6445687 | 7261668 | 1526982 | --- | --- | --- | 2,04 | up   |
| 6445802 | 7240206 | 1474359 | --- | --- | --- | 1,15 | down |
| 6445928 | 7207069 | 1392035 | --- | --- | --- | 1,06 | up   |
| 6445971 | 7293402 | 1604806 | --- | --- | --- | 1,09 | up   |
| 6446096 | 7052331 | 1014567 | --- | --- | --- | 1,18 | down |
| 6446133 | 7154655 | 1262319 | --- | --- | --- | 1,23 | up   |
| 6446321 | 7236395 | 1464354 | --- | --- | --- | 1,14 | down |
| 6446502 | 7211343 | 1401970 | --- | --- | --- | 1,09 | up   |
| 6446560 | 7263152 | 1530367 | --- | --- | --- | 1,05 | up   |
| 6446569 | 7150348 | 1251434 | --- | --- | --- | 1,50 | down |
| 6446572 | 7226241 | 1437809 | --- | --- | --- | 1,05 | down |
| 6446612 | 7213908 | 1407698 | --- | --- | --- | 1,00 | up   |
| 6446698 | 7243653 | 1482543 | --- | --- | --- | 1,67 | down |
| 6446722 | 7068259 | 1051646 | --- | --- | --- | 1,30 | up   |
| 6446726 | 7368986 | 1792860 | --- | --- | --- | 1,46 | up   |
| 6446792 | 7358859 | 1766990 | --- | --- | --- | 1,01 | down |
| 6446837 | 7248790 | 1494517 | --- | --- | --- | 1,12 | up   |
| 6446842 | 7058713 | 1028667 | --- | --- | --- | 2,14 | down |
| 6446915 | 7350237 | 1745482 | --- | --- | --- | 1,00 | down |
| 6446989 | 7239752 | 1473191 | --- | --- | --- | 1,18 | down |
| 6447052 | 7083030 | 1086256 | --- | --- | --- | 1,10 | down |
| 6447114 | 7263652 | 1531625 | --- | --- | --- | 1,04 | up   |
| 6447252 | 7086522 | 1093955 | --- | --- | --- | 1,71 | down |
| 6447285 | 7333462 | 1703648 | --- | --- | --- | 1,34 | up   |
| 6447352 | 7344702 | 1732143 | --- | --- | --- | 1,07 | up   |
| 6447407 | 7329341 | 1693876 | --- | --- | --- | 1,07 | down |
| 6447479 | 7384509 | 1830735 | --- | --- | --- | 1,03 | down |
| 6447481 | 7114108 | 1162456 | --- | --- | --- | 1,03 | up   |
| 6447525 | 7327169 | 1688462 | --- | --- | --- | 1,01 | down |
| 6447526 | 7297274 | 1614611 | --- | --- | --- | 1,12 | up   |
| 6447587 | 7034293 | 971986  | --- | --- | --- | 1,01 | up   |
| 6447636 | 7178662 | 1321648 | --- | --- | --- | 1,04 | up   |
| 6447670 | 7238115 | 1468568 | --- | --- | --- | 1,09 | down |
| 6447699 | 7329135 | 1693488 | --- | --- | --- | 1,34 | down |
| 6447803 | 7217650 | 1417193 | --- | --- | --- | 1,47 | down |
| 6447868 | 7233440 | 1456859 | --- | --- | --- | 1,02 | down |
| 6447870 | 7075445 | 1069342 | --- | --- | --- | 1,56 | down |
| 6447894 | 7189574 | 1348701 | --- | --- | --- | 1,07 | up   |
| 6447932 | 7192696 | 1357182 | --- | --- | --- | 1,00 | up   |
| 6448187 | 7038971 | 982983  | --- | --- | --- | 2,26 | down |
| 6448281 | 7290288 | 1597342 | --- | --- | --- | 1,12 | down |
| 6448304 | 7029770 | 960158  | --- | --- | --- | 1,55 | down |
| 6448307 | 7125348 | 1190075 | --- | --- | --- | 1,12 | down |



|         |         |         |     |     |     |      |      |
|---------|---------|---------|-----|-----|-----|------|------|
| 6448308 | 7337260 | 1712800 | --- | --- | --- | 1,28 | down |
| 6448330 | 7080106 | 1079750 | --- | --- | --- | 1,59 | down |
| 6448399 | 7092965 | 1110197 | --- | --- | --- | 1,27 | down |
| 6448414 | 7341397 | 1723640 | --- | --- | --- | 1,11 | down |
| 6448480 | 7133181 | 1209151 | --- | --- | --- | 1,08 | down |
| 6448489 | 7062436 | 1037721 | --- | --- | --- | 1,43 | down |
| 6448510 | 7031774 | 964725  | --- | --- | --- | 1,17 | up   |
| 6448576 | 7087282 | 1096196 | --- | --- | --- | 1,03 | down |
| 6448604 | 7076236 | 1071200 | --- | --- | --- | 1,16 | up   |
| 6448840 | 7226241 | 1437772 | --- | --- | --- | 1,09 | down |
| 6448912 | 7167507 | 1293114 | --- | --- | --- | 1,47 | up   |
| 6448913 | 7378997 | 1818658 | --- | --- | --- | 1,08 | down |
| 6449258 | 7103782 | 1136948 | --- | --- | --- | 1,33 | up   |
| 6449338 | 7159177 | 1273338 | --- | --- | --- | 1,01 | down |
| 6449444 | 7346066 | 1735287 | --- | --- | --- | 1,02 | up   |
| 6449485 | 7339110 | 1717614 | --- | --- | --- | 1,08 | down |
| 6449532 | 7380497 | 1821841 | --- | --- | --- | 1,30 | up   |
| 6449576 | 7064468 | 1042372 | --- | --- | --- | 1,03 | down |
| 6449584 | 7303616 | 1631369 | --- | --- | --- | 1,06 | down |
| 6449644 | 7217650 | 1417195 | --- | --- | --- | 1,13 | up   |
| 6449654 | 7319937 | 1672277 | --- | --- | --- | 1,02 | down |
| 6449671 | 7096859 | 1119322 | --- | --- | --- | 1,07 | up   |
| 6449678 | 7047865 | 1005352 | --- | --- | --- | 1,06 | down |
| 6450033 | 7039265 | 983658  | --- | --- | --- | 1,67 | up   |
| 6450066 | 7076160 | 1070963 | --- | --- | --- | 1,07 | down |
| 6450094 | 7232340 | 1453527 | --- | --- | --- | 1,22 | up   |
| 6450098 | 7344838 | 1732419 | --- | --- | --- | 1,41 | down |
| 6450194 | 7239939 | 1473784 | --- | --- | --- | 1,13 | down |
| 6450200 | 7196029 | 1365611 | --- | --- | --- | 1,46 | down |
| 6450256 | 7108345 | 1148085 | --- | --- | --- | 1,22 | down |
| 6450320 | 7240569 | 1475365 | --- | --- | --- | 4,99 | down |
| 6450394 | 7029770 | 960158  | --- | --- | --- | 2,51 | down |
| 6450491 | 7041609 | 989569  | --- | --- | --- | 1,04 | down |
| 6450499 | 7363576 | 1778194 | --- | --- | --- | 1,03 | down |
| 6450510 | 7233440 | 1456846 | --- | --- | --- | 1,05 | up   |
| 6450546 | 7083965 | 1088219 | --- | --- | --- | 1,16 | up   |
| 6450649 | 7224166 | 1432685 | --- | --- | --- | 2,05 | up   |
| 6450749 | 7302786 | 1628863 | --- | --- | --- | 1,00 | up   |
| 6450867 | 7070836 | 1058335 | --- | --- | --- | 1,23 | down |
| 6450942 | 7186688 | 1341843 | --- | --- | --- | 1,20 | down |
| 6450949 | 7133612 | 1210249 | --- | --- | --- | 1,02 | up   |
| 6450967 | 7059375 | 1030058 | --- | --- | --- | 2,03 | down |
| 6451151 | 7082098 | 1084112 | --- | --- | --- | 1,10 | down |
| 6451166 | 7069464 | 1054663 | --- | --- | --- | 1,07 | down |
| 6451327 | 7301900 | 1626743 | --- | --- | --- | 1,18 | up   |
| 6451367 | 7333462 | 1703639 | --- | --- | --- | 1,30 | down |
| 6451453 | 7082098 | 1084114 | --- | --- | --- | 1,10 | down |
| 6451469 | 7068853 | 1053095 | --- | --- | --- | 1,05 | up   |
| 6451535 | 7120039 | 1177548 | --- | --- | --- | 1,09 | up   |
| 6451638 | 7217747 | 1417494 | --- | --- | --- | 1,38 | up   |
| 6451649 | 7156372 | 1266713 | --- | --- | --- | 1,03 | down |
| 6451718 | 7112562 | 1158607 | --- | --- | --- | 1,04 | down |
| 6451860 | 7240224 | 1474395 | --- | --- | --- | 4,92 | up   |
| 6451991 | 7255522 | 1511410 | --- | --- | --- | 1,02 | down |
| 6451999 | 7236358 | 1464237 | --- | --- | --- | 1,13 | up   |
| 6452015 | 7358859 | 1766996 | --- | --- | --- | 1,19 | down |

|         |         |         |     |     |     |      |      |
|---------|---------|---------|-----|-----|-----|------|------|
| 6452033 | 7337224 | 1712615 | --- | --- | --- | 1,09 | down |
| 6452140 | 7331434 | 1699207 | --- | --- | --- | 2,15 | up   |
| 6452149 | 7364346 | 1780012 | --- | --- | --- | 1,19 | down |
| 6452215 | 7280743 | 1574531 | --- | --- | --- | 1,34 | down |
| 6452249 | 7350237 | 1745487 | --- | --- | --- | 1,28 | up   |
| 6452355 | 7340838 | 1722060 | --- | --- | --- | 1,05 | down |
| 6452418 | 7329135 | 1693486 | --- | --- | --- | 1,05 | up   |
| 6452453 | 7196029 | 1365642 | --- | --- | --- | 1,31 | up   |
| 6452490 | 7112566 | 1158635 | --- | --- | --- | 2,33 | down |
| 6452509 | 7049399 | 1008366 | --- | --- | --- | 1,13 | down |
| 6452558 | 7231203 | 1450433 | --- | --- | --- | 1,02 | up   |
| 6452617 | 7332059 | 1700734 | --- | --- | --- | 1,16 | down |
| 6452640 | 7213908 | 1407664 | --- | --- | --- | 1,17 | down |
| 6452925 | 7340757 | 1721891 | --- | --- | --- | 1,92 | up   |
| 6453118 | 7127257 | 1194813 | --- | --- | --- | 1,38 | up   |
| 6453171 | 7108551 | 1148711 | --- | --- | --- | 1,08 | down |
| 6453312 | 7132020 | 1206317 | --- | --- | --- | 1,55 | down |
| 6453338 | 7264797 | 1534422 | --- | --- | --- | 1,06 | down |
| 6453479 | 7247334 | 1490820 | --- | --- | --- | 1,39 | down |
| 6453489 | 7232340 | 1453523 | --- | --- | --- | 1,08 | down |
| 6453603 | 7337224 | 1712601 | --- | --- | --- | 2,78 | down |
| 6453606 | 7341646 | 1724211 | --- | --- | --- | 1,05 | up   |
| 6453662 | 7059766 | 1030972 | --- | --- | --- | 1,07 | down |
| 6453684 | 7243363 | 1481603 | --- | --- | --- | 1,13 | down |
| 6453785 | 7274892 | 1559560 | --- | --- | --- | 1,09 | up   |
| 6453800 | 7294866 | 1608381 | --- | --- | --- | 2,78 | down |
| 6453808 | 7159642 | 1274201 | --- | --- | --- | 1,24 | down |
| 6453852 | 7186440 | 1341255 | --- | --- | --- | 1,43 | up   |
| 6453858 | 7033672 | 970370  | --- | --- | --- | 1,62 | down |
| 6454048 | 7236492 | 1464544 | --- | --- | --- | 1,07 | up   |
| 6454101 | 7350993 | 1747525 | --- | --- | --- | 1,40 | up   |
| 6454112 | 7240206 | 1474360 | --- | --- | --- | 1,07 | down |
| 6454177 | 7037764 | 980094  | --- | --- | --- | 1,11 | down |
| 6454196 | 7232029 | 1452788 | --- | --- | --- | 1,14 | down |
| 6454287 | 7206133 | 1389963 | --- | --- | --- | 1,09 | down |
| 6454309 | 7075424 | 1069290 | --- | --- | --- | 1,21 | up   |
| 6454373 | 7193056 | 1358256 | --- | --- | --- | 1,09 | down |
| 6454505 | 7070836 | 1058338 | --- | --- | --- | 1,18 | up   |
| 6454549 | 7240569 | 1475446 | --- | --- | --- | 1,01 | up   |
| 6454586 | 7147809 | 1245465 | --- | --- | --- | 1,33 | down |
| 6454621 | 7225634 | 1436217 | --- | --- | --- | 1,23 | down |
| 6454626 | 7096859 | 1119302 | --- | --- | --- | 1,08 | up   |
| 6454745 | 7279533 | 1571917 | --- | --- | --- | 2,06 | down |
| 6454758 | 7040260 | 986042  | --- | --- | --- | 1,66 | down |
| 6454795 | 7067828 | 1050788 | --- | --- | --- | 1,04 | up   |
| 6454851 | 7344702 | 1732145 | --- | --- | --- | 1,34 | up   |
| 6454872 | 7293757 | 1605683 | --- | --- | --- | 1,24 | down |
| 6454902 | 7357815 | 1764152 | --- | --- | --- | 1,17 | up   |
| 6454942 | 7249503 | 1496219 | --- | --- | --- | 1,34 | down |
| 6455097 | 7102510 | 1133875 | --- | --- | --- | 1,19 | down |
| 6455436 | 7378997 | 1818670 | --- | --- | --- | 1,21 | down |
| 6455464 | 7058713 | 1028664 | --- | --- | --- | 1,36 | up   |
| 6455510 | 7098451 | 1123809 | --- | --- | --- | 1,45 | up   |
| 6455626 | 7088625 | 1099863 | --- | --- | --- | 1,12 | down |
| 6455791 | 7368684 | 1791857 | --- | --- | --- | 1,19 | up   |
| 6455878 | 7111244 | 1155385 | --- | --- | --- | 1,08 | up   |

|         |         |         |     |     |     |      |      |
|---------|---------|---------|-----|-----|-----|------|------|
| 6455883 | 7330659 | 1697058 | --- | --- | --- | 1,13 | down |
| 6455891 | 7086966 | 1095284 | --- | --- | --- | 1,34 | down |
| 6455907 | 7230886 | 1449577 | --- | --- | --- | 1,07 | down |
| 6455928 | 7086664 | 1094263 | --- | --- | --- | 1,30 | down |
| 6456250 | 7245066 | 1485570 | --- | --- | --- | 1,05 | down |
| 6456279 | 7062436 | 1037715 | --- | --- | --- | 2,11 | up   |
| 6456328 | 7070140 | 1056480 | --- | --- | --- | 1,08 | down |
| 6456367 | 7319144 | 1670094 | --- | --- | --- | 1,26 | down |
| 6456397 | 7364346 | 1780034 | --- | --- | --- | 1,61 | up   |
| 6456467 | 7034486 | 972505  | --- | --- | --- | 1,15 | up   |
| 6456616 | 7107926 | 1146825 | --- | --- | --- | 1,27 | up   |
| 6456694 | 7064134 | 1041477 | --- | --- | --- | 1,46 | up   |
| 6456697 | 7333462 | 1703648 | --- | --- | --- | 1,08 | down |
| 6456780 | 7356027 | 1759985 | --- | --- | --- | 1,11 | down |
| 6456842 | 7292154 | 1601647 | --- | --- | --- | 2,31 | up   |
| 6456843 | 7234040 | 1458499 | --- | --- | --- | 1,37 | up   |
| 6457004 | 7041584 | 989456  | --- | --- | --- | 1,52 | up   |
| 6457080 | 7339286 | 1718108 | --- | --- | --- | 1,26 | up   |
| 6457173 | 7217650 | 1417202 | --- | --- | --- | 1,18 | up   |
| 6457201 | 7062436 | 1037658 | --- | --- | --- | 1,01 | down |
| 6457255 | 7032444 | 966746  | --- | --- | --- | 2,39 | down |
| 6457256 | 7171047 | 1302370 | --- | --- | --- | 1,14 | up   |
| 6457314 | 7330238 | 1695955 | --- | --- | --- | 1,02 | up   |
| 6457339 | 7284934 | 1584915 | --- | --- | --- | 2,46 | up   |
| 6457470 | 7279073 | 1570710 | --- | --- | --- | 1,04 | up   |
| 6457521 | 7336931 | 1711872 | --- | --- | --- | 1,22 | up   |
| 6457644 | 7267380 | 1540429 | --- | --- | --- | 1,07 | down |
| 6457745 | 7272824 | 1554963 | --- | --- | --- | 1,07 | down |
| 6457791 | 7034756 | 973222  | --- | --- | --- | 1,09 | up   |
| 6457813 | 7267802 | 1541838 | --- | --- | --- | 1,24 | up   |
| 6457820 | 7038153 | 981159  | --- | --- | --- | 1,03 | up   |
| 6457827 | 7244288 | 1484119 | --- | --- | --- | 1,28 | down |
| 6457847 | 7099573 | 1126735 | --- | --- | --- | 1,05 | down |
| 6457905 | 7211389 | 1402113 | --- | --- | --- | 1,25 | down |
| 6457963 | 7295410 | 1609794 | --- | --- | --- | 1,17 | down |
| 6458148 | 7340990 | 1722517 | --- | --- | --- | 2,32 | down |
| 6458212 | 7156763 | 1267754 | --- | --- | --- | 1,12 | up   |
| 6458235 | 7361420 | 1773050 | --- | --- | --- | 1,29 | up   |
| 6458257 | 7303616 | 1631394 | --- | --- | --- | 1,26 | up   |
| 6458386 | 7237719 | 1467480 | --- | --- | --- | 1,13 | down |
| 6458394 | 7263152 | 1530354 | --- | --- | --- | 1,46 | up   |
| 6458506 | 7174149 | 1310507 | --- | --- | --- | 1,02 | down |
| 6458568 | 7238202 | 1468948 | --- | --- | --- | 1,13 | up   |
| 6458597 | 7203872 | 1384769 | --- | --- | --- | 1,10 | down |
| 6458676 | 7337224 | 1712563 | --- | --- | --- | 1,33 | up   |
| 6458719 | 7213908 | 1407757 | --- | --- | --- | 1,27 | down |
| 6458721 | 7377583 | 1815461 | --- | --- | --- | 1,55 | up   |
| 6458722 | 7068259 | 1051593 | --- | --- | --- | 1,65 | up   |
| 6458868 | 7363765 | 1778589 | --- | --- | --- | 1,00 | up   |
| 6459049 | 7120195 | 1177874 | --- | --- | --- | 2,70 | down |
| 6459129 | 7333462 | 1703637 | --- | --- | --- | 1,01 | down |
| 6459134 | 7316644 | 1664023 | --- | --- | --- | 1,31 | up   |
| 6459191 | 7321029 | 1674804 | --- | --- | --- | 1,18 | down |
| 6459195 | 7101258 | 1130569 | --- | --- | --- | 1,11 | down |
| 6459223 | 7101258 | 1130565 | --- | --- | --- | 1,17 | down |
| 6459235 | 7243130 | 1480868 | --- | --- | --- | 1,21 | down |

|         |         |         |     |     |     |      |      |
|---------|---------|---------|-----|-----|-----|------|------|
| 6459280 | 7286807 | 1588795 | --- | --- | --- | 1,14 | down |
| 6459382 | 7179785 | 1324460 | --- | --- | --- | 1,53 | down |
| 6459410 | 7237719 | 1467484 | --- | --- | --- | 1,15 | up   |
| 6459417 | 7339732 | 1719212 | --- | --- | --- | 1,10 | down |
| 6459465 | 7132125 | 1206610 | --- | --- | --- | 1,00 | up   |
| 6459472 | 7113483 | 1161014 | --- | --- | --- | 1,08 | down |
| 6459531 | 7350993 | 1747524 | --- | --- | --- | 1,22 | up   |
| 6459733 | 7112225 | 1157619 | --- | --- | --- | 1,17 | down |
| 6459736 | 7033672 | 970352  | --- | --- | --- | 1,17 | up   |
| 6459816 | 7349643 | 1744147 | --- | --- | --- | 1,10 | up   |
| 6459919 | 7141061 | 1228677 | --- | --- | --- | 1,21 | down |
| 6459978 | 7240665 | 1475834 | --- | --- | --- | 1,09 | up   |
| 6460031 | 7236987 | 1465729 | --- | --- | --- | 1,18 | up   |
| 6460040 | 7037806 | 980204  | --- | --- | --- | 2,05 | up   |
| 6460042 | 7380497 | 1821824 | --- | --- | --- | 1,41 | down |
| 6460180 | 7258546 | 1518930 | --- | --- | --- | 1,16 | down |
| 6460452 | 7364346 | 1779987 | --- | --- | --- | 1,07 | down |
| 6460521 | 7297589 | 1615660 | --- | --- | --- | 2,53 | down |
| 6460612 | 7037764 | 979997  | --- | --- | --- | 1,27 | up   |
| 6460714 | 7053874 | 1018307 | --- | --- | --- | 1,15 | up   |
| 6461078 | 7177180 | 1317765 | --- | --- | --- | 1,14 | down |
| 6461127 | 7088164 | 1098475 | --- | --- | --- | 1,40 | up   |
| 6461190 | 7103337 | 1135977 | --- | --- | --- | 2,04 | down |
| 6461234 | 7330238 | 1695929 | --- | --- | --- | 1,04 | up   |
| 6461256 | 7276231 | 1563116 | --- | --- | --- | 1,01 | up   |
| 6461321 | 7196029 | 1365624 | --- | --- | --- | 1,09 | up   |
| 6461392 | 7299512 | 1620544 | --- | --- | --- | 1,23 | up   |
| 6461424 | 7147809 | 1245447 | --- | --- | --- | 1,22 | up   |
| 6461606 | 7075096 | 1068601 | --- | --- | --- | 1,07 | up   |
| 6461905 | 7378997 | 1818663 | --- | --- | --- | 1,09 | down |
| 6461944 | 7247229 | 1490556 | --- | --- | --- | 1,18 | up   |
| 6461976 | 7236395 | 1464344 | --- | --- | --- | 1,02 | up   |
| 6462008 | 7373417 | 1805106 | --- | --- | --- | 1,11 | down |
| 6462027 | 7072765 | 1062738 | --- | --- | --- | 1,04 | down |
| 6462096 | 7037764 | 979991  | --- | --- | --- | 1,14 | down |
| 6462143 | 7373417 | 1805109 | --- | --- | --- | 1,34 | up   |
| 6462158 | 7296860 | 1613436 | --- | --- | --- | 7,88 | down |
| 6462162 | 7378981 | 1818537 | --- | --- | --- | 1,19 | down |
| 6462199 | 7217269 | 1415915 | --- | --- | --- | 1,05 | down |
| 6462232 | 7040260 | 986055  | --- | --- | --- | 1,15 | down |
| 6462248 | 7342356 | 1725873 | --- | --- | --- | 1,00 | down |
| 6462279 | 7243647 | 1482427 | --- | --- | --- | 1,43 | up   |
| 6462362 | 7350489 | 1746112 | --- | --- | --- | 1,27 | up   |
| 6462522 | 7240206 | 1474349 | --- | --- | --- | 2,02 | up   |
| 6462618 | 7243363 | 1481629 | --- | --- | --- | 1,30 | up   |
| 6462632 | 7238115 | 1468591 | --- | --- | --- | 1,57 | down |
| 6462726 | 7120827 | 1179350 | --- | --- | --- | 1,22 | down |
| 6462841 | 7266838 | 1539000 | --- | --- | --- | 1,23 | up   |
| 6462907 | 7097680 | 1121731 | --- | --- | --- | 1,09 | down |
| 6462938 | 7200996 | 1378163 | --- | --- | --- | 1,39 | up   |
| 6462968 | 7325674 | 1685231 | --- | --- | --- | 1,95 | up   |
| 6463067 | 7238202 | 1468937 | --- | --- | --- | 1,19 | up   |
| 6463299 | 7330396 | 1696353 | --- | --- | --- | 1,39 | up   |
| 6463487 | 7336835 | 1711590 | --- | --- | --- | 2,65 | down |
| 6463495 | 7254040 | 1507596 | --- | --- | --- | 1,20 | up   |
| 6463531 | 7038153 | 981160  | --- | --- | --- | 1,26 | down |

|         |         |         |     |     |     |      |      |
|---------|---------|---------|-----|-----|-----|------|------|
| 6463562 | 7182713 | 1332533 | --- | --- | --- | 1,10 | down |
| 6463608 | 7240569 | 1475495 | --- | --- | --- | 1,06 | up   |
| 6463874 | 7096924 | 1119603 | --- | --- | --- | 1,38 | up   |
| 6463878 | 7180732 | 1326734 | --- | --- | --- | 1,01 | up   |
| 6463893 | 7253408 | 1505953 | --- | --- | --- | 1,17 | up   |
| 6464104 | 7359551 | 1768626 | --- | --- | --- | 1,03 | up   |
| 6464286 | 7025652 | 950297  | --- | --- | --- | 1,11 | up   |
| 6464377 | 7108551 | 1148711 | --- | --- | --- | 1,15 | down |
| 6464532 | 7210263 | 1399754 | --- | --- | --- | 1,02 | up   |
| 6464563 | 7075424 | 1069283 | --- | --- | --- | 1,42 | up   |
| 6464566 | 7318143 | 1668094 | --- | --- | --- | 1,89 | down |
| 6464616 | 7098867 | 1124947 | --- | --- | --- | 1,55 | down |
| 6464673 | 7331434 | 1699217 | --- | --- | --- | 1,37 | down |
| 6464728 | 7039223 | 983556  | --- | --- | --- | 1,57 | down |
| 6464782 | 7041609 | 989576  | --- | --- | --- | 1,34 | up   |
| 6464814 | 7068259 | 1051660 | --- | --- | --- | 1,11 | down |
| 6464832 | 7384509 | 1830751 | --- | --- | --- | 1,54 | up   |
| 6465148 | 7070616 | 1057776 | --- | --- | --- | 1,18 | up   |
| 6465216 | 7273744 | 1557043 | --- | --- | --- | 1,16 | up   |
| 6465289 | 7337845 | 1714344 | --- | --- | --- | 1,36 | up   |
| 6465356 | 7316644 | 1664013 | --- | --- | --- | 2,07 | up   |
| 6465357 | 7071969 | 1060899 | --- | --- | --- | 1,03 | down |
| 6465397 | 7144135 | 1236326 | --- | --- | --- | 1,59 | up   |
| 6465427 | 7087805 | 1097468 | --- | --- | --- | 1,15 | down |
| 6465439 | 7193056 | 1358268 | --- | --- | --- | 1,05 | down |
| 6465463 | 7349946 | 1744956 | --- | --- | --- | 1,00 | up   |
| 6465553 | 7364346 | 1780015 | --- | --- | --- | 1,77 | down |
| 6465578 | 7249503 | 1496204 | --- | --- | --- | 1,27 | down |
| 6465652 | 7116614 | 1168781 | --- | --- | --- | 1,01 | down |
| 6465748 | 7364346 | 1779986 | --- | --- | --- | 1,20 | up   |
| 6465774 | 7149817 | 1250303 | --- | --- | --- | 1,20 | down |
| 6465779 | 7088489 | 1099515 | --- | --- | --- | 1,01 | up   |
| 6465849 | 7370475 | 1797133 | --- | --- | --- | 1,34 | up   |
| 6465872 | 7344702 | 1732138 | --- | --- | --- | 1,00 | up   |
| 6465933 | 7213908 | 1407666 | --- | --- | --- | 1,21 | up   |
| 6465976 | 7074132 | 1066324 | --- | --- | --- | 1,11 | down |
| 6466002 | 7297589 | 1615638 | --- | --- | --- | 1,16 | up   |
| 6466031 | 7307721 | 1642009 | --- | --- | --- | 1,07 | up   |
| 6466109 | 7156978 | 1268175 | --- | --- | --- | 1,09 | down |
| 6466111 | 7269314 | 1545626 | --- | --- | --- | 1,09 | up   |
| 6466142 | 7049399 | 1008417 | --- | --- | --- | 1,00 | up   |
| 6466222 | 7078326 | 1075894 | --- | --- | --- | 1,10 | up   |
| 6466783 | 7244290 | 1484161 | --- | --- | --- | 1,21 | down |
| 6466813 | 7374143 | 1807010 | --- | --- | --- | 1,18 | up   |
| 6466892 | 7119930 | 1177230 | --- | --- | --- | 1,93 | down |
| 6467010 | 7331297 | 1698805 | --- | --- | --- | 1,01 | up   |
| 6467098 | 7240569 | 1475510 | --- | --- | --- | 1,13 | up   |
| 6467162 | 7244288 | 1484104 | --- | --- | --- | 2,01 | up   |
| 6467240 | 7321029 | 1674830 | --- | --- | --- | 1,43 | up   |
| 6467501 | 7087805 | 1097472 | --- | --- | --- | 1,02 | down |
| 6467577 | 7119930 | 1177216 | --- | --- | --- | 1,03 | down |
| 6467586 | 7243603 | 1482272 | --- | --- | --- | 1,19 | down |
| 6467613 | 7367971 | 1789134 | --- | --- | --- | 1,17 | up   |
| 6467705 | 7142081 | 1230973 | --- | --- | --- | 1,19 | up   |
| 6468011 | 7241136 | 1476727 | --- | --- | --- | 1,10 | down |
| 6468092 | 7033672 | 970364  | --- | --- | --- | 1,13 | down |

|         |         |         |     |     |     |      |      |
|---------|---------|---------|-----|-----|-----|------|------|
| 6468150 | 7372840 | 1803782 | --- | --- | --- | 1,02 | down |
| 6468192 | 7344406 | 1731234 | --- | --- | --- | 1,16 | down |
| 6468229 | 7330238 | 1695938 | --- | --- | --- | 1,02 | up   |
| 6468375 | 7380452 | 1821678 | --- | --- | --- | 2,98 | down |
| 6468586 | 7210445 | 1400148 | --- | --- | --- | 1,08 | up   |
| 6468634 | 7036559 | 977245  | --- | --- | --- | 1,57 | up   |
| 6468699 | 7364948 | 1781222 | --- | --- | --- | 1,00 | down |
| 6468747 | 7384365 | 1830273 | --- | --- | --- | 1,21 | down |
| 6468822 | 7139709 | 1225072 | --- | --- | --- | 1,01 | down |
| 6468896 | 7217679 | 1417306 | --- | --- | --- | 1,67 | up   |
| 6468938 | 7213908 | 1407754 | --- | --- | --- | 1,04 | down |
| 6468956 | 7274780 | 1559238 | --- | --- | --- | 1,11 | down |
| 6469000 | 7239752 | 1473149 | --- | --- | --- | 2,32 | up   |
| 6469099 | 7217747 | 1417491 | --- | --- | --- | 1,54 | down |
| 6469115 | 7071264 | 1059285 | --- | --- | --- | 1,52 | up   |
| 6469187 | 7217747 | 1417480 | --- | --- | --- | 1,05 | up   |
| 6469264 | 7243130 | 1480881 | --- | --- | --- | 1,23 | down |
| 6469292 | 7097525 | 1121072 | --- | --- | --- | 1,25 | down |
| 6469355 | 7049399 | 1008336 | --- | --- | --- | 1,12 | down |
| 6469486 | 7100257 | 1128263 | --- | --- | --- | 1,16 | down |
| 6469540 | 7025652 | 950277  | --- | --- | --- | 1,02 | up   |
| 6469576 | 7025652 | 950313  | --- | --- | --- | 1,32 | up   |
| 6469579 | 7244602 | 1484776 | --- | --- | --- | 1,18 | down |
| 6469785 | 7340990 | 1722510 | --- | --- | --- | 1,96 | down |
| 6469797 | 7183182 | 1333579 | --- | --- | --- | 1,07 | up   |
| 6470028 | 7075082 | 1068518 | --- | --- | --- | 1,02 | down |
| 6470050 | 7249917 | 1497391 | --- | --- | --- | 1,43 | up   |
| 6470074 | 7243647 | 1482478 | --- | --- | --- | 1,20 | down |
| 6470083 | 7313411 | 1655439 | --- | --- | --- | 1,07 | up   |
| 6470097 | 7226241 | 1437796 | --- | --- | --- | 1,31 | up   |
| 6470105 | 7280743 | 1574510 | --- | --- | --- | 1,11 | down |
| 6470111 | 7358623 | 1766262 | --- | --- | --- | 1,11 | down |
| 6470239 | 7237719 | 1467510 | --- | --- | --- | 1,27 | up   |
| 6470307 | 7373633 | 1805699 | --- | --- | --- | 1,56 | down |
| 6470581 | 7198210 | 1370996 | --- | --- | --- | 1,06 | down |
| 6471035 | 7330078 | 1695470 | --- | --- | --- | 1,17 | down |
| 6471069 | 7095262 | 1115654 | --- | --- | --- | 1,17 | up   |
| 6471192 | 7330238 | 1695920 | --- | --- | --- | 1,09 | down |
| 6471208 | 7323545 | 1679979 | --- | --- | --- | 1,12 | down |
| 6471283 | 7186688 | 1341848 | --- | --- | --- | 1,23 | down |
| 6471297 | 7095262 | 1115635 | --- | --- | --- | 1,07 | up   |
| 6471402 | 7316644 | 1664021 | --- | --- | --- | 1,29 | down |
| 6471483 | 7267953 | 1542237 | --- | --- | --- | 1,54 | down |
| 6471545 | 7271128 | 1550312 | --- | --- | --- | 1,02 | up   |
| 6471560 | 7029078 | 958874  | --- | --- | --- | 1,96 | up   |
| 6471975 | 7356115 | 1760129 | --- | --- | --- | 1,72 | down |
| 6472009 | 7132263 | 1206887 | --- | --- | --- | 1,26 | down |
| 6472059 | 7238202 | 1468941 | --- | --- | --- | 1,15 | down |
| 6472203 | 7059375 | 1030085 | --- | --- | --- | 1,52 | up   |
| 6472214 | 7279533 | 1571916 | --- | --- | --- | 1,30 | down |
| 6472222 | 7162959 | 1282089 | --- | --- | --- | 1,53 | up   |
| 6472317 | 7341253 | 1723316 | --- | --- | --- | 1,01 | up   |
| 6472325 | 7069830 | 1055634 | --- | --- | --- | 1,12 | down |
| 6472328 | 7231835 | 1452276 | --- | --- | --- | 1,60 | down |
| 6472366 | 7243647 | 1482422 | --- | --- | --- | 1,10 | down |
| 6472503 | 7070836 | 1058324 | --- | --- | --- | 1,30 | down |

|         |         |         |     |     |     |      |      |
|---------|---------|---------|-----|-----|-----|------|------|
| 6472513 | 7332059 | 1700729 | --- | --- | --- | 1,06 | down |
| 6472885 | 7080731 | 1080969 | --- | --- | --- | 1,17 | up   |
| 6472937 | 7298008 | 1616677 | --- | --- | --- | 2,29 | down |
| 6473016 | 7162177 | 1280581 | --- | --- | --- | 1,37 | up   |
| 6473027 | 7098189 | 1123153 | --- | --- | --- | 1,75 | down |
| 6473083 | 7349944 | 1744923 | --- | --- | --- | 1,14 | up   |
| 6473086 | 7060851 | 1033396 | --- | --- | --- | 1,02 | down |
| 6473100 | 7286807 | 1588804 | --- | --- | --- | 1,26 | up   |
| 6473167 | 7092549 | 1109159 | --- | --- | --- | 1,03 | down |
| 6473175 | 7351951 | 1749836 | --- | --- | --- | 1,00 | down |
| 6473179 | 7371643 | 1800649 | --- | --- | --- | 1,24 | up   |
| 6473227 | 7226241 | 1437792 | --- | --- | --- | 1,06 | down |
| 6473241 | 7243647 | 1482448 | --- | --- | --- | 1,11 | down |
| 6473330 | 7142081 | 1230979 | --- | --- | --- | 1,36 | up   |
| 6473360 | 7385134 | 1831975 | --- | --- | --- | 1,31 | down |
| 6473446 | 7049399 | 1008369 | --- | --- | --- | 1,15 | up   |
| 6473461 | 7113483 | 1161012 | --- | --- | --- | 1,03 | up   |
| 6473498 | 7055876 | 1022486 | --- | --- | --- | 1,96 | down |
| 6473507 | 7344838 | 1732426 | --- | --- | --- | 1,29 | down |
| 6473517 | 7112566 | 1158636 | --- | --- | --- | 1,24 | up   |
| 6473547 | 7041609 | 989562  | --- | --- | --- | 1,06 | down |
| 6473799 | 7025652 | 950336  | --- | --- | --- | 1,03 | down |
| 6473804 | 7197056 | 1367844 | --- | --- | --- | 1,12 | up   |
| 6473830 | 7155116 | 1263432 | --- | --- | --- | 1,39 | up   |
| 6473836 | 7384365 | 1830281 | --- | --- | --- | 1,06 | up   |
| 6473873 | 7082098 | 1084112 | --- | --- | --- | 1,35 | up   |
| 6473878 | 7056304 | 1023626 | --- | --- | --- | 1,07 | up   |
| 6473981 | 7349882 | 1744787 | --- | --- | --- | 1,02 | up   |
| 6474111 | 7369400 | 1793984 | --- | --- | --- | 1,02 | down |
| 6474170 | 7335091 | 1707320 | --- | --- | --- | 1,34 | down |
| 6474185 | 7078666 | 1076536 | --- | --- | --- | 1,14 | down |
| 6474213 | 7374740 | 1808618 | --- | --- | --- | 1,05 | down |
| 6474217 | 7088489 | 1099525 | --- | --- | --- | 1,08 | up   |
| 6474253 | 7258323 | 1518471 | --- | --- | --- | 4,73 | down |
| 6474436 | 7210263 | 1399751 | --- | --- | --- | 1,31 | down |
| 6474466 | 7321029 | 1674832 | --- | --- | --- | 1,62 | up   |
| 6474471 | 7142770 | 1232734 | --- | --- | --- | 1,15 | down |
| 6474477 | 7299512 | 1620552 | --- | --- | --- | 1,03 | down |
| 6474498 | 7354688 | 1756376 | --- | --- | --- | 2,11 | up   |
| 6474635 | 7380019 | 1820826 | --- | --- | --- | 1,33 | up   |
| 6474664 | 7099573 | 1126719 | --- | --- | --- | 1,01 | up   |
| 6474691 | 7378546 | 1817601 | --- | --- | --- | 1,13 | down |
| 6474753 | 7154655 | 1262343 | --- | --- | --- | 1,09 | up   |
| 6474966 | 7070616 | 1057769 | --- | --- | --- | 1,34 | down |
| 6475084 | 7052567 | 1015259 | --- | --- | --- | 1,17 | down |
| 6475096 | 7069253 | 1054171 | --- | --- | --- | 1,40 | down |
| 6475118 | 7188138 | 1345027 | --- | --- | --- | 1,29 | up   |
| 6475128 | 7274780 | 1559210 | --- | --- | --- | 1,06 | up   |
| 6475223 | 7339379 | 1718337 | --- | --- | --- | 1,11 | down |
| 6475304 | 7229886 | 1447144 | --- | --- | --- | 1,24 | down |
| 6475349 | 7374143 | 1807010 | --- | --- | --- | 2,00 | up   |
| 6475373 | 7244288 | 1484128 | --- | --- | --- | 1,08 | down |
| 6475426 | 7243647 | 1482468 | --- | --- | --- | 1,34 | down |
| 6475563 | 7050167 | 1009823 | --- | --- | --- | 1,05 | down |
| 6475639 | 7236254 | 1464053 | --- | --- | --- | 1,92 | down |
| 6475794 | 7195903 | 1365329 | --- | --- | --- | 1,14 | down |

|         |         |         |     |     |     |      |      |
|---------|---------|---------|-----|-----|-----|------|------|
| 6475804 | 7161300 | 1278549 | --- | --- | --- | 1,12 | up   |
| 6475809 | 7156372 | 1266705 | --- | --- | --- | 3,40 | up   |
| 6476007 | 7146982 | 1243287 | --- | --- | --- | 1,04 | up   |
| 6476027 | 7139708 | 1225053 | --- | --- | --- | 1,16 | up   |
| 6476028 | 7327169 | 1688457 | --- | --- | --- | 1,48 | up   |
| 6476088 | 7359453 | 1768460 | --- | --- | --- | 1,53 | up   |
| 6476237 | 7050930 | 1011631 | --- | --- | --- | 1,21 | down |
| 6476281 | 7229856 | 1447074 | --- | --- | --- | 1,16 | down |
| 6476316 | 7361223 | 1772614 | --- | --- | --- | 1,28 | down |
| 6476344 | 7073950 | 1065920 | --- | --- | --- | 1,22 | down |
| 6476363 | 7033337 | 969492  | --- | --- | --- | 1,18 | up   |
| 6476392 | 7243647 | 1482466 | --- | --- | --- | 1,12 | down |
| 6476431 | 7036412 | 976872  | --- | --- | --- | 1,03 | down |
| 6476450 | 7267802 | 1541733 | --- | --- | --- | 1,33 | down |
| 6476527 | 7341397 | 1723638 | --- | --- | --- | 2,07 | up   |
| 6476559 | 7072332 | 1061644 | --- | --- | --- | 1,11 | up   |
| 6476571 | 7034756 | 973226  | --- | --- | --- | 1,60 | up   |
| 6476626 | 7330737 | 1697218 | --- | --- | --- | 1,21 | up   |
| 6476688 | 7277783 | 1567457 | --- | --- | --- | 1,30 | down |
| 6476726 | 7360486 | 1770966 | --- | --- | --- | 1,13 | up   |
| 6476755 | 7212735 | 1405002 | --- | --- | --- | 1,03 | up   |
| 6476783 | 7238252 | 1469221 | --- | --- | --- | 1,36 | up   |
| 6476785 | 7061550 | 1035289 | --- | --- | --- | 1,49 | down |
| 6476793 | 7067828 | 1050787 | --- | --- | --- | 1,08 | down |
| 6476917 | 7331829 | 1700179 | --- | --- | --- | 1,09 | up   |
| 6477187 | 7350237 | 1745488 | --- | --- | --- | 1,02 | up   |
| 6477193 | 7374143 | 1807010 | --- | --- | --- | 1,14 | up   |
| 6477244 | 7222221 | 1428061 | --- | --- | --- | 1,24 | up   |
| 6477251 | 7243647 | 1482419 | --- | --- | --- | 2,81 | down |
| 6477348 | 7255663 | 1511714 | --- | --- | --- | 1,20 | up   |
| 6477390 | 7217679 | 1417320 | --- | --- | --- | 1,05 | up   |
| 6477512 | 7098126 | 1122969 | --- | --- | --- | 1,05 | up   |
| 6477521 | 7342959 | 1727337 | --- | --- | --- | 1,37 | up   |
| 6477569 | 7350237 | 1745480 | --- | --- | --- | 1,04 | down |
| 6477638 | 7340304 | 1720841 | --- | --- | --- | 1,24 | up   |
| 6477784 | 7034293 | 971993  | --- | --- | --- | 1,11 | down |
| 6477810 | 7076972 | 1073185 | --- | --- | --- | 1,19 | up   |
| 6477820 | 7231203 | 1450420 | --- | --- | --- | 1,31 | up   |
| 6477837 | 7330238 | 1695950 | --- | --- | --- | 1,29 | down |
| 6477842 | 7199476 | 1374529 | --- | --- | --- | 1,10 | down |
| 6477975 | 7056333 | 1023669 | --- | --- | --- | 1,40 | up   |
| 6477998 | 7068259 | 1051649 | --- | --- | --- | 1,95 | down |
| 6478151 | 7210713 | 1400753 | --- | --- | --- | 1,42 | down |
| 6478209 | 7243653 | 1482541 | --- | --- | --- | 1,27 | down |
| 6478224 | 7217747 | 1417494 | --- | --- | --- | 1,17 | down |
| 6478377 | 7264797 | 1534422 | --- | --- | --- | 1,14 | down |
| 6478483 | 7197056 | 1367837 | --- | --- | --- | 1,39 | up   |
| 6478520 | 7037495 | 979334  | --- | --- | --- | 1,02 | down |
| 6478578 | 7314270 | 1657751 | --- | --- | --- | 1,03 | up   |
| 6478896 | 7111573 | 1156025 | --- | --- | --- | 1,12 | down |
| 6479020 | 7100257 | 1128242 | --- | --- | --- | 1,66 | up   |
| 6479045 | 7363568 | 1778139 | --- | --- | --- | 2,41 | up   |
| 6479074 | 7118356 | 1173203 | --- | --- | --- | 1,27 | up   |
| 6479077 | 7231835 | 1452293 | --- | --- | --- | 1,23 | down |
| 6479132 | 7148978 | 1248501 | --- | --- | --- | 1,03 | up   |
| 6479156 | 7308679 | 1644252 | --- | --- | --- | 1,50 | up   |



|         |         |         |     |     |     |      |      |
|---------|---------|---------|-----|-----|-----|------|------|
| 6479399 | 7132125 | 1206640 | --- | --- | --- | 1,03 | up   |
| 6479521 | 7384509 | 1830733 | --- | --- | --- | 1,11 | down |
| 6479561 | 7180732 | 1326727 | --- | --- | --- | 1,23 | up   |
| 6479665 | 7344836 | 1732409 | --- | --- | --- | 1,03 | up   |
| 6479700 | 7092549 | 1109187 | --- | --- | --- | 1,13 | up   |
| 6479772 | 7375727 | 1810881 | --- | --- | --- | 1,37 | down |
| 6479847 | 7371682 | 1800776 | --- | --- | --- | 1,22 | down |
| 6479857 | 7092549 | 1109165 | --- | --- | --- | 1,07 | up   |
| 6479917 | 7084193 | 1089048 | --- | --- | --- | 1,40 | up   |
| 6480126 | 7152038 | 1255397 | --- | --- | --- | 1,35 | down |
| 6480180 | 7203872 | 1384778 | --- | --- | --- | 1,01 | up   |
| 6480199 | 7160402 | 1276156 | --- | --- | --- | 1,06 | down |
| 6480269 | 7336931 | 1711872 | --- | --- | --- | 1,21 | up   |
| 6480389 | 7069253 | 1054168 | --- | --- | --- | 1,64 | up   |
| 6480416 | 7097525 | 1121072 | --- | --- | --- | 1,19 | up   |
| 6480458 | 7181105 | 1327967 | --- | --- | --- | 1,06 | down |
| 6480498 | 7263152 | 1530366 | --- | --- | --- | 1,12 | up   |
| 6480607 | 7217650 | 1417171 | --- | --- | --- | 1,10 | up   |
| 6480806 | 7189669 | 1348963 | --- | --- | --- | 1,41 | up   |
| 6480888 | 7279586 | 1572073 | --- | --- | --- | 1,08 | up   |
| 6480936 | 7311218 | 1650364 | --- | --- | --- | 1,13 | down |
| 6480989 | 7142081 | 1230987 | --- | --- | --- | 1,09 | up   |
| 6481052 | 7373906 | 1806370 | --- | --- | --- | 2,04 | down |
| 6481062 | 7189689 | 1349026 | --- | --- | --- | 1,14 | up   |
| 6481079 | 7172373 | 1305575 | --- | --- | --- | 1,59 | down |
| 6481150 | 7038530 | 981883  | --- | --- | --- | 2,21 | up   |
| 6481290 | 7337224 | 1712603 | --- | --- | --- | 1,40 | down |
| 6481309 | 7216994 | 1415185 | --- | --- | --- | 1,54 | down |
| 6481501 | 7058813 | 1028906 | --- | --- | --- | 1,36 | up   |
| 6481655 | 7289382 | 1595200 | --- | --- | --- | 1,74 | down |
| 6481684 | 7248964 | 1494938 | --- | --- | --- | 1,09 | up   |
| 6481688 | 7340757 | 1721895 | --- | --- | --- | 1,18 | down |
| 6481749 | 7037764 | 980093  | --- | --- | --- | 1,07 | down |
| 6481797 | 7315206 | 1660035 | --- | --- | --- | 1,24 | down |
| 6481810 | 7101258 | 1130570 | --- | --- | --- | 1,38 | down |
| 6481893 | 7092965 | 1110177 | --- | --- | --- | 1,04 | up   |
| 6481940 | 7097525 | 1121058 | --- | --- | --- | 1,09 | up   |
| 6481944 | 7231203 | 1450422 | --- | --- | --- | 1,22 | down |
| 6481977 | 7140113 | 1226055 | --- | --- | --- | 1,38 | down |
| 6482059 | 7338807 | 1716810 | --- | --- | --- | 1,09 | down |
| 6482094 | 7064224 | 1041773 | --- | --- | --- | 1,32 | down |
| 6482174 | 7033337 | 969501  | --- | --- | --- | 1,06 | up   |
| 6482237 | 7059020 | 1029357 | --- | --- | --- | 1,02 | down |
| 6482497 | 7039223 | 983562  | --- | --- | --- | 1,42 | down |
| 6482560 | 7333462 | 1703642 | --- | --- | --- | 1,48 | up   |
| 6482571 | 7061550 | 1035281 | --- | --- | --- | 1,39 | down |
| 6482705 | 7338807 | 1716811 | --- | --- | --- | 1,52 | down |
| 6482782 | 7065655 | 1045262 | --- | --- | --- | 1,19 | down |
| 6482857 | 7068853 | 1053096 | --- | --- | --- | 1,22 | up   |
| 6482893 | 7330396 | 1696352 | --- | --- | --- | 1,05 | down |
| 6482902 | 7084993 | 1090666 | --- | --- | --- | 1,05 | up   |
| 6483041 | 7086966 | 1095239 | --- | --- | --- | 1,29 | up   |
| 6483188 | 7256191 | 1512883 | --- | --- | --- | 1,14 | down |
| 6483201 | 7071616 | 1060073 | --- | --- | --- | 1,28 | up   |
| 6483378 | 7356115 | 1760123 | --- | --- | --- | 1,12 | up   |
| 6483468 | 7245921 | 1487678 | --- | --- | --- | 1,90 | up   |

|         |         |         |     |     |     |      |      |
|---------|---------|---------|-----|-----|-----|------|------|
| 6483525 | 7127691 | 1195635 | --- | --- | --- | 1,19 | down |
| 6483642 | 7087965 | 1098025 | --- | --- | --- | 1,17 | up   |
| 6483664 | 7274780 | 1559216 | --- | --- | --- | 1,25 | up   |
| 6483738 | 7226241 | 1437779 | --- | --- | --- | 1,45 | up   |
| 6483756 | 7186443 | 1341312 | --- | --- | --- | 1,20 | up   |
| 6483758 | 7125348 | 1190074 | --- | --- | --- | 1,18 | up   |
| 6483955 | 7245874 | 1487592 | --- | --- | --- | 1,13 | down |
| 6483991 | 7111573 | 1156022 | --- | --- | --- | 1,35 | down |
| 6484010 | 7313411 | 1655424 | --- | --- | --- | 1,51 | up   |
| 6484086 | 7280743 | 1574552 | --- | --- | --- | 1,16 | up   |
| 6484108 | 7352046 | 1750031 | --- | --- | --- | 1,05 | down |
| 6484326 | 7131360 | 1204969 | --- | --- | --- | 1,36 | up   |
| 6484504 | 7052813 | 1015884 | --- | --- | --- | 1,00 | down |
| 6484774 | 7253088 | 1505121 | --- | --- | --- | 1,30 | down |
| 6484950 | 7264085 | 1532719 | --- | --- | --- | 1,38 | down |
| 6484996 | 7137646 | 1220437 | --- | --- | --- | 1,16 | down |
| 6485013 | 7235069 | 1460969 | --- | --- | --- | 1,10 | up   |
| 6485061 | 7238115 | 1468570 | --- | --- | --- | 1,05 | up   |
| 6485083 | 7131360 | 1204982 | --- | --- | --- | 1,00 | down |
| 6485096 | 7266532 | 1538302 | --- | --- | --- | 1,74 | up   |
| 6485190 | 7316644 | 1664057 | --- | --- | --- | 1,15 | up   |
| 6485237 | 7127540 | 1195276 | --- | --- | --- | 1,11 | down |
| 6485314 | 7183182 | 1333562 | --- | --- | --- | 1,27 | down |
| 6485389 | 7089499 | 1102385 | --- | --- | --- | 1,24 | down |
| 6485510 | 7274780 | 1559201 | --- | --- | --- | 1,04 | up   |
| 6485526 | 7339387 | 1718374 | --- | --- | --- | 1,65 | up   |
| 6485578 | 7025652 | 950263  | --- | --- | --- | 1,02 | down |
| 6485723 | 7216132 | 1413399 | --- | --- | --- | 1,13 | down |
| 6485750 | 7108300 | 1147879 | --- | --- | --- | 1,41 | down |
| 6485767 | 7113483 | 1160997 | --- | --- | --- | 1,07 | up   |
| 6485846 | 7107926 | 1146847 | --- | --- | --- | 1,00 | down |
| 6485850 | 7373633 | 1805709 | --- | --- | --- | 1,05 | up   |
| 6485855 | 7312250 | 1652651 | --- | --- | --- | 1,31 | down |
| 6485860 | 7236358 | 1464254 | --- | --- | --- | 1,05 | down |
| 6485874 | 7372840 | 1803782 | --- | --- | --- | 1,13 | down |
| 6485920 | 7168858 | 1296843 | --- | --- | --- | 1,18 | down |
| 6486070 | 7096859 | 1119320 | --- | --- | --- | 1,20 | up   |
| 6486071 | 7098810 | 1124656 | --- | --- | --- | 1,24 | down |
| 6486108 | 7334347 | 1705774 | --- | --- | --- | 1,36 | down |
| 6486125 | 7059584 | 1030541 | --- | --- | --- | 1,07 | up   |
| 6486160 | 7338807 | 1716818 | --- | --- | --- | 1,18 | down |
| 6486197 | 7316644 | 1664044 | --- | --- | --- | 1,08 | down |
| 6486260 | 7188685 | 1346334 | --- | --- | --- | 1,19 | up   |
| 6486261 | 7243628 | 1482390 | --- | --- | --- | 1,05 | up   |
| 6486401 | 7070616 | 1057794 | --- | --- | --- | 1,12 | up   |
| 6486423 | 7231835 | 1452291 | --- | --- | --- | 1,35 | up   |
| 6486478 | 7321029 | 1674826 | --- | --- | --- | 1,56 | up   |
| 6486524 | 7099573 | 1126726 | --- | --- | --- | 1,44 | up   |
| 6486599 | 7049399 | 1008346 | --- | --- | --- | 1,16 | up   |
| 6486702 | 7336727 | 1711284 | --- | --- | --- | 2,19 | down |
| 6486716 | 7341546 | 1723976 | --- | --- | --- | 1,54 | down |
| 6486781 | 7244288 | 1484112 | --- | --- | --- | 1,70 | up   |
| 6486846 | 7112225 | 1157568 | --- | --- | --- | 1,08 | up   |
| 6486885 | 7096842 | 1119237 | --- | --- | --- | 1,14 | down |
| 6486917 | 7264274 | 1533170 | --- | --- | --- | 1,88 | up   |
| 6486994 | 7040260 | 986078  | --- | --- | --- | 1,01 | up   |

|         |         |         |     |     |     |      |      |
|---------|---------|---------|-----|-----|-----|------|------|
| 6487036 | 7177520 | 1318631 | --- | --- | --- | 1,43 | down |
| 6487150 | 7171525 | 1303466 | --- | --- | --- | 1,57 | down |
| 6487172 | 7068259 | 1051650 | --- | --- | --- | 1,37 | down |
| 6487202 | 7277783 | 1567442 | --- | --- | --- | 2,61 | up   |
| 6487322 | 7196029 | 1365619 | --- | --- | --- | 2,20 | down |
| 6487386 | 7231203 | 1450474 | --- | --- | --- | 1,80 | down |
| 6487500 | 7264274 | 1533169 | --- | --- | --- | 2,31 | up   |
| 6487711 | 7340258 | 1720734 | --- | --- | --- | 1,16 | up   |
| 6487732 | 7079600 | 1078634 | --- | --- | --- | 1,31 | up   |
| 6487784 | 7186106 | 1340499 | --- | --- | --- | 1,03 | down |
| 6487843 | 7350993 | 1747554 | --- | --- | --- | 1,38 | down |
| 6488004 | 7196029 | 1365605 | --- | --- | --- | 1,16 | down |
| 6488060 | 7059766 | 1030972 | --- | --- | --- | 1,46 | up   |
| 6488092 | 7034756 | 973235  | --- | --- | --- | 1,15 | up   |
| 6488520 | 7272110 | 1553077 | --- | --- | --- | 1,19 | up   |
| 6488539 | 7034293 | 971968  | --- | --- | --- | 1,71 | up   |
| 6488644 | 7065655 | 1045244 | --- | --- | --- | 1,08 | up   |
| 6488658 | 7199341 | 1374129 | --- | --- | --- | 1,27 | down |
| 6488693 | 7332970 | 1702554 | --- | --- | --- | 1,08 | up   |
| 6488720 | 7236254 | 1464069 | --- | --- | --- | 1,41 | down |
| 6488791 | 7069142 | 1053872 | --- | --- | --- | 1,19 | up   |
| 6489013 | 7196029 | 1365607 | --- | --- | --- | 1,21 | up   |
| 6489027 | 7240569 | 1475518 | --- | --- | --- | 1,48 | up   |
| 6489098 | 7064134 | 1041427 | --- | --- | --- | 1,44 | down |
| 6489113 | 7236358 | 1464222 | --- | --- | --- | 1,15 | down |
| 6489275 | 7213908 | 1407690 | --- | --- | --- | 1,18 | up   |
| 6489477 | 7037764 | 980064  | --- | --- | --- | 1,16 | down |
| 6489500 | 7031576 | 964111  | --- | --- | --- | 1,10 | down |
| 6489543 | 7357890 | 1764389 | --- | --- | --- | 1,07 | down |
| 6489584 | 7260553 | 1524113 | --- | --- | --- | 1,43 | up   |
| 6489644 | 7276650 | 1564148 | --- | --- | --- | 1,09 | down |
| 6489748 | 7272110 | 1553077 | --- | --- | --- | 1,52 | down |
| 6489865 | 7287222 | 1589720 | --- | --- | --- | 1,30 | up   |
| 6489913 | 7112225 | 1157620 | --- | --- | --- | 1,10 | down |
| 6489962 | 7308679 | 1644241 | --- | --- | --- | 1,50 | up   |
| 6490080 | 7243130 | 1480885 | --- | --- | --- | 1,02 | down |
| 6490297 | 7279793 | 1572538 | --- | --- | --- | 1,07 | up   |
| 6490399 | 7162177 | 1280575 | --- | --- | --- | 1,46 | down |
| 6490409 | 7133749 | 1210808 | --- | --- | --- | 1,37 | up   |
| 6490410 | 7193644 | 1359708 | --- | --- | --- | 1,35 | down |
| 6490580 | 7294151 | 1606609 | --- | --- | --- | 1,10 | up   |
| 6490582 | 7331297 | 1698810 | --- | --- | --- | 1,12 | down |
| 6490586 | 7346066 | 1735309 | --- | --- | --- | 1,01 | down |
| 6490616 | 7227313 | 1440692 | --- | --- | --- | 2,06 | up   |
| 6490678 | 7216132 | 1413398 | --- | --- | --- | 1,09 | down |
| 6490708 | 7033337 | 969519  | --- | --- | --- | 1,16 | up   |
| 6490726 | 7090278 | 1104135 | --- | --- | --- | 1,31 | down |
| 6490851 | 7065655 | 1045249 | --- | --- | --- | 1,34 | down |
| 6490907 | 7067828 | 1050794 | --- | --- | --- | 1,02 | up   |
| 6490940 | 7078666 | 1076506 | --- | --- | --- | 1,49 | down |
| 6490996 | 7293234 | 1604333 | --- | --- | --- | 1,84 | down |
| 6491134 | 7377583 | 1815456 | --- | --- | --- | 1,07 | up   |
| 6491153 | 7279568 | 1572014 | --- | --- | --- | 1,25 | down |
| 6491198 | 7042382 | 991287  | --- | --- | --- | 1,06 | up   |
| 6491209 | 7041584 | 989459  | --- | --- | --- | 1,39 | down |
| 6491277 | 7231203 | 1450456 | --- | --- | --- | 1,48 | up   |

|         |         |         |     |     |     |      |      |
|---------|---------|---------|-----|-----|-----|------|------|
| 6491302 | 7264274 | 1533166 | --- | --- | --- | 1,25 | down |
| 6491367 | 7098810 | 1124657 | --- | --- | --- | 1,27 | down |
| 6491374 | 7168858 | 1296834 | --- | --- | --- | 1,20 | down |
| 6491409 | 7358859 | 1767001 | --- | --- | --- | 1,42 | down |
| 6491490 | 7370412 | 1796832 | --- | --- | --- | 1,03 | up   |
| 6491640 | 7329846 | 1694999 | --- | --- | --- | 1,22 | up   |
| 6491660 | 7276650 | 1564150 | --- | --- | --- | 1,36 | up   |
| 6491748 | 7281494 | 1576584 | --- | --- | --- | 1,01 | down |
| 6491778 | 7236358 | 1464222 | --- | --- | --- | 1,19 | down |
| 6491829 | 7354688 | 1756380 | --- | --- | --- | 1,55 | down |
| 6491877 | 7238826 | 1470532 | --- | --- | --- | 1,85 | down |
| 6491929 | 7087965 | 1098060 | --- | --- | --- | 1,24 | down |
| 6491948 | 7031774 | 964761  | --- | --- | --- | 1,29 | down |
| 6492022 | 7084993 | 1090679 | --- | --- | --- | 1,97 | up   |
| 6492056 | 7341253 | 1723300 | --- | --- | --- | 1,43 | up   |
| 6492070 | 7198002 | 1370413 | --- | --- | --- | 1,97 | up   |
| 6492090 | 7043379 | 993631  | --- | --- | --- | 1,14 | down |
| 6492100 | 7098366 | 1123608 | --- | --- | --- | 1,01 | up   |
| 6492149 | 7037235 | 978573  | --- | --- | --- | 1,32 | down |
| 6492201 | 7084193 | 1089061 | --- | --- | --- | 1,37 | up   |
| 6492319 | 7193056 | 1358264 | --- | --- | --- | 1,13 | up   |
| 6492342 | 7248790 | 1494516 | --- | --- | --- | 1,24 | up   |
| 6492348 | 7144389 | 1236780 | --- | --- | --- | 1,20 | up   |
| 6492351 | 7035344 | 974297  | --- | --- | --- | 1,27 | up   |
| 6492453 | 7239752 | 1473156 | --- | --- | --- | 1,04 | down |
| 6492490 | 7041609 | 989565  | --- | --- | --- | 1,10 | up   |
| 6492626 | 7181961 | 1330342 | --- | --- | --- | 1,17 | up   |
| 6492839 | 7209927 | 1398922 | --- | --- | --- | 1,09 | up   |
| 6492896 | 7083030 | 1086245 | --- | --- | --- | 1,17 | down |
| 6493008 | 7146245 | 1241349 | --- | --- | --- | 1,11 | up   |
| 6493151 | 7174149 | 1310493 | --- | --- | --- | 1,38 | up   |
| 6493182 | 7221187 | 1425723 | --- | --- | --- | 1,08 | down |
| 6493256 | 7364346 | 1779984 | --- | --- | --- | 1,17 | up   |
| 6493353 | 7297154 | 1614239 | --- | --- | --- | 1,44 | up   |
| 6493378 | 7267802 | 1541742 | --- | --- | --- | 1,21 | down |
| 6493426 | 7033451 | 969773  | --- | --- | --- | 1,14 | down |
| 6493432 | 7235426 | 1461847 | --- | --- | --- | 1,19 | down |
| 6493468 | 7312621 | 1653462 | --- | --- | --- | 1,13 | up   |
| 6493471 | 7099030 | 1125337 | --- | --- | --- | 1,44 | up   |
| 6493508 | 7385253 | 1832225 | --- | --- | --- | 1,26 | up   |
| 6493546 | 7112566 | 1158626 | --- | --- | --- | 1,16 | up   |
| 6493583 | 7334331 | 1705687 | --- | --- | --- | 1,13 | down |
| 6493594 | 7050167 | 1009819 | --- | --- | --- | 1,01 | down |
| 6493633 | 7045955 | 1000757 | --- | --- | --- | 2,42 | down |
| 6493973 | 7028624 | 958001  | --- | --- | --- | 1,20 | up   |
| 6494118 | 7078666 | 1076515 | --- | --- | --- | 1,01 | down |
| 6494154 | 7064732 | 1042918 | --- | --- | --- | 1,08 | up   |
| 6494268 | 7293757 | 1605692 | --- | --- | --- | 1,06 | up   |
| 6494291 | 7212718 | 1404949 | --- | --- | --- | 1,33 | up   |
| 6494468 | 7037764 | 980085  | --- | --- | --- | 1,40 | down |
| 6494510 | 7378637 | 1817829 | --- | --- | --- | 1,28 | down |
| 6494532 | 7264797 | 1534422 | --- | --- | --- | 1,01 | up   |
| 6494541 | 7240569 | 1475472 | --- | --- | --- | 1,07 | up   |
| 6494816 | 7333462 | 1703648 | --- | --- | --- | 1,58 | down |
| 6494866 | 7048382 | 1006359 | --- | --- | --- | 1,10 | up   |
| 6495008 | 7078666 | 1076521 | --- | --- | --- | 1,10 | up   |

|         |         |         |     |     |     |      |      |
|---------|---------|---------|-----|-----|-----|------|------|
| 6495026 | 7174281 | 1310843 | --- | --- | --- | 1,22 | down |
| 6495158 | 7052813 | 1015936 | --- | --- | --- | 1,06 | down |
| 6495166 | 7228520 | 1443766 | --- | --- | --- | 2,00 | down |
| 6495249 | 7374842 | 1808989 | --- | --- | --- | 1,30 | down |
| 6495263 | 7341546 | 1723952 | --- | --- | --- | 1,07 | down |
| 6495286 | 7273223 | 1555871 | --- | --- | --- | 1,18 | down |
| 6495304 | 7120827 | 1179300 | --- | --- | --- | 2,27 | down |
| 6495418 | 7323545 | 1679950 | --- | --- | --- | 2,48 | down |
| 6495520 | 7280743 | 1574485 | --- | --- | --- | 1,03 | up   |
| 6495543 | 7291054 | 1599392 | --- | --- | --- | 1,29 | down |
| 6495703 | 7150631 | 1252159 | --- | --- | --- | 1,26 | down |
| 6495849 | 7061367 | 1034853 | --- | --- | --- | 1,11 | up   |
| 6495916 | 7072552 | 1062132 | --- | --- | --- | 1,10 | up   |
| 6495947 | 7167700 | 1293611 | --- | --- | --- | 1,04 | up   |
| 6495960 | 7087965 | 1098045 | --- | --- | --- | 1,07 | down |
| 6496035 | 7316644 | 1664048 | --- | --- | --- | 1,06 | down |
| 6496063 | 7069253 | 1054158 | --- | --- | --- | 1,46 | down |
| 6496079 | 7226241 | 1437773 | --- | --- | --- | 1,41 | down |
| 6496146 | 7331297 | 1698804 | --- | --- | --- | 1,14 | up   |
| 6496213 | 7062173 | 1037017 | --- | --- | --- | 1,28 | up   |
| 6496254 | 7331829 | 1700185 | --- | --- | --- | 1,17 | down |
| 6496265 | 7243363 | 1481627 | --- | --- | --- | 1,55 | down |
| 6496396 | 7323545 | 1679931 | --- | --- | --- | 1,05 | down |
| 6496451 | 7186464 | 1341356 | --- | --- | --- | 1,03 | down |
| 6496505 | 7121866 | 1181860 | --- | --- | --- | 1,07 | down |
| 6496562 | 7257976 | 1517705 | --- | --- | --- | 1,08 | up   |
| 6496758 | 7295410 | 1609698 | --- | --- | --- | 1,12 | up   |
| 6496812 | 7243363 | 1481603 | --- | --- | --- | 1,33 | up   |
| 6496835 | 7319151 | 1670111 | --- | --- | --- | 1,75 | down |
| 6496969 | 7351951 | 1749840 | --- | --- | --- | 1,00 | up   |
| 6497009 | 7111573 | 1156022 | --- | --- | --- | 1,59 | down |
| 6497119 | 7341253 | 1723246 | --- | --- | --- | 1,05 | up   |
| 6497126 | 7191594 | 1354223 | --- | --- | --- | 1,51 | up   |
| 6497210 | 7080731 | 1080977 | --- | --- | --- | 2,83 | up   |
| 6497347 | 7240569 | 1475501 | --- | --- | --- | 1,74 | down |
| 6497375 | 7369712 | 1794832 | --- | --- | --- | 1,65 | up   |
| 6497376 | 7130889 | 1203864 | --- | --- | --- | 1,32 | down |
| 6497538 | 7193056 | 1358289 | --- | --- | --- | 1,86 | up   |
| 6497780 | 7111244 | 1155380 | --- | --- | --- | 2,17 | up   |
| 6497796 | 7096924 | 1119612 | --- | --- | --- | 1,53 | down |
| 6497799 | 7144135 | 1236326 | --- | --- | --- | 1,16 | down |
| 6497879 | 7340757 | 1721904 | --- | --- | --- | 1,07 | up   |
| 6497904 | 7248964 | 1494939 | --- | --- | --- | 1,11 | up   |
| 6497921 | 7029770 | 960156  | --- | --- | --- | 1,67 | up   |
| 6498006 | 7037764 | 980109  | --- | --- | --- | 1,24 | down |
| 6498024 | 7109373 | 1150917 | --- | --- | --- | 1,58 | down |
| 6498098 | 7146982 | 1243281 | --- | --- | --- | 1,35 | down |
| 6498251 | 7230611 | 1448818 | --- | --- | --- | 1,07 | up   |
| 6498303 | 7243130 | 1480837 | --- | --- | --- | 1,04 | down |
| 6498354 | 7189574 | 1348711 | --- | --- | --- | 1,15 | down |
| 6498476 | 7235069 | 1460992 | --- | --- | --- | 1,13 | down |
| 6498491 | 7232029 | 1452788 | --- | --- | --- | 1,08 | down |
| 6498516 | 7364346 | 1780000 | --- | --- | --- | 1,04 | down |
| 6498602 | 7174149 | 1310489 | --- | --- | --- | 1,69 | down |
| 6498639 | 7280743 | 1574570 | --- | --- | --- | 1,01 | up   |
| 6498716 | 7142416 | 1231799 | --- | --- | --- | 2,16 | up   |

|         |         |         |     |     |     |      |      |
|---------|---------|---------|-----|-----|-----|------|------|
| 6498744 | 7156052 | 1265764 | --- | --- | --- | 1,02 | down |
| 6498753 | 7247229 | 1490545 | --- | --- | --- | 1,31 | up   |
| 6498759 | 7260613 | 1524267 | --- | --- | --- | 1,34 | up   |
| 6498776 | 7260553 | 1524109 | --- | --- | --- | 1,02 | down |
| 6498826 | 7274780 | 1559235 | --- | --- | --- | 1,06 | up   |
| 6498831 | 7148978 | 1248486 | --- | --- | --- | 1,02 | up   |
| 6498911 | 7069253 | 1054157 | --- | --- | --- | 1,23 | up   |
| 6498948 | 7302018 | 1626995 | --- | --- | --- | 1,75 | up   |
| 6499001 | 7319937 | 1672284 | --- | --- | --- | 2,16 | up   |
| 6499198 | 7080106 | 1079719 | --- | --- | --- | 1,04 | up   |
| 6499218 | 7286807 | 1588824 | --- | --- | --- | 1,28 | down |
| 6499292 | 7064220 | 1041746 | --- | --- | --- | 1,04 | down |
| 6499325 | 7068942 | 1053377 | --- | --- | --- | 1,18 | down |
| 6499338 | 7298692 | 1618409 | --- | --- | --- | 1,28 | up   |
| 6499498 | 7343122 | 1727747 | --- | --- | --- | 2,45 | down |
| 6499850 | 7331602 | 1699633 | --- | --- | --- | 1,02 | up   |
| 6499878 | 7357815 | 1764146 | --- | --- | --- | 1,08 | up   |
| 6499958 | 7329846 | 1694995 | --- | --- | --- | 2,68 | down |
| 6500000 | 7235393 | 1461717 | --- | --- | --- | 4,71 | down |
| 6500009 | 7049399 | 1008332 | --- | --- | --- | 1,00 | up   |
| 6500093 | 7127797 | 1195852 | --- | --- | --- | 1,13 | up   |
| 6500148 | 7247334 | 1490820 | --- | --- | --- | 1,39 | up   |
| 6500175 | 7297274 | 1614658 | --- | --- | --- | 1,17 | up   |
| 6500199 | 7276231 | 1563105 | --- | --- | --- | 1,06 | up   |
| 6500435 | 7199476 | 1374559 | --- | --- | --- | 1,14 | down |
| 6500528 | 7064468 | 1042367 | --- | --- | --- | 1,32 | up   |
| 6500537 | 7192696 | 1357181 | --- | --- | --- | 1,53 | up   |
| 6500556 | 7277719 | 1567090 | --- | --- | --- | 1,07 | down |
| 6500582 | 7207069 | 1392035 | --- | --- | --- | 1,26 | up   |
| 6500690 | 7078666 | 1076517 | --- | --- | --- | 1,56 | up   |
| 6500746 | 7236395 | 1464328 | --- | --- | --- | 1,02 | down |
| 6500763 | 7367994 | 1789235 | --- | --- | --- | 1,16 | up   |
| 6500808 | 7328695 | 1692304 | --- | --- | --- | 1,61 | up   |
| 6500869 | 7059020 | 1029344 | --- | --- | --- | 1,36 | up   |
| 6500897 | 7149008 | 1248598 | --- | --- | --- | 1,46 | up   |
| 6500905 | 7032204 | 966146  | --- | --- | --- | 1,55 | up   |
| 6501010 | 7034486 | 972518  | --- | --- | --- | 1,24 | down |
| 6501188 | 7093806 | 1112150 | --- | --- | --- | 2,21 | down |
| 6501232 | 7098366 | 1123620 | --- | --- | --- | 1,10 | up   |
| 6501238 | 7031774 | 964784  | --- | --- | --- | 1,21 | down |
| 6501267 | 7368613 | 1791621 | --- | --- | --- | 1,09 | up   |
| 6501329 | 7344702 | 1732140 | --- | --- | --- | 1,01 | up   |
| 6501349 | 7068259 | 1051658 | --- | --- | --- | 1,16 | down |
| 6501522 | 7038316 | 981460  | --- | --- | --- | 1,42 | up   |
| 6501625 | 7051009 | 1011790 | --- | --- | --- | 1,26 | down |
| 6501732 | 7292154 | 1601631 | --- | --- | --- | 1,00 | down |
| 6501743 | 7171047 | 1302370 | --- | --- | --- | 1,01 | down |
| 6501773 | 7277783 | 1567477 | --- | --- | --- | 1,73 | down |
| 6501786 | 7035344 | 974298  | --- | --- | --- | 1,12 | down |
| 6501815 | 7218259 | 1418787 | --- | --- | --- | 1,17 | down |
| 6501951 | 7308679 | 1644250 | --- | --- | --- | 1,09 | up   |
| 6501971 | 7189184 | 1347597 | --- | --- | --- | 1,57 | down |
| 6501984 | 7344702 | 1732141 | --- | --- | --- | 1,09 | down |
| 6501997 | 7034532 | 972651  | --- | --- | --- | 1,08 | up   |
| 6502059 | 7370475 | 1797137 | --- | --- | --- | 1,29 | up   |
| 6502098 | 7050557 | 1010791 | --- | --- | --- | 1,25 | down |

|         |         |         |     |     |     |      |      |
|---------|---------|---------|-----|-----|-----|------|------|
| 6502104 | 7339387 | 1718394 | --- | --- | --- | 1,43 | up   |
| 6502198 | 7364995 | 1781295 | --- | --- | --- | 2,15 | up   |
| 6502297 | 7148978 | 1248462 | --- | --- | --- | 1,06 | down |
| 6502329 | 7033672 | 970363  | --- | --- | --- | 1,52 | down |
| 6502474 | 7033616 | 970207  | --- | --- | --- | 1,25 | down |
| 6502482 | 7281507 | 1576662 | --- | --- | --- | 1,01 | down |
| 6502516 | 7132024 | 1206337 | --- | --- | --- | 2,06 | down |
| 6502549 | 7321465 | 1675744 | --- | --- | --- | 1,75 | up   |
| 6502586 | 7354688 | 1756373 | --- | --- | --- | 1,24 | down |
| 6502630 | 7352635 | 1751444 | --- | --- | --- | 1,19 | down |
| 6502671 | 7030454 | 961549  | --- | --- | --- | 2,09 | down |
| 6502689 | 7323545 | 1679925 | --- | --- | --- | 1,34 | down |
| 6502737 | 7075424 | 1069296 | --- | --- | --- | 1,08 | down |
| 6502741 | 7332970 | 1702533 | --- | --- | --- | 1,15 | up   |
| 6502770 | 7337224 | 1712607 | --- | --- | --- | 1,35 | up   |
| 6502817 | 7275927 | 1562337 | --- | --- | --- | 1,32 | up   |
| 6502868 | 7098126 | 1122968 | --- | --- | --- | 1,15 | up   |
| 6502883 | 7038316 | 981459  | --- | --- | --- | 1,02 | up   |
| 6502929 | 7174149 | 1310494 | --- | --- | --- | 1,03 | down |
| 6502958 | 7031774 | 964735  | --- | --- | --- | 1,49 | up   |
| 6502986 | 7356115 | 1760124 | --- | --- | --- | 1,09 | up   |
| 6502991 | 7131360 | 1204969 | --- | --- | --- | 1,12 | down |
| 6502992 | 7369706 | 1794797 | --- | --- | --- | 1,75 | up   |
| 6503153 | 7123421 | 1185828 | --- | --- | --- | 1,77 | down |
| 6503193 | 7370128 | 1796171 | --- | --- | --- | 1,27 | down |
| 6503321 | 7039728 | 984845  | --- | --- | --- | 2,33 | down |
| 6503357 | 7243130 | 1480862 | --- | --- | --- | 1,26 | up   |
| 6503390 | 7364995 | 1781316 | --- | --- | --- | 2,13 | up   |
| 6503431 | 7241136 | 1476722 | --- | --- | --- | 1,05 | down |
| 6503451 | 7340258 | 1720734 | --- | --- | --- | 1,14 | up   |
| 6503503 | 7211363 | 1402041 | --- | --- | --- | 1,59 | up   |
| 6503578 | 7290288 | 1597341 | --- | --- | --- | 2,20 | down |
| 6503613 | 7073854 | 1065629 | --- | --- | --- | 1,07 | up   |
| 6503705 | 7070140 | 1056507 | --- | --- | --- | 1,40 | up   |
| 6503769 | 7247229 | 1490552 | --- | --- | --- | 1,03 | down |
| 6503839 | 7038530 | 981884  | --- | --- | --- | 1,62 | down |
| 6503870 | 7243130 | 1480894 | --- | --- | --- | 1,12 | up   |
| 6503915 | 7214605 | 1409365 | --- | --- | --- | 1,26 | down |
| 6504047 | 7308679 | 1644238 | --- | --- | --- | 1,64 | up   |
| 6504056 | 7186688 | 1341840 | --- | --- | --- | 1,36 | down |
| 6504132 | 7351951 | 1749853 | --- | --- | --- | 1,02 | down |
| 6504285 | 7157341 | 1269209 | --- | --- | --- | 1,16 | down |
| 6504315 | 7052813 | 1015929 | --- | --- | --- | 1,59 | up   |
| 6504343 | 7235069 | 1460994 | --- | --- | --- | 1,22 | up   |
| 6504361 | 7079600 | 1078632 | --- | --- | --- | 1,23 | down |
| 6504384 | 7069464 | 1054656 | --- | --- | --- | 1,37 | down |
| 6504537 | 7245066 | 1485571 | --- | --- | --- | 1,53 | up   |
| 6504598 | 7273744 | 1557006 | --- | --- | --- | 1,12 | down |
| 6504607 | 7095021 | 1115129 | --- | --- | --- | 1,64 | down |
| 6504743 | 7041061 | 988079  | --- | --- | --- | 1,48 | up   |
| 6504752 | 7286807 | 1588797 | --- | --- | --- | 1,35 | down |
| 6504823 | 7174149 | 1310501 | --- | --- | --- | 1,05 | up   |
| 6504845 | 7064224 | 1041797 | --- | --- | --- | 1,25 | down |
| 6504875 | 7085848 | 1092432 | --- | --- | --- | 1,11 | up   |
| 6504966 | 7127257 | 1194806 | --- | --- | --- | 1,10 | up   |
| 6504987 | 7277719 | 1567081 | --- | --- | --- | 1,12 | down |

|         |         |         |     |     |     |      |      |
|---------|---------|---------|-----|-----|-----|------|------|
| 6505010 | 7198210 | 1370969 | --- | --- | --- | 1,06 | down |
| 6505028 | 7167507 | 1293120 | --- | --- | --- | 1,33 | down |
| 6505034 | 7341002 | 1722547 | --- | --- | --- | 1,35 | up   |
| 6505043 | 7332970 | 1702553 | --- | --- | --- | 1,15 | up   |
| 6505086 | 7098126 | 1122968 | --- | --- | --- | 1,44 | up   |
| 6505126 | 7309703 | 1646819 | --- | --- | --- | 1,04 | up   |
| 6505135 | 7339379 | 1718338 | --- | --- | --- | 1,13 | down |
| 6505365 | 7089381 | 1102063 | --- | --- | --- | 1,24 | up   |
| 6505557 | 7097240 | 1120368 | --- | --- | --- | 2,55 | down |
| 6505698 | 7117832 | 1171754 | --- | --- | --- | 1,00 | up   |
| 6505706 | 7076236 | 1071194 | --- | --- | --- | 1,03 | down |
| 6505767 | 7243653 | 1482541 | --- | --- | --- | 1,16 | down |
| 6505807 | 7294151 | 1606605 | --- | --- | --- | 1,26 | up   |
| 6505815 | 7059020 | 1029330 | --- | --- | --- | 1,54 | down |
| 6505823 | 7102113 | 1132787 | --- | --- | --- | 1,26 | down |
| 6505889 | 7363674 | 1778429 | --- | --- | --- | 1,03 | down |
| 6505908 | 7196029 | 1365608 | --- | --- | --- | 1,01 | down |
| 6505911 | 7365183 | 1781940 | --- | --- | --- | 1,26 | up   |
| 6505999 | 7029078 | 958879  | --- | --- | --- | 1,15 | up   |
| 6506103 | 7047865 | 1005352 | --- | --- | --- | 2,04 | up   |
| 6506427 | 7062927 | 1038621 | --- | --- | --- | 1,23 | up   |
| 6506446 | 7295410 | 1609772 | --- | --- | --- | 1,15 | down |
| 6506564 | 7327650 | 1689694 | --- | --- | --- | 1,20 | up   |
| 6506659 | 7249737 | 1496747 | --- | --- | --- | 1,35 | up   |
| 6506672 | 7381352 | 1823742 | --- | --- | --- | 1,18 | down |
| 6506821 | 7133612 | 1210206 | --- | --- | --- | 1,21 | down |
| 6506835 | 7233440 | 1456837 | --- | --- | --- | 1,40 | down |
| 6506872 | 7040260 | 986074  | --- | --- | --- | 1,01 | up   |
| 6506919 | 7098810 | 1124658 | --- | --- | --- | 1,05 | down |
| 6507072 | 7258520 | 1518872 | --- | --- | --- | 1,17 | down |
| 6507076 | 7146093 | 1240975 | --- | --- | --- | 1,10 | up   |
| 6507106 | 7108300 | 1147913 | --- | --- | --- | 1,34 | down |
| 6507168 | 7330078 | 1695469 | --- | --- | --- | 1,28 | up   |
| 6507248 | 7092549 | 1109164 | --- | --- | --- | 1,31 | up   |
| 6507254 | 7276231 | 1563113 | --- | --- | --- | 1,08 | down |
| 6507276 | 7291129 | 1599591 | --- | --- | --- | 1,07 | down |
| 6507309 | 7119930 | 1177212 | --- | --- | --- | 1,18 | down |
| 6507329 | 7120690 | 1179048 | --- | --- | --- | 1,08 | up   |
| 6507418 | 7031774 | 964706  | --- | --- | --- | 1,07 | down |
| 6507447 | 7141421 | 1229477 | --- | --- | --- | 1,03 | down |
| 6507477 | 7367959 | 1789075 | --- | --- | --- | 1,20 | down |
| 6507591 | 7078666 | 1076505 | --- | --- | --- | 1,15 | up   |
| 6507643 | 7307721 | 1641986 | --- | --- | --- | 1,18 | up   |
| 6507774 | 7340990 | 1722501 | --- | --- | --- | 1,15 | down |
| 6507873 | 7333333 | 1703387 | --- | --- | --- | 1,08 | down |
| 6507913 | 7028624 | 957997  | --- | --- | --- | 1,06 | down |
| 6507977 | 7097485 | 1120935 | --- | --- | --- | 1,09 | up   |
| 6508067 | 7167507 | 1293121 | --- | --- | --- | 1,06 | up   |
| 6508121 | 7031774 | 964771  | --- | --- | --- | 1,07 | up   |
| 6508214 | 7237711 | 1467423 | --- | --- | --- | 1,23 | up   |
| 6508328 | 7293757 | 1605676 | --- | --- | --- | 1,27 | down |
| 6508472 | 7342959 | 1727332 | --- | --- | --- | 1,00 | down |
| 6508498 | 7041609 | 989581  | --- | --- | --- | 1,04 | up   |
| 6508527 | 7200996 | 1378167 | --- | --- | --- | 2,02 | up   |
| 6508601 | 7274780 | 1559222 | --- | --- | --- | 1,29 | up   |
| 6508739 | 7144135 | 1236327 | --- | --- | --- | 1,04 | down |



|         |         |         |     |     |     |      |      |
|---------|---------|---------|-----|-----|-----|------|------|
| 6508756 | 7176409 | 1315676 | --- | --- | --- | 1,15 | down |
| 6508907 | 7112225 | 1157579 | --- | --- | --- | 1,22 | down |
| 6508940 | 7064468 | 1042377 | --- | --- | --- | 1,07 | down |
| 6508941 | 7330078 | 1695472 | --- | --- | --- | 1,05 | up   |
| 6509022 | 7099156 | 1125638 | --- | --- | --- | 2,11 | up   |
| 6509138 | 7040260 | 986093  | --- | --- | --- | 1,86 | down |
| 6509241 | 7115362 | 1165598 | --- | --- | --- | 1,34 | up   |
| 6509275 | 7072225 | 1061400 | --- | --- | --- | 1,01 | up   |
| 6509290 | 7031618 | 964198  | --- | --- | --- | 1,17 | up   |
| 6509343 | 7350993 | 1747538 | --- | --- | --- | 1,00 | down |
| 6509351 | 7074132 | 1066319 | --- | --- | --- | 1,15 | up   |
| 6509424 | 7113984 | 1162227 | --- | --- | --- | 1,29 | up   |
| 6509566 | 7302786 | 1628862 | --- | --- | --- | 1,15 | down |
| 6509593 | 7132125 | 1206621 | --- | --- | --- | 1,26 | down |
| 6509634 | 7180943 | 1327442 | --- | --- | --- | 1,04 | up   |
| 6509651 | 7112225 | 1157582 | --- | --- | --- | 1,20 | down |
| 6509728 | 7111244 | 1155379 | --- | --- | --- | 1,23 | down |
| 6509905 | 7338807 | 1716801 | --- | --- | --- | 1,16 | down |
| 6509952 | 7062529 | 1037857 | --- | --- | --- | 1,08 | up   |
| 6509958 | 7192186 | 1355615 | --- | --- | --- | 1,05 | down |
| 6510014 | 7102708 | 1134317 | --- | --- | --- | 1,09 | up   |
| 6510297 | 7033337 | 969501  | --- | --- | --- | 1,44 | up   |
| 6510298 | 7331434 | 1699227 | --- | --- | --- | 1,04 | down |
| 6510317 | 7232340 | 1453533 | --- | --- | --- | 1,40 | down |
| 6510352 | 7189689 | 1349040 | --- | --- | --- | 1,22 | up   |
| 6510354 | 7158408 | 1271348 | --- | --- | --- | 2,65 | up   |
| 6510634 | 7342356 | 1725894 | --- | --- | --- | 1,77 | up   |
| 6510700 | 7337260 | 1712796 | --- | --- | --- | 1,04 | down |
| 6510722 | 7151063 | 1253066 | --- | --- | --- | 1,22 | up   |
| 6510884 | 7221019 | 1425327 | --- | --- | --- | 8,01 | up   |
| 6510974 | 7248790 | 1494505 | --- | --- | --- | 1,24 | down |
| 6511006 | 7042382 | 991289  | --- | --- | --- | 1,06 | down |
| 6511028 | 7243130 | 1480835 | --- | --- | --- | 1,58 | up   |
| 6511163 | 7378997 | 1818652 | --- | --- | --- | 1,11 | up   |
| 6511250 | 7050930 | 1011627 | --- | --- | --- | 1,06 | down |
| 6511256 | 7029770 | 960155  | --- | --- | --- | 1,43 | up   |
| 6511347 | 7059766 | 1030973 | --- | --- | --- | 1,67 | up   |
| 6511386 | 7239752 | 1473192 | --- | --- | --- | 1,16 | down |
| 6511451 | 7356115 | 1760131 | --- | --- | --- | 1,06 | down |
| 6511532 | 7098810 | 1124655 | --- | --- | --- | 1,21 | up   |
| 6511588 | 7198210 | 1370962 | --- | --- | --- | 1,27 | up   |
| 6511649 | 7344406 | 1731201 | --- | --- | --- | 1,07 | up   |
| 6511675 | 7277719 | 1567080 | --- | --- | --- | 1,15 | down |
| 6511772 | 7279568 | 1572002 | --- | --- | --- | 1,15 | up   |
| 6511781 | 7340757 | 1721884 | --- | --- | --- | 1,34 | down |
| 6511789 | 7243130 | 1480943 | --- | --- | --- | 1,48 | up   |
| 6511851 | 7040260 | 986062  | --- | --- | --- | 1,02 | down |
| 6511912 | 7067614 | 1050197 | --- | --- | --- | 1,28 | up   |
| 6511919 | 7193644 | 1359710 | --- | --- | --- | 1,03 | up   |
| 6511969 | 7093936 | 1112481 | --- | --- | --- | 1,06 | up   |
| 6511977 | 7374842 | 1808998 | --- | --- | --- | 1,54 | up   |
| 6512033 | 7127540 | 1195287 | --- | --- | --- | 1,10 | up   |
| 6512064 | 7037806 | 980195  | --- | --- | --- | 2,13 | down |
| 6512080 | 7068942 | 1053390 | --- | --- | --- | 1,08 | down |
| 6512176 | 7171525 | 1303428 | --- | --- | --- | 1,01 | up   |
| 6512234 | 7038969 | 982974  | --- | --- | --- | 1,29 | up   |

|         |         |         |     |     |     |      |      |
|---------|---------|---------|-----|-----|-----|------|------|
| 6512341 | 7284359 | 1583435 | --- | --- | --- | 1,42 | down |
| 6512447 | 7050167 | 1009828 | --- | --- | --- | 1,47 | up   |
| 6512518 | 7312575 | 1653354 | --- | --- | --- | 1,06 | up   |
| 6512615 | 7236987 | 1465734 | --- | --- | --- | 2,11 | down |
| 6512635 | 7328833 | 1692804 | --- | --- | --- | 1,08 | down |
| 6512666 | 7121866 | 1181861 | --- | --- | --- | 1,25 | down |
| 6512682 | 7376820 | 1813429 | --- | --- | --- | 1,27 | down |
| 6512751 | 7155286 | 1263891 | --- | --- | --- | 1,06 | up   |
| 6512920 | 7359453 | 1768448 | --- | --- | --- | 1,48 | down |
| 6512930 | 7075445 | 1069349 | --- | --- | --- | 1,54 | down |
| 6513106 | 7363576 | 1778169 | --- | --- | --- | 1,11 | up   |
| 6513175 | 7312621 | 1653457 | --- | --- | --- | 1,09 | down |
| 6513196 | 7056333 | 1023678 | --- | --- | --- | 1,49 | up   |
| 6513198 | 7279303 | 1571201 | --- | --- | --- | 1,14 | down |
| 6513332 | 7054147 | 1018982 | --- | --- | --- | 1,12 | down |
| 6513377 | 7165954 | 1288770 | --- | --- | --- | 1,32 | down |
| 6513398 | 7295410 | 1609794 | --- | --- | --- | 1,07 | down |
| 6513399 | 7351951 | 1749823 | --- | --- | --- | 1,05 | up   |
| 6513402 | 7177520 | 1318622 | --- | --- | --- | 1,06 | up   |
| 6513467 | 7038316 | 981460  | --- | --- | --- | 1,62 | down |
| 6513535 | 7319144 | 1670087 | --- | --- | --- | 1,02 | down |
| 6513666 | 7236987 | 1465738 | --- | --- | --- | 1,36 | up   |
| 6513733 | 7249503 | 1496202 | --- | --- | --- | 1,08 | up   |
| 6513791 | 7062436 | 1037660 | --- | --- | --- | 1,56 | down |
| 6513858 | 7243628 | 1482385 | --- | --- | --- | 1,33 | up   |
| 6513864 | 7351951 | 1749822 | --- | --- | --- | 1,04 | down |
| 6513969 | 7231835 | 1452290 | --- | --- | --- | 1,08 | up   |
| 6513988 | 7100257 | 1128219 | --- | --- | --- | 1,05 | down |
| 6514029 | 7068853 | 1053130 | --- | --- | --- | 1,05 | down |
| 6514064 | 7331434 | 1699218 | --- | --- | --- | 1,27 | up   |
| 6514079 | 7200545 | 1376898 | --- | --- | --- | 1,22 | down |
| 6514163 | 7042382 | 991289  | --- | --- | --- | 1,37 | up   |
| 6514212 | 7239774 | 1473319 | --- | --- | --- | 1,38 | up   |
| 6514280 | 7213908 | 1407711 | --- | --- | --- | 1,82 | down |
| 6514303 | 7111573 | 1156025 | --- | --- | --- | 1,10 | down |
| 6514316 | 7108551 | 1148702 | --- | --- | --- | 1,01 | down |
| 6514389 | 7167507 | 1293144 | --- | --- | --- | 1,06 | down |
| 6514412 | 7194017 | 1360793 | --- | --- | --- | 1,65 | down |
| 6514458 | 7258784 | 1519671 | --- | --- | --- | 1,26 | down |
| 6514493 | 7075424 | 1069291 | --- | --- | --- | 1,25 | up   |
| 6514507 | 7157341 | 1269209 | --- | --- | --- | 1,09 | up   |
| 6514572 | 7059766 | 1030980 | --- | --- | --- | 1,38 | up   |
| 6514642 | 7086522 | 1093956 | --- | --- | --- | 1,15 | down |
| 6514667 | 7247976 | 1492430 | --- | --- | --- | 1,15 | down |
| 6514792 | 7083160 | 1086552 | --- | --- | --- | 1,01 | up   |
| 6514892 | 7376566 | 1812869 | --- | --- | --- | 1,20 | up   |
| 6514917 | 7217747 | 1417481 | --- | --- | --- | 1,10 | down |
| 6515005 | 7358859 | 1766960 | --- | --- | --- | 1,30 | down |
| 6515059 | 7203872 | 1384759 | --- | --- | --- | 1,08 | up   |
| 6515095 | 7112225 | 1157586 | --- | --- | --- | 1,01 | up   |
| 6515199 | 7061003 | 1033923 | --- | --- | --- | 1,07 | down |
| 6515221 | 7195903 | 1365330 | --- | --- | --- | 1,62 | down |
| 6515222 | 7264808 | 1534465 | --- | --- | --- | 1,24 | down |
| 6515250 | 7148978 | 1248467 | --- | --- | --- | 1,76 | up   |
| 6515367 | 7138047 | 1221236 | --- | --- | --- | 1,26 | down |
| 6515376 | 7263152 | 1530371 | --- | --- | --- | 1,20 | up   |

|         |         |         |     |     |     |      |      |
|---------|---------|---------|-----|-----|-----|------|------|
| 6515390 | 7359426 | 1768370 | --- | --- | --- | 1,14 | down |
| 6515987 | 7258520 | 1518871 | --- | --- | --- | 1,31 | up   |
| 6516018 | 7119556 | 1176078 | --- | --- | --- | 1,07 | up   |
| 6516055 | 7371539 | 1800302 | --- | --- | --- | 1,13 | down |
| 6516113 | 7031618 | 964199  | --- | --- | --- | 1,17 | up   |
| 6516151 | 7162144 | 1280519 | --- | --- | --- | 1,59 | up   |
| 6516210 | 7378546 | 1817602 | --- | --- | --- | 1,13 | down |
| 6516235 | 7116103 | 1167606 | --- | --- | --- | 1,04 | down |
| 6516257 | 7319486 | 1670927 | --- | --- | --- | 1,29 | up   |
| 6516455 | 7120010 | 1177382 | --- | --- | --- | 1,17 | down |
| 6516472 | 7267802 | 1541832 | --- | --- | --- | 1,11 | up   |
| 6516499 | 7138047 | 1221237 | --- | --- | --- | 1,04 | up   |
| 6516570 | 7372840 | 1803754 | --- | --- | --- | 1,26 | up   |
| 6516589 | 7243647 | 1482436 | --- | --- | --- | 1,26 | up   |
| 6516771 | 7034353 | 972139  | --- | --- | --- | 1,24 | up   |
| 6516863 | 7365183 | 1781908 | --- | --- | --- | 1,03 | down |
| 6516894 | 7364346 | 1779970 | --- | --- | --- | 1,09 | down |
| 6517127 | 7327169 | 1688466 | --- | --- | --- | 1,13 | down |
| 6517129 | 7292517 | 1602550 | --- | --- | --- | 2,06 | up   |
| 6517203 | 7086966 | 1095243 | --- | --- | --- | 1,02 | up   |
| 6517212 | 7338807 | 1716828 | --- | --- | --- | 1,25 | down |
| 6517244 | 7228520 | 1443760 | --- | --- | --- | 1,21 | up   |
| 6517306 | 7258520 | 1518875 | --- | --- | --- | 1,07 | down |
| 6517351 | 7198644 | 1372351 | --- | --- | --- | 1,11 | down |
| 6517405 | 7239939 | 1473783 | --- | --- | --- | 1,07 | up   |
| 6517473 | 7321414 | 1675638 | --- | --- | --- | 1,13 | up   |
| 6517495 | 7075445 | 1069355 | --- | --- | --- | 1,52 | down |
| 6517523 | 7360486 | 1771025 | --- | --- | --- | 1,17 | up   |
| 6517530 | 7337260 | 1712803 | --- | --- | --- | 1,12 | down |
| 6517636 | 7049399 | 1008408 | --- | --- | --- | 1,78 | up   |
| 6517656 | 7384365 | 1830281 | --- | --- | --- | 1,12 | down |
| 6517761 | 7033504 | 969863  | --- | --- | --- | 1,18 | up   |
| 6517859 | 7295410 | 1609780 | --- | --- | --- | 2,09 | down |
| 6517985 | 7096859 | 1119332 | --- | --- | --- | 1,26 | up   |
| 6518053 | 7101258 | 1130564 | --- | --- | --- | 2,46 | down |
| 6518094 | 7285239 | 1585482 | --- | --- | --- | 1,39 | down |
| 6518169 | 7363768 | 1778603 | --- | --- | --- | 1,75 | down |
| 6518331 | 7233012 | 1455424 | --- | --- | --- | 1,08 | up   |
| 6518351 | 7069253 | 1054161 | --- | --- | --- | 1,33 | down |
| 6518375 | 7261668 | 1526981 | --- | --- | --- | 2,42 | up   |
| 6518451 | 7099294 | 1126105 | --- | --- | --- | 1,36 | up   |
| 6518456 | 7170764 | 1301434 | --- | --- | --- | 1,22 | up   |
| 6518524 | 7199476 | 1374538 | --- | --- | --- | 1,01 | down |
| 6518538 | 7288095 | 1592077 | --- | --- | --- | 1,76 | down |
| 6518576 | 7314115 | 1657313 | --- | --- | --- | 1,55 | up   |
| 6518683 | 7127257 | 1194812 | --- | --- | --- | 1,17 | down |
| 6518779 | 7186688 | 1341842 | --- | --- | --- | 1,24 | down |
| 6518886 | 7352100 | 1750189 | --- | --- | --- | 1,79 | up   |
| 6518976 | 7213908 | 1407692 | --- | --- | --- | 2,16 | up   |
| 6518978 | 7190524 | 1351184 | --- | --- | --- | 1,68 | up   |
| 6519098 | 7065823 | 1045714 | --- | --- | --- | 1,25 | down |
| 6519103 | 7353712 | 1753945 | --- | --- | --- | 1,05 | up   |
| 6519487 | 7067556 | 1050037 | --- | --- | --- | 1,51 | down |
| 6519492 | 7085848 | 1092422 | --- | --- | --- | 1,00 | down |
| 6519494 | 7264274 | 1533174 | --- | --- | --- | 1,95 | down |
| 6519518 | 7166439 | 1290093 | --- | --- | --- | 1,05 | up   |

|         |         |         |     |     |     |      |      |
|---------|---------|---------|-----|-----|-----|------|------|
| 6519563 | 7139708 | 1225057 | --- | --- | --- | 1,32 | up   |
| 6519569 | 7374842 | 1808983 | --- | --- | --- | 2,07 | down |
| 6519669 | 7258323 | 1518474 | --- | --- | --- | 6,43 | down |
| 6519747 | 7362184 | 1774822 | --- | --- | --- | 1,16 | down |
| 6519780 | 7065827 | 1045721 | --- | --- | --- | 1,01 | up   |
| 6519796 | 7276650 | 1564133 | --- | --- | --- | 1,01 | up   |
| 6519882 | 7096859 | 1119310 | --- | --- | --- | 1,21 | up   |
| 6519965 | 7033337 | 969482  | --- | --- | --- | 1,19 | down |
| 6520058 | 7031774 | 964650  | --- | --- | --- | 1,88 | down |
| 6520139 | 7181193 | 1328294 | --- | --- | --- | 1,63 | up   |
| 6520216 | 7131360 | 1204988 | --- | --- | --- | 1,08 | down |
| 6520220 | 7125160 | 1189586 | --- | --- | --- | 1,20 | up   |
| 6520280 | 7156044 | 1265714 | --- | --- | --- | 1,02 | down |
| 6520312 | 7169573 | 1298391 | --- | --- | --- | 1,04 | down |
| 6520329 | 7139026 | 1223503 | --- | --- | --- | 1,15 | down |
| 6520451 | 7201217 | 1378776 | --- | --- | --- | 1,16 | down |
| 6520471 | 7132024 | 1206341 | --- | --- | --- | 1,61 | down |
| 6520497 | 7249503 | 1496213 | --- | --- | --- | 1,51 | down |
| 6520606 | 7297589 | 1615687 | --- | --- | --- | 1,87 | down |
| 6520615 | 7271213 | 1550651 | --- | --- | --- | 1,08 | up   |
| 6520664 | 7338807 | 1716817 | --- | --- | --- | 1,09 | up   |
| 6520681 | 7337260 | 1712795 | --- | --- | --- | 1,02 | down |
| 6520704 | 7323545 | 1679949 | --- | --- | --- | 1,28 | up   |
| 6520758 | 7103811 | 1137062 | --- | --- | --- | 1,01 | up   |
| 6520941 | 7142081 | 1230961 | --- | --- | --- | 1,09 | up   |
| 6520974 | 7156372 | 1266707 | --- | --- | --- | 1,10 | down |
| 6521036 | 7096924 | 1119604 | --- | --- | --- | 1,00 | up   |
| 6521085 | 7264797 | 1534423 | --- | --- | --- | 1,00 | up   |
| 6521091 | 7365183 | 1781913 | --- | --- | --- | 1,05 | down |
| 6521126 | 7384073 | 1829473 | --- | --- | --- | 1,37 | down |
| 6521135 | 7059766 | 1030982 | --- | --- | --- | 1,51 | down |
| 6521198 | 7336931 | 1711872 | --- | --- | --- | 2,27 | down |
| 6521308 | 7377583 | 1815453 | --- | --- | --- | 1,44 | up   |
| 6521369 | 7059375 | 1030072 | --- | --- | --- | 1,24 | up   |
| 6521434 | 7271008 | 1549945 | --- | --- | --- | 1,09 | up   |
| 6521558 | 7193513 | 1359449 | --- | --- | --- | 2,06 | down |
| 6521705 | 7280743 | 1574498 | --- | --- | --- | 1,08 | up   |
| 6521749 | 7076160 | 1070908 | --- | --- | --- | 1,23 | down |
| 6521834 | 7033672 | 970367  | --- | --- | --- | 1,71 | up   |
| 6521876 | 7330727 | 1697143 | --- | --- | --- | 1,11 | up   |
| 6521950 | 7276650 | 1564110 | --- | --- | --- | 1,13 | up   |
| 6521952 | 7060851 | 1033402 | --- | --- | --- | 1,02 | up   |
| 6522143 | 7236395 | 1464325 | --- | --- | --- | 1,32 | up   |
| 6522152 | 7180620 | 1326386 | --- | --- | --- | 1,46 | down |
| 6522193 | 7091954 | 1107703 | --- | --- | --- | 1,31 | up   |
| 6522255 | 7095021 | 1115131 | --- | --- | --- | 1,11 | up   |
| 6522407 | 7111066 | 1154969 | --- | --- | --- | 1,49 | up   |
| 6522470 | 7176456 | 1315834 | --- | --- | --- | 1,40 | up   |
| 6522500 | 7374842 | 1808978 | --- | --- | --- | 1,17 | up   |
| 6522585 | 7136062 | 1216294 | --- | --- | --- | 1,18 | up   |
| 6522602 | 7092549 | 1109121 | --- | --- | --- | 3,31 | up   |
| 6522614 | 7097454 | 1120875 | --- | --- | --- | 1,08 | down |
| 6522738 | 7229886 | 1447153 | --- | --- | --- | 1,38 | up   |
| 6522856 | 7236395 | 1464319 | --- | --- | --- | 1,43 | down |
| 6522857 | 7298692 | 1618407 | --- | --- | --- | 1,05 | down |
| 6522976 | 7311218 | 1650356 | --- | --- | --- | 1,07 | up   |

|         |         |         |     |     |     |      |      |
|---------|---------|---------|-----|-----|-----|------|------|
| 6523002 | 7314270 | 1657722 | --- | --- | --- | 1,15 | up   |
| 6523051 | 7376566 | 1812868 | --- | --- | --- | 1,09 | down |
| 6523200 | 7174114 | 1310421 | --- | --- | --- | 1,47 | up   |
| 6523215 | 7034293 | 971994  | --- | --- | --- | 3,56 | up   |
| 6523261 | 7087282 | 1096171 | --- | --- | --- | 1,27 | down |
| 6523272 | 7079905 | 1079341 | --- | --- | --- | 1,11 | up   |
| 6523284 | 7111427 | 1155764 | --- | --- | --- | 1,26 | up   |
| 6523285 | 7049399 | 1008334 | --- | --- | --- | 1,06 | up   |
| 6523394 | 7112225 | 1157538 | --- | --- | --- | 1,04 | down |
| 6523506 | 7368004 | 1789333 | --- | --- | --- | 1,04 | down |
| 6523509 | 7068259 | 1051613 | --- | --- | --- | 1,20 | down |
| 6523642 | 7031774 | 964735  | --- | --- | --- | 1,26 | down |
| 6523730 | 7069253 | 1054152 | --- | --- | --- | 1,25 | up   |
| 6523739 | 7193056 | 1358275 | --- | --- | --- | 1,35 | up   |
| 6523780 | 7136062 | 1216295 | --- | --- | --- | 1,18 | down |
| 6523806 | 7281507 | 1576682 | --- | --- | --- | 1,49 | down |
| 6523871 | 7188829 | 1346655 | --- | --- | --- | 1,23 | down |
| 6523935 | 7340990 | 1722507 | --- | --- | --- | 1,03 | up   |
| 6523998 | 7264274 | 1533172 | --- | --- | --- | 1,35 | up   |
| 6524153 | 7049689 | 1008873 | --- | --- | --- | 1,71 | down |
| 6524183 | 7113483 | 1161009 | --- | --- | --- | 1,06 | up   |
| 6524486 | 7082098 | 1084112 | --- | --- | --- | 1,13 | up   |
| 6524538 | 7038316 | 981460  | --- | --- | --- | 1,50 | up   |
| 6524549 | 7236358 | 1464221 | --- | --- | --- | 1,05 | down |
| 6524561 | 7254040 | 1507613 | --- | --- | --- | 1,12 | down |
| 6524575 | 7210600 | 1400528 | --- | --- | --- | 1,02 | down |
| 6524746 | 7057277 | 1025525 | --- | --- | --- | 1,46 | down |
| 6524791 | 7068259 | 1051643 | --- | --- | --- | 1,24 | up   |
| 6524932 | 7367990 | 1789220 | --- | --- | --- | 1,30 | down |
| 6524952 | 7072608 | 1062297 | --- | --- | --- | 2,00 | up   |
| 6524965 | 7337224 | 1712621 | --- | --- | --- | 1,28 | down |
| 6525098 | 7094139 | 1112921 | --- | --- | --- | 1,03 | up   |
| 6525313 | 7201217 | 1378776 | --- | --- | --- | 1,13 | down |
| 6525415 | 7146093 | 1240914 | --- | --- | --- | 1,52 | up   |
| 6525445 | 7267953 | 1542265 | --- | --- | --- | 1,63 | up   |
| 6525511 | 7072765 | 1062750 | --- | --- | --- | 1,17 | down |
| 6525609 | 7068259 | 1051593 | --- | --- | --- | 1,70 | up   |
| 6525643 | 7166497 | 1290382 | --- | --- | --- | 1,07 | down |
| 6525644 | 7049399 | 1008389 | --- | --- | --- | 2,04 | down |
| 6525851 | 7249503 | 1496175 | --- | --- | --- | 1,10 | down |
| 6525879 | 7031774 | 964769  | --- | --- | --- | 1,31 | down |
| 6525885 | 7065655 | 1045252 | --- | --- | --- | 1,11 | down |
| 6525890 | 7339379 | 1718315 | --- | --- | --- | 1,13 | up   |
| 6525972 | 7041609 | 989571  | --- | --- | --- | 1,01 | down |
| 6525981 | 7344406 | 1731221 | --- | --- | --- | 1,24 | up   |
| 6526071 | 7170764 | 1301470 | --- | --- | --- | 1,06 | down |
| 6526096 | 7340304 | 1720863 | --- | --- | --- | 2,06 | down |
| 6526099 | 7236726 | 1465056 | --- | --- | --- | 1,04 | up   |
| 6526167 | 7340990 | 1722505 | --- | --- | --- | 1,08 | up   |
| 6526173 | 7077170 | 1073573 | --- | --- | --- | 1,43 | down |
| 6526182 | 7133181 | 1209153 | --- | --- | --- | 1,15 | up   |
| 6526304 | 7043535 | 994132  | --- | --- | --- | 1,46 | down |
| 6526317 | 7339379 | 1718361 | --- | --- | --- | 1,35 | down |
| 6526377 | 7036412 | 976855  | --- | --- | --- | 1,20 | up   |
| 6526430 | 7340057 | 1720326 | --- | --- | --- | 1,24 | down |
| 6526525 | 7308679 | 1644238 | --- | --- | --- | 1,97 | down |

|         |         |         |     |     |     |      |      |
|---------|---------|---------|-----|-----|-----|------|------|
| 6526725 | 7384904 | 1831602 | --- | --- | --- | 1,16 | down |
| 6526802 | 7217650 | 1417188 | --- | --- | --- | 1,22 | up   |
| 6526892 | 7363922 | 1778870 | --- | --- | --- | 1,11 | down |
| 6527026 | 7073854 | 1065635 | --- | --- | --- | 1,10 | down |
| 6527028 | 7228848 | 1444755 | --- | --- | --- | 1,06 | up   |
| 6527065 | 7084716 | 1090118 | --- | --- | --- | 1,11 | down |
| 6527123 | 7238202 | 1468950 | --- | --- | --- | 1,26 | down |
| 6527124 | 7193056 | 1358254 | --- | --- | --- | 1,06 | down |
| 6527277 | 7353712 | 1753944 | --- | --- | --- | 1,23 | down |
| 6527379 | 7087965 | 1098033 | --- | --- | --- | 1,11 | up   |
| 6527410 | 7243647 | 1482462 | --- | --- | --- | 1,07 | up   |
| 6527449 | 7373633 | 1805703 | --- | --- | --- | 1,03 | up   |
| 6527454 | 7154655 | 1262319 | --- | --- | --- | 1,73 | up   |
| 6527507 | 7060851 | 1033436 | --- | --- | --- | 1,13 | down |
| 6527550 | 7025652 | 950238  | --- | --- | --- | 1,22 | down |
| 6527626 | 7112225 | 1157555 | --- | --- | --- | 1,85 | down |
| 6527702 | 7289909 | 1596509 | --- | --- | --- | 1,19 | up   |
| 6527740 | 7031774 | 964782  | --- | --- | --- | 1,10 | down |
| 6527755 | 7247848 | 1492049 | --- | --- | --- | 1,64 | down |
| 6527763 | 7225553 | 1435971 | --- | --- | --- | 1,08 | up   |
| 6527772 | 7096898 | 1119521 | --- | --- | --- | 1,68 | down |
| 6527976 | 7068259 | 1051663 | --- | --- | --- | 1,77 | up   |
| 6528029 | 7184981 | 1337839 | --- | --- | --- | 1,42 | down |
| 6528169 | 7210600 | 1400521 | --- | --- | --- | 1,03 | up   |
| 6528186 | 7040260 | 986073  | --- | --- | --- | 1,24 | down |
| 6528209 | 7344406 | 1731191 | --- | --- | --- | 1,49 | down |
| 6528229 | 7374740 | 1808636 | --- | --- | --- | 1,42 | down |
| 6528231 | 7322260 | 1677076 | --- | --- | --- | 1,01 | up   |
| 6528333 | 7094139 | 1112894 | --- | --- | --- | 1,10 | down |
| 6528392 | 7243130 | 1480843 | --- | --- | --- | 1,05 | up   |
| 6528456 | 7316644 | 1663984 | --- | --- | --- | 1,29 | up   |
| 6528507 | 7180687 | 1326630 | --- | --- | --- | 2,00 | up   |
| 6528614 | 7337845 | 1714341 | --- | --- | --- | 1,13 | up   |
| 6528899 | 7236358 | 1464221 | --- | --- | --- | 1,49 | down |
| 6529058 | 7095021 | 1115131 | --- | --- | --- | 1,52 | up   |
| 6529095 | 7167700 | 1293602 | --- | --- | --- | 1,09 | up   |
| 6529201 | 7337224 | 1712608 | --- | --- | --- | 1,61 | down |
| 6529263 | 7321414 | 1675639 | --- | --- | --- | 1,27 | up   |
| 6529277 | 7352044 | 1750011 | --- | --- | --- | 1,02 | up   |
| 6529343 | 7115362 | 1165594 | --- | --- | --- | 1,20 | down |
| 6529426 | 7330727 | 1697142 | --- | --- | --- | 1,06 | up   |
| 6529615 | 7271008 | 1549945 | --- | --- | --- | 1,28 | up   |
| 6529628 | 7267380 | 1540445 | --- | --- | --- | 1,04 | down |
| 6529744 | 7123421 | 1185843 | --- | --- | --- | 1,45 | up   |
| 6529746 | 7233440 | 1456930 | --- | --- | --- | 1,03 | down |
| 6529772 | 7038610 | 982091  | --- | --- | --- | 1,12 | down |
| 6529834 | 7240224 | 1474396 | --- | --- | --- | 1,02 | up   |
| 6529865 | 7031183 | 963236  | --- | --- | --- | 1,36 | down |
| 6529947 | 7096873 | 1119374 | --- | --- | --- | 1,52 | down |
| 6530206 | 7132125 | 1206598 | --- | --- | --- | 1,34 | down |
| 6530466 | 7292517 | 1602560 | --- | --- | --- | 1,03 | down |
| 6530493 | 7260553 | 1524111 | --- | --- | --- | 1,04 | up   |
| 6530635 | 7249503 | 1496211 | --- | --- | --- | 2,18 | down |
| 6530682 | 7069830 | 1055649 | --- | --- | --- | 1,04 | down |
| 6530711 | 7253408 | 1505943 | --- | --- | --- | 1,39 | down |
| 6530803 | 7231203 | 1450443 | --- | --- | --- | 2,17 | down |

|         |         |         |     |     |     |      |      |
|---------|---------|---------|-----|-----|-----|------|------|
| 6530957 | 7139026 | 1223502 | --- | --- | --- | 1,02 | up   |
| 6530989 | 7336727 | 1711289 | --- | --- | --- | 1,24 | up   |
| 6530990 | 7210387 | 1400036 | --- | --- | --- | 1,25 | down |
| 6531132 | 7170764 | 1301474 | --- | --- | --- | 1,01 | up   |
| 6531229 | 7060851 | 1033372 | --- | --- | --- | 1,10 | down |
| 6531414 | 7297154 | 1614258 | --- | --- | --- | 1,05 | down |
| 6531661 | 7152038 | 1255398 | --- | --- | --- | 1,05 | down |
| 6531827 | 7043379 | 993637  | --- | --- | --- | 1,72 | up   |
| 6531873 | 7266706 | 1538743 | --- | --- | --- | 1,10 | up   |
| 6532004 | 7339379 | 1718342 | --- | --- | --- | 1,10 | down |
| 6532117 | 7058713 | 1028660 | --- | --- | --- | 1,00 | down |
| 6532271 | 7147809 | 1245457 | --- | --- | --- | 1,00 | down |
| 6532346 | 7052385 | 1014777 | --- | --- | --- | 1,04 | up   |
| 6532350 | 7367971 | 1789134 | --- | --- | --- | 1,27 | up   |
| 6532361 | 7041609 | 989593  | --- | --- | --- | 1,07 | up   |
| 6532364 | 7369043 | 1793106 | --- | --- | --- | 2,03 | down |
| 6532396 | 7380497 | 1821854 | --- | --- | --- | 1,01 | down |
| 6532398 | 7364346 | 1780016 | --- | --- | --- | 1,23 | down |
| 6532465 | 7237719 | 1467535 | --- | --- | --- | 1,06 | up   |
| 6532466 | 7231775 | 1452122 | --- | --- | --- | 1,31 | up   |
| 6532604 | 7068259 | 1051603 | --- | --- | --- | 1,17 | up   |
| 6532651 | 7067828 | 1050785 | --- | --- | --- | 1,01 | down |
| 6532704 | 7260613 | 1524282 | --- | --- | --- | 1,12 | down |
| 6532960 | 7159642 | 1274217 | --- | --- | --- | 1,01 | up   |
| 6533014 | 7027795 | 956272  | --- | --- | --- | 1,03 | up   |
| 6533245 | 7343122 | 1727740 | --- | --- | --- | 1,20 | down |
| 6533259 | 7174149 | 1310492 | --- | --- | --- | 1,00 | up   |
| 6533313 | 7330238 | 1695964 | --- | --- | --- | 1,37 | down |
| 6533421 | 7286807 | 1588788 | --- | --- | --- | 1,86 | down |
| 6533556 | 7361420 | 1773051 | --- | --- | --- | 1,07 | up   |
| 6533560 | 7167876 | 1294050 | --- | --- | --- | 1,12 | up   |
| 6533570 | 7372840 | 1803759 | --- | --- | --- | 1,59 | up   |
| 6533672 | 7145669 | 1240015 | --- | --- | --- | 1,25 | up   |
| 6533676 | 7239939 | 1473787 | --- | --- | --- | 1,28 | down |
| 6533704 | 7069464 | 1054667 | --- | --- | --- | 1,11 | up   |
| 6533723 | 7054636 | 1019872 | --- | --- | --- | 1,06 | up   |
| 6533857 | 7145669 | 1240006 | --- | --- | --- | 1,19 | down |
| 6533862 | 7319937 | 1672271 | --- | --- | --- | 1,61 | down |
| 6533910 | 7234195 | 1458979 | --- | --- | --- | 1,07 | down |
| 6534047 | 7123357 | 1185606 | --- | --- | --- | 1,07 | up   |
| 6534051 | 7384365 | 1830271 | --- | --- | --- | 1,33 | down |
| 6534240 | 7088489 | 1099514 | --- | --- | --- | 1,07 | down |
| 6534241 | 7373038 | 1804278 | --- | --- | --- | 1,42 | up   |
| 6534298 | 7336250 | 1710171 | --- | --- | --- | 1,12 | down |
| 6534310 | 7112225 | 1157605 | --- | --- | --- | 1,06 | down |
| 6534358 | 7059020 | 1029353 | --- | --- | --- | 1,30 | up   |
| 6534385 | 7373678 | 1805868 | --- | --- | --- | 1,20 | up   |
| 6534405 | 7180861 | 1327224 | --- | --- | --- | 1,48 | down |
| 6534532 | 7274892 | 1559544 | --- | --- | --- | 1,25 | down |
| 6534534 | 7347396 | 1738527 | --- | --- | --- | 1,18 | up   |
| 6534731 | 7211363 | 1402056 | --- | --- | --- | 1,09 | down |
| 6534822 | 7183182 | 1333553 | --- | --- | --- | 2,06 | down |
| 6534919 | 7231835 | 1452294 | --- | --- | --- | 2,14 | up   |
| 6535054 | 7267802 | 1541743 | --- | --- | --- | 1,25 | down |
| 6535254 | 7072332 | 1061647 | --- | --- | --- | 1,27 | up   |
| 6535288 | 7068086 | 1051201 | --- | --- | --- | 1,15 | up   |

|         |         |         |     |     |     |      |      |
|---------|---------|---------|-----|-----|-----|------|------|
| 6535329 | 7199476 | 1374547 | --- | --- | --- | 1,18 | down |
| 6535358 | 7263152 | 1530363 | --- | --- | --- | 2,26 | down |
| 6535626 | 7352252 | 1750567 | --- | --- | --- | 1,44 | down |
| 6535753 | 7217269 | 1415907 | --- | --- | --- | 1,15 | down |
| 6535764 | 7173863 | 1309701 | --- | --- | --- | 1,17 | up   |
| 6536074 | 7136062 | 1216292 | --- | --- | --- | 1,17 | up   |
| 6536133 | 7329846 | 1694987 | --- | --- | --- | 1,14 | up   |
| 6536167 | 7189689 | 1349031 | --- | --- | --- | 1,37 | up   |
| 6536190 | 7254088 | 1507733 | --- | --- | --- | 1,11 | down |
| 6536235 | 7372840 | 1803770 | --- | --- | --- | 1,17 | up   |
| 6536362 | 7131889 | 1206087 | --- | --- | --- | 1,84 | up   |
| 6536412 | 7049689 | 1008871 | --- | --- | --- | 1,22 | up   |
| 6536427 | 7033672 | 970358  | --- | --- | --- | 1,02 | down |
| 6536478 | 7034532 | 972654  | --- | --- | --- | 1,05 | up   |
| 6536489 | 7162144 | 1280504 | --- | --- | --- | 1,26 | up   |
| 6536495 | 7247228 | 1490513 | --- | --- | --- | 1,54 | down |
| 6536533 | 7092549 | 1109187 | --- | --- | --- | 1,51 | down |
| 6536575 | 7027797 | 956286  | --- | --- | --- | 2,25 | up   |
| 6536722 | 7340990 | 1722514 | --- | --- | --- | 1,07 | down |
| 6536729 | 7190582 | 1351393 | --- | --- | --- | 1,18 | down |
| 6536785 | 7225553 | 1435973 | --- | --- | --- | 1,08 | down |
| 6536875 | 7323545 | 1679982 | --- | --- | --- | 1,69 | up   |
| 6537024 | 7198210 | 1370950 | --- | --- | --- | 1,65 | up   |
| 6537251 | 7380497 | 1821821 | --- | --- | --- | 1,26 | up   |
| 6537262 | 7025652 | 950341  | --- | --- | --- | 1,22 | down |
| 6537371 | 7101400 | 1130908 | --- | --- | --- | 1,57 | down |
| 6537598 | 7276762 | 1564484 | --- | --- | --- | 1,05 | up   |
| 6537652 | 7369043 | 1793101 | --- | --- | --- | 1,12 | up   |
| 6537700 | 7339379 | 1718361 | --- | --- | --- | 1,60 | down |
| 6537810 | 7249503 | 1496196 | --- | --- | --- | 1,12 | up   |
| 6537873 | 7268375 | 1543437 | --- | --- | --- | 2,33 | down |
| 6538060 | 7253088 | 1505111 | --- | --- | --- | 1,61 | up   |
| 6538205 | 7033616 | 970211  | --- | --- | --- | 1,74 | down |
| 6538211 | 7234040 | 1458505 | --- | --- | --- | 1,51 | up   |
| 6538216 | 7341646 | 1724194 | --- | --- | --- | 1,52 | down |
| 6538284 | 7300446 | 1622876 | --- | --- | --- | 1,36 | up   |
| 6538297 | 7170764 | 1301427 | --- | --- | --- | 1,13 | up   |
| 6538373 | 7214605 | 1409365 | --- | --- | --- | 1,21 | down |
| 6538459 | 7189574 | 1348710 | --- | --- | --- | 1,33 | down |
| 6538479 | 7100307 | 1128385 | --- | --- | --- | 1,38 | down |
| 6538642 | 7200129 | 1375994 | --- | --- | --- | 2,83 | up   |
| 6538668 | 7107066 | 1144778 | --- | --- | --- | 1,17 | up   |
| 6538895 | 7217679 | 1417301 | --- | --- | --- | 1,05 | down |
| 6538923 | 7303616 | 1631361 | --- | --- | --- | 1,31 | down |
| 6538928 | 7336250 | 1710171 | --- | --- | --- | 1,08 | down |
| 6538978 | 7049399 | 1008423 | --- | --- | --- | 1,03 | up   |
| 6539036 | 7098077 | 1122785 | --- | --- | --- | 1,25 | down |
| 6539054 | 7323545 | 1679983 | --- | --- | --- | 1,05 | up   |
| 6539060 | 7148978 | 1248497 | --- | --- | --- | 1,10 | down |
| 6539097 | 7070869 | 1058491 | --- | --- | --- | 1,01 | up   |
| 6539123 | 7276231 | 1563109 | --- | --- | --- | 1,17 | up   |
| 6539186 | 7376820 | 1813443 | --- | --- | --- | 1,43 | down |
| 6539243 | 7100257 | 1128278 | --- | --- | --- | 5,19 | down |
| 6539373 | 7284359 | 1583439 | --- | --- | --- | 1,43 | up   |
| 6539528 | 7374143 | 1807009 | --- | --- | --- | 1,43 | up   |
| 6539683 | 7037806 | 980202  | --- | --- | --- | 1,40 | down |



|         |         |         |     |     |     |      |      |
|---------|---------|---------|-----|-----|-----|------|------|
| 6539729 | 7098126 | 1122977 | --- | --- | --- | 1,43 | down |
| 6539800 | 7145669 | 1240001 | --- | --- | --- | 1,29 | down |
| 6539912 | 7108345 | 1148071 | --- | --- | --- | 1,10 | down |
| 6540095 | 7125160 | 1189564 | --- | --- | --- | 1,14 | down |
| 6540110 | 7341002 | 1722556 | --- | --- | --- | 1,11 | up   |
| 6540147 | 7084193 | 1089088 | --- | --- | --- | 1,45 | up   |
| 6540156 | 7065655 | 1045269 | --- | --- | --- | 1,08 | down |
| 6540162 | 7247954 | 1492402 | --- | --- | --- | 1,28 | down |
| 6540189 | 7307349 | 1640980 | --- | --- | --- | 1,40 | up   |
| 6540219 | 7167883 | 1294108 | --- | --- | --- | 1,80 | down |
| 6540301 | 7378996 | 1818614 | --- | --- | --- | 2,46 | down |
| 6540337 | 7146093 | 1240913 | --- | --- | --- | 1,20 | up   |
| 6540350 | 7326612 | 1687198 | --- | --- | --- | 1,82 | down |
| 6540396 | 7067670 | 1050314 | --- | --- | --- | 2,06 | up   |
| 6540442 | 7123357 | 1185602 | --- | --- | --- | 1,01 | up   |
| 6540553 | 7341253 | 1723268 | --- | --- | --- | 1,01 | up   |
| 6540734 | 7364346 | 1779991 | --- | --- | --- | 2,17 | up   |
| 6540810 | 7355220 | 1758094 | --- | --- | --- | 1,04 | down |
| 6540833 | 7225553 | 1435987 | --- | --- | --- | 1,06 | up   |
| 6541027 | 7351951 | 1749849 | --- | --- | --- | 1,14 | down |
| 6541074 | 7098867 | 1124952 | --- | --- | --- | 1,37 | up   |
| 6541149 | 7169599 | 1298453 | --- | --- | --- | 1,68 | up   |
| 6541177 | 7173863 | 1309701 | --- | --- | --- | 1,02 | down |
| 6541249 | 7243130 | 1480884 | --- | --- | --- | 1,11 | up   |
| 6541359 | 7060851 | 1033435 | --- | --- | --- | 1,63 | up   |
| 6541506 | 7025652 | 950307  | --- | --- | --- | 1,01 | down |
| 6541519 | 7188685 | 1346317 | --- | --- | --- | 1,23 | down |
| 6541597 | 7031774 | 964736  | --- | --- | --- | 1,49 | down |
| 6541653 | 7031774 | 964759  | --- | --- | --- | 1,15 | down |
| 6541703 | 7127540 | 1195282 | --- | --- | --- | 1,00 | up   |
| 6541712 | 7139708 | 1225054 | --- | --- | --- | 1,04 | down |
| 6541816 | 7052385 | 1014774 | --- | --- | --- | 1,03 | down |
| 6541828 | 7156372 | 1266712 | --- | --- | --- | 1,26 | down |
| 6541833 | 7188138 | 1345048 | --- | --- | --- | 1,48 | down |
| 6541889 | 7297589 | 1615663 | --- | --- | --- | 1,42 | up   |
| 6541994 | 7133612 | 1210270 | --- | --- | --- | 1,18 | up   |
| 6542005 | 7162144 | 1280499 | --- | --- | --- | 1,03 | down |
| 6542148 | 7380497 | 1821868 | --- | --- | --- | 1,30 | up   |
| 6542175 | 7037764 | 979996  | --- | --- | --- | 1,07 | down |
| 6542286 | 7052813 | 1015928 | --- | --- | --- | 1,05 | up   |
| 6542301 | 7373038 | 1804288 | --- | --- | --- | 1,31 | up   |
| 6542321 | 7067828 | 1050799 | --- | --- | --- | 1,30 | up   |
| 6542328 | 7314270 | 1657743 | --- | --- | --- | 1,08 | down |
| 6542380 | 7170764 | 1301486 | --- | --- | --- | 1,30 | up   |
| 6542406 | 7196187 | 1365960 | --- | --- | --- | 1,06 | up   |
| 6542479 | 7374143 | 1807014 | --- | --- | --- | 1,19 | up   |
| 6542500 | 7249503 | 1496182 | --- | --- | --- | 1,23 | up   |
| 6542505 | 7058713 | 1028657 | --- | --- | --- | 1,04 | down |
| 6542529 | 7067670 | 1050362 | --- | --- | --- | 1,12 | up   |
| 6542541 | 7346066 | 1735293 | --- | --- | --- | 1,01 | down |
| 6542640 | 7112225 | 1157535 | --- | --- | --- | 1,15 | down |
| 6542759 | 7276650 | 1564148 | --- | --- | --- | 1,02 | down |
| 6542760 | 7033337 | 969485  | --- | --- | --- | 1,69 | down |
| 6542783 | 7112225 | 1157566 | --- | --- | --- | 1,13 | up   |
| 6542919 | 7033504 | 969853  | --- | --- | --- | 1,75 | down |
| 6542947 | 7349804 | 1744567 | --- | --- | --- | 2,14 | down |

|         |         |         |     |     |     |      |      |
|---------|---------|---------|-----|-----|-----|------|------|
| 6543097 | 7237719 | 1467502 | --- | --- | --- | 1,18 | up   |
| 6543299 | 7341646 | 1724194 | --- | --- | --- | 1,04 | up   |
| 6543331 | 7236254 | 1464055 | --- | --- | --- | 2,14 | down |
| 6543358 | 7248790 | 1494530 | --- | --- | --- | 1,02 | down |
| 6543359 | 7067614 | 1050179 | --- | --- | --- | 1,83 | down |
| 6543445 | 7384365 | 1830281 | --- | --- | --- | 1,10 | down |
| 6543464 | 7083031 | 1086283 | --- | --- | --- | 1,36 | down |
| 6543560 | 7189669 | 1348984 | --- | --- | --- | 1,24 | up   |
| 6543607 | 7111066 | 1154965 | --- | --- | --- | 1,23 | down |
| 6543708 | 7195903 | 1365334 | --- | --- | --- | 1,16 | up   |
| 6543953 | 7339379 | 1718349 | --- | --- | --- | 1,13 | up   |
| 6544003 | 7332059 | 1700726 | --- | --- | --- | 1,14 | down |
| 6544012 | 7286807 | 1588801 | --- | --- | --- | 1,61 | down |
| 6544075 | 7337845 | 1714332 | --- | --- | --- | 1,25 | up   |
| 6544334 | 7181105 | 1327962 | --- | --- | --- | 1,39 | up   |
| 6544385 | 7373678 | 1805860 | --- | --- | --- | 1,45 | down |
| 6544403 | 7331237 | 1698719 | --- | --- | --- | 1,06 | down |
| 6544420 | 7108345 | 1148078 | --- | --- | --- | 1,26 | down |
| 6544760 | 7236395 | 1464340 | --- | --- | --- | 1,33 | up   |
| 6544792 | 7186464 | 1341384 | --- | --- | --- | 1,26 | down |
| 6544905 | 7339379 | 1718357 | --- | --- | --- | 1,42 | up   |
| 6544962 | 7070836 | 1058341 | --- | --- | --- | 2,30 | down |
| 6544974 | 7265259 | 1535443 | --- | --- | --- | 1,39 | up   |
| 6545080 | 7230611 | 1448824 | --- | --- | --- | 1,13 | up   |
| 6545104 | 7330727 | 1697154 | --- | --- | --- | 1,06 | up   |
| 6545257 | 7301900 | 1626743 | --- | --- | --- | 1,18 | up   |
| 6545281 | 7102369 | 1133413 | --- | --- | --- | 1,17 | up   |
| 6545332 | 7209927 | 1398924 | --- | --- | --- | 1,14 | up   |
| 6545463 | 7186443 | 1341313 | --- | --- | --- | 1,21 | up   |
| 6545515 | 7224166 | 1432685 | --- | --- | --- | 1,48 | up   |
| 6545609 | 7197056 | 1367833 | --- | --- | --- | 1,43 | down |
| 6545632 | 7319937 | 1672289 | --- | --- | --- | 1,12 | up   |
| 6545650 | 7188829 | 1346663 | --- | --- | --- | 1,04 | up   |
| 6545651 | 7236254 | 1464058 | --- | --- | --- | 1,76 | up   |
| 6545861 | 7318631 | 1669023 | --- | --- | --- | 1,01 | up   |
| 6545870 | 7052385 | 1014781 | --- | --- | --- | 1,16 | up   |
| 6545874 | 7287337 | 1589971 | --- | --- | --- | 1,79 | down |
| 6545913 | 7316452 | 1663557 | --- | --- | --- | 1,53 | up   |
| 6545942 | 7343122 | 1727725 | --- | --- | --- | 2,09 | up   |
| 6545957 | 7101400 | 1130910 | --- | --- | --- | 1,01 | down |
| 6546070 | 7373417 | 1805093 | --- | --- | --- | 1,12 | up   |
| 6546232 | 7342356 | 1725906 | --- | --- | --- | 2,26 | up   |
| 6546285 | 7349804 | 1744566 | --- | --- | --- | 1,28 | up   |
| 6546406 | 7186106 | 1340487 | --- | --- | --- | 1,56 | down |
| 6546492 | 7340304 | 1720853 | --- | --- | --- | 2,52 | up   |
| 6546567 | 7258776 | 1519646 | --- | --- | --- | 1,02 | down |
| 6546570 | 7101643 | 1131566 | --- | --- | --- | 1,01 | up   |
| 6546583 | 7218728 | 1419926 | --- | --- | --- | 1,49 | up   |
| 6546634 | 7074989 | 1068381 | --- | --- | --- | 1,03 | down |
| 6546649 | 7037764 | 980039  | --- | --- | --- | 1,52 | up   |
| 6546707 | 7330181 | 1695696 | --- | --- | --- | 1,23 | down |
| 6546861 | 7101643 | 1131595 | --- | --- | --- | 1,46 | down |
| 6546928 | 7233440 | 1456887 | --- | --- | --- | 1,26 | up   |
| 6546985 | 7088723 | 1100135 | --- | --- | --- | 1,33 | down |
| 6547029 | 7373678 | 1805865 | --- | --- | --- | 1,39 | up   |
| 6547046 | 7156061 | 1265832 | --- | --- | --- | 1,35 | up   |

|         |         |         |     |     |     |      |      |
|---------|---------|---------|-----|-----|-----|------|------|
| 6547174 | 7049399 | 1008345 | --- | --- | --- | 1,07 | down |
| 6547401 | 7313411 | 1655422 | --- | --- | --- | 1,17 | up   |
| 6547466 | 7323560 | 1680080 | --- | --- | --- | 1,37 | down |
| 6547502 | 7176456 | 1315799 | --- | --- | --- | 1,11 | down |
| 6547570 | 7059375 | 1030056 | --- | --- | --- | 1,30 | up   |
| 6547769 | 7050930 | 1011619 | --- | --- | --- | 1,02 | up   |
| 6547803 | 7206133 | 1389979 | --- | --- | --- | 1,04 | down |
| 6547929 | 7373633 | 1805704 | --- | --- | --- | 1,69 | up   |
| 6547958 | 7081368 | 1082368 | --- | --- | --- | 1,43 | down |
| 6547972 | 7303616 | 1631315 | --- | --- | --- | 1,00 | down |
| 6548007 | 7341397 | 1723641 | --- | --- | --- | 1,13 | down |
| 6548073 | 7143904 | 1235800 | --- | --- | --- | 1,06 | up   |
| 6548199 | 7270574 | 1548527 | --- | --- | --- | 1,56 | up   |
| 6548604 | 7231775 | 1452121 | --- | --- | --- | 1,35 | down |
| 6548656 | 7071264 | 1059362 | --- | --- | --- | 1,49 | down |
| 6548905 | 7217650 | 1417192 | --- | --- | --- | 1,39 | up   |
| 6548913 | 7372840 | 1803756 | --- | --- | --- | 1,73 | up   |
| 6548927 | 7307424 | 1641137 | --- | --- | --- | 1,07 | down |
| 6549158 | 7192320 | 1356020 | --- | --- | --- | 1,08 | down |
| 6549242 | 7072754 | 1062674 | --- | --- | --- | 1,11 | down |
| 6549297 | 7058813 | 1028891 | --- | --- | --- | 1,33 | down |
| 6549377 | 7112225 | 1157551 | --- | --- | --- | 1,03 | up   |
| 6549459 | 7260613 | 1524280 | --- | --- | --- | 2,27 | down |
| 6549460 | 7101400 | 1130895 | --- | --- | --- | 1,07 | up   |
| 6549478 | 7030224 | 961132  | --- | --- | --- | 1,55 | down |
| 6549487 | 7156114 | 1266053 | --- | --- | --- | 1,06 | down |
| 6549595 | 7143455 | 1234722 | --- | --- | --- | 1,03 | down |
| 6549617 | 7189689 | 1349045 | --- | --- | --- | 1,04 | up   |
| 6549626 | 7195903 | 1365333 | --- | --- | --- | 1,02 | up   |
| 6549832 | 7365183 | 1781912 | --- | --- | --- | 1,07 | up   |
| 6549852 | 7132024 | 1206344 | --- | --- | --- | 1,01 | down |
| 6549854 | 7112225 | 1157534 | --- | --- | --- | 1,07 | down |
| 6549886 | 7088489 | 1099521 | --- | --- | --- | 1,13 | down |
| 6550056 | 7118196 | 1172695 | --- | --- | --- | 1,11 | down |
| 6550198 | 7279881 | 1572736 | --- | --- | --- | 1,74 | up   |
| 6550286 | 7331829 | 1700172 | --- | --- | --- | 1,65 | down |
| 6550291 | 7243130 | 1480942 | --- | --- | --- | 1,64 | up   |
| 6550424 | 7380497 | 1821833 | --- | --- | --- | 1,06 | up   |
| 6550539 | 7367990 | 1789224 | --- | --- | --- | 1,19 | up   |
| 6550545 | 7234195 | 1458975 | --- | --- | --- | 1,00 | down |
| 6550567 | 7221552 | 1426615 | --- | --- | --- | 1,21 | down |
| 6550669 | 7264085 | 1532719 | --- | --- | --- | 1,05 | up   |
| 6550676 | 7108551 | 1148697 | --- | --- | --- | 1,15 | up   |
| 6550803 | 7350237 | 1745489 | --- | --- | --- | 1,58 | up   |
| 6550833 | 7236358 | 1464256 | --- | --- | --- | 1,23 | down |
| 6550851 | 7185483 | 1338927 | --- | --- | --- | 1,18 | up   |
| 6550871 | 7331434 | 1699198 | --- | --- | --- | 1,23 | up   |
| 6550896 | 7201540 | 1379434 | --- | --- | --- | 1,39 | up   |
| 6551098 | 7249503 | 1496199 | --- | --- | --- | 1,08 | down |
| 6551119 | 7092965 | 1110195 | --- | --- | --- | 1,03 | up   |
| 6551166 | 7080131 | 1079793 | --- | --- | --- | 1,15 | down |
| 6551248 | 7096842 | 1119236 | --- | --- | --- | 1,06 | down |
| 6551380 | 7111361 | 1155580 | --- | --- | --- | 1,01 | up   |
| 6551434 | 7033672 | 970368  | --- | --- | --- | 1,02 | up   |
| 6551490 | 7155116 | 1263424 | --- | --- | --- | 2,17 | up   |
| 6551545 | 7183182 | 1333556 | --- | --- | --- | 1,24 | down |

|         |         |         |     |     |     |      |      |
|---------|---------|---------|-----|-----|-----|------|------|
| 6551591 | 7236395 | 1464341 | --- | --- | --- | 1,23 | up   |
| 6551605 | 7236395 | 1464336 | --- | --- | --- | 1,08 | down |
| 6551621 | 7242490 | 1479454 | --- | --- | --- | 1,27 | down |
| 6551694 | 7189574 | 1348690 | --- | --- | --- | 1,03 | down |
| 6551716 | 7373634 | 1805724 | --- | --- | --- | 1,29 | down |
| 6551817 | 7277783 | 1567450 | --- | --- | --- | 1,96 | down |
| 6551923 | 7132020 | 1206307 | --- | --- | --- | 1,21 | up   |
| 6551931 | 7154655 | 1262344 | --- | --- | --- | 1,57 | up   |
| 6551999 | 7070616 | 1057792 | --- | --- | --- | 1,22 | up   |
| 6552027 | 7340757 | 1721889 | --- | --- | --- | 1,69 | down |
| 6552037 | 7072332 | 1061645 | --- | --- | --- | 1,37 | up   |
| 6552039 | 7186688 | 1341839 | --- | --- | --- | 1,23 | down |
| 6552178 | 7334331 | 1705693 | --- | --- | --- | 1,08 | up   |
| 6552190 | 7170764 | 1301471 | --- | --- | --- | 1,02 | down |
| 6552206 | 7307485 | 1641383 | --- | --- | --- | 1,35 | down |
| 6552358 | 7042382 | 991294  | --- | --- | --- | 1,17 | up   |
| 6552359 | 7291853 | 1600977 | --- | --- | --- | 2,02 | down |
| 6552369 | 7339379 | 1718321 | --- | --- | --- | 1,25 | down |
| 6552379 | 7155116 | 1263438 | --- | --- | --- | 1,46 | up   |
| 6552466 | 7269314 | 1545614 | --- | --- | --- | 1,11 | down |
| 6552693 | 7339379 | 1718344 | --- | --- | --- | 1,30 | down |
| 6552803 | 7365183 | 1781905 | --- | --- | --- | 1,50 | down |
| 6552828 | 7052813 | 1015912 | --- | --- | --- | 1,11 | up   |
| 6552908 | 7273744 | 1556982 | --- | --- | --- | 1,87 | down |
| 6552964 | 7078273 | 1075822 | --- | --- | --- | 1,27 | up   |
| 6553025 | 7222221 | 1428072 | --- | --- | --- | 1,59 | down |
| 6553089 | 7145669 | 1240014 | --- | --- | --- | 1,48 | down |
| 6553114 | 7141061 | 1228644 | --- | --- | --- | 1,05 | up   |
| 6553147 | 7258520 | 1518892 | --- | --- | --- | 1,11 | down |
| 6553357 | 7052813 | 1015921 | --- | --- | --- | 1,36 | up   |
| 6553451 | 7384365 | 1830270 | --- | --- | --- | 1,55 | down |
| 6553492 | 7210599 | 1400510 | --- | --- | --- | 1,03 | up   |
| 6553499 | 7351951 | 1749815 | --- | --- | --- | 1,09 | up   |
| 6553636 | 7213945 | 1407831 | --- | --- | --- | 1,26 | down |
| 6553668 | 7243130 | 1480899 | --- | --- | --- | 1,53 | down |
| 6553693 | 7092965 | 1110199 | --- | --- | --- | 1,46 | up   |
| 6553720 | 7103782 | 1136947 | --- | --- | --- | 1,04 | up   |
| 6553760 | 7129841 | 1200834 | --- | --- | --- | 1,18 | down |
| 6553849 | 7069830 | 1055612 | --- | --- | --- | 1,06 | down |
| 6554288 | 7240569 | 1475480 | --- | --- | --- | 1,08 | down |
| 6554345 | 7217747 | 1417487 | --- | --- | --- | 1,31 | down |
| 6554376 | 7336931 | 1711872 | --- | --- | --- | 1,01 | up   |
| 6554413 | 7243603 | 1482293 | --- | --- | --- | 1,15 | up   |
| 6554475 | 7338807 | 1716807 | --- | --- | --- | 1,43 | down |
| 6554482 | 7034293 | 971914  | --- | --- | --- | 1,38 | up   |
| 6554487 | 7174149 | 1310496 | --- | --- | --- | 1,51 | down |
| 6554493 | 7359453 | 1768448 | --- | --- | --- | 1,69 | down |
| 6554555 | 7352100 | 1750203 | --- | --- | --- | 1,06 | down |
| 6554559 | 7069830 | 1055621 | --- | --- | --- | 1,11 | up   |
| 6554657 | 7344190 | 1730613 | --- | --- | --- | 1,36 | up   |
| 6554755 | 7047524 | 1004657 | --- | --- | --- | 1,18 | down |
| 6554759 | 7180687 | 1326625 | --- | --- | --- | 1,04 | up   |
| 6554832 | 7034293 | 971810  | --- | --- | --- | 4,03 | up   |
| 6554858 | 7200996 | 1378167 | --- | --- | --- | 1,26 | down |
| 6554861 | 7084193 | 1089047 | --- | --- | --- | 2,04 | down |
| 6554933 | 7127691 | 1195633 | --- | --- | --- | 1,01 | up   |

|         |         |         |     |     |     |      |      |
|---------|---------|---------|-----|-----|-----|------|------|
| 6554970 | 7345465 | 1733842 | --- | --- | --- | 2,29 | up   |
| 6554975 | 7312566 | 1653306 | --- | --- | --- | 1,08 | down |
| 6555121 | 7182713 | 1332539 | --- | --- | --- | 1,12 | up   |
| 6555159 | 7050557 | 1010795 | --- | --- | --- | 2,01 | down |
| 6555247 | 7240224 | 1474389 | --- | --- | --- | 1,23 | up   |
| 6555337 | 7176409 | 1315668 | --- | --- | --- | 1,19 | down |
| 6555398 | 7367990 | 1789226 | --- | --- | --- | 1,16 | up   |
| 6555580 | 7277719 | 1567086 | --- | --- | --- | 1,50 | down |
| 6555691 | 7384365 | 1830286 | --- | --- | --- | 1,23 | down |
| 6555826 | 7264797 | 1534436 | --- | --- | --- | 1,04 | up   |
| 6555857 | 7181086 | 1327927 | --- | --- | --- | 1,08 | down |
| 6555946 | 7031774 | 964766  | --- | --- | --- | 1,12 | down |
| 6555963 | 7049399 | 1008424 | --- | --- | --- | 1,18 | down |
| 6555967 | 7233970 | 1458269 | --- | --- | --- | 1,10 | down |
| 6555976 | 7065655 | 1045269 | --- | --- | --- | 1,07 | up   |
| 6555999 | 7095956 | 1117046 | --- | --- | --- | 2,37 | up   |
| 6556149 | 7270397 | 1548131 | --- | --- | --- | 1,29 | down |
| 6556165 | 7104977 | 1140169 | --- | --- | --- | 1,48 | down |
| 6556387 | 7245921 | 1487689 | --- | --- | --- | 1,31 | down |
| 6556398 | 7078666 | 1076520 | --- | --- | --- | 1,31 | down |
| 6556438 | 7303616 | 1631381 | --- | --- | --- | 1,23 | down |
| 6556470 | 7240665 | 1475835 | --- | --- | --- | 1,05 | up   |
| 6556593 | 7358859 | 1766985 | --- | --- | --- | 1,34 | up   |
| 6556646 | 7325416 | 1684598 | --- | --- | --- | 2,15 | down |
| 6556704 | 7263248 | 1530602 | --- | --- | --- | 1,05 | down |
| 6556777 | 7243603 | 1482275 | --- | --- | --- | 1,83 | up   |
| 6556802 | 7050930 | 1011623 | --- | --- | --- | 1,19 | up   |
| 6556985 | 7337845 | 1714347 | --- | --- | --- | 2,36 | down |
| 6557007 | 7225553 | 1435985 | --- | --- | --- | 1,03 | down |
| 6557013 | 7108345 | 1148071 | --- | --- | --- | 1,23 | down |
| 6557087 | 7301890 | 1626690 | --- | --- | --- | 1,07 | up   |
| 6557157 | 7384073 | 1829475 | --- | --- | --- | 1,12 | down |
| 6557195 | 7312566 | 1653328 | --- | --- | --- | 1,20 | down |
| 6557215 | 7076236 | 1071177 | --- | --- | --- | 1,90 | up   |
| 6557328 | 7364346 | 1779984 | --- | --- | --- | 1,48 | down |
| 6557371 | 7368006 | 1789355 | --- | --- | --- | 1,09 | down |
| 6557376 | 7034532 | 972652  | --- | --- | --- | 1,06 | up   |
| 6557511 | 7093936 | 1112477 | --- | --- | --- | 1,24 | up   |
| 6557523 | 7249503 | 1496181 | --- | --- | --- | 1,17 | down |
| 6557616 | 7243647 | 1482444 | --- | --- | --- | 1,09 | up   |
| 6557621 | 7203872 | 1384748 | --- | --- | --- | 1,36 | down |
| 6557629 | 7136062 | 1216294 | --- | --- | --- | 1,22 | down |
| 6557895 | 7039223 | 983564  | --- | --- | --- | 1,07 | up   |
| 6557939 | 7240569 | 1475328 | --- | --- | --- | 1,06 | down |
| 6557973 | 7214363 | 1408971 | --- | --- | --- | 1,01 | up   |
| 6557977 | 7143455 | 1234737 | --- | --- | --- | 2,53 | down |
| 6558069 | 7228656 | 1444240 | --- | --- | --- | 1,16 | up   |
| 6558097 | 7145669 | 1240003 | --- | --- | --- | 1,59 | up   |
| 6558109 | 7243130 | 1480935 | --- | --- | --- | 1,13 | down |
| 6558120 | 7287337 | 1589970 | --- | --- | --- | 2,01 | down |
| 6558197 | 7247229 | 1490553 | --- | --- | --- | 1,14 | up   |
| 6558339 | 7360325 | 1770532 | --- | --- | --- | 1,06 | up   |
| 6558385 | 7120039 | 1177523 | --- | --- | --- | 1,09 | up   |
| 6558387 | 7145669 | 1240005 | --- | --- | --- | 1,16 | down |
| 6558412 | 7272110 | 1553031 | --- | --- | --- | 2,11 | down |
| 6558429 | 7303722 | 1631718 | --- | --- | --- | 1,31 | up   |

|         |         |         |     |     |     |      |      |
|---------|---------|---------|-----|-----|-----|------|------|
| 6558673 | 7226241 | 1437813 | --- | --- | --- | 1,07 | down |
| 6558692 | 7155624 | 1264727 | --- | --- | --- | 4,01 | down |
| 6558787 | 7065265 | 1044574 | --- | --- | --- | 1,22 | down |
| 6558899 | 7247228 | 1490526 | --- | --- | --- | 1,29 | up   |
| 6558957 | 7367946 | 1788965 | --- | --- | --- | 1,16 | up   |
| 6558962 | 7133181 | 1209153 | --- | --- | --- | 1,22 | down |
| 6559211 | 7127691 | 1195630 | --- | --- | --- | 1,63 | down |
| 6559294 | 7236492 | 1464541 | --- | --- | --- | 1,26 | down |
| 6559349 | 7217650 | 1417205 | --- | --- | --- | 1,20 | up   |
| 6559370 | 7146245 | 1241377 | --- | --- | --- | 1,29 | down |
| 6559505 | 7376820 | 1813421 | --- | --- | --- | 1,10 | up   |
| 6559691 | 7129841 | 1200834 | --- | --- | --- | 1,02 | up   |
| 6559898 | 7322020 | 1676634 | --- | --- | --- | 1,37 | down |
| 6559919 | 7156052 | 1265757 | --- | --- | --- | 1,27 | down |
| 6560056 | 7344406 | 1731203 | --- | --- | --- | 1,59 | up   |
| 6560060 | 7108551 | 1148698 | --- | --- | --- | 1,04 | up   |
| 6560076 | 7297589 | 1615656 | --- | --- | --- | 1,16 | down |
| 6560215 | 7323522 | 1679867 | --- | --- | --- | 1,02 | down |
| 6560315 | 7363674 | 1778424 | --- | --- | --- | 1,43 | up   |
| 6560351 | 7120827 | 1179351 | --- | --- | --- | 2,35 | down |
| 6560398 | 7184850 | 1337597 | --- | --- | --- | 1,08 | up   |
| 6560409 | 7137646 | 1220437 | --- | --- | --- | 1,12 | down |
| 6560415 | 7034756 | 973225  | --- | --- | --- | 1,11 | down |
| 6560450 | 7385253 | 1832224 | --- | --- | --- | 1,08 | down |
| 6560463 | 7125348 | 1190100 | --- | --- | --- | 1,07 | up   |
| 6560521 | 7069239 | 1054091 | --- | --- | --- | 2,43 | down |
| 6560590 | 7036412 | 976858  | --- | --- | --- | 1,00 | up   |
| 6560612 | 7341253 | 1723301 | --- | --- | --- | 1,00 | up   |
| 6560627 | 7193056 | 1358270 | --- | --- | --- | 1,08 | down |
| 6560647 | 7069464 | 1054662 | --- | --- | --- | 1,09 | up   |
| 6560663 | 7251608 | 1501464 | --- | --- | --- | 1,02 | down |
| 6560748 | 7127540 | 1195278 | --- | --- | --- | 1,38 | up   |
| 6560766 | 7217650 | 1417190 | --- | --- | --- | 1,03 | down |
| 6560806 | 7072765 | 1062737 | --- | --- | --- | 1,06 | up   |
| 6560872 | 7344530 | 1731577 | --- | --- | --- | 1,15 | up   |
| 6560909 | 7146982 | 1243284 | --- | --- | --- | 1,84 | up   |
| 6561000 | 7033672 | 970337  | --- | --- | --- | 1,13 | down |
| 6561124 | 7065115 | 1044177 | --- | --- | --- | 1,97 | down |
| 6561153 | 7236395 | 1464330 | --- | --- | --- | 1,66 | down |
| 6561271 | 7264274 | 1533174 | --- | --- | --- | 2,68 | down |
| 6561294 | 7030454 | 961554  | --- | --- | --- | 1,08 | down |
| 6561382 | 7058713 | 1028667 | --- | --- | --- | 1,25 | up   |
| 6561401 | 7315571 | 1661011 | --- | --- | --- | 1,15 | down |
| 6561539 | 7069464 | 1054672 | --- | --- | --- | 1,22 | up   |
| 6561575 | 7068073 | 1051176 | --- | --- | --- | 1,28 | down |
| 6561576 | 7245066 | 1485578 | --- | --- | --- | 1,84 | up   |
| 6561617 | 7244602 | 1484780 | --- | --- | --- | 1,10 | down |
| 6561624 | 7356027 | 1759985 | --- | --- | --- | 1,32 | down |
| 6561628 | 7081657 | 1083070 | --- | --- | --- | 1,55 | down |
| 6561821 | 7217321 | 1416032 | --- | --- | --- | 2,69 | down |
| 6561996 | 7313411 | 1655439 | --- | --- | --- | 1,05 | up   |
| 6562023 | 7112225 | 1157536 | --- | --- | --- | 1,34 | up   |
| 6562215 | 7253272 | 1505578 | --- | --- | --- | 1,10 | down |
| 6562245 | 7086966 | 1095241 | --- | --- | --- | 1,24 | up   |
| 6562283 | 7329846 | 1694994 | --- | --- | --- | 1,02 | up   |
| 6562304 | 7211389 | 1402112 | --- | --- | --- | 2,06 | up   |

|         |         |         |     |     |     |      |      |
|---------|---------|---------|-----|-----|-----|------|------|
| 6562388 | 7327169 | 1688457 | --- | --- | --- | 1,26 | down |
| 6562398 | 7131360 | 1204990 | --- | --- | --- | 1,06 | up   |
| 6562402 | 7319937 | 1672261 | --- | --- | --- | 1,03 | down |
| 6562558 | 7247228 | 1490519 | --- | --- | --- | 2,06 | up   |
| 6562576 | 7088164 | 1098469 | --- | --- | --- | 2,59 | up   |
| 6562617 | 7329846 | 1694989 | --- | --- | --- | 1,20 | up   |
| 6562679 | 7132024 | 1206337 | --- | --- | --- | 1,15 | down |
| 6562737 | 7382452 | 1826171 | --- | --- | --- | 1,12 | up   |
| 6562761 | 7042382 | 991295  | --- | --- | --- | 1,21 | down |
| 6562850 | 7316644 | 1664026 | --- | --- | --- | 1,22 | up   |
| 6562881 | 7183182 | 1333557 | --- | --- | --- | 1,26 | up   |
| 6562959 | 7131550 | 1205554 | --- | --- | --- | 1,66 | down |
| 6563009 | 7303616 | 1631352 | --- | --- | --- | 1,03 | down |
| 6563011 | 7236395 | 1464331 | --- | --- | --- | 1,32 | up   |
| 6563047 | 7335091 | 1707319 | --- | --- | --- | 1,04 | down |
| 6563085 | 7076160 | 1070872 | --- | --- | --- | 1,94 | up   |
| 6563141 | 7191983 | 1355173 | --- | --- | --- | 1,54 | down |
| 6563193 | 7225304 | 1435314 | --- | --- | --- | 1,03 | up   |
| 6563237 | 7380497 | 1821828 | --- | --- | --- | 1,02 | down |
| 6563349 | 7051029 | 1011854 | --- | --- | --- | 1,06 | down |
| 6563365 | 7228530 | 1443904 | --- | --- | --- | 1,11 | up   |
| 6563578 | 7349817 | 1744642 | --- | --- | --- | 1,09 | up   |
| 6563599 | 7122319 | 1183071 | --- | --- | --- | 1,18 | up   |
| 6563639 | 7267802 | 1541836 | --- | --- | --- | 1,03 | down |
| 6563695 | 7243653 | 1482554 | --- | --- | --- | 1,02 | down |
| 6563786 | 7037764 | 980081  | --- | --- | --- | 1,19 | down |
| 6563823 | 7374143 | 1807008 | --- | --- | --- | 1,19 | down |
| 6563946 | 7280743 | 1574520 | --- | --- | --- | 1,30 | up   |
| 6564002 | 7199476 | 1374570 | --- | --- | --- | 1,13 | up   |
| 6564030 | 7289382 | 1595211 | --- | --- | --- | 1,03 | down |
| 6564033 | 7339379 | 1718364 | --- | --- | --- | 1,21 | down |
| 6564165 | 7168858 | 1296846 | --- | --- | --- | 1,11 | down |
| 6564166 | 7287222 | 1589729 | --- | --- | --- | 1,13 | up   |
| 6564260 | 7087492 | 1096701 | --- | --- | --- | 1,12 | down |
| 6564471 | 7115880 | 1166818 | --- | --- | --- | 1,07 | up   |
| 6564478 | 7312338 | 1652775 | --- | --- | --- | 4,44 | down |
| 6564495 | 7222221 | 1428056 | --- | --- | --- | 1,24 | down |
| 6564522 | 7240569 | 1475321 | --- | --- | --- | 1,35 | down |
| 6564582 | 7096924 | 1119618 | --- | --- | --- | 1,79 | up   |
| 6564600 | 7374740 | 1808626 | --- | --- | --- | 1,01 | up   |
| 6564619 | 7127540 | 1195280 | --- | --- | --- | 1,80 | down |
| 6564689 | 7112562 | 1158604 | --- | --- | --- | 1,01 | down |
| 6564767 | 7276650 | 1564133 | --- | --- | --- | 1,06 | up   |
| 6564817 | 7231203 | 1450431 | --- | --- | --- | 1,23 | down |
| 6564821 | 7034293 | 971849  | --- | --- | --- | 1,68 | down |
| 6564918 | 7101258 | 1130564 | --- | --- | --- | 1,27 | down |
| 6564933 | 7150348 | 1251381 | --- | --- | --- | 1,00 | up   |
| 6565001 | 7374143 | 1807009 | --- | --- | --- | 1,42 | down |
| 6565070 | 7377583 | 1815459 | --- | --- | --- | 1,48 | up   |
| 6565074 | 7234040 | 1458493 | --- | --- | --- | 1,43 | up   |
| 6565105 | 7049916 | 1009199 | --- | --- | --- | 2,51 | up   |
| 6565232 | 7156052 | 1265772 | --- | --- | --- | 1,17 | up   |
| 6565295 | 7383501 | 1828201 | --- | --- | --- | 1,62 | up   |
| 6565374 | 7297523 | 1615452 | --- | --- | --- | 1,44 | up   |
| 6565494 | 7180243 | 1325507 | --- | --- | --- | 2,41 | down |
| 6565550 | 7360486 | 1770948 | --- | --- | --- | 1,02 | up   |

|         |         |         |     |     |     |      |      |
|---------|---------|---------|-----|-----|-----|------|------|
| 6565617 | 7368004 | 1789329 | --- | --- | --- | 1,20 | up   |
| 6565674 | 7297589 | 1615665 | --- | --- | --- | 1,31 | down |
| 6565692 | 7235069 | 1460983 | --- | --- | --- | 1,05 | up   |
| 6565777 | 7028624 | 958000  | --- | --- | --- | 1,02 | up   |
| 6565780 | 7167507 | 1293120 | --- | --- | --- | 1,32 | up   |
| 6565804 | 7232029 | 1452789 | --- | --- | --- | 1,65 | up   |
| 6565835 | 7163892 | 1284214 | --- | --- | --- | 1,16 | down |
| 6565841 | 7265259 | 1535437 | --- | --- | --- | 1,42 | up   |
| 6565857 | 7374143 | 1807014 | --- | --- | --- | 1,22 | down |
| 6565869 | 7261592 | 1526846 | --- | --- | --- | 1,60 | down |
| 6565942 | 7096859 | 1119313 | --- | --- | --- | 1,26 | up   |
| 6565948 | 7199341 | 1374162 | --- | --- | --- | 1,18 | down |
| 6565951 | 7252383 | 1503516 | --- | --- | --- | 1,09 | down |
| 6565970 | 7080106 | 1079749 | --- | --- | --- | 1,08 | down |
| 6566050 | 7050930 | 1011615 | --- | --- | --- | 1,35 | up   |
| 6566060 | 7068259 | 1051644 | --- | --- | --- | 1,05 | down |
| 6566075 | 7371539 | 1800303 | --- | --- | --- | 1,09 | down |
| 6566187 | 7198210 | 1371006 | --- | --- | --- | 1,30 | up   |
| 6566206 | 7125160 | 1189600 | --- | --- | --- | 1,06 | up   |
| 6566277 | 7180861 | 1327224 | --- | --- | --- | 1,06 | down |
| 6566295 | 7320337 | 1673335 | --- | --- | --- | 1,01 | down |
| 6566306 | 7330396 | 1696337 | --- | --- | --- | 1,24 | down |
| 6566335 | 7280743 | 1574545 | --- | --- | --- | 1,11 | down |
| 6566457 | 7218728 | 1419926 | --- | --- | --- | 1,70 | up   |
| 6566503 | 7095021 | 1115131 | --- | --- | --- | 1,80 | down |
| 6566518 | 7374143 | 1807014 | --- | --- | --- | 1,31 | down |
| 6566570 | 7037764 | 980086  | --- | --- | --- | 1,06 | up   |
| 6566695 | 7025652 | 950342  | --- | --- | --- | 1,33 | up   |
| 6566702 | 7060851 | 1033432 | --- | --- | --- | 1,22 | up   |
| 6566747 | 7329846 | 1695001 | --- | --- | --- | 2,12 | down |
| 6566803 | 7378637 | 1817829 | --- | --- | --- | 1,52 | down |
| 6566962 | 7071969 | 1060899 | --- | --- | --- | 1,42 | up   |
| 6567003 | 7253408 | 1505950 | --- | --- | --- | 1,30 | down |
| 6567092 | 7363674 | 1778410 | --- | --- | --- | 1,14 | down |
| 6567130 | 7367971 | 1789134 | --- | --- | --- | 1,20 | up   |
| 6567213 | 7098126 | 1122980 | --- | --- | --- | 1,08 | up   |
| 6567237 | 7088723 | 1100102 | --- | --- | --- | 1,32 | down |
| 6567561 | 7156044 | 1265709 | --- | --- | --- | 1,12 | down |
| 6567582 | 7075424 | 1069284 | --- | --- | --- | 1,16 | up   |
| 6567584 | 7132024 | 1206340 | --- | --- | --- | 1,16 | up   |
| 6567598 | 7378997 | 1818671 | --- | --- | --- | 1,33 | down |
| 6567627 | 7254040 | 1507597 | --- | --- | --- | 1,34 | down |
| 6567679 | 7228848 | 1444755 | --- | --- | --- | 1,69 | down |
| 6567722 | 7368954 | 1792774 | --- | --- | --- | 2,24 | down |
| 6568036 | 7337260 | 1712810 | --- | --- | --- | 1,47 | up   |
| 6568097 | 7070869 | 1058470 | --- | --- | --- | 1,72 | down |
| 6568242 | 7361223 | 1772615 | --- | --- | --- | 1,29 | down |
| 6568361 | 7357815 | 1764124 | --- | --- | --- | 1,06 | up   |
| 6568426 | 7254088 | 1507737 | --- | --- | --- | 1,03 | up   |
| 6568456 | 7240569 | 1475463 | --- | --- | --- | 1,09 | down |
| 6568462 | 7340990 | 1722514 | --- | --- | --- | 2,50 | down |
| 6568706 | 7043535 | 994110  | --- | --- | --- | 1,29 | up   |
| 6568810 | 7263401 | 1530978 | --- | --- | --- | 2,04 | up   |
| 6568875 | 7111573 | 1156028 | --- | --- | --- | 1,06 | up   |
| 6568923 | 7256191 | 1512867 | --- | --- | --- | 1,18 | up   |
| 6569031 | 7058813 | 1028917 | --- | --- | --- | 1,36 | up   |



|         |         |         |     |     |     |      |      |
|---------|---------|---------|-----|-----|-----|------|------|
| 6569040 | 7217650 | 1417199 | --- | --- | --- | 2,45 | down |
| 6569151 | 7188685 | 1346321 | --- | --- | --- | 1,21 | down |
| 6569158 | 7373633 | 1805713 | --- | --- | --- | 1,24 | up   |
| 6569160 | 7319259 | 1670398 | --- | --- | --- | 1,20 | up   |
| 6569257 | 7189689 | 1349052 | --- | --- | --- | 1,65 | down |
| 6569315 | 7060851 | 1033444 | --- | --- | --- | 1,03 | up   |
| 6569372 | 7038530 | 981863  | --- | --- | --- | 1,32 | up   |
| 6569379 | 7342356 | 1725873 | --- | --- | --- | 1,31 | down |
| 6569508 | 7087965 | 1098031 | --- | --- | --- | 1,13 | up   |
| 6569510 | 7236492 | 1464545 | --- | --- | --- | 1,02 | down |
| 6569525 | 7294264 | 1606845 | --- | --- | --- | 1,02 | up   |
| 6569575 | 7192186 | 1355617 | --- | --- | --- | 1,03 | up   |
| 6569616 | 7358859 | 1767008 | --- | --- | --- | 1,03 | down |
| 6569693 | 7245921 | 1487690 | --- | --- | --- | 1,43 | down |
| 6569700 | 7213908 | 1407760 | --- | --- | --- | 1,05 | up   |
| 6569794 | 7076236 | 1071195 | --- | --- | --- | 1,05 | up   |
| 6569802 | 7256191 | 1512884 | --- | --- | --- | 1,01 | up   |
| 6569830 | 7058813 | 1028902 | --- | --- | --- | 1,80 | up   |
| 6569882 | 7268457 | 1543637 | --- | --- | --- | 1,00 | down |
| 6569939 | 7384073 | 1829466 | --- | --- | --- | 1,31 | up   |
| 6570015 | 7231203 | 1450474 | --- | --- | --- | 1,31 | up   |
| 6570022 | 7364346 | 1779993 | --- | --- | --- | 1,05 | up   |
| 6570081 | 7209927 | 1398924 | --- | --- | --- | 1,22 | up   |
| 6570111 | 7267802 | 1541743 | --- | --- | --- | 1,07 | up   |
| 6570207 | 7199476 | 1374536 | --- | --- | --- | 1,07 | up   |
| 6570254 | 7276231 | 1563117 | --- | --- | --- | 1,07 | up   |
| 6570256 | 7137751 | 1220585 | --- | --- | --- | 2,24 | up   |
| 6570288 | 7339110 | 1717606 | --- | --- | --- | 1,13 | down |
| 6570412 | 7240569 | 1475481 | --- | --- | --- | 1,01 | up   |
| 6570487 | 7075424 | 1069278 | --- | --- | --- | 1,31 | down |
| 6570591 | 7378878 | 1818318 | --- | --- | --- | 1,53 | down |
| 6570625 | 7193056 | 1358284 | --- | --- | --- | 1,14 | up   |
| 6570647 | 7236395 | 1464330 | --- | --- | --- | 1,17 | down |
| 6570650 | 7108551 | 1148708 | --- | --- | --- | 1,01 | up   |
| 6570653 | 7257361 | 1516099 | --- | --- | --- | 1,17 | down |
| 6570669 | 7058813 | 1028903 | --- | --- | --- | 1,19 | up   |
| 6570674 | 7301616 | 1625902 | --- | --- | --- | 1,13 | down |
| 6570874 | 7360486 | 1770942 | --- | --- | --- | 1,21 | down |
| 6570880 | 7243647 | 1482450 | --- | --- | --- | 1,02 | up   |
| 6571069 | 7368729 | 1792049 | --- | --- | --- | 1,01 | down |
| 6571118 | 7068942 | 1053366 | --- | --- | --- | 1,01 | up   |
| 6571146 | 7341253 | 1723288 | --- | --- | --- | 2,44 | down |
| 6571151 | 7222221 | 1428058 | --- | --- | --- | 1,01 | down |
| 6571197 | 7092406 | 1108786 | --- | --- | --- | 1,06 | up   |
| 6571209 | 7181105 | 1327948 | --- | --- | --- | 1,15 | down |
| 6571277 | 7092549 | 1109189 | --- | --- | --- | 1,28 | up   |
| 6571296 | 7277719 | 1567080 | --- | --- | --- | 1,03 | down |
| 6571446 | 7058713 | 1028660 | --- | --- | --- | 1,04 | up   |
| 6571666 | 7162177 | 1280579 | --- | --- | --- | 1,12 | up   |
| 6571690 | 7345465 | 1733837 | --- | --- | --- | 1,18 | up   |
| 6571746 | 7209927 | 1398932 | --- | --- | --- | 1,03 | down |
| 6571749 | 7130889 | 1203882 | --- | --- | --- | 1,04 | down |
| 6571775 | 7193644 | 1359716 | --- | --- | --- | 1,23 | down |
| 6571826 | 7038669 | 982189  | --- | --- | --- | 1,07 | up   |
| 6571869 | 7331434 | 1699218 | --- | --- | --- | 1,01 | down |
| 6571944 | 7197056 | 1367837 | --- | --- | --- | 1,01 | up   |

|         |         |         |     |     |     |      |      |
|---------|---------|---------|-----|-----|-----|------|------|
| 6571961 | 7267802 | 1541799 | --- | --- | --- | 1,24 | down |
| 6572034 | 7189689 | 1349041 | --- | --- | --- | 1,04 | down |
| 6572099 | 7181105 | 1327948 | --- | --- | --- | 1,45 | up   |
| 6572194 | 7145669 | 1239990 | --- | --- | --- | 1,02 | up   |
| 6572405 | 7099156 | 1125637 | --- | --- | --- | 1,01 | down |
| 6572459 | 7097454 | 1120884 | --- | --- | --- | 1,26 | down |
| 6572516 | 7364346 | 1779966 | --- | --- | --- | 1,64 | down |
| 6572616 | 7248790 | 1494548 | --- | --- | --- | 1,14 | down |
| 6572642 | 7030863 | 962596  | --- | --- | --- | 2,21 | up   |
| 6572856 | 7199476 | 1374523 | --- | --- | --- | 1,01 | up   |
| 6572863 | 7210387 | 1400036 | --- | --- | --- | 1,17 | down |
| 6572888 | 7297589 | 1615647 | --- | --- | --- | 1,06 | down |
| 6572996 | 7167883 | 1294108 | --- | --- | --- | 1,74 | down |
| 6573053 | 7170845 | 1301899 | --- | --- | --- | 1,69 | up   |
| 6573135 | 7371643 | 1800656 | --- | --- | --- | 1,05 | down |
| 6573187 | 7133612 | 1210252 | --- | --- | --- | 1,21 | down |
| 6573363 | 7068942 | 1053385 | --- | --- | --- | 1,11 | up   |
| 6573374 | 7323545 | 1679934 | --- | --- | --- | 1,40 | down |
| 6573402 | 7327169 | 1688466 | --- | --- | --- | 1,19 | down |
| 6573405 | 7211389 | 1402114 | --- | --- | --- | 1,08 | down |
| 6573408 | 7138047 | 1221232 | --- | --- | --- | 1,38 | down |
| 6573433 | 7189574 | 1348711 | --- | --- | --- | 1,06 | up   |
| 6573459 | 7247954 | 1492358 | --- | --- | --- | 1,10 | down |
| 6573576 | 7237438 | 1466784 | --- | --- | --- | 1,21 | up   |
| 6573898 | 7226241 | 1437778 | --- | --- | --- | 1,27 | down |
| 6573950 | 7146093 | 1240980 | --- | --- | --- | 1,31 | up   |
| 6573966 | 7052385 | 1014799 | --- | --- | --- | 1,05 | up   |
| 6574074 | 7115362 | 1165599 | --- | --- | --- | 1,20 | down |
| 6574125 | 7277783 | 1567447 | --- | --- | --- | 2,11 | up   |
| 6574346 | 7176456 | 1315832 | --- | --- | --- | 1,04 | up   |
| 6574435 | 7226241 | 1437803 | --- | --- | --- | 1,27 | up   |
| 6574496 | 7193644 | 1359712 | --- | --- | --- | 1,19 | down |
| 6574512 | 7359659 | 1768841 | --- | --- | --- | 1,31 | down |
| 6574600 | 7360486 | 1770964 | --- | --- | --- | 3,91 | down |
| 6574610 | 7315206 | 1660027 | --- | --- | --- | 1,27 | up   |
| 6574624 | 7255663 | 1511711 | --- | --- | --- | 1,60 | up   |
| 6574874 | 7039223 | 983575  | --- | --- | --- | 1,18 | down |
| 6575037 | 7240569 | 1475510 | --- | --- | --- | 1,00 | up   |
| 6575131 | 7112225 | 1157576 | --- | --- | --- | 1,90 | down |
| 6575145 | 7236254 | 1464071 | --- | --- | --- | 1,12 | up   |
| 6575311 | 7186106 | 1340487 | --- | --- | --- | 1,33 | up   |
| 6575386 | 7266532 | 1538305 | --- | --- | --- | 1,26 | down |
| 6575455 | 7320337 | 1673314 | --- | --- | --- | 1,27 | up   |
| 6575541 | 7037764 | 980000  | --- | --- | --- | 1,10 | down |
| 6575673 | 7041609 | 989568  | --- | --- | --- | 1,18 | up   |
| 6575681 | 7323545 | 1679972 | --- | --- | --- | 1,16 | up   |
| 6575765 | 7344530 | 1731565 | --- | --- | --- | 1,03 | up   |
| 6575769 | 7263152 | 1530384 | --- | --- | --- | 1,16 | down |
| 6575825 | 7080106 | 1079737 | --- | --- | --- | 1,01 | up   |
| 6575886 | 7202550 | 1381605 | --- | --- | --- | 1,15 | up   |
| 6576093 | 7068259 | 1051636 | --- | --- | --- | 1,05 | up   |
| 6576414 | 7249503 | 1496234 | --- | --- | --- | 1,17 | up   |
| 6576489 | 7072332 | 1061647 | --- | --- | --- | 1,01 | up   |
| 6576512 | 7111837 | 1156821 | --- | --- | --- | 1,08 | down |
| 6576565 | 7188138 | 1345017 | --- | --- | --- | 1,43 | up   |
| 6576606 | 7025652 | 950277  | --- | --- | --- | 1,03 | down |

|         |         |         |     |     |     |      |      |
|---------|---------|---------|-----|-----|-----|------|------|
| 6576700 | 7331297 | 1698808 | --- | --- | --- | 1,38 | down |
| 6576729 | 7139708 | 1225052 | --- | --- | --- | 1,10 | up   |
| 6576771 | 7218259 | 1418806 | --- | --- | --- | 1,26 | down |
| 6576906 | 7226241 | 1437785 | --- | --- | --- | 1,17 | up   |
| 6576914 | 7349643 | 1744174 | --- | --- | --- | 1,11 | up   |
| 6576979 | 7199341 | 1374140 | --- | --- | --- | 1,23 | up   |
| 6576980 | 7342959 | 1727336 | --- | --- | --- | 1,05 | up   |
| 6577126 | 7307485 | 1641330 | --- | --- | --- | 1,13 | down |
| 6577154 | 7098126 | 1122981 | --- | --- | --- | 1,27 | down |
| 6577240 | 7040260 | 986040  | --- | --- | --- | 1,14 | up   |
| 6577313 | 7297589 | 1615687 | --- | --- | --- | 1,79 | up   |
| 6577455 | 7148978 | 1248548 | --- | --- | --- | 1,05 | down |
| 6577565 | 7097525 | 1121059 | --- | --- | --- | 1,39 | up   |
| 6577634 | 7240569 | 1475360 | --- | --- | --- | 1,00 | down |
| 6577650 | 7031618 | 964202  | --- | --- | --- | 1,16 | down |
| 6577673 | 7374790 | 1808784 | --- | --- | --- | 1,02 | up   |
| 6577690 | 7331602 | 1699641 | --- | --- | --- | 2,01 | down |
| 6577707 | 7198210 | 1370981 | --- | --- | --- | 1,53 | up   |
| 6577811 | 7261766 | 1527159 | --- | --- | --- | 1,23 | up   |
| 6578032 | 7330727 | 1697141 | --- | --- | --- | 1,23 | up   |
| 6578077 | 7033337 | 969490  | --- | --- | --- | 1,44 | down |
| 6578184 | 7194202 | 1361297 | --- | --- | --- | 2,89 | up   |
| 6578246 | 7111573 | 1156015 | --- | --- | --- | 1,01 | up   |
| 6578330 | 7255755 | 1511912 | --- | --- | --- | 2,14 | up   |
| 6578339 | 7301616 | 1625898 | --- | --- | --- | 1,33 | up   |
| 6578401 | 7360486 | 1770963 | --- | --- | --- | 1,49 | down |
| 6578423 | 7373678 | 1805860 | --- | --- | --- | 1,23 | down |
| 6578426 | 7092549 | 1109198 | --- | --- | --- | 1,28 | down |
| 6578574 | 7231203 | 1450391 | --- | --- | --- | 1,05 | down |
| 6578604 | 7384073 | 1829471 | --- | --- | --- | 1,00 | down |
| 6578648 | 7294151 | 1606620 | --- | --- | --- | 1,26 | down |
| 6578758 | 7236395 | 1464335 | --- | --- | --- | 1,17 | down |
| 6578808 | 7189689 | 1349031 | --- | --- | --- | 1,33 | up   |
| 6578887 | 7101643 | 1131595 | --- | --- | --- | 1,05 | up   |
| 6578913 | 7367305 | 1786999 | --- | --- | --- | 2,12 | down |
| 6579060 | 7064220 | 1041766 | --- | --- | --- | 1,01 | down |
| 6579114 | 7142081 | 1230976 | --- | --- | --- | 1,15 | down |
| 6579191 | 7326612 | 1687203 | --- | --- | --- | 1,17 | up   |
| 6579225 | 7339379 | 1718358 | --- | --- | --- | 1,95 | down |
| 6579339 | 7329846 | 1694997 | --- | --- | --- | 1,50 | down |
| 6579429 | 7056333 | 1023672 | --- | --- | --- | 1,04 | up   |
| 6579490 | 7315571 | 1661004 | --- | --- | --- | 1,09 | down |
| 6579549 | 7248790 | 1494496 | --- | --- | --- | 1,35 | up   |
| 6579599 | 7038316 | 981460  | --- | --- | --- | 1,02 | down |
| 6579905 | 7059449 | 1030304 | --- | --- | --- | 1,31 | up   |
| 6579908 | 7267380 | 1540397 | --- | --- | --- | 1,62 | down |
| 6579919 | 7289909 | 1596509 | --- | --- | --- | 1,29 | up   |
| 6579923 | 7240569 | 1475366 | --- | --- | --- | 1,10 | up   |
| 6579999 | 7355421 | 1758508 | --- | --- | --- | 2,22 | up   |
| 6580134 | 7355804 | 1759433 | --- | --- | --- | 1,94 | down |
| 6580200 | 7356001 | 1759921 | --- | --- | --- | 2,01 | down |
| 6580241 | 7025652 | 950291  | --- | --- | --- | 1,25 | down |
| 6580260 | 7075445 | 1069351 | --- | --- | --- | 1,05 | down |
| 6580292 | 7253408 | 1505950 | --- | --- | --- | 1,07 | up   |
| 6580511 | 7380497 | 1821825 | --- | --- | --- | 1,00 | down |
| 6580589 | 7356115 | 1760113 | --- | --- | --- | 1,12 | up   |

|         |         |         |     |     |     |      |      |
|---------|---------|---------|-----|-----|-----|------|------|
| 6580743 | 7098126 | 1122985 | --- | --- | --- | 1,05 | down |
| 6580895 | 7334331 | 1705690 | --- | --- | --- | 1,48 | down |
| 6580958 | 7037235 | 978585  | --- | --- | --- | 1,23 | up   |
| 6580961 | 7086966 | 1095268 | --- | --- | --- | 1,04 | up   |
| 6581026 | 7345882 | 1734812 | --- | --- | --- | 1,04 | up   |
| 6581116 | 7084993 | 1090674 | --- | --- | --- | 1,07 | down |
| 6581157 | 7047865 | 1005353 | --- | --- | --- | 1,12 | up   |
| 6581223 | 7043535 | 994120  | --- | --- | --- | 1,55 | down |
| 6581254 | 7217747 | 1417509 | --- | --- | --- | 2,58 | up   |
| 6581346 | 7082098 | 1084110 | --- | --- | --- | 1,10 | up   |
| 6581389 | 7127257 | 1194805 | --- | --- | --- | 1,69 | up   |
| 6581398 | 7217747 | 1417485 | --- | --- | --- | 1,03 | down |
| 6581403 | 7267802 | 1541872 | --- | --- | --- | 1,34 | up   |
| 6581549 | 7214363 | 1408968 | --- | --- | --- | 1,39 | up   |
| 6581608 | 7221552 | 1426615 | --- | --- | --- | 1,25 | up   |
| 6581685 | 7167507 | 1293125 | --- | --- | --- | 1,10 | down |
| 6581701 | 7069830 | 1055645 | --- | --- | --- | 1,56 | up   |
| 6581712 | 7049118 | 1007792 | --- | --- | --- | 1,04 | down |
| 6581729 | 7209927 | 1398930 | --- | --- | --- | 1,44 | down |
| 6581838 | 7307424 | 1641140 | --- | --- | --- | 1,69 | down |
| 6581873 | 7247334 | 1490820 | --- | --- | --- | 1,49 | up   |
| 6581936 | 7145669 | 1240008 | --- | --- | --- | 1,11 | up   |
| 6581949 | 7049399 | 1008403 | --- | --- | --- | 1,09 | up   |
| 6581960 | 7373634 | 1805725 | --- | --- | --- | 1,30 | up   |
| 6581976 | 7061703 | 1035735 | --- | --- | --- | 1,08 | down |
| 6582046 | 7143240 | 1234156 | --- | --- | --- | 1,13 | up   |
| 6582088 | 7174149 | 1310521 | --- | --- | --- | 1,03 | down |
| 6582147 | 7319937 | 1672261 | --- | --- | --- | 1,18 | up   |
| 6582155 | 7029770 | 960158  | --- | --- | --- | 1,19 | down |
| 6582201 | 7281077 | 1575563 | --- | --- | --- | 1,56 | up   |
| 6582213 | 7229886 | 1447172 | --- | --- | --- | 1,21 | up   |
| 6582247 | 7226241 | 1437791 | --- | --- | --- | 1,17 | down |
| 6582340 | 7131360 | 1204980 | --- | --- | --- | 1,25 | up   |
| 6582382 | 7062436 | 1037682 | --- | --- | --- | 1,16 | up   |
| 6582395 | 7115146 | 1164937 | --- | --- | --- | 1,24 | up   |
| 6582506 | 7369939 | 1795606 | --- | --- | --- | 2,17 | up   |
| 6582610 | 7243647 | 1482477 | --- | --- | --- | 1,01 | down |
| 6582659 | 7068942 | 1053391 | --- | --- | --- | 1,24 | down |
| 6582664 | 7052813 | 1015941 | --- | --- | --- | 1,34 | down |
| 6582951 | 7098867 | 1124958 | --- | --- | --- | 1,30 | down |
| 6583033 | 7256238 | 1513032 | --- | --- | --- | 1,14 | up   |
| 6583036 | 7248790 | 1494567 | --- | --- | --- | 1,07 | up   |
| 6583058 | 7195903 | 1365327 | --- | --- | --- | 1,30 | up   |
| 6583126 | 7141061 | 1228643 | --- | --- | --- | 1,10 | up   |
| 6583225 | 7129841 | 1200835 | --- | --- | --- | 1,55 | down |
| 6583323 | 7281494 | 1576589 | --- | --- | --- | 1,20 | down |
| 6583383 | 7130889 | 1203865 | --- | --- | --- | 1,03 | up   |
| 6583466 | 7238115 | 1468627 | --- | --- | --- | 1,10 | up   |
| 6583525 | 7087282 | 1096170 | --- | --- | --- | 1,36 | up   |
| 6583533 | 7280743 | 1574517 | --- | --- | --- | 1,37 | up   |
| 6583564 | 7263152 | 1530357 | --- | --- | --- | 1,54 | up   |
| 6583704 | 7280743 | 1574497 | --- | --- | --- | 1,14 | up   |
| 6583740 | 7147809 | 1245449 | --- | --- | --- | 1,31 | down |
| 6583812 | 7274892 | 1559581 | --- | --- | --- | 1,20 | down |
| 6583838 | 7376566 | 1812861 | --- | --- | --- | 1,26 | down |
| 6583851 | 7284359 | 1583434 | --- | --- | --- | 1,27 | up   |

|         |         |         |     |     |     |      |      |
|---------|---------|---------|-----|-----|-----|------|------|
| 6583939 | 7042382 | 991295  | --- | --- | --- | 1,89 | down |
| 6584060 | 7299785 | 1621353 | --- | --- | --- | 1,01 | up   |
| 6584307 | 7337522 | 1713595 | --- | --- | --- | 1,44 | down |
| 6584354 | 7084792 | 1090341 | --- | --- | --- | 1,46 | down |
| 6584392 | 7224166 | 1432687 | --- | --- | --- | 1,99 | down |
| 6584497 | 7034293 | 971929  | --- | --- | --- | 1,01 | down |
| 6584502 | 7181016 | 1327778 | --- | --- | --- | 1,10 | up   |
| 6584564 | 7353441 | 1753334 | --- | --- | --- | 1,40 | up   |
| 6584595 | 7068259 | 1051659 | --- | --- | --- | 1,14 | down |
| 6584669 | 7248790 | 1494533 | --- | --- | --- | 1,38 | down |
| 6584736 | 7287222 | 1589717 | --- | --- | --- | 1,05 | down |
| 6584809 | 7127691 | 1195630 | --- | --- | --- | 1,45 | down |
| 6584881 | 7224166 | 1432687 | --- | --- | --- | 1,11 | up   |
| 6584890 | 7311218 | 1650356 | --- | --- | --- | 1,32 | up   |
| 6584897 | 7167507 | 1293131 | --- | --- | --- | 1,09 | up   |
| 6584944 | 7042382 | 991292  | --- | --- | --- | 1,32 | up   |
| 6585004 | 7385253 | 1832225 | --- | --- | --- | 1,11 | down |
| 6585054 | 7217679 | 1417294 | --- | --- | --- | 1,75 | down |
| 6585059 | 7052933 | 1016219 | --- | --- | --- | 1,02 | up   |
| 6585073 | 7188829 | 1346669 | --- | --- | --- | 1,26 | down |
| 6585150 | 7231589 | 1451695 | --- | --- | --- | 1,62 | down |
| 6585288 | 7120195 | 1177874 | --- | --- | --- | 1,17 | up   |
| 6585321 | 7351953 | 1749881 | --- | --- | --- | 1,10 | up   |
| 6585360 | 7068259 | 1051635 | --- | --- | --- | 1,17 | up   |
| 6585389 | 7114108 | 1162444 | --- | --- | --- | 1,06 | up   |
| 6585401 | 7142081 | 1230973 | --- | --- | --- | 1,11 | up   |
| 6585451 | 7380497 | 1821869 | --- | --- | --- | 1,11 | up   |
| 6585652 | 7156044 | 1265714 | --- | --- | --- | 1,32 | down |
| 6585675 | 7378546 | 1817594 | --- | --- | --- | 1,29 | down |
| 6585683 | 7025652 | 950275  | --- | --- | --- | 1,18 | down |
| 6585765 | 7253408 | 1505953 | --- | --- | --- | 1,07 | down |
| 6585798 | 7337845 | 1714345 | --- | --- | --- | 1,26 | up   |
| 6585826 | 7196029 | 1365624 | --- | --- | --- | 1,05 | down |
| 6585903 | 7052813 | 1015887 | --- | --- | --- | 1,02 | down |
| 6586013 | 7268457 | 1543637 | --- | --- | --- | 1,16 | up   |
| 6586179 | 7168858 | 1296848 | --- | --- | --- | 1,10 | up   |
| 6586252 | 7043535 | 994103  | --- | --- | --- | 1,09 | up   |
| 6586263 | 7087965 | 1098018 | --- | --- | --- | 1,36 | down |
| 6586279 | 7087492 | 1096698 | --- | --- | --- | 1,01 | up   |
| 6586316 | 7299512 | 1620553 | --- | --- | --- | 2,49 | down |
| 6586472 | 7198210 | 1370990 | --- | --- | --- | 1,04 | up   |
| 6586520 | 7096859 | 1119303 | --- | --- | --- | 1,15 | up   |
| 6586542 | 7332970 | 1702533 | --- | --- | --- | 1,29 | up   |
| 6586550 | 7177180 | 1317778 | --- | --- | --- | 1,19 | up   |
| 6586634 | 7261592 | 1526843 | --- | --- | --- | 1,37 | down |
| 6586657 | 7069142 | 1053873 | --- | --- | --- | 1,21 | down |
| 6586663 | 7096859 | 1119316 | --- | --- | --- | 1,12 | up   |
| 6586995 | 7189574 | 1348689 | --- | --- | --- | 3,42 | down |
| 6587004 | 7087805 | 1097455 | --- | --- | --- | 1,44 | up   |
| 6587019 | 7168858 | 1296826 | --- | --- | --- | 1,04 | down |
| 6587032 | 7217679 | 1417296 | --- | --- | --- | 1,07 | up   |
| 6587231 | 7181193 | 1328289 | --- | --- | --- | 1,06 | down |
| 6587250 | 7289382 | 1595205 | --- | --- | --- | 1,42 | down |
| 6587259 | 7242490 | 1479444 | --- | --- | --- | 1,38 | up   |
| 6587294 | 7236395 | 1464340 | --- | --- | --- | 1,24 | down |
| 6587297 | 7373633 | 1805702 | --- | --- | --- | 1,32 | down |

|         |         |         |     |     |     |      |      |
|---------|---------|---------|-----|-----|-----|------|------|
| 6587388 | 7292517 | 1602556 | --- | --- | --- | 2,18 | down |
| 6587451 | 7276650 | 1564140 | --- | --- | --- | 1,03 | up   |
| 6587636 | 7049399 | 1008404 | --- | --- | --- | 1,13 | down |
| 6587678 | 7368684 | 1791854 | --- | --- | --- | 1,67 | up   |
| 6587696 | 7358859 | 1766980 | --- | --- | --- | 1,63 | up   |
| 6587717 | 7189669 | 1348977 | --- | --- | --- | 1,14 | up   |
| 6587919 | 7049399 | 1008381 | --- | --- | --- | 1,05 | down |
| 6587930 | 7213908 | 1407671 | --- | --- | --- | 1,09 | up   |
| 6587978 | 7039223 | 983567  | --- | --- | --- | 1,31 | up   |
| 6588060 | 7365183 | 1781905 | --- | --- | --- | 1,88 | up   |
| 6588062 | 7261019 | 1525281 | --- | --- | --- | 1,34 | up   |
| 6588134 | 7280743 | 1574481 | --- | --- | --- | 1,16 | down |
| 6588206 | 7341253 | 1723296 | --- | --- | --- | 1,02 | down |
| 6588312 | 7238115 | 1468641 | --- | --- | --- | 1,07 | down |
| 6588357 | 7056333 | 1023682 | --- | --- | --- | 1,25 | down |
| 6588359 | 7279303 | 1571203 | --- | --- | --- | 1,34 | down |
| 6588361 | 7070869 | 1058499 | --- | --- | --- | 1,16 | up   |
| 6588511 | 7059020 | 1029354 | --- | --- | --- | 1,54 | down |
| 6588517 | 7075096 | 1068575 | --- | --- | --- | 1,89 | up   |
| 6588548 | 7343122 | 1727746 | --- | --- | --- | 1,06 | down |
| 6588568 | 7287222 | 1589723 | --- | --- | --- | 1,19 | down |
| 6588627 | 7195903 | 1365336 | --- | --- | --- | 1,22 | up   |
| 6588668 | 7025652 | 950357  | --- | --- | --- | 1,57 | up   |
| 6588674 | 7341397 | 1723649 | --- | --- | --- | 1,03 | down |
| 6588687 | 7236254 | 1464078 | --- | --- | --- | 2,07 | down |
| 6588696 | 7282343 | 1578678 | --- | --- | --- | 1,03 | down |
| 6588742 | 7052933 | 1016211 | --- | --- | --- | 1,07 | up   |
| 6588859 | 7280743 | 1574475 | --- | --- | --- | 1,09 | down |
| 6589040 | 7041609 | 989557  | --- | --- | --- | 1,04 | down |
| 6589078 | 7272110 | 1553078 | --- | --- | --- | 1,16 | up   |
| 6589083 | 7036870 | 977869  | --- | --- | --- | 1,23 | up   |
| 6589280 | 7069253 | 1054157 | --- | --- | --- | 1,07 | up   |
| 6589318 | 7168858 | 1296828 | --- | --- | --- | 1,05 | down |
| 6589378 | 7257976 | 1517712 | --- | --- | --- | 1,19 | up   |
| 6589427 | 7384073 | 1829470 | --- | --- | --- | 1,26 | up   |
| 6589462 | 7295410 | 1609779 | --- | --- | --- | 1,25 | up   |
| 6589646 | 7243603 | 1482280 | --- | --- | --- | 1,00 | down |
| 6589715 | 7342959 | 1727355 | --- | --- | --- | 2,15 | down |
| 6589769 | 7167876 | 1294048 | --- | --- | --- | 1,35 | up   |
| 6589789 | 7189574 | 1348706 | --- | --- | --- | 1,20 | up   |
| 6589862 | 7280743 | 1574553 | --- | --- | --- | 1,32 | down |
| 6589875 | 7031325 | 963573  | --- | --- | --- | 1,03 | up   |
| 6590044 | 7145669 | 1239990 | --- | --- | --- | 1,81 | up   |
| 6590197 | 7129688 | 1200558 | --- | --- | --- | 1,17 | down |
| 6590318 | 7267380 | 1540404 | --- | --- | --- | 1,50 | up   |
| 6590482 | 7367969 | 1789105 | --- | --- | --- | 2,06 | down |
| 6590924 | 7337224 | 1712599 | --- | --- | --- | 1,11 | down |
| 6590937 | 7229886 | 1447149 | --- | --- | --- | 1,01 | down |
| 6590941 | 7101258 | 1130562 | --- | --- | --- | 1,04 | up   |
| 6590972 | 7334347 | 1705751 | --- | --- | --- | 1,19 | up   |
| 6591003 | 7358859 | 1766974 | --- | --- | --- | 1,11 | up   |
| 6591033 | 7097680 | 1121729 | --- | --- | --- | 1,06 | down |
| 6591076 | 7043379 | 993641  | --- | --- | --- | 1,63 | down |
| 6591109 | 7291054 | 1599395 | --- | --- | --- | 1,35 | up   |
| 6591156 | 7181193 | 1328288 | --- | --- | --- | 1,48 | up   |
| 6591158 | 7334347 | 1705777 | --- | --- | --- | 1,00 | down |

|         |         |         |     |     |     |      |      |
|---------|---------|---------|-----|-----|-----|------|------|
| 6591190 | 7084193 | 1089055 | --- | --- | --- | 1,68 | up   |
| 6591294 | 7365093 | 1781623 | --- | --- | --- | 1,06 | up   |
| 6591318 | 7320337 | 1673314 | --- | --- | --- | 1,00 | up   |
| 6591470 | 7320337 | 1673317 | --- | --- | --- | 1,23 | down |
| 6591568 | 7049399 | 1008407 | --- | --- | --- | 1,34 | up   |
| 6591684 | 7274780 | 1559244 | --- | --- | --- | 1,32 | down |
| 6591778 | 7351951 | 1749843 | --- | --- | --- | 1,04 | down |
| 6591823 | 7156978 | 1268178 | --- | --- | --- | 2,02 | down |
| 6591877 | 7086522 | 1093943 | --- | --- | --- | 1,20 | down |
| 6592026 | 7198325 | 1371352 | --- | --- | --- | 1,13 | down |
| 6592094 | 7342959 | 1727344 | --- | --- | --- | 1,25 | down |
| 6592151 | 7371677 | 1800755 | --- | --- | --- | 1,08 | down |
| 6592306 | 7295410 | 1609733 | --- | --- | --- | 1,01 | down |
| 6592372 | 7240665 | 1475832 | --- | --- | --- | 1,10 | down |
| 6592413 | 7293757 | 1605690 | --- | --- | --- | 1,00 | down |
| 6592452 | 7339286 | 1718104 | --- | --- | --- | 1,02 | down |
| 6592505 | 7113483 | 1160995 | --- | --- | --- | 1,37 | down |
| 6592514 | 7129841 | 1200832 | --- | --- | --- | 1,02 | down |
| 6592679 | 7068697 | 1052768 | --- | --- | --- | 1,24 | down |
| 6592685 | 7384073 | 1829471 | --- | --- | --- | 1,06 | up   |
| 6592855 | 7240569 | 1475458 | --- | --- | --- | 1,11 | down |
| 6593113 | 7335632 | 1708453 | --- | --- | --- | 1,32 | down |
| 6593219 | 7171047 | 1302370 | --- | --- | --- | 2,63 | up   |
| 6593310 | 7279586 | 1572073 | --- | --- | --- | 1,26 | up   |
| 6593343 | 7267953 | 1542235 | --- | --- | --- | 1,18 | down |
| 6593512 | 7168858 | 1296819 | --- | --- | --- | 1,40 | down |
| 6593514 | 7320337 | 1673310 | --- | --- | --- | 1,08 | down |
| 6593569 | 7225553 | 1435984 | --- | --- | --- | 1,74 | down |
| 6593782 | 7067828 | 1050798 | --- | --- | --- | 1,56 | down |
| 6593814 | 7075445 | 1069357 | --- | --- | --- | 1,31 | down |
| 6593828 | 7185622 | 1339217 | --- | --- | --- | 1,02 | up   |
| 6593858 | 7330238 | 1695948 | --- | --- | --- | 2,07 | down |
| 6593934 | 7319486 | 1670926 | --- | --- | --- | 2,43 | down |
| 6593935 | 7297274 | 1614657 | --- | --- | --- | 1,06 | up   |
| 6593952 | 7113483 | 1161023 | --- | --- | --- | 1,13 | up   |
| 6593995 | 7222221 | 1428060 | --- | --- | --- | 1,24 | up   |
| 6594003 | 7323545 | 1679941 | --- | --- | --- | 1,06 | down |
| 6594004 | 7050726 | 1011266 | --- | --- | --- | 1,01 | down |
| 6594008 | 7068143 | 1051296 | --- | --- | --- | 1,44 | down |
| 6594014 | 7378997 | 1818678 | --- | --- | --- | 1,07 | up   |
| 6594189 | 7059584 | 1030557 | --- | --- | --- | 1,51 | down |
| 6594239 | 7115880 | 1166826 | --- | --- | --- | 1,08 | down |
| 6594256 | 7326612 | 1687186 | --- | --- | --- | 1,10 | down |
| 6594384 | 7043379 | 993638  | --- | --- | --- | 1,12 | down |
| 6594408 | 7180861 | 1327222 | --- | --- | --- | 1,05 | up   |
| 6594469 | 7200129 | 1375997 | --- | --- | --- | 1,27 | down |
| 6594506 | 7075445 | 1069358 | --- | --- | --- | 1,10 | up   |
| 6594550 | 7059020 | 1029352 | --- | --- | --- | 1,49 | up   |
| 6594595 | 7058813 | 1028905 | --- | --- | --- | 1,04 | down |
| 6594638 | 7332970 | 1702533 | --- | --- | --- | 1,09 | down |
| 6594656 | 7338807 | 1716791 | --- | --- | --- | 1,10 | down |
| 6594686 | 7279303 | 1571205 | --- | --- | --- | 1,57 | down |
| 6594799 | 7030454 | 961546  | --- | --- | --- | 1,44 | up   |
| 6594831 | 7092549 | 1109169 | --- | --- | --- | 1,33 | down |
| 6595000 | 7129841 | 1200833 | --- | --- | --- | 1,04 | up   |
| 6595107 | 7127691 | 1195630 | --- | --- | --- | 1,24 | up   |

|         |         |         |     |     |     |      |      |
|---------|---------|---------|-----|-----|-----|------|------|
| 6595241 | 7379957 | 1820635 | --- | --- | --- | 1,42 | down |
| 6595256 | 7074989 | 1068379 | --- | --- | --- | 1,25 | up   |
| 6595342 | 7298920 | 1618822 | --- | --- | --- | 1,14 | up   |
| 6595562 | 7295410 | 1609765 | --- | --- | --- | 1,07 | up   |
| 6595725 | 7049118 | 1007772 | --- | --- | --- | 1,11 | down |
| 6595847 | 7171034 | 1302293 | --- | --- | --- | 1,07 | down |
| 6595888 | 7060851 | 1033412 | --- | --- | --- | 2,14 | down |
| 6595895 | 7293049 | 1603887 | --- | --- | --- | 1,81 | up   |
| 6596055 | 7326612 | 1687187 | --- | --- | --- | 1,42 | down |
| 6596072 | 7142416 | 1231814 | --- | --- | --- | 2,27 | up   |
| 6596097 | 7087965 | 1098038 | --- | --- | --- | 1,10 | down |
| 6596106 | 7031618 | 964206  | --- | --- | --- | 1,08 | down |
| 6596275 | 7180861 | 1327223 | --- | --- | --- | 2,32 | up   |
| 6596298 | 7097680 | 1121728 | --- | --- | --- | 1,27 | down |
| 6596385 | 7380497 | 1821847 | --- | --- | --- | 1,11 | up   |
| 6596392 | 7096924 | 1119615 | --- | --- | --- | 1,31 | up   |
| 6596527 | 7039463 | 984254  | --- | --- | --- | 1,14 | down |
| 6596550 | 7251608 | 1501453 | --- | --- | --- | 1,03 | up   |
| 6596624 | 7071714 | 1060364 | --- | --- | --- | 1,09 | up   |
| 6596628 | 7027797 | 956281  | --- | --- | --- | 1,55 | up   |
| 6596678 | 7177520 | 1318612 | --- | --- | --- | 1,06 | down |
| 6596786 | 7052567 | 1015257 | --- | --- | --- | 1,03 | up   |
| 6596805 | 7188829 | 1346667 | --- | --- | --- | 1,17 | up   |
| 6596839 | 7235069 | 1460990 | --- | --- | --- | 1,38 | down |
| 6596858 | 7267802 | 1541743 | --- | --- | --- | 1,36 | up   |
| 6597001 | 7050167 | 1009827 | --- | --- | --- | 1,13 | up   |
| 6597007 | 7378546 | 1817609 | --- | --- | --- | 1,41 | up   |
| 6597092 | 7354688 | 1756372 | --- | --- | --- | 1,15 | up   |
| 6597122 | 7039223 | 983552  | --- | --- | --- | 1,13 | up   |
| 6597173 | 7038530 | 981858  | --- | --- | --- | 1,25 | down |
| 6597346 | 7266532 | 1538309 | --- | --- | --- | 1,01 | down |
| 6597364 | 7341397 | 1723631 | --- | --- | --- | 1,11 | up   |
| 6597371 | 7228530 | 1443826 | --- | --- | --- | 1,08 | down |
| 6597512 | 7285688 | 1586193 | --- | --- | --- | 1,30 | up   |
| 6597645 | 7148978 | 1248480 | --- | --- | --- | 1,03 | down |
| 6597698 | 7224166 | 1432687 | --- | --- | --- | 1,58 | down |
| 6597934 | 7254040 | 1507607 | --- | --- | --- | 1,24 | up   |
| 6598076 | 7069830 | 1055615 | --- | --- | --- | 1,10 | up   |
| 6598132 | 7159177 | 1273345 | --- | --- | --- | 1,19 | up   |
| 6598197 | 7243130 | 1480895 | --- | --- | --- | 1,04 | up   |
| 6598200 | 7340258 | 1720734 | --- | --- | --- | 1,24 | down |
| 6598257 | 7338807 | 1716802 | --- | --- | --- | 1,04 | up   |
| 6598583 | 7323560 | 1680032 | --- | --- | --- | 1,15 | up   |
| 6598688 | 7341397 | 1723643 | --- | --- | --- | 1,32 | up   |
| 6598718 | 7256191 | 1512862 | --- | --- | --- | 1,03 | down |
| 6598832 | 7065266 | 1044576 | --- | --- | --- | 2,19 | up   |
| 6598911 | 7186440 | 1341256 | --- | --- | --- | 1,38 | up   |
| 6598939 | 7371446 | 1800083 | --- | --- | --- | 1,18 | up   |
| 6599043 | 7030127 | 960858  | --- | --- | --- | 1,45 | up   |
| 6599067 | 7209927 | 1398922 | --- | --- | --- | 1,25 | down |
| 6599116 | 7037764 | 979976  | --- | --- | --- | 1,37 | up   |
| 6599194 | 7149817 | 1250312 | --- | --- | --- | 1,11 | down |
| 6599217 | 7380497 | 1821872 | --- | --- | --- | 1,13 | up   |
| 6599244 | 7049118 | 1007801 | --- | --- | --- | 1,17 | down |
| 6599364 | 7291853 | 1600977 | --- | --- | --- | 1,75 | down |
| 6599869 | 7071264 | 1059362 | --- | --- | --- | 1,27 | down |



|         |         |         |     |     |     |      |      |
|---------|---------|---------|-----|-----|-----|------|------|
| 6599949 | 7172988 | 1307294 | --- | --- | --- | 1,50 | down |
| 6600073 | 7213908 | 1407768 | --- | --- | --- | 1,09 | up   |
| 6600195 | 7083030 | 1086262 | --- | --- | --- | 1,43 | up   |
| 6600219 | 7334347 | 1705758 | --- | --- | --- | 1,22 | down |
| 6600301 | 7243130 | 1480880 | --- | --- | --- | 1,18 | down |
| 6600378 | 7068697 | 1052760 | --- | --- | --- | 1,04 | up   |
| 6600431 | 7182679 | 1332419 | --- | --- | --- | 1,87 | down |
| 6600616 | 7217321 | 1416030 | --- | --- | --- | 1,13 | down |
| 6600737 | 7092965 | 1110165 | --- | --- | --- | 1,11 | up   |
| 6600831 | 7031774 | 964727  | --- | --- | --- | 1,14 | down |
| 6600916 | 7030233 | 961175  | --- | --- | --- | 1,09 | up   |
| 6601006 | 7350237 | 1745485 | --- | --- | --- | 1,05 | down |
| 6601022 | 7288063 | 1591924 | --- | --- | --- | 1,24 | down |
| 6601027 | 7232029 | 1452788 | --- | --- | --- | 1,03 | up   |
| 6601105 | 7384365 | 1830271 | --- | --- | --- | 1,11 | down |
| 6601110 | 7087805 | 1097455 | --- | --- | --- | 1,03 | up   |
| 6601141 | 7068259 | 1051655 | --- | --- | --- | 1,30 | up   |
| 6601266 | 7073950 | 1065907 | --- | --- | --- | 1,46 | up   |
| 6601326 | 7117158 | 1170032 | --- | --- | --- | 1,01 | up   |
| 6601378 | 7279881 | 1572709 | --- | --- | --- | 1,69 | up   |
| 6601389 | 7293234 | 1604352 | --- | --- | --- | 1,10 | up   |
| 6601437 | 7363674 | 1778434 | --- | --- | --- | 1,11 | up   |
| 6601469 | 7198210 | 1370966 | --- | --- | --- | 1,05 | down |
| 6601489 | 7320337 | 1673331 | --- | --- | --- | 2,31 | down |
| 6601919 | 7032204 | 966152  | --- | --- | --- | 1,00 | down |
| 6601985 | 7056333 | 1023685 | --- | --- | --- | 1,17 | up   |
| 6602020 | 7067670 | 1050311 | --- | --- | --- | 1,51 | up   |
| 6602249 | 7112672 | 1158995 | --- | --- | --- | 1,10 | down |
| 6602252 | 7236254 | 1464068 | --- | --- | --- | 1,12 | up   |
| 6602333 | 7319259 | 1670389 | --- | --- | --- | 2,05 | down |
| 6602442 | 7337845 | 1714336 | --- | --- | --- | 1,35 | up   |
| 6602445 | 7274780 | 1559251 | --- | --- | --- | 1,11 | down |
| 6602521 | 7236962 | 1465627 | --- | --- | --- | 2,11 | up   |
| 6602581 | 7059766 | 1030974 | --- | --- | --- | 1,58 | up   |
| 6602643 | 7266778 | 1538857 | --- | --- | --- | 2,02 | up   |
| 6602673 | 7123421 | 1185828 | --- | --- | --- | 1,10 | down |
| 6602845 | 7287222 | 1589744 | --- | --- | --- | 1,54 | down |
| 6602893 | 7088164 | 1098492 | --- | --- | --- | 1,14 | down |
| 6602936 | 7311218 | 1650363 | --- | --- | --- | 1,13 | down |
| 6603057 | 7340757 | 1721890 | --- | --- | --- | 1,13 | up   |
| 6603205 | 7065357 | 1044741 | --- | --- | --- | 1,38 | down |
| 6603225 | 7243363 | 1481627 | --- | --- | --- | 1,50 | down |
| 6603333 | 7326612 | 1687188 | --- | --- | --- | 1,04 | up   |
| 6603373 | 7050557 | 1010790 | --- | --- | --- | 1,21 | up   |
| 6603519 | 7384365 | 1830274 | --- | --- | --- | 1,17 | down |
| 6603635 | 7365183 | 1781900 | --- | --- | --- | 1,63 | up   |
| 6603713 | 7097454 | 1120881 | --- | --- | --- | 1,05 | up   |
| 6603784 | 7094139 | 1112912 | --- | --- | --- | 1,25 | up   |
| 6603811 | 7297154 | 1614216 | --- | --- | --- | 1,15 | down |
| 6603934 | 7315206 | 1660018 | --- | --- | --- | 2,44 | up   |
| 6603939 | 7323083 | 1678852 | --- | --- | --- | 1,23 | down |
| 6603952 | 7245874 | 1487596 | --- | --- | --- | 1,39 | down |
| 6604074 | 7074132 | 1066312 | --- | --- | --- | 1,39 | up   |
| 6604192 | 7247229 | 1490548 | --- | --- | --- | 1,10 | down |
| 6604200 | 7041609 | 989559  | --- | --- | --- | 1,19 | up   |
| 6604201 | 7360486 | 1771012 | --- | --- | --- | 1,04 | down |

|         |         |         |     |     |     |      |      |
|---------|---------|---------|-----|-----|-----|------|------|
| 6604282 | 7248964 | 1494945 | --- | --- | --- | 1,12 | down |
| 6604555 | 7186106 | 1340493 | --- | --- | --- | 1,37 | up   |
| 6604583 | 7146093 | 1240939 | --- | --- | --- | 1,28 | up   |
| 6604591 | 7301890 | 1626682 | --- | --- | --- | 1,07 | up   |
| 6604750 | 7236395 | 1464343 | --- | --- | --- | 1,01 | down |
| 6604811 | 7363132 | 1776956 | --- | --- | --- | 1,47 | down |
| 6604849 | 7059449 | 1030306 | --- | --- | --- | 1,54 | down |
| 6604878 | 7031325 | 963574  | --- | --- | --- | 1,11 | up   |
| 6604883 | 7141421 | 1229477 | --- | --- | --- | 1,65 | up   |
| 6604891 | 7243253 | 1481223 | --- | --- | --- | 1,41 | up   |
| 6604925 | 7038969 | 982978  | --- | --- | --- | 1,04 | down |
| 6604928 | 7249503 | 1496200 | --- | --- | --- | 1,66 | up   |
| 6604973 | 7072552 | 1062143 | --- | --- | --- | 1,50 | down |
| 6604995 | 7211830 | 1402916 | --- | --- | --- | 1,02 | down |
| 6605020 | 7360213 | 1770193 | --- | --- | --- | 1,00 | down |
| 6605072 | 7341546 | 1723961 | --- | --- | --- | 1,01 | down |
| 6605090 | 7298692 | 1618403 | --- | --- | --- | 1,01 | down |
| 6605176 | 7343868 | 1729855 | --- | --- | --- | 1,08 | down |
| 6605320 | 7092965 | 1110201 | --- | --- | --- | 1,00 | up   |
| 6605354 | 7059375 | 1030054 | --- | --- | --- | 1,72 | up   |
| 6605476 | 7218728 | 1419915 | --- | --- | --- | 1,69 | down |
| 6605748 | 7303616 | 1631340 | --- | --- | --- | 1,08 | down |
| 6605762 | 7177520 | 1318612 | --- | --- | --- | 1,04 | down |
| 6605810 | 7264808 | 1534466 | --- | --- | --- | 1,01 | up   |
| 6605900 | 7059449 | 1030307 | --- | --- | --- | 1,22 | up   |
| 6605951 | 7240569 | 1475453 | --- | --- | --- | 2,20 | down |
| 6606023 | 7350237 | 1745494 | --- | --- | --- | 1,78 | up   |
| 6606073 | 7156052 | 1265763 | --- | --- | --- | 1,10 | down |
| 6606076 | 7350237 | 1745487 | --- | --- | --- | 1,54 | up   |
| 6606192 | 7156061 | 1265830 | --- | --- | --- | 2,14 | down |
| 6606255 | 7156061 | 1265832 | --- | --- | --- | 1,06 | up   |
| 6606294 | 7047865 | 1005356 | --- | --- | --- | 1,26 | down |
| 6606424 | 7144389 | 1236777 | --- | --- | --- | 1,04 | down |
| 6606519 | 7235323 | 1461557 | --- | --- | --- | 1,23 | up   |
| 6606561 | 7039223 | 983557  | --- | --- | --- | 1,38 | down |
| 6606624 | 7323522 | 1679840 | --- | --- | --- | 1,27 | down |
| 6606711 | 7280743 | 1574533 | --- | --- | --- | 1,89 | up   |
| 6606718 | 7089381 | 1102067 | --- | --- | --- | 1,24 | down |
| 6606728 | 7042382 | 991286  | --- | --- | --- | 1,34 | up   |
| 6606759 | 7314270 | 1657745 | --- | --- | --- | 1,26 | down |
| 6606791 | 7092406 | 1108782 | --- | --- | --- | 1,02 | up   |
| 6606819 | 7240569 | 1475385 | --- | --- | --- | 1,08 | up   |
| 6606934 | 7384073 | 1829474 | --- | --- | --- | 1,22 | down |
| 6606943 | 7099271 | 1125922 | --- | --- | --- | 1,01 | down |
| 6606946 | 7168858 | 1296842 | --- | --- | --- | 1,00 | up   |
| 6607119 | 7383655 | 1828573 | --- | --- | --- | 1,16 | down |
| 6607131 | 7111361 | 1155580 | --- | --- | --- | 1,04 | down |
| 6607148 | 7339379 | 1718312 | --- | --- | --- | 1,34 | up   |
| 6607217 | 7147275 | 1243985 | --- | --- | --- | 1,31 | up   |
| 6607225 | 7076160 | 1070910 | --- | --- | --- | 1,20 | up   |
| 6607262 | 7311218 | 1650362 | --- | --- | --- | 1,18 | up   |
| 6607332 | 7196803 | 1367333 | --- | --- | --- | 1,52 | up   |
| 6607419 | 7239752 | 1473160 | --- | --- | --- | 1,25 | up   |
| 6607431 | 7117158 | 1170037 | --- | --- | --- | 1,23 | down |
| 6607453 | 7155286 | 1263908 | --- | --- | --- | 1,54 | down |
| 6607461 | 7238115 | 1468590 | --- | --- | --- | 1,21 | up   |

|         |         |         |     |     |     |      |      |
|---------|---------|---------|-----|-----|-----|------|------|
| 6607571 | 7132125 | 1206601 | --- | --- | --- | 1,07 | down |
| 6607877 | 7102510 | 1133874 | --- | --- | --- | 1,36 | down |
| 6607898 | 7122486 | 1183418 | --- | --- | --- | 1,01 | up   |
| 6608091 | 7335091 | 1707326 | --- | --- | --- | 1,19 | up   |
| 6608155 | 7059766 | 1030970 | --- | --- | --- | 1,98 | up   |
| 6608249 | 7149817 | 1250307 | --- | --- | --- | 1,41 | up   |
| 6608438 | 7113483 | 1161000 | --- | --- | --- | 2,02 | up   |
| 6608465 | 7095021 | 1115132 | --- | --- | --- | 1,01 | down |
| 6608614 | 7069830 | 1055596 | --- | --- | --- | 1,15 | up   |
| 6608632 | 7364346 | 1779983 | --- | --- | --- | 1,11 | up   |
| 6608754 | 7207069 | 1392027 | --- | --- | --- | 1,67 | down |
| 6608777 | 7182056 | 1330579 | --- | --- | --- | 1,11 | up   |
| 6608803 | 7034756 | 973211  | --- | --- | --- | 1,14 | down |
| 6608935 | 7330737 | 1697222 | --- | --- | --- | 1,19 | down |
| 6608947 | 7050557 | 1010796 | --- | --- | --- | 1,02 | down |
| 6608952 | 7188909 | 1346797 | --- | --- | --- | 1,27 | up   |
| 6609169 | 7351949 | 1749804 | --- | --- | --- | 1,49 | down |
| 6609193 | 7028624 | 957995  | --- | --- | --- | 1,16 | up   |
| 6609233 | 7322260 | 1677077 | --- | --- | --- | 1,27 | up   |
| 6609351 | 7027795 | 956274  | --- | --- | --- | 1,19 | down |
| 6609397 | 7197056 | 1367848 | --- | --- | --- | 1,04 | down |
| 6609427 | 7249503 | 1496238 | --- | --- | --- | 1,26 | down |
| 6609448 | 7329135 | 1693489 | --- | --- | --- | 2,66 | down |
| 6609457 | 7189689 | 1349043 | --- | --- | --- | 1,12 | up   |
| 6609598 | 7102708 | 1134318 | --- | --- | --- | 2,17 | up   |
| 6609618 | 7252382 | 1503510 | --- | --- | --- | 1,19 | up   |
| 6609765 | 7233440 | 1456825 | --- | --- | --- | 1,08 | up   |
| 6609853 | 7049399 | 1008396 | --- | --- | --- | 1,10 | up   |
| 6609860 | 7059766 | 1030972 | --- | --- | --- | 1,15 | up   |
| 6609927 | 7323545 | 1679978 | --- | --- | --- | 1,91 | up   |
| 6609936 | 7323545 | 1679980 | --- | --- | --- | 1,06 | down |
| 6609944 | 7352100 | 1750209 | --- | --- | --- | 1,40 | down |
| 6610035 | 7349804 | 1744567 | --- | --- | --- | 1,02 | down |
| 6610053 | 7301140 | 1624593 | --- | --- | --- | 1,18 | down |
| 6610096 | 7189689 | 1349058 | --- | --- | --- | 1,12 | up   |
| 6610115 | 7213908 | 1407732 | --- | --- | --- | 1,05 | up   |
| 6610239 | 7340304 | 1720865 | --- | --- | --- | 2,29 | down |
| 6610261 | 7279533 | 1571917 | --- | --- | --- | 1,52 | up   |
| 6610270 | 7069253 | 1054164 | --- | --- | --- | 1,11 | up   |
| 6610311 | 7325674 | 1685230 | --- | --- | --- | 1,15 | up   |
| 6610497 | 7136062 | 1216276 | --- | --- | --- | 1,60 | up   |
| 6610514 | 7086751 | 1094622 | --- | --- | --- | 1,03 | down |
| 6610577 | 7339379 | 1718361 | --- | --- | --- | 1,23 | down |
| 6611039 | 7361042 | 1772279 | --- | --- | --- | 2,51 | up   |
| 6611127 | 7274780 | 1559234 | --- | --- | --- | 1,22 | up   |
| 6611265 | 7373417 | 1805104 | --- | --- | --- | 1,25 | up   |
| 6611373 | 7341002 | 1722533 | --- | --- | --- | 1,39 | up   |
| 6611628 | 7240665 | 1475814 | --- | --- | --- | 1,00 | up   |
| 6611723 | 7293402 | 1604805 | --- | --- | --- | 1,04 | down |
| 6611731 | 7299512 | 1620555 | --- | --- | --- | 1,05 | down |
| 6611786 | 7274780 | 1559256 | --- | --- | --- | 1,33 | down |
| 6611837 | 7098126 | 1122976 | --- | --- | --- | 2,78 | up   |
| 6611890 | 7070836 | 1058340 | --- | --- | --- | 1,05 | up   |
| 6611965 | 7339732 | 1719210 | --- | --- | --- | 1,27 | up   |
| 6611974 | 7374362 | 1807632 | --- | --- | --- | 1,04 | up   |
| 6612042 | 7327169 | 1688457 | --- | --- | --- | 1,91 | up   |

|         |         |         |     |     |     |      |      |
|---------|---------|---------|-----|-----|-----|------|------|
| 6612080 | 7139708 | 1225051 | --- | --- | --- | 1,73 | down |
| 6612089 | 7180943 | 1327442 | --- | --- | --- | 1,01 | up   |
| 6612105 | 7059020 | 1029338 | --- | --- | --- | 1,19 | up   |
| 6612265 | 7373906 | 1806371 | --- | --- | --- | 1,25 | up   |
| 6612396 | 7196187 | 1365952 | --- | --- | --- | 1,38 | up   |
| 6612448 | 7159027 | 1272740 | --- | --- | --- | 1,57 | down |
| 6612517 | 7096859 | 1119332 | --- | --- | --- | 1,53 | down |
| 6612549 | 7369712 | 1794833 | --- | --- | --- | 1,43 | up   |
| 6612585 | 7234434 | 1459443 | --- | --- | --- | 1,52 | up   |
| 6612588 | 7101258 | 1130571 | --- | --- | --- | 1,03 | down |
| 6612610 | 7120235 | 1177959 | --- | --- | --- | 1,06 | down |
| 6612611 | 7167876 | 1294068 | --- | --- | --- | 1,98 | down |
| 6612666 | 7178060 | 1320163 | --- | --- | --- | 1,53 | down |
| 6612877 | 7031774 | 964662  | --- | --- | --- | 1,40 | up   |
| 6612942 | 7099294 | 1126098 | --- | --- | --- | 1,01 | up   |
| 6612955 | 7049118 | 1007763 | --- | --- | --- | 1,12 | up   |
| 6613020 | 7293049 | 1603883 | --- | --- | --- | 1,13 | up   |
| 6613051 | 7052385 | 1014778 | --- | --- | --- | 1,48 | down |
| 6613067 | 7281507 | 1576717 | --- | --- | --- | 1,21 | up   |
| 6613195 | 7233359 | 1456515 | --- | --- | --- | 1,36 | up   |
| 6613366 | 7181193 | 1328305 | --- | --- | --- | 1,09 | down |
| 6613559 | 7359659 | 1768813 | --- | --- | --- | 1,05 | up   |
| 6613587 | 7052331 | 1014567 | --- | --- | --- | 1,11 | down |
| 6613599 | 7189689 | 1349053 | --- | --- | --- | 1,05 | up   |
| 6613620 | 7236395 | 1464339 | --- | --- | --- | 1,24 | down |
| 6613633 | 7099973 | 1127535 | --- | --- | --- | 1,10 | down |
| 6613658 | 7330396 | 1696369 | --- | --- | --- | 1,47 | up   |
| 6613798 | 7247228 | 1490523 | --- | --- | --- | 1,37 | up   |
| 6613801 | 7258670 | 1519341 | --- | --- | --- | 2,22 | up   |
| 6613915 | 7069253 | 1054154 | --- | --- | --- | 1,01 | down |
| 6614057 | 7067828 | 1050782 | --- | --- | --- | 1,04 | down |
| 6614157 | 7065827 | 1045727 | --- | --- | --- | 1,39 | down |
| 6614187 | 7307721 | 1641990 | --- | --- | --- | 1,19 | up   |
| 6614203 | 7115362 | 1165613 | --- | --- | --- | 1,07 | up   |
| 6614221 | 7259923 | 1522525 | --- | --- | --- | 2,23 | up   |
| 6614431 | 7088164 | 1098479 | --- | --- | --- | 1,11 | up   |
| 6614440 | 7051009 | 1011775 | --- | --- | --- | 1,11 | down |
| 6614459 | 7318596 | 1668925 | --- | --- | --- | 1,23 | up   |
| 6614470 | 7088164 | 1098481 | --- | --- | --- | 2,25 | down |
| 6614490 | 7285239 | 1585483 | --- | --- | --- | 1,21 | up   |
| 6614696 | 7065655 | 1045264 | --- | --- | --- | 1,27 | up   |
| 6614707 | 7273223 | 1555871 | --- | --- | --- | 1,43 | down |
| 6614780 | 7228530 | 1443902 | --- | --- | --- | 1,01 | up   |
| 6614817 | 7113483 | 1161022 | --- | --- | --- | 1,39 | up   |
| 6614898 | 7266706 | 1538746 | --- | --- | --- | 1,19 | up   |
| 6614935 | 7059020 | 1029341 | --- | --- | --- | 1,16 | up   |
| 6614987 | 7112225 | 1157556 | --- | --- | --- | 1,02 | up   |
| 6614996 | 7157341 | 1269192 | --- | --- | --- | 1,08 | up   |
| 6615058 | 7287222 | 1589738 | --- | --- | --- | 1,12 | up   |
| 6615099 | 7033672 | 970362  | --- | --- | --- | 1,07 | up   |
| 6615130 | 7234195 | 1458976 | --- | --- | --- | 1,13 | up   |
| 6615162 | 7031576 | 964108  | --- | --- | --- | 1,02 | down |
| 6615268 | 7232340 | 1453531 | --- | --- | --- | 1,15 | down |
| 6615317 | 7041584 | 989465  | --- | --- | --- | 1,28 | up   |
| 6615318 | 7258670 | 1519343 | --- | --- | --- | 1,21 | up   |
| 6615393 | 7344406 | 1731204 | --- | --- | --- | 1,05 | down |

|         |         |         |     |     |     |      |      |
|---------|---------|---------|-----|-----|-----|------|------|
| 6615589 | 7190534 | 1351229 | --- | --- | --- | 1,76 | down |
| 6615706 | 7376820 | 1813423 | --- | --- | --- | 1,31 | up   |
| 6615732 | 7181105 | 1327967 | --- | --- | --- | 1,38 | down |
| 6615756 | 7243130 | 1480941 | --- | --- | --- | 1,07 | up   |
| 6615920 | 7086044 | 1092951 | --- | --- | --- | 2,12 | down |
| 6615929 | 7033672 | 970353  | --- | --- | --- | 1,02 | up   |
| 6616075 | 7067828 | 1050783 | --- | --- | --- | 1,03 | up   |
| 6616430 | 7055876 | 1022521 | --- | --- | --- | 1,03 | down |
| 6616525 | 7339379 | 1718329 | --- | --- | --- | 1,13 | up   |
| 6616608 | 7269637 | 1546236 | --- | --- | --- | 1,30 | down |
| 6616617 | 7291054 | 1599403 | --- | --- | --- | 1,01 | up   |
| 6616629 | 7243603 | 1482286 | --- | --- | --- | 1,34 | up   |
| 6616674 | 7319937 | 1672250 | --- | --- | --- | 1,00 | down |
| 6616731 | 7096589 | 1118529 | --- | --- | --- | 1,33 | down |
| 6616803 | 7303616 | 1631347 | --- | --- | --- | 1,00 | down |
| 6616992 | 7038153 | 981156  | --- | --- | --- | 1,40 | down |
| 6617054 | 7351951 | 1749819 | --- | --- | --- | 1,55 | down |
| 6617065 | 7336250 | 1710153 | --- | --- | --- | 1,34 | up   |
| 6617111 | 7037495 | 979314  | --- | --- | --- | 1,03 | down |
| 6617141 | 7364346 | 1779965 | --- | --- | --- | 1,06 | down |
| 6617270 | 7349817 | 1744644 | --- | --- | --- | 1,06 | down |
| 6617278 | 7248790 | 1494485 | --- | --- | --- | 1,09 | down |
| 6617290 | 7192320 | 1356046 | --- | --- | --- | 1,02 | down |
| 6617518 | 7237719 | 1467495 | --- | --- | --- | 1,35 | down |
| 6617553 | 7384509 | 1830755 | --- | --- | --- | 1,11 | up   |
| 6617621 | 7233440 | 1456890 | --- | --- | --- | 1,02 | up   |
| 6617661 | 7236987 | 1465738 | --- | --- | --- | 1,15 | up   |
| 6617686 | 7340838 | 1722083 | --- | --- | --- | 1,02 | down |
| 6617725 | 7302018 | 1626962 | --- | --- | --- | 1,13 | up   |
| 6617788 | 7339732 | 1719238 | --- | --- | --- | 2,40 | down |
| 6617836 | 7230611 | 1448821 | --- | --- | --- | 1,05 | up   |
| 6617932 | 7193987 | 1360669 | --- | --- | --- | 1,16 | down |
| 6618177 | 7207069 | 1392009 | --- | --- | --- | 2,05 | up   |
| 6618189 | 7078666 | 1076513 | --- | --- | --- | 1,50 | up   |
| 6618199 | 7274892 | 1559554 | --- | --- | --- | 1,01 | down |
| 6618204 | 7031774 | 964690  | --- | --- | --- | 1,02 | up   |
| 6618237 | 7036559 | 977258  | --- | --- | --- | 1,08 | up   |
| 6618273 | 7142770 | 1232669 | --- | --- | --- | 1,26 | up   |
| 6618282 | 7147809 | 1245467 | --- | --- | --- | 1,99 | down |
| 6618314 | 7240569 | 1475513 | --- | --- | --- | 1,01 | up   |
| 6618322 | 7340757 | 1721892 | --- | --- | --- | 1,17 | down |
| 6618328 | 7170764 | 1301490 | --- | --- | --- | 1,03 | up   |
| 6618519 | 7103811 | 1137053 | --- | --- | --- | 1,00 | down |
| 6618530 | 7070455 | 1057349 | --- | --- | --- | 1,00 | up   |
| 6618546 | 7132125 | 1206636 | --- | --- | --- | 1,05 | up   |
| 6618570 | 7320234 | 1673043 | --- | --- | --- | 1,15 | down |
| 6618611 | 7099294 | 1126103 | --- | --- | --- | 1,07 | down |
| 6618765 | 7080106 | 1079724 | --- | --- | --- | 1,10 | up   |
| 6618787 | 7065266 | 1044579 | --- | --- | --- | 1,53 | down |
| 6618915 | 7358859 | 1766965 | --- | --- | --- | 1,00 | up   |
| 6618986 | 7251608 | 1501464 | --- | --- | --- | 1,14 | up   |
| 6619278 | 7314115 | 1657313 | --- | --- | --- | 2,03 | down |
| 6619304 | 7082098 | 1084123 | --- | --- | --- | 3,00 | down |
| 6619389 | 7280743 | 1574514 | --- | --- | --- | 1,61 | down |
| 6619449 | 7236851 | 1465381 | --- | --- | --- | 2,10 | down |
| 6619542 | 7248790 | 1494525 | --- | --- | --- | 1,40 | down |

|         |         |         |     |     |     |      |      |
|---------|---------|---------|-----|-----|-----|------|------|
| 6619576 | 7054958 | 1020576 | --- | --- | --- | 1,32 | down |
| 6619627 | 7146245 | 1241378 | --- | --- | --- | 2,18 | down |
| 6619631 | 7286807 | 1588822 | --- | --- | --- | 1,19 | down |
| 6619753 | 7276650 | 1564135 | --- | --- | --- | 1,25 | up   |
| 6619815 | 7093936 | 1112472 | --- | --- | --- | 1,22 | up   |
| 6619857 | 7365183 | 1781919 | --- | --- | --- | 1,02 | up   |
| 6619863 | 7339379 | 1718351 | --- | --- | --- | 1,24 | down |
| 6619907 | 7167507 | 1293123 | --- | --- | --- | 1,02 | down |
| 6619914 | 7363768 | 1778604 | --- | --- | --- | 1,08 | down |
| 6620105 | 7156372 | 1266705 | --- | --- | --- | 1,88 | up   |
| 6620269 | 7373678 | 1805859 | --- | --- | --- | 1,35 | down |
| 6620325 | 7235426 | 1461846 | --- | --- | --- | 1,15 | down |
| 6620553 | 7301890 | 1626680 | --- | --- | --- | 1,35 | up   |
| 6620669 | 7248790 | 1494486 | --- | --- | --- | 1,47 | up   |
| 6620795 | 7175368 | 1313284 | --- | --- | --- | 1,03 | up   |
| 6620837 | 7370128 | 1796170 | --- | --- | --- | 1,45 | down |
| 6620941 | 7082098 | 1084122 | --- | --- | --- | 1,24 | down |
| 6621173 | 7265259 | 1535437 | --- | --- | --- | 1,42 | up   |
| 6621239 | 7353712 | 1753959 | --- | --- | --- | 1,22 | up   |
| 6621410 | 7115880 | 1166818 | --- | --- | --- | 1,17 | up   |
| 6621421 | 7098366 | 1123608 | --- | --- | --- | 1,04 | up   |
| 6621463 | 7098451 | 1123822 | --- | --- | --- | 1,15 | up   |
| 6621485 | 7374740 | 1808633 | --- | --- | --- | 1,20 | down |
| 6621671 | 7174149 | 1310517 | --- | --- | --- | 1,35 | up   |
| 6621829 | 7132263 | 1206897 | --- | --- | --- | 1,23 | up   |
| 6621967 | 7211389 | 1402112 | --- | --- | --- | 1,34 | up   |
| 6622047 | 7350993 | 1747515 | --- | --- | --- | 1,16 | up   |
| 6622056 | 7143455 | 1234733 | --- | --- | --- | 1,33 | down |
| 6622090 | 7310670 | 1648980 | --- | --- | --- | 1,20 | up   |
| 6622130 | 7343052 | 1727503 | --- | --- | --- | 1,14 | down |
| 6622209 | 7240569 | 1475327 | --- | --- | --- | 1,44 | down |
| 6622219 | 7197820 | 1370087 | --- | --- | --- | 3,50 | down |
| 6622252 | 7179785 | 1324498 | --- | --- | --- | 2,22 | down |
| 6622256 | 7049399 | 1008376 | --- | --- | --- | 1,19 | down |
| 6622314 | 7025652 | 950220  | --- | --- | --- | 1,20 | up   |
| 6622319 | 7249503 | 1496209 | --- | --- | --- | 1,05 | up   |
| 6622569 | 7058713 | 1028667 | --- | --- | --- | 1,13 | down |
| 6622587 | 7221552 | 1426615 | --- | --- | --- | 1,31 | down |
| 6622682 | 7349946 | 1744951 | --- | --- | --- | 1,04 | up   |
| 6622755 | 7340838 | 1722071 | --- | --- | --- | 1,21 | down |
| 6622756 | 7266778 | 1538854 | --- | --- | --- | 1,42 | up   |
| 6622800 | 7049399 | 1008418 | --- | --- | --- | 1,18 | down |
| 6622884 | 7344530 | 1731567 | --- | --- | --- | 1,66 | up   |
| 6622976 | 7269314 | 1545608 | --- | --- | --- | 1,43 | up   |
| 6623029 | 7329075 | 1693377 | --- | --- | --- | 1,74 | down |
| 6623107 | 7094158 | 1112974 | --- | --- | --- | 2,03 | down |
| 6623140 | 7253408 | 1505934 | --- | --- | --- | 1,09 | down |
| 6623183 | 7193056 | 1358269 | --- | --- | --- | 1,23 | down |
| 6623272 | 7373633 | 1805697 | --- | --- | --- | 1,23 | down |
| 6623346 | 7280743 | 1574540 | --- | --- | --- | 1,66 | up   |
| 6623432 | 7092549 | 1109143 | --- | --- | --- | 2,88 | down |
| 6623484 | 7236254 | 1464050 | --- | --- | --- | 1,01 | up   |
| 6623515 | 7305174 | 1635451 | --- | --- | --- | 4,82 | down |
| 6623575 | 7189689 | 1349048 | --- | --- | --- | 1,08 | up   |
| 6623580 | 7172066 | 1304744 | --- | --- | --- | 1,02 | down |
| 6623650 | 7181016 | 1327792 | --- | --- | --- | 1,04 | up   |

|         |         |         |     |     |     |      |      |
|---------|---------|---------|-----|-----|-----|------|------|
| 6623689 | 7070616 | 1057785 | --- | --- | --- | 1,12 | up   |
| 6623832 | 7086664 | 1094271 | --- | --- | --- | 1,07 | down |
| 6623853 | 7177520 | 1318614 | --- | --- | --- | 1,21 | down |
| 6624109 | 7142416 | 1231792 | --- | --- | --- | 1,09 | up   |
| 6624123 | 7174114 | 1310420 | --- | --- | --- | 1,63 | up   |
| 6624131 | 7035344 | 974297  | --- | --- | --- | 1,23 | up   |
| 6624202 | 7039821 | 985071  | --- | --- | --- | 1,79 | down |
| 6624229 | 7249737 | 1496747 | --- | --- | --- | 1,20 | up   |
| 6624248 | 7186688 | 1341845 | --- | --- | --- | 1,30 | up   |
| 6624255 | 7050655 | 1011011 | --- | --- | --- | 2,13 | down |
| 6624313 | 7286807 | 1588816 | --- | --- | --- | 1,11 | down |
| 6624338 | 7127540 | 1195277 | --- | --- | --- | 2,40 | up   |
| 6624444 | 7071969 | 1060895 | --- | --- | --- | 1,10 | down |
| 6624541 | 7337845 | 1714352 | --- | --- | --- | 1,11 | down |
| 6624560 | 7145669 | 1240016 | --- | --- | --- | 1,11 | down |
| 6624701 | 7097454 | 1120875 | --- | --- | --- | 1,47 | up   |
| 6624717 | 7319937 | 1672277 | --- | --- | --- | 1,11 | up   |
| 6624774 | 7224182 | 1432763 | --- | --- | --- | 1,25 | down |
| 6624807 | 7258670 | 1519355 | --- | --- | --- | 1,09 | down |
| 6624965 | 7230886 | 1449579 | --- | --- | --- | 1,03 | down |
| 6625148 | 7208330 | 1395089 | --- | --- | --- | 1,99 | down |
| 6625202 | 7280743 | 1574513 | --- | --- | --- | 2,23 | up   |
| 6625263 | 7120827 | 1179353 | --- | --- | --- | 1,04 | down |
| 6625311 | 7049399 | 1008330 | --- | --- | --- | 1,04 | up   |
| 6625312 | 7340304 | 1720852 | --- | --- | --- | 1,06 | down |
| 6625336 | 7040260 | 986100  | --- | --- | --- | 1,04 | up   |
| 6625404 | 7147809 | 1245448 | --- | --- | --- | 1,00 | up   |
| 6625555 | 7218259 | 1418785 | --- | --- | --- | 1,13 | down |
| 6625598 | 7333333 | 1703389 | --- | --- | --- | 1,18 | down |
| 6625628 | 7027797 | 956280  | --- | --- | --- | 1,08 | up   |
| 6625720 | 7127257 | 1194809 | --- | --- | --- | 1,06 | down |
| 6625731 | 7323545 | 1679970 | --- | --- | --- | 1,16 | down |
| 6625805 | 7195903 | 1365330 | --- | --- | --- | 1,10 | down |
| 6625883 | 7237719 | 1467507 | --- | --- | --- | 1,18 | up   |
| 6625896 | 7363674 | 1778435 | --- | --- | --- | 1,06 | down |
| 6625903 | 7230886 | 1449522 | --- | --- | --- | 1,17 | up   |
| 6625948 | 7083030 | 1086272 | --- | --- | --- | 1,03 | down |
| 6625966 | 7277783 | 1567470 | --- | --- | --- | 1,03 | down |
| 6625968 | 7059449 | 1030305 | --- | --- | --- | 1,59 | up   |
| 6625991 | 7189669 | 1348993 | --- | --- | --- | 1,11 | up   |
| 6626067 | 7292517 | 1602547 | --- | --- | --- | 1,09 | down |
| 6626152 | 7338807 | 1716833 | --- | --- | --- | 1,05 | up   |
| 6626262 | 7038610 | 982082  | --- | --- | --- | 1,03 | down |
| 6626323 | 7275674 | 1561667 | --- | --- | --- | 1,22 | up   |
| 6626338 | 7351951 | 1749814 | --- | --- | --- | 1,30 | down |
| 6626396 | 7267802 | 1541835 | --- | --- | --- | 1,04 | up   |
| 6626403 | 7033504 | 969851  | --- | --- | --- | 1,13 | up   |
| 6626494 | 7112225 | 1157609 | --- | --- | --- | 1,01 | up   |
| 6626569 | 7248790 | 1494501 | --- | --- | --- | 1,06 | up   |
| 6626646 | 7068086 | 1051205 | --- | --- | --- | 1,56 | down |
| 6626673 | 7060851 | 1033359 | --- | --- | --- | 1,06 | down |
| 6626713 | 7263401 | 1530956 | --- | --- | --- | 1,01 | up   |
| 6626725 | 7373038 | 1804293 | --- | --- | --- | 1,11 | down |
| 6626749 | 7236358 | 1464245 | --- | --- | --- | 1,91 | down |
| 6626778 | 7088164 | 1098492 | --- | --- | --- | 1,51 | up   |
| 6627216 | 7027795 | 956272  | --- | --- | --- | 1,04 | up   |

|         |         |         |     |     |     |      |      |
|---------|---------|---------|-----|-----|-----|------|------|
| 6627221 | 7243130 | 1480813 | --- | --- | --- | 1,10 | down |
| 6627289 | 7193644 | 1359709 | --- | --- | --- | 1,46 | down |
| 6627327 | 7312566 | 1653300 | --- | --- | --- | 1,93 | down |
| 6627334 | 7338807 | 1716792 | --- | --- | --- | 1,09 | up   |
| 6627367 | 7267802 | 1541739 | --- | --- | --- | 1,03 | down |
| 6627477 | 7355220 | 1758100 | --- | --- | --- | 1,14 | up   |
| 6627499 | 7240569 | 1475444 | --- | --- | --- | 1,37 | up   |
| 6627578 | 7038610 | 982090  | --- | --- | --- | 1,34 | down |
| 6627587 | 7363674 | 1778431 | --- | --- | --- | 1,04 | up   |
| 6627634 | 7276650 | 1564132 | --- | --- | --- | 1,53 | down |
| 6627639 | 7050167 | 1009822 | --- | --- | --- | 1,16 | up   |
| 6627802 | 7088625 | 1099863 | --- | --- | --- | 1,23 | down |
| 6627892 | 7361420 | 1773046 | --- | --- | --- | 1,11 | down |
| 6627924 | 7293454 | 1604950 | --- | --- | --- | 1,04 | down |
| 6627950 | 7084993 | 1090675 | --- | --- | --- | 1,18 | up   |
| 6628147 | 7033337 | 969486  | --- | --- | --- | 1,11 | down |
| 6628222 | 7351951 | 1749841 | --- | --- | --- | 1,21 | down |
| 6628267 | 7156052 | 1265768 | --- | --- | --- | 1,12 | down |
| 6628316 | 7217747 | 1417464 | --- | --- | --- | 1,33 | down |
| 6628439 | 7349946 | 1744952 | --- | --- | --- | 1,12 | down |
| 6628451 | 7156061 | 1265821 | --- | --- | --- | 1,17 | up   |
| 6628492 | 7232340 | 1453523 | --- | --- | --- | 1,39 | down |
| 6628494 | 7038153 | 981152  | --- | --- | --- | 1,39 | down |
| 6628511 | 7351951 | 1749827 | --- | --- | --- | 1,05 | up   |
| 6628544 | 7373678 | 1805853 | --- | --- | --- | 1,41 | down |
| 6628567 | 7337845 | 1714331 | --- | --- | --- | 1,12 | down |
| 6628626 | 7192914 | 1357822 | --- | --- | --- | 2,30 | up   |
| 6628692 | 7033672 | 970368  | --- | --- | --- | 1,16 | up   |
| 6628776 | 7192696 | 1357181 | --- | --- | --- | 1,05 | down |
| 6628799 | 7243363 | 1481594 | --- | --- | --- | 1,05 | up   |
| 6628807 | 7351953 | 1749862 | --- | --- | --- | 1,26 | down |
| 6628862 | 7112225 | 1157541 | --- | --- | --- | 1,00 | up   |
| 6628901 | 7059766 | 1030980 | --- | --- | --- | 1,44 | up   |
| 6628923 | 7254040 | 1507598 | --- | --- | --- | 1,04 | down |
| 6628941 | 7210387 | 1400046 | --- | --- | --- | 1,19 | up   |
| 6628973 | 7099973 | 1127535 | --- | --- | --- | 1,65 | down |
| 6629020 | 7151063 | 1253070 | --- | --- | --- | 1,74 | up   |
| 6629149 | 7344406 | 1731247 | --- | --- | --- | 1,05 | down |
| 6629258 | 7197820 | 1370098 | --- | --- | --- | 1,19 | down |
| 6629263 | 7321204 | 1675172 | --- | --- | --- | 1,09 | down |
| 6629292 | 7082098 | 1084124 | --- | --- | --- | 1,06 | up   |
| 6629315 | 7089762 | 1102987 | --- | --- | --- | 1,25 | down |
| 6629335 | 7341002 | 1722547 | --- | --- | --- | 1,29 | up   |
| 6629481 | 7247848 | 1492069 | --- | --- | --- | 1,24 | down |
| 6629492 | 7132024 | 1206338 | --- | --- | --- | 1,36 | up   |
| 6629498 | 7243647 | 1482421 | --- | --- | --- | 1,86 | down |
| 6629518 | 7245695 | 1487061 | --- | --- | --- | 1,25 | down |
| 6629543 | 7197820 | 1370099 | --- | --- | --- | 1,43 | down |
| 6629761 | 7361223 | 1772621 | --- | --- | --- | 1,22 | down |
| 6629845 | 7084193 | 1089095 | --- | --- | --- | 1,35 | up   |
| 6629897 | 7171047 | 1302370 | --- | --- | --- | 1,17 | down |
| 6629931 | 7328833 | 1692798 | --- | --- | --- | 1,01 | up   |
| 6629974 | 7236987 | 1465728 | --- | --- | --- | 1,06 | down |
| 6630012 | 7330737 | 1697222 | --- | --- | --- | 1,34 | up   |
| 6630026 | 7320337 | 1673317 | --- | --- | --- | 1,09 | down |
| 6630042 | 7147809 | 1245472 | --- | --- | --- | 1,32 | down |



|         |         |         |     |     |     |      |      |
|---------|---------|---------|-----|-----|-----|------|------|
| 6630058 | 7080106 | 1079725 | --- | --- | --- | 1,11 | up   |
| 6630110 | 7261766 | 1527154 | --- | --- | --- | 2,14 | down |
| 6630154 | 7206133 | 1389962 | --- | --- | --- | 1,13 | down |
| 6630208 | 7373417 | 1805096 | --- | --- | --- | 1,12 | up   |
| 6630218 | 7050557 | 1010796 | --- | --- | --- | 1,47 | up   |
| 6630278 | 7112268 | 1157751 | --- | --- | --- | 1,14 | up   |
| 6630313 | 7136977 | 1218856 | --- | --- | --- | 1,00 | up   |
| 6630314 | 7119930 | 1177216 | --- | --- | --- | 1,18 | up   |
| 6630335 | 7109373 | 1150977 | --- | --- | --- | 1,24 | up   |
| 6630360 | 7322388 | 1677326 | --- | --- | --- | 1,33 | up   |
| 6630397 | 7253408 | 1505946 | --- | --- | --- | 1,13 | down |
| 6630489 | 7078666 | 1076522 | --- | --- | --- | 1,10 | up   |
| 6630575 | 7031576 | 964110  | --- | --- | --- | 1,21 | down |
| 6630629 | 7088625 | 1099877 | --- | --- | --- | 1,29 | up   |
| 6630687 | 7149817 | 1250309 | --- | --- | --- | 1,13 | down |
| 6630701 | 7315206 | 1660018 | --- | --- | --- | 1,04 | up   |
| 6630817 | 7083030 | 1086246 | --- | --- | --- | 1,01 | up   |
| 6630833 | 7238115 | 1468635 | --- | --- | --- | 1,11 | up   |
| 6630905 | 7240232 | 1474408 | --- | --- | --- | 1,90 | down |
| 6630915 | 7231203 | 1450394 | --- | --- | --- | 1,01 | down |
| 6631054 | 7340838 | 1722085 | --- | --- | --- | 1,11 | down |
| 6631280 | 7368002 | 1789317 | --- | --- | --- | 1,08 | up   |
| 6631447 | 7338807 | 1716788 | --- | --- | --- | 2,26 | up   |
| 6631454 | 7038316 | 981455  | --- | --- | --- | 2,79 | up   |
| 6631509 | 7331719 | 1699920 | --- | --- | --- | 1,01 | down |
| 6631529 | 7363674 | 1778433 | --- | --- | --- | 1,13 | up   |
| 6631545 | 7263152 | 1530385 | --- | --- | --- | 1,15 | down |
| 6631589 | 7231203 | 1450439 | --- | --- | --- | 1,69 | down |
| 6631656 | 7063873 | 1040651 | --- | --- | --- | 1,87 | down |
| 6631819 | 7036412 | 976867  | --- | --- | --- | 1,12 | up   |
| 6631847 | 7073950 | 1065926 | --- | --- | --- | 1,05 | down |
| 6631848 | 7058713 | 1028665 | --- | --- | --- | 1,51 | up   |
| 6631892 | 7281923 | 1577692 | --- | --- | --- | 1,04 | up   |
| 6631972 | 7332059 | 1700724 | --- | --- | --- | 1,01 | up   |
| 6631986 | 7253408 | 1505950 | --- | --- | --- | 1,10 | up   |
| 6632015 | 7068073 | 1051176 | --- | --- | --- | 2,48 | up   |
| 6632040 | 7259923 | 1522528 | --- | --- | --- | 1,00 | down |
| 6632088 | 7376820 | 1813411 | --- | --- | --- | 1,60 | down |
| 6632114 | 7293234 | 1604359 | --- | --- | --- | 1,06 | down |
| 6632228 | 7161841 | 1279878 | --- | --- | --- | 1,31 | down |
| 6632232 | 7330078 | 1695461 | --- | --- | --- | 1,98 | up   |
| 6632349 | 7319144 | 1670085 | --- | --- | --- | 1,15 | up   |
| 6632355 | 7065265 | 1044568 | --- | --- | --- | 1,17 | up   |
| 6632369 | 7200545 | 1376931 | --- | --- | --- | 1,26 | up   |
| 6632381 | 7165954 | 1288769 | --- | --- | --- | 2,51 | down |
| 6632614 | 7043535 | 994104  | --- | --- | --- | 1,14 | up   |
| 6632618 | 7181442 | 1328885 | --- | --- | --- | 2,68 | down |
| 6632716 | 7255120 | 1510370 | --- | --- | --- | 1,27 | up   |
| 6632764 | 7025652 | 950325  | --- | --- | --- | 1,37 | up   |
| 6632900 | 7025652 | 950289  | --- | --- | --- | 1,00 | up   |
| 6633090 | 7105814 | 1141784 | --- | --- | --- | 1,20 | up   |
| 6633224 | 7121866 | 1181882 | --- | --- | --- | 1,39 | up   |
| 6633247 | 7289382 | 1595199 | --- | --- | --- | 1,21 | up   |
| 6633251 | 7254053 | 1507648 | --- | --- | --- | 1,05 | down |
| 6633303 | 7087282 | 1096217 | --- | --- | --- | 1,09 | up   |
| 6633342 | 7330078 | 1695470 | --- | --- | --- | 1,03 | up   |

|         |         |         |     |     |     |      |      |
|---------|---------|---------|-----|-----|-----|------|------|
| 6633428 | 7245921 | 1487711 | --- | --- | --- | 1,06 | down |
| 6633724 | 7363674 | 1778420 | --- | --- | --- | 1,18 | up   |
| 6633799 | 7277783 | 1567438 | --- | --- | --- | 2,31 | down |
| 6633810 | 7249503 | 1496210 | --- | --- | --- | 1,03 | down |
| 6633852 | 7060851 | 1033388 | --- | --- | --- | 1,09 | up   |
| 6634096 | 7380497 | 1821822 | --- | --- | --- | 1,66 | down |
| 6634151 | 7211343 | 1401971 | --- | --- | --- | 2,11 | down |
| 6634258 | 7342959 | 1727343 | --- | --- | --- | 1,33 | up   |
| 6634278 | 7189689 | 1349048 | --- | --- | --- | 2,04 | down |
| 6634313 | 7323545 | 1679960 | --- | --- | --- | 1,12 | up   |
| 6634331 | 7271213 | 1550651 | --- | --- | --- | 1,27 | up   |
| 6634335 | 7236395 | 1464315 | --- | --- | --- | 1,31 | up   |
| 6634366 | 7213945 | 1407833 | --- | --- | --- | 1,26 | down |
| 6634378 | 7361223 | 1772619 | --- | --- | --- | 1,13 | up   |
| 6634381 | 7113483 | 1161000 | --- | --- | --- | 1,18 | up   |
| 6634446 | 7060851 | 1033403 | --- | --- | --- | 1,03 | down |
| 6634508 | 7189689 | 1349054 | --- | --- | --- | 1,31 | down |
| 6634822 | 7189689 | 1349046 | --- | --- | --- | 1,29 | up   |
| 6634872 | 7192320 | 1356020 | --- | --- | --- | 1,15 | up   |
| 6635025 | 7179785 | 1324499 | --- | --- | --- | 1,37 | down |
| 6635028 | 7039223 | 983570  | --- | --- | --- | 2,35 | down |
| 6635043 | 7316644 | 1664035 | --- | --- | --- | 1,06 | up   |
| 6635225 | 7088625 | 1099877 | --- | --- | --- | 1,41 | up   |
| 6635329 | 7192320 | 1356020 | --- | --- | --- | 1,43 | down |
| 6635430 | 7271213 | 1550647 | --- | --- | --- | 1,32 | down |
| 6635473 | 7096859 | 1119322 | --- | --- | --- | 1,11 | down |
| 6635495 | 7181193 | 1328303 | --- | --- | --- | 1,12 | up   |
| 6635547 | 7217143 | 1415596 | --- | --- | --- | 1,02 | down |
| 6635554 | 7286807 | 1588800 | --- | --- | --- | 1,36 | up   |
| 6635665 | 7174281 | 1310846 | --- | --- | --- | 1,26 | down |
| 6635704 | 7213679 | 1407143 | --- | --- | --- | 1,34 | down |
| 6635723 | 7189184 | 1347569 | --- | --- | --- | 1,17 | down |
| 6635815 | 7301890 | 1626689 | --- | --- | --- | 1,10 | down |
| 6635940 | 7226241 | 1437774 | --- | --- | --- | 1,02 | up   |
| 6635981 | 7112225 | 1157558 | --- | --- | --- | 1,13 | down |
| 6636003 | 7059449 | 1030297 | --- | --- | --- | 1,68 | down |
| 6636038 | 7188138 | 1345067 | --- | --- | --- | 1,82 | down |
| 6636087 | 7302786 | 1628860 | --- | --- | --- | 1,14 | down |
| 6636104 | 7234040 | 1458493 | --- | --- | --- | 2,04 | up   |
| 6636264 | 7080106 | 1079738 | --- | --- | --- | 1,04 | up   |
| 6636317 | 7313411 | 1655444 | --- | --- | --- | 1,04 | down |
| 6636346 | 7108551 | 1148690 | --- | --- | --- | 1,16 | down |
| 6636349 | 7099573 | 1126734 | --- | --- | --- | 1,43 | up   |
| 6636492 | 7378997 | 1818667 | --- | --- | --- | 1,43 | up   |
| 6636579 | 7380497 | 1821833 | --- | --- | --- | 1,17 | down |
| 6636868 | 7247229 | 1490541 | --- | --- | --- | 1,04 | down |
| 6636869 | 7297589 | 1615658 | --- | --- | --- | 1,00 | up   |
| 6636953 | 7239939 | 1473795 | --- | --- | --- | 1,35 | up   |
| 6637151 | 7115708 | 1166476 | --- | --- | --- | 1,34 | up   |
| 6637385 | 7243603 | 1482270 | --- | --- | --- | 1,05 | down |
| 6637617 | 7339379 | 1718361 | --- | --- | --- | 2,09 | down |
| 6637638 | 7139708 | 1225055 | --- | --- | --- | 1,12 | up   |
| 6637639 | 7274892 | 1559573 | --- | --- | --- | 1,27 | down |
| 6637663 | 7297589 | 1615684 | --- | --- | --- | 1,01 | up   |
| 6637852 | 7339379 | 1718324 | --- | --- | --- | 1,04 | up   |
| 6637891 | 7181169 | 1328091 | --- | --- | --- | 1,02 | up   |

|         |         |         |     |     |     |      |      |
|---------|---------|---------|-----|-----|-----|------|------|
| 6637914 | 7153571 | 1259033 | --- | --- | --- | 1,25 | up   |
| 6637969 | 7299512 | 1620548 | --- | --- | --- | 1,09 | down |
| 6638047 | 7067556 | 1050037 | --- | --- | --- | 1,27 | up   |
| 6638052 | 7338807 | 1716807 | --- | --- | --- | 1,06 | down |
| 6638126 | 7050930 | 1011609 | --- | --- | --- | 1,15 | up   |
| 6638137 | 7203872 | 1384773 | --- | --- | --- | 1,02 | down |
| 6638279 | 7356333 | 1760489 | --- | --- | --- | 1,06 | down |
| 6638288 | 7350993 | 1747532 | --- | --- | --- | 1,50 | down |
| 6638333 | 7213945 | 1407838 | --- | --- | --- | 1,73 | down |
| 6638437 | 7261019 | 1525253 | --- | --- | --- | 2,46 | down |
| 6638468 | 7236395 | 1464340 | --- | --- | --- | 1,03 | down |
| 6638496 | 7070616 | 1057797 | --- | --- | --- | 1,15 | up   |
| 6638513 | 7181442 | 1328882 | --- | --- | --- | 1,05 | up   |
| 6638628 | 7213908 | 1407691 | --- | --- | --- | 1,10 | down |
| 6638685 | 7344702 | 1732140 | --- | --- | --- | 1,33 | down |
| 6638763 | 7111361 | 1155580 | --- | --- | --- | 2,12 | up   |
| 6638774 | 7139026 | 1223501 | --- | --- | --- | 1,10 | down |
| 6638831 | 7358859 | 1766981 | --- | --- | --- | 1,34 | down |
| 6638834 | 7190534 | 1351240 | --- | --- | --- | 1,58 | down |
| 6638900 | 7343868 | 1729856 | --- | --- | --- | 1,03 | up   |
| 6638936 | 7341397 | 1723623 | --- | --- | --- | 1,14 | down |
| 6639021 | 7147809 | 1245458 | --- | --- | --- | 1,43 | up   |
| 6639080 | 7141421 | 1229478 | --- | --- | --- | 1,08 | down |
| 6639103 | 7239752 | 1473162 | --- | --- | --- | 1,90 | down |
| 6639155 | 7058713 | 1028659 | --- | --- | --- | 1,32 | down |
| 6639179 | 7182713 | 1332539 | --- | --- | --- | 1,07 | down |
| 6639485 | 7189689 | 1349049 | --- | --- | --- | 1,01 | up   |
| 6639540 | 7320337 | 1673315 | --- | --- | --- | 1,18 | down |
| 6639553 | 7096859 | 1119300 | --- | --- | --- | 1,24 | up   |
| 6639647 | 7034293 | 971915  | --- | --- | --- | 1,25 | up   |
| 6639674 | 7075424 | 1069287 | --- | --- | --- | 1,14 | down |
| 6639709 | 7092549 | 1109147 | --- | --- | --- | 1,53 | up   |
| 6639811 | 7132487 | 1207322 | --- | --- | --- | 1,70 | up   |
| 6640000 | 7025652 | 950258  | --- | --- | --- | 1,02 | up   |
| 6640033 | 7092406 | 1108784 | --- | --- | --- | 1,41 | down |
| 6640046 | 7193056 | 1358277 | --- | --- | --- | 1,16 | up   |
| 6640060 | 7069253 | 1054161 | --- | --- | --- | 1,23 | down |
| 6640070 | 7089381 | 1102066 | --- | --- | --- | 2,00 | down |
| 6640150 | 7356027 | 1759985 | --- | --- | --- | 1,90 | up   |
| 6640159 | 7132024 | 1206339 | --- | --- | --- | 1,09 | up   |
| 6640166 | 7237438 | 1466795 | --- | --- | --- | 1,03 | up   |
| 6640237 | 7311218 | 1650348 | --- | --- | --- | 1,19 | up   |
| 6640340 | 7065265 | 1044574 | --- | --- | --- | 1,01 | down |
| 6640369 | 7034603 | 972862  | --- | --- | --- | 1,18 | down |
| 6640401 | 7279586 | 1572075 | --- | --- | --- | 1,20 | up   |
| 6640475 | 7310158 | 1647841 | --- | --- | --- | 1,11 | up   |
| 6640493 | 7188681 | 1346297 | --- | --- | --- | 1,12 | up   |
| 6640560 | 7333462 | 1703648 | --- | --- | --- | 1,12 | down |
| 6640603 | 7238202 | 1468944 | --- | --- | --- | 1,23 | up   |
| 6640626 | 7098411 | 1123700 | --- | --- | --- | 1,05 | up   |
| 6640643 | 7357103 | 1762386 | --- | --- | --- | 2,32 | up   |
| 6640985 | 7190844 | 1352141 | --- | --- | --- | 1,05 | down |
| 6641077 | 7041609 | 989550  | --- | --- | --- | 2,11 | up   |
| 6641123 | 7350993 | 1747541 | --- | --- | --- | 1,04 | down |
| 6641153 | 7139026 | 1223492 | --- | --- | --- | 1,11 | down |
| 6641165 | 7033504 | 969864  | --- | --- | --- | 1,65 | up   |

|         |         |         |     |     |     |      |      |
|---------|---------|---------|-----|-----|-----|------|------|
| 6641207 | 7319937 | 1672251 | --- | --- | --- | 1,00 | up   |
| 6641240 | 7253408 | 1505937 | --- | --- | --- | 1,09 | up   |
| 6641259 | 7029386 | 959410  | --- | --- | --- | 1,22 | down |
| 6641291 | 7088489 | 1099517 | --- | --- | --- | 1,33 | up   |
| 6641352 | 7056304 | 1023628 | --- | --- | --- | 1,20 | down |
| 6641408 | 7236395 | 1464321 | --- | --- | --- | 1,22 | up   |
| 6641565 | 7239752 | 1473188 | --- | --- | --- | 1,01 | up   |
| 6641585 | 7263152 | 1530365 | --- | --- | --- | 1,40 | down |
| 6641657 | 7280743 | 1574567 | --- | --- | --- | 1,21 | up   |
| 6641674 | 7266532 | 1538309 | --- | --- | --- | 1,15 | up   |
| 6641722 | 7189689 | 1349032 | --- | --- | --- | 1,72 | up   |
| 6641784 | 7132125 | 1206615 | --- | --- | --- | 1,11 | down |
| 6641847 | 7069239 | 1054081 | --- | --- | --- | 2,17 | down |
| 6641861 | 7380452 | 1821701 | --- | --- | --- | 1,27 | down |
| 6641907 | 7338807 | 1716780 | --- | --- | --- | 1,75 | up   |
| 6641946 | 7356027 | 1759985 | --- | --- | --- | 1,06 | up   |
| 6641983 | 7060851 | 1033424 | --- | --- | --- | 1,21 | down |
| 6642031 | 7146093 | 1240913 | --- | --- | --- | 1,03 | up   |
| 6642060 | 7092965 | 1110205 | --- | --- | --- | 1,37 | down |
| 6642159 | 7339379 | 1718341 | --- | --- | --- | 1,37 | up   |
| 6642184 | 7281923 | 1577695 | --- | --- | --- | 1,48 | up   |
| 6642202 | 7319937 | 1672305 | --- | --- | --- | 1,99 | up   |
| 6642450 | 7075533 | 1069573 | --- | --- | --- | 1,08 | up   |
| 6642630 | 7373732 | 1805973 | --- | --- | --- | 1,09 | down |
| 6642909 | 7356027 | 1759985 | --- | --- | --- | 1,05 | up   |
| 6642912 | 7244378 | 1484406 | --- | --- | --- | 1,31 | up   |
| 6643018 | 7315206 | 1660034 | --- | --- | --- | 1,27 | up   |
| 6643033 | 7140113 | 1226054 | --- | --- | --- | 1,17 | down |
| 6643072 | 7072765 | 1062738 | --- | --- | --- | 1,53 | up   |
| 6643074 | 7243647 | 1482457 | --- | --- | --- | 1,21 | down |
| 6643165 | 7244288 | 1484094 | --- | --- | --- | 1,92 | down |
| 6643212 | 7279568 | 1572025 | --- | --- | --- | 1,04 | up   |
| 6643236 | 7380497 | 1821853 | --- | --- | --- | 1,81 | down |
| 6643250 | 7184981 | 1337855 | --- | --- | --- | 1,10 | down |
| 6643364 | 7265989 | 1537091 | --- | --- | --- | 1,49 | down |
| 6643372 | 7340990 | 1722509 | --- | --- | --- | 1,06 | up   |
| 6643387 | 7236358 | 1464222 | --- | --- | --- | 1,14 | up   |
| 6643428 | 7191594 | 1354232 | --- | --- | --- | 1,61 | up   |
| 6643487 | 7314270 | 1657754 | --- | --- | --- | 2,17 | up   |
| 6643546 | 7273744 | 1557005 | --- | --- | --- | 2,14 | up   |
| 6643610 | 7293757 | 1605684 | --- | --- | --- | 1,31 | up   |
| 6643623 | 7111244 | 1155384 | --- | --- | --- | 1,05 | down |
| 6643644 | 7095262 | 1115635 | --- | --- | --- | 1,06 | down |
| 6643697 | 7350237 | 1745476 | --- | --- | --- | 1,21 | down |
| 6643712 | 7376566 | 1812885 | --- | --- | --- | 1,57 | down |
| 6643768 | 7154616 | 1262188 | --- | --- | --- | 1,22 | up   |
| 6643776 | 7188909 | 1346807 | --- | --- | --- | 1,01 | up   |
| 6643803 | 7061367 | 1034826 | --- | --- | --- | 1,09 | up   |
| 6643832 | 7178972 | 1322332 | --- | --- | --- | 1,01 | up   |
| 6643857 | 7358048 | 1764800 | --- | --- | --- | 1,03 | up   |
| 6643906 | 7148271 | 1246649 | --- | --- | --- | 1,25 | down |
| 6644173 | 7112225 | 1157622 | --- | --- | --- | 1,16 | down |
| 6644373 | 7240665 | 1475841 | --- | --- | --- | 1,58 | up   |
| 6644381 | 7345851 | 1734746 | --- | --- | --- | 1,30 | up   |
| 6644534 | 7235426 | 1461849 | --- | --- | --- | 2,48 | up   |
| 6644579 | 7243647 | 1482441 | --- | --- | --- | 1,03 | down |

|         |         |         |     |     |     |      |      |
|---------|---------|---------|-----|-----|-----|------|------|
| 6644609 | 7146982 | 1243289 | --- | --- | --- | 1,36 | down |
| 6644644 | 7169732 | 1298758 | --- | --- | --- | 1,10 | down |
| 6644687 | 7112225 | 1157526 | --- | --- | --- | 1,08 | up   |
| 6644833 | 7101258 | 1130566 | --- | --- | --- | 1,38 | down |
| 6645113 | 7319937 | 1672268 | --- | --- | --- | 1,21 | down |
| 6645134 | 7154655 | 1262332 | --- | --- | --- | 1,48 | up   |
| 6645155 | 7303616 | 1631326 | --- | --- | --- | 1,08 | up   |
| 6645171 | 7084993 | 1090667 | --- | --- | --- | 1,35 | up   |
| 6645175 | 7064134 | 1041414 | --- | --- | --- | 1,40 | down |
| 6645194 | 7042382 | 991288  | --- | --- | --- | 2,45 | up   |
| 6645209 | 7237438 | 1466794 | --- | --- | --- | 1,31 | down |
| 6645387 | 7059766 | 1030972 | --- | --- | --- | 1,67 | up   |
| 6645597 | 7295410 | 1609794 | --- | --- | --- | 1,02 | down |
| 6645651 | 7243603 | 1482259 | --- | --- | --- | 1,11 | down |
| 6645663 | 7331413 | 1699137 | --- | --- | --- | 1,06 | down |
| 6645712 | 7197820 | 1370097 | --- | --- | --- | 1,56 | down |
| 6645853 | 7093806 | 1112161 | --- | --- | --- | 2,08 | down |
| 6645878 | 7299512 | 1620550 | --- | --- | --- | 1,54 | down |
| 6645909 | 7247954 | 1492358 | --- | --- | --- | 1,14 | down |
| 6645927 | 7264808 | 1534469 | --- | --- | --- | 2,17 | down |
| 6645931 | 7174149 | 1310486 | --- | --- | --- | 2,01 | down |
| 6645996 | 7321029 | 1674817 | --- | --- | --- | 1,15 | down |
| 6646003 | 7176456 | 1315828 | --- | --- | --- | 1,03 | up   |
| 6646031 | 7172988 | 1307324 | --- | --- | --- | 1,14 | down |
| 6646087 | 7287337 | 1589971 | --- | --- | --- | 1,20 | up   |
| 6646106 | 7084999 | 1090710 | --- | --- | --- | 2,12 | up   |
| 6646117 | 7235521 | 1462162 | --- | --- | --- | 1,51 | up   |
| 6646204 | 7068259 | 1051641 | --- | --- | --- | 1,26 | up   |
| 6646224 | 7169732 | 1298781 | --- | --- | --- | 1,26 | up   |
| 6646273 | 7340838 | 1722065 | --- | --- | --- | 1,24 | up   |
| 6646278 | 7188685 | 1346304 | --- | --- | --- | 1,11 | down |
| 6646281 | 7181193 | 1328296 | --- | --- | --- | 1,07 | up   |
| 6646342 | 7212718 | 1404938 | --- | --- | --- | 1,11 | down |
| 6646447 | 7276231 | 1563110 | --- | --- | --- | 1,10 | down |
| 6646522 | 7087282 | 1096240 | --- | --- | --- | 1,10 | down |
| 6646566 | 7059716 | 1030833 | --- | --- | --- | 1,41 | down |
| 6646576 | 7041609 | 989577  | --- | --- | --- | 1,17 | down |
| 6646615 | 7028624 | 958004  | --- | --- | --- | 1,05 | up   |
| 6646660 | 7200996 | 1378159 | --- | --- | --- | 2,03 | up   |
| 6646668 | 7028624 | 957997  | --- | --- | --- | 1,08 | down |
| 6646716 | 7318143 | 1668091 | --- | --- | --- | 1,05 | down |
| 6646810 | 7065266 | 1044590 | --- | --- | --- | 1,17 | down |
| 6646812 | 7202550 | 1381614 | --- | --- | --- | 1,20 | down |
| 6646823 | 7373678 | 1805869 | --- | --- | --- | 2,64 | up   |
| 6646855 | 7370001 | 1795759 | --- | --- | --- | 1,04 | up   |
| 6646909 | 7038316 | 981462  | --- | --- | --- | 1,07 | down |
| 6646959 | 7349882 | 1744786 | --- | --- | --- | 1,12 | up   |
| 6647001 | 7149008 | 1248600 | --- | --- | --- | 1,49 | down |
| 6647035 | 7316644 | 1664001 | --- | --- | --- | 1,18 | up   |
| 6647042 | 7174149 | 1310506 | --- | --- | --- | 1,00 | up   |
| 6647113 | 7073854 | 1065628 | --- | --- | --- | 1,36 | up   |
| 6647267 | 7152889 | 1257332 | --- | --- | --- | 1,25 | up   |
| 6647276 | 7339387 | 1718397 | --- | --- | --- | 1,98 | down |
| 6647279 | 7320337 | 1673326 | --- | --- | --- | 1,00 | up   |
| 6647312 | 7355804 | 1759435 | --- | --- | --- | 1,30 | up   |
| 6647438 | 7371643 | 1800647 | --- | --- | --- | 1,19 | up   |

|         |         |         |     |     |     |      |      |
|---------|---------|---------|-----|-----|-----|------|------|
| 6647497 | 7301616 | 1625899 | --- | --- | --- | 1,16 | up   |
| 6647589 | 7356115 | 1760121 | --- | --- | --- | 1,09 | up   |
| 6647640 | 7112225 | 1157603 | --- | --- | --- | 1,21 | down |
| 6647692 | 7119930 | 1177215 | --- | --- | --- | 1,35 | up   |
| 6647777 | 7131103 | 1204356 | --- | --- | --- | 1,09 | up   |
| 6647800 | 7340757 | 1721894 | --- | --- | --- | 1,05 | up   |
| 6647932 | 7198210 | 1370986 | --- | --- | --- | 1,24 | up   |
| 6647976 | 7030233 | 961170  | --- | --- | --- | 1,01 | up   |
| 6648054 | 7312566 | 1653322 | --- | --- | --- | 1,91 | down |
| 6648130 | 7338807 | 1716808 | --- | --- | --- | 1,19 | up   |
| 6648172 | 7119556 | 1176076 | --- | --- | --- | 1,02 | down |
| 6648263 | 7316589 | 1663876 | --- | --- | --- | 2,19 | down |
| 6648269 | 7059020 | 1029355 | --- | --- | --- | 1,09 | up   |
| 6648335 | 7233440 | 1456919 | --- | --- | --- | 1,02 | up   |
| 6648369 | 7266706 | 1538753 | --- | --- | --- | 1,19 | up   |
| 6648437 | 7075445 | 1069350 | --- | --- | --- | 1,05 | up   |
| 6648494 | 7364995 | 1781303 | --- | --- | --- | 1,18 | up   |
| 6648518 | 7142081 | 1230969 | --- | --- | --- | 1,24 | down |
| 6648531 | 7328920 | 1693018 | --- | --- | --- | 1,22 | down |
| 6648603 | 7233440 | 1456885 | --- | --- | --- | 1,81 | down |
| 6648655 | 7315206 | 1660016 | --- | --- | --- | 1,62 | down |
| 6648768 | 7238115 | 1468585 | --- | --- | --- | 1,10 | up   |
| 6648831 | 7148978 | 1248478 | --- | --- | --- | 1,37 | down |
| 6648845 | 7034293 | 971947  | --- | --- | --- | 1,90 | up   |
| 6648884 | 7150497 | 1251792 | --- | --- | --- | 1,16 | up   |
| 6648905 | 7072225 | 1061405 | --- | --- | --- | 2,06 | down |
| 6648920 | 7109373 | 1150982 | --- | --- | --- | 1,06 | up   |
| 6649115 | 7274931 | 1559717 | --- | --- | --- | 1,16 | up   |
| 6649117 | 7039463 | 984254  | --- | --- | --- | 2,25 | down |
| 6649135 | 7233923 | 1458163 | --- | --- | --- | 1,13 | up   |
| 6649158 | 7142416 | 1231785 | --- | --- | --- | 1,20 | up   |
| 6649171 | 7033337 | 969488  | --- | --- | --- | 1,09 | up   |
| 6649223 | 7062173 | 1036985 | --- | --- | --- | 1,03 | down |
| 6649321 | 7061367 | 1034837 | --- | --- | --- | 1,20 | up   |
| 6649354 | 7293646 | 1605410 | --- | --- | --- | 1,22 | up   |
| 6649519 | 7313905 | 1656848 | --- | --- | --- | 4,25 | down |
| 6649719 | 7217679 | 1417321 | --- | --- | --- | 1,02 | up   |
| 6649721 | 7170845 | 1301860 | --- | --- | --- | 1,10 | up   |
| 6649727 | 7374842 | 1808971 | --- | --- | --- | 1,06 | up   |
| 6649740 | 7087282 | 1096160 | --- | --- | --- | 1,56 | up   |
| 6649919 | 7024628 | 947422  | --- | --- | --- | 1,73 | down |
| 6650323 | 7068259 | 1051593 | --- | --- | --- | 1,52 | up   |
| 6650384 | 7034293 | 971996  | --- | --- | --- | 1,33 | down |
| 6650443 | 7316644 | 1664008 | --- | --- | --- | 1,19 | down |
| 6650449 | 7365183 | 1781920 | --- | --- | --- | 1,07 | up   |
| 6650470 | 7196803 | 1367339 | --- | --- | --- | 1,07 | down |
| 6650518 | 7247229 | 1490536 | --- | --- | --- | 1,14 | down |
| 6650699 | 7243130 | 1480929 | --- | --- | --- | 1,18 | up   |
| 6650716 | 7038530 | 981881  | --- | --- | --- | 1,03 | up   |
| 6650765 | 7147809 | 1245462 | --- | --- | --- | 1,13 | up   |
| 6650838 | 7113483 | 1161017 | --- | --- | --- | 1,06 | up   |
| 6650868 | 7331297 | 1698825 | --- | --- | --- | 1,16 | down |
| 6650941 | 7243130 | 1480876 | --- | --- | --- | 1,03 | down |
| 6650945 | 7274780 | 1559227 | --- | --- | --- | 1,06 | down |
| 6651005 | 7060851 | 1033425 | --- | --- | --- | 1,15 | down |
| 6651335 | 7303616 | 1631338 | --- | --- | --- | 1,09 | up   |

|         |         |         |     |     |     |      |      |
|---------|---------|---------|-----|-----|-----|------|------|
| 6651354 | 7243603 | 1482262 | --- | --- | --- | 1,06 | down |
| 6651411 | 7374842 | 1808973 | --- | --- | --- | 1,39 | down |
| 6651457 | 7257963 | 1517683 | --- | --- | --- | 1,09 | down |
| 6651534 | 7142081 | 1230977 | --- | --- | --- | 1,08 | down |
| 6651584 | 7131550 | 1205553 | --- | --- | --- | 1,12 | up   |
| 6651589 | 7280743 | 1574570 | --- | --- | --- | 1,55 | down |
| 6651760 | 7303722 | 1631719 | --- | --- | --- | 1,14 | down |
| 6651773 | 7065265 | 1044567 | --- | --- | --- | 1,01 | down |
| 6651911 | 7299785 | 1621352 | --- | --- | --- | 1,07 | down |
| 6651914 | 7162177 | 1280582 | --- | --- | --- | 1,60 | up   |
| 6651975 | 7330238 | 1695927 | --- | --- | --- | 1,13 | down |
| 6652020 | 7213908 | 1407665 | --- | --- | --- | 1,31 | down |
| 6652091 | 7341253 | 1723252 | --- | --- | --- | 1,35 | down |
| 6652100 | 7095956 | 1117042 | --- | --- | --- | 1,54 | up   |
| 6652105 | 7230611 | 1448804 | --- | --- | --- | 1,82 | down |
| 6652447 | 7240569 | 1475464 | --- | --- | --- | 1,06 | up   |
| 6652448 | 7156052 | 1265761 | --- | --- | --- | 1,17 | up   |
| 6652499 | 7151063 | 1253063 | --- | --- | --- | 2,09 | up   |
| 6652548 | 7297589 | 1615654 | --- | --- | --- | 1,07 | down |
| 6652690 | 7188822 | 1346630 | --- | --- | --- | 1,28 | down |
| 6652717 | 7099573 | 1126706 | --- | --- | --- | 1,05 | down |
| 6652757 | 7040260 | 986054  | --- | --- | --- | 1,12 | down |
| 6652824 | 7096898 | 1119519 | --- | --- | --- | 1,29 | down |
| 6652932 | 7368729 | 1792054 | --- | --- | --- | 1,17 | down |
| 6652941 | 7065266 | 1044586 | --- | --- | --- | 1,36 | down |
| 6652999 | 7064468 | 1042371 | --- | --- | --- | 1,26 | up   |
| 6653118 | 7053874 | 1018323 | --- | --- | --- | 1,00 | down |
| 6653190 | 7043379 | 993653  | --- | --- | --- | 1,38 | up   |
| 6653193 | 7290793 | 1598637 | --- | --- | --- | 1,49 | up   |
| 6653221 | 7266532 | 1538304 | --- | --- | --- | 1,02 | down |
| 6653272 | 7290585 | 1598185 | --- | --- | --- | 1,01 | up   |
| 6653343 | 7240665 | 1475815 | --- | --- | --- | 1,04 | up   |
| 6653350 | 7038530 | 981888  | --- | --- | --- | 1,06 | up   |
| 6653393 | 7234195 | 1458978 | --- | --- | --- | 1,32 | up   |
| 6653402 | 7180620 | 1326390 | --- | --- | --- | 1,11 | up   |
| 6653440 | 7308679 | 1644242 | --- | --- | --- | 1,40 | up   |
| 6653469 | 7323545 | 1679935 | --- | --- | --- | 1,32 | up   |
| 6653470 | 7165954 | 1288770 | --- | --- | --- | 1,28 | up   |
| 6653637 | 7083030 | 1086262 | --- | --- | --- | 1,71 | down |
| 6653659 | 7248790 | 1494523 | --- | --- | --- | 1,55 | up   |
| 6653700 | 7247848 | 1492064 | --- | --- | --- | 1,34 | up   |
| 6653702 | 7331719 | 1699922 | --- | --- | --- | 1,22 | down |
| 6653788 | 7101258 | 1130572 | --- | --- | --- | 1,05 | down |
| 6653805 | 7374740 | 1808628 | --- | --- | --- | 1,23 | up   |
| 6654018 | 7364346 | 1779996 | --- | --- | --- | 1,72 | down |
| 6654115 | 7339379 | 1718323 | --- | --- | --- | 1,03 | down |
| 6654118 | 7333462 | 1703644 | --- | --- | --- | 1,12 | down |
| 6654195 | 7268457 | 1543637 | --- | --- | --- | 2,53 | down |
| 6654210 | 7330238 | 1695957 | --- | --- | --- | 1,24 | down |
| 6654219 | 7065265 | 1044574 | --- | --- | --- | 1,09 | up   |
| 6654254 | 7243603 | 1482285 | --- | --- | --- | 1,25 | down |
| 6654261 | 7067670 | 1050325 | --- | --- | --- | 1,58 | up   |
| 6654314 | 7233298 | 1456272 | --- | --- | --- | 1,16 | down |
| 6654394 | 7341002 | 1722534 | --- | --- | --- | 1,32 | up   |
| 6654460 | 7315571 | 1661010 | --- | --- | --- | 1,87 | up   |
| 6654535 | 7174149 | 1310503 | --- | --- | --- | 1,00 | up   |

|         |         |         |     |     |     |      |      |
|---------|---------|---------|-----|-----|-----|------|------|
| 6654638 | 7254088 | 1507737 | --- | --- | --- | 1,06 | up   |
| 6654645 | 7369712 | 1794855 | --- | --- | --- | 2,21 | up   |
| 6654706 | 7373038 | 1804279 | --- | --- | --- | 1,21 | down |
| 6654783 | 7279533 | 1571916 | --- | --- | --- | 1,25 | down |
| 6654911 | 7297589 | 1615680 | --- | --- | --- | 1,10 | down |
| 6654915 | 7050726 | 1011255 | --- | --- | --- | 1,14 | down |
| 6654923 | 7156114 | 1266045 | --- | --- | --- | 1,12 | up   |
| 6654940 | 7325416 | 1684600 | --- | --- | --- | 1,14 | down |
| 6655008 | 7248790 | 1494514 | --- | --- | --- | 1,32 | up   |
| 6655084 | 7369781 | 1795034 | --- | --- | --- | 1,26 | down |
| 6655371 | 7358048 | 1764821 | --- | --- | --- | 1,18 | up   |
| 6655393 | 7203872 | 1384758 | --- | --- | --- | 1,20 | up   |
| 6655483 | 7166497 | 1290356 | --- | --- | --- | 1,12 | down |
| 6655495 | 7092549 | 1109193 | --- | --- | --- | 1,25 | up   |
| 6655514 | 7236254 | 1464068 | --- | --- | --- | 1,14 | down |
| 6655536 | 7337845 | 1714352 | --- | --- | --- | 1,01 | down |
| 6655590 | 7233425 | 1456756 | --- | --- | --- | 1,12 | up   |
| 6655593 | 7249737 | 1496752 | --- | --- | --- | 1,84 | down |
| 6655648 | 7034756 | 973234  | --- | --- | --- | 1,60 | up   |
| 6655714 | 7209927 | 1398918 | --- | --- | --- | 1,13 | up   |
| 6655744 | 7311218 | 1650357 | --- | --- | --- | 1,09 | up   |
| 6655772 | 7039223 | 983576  | --- | --- | --- | 1,72 | down |
| 6655800 | 7240569 | 1475493 | --- | --- | --- | 1,34 | up   |
| 6655867 | 7254053 | 1507653 | --- | --- | --- | 1,09 | up   |
| 6655882 | 7031774 | 964767  | --- | --- | --- | 1,05 | down |
| 6655913 | 7177520 | 1318641 | --- | --- | --- | 1,21 | up   |
| 6655941 | 7331434 | 1699201 | --- | --- | --- | 1,04 | up   |
| 6656012 | 7221817 | 1427151 | --- | --- | --- | 3,79 | down |
| 6656128 | 7052385 | 1014779 | --- | --- | --- | 1,41 | down |
| 6656141 | 7196029 | 1365618 | --- | --- | --- | 1,14 | up   |
| 6656320 | 7361223 | 1772619 | --- | --- | --- | 1,02 | up   |
| 6656370 | 7350993 | 1747519 | --- | --- | --- | 1,08 | down |
| 6656562 | 7349882 | 1744785 | --- | --- | --- | 1,02 | down |
| 6656607 | 7155286 | 1263861 | --- | --- | --- | 1,04 | down |
| 6656722 | 7255120 | 1510375 | --- | --- | --- | 1,21 | up   |
| 6656738 | 7086966 | 1095269 | --- | --- | --- | 1,01 | up   |
| 6656747 | 7170764 | 1301426 | --- | --- | --- | 1,35 | down |
| 6656783 | 7037764 | 980092  | --- | --- | --- | 1,16 | down |
| 6656870 | 7249503 | 1496201 | --- | --- | --- | 1,65 | up   |
| 6656910 | 7097525 | 1121049 | --- | --- | --- | 1,30 | up   |
| 6656914 | 7336835 | 1711593 | --- | --- | --- | 1,07 | up   |
| 6656972 | 7274780 | 1559236 | --- | --- | --- | 1,93 | up   |
| 6657085 | 7303616 | 1631328 | --- | --- | --- | 1,16 | down |
| 6657159 | 7226241 | 1437800 | --- | --- | --- | 1,37 | down |
| 6657210 | 7084993 | 1090691 | --- | --- | --- | 1,06 | up   |
| 6657236 | 7056304 | 1023547 | --- | --- | --- | 1,06 | up   |
| 6657267 | 7080106 | 1079726 | --- | --- | --- | 1,21 | up   |
| 6657281 | 7337224 | 1712615 | --- | --- | --- | 1,10 | down |
| 6657285 | 7031576 | 964110  | --- | --- | --- | 1,30 | up   |
| 6657331 | 7098366 | 1123621 | --- | --- | --- | 1,06 | down |
| 6657390 | 7033504 | 969858  | --- | --- | --- | 1,08 | up   |
| 6657541 | 7075424 | 1069286 | --- | --- | --- | 1,01 | up   |
| 6657554 | 7311218 | 1650362 | --- | --- | --- | 1,11 | down |
| 6657611 | 7192914 | 1357831 | --- | --- | --- | 1,05 | down |
| 6657621 | 7265259 | 1535452 | --- | --- | --- | 1,04 | up   |
| 6657653 | 7265952 | 1536978 | --- | --- | --- | 1,69 | up   |



|         |         |         |     |     |     |      |      |
|---------|---------|---------|-----|-----|-----|------|------|
| 6657830 | 7184981 | 1337835 | --- | --- | --- | 1,10 | up   |
| 6657941 | 7231835 | 1452277 | --- | --- | --- | 1,10 | up   |
| 6657958 | 7373678 | 1805865 | --- | --- | --- | 1,65 | up   |
| 6658020 | 7037764 | 980056  | --- | --- | --- | 1,06 | down |
| 6658106 | 7087965 | 1098057 | --- | --- | --- | 1,07 | up   |
| 6658227 | 7122131 | 1182671 | --- | --- | --- | 1,04 | up   |
| 6658272 | 7112562 | 1158608 | --- | --- | --- | 1,58 | down |
| 6658291 | 7233012 | 1455408 | --- | --- | --- | 1,46 | down |
| 6658362 | 7083031 | 1086286 | --- | --- | --- | 1,02 | up   |
| 6658409 | 7099156 | 1125640 | --- | --- | --- | 1,03 | down |
| 6658416 | 7322260 | 1677067 | --- | --- | --- | 3,47 | down |
| 6658418 | 7112225 | 1157613 | --- | --- | --- | 1,00 | up   |
| 6658442 | 7116103 | 1167599 | --- | --- | --- | 7,34 | down |
| 6658489 | 7240569 | 1475464 | --- | --- | --- | 1,19 | up   |
| 6658613 | 7243653 | 1482536 | --- | --- | --- | 1,03 | down |
| 6658640 | 7235521 | 1462142 | --- | --- | --- | 1,36 | up   |
| 6658860 | 7093806 | 1112162 | --- | --- | --- | 3,68 | down |
| 6658932 | 7331413 | 1699137 | --- | --- | --- | 1,00 | up   |
| 6658979 | 7384365 | 1830270 | --- | --- | --- | 1,79 | up   |
| 6659050 | 7286807 | 1588826 | --- | --- | --- | 1,10 | down |
| 6659150 | 7235521 | 1462148 | --- | --- | --- | 1,15 | up   |
| 6659188 | 7308679 | 1644251 | --- | --- | --- | 1,18 | up   |
| 6659402 | 7236358 | 1464260 | --- | --- | --- | 1,04 | up   |
| 6659474 | 7078198 | 1075601 | --- | --- | --- | 1,16 | down |
| 6659558 | 7340057 | 1720334 | --- | --- | --- | 1,13 | down |
| 6659771 | 7091954 | 1107727 | --- | --- | --- | 1,14 | down |
| 6659994 | 7071969 | 1060899 | --- | --- | --- | 1,21 | up   |
| 6659996 | 7323545 | 1679953 | --- | --- | --- | 2,57 | down |
| 6660011 | 7368613 | 1791622 | --- | --- | --- | 1,11 | down |
| 6660132 | 7156372 | 1266710 | --- | --- | --- | 1,02 | down |
| 6660188 | 7363765 | 1778586 | --- | --- | --- | 1,03 | up   |
| 6660228 | 7256191 | 1512885 | --- | --- | --- | 1,06 | up   |
| 6660273 | 7112225 | 1157562 | --- | --- | --- | 1,12 | down |
| 6660292 | 7235069 | 1460985 | --- | --- | --- | 1,12 | up   |
| 6660302 | 7209927 | 1398947 | --- | --- | --- | 1,60 | up   |
| 6660404 | 7086966 | 1095270 | --- | --- | --- | 1,17 | up   |
| 6660408 | 7297154 | 1614260 | --- | --- | --- | 1,16 | down |
| 6660464 | 7038530 | 981869  | --- | --- | --- | 1,11 | down |
| 6660702 | 7303616 | 1631308 | --- | --- | --- | 1,29 | down |
| 6660765 | 7064224 | 1041805 | --- | --- | --- | 1,04 | down |
| 6660838 | 7337224 | 1712616 | --- | --- | --- | 1,05 | up   |
| 6660893 | 7345465 | 1733850 | --- | --- | --- | 1,47 | down |
| 6661165 | 7349643 | 1744192 | --- | --- | --- | 1,05 | down |
| 6661168 | 7267802 | 1541743 | --- | --- | --- | 1,57 | up   |
| 6661194 | 7343122 | 1727736 | --- | --- | --- | 1,45 | up   |
| 6661231 | 7131764 | 1205858 | --- | --- | --- | 1,48 | down |
| 6661266 | 7276650 | 1564111 | --- | --- | --- | 1,02 | up   |
| 6661372 | 7214605 | 1409364 | --- | --- | --- | 1,12 | up   |
| 6661379 | 7166497 | 1290371 | --- | --- | --- | 1,22 | up   |
| 6661447 | 7229886 | 1447171 | --- | --- | --- | 1,04 | down |
| 6661484 | 7115146 | 1164936 | --- | --- | --- | 1,09 | up   |
| 6661487 | 7156052 | 1265775 | --- | --- | --- | 1,04 | down |
| 6661495 | 7238845 | 1470567 | --- | --- | --- | 1,64 | up   |
| 6661629 | 7084993 | 1090667 | --- | --- | --- | 1,25 | up   |
| 6662091 | 7303616 | 1631373 | --- | --- | --- | 1,10 | down |
| 6662185 | 7234008 | 1458368 | --- | --- | --- | 1,34 | down |

|         |         |         |     |     |     |      |      |
|---------|---------|---------|-----|-----|-----|------|------|
| 6662316 | 7351953 | 1749880 | --- | --- | --- | 2,68 | down |
| 6662350 | 7067670 | 1050323 | --- | --- | --- | 1,78 | up   |
| 6662455 | 7345465 | 1733858 | --- | --- | --- | 1,29 | up   |
| 6662496 | 7112566 | 1158625 | --- | --- | --- | 1,23 | up   |
| 6662540 | 7228520 | 1443769 | --- | --- | --- | 1,39 | down |
| 6662666 | 7171034 | 1302286 | --- | --- | --- | 1,09 | down |
| 6662818 | 7341253 | 1723311 | --- | --- | --- | 1,17 | down |
| 6662864 | 7264274 | 1533174 | --- | --- | --- | 1,09 | down |
| 6662878 | 7249503 | 1496179 | --- | --- | --- | 1,10 | down |
| 6662916 | 7043452 | 993835  | --- | --- | --- | 1,79 | up   |
| 6662969 | 7350237 | 1745496 | --- | --- | --- | 1,43 | up   |
| 6662971 | 7258670 | 1519336 | --- | --- | --- | 1,17 | down |
| 6663004 | 7142853 | 1232905 | --- | --- | --- | 1,08 | up   |
| 6663037 | 7038610 | 982075  | --- | --- | --- | 1,88 | down |
| 6663099 | 7357890 | 1764385 | --- | --- | --- | 1,55 | down |
| 6663347 | 7203872 | 1384766 | --- | --- | --- | 1,13 | down |
| 6663402 | 7189689 | 1349039 | --- | --- | --- | 1,06 | up   |
| 6663432 | 7123357 | 1185595 | --- | --- | --- | 1,01 | down |
| 6663502 | 7247848 | 1492069 | --- | --- | --- | 1,01 | down |
| 6663597 | 7067556 | 1050034 | --- | --- | --- | 1,01 | up   |
| 6663750 | 7356333 | 1760482 | --- | --- | --- | 1,22 | up   |
| 6663783 | 7261592 | 1526857 | --- | --- | --- | 1,47 | up   |
| 6663792 | 7240569 | 1475312 | --- | --- | --- | 1,36 | up   |
| 6664038 | 7252382 | 1503507 | --- | --- | --- | 1,68 | up   |
| 6664410 | 7068942 | 1053389 | --- | --- | --- | 1,02 | down |
| 6664527 | 7180620 | 1326382 | --- | --- | --- | 1,47 | down |
| 6664601 | 7321204 | 1675179 | --- | --- | --- | 1,13 | up   |
| 6664855 | 7253408 | 1505955 | --- | --- | --- | 1,09 | down |
| 6664886 | 7049399 | 1008331 | --- | --- | --- | 1,32 | down |
| 6665013 | 7207069 | 1392030 | --- | --- | --- | 1,08 | up   |
| 6665193 | 7092965 | 1110160 | --- | --- | --- | 1,01 | down |
| 6665199 | 7104977 | 1140170 | --- | --- | --- | 1,23 | down |
| 6665298 | 7197056 | 1367841 | --- | --- | --- | 1,06 | up   |
| 6665357 | 7274780 | 1559199 | --- | --- | --- | 1,27 | up   |
| 6665471 | 7240206 | 1474349 | --- | --- | --- | 1,12 | down |
| 6665573 | 7266706 | 1538743 | --- | --- | --- | 1,58 | down |
| 6665594 | 7344406 | 1731203 | --- | --- | --- | 1,06 | up   |
| 6665671 | 7384509 | 1830732 | --- | --- | --- | 1,81 | up   |
| 6665715 | 7331413 | 1699139 | --- | --- | --- | 1,02 | up   |
| 6665768 | 7243647 | 1482449 | --- | --- | --- | 1,06 | up   |
| 6665776 | 7064468 | 1042376 | --- | --- | --- | 1,06 | down |
| 6665848 | 7357103 | 1762388 | --- | --- | --- | 1,39 | up   |
| 6665886 | 7028624 | 958005  | --- | --- | --- | 1,38 | down |
| 6665899 | 7274585 | 1558790 | --- | --- | --- | 1,37 | down |
| 6665924 | 7132020 | 1206309 | --- | --- | --- | 1,01 | down |
| 6666088 | 7034293 | 971905  | --- | --- | --- | 1,15 | down |
| 6666120 | 7037764 | 980079  | --- | --- | --- | 1,07 | down |
| 6666162 | 7103811 | 1137063 | --- | --- | --- | 1,08 | up   |
| 6666279 | 7318143 | 1668094 | --- | --- | --- | 1,36 | down |
| 6666288 | 7218259 | 1418806 | --- | --- | --- | 1,63 | down |
| 6666308 | 7249737 | 1496753 | --- | --- | --- | 1,78 | down |
| 6666386 | 7047865 | 1005354 | --- | --- | --- | 1,24 | up   |
| 6666408 | 7032618 | 967305  | --- | --- | --- | 1,11 | up   |
| 6666417 | 7061550 | 1035303 | --- | --- | --- | 1,90 | down |
| 6666595 | 7330396 | 1696401 | --- | --- | --- | 1,15 | down |
| 6666619 | 7280743 | 1574489 | --- | --- | --- | 1,21 | down |

|         |         |         |     |     |     |      |      |
|---------|---------|---------|-----|-----|-----|------|------|
| 6666681 | 7078273 | 1075822 | --- | --- | --- | 1,13 | down |
| 6666750 | 7235521 | 1462149 | --- | --- | --- | 1,03 | down |
| 6666789 | 7031774 | 964730  | --- | --- | --- | 1,63 | up   |
| 6666805 | 7243130 | 1480871 | --- | --- | --- | 1,07 | up   |
| 6666826 | 7176456 | 1315830 | --- | --- | --- | 1,10 | up   |
| 6666960 | 7337224 | 1712620 | --- | --- | --- | 1,12 | down |
| 6666972 | 7112570 | 1158680 | --- | --- | --- | 1,17 | up   |
| 6667016 | 7267802 | 1541821 | --- | --- | --- | 1,00 | down |
| 6667022 | 7267234 | 1539996 | --- | --- | --- | 1,13 | down |
| 6667062 | 7062436 | 1037722 | --- | --- | --- | 1,82 | down |
| 6667131 | 7180732 | 1326730 | --- | --- | --- | 1,13 | up   |
| 6667655 | 7191983 | 1355175 | --- | --- | --- | 1,13 | up   |
| 6667663 | 7156061 | 1265829 | --- | --- | --- | 1,07 | up   |
| 6667718 | 7280743 | 1574551 | --- | --- | --- | 1,29 | up   |
| 6667898 | 7038669 | 982189  | --- | --- | --- | 1,75 | down |
| 6667913 | 7226241 | 1437790 | --- | --- | --- | 1,67 | down |
| 6667980 | 7248004 | 1492607 | --- | --- | --- | 1,65 | up   |
| 6668048 | 7248790 | 1494524 | --- | --- | --- | 1,18 | down |
| 6668067 | 7096859 | 1119306 | --- | --- | --- | 1,62 | down |
| 6668075 | 7041584 | 989460  | --- | --- | --- | 1,35 | down |
| 6668077 | 7186464 | 1341356 | --- | --- | --- | 1,19 | down |
| 6668116 | 7312903 | 1654107 | --- | --- | --- | 1,12 | down |
| 6668303 | 7240739 | 1476007 | --- | --- | --- | 1,07 | down |
| 6668367 | 7088135 | 1098384 | --- | --- | --- | 1,28 | down |
| 6668388 | 7040260 | 986068  | --- | --- | --- | 1,38 | up   |
| 6668589 | 7217650 | 1417171 | --- | --- | --- | 1,17 | up   |
| 6668660 | 7052933 | 1016213 | --- | --- | --- | 1,38 | down |
| 6668717 | 7092549 | 1109166 | --- | --- | --- | 1,24 | up   |
| 6668769 | 7147809 | 1245471 | --- | --- | --- | 2,08 | up   |
| 6668814 | 7293757 | 1605684 | --- | --- | --- | 1,59 | down |
| 6668971 | 7176177 | 1315138 | --- | --- | --- | 2,30 | down |
| 6668999 | 7319259 | 1670397 | --- | --- | --- | 1,02 | up   |
| 6669002 | 7297274 | 1614657 | --- | --- | --- | 1,05 | up   |
| 6669028 | 7321029 | 1674828 | --- | --- | --- | 1,14 | up   |
| 6669037 | 7177520 | 1318614 | --- | --- | --- | 1,00 | up   |
| 6669053 | 7238202 | 1468943 | --- | --- | --- | 1,23 | down |
| 6669100 | 7101400 | 1130894 | --- | --- | --- | 1,57 | up   |
| 6669138 | 7086664 | 1094277 | --- | --- | --- | 1,59 | up   |
| 6669336 | 7336449 | 1710618 | --- | --- | --- | 1,10 | down |
| 6669357 | 7350489 | 1746114 | --- | --- | --- | 1,06 | down |
| 6669460 | 7331297 | 1698805 | --- | --- | --- | 1,41 | down |
| 6669535 | 7294151 | 1606633 | --- | --- | --- | 1,15 | down |
| 6669569 | 7235521 | 1462158 | --- | --- | --- | 2,73 | up   |
| 6669591 | 7087965 | 1098048 | --- | --- | --- | 1,07 | down |
| 6669640 | 7141421 | 1229477 | --- | --- | --- | 1,41 | up   |
| 6669702 | 7303616 | 1631324 | --- | --- | --- | 1,08 | up   |
| 6669918 | 7280743 | 1574570 | --- | --- | --- | 1,06 | up   |
| 6669924 | 7082098 | 1084119 | --- | --- | --- | 1,10 | up   |
| 6669933 | 7356001 | 1759919 | --- | --- | --- | 1,29 | up   |
| 6670052 | 7112225 | 1157584 | --- | --- | --- | 1,02 | up   |
| 6670175 | 7188829 | 1346666 | --- | --- | --- | 1,18 | down |
| 6670270 | 7068942 | 1053392 | --- | --- | --- | 1,06 | up   |
| 6670449 | 7314270 | 1657749 | --- | --- | --- | 1,06 | down |
| 6670531 | 7039265 | 983658  | --- | --- | --- | 1,17 | up   |
| 6670566 | 7178060 | 1320172 | --- | --- | --- | 1,04 | up   |
| 6670577 | 7093936 | 1112473 | --- | --- | --- | 1,11 | down |

|         |         |         |     |     |     |      |      |
|---------|---------|---------|-----|-----|-----|------|------|
| 6670681 | 7369781 | 1795032 | --- | --- | --- | 1,54 | down |
| 6670733 | 7311218 | 1650364 | --- | --- | --- | 1,02 | down |
| 6670745 | 7236254 | 1464075 | --- | --- | --- | 1,03 | up   |
| 6670762 | 7039223 | 983551  | --- | --- | --- | 1,17 | up   |
| 6670882 | 7237719 | 1467506 | --- | --- | --- | 1,12 | down |
| 6670913 | 7084993 | 1090673 | --- | --- | --- | 1,13 | down |
| 6671052 | 7363568 | 1778133 | --- | --- | --- | 1,07 | up   |
| 6671063 | 7097680 | 1121735 | --- | --- | --- | 1,20 | down |
| 6671068 | 7347396 | 1738484 | --- | --- | --- | 1,13 | down |
| 6671082 | 7194172 | 1361160 | --- | --- | --- | 1,15 | down |
| 6671085 | 7337845 | 1714333 | --- | --- | --- | 1,22 | down |
| 6671110 | 7343122 | 1727742 | --- | --- | --- | 1,20 | down |
| 6671193 | 7115880 | 1166830 | --- | --- | --- | 1,20 | up   |
| 6671233 | 7323545 | 1679928 | --- | --- | --- | 1,08 | up   |
| 6671308 | 7189574 | 1348702 | --- | --- | --- | 1,90 | down |
| 6671512 | 7279533 | 1571917 | --- | --- | --- | 1,33 | up   |
| 6671514 | 7363674 | 1778415 | --- | --- | --- | 1,31 | up   |
| 6671564 | 7243130 | 1480852 | --- | --- | --- | 1,46 | down |
| 6671569 | 7323545 | 1679922 | --- | --- | --- | 1,26 | down |
| 6671626 | 7133612 | 1210209 | --- | --- | --- | 1,14 | up   |
| 6671631 | 7039589 | 984513  | --- | --- | --- | 1,73 | up   |
| 6671843 | 7253408 | 1505936 | --- | --- | --- | 1,20 | down |
| 6671874 | 7255120 | 1510375 | --- | --- | --- | 1,21 | down |
| 6672053 | 7095262 | 1115649 | --- | --- | --- | 1,37 | up   |
| 6672156 | 7064134 | 1041432 | --- | --- | --- | 1,32 | up   |
| 6672217 | 7058713 | 1028678 | --- | --- | --- | 1,04 | up   |
| 6672390 | 7312566 | 1653303 | --- | --- | --- | 1,06 | down |
| 6672490 | 7243363 | 1481603 | --- | --- | --- | 1,51 | up   |
| 6672537 | 7277783 | 1567457 | --- | --- | --- | 1,50 | up   |
| 6672586 | 7368684 | 1791855 | --- | --- | --- | 1,21 | up   |
| 6672846 | 7363674 | 1778438 | --- | --- | --- | 1,79 | down |
| 6672981 | 7067828 | 1050769 | --- | --- | --- | 1,66 | down |
| 6673022 | 7038530 | 981862  | --- | --- | --- | 1,67 | down |
| 6673267 | 7033672 | 970342  | --- | --- | --- | 1,16 | down |
| 6673271 | 7374842 | 1808994 | --- | --- | --- | 1,02 | up   |
| 6673287 | 7261668 | 1526982 | --- | --- | --- | 1,90 | down |
| 6673301 | 7056333 | 1023703 | --- | --- | --- | 1,10 | up   |
| 6673325 | 7373678 | 1805858 | --- | --- | --- | 1,00 | down |
| 6673492 | 7226241 | 1437767 | --- | --- | --- | 1,28 | up   |
| 6673527 | 7116614 | 1168800 | --- | --- | --- | 1,49 | down |
| 6673553 | 7142081 | 1230975 | --- | --- | --- | 1,83 | down |
| 6673716 | 7101258 | 1130574 | --- | --- | --- | 1,09 | down |
| 6673796 | 7060851 | 1033401 | --- | --- | --- | 1,17 | up   |
| 6673806 | 7243098 | 1480754 | --- | --- | --- | 1,34 | down |
| 6673832 | 7312566 | 1653307 | --- | --- | --- | 1,45 | down |
| 6673920 | 7073854 | 1065631 | --- | --- | --- | 1,68 | down |
| 6673969 | 7180861 | 1327187 | --- | --- | --- | 1,06 | up   |
| 6673993 | 7034293 | 971994  | --- | --- | --- | 1,17 | up   |
| 6674021 | 7052813 | 1015921 | --- | --- | --- | 1,25 | down |
| 6674088 | 7257976 | 1517713 | --- | --- | --- | 2,55 | down |
| 6674139 | 7045955 | 1000763 | --- | --- | --- | 2,54 | down |
| 6674196 | 7358053 | 1764845 | --- | --- | --- | 1,40 | down |
| 6674202 | 7050167 | 1009815 | --- | --- | --- | 1,18 | down |
| 6674210 | 7036412 | 976865  | --- | --- | --- | 1,08 | down |
| 6674220 | 7152726 | 1257080 | --- | --- | --- | 1,19 | down |
| 6674261 | 7271128 | 1550313 | --- | --- | --- | 1,09 | down |

|         |         |         |     |     |     |      |      |
|---------|---------|---------|-----|-----|-----|------|------|
| 6674316 | 7331297 | 1698812 | --- | --- | --- | 1,03 | up   |
| 6674348 | 7299512 | 1620558 | --- | --- | --- | 1,27 | down |
| 6674393 | 7060851 | 1033425 | --- | --- | --- | 1,05 | down |
| 6674485 | 7034603 | 972877  | --- | --- | --- | 1,64 | up   |
| 6674496 | 7033672 | 970337  | --- | --- | --- | 1,29 | up   |
| 6674594 | 7199341 | 1374122 | --- | --- | --- | 1,03 | down |
| 6674617 | 7064856 | 1043215 | --- | --- | --- | 1,61 | up   |
| 6674666 | 7323545 | 1679944 | --- | --- | --- | 1,05 | down |
| 6674710 | 7069830 | 1055609 | --- | --- | --- | 1,26 | up   |
| 6674719 | 7033672 | 970336  | --- | --- | --- | 1,02 | down |
| 6674759 | 7296860 | 1613437 | --- | --- | --- | 5,70 | down |
| 6674799 | 7087805 | 1097457 | --- | --- | --- | 1,75 | down |
| 6674817 | 7199476 | 1374541 | --- | --- | --- | 1,02 | down |
| 6674818 | 7102369 | 1133412 | --- | --- | --- | 1,43 | down |
| 6675029 | 7172373 | 1305586 | --- | --- | --- | 1,21 | down |
| 6675042 | 7346066 | 1735301 | --- | --- | --- | 1,40 | up   |
| 6675211 | 7312566 | 1653299 | --- | --- | --- | 1,31 | down |
| 6675348 | 7203872 | 1384768 | --- | --- | --- | 1,30 | down |
| 6675377 | 7068853 | 1053097 | --- | --- | --- | 1,03 | down |
| 6675449 | 7053874 | 1018333 | --- | --- | --- | 1,07 | down |
| 6675611 | 7350237 | 1745473 | --- | --- | --- | 1,02 | down |
| 6675626 | 7159177 | 1273344 | --- | --- | --- | 1,06 | down |
| 6675969 | 7161841 | 1279882 | --- | --- | --- | 2,22 | down |
| 6676007 | 7095956 | 1117045 | --- | --- | --- | 1,15 | down |
| 6676062 | 7036412 | 976874  | --- | --- | --- | 1,02 | down |
| 6676145 | 7190844 | 1352111 | --- | --- | --- | 1,01 | down |
| 6676262 | 7131360 | 1204972 | --- | --- | --- | 1,08 | down |
| 6676278 | 7230698 | 1449064 | --- | --- | --- | 1,30 | down |
| 6676312 | 7357815 | 1764132 | --- | --- | --- | 1,08 | up   |
| 6676510 | 7127797 | 1195852 | --- | --- | --- | 1,07 | up   |
| 6676530 | 7359453 | 1768453 | --- | --- | --- | 1,04 | down |
| 6676671 | 7344702 | 1732143 | --- | --- | --- | 1,00 | up   |
| 6676680 | 7340757 | 1721885 | --- | --- | --- | 1,42 | down |
| 6676715 | 7064224 | 1041786 | --- | --- | --- | 1,70 | down |
| 6677008 | 7098077 | 1122798 | --- | --- | --- | 1,12 | up   |
| 6677011 | 7199476 | 1374531 | --- | --- | --- | 1,19 | down |
| 6677154 | 7224035 | 1432383 | --- | --- | --- | 1,12 | down |
| 6677204 | 7381993 | 1825217 | --- | --- | --- | 2,01 | up   |
| 6677250 | 7352044 | 1750004 | --- | --- | --- | 1,16 | up   |
| 6677292 | 7341397 | 1723636 | --- | --- | --- | 1,33 | up   |
| 6677298 | 7343052 | 1727548 | --- | --- | --- | 1,20 | up   |
| 6677302 | 7121866 | 1181877 | --- | --- | --- | 1,96 | up   |
| 6677317 | 7329135 | 1693492 | --- | --- | --- | 2,15 | down |
| 6677333 | 7217650 | 1417162 | --- | --- | --- | 1,19 | down |
| 6677345 | 7032204 | 966137  | --- | --- | --- | 1,41 | up   |
| 6677386 | 7231835 | 1452277 | --- | --- | --- | 1,22 | down |
| 6677390 | 7196187 | 1365978 | --- | --- | --- | 1,24 | up   |
| 6677438 | 7064220 | 1041767 | --- | --- | --- | 1,00 | up   |
| 6677448 | 7247848 | 1492063 | --- | --- | --- | 1,23 | up   |
| 6677458 | 7344836 | 1732409 | --- | --- | --- | 1,03 | down |
| 6677502 | 7086664 | 1094288 | --- | --- | --- | 1,05 | up   |
| 6677616 | 7182713 | 1332528 | --- | --- | --- | 1,49 | up   |
| 6677621 | 7323545 | 1679948 | --- | --- | --- | 1,45 | down |
| 6677659 | 7052385 | 1014788 | --- | --- | --- | 1,04 | up   |
| 6677706 | 7249503 | 1496231 | --- | --- | --- | 1,55 | down |
| 6677809 | 7127691 | 1195638 | --- | --- | --- | 2,16 | down |

|         |         |         |     |     |     |      |      |
|---------|---------|---------|-----|-----|-----|------|------|
| 6677830 | 7384073 | 1829464 | --- | --- | --- | 1,10 | up   |
| 6677859 | 7367994 | 1789247 | --- | --- | --- | 1,07 | down |
| 6678069 | 7338807 | 1716832 | --- | --- | --- | 1,36 | down |
| 6678086 | 7163002 | 1282279 | --- | --- | --- | 1,18 | down |
| 6678105 | 7092965 | 1110204 | --- | --- | --- | 2,09 | up   |
| 6678148 | 7093936 | 1112478 | --- | --- | --- | 1,15 | up   |
| 6678190 | 7217679 | 1417315 | --- | --- | --- | 1,54 | down |
| 6678198 | 7188909 | 1346805 | --- | --- | --- | 1,16 | down |
| 6678255 | 7033672 | 970367  | --- | --- | --- | 2,23 | down |
| 6678334 | 7293757 | 1605673 | --- | --- | --- | 1,20 | down |
| 6678405 | 7249503 | 1496239 | --- | --- | --- | 1,23 | down |
| 6678443 | 7267380 | 1540432 | --- | --- | --- | 1,38 | up   |
| 6678444 | 7146982 | 1243277 | --- | --- | --- | 1,03 | up   |
| 6678449 | 7181169 | 1328155 | --- | --- | --- | 1,86 | up   |
| 6678515 | 7071264 | 1059284 | --- | --- | --- | 2,47 | up   |
| 6678603 | 7297589 | 1615612 | --- | --- | --- | 1,02 | up   |
| 6678623 | 7274892 | 1559568 | --- | --- | --- | 1,23 | up   |
| 6678639 | 7198274 | 1371194 | --- | --- | --- | 1,06 | up   |
| 6678835 | 7243647 | 1482473 | --- | --- | --- | 1,90 | up   |
| 6678867 | 7373417 | 1805109 | --- | --- | --- | 1,06 | down |
| 6678921 | 7072552 | 1062130 | --- | --- | --- | 1,26 | down |
| 6678929 | 7109424 | 1151112 | --- | --- | --- | 2,01 | up   |
| 6678960 | 7122486 | 1183415 | --- | --- | --- | 1,01 | down |
| 6679038 | 7166497 | 1290381 | --- | --- | --- | 1,11 | up   |
| 6679079 | 7125348 | 1190100 | --- | --- | --- | 1,28 | up   |
| 6679092 | 7253272 | 1505658 | --- | --- | --- | 1,02 | up   |
| 6679106 | 7120010 | 1177375 | --- | --- | --- | 1,10 | up   |
| 6679195 | 7294151 | 1606610 | --- | --- | --- | 1,65 | down |
| 6679261 | 7243130 | 1480940 | --- | --- | --- | 1,00 | up   |
| 6679281 | 7056333 | 1023673 | --- | --- | --- | 1,41 | down |
| 6679393 | 7079600 | 1078632 | --- | --- | --- | 1,12 | down |
| 6679434 | 7240569 | 1475401 | --- | --- | --- | 1,74 | down |
| 6679588 | 7042382 | 991295  | --- | --- | --- | 2,00 | up   |
| 6679661 | 7368004 | 1789335 | --- | --- | --- | 1,05 | down |
| 6679704 | 7315571 | 1661003 | --- | --- | --- | 1,24 | down |
| 6679731 | 7139026 | 1223491 | --- | --- | --- | 1,08 | up   |
| 6680038 | 7363568 | 1778134 | --- | --- | --- | 1,15 | up   |
| 6680087 | 7325674 | 1685228 | --- | --- | --- | 1,04 | down |
| 6680112 | 7331719 | 1699915 | --- | --- | --- | 1,81 | down |
| 6680146 | 7335700 | 1708717 | --- | --- | --- | 2,38 | up   |
| 6680248 | 7338807 | 1716800 | --- | --- | --- | 1,33 | up   |
| 6680260 | 7351951 | 1749842 | --- | --- | --- | 1,02 | up   |
| 6680355 | 7087805 | 1097456 | --- | --- | --- | 1,26 | down |
| 6680407 | 7122486 | 1183421 | --- | --- | --- | 1,30 | up   |
| 6680423 | 7029770 | 960158  | --- | --- | --- | 1,14 | down |
| 6680453 | 7303616 | 1631353 | --- | --- | --- | 1,24 | down |
| 6680471 | 7329846 | 1694991 | --- | --- | --- | 1,87 | down |
| 6680577 | 7344838 | 1732451 | --- | --- | --- | 1,47 | down |
| 6680667 | 7329135 | 1693500 | --- | --- | --- | 1,02 | up   |
| 6680779 | 7189689 | 1349057 | --- | --- | --- | 1,45 | down |
| 6680841 | 7344530 | 1731578 | --- | --- | --- | 1,23 | up   |
| 6680848 | 7189574 | 1348695 | --- | --- | --- | 1,03 | down |
| 6680879 | 7222221 | 1428081 | --- | --- | --- | 1,29 | up   |
| 6680925 | 7074132 | 1066321 | --- | --- | --- | 1,40 | down |
| 6680929 | 7211144 | 1401547 | --- | --- | --- | 1,32 | down |
| 6681053 | 7102976 | 1135057 | --- | --- | --- | 1,08 | up   |

|         |         |         |     |     |     |      |      |
|---------|---------|---------|-----|-----|-----|------|------|
| 6681087 | 7243130 | 1480944 | --- | --- | --- | 1,02 | up   |
| 6681243 | 7248790 | 1494536 | --- | --- | --- | 1,09 | up   |
| 6681368 | 7243653 | 1482525 | --- | --- | --- | 1,05 | up   |
| 6681402 | 7241136 | 1476731 | --- | --- | --- | 1,09 | up   |
| 6681411 | 7301879 | 1626618 | --- | --- | --- | 1,36 | down |
| 6681601 | 7322260 | 1677066 | --- | --- | --- | 1,00 | up   |
| 6681672 | 7291054 | 1599389 | --- | --- | --- | 1,21 | down |
| 6681675 | 7358859 | 1767003 | --- | --- | --- | 1,04 | up   |
| 6681731 | 7148978 | 1248499 | --- | --- | --- | 1,08 | up   |
| 6681793 | 7096859 | 1119309 | --- | --- | --- | 1,79 | down |
| 6682039 | 7099573 | 1126725 | --- | --- | --- | 1,37 | up   |
| 6682066 | 7053874 | 1018308 | --- | --- | --- | 1,27 | up   |
| 6682078 | 7248790 | 1494528 | --- | --- | --- | 1,04 | down |
| 6682120 | 7249503 | 1496191 | --- | --- | --- | 1,06 | down |
| 6682259 | 7298692 | 1618409 | --- | --- | --- | 1,30 | down |
| 6682286 | 7049689 | 1008897 | --- | --- | --- | 1,33 | down |
| 6682380 | 7099030 | 1125336 | --- | --- | --- | 1,91 | down |
| 6682432 | 7243647 | 1482472 | --- | --- | --- | 1,10 | up   |
| 6682434 | 7096589 | 1118504 | --- | --- | --- | 1,72 | up   |
| 6682673 | 7228848 | 1444755 | --- | --- | --- | 1,03 | down |
| 6682707 | 7156061 | 1265821 | --- | --- | --- | 1,15 | up   |
| 6682750 | 7244288 | 1484128 | --- | --- | --- | 1,07 | down |
| 6682770 | 7030127 | 960857  | --- | --- | --- | 1,03 | up   |
| 6682810 | 7060851 | 1033399 | --- | --- | --- | 1,09 | up   |
| 6682823 | 7373633 | 1805701 | --- | --- | --- | 1,10 | up   |
| 6682827 | 7025652 | 950322  | --- | --- | --- | 1,16 | down |
| 6682835 | 7040260 | 986066  | --- | --- | --- | 1,23 | down |
| 6682843 | 7045955 | 1000736 | --- | --- | --- | 1,18 | up   |
| 6682855 | 7037764 | 980039  | --- | --- | --- | 1,20 | down |
| 6682907 | 7339379 | 1718355 | --- | --- | --- | 1,17 | down |
| 6682939 | 7051009 | 1011783 | --- | --- | --- | 1,26 | down |
| 6682998 | 7330238 | 1695950 | --- | --- | --- | 1,01 | up   |
| 6683004 | 7034293 | 971945  | --- | --- | --- | 2,96 | up   |
| 6683289 | 7101400 | 1130919 | --- | --- | --- | 1,36 | up   |
| 6683320 | 7364346 | 1779979 | --- | --- | --- | 1,31 | up   |
| 6683323 | 7243603 | 1482283 | --- | --- | --- | 1,10 | up   |
| 6683392 | 7031774 | 964662  | --- | --- | --- | 1,29 | up   |
| 6683450 | 7049399 | 1008414 | --- | --- | --- | 1,03 | down |
| 6683495 | 7373633 | 1805703 | --- | --- | --- | 1,38 | up   |
| 6683521 | 7331434 | 1699231 | --- | --- | --- | 2,99 | down |
| 6683531 | 7211363 | 1402042 | --- | --- | --- | 1,28 | up   |
| 6683626 | 7233923 | 1458165 | --- | --- | --- | 1,88 | up   |
| 6683638 | 7170845 | 1301881 | --- | --- | --- | 1,07 | down |
| 6683723 | 7069830 | 1055641 | --- | --- | --- | 1,19 | down |
| 6683819 | 7084193 | 1089126 | --- | --- | --- | 1,06 | up   |
| 6683962 | 7312627 | 1653486 | --- | --- | --- | 1,49 | down |
| 6683967 | 7087965 | 1098057 | --- | --- | --- | 1,22 | down |
| 6683981 | 7334331 | 1705699 | --- | --- | --- | 1,28 | down |
| 6684136 | 7373417 | 1805126 | --- | --- | --- | 1,72 | down |
| 6684151 | 7364948 | 1781232 | --- | --- | --- | 1,10 | down |
| 6684211 | 7036412 | 976873  | --- | --- | --- | 1,05 | up   |
| 6684289 | 7117832 | 1171754 | --- | --- | --- | 2,03 | down |
| 6684319 | 7087282 | 1096204 | --- | --- | --- | 1,85 | up   |
| 6684325 | 7237132 | 1466115 | --- | --- | --- | 1,02 | up   |
| 6684405 | 7350993 | 1747548 | --- | --- | --- | 1,10 | down |
| 6684510 | 7271128 | 1550313 | --- | --- | --- | 1,06 | up   |

|         |         |         |     |     |     |      |      |
|---------|---------|---------|-----|-----|-----|------|------|
| 6684610 | 7080731 | 1080974 | --- | --- | --- | 1,31 | down |
| 6684647 | 7349643 | 1744149 | --- | --- | --- | 1,07 | up   |
| 6684732 | 7226241 | 1437812 | --- | --- | --- | 1,20 | up   |
| 6684855 | 7075424 | 1069289 | --- | --- | --- | 1,15 | up   |
| 6684924 | 7340304 | 1720857 | --- | --- | --- | 1,17 | down |
| 6684930 | 7244288 | 1484116 | --- | --- | --- | 1,15 | up   |
| 6685124 | 7242451 | 1479346 | --- | --- | --- | 1,29 | down |
| 6685150 | 7248790 | 1494561 | --- | --- | --- | 1,66 | down |
| 6685199 | 7244288 | 1484100 | --- | --- | --- | 2,63 | up   |
| 6685310 | 7070616 | 1057790 | --- | --- | --- | 1,68 | down |
| 6685327 | 7086966 | 1095264 | --- | --- | --- | 1,07 | up   |
| 6685424 | 7157341 | 1269278 | --- | --- | --- | 1,56 | down |
| 6685481 | 7155286 | 1263908 | --- | --- | --- | 1,22 | down |
| 6685530 | 7315206 | 1660029 | --- | --- | --- | 1,46 | up   |
| 6685584 | 7239752 | 1473193 | --- | --- | --- | 1,38 | down |
| 6685612 | 7180949 | 1327485 | --- | --- | --- | 1,67 | down |
| 6685622 | 7361420 | 1773055 | --- | --- | --- | 1,14 | up   |
| 6685637 | 7358859 | 1767018 | --- | --- | --- | 2,34 | down |
| 6685639 | 7222221 | 1428088 | --- | --- | --- | 1,01 | down |
| 6685902 | 7243647 | 1482447 | --- | --- | --- | 1,18 | down |
| 6685910 | 7293234 | 1604336 | --- | --- | --- | 1,31 | up   |
| 6686004 | 7038530 | 981858  | --- | --- | --- | 1,60 | down |
| 6686107 | 7116103 | 1167604 | --- | --- | --- | 1,19 | up   |
| 6686170 | 7072552 | 1062125 | --- | --- | --- | 1,30 | up   |
| 6686177 | 7244288 | 1484127 | --- | --- | --- | 1,82 | down |
| 6686303 | 7289069 | 1594419 | --- | --- | --- | 2,36 | down |
| 6686393 | 7352635 | 1751443 | --- | --- | --- | 1,17 | up   |
| 6686394 | 7217650 | 1417198 | --- | --- | --- | 1,02 | down |
| 6686519 | 7238199 | 1468930 | --- | --- | --- | 1,58 | up   |
| 6686641 | 7297589 | 1615678 | --- | --- | --- | 1,01 | up   |
| 6686677 | 7217747 | 1417472 | --- | --- | --- | 1,39 | up   |
| 6686694 | 7181105 | 1327962 | --- | --- | --- | 1,13 | up   |
| 6686706 | 7364346 | 1779998 | --- | --- | --- | 1,01 | up   |
| 6686720 | 7131550 | 1205567 | --- | --- | --- | 1,05 | down |
| 6686868 | 7113483 | 1161019 | --- | --- | --- | 1,07 | down |
| 6687079 | 7243628 | 1482366 | --- | --- | --- | 1,11 | down |
| 6687104 | 7156061 | 1265816 | --- | --- | --- | 1,17 | up   |
| 6687190 | 7189689 | 1349038 | --- | --- | --- | 1,00 | up   |
| 6687310 | 7297589 | 1615635 | --- | --- | --- | 1,21 | up   |
| 6687384 | 7133612 | 1210295 | --- | --- | --- | 1,03 | up   |
| 6687438 | 7123421 | 1185811 | --- | --- | --- | 1,47 | down |
| 6687465 | 7241163 | 1476819 | --- | --- | --- | 2,11 | up   |
| 6687503 | 7235069 | 1460993 | --- | --- | --- | 1,01 | up   |
| 6687516 | 7059766 | 1030975 | --- | --- | --- | 1,50 | down |
| 6687531 | 7086664 | 1094266 | --- | --- | --- | 1,19 | down |
| 6687809 | 7075424 | 1069291 | --- | --- | --- | 1,38 | down |
| 6687847 | 7283819 | 1582120 | --- | --- | --- | 1,00 | up   |
| 6687915 | 7303616 | 1631388 | --- | --- | --- | 1,25 | up   |
| 6688006 | 7096924 | 1119611 | --- | --- | --- | 1,24 | up   |
| 6688011 | 7029770 | 960148  | --- | --- | --- | 1,03 | up   |
| 6688017 | 7362184 | 1774821 | --- | --- | --- | 1,00 | up   |
| 6688088 | 7280743 | 1574491 | --- | --- | --- | 1,03 | down |
| 6688155 | 7265259 | 1535446 | --- | --- | --- | 1,15 | down |
| 6688301 | 7071264 | 1059325 | --- | --- | --- | 1,48 | up   |
| 6688324 | 7284501 | 1583865 | --- | --- | --- | 1,67 | up   |
| 6688351 | 7067670 | 1050321 | --- | --- | --- | 1,84 | up   |



|         |         |         |     |     |     |      |      |
|---------|---------|---------|-----|-----|-----|------|------|
| 6688667 | 7301890 | 1626678 | --- | --- | --- | 1,10 | up   |
| 6688749 | 7198644 | 1372285 | --- | --- | --- | 2,20 | down |
| 6688761 | 7186464 | 1341383 | --- | --- | --- | 1,09 | up   |
| 6688922 | 7052385 | 1014787 | --- | --- | --- | 1,02 | up   |
| 6688981 | 7297154 | 1614215 | --- | --- | --- | 1,17 | down |
| 6689023 | 7330737 | 1697221 | --- | --- | --- | 1,39 | down |
| 6689042 | 7121866 | 1181879 | --- | --- | --- | 1,14 | up   |
| 6689085 | 7239939 | 1473786 | --- | --- | --- | 1,17 | down |
| 6689093 | 7249737 | 1496747 | --- | --- | --- | 1,39 | up   |
| 6689118 | 7322020 | 1676642 | --- | --- | --- | 1,17 | up   |
| 6689225 | 7329135 | 1693497 | --- | --- | --- | 1,59 | down |
| 6689563 | 7188822 | 1346632 | --- | --- | --- | 1,04 | up   |
| 6689572 | 7290585 | 1598178 | --- | --- | --- | 1,04 | up   |
| 6689616 | 7329135 | 1693500 | --- | --- | --- | 1,06 | down |
| 6689665 | 7043535 | 994111  | --- | --- | --- | 1,15 | down |
| 6689667 | 7143904 | 1235801 | --- | --- | --- | 1,11 | up   |
| 6689705 | 7087965 | 1098025 | --- | --- | --- | 1,04 | down |
| 6689741 | 7311218 | 1650359 | --- | --- | --- | 1,51 | down |
| 6689750 | 7070616 | 1057777 | --- | --- | --- | 1,04 | up   |
| 6689832 | 7303616 | 1631314 | --- | --- | --- | 1,20 | down |
| 6689870 | 7264274 | 1533167 | --- | --- | --- | 1,01 | up   |
| 6689939 | 7339110 | 1717617 | --- | --- | --- | 1,09 | down |
| 6689949 | 7097525 | 1121063 | --- | --- | --- | 1,18 | down |
| 6690012 | 7345465 | 1733848 | --- | --- | --- | 1,25 | up   |
| 6690175 | 7243653 | 1482531 | --- | --- | --- | 1,06 | down |
| 6690233 | 7279793 | 1572538 | --- | --- | --- | 1,34 | down |
| 6690244 | 7378637 | 1817832 | --- | --- | --- | 1,27 | down |
| 6690287 | 7373678 | 1805869 | --- | --- | --- | 1,12 | up   |
| 6690351 | 7280743 | 1574499 | --- | --- | --- | 1,29 | up   |
| 6690410 | 7170764 | 1301487 | --- | --- | --- | 1,27 | down |
| 6690481 | 7297274 | 1614653 | --- | --- | --- | 1,14 | down |
| 6690629 | 7367994 | 1789251 | --- | --- | --- | 1,02 | down |
| 6690641 | 7033337 | 969492  | --- | --- | --- | 1,00 | down |
| 6690678 | 7247228 | 1490516 | --- | --- | --- | 1,32 | up   |
| 6690681 | 7083030 | 1086260 | --- | --- | --- | 1,06 | down |
| 6690697 | 7060851 | 1033431 | --- | --- | --- | 1,02 | down |
| 6690932 | 7035344 | 974297  | --- | --- | --- | 1,59 | down |
| 6690962 | 7294151 | 1606631 | --- | --- | --- | 1,04 | up   |
| 6691033 | 7030127 | 960865  | --- | --- | --- | 1,67 | up   |
| 6691060 | 7050780 | 1011372 | --- | --- | --- | 1,22 | down |
| 6691228 | 7283819 | 1582119 | --- | --- | --- | 1,68 | down |
| 6691233 | 7111244 | 1155385 | --- | --- | --- | 1,05 | up   |
| 6691255 | 7274892 | 1559563 | --- | --- | --- | 1,03 | up   |
| 6691309 | 7327169 | 1688439 | --- | --- | --- | 2,37 | up   |
| 6691425 | 7276231 | 1563116 | --- | --- | --- | 1,24 | up   |
| 6691555 | 7078273 | 1075820 | --- | --- | --- | 1,26 | down |
| 6691700 | 7248964 | 1494938 | --- | --- | --- | 1,12 | up   |
| 6691702 | 7118356 | 1173130 | --- | --- | --- | 1,05 | down |
| 6691754 | 7339110 | 1717613 | --- | --- | --- | 1,93 | down |
| 6691772 | 7243130 | 1480861 | --- | --- | --- | 1,07 | up   |
| 6691837 | 7298008 | 1616670 | --- | --- | --- | 1,04 | up   |
| 6691861 | 7123357 | 1185595 | --- | --- | --- | 2,06 | down |
| 6691899 | 7329846 | 1695004 | --- | --- | --- | 2,14 | down |
| 6691921 | 7123357 | 1185607 | --- | --- | --- | 1,75 | down |
| 6692121 | 7339286 | 1718108 | --- | --- | --- | 1,59 | up   |
| 6692124 | 7142081 | 1230973 | --- | --- | --- | 1,12 | down |

|         |         |         |     |     |     |      |      |
|---------|---------|---------|-----|-----|-----|------|------|
| 6692265 | 7303616 | 1631342 | --- | --- | --- | 1,03 | down |
| 6692290 | 7071264 | 1059284 | --- | --- | --- | 1,00 | down |
| 6692323 | 7338807 | 1716788 | --- | --- | --- | 1,30 | down |
| 6692473 | 7038530 | 981870  | --- | --- | --- | 1,19 | down |
| 6692500 | 7025652 | 950359  | --- | --- | --- | 1,29 | down |
| 6692558 | 7060851 | 1033395 | --- | --- | --- | 1,14 | up   |
| 6692763 | 7116103 | 1167602 | --- | --- | --- | 3,14 | up   |
| 6692766 | 7247954 | 1492403 | --- | --- | --- | 1,07 | down |
| 6692811 | 7055876 | 1022487 | --- | --- | --- | 1,06 | down |
| 6692816 | 7112225 | 1157608 | --- | --- | --- | 1,00 | up   |
| 6693091 | 7261592 | 1526834 | --- | --- | --- | 1,09 | down |
| 6693151 | 7156052 | 1265784 | --- | --- | --- | 1,37 | down |
| 6693238 | 7316644 | 1664036 | --- | --- | --- | 1,12 | down |
| 6693246 | 7254040 | 1507609 | --- | --- | --- | 1,01 | up   |
| 6693270 | 7377583 | 1815458 | --- | --- | --- | 1,63 | down |
| 6693279 | 7039308 | 983921  | --- | --- | --- | 1,30 | down |
| 6693414 | 7268693 | 1544213 | --- | --- | --- | 3,41 | down |
| 6693417 | 7316644 | 1664022 | --- | --- | --- | 1,14 | down |
| 6693436 | 7143904 | 1235805 | --- | --- | --- | 2,03 | up   |
| 6693526 | 7182713 | 1332529 | --- | --- | --- | 1,04 | up   |
| 6693682 | 7037764 | 980097  | --- | --- | --- | 1,03 | up   |
| 6693700 | 7112562 | 1158610 | --- | --- | --- | 1,12 | up   |
| 6693731 | 7321029 | 1674832 | --- | --- | --- | 1,02 | up   |
| 6693761 | 7148978 | 1248527 | --- | --- | --- | 1,04 | down |
| 6693782 | 7055876 | 1022469 | --- | --- | --- | 1,56 | down |
| 6693917 | 7189778 | 1349289 | --- | --- | --- | 2,47 | down |
| 6694007 | 7069253 | 1054175 | --- | --- | --- | 1,16 | up   |
| 6694055 | 7376566 | 1812878 | --- | --- | --- | 1,35 | up   |
| 6694128 | 7127390 | 1195048 | --- | --- | --- | 1,10 | down |
| 6694169 | 7068853 | 1053102 | --- | --- | --- | 1,11 | up   |
| 6694192 | 7360486 | 1770995 | --- | --- | --- | 1,03 | down |
| 6694216 | 7236358 | 1464249 | --- | --- | --- | 1,23 | down |
| 6694251 | 7097525 | 1121039 | --- | --- | --- | 1,85 | down |
| 6694344 | 7161841 | 1279879 | --- | --- | --- | 1,28 | up   |
| 6694349 | 7101258 | 1130582 | --- | --- | --- | 1,05 | up   |
| 6694362 | 7064468 | 1042347 | --- | --- | --- | 1,14 | up   |
| 6694363 | 7274892 | 1559565 | --- | --- | --- | 1,08 | down |
| 6694369 | 7180732 | 1326732 | --- | --- | --- | 1,24 | down |
| 6694543 | 7332059 | 1700732 | --- | --- | --- | 2,03 | down |
| 6694728 | 7276231 | 1563096 | --- | --- | --- | 1,00 | up   |
| 6694782 | 7217747 | 1417499 | --- | --- | --- | 1,08 | up   |
| 6694950 | 7111573 | 1156022 | --- | --- | --- | 1,13 | up   |
| 6695006 | 7358048 | 1764807 | --- | --- | --- | 1,01 | up   |
| 6695054 | 7238115 | 1468666 | --- | --- | --- | 1,09 | up   |
| 6695164 | 7312621 | 1653463 | --- | --- | --- | 1,17 | down |
| 6695229 | 7083030 | 1086258 | --- | --- | --- | 1,34 | up   |
| 6695265 | 7119930 | 1177214 | --- | --- | --- | 1,49 | down |
| 6695360 | 7297274 | 1614649 | --- | --- | --- | 1,29 | up   |
| 6695463 | 7101258 | 1130557 | --- | --- | --- | 1,47 | down |
| 6695474 | 7277783 | 1567440 | --- | --- | --- | 1,91 | down |
| 6695492 | 7097525 | 1121054 | --- | --- | --- | 1,41 | up   |
| 6695572 | 7355244 | 1758143 | --- | --- | --- | 2,15 | up   |
| 6695687 | 7247848 | 1492068 | --- | --- | --- | 1,15 | up   |
| 6695931 | 7266532 | 1538307 | --- | --- | --- | 1,06 | down |
| 6695958 | 7247954 | 1492401 | --- | --- | --- | 1,33 | up   |
| 6695994 | 7114108 | 1162444 | --- | --- | --- | 1,15 | up   |

|         |         |         |     |     |     |      |      |
|---------|---------|---------|-----|-----|-----|------|------|
| 6696044 | 7161841 | 1279877 | --- | --- | --- | 1,83 | down |
| 6696125 | 7199341 | 1374130 | --- | --- | --- | 1,24 | up   |
| 6696258 | 7355421 | 1758515 | --- | --- | --- | 1,37 | up   |
| 6696316 | 7075445 | 1069346 | --- | --- | --- | 1,14 | up   |
| 6696513 | 7254040 | 1507608 | --- | --- | --- | 1,13 | down |
| 6696545 | 7334347 | 1705780 | --- | --- | --- | 2,16 | down |
| 6696565 | 7295410 | 1609773 | --- | --- | --- | 1,04 | down |
| 6696656 | 7232340 | 1453526 | --- | --- | --- | 1,11 | up   |
| 6696699 | 7064856 | 1043215 | --- | --- | --- | 1,55 | up   |
| 6696767 | 7143904 | 1235807 | --- | --- | --- | 1,00 | down |
| 6696773 | 7231203 | 1450444 | --- | --- | --- | 1,08 | down |
| 6696858 | 7367971 | 1789109 | --- | --- | --- | 1,13 | up   |
| 6696863 | 7052567 | 1015279 | --- | --- | --- | 1,49 | down |
| 6697036 | 7247334 | 1490820 | --- | --- | --- | 1,31 | up   |
| 6697058 | 7289909 | 1596509 | --- | --- | --- | 1,01 | up   |
| 6697243 | 7213679 | 1407136 | --- | --- | --- | 1,25 | up   |
| 6697260 | 7303616 | 1631328 | --- | --- | --- | 1,10 | up   |
| 6697286 | 7088164 | 1098481 | --- | --- | --- | 1,60 | down |
| 6697335 | 7054958 | 1020582 | --- | --- | --- | 1,08 | up   |
| 6697372 | 7096589 | 1118516 | --- | --- | --- | 1,08 | down |
| 6697394 | 7096924 | 1119617 | --- | --- | --- | 1,05 | up   |
| 6697405 | 7086966 | 1095283 | --- | --- | --- | 1,18 | down |
| 6697413 | 7334347 | 1705776 | --- | --- | --- | 1,24 | down |
| 6697561 | 7243603 | 1482260 | --- | --- | --- | 1,15 | up   |
| 6697563 | 7265259 | 1535437 | --- | --- | --- | 1,71 | up   |
| 6697650 | 7092965 | 1110179 | --- | --- | --- | 1,07 | down |
| 6697662 | 7263152 | 1530377 | --- | --- | --- | 1,26 | up   |
| 6697718 | 7351951 | 1749824 | --- | --- | --- | 1,08 | down |
| 6697773 | 7037764 | 979975  | --- | --- | --- | 1,28 | down |
| 6697787 | 7209927 | 1398931 | --- | --- | --- | 1,08 | up   |
| 6697843 | 7182056 | 1330596 | --- | --- | --- | 1,10 | down |
| 6698057 | 7086522 | 1093950 | --- | --- | --- | 1,57 | up   |
| 6698130 | 7241163 | 1476819 | --- | --- | --- | 1,08 | up   |
| 6698262 | 7145669 | 1240016 | --- | --- | --- | 1,10 | up   |
| 6698366 | 7158408 | 1271348 | --- | --- | --- | 1,10 | up   |
| 6698499 | 7369712 | 1794822 | --- | --- | --- | 1,20 | up   |
| 6698538 | 7092549 | 1109148 | --- | --- | --- | 1,55 | up   |
| 6698566 | 7211144 | 1401550 | --- | --- | --- | 1,83 | down |
| 6698667 | 7149008 | 1248595 | --- | --- | --- | 1,32 | down |
| 6698714 | 7278957 | 1570395 | --- | --- | --- | 1,10 | up   |
| 6698755 | 7059020 | 1029354 | --- | --- | --- | 1,24 | down |
| 6698762 | 7113083 | 1159965 | --- | --- | --- | 1,01 | down |
| 6698887 | 7070455 | 1057352 | --- | --- | --- | 2,05 | up   |
| 6698905 | 7099573 | 1126744 | --- | --- | --- | 1,53 | up   |
| 6698967 | 7369400 | 1793983 | --- | --- | --- | 1,22 | up   |
| 6699052 | 7060851 | 1033438 | --- | --- | --- | 1,86 | down |
| 6699069 | 7069830 | 1055611 | --- | --- | --- | 1,16 | up   |
| 6699179 | 7211389 | 1402113 | --- | --- | --- | 1,12 | down |
| 6699408 | 7181105 | 1327964 | --- | --- | --- | 1,01 | up   |
| 6699441 | 7374740 | 1808620 | --- | --- | --- | 1,57 | up   |
| 6699459 | 7070140 | 1056478 | --- | --- | --- | 1,03 | down |
| 6699570 | 7303616 | 1631344 | --- | --- | --- | 1,05 | down |
| 6699591 | 7236395 | 1464344 | --- | --- | --- | 1,39 | up   |
| 6699645 | 7274892 | 1559550 | --- | --- | --- | 1,10 | down |
| 6699646 | 7336931 | 1711858 | --- | --- | --- | 1,07 | up   |
| 6699735 | 7253272 | 1505576 | --- | --- | --- | 1,65 | up   |

|         |         |         |     |     |     |      |      |
|---------|---------|---------|-----|-----|-----|------|------|
| 6699749 | 7297274 | 1614637 | --- | --- | --- | 1,22 | down |
| 6699851 | 7273983 | 1557542 | --- | --- | --- | 1,04 | up   |
| 6699930 | 7183182 | 1333565 | --- | --- | --- | 1,19 | up   |
| 6699938 | 7243130 | 1480932 | --- | --- | --- | 1,17 | up   |
| 6700195 | 7248790 | 1494527 | --- | --- | --- | 1,32 | up   |
| 6700224 | 7199476 | 1374542 | --- | --- | --- | 1,04 | down |
| 6700264 | 7217143 | 1415595 | --- | --- | --- | 1,03 | down |
| 6700314 | 7359426 | 1768366 | --- | --- | --- | 1,64 | down |
| 6700335 | 7321414 | 1675641 | --- | --- | --- | 1,04 | down |
| 6700371 | 7359426 | 1768380 | --- | --- | --- | 1,11 | down |
| 6700609 | 7092549 | 1109137 | --- | --- | --- | 1,05 | up   |
| 6700688 | 7360325 | 1770527 | --- | --- | --- | 1,31 | down |
| 6700692 | 7071714 | 1060366 | --- | --- | --- | 1,09 | up   |
| 6700751 | 7314270 | 1657750 | --- | --- | --- | 1,39 | up   |
| 6700776 | 7257976 | 1517712 | --- | --- | --- | 1,09 | down |
| 6701177 | 7235069 | 1460971 | --- | --- | --- | 1,51 | up   |
| 6701203 | 7297274 | 1614655 | --- | --- | --- | 1,21 | down |
| 6701219 | 7142416 | 1231785 | --- | --- | --- | 1,62 | up   |
| 6701309 | 7196029 | 1365615 | --- | --- | --- | 1,20 | up   |
| 6701343 | 7249737 | 1496747 | --- | --- | --- | 1,12 | up   |
| 6701349 | 7277719 | 1567068 | --- | --- | --- | 1,04 | up   |
| 6701379 | 7243130 | 1480908 | --- | --- | --- | 1,57 | down |
| 6701446 | 7076160 | 1070897 | --- | --- | --- | 1,06 | up   |
| 6701514 | 7295410 | 1609781 | --- | --- | --- | 1,03 | up   |
| 6701562 | 7099573 | 1126707 | --- | --- | --- | 1,02 | down |
| 6701588 | 7236395 | 1464313 | --- | --- | --- | 1,58 | up   |
| 6701640 | 7121866 | 1181860 | --- | --- | --- | 1,19 | down |
| 6701725 | 7303616 | 1631309 | --- | --- | --- | 1,10 | up   |
| 6701808 | 7245921 | 1487686 | --- | --- | --- | 1,07 | down |
| 6701896 | 7284359 | 1583435 | --- | --- | --- | 1,02 | down |
| 6701925 | 7287222 | 1589728 | --- | --- | --- | 1,07 | down |
| 6701935 | 7280743 | 1574514 | --- | --- | --- | 1,23 | down |
| 6701952 | 7248790 | 1494532 | --- | --- | --- | 1,07 | up   |
| 6701978 | 7200545 | 1376898 | --- | --- | --- | 1,57 | up   |
| 6702014 | 7329135 | 1693493 | --- | --- | --- | 1,10 | up   |
| 6702062 | 7147809 | 1245452 | --- | --- | --- | 1,09 | down |
| 6702063 | 7373678 | 1805865 | --- | --- | --- | 1,06 | up   |
| 6702213 | 7083030 | 1086263 | --- | --- | --- | 1,19 | down |
| 6702232 | 7112225 | 1157581 | --- | --- | --- | 1,11 | down |
| 6702293 | 7315206 | 1660036 | --- | --- | --- | 1,04 | down |
| 6702308 | 7349643 | 1744160 | --- | --- | --- | 1,09 | down |
| 6702358 | 7358048 | 1764813 | --- | --- | --- | 1,68 | up   |
| 6702419 | 7056304 | 1023520 | --- | --- | --- | 1,24 | down |
| 6702452 | 7273220 | 1555852 | --- | --- | --- | 1,01 | up   |
| 6702498 | 7054636 | 1019875 | --- | --- | --- | 2,16 | down |
| 6702864 | 7297589 | 1615599 | --- | --- | --- | 1,11 | up   |
| 6702955 | 7316644 | 1664058 | --- | --- | --- | 1,19 | down |
| 6703041 | 7159036 | 1272965 | --- | --- | --- | 1,01 | up   |
| 6703087 | 7312566 | 1653303 | --- | --- | --- | 1,59 | down |
| 6703112 | 7196029 | 1365635 | --- | --- | --- | 1,43 | up   |
| 6703116 | 7263152 | 1530353 | --- | --- | --- | 1,19 | up   |
| 6703249 | 7129841 | 1200834 | --- | --- | --- | 1,01 | down |
| 6703337 | 7098411 | 1123717 | --- | --- | --- | 1,09 | down |
| 6703401 | 7380497 | 1821844 | --- | --- | --- | 1,22 | down |
| 6703407 | 7073928 | 1065815 | --- | --- | --- | 7,09 | down |
| 6703600 | 7068259 | 1051647 | --- | --- | --- | 1,19 | up   |

|         |         |         |     |     |     |      |      |
|---------|---------|---------|-----|-----|-----|------|------|
| 6703687 | 7075445 | 1069354 | --- | --- | --- | 1,24 | up   |
| 6703767 | 7330396 | 1696339 | --- | --- | --- | 1,01 | down |
| 6703800 | 7116103 | 1167597 | --- | --- | --- | 1,66 | up   |
| 6703801 | 7095956 | 1117044 | --- | --- | --- | 1,17 | up   |
| 6703967 | 7050930 | 1011621 | --- | --- | --- | 1,03 | down |
| 6704038 | 7189184 | 1347597 | --- | --- | --- | 1,43 | down |
| 6704063 | 7067828 | 1050790 | --- | --- | --- | 1,02 | up   |
| 6704227 | 7127691 | 1195634 | --- | --- | --- | 1,08 | down |
| 6704347 | 7193056 | 1358273 | --- | --- | --- | 1,11 | down |
| 6704373 | 7369043 | 1793101 | --- | --- | --- | 1,09 | up   |
| 6704487 | 7249737 | 1496758 | --- | --- | --- | 2,44 | down |
| 6704498 | 7376566 | 1812885 | --- | --- | --- | 1,14 | down |
| 6704528 | 7125348 | 1190076 | --- | --- | --- | 1,05 | up   |
| 6704544 | 7071969 | 1060898 | --- | --- | --- | 1,37 | up   |
| 6704550 | 7238202 | 1468938 | --- | --- | --- | 1,34 | up   |
| 6704561 | 7340258 | 1720734 | --- | --- | --- | 1,77 | up   |
| 6704602 | 7221247 | 1425833 | --- | --- | --- | 1,14 | down |
| 6704707 | 7162177 | 1280583 | --- | --- | --- | 1,04 | up   |
| 6704708 | 7107321 | 1145323 | --- | --- | --- | 1,05 | up   |
| 6704727 | 7254405 | 1508639 | --- | --- | --- | 1,41 | up   |
| 6704730 | 7038530 | 981887  | --- | --- | --- | 1,13 | up   |
| 6704731 | 7341397 | 1723627 | --- | --- | --- | 1,03 | up   |
| 6704780 | 7127540 | 1195276 | --- | --- | --- | 1,04 | up   |
| 6704920 | 7340125 | 1720449 | --- | --- | --- | 1,03 | up   |
| 6705063 | 7133749 | 1210819 | --- | --- | --- | 1,46 | up   |
| 6705132 | 7297589 | 1615616 | --- | --- | --- | 1,60 | up   |
| 6705139 | 7281507 | 1576716 | --- | --- | --- | 1,13 | down |
| 6705241 | 7180861 | 1327218 | --- | --- | --- | 1,13 | down |
| 6705347 | 7203872 | 1384757 | --- | --- | --- | 1,04 | up   |
| 6705400 | 7041609 | 989589  | --- | --- | --- | 1,17 | down |
| 6705445 | 7358859 | 1766998 | --- | --- | --- | 1,19 | down |
| 6705450 | 7152726 | 1257079 | --- | --- | --- | 1,22 | down |
| 6705474 | 7349643 | 1744141 | --- | --- | --- | 1,01 | down |
| 6705507 | 7337224 | 1712623 | --- | --- | --- | 1,08 | down |
| 6705549 | 7038530 | 981867  | --- | --- | --- | 1,55 | down |
| 6705580 | 7043379 | 993646  | --- | --- | --- | 1,44 | up   |
| 6705670 | 7108551 | 1148703 | --- | --- | --- | 1,14 | up   |
| 6705792 | 7056333 | 1023674 | --- | --- | --- | 1,79 | down |
| 6705911 | 7238115 | 1468588 | --- | --- | --- | 1,23 | up   |
| 6705960 | 7287222 | 1589742 | --- | --- | --- | 1,20 | up   |
| 6705971 | 7297274 | 1614568 | --- | --- | --- | 1,09 | down |
| 6706001 | 7294151 | 1606623 | --- | --- | --- | 1,67 | up   |
| 6706077 | 7189669 | 1348981 | --- | --- | --- | 1,12 | down |
| 6706095 | 7199476 | 1374560 | --- | --- | --- | 1,08 | up   |
| 6706184 | 7119179 | 1174995 | --- | --- | --- | 1,22 | up   |
| 6706206 | 7120039 | 1177491 | --- | --- | --- | 1,36 | down |
| 6706262 | 7234425 | 1459406 | --- | --- | --- | 2,06 | up   |
| 6706271 | 7034293 | 971945  | --- | --- | --- | 2,15 | up   |
| 6706483 | 7247848 | 1492073 | --- | --- | --- | 1,22 | down |
| 6706544 | 7239752 | 1473174 | --- | --- | --- | 1,14 | down |
| 6706625 | 7340757 | 1721886 | --- | --- | --- | 1,20 | up   |
| 6706696 | 7108062 | 1147192 | --- | --- | --- | 1,78 | up   |
| 6706704 | 7211363 | 1402049 | --- | --- | --- | 1,73 | down |
| 6706940 | 7270592 | 1548561 | --- | --- | --- | 1,27 | up   |
| 6707046 | 7214363 | 1408956 | --- | --- | --- | 1,63 | down |
| 6707151 | 7231775 | 1452135 | --- | --- | --- | 1,06 | up   |

|         |         |         |     |     |     |      |      |
|---------|---------|---------|-----|-----|-----|------|------|
| 6707260 | 7339379 | 1718361 | --- | --- | --- | 1,54 | up   |
| 6707310 | 7294264 | 1606843 | --- | --- | --- | 1,26 | up   |
| 6707421 | 7098451 | 1123807 | --- | --- | --- | 1,07 | down |
| 6707440 | 7162177 | 1280583 | --- | --- | --- | 1,06 | down |
| 6707508 | 7159036 | 1272921 | --- | --- | --- | 1,14 | down |
| 6707532 | 7030127 | 960860  | --- | --- | --- | 1,48 | up   |
| 6707694 | 7316644 | 1664047 | --- | --- | --- | 1,12 | up   |
| 6707778 | 7059020 | 1029339 | --- | --- | --- | 1,80 | down |
| 6708067 | 7067614 | 1050181 | --- | --- | --- | 1,15 | down |
| 6708131 | 7279881 | 1572738 | --- | --- | --- | 1,01 | up   |
| 6708196 | 7331829 | 1700187 | --- | --- | --- | 2,82 | up   |
| 6708348 | 7237711 | 1467463 | --- | --- | --- | 1,29 | up   |
| 6708360 | 7181105 | 1327957 | --- | --- | --- | 1,73 | down |
| 6708381 | 7243647 | 1482447 | --- | --- | --- | 1,05 | up   |
| 6708477 | 7245695 | 1487085 | --- | --- | --- | 1,32 | down |
| 6708484 | 7314270 | 1657726 | --- | --- | --- | 1,20 | up   |
| 6708496 | 7363674 | 1778419 | --- | --- | --- | 1,29 | down |
| 6708523 | 7376566 | 1812870 | --- | --- | --- | 1,34 | up   |
| 6708561 | 7068942 | 1053387 | --- | --- | --- | 1,06 | down |
| 6708576 | 7239752 | 1473181 | --- | --- | --- | 1,31 | up   |
| 6708615 | 7294151 | 1606607 | --- | --- | --- | 1,98 | up   |
| 6708658 | 7080731 | 1080980 | --- | --- | --- | 1,32 | down |
| 6708705 | 7243130 | 1480912 | --- | --- | --- | 1,02 | up   |
| 6708757 | 7064134 | 1041466 | --- | --- | --- | 1,35 | down |
| 6708831 | 7114108 | 1162442 | --- | --- | --- | 1,38 | down |
| 6708849 | 7222221 | 1428061 | --- | --- | --- | 1,15 | up   |
| 6708916 | 7287222 | 1589732 | --- | --- | --- | 1,04 | up   |
| 6709049 | 7157341 | 1269261 | --- | --- | --- | 1,02 | up   |
| 6709231 | 7177520 | 1318612 | --- | --- | --- | 1,21 | up   |
| 6709240 | 7049399 | 1008395 | --- | --- | --- | 1,36 | up   |
| 6709449 | 7281494 | 1576586 | --- | --- | --- | 1,39 | up   |
| 6709608 | 7112566 | 1158626 | --- | --- | --- | 1,01 | down |
| 6709678 | 7209927 | 1398920 | --- | --- | --- | 1,13 | down |
| 6709754 | 7087492 | 1096702 | --- | --- | --- | 1,02 | up   |
| 6709755 | 7206133 | 1389967 | --- | --- | --- | 1,08 | down |
| 6709791 | 7190534 | 1351228 | --- | --- | --- | 1,37 | up   |
| 6709808 | 7233359 | 1456516 | --- | --- | --- | 1,37 | down |
| 6709823 | 7203872 | 1384781 | --- | --- | --- | 1,05 | down |
| 6709829 | 7344530 | 1731583 | --- | --- | --- | 1,18 | up   |
| 6709965 | 7233440 | 1456871 | --- | --- | --- | 1,14 | down |
| 6709968 | 7192320 | 1356036 | --- | --- | --- | 1,35 | down |
| 6709970 | 7376820 | 1813434 | --- | --- | --- | 1,90 | down |
| 6710036 | 7249503 | 1496188 | --- | --- | --- | 1,05 | up   |
| 6710070 | 7069253 | 1054162 | --- | --- | --- | 1,66 | up   |
| 6710158 | 7314115 | 1657312 | --- | --- | --- | 1,29 | up   |
| 6710206 | 7263152 | 1530354 | --- | --- | --- | 1,12 | up   |
| 6710252 | 7235069 | 1460977 | --- | --- | --- | 1,09 | down |
| 6710289 | 7297589 | 1615643 | --- | --- | --- | 1,38 | down |
| 6710388 | 7039308 | 983921  | --- | --- | --- | 1,11 | up   |
| 6710412 | 7049399 | 1008392 | --- | --- | --- | 1,08 | down |
| 6710781 | 7170764 | 1301433 | --- | --- | --- | 1,27 | down |
| 6710878 | 7115880 | 1166842 | --- | --- | --- | 1,64 | up   |
| 6710919 | 7297589 | 1615634 | --- | --- | --- | 1,06 | down |
| 6710954 | 7280743 | 1574548 | --- | --- | --- | 1,31 | down |
| 6710996 | 7299512 | 1620554 | --- | --- | --- | 1,12 | up   |
| 6711077 | 7360486 | 1770953 | --- | --- | --- | 1,02 | down |

|         |         |         |     |     |     |      |      |
|---------|---------|---------|-----|-----|-----|------|------|
| 6711086 | 7284359 | 1583437 | --- | --- | --- | 1,01 | up   |
| 6711121 | 7241136 | 1476720 | --- | --- | --- | 2,01 | down |
| 6711169 | 7067614 | 1050196 | --- | --- | --- | 1,05 | down |
| 6711233 | 7125348 | 1190073 | --- | --- | --- | 1,02 | up   |
| 6711261 | 7233440 | 1456842 | --- | --- | --- | 1,46 | up   |
| 6711298 | 7072765 | 1062743 | --- | --- | --- | 1,05 | up   |
| 6711463 | 7340990 | 1722505 | --- | --- | --- | 1,11 | up   |
| 6711569 | 7062173 | 1036977 | --- | --- | --- | 1,16 | down |
| 6711590 | 7115880 | 1166815 | --- | --- | --- | 1,43 | up   |
| 6711644 | 7183182 | 1333553 | --- | --- | --- | 1,03 | down |
| 6711722 | 7321029 | 1674803 | --- | --- | --- | 1,15 | up   |
| 6711778 | 7267380 | 1540403 | --- | --- | --- | 1,29 | up   |
| 6711920 | 7039223 | 983572  | --- | --- | --- | 1,07 | down |
| 6711960 | 7141421 | 1229479 | --- | --- | --- | 1,99 | up   |
| 6712007 | 7097525 | 1121060 | --- | --- | --- | 1,12 | up   |
| 6712092 | 7339110 | 1717614 | --- | --- | --- | 1,02 | up   |
| 6712094 | 7235503 | 1462084 | --- | --- | --- | 1,26 | up   |
| 6712137 | 7226241 | 1437769 | --- | --- | --- | 1,01 | down |
| 6712278 | 7035344 | 974296  | --- | --- | --- | 1,07 | down |
| 6712757 | 7277719 | 1567070 | --- | --- | --- | 1,30 | up   |
| 6712770 | 7368004 | 1789332 | --- | --- | --- | 1,10 | down |
| 6713026 | 7276231 | 1563114 | --- | --- | --- | 1,20 | up   |
| 6713053 | 7330396 | 1696363 | --- | --- | --- | 1,26 | up   |
| 6713321 | 7161992 | 1280153 | --- | --- | --- | 1,65 | up   |
| 6713366 | 7299512 | 1620557 | --- | --- | --- | 1,21 | up   |
| 6713379 | 7280743 | 1574481 | --- | --- | --- | 1,45 | down |
| 6713427 | 7243603 | 1482263 | --- | --- | --- | 1,02 | down |
| 6713433 | 7263152 | 1530366 | --- | --- | --- | 1,45 | down |
| 6713435 | 7277719 | 1567087 | --- | --- | --- | 1,10 | down |
| 6713516 | 7030454 | 961550  | --- | --- | --- | 1,42 | up   |
| 6713550 | 7340125 | 1720448 | --- | --- | --- | 3,30 | down |
| 6713586 | 7243603 | 1482266 | --- | --- | --- | 1,13 | down |
| 6713731 | 7378997 | 1818668 | --- | --- | --- | 1,08 | down |
| 6713762 | 7083160 | 1086555 | --- | --- | --- | 2,26 | up   |
| 6713891 | 7094139 | 1112917 | --- | --- | --- | 1,62 | up   |
| 6713973 | 7340057 | 1720328 | --- | --- | --- | 1,04 | up   |
| 6713981 | 7041609 | 989552  | --- | --- | --- | 1,01 | up   |
| 6714031 | 7336931 | 1711897 | --- | --- | --- | 1,25 | down |
| 6714087 | 7233440 | 1456869 | --- | --- | --- | 1,19 | up   |
| 6714434 | 7319259 | 1670400 | --- | --- | --- | 1,17 | down |
| 6714454 | 7264797 | 1534434 | --- | --- | --- | 1,52 | up   |
| 6714473 | 7231203 | 1450444 | --- | --- | --- | 1,15 | down |
| 6714487 | 7115362 | 1165593 | --- | --- | --- | 1,40 | up   |
| 6714492 | 7049399 | 1008348 | --- | --- | --- | 1,01 | down |
| 6714578 | 7373678 | 1805874 | --- | --- | --- | 1,09 | up   |
| 6714607 | 7261668 | 1526981 | --- | --- | --- | 1,15 | up   |
| 6714637 | 7276650 | 1564132 | --- | --- | --- | 1,13 | down |
| 6714693 | 7099156 | 1125643 | --- | --- | --- | 1,46 | up   |
| 6714766 | 7062173 | 1037017 | --- | --- | --- | 1,01 | up   |
| 6714883 | 7170845 | 1301886 | --- | --- | --- | 1,03 | up   |
| 6714940 | 7174149 | 1310534 | --- | --- | --- | 1,42 | up   |
| 6715012 | 7071969 | 1060897 | --- | --- | --- | 1,31 | up   |
| 6715031 | 7380497 | 1821839 | --- | --- | --- | 1,28 | up   |
| 6715175 | 7373678 | 1805872 | --- | --- | --- | 1,07 | down |
| 6715178 | 7264808 | 1534473 | --- | --- | --- | 1,02 | down |
| 6715390 | 7108062 | 1147174 | --- | --- | --- | 1,02 | up   |

|         |         |         |     |     |     |      |      |
|---------|---------|---------|-----|-----|-----|------|------|
| 6715404 | 7293757 | 1605687 | --- | --- | --- | 1,09 | up   |
| 6715531 | 7368986 | 1792868 | --- | --- | --- | 1,20 | down |
| 6715609 | 7155116 | 1263425 | --- | --- | --- | 1,06 | down |
| 6715614 | 7146093 | 1240939 | --- | --- | --- | 1,09 | up   |
| 6715696 | 7240569 | 1475496 | --- | --- | --- | 1,14 | up   |
| 6715699 | 7237711 | 1467466 | --- | --- | --- | 1,03 | up   |
| 6715905 | 7096924 | 1119611 | --- | --- | --- | 1,34 | down |
| 6715938 | 7101258 | 1130579 | --- | --- | --- | 1,26 | up   |
| 6715952 | 7037764 | 980095  | --- | --- | --- | 1,33 | up   |
| 6716027 | 7196029 | 1365633 | --- | --- | --- | 1,04 | down |
| 6716101 | 7224182 | 1432784 | --- | --- | --- | 1,01 | down |
| 6716165 | 7349946 | 1744935 | --- | --- | --- | 1,03 | up   |
| 6716308 | 7364346 | 1779977 | --- | --- | --- | 1,64 | down |
| 6716312 | 7086664 | 1094288 | --- | --- | --- | 1,35 | down |
| 6716393 | 7100307 | 1128402 | --- | --- | --- | 1,30 | down |
| 6716428 | 7198274 | 1371196 | --- | --- | --- | 1,52 | down |
| 6716574 | 7195903 | 1365328 | --- | --- | --- | 1,10 | up   |
| 6716639 | 7068697 | 1052767 | --- | --- | --- | 1,06 | down |
| 6716701 | 7206133 | 1389983 | --- | --- | --- | 2,24 | up   |
| 6716702 | 7239752 | 1473197 | --- | --- | --- | 1,08 | up   |
| 6716769 | 7156052 | 1265764 | --- | --- | --- | 1,11 | up   |
| 6716778 | 7167507 | 1293111 | --- | --- | --- | 3,61 | down |
| 6716788 | 7248790 | 1494511 | --- | --- | --- | 1,02 | down |
| 6716796 | 7092549 | 1109173 | --- | --- | --- | 1,09 | down |
| 6716818 | 7118157 | 1172526 | --- | --- | --- | 1,12 | up   |
| 6716845 | 7117526 | 1170987 | --- | --- | --- | 1,59 | up   |
| 6716897 | 7101258 | 1130568 | --- | --- | --- | 1,26 | up   |
| 6716961 | 7161841 | 1279878 | --- | --- | --- | 1,28 | up   |
| 6716973 | 7092965 | 1110159 | --- | --- | --- | 1,01 | down |
| 6717016 | 7344530 | 1731557 | --- | --- | --- | 1,22 | down |
| 6717086 | 7050557 | 1010798 | --- | --- | --- | 1,65 | down |
| 6717112 | 7090278 | 1104135 | --- | --- | --- | 1,04 | down |
| 6717272 | 7343092 | 1727650 | --- | --- | --- | 1,31 | down |
| 6717289 | 7321414 | 1675626 | --- | --- | --- | 1,14 | up   |
| 6717335 | 7092549 | 1109122 | --- | --- | --- | 1,29 | down |
| 6717380 | 7206133 | 1389971 | --- | --- | --- | 1,05 | down |
| 6717523 | 7189987 | 1349813 | --- | --- | --- | 1,06 | up   |
| 6717525 | 7075082 | 1068519 | --- | --- | --- | 1,57 | up   |
| 6717544 | 7211144 | 1401546 | --- | --- | --- | 2,08 | up   |
| 6717554 | 7303722 | 1631720 | --- | --- | --- | 1,32 | down |
| 6717584 | 7184850 | 1337601 | --- | --- | --- | 1,01 | down |
| 6717595 | 7198644 | 1372300 | --- | --- | --- | 1,16 | down |
| 6717752 | 7236358 | 1464239 | --- | --- | --- | 1,18 | down |
| 6717807 | 7213908 | 1407655 | --- | --- | --- | 1,52 | down |
| 6717894 | 7148271 | 1246648 | --- | --- | --- | 1,12 | up   |
| 6718020 | 7179785 | 1324498 | --- | --- | --- | 1,08 | down |
| 6718141 | 7364346 | 1780042 | --- | --- | --- | 1,55 | up   |
| 6718173 | 7043535 | 994101  | --- | --- | --- | 1,10 | up   |
| 6718199 | 7105814 | 1141784 | --- | --- | --- | 1,18 | up   |
| 6718230 | 7320337 | 1673327 | --- | --- | --- | 1,15 | up   |
| 6718260 | 7188822 | 1346632 | --- | --- | --- | 1,06 | down |
| 6718261 | 7330396 | 1696389 | --- | --- | --- | 1,52 | down |
| 6718262 | 7180620 | 1326399 | --- | --- | --- | 1,31 | up   |
| 6718363 | 7198325 | 1371351 | --- | --- | --- | 1,11 | down |
| 6718472 | 7281140 | 1575713 | --- | --- | --- | 1,05 | up   |
| 6718480 | 7098126 | 1122985 | --- | --- | --- | 1,07 | down |



|         |         |         |     |     |     |      |      |
|---------|---------|---------|-----|-----|-----|------|------|
| 6718525 | 7350993 | 1747506 | --- | --- | --- | 1,48 | up   |
| 6718761 | 7043535 | 994086  | --- | --- | --- | 1,14 | down |
| 6718783 | 7131550 | 1205571 | --- | --- | --- | 1,03 | up   |
| 6719154 | 7290921 | 1599078 | --- | --- | --- | 1,24 | up   |
| 6719160 | 7167823 | 1293896 | --- | --- | --- | 1,48 | down |
| 6719175 | 7125348 | 1190099 | --- | --- | --- | 2,37 | up   |
| 6719229 | 7240569 | 1475519 | --- | --- | --- | 1,06 | down |
| 6719266 | 7071264 | 1059296 | --- | --- | --- | 1,16 | down |
| 6719398 | 7271213 | 1550644 | --- | --- | --- | 1,04 | up   |
| 6719455 | 7253408 | 1505950 | --- | --- | --- | 1,50 | up   |
| 6719730 | 7230698 | 1449061 | --- | --- | --- | 1,14 | up   |
| 6719762 | 7171047 | 1302367 | --- | --- | --- | 1,12 | up   |
| 6719768 | 7061367 | 1034850 | --- | --- | --- | 1,04 | up   |
| 6720050 | 7156061 | 1265830 | --- | --- | --- | 1,10 | up   |
| 6720157 | 7211363 | 1402064 | --- | --- | --- | 1,80 | down |
| 6720218 | 7334347 | 1705775 | --- | --- | --- | 2,25 | down |
| 6720365 | 7083030 | 1086271 | --- | --- | --- | 1,17 | down |
| 6720508 | 7330238 | 1695937 | --- | --- | --- | 1,41 | up   |
| 6720518 | 7034293 | 971942  | --- | --- | --- | 2,21 | up   |
| 6720594 | 7357890 | 1764391 | --- | --- | --- | 1,29 | up   |
| 6720709 | 7192696 | 1357180 | --- | --- | --- | 1,59 | up   |
| 6720729 | 7384179 | 1829775 | --- | --- | --- | 1,29 | down |
| 6720731 | 7157341 | 1269164 | --- | --- | --- | 1,02 | down |
| 6720747 | 7284153 | 1583020 | --- | --- | --- | 1,98 | down |
| 6720782 | 7236358 | 1464236 | --- | --- | --- | 1,28 | down |
| 6720797 | 7222221 | 1428078 | --- | --- | --- | 2,21 | up   |
| 6720895 | 7068853 | 1053101 | --- | --- | --- | 1,35 | up   |
| 6720923 | 7079905 | 1079345 | --- | --- | --- | 1,14 | down |
| 6721093 | 7142081 | 1230978 | --- | --- | --- | 1,27 | down |
| 6721110 | 7350237 | 1745471 | --- | --- | --- | 1,17 | down |
| 6721120 | 7307721 | 1642003 | --- | --- | --- | 1,01 | up   |
| 6721152 | 7384365 | 1830278 | --- | --- | --- | 1,07 | down |
| 6721200 | 7064468 | 1042364 | --- | --- | --- | 1,04 | up   |
| 6721224 | 7133612 | 1210284 | --- | --- | --- | 1,93 | down |
| 6721239 | 7170845 | 1301878 | --- | --- | --- | 1,52 | up   |
| 6721336 | 7268736 | 1544328 | --- | --- | --- | 1,08 | up   |
| 6721458 | 7058813 | 1028898 | --- | --- | --- | 1,18 | up   |
| 6721484 | 7070836 | 1058341 | --- | --- | --- | 1,17 | down |
| 6721554 | 7071264 | 1059296 | --- | --- | --- | 1,10 | down |
| 6721558 | 7278957 | 1570395 | --- | --- | --- | 1,03 | down |
| 6721599 | 7033504 | 969851  | --- | --- | --- | 1,32 | up   |
| 6721605 | 7170845 | 1301903 | --- | --- | --- | 1,47 | down |
| 6721907 | 7321414 | 1675634 | --- | --- | --- | 1,77 | down |
| 6721919 | 7043379 | 993645  | --- | --- | --- | 1,43 | up   |
| 6722088 | 7384365 | 1830288 | --- | --- | --- | 1,06 | down |
| 6722122 | 7036412 | 976879  | --- | --- | --- | 1,62 | down |
| 6722150 | 7131119 | 1204440 | --- | --- | --- | 1,26 | down |
| 6722153 | 7152889 | 1257377 | --- | --- | --- | 2,46 | down |
| 6722180 | 7070616 | 1057791 | --- | --- | --- | 1,38 | up   |
| 6722338 | 7070836 | 1058357 | --- | --- | --- | 1,45 | up   |
| 6722346 | 7088489 | 1099520 | --- | --- | --- | 1,05 | down |
| 6722382 | 7232340 | 1453533 | --- | --- | --- | 1,25 | down |
| 6722403 | 7256191 | 1512862 | --- | --- | --- | 1,16 | up   |
| 6722644 | 7186464 | 1341369 | --- | --- | --- | 1,54 | down |
| 6722765 | 7034293 | 971976  | --- | --- | --- | 1,21 | down |
| 6722959 | 7038530 | 981866  | --- | --- | --- | 1,08 | up   |

|         |         |         |     |     |     |      |      |
|---------|---------|---------|-----|-----|-----|------|------|
| 6723361 | 7073854 | 1065633 | --- | --- | --- | 1,90 | down |
| 6723373 | 7029770 | 960156  | --- | --- | --- | 1,23 | down |
| 6723399 | 7320337 | 1673340 | --- | --- | --- | 1,18 | up   |
| 6723554 | 7295410 | 1609702 | --- | --- | --- | 1,26 | up   |
| 6723591 | 7070455 | 1057349 | --- | --- | --- | 1,04 | up   |
| 6723730 | 7258520 | 1518890 | --- | --- | --- | 1,01 | up   |
| 6723911 | 7083030 | 1086261 | --- | --- | --- | 1,42 | down |
| 6724093 | 7236358 | 1464250 | --- | --- | --- | 1,23 | down |
| 6724125 | 7371253 | 1799562 | --- | --- | --- | 1,18 | up   |
| 6724165 | 7373906 | 1806366 | --- | --- | --- | 1,24 | down |
| 6724173 | 7206133 | 1389979 | --- | --- | --- | 1,11 | down |
| 6724223 | 7088164 | 1098468 | --- | --- | --- | 1,04 | down |
| 6724235 | 7193228 | 1358740 | --- | --- | --- | 1,48 | down |
| 6724430 | 7265259 | 1535445 | --- | --- | --- | 1,06 | down |
| 6724468 | 7131550 | 1205556 | --- | --- | --- | 1,79 | down |
| 6724482 | 7331719 | 1699919 | --- | --- | --- | 1,39 | up   |
| 6724495 | 7295410 | 1609752 | --- | --- | --- | 1,25 | up   |
| 6724546 | 7380019 | 1820827 | --- | --- | --- | 1,20 | down |
| 6724559 | 7056333 | 1023680 | --- | --- | --- | 1,12 | down |
| 6724630 | 7189669 | 1348990 | --- | --- | --- | 1,14 | up   |
| 6724766 | 7275674 | 1561650 | --- | --- | --- | 1,12 | up   |
| 6724839 | 7083031 | 1086282 | --- | --- | --- | 1,26 | down |
| 6725081 | 7376566 | 1812878 | --- | --- | --- | 1,58 | down |
| 6725090 | 7132024 | 1206337 | --- | --- | --- | 1,52 | up   |
| 6725117 | 7233440 | 1456913 | --- | --- | --- | 1,01 | down |
| 6725141 | 7358859 | 1767012 | --- | --- | --- | 1,47 | down |
| 6725199 | 7097525 | 1121031 | --- | --- | --- | 1,45 | up   |
| 6725260 | 7240569 | 1475334 | --- | --- | --- | 1,22 | down |
| 6725268 | 7274780 | 1559237 | --- | --- | --- | 1,16 | down |
| 6725298 | 7192902 | 1357749 | --- | --- | --- | 1,53 | up   |
| 6725321 | 7154584 | 1262107 | --- | --- | --- | 1,26 | up   |
| 6725326 | 7336250 | 1710171 | --- | --- | --- | 1,13 | down |
| 6725357 | 7148978 | 1248458 | --- | --- | --- | 1,12 | up   |
| 6725387 | 7340057 | 1720331 | --- | --- | --- | 1,39 | up   |
| 6725711 | 7060851 | 1033422 | --- | --- | --- | 1,09 | up   |
| 6725728 | 7080731 | 1080975 | --- | --- | --- | 1,38 | down |
| 6725823 | 7034756 | 973208  | --- | --- | --- | 1,03 | down |
| 6725892 | 7207069 | 1392012 | --- | --- | --- | 1,29 | up   |
| 6725956 | 7364346 | 1779965 | --- | --- | --- | 1,08 | down |
| 6725983 | 7037235 | 978573  | --- | --- | --- | 1,58 | down |
| 6726078 | 7139026 | 1223492 | --- | --- | --- | 1,25 | down |
| 6726163 | 7338807 | 1716826 | --- | --- | --- | 1,63 | down |
| 6726173 | 7068697 | 1052765 | --- | --- | --- | 1,25 | up   |
| 6726204 | 7052331 | 1014567 | --- | --- | --- | 1,12 | up   |
| 6726211 | 7206133 | 1389971 | --- | --- | --- | 1,43 | up   |
| 6726322 | 7176177 | 1315135 | --- | --- | --- | 1,10 | down |
| 6726438 | 7278957 | 1570394 | --- | --- | --- | 1,25 | down |
| 6726557 | 7068259 | 1051623 | --- | --- | --- | 1,16 | up   |
| 6726596 | 7343092 | 1727653 | --- | --- | --- | 1,25 | up   |
| 6726738 | 7361420 | 1773042 | --- | --- | --- | 1,09 | down |
| 6726832 | 7277783 | 1567455 | --- | --- | --- | 1,40 | up   |
| 6726857 | 7083030 | 1086254 | --- | --- | --- | 1,02 | up   |
| 6726894 | 7169573 | 1298391 | --- | --- | --- | 1,10 | up   |
| 6726978 | 7196187 | 1365964 | --- | --- | --- | 1,03 | down |
| 6727125 | 7099573 | 1126737 | --- | --- | --- | 1,21 | down |
| 6727248 | 7093936 | 1112478 | --- | --- | --- | 1,01 | down |

|         |         |         |     |     |     |      |      |
|---------|---------|---------|-----|-----|-----|------|------|
| 6727591 | 7355421 | 1758522 | --- | --- | --- | 1,96 | up   |
| 6727660 | 7088135 | 1098419 | --- | --- | --- | 1,39 | down |
| 6727677 | 7096859 | 1119295 | --- | --- | --- | 1,15 | down |
| 6727681 | 7025652 | 950354  | --- | --- | --- | 1,75 | up   |
| 6727728 | 7094346 | 1113394 | --- | --- | --- | 1,11 | down |
| 6727865 | 7299512 | 1620552 | --- | --- | --- | 1,28 | down |
| 6727873 | 7281077 | 1575557 | --- | --- | --- | 1,17 | up   |
| 6727890 | 7210600 | 1400515 | --- | --- | --- | 1,06 | down |
| 6727941 | 7301140 | 1624581 | --- | --- | --- | 1,13 | down |
| 6727974 | 7080131 | 1079796 | --- | --- | --- | 2,26 | down |
| 6727983 | 7339387 | 1718398 | --- | --- | --- | 1,04 | down |
| 6728212 | 7052385 | 1014783 | --- | --- | --- | 1,00 | up   |
| 6728216 | 7083965 | 1088219 | --- | --- | --- | 1,45 | down |
| 6728258 | 7181016 | 1327787 | --- | --- | --- | 1,20 | down |
| 6728301 | 7025652 | 950355  | --- | --- | --- | 1,26 | up   |
| 6728385 | 7280743 | 1574550 | --- | --- | --- | 1,42 | up   |
| 6728387 | 7356115 | 1760135 | --- | --- | --- | 1,25 | down |
| 6728431 | 7025652 | 950296  | --- | --- | --- | 1,07 | down |
| 6728496 | 7049399 | 1008359 | --- | --- | --- | 1,03 | up   |
| 6728548 | 7243363 | 1481603 | --- | --- | --- | 1,28 | down |
| 6728676 | 7320234 | 1673038 | --- | --- | --- | 1,04 | down |
| 6728772 | 7263152 | 1530351 | --- | --- | --- | 1,70 | down |
| 6728782 | 7039223 | 983551  | --- | --- | --- | 1,13 | down |
| 6728886 | 7156061 | 1265843 | --- | --- | --- | 1,10 | down |
| 6728894 | 7049399 | 1008375 | --- | --- | --- | 1,23 | up   |
| 6728919 | 7287238 | 1589771 | --- | --- | --- | 1,20 | down |
| 6728930 | 7297589 | 1615687 | --- | --- | --- | 1,28 | down |
| 6728967 | 7353712 | 1753914 | --- | --- | --- | 1,33 | up   |
| 6729037 | 7062436 | 1037669 | --- | --- | --- | 1,12 | up   |
| 6729073 | 7346066 | 1735292 | --- | --- | --- | 1,17 | down |
| 6729084 | 7316054 | 1662261 | --- | --- | --- | 3,61 | up   |
| 6729175 | 7280743 | 1574519 | --- | --- | --- | 1,28 | down |
| 6729191 | 7312903 | 1654099 | --- | --- | --- | 1,10 | up   |
| 6729216 | 7127540 | 1195275 | --- | --- | --- | 1,32 | down |
| 6729300 | 7233425 | 1456760 | --- | --- | --- | 1,05 | down |
| 6729369 | 7070616 | 1057770 | --- | --- | --- | 1,22 | up   |
| 6729426 | 7339110 | 1717610 | --- | --- | --- | 1,12 | up   |
| 6729449 | 7284359 | 1583435 | --- | --- | --- | 1,02 | up   |
| 6729658 | 7217747 | 1417487 | --- | --- | --- | 1,64 | up   |
| 6729690 | 7068259 | 1051657 | --- | --- | --- | 1,14 | up   |
| 6729794 | 7240569 | 1475367 | --- | --- | --- | 1,04 | down |
| 6729973 | 7268375 | 1543447 | --- | --- | --- | 1,53 | up   |
| 6730053 | 7378546 | 1817609 | --- | --- | --- | 1,20 | down |
| 6730135 | 7231775 | 1452134 | --- | --- | --- | 1,14 | up   |
| 6730234 | 7095262 | 1115635 | --- | --- | --- | 1,02 | up   |
| 6730325 | 7365183 | 1781900 | --- | --- | --- | 1,01 | up   |
| 6730383 | 7243130 | 1480892 | --- | --- | --- | 1,18 | down |
| 6730571 | 7040260 | 986079  | --- | --- | --- | 1,02 | down |
| 6730574 | 7192696 | 1357164 | --- | --- | --- | 1,12 | up   |
| 6730594 | 7243130 | 1480836 | --- | --- | --- | 1,69 | up   |
| 6730693 | 7056333 | 1023674 | --- | --- | --- | 1,23 | down |
| 6730705 | 7341397 | 1723647 | --- | --- | --- | 1,39 | up   |
| 6730735 | 7180732 | 1326731 | --- | --- | --- | 1,48 | down |
| 6730783 | 7368613 | 1791627 | --- | --- | --- | 1,03 | down |
| 6730946 | 7301140 | 1624582 | --- | --- | --- | 1,17 | down |
| 6730986 | 7099517 | 1126495 | --- | --- | --- | 1,48 | down |

|         |         |         |     |     |     |      |      |
|---------|---------|---------|-----|-----|-----|------|------|
| 6731020 | 7176456 | 1315830 | --- | --- | --- | 1,01 | up   |
| 6731023 | 7301140 | 1624591 | --- | --- | --- | 1,02 | up   |
| 6731035 | 7243647 | 1482454 | --- | --- | --- | 1,28 | down |
| 6731241 | 7274892 | 1559559 | --- | --- | --- | 1,02 | down |
| 6731261 | 7321029 | 1674804 | --- | --- | --- | 1,10 | up   |
| 6731322 | 7117526 | 1170987 | --- | --- | --- | 1,14 | up   |
| 6731472 | 7226241 | 1437786 | --- | --- | --- | 1,43 | down |
| 6731562 | 7331719 | 1699918 | --- | --- | --- | 1,55 | down |
| 6731577 | 7111573 | 1156015 | --- | --- | --- | 1,47 | down |
| 6731586 | 7039223 | 983554  | --- | --- | --- | 1,07 | down |
| 6731588 | 7357815 | 1764124 | --- | --- | --- | 1,28 | down |
| 6731622 | 7073950 | 1065927 | --- | --- | --- | 1,42 | up   |
| 6731637 | 7307721 | 1641991 | --- | --- | --- | 1,14 | down |
| 6731642 | 7256191 | 1512862 | --- | --- | --- | 1,00 | down |
| 6731662 | 7171047 | 1302367 | --- | --- | --- | 1,46 | up   |
| 6731822 | 7115880 | 1166832 | --- | --- | --- | 1,19 | up   |
| 6731828 | 7060195 | 1031972 | --- | --- | --- | 1,15 | down |
| 6731896 | 7272110 | 1553074 | --- | --- | --- | 1,02 | down |
| 6731902 | 7248004 | 1492563 | --- | --- | --- | 1,45 | up   |
| 6731910 | 7067670 | 1050308 | --- | --- | --- | 1,82 | up   |
| 6731912 | 7213908 | 1407732 | --- | --- | --- | 1,11 | up   |
| 6732060 | 7099573 | 1126743 | --- | --- | --- | 1,42 | up   |
| 6732075 | 7073950 | 1065899 | --- | --- | --- | 1,23 | down |
| 6732137 | 7336931 | 1711853 | --- | --- | --- | 1,07 | down |
| 6732195 | 7075424 | 1069280 | --- | --- | --- | 1,07 | up   |
| 6732225 | 7139085 | 1223672 | --- | --- | --- | 1,18 | down |
| 6732436 | 7374842 | 1808987 | --- | --- | --- | 1,25 | down |
| 6732488 | 7149817 | 1250307 | --- | --- | --- | 1,15 | up   |
| 6732711 | 7222221 | 1428057 | --- | --- | --- | 1,17 | down |
| 6732756 | 7287337 | 1589991 | --- | --- | --- | 4,04 | down |
| 6732829 | 7264085 | 1532719 | --- | --- | --- | 1,05 | up   |
| 6733012 | 7364346 | 1780007 | --- | --- | --- | 1,19 | up   |
| 6733119 | 7235069 | 1460969 | --- | --- | --- | 1,05 | up   |
| 6733401 | 7343052 | 1727538 | --- | --- | --- | 1,94 | down |
| 6733566 | 7379957 | 1820631 | --- | --- | --- | 1,03 | down |
| 6733581 | 7240569 | 1475486 | --- | --- | --- | 1,32 | up   |
| 6734016 | 7199476 | 1374549 | --- | --- | --- | 1,14 | up   |
| 6734069 | 7156372 | 1266715 | --- | --- | --- | 1,17 | down |
| 6734117 | 7243130 | 1480874 | --- | --- | --- | 1,33 | down |
| 6734264 | 7097485 | 1120945 | --- | --- | --- | 3,26 | down |
| 6734272 | 7365183 | 1781921 | --- | --- | --- | 1,12 | up   |
| 6734289 | 7076236 | 1071211 | --- | --- | --- | 1,17 | down |
| 6734366 | 7342959 | 1727344 | --- | --- | --- | 1,53 | down |
| 6734389 | 7239939 | 1473789 | --- | --- | --- | 1,23 | down |
| 6734443 | 7274892 | 1559564 | --- | --- | --- | 1,43 | up   |
| 6734620 | 7232340 | 1453520 | --- | --- | --- | 1,09 | up   |
| 6734730 | 7167507 | 1293135 | --- | --- | --- | 1,08 | up   |
| 6734819 | 7254040 | 1507577 | --- | --- | --- | 1,37 | up   |
| 6734881 | 7279881 | 1572739 | --- | --- | --- | 1,06 | up   |
| 6734921 | 7123421 | 1185811 | --- | --- | --- | 1,06 | down |
| 6734947 | 7280743 | 1574539 | --- | --- | --- | 1,09 | up   |
| 6734997 | 7243647 | 1482482 | --- | --- | --- | 1,06 | up   |
| 6735007 | 7203872 | 1384778 | --- | --- | --- | 1,26 | up   |
| 6735141 | 7286807 | 1588817 | --- | --- | --- | 1,02 | down |
| 6735142 | 7157341 | 1269149 | --- | --- | --- | 1,16 | down |
| 6735184 | 7249503 | 1496233 | --- | --- | --- | 1,53 | up   |

|         |         |         |     |     |     |      |      |
|---------|---------|---------|-----|-----|-----|------|------|
| 6735210 | 7069464 | 1054652 | --- | --- | --- | 1,34 | down |
| 6735241 | 7233923 | 1458163 | --- | --- | --- | 1,17 | down |
| 6735250 | 7217321 | 1416033 | --- | --- | --- | 1,22 | down |
| 6735293 | 7369781 | 1795033 | --- | --- | --- | 1,02 | down |
| 6735303 | 7224724 | 1433961 | --- | --- | --- | 1,57 | down |
| 6735370 | 7248790 | 1494555 | --- | --- | --- | 1,14 | up   |
| 6735417 | 7115362 | 1165608 | --- | --- | --- | 1,08 | down |
| 6735439 | 7056333 | 1023674 | --- | --- | --- | 1,10 | down |
| 6735462 | 7240569 | 1475472 | --- | --- | --- | 1,20 | up   |
| 6735476 | 7274780 | 1559225 | --- | --- | --- | 1,69 | down |
| 6735544 | 7072754 | 1062656 | --- | --- | --- | 1,68 | down |
| 6735644 | 7112225 | 1157549 | --- | --- | --- | 1,00 | up   |
| 6735714 | 7035344 | 974296  | --- | --- | --- | 2,09 | up   |
| 6735822 | 7330396 | 1696359 | --- | --- | --- | 1,23 | down |
| 6735836 | 7133749 | 1210818 | --- | --- | --- | 1,23 | down |
| 6736022 | 7100257 | 1128241 | --- | --- | --- | 1,21 | down |
| 6736180 | 7248790 | 1494569 | --- | --- | --- | 1,49 | down |
| 6736193 | 7293402 | 1604847 | --- | --- | --- | 1,33 | up   |
| 6736222 | 7273744 | 1557024 | --- | --- | --- | 1,44 | down |
| 6736277 | 7176456 | 1315855 | --- | --- | --- | 1,12 | down |
| 6736472 | 7138131 | 1221491 | --- | --- | --- | 1,21 | down |
| 6736604 | 7049399 | 1008358 | --- | --- | --- | 1,04 | up   |
| 6736621 | 7232340 | 1453523 | --- | --- | --- | 1,04 | up   |
| 6736661 | 7344836 | 1732409 | --- | --- | --- | 1,07 | up   |
| 6736690 | 7364346 | 1780015 | --- | --- | --- | 1,43 | down |
| 6736766 | 7222221 | 1428059 | --- | --- | --- | 1,07 | up   |
| 6736774 | 7213908 | 1407762 | --- | --- | --- | 1,64 | up   |
| 6736775 | 7198210 | 1370995 | --- | --- | --- | 1,13 | down |
| 6736865 | 7171034 | 1302274 | --- | --- | --- | 1,09 | down |
| 6736967 | 7321029 | 1674829 | --- | --- | --- | 1,15 | up   |
| 6737105 | 7319937 | 1672249 | --- | --- | --- | 1,12 | down |
| 6737171 | 7025652 | 950312  | --- | --- | --- | 1,02 | down |
| 6737196 | 7327169 | 1688457 | --- | --- | --- | 1,28 | up   |
| 6737261 | 7235069 | 1460969 | --- | --- | --- | 1,69 | up   |
| 6737300 | 7113483 | 1161000 | --- | --- | --- | 1,16 | down |
| 6737314 | 7070616 | 1057773 | --- | --- | --- | 1,06 | up   |
| 6737417 | 7097525 | 1121044 | --- | --- | --- | 1,13 | down |
| 6737552 | 7315571 | 1660967 | --- | --- | --- | 1,15 | up   |
| 6737589 | 7199476 | 1374533 | --- | --- | --- | 1,08 | down |
| 6737633 | 7384073 | 1829455 | --- | --- | --- | 1,00 | down |
| 6737646 | 7211363 | 1402055 | --- | --- | --- | 1,44 | down |
| 6737752 | 7050557 | 1010794 | --- | --- | --- | 1,11 | down |
| 6737910 | 7087965 | 1098051 | --- | --- | --- | 1,04 | up   |
| 6737926 | 7060851 | 1033417 | --- | --- | --- | 1,10 | up   |
| 6737950 | 7339387 | 1718373 | --- | --- | --- | 1,28 | up   |
| 6738068 | 7352635 | 1751450 | --- | --- | --- | 1,17 | down |
| 6738182 | 7232029 | 1452750 | --- | --- | --- | 1,16 | up   |
| 6738264 | 7156052 | 1265763 | --- | --- | --- | 1,05 | down |
| 6738277 | 7197820 | 1370087 | --- | --- | --- | 1,20 | up   |
| 6738405 | 7277783 | 1567420 | --- | --- | --- | 3,11 | down |
| 6738429 | 7294264 | 1606843 | --- | --- | --- | 1,55 | down |
| 6738443 | 7115362 | 1165605 | --- | --- | --- | 1,29 | down |
| 6738458 | 7142770 | 1232719 | --- | --- | --- | 1,03 | down |
| 6738550 | 7321029 | 1674815 | --- | --- | --- | 2,64 | up   |
| 6738553 | 7139026 | 1223507 | --- | --- | --- | 1,01 | down |
| 6738583 | 7118196 | 1172699 | --- | --- | --- | 1,04 | down |

|         |         |         |     |     |     |      |      |
|---------|---------|---------|-----|-----|-----|------|------|
| 6738670 | 7112566 | 1158635 | --- | --- | --- | 1,02 | down |
| 6738741 | 7235076 | 1461023 | --- | --- | --- | 1,19 | down |
| 6738748 | 7115708 | 1166470 | --- | --- | --- | 1,79 | down |
| 6738789 | 7034532 | 972655  | --- | --- | --- | 1,46 | down |
| 6738832 | 7303616 | 1631310 | --- | --- | --- | 1,02 | up   |
| 6739008 | 7307424 | 1641139 | --- | --- | --- | 1,06 | up   |
| 6739032 | 7373678 | 1805854 | --- | --- | --- | 1,77 | down |
| 6739237 | 7230611 | 1448824 | --- | --- | --- | 1,18 | up   |
| 6739315 | 7243130 | 1480823 | --- | --- | --- | 1,18 | up   |
| 6739375 | 7086751 | 1094623 | --- | --- | --- | 1,21 | up   |
| 6739469 | 7240569 | 1475358 | --- | --- | --- | 1,11 | up   |
| 6739616 | 7226301 | 1438070 | --- | --- | --- | 2,31 | down |
| 6739662 | 7143455 | 1234736 | --- | --- | --- | 1,00 | up   |
| 6739666 | 7078666 | 1076526 | --- | --- | --- | 1,24 | down |
| 6739747 | 7340757 | 1721888 | --- | --- | --- | 1,01 | up   |
| 6739842 | 7239774 | 1473320 | --- | --- | --- | 2,90 | down |
| 6739879 | 7384509 | 1830738 | --- | --- | --- | 1,38 | up   |
| 6740096 | 7295410 | 1609685 | --- | --- | --- | 1,11 | down |
| 6740182 | 7039223 | 983559  | --- | --- | --- | 1,31 | down |
| 6740458 | 7069724 | 1055338 | --- | --- | --- | 1,20 | down |
| 6740460 | 7084193 | 1089125 | --- | --- | --- | 1,49 | up   |
| 6740475 | 7214605 | 1409374 | --- | --- | --- | 1,22 | down |
| 6740535 | 7068942 | 1053383 | --- | --- | --- | 1,21 | up   |
| 6740606 | 7058713 | 1028664 | --- | --- | --- | 1,33 | up   |
| 6740697 | 7092549 | 1109129 | --- | --- | --- | 1,50 | down |
| 6740740 | 7372840 | 1803770 | --- | --- | --- | 1,13 | up   |
| 6740796 | 7037764 | 980108  | --- | --- | --- | 2,07 | down |
| 6740822 | 7378997 | 1818638 | --- | --- | --- | 1,01 | down |
| 6740871 | 7191983 | 1355173 | --- | --- | --- | 1,77 | up   |
| 6741066 | 7321029 | 1674823 | --- | --- | --- | 1,14 | down |
| 6741080 | 7217650 | 1417183 | --- | --- | --- | 1,08 | down |
| 6741137 | 7176409 | 1315677 | --- | --- | --- | 1,25 | down |
| 6741161 | 7321029 | 1674803 | --- | --- | --- | 1,13 | up   |
| 6741238 | 7076236 | 1071185 | --- | --- | --- | 1,22 | up   |
| 6741374 | 7323560 | 1680031 | --- | --- | --- | 1,22 | down |
| 6741395 | 7351949 | 1749805 | --- | --- | --- | 1,29 | down |
| 6741410 | 7059375 | 1030073 | --- | --- | --- | 1,54 | up   |
| 6741583 | 7084993 | 1090676 | --- | --- | --- | 1,01 | down |
| 6741754 | 7127540 | 1195275 | --- | --- | --- | 2,87 | up   |
| 6741777 | 7369706 | 1794794 | --- | --- | --- | 1,15 | down |
| 6741888 | 7186688 | 1341839 | --- | --- | --- | 1,48 | down |
| 6741904 | 7197056 | 1367848 | --- | --- | --- | 1,59 | up   |
| 6741951 | 7039223 | 983561  | --- | --- | --- | 1,07 | up   |
| 6741972 | 7367948 | 1788968 | --- | --- | --- | 1,07 | up   |
| 6742028 | 7121866 | 1181876 | --- | --- | --- | 2,67 | up   |
| 6742037 | 7050167 | 1009826 | --- | --- | --- | 1,13 | down |
| 6742077 | 7065265 | 1044561 | --- | --- | --- | 1,12 | up   |
| 6742122 | 7380019 | 1820832 | --- | --- | --- | 1,33 | down |
| 6742125 | 7176409 | 1315677 | --- | --- | --- | 1,25 | up   |
| 6742141 | 7243130 | 1480905 | --- | --- | --- | 1,14 | up   |
| 6742259 | 7111181 | 1155235 | --- | --- | --- | 1,25 | up   |
| 6742288 | 7092549 | 1109150 | --- | --- | --- | 1,04 | down |
| 6742408 | 7052813 | 1015919 | --- | --- | --- | 1,08 | down |
| 6742454 | 7239752 | 1473161 | --- | --- | --- | 1,22 | up   |
| 6742640 | 7145669 | 1240006 | --- | --- | --- | 1,18 | down |
| 6742656 | 7213945 | 1407837 | --- | --- | --- | 1,20 | up   |

|         |         |         |     |     |     |      |      |
|---------|---------|---------|-----|-----|-----|------|------|
| 6742710 | 7297589 | 1615680 | --- | --- | --- | 1,10 | down |
| 6742859 | 7031576 | 964107  | --- | --- | --- | 1,24 | down |
| 6742957 | 7037764 | 980075  | --- | --- | --- | 1,02 | down |
| 6742958 | 7034756 | 973223  | --- | --- | --- | 1,14 | up   |
| 6742995 | 7384073 | 1829468 | --- | --- | --- | 1,34 | up   |
| 6743073 | 7238252 | 1469270 | --- | --- | --- | 1,09 | down |
| 6743121 | 7156061 | 1265818 | --- | --- | --- | 1,02 | up   |
| 6743142 | 7217747 | 1417495 | --- | --- | --- | 1,08 | down |
| 6743245 | 7192696 | 1357181 | --- | --- | --- | 1,03 | up   |
| 6743310 | 7101400 | 1130913 | --- | --- | --- | 1,09 | down |
| 6743339 | 7059375 | 1030068 | --- | --- | --- | 1,07 | down |
| 6743342 | 7232029 | 1452788 | --- | --- | --- | 1,62 | up   |
| 6743403 | 7329846 | 1694992 | --- | --- | --- | 1,75 | down |
| 6743414 | 7193644 | 1359708 | --- | --- | --- | 1,49 | down |
| 6743626 | 7342959 | 1727353 | --- | --- | --- | 1,36 | up   |
| 6743629 | 7271008 | 1549963 | --- | --- | --- | 1,14 | up   |
| 6743823 | 7229886 | 1447144 | --- | --- | --- | 1,06 | down |
| 6743836 | 7351951 | 1749837 | --- | --- | --- | 1,19 | down |
| 6743891 | 7075096 | 1068576 | --- | --- | --- | 1,24 | down |
| 6743929 | 7346066 | 1735284 | --- | --- | --- | 1,24 | up   |
| 6743947 | 7333333 | 1703403 | --- | --- | --- | 1,14 | up   |
| 6744082 | 7230886 | 1449515 | --- | --- | --- | 1,69 | up   |
| 6744184 | 7070836 | 1058362 | --- | --- | --- | 1,75 | up   |
| 6744238 | 7314270 | 1657736 | --- | --- | --- | 1,05 | down |
| 6744360 | 7188138 | 1345047 | --- | --- | --- | 1,02 | down |
| 6744432 | 7330396 | 1696336 | --- | --- | --- | 1,22 | down |
| 6744439 | 7087965 | 1098041 | --- | --- | --- | 1,04 | up   |
| 6744472 | 7344406 | 1731265 | --- | --- | --- | 1,25 | up   |
| 6744574 | 7372840 | 1803777 | --- | --- | --- | 1,85 | up   |
| 6744589 | 7267953 | 1542230 | --- | --- | --- | 1,22 | down |
| 6744662 | 7169732 | 1298700 | --- | --- | --- | 1,26 | down |
| 6744704 | 7342959 | 1727353 | --- | --- | --- | 1,02 | down |
| 6744705 | 7334331 | 1705688 | --- | --- | --- | 2,12 | up   |
| 6744791 | 7376566 | 1812871 | --- | --- | --- | 1,31 | down |
| 6744837 | 7323545 | 1679958 | --- | --- | --- | 1,08 | up   |
| 6744855 | 7294264 | 1606843 | --- | --- | --- | 1,63 | down |
| 6744856 | 7279568 | 1572040 | --- | --- | --- | 1,97 | up   |
| 6744887 | 7343868 | 1729856 | --- | --- | --- | 1,06 | up   |
| 6745004 | 7083030 | 1086264 | --- | --- | --- | 2,15 | down |
| 6745034 | 7371682 | 1800783 | --- | --- | --- | 1,18 | up   |
| 6745077 | 7050930 | 1011614 | --- | --- | --- | 1,56 | up   |
| 6745113 | 7146093 | 1240933 | --- | --- | --- | 1,18 | down |
| 6745164 | 7240569 | 1475459 | --- | --- | --- | 1,09 | down |
| 6745184 | 7067670 | 1050334 | --- | --- | --- | 1,37 | down |
| 6745232 | 7260613 | 1524293 | --- | --- | --- | 1,35 | up   |
| 6745295 | 7039661 | 984688  | --- | --- | --- | 2,30 | up   |
| 6745307 | 7062173 | 1037017 | --- | --- | --- | 1,06 | down |
| 6745349 | 7253408 | 1505937 | --- | --- | --- | 1,04 | down |
| 6745511 | 7249503 | 1496221 | --- | --- | --- | 1,16 | down |
| 6745512 | 7132024 | 1206337 | --- | --- | --- | 1,81 | down |
| 6745572 | 7350993 | 1747532 | --- | --- | --- | 1,16 | up   |
| 6745605 | 7174114 | 1310429 | --- | --- | --- | 1,08 | down |
| 6745732 | 7297274 | 1614664 | --- | --- | --- | 1,61 | down |
| 6745824 | 7174149 | 1310530 | --- | --- | --- | 1,06 | up   |
| 6745830 | 7380019 | 1820831 | --- | --- | --- | 1,16 | up   |
| 6745840 | 7198002 | 1370425 | --- | --- | --- | 2,23 | up   |

|         |         |         |     |     |     |      |      |
|---------|---------|---------|-----|-----|-----|------|------|
| 6745860 | 7319259 | 1670398 | --- | --- | --- | 1,17 | down |
| 6745876 | 7253408 | 1505948 | --- | --- | --- | 1,58 | up   |
| 6745934 | 7047524 | 1004652 | --- | --- | --- | 1,03 | up   |
| 6745948 | 7297274 | 1614630 | --- | --- | --- | 1,19 | down |
| 6746070 | 7240569 | 1475315 | --- | --- | --- | 1,21 | down |
| 6746072 | 7363674 | 1778436 | --- | --- | --- | 1,04 | up   |
| 6746287 | 7233425 | 1456801 | --- | --- | --- | 1,36 | down |
| 6746330 | 7213908 | 1407658 | --- | --- | --- | 1,00 | up   |
| 6746426 | 7351951 | 1749819 | --- | --- | --- | 1,45 | up   |
| 6746608 | 7303722 | 1631717 | --- | --- | --- | 1,05 | down |
| 6746618 | 7198210 | 1370965 | --- | --- | --- | 1,40 | up   |
| 6746675 | 7316054 | 1662303 | --- | --- | --- | 1,70 | up   |
| 6746676 | 7253272 | 1505515 | --- | --- | --- | 1,36 | down |
| 6746746 | 7243130 | 1480914 | --- | --- | --- | 1,03 | down |
| 6746765 | 7340838 | 1722081 | --- | --- | --- | 1,05 | up   |
| 6746770 | 7217650 | 1417179 | --- | --- | --- | 1,37 | up   |
| 6746793 | 7240569 | 1475389 | --- | --- | --- | 1,01 | down |
| 6746801 | 7344406 | 1731186 | --- | --- | --- | 1,12 | down |
| 6746829 | 7094139 | 1112916 | --- | --- | --- | 5,32 | down |
| 6746969 | 7037764 | 979973  | --- | --- | --- | 1,17 | down |

Primary rat  $\beta$ -cells were left untreated or exposed to TNF- $\alpha$ +IFN- $\gamma$  for 24h. Data are results obtained from a pool of 3 independent biological experiments. Splicing index is the fold change of a spliced variant compared to control cells. up/down indicate respectively up- or down-regulation of splicing
